# Supplementary material for: Hardy-Weinberg Equilibrium Testing of Biological Ascertainment for Mendelian Randomization Studies
Source: PubMed Central journal article supplement — Am J Epidemiol. 2009 Jan 6;169(4):505–14. doi: 10.1093/aje/kwn359 (PMC2640163; doi:10.1093/aje/kwn359), 2009-01-06

Web Figure 1. Three-dimensional plots showing the joint distribution of allele frequency  $p$ , the proportional multiplier  $k$  [shown as  $\text{Abs}(1-k)$ ] and sample size ( $n$ ) in homozygotes (Figures 2A and 2C) and in heterozygotes (Figures 2B and 2D). Non-significant  $\chi^2$  are shown in Figures 2A and 2B whereas significant  $\chi^2$  are shown in Figures 2C and 2D.

A) Homozygotes;  $\chi^2 < 3.84$

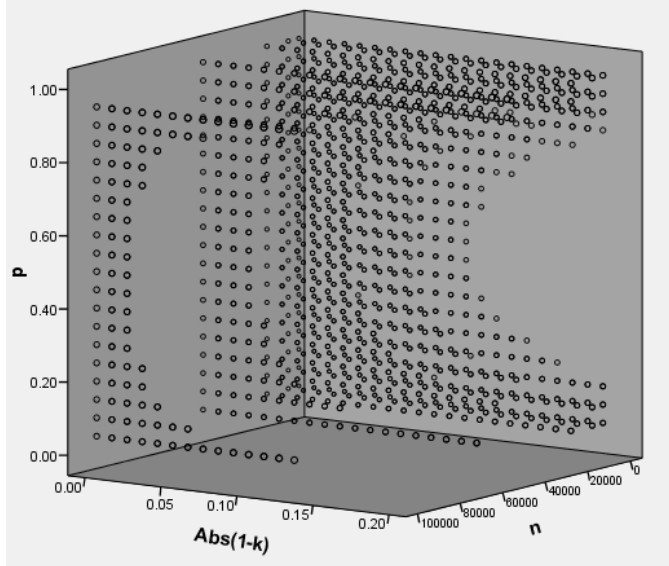

B) Heterozygotes;  $\chi^2 < 3.84$

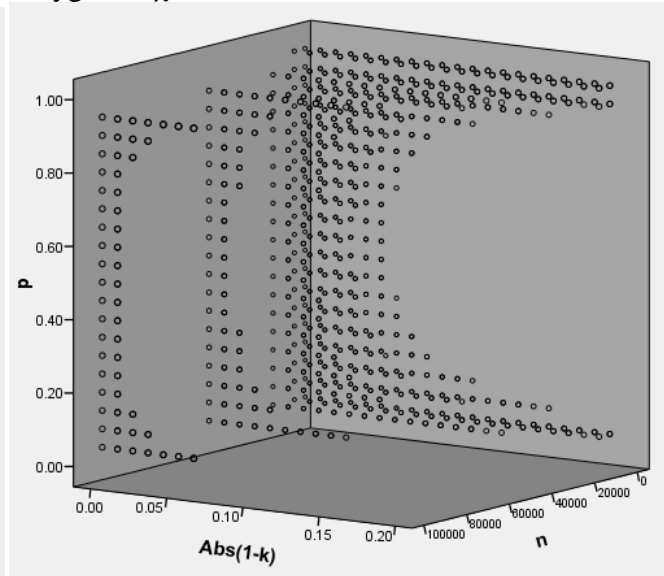

C) Homozygotes;  $\chi^2 \geq 3.84$

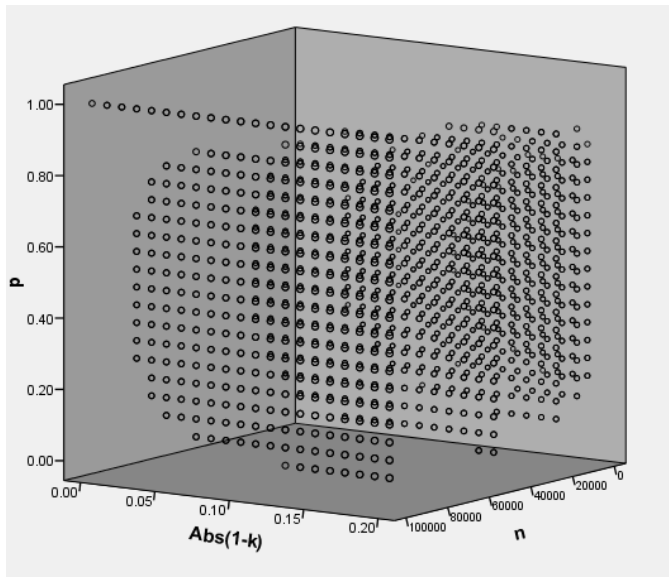

D) Heterozygotes;  $\chi^2 \geq 3.84$

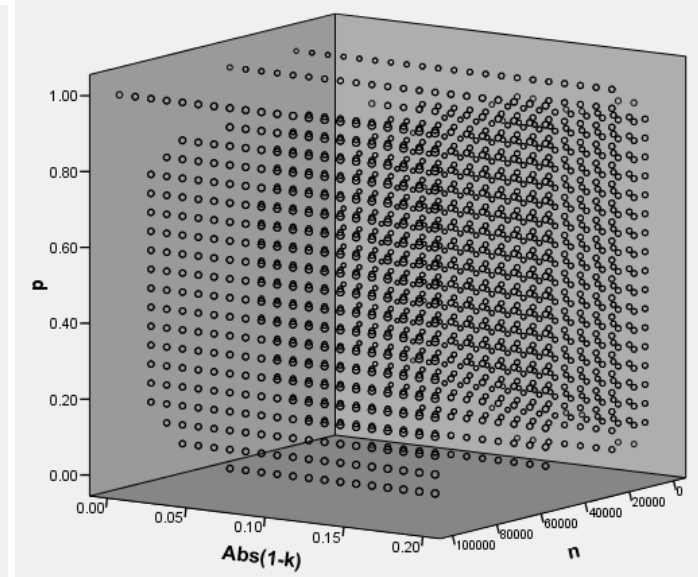

Supplement: kwn359_1.pdf [file kwn359_1.pdf]
