# Supplementary material for: Hardy-Weinberg Equilibrium Testing of Biological Ascertainment for Mendelian Randomization Studies
Source: PubMed Central journal article supplement — Am J Epidemiol. 2009 Jan 6;169(4):505–14. doi: 10.1093/aje/kwn359 (PMC2640163; doi:10.1093/aje/kwn359), 2009-01-06

Web Figure 2. Q-Q plots comparing the expected and observed  $\chi^2$  values for WTCCC controls and each of the seven case collections: bipolar disorder (BD), Crohn's disease (CD), coronary artery disease (CAD), hypertension (HT), rheumatoid arthritis (RA), type 1 diabetes (T1D) and type 2 diabetes (T2D).

**Q-Q plot for controls**

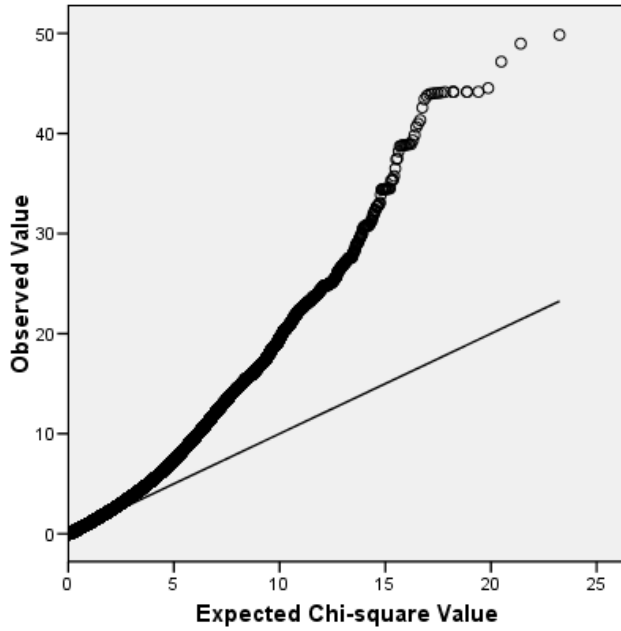

**Q-Q plot for BD cases**

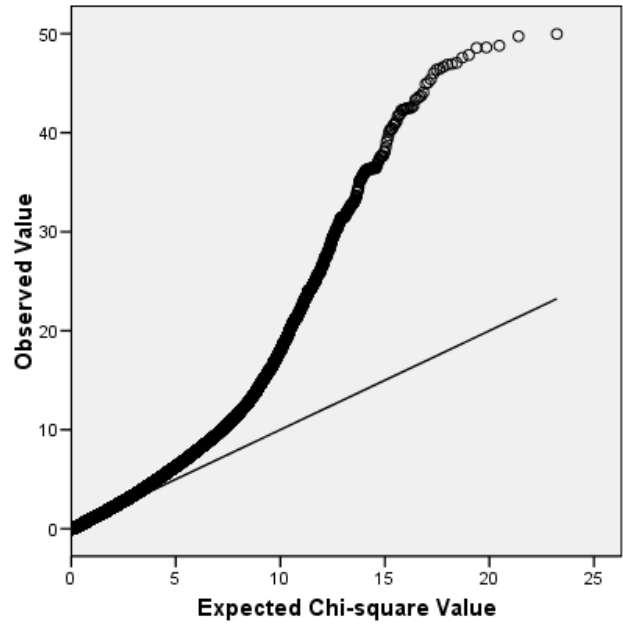

**Q-Q plot for CD cases**

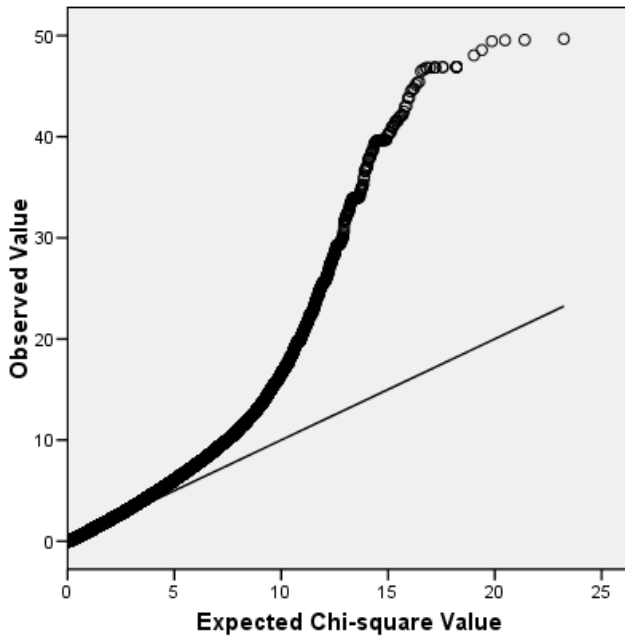

**Q-Q plot for CAD cases**

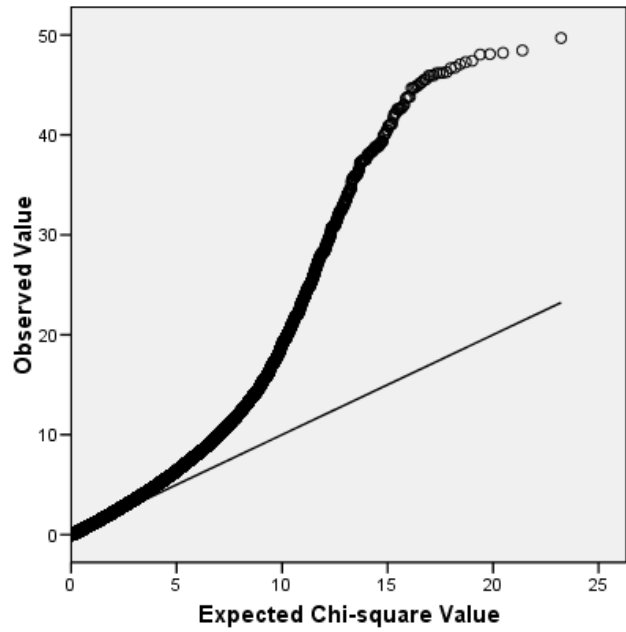

Q-Q plot for HT cases

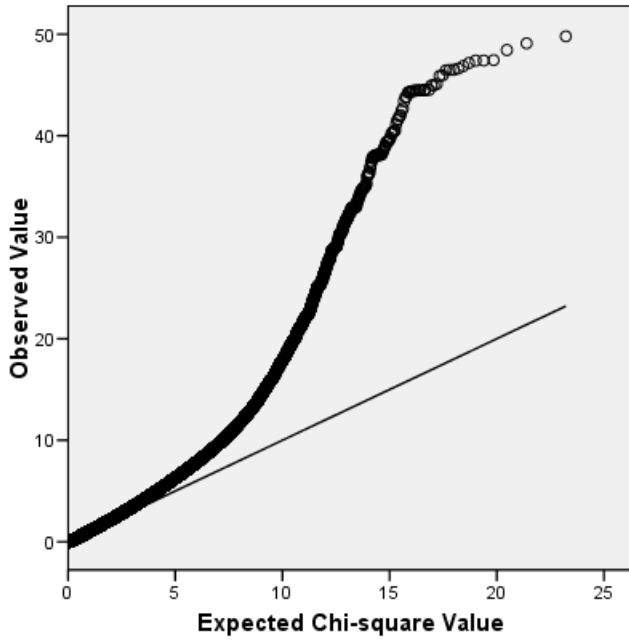

Q-Q plot for RA cases

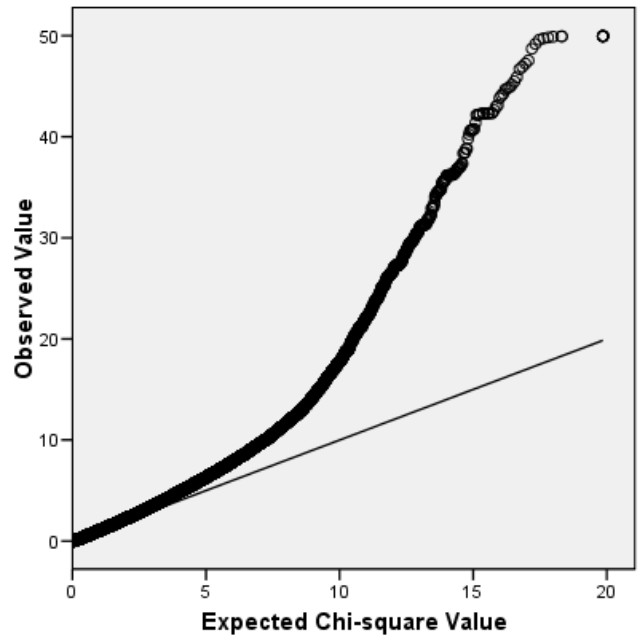

Q-Q plot for T1D cases

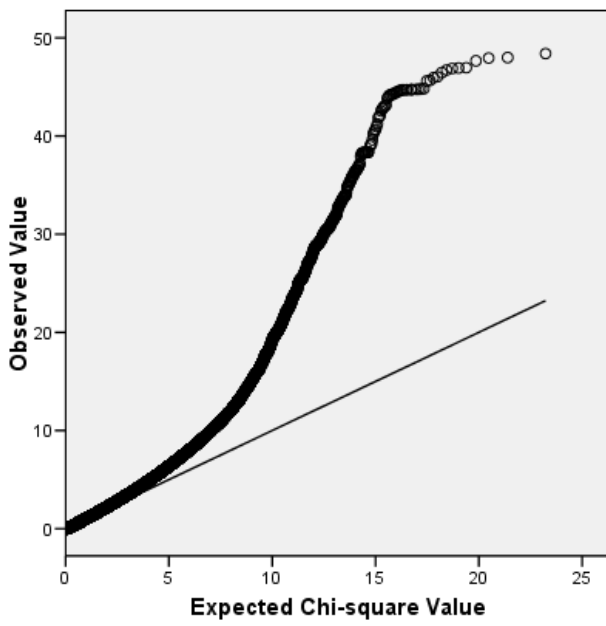

Q-Q plot for T2D cases

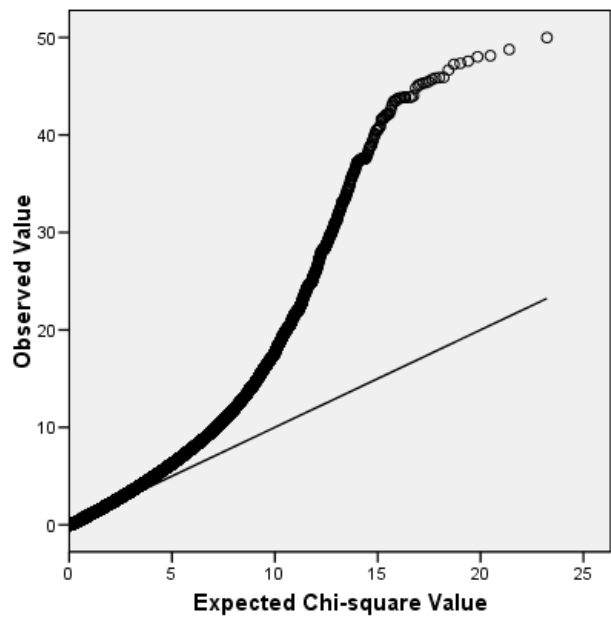

Supplement: kwn359_2.pdf [file kwn359_2.pdf]
