# Supplementary material for: Hardy-Weinberg Equilibrium Testing of Biological Ascertainment for Mendelian Randomization Studies
Source: PubMed Central journal article supplement — Am J Epidemiol. 2009 Jan 6;169(4):505–14. doi: 10.1093/aje/kwn359 (PMC2640163; doi:10.1093/aje/kwn359), 2009-01-06
Supplement: kwn359_3.pdf [file kwn359_3.pdf]

Web Table 1. List of 30 *APOE* studies published in the literature with reported P values and calculated  $\chi^2$  values

| Study                                                                                                                                                                                                                                                             | Reported result  | $\chi^2$ |
|-------------------------------------------------------------------------------------------------------------------------------------------------------------------------------------------------------------------------------------------------------------------|------------------|----------|
| Klaver et al., Genetic association of apolipoprotein E with age-related macular degeneration. <i>Am J Hum Genet</i> 1998;63:200–6.                                                                                                                                | P = 0.087        | 6.57     |
| Souied et al., The epsilon4 allele of the apolipoprotein E gene as a potential protective factor for exudative age-related macular degeneration. <i>Am J Ophthalmol</i> 1998;125:353–9.                                                                           | P = 0.673        | 1.54     |
| Schmidt et al., Association of the apolipoprotein E gene with age-related macular degeneration: possible effect modification by family history, age, and gender. <i>Mol Vis</i> 2000;6:287–93.                                                                    | P = 0.594        | 1.90     |
| Simonelli et al., Apolipoprotein E polymorphisms in age-related macular degeneration in an Italian population. <i>Ophthalmic Res</i> 2001;33:325–8.                                                                                                               | P = 0.001        | 16.27    |
| Schmidt et al., A pooled case-control study of the apolipoprotein E (APOE) gene in age-related maculopathy. <i>Ophthalmic Genet</i> 2002;23:209–23.                                                                                                               | P = 0.856        | 0.77     |
| Schultz et al., Lack of an association of apolipoprotein E gene polymorphisms with familial age-related macular degeneration. <i>Arch Ophthalmol</i> 2003; 121:679–83.                                                                                            | P = 0.716        | 1.36     |
| Baird et al. The epsilon2 and epsilon4 alleles of the apolipoprotein gene are associated with gerelated macular degeneration. <i>Invest Ophthalmol Vis Sci</i> 2004;45:1311–15.                                                                                   | P = 0.143        | 5.43     |
| Zareparsi et al. Association of apolipoprotein E alleles with susceptibility to age-related macular degeneration in a large cohort from a single center. <i>Invest Ophthalmol Vis Sci</i> 2004;45:1306–10.                                                        | P = 0.053        | 7.68     |
| Gotoh et al. Apolipoprotein E polymorphisms in Japanese patients with polypoidal choroidal vasculopathy and exudative age-related macular degeneration. <i>Am J Ophthalmol</i> 2004;138:567–73.                                                                   | P = 0.352        | 3.27     |
| Pang et al. The apolipoprotein E epsilon4 allele is unlikely to be a major risk factor of agerelated macular degeneration in Chinese. <i>Ophthalmologica</i> 2000;214:289–91.                                                                                     | P = 0.799        | 1.01     |
| Bettencourt et al., Polymorphism of the APOE Locus in the Azores Islands (Portugal) <i>Human Biology</i> 78.4 (2006) 509-512                                                                                                                                      | P = 0.9290       | 0.45     |
| Gene et al., Low Apolipoprotein E $\epsilon$ 4 Allele Frequency in the Population of Catalonia (Spain) Determined by PCR-RFLP and Laser Fluorescent Sequencer <i>European Journal of Epidemiology</i> , Vol. 13, No. 7. (Oct., 1997), pp. 841-843                 | $\chi^2 = 0.374$ | 0.37     |
| Martin et al., SNPing Away at Complex Diseases: Analysis of Single-Nucleotide Polymorphisms around <i>APOE</i> in Alzheimer Disease. <i>Am. J. Hum. Genet.</i> 67:383–394, 2000                                                                                   | P = 0.69         | 1.47     |
| Nikolaos et al., Lower prevalence of epsilon 4 allele of apolipoprotein E gene in healthy, longer-lived individuals of hellenic origin. <i>The Journals of gerontology. Series A, Biological sciences and medical sciences</i> 2006, vol. 61, no12, pp. 1228-1231 | $\chi^2 = 5.93$  | 5.93     |

|                                                                                                                                                                                                         |                  |       |
|---------------------------------------------------------------------------------------------------------------------------------------------------------------------------------------------------------|------------------|-------|
| Gerdes et al., Apolipoprotein E polymorphism in a Danish population compared to findings in 45 other study populations around the world. <i>Genetic Epidemiology</i> Volume 9, Issue 3, Pages 155 - 167 | $\chi^2 = 9.68$  | 9.68  |
| Jiang et al., Effect of APOE polymorphisms on early responses to traumatic brain injury. <i>Neuroscience Letters</i> 408 (2006) 155–158                                                                 | $\chi^2 = 1.25$  | 1.25  |
| Abdollahi et al., Integrated Single-Label Liquid-Phase Assay of APOE Codons 112 and 158 and a Lipoprotein Study in British Women. <i>Clinical Chemistry</i> 52, No. 7, 2006 1420 - 1423                 | $\chi^2 = 5.72$  | 5.72  |
| Stakias et al., Lower prevalence of epsilon 4 allele of apolipoprotein E gene in healthy, longer-lived individuals of Hellenic origin. <i>J Gerontol A Biol Sci Med Sci</i> . 2006 Dec;61(12):1228-31   | $\chi^2 = 5.93$  | 5.93  |
| Blanché et al., A study of French centenarians: are ACE and APOE associated with longevity. <i>Comptes Rendus de l'Académie des Sciences - Series III - Sciences de la Vie</i> 324, 2, 2001, 129-135    | P = 0.28         | 3.83  |
| Kokubo et al., Age-dependent association of apolipoprotein E genotypes with stroke subtypes in a Japanese rural population. <i>Stroke</i> . 2000 Jun;31(6):1299-306                                     | $\chi^2 = 34.85$ | 34.85 |
| Luthra et al., Apolipoprotein E gene polymorphism in cerebrovascular disease: a case-control study. <i>Clin Genet</i> . 2002 Jul;62(1):39-44.                                                           | $\chi^2 = 21.44$ | 21.44 |
| Um et al., Polymorphism of angiotensin-converting enzyme, angiotensinogen, and apolipoprotein E genes in Korean patients with cerebral infarction. <i>J Mol Neurosci</i> . 2003;21(1):23-8.             | $\chi^2 = 14.09$ | 14.09 |
| Jin et al., Association of apolipoprotein E 4 polymorphism with cerebral infarction in Chinese Han population. <i>Acta Pharmacol Sin</i> . 2004 Mar;25(3):352-6                                         | $\chi^2 = 4.68$  | 4.68  |
| Lin et al., Apolipoprotein E polymorphism in ischemic cerebrovascular diseases and vascular dementia patients in Taiwan. <i>Neuroepidemiology</i> . 2004 May-Jun;23(3):129-34                           | $\chi^2 = 25.88$ | 25.88 |
| Gao X, Yang H, ZhiPing T (2006) Association studies of genetic polymorphism, environmental factors and their interaction in ischemic stroke. <i>Neurosci Lett</i> 398:172–177                           | $\chi^2 = 0.97$  | 0.97  |
| Yen et al., A positive relationship between Apo $\epsilon$ 2 allele and high-density lipoprotein cholesterol. <i>Nutrition Research</i> Volume 26, Issue 9, September 2006, Pages 443-449               | $\chi^2 = 4.83$  | 4.83  |
| Pardo Silva et al., Apolipoprotein E gene is related to mortality only in normal weight individuals: The Rotterdam study. <i>Eur J Epidemiol</i> . 2008 February; 23(2): 135–142.                       | P = 0.71         | 1.38  |
| Laws et al., APOE- $\epsilon$ 4 and APOE -491A polymorphisms in individuals with subjective memory loss. <i>Molecular Psychiatry</i> 2002, Volume 7, Number 7, Pages 768-775                            | P = 0.79         | 1.05  |
| Tai et al., Human apolipoprotein E: correlation of polymorphisms and serum lipid concentrations in Chinese. <i>Zhonghua Yi Xue Za Zhi (Taipei)</i> . 1999 Mar;62(3):133-9                               | P = 0.42         | 2.82  |
| Kaushal et al., Subarachnoid hemorrhage: tests of association with apolipoprotein E and elastin genes. <i>BMC Medical Genetics</i> 2007, 8:49                                                           | $\chi^2 = 4.41$  | 4.41  |
