# Supplementary material for: Hardy-Weinberg Equilibrium Testing of Biological Ascertainment for Mendelian Randomization Studies
Source: PubMed Central journal article supplement — Am J Epidemiol. 2009 Jan 6;169(4):505–14. doi: 10.1093/aje/kwn359 (PMC2640163; doi:10.1093/aje/kwn359), 2009-01-06
Supplement: kwn359_4.pdf [file kwn359_4.pdf]

Web Table 2. Measures of dispersion for sample sizes from 1000 to 100000 (with increments of 1000), and for allele frequencies from 0.05 to 0.95 (with increments of 0.05).  $\sigma$  and  $\mu$  are respectively the standard deviation and the mean of observed number in the sample. CI-low and CI-high are the limits of the 95% CI.

| n    | p   | q   | $\sigma$ | CI-low | CI-high | $\mu$ | $\sigma/\mu$ |
|------|-----|-----|----------|--------|---------|-------|--------------|
| 1000 | .05 | .95 | 1.58     | -3.10  | 3.10    | 50    | .0316        |
| 1000 | .10 | .90 | 3.15     | -6.17  | 6.17    | 100   | .0315        |
| 1000 | .15 | .85 | 4.69     | -9.19  | 9.19    | 150   | .0313        |
| 1000 | .20 | .80 | 6.20     | -12.15 | 12.15   | 200   | .0310        |
| 1000 | .25 | .75 | 7.65     | -15.00 | 15.00   | 250   | .0306        |
| 1000 | .30 | .70 | 9.05     | -17.74 | 17.74   | 300   | .0302        |
| 1000 | .35 | .65 | 10.37    | -20.32 | 20.32   | 350   | .0296        |
| 1000 | .40 | .60 | 11.59    | -22.72 | 22.72   | 400   | .0290        |
| 1000 | .45 | .55 | 12.71    | -24.91 | 24.91   | 450   | .0282        |
| 1000 | .50 | .50 | 13.69    | -26.84 | 26.84   | 500   | .0274        |
| 1000 | .55 | .45 | 14.53    | -28.47 | 28.47   | 550   | .0264        |
| 1000 | .60 | .40 | 15.18    | -29.75 | 29.75   | 600   | .0253        |
| 1000 | .65 | .35 | 15.62    | -30.62 | 30.62   | 650   | .0240        |
| 1000 | .70 | .30 | 15.81    | -30.98 | 30.98   | 700   | .0226        |
| 1000 | .75 | .25 | 15.69    | -30.75 | 30.75   | 750   | .0209        |
| 1000 | .80 | .20 | 15.18    | -29.75 | 29.75   | 800   | .0190        |
| 1000 | .85 | .15 | 14.16    | -27.75 | 27.75   | 850   | .0167        |
| 1000 | .90 | .10 | 12.41    | -24.32 | 24.32   | 900   | .0138        |
| 1000 | .95 | .05 | 9.38     | -18.39 | 18.39   | 950   | .0099        |
| 2000 | .05 | .95 | 2.23     | -4.38  | 4.38    | 100   | .0223        |
| 2000 | .10 | .90 | 4.45     | -8.72  | 8.72    | 200   | .0222        |
| 2000 | .15 | .85 | 6.63     | -13.00 | 13.00   | 300   | .0221        |
| 2000 | .20 | .80 | 8.76     | -17.18 | 17.18   | 400   | .0219        |
| 2000 | .25 | .75 | 10.83    | -21.22 | 21.22   | 500   | .0217        |
| 2000 | .30 | .70 | 12.80    | -25.08 | 25.08   | 600   | .0213        |
| 2000 | .35 | .65 | 14.66    | -28.74 | 28.74   | 700   | .0209        |
| 2000 | .40 | .60 | 16.40    | -32.13 | 32.13   | 800   | .0205        |
| 2000 | .45 | .55 | 17.97    | -35.22 | 35.22   | 900   | .0200        |
| 2000 | .50 | .50 | 19.36    | -37.96 | 37.96   | 1000  | .0194        |
| 2000 | .55 | .45 | 20.54    | -40.26 | 40.26   | 1100  | .0187        |
| 2000 | .60 | .40 | 21.47    | -42.07 | 42.07   | 1200  | .0179        |
| 2000 | .65 | .35 | 22.09    | -43.30 | 43.30   | 1300  | .0170        |
| 2000 | .70 | .30 | 22.36    | -43.82 | 43.82   | 1400  | .0160        |
| 2000 | .75 | .25 | 22.19    | -43.48 | 43.48   | 1500  | .0148        |
| 2000 | .80 | .20 | 21.47    | -42.07 | 42.07   | 1600  | .0134        |
| 2000 | .85 | .15 | 20.02    | -39.25 | 39.25   | 1700  | .0118        |
| 2000 | .90 | .10 | 17.54    | -34.39 | 34.39   | 1800  | .0097        |
| 2000 | .95 | .05 | 13.27    | -26.00 | 26.00   | 1900  | .0070        |
| 3000 | .05 | .95 | 2.74     | -5.36  | 5.36    | 150   | .0182        |
| 3000 | .10 | .90 | 5.45     | -10.68 | 10.68   | 300   | .0182        |
| 3000 | .15 | .85 | 8.12     | -15.92 | 15.92   | 450   | .0181        |
| 3000 | .20 | .80 | 10.73    | -21.04 | 21.04   | 600   | .0179        |

|      |     |     |       |        |       |      |       |
|------|-----|-----|-------|--------|-------|------|-------|
| 3000 | .25 | .75 | 13.26 | -25.99 | 25.99 | 750  | .0177 |
| 3000 | .30 | .70 | 15.67 | -30.72 | 30.72 | 900  | .0174 |
| 3000 | .35 | .65 | 17.96 | -35.20 | 35.20 | 1050 | .0171 |
| 3000 | .40 | .60 | 20.08 | -39.36 | 39.36 | 1200 | .0167 |
| 3000 | .45 | .55 | 22.01 | -43.14 | 43.14 | 1350 | .0163 |
| 3000 | .50 | .50 | 23.72 | -46.49 | 46.49 | 1500 | .0158 |
| 3000 | .55 | .45 | 25.16 | -49.31 | 49.31 | 1650 | .0152 |
| 3000 | .60 | .40 | 26.29 | -51.53 | 51.53 | 1800 | .0146 |
| 3000 | .65 | .35 | 27.06 | -53.03 | 53.03 | 1950 | .0139 |
| 3000 | .70 | .30 | 27.38 | -53.67 | 53.67 | 2100 | .0130 |
| 3000 | .75 | .25 | 27.17 | -53.26 | 53.26 | 2250 | .0121 |
| 3000 | .80 | .20 | 26.29 | -51.53 | 51.53 | 2400 | .0110 |
| 3000 | .85 | .15 | 24.53 | -48.07 | 48.07 | 2550 | .0096 |
| 3000 | .90 | .10 | 21.49 | -42.11 | 42.11 | 2700 | .0080 |
| 3000 | .95 | .05 | 16.25 | -31.85 | 31.85 | 2850 | .0057 |
| 4000 | .05 | .95 | 3.16  | -6.19  | 6.19  | 200  | .0158 |
| 4000 | .10 | .90 | 6.29  | -12.33 | 12.33 | 400  | .0157 |
| 4000 | .15 | .85 | 9.38  | -18.38 | 18.38 | 600  | .0156 |
| 4000 | .20 | .80 | 12.39 | -24.29 | 24.29 | 800  | .0155 |
| 4000 | .25 | .75 | 15.31 | -30.01 | 30.01 | 1000 | .0153 |
| 4000 | .30 | .70 | 18.10 | -35.48 | 35.48 | 1200 | .0151 |
| 4000 | .35 | .65 | 20.74 | -40.64 | 40.64 | 1400 | .0148 |
| 4000 | .40 | .60 | 23.19 | -45.44 | 45.44 | 1600 | .0145 |
| 4000 | .45 | .55 | 25.42 | -49.82 | 49.82 | 1800 | .0141 |
| 4000 | .50 | .50 | 27.39 | -53.68 | 53.68 | 2000 | .0137 |
| 4000 | .55 | .45 | 29.05 | -56.94 | 56.94 | 2200 | .0132 |
| 4000 | .60 | .40 | 30.36 | -59.50 | 59.50 | 2400 | .0126 |
| 4000 | .65 | .35 | 31.24 | -61.23 | 61.23 | 2600 | .0120 |
| 4000 | .70 | .30 | 31.62 | -61.97 | 61.97 | 2800 | .0113 |
| 4000 | .75 | .25 | 31.37 | -61.49 | 61.49 | 3000 | .0105 |
| 4000 | .80 | .20 | 30.36 | -59.50 | 59.50 | 3200 | .0095 |
| 4000 | .85 | .15 | 28.32 | -55.51 | 55.51 | 3400 | .0083 |
| 4000 | .90 | .10 | 24.81 | -48.63 | 48.63 | 3600 | .0069 |
| 4000 | .95 | .05 | 18.76 | -36.77 | 36.77 | 3800 | .0049 |
| 5000 | .05 | .95 | 3.53  | -6.92  | 6.92  | 250  | .0141 |
| 5000 | .10 | .90 | 7.04  | -13.79 | 13.79 | 500  | .0141 |
| 5000 | .15 | .85 | 10.49 | -20.55 | 20.55 | 750  | .0140 |
| 5000 | .20 | .80 | 13.86 | -27.16 | 27.16 | 1000 | .0139 |
| 5000 | .25 | .75 | 17.12 | -33.55 | 33.55 | 1250 | .0137 |
| 5000 | .30 | .70 | 20.24 | -39.66 | 39.66 | 1500 | .0135 |
| 5000 | .35 | .65 | 23.18 | -45.44 | 45.44 | 1750 | .0132 |
| 5000 | .40 | .60 | 25.92 | -50.81 | 50.81 | 2000 | .0130 |
| 5000 | .45 | .55 | 28.42 | -55.70 | 55.70 | 2250 | .0126 |
| 5000 | .50 | .50 | 30.62 | -60.01 | 60.01 | 2500 | .0122 |
| 5000 | .55 | .45 | 32.48 | -63.66 | 63.66 | 2750 | .0118 |
| 5000 | .60 | .40 | 33.94 | -66.52 | 66.52 | 3000 | .0113 |
| 5000 | .65 | .35 | 34.93 | -68.46 | 68.46 | 3250 | .0107 |
| 5000 | .70 | .30 | 35.35 | -69.28 | 69.28 | 3500 | .0101 |

|      |     |     |       |        |       |      |       |
|------|-----|-----|-------|--------|-------|------|-------|
| 5000 | .75 | .25 | 35.08 | -68.75 | 68.75 | 3750 | .0094 |
| 5000 | .80 | .20 | 33.94 | -66.52 | 66.52 | 4000 | .0085 |
| 5000 | .85 | .15 | 31.66 | -62.06 | 62.06 | 4250 | .0074 |
| 5000 | .90 | .10 | 27.74 | -54.37 | 54.37 | 4500 | .0062 |
| 5000 | .95 | .05 | 20.98 | -41.11 | 41.11 | 4750 | .0044 |
| 6000 | .05 | .95 | 3.87  | -7.58  | 7.58  | 300  | .0129 |
| 6000 | .10 | .90 | 7.71  | -15.11 | 15.11 | 600  | .0128 |
| 6000 | .15 | .85 | 11.49 | -22.52 | 22.52 | 900  | .0128 |
| 6000 | .20 | .80 | 15.18 | -29.75 | 29.75 | 1200 | .0126 |
| 6000 | .25 | .75 | 18.75 | -36.75 | 36.75 | 1500 | .0125 |
| 6000 | .30 | .70 | 22.17 | -43.45 | 43.45 | 1800 | .0123 |
| 6000 | .35 | .65 | 25.40 | -49.78 | 49.78 | 2100 | .0121 |
| 6000 | .40 | .60 | 28.40 | -55.66 | 55.66 | 2400 | .0118 |
| 6000 | .45 | .55 | 31.13 | -61.01 | 61.01 | 2700 | .0115 |
| 6000 | .50 | .50 | 33.54 | -65.74 | 65.74 | 3000 | .0112 |
| 6000 | .55 | .45 | 35.58 | -69.74 | 69.74 | 3300 | .0108 |
| 6000 | .60 | .40 | 37.18 | -72.87 | 72.87 | 3600 | .0103 |
| 6000 | .65 | .35 | 38.26 | -74.99 | 74.99 | 3900 | .0098 |
| 6000 | .70 | .30 | 38.72 | -75.90 | 75.90 | 4200 | .0092 |
| 6000 | .75 | .25 | 38.43 | -75.32 | 75.32 | 4500 | .0085 |
| 6000 | .80 | .20 | 37.18 | -72.87 | 72.87 | 4800 | .0077 |
| 6000 | .85 | .15 | 34.68 | -67.98 | 67.98 | 5100 | .0068 |
| 6000 | .90 | .10 | 30.39 | -59.56 | 59.56 | 5400 | .0056 |
| 6000 | .95 | .05 | 22.98 | -45.04 | 45.04 | 5700 | .0040 |
| 7000 | .05 | .95 | 4.18  | -8.19  | 8.19  | 350  | .0119 |
| 7000 | .10 | .90 | 8.32  | -16.32 | 16.32 | 700  | .0119 |
| 7000 | .15 | .85 | 12.41 | -24.32 | 24.32 | 1050 | .0118 |
| 7000 | .20 | .80 | 16.40 | -32.13 | 32.13 | 1400 | .0117 |
| 7000 | .25 | .75 | 20.25 | -39.69 | 39.69 | 1750 | .0116 |
| 7000 | .30 | .70 | 23.94 | -46.93 | 46.93 | 2100 | .0114 |
| 7000 | .35 | .65 | 27.43 | -53.76 | 53.76 | 2450 | .0112 |
| 7000 | .40 | .60 | 30.67 | -60.12 | 60.12 | 2800 | .0110 |
| 7000 | .45 | .55 | 33.62 | -65.90 | 65.90 | 3150 | .0107 |
| 7000 | .50 | .50 | 36.23 | -71.01 | 71.01 | 3500 | .0104 |
| 7000 | .55 | .45 | 38.43 | -75.33 | 75.33 | 3850 | .0100 |
| 7000 | .60 | .40 | 40.16 | -78.71 | 78.71 | 4200 | .0096 |
| 7000 | .65 | .35 | 41.33 | -81.00 | 81.00 | 4550 | .0091 |
| 7000 | .70 | .30 | 41.82 | -81.98 | 81.98 | 4900 | .0085 |
| 7000 | .75 | .25 | 41.50 | -81.35 | 81.35 | 5250 | .0079 |
| 7000 | .80 | .20 | 40.16 | -78.71 | 78.71 | 5600 | .0072 |
| 7000 | .85 | .15 | 37.46 | -73.43 | 73.43 | 5950 | .0063 |
| 7000 | .90 | .10 | 32.82 | -64.33 | 64.33 | 6300 | .0052 |
| 7000 | .95 | .05 | 24.82 | -48.64 | 48.64 | 6650 | .0037 |
| 8000 | .05 | .95 | 4.47  | -8.75  | 8.75  | 400  | .0112 |
| 8000 | .10 | .90 | 8.90  | -17.44 | 17.44 | 800  | .0111 |
| 8000 | .15 | .85 | 13.26 | -26.00 | 26.00 | 1200 | .0111 |
| 8000 | .20 | .80 | 17.53 | -34.35 | 34.35 | 1600 | .0110 |
| 8000 | .25 | .75 | 21.65 | -42.44 | 42.44 | 2000 | .0108 |

|       |     |     |       |        |       |      |       |
|-------|-----|-----|-------|--------|-------|------|-------|
| 8000  | .30 | .70 | 25.60 | -50.17 | 50.17 | 2400 | .0107 |
| 8000  | .35 | .65 | 29.32 | -57.48 | 57.48 | 2800 | .0105 |
| 8000  | .40 | .60 | 32.79 | -64.27 | 64.27 | 3200 | .0102 |
| 8000  | .45 | .55 | 35.94 | -70.45 | 70.45 | 3600 | .0100 |
| 8000  | .50 | .50 | 38.73 | -75.91 | 75.91 | 4000 | .0097 |
| 8000  | .55 | .45 | 41.08 | -80.53 | 80.53 | 4400 | .0093 |
| 8000  | .60 | .40 | 42.93 | -84.15 | 84.15 | 4800 | .0089 |
| 8000  | .65 | .35 | 44.18 | -86.59 | 86.59 | 5200 | .0085 |
| 8000  | .70 | .30 | 44.71 | -87.64 | 87.64 | 5600 | .0080 |
| 8000  | .75 | .25 | 44.37 | -86.97 | 86.97 | 6000 | .0074 |
| 8000  | .80 | .20 | 42.93 | -84.15 | 84.15 | 6400 | .0067 |
| 8000  | .85 | .15 | 40.05 | -78.50 | 78.50 | 6800 | .0059 |
| 8000  | .90 | .10 | 35.09 | -68.77 | 68.77 | 7200 | .0049 |
| 8000  | .95 | .05 | 26.53 | -52.00 | 52.00 | 7600 | .0035 |
| 9000  | .05 | .95 | 4.74  | -9.29  | 9.29  | 450  | .0105 |
| 9000  | .10 | .90 | 9.44  | -18.50 | 18.50 | 900  | .0105 |
| 9000  | .15 | .85 | 14.07 | -27.58 | 27.58 | 1350 | .0104 |
| 9000  | .20 | .80 | 18.59 | -36.44 | 36.44 | 1800 | .0103 |
| 9000  | .25 | .75 | 22.96 | -45.01 | 45.01 | 2250 | .0102 |
| 9000  | .30 | .70 | 27.15 | -53.21 | 53.21 | 2700 | .0101 |
| 9000  | .35 | .65 | 31.10 | -60.96 | 60.96 | 3150 | .0099 |
| 9000  | .40 | .60 | 34.78 | -68.17 | 68.17 | 3600 | .0097 |
| 9000  | .45 | .55 | 38.12 | -74.72 | 74.72 | 4050 | .0094 |
| 9000  | .50 | .50 | 41.08 | -80.52 | 80.52 | 4500 | .0091 |
| 9000  | .55 | .45 | 43.58 | -85.41 | 85.41 | 4950 | .0088 |
| 9000  | .60 | .40 | 45.54 | -89.25 | 89.25 | 5400 | .0084 |
| 9000  | .65 | .35 | 46.86 | -91.85 | 91.85 | 5850 | .0080 |
| 9000  | .70 | .30 | 47.42 | -92.95 | 92.95 | 6300 | .0075 |
| 9000  | .75 | .25 | 47.06 | -92.24 | 92.24 | 6750 | .0070 |
| 9000  | .80 | .20 | 45.54 | -89.25 | 89.25 | 7200 | .0063 |
| 9000  | .85 | .15 | 42.48 | -83.26 | 83.26 | 7650 | .0056 |
| 9000  | .90 | .10 | 37.22 | -72.95 | 72.95 | 8100 | .0046 |
| 9000  | .95 | .05 | 28.14 | -55.16 | 55.16 | 8550 | .0033 |
| 10000 | .05 | .95 | 4.99  | -9.79  | 9.79  | 500  | .0100 |
| 10000 | .10 | .90 | 9.95  | -19.50 | 19.50 | 1000 | .0099 |
| 10000 | .15 | .85 | 14.83 | -29.07 | 29.07 | 1500 | .0099 |
| 10000 | .20 | .80 | 19.60 | -38.41 | 38.41 | 2000 | .0098 |
| 10000 | .25 | .75 | 24.21 | -47.44 | 47.44 | 2500 | .0097 |
| 10000 | .30 | .70 | 28.62 | -56.09 | 56.09 | 3000 | .0095 |
| 10000 | .35 | .65 | 32.79 | -64.26 | 64.26 | 3500 | .0094 |
| 10000 | .40 | .60 | 36.66 | -71.85 | 71.85 | 4000 | .0092 |
| 10000 | .45 | .55 | 40.19 | -78.77 | 78.77 | 4500 | .0089 |
| 10000 | .50 | .50 | 43.30 | -84.87 | 84.87 | 5000 | .0087 |
| 10000 | .55 | .45 | 45.93 | -90.03 | 90.03 | 5500 | .0084 |
| 10000 | .60 | .40 | 48.00 | -94.08 | 94.08 | 6000 | .0080 |
| 10000 | .65 | .35 | 49.40 | -96.82 | 96.82 | 6500 | .0076 |
| 10000 | .70 | .30 | 49.99 | -97.98 | 97.98 | 7000 | .0071 |
| 10000 | .75 | .25 | 49.61 | -97.23 | 97.23 | 7500 | .0066 |

|       |     |     |       |         |        |       |       |
|-------|-----|-----|-------|---------|--------|-------|-------|
| 10000 | .80 | .20 | 48.00 | -94.08  | 94.08  | 8000  | .0060 |
| 10000 | .85 | .15 | 44.78 | -87.76  | 87.76  | 8500  | .0053 |
| 10000 | .90 | .10 | 39.23 | -76.89  | 76.89  | 9000  | .0044 |
| 10000 | .95 | .05 | 29.66 | -58.14  | 58.14  | 9500  | .0031 |
| 11000 | .05 | .95 | 5.24  | -10.27  | 10.27  | 550   | .0095 |
| 11000 | .10 | .90 | 10.44 | -20.45  | 20.45  | 1100  | .0095 |
| 11000 | .15 | .85 | 15.55 | -30.49  | 30.49  | 1650  | .0094 |
| 11000 | .20 | .80 | 20.55 | -40.28  | 40.28  | 2200  | .0093 |
| 11000 | .25 | .75 | 25.39 | -49.76  | 49.76  | 2750  | .0092 |
| 11000 | .30 | .70 | 30.01 | -58.83  | 58.83  | 3300  | .0091 |
| 11000 | .35 | .65 | 34.39 | -67.40  | 67.40  | 3850  | .0089 |
| 11000 | .40 | .60 | 38.45 | -75.36  | 75.36  | 4400  | .0087 |
| 11000 | .45 | .55 | 42.15 | -82.61  | 82.61  | 4950  | .0085 |
| 11000 | .50 | .50 | 45.41 | -89.01  | 89.01  | 5500  | .0083 |
| 11000 | .55 | .45 | 48.18 | -94.43  | 94.43  | 6050  | .0080 |
| 11000 | .60 | .40 | 50.34 | -98.67  | 98.67  | 6600  | .0076 |
| 11000 | .65 | .35 | 51.81 | -101.54 | 101.54 | 7150  | .0072 |
| 11000 | .70 | .30 | 52.43 | -102.76 | 102.76 | 7700  | .0068 |
| 11000 | .75 | .25 | 52.03 | -101.98 | 101.98 | 8250  | .0063 |
| 11000 | .80 | .20 | 50.34 | -98.67  | 98.67  | 8800  | .0057 |
| 11000 | .85 | .15 | 46.96 | -92.05  | 92.05  | 9350  | .0050 |
| 11000 | .90 | .10 | 41.14 | -80.64  | 80.64  | 9900  | .0042 |
| 11000 | .95 | .05 | 31.11 | -60.98  | 60.98  | 10450 | .0030 |
| 12000 | .05 | .95 | 5.47  | -10.72  | 10.72  | 600   | .0091 |
| 12000 | .10 | .90 | 10.90 | -21.36  | 21.36  | 1200  | .0091 |
| 12000 | .15 | .85 | 16.25 | -31.84  | 31.84  | 1800  | .0090 |
| 12000 | .20 | .80 | 21.47 | -42.07  | 42.07  | 2400  | .0089 |
| 12000 | .25 | .75 | 26.52 | -51.97  | 51.97  | 3000  | .0088 |
| 12000 | .30 | .70 | 31.35 | -61.45  | 61.45  | 3600  | .0087 |
| 12000 | .35 | .65 | 35.92 | -70.39  | 70.39  | 4200  | .0086 |
| 12000 | .40 | .60 | 40.16 | -78.71  | 78.71  | 4800  | .0084 |
| 12000 | .45 | .55 | 44.02 | -86.28  | 86.28  | 5400  | .0082 |
| 12000 | .50 | .50 | 47.43 | -92.97  | 92.97  | 6000  | .0079 |
| 12000 | .55 | .45 | 50.32 | -98.62  | 98.62  | 6600  | .0076 |
| 12000 | .60 | .40 | 52.58 | -103.06 | 103.06 | 7200  | .0073 |
| 12000 | .65 | .35 | 54.11 | -106.06 | 106.06 | 7800  | .0069 |
| 12000 | .70 | .30 | 54.76 | -107.33 | 107.33 | 8400  | .0065 |
| 12000 | .75 | .25 | 54.34 | -106.51 | 106.51 | 9000  | .0060 |
| 12000 | .80 | .20 | 52.58 | -103.06 | 103.06 | 9600  | .0055 |
| 12000 | .85 | .15 | 49.05 | -96.14  | 96.14  | 10200 | .0048 |
| 12000 | .90 | .10 | 42.97 | -84.23  | 84.23  | 10800 | .0040 |
| 12000 | .95 | .05 | 32.49 | -63.69  | 63.69  | 11400 | .0029 |
| 13000 | .05 | .95 | 5.69  | -11.16  | 11.16  | 650   | .0088 |
| 13000 | .10 | .90 | 11.34 | -22.24  | 22.24  | 1300  | .0087 |
| 13000 | .15 | .85 | 16.91 | -33.14  | 33.14  | 1950  | .0087 |
| 13000 | .20 | .80 | 22.34 | -43.79  | 43.79  | 2600  | .0086 |
| 13000 | .25 | .75 | 27.60 | -54.09  | 54.09  | 3250  | .0085 |
| 13000 | .30 | .70 | 32.63 | -63.95  | 63.95  | 3900  | .0084 |

|       |     |     |       |         |        |       |       |
|-------|-----|-----|-------|---------|--------|-------|-------|
| 13000 | .35 | .65 | 37.38 | -73.27  | 73.27  | 4550  | .0082 |
| 13000 | .40 | .60 | 41.80 | -81.93  | 81.93  | 5200  | .0080 |
| 13000 | .45 | .55 | 45.82 | -89.81  | 89.81  | 5850  | .0078 |
| 13000 | .50 | .50 | 49.37 | -96.77  | 96.77  | 6500  | .0076 |
| 13000 | .55 | .45 | 52.37 | -102.65 | 102.65 | 7150  | .0073 |
| 13000 | .60 | .40 | 54.73 | -107.27 | 107.27 | 7800  | .0070 |
| 13000 | .65 | .35 | 56.32 | -110.39 | 110.39 | 8450  | .0067 |
| 13000 | .70 | .30 | 57.00 | -111.71 | 111.71 | 9100  | .0063 |
| 13000 | .75 | .25 | 56.56 | -110.86 | 110.86 | 9750  | .0058 |
| 13000 | .80 | .20 | 54.73 | -107.27 | 107.27 | 10400 | .0053 |
| 13000 | .85 | .15 | 51.05 | -100.06 | 100.06 | 11050 | .0046 |
| 13000 | .90 | .10 | 44.73 | -87.67  | 87.67  | 11700 | .0038 |
| 13000 | .95 | .05 | 33.82 | -66.29  | 66.29  | 12350 | .0027 |
| 14000 | .05 | .95 | 5.91  | -11.58  | 11.58  | 700   | .0084 |
| 14000 | .10 | .90 | 11.77 | -23.07  | 23.07  | 1400  | .0084 |
| 14000 | .15 | .85 | 17.55 | -34.39  | 34.39  | 2100  | .0084 |
| 14000 | .20 | .80 | 23.19 | -45.44  | 45.44  | 2800  | .0083 |
| 14000 | .25 | .75 | 28.64 | -56.14  | 56.14  | 3500  | .0082 |
| 14000 | .30 | .70 | 33.86 | -66.37  | 66.37  | 4200  | .0081 |
| 14000 | .35 | .65 | 38.79 | -76.03  | 76.03  | 4900  | .0079 |
| 14000 | .40 | .60 | 43.38 | -85.02  | 85.02  | 5600  | .0077 |
| 14000 | .45 | .55 | 47.55 | -93.20  | 93.20  | 6300  | .0075 |
| 14000 | .50 | .50 | 51.23 | -100.42 | 100.42 | 7000  | .0073 |
| 14000 | .55 | .45 | 54.35 | -106.53 | 106.53 | 7700  | .0071 |
| 14000 | .60 | .40 | 56.79 | -111.32 | 111.32 | 8400  | .0068 |
| 14000 | .65 | .35 | 58.45 | -114.55 | 114.55 | 9100  | .0064 |
| 14000 | .70 | .30 | 59.15 | -115.93 | 115.93 | 9800  | .0060 |
| 14000 | .75 | .25 | 58.70 | -115.05 | 115.05 | 10500 | .0056 |
| 14000 | .80 | .20 | 56.79 | -111.32 | 111.32 | 11200 | .0051 |
| 14000 | .85 | .15 | 52.98 | -103.84 | 103.84 | 11900 | .0045 |
| 14000 | .90 | .10 | 46.42 | -90.98  | 90.98  | 12600 | .0037 |
| 14000 | .95 | .05 | 35.10 | -68.79  | 68.79  | 13300 | .0026 |
| 15000 | .05 | .95 | 6.12  | -11.99  | 11.99  | 750   | .0082 |
| 15000 | .10 | .90 | 12.19 | -23.88  | 23.88  | 1500  | .0081 |
| 15000 | .15 | .85 | 18.16 | -35.60  | 35.60  | 2250  | .0081 |
| 15000 | .20 | .80 | 24.00 | -47.04  | 47.04  | 3000  | .0080 |
| 15000 | .25 | .75 | 29.65 | -58.11  | 58.11  | 3750  | .0079 |
| 15000 | .30 | .70 | 35.05 | -68.70  | 68.70  | 4500  | .0078 |
| 15000 | .35 | .65 | 40.15 | -78.70  | 78.70  | 5250  | .0076 |
| 15000 | .40 | .60 | 44.90 | -88.00  | 88.00  | 6000  | .0075 |
| 15000 | .45 | .55 | 49.22 | -96.47  | 96.47  | 6750  | .0073 |
| 15000 | .50 | .50 | 53.03 | -103.94 | 103.94 | 7500  | .0071 |
| 15000 | .55 | .45 | 56.26 | -110.26 | 110.26 | 8250  | .0068 |
| 15000 | .60 | .40 | 58.79 | -115.22 | 115.22 | 9000  | .0065 |
| 15000 | .65 | .35 | 60.50 | -118.57 | 118.57 | 9750  | .0062 |
| 15000 | .70 | .30 | 61.22 | -120.00 | 120.00 | 10500 | .0058 |
| 15000 | .75 | .25 | 60.76 | -119.08 | 119.08 | 11250 | .0054 |
| 15000 | .80 | .20 | 58.79 | -115.22 | 115.22 | 12000 | .0049 |

|       |     |     |       |         |        |       |       |
|-------|-----|-----|-------|---------|--------|-------|-------|
| 15000 | .85 | .15 | 54.84 | -107.49 | 107.49 | 12750 | .0043 |
| 15000 | .90 | .10 | 48.05 | -94.17  | 94.17  | 13500 | .0036 |
| 15000 | .95 | .05 | 36.33 | -71.21  | 71.21  | 14250 | .0025 |
| 16000 | .05 | .95 | 6.32  | -12.38  | 12.38  | 800   | .0079 |
| 16000 | .10 | .90 | 12.59 | -24.67  | 24.67  | 1600  | .0079 |
| 16000 | .15 | .85 | 18.76 | -36.77  | 36.77  | 2400  | .0078 |
| 16000 | .20 | .80 | 24.79 | -48.58  | 48.58  | 3200  | .0077 |
| 16000 | .25 | .75 | 30.62 | -60.01  | 60.01  | 4000  | .0077 |
| 16000 | .30 | .70 | 36.20 | -70.95  | 70.95  | 4800  | .0075 |
| 16000 | .35 | .65 | 41.47 | -81.28  | 81.28  | 5600  | .0074 |
| 16000 | .40 | .60 | 46.37 | -90.89  | 90.89  | 6400  | .0072 |
| 16000 | .45 | .55 | 50.83 | -99.63  | 99.63  | 7200  | .0071 |
| 16000 | .50 | .50 | 54.77 | -107.35 | 107.35 | 8000  | .0068 |
| 16000 | .55 | .45 | 58.10 | -113.88 | 113.88 | 8800  | .0066 |
| 16000 | .60 | .40 | 60.72 | -119.00 | 119.00 | 9600  | .0063 |
| 16000 | .65 | .35 | 62.48 | -122.46 | 122.46 | 10400 | .0060 |
| 16000 | .70 | .30 | 63.23 | -123.94 | 123.94 | 11200 | .0056 |
| 16000 | .75 | .25 | 62.75 | -122.99 | 122.99 | 12000 | .0052 |
| 16000 | .80 | .20 | 60.72 | -119.00 | 119.00 | 12800 | .0047 |
| 16000 | .85 | .15 | 56.64 | -111.01 | 111.01 | 13600 | .0042 |
| 16000 | .90 | .10 | 49.62 | -97.26  | 97.26  | 14400 | .0034 |
| 16000 | .95 | .05 | 37.52 | -73.54  | 73.54  | 15200 | .0025 |
| 17000 | .05 | .95 | 6.51  | -12.76  | 12.76  | 850   | .0077 |
| 17000 | .10 | .90 | 12.97 | -25.43  | 25.43  | 1700  | .0076 |
| 17000 | .15 | .85 | 19.34 | -37.90  | 37.90  | 2550  | .0076 |
| 17000 | .20 | .80 | 25.55 | -50.08  | 50.08  | 3400  | .0075 |
| 17000 | .25 | .75 | 31.56 | -61.86  | 61.86  | 4250  | .0074 |
| 17000 | .30 | .70 | 37.31 | -73.13  | 73.13  | 5100  | .0073 |
| 17000 | .35 | .65 | 42.75 | -83.79  | 83.79  | 5950  | .0072 |
| 17000 | .40 | .60 | 47.80 | -93.69  | 93.69  | 6800  | .0070 |
| 17000 | .45 | .55 | 52.40 | -102.70 | 102.70 | 7650  | .0068 |
| 17000 | .50 | .50 | 56.46 | -110.66 | 110.66 | 8500  | .0066 |
| 17000 | .55 | .45 | 59.89 | -117.39 | 117.39 | 9350  | .0064 |
| 17000 | .60 | .40 | 62.58 | -122.67 | 122.67 | 10200 | .0061 |
| 17000 | .65 | .35 | 64.40 | -126.23 | 126.23 | 11050 | .0058 |
| 17000 | .70 | .30 | 65.18 | -127.75 | 127.75 | 11900 | .0055 |
| 17000 | .75 | .25 | 64.68 | -126.77 | 126.77 | 12750 | .0051 |
| 17000 | .80 | .20 | 62.58 | -122.67 | 122.67 | 13600 | .0046 |
| 17000 | .85 | .15 | 58.38 | -114.43 | 114.43 | 14450 | .0040 |
| 17000 | .90 | .10 | 51.15 | -100.25 | 100.25 | 15300 | .0033 |
| 17000 | .95 | .05 | 38.68 | -75.81  | 75.81  | 16150 | .0024 |
| 18000 | .05 | .95 | 6.70  | -13.13  | 13.13  | 900   | .0074 |
| 18000 | .10 | .90 | 13.35 | -26.16  | 26.16  | 1800  | .0074 |
| 18000 | .15 | .85 | 19.90 | -39.00  | 39.00  | 2700  | .0074 |
| 18000 | .20 | .80 | 26.29 | -51.53  | 51.53  | 3600  | .0073 |
| 18000 | .25 | .75 | 32.48 | -63.65  | 63.65  | 4500  | .0072 |
| 18000 | .30 | .70 | 38.40 | -75.25  | 75.25  | 5400  | .0071 |
| 18000 | .35 | .65 | 43.99 | -86.22  | 86.22  | 6300  | .0070 |

|       |     |     |       |         |        |       |       |
|-------|-----|-----|-------|---------|--------|-------|-------|
| 18000 | .40 | .60 | 49.19 | -96.40  | 96.40  | 7200  | .0068 |
| 18000 | .45 | .55 | 53.92 | -105.67 | 105.67 | 8100  | .0067 |
| 18000 | .50 | .50 | 58.09 | -113.87 | 113.87 | 9000  | .0065 |
| 18000 | .55 | .45 | 61.63 | -120.79 | 120.79 | 9900  | .0062 |
| 18000 | .60 | .40 | 64.40 | -126.22 | 126.22 | 10800 | .0060 |
| 18000 | .65 | .35 | 66.27 | -129.89 | 129.89 | 11700 | .0057 |
| 18000 | .70 | .30 | 67.07 | -131.45 | 131.45 | 12600 | .0053 |
| 18000 | .75 | .25 | 66.56 | -130.45 | 130.45 | 13500 | .0049 |
| 18000 | .80 | .20 | 64.40 | -126.22 | 126.22 | 14400 | .0045 |
| 18000 | .85 | .15 | 60.07 | -117.75 | 117.75 | 15300 | .0039 |
| 18000 | .90 | .10 | 52.63 | -103.16 | 103.16 | 16200 | .0032 |
| 18000 | .95 | .05 | 39.80 | -78.00  | 78.00  | 17100 | .0023 |
| 19000 | .05 | .95 | 6.88  | -13.49  | 13.49  | 950   | .0072 |
| 19000 | .10 | .90 | 13.71 | -26.88  | 26.88  | 1900  | .0072 |
| 19000 | .15 | .85 | 20.44 | -40.07  | 40.07  | 2850  | .0072 |
| 19000 | .20 | .80 | 27.01 | -52.94  | 52.94  | 3800  | .0071 |
| 19000 | .25 | .75 | 33.37 | -65.40  | 65.40  | 4750  | .0070 |
| 19000 | .30 | .70 | 39.45 | -77.32  | 77.32  | 5700  | .0069 |
| 19000 | .35 | .65 | 45.19 | -88.58  | 88.58  | 6650  | .0068 |
| 19000 | .40 | .60 | 50.53 | -99.04  | 99.04  | 7600  | .0066 |
| 19000 | .45 | .55 | 55.39 | -108.57 | 108.57 | 8550  | .0065 |
| 19000 | .50 | .50 | 59.69 | -116.99 | 116.99 | 9500  | .0063 |
| 19000 | .55 | .45 | 63.32 | -124.10 | 124.10 | 10450 | .0061 |
| 19000 | .60 | .40 | 66.16 | -129.68 | 129.68 | 11400 | .0058 |
| 19000 | .65 | .35 | 68.09 | -133.45 | 133.45 | 12350 | .0055 |
| 19000 | .70 | .30 | 68.91 | -135.06 | 135.06 | 13300 | .0052 |
| 19000 | .75 | .25 | 68.38 | -134.02 | 134.02 | 14250 | .0048 |
| 19000 | .80 | .20 | 66.16 | -129.68 | 129.68 | 15200 | .0044 |
| 19000 | .85 | .15 | 61.72 | -120.97 | 120.97 | 16150 | .0038 |
| 19000 | .90 | .10 | 54.07 | -105.99 | 105.99 | 17100 | .0032 |
| 19000 | .95 | .05 | 40.89 | -80.14  | 80.14  | 18050 | .0023 |
| 20000 | .05 | .95 | 7.06  | -13.84  | 13.84  | 1000  | .0071 |
| 20000 | .10 | .90 | 14.07 | -27.58  | 27.58  | 2000  | .0070 |
| 20000 | .15 | .85 | 20.97 | -41.11  | 41.11  | 3000  | .0070 |
| 20000 | .20 | .80 | 27.71 | -54.32  | 54.32  | 4000  | .0069 |
| 20000 | .25 | .75 | 34.23 | -67.10  | 67.10  | 5000  | .0068 |
| 20000 | .30 | .70 | 40.47 | -79.33  | 79.33  | 6000  | .0067 |
| 20000 | .35 | .65 | 46.37 | -90.88  | 90.88  | 7000  | .0066 |
| 20000 | .40 | .60 | 51.85 | -101.62 | 101.62 | 8000  | .0065 |
| 20000 | .45 | .55 | 56.83 | -111.39 | 111.39 | 9000  | .0063 |
| 20000 | .50 | .50 | 61.24 | -120.02 | 120.02 | 10000 | .0061 |
| 20000 | .55 | .45 | 64.96 | -127.32 | 127.32 | 11000 | .0059 |
| 20000 | .60 | .40 | 67.88 | -133.05 | 133.05 | 12000 | .0057 |
| 20000 | .65 | .35 | 69.86 | -136.92 | 136.92 | 13000 | .0054 |
| 20000 | .70 | .30 | 70.70 | -138.57 | 138.57 | 14000 | .0050 |
| 20000 | .75 | .25 | 70.16 | -137.51 | 137.51 | 15000 | .0047 |
| 20000 | .80 | .20 | 67.88 | -133.05 | 133.05 | 16000 | .0042 |
| 20000 | .85 | .15 | 63.32 | -124.11 | 124.11 | 17000 | .0037 |



|       |     |     |       |         |        |       |       |
|-------|-----|-----|-------|---------|--------|-------|-------|
| 20000 | .90 | .10 | 55.48 | -108.74 | 108.74 | 18000 | .0031 |
| 20000 | .95 | .05 | 41.95 | -82.22  | 82.22  | 19000 | .0022 |
| 21000 | .05 | .95 | 7.24  | -14.18  | 14.18  | 1050  | .0069 |
| 21000 | .10 | .90 | 14.42 | -28.26  | 28.26  | 2100  | .0069 |
| 21000 | .15 | .85 | 21.49 | -42.12  | 42.12  | 3150  | .0068 |
| 21000 | .20 | .80 | 28.40 | -55.66  | 55.66  | 4200  | .0068 |
| 21000 | .25 | .75 | 35.08 | -68.75  | 68.75  | 5250  | .0067 |
| 21000 | .30 | .70 | 41.47 | -81.28  | 81.28  | 6300  | .0066 |
| 21000 | .35 | .65 | 47.51 | -93.12  | 93.12  | 7350  | .0065 |
| 21000 | .40 | .60 | 53.13 | -104.13 | 104.13 | 8400  | .0063 |
| 21000 | .45 | .55 | 58.24 | -114.14 | 114.14 | 9450  | .0062 |
| 21000 | .50 | .50 | 62.75 | -122.99 | 122.99 | 10500 | .0060 |
| 21000 | .55 | .45 | 66.56 | -130.47 | 130.47 | 11550 | .0058 |
| 21000 | .60 | .40 | 69.56 | -136.33 | 136.33 | 12600 | .0055 |
| 21000 | .65 | .35 | 71.58 | -140.30 | 140.30 | 13650 | .0052 |
| 21000 | .70 | .30 | 72.44 | -141.99 | 141.99 | 14700 | .0049 |
| 21000 | .75 | .25 | 71.89 | -140.90 | 140.90 | 15750 | .0046 |
| 21000 | .80 | .20 | 69.56 | -136.33 | 136.33 | 16800 | .0041 |
| 21000 | .85 | .15 | 64.89 | -127.18 | 127.18 | 17850 | .0036 |
| 21000 | .90 | .10 | 56.85 | -111.43 | 111.43 | 18900 | .0030 |
| 21000 | .95 | .05 | 42.99 | -84.25  | 84.25  | 19950 | .0022 |
| 22000 | .05 | .95 | 7.41  | -14.52  | 14.52  | 1100  | .0067 |
| 22000 | .10 | .90 | 14.76 | -28.93  | 28.93  | 2200  | .0067 |
| 22000 | .15 | .85 | 22.00 | -43.11  | 43.11  | 3300  | .0067 |
| 22000 | .20 | .80 | 29.07 | -56.97  | 56.97  | 4400  | .0066 |
| 22000 | .25 | .75 | 35.90 | -70.37  | 70.37  | 5500  | .0065 |
| 22000 | .30 | .70 | 42.45 | -83.20  | 83.20  | 6600  | .0064 |
| 22000 | .35 | .65 | 48.63 | -95.31  | 95.31  | 7700  | .0063 |
| 22000 | .40 | .60 | 54.38 | -106.58 | 106.58 | 8800  | .0062 |
| 22000 | .45 | .55 | 59.61 | -116.83 | 116.83 | 9900  | .0060 |
| 22000 | .50 | .50 | 64.23 | -125.88 | 125.88 | 11000 | .0058 |
| 22000 | .55 | .45 | 68.13 | -133.54 | 133.54 | 12100 | .0056 |
| 22000 | .60 | .40 | 71.20 | -139.54 | 139.54 | 13200 | .0054 |
| 22000 | .65 | .35 | 73.27 | -143.60 | 143.60 | 14300 | .0051 |
| 22000 | .70 | .30 | 74.15 | -145.33 | 145.33 | 15400 | .0048 |
| 22000 | .75 | .25 | 73.58 | -144.22 | 144.22 | 16500 | .0045 |
| 22000 | .80 | .20 | 71.20 | -139.54 | 139.54 | 17600 | .0040 |
| 22000 | .85 | .15 | 66.41 | -130.17 | 130.17 | 18700 | .0036 |
| 22000 | .90 | .10 | 58.19 | -114.05 | 114.05 | 19800 | .0029 |
| 22000 | .95 | .05 | 44.00 | -86.24  | 86.24  | 20900 | .0021 |
| 23000 | .05 | .95 | 7.57  | -14.84  | 14.84  | 1150  | .0066 |
| 23000 | .10 | .90 | 15.09 | -29.58  | 29.58  | 2300  | .0066 |
| 23000 | .15 | .85 | 22.49 | -44.08  | 44.08  | 3450  | .0065 |
| 23000 | .20 | .80 | 29.72 | -58.25  | 58.25  | 4600  | .0065 |
| 23000 | .25 | .75 | 36.71 | -71.95  | 71.95  | 5750  | .0064 |
| 23000 | .30 | .70 | 43.40 | -85.07  | 85.07  | 6900  | .0063 |
| 23000 | .35 | .65 | 49.72 | -97.46  | 97.46  | 8050  | .0062 |
| 23000 | .40 | .60 | 55.60 | -108.97 | 108.97 | 9200  | .0060 |

|       |     |     |       |         |        |       |       |
|-------|-----|-----|-------|---------|--------|-------|-------|
| 23000 | .45 | .55 | 60.95 | -119.45 | 119.45 | 10350 | .0059 |
| 23000 | .50 | .50 | 65.67 | -128.71 | 128.71 | 11500 | .0057 |
| 23000 | .55 | .45 | 69.66 | -136.54 | 136.54 | 12650 | .0055 |
| 23000 | .60 | .40 | 72.80 | -142.68 | 142.68 | 13800 | .0053 |
| 23000 | .65 | .35 | 74.91 | -146.83 | 146.83 | 14950 | .0050 |
| 23000 | .70 | .30 | 75.81 | -148.59 | 148.59 | 16100 | .0047 |
| 23000 | .75 | .25 | 75.23 | -147.46 | 147.46 | 17250 | .0044 |
| 23000 | .80 | .20 | 72.80 | -142.68 | 142.68 | 18400 | .0040 |
| 23000 | .85 | .15 | 67.91 | -133.10 | 133.10 | 19550 | .0035 |
| 23000 | .90 | .10 | 59.50 | -116.61 | 116.61 | 20700 | .0029 |
| 23000 | .95 | .05 | 44.99 | -88.18  | 88.18  | 21850 | .0021 |
| 24000 | .05 | .95 | 7.74  | -15.16  | 15.16  | 1200  | .0064 |
| 24000 | .10 | .90 | 15.41 | -30.21  | 30.21  | 2400  | .0064 |
| 24000 | .15 | .85 | 22.97 | -45.03  | 45.03  | 3600  | .0064 |
| 24000 | .20 | .80 | 30.36 | -59.50  | 59.50  | 4800  | .0063 |
| 24000 | .25 | .75 | 37.50 | -73.50  | 73.50  | 6000  | .0063 |
| 24000 | .30 | .70 | 44.34 | -86.90  | 86.90  | 7200  | .0062 |
| 24000 | .35 | .65 | 50.79 | -99.55  | 99.55  | 8400  | .0060 |
| 24000 | .40 | .60 | 56.79 | -111.32 | 111.32 | 9600  | .0059 |
| 24000 | .45 | .55 | 62.26 | -122.02 | 122.02 | 10800 | .0058 |
| 24000 | .50 | .50 | 67.08 | -131.48 | 131.48 | 12000 | .0056 |
| 24000 | .55 | .45 | 71.16 | -139.48 | 139.48 | 13200 | .0054 |
| 24000 | .60 | .40 | 74.36 | -145.75 | 145.75 | 14400 | .0052 |
| 24000 | .65 | .35 | 76.52 | -149.99 | 149.99 | 15600 | .0049 |
| 24000 | .70 | .30 | 77.44 | -151.79 | 151.79 | 16800 | .0046 |
| 24000 | .75 | .25 | 76.85 | -150.63 | 150.63 | 18000 | .0043 |
| 24000 | .80 | .20 | 74.36 | -145.75 | 145.75 | 19200 | .0039 |
| 24000 | .85 | .15 | 69.37 | -135.96 | 135.96 | 20400 | .0034 |
| 24000 | .90 | .10 | 60.77 | -119.12 | 119.12 | 21600 | .0028 |
| 24000 | .95 | .05 | 45.95 | -90.07  | 90.07  | 22800 | .0020 |
| 25000 | .05 | .95 | 7.90  | -15.48  | 15.48  | 1250  | .0063 |
| 25000 | .10 | .90 | 15.73 | -30.83  | 30.83  | 2500  | .0063 |
| 25000 | .15 | .85 | 23.45 | -45.96  | 45.96  | 3750  | .0063 |
| 25000 | .20 | .80 | 30.98 | -60.73  | 60.73  | 5000  | .0062 |
| 25000 | .25 | .75 | 38.27 | -75.02  | 75.02  | 6250  | .0061 |
| 25000 | .30 | .70 | 45.25 | -88.69  | 88.69  | 7500  | .0060 |
| 25000 | .35 | .65 | 51.84 | -101.61 | 101.61 | 8750  | .0059 |
| 25000 | .40 | .60 | 57.97 | -113.61 | 113.61 | 10000 | .0058 |
| 25000 | .45 | .55 | 63.54 | -124.54 | 124.54 | 11250 | .0056 |
| 25000 | .50 | .50 | 68.47 | -134.19 | 134.19 | 12500 | .0055 |
| 25000 | .55 | .45 | 72.63 | -142.35 | 142.35 | 13750 | .0053 |
| 25000 | .60 | .40 | 75.89 | -148.75 | 148.75 | 15000 | .0051 |
| 25000 | .65 | .35 | 78.10 | -153.08 | 153.08 | 16250 | .0048 |
| 25000 | .70 | .30 | 79.04 | -154.92 | 154.92 | 17500 | .0045 |
| 25000 | .75 | .25 | 78.44 | -153.74 | 153.74 | 18750 | .0042 |
| 25000 | .80 | .20 | 75.89 | -148.75 | 148.75 | 20000 | .0038 |
| 25000 | .85 | .15 | 70.80 | -138.76 | 138.76 | 21250 | .0033 |
| 25000 | .90 | .10 | 62.03 | -121.58 | 121.58 | 22500 | .0028 |

|       |     |     |       |         |        |       |       |
|-------|-----|-----|-------|---------|--------|-------|-------|
| 25000 | .95 | .05 | 46.90 | -91.93  | 91.93  | 23750 | .0020 |
| 26000 | .05 | .95 | 8.05  | -15.78  | 15.78  | 1300  | .0062 |
| 26000 | .10 | .90 | 16.04 | -31.45  | 31.45  | 2600  | .0062 |
| 26000 | .15 | .85 | 23.91 | -46.87  | 46.87  | 3900  | .0061 |
| 26000 | .20 | .80 | 31.60 | -61.93  | 61.93  | 5200  | .0061 |
| 26000 | .25 | .75 | 39.03 | -76.50  | 76.50  | 6500  | .0060 |
| 26000 | .30 | .70 | 46.15 | -90.45  | 90.45  | 7800  | .0059 |
| 26000 | .35 | .65 | 52.87 | -103.62 | 103.62 | 9100  | .0058 |
| 26000 | .40 | .60 | 59.11 | -115.86 | 115.86 | 10400 | .0057 |
| 26000 | .45 | .55 | 64.80 | -127.00 | 127.00 | 11700 | .0055 |
| 26000 | .50 | .50 | 69.82 | -136.85 | 136.85 | 13000 | .0054 |
| 26000 | .55 | .45 | 74.07 | -145.17 | 145.17 | 14300 | .0052 |
| 26000 | .60 | .40 | 77.40 | -151.70 | 151.70 | 15600 | .0050 |
| 26000 | .65 | .35 | 79.65 | -156.11 | 156.11 | 16900 | .0047 |
| 26000 | .70 | .30 | 80.61 | -157.99 | 157.99 | 18200 | .0044 |
| 26000 | .75 | .25 | 79.99 | -156.78 | 156.78 | 19500 | .0041 |
| 26000 | .80 | .20 | 77.40 | -151.70 | 151.70 | 20800 | .0037 |
| 26000 | .85 | .15 | 72.20 | -141.51 | 141.51 | 22100 | .0033 |
| 26000 | .90 | .10 | 63.26 | -123.98 | 123.98 | 23400 | .0027 |
| 26000 | .95 | .05 | 47.83 | -93.75  | 93.75  | 24700 | .0019 |
| 27000 | .05 | .95 | 8.21  | -16.08  | 16.08  | 1350  | .0061 |
| 27000 | .10 | .90 | 16.35 | -32.04  | 32.04  | 2700  | .0061 |
| 27000 | .15 | .85 | 24.37 | -47.76  | 47.76  | 4050  | .0060 |
| 27000 | .20 | .80 | 32.20 | -63.11  | 63.11  | 5400  | .0060 |
| 27000 | .25 | .75 | 39.77 | -77.96  | 77.96  | 6750  | .0059 |
| 27000 | .30 | .70 | 47.02 | -92.17  | 92.17  | 8100  | .0058 |
| 27000 | .35 | .65 | 53.87 | -105.59 | 105.59 | 9450  | .0057 |
| 27000 | .40 | .60 | 60.24 | -118.07 | 118.07 | 10800 | .0056 |
| 27000 | .45 | .55 | 66.03 | -129.42 | 129.42 | 12150 | .0054 |
| 27000 | .50 | .50 | 71.15 | -139.46 | 139.46 | 13500 | .0053 |
| 27000 | .55 | .45 | 75.48 | -147.94 | 147.94 | 14850 | .0051 |
| 27000 | .60 | .40 | 78.87 | -154.59 | 154.59 | 16200 | .0049 |
| 27000 | .65 | .35 | 81.17 | -159.08 | 159.08 | 17550 | .0046 |
| 27000 | .70 | .30 | 82.14 | -161.00 | 161.00 | 18900 | .0043 |
| 27000 | .75 | .25 | 81.51 | -159.77 | 159.77 | 20250 | .0040 |
| 27000 | .80 | .20 | 78.87 | -154.59 | 154.59 | 21600 | .0037 |
| 27000 | .85 | .15 | 73.58 | -144.21 | 144.21 | 22950 | .0032 |
| 27000 | .90 | .10 | 64.46 | -126.34 | 126.34 | 24300 | .0027 |
| 27000 | .95 | .05 | 48.74 | -95.54  | 95.54  | 25650 | .0019 |
| 28000 | .05 | .95 | 8.36  | -16.38  | 16.38  | 1400  | .0060 |
| 28000 | .10 | .90 | 16.65 | -32.63  | 32.63  | 2800  | .0059 |
| 28000 | .15 | .85 | 24.82 | -48.64  | 48.64  | 4200  | .0059 |
| 28000 | .20 | .80 | 32.79 | -64.27  | 64.27  | 5600  | .0059 |
| 28000 | .25 | .75 | 40.50 | -79.39  | 79.39  | 7000  | .0058 |
| 28000 | .30 | .70 | 47.89 | -93.86  | 93.86  | 8400  | .0057 |
| 28000 | .35 | .65 | 54.86 | -107.53 | 107.53 | 9800  | .0056 |
| 28000 | .40 | .60 | 61.34 | -120.24 | 120.24 | 11200 | .0055 |
| 28000 | .45 | .55 | 67.24 | -131.80 | 131.80 | 12600 | .0053 |

|       |     |     |       |         |        |       |       |
|-------|-----|-----|-------|---------|--------|-------|-------|
| 28000 | .50 | .50 | 72.46 | -142.02 | 142.02 | 14000 | .0052 |
| 28000 | .55 | .45 | 76.86 | -150.65 | 150.65 | 15400 | .0050 |
| 28000 | .60 | .40 | 80.32 | -157.43 | 157.43 | 16800 | .0048 |
| 28000 | .65 | .35 | 82.65 | -162.00 | 162.00 | 18200 | .0045 |
| 28000 | .70 | .30 | 83.65 | -163.95 | 163.95 | 19600 | .0043 |
| 28000 | .75 | .25 | 83.01 | -162.70 | 162.70 | 21000 | .0040 |
| 28000 | .80 | .20 | 80.32 | -157.43 | 157.43 | 22400 | .0036 |
| 28000 | .85 | .15 | 74.93 | -146.85 | 146.85 | 23800 | .0031 |
| 28000 | .90 | .10 | 65.64 | -128.66 | 128.66 | 25200 | .0026 |
| 28000 | .95 | .05 | 49.64 | -97.29  | 97.29  | 26600 | .0019 |
| 29000 | .05 | .95 | 8.50  | -16.67  | 16.67  | 1450  | .0059 |
| 29000 | .10 | .90 | 16.94 | -33.21  | 33.21  | 2900  | .0058 |
| 29000 | .15 | .85 | 25.26 | -49.50  | 49.50  | 4350  | .0058 |
| 29000 | .20 | .80 | 33.37 | -65.41  | 65.41  | 5800  | .0058 |
| 29000 | .25 | .75 | 41.22 | -80.79  | 80.79  | 7250  | .0057 |
| 29000 | .30 | .70 | 48.73 | -95.52  | 95.52  | 8700  | .0056 |
| 29000 | .35 | .65 | 55.83 | -109.43 | 109.43 | 10150 | .0055 |
| 29000 | .40 | .60 | 62.43 | -122.36 | 122.36 | 11600 | .0054 |
| 29000 | .45 | .55 | 68.43 | -134.13 | 134.13 | 13050 | .0052 |
| 29000 | .50 | .50 | 73.74 | -144.53 | 144.53 | 14500 | .0051 |
| 29000 | .55 | .45 | 78.22 | -153.32 | 153.32 | 15950 | .0049 |
| 29000 | .60 | .40 | 81.74 | -160.21 | 160.21 | 17400 | .0047 |
| 29000 | .65 | .35 | 84.12 | -164.87 | 164.87 | 18850 | .0045 |
| 29000 | .70 | .30 | 85.13 | -166.85 | 166.85 | 20300 | .0042 |
| 29000 | .75 | .25 | 84.48 | -165.58 | 165.58 | 21750 | .0039 |
| 29000 | .80 | .20 | 81.74 | -160.21 | 160.21 | 23200 | .0035 |
| 29000 | .85 | .15 | 76.25 | -149.45 | 149.45 | 24650 | .0031 |
| 29000 | .90 | .10 | 66.81 | -130.94 | 130.94 | 26100 | .0026 |
| 29000 | .95 | .05 | 50.52 | -99.01  | 99.01  | 27550 | .0018 |
| 30000 | .05 | .95 | 8.65  | -16.95  | 16.95  | 1500  | .0058 |
| 30000 | .10 | .90 | 17.23 | -33.78  | 33.78  | 3000  | .0057 |
| 30000 | .15 | .85 | 25.69 | -50.35  | 50.35  | 4500  | .0057 |
| 30000 | .20 | .80 | 33.94 | -66.52  | 66.52  | 6000  | .0057 |
| 30000 | .25 | .75 | 41.93 | -82.18  | 82.18  | 7500  | .0056 |
| 30000 | .30 | .70 | 49.57 | -97.15  | 97.15  | 9000  | .0055 |
| 30000 | .35 | .65 | 56.79 | -111.30 | 111.30 | 10500 | .0054 |
| 30000 | .40 | .60 | 63.50 | -124.46 | 124.46 | 12000 | .0053 |
| 30000 | .45 | .55 | 69.60 | -136.43 | 136.43 | 13500 | .0052 |
| 30000 | .50 | .50 | 75.00 | -147.00 | 147.00 | 15000 | .0050 |
| 30000 | .55 | .45 | 79.56 | -155.94 | 155.94 | 16500 | .0048 |
| 30000 | .60 | .40 | 83.14 | -162.95 | 162.95 | 18000 | .0046 |
| 30000 | .65 | .35 | 85.56 | -167.69 | 167.69 | 19500 | .0044 |
| 30000 | .70 | .30 | 86.59 | -169.71 | 169.71 | 21000 | .0041 |
| 30000 | .75 | .25 | 85.92 | -168.41 | 168.41 | 22500 | .0038 |
| 30000 | .80 | .20 | 83.14 | -162.95 | 162.95 | 24000 | .0035 |
| 30000 | .85 | .15 | 77.56 | -152.01 | 152.01 | 25500 | .0030 |
| 30000 | .90 | .10 | 67.95 | -133.18 | 133.18 | 27000 | .0025 |
| 30000 | .95 | .05 | 51.38 | -100.70 | 100.70 | 28500 | .0018 |

|       |     |     |       |         |        |       |       |
|-------|-----|-----|-------|---------|--------|-------|-------|
| 31000 | .05 | .95 | 8.79  | -17.23  | 17.23  | 1550  | .0057 |
| 31000 | .10 | .90 | 17.52 | -34.34  | 34.34  | 3100  | .0057 |
| 31000 | .15 | .85 | 26.11 | -51.18  | 51.18  | 4650  | .0056 |
| 31000 | .20 | .80 | 34.50 | -67.62  | 67.62  | 6200  | .0056 |
| 31000 | .25 | .75 | 42.62 | -83.53  | 83.53  | 7750  | .0055 |
| 31000 | .30 | .70 | 50.39 | -98.76  | 98.76  | 9300  | .0054 |
| 31000 | .35 | .65 | 57.73 | -113.14 | 113.14 | 10850 | .0053 |
| 31000 | .40 | .60 | 64.55 | -126.51 | 126.51 | 12400 | .0052 |
| 31000 | .45 | .55 | 70.76 | -138.68 | 138.68 | 13950 | .0051 |
| 31000 | .50 | .50 | 76.24 | -149.43 | 149.43 | 15500 | .0049 |
| 31000 | .55 | .45 | 80.88 | -158.52 | 158.52 | 17050 | .0047 |
| 31000 | .60 | .40 | 84.51 | -165.64 | 165.64 | 18600 | .0045 |
| 31000 | .65 | .35 | 86.97 | -170.46 | 170.46 | 20150 | .0043 |
| 31000 | .70 | .30 | 88.02 | -172.51 | 172.51 | 21700 | .0041 |
| 31000 | .75 | .25 | 87.34 | -171.19 | 171.19 | 23250 | .0038 |
| 31000 | .80 | .20 | 84.51 | -165.64 | 165.64 | 24800 | .0034 |
| 31000 | .85 | .15 | 78.84 | -154.52 | 154.52 | 26350 | .0030 |
| 31000 | .90 | .10 | 69.07 | -135.38 | 135.38 | 27900 | .0025 |
| 31000 | .95 | .05 | 52.23 | -102.37 | 102.37 | 29450 | .0018 |
| 32000 | .05 | .95 | 8.93  | -17.51  | 17.51  | 1600  | .0056 |
| 32000 | .10 | .90 | 17.80 | -34.89  | 34.89  | 3200  | .0056 |
| 32000 | .15 | .85 | 26.53 | -52.00  | 52.00  | 4800  | .0055 |
| 32000 | .20 | .80 | 35.05 | -68.71  | 68.71  | 6400  | .0055 |
| 32000 | .25 | .75 | 43.30 | -84.87  | 84.87  | 8000  | .0054 |
| 32000 | .30 | .70 | 51.19 | -100.34 | 100.34 | 9600  | .0053 |
| 32000 | .35 | .65 | 58.65 | -114.95 | 114.95 | 11200 | .0052 |
| 32000 | .40 | .60 | 65.58 | -128.54 | 128.54 | 12800 | .0051 |
| 32000 | .45 | .55 | 71.89 | -140.90 | 140.90 | 14400 | .0050 |
| 32000 | .50 | .50 | 77.46 | -151.82 | 151.82 | 16000 | .0048 |
| 32000 | .55 | .45 | 82.17 | -161.05 | 161.05 | 17600 | .0047 |
| 32000 | .60 | .40 | 85.87 | -168.30 | 168.30 | 19200 | .0045 |
| 32000 | .65 | .35 | 88.36 | -173.19 | 173.19 | 20800 | .0042 |
| 32000 | .70 | .30 | 89.42 | -175.27 | 175.27 | 22400 | .0040 |
| 32000 | .75 | .25 | 88.74 | -173.93 | 173.93 | 24000 | .0037 |
| 32000 | .80 | .20 | 85.87 | -168.30 | 168.30 | 25600 | .0034 |
| 32000 | .85 | .15 | 80.10 | -156.99 | 156.99 | 27200 | .0029 |
| 32000 | .90 | .10 | 70.18 | -137.55 | 137.55 | 28800 | .0024 |
| 32000 | .95 | .05 | 53.06 | -104.01 | 104.01 | 30400 | .0017 |
| 33000 | .05 | .95 | 9.07  | -17.78  | 17.78  | 1650  | .0055 |
| 33000 | .10 | .90 | 18.07 | -35.43  | 35.43  | 3300  | .0055 |
| 33000 | .15 | .85 | 26.94 | -52.80  | 52.80  | 4950  | .0054 |
| 33000 | .20 | .80 | 35.60 | -69.77  | 69.77  | 6600  | .0054 |
| 33000 | .25 | .75 | 43.97 | -86.19  | 86.19  | 8250  | .0053 |
| 33000 | .30 | .70 | 51.99 | -101.90 | 101.90 | 9900  | .0053 |
| 33000 | .35 | .65 | 59.56 | -116.74 | 116.74 | 11550 | .0052 |
| 33000 | .40 | .60 | 66.60 | -130.53 | 130.53 | 13200 | .0050 |
| 33000 | .45 | .55 | 73.00 | -143.08 | 143.08 | 14850 | .0049 |
| 33000 | .50 | .50 | 78.66 | -154.17 | 154.17 | 16500 | .0048 |

|       |     |     |       |         |        |       |       |
|-------|-----|-----|-------|---------|--------|-------|-------|
| 33000 | .55 | .45 | 83.44 | -163.55 | 163.55 | 18150 | .0046 |
| 33000 | .60 | .40 | 87.20 | -170.90 | 170.90 | 19800 | .0044 |
| 33000 | .65 | .35 | 89.73 | -175.87 | 175.87 | 21450 | .0042 |
| 33000 | .70 | .30 | 90.81 | -177.99 | 177.99 | 23100 | .0039 |
| 33000 | .75 | .25 | 90.12 | -176.63 | 176.63 | 24750 | .0036 |
| 33000 | .80 | .20 | 87.20 | -170.90 | 170.90 | 26400 | .0033 |
| 33000 | .85 | .15 | 81.34 | -159.43 | 159.43 | 28050 | .0029 |
| 33000 | .90 | .10 | 71.26 | -139.68 | 139.68 | 29700 | .0024 |
| 33000 | .95 | .05 | 53.89 | -105.62 | 105.62 | 31350 | .0017 |
| 34000 | .05 | .95 | 9.21  | -18.05  | 18.05  | 1700  | .0054 |
| 34000 | .10 | .90 | 18.35 | -35.96  | 35.96  | 3400  | .0054 |
| 34000 | .15 | .85 | 27.35 | -53.60  | 53.60  | 5100  | .0054 |
| 34000 | .20 | .80 | 36.13 | -70.82  | 70.82  | 6800  | .0053 |
| 34000 | .25 | .75 | 44.63 | -87.48  | 87.48  | 8500  | .0053 |
| 34000 | .30 | .70 | 52.77 | -103.43 | 103.43 | 10200 | .0052 |
| 34000 | .35 | .65 | 60.45 | -118.49 | 118.49 | 11900 | .0051 |
| 34000 | .40 | .60 | 67.60 | -132.49 | 132.49 | 13600 | .0050 |
| 34000 | .45 | .55 | 74.10 | -145.24 | 145.24 | 15300 | .0048 |
| 34000 | .50 | .50 | 79.84 | -156.49 | 156.49 | 17000 | .0047 |
| 34000 | .55 | .45 | 84.70 | -166.01 | 166.01 | 18700 | .0045 |
| 34000 | .60 | .40 | 88.51 | -173.47 | 173.47 | 20400 | .0043 |
| 34000 | .65 | .35 | 91.08 | -178.52 | 178.52 | 22100 | .0041 |
| 34000 | .70 | .30 | 92.18 | -180.67 | 180.67 | 23800 | .0039 |
| 34000 | .75 | .25 | 91.47 | -179.29 | 179.29 | 25500 | .0036 |
| 34000 | .80 | .20 | 88.51 | -173.47 | 173.47 | 27200 | .0033 |
| 34000 | .85 | .15 | 82.56 | -161.83 | 161.83 | 28900 | .0029 |
| 34000 | .90 | .10 | 72.34 | -141.78 | 141.78 | 30600 | .0024 |
| 34000 | .95 | .05 | 54.70 | -107.21 | 107.21 | 32300 | .0017 |
| 35000 | .05 | .95 | 9.34  | -18.31  | 18.31  | 1750  | .0053 |
| 35000 | .10 | .90 | 18.61 | -36.48  | 36.48  | 3500  | .0053 |
| 35000 | .15 | .85 | 27.74 | -54.38  | 54.38  | 5250  | .0053 |
| 35000 | .20 | .80 | 36.66 | -71.85  | 71.85  | 7000  | .0052 |
| 35000 | .25 | .75 | 45.29 | -88.76  | 88.76  | 8750  | .0052 |
| 35000 | .30 | .70 | 53.54 | -104.94 | 104.94 | 10500 | .0051 |
| 35000 | .35 | .65 | 61.34 | -120.22 | 120.22 | 12250 | .0050 |
| 35000 | .40 | .60 | 68.59 | -134.43 | 134.43 | 14000 | .0049 |
| 35000 | .45 | .55 | 75.18 | -147.36 | 147.36 | 15750 | .0048 |
| 35000 | .50 | .50 | 81.01 | -158.78 | 158.78 | 17500 | .0046 |
| 35000 | .55 | .45 | 85.93 | -168.43 | 168.43 | 19250 | .0045 |
| 35000 | .60 | .40 | 89.80 | -176.01 | 176.01 | 21000 | .0043 |
| 35000 | .65 | .35 | 92.41 | -181.13 | 181.13 | 22750 | .0041 |
| 35000 | .70 | .30 | 93.52 | -183.30 | 183.30 | 24500 | .0038 |
| 35000 | .75 | .25 | 92.81 | -181.90 | 181.90 | 26250 | .0035 |
| 35000 | .80 | .20 | 89.80 | -176.01 | 176.01 | 28000 | .0032 |
| 35000 | .85 | .15 | 83.77 | -164.19 | 164.19 | 29750 | .0028 |
| 35000 | .90 | .10 | 73.39 | -143.85 | 143.85 | 31500 | .0023 |
| 35000 | .95 | .05 | 55.50 | -108.77 | 108.77 | 33250 | .0017 |
| 36000 | .05 | .95 | 9.47  | -18.57  | 18.57  | 1800  | .0053 |

|       |     |     |       |         |        |       |       |
|-------|-----|-----|-------|---------|--------|-------|-------|
| 36000 | .10 | .90 | 18.88 | -37.00  | 37.00  | 3600  | .0052 |
| 36000 | .15 | .85 | 28.14 | -55.15  | 55.15  | 5400  | .0052 |
| 36000 | .20 | .80 | 37.18 | -72.87  | 72.87  | 7200  | .0052 |
| 36000 | .25 | .75 | 45.93 | -90.02  | 90.02  | 9000  | .0051 |
| 36000 | .30 | .70 | 54.30 | -106.43 | 106.43 | 10800 | .0050 |
| 36000 | .35 | .65 | 62.21 | -121.93 | 121.93 | 12600 | .0049 |
| 36000 | .40 | .60 | 69.56 | -136.33 | 136.33 | 14400 | .0048 |
| 36000 | .45 | .55 | 76.25 | -149.45 | 149.45 | 16200 | .0047 |
| 36000 | .50 | .50 | 82.16 | -161.03 | 161.03 | 18000 | .0046 |
| 36000 | .55 | .45 | 87.15 | -170.82 | 170.82 | 19800 | .0044 |
| 36000 | .60 | .40 | 91.07 | -178.50 | 178.50 | 21600 | .0042 |
| 36000 | .65 | .35 | 93.72 | -183.69 | 183.69 | 23400 | .0040 |
| 36000 | .70 | .30 | 94.85 | -185.90 | 185.90 | 25200 | .0038 |
| 36000 | .75 | .25 | 94.12 | -184.48 | 184.48 | 27000 | .0035 |
| 36000 | .80 | .20 | 91.07 | -178.50 | 178.50 | 28800 | .0032 |
| 36000 | .85 | .15 | 84.96 | -166.52 | 166.52 | 30600 | .0028 |
| 36000 | .90 | .10 | 74.43 | -145.89 | 145.89 | 32400 | .0023 |
| 36000 | .95 | .05 | 56.28 | -110.31 | 110.31 | 34200 | .0016 |
| 37000 | .05 | .95 | 9.61  | -18.83  | 18.83  | 1850  | .0052 |
| 37000 | .10 | .90 | 19.14 | -37.51  | 37.51  | 3700  | .0052 |
| 37000 | .15 | .85 | 28.53 | -55.91  | 55.91  | 5550  | .0051 |
| 37000 | .20 | .80 | 37.69 | -73.88  | 73.88  | 7400  | .0051 |
| 37000 | .25 | .75 | 46.56 | -91.26  | 91.26  | 9250  | .0050 |
| 37000 | .30 | .70 | 55.05 | -107.89 | 107.89 | 11100 | .0050 |
| 37000 | .35 | .65 | 63.07 | -123.61 | 123.61 | 12950 | .0049 |
| 37000 | .40 | .60 | 70.52 | -138.22 | 138.22 | 14800 | .0048 |
| 37000 | .45 | .55 | 77.30 | -151.51 | 151.51 | 16650 | .0046 |
| 37000 | .50 | .50 | 83.29 | -163.25 | 163.25 | 18500 | .0045 |
| 37000 | .55 | .45 | 88.36 | -173.18 | 173.18 | 20350 | .0043 |
| 37000 | .60 | .40 | 92.33 | -180.97 | 180.97 | 22200 | .0042 |
| 37000 | .65 | .35 | 95.01 | -186.23 | 186.23 | 24050 | .0040 |
| 37000 | .70 | .30 | 96.16 | -188.47 | 188.47 | 25900 | .0037 |
| 37000 | .75 | .25 | 95.42 | -187.03 | 187.03 | 27750 | .0034 |
| 37000 | .80 | .20 | 92.33 | -180.97 | 180.97 | 29600 | .0031 |
| 37000 | .85 | .15 | 86.13 | -168.81 | 168.81 | 31450 | .0027 |
| 37000 | .90 | .10 | 75.46 | -147.90 | 147.90 | 33300 | .0023 |
| 37000 | .95 | .05 | 57.06 | -111.84 | 111.84 | 35150 | .0016 |
| 38000 | .05 | .95 | 9.73  | -19.08  | 19.08  | 1900  | .0051 |
| 38000 | .10 | .90 | 19.40 | -38.02  | 38.02  | 3800  | .0051 |
| 38000 | .15 | .85 | 28.91 | -56.66  | 56.66  | 5700  | .0051 |
| 38000 | .20 | .80 | 38.20 | -74.87  | 74.87  | 7600  | .0050 |
| 38000 | .25 | .75 | 47.19 | -92.49  | 92.49  | 9500  | .0050 |
| 38000 | .30 | .70 | 55.79 | -109.34 | 109.34 | 11400 | .0049 |
| 38000 | .35 | .65 | 63.91 | -125.27 | 125.27 | 13300 | .0048 |
| 38000 | .40 | .60 | 71.46 | -140.07 | 140.07 | 15200 | .0047 |
| 38000 | .45 | .55 | 78.34 | -153.54 | 153.54 | 17100 | .0046 |
| 38000 | .50 | .50 | 84.41 | -165.44 | 165.44 | 19000 | .0044 |
| 38000 | .55 | .45 | 89.54 | -175.50 | 175.50 | 20900 | .0043 |

|       |     |     |       |         |        |       |       |
|-------|-----|-----|-------|---------|--------|-------|-------|
| 38000 | .60 | .40 | 93.57 | -183.40 | 183.40 | 22800 | .0041 |
| 38000 | .65 | .35 | 96.29 | -188.73 | 188.73 | 24700 | .0039 |
| 38000 | .70 | .30 | 97.45 | -191.00 | 191.00 | 26600 | .0037 |
| 38000 | .75 | .25 | 96.70 | -189.54 | 189.54 | 28500 | .0034 |
| 38000 | .80 | .20 | 93.57 | -183.40 | 183.40 | 30400 | .0031 |
| 38000 | .85 | .15 | 87.29 | -171.08 | 171.08 | 32300 | .0027 |
| 38000 | .90 | .10 | 76.47 | -149.89 | 149.89 | 34200 | .0022 |
| 38000 | .95 | .05 | 57.83 | -113.34 | 113.34 | 36100 | .0016 |
| 39000 | .05 | .95 | 9.86  | -19.33  | 19.33  | 1950  | .0051 |
| 39000 | .10 | .90 | 19.65 | -38.51  | 38.51  | 3900  | .0050 |
| 39000 | .15 | .85 | 29.29 | -57.40  | 57.40  | 5850  | .0050 |
| 39000 | .20 | .80 | 38.70 | -75.85  | 75.85  | 7800  | .0050 |
| 39000 | .25 | .75 | 47.80 | -93.69  | 93.69  | 9750  | .0049 |
| 39000 | .30 | .70 | 56.52 | -110.77 | 110.77 | 11700 | .0048 |
| 39000 | .35 | .65 | 64.75 | -126.91 | 126.91 | 13650 | .0047 |
| 39000 | .40 | .60 | 72.40 | -141.90 | 141.90 | 15600 | .0046 |
| 39000 | .45 | .55 | 79.36 | -155.55 | 155.55 | 17550 | .0045 |
| 39000 | .50 | .50 | 85.51 | -167.61 | 167.61 | 19500 | .0044 |
| 39000 | .55 | .45 | 90.71 | -177.80 | 177.80 | 21450 | .0042 |
| 39000 | .60 | .40 | 94.79 | -185.79 | 185.79 | 23400 | .0041 |
| 39000 | .65 | .35 | 97.55 | -191.20 | 191.20 | 25350 | .0038 |
| 39000 | .70 | .30 | 98.72 | -193.50 | 193.50 | 27300 | .0036 |
| 39000 | .75 | .25 | 97.97 | -192.02 | 192.02 | 29250 | .0033 |
| 39000 | .80 | .20 | 94.79 | -185.79 | 185.79 | 31200 | .0030 |
| 39000 | .85 | .15 | 88.43 | -173.32 | 173.32 | 33150 | .0027 |
| 39000 | .90 | .10 | 77.47 | -151.85 | 151.85 | 35100 | .0022 |
| 39000 | .95 | .05 | 58.58 | -114.82 | 114.82 | 37050 | .0016 |
| 40000 | .05 | .95 | 9.99  | -19.58  | 19.58  | 2000  | .0050 |
| 40000 | .10 | .90 | 19.90 | -39.00  | 39.00  | 4000  | .0050 |
| 40000 | .15 | .85 | 29.66 | -58.13  | 58.13  | 6000  | .0049 |
| 40000 | .20 | .80 | 39.19 | -76.82  | 76.82  | 8000  | .0049 |
| 40000 | .25 | .75 | 48.41 | -94.89  | 94.89  | 10000 | .0048 |
| 40000 | .30 | .70 | 57.24 | -112.18 | 112.18 | 12000 | .0048 |
| 40000 | .35 | .65 | 65.57 | -128.52 | 128.52 | 14000 | .0047 |
| 40000 | .40 | .60 | 73.32 | -143.71 | 143.71 | 16000 | .0046 |
| 40000 | .45 | .55 | 80.37 | -157.53 | 157.53 | 18000 | .0045 |
| 40000 | .50 | .50 | 86.60 | -169.74 | 169.74 | 20000 | .0043 |
| 40000 | .55 | .45 | 91.87 | -180.06 | 180.06 | 22000 | .0042 |
| 40000 | .60 | .40 | 96.00 | -188.16 | 188.16 | 24000 | .0040 |
| 40000 | .65 | .35 | 98.79 | -193.63 | 193.63 | 26000 | .0038 |
| 40000 | .70 | .30 | 99.98 | -195.96 | 195.96 | 28000 | .0036 |
| 40000 | .75 | .25 | 99.22 | -194.46 | 194.46 | 30000 | .0033 |
| 40000 | .80 | .20 | 96.00 | -188.16 | 188.16 | 32000 | .0030 |
| 40000 | .85 | .15 | 89.55 | -175.52 | 175.52 | 34000 | .0026 |
| 40000 | .90 | .10 | 78.46 | -153.78 | 153.78 | 36000 | .0022 |
| 40000 | .95 | .05 | 59.33 | -116.28 | 116.28 | 38000 | .0016 |
| 41000 | .05 | .95 | 10.11 | -19.82  | 19.82  | 2050  | .0049 |
| 41000 | .10 | .90 | 20.15 | -39.49  | 39.49  | 4100  | .0049 |



|       |     |     |        |         |        |       |       |
|-------|-----|-----|--------|---------|--------|-------|-------|
| 41000 | .15 | .85 | 30.03  | -58.86  | 58.86  | 6150  | .0049 |
| 41000 | .20 | .80 | 39.68  | -77.77  | 77.77  | 8200  | .0048 |
| 41000 | .25 | .75 | 49.01  | -96.07  | 96.07  | 10250 | .0048 |
| 41000 | .30 | .70 | 57.95  | -113.58 | 113.58 | 12300 | .0047 |
| 41000 | .35 | .65 | 66.39  | -130.12 | 130.12 | 14350 | .0046 |
| 41000 | .40 | .60 | 74.23  | -145.49 | 145.49 | 16400 | .0045 |
| 41000 | .45 | .55 | 81.37  | -159.49 | 159.49 | 18450 | .0044 |
| 41000 | .50 | .50 | 87.68  | -171.85 | 171.85 | 20500 | .0043 |
| 41000 | .55 | .45 | 93.01  | -182.30 | 182.30 | 22550 | .0041 |
| 41000 | .60 | .40 | 97.19  | -190.50 | 190.50 | 24600 | .0040 |
| 41000 | .65 | .35 | 100.02 | -196.04 | 196.04 | 26650 | .0038 |
| 41000 | .70 | .30 | 101.22 | -198.40 | 198.40 | 28700 | .0035 |
| 41000 | .75 | .25 | 100.45 | -196.88 | 196.88 | 30750 | .0033 |
| 41000 | .80 | .20 | 97.19  | -190.50 | 190.50 | 32800 | .0030 |
| 41000 | .85 | .15 | 90.67  | -177.70 | 177.70 | 34850 | .0026 |
| 41000 | .90 | .10 | 79.43  | -155.69 | 155.69 | 36900 | .0022 |
| 41000 | .95 | .05 | 60.06  | -117.73 | 117.73 | 38950 | .0015 |
| 42000 | .05 | .95 | 10.23  | -20.06  | 20.06  | 2100  | .0049 |
| 42000 | .10 | .90 | 20.39  | -39.97  | 39.97  | 4200  | .0049 |
| 42000 | .15 | .85 | 30.39  | -59.57  | 59.57  | 6300  | .0048 |
| 42000 | .20 | .80 | 40.16  | -78.71  | 78.71  | 8400  | .0048 |
| 42000 | .25 | .75 | 49.61  | -97.23  | 97.23  | 10500 | .0047 |
| 42000 | .30 | .70 | 58.65  | -114.95 | 114.95 | 12600 | .0047 |
| 42000 | .35 | .65 | 67.19  | -131.70 | 131.70 | 14700 | .0046 |
| 42000 | .40 | .60 | 75.13  | -147.26 | 147.26 | 16800 | .0045 |
| 42000 | .45 | .55 | 82.36  | -161.42 | 161.42 | 18900 | .0044 |
| 42000 | .50 | .50 | 88.74  | -173.93 | 173.93 | 21000 | .0042 |
| 42000 | .55 | .45 | 94.14  | -184.51 | 184.51 | 23100 | .0041 |
| 42000 | .60 | .40 | 98.37  | -192.81 | 192.81 | 25200 | .0039 |
| 42000 | .65 | .35 | 101.23 | -198.41 | 198.41 | 27300 | .0037 |
| 42000 | .70 | .30 | 102.45 | -200.80 | 200.80 | 29400 | .0035 |
| 42000 | .75 | .25 | 101.67 | -199.26 | 199.26 | 31500 | .0032 |
| 42000 | .80 | .20 | 98.37  | -192.81 | 192.81 | 33600 | .0029 |
| 42000 | .85 | .15 | 91.76  | -179.86 | 179.86 | 35700 | .0026 |
| 42000 | .90 | .10 | 80.40  | -157.58 | 157.58 | 37800 | .0021 |
| 42000 | .95 | .05 | 60.79  | -119.15 | 119.15 | 39900 | .0015 |
| 43000 | .05 | .95 | 10.36  | -20.30  | 20.30  | 2150  | .0048 |
| 43000 | .10 | .90 | 20.63  | -40.44  | 40.44  | 4300  | .0048 |
| 43000 | .15 | .85 | 30.75  | -60.28  | 60.28  | 6450  | .0048 |
| 43000 | .20 | .80 | 40.63  | -79.64  | 79.64  | 8600  | .0047 |
| 43000 | .25 | .75 | 50.19  | -98.38  | 98.38  | 10750 | .0047 |
| 43000 | .30 | .70 | 59.34  | -116.31 | 116.31 | 12900 | .0046 |
| 43000 | .35 | .65 | 67.99  | -133.25 | 133.25 | 15050 | .0045 |
| 43000 | .40 | .60 | 76.02  | -149.00 | 149.00 | 17200 | .0044 |
| 43000 | .45 | .55 | 83.33  | -163.33 | 163.33 | 19350 | .0043 |
| 43000 | .50 | .50 | 89.79  | -175.99 | 175.99 | 21500 | .0042 |
| 43000 | .55 | .45 | 95.25  | -186.69 | 186.69 | 23650 | .0040 |
| 43000 | .60 | .40 | 99.53  | -195.09 | 195.09 | 25800 | .0039 |

|       |     |     |        |         |        |       |       |
|-------|-----|-----|--------|---------|--------|-------|-------|
| 43000 | .65 | .35 | 102.43 | -200.76 | 200.76 | 27950 | .0037 |
| 43000 | .70 | .30 | 103.66 | -203.18 | 203.18 | 30100 | .0034 |
| 43000 | .75 | .25 | 102.87 | -201.62 | 201.62 | 32250 | .0032 |
| 43000 | .80 | .20 | 99.53  | -195.09 | 195.09 | 34400 | .0029 |
| 43000 | .85 | .15 | 92.85  | -181.99 | 181.99 | 36550 | .0025 |
| 43000 | .90 | .10 | 81.35  | -159.44 | 159.44 | 38700 | .0021 |
| 43000 | .95 | .05 | 61.51  | -120.56 | 120.56 | 40850 | .0015 |
| 44000 | .05 | .95 | 10.47  | -20.53  | 20.53  | 2200  | .0048 |
| 44000 | .10 | .90 | 20.87  | -40.91  | 40.91  | 4400  | .0047 |
| 44000 | .15 | .85 | 31.11  | -60.97  | 60.97  | 6600  | .0047 |
| 44000 | .20 | .80 | 41.10  | -80.57  | 80.57  | 8800  | .0047 |
| 44000 | .25 | .75 | 50.78  | -99.52  | 99.52  | 11000 | .0046 |
| 44000 | .30 | .70 | 60.03  | -117.66 | 117.66 | 13200 | .0045 |
| 44000 | .35 | .65 | 68.77  | -134.80 | 134.80 | 15400 | .0045 |
| 44000 | .40 | .60 | 76.90  | -150.72 | 150.72 | 17600 | .0044 |
| 44000 | .45 | .55 | 84.30  | -165.22 | 165.22 | 19800 | .0043 |
| 44000 | .50 | .50 | 90.83  | -178.03 | 178.03 | 22000 | .0041 |
| 44000 | .55 | .45 | 96.35  | -188.85 | 188.85 | 24200 | .0040 |
| 44000 | .60 | .40 | 100.69 | -197.34 | 197.34 | 26400 | .0038 |
| 44000 | .65 | .35 | 103.61 | -203.08 | 203.08 | 28600 | .0036 |
| 44000 | .70 | .30 | 104.86 | -205.53 | 205.53 | 30800 | .0034 |
| 44000 | .75 | .25 | 104.06 | -203.95 | 203.95 | 33000 | .0032 |
| 44000 | .80 | .20 | 100.69 | -197.34 | 197.34 | 35200 | .0029 |
| 44000 | .85 | .15 | 93.92  | -184.09 | 184.09 | 37400 | .0025 |
| 44000 | .90 | .10 | 82.29  | -161.29 | 161.29 | 39600 | .0021 |
| 44000 | .95 | .05 | 62.22  | -121.96 | 121.96 | 41800 | .0015 |
| 45000 | .05 | .95 | 10.59  | -20.76  | 20.76  | 2250  | .0047 |
| 45000 | .10 | .90 | 21.11  | -41.37  | 41.37  | 4500  | .0047 |
| 45000 | .15 | .85 | 31.46  | -61.66  | 61.66  | 6750  | .0047 |
| 45000 | .20 | .80 | 41.57  | -81.48  | 81.48  | 9000  | .0046 |
| 45000 | .25 | .75 | 51.35  | -100.64 | 100.64 | 11250 | .0046 |
| 45000 | .30 | .70 | 60.71  | -118.99 | 118.99 | 13500 | .0045 |
| 45000 | .35 | .65 | 69.55  | -136.32 | 136.32 | 15750 | .0044 |
| 45000 | .40 | .60 | 77.77  | -152.43 | 152.43 | 18000 | .0043 |
| 45000 | .45 | .55 | 85.25  | -167.09 | 167.09 | 20250 | .0042 |
| 45000 | .50 | .50 | 91.86  | -180.04 | 180.04 | 22500 | .0041 |
| 45000 | .55 | .45 | 97.44  | -190.98 | 190.98 | 24750 | .0039 |
| 45000 | .60 | .40 | 101.82 | -199.57 | 199.57 | 27000 | .0038 |
| 45000 | .65 | .35 | 104.78 | -205.38 | 205.38 | 29250 | .0036 |
| 45000 | .70 | .30 | 106.04 | -207.85 | 207.85 | 31500 | .0034 |
| 45000 | .75 | .25 | 105.23 | -206.26 | 206.26 | 33750 | .0031 |
| 45000 | .80 | .20 | 101.82 | -199.57 | 199.57 | 36000 | .0028 |
| 45000 | .85 | .15 | 94.99  | -186.17 | 186.17 | 38250 | .0025 |
| 45000 | .90 | .10 | 83.22  | -163.11 | 163.11 | 40500 | .0021 |
| 45000 | .95 | .05 | 62.93  | -123.34 | 123.34 | 42750 | .0015 |
| 46000 | .05 | .95 | 10.71  | -20.99  | 20.99  | 2300  | .0047 |
| 46000 | .10 | .90 | 21.34  | -41.83  | 41.83  | 4600  | .0046 |
| 46000 | .15 | .85 | 31.81  | -62.34  | 62.34  | 6900  | .0046 |

|       |     |     |        |         |        |       |       |
|-------|-----|-----|--------|---------|--------|-------|-------|
| 46000 | .20 | .80 | 42.03  | -82.38  | 82.38  | 9200  | .0046 |
| 46000 | .25 | .75 | 51.92  | -101.76 | 101.76 | 11500 | .0045 |
| 46000 | .30 | .70 | 61.38  | -120.30 | 120.30 | 13800 | .0044 |
| 46000 | .35 | .65 | 70.32  | -137.82 | 137.82 | 16100 | .0044 |
| 46000 | .40 | .60 | 78.63  | -154.11 | 154.11 | 18400 | .0043 |
| 46000 | .45 | .55 | 86.19  | -168.93 | 168.93 | 20700 | .0042 |
| 46000 | .50 | .50 | 92.87  | -182.03 | 182.03 | 23000 | .0040 |
| 46000 | .55 | .45 | 98.52  | -193.09 | 193.09 | 25300 | .0039 |
| 46000 | .60 | .40 | 102.95 | -201.78 | 201.78 | 27600 | .0037 |
| 46000 | .65 | .35 | 105.94 | -207.65 | 207.65 | 29900 | .0035 |
| 46000 | .70 | .30 | 107.22 | -210.14 | 210.14 | 32200 | .0033 |
| 46000 | .75 | .25 | 106.40 | -208.54 | 208.54 | 34500 | .0031 |
| 46000 | .80 | .20 | 102.95 | -201.78 | 201.78 | 36800 | .0028 |
| 46000 | .85 | .15 | 96.03  | -188.23 | 188.23 | 39100 | .0025 |
| 46000 | .90 | .10 | 84.14  | -164.91 | 164.91 | 41400 | .0020 |
| 46000 | .95 | .05 | 63.62  | -124.70 | 124.70 | 43700 | .0015 |
| 47000 | .05 | .95 | 10.83  | -21.22  | 21.22  | 2350  | .0046 |
| 47000 | .10 | .90 | 21.57  | -42.28  | 42.28  | 4700  | .0046 |
| 47000 | .15 | .85 | 32.15  | -63.02  | 63.02  | 7050  | .0046 |
| 47000 | .20 | .80 | 42.48  | -83.27  | 83.27  | 9400  | .0045 |
| 47000 | .25 | .75 | 52.48  | -102.86 | 102.86 | 11750 | .0045 |
| 47000 | .30 | .70 | 62.04  | -121.60 | 121.60 | 14100 | .0044 |
| 47000 | .35 | .65 | 71.08  | -139.31 | 139.31 | 16450 | .0043 |
| 47000 | .40 | .60 | 79.48  | -155.78 | 155.78 | 18800 | .0042 |
| 47000 | .45 | .55 | 87.12  | -170.76 | 170.76 | 21150 | .0041 |
| 47000 | .50 | .50 | 93.87  | -183.99 | 183.99 | 23500 | .0040 |
| 47000 | .55 | .45 | 99.58  | -195.18 | 195.18 | 25850 | .0039 |
| 47000 | .60 | .40 | 104.06 | -203.96 | 203.96 | 28200 | .0037 |
| 47000 | .65 | .35 | 107.09 | -209.89 | 209.89 | 30550 | .0035 |
| 47000 | .70 | .30 | 108.38 | -212.42 | 212.42 | 32900 | .0033 |
| 47000 | .75 | .25 | 107.55 | -210.79 | 210.79 | 35250 | .0031 |
| 47000 | .80 | .20 | 104.06 | -203.96 | 203.96 | 37600 | .0028 |
| 47000 | .85 | .15 | 97.07  | -190.26 | 190.26 | 39950 | .0024 |
| 47000 | .90 | .10 | 85.05  | -166.70 | 166.70 | 42300 | .0020 |
| 47000 | .95 | .05 | 64.31  | -126.05 | 126.05 | 44650 | .0014 |
| 48000 | .05 | .95 | 10.94  | -21.44  | 21.44  | 2400  | .0046 |
| 48000 | .10 | .90 | 21.80  | -42.73  | 42.73  | 4800  | .0045 |
| 48000 | .15 | .85 | 32.49  | -63.68  | 63.68  | 7200  | .0045 |
| 48000 | .20 | .80 | 42.93  | -84.15  | 84.15  | 9600  | .0045 |
| 48000 | .25 | .75 | 53.03  | -103.94 | 103.94 | 12000 | .0044 |
| 48000 | .30 | .70 | 62.70  | -122.89 | 122.89 | 14400 | .0044 |
| 48000 | .35 | .65 | 71.83  | -140.79 | 140.79 | 16800 | .0043 |
| 48000 | .40 | .60 | 80.32  | -157.43 | 157.43 | 19200 | .0042 |
| 48000 | .45 | .55 | 88.04  | -172.57 | 172.57 | 21600 | .0041 |
| 48000 | .50 | .50 | 94.87  | -185.94 | 185.94 | 24000 | .0040 |
| 48000 | .55 | .45 | 100.64 | -197.25 | 197.25 | 26400 | .0038 |
| 48000 | .60 | .40 | 105.16 | -206.12 | 206.12 | 28800 | .0037 |
| 48000 | .65 | .35 | 108.22 | -212.11 | 212.11 | 31200 | .0035 |

|       |     |     |        |         |        |       |       |
|-------|-----|-----|--------|---------|--------|-------|-------|
| 48000 | .70 | .30 | 109.52 | -214.66 | 214.66 | 33600 | .0033 |
| 48000 | .75 | .25 | 108.69 | -213.02 | 213.02 | 36000 | .0030 |
| 48000 | .80 | .20 | 105.16 | -206.12 | 206.12 | 38400 | .0027 |
| 48000 | .85 | .15 | 98.10  | -192.28 | 192.28 | 40800 | .0024 |
| 48000 | .90 | .10 | 85.95  | -168.46 | 168.46 | 43200 | .0020 |
| 48000 | .95 | .05 | 64.99  | -127.38 | 127.38 | 45600 | .0014 |
| 49000 | .05 | .95 | 11.05  | -21.67  | 21.67  | 2450  | .0045 |
| 49000 | .10 | .90 | 22.02  | -43.17  | 43.17  | 4900  | .0045 |
| 49000 | .15 | .85 | 32.83  | -64.34  | 64.34  | 7350  | .0045 |
| 49000 | .20 | .80 | 43.38  | -85.02  | 85.02  | 9800  | .0044 |
| 49000 | .25 | .75 | 53.58  | -105.02 | 105.02 | 12250 | .0044 |
| 49000 | .30 | .70 | 63.35  | -124.16 | 124.16 | 14700 | .0043 |
| 49000 | .35 | .65 | 72.58  | -142.25 | 142.25 | 17150 | .0042 |
| 49000 | .40 | .60 | 81.15  | -159.06 | 159.06 | 19600 | .0041 |
| 49000 | .45 | .55 | 88.96  | -174.35 | 174.35 | 22050 | .0040 |
| 49000 | .50 | .50 | 95.85  | -187.87 | 187.87 | 24500 | .0039 |
| 49000 | .55 | .45 | 101.68 | -199.29 | 199.29 | 26950 | .0038 |
| 49000 | .60 | .40 | 106.25 | -208.25 | 208.25 | 29400 | .0036 |
| 49000 | .65 | .35 | 109.34 | -214.31 | 214.31 | 31850 | .0034 |
| 49000 | .70 | .30 | 110.66 | -216.89 | 216.89 | 34300 | .0032 |
| 49000 | .75 | .25 | 109.81 | -215.23 | 215.23 | 36750 | .0030 |
| 49000 | .80 | .20 | 106.25 | -208.25 | 208.25 | 39200 | .0027 |
| 49000 | .85 | .15 | 99.12  | -194.27 | 194.27 | 41650 | .0024 |
| 49000 | .90 | .10 | 86.84  | -170.21 | 170.21 | 44100 | .0020 |
| 49000 | .95 | .05 | 65.66  | -128.70 | 128.70 | 46550 | .0014 |
| 50000 | .05 | .95 | 11.17  | -21.89  | 21.89  | 2500  | .0045 |
| 50000 | .10 | .90 | 22.25  | -43.61  | 43.61  | 5000  | .0044 |
| 50000 | .15 | .85 | 33.16  | -65.00  | 65.00  | 7500  | .0044 |
| 50000 | .20 | .80 | 43.82  | -85.88  | 85.88  | 10000 | .0044 |
| 50000 | .25 | .75 | 54.13  | -106.09 | 106.09 | 12500 | .0043 |
| 50000 | .30 | .70 | 63.99  | -125.42 | 125.42 | 15000 | .0043 |
| 50000 | .35 | .65 | 73.31  | -143.69 | 143.69 | 17500 | .0042 |
| 50000 | .40 | .60 | 81.98  | -160.67 | 160.67 | 20000 | .0041 |
| 50000 | .45 | .55 | 89.86  | -176.12 | 176.12 | 22500 | .0040 |
| 50000 | .50 | .50 | 96.82  | -189.78 | 189.78 | 25000 | .0039 |
| 50000 | .55 | .45 | 102.71 | -201.31 | 201.31 | 27500 | .0037 |
| 50000 | .60 | .40 | 107.33 | -210.37 | 210.37 | 30000 | .0036 |
| 50000 | .65 | .35 | 110.45 | -216.49 | 216.49 | 32500 | .0034 |
| 50000 | .70 | .30 | 111.78 | -219.09 | 219.09 | 35000 | .0032 |
| 50000 | .75 | .25 | 110.93 | -217.42 | 217.42 | 37500 | .0030 |
| 50000 | .80 | .20 | 107.33 | -210.37 | 210.37 | 40000 | .0027 |
| 50000 | .85 | .15 | 100.12 | -196.24 | 196.24 | 42500 | .0024 |
| 50000 | .90 | .10 | 87.72  | -171.93 | 171.93 | 45000 | .0019 |
| 50000 | .95 | .05 | 66.33  | -130.01 | 130.01 | 47500 | .0014 |
| 51000 | .05 | .95 | 11.28  | -22.10  | 22.10  | 2550  | .0044 |
| 51000 | .10 | .90 | 22.47  | -44.04  | 44.04  | 5100  | .0044 |
| 51000 | .15 | .85 | 33.49  | -65.64  | 65.64  | 7650  | .0044 |
| 51000 | .20 | .80 | 44.25  | -86.74  | 86.74  | 10200 | .0043 |

|       |     |     |        |         |        |       |       |
|-------|-----|-----|--------|---------|--------|-------|-------|
| 51000 | .25 | .75 | 54.67  | -107.14 | 107.14 | 12750 | .0043 |
| 51000 | .30 | .70 | 64.63  | -126.67 | 126.67 | 15300 | .0042 |
| 51000 | .35 | .65 | 74.04  | -145.12 | 145.12 | 17850 | .0041 |
| 51000 | .40 | .60 | 82.79  | -162.27 | 162.27 | 20400 | .0041 |
| 51000 | .45 | .55 | 90.75  | -177.88 | 177.88 | 22950 | .0040 |
| 51000 | .50 | .50 | 97.79  | -191.66 | 191.66 | 25500 | .0038 |
| 51000 | .55 | .45 | 103.73 | -203.32 | 203.32 | 28050 | .0037 |
| 51000 | .60 | .40 | 108.40 | -212.46 | 212.46 | 30600 | .0035 |
| 51000 | .65 | .35 | 111.55 | -218.64 | 218.64 | 33150 | .0034 |
| 51000 | .70 | .30 | 112.89 | -221.27 | 221.27 | 35700 | .0032 |
| 51000 | .75 | .25 | 112.03 | -219.58 | 219.58 | 38250 | .0029 |
| 51000 | .80 | .20 | 108.40 | -212.46 | 212.46 | 40800 | .0027 |
| 51000 | .85 | .15 | 101.12 | -198.19 | 198.19 | 43350 | .0023 |
| 51000 | .90 | .10 | 88.59  | -173.64 | 173.64 | 45900 | .0019 |
| 51000 | .95 | .05 | 66.99  | -131.30 | 131.30 | 48450 | .0014 |
| 52000 | .05 | .95 | 11.39  | -22.32  | 22.32  | 2600  | .0044 |
| 52000 | .10 | .90 | 22.69  | -44.47  | 44.47  | 5200  | .0044 |
| 52000 | .15 | .85 | 33.82  | -66.28  | 66.28  | 7800  | .0043 |
| 52000 | .20 | .80 | 44.69  | -87.58  | 87.58  | 10400 | .0043 |
| 52000 | .25 | .75 | 55.20  | -108.19 | 108.19 | 13000 | .0042 |
| 52000 | .30 | .70 | 65.26  | -127.91 | 127.91 | 15600 | .0042 |
| 52000 | .35 | .65 | 74.76  | -146.54 | 146.54 | 18200 | .0041 |
| 52000 | .40 | .60 | 83.60  | -163.85 | 163.85 | 20800 | .0040 |
| 52000 | .45 | .55 | 91.64  | -179.61 | 179.61 | 23400 | .0039 |
| 52000 | .50 | .50 | 98.74  | -193.53 | 193.53 | 26000 | .0038 |
| 52000 | .55 | .45 | 104.75 | -205.30 | 205.30 | 28600 | .0037 |
| 52000 | .60 | .40 | 109.46 | -214.54 | 214.54 | 31200 | .0035 |
| 52000 | .65 | .35 | 112.64 | -220.77 | 220.77 | 33800 | .0033 |
| 52000 | .70 | .30 | 113.99 | -223.43 | 223.43 | 36400 | .0031 |
| 52000 | .75 | .25 | 113.12 | -221.72 | 221.72 | 39000 | .0029 |
| 52000 | .80 | .20 | 109.46 | -214.54 | 214.54 | 41600 | .0026 |
| 52000 | .85 | .15 | 102.11 | -200.13 | 200.13 | 44200 | .0023 |
| 52000 | .90 | .10 | 89.46  | -175.34 | 175.34 | 46800 | .0019 |
| 52000 | .95 | .05 | 67.64  | -132.58 | 132.58 | 49400 | .0014 |
| 53000 | .05 | .95 | 11.50  | -22.53  | 22.53  | 2650  | .0043 |
| 53000 | .10 | .90 | 22.91  | -44.90  | 44.90  | 5300  | .0043 |
| 53000 | .15 | .85 | 34.14  | -66.92  | 66.92  | 7950  | .0043 |
| 53000 | .20 | .80 | 45.11  | -88.42  | 88.42  | 10600 | .0043 |
| 53000 | .25 | .75 | 55.73  | -109.22 | 109.22 | 13250 | .0042 |
| 53000 | .30 | .70 | 65.88  | -129.13 | 129.13 | 15900 | .0041 |
| 53000 | .35 | .65 | 75.48  | -147.94 | 147.94 | 18550 | .0041 |
| 53000 | .40 | .60 | 84.40  | -165.42 | 165.42 | 21200 | .0040 |
| 53000 | .45 | .55 | 92.52  | -181.33 | 181.33 | 23850 | .0039 |
| 53000 | .50 | .50 | 99.69  | -195.39 | 195.39 | 26500 | .0038 |
| 53000 | .55 | .45 | 105.75 | -207.27 | 207.27 | 29150 | .0036 |
| 53000 | .60 | .40 | 110.50 | -216.59 | 216.59 | 31800 | .0035 |
| 53000 | .65 | .35 | 113.72 | -222.89 | 222.89 | 34450 | .0033 |
| 53000 | .70 | .30 | 115.09 | -225.57 | 225.57 | 37100 | .0031 |

|       |     |     |        |         |        |       |       |
|-------|-----|-----|--------|---------|--------|-------|-------|
| 53000 | .75 | .25 | 114.21 | -223.84 | 223.84 | 39750 | .0029 |
| 53000 | .80 | .20 | 110.50 | -216.59 | 216.59 | 42400 | .0026 |
| 53000 | .85 | .15 | 103.08 | -202.04 | 202.04 | 45050 | .0023 |
| 53000 | .90 | .10 | 90.31  | -177.02 | 177.02 | 47700 | .0019 |
| 53000 | .95 | .05 | 68.29  | -133.85 | 133.85 | 50350 | .0014 |
| 54000 | .05 | .95 | 11.60  | -22.74  | 22.74  | 2700  | .0043 |
| 54000 | .10 | .90 | 23.12  | -45.32  | 45.32  | 5400  | .0043 |
| 54000 | .15 | .85 | 34.46  | -67.55  | 67.55  | 8100  | .0043 |
| 54000 | .20 | .80 | 45.54  | -89.25  | 89.25  | 10800 | .0042 |
| 54000 | .25 | .75 | 56.25  | -110.25 | 110.25 | 13500 | .0042 |
| 54000 | .30 | .70 | 66.50  | -130.35 | 130.35 | 16200 | .0041 |
| 54000 | .35 | .65 | 76.19  | -149.33 | 149.33 | 18900 | .0040 |
| 54000 | .40 | .60 | 85.19  | -166.98 | 166.98 | 21600 | .0039 |
| 54000 | .45 | .55 | 93.38  | -183.03 | 183.03 | 24300 | .0038 |
| 54000 | .50 | .50 | 100.62 | -197.22 | 197.22 | 27000 | .0037 |
| 54000 | .55 | .45 | 106.74 | -209.21 | 209.21 | 29700 | .0036 |
| 54000 | .60 | .40 | 111.54 | -218.62 | 218.62 | 32400 | .0034 |
| 54000 | .65 | .35 | 114.79 | -224.98 | 224.98 | 35100 | .0033 |
| 54000 | .70 | .30 | 116.17 | -227.69 | 227.69 | 37800 | .0031 |
| 54000 | .75 | .25 | 115.28 | -225.95 | 225.95 | 40500 | .0028 |
| 54000 | .80 | .20 | 111.54 | -218.62 | 218.62 | 43200 | .0026 |
| 54000 | .85 | .15 | 104.05 | -203.94 | 203.94 | 45900 | .0023 |
| 54000 | .90 | .10 | 91.16  | -178.68 | 178.68 | 48600 | .0019 |
| 54000 | .95 | .05 | 68.93  | -135.11 | 135.11 | 51300 | .0013 |
| 55000 | .05 | .95 | 11.71  | -22.95  | 22.95  | 2750  | .0043 |
| 55000 | .10 | .90 | 23.33  | -45.74  | 45.74  | 5500  | .0042 |
| 55000 | .15 | .85 | 34.78  | -68.17  | 68.17  | 8250  | .0042 |
| 55000 | .20 | .80 | 45.96  | -90.07  | 90.07  | 11000 | .0042 |
| 55000 | .25 | .75 | 56.77  | -111.27 | 111.27 | 13750 | .0041 |
| 55000 | .30 | .70 | 67.12  | -131.55 | 131.55 | 16500 | .0041 |
| 55000 | .35 | .65 | 76.89  | -150.71 | 150.71 | 19250 | .0040 |
| 55000 | .40 | .60 | 85.98  | -168.51 | 168.51 | 22000 | .0039 |
| 55000 | .45 | .55 | 94.25  | -184.72 | 184.72 | 24750 | .0038 |
| 55000 | .50 | .50 | 101.55 | -199.04 | 199.04 | 27500 | .0037 |
| 55000 | .55 | .45 | 107.72 | -211.14 | 211.14 | 30250 | .0036 |
| 55000 | .60 | .40 | 112.57 | -220.64 | 220.64 | 33000 | .0034 |
| 55000 | .65 | .35 | 115.84 | -227.05 | 227.05 | 35750 | .0032 |
| 55000 | .70 | .30 | 117.24 | -229.78 | 229.78 | 38500 | .0030 |
| 55000 | .75 | .25 | 116.34 | -228.03 | 228.03 | 41250 | .0028 |
| 55000 | .80 | .20 | 112.57 | -220.64 | 220.64 | 44000 | .0026 |
| 55000 | .85 | .15 | 105.01 | -205.82 | 205.82 | 46750 | .0022 |
| 55000 | .90 | .10 | 92.00  | -180.33 | 180.33 | 49500 | .0019 |
| 55000 | .95 | .05 | 69.57  | -136.35 | 136.35 | 52250 | .0013 |
| 56000 | .05 | .95 | 11.82  | -23.16  | 23.16  | 2800  | .0042 |
| 56000 | .10 | .90 | 23.55  | -46.15  | 46.15  | 5600  | .0042 |
| 56000 | .15 | .85 | 35.09  | -68.79  | 68.79  | 8400  | .0042 |
| 56000 | .20 | .80 | 46.37  | -90.89  | 90.89  | 11200 | .0041 |
| 56000 | .25 | .75 | 57.28  | -112.27 | 112.27 | 14000 | .0041 |

|       |     |     |        |         |        |       |       |
|-------|-----|-----|--------|---------|--------|-------|-------|
| 56000 | .30 | .70 | 67.72  | -132.74 | 132.74 | 16800 | .0040 |
| 56000 | .35 | .65 | 77.59  | -152.07 | 152.07 | 19600 | .0040 |
| 56000 | .40 | .60 | 86.75  | -170.04 | 170.04 | 22400 | .0039 |
| 56000 | .45 | .55 | 95.10  | -186.39 | 186.39 | 25200 | .0038 |
| 56000 | .50 | .50 | 102.47 | -200.84 | 200.84 | 28000 | .0037 |
| 56000 | .55 | .45 | 108.70 | -213.05 | 213.05 | 30800 | .0035 |
| 56000 | .60 | .40 | 113.59 | -222.63 | 222.63 | 33600 | .0034 |
| 56000 | .65 | .35 | 116.89 | -229.11 | 229.11 | 36400 | .0032 |
| 56000 | .70 | .30 | 118.30 | -231.86 | 231.86 | 39200 | .0030 |
| 56000 | .75 | .25 | 117.39 | -230.09 | 230.09 | 42000 | .0028 |
| 56000 | .80 | .20 | 113.59 | -222.63 | 222.63 | 44800 | .0025 |
| 56000 | .85 | .15 | 105.96 | -207.68 | 207.68 | 47600 | .0022 |
| 56000 | .90 | .10 | 92.84  | -181.96 | 181.96 | 50400 | .0018 |
| 56000 | .95 | .05 | 70.20  | -137.59 | 137.59 | 53200 | .0013 |
| 57000 | .05 | .95 | 11.92  | -23.37  | 23.37  | 2850  | .0042 |
| 57000 | .10 | .90 | 23.75  | -46.56  | 46.56  | 5700  | .0042 |
| 57000 | .15 | .85 | 35.41  | -69.40  | 69.40  | 8550  | .0041 |
| 57000 | .20 | .80 | 46.78  | -91.70  | 91.70  | 11400 | .0041 |
| 57000 | .25 | .75 | 57.79  | -113.27 | 113.27 | 14250 | .0041 |
| 57000 | .30 | .70 | 68.32  | -133.92 | 133.92 | 17100 | .0040 |
| 57000 | .35 | .65 | 78.28  | -153.42 | 153.42 | 19950 | .0039 |
| 57000 | .40 | .60 | 87.53  | -171.55 | 171.55 | 22800 | .0038 |
| 57000 | .45 | .55 | 95.94  | -188.05 | 188.05 | 25650 | .0037 |
| 57000 | .50 | .50 | 103.38 | -202.63 | 202.63 | 28500 | .0036 |
| 57000 | .55 | .45 | 109.67 | -214.95 | 214.95 | 31350 | .0035 |
| 57000 | .60 | .40 | 114.60 | -224.61 | 224.61 | 34200 | .0034 |
| 57000 | .65 | .35 | 117.93 | -231.14 | 231.14 | 37050 | .0032 |
| 57000 | .70 | .30 | 119.35 | -233.92 | 233.92 | 39900 | .0030 |
| 57000 | .75 | .25 | 118.44 | -232.14 | 232.14 | 42750 | .0028 |
| 57000 | .80 | .20 | 114.60 | -224.61 | 224.61 | 45600 | .0025 |
| 57000 | .85 | .15 | 106.90 | -209.53 | 209.53 | 48450 | .0022 |
| 57000 | .90 | .10 | 93.66  | -183.57 | 183.57 | 51300 | .0018 |
| 57000 | .95 | .05 | 70.82  | -138.81 | 138.81 | 54150 | .0013 |
| 58000 | .05 | .95 | 12.03  | -23.57  | 23.57  | 2900  | .0041 |
| 58000 | .10 | .90 | 23.96  | -46.97  | 46.97  | 5800  | .0041 |
| 58000 | .15 | .85 | 35.72  | -70.00  | 70.00  | 8700  | .0041 |
| 58000 | .20 | .80 | 47.19  | -92.50  | 92.50  | 11600 | .0041 |
| 58000 | .25 | .75 | 58.30  | -114.26 | 114.26 | 14500 | .0040 |
| 58000 | .30 | .70 | 68.92  | -135.09 | 135.09 | 17400 | .0040 |
| 58000 | .35 | .65 | 78.96  | -154.76 | 154.76 | 20300 | .0039 |
| 58000 | .40 | .60 | 88.29  | -173.05 | 173.05 | 23200 | .0038 |
| 58000 | .45 | .55 | 96.78  | -189.69 | 189.69 | 26100 | .0037 |
| 58000 | .50 | .50 | 104.28 | -204.40 | 204.40 | 29000 | .0036 |
| 58000 | .55 | .45 | 110.62 | -216.82 | 216.82 | 31900 | .0035 |
| 58000 | .60 | .40 | 115.60 | -226.57 | 226.57 | 34800 | .0033 |
| 58000 | .65 | .35 | 118.96 | -233.16 | 233.16 | 37700 | .0032 |
| 58000 | .70 | .30 | 120.39 | -235.97 | 235.97 | 40600 | .0030 |
| 58000 | .75 | .25 | 119.47 | -234.16 | 234.16 | 43500 | .0027 |

|       |     |     |        |         |        |       |       |
|-------|-----|-----|--------|---------|--------|-------|-------|
| 58000 | .80 | .20 | 115.60 | -226.57 | 226.57 | 46400 | .0025 |
| 58000 | .85 | .15 | 107.84 | -211.36 | 211.36 | 49300 | .0022 |
| 58000 | .90 | .10 | 94.48  | -185.18 | 185.18 | 52200 | .0018 |
| 58000 | .95 | .05 | 71.44  | -140.02 | 140.02 | 55100 | .0013 |
| 59000 | .05 | .95 | 12.13  | -23.77  | 23.77  | 2950  | .0041 |
| 59000 | .10 | .90 | 24.17  | -47.37  | 47.37  | 5900  | .0041 |
| 59000 | .15 | .85 | 36.02  | -70.60  | 70.60  | 8850  | .0041 |
| 59000 | .20 | .80 | 47.60  | -93.29  | 93.29  | 11800 | .0040 |
| 59000 | .25 | .75 | 58.80  | -115.24 | 115.24 | 14750 | .0040 |
| 59000 | .30 | .70 | 69.51  | -136.25 | 136.25 | 17700 | .0039 |
| 59000 | .35 | .65 | 79.64  | -156.09 | 156.09 | 20650 | .0039 |
| 59000 | .40 | .60 | 89.05  | -174.53 | 174.53 | 23600 | .0038 |
| 59000 | .45 | .55 | 97.61  | -191.32 | 191.32 | 26550 | .0037 |
| 59000 | .50 | .50 | 105.18 | -206.15 | 206.15 | 29500 | .0036 |
| 59000 | .55 | .45 | 111.57 | -218.68 | 218.68 | 32450 | .0034 |
| 59000 | .60 | .40 | 116.59 | -228.52 | 228.52 | 35400 | .0033 |
| 59000 | .65 | .35 | 119.98 | -235.16 | 235.16 | 38350 | .0031 |
| 59000 | .70 | .30 | 121.43 | -237.99 | 237.99 | 41300 | .0029 |
| 59000 | .75 | .25 | 120.50 | -236.17 | 236.17 | 44250 | .0027 |
| 59000 | .80 | .20 | 116.59 | -228.52 | 228.52 | 47200 | .0025 |
| 59000 | .85 | .15 | 108.76 | -213.17 | 213.17 | 50150 | .0022 |
| 59000 | .90 | .10 | 95.29  | -186.77 | 186.77 | 53100 | .0018 |
| 59000 | .95 | .05 | 72.05  | -141.22 | 141.22 | 56050 | .0013 |
| 60000 | .05 | .95 | 12.23  | -23.97  | 23.97  | 3000  | .0041 |
| 60000 | .10 | .90 | 24.37  | -47.77  | 47.77  | 6000  | .0041 |
| 60000 | .15 | .85 | 36.33  | -71.20  | 71.20  | 9000  | .0040 |
| 60000 | .20 | .80 | 48.00  | -94.08  | 94.08  | 12000 | .0040 |
| 60000 | .25 | .75 | 59.29  | -116.21 | 116.21 | 15000 | .0040 |
| 60000 | .30 | .70 | 70.10  | -137.40 | 137.40 | 18000 | .0039 |
| 60000 | .35 | .65 | 80.31  | -157.41 | 157.41 | 21000 | .0038 |
| 60000 | .40 | .60 | 89.80  | -176.01 | 176.01 | 24000 | .0037 |
| 60000 | .45 | .55 | 98.44  | -192.93 | 192.93 | 27000 | .0036 |
| 60000 | .50 | .50 | 106.07 | -207.89 | 207.89 | 30000 | .0035 |
| 60000 | .55 | .45 | 112.51 | -220.53 | 220.53 | 33000 | .0034 |
| 60000 | .60 | .40 | 117.58 | -230.45 | 230.45 | 36000 | .0033 |
| 60000 | .65 | .35 | 120.99 | -237.15 | 237.15 | 39000 | .0031 |
| 60000 | .70 | .30 | 122.45 | -240.00 | 240.00 | 42000 | .0029 |
| 60000 | .75 | .25 | 121.51 | -238.17 | 238.17 | 45000 | .0027 |
| 60000 | .80 | .20 | 117.58 | -230.45 | 230.45 | 48000 | .0024 |
| 60000 | .85 | .15 | 109.68 | -214.97 | 214.97 | 51000 | .0022 |
| 60000 | .90 | .10 | 96.09  | -188.34 | 188.34 | 54000 | .0018 |
| 60000 | .95 | .05 | 72.66  | -142.42 | 142.42 | 57000 | .0013 |
| 61000 | .05 | .95 | 12.33  | -24.17  | 24.17  | 3050  | .0040 |
| 61000 | .10 | .90 | 24.57  | -48.17  | 48.17  | 6100  | .0040 |
| 61000 | .15 | .85 | 36.63  | -71.79  | 71.79  | 9150  | .0040 |
| 61000 | .20 | .80 | 48.40  | -94.86  | 94.86  | 12200 | .0040 |
| 61000 | .25 | .75 | 59.78  | -117.18 | 117.18 | 15250 | .0039 |
| 61000 | .30 | .70 | 70.68  | -138.54 | 138.54 | 18300 | .0039 |



|       |     |     |        |         |        |       |       |
|-------|-----|-----|--------|---------|--------|-------|-------|
| 61000 | .35 | .65 | 80.98  | -158.71 | 158.71 | 21350 | .0038 |
| 61000 | .40 | .60 | 90.55  | -177.47 | 177.47 | 24400 | .0037 |
| 61000 | .45 | .55 | 99.25  | -194.54 | 194.54 | 27450 | .0036 |
| 61000 | .50 | .50 | 106.95 | -209.61 | 209.61 | 30500 | .0035 |
| 61000 | .55 | .45 | 113.45 | -222.36 | 222.36 | 33550 | .0034 |
| 61000 | .60 | .40 | 118.55 | -232.36 | 232.36 | 36600 | .0032 |
| 61000 | .65 | .35 | 122.00 | -239.12 | 239.12 | 39650 | .0031 |
| 61000 | .70 | .30 | 123.47 | -241.99 | 241.99 | 42700 | .0029 |
| 61000 | .75 | .25 | 122.52 | -240.14 | 240.14 | 45750 | .0027 |
| 61000 | .80 | .20 | 118.55 | -232.36 | 232.36 | 48800 | .0024 |
| 61000 | .85 | .15 | 110.59 | -216.76 | 216.76 | 51850 | .0021 |
| 61000 | .90 | .10 | 96.89  | -189.91 | 189.91 | 54900 | .0018 |
| 61000 | .95 | .05 | 73.26  | -143.60 | 143.60 | 57950 | .0013 |
| 62000 | .05 | .95 | 12.43  | -24.37  | 24.37  | 3100  | .0040 |
| 62000 | .10 | .90 | 24.77  | -48.56  | 48.56  | 6200  | .0040 |
| 62000 | .15 | .85 | 36.93  | -72.38  | 72.38  | 9300  | .0040 |
| 62000 | .20 | .80 | 48.79  | -95.64  | 95.64  | 12400 | .0039 |
| 62000 | .25 | .75 | 60.27  | -118.13 | 118.13 | 15500 | .0039 |
| 62000 | .30 | .70 | 71.26  | -139.67 | 139.67 | 18600 | .0038 |
| 62000 | .35 | .65 | 81.64  | -160.01 | 160.01 | 21700 | .0038 |
| 62000 | .40 | .60 | 91.28  | -178.92 | 178.92 | 24800 | .0037 |
| 62000 | .45 | .55 | 100.06 | -196.12 | 196.12 | 27900 | .0036 |
| 62000 | .50 | .50 | 107.82 | -211.33 | 211.33 | 31000 | .0035 |
| 62000 | .55 | .45 | 114.37 | -224.17 | 224.17 | 34100 | .0034 |
| 62000 | .60 | .40 | 119.52 | -234.26 | 234.26 | 37200 | .0032 |
| 62000 | .65 | .35 | 122.99 | -241.07 | 241.07 | 40300 | .0031 |
| 62000 | .70 | .30 | 124.47 | -243.97 | 243.97 | 43400 | .0029 |
| 62000 | .75 | .25 | 123.52 | -242.10 | 242.10 | 46500 | .0027 |
| 62000 | .80 | .20 | 119.52 | -234.26 | 234.26 | 49600 | .0024 |
| 62000 | .85 | .15 | 111.49 | -218.53 | 218.53 | 52700 | .0021 |
| 62000 | .90 | .10 | 97.68  | -191.46 | 191.46 | 55800 | .0018 |
| 62000 | .95 | .05 | 73.86  | -144.77 | 144.77 | 58900 | .0013 |
| 63000 | .05 | .95 | 12.53  | -24.57  | 24.57  | 3150  | .0040 |
| 63000 | .10 | .90 | 24.97  | -48.95  | 48.95  | 6300  | .0040 |
| 63000 | .15 | .85 | 37.22  | -72.96  | 72.96  | 9450  | .0039 |
| 63000 | .20 | .80 | 49.19  | -96.40  | 96.40  | 12600 | .0039 |
| 63000 | .25 | .75 | 60.76  | -119.08 | 119.08 | 15750 | .0039 |
| 63000 | .30 | .70 | 71.83  | -140.79 | 140.79 | 18900 | .0038 |
| 63000 | .35 | .65 | 82.29  | -161.29 | 161.29 | 22050 | .0037 |
| 63000 | .40 | .60 | 92.02  | -180.35 | 180.35 | 25200 | .0037 |
| 63000 | .45 | .55 | 100.87 | -197.70 | 197.70 | 28350 | .0036 |
| 63000 | .50 | .50 | 108.69 | -213.02 | 213.02 | 31500 | .0035 |
| 63000 | .55 | .45 | 115.29 | -225.98 | 225.98 | 34650 | .0033 |
| 63000 | .60 | .40 | 120.48 | -236.14 | 236.14 | 37800 | .0032 |
| 63000 | .65 | .35 | 123.98 | -243.01 | 243.01 | 40950 | .0030 |
| 63000 | .70 | .30 | 125.47 | -245.93 | 245.93 | 44100 | .0028 |
| 63000 | .75 | .25 | 124.51 | -244.05 | 244.05 | 47250 | .0026 |
| 63000 | .80 | .20 | 120.48 | -236.14 | 236.14 | 50400 | .0024 |

|       |     |     |        |         |        |       |       |
|-------|-----|-----|--------|---------|--------|-------|-------|
| 63000 | .85 | .15 | 112.39 | -220.28 | 220.28 | 53550 | .0021 |
| 63000 | .90 | .10 | 98.47  | -192.99 | 192.99 | 56700 | .0017 |
| 63000 | .95 | .05 | 74.46  | -145.93 | 145.93 | 59850 | .0012 |
| 64000 | .05 | .95 | 12.63  | -24.76  | 24.76  | 3200  | .0039 |
| 64000 | .10 | .90 | 25.17  | -49.34  | 49.34  | 6400  | .0039 |
| 64000 | .15 | .85 | 37.52  | -73.54  | 73.54  | 9600  | .0039 |
| 64000 | .20 | .80 | 49.57  | -97.17  | 97.17  | 12800 | .0039 |
| 64000 | .25 | .75 | 61.24  | -120.02 | 120.02 | 16000 | .0038 |
| 64000 | .30 | .70 | 72.40  | -141.90 | 141.90 | 19200 | .0038 |
| 64000 | .35 | .65 | 82.94  | -162.57 | 162.57 | 22400 | .0037 |
| 64000 | .40 | .60 | 92.74  | -181.78 | 181.78 | 25600 | .0036 |
| 64000 | .45 | .55 | 101.66 | -199.26 | 199.26 | 28800 | .0035 |
| 64000 | .50 | .50 | 109.54 | -214.71 | 214.71 | 32000 | .0034 |
| 64000 | .55 | .45 | 116.20 | -227.76 | 227.76 | 35200 | .0033 |
| 64000 | .60 | .40 | 121.43 | -238.01 | 238.01 | 38400 | .0032 |
| 64000 | .65 | .35 | 124.96 | -244.93 | 244.93 | 41600 | .0030 |
| 64000 | .70 | .30 | 126.47 | -247.87 | 247.87 | 44800 | .0028 |
| 64000 | .75 | .25 | 125.50 | -245.98 | 245.98 | 48000 | .0026 |
| 64000 | .80 | .20 | 121.43 | -238.01 | 238.01 | 51200 | .0024 |
| 64000 | .85 | .15 | 113.28 | -222.02 | 222.02 | 54400 | .0021 |
| 64000 | .90 | .10 | 99.25  | -194.52 | 194.52 | 57600 | .0017 |
| 64000 | .95 | .05 | 75.04  | -147.09 | 147.09 | 60800 | .0012 |
| 65000 | .05 | .95 | 12.73  | -24.95  | 24.95  | 3250  | .0039 |
| 65000 | .10 | .90 | 25.37  | -49.72  | 49.72  | 6500  | .0039 |
| 65000 | .15 | .85 | 37.81  | -74.11  | 74.11  | 9750  | .0039 |
| 65000 | .20 | .80 | 49.96  | -97.92  | 97.92  | 13000 | .0038 |
| 65000 | .25 | .75 | 61.71  | -120.96 | 120.96 | 16250 | .0038 |
| 65000 | .30 | .70 | 72.96  | -143.01 | 143.01 | 19500 | .0037 |
| 65000 | .35 | .65 | 83.59  | -163.83 | 163.83 | 22750 | .0037 |
| 65000 | .40 | .60 | 93.47  | -183.19 | 183.19 | 26000 | .0036 |
| 65000 | .45 | .55 | 102.46 | -200.81 | 200.81 | 29250 | .0035 |
| 65000 | .50 | .50 | 110.40 | -216.38 | 216.38 | 32500 | .0034 |
| 65000 | .55 | .45 | 117.11 | -229.53 | 229.53 | 35750 | .0033 |
| 65000 | .60 | .40 | 122.38 | -239.86 | 239.86 | 39000 | .0031 |
| 65000 | .65 | .35 | 125.93 | -246.83 | 246.83 | 42250 | .0030 |
| 65000 | .70 | .30 | 127.45 | -249.80 | 249.80 | 45500 | .0028 |
| 65000 | .75 | .25 | 126.48 | -247.89 | 247.89 | 48750 | .0026 |
| 65000 | .80 | .20 | 122.38 | -239.86 | 239.86 | 52000 | .0024 |
| 65000 | .85 | .15 | 114.16 | -223.75 | 223.75 | 55250 | .0021 |
| 65000 | .90 | .10 | 100.02 | -196.03 | 196.03 | 58500 | .0017 |
| 65000 | .95 | .05 | 75.63  | -148.23 | 148.23 | 61750 | .0012 |
| 66000 | .05 | .95 | 12.83  | -25.15  | 25.15  | 3300  | .0039 |
| 66000 | .10 | .90 | 25.56  | -50.10  | 50.10  | 6600  | .0039 |
| 66000 | .15 | .85 | 38.10  | -74.68  | 74.68  | 9900  | .0038 |
| 66000 | .20 | .80 | 50.34  | -98.67  | 98.67  | 13200 | .0038 |
| 66000 | .25 | .75 | 62.19  | -121.89 | 121.89 | 16500 | .0038 |
| 66000 | .30 | .70 | 73.52  | -144.10 | 144.10 | 19800 | .0037 |
| 66000 | .35 | .65 | 84.23  | -165.09 | 165.09 | 23100 | .0036 |

|       |     |     |        |         |        |       |       |
|-------|-----|-----|--------|---------|--------|-------|-------|
| 66000 | .40 | .60 | 94.18  | -184.60 | 184.60 | 26400 | .0036 |
| 66000 | .45 | .55 | 103.24 | -202.35 | 202.35 | 29700 | .0035 |
| 66000 | .50 | .50 | 111.24 | -218.04 | 218.04 | 33000 | .0034 |
| 66000 | .55 | .45 | 118.01 | -231.29 | 231.29 | 36300 | .0033 |
| 66000 | .60 | .40 | 123.31 | -241.70 | 241.70 | 39600 | .0031 |
| 66000 | .65 | .35 | 126.90 | -248.72 | 248.72 | 42900 | .0030 |
| 66000 | .70 | .30 | 128.43 | -251.72 | 251.72 | 46200 | .0028 |
| 66000 | .75 | .25 | 127.44 | -249.79 | 249.79 | 49500 | .0026 |
| 66000 | .80 | .20 | 123.31 | -241.70 | 241.70 | 52800 | .0023 |
| 66000 | .85 | .15 | 115.03 | -225.46 | 225.46 | 56100 | .0021 |
| 66000 | .90 | .10 | 100.78 | -197.54 | 197.54 | 59400 | .0017 |
| 66000 | .95 | .05 | 76.21  | -149.37 | 149.37 | 62700 | .0012 |
| 67000 | .05 | .95 | 12.93  | -25.33  | 25.33  | 3350  | .0039 |
| 67000 | .10 | .90 | 25.75  | -50.48  | 50.48  | 6700  | .0038 |
| 67000 | .15 | .85 | 38.39  | -75.24  | 75.24  | 10050 | .0038 |
| 67000 | .20 | .80 | 50.72  | -99.42  | 99.42  | 13400 | .0038 |
| 67000 | .25 | .75 | 62.66  | -122.81 | 122.81 | 16750 | .0037 |
| 67000 | .30 | .70 | 74.08  | -145.19 | 145.19 | 20100 | .0037 |
| 67000 | .35 | .65 | 84.87  | -166.34 | 166.34 | 23450 | .0036 |
| 67000 | .40 | .60 | 94.89  | -185.99 | 185.99 | 26800 | .0035 |
| 67000 | .45 | .55 | 104.02 | -203.88 | 203.88 | 30150 | .0035 |
| 67000 | .50 | .50 | 112.08 | -219.68 | 219.68 | 33500 | .0033 |
| 67000 | .55 | .45 | 118.90 | -233.04 | 233.04 | 36850 | .0032 |
| 67000 | .60 | .40 | 124.24 | -243.52 | 243.52 | 40200 | .0031 |
| 67000 | .65 | .35 | 127.86 | -250.60 | 250.60 | 43550 | .0029 |
| 67000 | .70 | .30 | 129.40 | -253.62 | 253.62 | 46900 | .0028 |
| 67000 | .75 | .25 | 128.41 | -251.68 | 251.68 | 50250 | .0026 |
| 67000 | .80 | .20 | 124.24 | -243.52 | 243.52 | 53600 | .0023 |
| 67000 | .85 | .15 | 115.90 | -227.17 | 227.17 | 56950 | .0020 |
| 67000 | .90 | .10 | 101.54 | -199.03 | 199.03 | 60300 | .0017 |
| 67000 | .95 | .05 | 76.78  | -150.49 | 150.49 | 63650 | .0012 |
| 68000 | .05 | .95 | 13.02  | -25.52  | 25.52  | 3400  | .0038 |
| 68000 | .10 | .90 | 25.95  | -50.85  | 50.85  | 6800  | .0038 |
| 68000 | .15 | .85 | 38.67  | -75.80  | 75.80  | 10200 | .0038 |
| 68000 | .20 | .80 | 51.10  | -100.16 | 100.16 | 13600 | .0038 |
| 68000 | .25 | .75 | 63.12  | -123.72 | 123.72 | 17000 | .0037 |
| 68000 | .30 | .70 | 74.63  | -146.27 | 146.27 | 20400 | .0037 |
| 68000 | .35 | .65 | 85.50  | -167.57 | 167.57 | 23800 | .0036 |
| 68000 | .40 | .60 | 95.60  | -187.37 | 187.37 | 27200 | .0035 |
| 68000 | .45 | .55 | 104.79 | -205.39 | 205.39 | 30600 | .0034 |
| 68000 | .50 | .50 | 112.92 | -221.32 | 221.32 | 34000 | .0033 |
| 68000 | .55 | .45 | 119.78 | -234.77 | 234.77 | 37400 | .0032 |
| 68000 | .60 | .40 | 125.17 | -245.33 | 245.33 | 40800 | .0031 |
| 68000 | .65 | .35 | 128.81 | -252.46 | 252.46 | 44200 | .0029 |
| 68000 | .70 | .30 | 130.36 | -255.50 | 255.50 | 47600 | .0027 |
| 68000 | .75 | .25 | 129.36 | -253.55 | 253.55 | 51000 | .0025 |
| 68000 | .80 | .20 | 125.17 | -245.33 | 245.33 | 54400 | .0023 |
| 68000 | .85 | .15 | 116.76 | -228.86 | 228.86 | 57800 | .0020 |

|       |     |     |        |         |        |       |       |
|-------|-----|-----|--------|---------|--------|-------|-------|
| 68000 | .90 | .10 | 102.30 | -200.51 | 200.51 | 61200 | .0017 |
| 68000 | .95 | .05 | 77.35  | -151.61 | 151.61 | 64600 | .0012 |
| 69000 | .05 | .95 | 13.12  | -25.71  | 25.71  | 3450  | .0038 |
| 69000 | .10 | .90 | 26.14  | -51.23  | 51.23  | 6900  | .0038 |
| 69000 | .15 | .85 | 38.96  | -76.35  | 76.35  | 10350 | .0038 |
| 69000 | .20 | .80 | 51.47  | -100.89 | 100.89 | 13800 | .0037 |
| 69000 | .25 | .75 | 63.58  | -124.63 | 124.63 | 17250 | .0037 |
| 69000 | .30 | .70 | 75.17  | -147.34 | 147.34 | 20700 | .0036 |
| 69000 | .35 | .65 | 86.12  | -168.80 | 168.80 | 24150 | .0036 |
| 69000 | .40 | .60 | 96.30  | -188.75 | 188.75 | 27600 | .0035 |
| 69000 | .45 | .55 | 105.56 | -206.90 | 206.90 | 31050 | .0034 |
| 69000 | .50 | .50 | 113.74 | -222.94 | 222.94 | 34500 | .0033 |
| 69000 | .55 | .45 | 120.66 | -236.49 | 236.49 | 37950 | .0032 |
| 69000 | .60 | .40 | 126.09 | -247.13 | 247.13 | 41400 | .0030 |
| 69000 | .65 | .35 | 129.75 | -254.31 | 254.31 | 44850 | .0029 |
| 69000 | .70 | .30 | 131.31 | -257.37 | 257.37 | 48300 | .0027 |
| 69000 | .75 | .25 | 130.31 | -255.41 | 255.41 | 51750 | .0025 |
| 69000 | .80 | .20 | 126.09 | -247.13 | 247.13 | 55200 | .0023 |
| 69000 | .85 | .15 | 117.62 | -230.53 | 230.53 | 58650 | .0020 |
| 69000 | .90 | .10 | 103.05 | -201.98 | 201.98 | 62100 | .0017 |
| 69000 | .95 | .05 | 77.92  | -152.72 | 152.72 | 65550 | .0012 |
| 70000 | .05 | .95 | 13.21  | -25.90  | 25.90  | 3500  | .0038 |
| 70000 | .10 | .90 | 26.32  | -51.60  | 51.60  | 7000  | .0038 |
| 70000 | .15 | .85 | 39.24  | -76.91  | 76.91  | 10500 | .0037 |
| 70000 | .20 | .80 | 51.85  | -101.62 | 101.62 | 14000 | .0037 |
| 70000 | .25 | .75 | 64.04  | -125.53 | 125.53 | 17500 | .0037 |
| 70000 | .30 | .70 | 75.72  | -148.40 | 148.40 | 21000 | .0036 |
| 70000 | .35 | .65 | 86.74  | -170.02 | 170.02 | 24500 | .0035 |
| 70000 | .40 | .60 | 96.99  | -190.11 | 190.11 | 28000 | .0035 |
| 70000 | .45 | .55 | 106.32 | -208.39 | 208.39 | 31500 | .0034 |
| 70000 | .50 | .50 | 114.56 | -224.55 | 224.55 | 35000 | .0033 |
| 70000 | .55 | .45 | 121.53 | -238.20 | 238.20 | 38500 | .0032 |
| 70000 | .60 | .40 | 127.00 | -248.91 | 248.91 | 42000 | .0030 |
| 70000 | .65 | .35 | 130.69 | -256.15 | 256.15 | 45500 | .0029 |
| 70000 | .70 | .30 | 132.26 | -259.23 | 259.23 | 49000 | .0027 |
| 70000 | .75 | .25 | 131.25 | -257.25 | 257.25 | 52500 | .0025 |
| 70000 | .80 | .20 | 127.00 | -248.91 | 248.91 | 56000 | .0023 |
| 70000 | .85 | .15 | 118.47 | -232.20 | 232.20 | 59500 | .0020 |
| 70000 | .90 | .10 | 103.79 | -203.43 | 203.43 | 63000 | .0016 |
| 70000 | .95 | .05 | 78.48  | -153.83 | 153.83 | 66500 | .0012 |
| 71000 | .05 | .95 | 13.31  | -26.08  | 26.08  | 3550  | .0037 |
| 71000 | .10 | .90 | 26.51  | -51.96  | 51.96  | 7100  | .0037 |
| 71000 | .15 | .85 | 39.52  | -77.45  | 77.45  | 10650 | .0037 |
| 71000 | .20 | .80 | 52.21  | -102.34 | 102.34 | 14200 | .0037 |
| 71000 | .25 | .75 | 64.50  | -126.42 | 126.42 | 17750 | .0036 |
| 71000 | .30 | .70 | 76.26  | -149.46 | 149.46 | 21300 | .0036 |
| 71000 | .35 | .65 | 87.36  | -171.23 | 171.23 | 24850 | .0035 |
| 71000 | .40 | .60 | 97.69  | -191.46 | 191.46 | 28400 | .0034 |

|       |     |     |        |         |        |       |       |
|-------|-----|-----|--------|---------|--------|-------|-------|
| 71000 | .45 | .55 | 107.08 | -209.88 | 209.88 | 31950 | .0034 |
| 71000 | .50 | .50 | 115.38 | -226.14 | 226.14 | 35500 | .0033 |
| 71000 | .55 | .45 | 122.40 | -239.89 | 239.89 | 39050 | .0031 |
| 71000 | .60 | .40 | 127.90 | -250.68 | 250.68 | 42600 | .0030 |
| 71000 | .65 | .35 | 131.62 | -257.97 | 257.97 | 46150 | .0029 |
| 71000 | .70 | .30 | 133.20 | -261.08 | 261.08 | 49700 | .0027 |
| 71000 | .75 | .25 | 132.18 | -259.08 | 259.08 | 53250 | .0025 |
| 71000 | .80 | .20 | 127.90 | -250.68 | 250.68 | 56800 | .0023 |
| 71000 | .85 | .15 | 119.31 | -233.85 | 233.85 | 60350 | .0020 |
| 71000 | .90 | .10 | 104.53 | -204.88 | 204.88 | 63900 | .0016 |
| 71000 | .95 | .05 | 79.04  | -154.92 | 154.92 | 67450 | .0012 |
| 72000 | .05 | .95 | 13.40  | -26.26  | 26.26  | 3600  | .0037 |
| 72000 | .10 | .90 | 26.70  | -52.33  | 52.33  | 7200  | .0037 |
| 72000 | .15 | .85 | 39.79  | -78.00  | 78.00  | 10800 | .0037 |
| 72000 | .20 | .80 | 52.58  | -103.06 | 103.06 | 14400 | .0037 |
| 72000 | .25 | .75 | 64.95  | -127.31 | 127.31 | 18000 | .0036 |
| 72000 | .30 | .70 | 76.79  | -150.51 | 150.51 | 21600 | .0036 |
| 72000 | .35 | .65 | 87.97  | -172.43 | 172.43 | 25200 | .0035 |
| 72000 | .40 | .60 | 98.37  | -192.81 | 192.81 | 28800 | .0034 |
| 72000 | .45 | .55 | 107.83 | -211.35 | 211.35 | 32400 | .0033 |
| 72000 | .50 | .50 | 116.19 | -227.73 | 227.73 | 36000 | .0032 |
| 72000 | .55 | .45 | 123.25 | -241.58 | 241.58 | 39600 | .0031 |
| 72000 | .60 | .40 | 128.80 | -252.44 | 252.44 | 43200 | .0030 |
| 72000 | .65 | .35 | 132.54 | -259.78 | 259.78 | 46800 | .0028 |
| 72000 | .70 | .30 | 134.14 | -262.91 | 262.91 | 50400 | .0027 |
| 72000 | .75 | .25 | 133.11 | -260.90 | 260.90 | 54000 | .0025 |
| 72000 | .80 | .20 | 128.80 | -252.44 | 252.44 | 57600 | .0022 |
| 72000 | .85 | .15 | 120.15 | -235.49 | 235.49 | 61200 | .0020 |
| 72000 | .90 | .10 | 105.27 | -206.32 | 206.32 | 64800 | .0016 |
| 72000 | .95 | .05 | 79.60  | -156.01 | 156.01 | 68400 | .0012 |
| 73000 | .05 | .95 | 13.49  | -26.45  | 26.45  | 3650  | .0037 |
| 73000 | .10 | .90 | 26.88  | -52.69  | 52.69  | 7300  | .0037 |
| 73000 | .15 | .85 | 40.07  | -78.54  | 78.54  | 10950 | .0037 |
| 73000 | .20 | .80 | 52.95  | -103.77 | 103.77 | 14600 | .0036 |
| 73000 | .25 | .75 | 65.40  | -128.19 | 128.19 | 18250 | .0036 |
| 73000 | .30 | .70 | 77.32  | -151.55 | 151.55 | 21900 | .0035 |
| 73000 | .35 | .65 | 88.58  | -173.62 | 173.62 | 25550 | .0035 |
| 73000 | .40 | .60 | 99.05  | -194.14 | 194.14 | 29200 | .0034 |
| 73000 | .45 | .55 | 108.58 | -212.81 | 212.81 | 32850 | .0033 |
| 73000 | .50 | .50 | 116.99 | -229.31 | 229.31 | 36500 | .0032 |
| 73000 | .55 | .45 | 124.11 | -243.25 | 243.25 | 40150 | .0031 |
| 73000 | .60 | .40 | 129.69 | -254.19 | 254.19 | 43800 | .0030 |
| 73000 | .65 | .35 | 133.46 | -261.58 | 261.58 | 47450 | .0028 |
| 73000 | .70 | .30 | 135.07 | -264.73 | 264.73 | 51100 | .0026 |
| 73000 | .75 | .25 | 134.03 | -262.70 | 262.70 | 54750 | .0024 |
| 73000 | .80 | .20 | 129.69 | -254.19 | 254.19 | 58400 | .0022 |
| 73000 | .85 | .15 | 120.98 | -237.12 | 237.12 | 62050 | .0019 |
| 73000 | .90 | .10 | 105.99 | -207.75 | 207.75 | 65700 | .0016 |

|       |     |     |        |         |        |       |       |
|-------|-----|-----|--------|---------|--------|-------|-------|
| 73000 | .95 | .05 | 80.15  | -157.09 | 157.09 | 69350 | .0012 |
| 74000 | .05 | .95 | 13.58  | -26.63  | 26.63  | 3700  | .0037 |
| 74000 | .10 | .90 | 27.07  | -53.05  | 53.05  | 7400  | .0037 |
| 74000 | .15 | .85 | 40.34  | -79.07  | 79.07  | 11100 | .0036 |
| 74000 | .20 | .80 | 53.31  | -104.48 | 104.48 | 14800 | .0036 |
| 74000 | .25 | .75 | 65.85  | -129.06 | 129.06 | 18500 | .0036 |
| 74000 | .30 | .70 | 77.85  | -152.59 | 152.59 | 22200 | .0035 |
| 74000 | .35 | .65 | 89.19  | -174.81 | 174.81 | 25900 | .0034 |
| 74000 | .40 | .60 | 99.73  | -195.47 | 195.47 | 29600 | .0034 |
| 74000 | .45 | .55 | 109.32 | -214.26 | 214.26 | 33300 | .0033 |
| 74000 | .50 | .50 | 117.79 | -230.87 | 230.87 | 37000 | .0032 |
| 74000 | .55 | .45 | 124.95 | -244.91 | 244.91 | 40700 | .0031 |
| 74000 | .60 | .40 | 130.57 | -255.93 | 255.93 | 44400 | .0029 |
| 74000 | .65 | .35 | 134.37 | -263.37 | 263.37 | 48100 | .0028 |
| 74000 | .70 | .30 | 135.99 | -266.54 | 266.54 | 51800 | .0026 |
| 74000 | .75 | .25 | 134.95 | -264.50 | 264.50 | 55500 | .0024 |
| 74000 | .80 | .20 | 130.57 | -255.93 | 255.93 | 59200 | .0022 |
| 74000 | .85 | .15 | 121.81 | -238.74 | 238.74 | 62900 | .0019 |
| 74000 | .90 | .10 | 106.72 | -209.17 | 209.17 | 66600 | .0016 |
| 74000 | .95 | .05 | 80.69  | -158.16 | 158.16 | 70300 | .0011 |
| 75000 | .05 | .95 | 13.68  | -26.80  | 26.80  | 3750  | .0036 |
| 75000 | .10 | .90 | 27.25  | -53.41  | 53.41  | 7500  | .0036 |
| 75000 | .15 | .85 | 40.61  | -79.60  | 79.60  | 11250 | .0036 |
| 75000 | .20 | .80 | 53.67  | -105.18 | 105.18 | 15000 | .0036 |
| 75000 | .25 | .75 | 66.29  | -129.93 | 129.93 | 18750 | .0035 |
| 75000 | .30 | .70 | 78.37  | -153.61 | 153.61 | 22500 | .0035 |
| 75000 | .35 | .65 | 89.79  | -175.99 | 175.99 | 26250 | .0034 |
| 75000 | .40 | .60 | 100.40 | -196.78 | 196.78 | 30000 | .0033 |
| 75000 | .45 | .55 | 110.05 | -215.71 | 215.71 | 33750 | .0033 |
| 75000 | .50 | .50 | 118.59 | -232.43 | 232.43 | 37500 | .0032 |
| 75000 | .55 | .45 | 125.80 | -246.56 | 246.56 | 41250 | .0030 |
| 75000 | .60 | .40 | 131.45 | -257.65 | 257.65 | 45000 | .0029 |
| 75000 | .65 | .35 | 135.28 | -265.14 | 265.14 | 48750 | .0028 |
| 75000 | .70 | .30 | 136.90 | -268.33 | 268.33 | 52500 | .0026 |
| 75000 | .75 | .25 | 135.86 | -266.28 | 266.28 | 56250 | .0024 |
| 75000 | .80 | .20 | 131.45 | -257.65 | 257.65 | 60000 | .0022 |
| 75000 | .85 | .15 | 122.63 | -240.35 | 240.35 | 63750 | .0019 |
| 75000 | .90 | .10 | 107.44 | -210.57 | 210.57 | 67500 | .0016 |
| 75000 | .95 | .05 | 81.24  | -159.23 | 159.23 | 71250 | .0011 |
| 76000 | .05 | .95 | 13.77  | -26.98  | 26.98  | 3800  | .0036 |
| 76000 | .10 | .90 | 27.43  | -53.76  | 53.76  | 7600  | .0036 |
| 76000 | .15 | .85 | 40.88  | -80.13  | 80.13  | 11400 | .0036 |
| 76000 | .20 | .80 | 54.02  | -105.88 | 105.88 | 15200 | .0036 |
| 76000 | .25 | .75 | 66.73  | -130.79 | 130.79 | 19000 | .0035 |
| 76000 | .30 | .70 | 78.89  | -154.63 | 154.63 | 22800 | .0035 |
| 76000 | .35 | .65 | 90.39  | -177.16 | 177.16 | 26600 | .0034 |
| 76000 | .40 | .60 | 101.07 | -198.09 | 198.09 | 30400 | .0033 |
| 76000 | .45 | .55 | 110.79 | -217.14 | 217.14 | 34200 | .0032 |

|       |     |     |        |         |        |       |       |
|-------|-----|-----|--------|---------|--------|-------|-------|
| 76000 | .50 | .50 | 119.37 | -233.97 | 233.97 | 38000 | .0031 |
| 76000 | .55 | .45 | 126.63 | -248.20 | 248.20 | 41800 | .0030 |
| 76000 | .60 | .40 | 132.33 | -259.36 | 259.36 | 45600 | .0029 |
| 76000 | .65 | .35 | 136.17 | -266.90 | 266.90 | 49400 | .0028 |
| 76000 | .70 | .30 | 137.81 | -270.11 | 270.11 | 53200 | .0026 |
| 76000 | .75 | .25 | 136.76 | -268.05 | 268.05 | 57000 | .0024 |
| 76000 | .80 | .20 | 132.33 | -259.36 | 259.36 | 60800 | .0022 |
| 76000 | .85 | .15 | 123.44 | -241.94 | 241.94 | 64600 | .0019 |
| 76000 | .90 | .10 | 108.15 | -211.97 | 211.97 | 68400 | .0016 |
| 76000 | .95 | .05 | 81.78  | -160.28 | 160.28 | 72200 | .0011 |
| 77000 | .05 | .95 | 13.86  | -27.16  | 27.16  | 3850  | .0036 |
| 77000 | .10 | .90 | 27.61  | -54.12  | 54.12  | 7700  | .0036 |
| 77000 | .15 | .85 | 41.15  | -80.66  | 80.66  | 11550 | .0036 |
| 77000 | .20 | .80 | 54.38  | -106.58 | 106.58 | 15400 | .0035 |
| 77000 | .25 | .75 | 67.17  | -131.65 | 131.65 | 19250 | .0035 |
| 77000 | .30 | .70 | 79.41  | -155.65 | 155.65 | 23100 | .0034 |
| 77000 | .35 | .65 | 90.98  | -178.32 | 178.32 | 26950 | .0034 |
| 77000 | .40 | .60 | 101.73 | -199.39 | 199.39 | 30800 | .0033 |
| 77000 | .45 | .55 | 111.51 | -218.56 | 218.56 | 34650 | .0032 |
| 77000 | .50 | .50 | 120.16 | -235.51 | 235.51 | 38500 | .0031 |
| 77000 | .55 | .45 | 127.46 | -249.83 | 249.83 | 42350 | .0030 |
| 77000 | .60 | .40 | 133.19 | -261.06 | 261.06 | 46200 | .0029 |
| 77000 | .65 | .35 | 137.07 | -268.65 | 268.65 | 50050 | .0027 |
| 77000 | .70 | .30 | 138.72 | -271.88 | 271.88 | 53900 | .0026 |
| 77000 | .75 | .25 | 137.66 | -269.81 | 269.81 | 57750 | .0024 |
| 77000 | .80 | .20 | 133.19 | -261.06 | 261.06 | 61600 | .0022 |
| 77000 | .85 | .15 | 124.25 | -243.53 | 243.53 | 65450 | .0019 |
| 77000 | .90 | .10 | 108.86 | -213.36 | 213.36 | 69300 | .0016 |
| 77000 | .95 | .05 | 82.31  | -161.33 | 161.33 | 73150 | .0011 |
| 78000 | .05 | .95 | 13.95  | -27.34  | 27.34  | 3900  | .0036 |
| 78000 | .10 | .90 | 27.79  | -54.47  | 54.47  | 7800  | .0036 |
| 78000 | .15 | .85 | 41.42  | -81.18  | 81.18  | 11700 | .0035 |
| 78000 | .20 | .80 | 54.73  | -107.27 | 107.27 | 15600 | .0035 |
| 78000 | .25 | .75 | 67.60  | -132.50 | 132.50 | 19500 | .0035 |
| 78000 | .30 | .70 | 79.93  | -156.66 | 156.66 | 23400 | .0034 |
| 78000 | .35 | .65 | 91.57  | -179.47 | 179.47 | 27300 | .0034 |
| 78000 | .40 | .60 | 102.39 | -200.68 | 200.68 | 31200 | .0033 |
| 78000 | .45 | .55 | 112.23 | -219.98 | 219.98 | 35100 | .0032 |
| 78000 | .50 | .50 | 120.93 | -237.03 | 237.03 | 39000 | .0031 |
| 78000 | .55 | .45 | 128.29 | -251.44 | 251.44 | 42900 | .0030 |
| 78000 | .60 | .40 | 134.06 | -262.75 | 262.75 | 46800 | .0029 |
| 78000 | .65 | .35 | 137.95 | -270.39 | 270.39 | 50700 | .0027 |
| 78000 | .70 | .30 | 139.61 | -273.64 | 273.64 | 54600 | .0026 |
| 78000 | .75 | .25 | 138.55 | -271.55 | 271.55 | 58500 | .0024 |
| 78000 | .80 | .20 | 134.06 | -262.75 | 262.75 | 62400 | .0021 |
| 78000 | .85 | .15 | 125.05 | -245.11 | 245.11 | 66300 | .0019 |
| 78000 | .90 | .10 | 109.56 | -214.74 | 214.74 | 70200 | .0016 |
| 78000 | .95 | .05 | 82.85  | -162.38 | 162.38 | 74100 | .0011 |

|       |     |     |        |         |        |       |       |
|-------|-----|-----|--------|---------|--------|-------|-------|
| 79000 | .05 | .95 | 14.04  | -27.51  | 27.51  | 3950  | .0036 |
| 79000 | .10 | .90 | 27.97  | -54.81  | 54.81  | 7900  | .0035 |
| 79000 | .15 | .85 | 41.68  | -81.70  | 81.70  | 11850 | .0035 |
| 79000 | .20 | .80 | 55.08  | -107.95 | 107.95 | 15800 | .0035 |
| 79000 | .25 | .75 | 68.04  | -133.35 | 133.35 | 19750 | .0034 |
| 79000 | .30 | .70 | 80.44  | -157.66 | 157.66 | 23700 | .0034 |
| 79000 | .35 | .65 | 92.15  | -180.62 | 180.62 | 27650 | .0033 |
| 79000 | .40 | .60 | 103.04 | -201.96 | 201.96 | 31600 | .0033 |
| 79000 | .45 | .55 | 112.95 | -221.38 | 221.38 | 35550 | .0032 |
| 79000 | .50 | .50 | 121.71 | -238.54 | 238.54 | 39500 | .0031 |
| 79000 | .55 | .45 | 129.11 | -253.05 | 253.05 | 43450 | .0030 |
| 79000 | .60 | .40 | 134.91 | -264.43 | 264.43 | 47400 | .0028 |
| 79000 | .65 | .35 | 138.84 | -272.12 | 272.12 | 51350 | .0027 |
| 79000 | .70 | .30 | 140.51 | -275.39 | 275.39 | 55300 | .0025 |
| 79000 | .75 | .25 | 139.43 | -273.29 | 273.29 | 59250 | .0024 |
| 79000 | .80 | .20 | 134.91 | -264.43 | 264.43 | 63200 | .0021 |
| 79000 | .85 | .15 | 125.85 | -246.67 | 246.67 | 67150 | .0019 |
| 79000 | .90 | .10 | 110.26 | -216.12 | 216.12 | 71100 | .0016 |
| 79000 | .95 | .05 | 83.38  | -163.42 | 163.42 | 75050 | .0011 |
| 80000 | .05 | .95 | 14.12  | -27.68  | 27.68  | 4000  | .0035 |
| 80000 | .10 | .90 | 28.14  | -55.16  | 55.16  | 8000  | .0035 |
| 80000 | .15 | .85 | 41.95  | -82.21  | 82.21  | 12000 | .0035 |
| 80000 | .20 | .80 | 55.43  | -108.63 | 108.63 | 16000 | .0035 |
| 80000 | .25 | .75 | 68.47  | -134.19 | 134.19 | 20000 | .0034 |
| 80000 | .30 | .70 | 80.94  | -158.65 | 158.65 | 24000 | .0034 |
| 80000 | .35 | .65 | 92.73  | -181.76 | 181.76 | 28000 | .0033 |
| 80000 | .40 | .60 | 103.69 | -203.24 | 203.24 | 32000 | .0032 |
| 80000 | .45 | .55 | 113.66 | -222.78 | 222.78 | 36000 | .0032 |
| 80000 | .50 | .50 | 122.47 | -240.05 | 240.05 | 40000 | .0031 |
| 80000 | .55 | .45 | 129.92 | -254.65 | 254.65 | 44000 | .0030 |
| 80000 | .60 | .40 | 135.76 | -266.10 | 266.10 | 48000 | .0028 |
| 80000 | .65 | .35 | 139.71 | -273.84 | 273.84 | 52000 | .0027 |
| 80000 | .70 | .30 | 141.39 | -277.13 | 277.13 | 56000 | .0025 |
| 80000 | .75 | .25 | 140.31 | -275.01 | 275.01 | 60000 | .0023 |
| 80000 | .80 | .20 | 135.76 | -266.10 | 266.10 | 64000 | .0021 |
| 80000 | .85 | .15 | 126.65 | -248.23 | 248.23 | 68000 | .0019 |
| 80000 | .90 | .10 | 110.96 | -217.48 | 217.48 | 72000 | .0015 |
| 80000 | .95 | .05 | 83.90  | -164.45 | 164.45 | 76000 | .0011 |
| 81000 | .05 | .95 | 14.21  | -27.86  | 27.86  | 4050  | .0035 |
| 81000 | .10 | .90 | 28.32  | -55.50  | 55.50  | 8100  | .0035 |
| 81000 | .15 | .85 | 42.21  | -82.73  | 82.73  | 12150 | .0035 |
| 81000 | .20 | .80 | 55.77  | -109.31 | 109.31 | 16200 | .0034 |
| 81000 | .25 | .75 | 68.89  | -135.03 | 135.03 | 20250 | .0034 |
| 81000 | .30 | .70 | 81.45  | -159.64 | 159.64 | 24300 | .0034 |
| 81000 | .35 | .65 | 93.31  | -182.89 | 182.89 | 28350 | .0033 |
| 81000 | .40 | .60 | 104.34 | -204.50 | 204.50 | 32400 | .0032 |
| 81000 | .45 | .55 | 114.37 | -224.17 | 224.17 | 36450 | .0031 |
| 81000 | .50 | .50 | 123.24 | -241.55 | 241.55 | 40500 | .0030 |



|       |     |     |        |         |        |       |       |
|-------|-----|-----|--------|---------|--------|-------|-------|
| 81000 | .55 | .45 | 130.73 | -256.23 | 256.23 | 44550 | .0029 |
| 81000 | .60 | .40 | 136.61 | -267.76 | 267.76 | 48600 | .0028 |
| 81000 | .65 | .35 | 140.58 | -275.54 | 275.54 | 52650 | .0027 |
| 81000 | .70 | .30 | 142.27 | -278.86 | 278.86 | 56700 | .0025 |
| 81000 | .75 | .25 | 141.19 | -276.73 | 276.73 | 60750 | .0023 |
| 81000 | .80 | .20 | 136.61 | -267.76 | 267.76 | 64800 | .0021 |
| 81000 | .85 | .15 | 127.44 | -249.78 | 249.78 | 68850 | .0019 |
| 81000 | .90 | .10 | 111.65 | -218.84 | 218.84 | 72900 | .0015 |
| 81000 | .95 | .05 | 84.42  | -165.47 | 165.47 | 76950 | .0011 |
| 82000 | .05 | .95 | 14.30  | -28.03  | 28.03  | 4100  | .0035 |
| 82000 | .10 | .90 | 28.49  | -55.84  | 55.84  | 8200  | .0035 |
| 82000 | .15 | .85 | 42.47  | -83.24  | 83.24  | 12300 | .0035 |
| 82000 | .20 | .80 | 56.11  | -109.98 | 109.98 | 16400 | .0034 |
| 82000 | .25 | .75 | 69.32  | -135.86 | 135.86 | 20500 | .0034 |
| 82000 | .30 | .70 | 81.95  | -160.62 | 160.62 | 24600 | .0033 |
| 82000 | .35 | .65 | 93.89  | -184.02 | 184.02 | 28700 | .0033 |
| 82000 | .40 | .60 | 104.98 | -205.76 | 205.76 | 32800 | .0032 |
| 82000 | .45 | .55 | 115.08 | -225.55 | 225.55 | 36900 | .0031 |
| 82000 | .50 | .50 | 124.00 | -243.03 | 243.03 | 41000 | .0030 |
| 82000 | .55 | .45 | 131.54 | -257.81 | 257.81 | 45100 | .0029 |
| 82000 | .60 | .40 | 137.45 | -269.40 | 269.40 | 49200 | .0028 |
| 82000 | .65 | .35 | 141.45 | -277.24 | 277.24 | 53300 | .0027 |
| 82000 | .70 | .30 | 143.15 | -280.57 | 280.57 | 57400 | .0025 |
| 82000 | .75 | .25 | 142.06 | -278.43 | 278.43 | 61500 | .0023 |
| 82000 | .80 | .20 | 137.45 | -269.40 | 269.40 | 65600 | .0021 |
| 82000 | .85 | .15 | 128.22 | -251.31 | 251.31 | 69700 | .0018 |
| 82000 | .90 | .10 | 112.34 | -220.18 | 220.18 | 73800 | .0015 |
| 82000 | .95 | .05 | 84.94  | -166.49 | 166.49 | 77900 | .0011 |
| 83000 | .05 | .95 | 14.39  | -28.20  | 28.20  | 4150  | .0035 |
| 83000 | .10 | .90 | 28.67  | -56.18  | 56.18  | 8300  | .0035 |
| 83000 | .15 | .85 | 42.73  | -83.74  | 83.74  | 12450 | .0034 |
| 83000 | .20 | .80 | 56.46  | -110.65 | 110.65 | 16600 | .0034 |
| 83000 | .25 | .75 | 69.74  | -136.68 | 136.68 | 20750 | .0034 |
| 83000 | .30 | .70 | 82.45  | -161.60 | 161.60 | 24900 | .0033 |
| 83000 | .35 | .65 | 94.46  | -185.13 | 185.13 | 29050 | .0033 |
| 83000 | .40 | .60 | 105.62 | -207.01 | 207.01 | 33200 | .0032 |
| 83000 | .45 | .55 | 115.78 | -226.92 | 226.92 | 37350 | .0031 |
| 83000 | .50 | .50 | 124.75 | -244.51 | 244.51 | 41500 | .0030 |
| 83000 | .55 | .45 | 132.33 | -259.38 | 259.38 | 45650 | .0029 |
| 83000 | .60 | .40 | 138.29 | -271.04 | 271.04 | 49800 | .0028 |
| 83000 | .65 | .35 | 142.31 | -278.92 | 278.92 | 53950 | .0026 |
| 83000 | .70 | .30 | 144.02 | -282.28 | 282.28 | 58100 | .0025 |
| 83000 | .75 | .25 | 142.92 | -280.12 | 280.12 | 62250 | .0023 |
| 83000 | .80 | .20 | 138.29 | -271.04 | 271.04 | 66400 | .0021 |
| 83000 | .85 | .15 | 129.00 | -252.84 | 252.84 | 70550 | .0018 |
| 83000 | .90 | .10 | 113.02 | -221.52 | 221.52 | 74700 | .0015 |
| 83000 | .95 | .05 | 85.46  | -167.50 | 167.50 | 78850 | .0011 |
| 84000 | .05 | .95 | 14.47  | -28.37  | 28.37  | 4200  | .0034 |

|       |     |     |        |         |        |       |       |
|-------|-----|-----|--------|---------|--------|-------|-------|
| 84000 | .10 | .90 | 28.84  | -56.52  | 56.52  | 8400  | .0034 |
| 84000 | .15 | .85 | 42.98  | -84.25  | 84.25  | 12600 | .0034 |
| 84000 | .20 | .80 | 56.79  | -111.32 | 111.32 | 16800 | .0034 |
| 84000 | .25 | .75 | 70.16  | -137.51 | 137.51 | 21000 | .0033 |
| 84000 | .30 | .70 | 82.94  | -162.57 | 162.57 | 25200 | .0033 |
| 84000 | .35 | .65 | 95.02  | -186.25 | 186.25 | 29400 | .0032 |
| 84000 | .40 | .60 | 106.25 | -208.25 | 208.25 | 33600 | .0032 |
| 84000 | .45 | .55 | 116.47 | -228.28 | 228.28 | 37800 | .0031 |
| 84000 | .50 | .50 | 125.50 | -245.98 | 245.98 | 42000 | .0030 |
| 84000 | .55 | .45 | 133.13 | -260.93 | 260.93 | 46200 | .0029 |
| 84000 | .60 | .40 | 139.12 | -272.67 | 272.67 | 50400 | .0028 |
| 84000 | .65 | .35 | 143.16 | -280.60 | 280.60 | 54600 | .0026 |
| 84000 | .70 | .30 | 144.88 | -283.97 | 283.97 | 58800 | .0025 |
| 84000 | .75 | .25 | 143.78 | -281.80 | 281.80 | 63000 | .0023 |
| 84000 | .80 | .20 | 139.12 | -272.67 | 272.67 | 67200 | .0021 |
| 84000 | .85 | .15 | 129.77 | -254.36 | 254.36 | 71400 | .0018 |
| 84000 | .90 | .10 | 113.70 | -222.85 | 222.85 | 75600 | .0015 |
| 84000 | .95 | .05 | 85.97  | -168.51 | 168.51 | 79800 | .0011 |
| 85000 | .05 | .95 | 14.56  | -28.54  | 28.54  | 4250  | .0034 |
| 85000 | .10 | .90 | 29.01  | -56.86  | 56.86  | 8500  | .0034 |
| 85000 | .15 | .85 | 43.24  | -84.75  | 84.75  | 12750 | .0034 |
| 85000 | .20 | .80 | 57.13  | -111.98 | 111.98 | 17000 | .0034 |
| 85000 | .25 | .75 | 70.57  | -138.32 | 138.32 | 21250 | .0033 |
| 85000 | .30 | .70 | 83.44  | -163.53 | 163.53 | 25500 | .0033 |
| 85000 | .35 | .65 | 95.59  | -187.35 | 187.35 | 29750 | .0032 |
| 85000 | .40 | .60 | 106.88 | -209.49 | 209.49 | 34000 | .0031 |
| 85000 | .45 | .55 | 117.16 | -229.64 | 229.64 | 38250 | .0031 |
| 85000 | .50 | .50 | 126.24 | -247.44 | 247.44 | 42500 | .0030 |
| 85000 | .55 | .45 | 133.92 | -262.48 | 262.48 | 46750 | .0029 |
| 85000 | .60 | .40 | 139.94 | -274.29 | 274.29 | 51000 | .0027 |
| 85000 | .65 | .35 | 144.01 | -282.26 | 282.26 | 55250 | .0026 |
| 85000 | .70 | .30 | 145.74 | -285.66 | 285.66 | 59500 | .0024 |
| 85000 | .75 | .25 | 144.63 | -283.48 | 283.48 | 63750 | .0023 |
| 85000 | .80 | .20 | 139.94 | -274.29 | 274.29 | 68000 | .0021 |
| 85000 | .85 | .15 | 130.54 | -255.87 | 255.87 | 72250 | .0018 |
| 85000 | .90 | .10 | 114.37 | -224.17 | 224.17 | 76500 | .0015 |
| 85000 | .95 | .05 | 86.48  | -169.51 | 169.51 | 80750 | .0011 |
| 86000 | .05 | .95 | 14.64  | -28.70  | 28.70  | 4300  | .0034 |
| 86000 | .10 | .90 | 29.18  | -57.19  | 57.19  | 8600  | .0034 |
| 86000 | .15 | .85 | 43.49  | -85.24  | 85.24  | 12900 | .0034 |
| 86000 | .20 | .80 | 57.47  | -112.63 | 112.63 | 17200 | .0033 |
| 86000 | .25 | .75 | 70.99  | -139.13 | 139.13 | 21500 | .0033 |
| 86000 | .30 | .70 | 83.92  | -164.49 | 164.49 | 25800 | .0033 |
| 86000 | .35 | .65 | 96.15  | -188.45 | 188.45 | 30100 | .0032 |
| 86000 | .40 | .60 | 107.51 | -210.72 | 210.72 | 34400 | .0031 |
| 86000 | .45 | .55 | 117.85 | -230.98 | 230.98 | 38700 | .0030 |
| 86000 | .50 | .50 | 126.98 | -248.89 | 248.89 | 43000 | .0030 |
| 86000 | .55 | .45 | 134.71 | -264.02 | 264.02 | 47300 | .0028 |

|       |     |     |        |         |        |       |       |
|-------|-----|-----|--------|---------|--------|-------|-------|
| 86000 | .60 | .40 | 140.76 | -275.90 | 275.90 | 51600 | .0027 |
| 86000 | .65 | .35 | 144.86 | -283.92 | 283.92 | 55900 | .0026 |
| 86000 | .70 | .30 | 146.60 | -287.33 | 287.33 | 60200 | .0024 |
| 86000 | .75 | .25 | 145.48 | -285.14 | 285.14 | 64500 | .0023 |
| 86000 | .80 | .20 | 140.76 | -275.90 | 275.90 | 68800 | .0020 |
| 86000 | .85 | .15 | 131.31 | -257.37 | 257.37 | 73100 | .0018 |
| 86000 | .90 | .10 | 115.05 | -225.49 | 225.49 | 77400 | .0015 |
| 86000 | .95 | .05 | 86.99  | -170.50 | 170.50 | 81700 | .0011 |
| 87000 | .05 | .95 | 14.73  | -28.87  | 28.87  | 4350  | .0034 |
| 87000 | .10 | .90 | 29.35  | -57.52  | 57.52  | 8700  | .0034 |
| 87000 | .15 | .85 | 43.74  | -85.74  | 85.74  | 13050 | .0034 |
| 87000 | .20 | .80 | 57.80  | -113.29 | 113.29 | 17400 | .0033 |
| 87000 | .25 | .75 | 71.40  | -139.94 | 139.94 | 21750 | .0033 |
| 87000 | .30 | .70 | 84.41  | -165.45 | 165.45 | 26100 | .0032 |
| 87000 | .35 | .65 | 96.71  | -189.54 | 189.54 | 30450 | .0032 |
| 87000 | .40 | .60 | 108.13 | -211.94 | 211.94 | 34800 | .0031 |
| 87000 | .45 | .55 | 118.53 | -232.32 | 232.32 | 39150 | .0030 |
| 87000 | .50 | .50 | 127.72 | -250.33 | 250.33 | 43500 | .0029 |
| 87000 | .55 | .45 | 135.49 | -265.55 | 265.55 | 47850 | .0028 |
| 87000 | .60 | .40 | 141.58 | -277.50 | 277.50 | 52200 | .0027 |
| 87000 | .65 | .35 | 145.70 | -285.57 | 285.57 | 56550 | .0026 |
| 87000 | .70 | .30 | 147.45 | -289.00 | 289.00 | 60900 | .0024 |
| 87000 | .75 | .25 | 146.32 | -286.79 | 286.79 | 65250 | .0022 |
| 87000 | .80 | .20 | 141.58 | -277.50 | 277.50 | 69600 | .0020 |
| 87000 | .85 | .15 | 132.07 | -258.86 | 258.86 | 73950 | .0018 |
| 87000 | .90 | .10 | 115.71 | -226.80 | 226.80 | 78300 | .0015 |
| 87000 | .95 | .05 | 87.50  | -171.49 | 171.49 | 82650 | .0011 |
| 88000 | .05 | .95 | 14.81  | -29.04  | 29.04  | 4400  | .0034 |
| 88000 | .10 | .90 | 29.52  | -57.85  | 57.85  | 8800  | .0034 |
| 88000 | .15 | .85 | 43.99  | -86.23  | 86.23  | 13200 | .0033 |
| 88000 | .20 | .80 | 58.13  | -113.94 | 113.94 | 17600 | .0033 |
| 88000 | .25 | .75 | 71.81  | -140.74 | 140.74 | 22000 | .0033 |
| 88000 | .30 | .70 | 84.90  | -166.39 | 166.39 | 26400 | .0032 |
| 88000 | .35 | .65 | 97.26  | -190.63 | 190.63 | 30800 | .0032 |
| 88000 | .40 | .60 | 108.75 | -213.16 | 213.16 | 35200 | .0031 |
| 88000 | .45 | .55 | 119.21 | -233.66 | 233.66 | 39600 | .0030 |
| 88000 | .50 | .50 | 128.45 | -251.77 | 251.77 | 44000 | .0029 |
| 88000 | .55 | .45 | 136.26 | -267.07 | 267.07 | 48400 | .0028 |
| 88000 | .60 | .40 | 142.39 | -279.09 | 279.09 | 52800 | .0027 |
| 88000 | .65 | .35 | 146.53 | -287.20 | 287.20 | 57200 | .0026 |
| 88000 | .70 | .30 | 148.29 | -290.66 | 290.66 | 61600 | .0024 |
| 88000 | .75 | .25 | 147.16 | -288.43 | 288.43 | 66000 | .0022 |
| 88000 | .80 | .20 | 142.39 | -279.09 | 279.09 | 70400 | .0020 |
| 88000 | .85 | .15 | 132.83 | -260.34 | 260.34 | 74800 | .0018 |
| 88000 | .90 | .10 | 116.38 | -228.10 | 228.10 | 79200 | .0015 |
| 88000 | .95 | .05 | 88.00  | -172.47 | 172.47 | 83600 | .0011 |
| 89000 | .05 | .95 | 14.90  | -29.20  | 29.20  | 4450  | .0033 |
| 89000 | .10 | .90 | 29.68  | -58.18  | 58.18  | 8900  | .0033 |

|       |     |     |        |         |        |       |       |
|-------|-----|-----|--------|---------|--------|-------|-------|
| 89000 | .15 | .85 | 44.24  | -86.72  | 86.72  | 13350 | .0033 |
| 89000 | .20 | .80 | 58.46  | -114.58 | 114.58 | 17800 | .0033 |
| 89000 | .25 | .75 | 72.21  | -141.54 | 141.54 | 22250 | .0032 |
| 89000 | .30 | .70 | 85.38  | -167.34 | 167.34 | 26700 | .0032 |
| 89000 | .35 | .65 | 97.81  | -191.71 | 191.71 | 31150 | .0031 |
| 89000 | .40 | .60 | 109.37 | -214.36 | 214.36 | 35600 | .0031 |
| 89000 | .45 | .55 | 119.89 | -234.98 | 234.98 | 40050 | .0030 |
| 89000 | .50 | .50 | 129.18 | -253.19 | 253.19 | 44500 | .0029 |
| 89000 | .55 | .45 | 137.03 | -268.59 | 268.59 | 48950 | .0028 |
| 89000 | .60 | .40 | 143.20 | -280.67 | 280.67 | 53400 | .0027 |
| 89000 | .65 | .35 | 147.36 | -288.83 | 288.83 | 57850 | .0025 |
| 89000 | .70 | .30 | 149.13 | -292.30 | 292.30 | 62300 | .0024 |
| 89000 | .75 | .25 | 147.99 | -290.07 | 290.07 | 66750 | .0022 |
| 89000 | .80 | .20 | 143.20 | -280.67 | 280.67 | 71200 | .0020 |
| 89000 | .85 | .15 | 133.58 | -261.82 | 261.82 | 75650 | .0018 |
| 89000 | .90 | .10 | 117.03 | -229.39 | 229.39 | 80100 | .0015 |
| 89000 | .95 | .05 | 88.50  | -173.45 | 173.45 | 84550 | .0010 |
| 90000 | .05 | .95 | 14.98  | -29.36  | 29.36  | 4500  | .0033 |
| 90000 | .10 | .90 | 29.85  | -58.51  | 58.51  | 9000  | .0033 |
| 90000 | .15 | .85 | 44.49  | -87.20  | 87.20  | 13500 | .0033 |
| 90000 | .20 | .80 | 58.79  | -115.22 | 115.22 | 18000 | .0033 |
| 90000 | .25 | .75 | 72.62  | -142.33 | 142.33 | 22500 | .0032 |
| 90000 | .30 | .70 | 85.85  | -168.27 | 168.27 | 27000 | .0032 |
| 90000 | .35 | .65 | 98.36  | -192.78 | 192.78 | 31500 | .0031 |
| 90000 | .40 | .60 | 109.98 | -215.56 | 215.56 | 36000 | .0031 |
| 90000 | .45 | .55 | 120.56 | -236.30 | 236.30 | 40500 | .0030 |
| 90000 | .50 | .50 | 129.90 | -254.61 | 254.61 | 45000 | .0029 |
| 90000 | .55 | .45 | 137.80 | -270.09 | 270.09 | 49500 | .0028 |
| 90000 | .60 | .40 | 144.00 | -282.24 | 282.24 | 54000 | .0027 |
| 90000 | .65 | .35 | 148.19 | -290.45 | 290.45 | 58500 | .0025 |
| 90000 | .70 | .30 | 149.97 | -293.94 | 293.94 | 63000 | .0024 |
| 90000 | .75 | .25 | 148.82 | -291.69 | 291.69 | 67500 | .0022 |
| 90000 | .80 | .20 | 144.00 | -282.24 | 282.24 | 72000 | .0020 |
| 90000 | .85 | .15 | 134.33 | -263.29 | 263.29 | 76500 | .0018 |
| 90000 | .90 | .10 | 117.69 | -230.67 | 230.67 | 81000 | .0015 |
| 90000 | .95 | .05 | 88.99  | -174.42 | 174.42 | 85500 | .0010 |
| 91000 | .05 | .95 | 15.06  | -29.53  | 29.53  | 4550  | .0033 |
| 91000 | .10 | .90 | 30.01  | -58.83  | 58.83  | 9100  | .0033 |
| 91000 | .15 | .85 | 44.74  | -87.69  | 87.69  | 13650 | .0033 |
| 91000 | .20 | .80 | 59.11  | -115.86 | 115.86 | 18200 | .0032 |
| 91000 | .25 | .75 | 73.02  | -143.12 | 143.12 | 22750 | .0032 |
| 91000 | .30 | .70 | 86.33  | -169.21 | 169.21 | 27300 | .0032 |
| 91000 | .35 | .65 | 98.90  | -193.85 | 193.85 | 31850 | .0031 |
| 91000 | .40 | .60 | 110.59 | -216.76 | 216.76 | 36400 | .0030 |
| 91000 | .45 | .55 | 121.23 | -237.60 | 237.60 | 40950 | .0030 |
| 91000 | .50 | .50 | 130.62 | -256.02 | 256.02 | 45500 | .0029 |
| 91000 | .55 | .45 | 138.57 | -271.59 | 271.59 | 50050 | .0028 |
| 91000 | .60 | .40 | 144.80 | -283.80 | 283.80 | 54600 | .0027 |

|       |     |     |        |         |        |       |       |
|-------|-----|-----|--------|---------|--------|-------|-------|
| 91000 | .65 | .35 | 149.01 | -292.06 | 292.06 | 59150 | .0025 |
| 91000 | .70 | .30 | 150.80 | -295.57 | 295.57 | 63700 | .0024 |
| 91000 | .75 | .25 | 149.65 | -293.31 | 293.31 | 68250 | .0022 |
| 91000 | .80 | .20 | 144.80 | -283.80 | 283.80 | 72800 | .0020 |
| 91000 | .85 | .15 | 135.07 | -264.74 | 264.74 | 77350 | .0017 |
| 91000 | .90 | .10 | 118.34 | -231.95 | 231.95 | 81900 | .0014 |
| 91000 | .95 | .05 | 89.48  | -175.39 | 175.39 | 86450 | .0010 |
| 92000 | .05 | .95 | 15.15  | -29.69  | 29.69  | 4600  | .0033 |
| 92000 | .10 | .90 | 30.18  | -59.15  | 59.15  | 9200  | .0033 |
| 92000 | .15 | .85 | 44.98  | -88.17  | 88.17  | 13800 | .0033 |
| 92000 | .20 | .80 | 59.44  | -116.50 | 116.50 | 18400 | .0032 |
| 92000 | .25 | .75 | 73.42  | -143.90 | 143.90 | 23000 | .0032 |
| 92000 | .30 | .70 | 86.80  | -170.13 | 170.13 | 27600 | .0031 |
| 92000 | .35 | .65 | 99.45  | -194.91 | 194.91 | 32200 | .0031 |
| 92000 | .40 | .60 | 111.20 | -217.95 | 217.95 | 36800 | .0030 |
| 92000 | .45 | .55 | 121.89 | -238.91 | 238.91 | 41400 | .0029 |
| 92000 | .50 | .50 | 131.34 | -257.42 | 257.42 | 46000 | .0029 |
| 92000 | .55 | .45 | 139.32 | -273.08 | 273.08 | 50600 | .0028 |
| 92000 | .60 | .40 | 145.59 | -285.36 | 285.36 | 55200 | .0026 |
| 92000 | .65 | .35 | 149.82 | -293.66 | 293.66 | 59800 | .0025 |
| 92000 | .70 | .30 | 151.63 | -297.19 | 297.19 | 64400 | .0024 |
| 92000 | .75 | .25 | 150.47 | -294.92 | 294.92 | 69000 | .0022 |
| 92000 | .80 | .20 | 145.59 | -285.36 | 285.36 | 73600 | .0020 |
| 92000 | .85 | .15 | 135.81 | -266.20 | 266.20 | 78200 | .0017 |
| 92000 | .90 | .10 | 118.99 | -233.22 | 233.22 | 82800 | .0014 |
| 92000 | .95 | .05 | 89.97  | -176.35 | 176.35 | 87400 | .0010 |
| 93000 | .05 | .95 | 15.23  | -29.85  | 29.85  | 4650  | .0033 |
| 93000 | .10 | .90 | 30.34  | -59.47  | 59.47  | 9300  | .0033 |
| 93000 | .15 | .85 | 45.23  | -88.64  | 88.64  | 13950 | .0032 |
| 93000 | .20 | .80 | 59.76  | -117.13 | 117.13 | 18600 | .0032 |
| 93000 | .25 | .75 | 73.82  | -144.68 | 144.68 | 23250 | .0032 |
| 93000 | .30 | .70 | 87.27  | -171.06 | 171.06 | 27900 | .0031 |
| 93000 | .35 | .65 | 99.98  | -195.97 | 195.97 | 32550 | .0031 |
| 93000 | .40 | .60 | 111.80 | -219.13 | 219.13 | 37200 | .0030 |
| 93000 | .45 | .55 | 122.55 | -240.20 | 240.20 | 41850 | .0029 |
| 93000 | .50 | .50 | 132.05 | -258.82 | 258.82 | 46500 | .0028 |
| 93000 | .55 | .45 | 140.08 | -274.56 | 274.56 | 51150 | .0027 |
| 93000 | .60 | .40 | 146.38 | -286.91 | 286.91 | 55800 | .0026 |
| 93000 | .65 | .35 | 150.64 | -295.25 | 295.25 | 60450 | .0025 |
| 93000 | .70 | .30 | 152.45 | -298.80 | 298.80 | 65100 | .0023 |
| 93000 | .75 | .25 | 151.28 | -296.52 | 296.52 | 69750 | .0022 |
| 93000 | .80 | .20 | 146.38 | -286.91 | 286.91 | 74400 | .0020 |
| 93000 | .85 | .15 | 136.55 | -267.64 | 267.64 | 79050 | .0017 |
| 93000 | .90 | .10 | 119.64 | -234.49 | 234.49 | 83700 | .0014 |
| 93000 | .95 | .05 | 90.46  | -177.31 | 177.31 | 88350 | .0010 |
| 94000 | .05 | .95 | 15.31  | -30.01  | 30.01  | 4700  | .0033 |
| 94000 | .10 | .90 | 30.51  | -59.79  | 59.79  | 9400  | .0032 |
| 94000 | .15 | .85 | 45.47  | -89.12  | 89.12  | 14100 | .0032 |

|       |     |     |        |         |        |       |       |
|-------|-----|-----|--------|---------|--------|-------|-------|
| 94000 | .20 | .80 | 60.08  | -117.76 | 117.76 | 18800 | .0032 |
| 94000 | .25 | .75 | 74.21  | -145.46 | 145.46 | 23500 | .0032 |
| 94000 | .30 | .70 | 87.74  | -171.97 | 171.97 | 28200 | .0031 |
| 94000 | .35 | .65 | 100.52 | -197.02 | 197.02 | 32900 | .0031 |
| 94000 | .40 | .60 | 112.40 | -220.30 | 220.30 | 37600 | .0030 |
| 94000 | .45 | .55 | 123.21 | -241.49 | 241.49 | 42300 | .0029 |
| 94000 | .50 | .50 | 132.76 | -260.21 | 260.21 | 47000 | .0028 |
| 94000 | .55 | .45 | 140.83 | -276.03 | 276.03 | 51700 | .0027 |
| 94000 | .60 | .40 | 147.17 | -288.44 | 288.44 | 56400 | .0026 |
| 94000 | .65 | .35 | 151.44 | -296.83 | 296.83 | 61100 | .0025 |
| 94000 | .70 | .30 | 153.27 | -300.40 | 300.40 | 65800 | .0023 |
| 94000 | .75 | .25 | 152.09 | -298.11 | 298.11 | 70500 | .0022 |
| 94000 | .80 | .20 | 147.17 | -288.44 | 288.44 | 75200 | .0020 |
| 94000 | .85 | .15 | 137.28 | -269.07 | 269.07 | 79900 | .0017 |
| 94000 | .90 | .10 | 120.28 | -235.74 | 235.74 | 84600 | .0014 |
| 94000 | .95 | .05 | 90.95  | -178.26 | 178.26 | 89300 | .0010 |
| 95000 | .05 | .95 | 15.39  | -30.17  | 30.17  | 4750  | .0032 |
| 95000 | .10 | .90 | 30.67  | -60.11  | 60.11  | 9500  | .0032 |
| 95000 | .15 | .85 | 45.71  | -89.59  | 89.59  | 14250 | .0032 |
| 95000 | .20 | .80 | 60.40  | -118.38 | 118.38 | 19000 | .0032 |
| 95000 | .25 | .75 | 74.61  | -146.23 | 146.23 | 23750 | .0031 |
| 95000 | .30 | .70 | 88.21  | -172.89 | 172.89 | 28500 | .0031 |
| 95000 | .35 | .65 | 101.05 | -198.07 | 198.07 | 33250 | .0030 |
| 95000 | .40 | .60 | 113.00 | -221.47 | 221.47 | 38000 | .0030 |
| 95000 | .45 | .55 | 123.86 | -242.77 | 242.77 | 42750 | .0029 |
| 95000 | .50 | .50 | 133.46 | -261.59 | 261.59 | 47500 | .0028 |
| 95000 | .55 | .45 | 141.58 | -277.49 | 277.49 | 52250 | .0027 |
| 95000 | .60 | .40 | 147.95 | -289.97 | 289.97 | 57000 | .0026 |
| 95000 | .65 | .35 | 152.25 | -298.41 | 298.41 | 61750 | .0025 |
| 95000 | .70 | .30 | 154.08 | -302.00 | 302.00 | 66500 | .0023 |
| 95000 | .75 | .25 | 152.90 | -299.69 | 299.69 | 71250 | .0021 |
| 95000 | .80 | .20 | 147.95 | -289.97 | 289.97 | 76000 | .0019 |
| 95000 | .85 | .15 | 138.01 | -270.50 | 270.50 | 80750 | .0017 |
| 95000 | .90 | .10 | 120.92 | -236.99 | 236.99 | 85500 | .0014 |
| 95000 | .95 | .05 | 91.43  | -179.20 | 179.20 | 90250 | .0010 |
| 96000 | .05 | .95 | 15.47  | -30.33  | 30.33  | 4800  | .0032 |
| 96000 | .10 | .90 | 30.83  | -60.42  | 60.42  | 9600  | .0032 |
| 96000 | .15 | .85 | 45.95  | -90.06  | 90.06  | 14400 | .0032 |
| 96000 | .20 | .80 | 60.72  | -119.00 | 119.00 | 19200 | .0032 |
| 96000 | .25 | .75 | 75.00  | -147.00 | 147.00 | 24000 | .0031 |
| 96000 | .30 | .70 | 88.67  | -173.79 | 173.79 | 28800 | .0031 |
| 96000 | .35 | .65 | 101.58 | -199.11 | 199.11 | 33600 | .0030 |
| 96000 | .40 | .60 | 113.59 | -222.63 | 222.63 | 38400 | .0030 |
| 96000 | .45 | .55 | 124.51 | -244.04 | 244.04 | 43200 | .0029 |
| 96000 | .50 | .50 | 134.16 | -262.96 | 262.96 | 48000 | .0028 |
| 96000 | .55 | .45 | 142.32 | -278.95 | 278.95 | 52800 | .0027 |
| 96000 | .60 | .40 | 148.72 | -291.50 | 291.50 | 57600 | .0026 |
| 96000 | .65 | .35 | 153.05 | -299.97 | 299.97 | 62400 | .0025 |

|       |     |     |        |         |        |       |       |
|-------|-----|-----|--------|---------|--------|-------|-------|
| 96000 | .70 | .30 | 154.89 | -303.58 | 303.58 | 67200 | .0023 |
| 96000 | .75 | .25 | 153.70 | -301.26 | 301.26 | 72000 | .0021 |
| 96000 | .80 | .20 | 148.72 | -291.50 | 291.50 | 76800 | .0019 |
| 96000 | .85 | .15 | 138.73 | -271.92 | 271.92 | 81600 | .0017 |
| 96000 | .90 | .10 | 121.55 | -238.24 | 238.24 | 86400 | .0014 |
| 96000 | .95 | .05 | 91.91  | -180.14 | 180.14 | 91200 | .0010 |
| 97000 | .05 | .95 | 15.55  | -30.48  | 30.48  | 4850  | .0032 |
| 97000 | .10 | .90 | 30.99  | -60.74  | 60.74  | 9700  | .0032 |
| 97000 | .15 | .85 | 46.19  | -90.53  | 90.53  | 14550 | .0032 |
| 97000 | .20 | .80 | 61.03  | -119.62 | 119.62 | 19400 | .0031 |
| 97000 | .25 | .75 | 75.39  | -147.76 | 147.76 | 24250 | .0031 |
| 97000 | .30 | .70 | 89.13  | -174.70 | 174.70 | 29100 | .0031 |
| 97000 | .35 | .65 | 102.11 | -200.14 | 200.14 | 33950 | .0030 |
| 97000 | .40 | .60 | 114.18 | -223.79 | 223.79 | 38800 | .0029 |
| 97000 | .45 | .55 | 125.16 | -245.31 | 245.31 | 43650 | .0029 |
| 97000 | .50 | .50 | 134.86 | -264.33 | 264.33 | 48500 | .0028 |
| 97000 | .55 | .45 | 143.06 | -280.40 | 280.40 | 53350 | .0027 |
| 97000 | .60 | .40 | 149.50 | -293.01 | 293.01 | 58200 | .0026 |
| 97000 | .65 | .35 | 153.84 | -301.53 | 301.53 | 63050 | .0024 |
| 97000 | .70 | .30 | 155.69 | -305.16 | 305.16 | 67900 | .0023 |
| 97000 | .75 | .25 | 154.50 | -302.83 | 302.83 | 72750 | .0021 |
| 97000 | .80 | .20 | 149.50 | -293.01 | 293.01 | 77600 | .0019 |
| 97000 | .85 | .15 | 139.46 | -273.33 | 273.33 | 82450 | .0017 |
| 97000 | .90 | .10 | 122.18 | -239.48 | 239.48 | 87300 | .0014 |
| 97000 | .95 | .05 | 92.39  | -181.08 | 181.08 | 92150 | .0010 |
| 98000 | .05 | .95 | 15.63  | -30.64  | 30.64  | 4900  | .0032 |
| 98000 | .10 | .90 | 31.15  | -61.05  | 61.05  | 9800  | .0032 |
| 98000 | .15 | .85 | 46.43  | -91.00  | 91.00  | 14700 | .0032 |
| 98000 | .20 | .80 | 61.34  | -120.24 | 120.24 | 19600 | .0031 |
| 98000 | .25 | .75 | 75.78  | -148.52 | 148.52 | 24500 | .0031 |
| 98000 | .30 | .70 | 89.59  | -175.59 | 175.59 | 29400 | .0030 |
| 98000 | .35 | .65 | 102.64 | -201.17 | 201.17 | 34300 | .0030 |
| 98000 | .40 | .60 | 114.77 | -224.94 | 224.94 | 39200 | .0029 |
| 98000 | .45 | .55 | 125.80 | -246.57 | 246.57 | 44100 | .0029 |
| 98000 | .50 | .50 | 135.55 | -265.69 | 265.69 | 49000 | .0028 |
| 98000 | .55 | .45 | 143.80 | -281.84 | 281.84 | 53900 | .0027 |
| 98000 | .60 | .40 | 150.26 | -294.52 | 294.52 | 58800 | .0026 |
| 98000 | .65 | .35 | 154.63 | -303.08 | 303.08 | 63700 | .0024 |
| 98000 | .70 | .30 | 156.49 | -306.73 | 306.73 | 68600 | .0023 |
| 98000 | .75 | .25 | 155.30 | -304.38 | 304.38 | 73500 | .0021 |
| 98000 | .80 | .20 | 150.26 | -294.52 | 294.52 | 78400 | .0019 |
| 98000 | .85 | .15 | 140.17 | -274.74 | 274.74 | 83300 | .0017 |
| 98000 | .90 | .10 | 122.81 | -240.71 | 240.71 | 88200 | .0014 |
| 98000 | .95 | .05 | 92.86  | -182.01 | 182.01 | 93100 | .0010 |
| 99000 | .05 | .95 | 15.71  | -30.80  | 30.80  | 4950  | .0032 |
| 99000 | .10 | .90 | 31.31  | -61.36  | 61.36  | 9900  | .0032 |
| 99000 | .15 | .85 | 46.66  | -91.46  | 91.46  | 14850 | .0031 |
| 99000 | .20 | .80 | 61.66  | -120.85 | 120.85 | 19800 | .0031 |

|        |     |     |        |         |        |       |       |
|--------|-----|-----|--------|---------|--------|-------|-------|
| 99000  | .25 | .75 | 76.16  | -149.28 | 149.28 | 24750 | .0031 |
| 99000  | .30 | .70 | 90.04  | -176.49 | 176.49 | 29700 | .0030 |
| 99000  | .35 | .65 | 103.16 | -202.19 | 202.19 | 34650 | .0030 |
| 99000  | .40 | .60 | 115.35 | -226.09 | 226.09 | 39600 | .0029 |
| 99000  | .45 | .55 | 126.44 | -247.83 | 247.83 | 44550 | .0028 |
| 99000  | .50 | .50 | 136.24 | -267.04 | 267.04 | 49500 | .0028 |
| 99000  | .55 | .45 | 144.53 | -283.28 | 283.28 | 54450 | .0027 |
| 99000  | .60 | .40 | 151.03 | -296.02 | 296.02 | 59400 | .0025 |
| 99000  | .65 | .35 | 155.42 | -304.62 | 304.62 | 64350 | .0024 |
| 99000  | .70 | .30 | 157.29 | -308.29 | 308.29 | 69300 | .0023 |
| 99000  | .75 | .25 | 156.09 | -305.93 | 305.93 | 74250 | .0021 |
| 99000  | .80 | .20 | 151.03 | -296.02 | 296.02 | 79200 | .0019 |
| 99000  | .85 | .15 | 140.89 | -276.14 | 276.14 | 84150 | .0017 |
| 99000  | .90 | .10 | 123.43 | -241.93 | 241.93 | 89100 | .0014 |
| 99000  | .95 | .05 | 93.33  | -182.94 | 182.94 | 94050 | .0010 |
| 100000 | .05 | .95 | 15.79  | -30.95  | 30.95  | 5000  | .0032 |
| 100000 | .10 | .90 | 31.46  | -61.67  | 61.67  | 10000 | .0031 |
| 100000 | .15 | .85 | 46.90  | -91.92  | 91.92  | 15000 | .0031 |
| 100000 | .20 | .80 | 61.97  | -121.46 | 121.46 | 20000 | .0031 |
| 100000 | .25 | .75 | 76.55  | -150.03 | 150.03 | 25000 | .0031 |
| 100000 | .30 | .70 | 90.50  | -177.38 | 177.38 | 30000 | .0030 |
| 100000 | .35 | .65 | 103.68 | -203.21 | 203.21 | 35000 | .0030 |
| 100000 | .40 | .60 | 115.93 | -227.22 | 227.22 | 40000 | .0029 |
| 100000 | .45 | .55 | 127.08 | -249.08 | 249.08 | 45000 | .0028 |
| 100000 | .50 | .50 | 136.93 | -268.38 | 268.38 | 50000 | .0027 |
| 100000 | .55 | .45 | 145.26 | -284.70 | 284.70 | 55000 | .0026 |
| 100000 | .60 | .40 | 151.79 | -297.51 | 297.51 | 60000 | .0025 |
| 100000 | .65 | .35 | 156.20 | -306.16 | 306.16 | 65000 | .0024 |
| 100000 | .70 | .30 | 158.08 | -309.84 | 309.84 | 70000 | .0023 |
| 100000 | .75 | .25 | 156.87 | -307.47 | 307.47 | 75000 | .0021 |
| 100000 | .80 | .20 | 151.79 | -297.51 | 297.51 | 80000 | .0019 |
| 100000 | .85 | .15 | 141.60 | -277.53 | 277.53 | 85000 | .0017 |
| 100000 | .90 | .10 | 124.06 | -243.15 | 243.15 | 90000 | .0014 |
| 100000 | .95 | .05 | 93.80  | -183.86 | 183.86 | 95000 | .0010 |
