# Supplementary material for: Hardy-Weinberg Equilibrium Testing of Biological Ascertainment for Mendelian Randomization Studies
Source: PubMed Central journal article supplement — Am J Epidemiol. 2009 Jan 6;169(4):505–14. doi: 10.1093/aje/kwn359 (PMC2640163; doi:10.1093/aje/kwn359), 2009-01-06
Supplement: kwn359_5.pdf [file kwn359_5.pdf]

Web Table 3. Summary of deviations from Hardy Weinberg Equilibrium for sample sizes of 1000 to 100000, and for allele frequencies from 0.05 to 0.95 (with increments of 0.05) after subtracting from the homozygote 1 group a number of 1.96 standard deviations.  $p_{true}$  and  $q_{true}$  are the allele frequencies used to start the simulations. They were also used to estimate the true frequencies of homozygotes (Hz1 True and Hz2 True) and heterozygotes (Het True) assuming HWE.  $p_{false}$  and  $q_{false}$  are the allele frequencies observed after subtracting from the homozygote 1 group a number of 1.96 standard deviations. Hz1 Exp, Het Exp and Hz2 Exp are the expected values of the three genotype groups computed from  $p_{false}$  and  $q_{false}$ . Hz1 Obs, Het Obs and Hz2 Obs are the observed values for each genotype group after subtracting from the homozygote 1 group a number of 1.96 standard deviations (which equates to the number presented in No call).  $\chi^2$  is the HWE  $\chi^2$  value.

| N    | $p_{true}$ | $q_{true}$ | Hz1 True | Het True | Hz2 True | $p_{false}$ | $q_{false}$ | Hz1 Exp | Het Exp | Hz2 Exp | Hz1 Obs | Het Obs | Hz2 Obs | No call | $\chi^2$ |
|------|------------|------------|----------|----------|----------|-------------|-------------|---------|---------|---------|---------|---------|---------|---------|----------|
| 1000 | .05        | .95        | 3        | 95       | 903      | .0471       | .9529       | 2       | 89      | 905     | -1      | 95      | 903     | 3       | 3.92     |
| 1000 | .10        | .90        | 10       | 180      | 810      | .0944       | .9056       | 9       | 170     | 815     | 4       | 180     | 810     | 6       | 3.48     |
| 1000 | .15        | .85        | 23       | 255      | 723      | .1421       | .8579       | 20      | 242     | 729     | 13      | 255     | 723     | 9       | 3.05     |
| 1000 | .20        | .80        | 40       | 320      | 640      | .1902       | .8098       | 36      | 304     | 648     | 28      | 320     | 640     | 12      | 2.64     |
| 1000 | .25        | .75        | 63       | 375      | 563      | .2386       | .7614       | 56      | 358     | 571     | 47      | 375     | 563     | 15      | 2.26     |
| 1000 | .30        | .70        | 90       | 420      | 490      | .2874       | .7126       | 81      | 402     | 499     | 72      | 420     | 490     | 18      | 1.90     |
| 1000 | .35        | .65        | 123      | 455      | 423      | .3365       | .6635       | 111     | 437     | 431     | 102     | 455     | 423     | 20      | 1.57     |
| 1000 | .40        | .60        | 160      | 480      | 360      | .3860       | .6140       | 146     | 463     | 368     | 137     | 480     | 360     | 23      | 1.28     |
| 1000 | .45        | .55        | 203      | 495      | 303      | .4360       | .5640       | 185     | 480     | 310     | 178     | 495     | 303     | 25      | 1.01     |
| 1000 | .50        | .50        | 250      | 500      | 250      | .4862       | .5138       | 230     | 486     | 257     | 223     | 500     | 250     | 27      | .78      |
| 1000 | .55        | .45        | 303      | 495      | 203      | .5368       | .4632       | 280     | 483     | 208     | 274     | 495     | 203     | 28      | .59      |
| 1000 | .60        | .40        | 360      | 480      | 160      | .5877       | .4123       | 335     | 470     | 165     | 330     | 480     | 160     | 30      | .42      |
| 1000 | .65        | .35        | 423      | 455      | 123      | .6389       | .3611       | 396     | 447     | 126     | 392     | 455     | 123     | 31      | .29      |
| 1000 | .70        | .30        | 490      | 420      | 90       | .6904       | .3096       | 462     | 414     | 93      | 459     | 420     | 90      | 31      | .19      |
| 1000 | .75        | .25        | 563      | 375      | 63       | .7421       | .2579       | 534     | 371     | 64      | 532     | 375     | 63      | 31      | .11      |
| 1000 | .80        | .20        | 640      | 320      | 40       | .7939       | .2061       | 611     | 318     | 41      | 610     | 320     | 40      | 30      | .06      |
| 1000 | .85        | .15        | 723      | 255      | 23       | .8457       | .1543       | 695     | 254     | 23      | 695     | 255     | 23      | 28      | .02      |
| 1000 | .90        | .10        | 810      | 180      | 10       | .8975       | .1025       | 786     | 180     | 10      | 786     | 180     | 10      | 24      | .01      |
| 1000 | .95        | .05        | 903      | 95       | 3        | .9491       | .0509       | 884     | 95      | 3       | 884     | 95      | 3       | 18      | .00      |
| 2000 | .05        | .95        | 5        | 190      | 1805     | .0479       | .9521       | 5       | 182     | 1809    | 1       | 190     | 1805    | 4       | 3.77     |
| 2000 | .10        | .90        | 20       | 360      | 1620     | .0961       | .9039       | 18      | 346     | 1627    | 11      | 360     | 1620    | 9       | 3.35     |
| 2000 | .15        | .85        | 45       | 510      | 1445     | .1444       | .8556       | 41      | 491     | 1454    | 32      | 510     | 1445    | 13      | 2.95     |
| 2000 | .20        | .80        | 80       | 640      | 1280     | .1931       | .8069       | 74      | 618     | 1291    | 63      | 640     | 1280    | 17      | 2.55     |
| 2000 | .25        | .75        | 125      | 750      | 1125     | .2420       | .7580       | 116     | 726     | 1137    | 104     | 750     | 1125    | 21      | 2.19     |

|      |     |     |      |      |      |       |       |      |      |      |      |      |      |    |      |
|------|-----|-----|------|------|------|-------|-------|------|------|------|------|------|------|----|------|
| 2000 | .30 | .70 | 180  | 840  | 980  | .2911 | .7089 | 167  | 815  | 992  | 155  | 840  | 980  | 25 | 1.84 |
| 2000 | .35 | .65 | 245  | 910  | 845  | .3405 | .6595 | 229  | 885  | 857  | 216  | 910  | 845  | 29 | 1.53 |
| 2000 | .40 | .60 | 320  | 960  | 720  | .3902 | .6098 | 300  | 936  | 732  | 288  | 960  | 720  | 32 | 1.24 |
| 2000 | .45 | .55 | 405  | 990  | 605  | .4401 | .5599 | 381  | 968  | 616  | 370  | 990  | 605  | 35 | .99  |
| 2000 | .50 | .50 | 500  | 1000 | 500  | .4903 | .5097 | 472  | 981  | 510  | 462  | 1000 | 500  | 38 | .76  |
| 2000 | .55 | .45 | 605  | 990  | 405  | .5408 | .4592 | 573  | 973  | 413  | 565  | 990  | 405  | 40 | .57  |
| 2000 | .60 | .40 | 720  | 960  | 320  | .5914 | .4086 | 685  | 946  | 327  | 678  | 960  | 320  | 42 | .41  |
| 2000 | .65 | .35 | 845  | 910  | 245  | .6423 | .3577 | 807  | 899  | 250  | 802  | 910  | 245  | 43 | .28  |
| 2000 | .70 | .30 | 980  | 840  | 180  | .6933 | .3067 | 940  | 832  | 184  | 936  | 840  | 180  | 44 | .18  |
| 2000 | .75 | .25 | 1125 | 750  | 125  | .7444 | .2556 | 1084 | 744  | 128  | 1082 | 750  | 125  | 43 | .11  |
| 2000 | .80 | .20 | 1280 | 640  | 80   | .7957 | .2043 | 1240 | 637  | 82   | 1238 | 640  | 80   | 42 | .06  |
| 2000 | .85 | .15 | 1445 | 510  | 45   | .8470 | .1530 | 1407 | 508  | 46   | 1406 | 510  | 45   | 39 | .02  |
| 2000 | .90 | .10 | 1620 | 360  | 20   | .8983 | .1017 | 1586 | 359  | 20   | 1586 | 360  | 20   | 34 | .01  |
| 2000 | .95 | .05 | 1805 | 190  | 5    | .9493 | .0507 | 1779 | 190  | 5    | 1779 | 190  | 5    | 26 | .00  |
| 3000 | .05 | .95 | 8    | 285  | 2708 | .0483 | .9517 | 7    | 275  | 2712 | 2    | 285  | 2708 | 5  | 3.71 |
| 3000 | .10 | .90 | 30   | 540  | 2430 | .0968 | .9032 | 28   | 523  | 2439 | 19   | 540  | 2430 | 11 | 3.30 |
| 3000 | .15 | .85 | 68   | 765  | 2168 | .1455 | .8545 | 63   | 742  | 2179 | 52   | 765  | 2168 | 16 | 2.90 |
| 3000 | .20 | .80 | 120  | 960  | 1920 | .1944 | .8056 | 113  | 933  | 1934 | 99   | 960  | 1920 | 21 | 2.52 |
| 3000 | .25 | .75 | 188  | 1125 | 1688 | .2434 | .7566 | 176  | 1096 | 1702 | 162  | 1125 | 1688 | 26 | 2.16 |
| 3000 | .30 | .70 | 270  | 1260 | 1470 | .2928 | .7072 | 254  | 1230 | 1485 | 239  | 1260 | 1470 | 31 | 1.82 |
| 3000 | .35 | .65 | 368  | 1365 | 1268 | .3423 | .6577 | 347  | 1335 | 1283 | 332  | 1365 | 1268 | 35 | 1.51 |
| 3000 | .40 | .60 | 480  | 1440 | 1080 | .3920 | .6080 | 455  | 1411 | 1094 | 441  | 1440 | 1080 | 39 | 1.23 |
| 3000 | .45 | .55 | 608  | 1485 | 908  | .4420 | .5580 | 578  | 1459 | 921  | 564  | 1485 | 908  | 43 | .97  |
| 3000 | .50 | .50 | 750  | 1500 | 750  | .4921 | .5079 | 715  | 1476 | 762  | 704  | 1500 | 750  | 46 | .76  |
| 3000 | .55 | .45 | 908  | 1485 | 608  | .5425 | .4575 | 868  | 1465 | 618  | 858  | 1485 | 608  | 49 | .57  |
| 3000 | .60 | .40 | 1080 | 1440 | 480  | .5930 | .4070 | 1037 | 1423 | 488  | 1028 | 1440 | 480  | 52 | .41  |
| 3000 | .65 | .35 | 1268 | 1365 | 368  | .6437 | .3563 | 1221 | 1352 | 374  | 1214 | 1365 | 368  | 53 | .28  |
| 3000 | .70 | .30 | 1470 | 1260 | 270  | .6945 | .3055 | 1421 | 1250 | 275  | 1416 | 1260 | 270  | 54 | .18  |
| 3000 | .75 | .25 | 1688 | 1125 | 188  | .7455 | .2545 | 1638 | 1118 | 191  | 1634 | 1125 | 188  | 53 | .11  |
| 3000 | .80 | .20 | 1920 | 960  | 120  | .7965 | .2035 | 1871 | 956  | 122  | 1868 | 960  | 120  | 52 | .06  |
| 3000 | .85 | .15 | 2168 | 765  | 68   | .8476 | .1524 | 2121 | 763  | 69   | 2119 | 765  | 68   | 48 | .02  |
| 3000 | .90 | .10 | 2430 | 540  | 30   | .8986 | .1014 | 2388 | 539  | 30   | 2388 | 540  | 30   | 42 | .01  |
| 3000 | .95 | .05 | 2708 | 285  | 8    | .9495 | .0505 | 2676 | 285  | 8    | 2676 | 285  | 8    | 32 | .00  |

|      |     |     |      |      |      |       |       |      |      |      |      |      |      |    |      |
|------|-----|-----|------|------|------|-------|-------|------|------|------|------|------|------|----|------|
| 4000 | .05 | .95 | 10   | 380  | 3610 | .0485 | .9515 | 9    | 369  | 3616 | 4    | 380  | 3610 | 6  | 3.68 |
| 4000 | .10 | .90 | 40   | 720  | 3240 | .0972 | .9028 | 38   | 700  | 3250 | 28   | 720  | 3240 | 12 | 3.27 |
| 4000 | .15 | .85 | 90   | 1020 | 2890 | .1461 | .8539 | 85   | 993  | 2903 | 72   | 1020 | 2890 | 18 | 2.87 |
| 4000 | .20 | .80 | 160  | 1280 | 2560 | .1951 | .8049 | 151  | 1249 | 2576 | 136  | 1280 | 2560 | 24 | 2.50 |
| 4000 | .25 | .75 | 250  | 1500 | 2250 | .2443 | .7557 | 237  | 1466 | 2267 | 220  | 1500 | 2250 | 30 | 2.14 |
| 4000 | .30 | .70 | 360  | 1680 | 1960 | .2937 | .7063 | 342  | 1645 | 1978 | 325  | 1680 | 1960 | 35 | 1.80 |
| 4000 | .35 | .65 | 490  | 1820 | 1690 | .3433 | .6567 | 467  | 1785 | 1707 | 449  | 1820 | 1690 | 41 | 1.50 |
| 4000 | .40 | .60 | 640  | 1920 | 1440 | .3931 | .6069 | 611  | 1887 | 1457 | 595  | 1920 | 1440 | 45 | 1.22 |
| 4000 | .45 | .55 | 810  | 1980 | 1210 | .4431 | .5569 | 775  | 1949 | 1225 | 760  | 1980 | 1210 | 50 | .97  |
| 4000 | .50 | .50 | 1000 | 2000 | 1000 | .4932 | .5068 | 960  | 1973 | 1014 | 946  | 2000 | 1000 | 54 | .75  |
| 4000 | .55 | .45 | 1210 | 1980 | 810  | .5435 | .4565 | 1165 | 1957 | 822  | 1153 | 1980 | 810  | 57 | .56  |
| 4000 | .60 | .40 | 1440 | 1920 | 640  | .5940 | .4060 | 1390 | 1901 | 650  | 1380 | 1920 | 640  | 60 | .41  |
| 4000 | .65 | .35 | 1690 | 1820 | 490  | .6446 | .3554 | 1636 | 1805 | 498  | 1629 | 1820 | 490  | 61 | .28  |
| 4000 | .70 | .30 | 1960 | 1680 | 360  | .6953 | .3047 | 1904 | 1669 | 366  | 1898 | 1680 | 360  | 62 | .18  |
| 4000 | .75 | .25 | 2250 | 1500 | 250  | .7461 | .2539 | 2192 | 1492 | 254  | 2189 | 1500 | 250  | 61 | .11  |
| 4000 | .80 | .20 | 2560 | 1280 | 160  | .7970 | .2030 | 2503 | 1275 | 162  | 2500 | 1280 | 160  | 60 | .06  |
| 4000 | .85 | .15 | 2890 | 1020 | 90   | .8479 | .1521 | 2836 | 1017 | 91   | 2834 | 1020 | 90   | 56 | .02  |
| 4000 | .90 | .10 | 3240 | 720  | 40   | .8988 | .1012 | 3192 | 719  | 40   | 3191 | 720  | 40   | 49 | .01  |
| 4000 | .95 | .05 | 3610 | 380  | 10   | .9495 | .0505 | 3573 | 380  | 10   | 3573 | 380  | 10   | 37 | .00  |
| 5000 | .05 | .95 | 13   | 475  | 4513 | .0487 | .9513 | 12   | 462  | 4519 | 6    | 475  | 4513 | 7  | 3.65 |
| 5000 | .10 | .90 | 50   | 900  | 4050 | .0975 | .9025 | 47   | 878  | 4061 | 36   | 900  | 4050 | 14 | 3.25 |
| 5000 | .15 | .85 | 113  | 1275 | 3613 | .1465 | .8535 | 107  | 1245 | 3627 | 92   | 1275 | 3613 | 21 | 2.86 |
| 5000 | .20 | .80 | 200  | 1600 | 3200 | .1956 | .8044 | 190  | 1565 | 3217 | 173  | 1600 | 3200 | 27 | 2.48 |
| 5000 | .25 | .75 | 313  | 1875 | 2813 | .2449 | .7551 | 298  | 1837 | 2831 | 279  | 1875 | 2813 | 34 | 2.12 |
| 5000 | .30 | .70 | 450  | 2100 | 2450 | .2944 | .7056 | 430  | 2061 | 2470 | 410  | 2100 | 2450 | 40 | 1.79 |
| 5000 | .35 | .65 | 613  | 2275 | 2113 | .3440 | .6560 | 586  | 2236 | 2132 | 567  | 2275 | 2113 | 45 | 1.49 |
| 5000 | .40 | .60 | 800  | 2400 | 1800 | .3938 | .6062 | 768  | 2363 | 1818 | 749  | 2400 | 1800 | 51 | 1.21 |
| 5000 | .45 | .55 | 1013 | 2475 | 1513 | .4438 | .5562 | 974  | 2441 | 1530 | 957  | 2475 | 1513 | 56 | .96  |
| 5000 | .50 | .50 | 1250 | 2500 | 1250 | .4939 | .5061 | 1205 | 2470 | 1265 | 1190 | 2500 | 1250 | 60 | .75  |
| 5000 | .55 | .45 | 1513 | 2475 | 1013 | .5442 | .4558 | 1462 | 2449 | 1026 | 1449 | 2475 | 1013 | 64 | .56  |
| 5000 | .60 | .40 | 1800 | 2400 | 800  | .5946 | .4054 | 1744 | 2378 | 811  | 1733 | 2400 | 800  | 67 | .41  |
| 5000 | .65 | .35 | 2113 | 2275 | 613  | .6451 | .3549 | 2053 | 2258 | 621  | 2044 | 2275 | 613  | 68 | .28  |
| 5000 | .70 | .30 | 2450 | 2100 | 450  | .6958 | .3042 | 2387 | 2087 | 456  | 2381 | 2100 | 450  | 69 | .18  |

|      |     |     |      |      |      |       |       |      |      |      |      |      |      |    |      |
|------|-----|-----|------|------|------|-------|-------|------|------|------|------|------|------|----|------|
| 5000 | .75 | .25 | 2813 | 1875 | 313  | .7465 | .2535 | 2748 | 1866 | 317  | 2744 | 1875 | 313  | 69 | .11  |
| 5000 | .80 | .20 | 3200 | 1600 | 200  | .7973 | .2027 | 3136 | 1595 | 203  | 3133 | 1600 | 200  | 67 | .06  |
| 5000 | .85 | .15 | 3613 | 1275 | 113  | .8481 | .1519 | 3552 | 1272 | 114  | 3550 | 1275 | 113  | 62 | .02  |
| 5000 | .90 | .10 | 4050 | 900  | 50   | .8989 | .1011 | 3996 | 899  | 51   | 3996 | 900  | 50   | 54 | .01  |
| 5000 | .95 | .05 | 4513 | 475  | 13   | .9496 | .0504 | 4471 | 475  | 13   | 4471 | 475  | 13   | 41 | .00  |
| 6000 | .05 | .95 | 15   | 570  | 5415 | .0488 | .9512 | 14   | 556  | 5422 | 7    | 570  | 5415 | 8  | 3.64 |
| 6000 | .10 | .90 | 60   | 1080 | 4860 | .0977 | .9023 | 57   | 1055 | 4872 | 45   | 1080 | 4860 | 15 | 3.23 |
| 6000 | .15 | .85 | 135  | 1530 | 4335 | .1468 | .8532 | 129  | 1497 | 4351 | 112  | 1530 | 4335 | 23 | 2.84 |
| 6000 | .20 | .80 | 240  | 1920 | 3840 | .1960 | .8040 | 229  | 1882 | 3859 | 210  | 1920 | 3840 | 30 | 2.47 |
| 6000 | .25 | .75 | 375  | 2250 | 3375 | .2454 | .7546 | 359  | 2208 | 3396 | 338  | 2250 | 3375 | 37 | 2.12 |
| 6000 | .30 | .70 | 540  | 2520 | 2940 | .2949 | .7051 | 518  | 2477 | 2961 | 497  | 2520 | 2940 | 43 | 1.79 |
| 6000 | .35 | .65 | 735  | 2730 | 2535 | .3446 | .6554 | 706  | 2688 | 2556 | 685  | 2730 | 2535 | 50 | 1.48 |
| 6000 | .40 | .60 | 960  | 2880 | 2160 | .3944 | .6056 | 925  | 2840 | 2180 | 904  | 2880 | 2160 | 56 | 1.21 |
| 6000 | .45 | .55 | 1215 | 2970 | 1815 | .4443 | .5557 | 1173 | 2933 | 1834 | 1154 | 2970 | 1815 | 61 | .96  |
| 6000 | .50 | .50 | 1500 | 3000 | 1500 | .4945 | .5055 | 1451 | 2967 | 1517 | 1434 | 3000 | 1500 | 66 | .74  |
| 6000 | .55 | .45 | 1815 | 2970 | 1215 | .5447 | .4553 | 1760 | 2941 | 1229 | 1745 | 2970 | 1215 | 70 | .56  |
| 6000 | .60 | .40 | 2160 | 2880 | 960  | .5951 | .4049 | 2099 | 2856 | 972  | 2087 | 2880 | 960  | 73 | .40  |
| 6000 | .65 | .35 | 2535 | 2730 | 735  | .6456 | .3544 | 2469 | 2711 | 744  | 2460 | 2730 | 735  | 75 | .28  |
| 6000 | .70 | .30 | 2940 | 2520 | 540  | .6962 | .3038 | 2871 | 2506 | 547  | 2864 | 2520 | 540  | 76 | .18  |
| 6000 | .75 | .25 | 3375 | 2250 | 375  | .7468 | .2532 | 3304 | 2240 | 380  | 3300 | 2250 | 375  | 75 | .11  |
| 6000 | .80 | .20 | 3840 | 1920 | 240  | .7975 | .2025 | 3770 | 1914 | 243  | 3767 | 1920 | 240  | 73 | .06  |
| 6000 | .85 | .15 | 4335 | 1530 | 135  | .8483 | .1517 | 4269 | 1527 | 137  | 4267 | 1530 | 135  | 68 | .02  |
| 6000 | .90 | .10 | 4860 | 1080 | 60   | .8990 | .1010 | 4801 | 1079 | 61   | 4800 | 1080 | 60   | 60 | .01  |
| 6000 | .95 | .05 | 5415 | 570  | 15   | .9496 | .0504 | 5370 | 570  | 15   | 5370 | 570  | 15   | 45 | .00  |
| 7000 | .05 | .95 | 18   | 665  | 6318 | .0489 | .9511 | 17   | 650  | 6325 | 9    | 665  | 6318 | 8  | 3.62 |
| 7000 | .10 | .90 | 70   | 1260 | 5670 | .0979 | .9021 | 67   | 1234 | 5683 | 54   | 1260 | 5670 | 16 | 3.22 |
| 7000 | .15 | .85 | 158  | 1785 | 5058 | .1470 | .8530 | 151  | 1750 | 5075 | 133  | 1785 | 5058 | 24 | 2.83 |
| 7000 | .20 | .80 | 280  | 2240 | 4480 | .1963 | .8037 | 269  | 2199 | 4501 | 248  | 2240 | 4480 | 32 | 2.46 |
| 7000 | .25 | .75 | 438  | 2625 | 3938 | .2457 | .7543 | 420  | 2580 | 3960 | 398  | 2625 | 3938 | 40 | 2.11 |
| 7000 | .30 | .70 | 630  | 2940 | 3430 | .2953 | .7047 | 606  | 2894 | 3453 | 583  | 2940 | 3430 | 47 | 1.78 |
| 7000 | .35 | .65 | 858  | 3185 | 2958 | .3450 | .6550 | 827  | 3139 | 2980 | 804  | 3185 | 2958 | 54 | 1.48 |
| 7000 | .40 | .60 | 1120 | 3360 | 2520 | .3948 | .6052 | 1082 | 3316 | 2542 | 1060 | 3360 | 2520 | 60 | 1.20 |
| 7000 | .45 | .55 | 1418 | 3465 | 2118 | .4448 | .5552 | 1372 | 3425 | 2138 | 1352 | 3465 | 2118 | 66 | .96  |

|      |     |     |      |      |      |       |       |      |      |      |      |      |      |    |      |
|------|-----|-----|------|------|------|-------|-------|------|------|------|------|------|------|----|------|
| 7000 | .50 | .50 | 1750 | 3500 | 1750 | .4949 | .5051 | 1697 | 3464 | 1768 | 1679 | 3500 | 1750 | 71 | .74  |
| 7000 | .55 | .45 | 2118 | 3465 | 1418 | .5451 | .4549 | 2058 | 3434 | 1433 | 2042 | 3465 | 1418 | 75 | .56  |
| 7000 | .60 | .40 | 2520 | 3360 | 1120 | .5955 | .4045 | 2454 | 3335 | 1133 | 2441 | 3360 | 1120 | 79 | .40  |
| 7000 | .65 | .35 | 2958 | 3185 | 858  | .6459 | .3541 | 2887 | 3165 | 868  | 2876 | 3185 | 858  | 81 | .28  |
| 7000 | .70 | .30 | 3430 | 2940 | 630  | .6964 | .3036 | 3355 | 2925 | 637  | 3348 | 2940 | 630  | 82 | .18  |
| 7000 | .75 | .25 | 3938 | 2625 | 438  | .7471 | .2529 | 3861 | 2615 | 443  | 3856 | 2625 | 438  | 81 | .11  |
| 7000 | .80 | .20 | 4480 | 2240 | 280  | .7977 | .2023 | 4404 | 2234 | 283  | 4401 | 2240 | 280  | 79 | .06  |
| 7000 | .85 | .15 | 5058 | 1785 | 158  | .8484 | .1516 | 4986 | 1782 | 159  | 4984 | 1785 | 158  | 73 | .02  |
| 7000 | .90 | .10 | 5670 | 1260 | 70   | .8991 | .1009 | 5606 | 1259 | 71   | 5606 | 1260 | 70   | 64 | .01  |
| 7000 | .95 | .05 | 6318 | 665  | 18   | .9497 | .0503 | 6269 | 665  | 18   | 6269 | 665  | 18   | 49 | .00  |
| 8000 | .05 | .95 | 20   | 760  | 7220 | .0490 | .9510 | 19   | 744  | 7228 | 11   | 760  | 7220 | 9  | 3.61 |
| 8000 | .10 | .90 | 80   | 1440 | 6480 | .0980 | .9020 | 77   | 1412 | 6494 | 63   | 1440 | 6480 | 17 | 3.21 |
| 8000 | .15 | .85 | 180  | 2040 | 5780 | .1472 | .8528 | 173  | 2002 | 5799 | 154  | 2040 | 5780 | 26 | 2.83 |
| 8000 | .20 | .80 | 320  | 2560 | 5120 | .1965 | .8035 | 308  | 2516 | 5142 | 286  | 2560 | 5120 | 34 | 2.45 |
| 8000 | .25 | .75 | 500  | 3000 | 4500 | .2460 | .7540 | 482  | 2952 | 4524 | 458  | 3000 | 4500 | 42 | 2.10 |
| 8000 | .30 | .70 | 720  | 3360 | 3920 | .2956 | .7044 | 695  | 3311 | 3945 | 670  | 3360 | 3920 | 50 | 1.78 |
| 8000 | .35 | .65 | 980  | 3640 | 3380 | .3453 | .6547 | 947  | 3591 | 3404 | 923  | 3640 | 3380 | 57 | 1.47 |
| 8000 | .40 | .60 | 1280 | 3840 | 2880 | .3951 | .6049 | 1239 | 3793 | 2903 | 1216 | 3840 | 2880 | 64 | 1.20 |
| 8000 | .45 | .55 | 1620 | 3960 | 2420 | .4451 | .5549 | 1571 | 3917 | 2442 | 1550 | 3960 | 2420 | 70 | .96  |
| 8000 | .50 | .50 | 2000 | 4000 | 2000 | .4952 | .5048 | 1943 | 3962 | 2019 | 1924 | 4000 | 2000 | 76 | .74  |
| 8000 | .55 | .45 | 2420 | 3960 | 1620 | .5454 | .4546 | 2356 | 3927 | 1636 | 2339 | 3960 | 1620 | 81 | .56  |
| 8000 | .60 | .40 | 2880 | 3840 | 1280 | .5957 | .4043 | 2809 | 3813 | 1294 | 2796 | 3840 | 1280 | 84 | .40  |
| 8000 | .65 | .35 | 3380 | 3640 | 980  | .6462 | .3538 | 3304 | 3619 | 991  | 3293 | 3640 | 980  | 87 | .28  |
| 8000 | .70 | .30 | 3920 | 3360 | 720  | .6967 | .3033 | 3840 | 3344 | 728  | 3832 | 3360 | 720  | 88 | .18  |
| 8000 | .75 | .25 | 4500 | 3000 | 500  | .7473 | .2527 | 4419 | 2989 | 505  | 4413 | 3000 | 500  | 87 | .11  |
| 8000 | .80 | .20 | 5120 | 2560 | 320  | .7979 | .2021 | 5039 | 2553 | 323  | 5036 | 2560 | 320  | 84 | .06  |
| 8000 | .85 | .15 | 5780 | 2040 | 180  | .8485 | .1515 | 5703 | 2036 | 182  | 5702 | 2040 | 180  | 78 | .02  |
| 8000 | .90 | .10 | 6480 | 1440 | 80   | .8991 | .1009 | 6412 | 1439 | 81   | 6411 | 1440 | 80   | 69 | .01  |
| 8000 | .95 | .05 | 7220 | 760  | 20   | .9497 | .0503 | 7168 | 760  | 20   | 7168 | 760  | 20   | 52 | .00  |
| 9000 | .05 | .95 | 23   | 855  | 8123 | .0490 | .9510 | 22   | 838  | 8131 | 13   | 855  | 8123 | 9  | 3.60 |
| 9000 | .10 | .90 | 90   | 1620 | 7290 | .0981 | .9019 | 87   | 1590 | 7305 | 71   | 1620 | 7290 | 19 | 3.20 |
| 9000 | .15 | .85 | 203  | 2295 | 6503 | .1474 | .8526 | 195  | 2255 | 6522 | 175  | 2295 | 6503 | 28 | 2.82 |
| 9000 | .20 | .80 | 360  | 2880 | 5760 | .1967 | .8033 | 347  | 2833 | 5783 | 324  | 2880 | 5760 | 36 | 2.45 |

|       |     |     |      |      |      |       |       |      |      |      |      |      |      |    |      |
|-------|-----|-----|------|------|------|-------|-------|------|------|------|------|------|------|----|------|
| 9000  | .25 | .75 | 563  | 3375 | 5063 | .2462 | .7538 | 543  | 3324 | 5088 | 517  | 3375 | 5063 | 45 | 2.10 |
| 9000  | .30 | .70 | 810  | 3780 | 4410 | .2958 | .7042 | 783  | 3728 | 4436 | 757  | 3780 | 4410 | 53 | 1.77 |
| 9000  | .35 | .65 | 1103 | 4095 | 3803 | .3456 | .6544 | 1067 | 4043 | 3828 | 1042 | 4095 | 3803 | 61 | 1.47 |
| 9000  | .40 | .60 | 1440 | 4320 | 3240 | .3954 | .6046 | 1397 | 4271 | 3265 | 1372 | 4320 | 3240 | 68 | 1.20 |
| 9000  | .45 | .55 | 1823 | 4455 | 2723 | .4454 | .5546 | 1771 | 4409 | 2745 | 1748 | 4455 | 2723 | 75 | .95  |
| 9000  | .50 | .50 | 2250 | 4500 | 2250 | .4955 | .5045 | 2190 | 4459 | 2270 | 2169 | 4500 | 2250 | 81 | .74  |
| 9000  | .55 | .45 | 2723 | 4455 | 1823 | .5457 | .4543 | 2655 | 4420 | 1840 | 2637 | 4455 | 1823 | 85 | .56  |
| 9000  | .60 | .40 | 3240 | 4320 | 1440 | .5960 | .4040 | 3165 | 4291 | 1454 | 3151 | 4320 | 1440 | 89 | .40  |
| 9000  | .65 | .35 | 3803 | 4095 | 1103 | .6464 | .3536 | 3722 | 4072 | 1114 | 3711 | 4095 | 1103 | 92 | .28  |
| 9000  | .70 | .30 | 4410 | 3780 | 810  | .6969 | .3031 | 4326 | 3763 | 818  | 4317 | 3780 | 810  | 93 | .18  |
| 9000  | .75 | .25 | 5063 | 3375 | 563  | .7474 | .2526 | 4976 | 3363 | 568  | 4970 | 3375 | 563  | 92 | .11  |
| 9000  | .80 | .20 | 5760 | 2880 | 360  | .7980 | .2020 | 5674 | 2873 | 364  | 5671 | 2880 | 360  | 89 | .06  |
| 9000  | .85 | .15 | 6503 | 2295 | 203  | .8486 | .1514 | 6421 | 2291 | 204  | 6419 | 2295 | 203  | 83 | .02  |
| 9000  | .90 | .10 | 7290 | 1620 | 90   | .8992 | .1008 | 7218 | 1619 | 91   | 7217 | 1620 | 90   | 73 | .01  |
| 9000  | .95 | .05 | 8123 | 855  | 23   | .9497 | .0503 | 8067 | 855  | 23   | 8067 | 855  | 23   | 55 | .00  |
| 10000 | .05 | .95 | 25   | 950  | 9025 | .0491 | .9509 | 24   | 932  | 9034 | 15   | 950  | 9025 | 10 | 3.59 |
| 10000 | .10 | .90 | 100  | 1800 | 8100 | .0982 | .9018 | 96   | 1768 | 8116 | 80   | 1800 | 8100 | 20 | 3.20 |
| 10000 | .15 | .85 | 225  | 2550 | 7225 | .1475 | .8525 | 217  | 2508 | 7246 | 196  | 2550 | 7225 | 29 | 2.81 |
| 10000 | .20 | .80 | 400  | 3200 | 6400 | .1969 | .8031 | 386  | 3151 | 6425 | 362  | 3200 | 6400 | 38 | 2.44 |
| 10000 | .25 | .75 | 625  | 3750 | 5625 | .2464 | .7536 | 604  | 3696 | 5652 | 578  | 3750 | 5625 | 47 | 2.09 |
| 10000 | .30 | .70 | 900  | 4200 | 4900 | .2961 | .7039 | 872  | 4145 | 4928 | 844  | 4200 | 4900 | 56 | 1.77 |
| 10000 | .35 | .65 | 1225 | 4550 | 4225 | .3458 | .6542 | 1188 | 4495 | 4252 | 1161 | 4550 | 4225 | 64 | 1.47 |
| 10000 | .40 | .60 | 1600 | 4800 | 3600 | .3957 | .6043 | 1554 | 4748 | 3626 | 1528 | 4800 | 3600 | 72 | 1.20 |
| 10000 | .45 | .55 | 2025 | 4950 | 3025 | .4456 | .5544 | 1970 | 4902 | 3049 | 1946 | 4950 | 3025 | 79 | .95  |
| 10000 | .50 | .50 | 2500 | 5000 | 2500 | .4957 | .5043 | 2437 | 4957 | 2521 | 2415 | 5000 | 2500 | 85 | .74  |
| 10000 | .55 | .45 | 3025 | 4950 | 2025 | .5459 | .4541 | 2953 | 4913 | 2043 | 2935 | 4950 | 2025 | 90 | .56  |
| 10000 | .60 | .40 | 3600 | 4800 | 1600 | .5962 | .4038 | 3521 | 4770 | 1615 | 3506 | 4800 | 1600 | 94 | .40  |
| 10000 | .65 | .35 | 4225 | 4550 | 1225 | .6466 | .3534 | 4140 | 4526 | 1237 | 4128 | 4550 | 1225 | 97 | .28  |
| 10000 | .70 | .30 | 4900 | 4200 | 900  | .6970 | .3030 | 4811 | 4182 | 909  | 4802 | 4200 | 900  | 98 | .18  |
| 10000 | .75 | .25 | 5625 | 3750 | 625  | .7475 | .2525 | 5534 | 3738 | 631  | 5528 | 3750 | 625  | 97 | .11  |
| 10000 | .80 | .20 | 6400 | 3200 | 400  | .7981 | .2019 | 6310 | 3192 | 404  | 6306 | 3200 | 400  | 94 | .06  |
| 10000 | .85 | .15 | 7225 | 2550 | 225  | .8487 | .1513 | 7139 | 2546 | 227  | 7137 | 2550 | 225  | 88 | .02  |
| 10000 | .90 | .10 | 8100 | 1800 | 100  | .8992 | .1008 | 8024 | 1798 | 101  | 8023 | 1800 | 100  | 77 | .01  |

|       |     |     |      |      |       |       |       |      |      |       |      |      |       |     |      |
|-------|-----|-----|------|------|-------|-------|-------|------|------|-------|------|------|-------|-----|------|
| 10000 | .95 | .05 | 9025 | 950  | 25    | .9497 | .0503 | 8967 | 950  | 25    | 8967 | 950  | 25    | 58  | .00  |
| 11000 | .05 | .95 | 28   | 1045 | 9928  | .0491 | .9509 | 27   | 1026 | 9937  | 17   | 1045 | 9928  | 10  | 3.59 |
| 11000 | .10 | .90 | 110  | 1980 | 8910  | .0983 | .9017 | 106  | 1947 | 8927  | 90   | 1980 | 8910  | 20  | 3.19 |
| 11000 | .15 | .85 | 248  | 2805 | 7948  | .1476 | .8524 | 239  | 2761 | 7970  | 217  | 2805 | 7948  | 30  | 2.81 |
| 11000 | .20 | .80 | 440  | 3520 | 7040  | .1971 | .8029 | 426  | 3468 | 7066  | 400  | 3520 | 7040  | 40  | 2.44 |
| 11000 | .25 | .75 | 688  | 4125 | 6188  | .2466 | .7534 | 666  | 4069 | 6216  | 638  | 4125 | 6188  | 50  | 2.09 |
| 11000 | .30 | .70 | 990  | 4620 | 5390  | .2962 | .7038 | 960  | 4562 | 5419  | 931  | 4620 | 5390  | 59  | 1.77 |
| 11000 | .35 | .65 | 1348 | 5005 | 4648  | .3460 | .6540 | 1309 | 4948 | 4676  | 1280 | 5005 | 4648  | 67  | 1.47 |
| 11000 | .40 | .60 | 1760 | 5280 | 3960  | .3959 | .6041 | 1712 | 5225 | 3987  | 1685 | 5280 | 3960  | 75  | 1.19 |
| 11000 | .45 | .55 | 2228 | 5445 | 3328  | .4458 | .5542 | 2170 | 5395 | 3353  | 2145 | 5445 | 3328  | 83  | .95  |
| 11000 | .50 | .50 | 2750 | 5500 | 2750  | .4959 | .5041 | 2683 | 5455 | 2772  | 2661 | 5500 | 2750  | 89  | .74  |
| 11000 | .55 | .45 | 3328 | 5445 | 2228  | .5461 | .4539 | 3252 | 5406 | 2247  | 3233 | 5445 | 2228  | 94  | .56  |
| 11000 | .60 | .40 | 3960 | 5280 | 1760  | .5964 | .4036 | 3877 | 5248 | 1776  | 3861 | 5280 | 1760  | 99  | .40  |
| 11000 | .65 | .35 | 4648 | 5005 | 1348  | .6467 | .3533 | 4559 | 4980 | 1360  | 4546 | 5005 | 1348  | 102 | .28  |
| 11000 | .70 | .30 | 5390 | 4620 | 990   | .6972 | .3028 | 5297 | 4601 | 999   | 5287 | 4620 | 990   | 103 | .18  |
| 11000 | .75 | .25 | 6188 | 4125 | 688   | .7477 | .2523 | 6092 | 4112 | 694   | 6086 | 4125 | 688   | 102 | .11  |
| 11000 | .80 | .20 | 7040 | 3520 | 440   | .7982 | .2018 | 6945 | 3512 | 444   | 6941 | 3520 | 440   | 99  | .06  |
| 11000 | .85 | .15 | 7948 | 2805 | 248   | .8487 | .1513 | 7858 | 2801 | 250   | 7855 | 2805 | 248   | 92  | .02  |
| 11000 | .90 | .10 | 8910 | 1980 | 110   | .8993 | .1007 | 8830 | 1978 | 111   | 8829 | 1980 | 110   | 81  | .01  |
| 11000 | .95 | .05 | 9928 | 1045 | 28    | .9497 | .0503 | 9867 | 1045 | 28    | 9867 | 1045 | 28    | 61  | .00  |
| 12000 | .05 | .95 | 30   | 1140 | 10830 | .0492 | .9508 | 29   | 1121 | 10840 | 19   | 1140 | 10830 | 11  | 3.58 |
| 12000 | .10 | .90 | 120  | 2160 | 9720  | .0984 | .9016 | 116  | 2125 | 9737  | 99   | 2160 | 9720  | 21  | 3.19 |
| 12000 | .15 | .85 | 270  | 3060 | 8670  | .1477 | .8523 | 261  | 3014 | 8693  | 238  | 3060 | 8670  | 32  | 2.80 |
| 12000 | .20 | .80 | 480  | 3840 | 7680  | .1972 | .8028 | 465  | 3786 | 7707  | 438  | 3840 | 7680  | 42  | 2.44 |
| 12000 | .25 | .75 | 750  | 4500 | 6750  | .2467 | .7533 | 727  | 4441 | 6779  | 698  | 4500 | 6750  | 52  | 2.09 |
| 12000 | .30 | .70 | 1080 | 5040 | 5880  | .2964 | .7036 | 1049 | 4979 | 5910  | 1019 | 5040 | 5880  | 61  | 1.76 |
| 12000 | .35 | .65 | 1470 | 5460 | 5070  | .3462 | .6538 | 1430 | 5400 | 5100  | 1400 | 5460 | 5070  | 70  | 1.46 |
| 12000 | .40 | .60 | 1920 | 5760 | 4320  | .3960 | .6040 | 1870 | 5703 | 4349  | 1841 | 5760 | 4320  | 79  | 1.19 |
| 12000 | .45 | .55 | 2430 | 5940 | 3630  | .4460 | .5540 | 2370 | 5887 | 3656  | 2344 | 5940 | 3630  | 86  | .95  |
| 12000 | .50 | .50 | 3000 | 6000 | 3000  | .4961 | .5039 | 2930 | 5953 | 3023  | 2907 | 6000 | 3000  | 93  | .74  |
| 12000 | .55 | .45 | 3630 | 5940 | 2430  | .5463 | .4537 | 3552 | 5900 | 2450  | 3531 | 5940 | 2430  | 99  | .55  |
| 12000 | .60 | .40 | 4320 | 5760 | 1920  | .5965 | .4035 | 4234 | 5727 | 1937  | 4217 | 5760 | 1920  | 103 | .40  |
| 12000 | .65 | .35 | 5070 | 5460 | 1470  | .6469 | .3531 | 4977 | 5434 | 1483  | 4964 | 5460 | 1470  | 106 | .28  |

|       |     |     |       |      |       |       |       |       |      |       |       |      |       |     |      |
|-------|-----|-----|-------|------|-------|-------|-------|-------|------|-------|-------|------|-------|-----|------|
| 12000 | .70 | .30 | 5880  | 5040 | 1080  | .6973 | .3027 | 5782  | 5021 | 1090  | 5773  | 5040 | 1080  | 107 | .18  |
| 12000 | .75 | .25 | 6750  | 4500 | 750   | .7478 | .2522 | 6650  | 4487 | 757   | 6643  | 4500 | 750   | 107 | .11  |
| 12000 | .80 | .20 | 7680  | 3840 | 480   | .7983 | .2017 | 7581  | 3832 | 484   | 7577  | 3840 | 480   | 103 | .06  |
| 12000 | .85 | .15 | 8670  | 3060 | 270   | .8488 | .1512 | 8576  | 3056 | 272   | 8574  | 3060 | 270   | 96  | .02  |
| 12000 | .90 | .10 | 9720  | 2160 | 120   | .8993 | .1007 | 9637  | 2158 | 121   | 9636  | 2160 | 120   | 84  | .01  |
| 12000 | .95 | .05 | 10830 | 1140 | 30    | .9497 | .0503 | 10766 | 1140 | 30    | 10766 | 1140 | 30    | 64  | .00  |
| 13000 | .05 | .95 | 33    | 1235 | 11733 | .0492 | .9508 | 31    | 1215 | 11743 | 21    | 1235 | 11733 | 11  | 3.58 |
| 13000 | .10 | .90 | 130   | 2340 | 10530 | .0985 | .9015 | 126   | 2304 | 10548 | 108   | 2340 | 10530 | 22  | 3.18 |
| 13000 | .15 | .85 | 293   | 3315 | 9393  | .1478 | .8522 | 283   | 3267 | 9417  | 259   | 3315 | 9393  | 33  | 2.80 |
| 13000 | .20 | .80 | 520   | 4160 | 8320  | .1973 | .8027 | 504   | 4104 | 8348  | 476   | 4160 | 8320  | 44  | 2.43 |
| 13000 | .25 | .75 | 813   | 4875 | 7313  | .2469 | .7531 | 789   | 4814 | 7343  | 758   | 4875 | 7313  | 54  | 2.09 |
| 13000 | .30 | .70 | 1170  | 5460 | 6370  | .2965 | .7035 | 1138  | 5397 | 6401  | 1106  | 5460 | 6370  | 64  | 1.76 |
| 13000 | .35 | .65 | 1593  | 5915 | 5493  | .3463 | .6537 | 1550  | 5853 | 5524  | 1519  | 5915 | 5493  | 73  | 1.46 |
| 13000 | .40 | .60 | 2080  | 6240 | 4680  | .3962 | .6038 | 2028  | 6181 | 4710  | 1998  | 6240 | 4680  | 82  | 1.19 |
| 13000 | .45 | .55 | 2633  | 6435 | 3933  | .4462 | .5538 | 2570  | 6380 | 3960  | 2543  | 6435 | 3933  | 90  | .95  |
| 13000 | .50 | .50 | 3250  | 6500 | 3250  | .4963 | .5037 | 3178  | 6451 | 3274  | 3153  | 6500 | 3250  | 97  | .74  |
| 13000 | .55 | .45 | 3933  | 6435 | 2633  | .5464 | .4536 | 3851  | 6393 | 2653  | 3830  | 6435 | 2633  | 103 | .55  |
| 13000 | .60 | .40 | 4680  | 6240 | 2080  | .5967 | .4033 | 4590  | 6205 | 2097  | 4573  | 6240 | 2080  | 107 | .40  |
| 13000 | .65 | .35 | 5493  | 5915 | 1593  | .6470 | .3530 | 5396  | 5888 | 1606  | 5382  | 5915 | 1593  | 110 | .28  |
| 13000 | .70 | .30 | 6370  | 5460 | 1170  | .6974 | .3026 | 6268  | 5440 | 1180  | 6258  | 5460 | 1170  | 112 | .18  |
| 13000 | .75 | .25 | 7313  | 4875 | 813   | .7478 | .2522 | 7209  | 4861 | 819   | 7202  | 4875 | 813   | 111 | .11  |
| 13000 | .80 | .20 | 8320  | 4160 | 520   | .7983 | .2017 | 8217  | 4151 | 524   | 8213  | 4160 | 520   | 107 | .06  |
| 13000 | .85 | .15 | 9393  | 3315 | 293   | .8488 | .1512 | 9295  | 3310 | 295   | 9292  | 3315 | 293   | 100 | .02  |
| 13000 | .90 | .10 | 10530 | 2340 | 130   | .8993 | .1007 | 10443 | 2338 | 131   | 10442 | 2340 | 130   | 88  | .01  |
| 13000 | .95 | .05 | 11733 | 1235 | 33    | .9497 | .0503 | 11666 | 1235 | 33    | 11666 | 1235 | 33    | 66  | .00  |
| 14000 | .05 | .95 | 35    | 1330 | 12635 | .0492 | .9508 | 34    | 1309 | 12645 | 23    | 1330 | 12635 | 12  | 3.57 |
| 14000 | .10 | .90 | 140   | 2520 | 11340 | .0985 | .9015 | 136   | 2483 | 11359 | 117   | 2520 | 11340 | 23  | 3.18 |
| 14000 | .15 | .85 | 315   | 3570 | 10115 | .1479 | .8521 | 306   | 3520 | 10140 | 281   | 3570 | 10115 | 34  | 2.80 |
| 14000 | .20 | .80 | 560   | 4480 | 8960  | .1974 | .8026 | 544   | 4422 | 8989  | 515   | 4480 | 8960  | 45  | 2.43 |
| 14000 | .25 | .75 | 875   | 5250 | 7875  | .2470 | .7530 | 851   | 5187 | 7907  | 819   | 5250 | 7875  | 56  | 2.08 |
| 14000 | .30 | .70 | 1260  | 5880 | 6860  | .2967 | .7033 | 1226  | 5815 | 6893  | 1194  | 5880 | 6860  | 66  | 1.76 |
| 14000 | .35 | .65 | 1715  | 6370 | 5915  | .3465 | .6535 | 1671  | 6305 | 5947  | 1639  | 6370 | 5915  | 76  | 1.46 |
| 14000 | .40 | .60 | 2240  | 6720 | 5040  | .3963 | .6037 | 2186  | 6658 | 5071  | 2155  | 6720 | 5040  | 85  | 1.19 |



|       |     |     |       |      |       |       |       |       |      |       |       |      |       |     |      |
|-------|-----|-----|-------|------|-------|-------|-------|-------|------|-------|-------|------|-------|-----|------|
| 14000 | .45 | .55 | 2835  | 6930 | 4235  | .4463 | .5537 | 2770  | 6873 | 4263  | 2742  | 6930 | 4235  | 93  | .95  |
| 14000 | .50 | .50 | 3500  | 7000 | 3500  | .4964 | .5036 | 3425  | 6949 | 3525  | 3400  | 7000 | 3500  | 100 | .74  |
| 14000 | .55 | .45 | 4235  | 6930 | 2835  | .5465 | .4535 | 4150  | 6887 | 2857  | 4128  | 6930 | 2835  | 107 | .55  |
| 14000 | .60 | .40 | 5040  | 6720 | 2240  | .5968 | .4032 | 4947  | 6684 | 2258  | 4929  | 6720 | 2240  | 111 | .40  |
| 14000 | .65 | .35 | 5915  | 6370 | 1715  | .6471 | .3529 | 5815  | 6342 | 1729  | 5800  | 6370 | 1715  | 115 | .28  |
| 14000 | .70 | .30 | 6860  | 5880 | 1260  | .6975 | .3025 | 6755  | 5859 | 1271  | 6744  | 5880 | 1260  | 116 | .18  |
| 14000 | .75 | .25 | 7875  | 5250 | 875   | .7479 | .2521 | 7767  | 5236 | 882   | 7760  | 5250 | 875   | 115 | .11  |
| 14000 | .80 | .20 | 8960  | 4480 | 560   | .7984 | .2016 | 8853  | 4471 | 564   | 8849  | 4480 | 560   | 111 | .06  |
| 14000 | .85 | .15 | 10115 | 3570 | 315   | .8489 | .1511 | 10014 | 3565 | 317   | 10011 | 3570 | 315   | 104 | .02  |
| 14000 | .90 | .10 | 11340 | 2520 | 140   | .8993 | .1007 | 11250 | 2518 | 141   | 11249 | 2520 | 140   | 91  | .01  |
| 14000 | .95 | .05 | 12635 | 1330 | 35    | .9498 | .0502 | 12566 | 1330 | 35    | 12566 | 1330 | 35    | 69  | .00  |
| 15000 | .05 | .95 | 38    | 1425 | 13538 | .0492 | .9508 | 36    | 1403 | 13548 | 26    | 1425 | 13538 | 12  | 3.57 |
| 15000 | .10 | .90 | 150   | 2700 | 12150 | .0986 | .9014 | 145   | 2661 | 12169 | 126   | 2700 | 12150 | 24  | 3.18 |
| 15000 | .15 | .85 | 338   | 3825 | 10838 | .1480 | .8520 | 328   | 3773 | 10863 | 302   | 3825 | 10838 | 36  | 2.79 |
| 15000 | .20 | .80 | 600   | 4800 | 9600  | .1975 | .8025 | 583   | 4740 | 9630  | 553   | 4800 | 9600  | 47  | 2.43 |
| 15000 | .25 | .75 | 938   | 5625 | 8438  | .2471 | .7529 | 912   | 5559 | 8470  | 879   | 5625 | 8438  | 58  | 2.08 |
| 15000 | .30 | .70 | 1350  | 6300 | 7350  | .2968 | .7032 | 1315  | 6232 | 7384  | 1281  | 6300 | 7350  | 69  | 1.76 |
| 15000 | .35 | .65 | 1838  | 6825 | 6338  | .3466 | .6534 | 1792  | 6758 | 6371  | 1759  | 6825 | 6338  | 79  | 1.46 |
| 15000 | .40 | .60 | 2400  | 7200 | 5400  | .3965 | .6035 | 2344  | 7136 | 5432  | 2312  | 7200 | 5400  | 88  | 1.19 |
| 15000 | .45 | .55 | 3038  | 7425 | 4538  | .4464 | .5536 | 2970  | 7366 | 4567  | 2941  | 7425 | 4538  | 96  | .95  |
| 15000 | .50 | .50 | 3750  | 7500 | 3750  | .4965 | .5035 | 3672  | 7448 | 3776  | 3646  | 7500 | 3750  | 104 | .74  |
| 15000 | .55 | .45 | 4538  | 7425 | 3038  | .5467 | .4533 | 4450  | 7380 | 3060  | 4427  | 7425 | 3038  | 110 | .55  |
| 15000 | .60 | .40 | 5400  | 7200 | 2400  | .5969 | .4031 | 5303  | 7163 | 2419  | 5285  | 7200 | 2400  | 115 | .40  |
| 15000 | .65 | .35 | 6338  | 6825 | 1838  | .6472 | .3528 | 6234  | 6796 | 1852  | 6219  | 6825 | 1838  | 119 | .28  |
| 15000 | .70 | .30 | 7350  | 6300 | 1350  | .6976 | .3024 | 7241  | 6278 | 1361  | 7230  | 6300 | 1350  | 120 | .18  |
| 15000 | .75 | .25 | 8438  | 5625 | 938   | .7480 | .2520 | 8326  | 5610 | 945   | 8318  | 5625 | 938   | 119 | .11  |
| 15000 | .80 | .20 | 9600  | 4800 | 600   | .7985 | .2015 | 9489  | 4791 | 605   | 9485  | 4800 | 600   | 115 | .06  |
| 15000 | .85 | .15 | 10838 | 3825 | 338   | .8489 | .1511 | 10732 | 3820 | 340   | 10730 | 3825 | 338   | 107 | .02  |
| 15000 | .90 | .10 | 12150 | 2700 | 150   | .8994 | .1006 | 12057 | 2698 | 151   | 12056 | 2700 | 150   | 94  | .01  |
| 15000 | .95 | .05 | 13538 | 1425 | 38    | .9498 | .0502 | 13466 | 1425 | 38    | 13466 | 1425 | 38    | 71  | .00  |
| 16000 | .05 | .95 | 40    | 1520 | 14440 | .0493 | .9507 | 39    | 1498 | 14451 | 28    | 1520 | 14440 | 12  | 3.57 |
| 16000 | .10 | .90 | 160   | 2880 | 12960 | .0986 | .9014 | 155   | 2840 | 12980 | 135   | 2880 | 12960 | 25  | 3.17 |
| 16000 | .15 | .85 | 360   | 4080 | 11560 | .1480 | .8520 | 350   | 4027 | 11587 | 323   | 4080 | 11560 | 37  | 2.79 |

|       |     |     |       |      |       |       |       |       |      |       |       |      |       |     |      |
|-------|-----|-----|-------|------|-------|-------|-------|-------|------|-------|-------|------|-------|-----|------|
| 16000 | .20 | .80 | 640   | 5120 | 10240 | .1976 | .8024 | 623   | 5058 | 10271 | 591   | 5120 | 10240 | 49  | 2.43 |
| 16000 | .25 | .75 | 1000  | 6000 | 9000  | .2472 | .7528 | 974   | 5932 | 9034  | 940   | 6000 | 9000  | 60  | 2.08 |
| 16000 | .30 | .70 | 1440  | 6720 | 7840  | .2969 | .7031 | 1404  | 6650 | 7875  | 1369  | 6720 | 7840  | 71  | 1.76 |
| 16000 | .35 | .65 | 1960  | 7280 | 6760  | .3467 | .6533 | 1913  | 7211 | 6795  | 1879  | 7280 | 6760  | 81  | 1.46 |
| 16000 | .40 | .60 | 2560  | 7680 | 5760  | .3966 | .6034 | 2502  | 7614 | 5793  | 2469  | 7680 | 5760  | 91  | 1.19 |
| 16000 | .45 | .55 | 3240  | 7920 | 4840  | .4466 | .5534 | 3171  | 7859 | 4870  | 3140  | 7920 | 4840  | 100 | .95  |
| 16000 | .50 | .50 | 4000  | 8000 | 4000  | .4966 | .5034 | 3920  | 7946 | 4027  | 3893  | 8000 | 4000  | 107 | .74  |
| 16000 | .55 | .45 | 4840  | 7920 | 3240  | .5468 | .4532 | 4749  | 7874 | 3263  | 4726  | 7920 | 3240  | 114 | .55  |
| 16000 | .60 | .40 | 5760  | 7680 | 2560  | .5970 | .4030 | 5660  | 7642 | 2579  | 5641  | 7680 | 2560  | 119 | .40  |
| 16000 | .65 | .35 | 6760  | 7280 | 1960  | .6473 | .3527 | 6653  | 7250 | 1975  | 6638  | 7280 | 1960  | 122 | .28  |
| 16000 | .70 | .30 | 7840  | 6720 | 1440  | .6977 | .3023 | 7727  | 6698 | 1451  | 7716  | 6720 | 1440  | 124 | .18  |
| 16000 | .75 | .25 | 9000  | 6000 | 1000  | .7481 | .2519 | 8885  | 5985 | 1008  | 8877  | 6000 | 1000  | 123 | .11  |
| 16000 | .80 | .20 | 10240 | 5120 | 640   | .7985 | .2015 | 10126 | 5110 | 645   | 10121 | 5120 | 640   | 119 | .06  |
| 16000 | .85 | .15 | 11560 | 4080 | 360   | .8490 | .1510 | 11452 | 4075 | 363   | 11449 | 4080 | 360   | 111 | .02  |
| 16000 | .90 | .10 | 12960 | 2880 | 160   | .8994 | .1006 | 12864 | 2878 | 161   | 12863 | 2880 | 160   | 97  | .01  |
| 16000 | .95 | .05 | 14440 | 1520 | 40    | .9498 | .0502 | 14367 | 1520 | 40    | 14366 | 1520 | 40    | 74  | .00  |
| 17000 | .05 | .95 | 43    | 1615 | 15343 | .0493 | .9507 | 41    | 1592 | 15354 | 30    | 1615 | 15343 | 13  | 3.56 |
| 17000 | .10 | .90 | 170   | 3060 | 13770 | .0987 | .9013 | 165   | 3019 | 13791 | 145   | 3060 | 13770 | 25  | 3.17 |
| 17000 | .15 | .85 | 383   | 4335 | 12283 | .1481 | .8519 | 372   | 4280 | 12310 | 345   | 4335 | 12283 | 38  | 2.79 |
| 17000 | .20 | .80 | 680   | 5440 | 10880 | .1976 | .8024 | 662   | 5376 | 10912 | 630   | 5440 | 10880 | 50  | 2.42 |
| 17000 | .25 | .75 | 1063  | 6375 | 9563  | .2473 | .7527 | 1036  | 6305 | 9597  | 1001  | 6375 | 9563  | 62  | 2.08 |
| 17000 | .30 | .70 | 1530  | 7140 | 8330  | .2970 | .7030 | 1493  | 7068 | 8366  | 1457  | 7140 | 8330  | 73  | 1.76 |
| 17000 | .35 | .65 | 2083  | 7735 | 7183  | .3468 | .6532 | 2034  | 7664 | 7218  | 1999  | 7735 | 7183  | 84  | 1.46 |
| 17000 | .40 | .60 | 2720  | 8160 | 6120  | .3967 | .6033 | 2660  | 8092 | 6154  | 2626  | 8160 | 6120  | 94  | 1.19 |
| 17000 | .45 | .55 | 3443  | 8415 | 5143  | .4467 | .5533 | 3371  | 8352 | 5174  | 3340  | 8415 | 5143  | 103 | .95  |
| 17000 | .50 | .50 | 4250  | 8500 | 4250  | .4967 | .5033 | 4167  | 8444 | 4278  | 4139  | 8500 | 4250  | 111 | .73  |
| 17000 | .55 | .45 | 5143  | 8415 | 3443  | .5469 | .4531 | 5049  | 8367 | 3466  | 5025  | 8415 | 3443  | 117 | .55  |
| 17000 | .60 | .40 | 6120  | 8160 | 2720  | .5971 | .4029 | 6017  | 8120 | 2740  | 5997  | 8160 | 2720  | 123 | .40  |
| 17000 | .65 | .35 | 7183  | 7735 | 2083  | .6474 | .3526 | 7072  | 7704 | 2098  | 7056  | 7735 | 2083  | 126 | .28  |
| 17000 | .70 | .30 | 8330  | 7140 | 1530  | .6977 | .3023 | 8214  | 7117 | 1542  | 8202  | 7140 | 1530  | 128 | .18  |
| 17000 | .75 | .25 | 9563  | 6375 | 1063  | .7481 | .2519 | 9444  | 6359 | 1070  | 9436  | 6375 | 1063  | 127 | .11  |
| 17000 | .80 | .20 | 10880 | 5440 | 680   | .7985 | .2015 | 10762 | 5430 | 685   | 10757 | 5440 | 680   | 123 | .06  |
| 17000 | .85 | .15 | 12283 | 4335 | 383   | .8490 | .1510 | 12171 | 4330 | 385   | 12168 | 4335 | 383   | 114 | .02  |

|       |     |     |       |      |       |       |       |       |      |       |       |      |       |     |      |
|-------|-----|-----|-------|------|-------|-------|-------|-------|------|-------|-------|------|-------|-----|------|
| 17000 | .90 | .10 | 13770 | 3060 | 170   | .8994 | .1006 | 13671 | 3058 | 171   | 13670 | 3060 | 170   | 100 | .01  |
| 17000 | .95 | .05 | 15343 | 1615 | 43    | .9498 | .0502 | 15267 | 1615 | 43    | 15267 | 1615 | 43    | 76  | .00  |
| 18000 | .05 | .95 | 45    | 1710 | 16245 | .0493 | .9507 | 44    | 1686 | 16257 | 32    | 1710 | 16245 | 13  | 3.56 |
| 18000 | .10 | .90 | 180   | 3240 | 14580 | .0987 | .9013 | 175   | 3198 | 14601 | 154   | 3240 | 14580 | 26  | 3.17 |
| 18000 | .15 | .85 | 405   | 4590 | 13005 | .1482 | .8518 | 394   | 4534 | 13033 | 366   | 4590 | 13005 | 39  | 2.79 |
| 18000 | .20 | .80 | 720   | 5760 | 11520 | .1977 | .8023 | 702   | 5694 | 11553 | 668   | 5760 | 11520 | 52  | 2.42 |
| 18000 | .25 | .75 | 1125  | 6750 | 10125 | .2473 | .7527 | 1097  | 6678 | 10161 | 1061  | 6750 | 10125 | 64  | 2.08 |
| 18000 | .30 | .70 | 1620  | 7560 | 8820  | .2971 | .7029 | 1582  | 7486 | 8857  | 1545  | 7560 | 8820  | 75  | 1.75 |
| 18000 | .35 | .65 | 2205  | 8190 | 7605  | .3469 | .6531 | 2155  | 8117 | 7642  | 2119  | 8190 | 7605  | 86  | 1.46 |
| 18000 | .40 | .60 | 2880  | 8640 | 6480  | .3968 | .6032 | 2818  | 8570 | 6515  | 2784  | 8640 | 6480  | 96  | 1.19 |
| 18000 | .45 | .55 | 3645  | 8910 | 5445  | .4468 | .5532 | 3571  | 8846 | 5477  | 3539  | 8910 | 5445  | 106 | .95  |
| 18000 | .50 | .50 | 4500  | 9000 | 4500  | .4968 | .5032 | 4415  | 8943 | 4529  | 4386  | 9000 | 4500  | 114 | .73  |
| 18000 | .55 | .45 | 5445  | 8910 | 3645  | .5470 | .4530 | 5349  | 8861 | 3670  | 5324  | 8910 | 3645  | 121 | .55  |
| 18000 | .60 | .40 | 6480  | 8640 | 2880  | .5972 | .4028 | 6374  | 8599 | 2900  | 6354  | 8640 | 2880  | 126 | .40  |
| 18000 | .65 | .35 | 7605  | 8190 | 2205  | .6475 | .3525 | 7491  | 8158 | 2221  | 7475  | 8190 | 2205  | 130 | .28  |
| 18000 | .70 | .30 | 8820  | 7560 | 1620  | .6978 | .3022 | 8700  | 7536 | 1632  | 8689  | 7560 | 1620  | 131 | .18  |
| 18000 | .75 | .25 | 10125 | 6750 | 1125  | .7482 | .2518 | 10003 | 6734 | 1133  | 9995  | 6750 | 1125  | 130 | .11  |
| 18000 | .80 | .20 | 11520 | 5760 | 720   | .7986 | .2014 | 11399 | 5750 | 725   | 11394 | 5760 | 720   | 126 | .06  |
| 18000 | .85 | .15 | 13005 | 4590 | 405   | .8490 | .1510 | 12890 | 4585 | 408   | 12887 | 4590 | 405   | 118 | .02  |
| 18000 | .90 | .10 | 14580 | 3240 | 180   | .8994 | .1006 | 14478 | 3238 | 181   | 14477 | 3240 | 180   | 103 | .01  |
| 18000 | .95 | .05 | 16245 | 1710 | 45    | .9498 | .0502 | 16167 | 1710 | 45    | 16167 | 1710 | 45    | 78  | .00  |
| 19000 | .05 | .95 | 48    | 1805 | 17148 | .0493 | .9507 | 46    | 1781 | 17160 | 34    | 1805 | 17148 | 13  | 3.56 |
| 19000 | .10 | .90 | 190   | 3420 | 15390 | .0987 | .9013 | 185   | 3376 | 15412 | 163   | 3420 | 15390 | 27  | 3.17 |
| 19000 | .15 | .85 | 428   | 4845 | 13728 | .1482 | .8518 | 416   | 4787 | 13757 | 387   | 4845 | 13728 | 40  | 2.79 |
| 19000 | .20 | .80 | 760   | 6080 | 12160 | .1978 | .8022 | 741   | 6012 | 12194 | 707   | 6080 | 12160 | 53  | 2.42 |
| 19000 | .25 | .75 | 1188  | 7125 | 10688 | .2474 | .7526 | 1159  | 7051 | 10724 | 1122  | 7125 | 10688 | 65  | 2.08 |
| 19000 | .30 | .70 | 1710  | 7980 | 9310  | .2971 | .7029 | 1671  | 7904 | 9348  | 1633  | 7980 | 9310  | 77  | 1.75 |
| 19000 | .35 | .65 | 2328  | 8645 | 8028  | .3470 | .6530 | 2277  | 8570 | 8065  | 2239  | 8645 | 8028  | 89  | 1.46 |
| 19000 | .40 | .60 | 3040  | 9120 | 6840  | .3969 | .6031 | 2977  | 9048 | 6876  | 2941  | 9120 | 6840  | 99  | 1.19 |
| 19000 | .45 | .55 | 3848  | 9405 | 5748  | .4468 | .5532 | 3772  | 9339 | 5781  | 3739  | 9405 | 5748  | 109 | .95  |
| 19000 | .50 | .50 | 4750  | 9500 | 4750  | .4969 | .5031 | 4662  | 9441 | 4779  | 4633  | 9500 | 4750  | 117 | .73  |
| 19000 | .55 | .45 | 5748  | 9405 | 3848  | .5470 | .4530 | 5649  | 9354 | 3873  | 5623  | 9405 | 3848  | 124 | .55  |
| 19000 | .60 | .40 | 6840  | 9120 | 3040  | .5973 | .4027 | 6731  | 9078 | 3061  | 6710  | 9120 | 3040  | 130 | .40  |

|       |     |     |       |       |       |       |       |       |      |       |       |       |       |     |      |
|-------|-----|-----|-------|-------|-------|-------|-------|-------|------|-------|-------|-------|-------|-----|------|
| 19000 | .65 | .35 | 8028  | 8645  | 2328  | .6475 | .3525 | 7911  | 8612 | 2344  | 7894  | 8645  | 2328  | 133 | .28  |
| 19000 | .70 | .30 | 9310  | 7980  | 1710  | .6979 | .3021 | 9187  | 7956 | 1722  | 9175  | 7980  | 1710  | 135 | .18  |
| 19000 | .75 | .25 | 10688 | 7125  | 1188  | .7482 | .2518 | 10562 | 7108 | 1196  | 10553 | 7125  | 1188  | 134 | .11  |
| 19000 | .80 | .20 | 12160 | 6080  | 760   | .7986 | .2014 | 12036 | 6070 | 765   | 12030 | 6080  | 760   | 130 | .06  |
| 19000 | .85 | .15 | 13728 | 4845  | 428   | .8490 | .1510 | 13609 | 4840 | 430   | 13607 | 4845  | 428   | 121 | .02  |
| 19000 | .90 | .10 | 15390 | 3420  | 190   | .8994 | .1006 | 15285 | 3418 | 191   | 15284 | 3420  | 190   | 106 | .01  |
| 19000 | .95 | .05 | 17148 | 1805  | 48    | .9498 | .0502 | 17068 | 1805 | 48    | 17067 | 1805  | 48    | 80  | .00  |
| 20000 | .05 | .95 | 50    | 1900  | 18050 | .0493 | .9507 | 49    | 1875 | 18063 | 36    | 1900  | 18050 | 14  | 3.55 |
| 20000 | .10 | .90 | 200   | 3600  | 16200 | .0988 | .9012 | 195   | 3555 | 16222 | 172   | 3600  | 16200 | 28  | 3.16 |
| 20000 | .15 | .85 | 450   | 5100  | 14450 | .1482 | .8518 | 439   | 5040 | 14480 | 409   | 5100  | 14450 | 41  | 2.78 |
| 20000 | .20 | .80 | 800   | 6400  | 12800 | .1978 | .8022 | 781   | 6330 | 12835 | 746   | 6400  | 12800 | 54  | 2.42 |
| 20000 | .25 | .75 | 1250  | 7500  | 11250 | .2475 | .7525 | 1221  | 7424 | 11288 | 1183  | 7500  | 11250 | 67  | 2.07 |
| 20000 | .30 | .70 | 1800  | 8400  | 9800  | .2972 | .7028 | 1760  | 8322 | 9839  | 1721  | 8400  | 9800  | 79  | 1.75 |
| 20000 | .35 | .65 | 2450  | 9100  | 8450  | .3470 | .6530 | 2398  | 9023 | 8489  | 2359  | 9100  | 8450  | 91  | 1.46 |
| 20000 | .40 | .60 | 3200  | 9600  | 7200  | .3969 | .6031 | 3135  | 9526 | 7237  | 3098  | 9600  | 7200  | 102 | 1.19 |
| 20000 | .45 | .55 | 4050  | 9900  | 6050  | .4469 | .5531 | 3972  | 9832 | 6084  | 3939  | 9900  | 6050  | 111 | .94  |
| 20000 | .50 | .50 | 5000  | 10000 | 5000  | .4970 | .5030 | 4910  | 9940 | 5030  | 4880  | 10000 | 5000  | 120 | .73  |
| 20000 | .55 | .45 | 6050  | 9900  | 4050  | .5471 | .4529 | 5949  | 9848 | 4076  | 5923  | 9900  | 4050  | 127 | .55  |
| 20000 | .60 | .40 | 7200  | 9600  | 3200  | .5973 | .4027 | 7088  | 9557 | 3221  | 7067  | 9600  | 3200  | 133 | .40  |
| 20000 | .65 | .35 | 8450  | 9100  | 2450  | .6476 | .3524 | 8330  | 9066 | 2467  | 8313  | 9100  | 2450  | 137 | .28  |
| 20000 | .70 | .30 | 9800  | 8400  | 1800  | .6979 | .3021 | 9674  | 8375 | 1813  | 9661  | 8400  | 1800  | 139 | .18  |
| 20000 | .75 | .25 | 11250 | 7500  | 1250  | .7483 | .2517 | 11121 | 7483 | 1259  | 11112 | 7500  | 1250  | 138 | .11  |
| 20000 | .80 | .20 | 12800 | 6400  | 800   | .7987 | .2013 | 12672 | 6389 | 805   | 12667 | 6400  | 800   | 133 | .06  |
| 20000 | .85 | .15 | 14450 | 5100  | 450   | .8491 | .1509 | 14329 | 5094 | 453   | 14326 | 5100  | 450   | 124 | .02  |
| 20000 | .90 | .10 | 16200 | 3600  | 200   | .8995 | .1005 | 16092 | 3598 | 201   | 16091 | 3600  | 200   | 109 | .01  |
| 20000 | .95 | .05 | 18050 | 1900  | 50    | .9498 | .0502 | 17968 | 1900 | 50    | 17968 | 1900  | 50    | 82  | .00  |
| 21000 | .05 | .95 | 53    | 1995  | 18953 | .0494 | .9506 | 51    | 1969 | 18965 | 38    | 1995  | 18953 | 14  | 3.55 |
| 21000 | .10 | .90 | 210   | 3780  | 17010 | .0988 | .9012 | 205   | 3734 | 17033 | 182   | 3780  | 17010 | 28  | 3.16 |
| 21000 | .15 | .85 | 473   | 5355  | 15173 | .1483 | .8517 | 461   | 5294 | 15203 | 430   | 5355  | 15173 | 42  | 2.78 |
| 21000 | .20 | .80 | 840   | 6720  | 13440 | .1979 | .8021 | 820   | 6649 | 13476 | 784   | 6720  | 13440 | 56  | 2.42 |
| 21000 | .25 | .75 | 1313  | 7875  | 11813 | .2475 | .7525 | 1283  | 7797 | 11851 | 1244  | 7875  | 11813 | 69  | 2.07 |
| 21000 | .30 | .70 | 1890  | 8820  | 10290 | .2973 | .7027 | 1849  | 8740 | 10330 | 1809  | 8820  | 10290 | 81  | 1.75 |
| 21000 | .35 | .65 | 2573  | 9555  | 8873  | .3471 | .6529 | 2519  | 9476 | 8912  | 2479  | 9555  | 8873  | 93  | 1.45 |

|       |     |     |       |       |       |       |       |       |       |       |       |       |       |     |      |
|-------|-----|-----|-------|-------|-------|-------|-------|-------|-------|-------|-------|-------|-------|-----|------|
| 21000 | .40 | .60 | 3360  | 10080 | 7560  | .3970 | .6030 | 3294  | 10005 | 7598  | 3256  | 10080 | 7560  | 104 | 1.19 |
| 21000 | .45 | .55 | 4253  | 10395 | 6353  | .4470 | .5530 | 4173  | 10326 | 6387  | 4138  | 10395 | 6353  | 114 | .94  |
| 21000 | .50 | .50 | 5250  | 10500 | 5250  | .4971 | .5029 | 5158  | 10438 | 5281  | 5127  | 10500 | 5250  | 123 | .73  |
| 21000 | .55 | .45 | 6353  | 10395 | 4253  | .5472 | .4528 | 6249  | 10342 | 4279  | 6222  | 10395 | 4253  | 130 | .55  |
| 21000 | .60 | .40 | 7560  | 10080 | 3360  | .5974 | .4026 | 7446  | 10036 | 3382  | 7424  | 10080 | 3360  | 136 | .40  |
| 21000 | .65 | .35 | 8873  | 9555  | 2573  | .6476 | .3524 | 8750  | 9520  | 2590  | 8732  | 9555  | 2573  | 140 | .28  |
| 21000 | .70 | .30 | 10290 | 8820  | 1890  | .6980 | .3020 | 10161 | 8794  | 1903  | 10148 | 8820  | 1890  | 142 | .18  |
| 21000 | .75 | .25 | 11813 | 7875  | 1313  | .7483 | .2517 | 11680 | 7857  | 1321  | 11672 | 7875  | 1313  | 141 | .11  |
| 21000 | .80 | .20 | 13440 | 6720  | 840   | .7987 | .2013 | 13309 | 6709  | 845   | 13304 | 6720  | 840   | 136 | .06  |
| 21000 | .85 | .15 | 15173 | 5355  | 473   | .8491 | .1509 | 15048 | 5349  | 475   | 15045 | 5355  | 473   | 127 | .02  |
| 21000 | .90 | .10 | 17010 | 3780  | 210   | .8995 | .1005 | 16900 | 3778  | 211   | 16899 | 3780  | 210   | 111 | .01  |
| 21000 | .95 | .05 | 18953 | 1995  | 53    | .9498 | .0502 | 18868 | 1995  | 53    | 18868 | 1995  | 53    | 84  | .00  |
| 22000 | .05 | .95 | 55    | 2090  | 19855 | .0494 | .9506 | 54    | 2064  | 19868 | 40    | 2090  | 19855 | 15  | 3.55 |
| 22000 | .10 | .90 | 220   | 3960  | 17820 | .0988 | .9012 | 215   | 3913  | 17843 | 191   | 3960  | 17820 | 29  | 3.16 |
| 22000 | .15 | .85 | 495   | 5610  | 15895 | .1483 | .8517 | 483   | 5548  | 15926 | 452   | 5610  | 15895 | 43  | 2.78 |
| 22000 | .20 | .80 | 880   | 7040  | 14080 | .1979 | .8021 | 860   | 6967  | 14117 | 823   | 7040  | 14080 | 57  | 2.42 |
| 22000 | .25 | .75 | 1375  | 8250  | 12375 | .2476 | .7524 | 1344  | 8171  | 12415 | 1305  | 8250  | 12375 | 70  | 2.07 |
| 22000 | .30 | .70 | 1980  | 9240  | 10780 | .2973 | .7027 | 1938  | 9158  | 10821 | 1897  | 9240  | 10780 | 83  | 1.75 |
| 22000 | .35 | .65 | 2695  | 10010 | 9295  | .3472 | .6528 | 2640  | 9929  | 9335  | 2600  | 10010 | 9295  | 95  | 1.45 |
| 22000 | .40 | .60 | 3520  | 10560 | 7920  | .3971 | .6029 | 3452  | 10483 | 7959  | 3413  | 10560 | 7920  | 107 | 1.18 |
| 22000 | .45 | .55 | 4455  | 10890 | 6655  | .4471 | .5529 | 4374  | 10819 | 6691  | 4338  | 10890 | 6655  | 117 | .94  |
| 22000 | .50 | .50 | 5500  | 11000 | 5500  | .4971 | .5029 | 5406  | 10937 | 5532  | 5374  | 11000 | 5500  | 126 | .73  |
| 22000 | .55 | .45 | 6655  | 10890 | 4455  | .5473 | .4527 | 6549  | 10836 | 4482  | 6521  | 10890 | 4455  | 134 | .55  |
| 22000 | .60 | .40 | 7920  | 10560 | 3520  | .5974 | .4026 | 7803  | 10515 | 3542  | 7780  | 10560 | 3520  | 140 | .40  |
| 22000 | .65 | .35 | 9295  | 10010 | 2695  | .6477 | .3523 | 9169  | 9975  | 2713  | 9151  | 10010 | 2695  | 144 | .28  |
| 22000 | .70 | .30 | 10780 | 9240  | 1980  | .6980 | .3020 | 10648 | 9214  | 1993  | 10635 | 9240  | 1980  | 145 | .18  |
| 22000 | .75 | .25 | 12375 | 8250  | 1375  | .7484 | .2516 | 12240 | 8232  | 1384  | 12231 | 8250  | 1375  | 144 | .11  |
| 22000 | .80 | .20 | 14080 | 7040  | 880   | .7987 | .2013 | 13946 | 7029  | 886   | 13940 | 7040  | 880   | 140 | .06  |
| 22000 | .85 | .15 | 15895 | 5610  | 495   | .8491 | .1509 | 15768 | 5604  | 498   | 15765 | 5610  | 495   | 130 | .02  |
| 22000 | .90 | .10 | 17820 | 3960  | 220   | .8995 | .1005 | 17707 | 3958  | 221   | 17706 | 3960  | 220   | 114 | .01  |
| 22000 | .95 | .05 | 19855 | 2090  | 55    | .9498 | .0502 | 19769 | 2090  | 55    | 19769 | 2090  | 55    | 86  | .00  |
| 23000 | .05 | .95 | 58    | 2185  | 20758 | .0494 | .9506 | 56    | 2158  | 20771 | 43    | 2185  | 20758 | 15  | 3.55 |
| 23000 | .10 | .90 | 230   | 4140  | 18630 | .0988 | .9012 | 224   | 4092  | 18654 | 200   | 4140  | 18630 | 30  | 3.16 |

|       |     |     |       |       |       |       |       |       |       |       |       |       |       |     |      |
|-------|-----|-----|-------|-------|-------|-------|-------|-------|-------|-------|-------|-------|-------|-----|------|
| 23000 | .15 | .85 | 518   | 5865  | 16618 | .1484 | .8516 | 505   | 5801  | 16649 | 473   | 5865  | 16618 | 44  | 2.78 |
| 23000 | .20 | .80 | 920   | 7360  | 14720 | .1980 | .8020 | 899   | 7285  | 14757 | 862   | 7360  | 14720 | 58  | 2.42 |
| 23000 | .25 | .75 | 1438  | 8625  | 12938 | .2476 | .7524 | 1406  | 8544  | 12978 | 1366  | 8625  | 12938 | 72  | 2.07 |
| 23000 | .30 | .70 | 2070  | 9660  | 11270 | .2974 | .7026 | 2027  | 9576  | 11312 | 1985  | 9660  | 11270 | 85  | 1.75 |
| 23000 | .35 | .65 | 2818  | 10465 | 9718  | .3472 | .6528 | 2761  | 10382 | 9759  | 2720  | 10465 | 9718  | 97  | 1.45 |
| 23000 | .40 | .60 | 3680  | 11040 | 8280  | .3971 | .6029 | 3610  | 10961 | 8319  | 3571  | 11040 | 8280  | 109 | 1.18 |
| 23000 | .45 | .55 | 4658  | 11385 | 6958  | .4471 | .5529 | 4574  | 11312 | 6994  | 4538  | 11385 | 6958  | 119 | .94  |
| 23000 | .50 | .50 | 5750  | 11500 | 5750  | .4972 | .5028 | 5654  | 11435 | 5782  | 5621  | 11500 | 5750  | 129 | .73  |
| 23000 | .55 | .45 | 6958  | 11385 | 4658  | .5473 | .4527 | 6849  | 11329 | 4685  | 6821  | 11385 | 4658  | 137 | .55  |
| 23000 | .60 | .40 | 8280  | 11040 | 3680  | .5975 | .4025 | 8160  | 10994 | 3703  | 8137  | 11040 | 3680  | 143 | .40  |
| 23000 | .65 | .35 | 9718  | 10465 | 2818  | .6478 | .3522 | 9589  | 10429 | 2836  | 9571  | 10465 | 2818  | 147 | .28  |
| 23000 | .70 | .30 | 11270 | 9660  | 2070  | .6980 | .3020 | 11135 | 9633  | 2083  | 11121 | 9660  | 2070  | 149 | .18  |
| 23000 | .75 | .25 | 12938 | 8625  | 1438  | .7484 | .2516 | 12799 | 8606  | 1447  | 12790 | 8625  | 1438  | 147 | .11  |
| 23000 | .80 | .20 | 14720 | 7360  | 920   | .7988 | .2012 | 14583 | 7349  | 926   | 14577 | 7360  | 920   | 143 | .06  |
| 23000 | .85 | .15 | 16618 | 5865  | 518   | .8491 | .1509 | 16487 | 5859  | 521   | 16484 | 5865  | 518   | 133 | .02  |
| 23000 | .90 | .10 | 18630 | 4140  | 230   | .8995 | .1005 | 18515 | 4138  | 231   | 18513 | 4140  | 230   | 117 | .01  |
| 23000 | .95 | .05 | 20758 | 2185  | 58    | .9498 | .0502 | 20670 | 2185  | 58    | 20669 | 2185  | 58    | 88  | .00  |
| 24000 | .05 | .95 | 60    | 2280  | 21660 | .0494 | .9506 | 59    | 2253  | 21674 | 45    | 2280  | 21660 | 15  | 3.55 |
| 24000 | .10 | .90 | 240   | 4320  | 19440 | .0989 | .9011 | 234   | 4271  | 19465 | 210   | 4320  | 19440 | 30  | 3.16 |
| 24000 | .15 | .85 | 540   | 6120  | 17340 | .1484 | .8516 | 528   | 6055  | 17373 | 495   | 6120  | 17340 | 45  | 2.78 |
| 24000 | .20 | .80 | 960   | 7680  | 15360 | .1980 | .8020 | 939   | 7604  | 15398 | 900   | 7680  | 15360 | 60  | 2.41 |
| 24000 | .25 | .75 | 1500  | 9000  | 13500 | .2477 | .7523 | 1468  | 8917  | 13541 | 1427  | 9000  | 13500 | 74  | 2.07 |
| 24000 | .30 | .70 | 2160  | 10080 | 11760 | .2975 | .7025 | 2116  | 9995  | 11803 | 2073  | 10080 | 11760 | 87  | 1.75 |
| 24000 | .35 | .65 | 2940  | 10920 | 10140 | .3473 | .6527 | 2883  | 10836 | 10182 | 2840  | 10920 | 10140 | 100 | 1.45 |
| 24000 | .40 | .60 | 3840  | 11520 | 8640  | .3972 | .6028 | 3769  | 11439 | 8680  | 3729  | 11520 | 8640  | 111 | 1.18 |
| 24000 | .45 | .55 | 4860  | 11880 | 7260  | .4472 | .5528 | 4775  | 11806 | 7297  | 4738  | 11880 | 7260  | 122 | .94  |
| 24000 | .50 | .50 | 6000  | 12000 | 6000  | .4972 | .5028 | 5902  | 11934 | 6033  | 5869  | 12000 | 6000  | 131 | .73  |
| 24000 | .55 | .45 | 7260  | 11880 | 4860  | .5474 | .4526 | 7149  | 11823 | 4888  | 7121  | 11880 | 4860  | 139 | .55  |
| 24000 | .60 | .40 | 8640  | 11520 | 3840  | .5976 | .4024 | 8518  | 11473 | 3863  | 8494  | 11520 | 3840  | 146 | .40  |
| 24000 | .65 | .35 | 10140 | 10920 | 2940  | .6478 | .3522 | 10009 | 10883 | 2958  | 9990  | 10920 | 2940  | 150 | .28  |
| 24000 | .70 | .30 | 11760 | 10080 | 2160  | .6981 | .3019 | 11622 | 10053 | 2174  | 11608 | 10080 | 2160  | 152 | .18  |
| 24000 | .75 | .25 | 13500 | 9000  | 1500  | .7484 | .2516 | 13359 | 8981  | 1509  | 13349 | 9000  | 1500  | 151 | .11  |
| 24000 | .80 | .20 | 15360 | 7680  | 960   | .7988 | .2012 | 15220 | 7668  | 966   | 15214 | 7680  | 960   | 146 | .06  |

|       |     |     |       |       |       |       |       |       |       |       |       |       |       |     |      |
|-------|-----|-----|-------|-------|-------|-------|-------|-------|-------|-------|-------|-------|-------|-----|------|
| 24000 | .85 | .15 | 17340 | 6120  | 540   | .8491 | .1509 | 17207 | 6114  | 543   | 17204 | 6120  | 540   | 136 | .02  |
| 24000 | .90 | .10 | 19440 | 4320  | 240   | .8995 | .1005 | 19322 | 4318  | 241   | 19321 | 4320  | 240   | 119 | .01  |
| 24000 | .95 | .05 | 21660 | 2280  | 60    | .9498 | .0502 | 21570 | 2280  | 60    | 21570 | 2280  | 60    | 90  | .00  |
| 25000 | .05 | .95 | 63    | 2375  | 22563 | .0494 | .9506 | 61    | 2347  | 22576 | 47    | 2375  | 22563 | 15  | 3.54 |
| 25000 | .10 | .90 | 250   | 4500  | 20250 | .0989 | .9011 | 244   | 4450  | 20275 | 219   | 4500  | 20250 | 31  | 3.15 |
| 25000 | .15 | .85 | 563   | 6375  | 18063 | .1484 | .8516 | 550   | 6308  | 18096 | 517   | 6375  | 18063 | 46  | 2.78 |
| 25000 | .20 | .80 | 1000  | 8000  | 16000 | .1981 | .8019 | 978   | 7922  | 16039 | 939   | 8000  | 16000 | 61  | 2.41 |
| 25000 | .25 | .75 | 1563  | 9375  | 14063 | .2477 | .7523 | 1530  | 9290  | 14105 | 1487  | 9375  | 14063 | 75  | 2.07 |
| 25000 | .30 | .70 | 2250  | 10500 | 12250 | .2975 | .7025 | 2205  | 10413 | 12294 | 2161  | 10500 | 12250 | 89  | 1.75 |
| 25000 | .35 | .65 | 3063  | 11375 | 10563 | .3473 | .6527 | 3004  | 11289 | 10606 | 2961  | 11375 | 10563 | 102 | 1.45 |
| 25000 | .40 | .60 | 4000  | 12000 | 9000  | .3973 | .6027 | 3927  | 11918 | 9041  | 3886  | 12000 | 9000  | 114 | 1.18 |
| 25000 | .45 | .55 | 5063  | 12375 | 7563  | .4472 | .5528 | 4976  | 12299 | 7600  | 4938  | 12375 | 7563  | 125 | .94  |
| 25000 | .50 | .50 | 6250  | 12500 | 6250  | .4973 | .5027 | 6150  | 12433 | 6284  | 6116  | 12500 | 6250  | 134 | .73  |
| 25000 | .55 | .45 | 7563  | 12375 | 5063  | .5474 | .4526 | 7449  | 12317 | 5091  | 7420  | 12375 | 5063  | 142 | .55  |
| 25000 | .60 | .40 | 9000  | 12000 | 4000  | .5976 | .4024 | 8875  | 11952 | 4024  | 8851  | 12000 | 4000  | 149 | .40  |
| 25000 | .65 | .35 | 10563 | 11375 | 3063  | .6478 | .3522 | 10428 | 11337 | 3081  | 10409 | 11375 | 3063  | 153 | .28  |
| 25000 | .70 | .30 | 12250 | 10500 | 2250  | .6981 | .3019 | 12109 | 10472 | 2264  | 12095 | 10500 | 2250  | 155 | .18  |
| 25000 | .75 | .25 | 14063 | 9375  | 1563  | .7485 | .2515 | 13918 | 9356  | 1572  | 13909 | 9375  | 1563  | 154 | .11  |
| 25000 | .80 | .20 | 16000 | 8000  | 1000  | .7988 | .2012 | 15857 | 7988  | 1006  | 15851 | 8000  | 1000  | 149 | .06  |
| 25000 | .85 | .15 | 18063 | 6375  | 563   | .8492 | .1508 | 17927 | 6369  | 566   | 17924 | 6375  | 563   | 139 | .02  |
| 25000 | .90 | .10 | 20250 | 4500  | 250   | .8995 | .1005 | 20130 | 4498  | 251   | 20128 | 4500  | 250   | 122 | .01  |
| 25000 | .95 | .05 | 22563 | 2375  | 63    | .9498 | .0502 | 22471 | 2375  | 63    | 22471 | 2375  | 63    | 92  | .00  |
| 26000 | .05 | .95 | 65    | 2470  | 23465 | .0494 | .9506 | 63    | 2441  | 23479 | 49    | 2470  | 23465 | 16  | 3.54 |
| 26000 | .10 | .90 | 260   | 4680  | 21060 | .0989 | .9011 | 254   | 4629  | 21086 | 229   | 4680  | 21060 | 31  | 3.15 |
| 26000 | .15 | .85 | 585   | 6630  | 18785 | .1485 | .8515 | 572   | 6562  | 18819 | 538   | 6630  | 18785 | 47  | 2.77 |
| 26000 | .20 | .80 | 1040  | 8320  | 16640 | .1981 | .8019 | 1018  | 8241  | 16680 | 978   | 8320  | 16640 | 62  | 2.41 |
| 26000 | .25 | .75 | 1625  | 9750  | 14625 | .2478 | .7522 | 1592  | 9664  | 14668 | 1548  | 9750  | 14625 | 77  | 2.07 |
| 26000 | .30 | .70 | 2340  | 10920 | 12740 | .2976 | .7024 | 2294  | 10831 | 12784 | 2250  | 10920 | 12740 | 90  | 1.75 |
| 26000 | .35 | .65 | 3185  | 11830 | 10985 | .3474 | .6526 | 3125  | 11742 | 11029 | 3081  | 11830 | 10985 | 104 | 1.45 |
| 26000 | .40 | .60 | 4160  | 12480 | 9360  | .3973 | .6027 | 4086  | 12396 | 9402  | 4044  | 12480 | 9360  | 116 | 1.18 |
| 26000 | .45 | .55 | 5265  | 12870 | 7865  | .4473 | .5527 | 5177  | 12793 | 7904  | 5138  | 12870 | 7865  | 127 | .94  |
| 26000 | .50 | .50 | 6500  | 13000 | 6500  | .4974 | .5026 | 6398  | 12931 | 6534  | 6363  | 13000 | 6500  | 137 | .73  |
| 26000 | .55 | .45 | 7865  | 12870 | 5265  | .5475 | .4525 | 7749  | 12811 | 5295  | 7720  | 12870 | 5265  | 145 | .55  |

|       |     |     |       |       |       |       |       |       |       |       |       |       |       |     |      |
|-------|-----|-----|-------|-------|-------|-------|-------|-------|-------|-------|-------|-------|-------|-----|------|
| 26000 | .60 | .40 | 9360  | 12480 | 4160  | .5977 | .4023 | 9233  | 12431 | 4184  | 9208  | 12480 | 4160  | 152 | .40  |
| 26000 | .65 | .35 | 10985 | 11830 | 3185  | .6479 | .3521 | 10848 | 11792 | 3204  | 10829 | 11830 | 3185  | 156 | .28  |
| 26000 | .70 | .30 | 12740 | 10920 | 2340  | .6982 | .3018 | 12596 | 10891 | 2354  | 12582 | 10920 | 2340  | 158 | .18  |
| 26000 | .75 | .25 | 14625 | 9750  | 1625  | .7485 | .2515 | 14478 | 9730  | 1635  | 14468 | 9750  | 1625  | 157 | .11  |
| 26000 | .80 | .20 | 16640 | 8320  | 1040  | .7988 | .2012 | 16494 | 8308  | 1046  | 16488 | 8320  | 1040  | 152 | .06  |
| 26000 | .85 | .15 | 18785 | 6630  | 585   | .8492 | .1508 | 18647 | 6624  | 588   | 18643 | 6630  | 585   | 142 | .02  |
| 26000 | .90 | .10 | 21060 | 4680  | 260   | .8995 | .1005 | 20937 | 4678  | 261   | 20936 | 4680  | 260   | 124 | .01  |
| 26000 | .95 | .05 | 23465 | 2470  | 65    | .9498 | .0502 | 23371 | 2470  | 65    | 23371 | 2470  | 65    | 94  | .00  |
| 27000 | .05 | .95 | 68    | 2565  | 24368 | .0494 | .9506 | 66    | 2536  | 24382 | 51    | 2565  | 24368 | 16  | 3.54 |
| 27000 | .10 | .90 | 270   | 4860  | 21870 | .0989 | .9011 | 264   | 4808  | 21896 | 238   | 4860  | 21870 | 32  | 3.15 |
| 27000 | .15 | .85 | 608   | 6885  | 19508 | .1485 | .8515 | 594   | 6816  | 19542 | 560   | 6885  | 19508 | 48  | 2.77 |
| 27000 | .20 | .80 | 1080  | 8640  | 17280 | .1981 | .8019 | 1057  | 8559  | 17320 | 1017  | 8640  | 17280 | 63  | 2.41 |
| 27000 | .25 | .75 | 1688  | 10125 | 15188 | .2478 | .7522 | 1654  | 10037 | 15231 | 1610  | 10125 | 15188 | 78  | 2.07 |
| 27000 | .30 | .70 | 2430  | 11340 | 13230 | .2976 | .7024 | 2383  | 11249 | 13275 | 2338  | 11340 | 13230 | 92  | 1.75 |
| 27000 | .35 | .65 | 3308  | 12285 | 11408 | .3474 | .6526 | 3247  | 12195 | 11452 | 3202  | 12285 | 11408 | 106 | 1.45 |
| 27000 | .40 | .60 | 4320  | 12960 | 9720  | .3974 | .6026 | 4245  | 12875 | 9763  | 4202  | 12960 | 9720  | 118 | 1.18 |
| 27000 | .45 | .55 | 5468  | 13365 | 8168  | .4474 | .5526 | 5377  | 13286 | 8207  | 5338  | 13365 | 8168  | 129 | .94  |
| 27000 | .50 | .50 | 6750  | 13500 | 6750  | .4974 | .5026 | 6646  | 13430 | 6785  | 6611  | 13500 | 6750  | 139 | .73  |
| 27000 | .55 | .45 | 8168  | 13365 | 5468  | .5475 | .4525 | 8050  | 13305 | 5498  | 8020  | 13365 | 5468  | 148 | .55  |
| 27000 | .60 | .40 | 9720  | 12960 | 4320  | .5977 | .4023 | 9590  | 12910 | 4345  | 9565  | 12960 | 4320  | 155 | .40  |
| 27000 | .65 | .35 | 11408 | 12285 | 3308  | .6479 | .3521 | 11268 | 12246 | 3327  | 11248 | 12285 | 3308  | 159 | .28  |
| 27000 | .70 | .30 | 13230 | 11340 | 2430  | .6982 | .3018 | 13084 | 11311 | 2445  | 13069 | 11340 | 2430  | 161 | .18  |
| 27000 | .75 | .25 | 15188 | 10125 | 1688  | .7485 | .2515 | 15038 | 10105 | 1698  | 15028 | 10125 | 1688  | 160 | .11  |
| 27000 | .80 | .20 | 17280 | 8640  | 1080  | .7988 | .2012 | 17132 | 8628  | 1086  | 17125 | 8640  | 1080  | 155 | .06  |
| 27000 | .85 | .15 | 19508 | 6885  | 608   | .8492 | .1508 | 19367 | 6878  | 611   | 19363 | 6885  | 608   | 144 | .02  |
| 27000 | .90 | .10 | 21870 | 4860  | 270   | .8995 | .1005 | 21745 | 4857  | 271   | 21744 | 4860  | 270   | 126 | .01  |
| 27000 | .95 | .05 | 24368 | 2565  | 68    | .9498 | .0502 | 24272 | 2565  | 68    | 24272 | 2565  | 68    | 96  | .00  |
| 28000 | .05 | .95 | 70    | 2660  | 25270 | .0494 | .9506 | 68    | 2630  | 25285 | 54    | 2660  | 25270 | 16  | 3.54 |
| 28000 | .10 | .90 | 280   | 5040  | 22680 | .0989 | .9011 | 274   | 4987  | 22706 | 247   | 5040  | 22680 | 33  | 3.15 |
| 28000 | .15 | .85 | 630   | 7140  | 20230 | .1485 | .8515 | 617   | 7070  | 20265 | 581   | 7140  | 20230 | 49  | 2.77 |
| 28000 | .20 | .80 | 1120  | 8960  | 17920 | .1982 | .8018 | 1097  | 8878  | 17961 | 1056  | 8960  | 17920 | 64  | 2.41 |
| 28000 | .25 | .75 | 1750  | 10500 | 15750 | .2479 | .7521 | 1715  | 10410 | 15795 | 1671  | 10500 | 15750 | 79  | 2.07 |
| 28000 | .30 | .70 | 2520  | 11760 | 13720 | .2976 | .7024 | 2472  | 11668 | 13766 | 2426  | 11760 | 13720 | 94  | 1.75 |



|       |     |     |       |       |       |       |       |       |       |       |       |       |       |     |      |
|-------|-----|-----|-------|-------|-------|-------|-------|-------|-------|-------|-------|-------|-------|-----|------|
| 28000 | .35 | .65 | 3430  | 12740 | 11830 | .3475 | .6525 | 3368  | 12649 | 11876 | 3322  | 12740 | 11830 | 108 | 1.45 |
| 28000 | .40 | .60 | 4480  | 13440 | 10080 | .3974 | .6026 | 4403  | 13353 | 10123 | 4360  | 13440 | 10080 | 120 | 1.18 |
| 28000 | .45 | .55 | 5670  | 13860 | 8470  | .4474 | .5526 | 5578  | 13780 | 8510  | 5538  | 13860 | 8470  | 132 | .94  |
| 28000 | .50 | .50 | 7000  | 14000 | 7000  | .4975 | .5025 | 6894  | 13929 | 7036  | 6858  | 14000 | 7000  | 142 | .73  |
| 28000 | .55 | .45 | 8470  | 13860 | 5670  | .5476 | .4524 | 8350  | 13799 | 5701  | 8319  | 13860 | 5670  | 151 | .55  |
| 28000 | .60 | .40 | 10080 | 13440 | 4480  | .5977 | .4023 | 9948  | 13389 | 4505  | 9923  | 13440 | 4480  | 157 | .40  |
| 28000 | .65 | .35 | 11830 | 12740 | 3430  | .6480 | .3520 | 11688 | 12700 | 3450  | 11668 | 12740 | 3430  | 162 | .28  |
| 28000 | .70 | .30 | 13720 | 11760 | 2520  | .6982 | .3018 | 13571 | 11730 | 2535  | 13556 | 11760 | 2520  | 164 | .18  |
| 28000 | .75 | .25 | 15750 | 10500 | 1750  | .7485 | .2515 | 15598 | 10480 | 1760  | 15587 | 10500 | 1750  | 163 | .11  |
| 28000 | .80 | .20 | 17920 | 8960  | 1120  | .7989 | .2011 | 17769 | 8947  | 1126  | 17763 | 8960  | 1120  | 157 | .06  |
| 28000 | .85 | .15 | 20230 | 7140  | 630   | .8492 | .1508 | 20086 | 7133  | 633   | 20083 | 7140  | 630   | 147 | .02  |
| 28000 | .90 | .10 | 22680 | 5040  | 280   | .8995 | .1005 | 22553 | 5037  | 281   | 22551 | 5040  | 280   | 129 | .01  |
| 28000 | .95 | .05 | 25270 | 2660  | 70    | .9498 | .0502 | 25173 | 2660  | 70    | 25173 | 2660  | 70    | 97  | .00  |
| 29000 | .05 | .95 | 73    | 2755  | 26173 | .0495 | .9505 | 71    | 2725  | 26188 | 56    | 2755  | 26173 | 17  | 3.54 |
| 29000 | .10 | .90 | 290   | 5220  | 23490 | .0990 | .9010 | 284   | 5166  | 23517 | 257   | 5220  | 23490 | 33  | 3.15 |
| 29000 | .15 | .85 | 653   | 7395  | 20953 | .1485 | .8515 | 639   | 7323  | 20988 | 603   | 7395  | 20953 | 49  | 2.77 |
| 29000 | .20 | .80 | 1160  | 9280  | 18560 | .1982 | .8018 | 1137  | 9196  | 18602 | 1095  | 9280  | 18560 | 65  | 2.41 |
| 29000 | .25 | .75 | 1813  | 10875 | 16313 | .2479 | .7521 | 1777  | 10784 | 16358 | 1732  | 10875 | 16313 | 81  | 2.07 |
| 29000 | .30 | .70 | 2610  | 12180 | 14210 | .2977 | .7023 | 2561  | 12086 | 14257 | 2514  | 12180 | 14210 | 96  | 1.75 |
| 29000 | .35 | .65 | 3553  | 13195 | 12253 | .3475 | .6525 | 3489  | 13102 | 12299 | 3443  | 13195 | 12253 | 109 | 1.45 |
| 29000 | .40 | .60 | 4640  | 13920 | 10440 | .3975 | .6025 | 4562  | 13832 | 10484 | 4518  | 13920 | 10440 | 122 | 1.18 |
| 29000 | .45 | .55 | 5873  | 14355 | 8773  | .4474 | .5526 | 5779  | 14273 | 8813  | 5738  | 14355 | 8773  | 134 | .94  |
| 29000 | .50 | .50 | 7250  | 14500 | 7250  | .4975 | .5025 | 7142  | 14427 | 7286  | 7105  | 14500 | 7250  | 145 | .73  |
| 29000 | .55 | .45 | 8773  | 14355 | 5873  | .5476 | .4524 | 8650  | 14293 | 5904  | 8619  | 14355 | 5873  | 153 | .55  |
| 29000 | .60 | .40 | 10440 | 13920 | 4640  | .5978 | .4022 | 10306 | 13868 | 4666  | 10280 | 13920 | 4640  | 160 | .40  |
| 29000 | .65 | .35 | 12253 | 13195 | 3553  | .6480 | .3520 | 12108 | 13154 | 3573  | 12088 | 13195 | 3553  | 165 | .28  |
| 29000 | .70 | .30 | 14210 | 12180 | 2610  | .6983 | .3017 | 14058 | 12150 | 2625  | 14043 | 12180 | 2610  | 167 | .18  |
| 29000 | .75 | .25 | 16313 | 10875 | 1813  | .7486 | .2514 | 16157 | 10854 | 1823  | 16147 | 10875 | 1813  | 166 | .11  |
| 29000 | .80 | .20 | 18560 | 9280  | 1160  | .7989 | .2011 | 18406 | 9267  | 1166  | 18400 | 9280  | 1160  | 160 | .06  |
| 29000 | .85 | .15 | 20953 | 7395  | 653   | .8492 | .1508 | 20806 | 7388  | 656   | 20803 | 7395  | 653   | 149 | .02  |
| 29000 | .90 | .10 | 23490 | 5220  | 290   | .8995 | .1005 | 23360 | 5217  | 291   | 23359 | 5220  | 290   | 131 | .01  |
| 29000 | .95 | .05 | 26173 | 2755  | 73    | .9498 | .0502 | 26074 | 2755  | 73    | 26073 | 2755  | 73    | 99  | .00  |
| 30000 | .05 | .95 | 75    | 2850  | 27075 | .0495 | .9505 | 73    | 2819  | 27090 | 58    | 2850  | 27075 | 17  | 3.54 |

|       |     |     |       |       |       |       |       |       |       |       |       |       |       |     |      |
|-------|-----|-----|-------|-------|-------|-------|-------|-------|-------|-------|-------|-------|-------|-----|------|
| 30000 | .10 | .90 | 300   | 5400  | 24300 | .0990 | .9010 | 294   | 5345  | 24327 | 266   | 5400  | 24300 | 34  | 3.15 |
| 30000 | .15 | .85 | 675   | 7650  | 21675 | .1486 | .8514 | 661   | 7577  | 21711 | 625   | 7650  | 21675 | 50  | 2.77 |
| 30000 | .20 | .80 | 1200  | 9600  | 19200 | .1982 | .8018 | 1176  | 9515  | 19243 | 1133  | 9600  | 19200 | 67  | 2.41 |
| 30000 | .25 | .75 | 1875  | 11250 | 16875 | .2479 | .7521 | 1839  | 11157 | 16921 | 1793  | 11250 | 16875 | 82  | 2.07 |
| 30000 | .30 | .70 | 2700  | 12600 | 14700 | .2977 | .7023 | 2651  | 12504 | 14748 | 2603  | 12600 | 14700 | 97  | 1.74 |
| 30000 | .35 | .65 | 3675  | 13650 | 12675 | .3476 | .6524 | 3611  | 13556 | 12722 | 3564  | 13650 | 12675 | 111 | 1.45 |
| 30000 | .40 | .60 | 4800  | 14400 | 10800 | .3975 | .6025 | 4721  | 14310 | 10845 | 4676  | 14400 | 10800 | 124 | 1.18 |
| 30000 | .45 | .55 | 6075  | 14850 | 9075  | .4475 | .5525 | 5980  | 14767 | 9116  | 5939  | 14850 | 9075  | 136 | .94  |
| 30000 | .50 | .50 | 7500  | 15000 | 7500  | .4975 | .5025 | 7390  | 14926 | 7537  | 7353  | 15000 | 7500  | 147 | .73  |
| 30000 | .55 | .45 | 9075  | 14850 | 6075  | .5476 | .4524 | 8951  | 14787 | 6107  | 8919  | 14850 | 6075  | 156 | .55  |
| 30000 | .60 | .40 | 10800 | 14400 | 4800  | .5978 | .4022 | 10663 | 14348 | 4826  | 10637 | 14400 | 4800  | 163 | .40  |
| 30000 | .65 | .35 | 12675 | 13650 | 3675  | .6480 | .3520 | 12528 | 13609 | 3696  | 12507 | 13650 | 3675  | 168 | .27  |
| 30000 | .70 | .30 | 14700 | 12600 | 2700  | .6983 | .3017 | 14546 | 12569 | 2715  | 14530 | 12600 | 2700  | 170 | .18  |
| 30000 | .75 | .25 | 16875 | 11250 | 1875  | .7486 | .2514 | 16717 | 11229 | 1886  | 16707 | 11250 | 1875  | 168 | .11  |
| 30000 | .80 | .20 | 19200 | 9600  | 1200  | .7989 | .2011 | 19044 | 9587  | 1207  | 19037 | 9600  | 1200  | 163 | .06  |
| 30000 | .85 | .15 | 21675 | 7650  | 675   | .8492 | .1508 | 21526 | 7643  | 678   | 21523 | 7650  | 675   | 152 | .02  |
| 30000 | .90 | .10 | 24300 | 5400  | 300   | .8996 | .1004 | 24168 | 5397  | 301   | 24167 | 5400  | 300   | 133 | .01  |
| 30000 | .95 | .05 | 27075 | 2850  | 75    | .9498 | .0502 | 26975 | 2849  | 75    | 26974 | 2850  | 75    | 101 | .00  |
| 31000 | .05 | .95 | 78    | 2945  | 27978 | .0495 | .9505 | 76    | 2914  | 27993 | 60    | 2945  | 27978 | 17  | 3.53 |
| 31000 | .10 | .90 | 310   | 5580  | 25110 | .0990 | .9010 | 304   | 5524  | 25138 | 276   | 5580  | 25110 | 34  | 3.15 |
| 31000 | .15 | .85 | 698   | 7905  | 22398 | .1486 | .8514 | 683   | 7831  | 22435 | 646   | 7905  | 22398 | 51  | 2.77 |
| 31000 | .20 | .80 | 1240  | 9920  | 19840 | .1983 | .8017 | 1216  | 9833  | 19883 | 1172  | 9920  | 19840 | 68  | 2.41 |
| 31000 | .25 | .75 | 1938  | 11625 | 17438 | .2480 | .7520 | 1901  | 11531 | 17485 | 1854  | 11625 | 17438 | 84  | 2.06 |
| 31000 | .30 | .70 | 2790  | 13020 | 15190 | .2978 | .7022 | 2740  | 12923 | 15239 | 2691  | 13020 | 15190 | 99  | 1.74 |
| 31000 | .35 | .65 | 3798  | 14105 | 13098 | .3476 | .6524 | 3732  | 14009 | 13145 | 3684  | 14105 | 13098 | 113 | 1.45 |
| 31000 | .40 | .60 | 4960  | 14880 | 11160 | .3975 | .6025 | 4879  | 14789 | 11206 | 4833  | 14880 | 11160 | 127 | 1.18 |
| 31000 | .45 | .55 | 6278  | 15345 | 9378  | .4475 | .5525 | 6181  | 15261 | 9420  | 6139  | 15345 | 9378  | 139 | .94  |
| 31000 | .50 | .50 | 7750  | 15500 | 7750  | .4976 | .5024 | 7638  | 15425 | 7788  | 7601  | 15500 | 7750  | 149 | .73  |
| 31000 | .55 | .45 | 9378  | 15345 | 6278  | .5477 | .4523 | 9251  | 15280 | 6310  | 9219  | 15345 | 6278  | 159 | .55  |
| 31000 | .60 | .40 | 11160 | 14880 | 4960  | .5979 | .4021 | 11021 | 14827 | 4987  | 10994 | 14880 | 4960  | 166 | .40  |
| 31000 | .65 | .35 | 13098 | 14105 | 3798  | .6481 | .3519 | 12948 | 14063 | 3818  | 12927 | 14105 | 3798  | 170 | .27  |
| 31000 | .70 | .30 | 15190 | 13020 | 2790  | .6983 | .3017 | 15033 | 12989 | 2806  | 15017 | 13020 | 2790  | 173 | .18  |
| 31000 | .75 | .25 | 17438 | 11625 | 1938  | .7486 | .2514 | 17277 | 11603 | 1948  | 17266 | 11625 | 1938  | 171 | .11  |

|       |     |     |       |       |       |       |       |       |       |       |       |       |       |     |      |
|-------|-----|-----|-------|-------|-------|-------|-------|-------|-------|-------|-------|-------|-------|-----|------|
| 31000 | .80 | .20 | 19840 | 9920  | 1240  | .7989 | .2011 | 19681 | 9907  | 1247  | 19674 | 9920  | 1240  | 166 | .06  |
| 31000 | .85 | .15 | 22398 | 7905  | 698   | .8492 | .1508 | 22246 | 7898  | 701   | 22243 | 7905  | 698   | 155 | .02  |
| 31000 | .90 | .10 | 25110 | 5580  | 310   | .8996 | .1004 | 24976 | 5577  | 311   | 24975 | 5580  | 310   | 135 | .01  |
| 31000 | .95 | .05 | 27978 | 2945  | 78    | .9498 | .0502 | 27875 | 2944  | 78    | 27875 | 2945  | 78    | 102 | .00  |
| 32000 | .05 | .95 | 80    | 3040  | 28880 | .0495 | .9505 | 78    | 3008  | 28896 | 62    | 3040  | 28880 | 18  | 3.53 |
| 32000 | .10 | .90 | 320   | 5760  | 25920 | .0990 | .9010 | 313   | 5703  | 25948 | 285   | 5760  | 25920 | 35  | 3.15 |
| 32000 | .15 | .85 | 720   | 8160  | 23120 | .1486 | .8514 | 706   | 8085  | 23158 | 668   | 8160  | 23120 | 52  | 2.77 |
| 32000 | .20 | .80 | 1280  | 10240 | 20480 | .1983 | .8017 | 1255  | 10152 | 20524 | 1211  | 10240 | 20480 | 69  | 2.41 |
| 32000 | .25 | .75 | 2000  | 12000 | 18000 | .2480 | .7520 | 1963  | 11904 | 18048 | 1915  | 12000 | 18000 | 85  | 2.06 |
| 32000 | .30 | .70 | 2880  | 13440 | 15680 | .2978 | .7022 | 2829  | 13341 | 15729 | 2780  | 13440 | 15680 | 100 | 1.74 |
| 32000 | .35 | .65 | 3920  | 14560 | 13520 | .3477 | .6523 | 3854  | 14463 | 13569 | 3805  | 14560 | 13520 | 115 | 1.45 |
| 32000 | .40 | .60 | 5120  | 15360 | 11520 | .3976 | .6024 | 5038  | 15267 | 11566 | 4991  | 15360 | 11520 | 129 | 1.18 |
| 32000 | .45 | .55 | 6480  | 15840 | 9680  | .4476 | .5524 | 6382  | 15754 | 9723  | 6339  | 15840 | 9680  | 141 | .94  |
| 32000 | .50 | .50 | 8000  | 16000 | 8000  | .4976 | .5024 | 7886  | 15924 | 8038  | 7848  | 16000 | 8000  | 152 | .73  |
| 32000 | .55 | .45 | 9680  | 15840 | 6480  | .5477 | .4523 | 9552  | 15774 | 6513  | 9519  | 15840 | 6480  | 161 | .55  |
| 32000 | .60 | .40 | 11520 | 15360 | 5120  | .5979 | .4021 | 11379 | 15306 | 5147  | 11352 | 15360 | 5120  | 168 | .40  |
| 32000 | .65 | .35 | 13520 | 14560 | 3920  | .6481 | .3519 | 13368 | 14517 | 3941  | 13347 | 14560 | 3920  | 173 | .27  |
| 32000 | .70 | .30 | 15680 | 13440 | 2880  | .6983 | .3017 | 15521 | 13408 | 2896  | 15505 | 13440 | 2880  | 175 | .18  |
| 32000 | .75 | .25 | 18000 | 12000 | 2000  | .7486 | .2514 | 17837 | 11978 | 2011  | 17826 | 12000 | 2000  | 174 | .11  |
| 32000 | .80 | .20 | 20480 | 10240 | 1280  | .7989 | .2011 | 20318 | 10226 | 1287  | 20312 | 10240 | 1280  | 168 | .06  |
| 32000 | .85 | .15 | 23120 | 8160  | 720   | .8493 | .1507 | 22967 | 8153  | 724   | 22963 | 8160  | 720   | 157 | .02  |
| 32000 | .90 | .10 | 25920 | 5760  | 320   | .8996 | .1004 | 25784 | 5757  | 321   | 25782 | 5760  | 320   | 138 | .01  |
| 32000 | .95 | .05 | 28880 | 3040  | 80    | .9498 | .0502 | 28776 | 3039  | 80    | 28776 | 3040  | 80    | 104 | .00  |
| 33000 | .05 | .95 | 83    | 3135  | 29783 | .0495 | .9505 | 81    | 3103  | 29799 | 65    | 3135  | 29783 | 18  | 3.53 |
| 33000 | .10 | .90 | 330   | 5940  | 26730 | .0990 | .9010 | 323   | 5883  | 26759 | 295   | 5940  | 26730 | 35  | 3.14 |
| 33000 | .15 | .85 | 743   | 8415  | 23843 | .1486 | .8514 | 728   | 8339  | 23881 | 690   | 8415  | 23843 | 53  | 2.77 |
| 33000 | .20 | .80 | 1320  | 10560 | 21120 | .1983 | .8017 | 1295  | 10471 | 21165 | 1250  | 10560 | 21120 | 70  | 2.41 |
| 33000 | .25 | .75 | 2063  | 12375 | 18563 | .2480 | .7520 | 2025  | 12278 | 18611 | 1976  | 12375 | 18563 | 86  | 2.06 |
| 33000 | .30 | .70 | 2970  | 13860 | 16170 | .2978 | .7022 | 2918  | 13760 | 16220 | 2868  | 13860 | 16170 | 102 | 1.74 |
| 33000 | .35 | .65 | 4043  | 15015 | 13943 | .3477 | .6523 | 3975  | 14916 | 13992 | 3926  | 15015 | 13943 | 117 | 1.45 |
| 33000 | .40 | .60 | 5280  | 15840 | 11880 | .3976 | .6024 | 5197  | 15746 | 11927 | 5149  | 15840 | 11880 | 131 | 1.18 |
| 33000 | .45 | .55 | 6683  | 16335 | 9983  | .4476 | .5524 | 6583  | 16248 | 10026 | 6539  | 16335 | 9983  | 143 | .94  |
| 33000 | .50 | .50 | 8250  | 16500 | 8250  | .4977 | .5023 | 8135  | 16423 | 8289  | 8096  | 16500 | 8250  | 154 | .73  |

|       |     |     |       |       |       |       |       |       |       |       |       |       |       |     |      |
|-------|-----|-----|-------|-------|-------|-------|-------|-------|-------|-------|-------|-------|-------|-----|------|
| 33000 | .55 | .45 | 9983  | 16335 | 6683  | .5478 | .4522 | 9852  | 16268 | 6716  | 9819  | 16335 | 6683  | 164 | .55  |
| 33000 | .60 | .40 | 11880 | 15840 | 5280  | .5979 | .4021 | 11737 | 15785 | 5307  | 11709 | 15840 | 5280  | 171 | .40  |
| 33000 | .65 | .35 | 13943 | 15015 | 4043  | .6481 | .3519 | 13788 | 14972 | 4064  | 13767 | 15015 | 4043  | 176 | .27  |
| 33000 | .70 | .30 | 16170 | 13860 | 2970  | .6984 | .3016 | 16008 | 13828 | 2986  | 15992 | 13860 | 2970  | 178 | .18  |
| 33000 | .75 | .25 | 18563 | 12375 | 2063  | .7487 | .2513 | 18397 | 12353 | 2074  | 18386 | 12375 | 2063  | 177 | .11  |
| 33000 | .80 | .20 | 21120 | 10560 | 1320  | .7990 | .2010 | 20956 | 10546 | 1327  | 20949 | 10560 | 1320  | 171 | .06  |
| 33000 | .85 | .15 | 23843 | 8415  | 743   | .8493 | .1507 | 23687 | 8408  | 746   | 23683 | 8415  | 743   | 159 | .02  |
| 33000 | .90 | .10 | 26730 | 5940  | 330   | .8996 | .1004 | 26592 | 5937  | 331   | 26590 | 5940  | 330   | 140 | .01  |
| 33000 | .95 | .05 | 29783 | 3135  | 83    | .9498 | .0502 | 29677 | 3134  | 83    | 29677 | 3135  | 83    | 106 | .00  |
| 34000 | .05 | .95 | 85    | 3230  | 30685 | .0495 | .9505 | 83    | 3197  | 30701 | 67    | 3230  | 30685 | 18  | 3.53 |
| 34000 | .10 | .90 | 340   | 6120  | 27540 | .0990 | .9010 | 333   | 6062  | 27569 | 304   | 6120  | 27540 | 36  | 3.14 |
| 34000 | .15 | .85 | 765   | 8670  | 24565 | .1487 | .8513 | 750   | 8592  | 24604 | 711   | 8670  | 24565 | 54  | 2.77 |
| 34000 | .20 | .80 | 1360  | 10880 | 21760 | .1983 | .8017 | 1335  | 10789 | 21805 | 1289  | 10880 | 21760 | 71  | 2.41 |
| 34000 | .25 | .75 | 2125  | 12750 | 19125 | .2481 | .7519 | 2087  | 12651 | 19174 | 2038  | 12750 | 19125 | 87  | 2.06 |
| 34000 | .30 | .70 | 3060  | 14280 | 16660 | .2979 | .7021 | 3007  | 14178 | 16711 | 2957  | 14280 | 16660 | 103 | 1.74 |
| 34000 | .35 | .65 | 4165  | 15470 | 14365 | .3477 | .6523 | 4097  | 15370 | 14415 | 4047  | 15470 | 14365 | 118 | 1.45 |
| 34000 | .40 | .60 | 5440  | 16320 | 12240 | .3977 | .6023 | 5355  | 16224 | 12288 | 5308  | 16320 | 12240 | 132 | 1.18 |
| 34000 | .45 | .55 | 6885  | 16830 | 10285 | .4476 | .5524 | 6784  | 16742 | 10329 | 6740  | 16830 | 10285 | 145 | .94  |
| 34000 | .50 | .50 | 8500  | 17000 | 8500  | .4977 | .5023 | 8383  | 16921 | 8539  | 8344  | 17000 | 8500  | 156 | .73  |
| 34000 | .55 | .45 | 10285 | 16830 | 6885  | .5478 | .4522 | 10153 | 16762 | 6919  | 10119 | 16830 | 6885  | 166 | .55  |
| 34000 | .60 | .40 | 12240 | 16320 | 5440  | .5979 | .4021 | 12094 | 16264 | 5468  | 12067 | 16320 | 5440  | 173 | .40  |
| 34000 | .65 | .35 | 14365 | 15470 | 4165  | .6482 | .3518 | 14208 | 15426 | 4187  | 14186 | 15470 | 4165  | 179 | .27  |
| 34000 | .70 | .30 | 16660 | 14280 | 3060  | .6984 | .3016 | 16496 | 14247 | 3076  | 16479 | 14280 | 3060  | 181 | .18  |
| 34000 | .75 | .25 | 19125 | 12750 | 2125  | .7487 | .2513 | 18957 | 12727 | 2136  | 18946 | 12750 | 2125  | 179 | .11  |
| 34000 | .80 | .20 | 21760 | 10880 | 1360  | .7990 | .2010 | 21593 | 10866 | 1367  | 21587 | 10880 | 1360  | 173 | .06  |
| 34000 | .85 | .15 | 24565 | 8670  | 765   | .8493 | .1507 | 24407 | 8663  | 769   | 24403 | 8670  | 765   | 162 | .02  |
| 34000 | .90 | .10 | 27540 | 6120  | 340   | .8996 | .1004 | 27400 | 6117  | 341   | 27398 | 6120  | 340   | 142 | .01  |
| 34000 | .95 | .05 | 30685 | 3230  | 85    | .9498 | .0502 | 30578 | 3229  | 85    | 30578 | 3230  | 85    | 107 | .00  |
| 35000 | .05 | .95 | 88    | 3325  | 31588 | .0495 | .9505 | 86    | 3292  | 31604 | 69    | 3325  | 31588 | 18  | 3.53 |
| 35000 | .10 | .90 | 350   | 6300  | 28350 | .0991 | .9009 | 343   | 6241  | 28380 | 314   | 6300  | 28350 | 36  | 3.14 |
| 35000 | .15 | .85 | 788   | 8925  | 25288 | .1487 | .8513 | 772   | 8846  | 25327 | 733   | 8925  | 25288 | 54  | 2.77 |
| 35000 | .20 | .80 | 1400  | 11200 | 22400 | .1984 | .8016 | 1374  | 11108 | 22446 | 1328  | 11200 | 22400 | 72  | 2.40 |
| 35000 | .25 | .75 | 2188  | 13125 | 19688 | .2481 | .7519 | 2149  | 13025 | 19738 | 2099  | 13125 | 19688 | 89  | 2.06 |

|       |     |     |       |       |       |       |       |       |       |       |       |       |       |     |      |
|-------|-----|-----|-------|-------|-------|-------|-------|-------|-------|-------|-------|-------|-------|-----|------|
| 35000 | .30 | .70 | 3150  | 14700 | 17150 | .2979 | .7021 | 3097  | 14597 | 17202 | 3045  | 14700 | 17150 | 105 | 1.74 |
| 35000 | .35 | .65 | 4288  | 15925 | 14788 | .3478 | .6522 | 4218  | 15823 | 14838 | 4167  | 15925 | 14788 | 120 | 1.45 |
| 35000 | .40 | .60 | 5600  | 16800 | 12600 | .3977 | .6023 | 5514  | 16703 | 12649 | 5466  | 16800 | 12600 | 134 | 1.18 |
| 35000 | .45 | .55 | 7088  | 17325 | 10588 | .4477 | .5523 | 6985  | 17235 | 10632 | 6940  | 17325 | 10588 | 147 | .94  |
| 35000 | .50 | .50 | 8750  | 17500 | 8750  | .4977 | .5023 | 8631  | 17420 | 8790  | 8591  | 17500 | 8750  | 159 | .73  |
| 35000 | .55 | .45 | 10588 | 17325 | 7088  | .5478 | .4522 | 10453 | 17256 | 7122  | 10419 | 17325 | 7088  | 168 | .55  |
| 35000 | .60 | .40 | 12600 | 16800 | 5600  | .5980 | .4020 | 12452 | 16743 | 5628  | 12424 | 16800 | 5600  | 176 | .40  |
| 35000 | .65 | .35 | 14788 | 15925 | 4288  | .6482 | .3518 | 14629 | 15880 | 4310  | 14606 | 15925 | 4288  | 181 | .27  |
| 35000 | .70 | .30 | 17150 | 14700 | 3150  | .6984 | .3016 | 16983 | 14667 | 3167  | 16967 | 14700 | 3150  | 183 | .18  |
| 35000 | .75 | .25 | 19688 | 13125 | 2188  | .7487 | .2513 | 19517 | 13102 | 2199  | 19506 | 13125 | 2188  | 182 | .11  |
| 35000 | .80 | .20 | 22400 | 11200 | 1400  | .7990 | .2010 | 22231 | 11186 | 1407  | 22224 | 11200 | 1400  | 176 | .06  |
| 35000 | .85 | .15 | 25288 | 8925  | 788   | .8493 | .1507 | 25127 | 8918  | 791   | 25123 | 8925  | 788   | 164 | .02  |
| 35000 | .90 | .10 | 28350 | 6300  | 350   | .8996 | .1004 | 28208 | 6297  | 351   | 28206 | 6300  | 350   | 144 | .01  |
| 35000 | .95 | .05 | 31588 | 3325  | 88    | .9498 | .0502 | 31479 | 3324  | 88    | 31479 | 3325  | 88    | 109 | .00  |
| 36000 | .05 | .95 | 90    | 3420  | 32490 | .0495 | .9505 | 88    | 3386  | 32507 | 71    | 3420  | 32490 | 19  | 3.53 |
| 36000 | .10 | .90 | 360   | 6480  | 29160 | .0991 | .9009 | 353   | 6420  | 29190 | 323   | 6480  | 29160 | 37  | 3.14 |
| 36000 | .15 | .85 | 810   | 9180  | 26010 | .1487 | .8513 | 795   | 9100  | 26050 | 755   | 9180  | 26010 | 55  | 2.77 |
| 36000 | .20 | .80 | 1440  | 11520 | 23040 | .1984 | .8016 | 1414  | 11427 | 23087 | 1367  | 11520 | 23040 | 73  | 2.40 |
| 36000 | .25 | .75 | 2250  | 13500 | 20250 | .2481 | .7519 | 2211  | 13398 | 20301 | 2160  | 13500 | 20250 | 90  | 2.06 |
| 36000 | .30 | .70 | 3240  | 15120 | 17640 | .2979 | .7021 | 3186  | 15015 | 17692 | 3134  | 15120 | 17640 | 106 | 1.74 |
| 36000 | .35 | .65 | 4410  | 16380 | 15210 | .3478 | .6522 | 4340  | 16277 | 15262 | 4288  | 16380 | 15210 | 122 | 1.45 |
| 36000 | .40 | .60 | 5760  | 17280 | 12960 | .3977 | .6023 | 5673  | 17181 | 13009 | 5624  | 17280 | 12960 | 136 | 1.18 |
| 36000 | .45 | .55 | 7290  | 17820 | 10890 | .4477 | .5523 | 7186  | 17729 | 10935 | 7141  | 17820 | 10890 | 149 | .94  |
| 36000 | .50 | .50 | 9000  | 18000 | 9000  | .4978 | .5022 | 8879  | 17919 | 9040  | 8839  | 18000 | 9000  | 161 | .73  |
| 36000 | .55 | .45 | 10890 | 17820 | 7290  | .5479 | .4521 | 10754 | 17750 | 7325  | 10719 | 17820 | 7290  | 171 | .55  |
| 36000 | .60 | .40 | 12960 | 17280 | 5760  | .5980 | .4020 | 12810 | 17223 | 5789  | 12781 | 17280 | 5760  | 179 | .40  |
| 36000 | .65 | .35 | 15210 | 16380 | 4410  | .6482 | .3518 | 15049 | 16335 | 4433  | 15026 | 16380 | 4410  | 184 | .27  |
| 36000 | .70 | .30 | 17640 | 15120 | 3240  | .6984 | .3016 | 17471 | 15086 | 3257  | 17454 | 15120 | 3240  | 186 | .18  |
| 36000 | .75 | .25 | 20250 | 13500 | 2250  | .7487 | .2513 | 20077 | 13477 | 2262  | 20066 | 13500 | 2250  | 184 | .11  |
| 36000 | .80 | .20 | 23040 | 11520 | 1440  | .7990 | .2010 | 22869 | 11506 | 1447  | 22861 | 11520 | 1440  | 179 | .06  |
| 36000 | .85 | .15 | 26010 | 9180  | 810   | .8493 | .1507 | 25847 | 9172  | 814   | 25843 | 9180  | 810   | 167 | .02  |
| 36000 | .90 | .10 | 29160 | 6480  | 360   | .8996 | .1004 | 29016 | 6477  | 361   | 29014 | 6480  | 360   | 146 | .01  |
| 36000 | .95 | .05 | 32490 | 3420  | 90    | .9498 | .0502 | 32380 | 3419  | 90    | 32380 | 3420  | 90    | 110 | .00  |

|       |     |     |       |       |       |       |       |       |       |       |       |       |       |     |      |
|-------|-----|-----|-------|-------|-------|-------|-------|-------|-------|-------|-------|-------|-------|-----|------|
| 37000 | .05 | .95 | 93    | 3515  | 33393 | .0495 | .9505 | 91    | 3481  | 33410 | 74    | 3515  | 33393 | 19  | 3.53 |
| 37000 | .10 | .90 | 370   | 6660  | 29970 | .0991 | .9009 | 363   | 6599  | 30000 | 332   | 6660  | 29970 | 38  | 3.14 |
| 37000 | .15 | .85 | 833   | 9435  | 26733 | .1487 | .8513 | 817   | 9354  | 26773 | 777   | 9435  | 26733 | 56  | 2.76 |
| 37000 | .20 | .80 | 1480  | 11840 | 23680 | .1984 | .8016 | 1453  | 11745 | 23727 | 1406  | 11840 | 23680 | 74  | 2.40 |
| 37000 | .25 | .75 | 2313  | 13875 | 20813 | .2481 | .7519 | 2273  | 13772 | 20864 | 2221  | 13875 | 20813 | 91  | 2.06 |
| 37000 | .30 | .70 | 3330  | 15540 | 18130 | .2980 | .7020 | 3275  | 15434 | 18183 | 3222  | 15540 | 18130 | 108 | 1.74 |
| 37000 | .35 | .65 | 4533  | 16835 | 15633 | .3478 | .6522 | 4461  | 16730 | 15685 | 4409  | 16835 | 15633 | 124 | 1.45 |
| 37000 | .40 | .60 | 5920  | 17760 | 13320 | .3978 | .6022 | 5832  | 17660 | 13370 | 5782  | 17760 | 13320 | 138 | 1.18 |
| 37000 | .45 | .55 | 7493  | 18315 | 11193 | .4477 | .5523 | 7387  | 18223 | 11239 | 7341  | 18315 | 11193 | 152 | .94  |
| 37000 | .50 | .50 | 9250  | 18500 | 9250  | .4978 | .5022 | 9128  | 18418 | 9291  | 9087  | 18500 | 9250  | 163 | .73  |
| 37000 | .55 | .45 | 11193 | 18315 | 7493  | .5479 | .4521 | 11055 | 18245 | 7528  | 11019 | 18315 | 7493  | 173 | .55  |
| 37000 | .60 | .40 | 13320 | 17760 | 5920  | .5980 | .4020 | 13168 | 17702 | 5949  | 13139 | 17760 | 5920  | 181 | .40  |
| 37000 | .65 | .35 | 15633 | 16835 | 4533  | .6482 | .3518 | 15469 | 16789 | 4555  | 15446 | 16835 | 4533  | 186 | .27  |
| 37000 | .70 | .30 | 18130 | 15540 | 3330  | .6985 | .3015 | 17959 | 15506 | 3347  | 17942 | 15540 | 3330  | 188 | .18  |
| 37000 | .75 | .25 | 20813 | 13875 | 2313  | .7487 | .2513 | 20637 | 13852 | 2324  | 20625 | 13875 | 2313  | 187 | .11  |
| 37000 | .80 | .20 | 23680 | 11840 | 1480  | .7990 | .2010 | 23506 | 11825 | 1487  | 23499 | 11840 | 1480  | 181 | .06  |
| 37000 | .85 | .15 | 26733 | 9435  | 833   | .8493 | .1507 | 26568 | 9427  | 836   | 26564 | 9435  | 833   | 169 | .02  |
| 37000 | .90 | .10 | 29970 | 6660  | 370   | .8996 | .1004 | 29824 | 6657  | 371   | 29822 | 6660  | 370   | 148 | .01  |
| 37000 | .95 | .05 | 33393 | 3515  | 93    | .9498 | .0502 | 33281 | 3514  | 93    | 33281 | 3515  | 93    | 112 | .00  |
| 38000 | .05 | .95 | 95    | 3610  | 34295 | .0495 | .9505 | 93    | 3576  | 34312 | 76    | 3610  | 34295 | 19  | 3.53 |
| 38000 | .10 | .90 | 380   | 6840  | 30780 | .0991 | .9009 | 373   | 6778  | 30811 | 342   | 6840  | 30780 | 38  | 3.14 |
| 38000 | .15 | .85 | 855   | 9690  | 27455 | .1487 | .8513 | 839   | 9608  | 27496 | 798   | 9690  | 27455 | 57  | 2.76 |
| 38000 | .20 | .80 | 1520  | 12160 | 24320 | .1984 | .8016 | 1493  | 12064 | 24368 | 1445  | 12160 | 24320 | 75  | 2.40 |
| 38000 | .25 | .75 | 2375  | 14250 | 21375 | .2482 | .7518 | 2335  | 14146 | 21427 | 2283  | 14250 | 21375 | 92  | 2.06 |
| 38000 | .30 | .70 | 3420  | 15960 | 18620 | .2980 | .7020 | 3364  | 15853 | 18674 | 3311  | 15960 | 18620 | 109 | 1.74 |
| 38000 | .35 | .65 | 4655  | 17290 | 16055 | .3479 | .6521 | 4583  | 17184 | 16108 | 4530  | 17290 | 16055 | 125 | 1.45 |
| 38000 | .40 | .60 | 6080  | 18240 | 13680 | .3978 | .6022 | 5991  | 18139 | 13731 | 5940  | 18240 | 13680 | 140 | 1.18 |
| 38000 | .45 | .55 | 7695  | 18810 | 11495 | .4478 | .5522 | 7588  | 18717 | 11542 | 7541  | 18810 | 11495 | 154 | .94  |
| 38000 | .50 | .50 | 9500  | 19000 | 9500  | .4978 | .5022 | 9376  | 18917 | 9542  | 9335  | 19000 | 9500  | 165 | .73  |
| 38000 | .55 | .45 | 11495 | 18810 | 7695  | .5479 | .4521 | 11355 | 18739 | 7731  | 11319 | 18810 | 7695  | 176 | .55  |
| 38000 | .60 | .40 | 13680 | 18240 | 6080  | .5981 | .4019 | 13526 | 18181 | 6109  | 13497 | 18240 | 6080  | 183 | .40  |
| 38000 | .65 | .35 | 16055 | 17290 | 4655  | .6483 | .3517 | 15890 | 17244 | 4678  | 15866 | 17290 | 4655  | 189 | .27  |
| 38000 | .70 | .30 | 18620 | 15960 | 3420  | .6985 | .3015 | 18446 | 15925 | 3437  | 18429 | 15960 | 3420  | 191 | .18  |

|       |     |     |       |       |       |       |       |       |       |       |       |       |       |     |      |
|-------|-----|-----|-------|-------|-------|-------|-------|-------|-------|-------|-------|-------|-------|-----|------|
| 38000 | .75 | .25 | 21375 | 14250 | 2375  | .7487 | .2513 | 21197 | 14226 | 2387  | 21185 | 14250 | 2375  | 190 | .11  |
| 38000 | .80 | .20 | 24320 | 12160 | 1520  | .7990 | .2010 | 24144 | 12145 | 1527  | 24137 | 12160 | 1520  | 183 | .06  |
| 38000 | .85 | .15 | 27455 | 9690  | 855   | .8493 | .1507 | 27288 | 9682  | 859   | 27284 | 9690  | 855   | 171 | .02  |
| 38000 | .90 | .10 | 30780 | 6840  | 380   | .8996 | .1004 | 30632 | 6837  | 382   | 30630 | 6840  | 380   | 150 | .01  |
| 38000 | .95 | .05 | 34295 | 3610  | 95    | .9499 | .0501 | 34182 | 3609  | 95    | 34182 | 3610  | 95    | 113 | .00  |
| 39000 | .05 | .95 | 98    | 3705  | 35198 | .0495 | .9505 | 96    | 3670  | 35215 | 78    | 3705  | 35198 | 19  | 3.53 |
| 39000 | .10 | .90 | 390   | 7020  | 31590 | .0991 | .9009 | 383   | 6958  | 31621 | 351   | 7020  | 31590 | 39  | 3.14 |
| 39000 | .15 | .85 | 878   | 9945  | 28178 | .1487 | .8513 | 862   | 9862  | 28219 | 820   | 9945  | 28178 | 57  | 2.76 |
| 39000 | .20 | .80 | 1560  | 12480 | 24960 | .1984 | .8016 | 1533  | 12383 | 25009 | 1484  | 12480 | 24960 | 76  | 2.40 |
| 39000 | .25 | .75 | 2438  | 14625 | 21938 | .2482 | .7518 | 2397  | 14519 | 21990 | 2344  | 14625 | 21938 | 94  | 2.06 |
| 39000 | .30 | .70 | 3510  | 16380 | 19110 | .2980 | .7020 | 3454  | 16271 | 19164 | 3399  | 16380 | 19110 | 111 | 1.74 |
| 39000 | .35 | .65 | 4778  | 17745 | 16478 | .3479 | .6521 | 4704  | 17637 | 16531 | 4651  | 17745 | 16478 | 127 | 1.45 |
| 39000 | .40 | .60 | 6240  | 18720 | 14040 | .3978 | .6022 | 6149  | 18617 | 14091 | 6098  | 18720 | 14040 | 142 | 1.18 |
| 39000 | .45 | .55 | 7898  | 19305 | 11798 | .4478 | .5522 | 7789  | 19211 | 11845 | 7742  | 19305 | 11798 | 156 | .94  |
| 39000 | .50 | .50 | 9750  | 19500 | 9750  | .4978 | .5022 | 9624  | 19416 | 9792  | 9582  | 19500 | 9750  | 168 | .73  |
| 39000 | .55 | .45 | 11798 | 19305 | 7898  | .5479 | .4521 | 11656 | 19233 | 7934  | 11620 | 19305 | 7898  | 178 | .55  |
| 39000 | .60 | .40 | 14040 | 18720 | 6240  | .5981 | .4019 | 13884 | 18660 | 6270  | 13854 | 18720 | 6240  | 186 | .40  |
| 39000 | .65 | .35 | 16478 | 17745 | 4778  | .6483 | .3517 | 16310 | 17698 | 4801  | 16286 | 17745 | 4778  | 191 | .27  |
| 39000 | .70 | .30 | 19110 | 16380 | 3510  | .6985 | .3015 | 18934 | 16345 | 3528  | 18917 | 16380 | 3510  | 193 | .18  |
| 39000 | .75 | .25 | 21938 | 14625 | 2438  | .7488 | .2512 | 21758 | 14601 | 2450  | 21745 | 14625 | 2438  | 192 | .11  |
| 39000 | .80 | .20 | 24960 | 12480 | 1560  | .7990 | .2010 | 24782 | 12465 | 1567  | 24774 | 12480 | 1560  | 186 | .06  |
| 39000 | .85 | .15 | 28178 | 9945  | 878   | .8493 | .1507 | 28008 | 9937  | 881   | 28004 | 9945  | 878   | 173 | .02  |
| 39000 | .90 | .10 | 31590 | 7020  | 390   | .8996 | .1004 | 31440 | 7017  | 392   | 31438 | 7020  | 390   | 152 | .01  |
| 39000 | .95 | .05 | 35198 | 3705  | 98    | .9499 | .0501 | 35083 | 3704  | 98    | 35083 | 3705  | 98    | 115 | .00  |
| 40000 | .05 | .95 | 100   | 3800  | 36100 | .0495 | .9505 | 98    | 3765  | 36118 | 80    | 3800  | 36100 | 20  | 3.53 |
| 40000 | .10 | .90 | 400   | 7200  | 32400 | .0991 | .9009 | 393   | 7137  | 32432 | 361   | 7200  | 32400 | 39  | 3.14 |
| 40000 | .15 | .85 | 900   | 10200 | 28900 | .1488 | .8512 | 884   | 10116 | 28942 | 842   | 10200 | 28900 | 58  | 2.76 |
| 40000 | .20 | .80 | 1600  | 12800 | 25600 | .1985 | .8015 | 1572  | 12701 | 25649 | 1523  | 12800 | 25600 | 77  | 2.40 |
| 40000 | .25 | .75 | 2500  | 15000 | 22500 | .2482 | .7518 | 2459  | 14893 | 22554 | 2405  | 15000 | 22500 | 95  | 2.06 |
| 40000 | .30 | .70 | 3600  | 16800 | 19600 | .2980 | .7020 | 3543  | 16690 | 19655 | 3488  | 16800 | 19600 | 112 | 1.74 |
| 40000 | .35 | .65 | 4900  | 18200 | 16900 | .3479 | .6521 | 4826  | 18091 | 16954 | 4771  | 18200 | 16900 | 129 | 1.45 |
| 40000 | .40 | .60 | 6400  | 19200 | 14400 | .3978 | .6022 | 6308  | 19096 | 14452 | 6256  | 19200 | 14400 | 144 | 1.18 |
| 40000 | .45 | .55 | 8100  | 19800 | 12100 | .4478 | .5522 | 7990  | 19704 | 12148 | 7942  | 19800 | 12100 | 158 | .94  |

|       |     |     |       |       |       |       |       |       |       |       |       |       |       |     |      |
|-------|-----|-----|-------|-------|-------|-------|-------|-------|-------|-------|-------|-------|-------|-----|------|
| 40000 | .50 | .50 | 10000 | 20000 | 10000 | .4979 | .5021 | 9873  | 19915 | 10043 | 9830  | 20000 | 10000 | 170 | .73  |
| 40000 | .55 | .45 | 12100 | 19800 | 8100  | .5480 | .4520 | 11957 | 19727 | 8137  | 11920 | 19800 | 8100  | 180 | .55  |
| 40000 | .60 | .40 | 14400 | 19200 | 6400  | .5981 | .4019 | 14242 | 19140 | 6430  | 14212 | 19200 | 6400  | 188 | .40  |
| 40000 | .65 | .35 | 16900 | 18200 | 4900  | .6483 | .3517 | 16730 | 18152 | 4924  | 16706 | 18200 | 4900  | 194 | .27  |
| 40000 | .70 | .30 | 19600 | 16800 | 3600  | .6985 | .3015 | 19422 | 16765 | 3618  | 19404 | 16800 | 3600  | 196 | .18  |
| 40000 | .75 | .25 | 22500 | 15000 | 2500  | .7488 | .2512 | 22318 | 14976 | 2512  | 22306 | 15000 | 2500  | 194 | .11  |
| 40000 | .80 | .20 | 25600 | 12800 | 1600  | .7991 | .2009 | 25419 | 12785 | 1608  | 25412 | 12800 | 1600  | 188 | .06  |
| 40000 | .85 | .15 | 28900 | 10200 | 900   | .8493 | .1507 | 28728 | 10192 | 904   | 28724 | 10200 | 900   | 176 | .02  |
| 40000 | .90 | .10 | 32400 | 7200  | 400   | .8996 | .1004 | 32248 | 7197  | 402   | 32246 | 7200  | 400   | 154 | .01  |
| 40000 | .95 | .05 | 36100 | 3800  | 100   | .9499 | .0501 | 35984 | 3799  | 100   | 35984 | 3800  | 100   | 116 | .00  |
| 41000 | .05 | .95 | 103   | 3895  | 37003 | .0495 | .9505 | 101   | 3859  | 37020 | 83    | 3895  | 37003 | 20  | 3.52 |
| 41000 | .10 | .90 | 410   | 7380  | 33210 | .0991 | .9009 | 403   | 7316  | 33242 | 371   | 7380  | 33210 | 39  | 3.14 |
| 41000 | .15 | .85 | 923   | 10455 | 29623 | .1488 | .8512 | 906   | 10370 | 29665 | 864   | 10455 | 29623 | 59  | 2.76 |
| 41000 | .20 | .80 | 1640  | 13120 | 26240 | .1985 | .8015 | 1612  | 13020 | 26290 | 1562  | 13120 | 26240 | 78  | 2.40 |
| 41000 | .25 | .75 | 2563  | 15375 | 23063 | .2482 | .7518 | 2521  | 15267 | 23117 | 2466  | 15375 | 23063 | 96  | 2.06 |
| 41000 | .30 | .70 | 3690  | 17220 | 20090 | .2981 | .7019 | 3632  | 17108 | 20146 | 3576  | 17220 | 20090 | 114 | 1.74 |
| 41000 | .35 | .65 | 5023  | 18655 | 17323 | .3479 | .6521 | 4948  | 18545 | 17378 | 4892  | 18655 | 17323 | 130 | 1.45 |
| 41000 | .40 | .60 | 6560  | 19680 | 14760 | .3979 | .6021 | 6467  | 19575 | 14813 | 6415  | 19680 | 14760 | 145 | 1.18 |
| 41000 | .45 | .55 | 8303  | 20295 | 12403 | .4479 | .5521 | 8191  | 20198 | 12451 | 8143  | 20295 | 12403 | 159 | .94  |
| 41000 | .50 | .50 | 10250 | 20500 | 10250 | .4979 | .5021 | 10121 | 20414 | 10293 | 10078 | 20500 | 10250 | 172 | .73  |
| 41000 | .55 | .45 | 12403 | 20295 | 8303  | .5480 | .4520 | 12257 | 20221 | 8340  | 12220 | 20295 | 8303  | 182 | .55  |
| 41000 | .60 | .40 | 14760 | 19680 | 6560  | .5981 | .4019 | 14600 | 19619 | 6591  | 14570 | 19680 | 6560  | 190 | .40  |
| 41000 | .65 | .35 | 17323 | 18655 | 5023  | .6483 | .3517 | 17151 | 18607 | 5047  | 17126 | 18655 | 5023  | 196 | .27  |
| 41000 | .70 | .30 | 20090 | 17220 | 3690  | .6985 | .3015 | 19910 | 17184 | 3708  | 19892 | 17220 | 3690  | 198 | .18  |
| 41000 | .75 | .25 | 23063 | 15375 | 2563  | .7488 | .2512 | 22878 | 15350 | 2575  | 22866 | 15375 | 2563  | 197 | .11  |
| 41000 | .80 | .20 | 26240 | 13120 | 1640  | .7991 | .2009 | 26057 | 13105 | 1648  | 26050 | 13120 | 1640  | 190 | .06  |
| 41000 | .85 | .15 | 29623 | 10455 | 923   | .8493 | .1507 | 29449 | 10447 | 927   | 29445 | 10455 | 923   | 178 | .02  |
| 41000 | .90 | .10 | 33210 | 7380  | 410   | .8996 | .1004 | 33056 | 7377  | 412   | 33054 | 7380  | 410   | 156 | .01  |
| 41000 | .95 | .05 | 37003 | 3895  | 103   | .9499 | .0501 | 36885 | 3894  | 103   | 36885 | 3895  | 103   | 118 | .00  |
| 42000 | .05 | .95 | 105   | 3990  | 37905 | .0495 | .9505 | 103   | 3954  | 37923 | 85    | 3990  | 37905 | 20  | 3.52 |
| 42000 | .10 | .90 | 420   | 7560  | 34020 | .0991 | .9009 | 412   | 7495  | 34052 | 380   | 7560  | 34020 | 40  | 3.14 |
| 42000 | .15 | .85 | 945   | 10710 | 30345 | .1488 | .8512 | 929   | 10624 | 30388 | 885   | 10710 | 30345 | 60  | 2.76 |
| 42000 | .20 | .80 | 1680  | 13440 | 26880 | .1985 | .8015 | 1652  | 13339 | 26930 | 1601  | 13440 | 26880 | 79  | 2.40 |



|       |     |     |       |       |       |       |       |       |       |       |       |       |       |     |      |
|-------|-----|-----|-------|-------|-------|-------|-------|-------|-------|-------|-------|-------|-------|-----|------|
| 42000 | .25 | .75 | 2625  | 15750 | 23625 | .2483 | .7517 | 2583  | 15640 | 23680 | 2528  | 15750 | 23625 | 97  | 2.06 |
| 42000 | .30 | .70 | 3780  | 17640 | 20580 | .2981 | .7019 | 3722  | 17527 | 20636 | 3665  | 17640 | 20580 | 115 | 1.74 |
| 42000 | .35 | .65 | 5145  | 19110 | 17745 | .3480 | .6520 | 5069  | 18998 | 17801 | 5013  | 19110 | 17745 | 132 | 1.45 |
| 42000 | .40 | .60 | 6720  | 20160 | 15120 | .3979 | .6021 | 6626  | 20054 | 15173 | 6573  | 20160 | 15120 | 147 | 1.18 |
| 42000 | .45 | .55 | 8505  | 20790 | 12705 | .4479 | .5521 | 8393  | 20692 | 12754 | 8344  | 20790 | 12705 | 161 | .94  |
| 42000 | .50 | .50 | 10500 | 21000 | 10500 | .4979 | .5021 | 10370 | 20913 | 10544 | 10326 | 21000 | 10500 | 174 | .73  |
| 42000 | .55 | .45 | 12705 | 20790 | 8505  | .5480 | .4520 | 12558 | 20715 | 8543  | 12520 | 20790 | 8505  | 185 | .55  |
| 42000 | .60 | .40 | 15120 | 20160 | 6720  | .5982 | .4018 | 14958 | 20098 | 6751  | 14927 | 20160 | 6720  | 193 | .40  |
| 42000 | .65 | .35 | 17745 | 19110 | 5145  | .6483 | .3517 | 17571 | 19061 | 5169  | 17547 | 19110 | 5145  | 198 | .27  |
| 42000 | .70 | .30 | 20580 | 17640 | 3780  | .6986 | .3014 | 20397 | 17604 | 3798  | 20379 | 17640 | 3780  | 201 | .18  |
| 42000 | .75 | .25 | 23625 | 15750 | 2625  | .7488 | .2512 | 23438 | 15725 | 2638  | 23426 | 15750 | 2625  | 199 | .11  |
| 42000 | .80 | .20 | 26880 | 13440 | 1680  | .7991 | .2009 | 26695 | 13425 | 1688  | 26687 | 13440 | 1680  | 193 | .06  |
| 42000 | .85 | .15 | 30345 | 10710 | 945   | .8494 | .1506 | 30169 | 10702 | 949   | 30165 | 10710 | 945   | 180 | .02  |
| 42000 | .90 | .10 | 34020 | 7560  | 420   | .8996 | .1004 | 33864 | 7557  | 422   | 33862 | 7560  | 420   | 158 | .01  |
| 42000 | .95 | .05 | 37905 | 3990  | 105   | .9499 | .0501 | 37786 | 3989  | 105   | 37786 | 3990  | 105   | 119 | .00  |
| 43000 | .05 | .95 | 108   | 4085  | 38808 | .0496 | .9504 | 106   | 4048  | 38826 | 87    | 4085  | 38808 | 20  | 3.52 |
| 43000 | .10 | .90 | 430   | 7740  | 34830 | .0992 | .9008 | 422   | 7674  | 34863 | 390   | 7740  | 34830 | 40  | 3.14 |
| 43000 | .15 | .85 | 968   | 10965 | 31068 | .1488 | .8512 | 951   | 10878 | 31111 | 907   | 10965 | 31068 | 60  | 2.76 |
| 43000 | .20 | .80 | 1720  | 13760 | 27520 | .1985 | .8015 | 1691  | 13658 | 27571 | 1640  | 13760 | 27520 | 80  | 2.40 |
| 43000 | .25 | .75 | 2688  | 16125 | 24188 | .2483 | .7517 | 2645  | 16014 | 24243 | 2589  | 16125 | 24188 | 98  | 2.06 |
| 43000 | .30 | .70 | 3870  | 18060 | 21070 | .2981 | .7019 | 3811  | 17946 | 21127 | 3754  | 18060 | 21070 | 116 | 1.74 |
| 43000 | .35 | .65 | 5268  | 19565 | 18168 | .3480 | .6520 | 5191  | 19452 | 18224 | 5134  | 19565 | 18168 | 133 | 1.45 |
| 43000 | .40 | .60 | 6880  | 20640 | 15480 | .3979 | .6021 | 6785  | 20532 | 15534 | 6731  | 20640 | 15480 | 149 | 1.18 |
| 43000 | .45 | .55 | 8708  | 21285 | 13008 | .4479 | .5521 | 8594  | 21186 | 13057 | 8544  | 21285 | 13008 | 163 | .94  |
| 43000 | .50 | .50 | 10750 | 21500 | 10750 | .4979 | .5021 | 10618 | 21412 | 10794 | 10574 | 21500 | 10750 | 176 | .73  |
| 43000 | .55 | .45 | 13008 | 21285 | 8708  | .5480 | .4520 | 12859 | 21209 | 8745  | 12821 | 21285 | 8708  | 187 | .55  |
| 43000 | .60 | .40 | 15480 | 20640 | 6880  | .5982 | .4018 | 15316 | 20577 | 6911  | 15285 | 20640 | 6880  | 195 | .40  |
| 43000 | .65 | .35 | 18168 | 19565 | 5268  | .6484 | .3516 | 17991 | 19516 | 5292  | 17967 | 19565 | 5268  | 201 | .27  |
| 43000 | .70 | .30 | 21070 | 18060 | 3870  | .6986 | .3014 | 20885 | 18023 | 3888  | 20867 | 18060 | 3870  | 203 | .18  |
| 43000 | .75 | .25 | 24188 | 16125 | 2688  | .7488 | .2512 | 23999 | 16100 | 2700  | 23986 | 16125 | 2688  | 202 | .11  |
| 43000 | .80 | .20 | 27520 | 13760 | 1720  | .7991 | .2009 | 27333 | 13744 | 1728  | 27325 | 13760 | 1720  | 195 | .06  |
| 43000 | .85 | .15 | 31068 | 10965 | 968   | .8494 | .1506 | 30890 | 10957 | 972   | 30886 | 10965 | 968   | 182 | .02  |
| 43000 | .90 | .10 | 34830 | 7740  | 430   | .8996 | .1004 | 34672 | 7737  | 432   | 34671 | 7740  | 430   | 159 | .01  |

|       |     |     |       |       |       |       |       |       |       |       |       |       |       |     |      |
|-------|-----|-----|-------|-------|-------|-------|-------|-------|-------|-------|-------|-------|-------|-----|------|
| 43000 | .95 | .05 | 38808 | 4085  | 108   | .9499 | .0501 | 38687 | 4084  | 108   | 38687 | 4085  | 108   | 121 | .00  |
| 44000 | .05 | .95 | 110   | 4180  | 39710 | .0496 | .9504 | 108   | 4143  | 39729 | 89    | 4180  | 39710 | 21  | 3.52 |
| 44000 | .10 | .90 | 440   | 7920  | 35640 | .0992 | .9008 | 432   | 7854  | 35673 | 399   | 7920  | 35640 | 41  | 3.14 |
| 44000 | .15 | .85 | 990   | 11220 | 31790 | .1488 | .8512 | 973   | 11132 | 31834 | 929   | 11220 | 31790 | 61  | 2.76 |
| 44000 | .20 | .80 | 1760  | 14080 | 28160 | .1985 | .8015 | 1731  | 13977 | 28212 | 1679  | 14080 | 28160 | 81  | 2.40 |
| 44000 | .25 | .75 | 2750  | 16500 | 24750 | .2483 | .7517 | 2707  | 16388 | 24806 | 2650  | 16500 | 24750 | 100 | 2.06 |
| 44000 | .30 | .70 | 3960  | 18480 | 21560 | .2981 | .7019 | 3900  | 18364 | 21618 | 3842  | 18480 | 21560 | 118 | 1.74 |
| 44000 | .35 | .65 | 5390  | 20020 | 18590 | .3480 | .6520 | 5312  | 19906 | 18647 | 5255  | 20020 | 18590 | 135 | 1.45 |
| 44000 | .40 | .60 | 7040  | 21120 | 15840 | .3979 | .6021 | 6944  | 21011 | 15894 | 6889  | 21120 | 15840 | 151 | 1.18 |
| 44000 | .45 | .55 | 8910  | 21780 | 13310 | .4479 | .5521 | 8795  | 21680 | 13360 | 8745  | 21780 | 13310 | 165 | .94  |
| 44000 | .50 | .50 | 11000 | 22000 | 11000 | .4980 | .5020 | 10867 | 21911 | 11045 | 10822 | 22000 | 11000 | 178 | .73  |
| 44000 | .55 | .45 | 13310 | 21780 | 8910  | .5481 | .4519 | 13160 | 21703 | 8948  | 13121 | 21780 | 8910  | 189 | .55  |
| 44000 | .60 | .40 | 15840 | 21120 | 7040  | .5982 | .4018 | 15674 | 21057 | 7072  | 15643 | 21120 | 7040  | 197 | .40  |
| 44000 | .65 | .35 | 18590 | 20020 | 5390  | .6484 | .3516 | 18412 | 19970 | 5415  | 18387 | 20020 | 5390  | 203 | .27  |
| 44000 | .70 | .30 | 21560 | 18480 | 3960  | .6986 | .3014 | 21373 | 18443 | 3979  | 21354 | 18480 | 3960  | 206 | .18  |
| 44000 | .75 | .25 | 24750 | 16500 | 2750  | .7488 | .2512 | 24559 | 16474 | 2763  | 24546 | 16500 | 2750  | 204 | .11  |
| 44000 | .80 | .20 | 28160 | 14080 | 1760  | .7991 | .2009 | 27971 | 14064 | 1768  | 27963 | 14080 | 1760  | 197 | .06  |
| 44000 | .85 | .15 | 31790 | 11220 | 990   | .8494 | .1506 | 31610 | 11212 | 994   | 31606 | 11220 | 990   | 184 | .02  |
| 44000 | .90 | .10 | 35640 | 7920  | 440   | .8996 | .1004 | 35480 | 7917  | 442   | 35479 | 7920  | 440   | 161 | .01  |
| 44000 | .95 | .05 | 39710 | 4180  | 110   | .9499 | .0501 | 39588 | 4179  | 110   | 39588 | 4180  | 110   | 122 | .00  |
| 45000 | .05 | .95 | 113   | 4275  | 40613 | .0496 | .9504 | 110   | 4238  | 40631 | 92    | 4275  | 40613 | 21  | 3.52 |
| 45000 | .10 | .90 | 450   | 8100  | 36450 | .0992 | .9008 | 442   | 8033  | 36484 | 409   | 8100  | 36450 | 41  | 3.14 |
| 45000 | .15 | .85 | 1013  | 11475 | 32513 | .1488 | .8512 | 995   | 11386 | 32557 | 951   | 11475 | 32513 | 62  | 2.76 |
| 45000 | .20 | .80 | 1800  | 14400 | 28800 | .1985 | .8015 | 1771  | 14296 | 28852 | 1719  | 14400 | 28800 | 81  | 2.40 |
| 45000 | .25 | .75 | 2813  | 16875 | 25313 | .2483 | .7517 | 2769  | 16762 | 25369 | 2712  | 16875 | 25313 | 101 | 2.06 |
| 45000 | .30 | .70 | 4050  | 18900 | 22050 | .2981 | .7019 | 3989  | 18783 | 22108 | 3931  | 18900 | 22050 | 119 | 1.74 |
| 45000 | .35 | .65 | 5513  | 20475 | 19013 | .3480 | .6520 | 5434  | 20359 | 19070 | 5376  | 20475 | 19013 | 136 | 1.44 |
| 45000 | .40 | .60 | 7200  | 21600 | 16200 | .3980 | .6020 | 7103  | 21490 | 16255 | 7048  | 21600 | 16200 | 152 | 1.18 |
| 45000 | .45 | .55 | 9113  | 22275 | 13613 | .4480 | .5520 | 8996  | 22174 | 13663 | 8945  | 22275 | 13613 | 167 | .94  |
| 45000 | .50 | .50 | 11250 | 22500 | 11250 | .4980 | .5020 | 11115 | 22410 | 11295 | 11070 | 22500 | 11250 | 180 | .73  |
| 45000 | .55 | .45 | 13613 | 22275 | 9113  | .5481 | .4519 | 13460 | 22197 | 9151  | 13422 | 22275 | 9113  | 191 | .55  |
| 45000 | .60 | .40 | 16200 | 21600 | 7200  | .5982 | .4018 | 16033 | 21536 | 7232  | 16000 | 21600 | 7200  | 200 | .40  |
| 45000 | .65 | .35 | 19013 | 20475 | 5513  | .6484 | .3516 | 18832 | 20424 | 5538  | 18807 | 20475 | 5513  | 205 | .27  |

|       |     |     |       |       |       |       |       |       |       |       |       |       |       |     |      |
|-------|-----|-----|-------|-------|-------|-------|-------|-------|-------|-------|-------|-------|-------|-----|------|
| 45000 | .70 | .30 | 22050 | 18900 | 4050  | .6986 | .3014 | 21861 | 18862 | 4069  | 21842 | 18900 | 4050  | 208 | .18  |
| 45000 | .75 | .25 | 25313 | 16875 | 2813  | .7488 | .2512 | 25119 | 16849 | 2825  | 25106 | 16875 | 2813  | 206 | .11  |
| 45000 | .80 | .20 | 28800 | 14400 | 1800  | .7991 | .2009 | 28608 | 14384 | 1808  | 28600 | 14400 | 1800  | 200 | .06  |
| 45000 | .85 | .15 | 32513 | 11475 | 1013  | .8494 | .1506 | 32331 | 11467 | 1017  | 32326 | 11475 | 1013  | 186 | .02  |
| 45000 | .90 | .10 | 36450 | 8100  | 450   | .8996 | .1004 | 36289 | 8097  | 452   | 36287 | 8100  | 450   | 163 | .01  |
| 45000 | .95 | .05 | 40613 | 4275  | 113   | .9499 | .0501 | 40489 | 4274  | 113   | 40489 | 4275  | 113   | 123 | .00  |
| 46000 | .05 | .95 | 115   | 4370  | 41515 | .0496 | .9504 | 113   | 4332  | 41534 | 94    | 4370  | 41515 | 21  | 3.52 |
| 46000 | .10 | .90 | 460   | 8280  | 37260 | .0992 | .9008 | 452   | 8212  | 37294 | 418   | 8280  | 37260 | 42  | 3.13 |
| 46000 | .15 | .85 | 1035  | 11730 | 33235 | .1488 | .8512 | 1018  | 11640 | 33280 | 973   | 11730 | 33235 | 62  | 2.76 |
| 46000 | .20 | .80 | 1840  | 14720 | 29440 | .1986 | .8014 | 1810  | 14614 | 29493 | 1758  | 14720 | 29440 | 82  | 2.40 |
| 46000 | .25 | .75 | 2875  | 17250 | 25875 | .2483 | .7517 | 2831  | 17135 | 25932 | 2773  | 17250 | 25875 | 102 | 2.06 |
| 46000 | .30 | .70 | 4140  | 19320 | 22540 | .2982 | .7018 | 4079  | 19202 | 22599 | 4020  | 19320 | 22540 | 120 | 1.74 |
| 46000 | .35 | .65 | 5635  | 20930 | 19435 | .3480 | .6520 | 5556  | 20813 | 19493 | 5497  | 20930 | 19435 | 138 | 1.44 |
| 46000 | .40 | .60 | 7360  | 22080 | 16560 | .3980 | .6020 | 7262  | 21969 | 16616 | 7206  | 22080 | 16560 | 154 | 1.18 |
| 46000 | .45 | .55 | 9315  | 22770 | 13915 | .4480 | .5520 | 9197  | 22667 | 13966 | 9146  | 22770 | 13915 | 169 | .94  |
| 46000 | .50 | .50 | 11500 | 23000 | 11500 | .4980 | .5020 | 11364 | 22909 | 11546 | 11318 | 23000 | 11500 | 182 | .73  |
| 46000 | .55 | .45 | 13915 | 22770 | 9315  | .5481 | .4519 | 13761 | 22691 | 9354  | 13722 | 22770 | 9315  | 193 | .55  |
| 46000 | .60 | .40 | 16560 | 22080 | 7360  | .5982 | .4018 | 16391 | 22015 | 7392  | 16358 | 22080 | 7360  | 202 | .40  |
| 46000 | .65 | .35 | 19435 | 20930 | 5635  | .6484 | .3516 | 19253 | 20879 | 5661  | 19227 | 20930 | 5635  | 208 | .27  |
| 46000 | .70 | .30 | 22540 | 19320 | 4140  | .6986 | .3014 | 22349 | 19282 | 4159  | 22330 | 19320 | 4140  | 210 | .18  |
| 46000 | .75 | .25 | 25875 | 17250 | 2875  | .7489 | .2511 | 25680 | 17224 | 2888  | 25666 | 17250 | 2875  | 209 | .11  |
| 46000 | .80 | .20 | 29440 | 14720 | 1840  | .7991 | .2009 | 29246 | 14704 | 1848  | 29238 | 14720 | 1840  | 202 | .06  |
| 46000 | .85 | .15 | 33235 | 11730 | 1035  | .8494 | .1506 | 33051 | 11721 | 1039  | 33047 | 11730 | 1035  | 188 | .02  |
| 46000 | .90 | .10 | 37260 | 8280  | 460   | .8996 | .1004 | 37097 | 8277  | 462   | 37095 | 8280  | 460   | 165 | .01  |
| 46000 | .95 | .05 | 41515 | 4370  | 115   | .9499 | .0501 | 41391 | 4369  | 115   | 41390 | 4370  | 115   | 125 | .00  |
| 47000 | .05 | .95 | 118   | 4465  | 42418 | .0496 | .9504 | 115   | 4427  | 42437 | 96    | 4465  | 42418 | 21  | 3.52 |
| 47000 | .10 | .90 | 470   | 8460  | 38070 | .0992 | .9008 | 462   | 8391  | 38104 | 428   | 8460  | 38070 | 42  | 3.13 |
| 47000 | .15 | .85 | 1058  | 11985 | 33958 | .1489 | .8511 | 1040  | 11894 | 34003 | 994   | 11985 | 33958 | 63  | 2.76 |
| 47000 | .20 | .80 | 1880  | 15040 | 30080 | .1986 | .8014 | 1850  | 14933 | 30133 | 1797  | 15040 | 30080 | 83  | 2.40 |
| 47000 | .25 | .75 | 2938  | 17625 | 26438 | .2484 | .7516 | 2893  | 17509 | 26495 | 2835  | 17625 | 26438 | 103 | 2.06 |
| 47000 | .30 | .70 | 4230  | 19740 | 23030 | .2982 | .7018 | 4168  | 19621 | 23090 | 4108  | 19740 | 23030 | 122 | 1.74 |
| 47000 | .35 | .65 | 5758  | 21385 | 19858 | .3481 | .6519 | 5677  | 21267 | 19917 | 5618  | 21385 | 19858 | 139 | 1.44 |
| 47000 | .40 | .60 | 7520  | 22560 | 16920 | .3980 | .6020 | 7420  | 22447 | 16976 | 7364  | 22560 | 16920 | 156 | 1.18 |

|       |     |     |       |       |       |       |       |       |       |       |       |       |       |     |      |
|-------|-----|-----|-------|-------|-------|-------|-------|-------|-------|-------|-------|-------|-------|-----|------|
| 47000 | .45 | .55 | 9518  | 23265 | 14218 | .4480 | .5520 | 9399  | 23161 | 14269 | 9347  | 23265 | 14218 | 171 | .94  |
| 47000 | .50 | .50 | 11750 | 23500 | 11750 | .4980 | .5020 | 11612 | 23408 | 11796 | 11566 | 23500 | 11750 | 184 | .73  |
| 47000 | .55 | .45 | 14218 | 23265 | 9518  | .5481 | .4519 | 14062 | 23186 | 9557  | 14022 | 23265 | 9518  | 195 | .55  |
| 47000 | .60 | .40 | 16920 | 22560 | 7520  | .5983 | .4017 | 16749 | 22494 | 7553  | 16716 | 22560 | 7520  | 204 | .40  |
| 47000 | .65 | .35 | 19858 | 21385 | 5758  | .6484 | .3516 | 19673 | 21333 | 5783  | 19648 | 21385 | 5758  | 210 | .27  |
| 47000 | .70 | .30 | 23030 | 19740 | 4230  | .6986 | .3014 | 22837 | 19702 | 4249  | 22818 | 19740 | 4230  | 212 | .18  |
| 47000 | .75 | .25 | 26438 | 17625 | 2938  | .7489 | .2511 | 26240 | 17599 | 2951  | 26227 | 17625 | 2938  | 211 | .11  |
| 47000 | .80 | .20 | 30080 | 15040 | 1880  | .7991 | .2009 | 29884 | 15024 | 1888  | 29876 | 15040 | 1880  | 204 | .06  |
| 47000 | .85 | .15 | 33958 | 11985 | 1058  | .8494 | .1506 | 33772 | 11976 | 1062  | 33767 | 11985 | 1058  | 190 | .02  |
| 47000 | .90 | .10 | 38070 | 8460  | 470   | .8996 | .1004 | 37905 | 8457  | 472   | 37903 | 8460  | 470   | 167 | .01  |
| 47000 | .95 | .05 | 42418 | 4465  | 118   | .9499 | .0501 | 42292 | 4464  | 118   | 42291 | 4465  | 118   | 126 | .00  |
| 48000 | .05 | .95 | 120   | 4560  | 43320 | .0496 | .9504 | 118   | 4521  | 43339 | 99    | 4560  | 43320 | 21  | 3.52 |
| 48000 | .10 | .90 | 480   | 8640  | 38880 | .0992 | .9008 | 472   | 8571  | 38915 | 437   | 8640  | 38880 | 43  | 3.13 |
| 48000 | .15 | .85 | 1080  | 12240 | 34680 | .1489 | .8511 | 1062  | 12148 | 34726 | 1016  | 12240 | 34680 | 64  | 2.76 |
| 48000 | .20 | .80 | 1920  | 15360 | 30720 | .1986 | .8014 | 1890  | 15252 | 30774 | 1836  | 15360 | 30720 | 84  | 2.40 |
| 48000 | .25 | .75 | 3000  | 18000 | 27000 | .2484 | .7516 | 2955  | 17883 | 27059 | 2896  | 18000 | 27000 | 104 | 2.06 |
| 48000 | .30 | .70 | 4320  | 20160 | 23520 | .2982 | .7018 | 4257  | 20039 | 23580 | 4197  | 20160 | 23520 | 123 | 1.74 |
| 48000 | .35 | .65 | 5880  | 21840 | 20280 | .3481 | .6519 | 5799  | 21721 | 20340 | 5739  | 21840 | 20280 | 141 | 1.44 |
| 48000 | .40 | .60 | 7680  | 23040 | 17280 | .3980 | .6020 | 7579  | 22926 | 17337 | 7523  | 23040 | 17280 | 157 | 1.18 |
| 48000 | .45 | .55 | 9720  | 23760 | 14520 | .4480 | .5520 | 9600  | 23655 | 14572 | 9547  | 23760 | 14520 | 173 | .94  |
| 48000 | .50 | .50 | 12000 | 24000 | 12000 | .4981 | .5019 | 11861 | 23907 | 12047 | 11814 | 24000 | 12000 | 186 | .73  |
| 48000 | .55 | .45 | 14520 | 23760 | 9720  | .5481 | .4519 | 14363 | 23680 | 9760  | 14323 | 23760 | 9720  | 197 | .55  |
| 48000 | .60 | .40 | 17280 | 23040 | 7680  | .5983 | .4017 | 17107 | 22974 | 7713  | 17074 | 23040 | 7680  | 206 | .40  |
| 48000 | .65 | .35 | 20280 | 21840 | 5880  | .6484 | .3516 | 20094 | 21788 | 5906  | 20068 | 21840 | 5880  | 212 | .27  |
| 48000 | .70 | .30 | 23520 | 20160 | 4320  | .6987 | .3013 | 23325 | 20121 | 4339  | 23305 | 20160 | 4320  | 215 | .18  |
| 48000 | .75 | .25 | 27000 | 18000 | 3000  | .7489 | .2511 | 26800 | 17973 | 3013  | 26787 | 18000 | 3000  | 213 | .11  |
| 48000 | .80 | .20 | 30720 | 15360 | 1920  | .7991 | .2009 | 30522 | 15343 | 1928  | 30514 | 15360 | 1920  | 206 | .06  |
| 48000 | .85 | .15 | 34680 | 12240 | 1080  | .8494 | .1506 | 34492 | 12231 | 1084  | 34488 | 12240 | 1080  | 192 | .02  |
| 48000 | .90 | .10 | 38880 | 8640  | 480   | .8996 | .1004 | 38713 | 8637  | 482   | 38712 | 8640  | 480   | 168 | .01  |
| 48000 | .95 | .05 | 43320 | 4560  | 120   | .9499 | .0501 | 43193 | 4559  | 120   | 43193 | 4560  | 120   | 127 | .00  |
| 49000 | .05 | .95 | 123   | 4655  | 44223 | .0496 | .9504 | 120   | 4616  | 44242 | 101   | 4655  | 44223 | 22  | 3.52 |
| 49000 | .10 | .90 | 490   | 8820  | 39690 | .0992 | .9008 | 482   | 8750  | 39725 | 447   | 8820  | 39690 | 43  | 3.13 |
| 49000 | .15 | .85 | 1103  | 12495 | 35403 | .1489 | .8511 | 1085  | 12402 | 35449 | 1038  | 12495 | 35403 | 64  | 2.76 |

|       |     |     |       |       |       |       |       |       |       |       |       |       |       |     |      |
|-------|-----|-----|-------|-------|-------|-------|-------|-------|-------|-------|-------|-------|-------|-----|------|
| 49000 | .20 | .80 | 1960  | 15680 | 31360 | .1986 | .8014 | 1929  | 15571 | 31415 | 1875  | 15680 | 31360 | 85  | 2.40 |
| 49000 | .25 | .75 | 3063  | 18375 | 27563 | .2484 | .7516 | 3017  | 18257 | 27622 | 2957  | 18375 | 27563 | 105 | 2.06 |
| 49000 | .30 | .70 | 4410  | 20580 | 24010 | .2982 | .7018 | 4347  | 20458 | 24071 | 4286  | 20580 | 24010 | 124 | 1.74 |
| 49000 | .35 | .65 | 6003  | 22295 | 20703 | .3481 | .6519 | 5921  | 22174 | 20763 | 5860  | 22295 | 20703 | 142 | 1.44 |
| 49000 | .40 | .60 | 7840  | 23520 | 17640 | .3980 | .6020 | 7738  | 23405 | 17697 | 7681  | 23520 | 17640 | 159 | 1.18 |
| 49000 | .45 | .55 | 9923  | 24255 | 14823 | .4480 | .5520 | 9801  | 24149 | 14875 | 9748  | 24255 | 14823 | 174 | .94  |
| 49000 | .50 | .50 | 12250 | 24500 | 12250 | .4981 | .5019 | 12109 | 24406 | 12297 | 12062 | 24500 | 12250 | 188 | .73  |
| 49000 | .55 | .45 | 14823 | 24255 | 9923  | .5482 | .4518 | 14664 | 24174 | 9963  | 14623 | 24255 | 9923  | 199 | .55  |
| 49000 | .60 | .40 | 17640 | 23520 | 7840  | .5983 | .4017 | 17465 | 23453 | 7873  | 17432 | 23520 | 7840  | 208 | .40  |
| 49000 | .65 | .35 | 20703 | 22295 | 6003  | .6485 | .3515 | 20515 | 22242 | 6029  | 20488 | 22295 | 6003  | 214 | .27  |
| 49000 | .70 | .30 | 24010 | 20580 | 4410  | .6987 | .3013 | 23813 | 20541 | 4430  | 23793 | 20580 | 4410  | 217 | .18  |
| 49000 | .75 | .25 | 27563 | 18375 | 3063  | .7489 | .2511 | 27361 | 18348 | 3076  | 27347 | 18375 | 3063  | 215 | .11  |
| 49000 | .80 | .20 | 31360 | 15680 | 1960  | .7991 | .2009 | 31160 | 15663 | 1968  | 31152 | 15680 | 1960  | 208 | .06  |
| 49000 | .85 | .15 | 35403 | 12495 | 1103  | .8494 | .1506 | 35213 | 12486 | 1107  | 35208 | 12495 | 1103  | 194 | .02  |
| 49000 | .90 | .10 | 39690 | 8820  | 490   | .8997 | .1003 | 39522 | 8817  | 492   | 39520 | 8820  | 490   | 170 | .01  |
| 49000 | .95 | .05 | 44223 | 4655  | 123   | .9499 | .0501 | 44094 | 4654  | 123   | 44094 | 4655  | 123   | 129 | .00  |
| 50000 | .05 | .95 | 125   | 4750  | 45125 | .0496 | .9504 | 123   | 4710  | 45145 | 103   | 4750  | 45125 | 22  | 3.52 |
| 50000 | .10 | .90 | 500   | 9000  | 40500 | .0992 | .9008 | 492   | 8929  | 40535 | 456   | 9000  | 40500 | 44  | 3.13 |
| 50000 | .15 | .85 | 1125  | 12750 | 36125 | .1489 | .8511 | 1107  | 12656 | 36172 | 1060  | 12750 | 36125 | 65  | 2.76 |
| 50000 | .20 | .80 | 2000  | 16000 | 32000 | .1986 | .8014 | 1969  | 15890 | 32055 | 1914  | 16000 | 32000 | 86  | 2.40 |
| 50000 | .25 | .75 | 3125  | 18750 | 28125 | .2484 | .7516 | 3079  | 18630 | 28185 | 3019  | 18750 | 28125 | 106 | 2.06 |
| 50000 | .30 | .70 | 4500  | 21000 | 24500 | .2982 | .7018 | 4436  | 20877 | 24562 | 4375  | 21000 | 24500 | 125 | 1.74 |
| 50000 | .35 | .65 | 6125  | 22750 | 21125 | .3481 | .6519 | 6042  | 22628 | 21186 | 5981  | 22750 | 21125 | 144 | 1.44 |
| 50000 | .40 | .60 | 8000  | 24000 | 18000 | .3981 | .6019 | 7897  | 23884 | 18058 | 7839  | 24000 | 18000 | 161 | 1.18 |
| 50000 | .45 | .55 | 10125 | 24750 | 15125 | .4481 | .5519 | 10002 | 24643 | 15178 | 9949  | 24750 | 15125 | 176 | .94  |
| 50000 | .50 | .50 | 12500 | 25000 | 12500 | .4981 | .5019 | 12358 | 24905 | 12548 | 12310 | 25000 | 12500 | 190 | .73  |
| 50000 | .55 | .45 | 15125 | 24750 | 10125 | .5482 | .4518 | 14965 | 24668 | 10166 | 14924 | 24750 | 10125 | 201 | .55  |
| 50000 | .60 | .40 | 18000 | 24000 | 8000  | .5983 | .4017 | 17823 | 23932 | 8034  | 17790 | 24000 | 8000  | 210 | .40  |
| 50000 | .65 | .35 | 21125 | 22750 | 6125  | .6485 | .3515 | 20935 | 22697 | 6152  | 20909 | 22750 | 6125  | 216 | .27  |
| 50000 | .70 | .30 | 24500 | 21000 | 4500  | .6987 | .3013 | 24301 | 20960 | 4520  | 24281 | 21000 | 4500  | 219 | .18  |
| 50000 | .75 | .25 | 28125 | 18750 | 3125  | .7489 | .2511 | 27921 | 18723 | 3139  | 27908 | 18750 | 3125  | 217 | .11  |
| 50000 | .80 | .20 | 32000 | 16000 | 2000  | .7992 | .2008 | 31798 | 15983 | 2008  | 31790 | 16000 | 2000  | 210 | .06  |
| 50000 | .85 | .15 | 36125 | 12750 | 1125  | .8494 | .1506 | 35933 | 12741 | 1129  | 35929 | 12750 | 1125  | 196 | .02  |

|       |     |     |       |       |       |       |       |       |       |       |       |       |       |     |      |
|-------|-----|-----|-------|-------|-------|-------|-------|-------|-------|-------|-------|-------|-------|-----|------|
| 50000 | .90 | .10 | 40500 | 9000  | 500   | .8997 | .1003 | 40330 | 8997  | 502   | 40328 | 9000  | 500   | 172 | .01  |
| 50000 | .95 | .05 | 45125 | 4750  | 125   | .9499 | .0501 | 44995 | 4749  | 125   | 44995 | 4750  | 125   | 130 | .00  |
| 51000 | .05 | .95 | 128   | 4845  | 46028 | .0496 | .9504 | 125   | 4805  | 46047 | 105   | 4845  | 46028 | 22  | 3.52 |
| 51000 | .10 | .90 | 510   | 9180  | 41310 | .0992 | .9008 | 502   | 9109  | 41346 | 466   | 9180  | 41310 | 44  | 3.13 |
| 51000 | .15 | .85 | 1148  | 13005 | 36848 | .1489 | .8511 | 1129  | 12910 | 36895 | 1082  | 13005 | 36848 | 66  | 2.76 |
| 51000 | .20 | .80 | 2040  | 16320 | 32640 | .1986 | .8014 | 2009  | 16209 | 32696 | 1953  | 16320 | 32640 | 87  | 2.40 |
| 51000 | .25 | .75 | 3188  | 19125 | 28688 | .2484 | .7516 | 3141  | 19004 | 28748 | 3080  | 19125 | 28688 | 107 | 2.06 |
| 51000 | .30 | .70 | 4590  | 21420 | 24990 | .2983 | .7017 | 4526  | 21296 | 25052 | 4463  | 21420 | 24990 | 127 | 1.74 |
| 51000 | .35 | .65 | 6248  | 23205 | 21548 | .3481 | .6519 | 6164  | 23082 | 21609 | 6102  | 23205 | 21548 | 145 | 1.44 |
| 51000 | .40 | .60 | 8160  | 24480 | 18360 | .3981 | .6019 | 8056  | 24363 | 18419 | 7998  | 24480 | 18360 | 162 | 1.18 |
| 51000 | .45 | .55 | 10328 | 25245 | 15428 | .4481 | .5519 | 10204 | 25137 | 15481 | 10150 | 25245 | 15428 | 178 | .94  |
| 51000 | .50 | .50 | 12750 | 25500 | 12750 | .4981 | .5019 | 12606 | 25404 | 12798 | 12558 | 25500 | 12750 | 192 | .73  |
| 51000 | .55 | .45 | 15428 | 25245 | 10328 | .5482 | .4518 | 15266 | 25162 | 10369 | 15224 | 25245 | 10328 | 203 | .55  |
| 51000 | .60 | .40 | 18360 | 24480 | 8160  | .5983 | .4017 | 18182 | 24412 | 8194  | 18148 | 24480 | 8160  | 212 | .40  |
| 51000 | .65 | .35 | 21548 | 23205 | 6248  | .6485 | .3515 | 21356 | 23151 | 6274  | 21329 | 23205 | 6248  | 219 | .27  |
| 51000 | .70 | .30 | 24990 | 21420 | 4590  | .6987 | .3013 | 24789 | 21380 | 4610  | 24769 | 21420 | 4590  | 221 | .18  |
| 51000 | .75 | .25 | 28688 | 19125 | 3188  | .7489 | .2511 | 28482 | 19097 | 3201  | 28468 | 19125 | 3188  | 220 | .11  |
| 51000 | .80 | .20 | 32640 | 16320 | 2040  | .7992 | .2008 | 32436 | 16303 | 2049  | 32428 | 16320 | 2040  | 212 | .06  |
| 51000 | .85 | .15 | 36848 | 13005 | 1148  | .8494 | .1506 | 36654 | 12996 | 1152  | 36649 | 13005 | 1148  | 198 | .02  |
| 51000 | .90 | .10 | 41310 | 9180  | 510   | .8997 | .1003 | 41138 | 9177  | 512   | 41136 | 9180  | 510   | 174 | .01  |
| 51000 | .95 | .05 | 46028 | 4845  | 128   | .9499 | .0501 | 45897 | 4844  | 128   | 45896 | 4845  | 128   | 131 | .00  |
| 52000 | .05 | .95 | 130   | 4940  | 46930 | .0496 | .9504 | 128   | 4900  | 46950 | 108   | 4940  | 46930 | 22  | 3.52 |
| 52000 | .10 | .90 | 520   | 9360  | 42120 | .0992 | .9008 | 512   | 9288  | 42156 | 476   | 9360  | 42120 | 44  | 3.13 |
| 52000 | .15 | .85 | 1170  | 13260 | 37570 | .1489 | .8511 | 1152  | 13164 | 37618 | 1104  | 13260 | 37570 | 66  | 2.76 |
| 52000 | .20 | .80 | 2080  | 16640 | 33280 | .1987 | .8013 | 2049  | 16528 | 33336 | 1992  | 16640 | 33280 | 88  | 2.40 |
| 52000 | .25 | .75 | 3250  | 19500 | 29250 | .2484 | .7516 | 3203  | 19378 | 29311 | 3142  | 19500 | 29250 | 108 | 2.06 |
| 52000 | .30 | .70 | 4680  | 21840 | 25480 | .2983 | .7017 | 4615  | 21714 | 25543 | 4552  | 21840 | 25480 | 128 | 1.74 |
| 52000 | .35 | .65 | 6370  | 23660 | 21970 | .3482 | .6518 | 6286  | 23536 | 22032 | 6223  | 23660 | 21970 | 147 | 1.44 |
| 52000 | .40 | .60 | 8320  | 24960 | 18720 | .3981 | .6019 | 8215  | 24842 | 18779 | 8156  | 24960 | 18720 | 164 | 1.18 |
| 52000 | .45 | .55 | 10530 | 25740 | 15730 | .4481 | .5519 | 10405 | 25631 | 15785 | 10350 | 25740 | 15730 | 180 | .94  |
| 52000 | .50 | .50 | 13000 | 26000 | 13000 | .4981 | .5019 | 12855 | 25903 | 13049 | 12806 | 26000 | 13000 | 194 | .73  |
| 52000 | .55 | .45 | 15730 | 25740 | 10530 | .5482 | .4518 | 15566 | 25657 | 10572 | 15525 | 25740 | 10530 | 205 | .55  |
| 52000 | .60 | .40 | 18720 | 24960 | 8320  | .5983 | .4017 | 18540 | 24891 | 8354  | 18505 | 24960 | 8320  | 215 | .40  |

|       |     |     |       |       |       |       |       |       |       |       |       |       |       |     |      |
|-------|-----|-----|-------|-------|-------|-------|-------|-------|-------|-------|-------|-------|-------|-----|------|
| 52000 | .65 | .35 | 21970 | 23660 | 6370  | .6485 | .3515 | 21776 | 23606 | 6397  | 21749 | 23660 | 6370  | 221 | .27  |
| 52000 | .70 | .30 | 25480 | 21840 | 4680  | .6987 | .3013 | 25277 | 21800 | 4700  | 25257 | 21840 | 4680  | 223 | .18  |
| 52000 | .75 | .25 | 29250 | 19500 | 3250  | .7489 | .2511 | 29042 | 19472 | 3264  | 29028 | 19500 | 3250  | 222 | .11  |
| 52000 | .80 | .20 | 33280 | 16640 | 2080  | .7992 | .2008 | 33074 | 16623 | 2089  | 33065 | 16640 | 2080  | 215 | .06  |
| 52000 | .85 | .15 | 37570 | 13260 | 1170  | .8494 | .1506 | 37374 | 13251 | 1175  | 37370 | 13260 | 1170  | 200 | .02  |
| 52000 | .90 | .10 | 42120 | 9360  | 520   | .8997 | .1003 | 41946 | 9356  | 522   | 41945 | 9360  | 520   | 175 | .01  |
| 52000 | .95 | .05 | 46930 | 4940  | 130   | .9499 | .0501 | 46798 | 4939  | 130   | 46797 | 4940  | 130   | 133 | .00  |
| 53000 | .05 | .95 | 133   | 5035  | 47833 | .0496 | .9504 | 130   | 4994  | 47853 | 110   | 5035  | 47833 | 23  | 3.52 |
| 53000 | .10 | .90 | 530   | 9540  | 42930 | .0992 | .9008 | 522   | 9467  | 42966 | 485   | 9540  | 42930 | 45  | 3.13 |
| 53000 | .15 | .85 | 1193  | 13515 | 38293 | .1489 | .8511 | 1174  | 13418 | 38341 | 1126  | 13515 | 38293 | 67  | 2.76 |
| 53000 | .20 | .80 | 2120  | 16960 | 33920 | .1987 | .8013 | 2088  | 16847 | 33977 | 2032  | 16960 | 33920 | 88  | 2.40 |
| 53000 | .25 | .75 | 3313  | 19875 | 29813 | .2485 | .7515 | 3265  | 19752 | 29874 | 3203  | 19875 | 29813 | 109 | 2.06 |
| 53000 | .30 | .70 | 4770  | 22260 | 25970 | .2983 | .7017 | 4704  | 22133 | 26033 | 4641  | 22260 | 25970 | 129 | 1.74 |
| 53000 | .35 | .65 | 6493  | 24115 | 22393 | .3482 | .6518 | 6407  | 23990 | 22455 | 6345  | 24115 | 22393 | 148 | 1.44 |
| 53000 | .40 | .60 | 8480  | 25440 | 19080 | .3981 | .6019 | 8374  | 25321 | 19140 | 8315  | 25440 | 19080 | 165 | 1.18 |
| 53000 | .45 | .55 | 10733 | 26235 | 16033 | .4481 | .5519 | 10606 | 26125 | 16088 | 10551 | 26235 | 16033 | 181 | .94  |
| 53000 | .50 | .50 | 13250 | 26500 | 13250 | .4981 | .5019 | 13104 | 26402 | 13299 | 13055 | 26500 | 13250 | 195 | .73  |
| 53000 | .55 | .45 | 16033 | 26235 | 10733 | .5482 | .4518 | 15867 | 26151 | 10775 | 15825 | 26235 | 10733 | 207 | .55  |
| 53000 | .60 | .40 | 19080 | 25440 | 8480  | .5984 | .4016 | 18898 | 25370 | 8515  | 18863 | 25440 | 8480  | 217 | .40  |
| 53000 | .65 | .35 | 22393 | 24115 | 6493  | .6485 | .3515 | 22197 | 24060 | 6520  | 22170 | 24115 | 6493  | 223 | .27  |
| 53000 | .70 | .30 | 25970 | 22260 | 4770  | .6987 | .3013 | 25765 | 22219 | 4790  | 25744 | 22260 | 4770  | 226 | .18  |
| 53000 | .75 | .25 | 29813 | 19875 | 3313  | .7489 | .2511 | 29603 | 19847 | 3327  | 29589 | 19875 | 3313  | 224 | .11  |
| 53000 | .80 | .20 | 33920 | 16960 | 2120  | .7992 | .2008 | 33712 | 16943 | 2129  | 33703 | 16960 | 2120  | 217 | .06  |
| 53000 | .85 | .15 | 38293 | 13515 | 1193  | .8494 | .1506 | 38095 | 13506 | 1197  | 38090 | 13515 | 1193  | 202 | .02  |
| 53000 | .90 | .10 | 42930 | 9540  | 530   | .8997 | .1003 | 42755 | 9536  | 532   | 42753 | 9540  | 530   | 177 | .01  |
| 53000 | .95 | .05 | 47833 | 5035  | 133   | .9499 | .0501 | 47699 | 5034  | 133   | 47699 | 5035  | 133   | 134 | .00  |
| 54000 | .05 | .95 | 135   | 5130  | 48735 | .0496 | .9504 | 133   | 5089  | 48756 | 112   | 5130  | 48735 | 23  | 3.52 |
| 54000 | .10 | .90 | 540   | 9720  | 43740 | .0992 | .9008 | 531   | 9647  | 43777 | 495   | 9720  | 43740 | 45  | 3.13 |
| 54000 | .15 | .85 | 1215  | 13770 | 39015 | .1489 | .8511 | 1196  | 13672 | 39064 | 1147  | 13770 | 39015 | 68  | 2.76 |
| 54000 | .20 | .80 | 2160  | 17280 | 34560 | .1987 | .8013 | 2128  | 17166 | 34617 | 2071  | 17280 | 34560 | 89  | 2.40 |
| 54000 | .25 | .75 | 3375  | 20250 | 30375 | .2485 | .7515 | 3327  | 20126 | 30437 | 3265  | 20250 | 30375 | 110 | 2.06 |
| 54000 | .30 | .70 | 4860  | 22680 | 26460 | .2983 | .7017 | 4794  | 22552 | 26524 | 4730  | 22680 | 26460 | 130 | 1.74 |
| 54000 | .35 | .65 | 6615  | 24570 | 22815 | .3482 | .6518 | 6529  | 24443 | 22878 | 6466  | 24570 | 22815 | 149 | 1.44 |

|       |     |     |       |       |       |       |       |       |       |       |       |       |       |     |      |
|-------|-----|-----|-------|-------|-------|-------|-------|-------|-------|-------|-------|-------|-------|-----|------|
| 54000 | .40 | .60 | 8640  | 25920 | 19440 | .3981 | .6019 | 8533  | 25799 | 19500 | 8473  | 25920 | 19440 | 167 | 1.18 |
| 54000 | .45 | .55 | 10935 | 26730 | 16335 | .4481 | .5519 | 10808 | 26619 | 16391 | 10752 | 26730 | 16335 | 183 | .94  |
| 54000 | .50 | .50 | 13500 | 27000 | 13500 | .4982 | .5018 | 13352 | 26901 | 13549 | 13303 | 27000 | 13500 | 197 | .73  |
| 54000 | .55 | .45 | 16335 | 26730 | 10935 | .5482 | .4518 | 16168 | 26645 | 10978 | 16126 | 26730 | 10935 | 209 | .55  |
| 54000 | .60 | .40 | 19440 | 25920 | 8640  | .5984 | .4016 | 19256 | 25850 | 8675  | 19221 | 25920 | 8640  | 219 | .40  |
| 54000 | .65 | .35 | 22815 | 24570 | 6615  | .6485 | .3515 | 22618 | 24515 | 6643  | 22590 | 24570 | 6615  | 225 | .27  |
| 54000 | .70 | .30 | 26460 | 22680 | 4860  | .6987 | .3013 | 26253 | 22639 | 4881  | 26232 | 22680 | 4860  | 228 | .18  |
| 54000 | .75 | .25 | 30375 | 20250 | 3375  | .7489 | .2511 | 30163 | 20222 | 3389  | 30149 | 20250 | 3375  | 226 | .11  |
| 54000 | .80 | .20 | 34560 | 17280 | 2160  | .7992 | .2008 | 34350 | 17262 | 2169  | 34341 | 17280 | 2160  | 219 | .06  |
| 54000 | .85 | .15 | 39015 | 13770 | 1215  | .8494 | .1506 | 38816 | 13761 | 1220  | 38811 | 13770 | 1215  | 204 | .02  |
| 54000 | .90 | .10 | 43740 | 9720  | 540   | .8997 | .1003 | 43563 | 9716  | 542   | 43561 | 9720  | 540   | 179 | .01  |
| 54000 | .95 | .05 | 48735 | 5130  | 135   | .9499 | .0501 | 48600 | 5129  | 135   | 48600 | 5130  | 135   | 135 | .00  |
| 55000 | .05 | .95 | 138   | 5225  | 49638 | .0496 | .9504 | 135   | 5184  | 49658 | 115   | 5225  | 49638 | 23  | 3.52 |
| 55000 | .10 | .90 | 550   | 9900  | 44550 | .0993 | .9007 | 541   | 9826  | 44587 | 504   | 9900  | 44550 | 46  | 3.13 |
| 55000 | .15 | .85 | 1238  | 14025 | 39738 | .1489 | .8511 | 1219  | 13926 | 39787 | 1169  | 14025 | 39738 | 68  | 2.76 |
| 55000 | .20 | .80 | 2200  | 17600 | 35200 | .1987 | .8013 | 2168  | 17485 | 35258 | 2110  | 17600 | 35200 | 90  | 2.40 |
| 55000 | .25 | .75 | 3438  | 20625 | 30938 | .2485 | .7515 | 3389  | 20500 | 31000 | 3326  | 20625 | 30938 | 111 | 2.05 |
| 55000 | .30 | .70 | 4950  | 23100 | 26950 | .2983 | .7017 | 4883  | 22971 | 27015 | 4818  | 23100 | 26950 | 132 | 1.74 |
| 55000 | .35 | .65 | 6738  | 25025 | 23238 | .3482 | .6518 | 6651  | 24897 | 23301 | 6587  | 25025 | 23238 | 151 | 1.44 |
| 55000 | .40 | .60 | 8800  | 26400 | 19800 | .3982 | .6018 | 8692  | 26278 | 19861 | 8631  | 26400 | 19800 | 169 | 1.18 |
| 55000 | .45 | .55 | 11138 | 27225 | 16638 | .4481 | .5519 | 11009 | 27113 | 16694 | 10953 | 27225 | 16638 | 185 | .94  |
| 55000 | .50 | .50 | 13750 | 27500 | 13750 | .4982 | .5018 | 13601 | 27400 | 13800 | 13551 | 27500 | 13750 | 199 | .73  |
| 55000 | .55 | .45 | 16638 | 27225 | 11138 | .5483 | .4517 | 16469 | 27139 | 11180 | 16426 | 27225 | 11138 | 211 | .55  |
| 55000 | .60 | .40 | 19800 | 26400 | 8800  | .5984 | .4016 | 19615 | 26329 | 8835  | 19579 | 26400 | 8800  | 221 | .40  |
| 55000 | .65 | .35 | 23238 | 25025 | 6738  | .6485 | .3515 | 23038 | 24969 | 6765  | 23010 | 25025 | 6738  | 227 | .27  |
| 55000 | .70 | .30 | 26950 | 23100 | 4950  | .6987 | .3013 | 26741 | 23058 | 4971  | 26720 | 23100 | 4950  | 230 | .18  |
| 55000 | .75 | .25 | 30938 | 20625 | 3438  | .7490 | .2510 | 30724 | 20596 | 3452  | 30709 | 20625 | 3438  | 228 | .11  |
| 55000 | .80 | .20 | 35200 | 17600 | 2200  | .7992 | .2008 | 34988 | 17582 | 2209  | 34979 | 17600 | 2200  | 221 | .06  |
| 55000 | .85 | .15 | 39738 | 14025 | 1238  | .8494 | .1506 | 39536 | 14016 | 1242  | 39532 | 14025 | 1238  | 206 | .02  |
| 55000 | .90 | .10 | 44550 | 9900  | 550   | .8997 | .1003 | 44371 | 9896  | 552   | 44370 | 9900  | 550   | 180 | .01  |
| 55000 | .95 | .05 | 49638 | 5225  | 138   | .9499 | .0501 | 49501 | 5224  | 138   | 49501 | 5225  | 138   | 136 | .00  |
| 56000 | .05 | .95 | 140   | 5320  | 50540 | .0496 | .9504 | 138   | 5278  | 50561 | 117   | 5320  | 50540 | 23  | 3.51 |
| 56000 | .10 | .90 | 560   | 10080 | 45360 | .0993 | .9007 | 551   | 10005 | 45397 | 514   | 10080 | 45360 | 46  | 3.13 |



|       |     |     |       |       |       |       |       |       |       |       |       |       |       |     |      |
|-------|-----|-----|-------|-------|-------|-------|-------|-------|-------|-------|-------|-------|-------|-----|------|
| 56000 | .15 | .85 | 1260  | 14280 | 40460 | .1490 | .8510 | 1241  | 14180 | 40510 | 1191  | 14280 | 40460 | 69  | 2.75 |
| 56000 | .20 | .80 | 2240  | 17920 | 35840 | .1987 | .8013 | 2207  | 17803 | 35898 | 2149  | 17920 | 35840 | 91  | 2.40 |
| 56000 | .25 | .75 | 3500  | 21000 | 31500 | .2485 | .7515 | 3451  | 20873 | 31563 | 3388  | 21000 | 31500 | 112 | 2.05 |
| 56000 | .30 | .70 | 5040  | 23520 | 27440 | .2983 | .7017 | 4972  | 23390 | 27505 | 4907  | 23520 | 27440 | 133 | 1.74 |
| 56000 | .35 | .65 | 6860  | 25480 | 23660 | .3482 | .6518 | 6772  | 25351 | 23724 | 6708  | 25480 | 23660 | 152 | 1.44 |
| 56000 | .40 | .60 | 8960  | 26880 | 20160 | .3982 | .6018 | 8851  | 26757 | 20221 | 8790  | 26880 | 20160 | 170 | 1.18 |
| 56000 | .45 | .55 | 11340 | 27720 | 16940 | .4482 | .5518 | 11210 | 27607 | 16997 | 11154 | 27720 | 16940 | 186 | .94  |
| 56000 | .50 | .50 | 14000 | 28000 | 14000 | .4982 | .5018 | 13850 | 27899 | 14050 | 13799 | 28000 | 14000 | 201 | .73  |
| 56000 | .55 | .45 | 16940 | 27720 | 11340 | .5483 | .4517 | 16770 | 27633 | 11383 | 16727 | 27720 | 11340 | 213 | .55  |
| 56000 | .60 | .40 | 20160 | 26880 | 8960  | .5984 | .4016 | 19973 | 26808 | 8996  | 19937 | 26880 | 8960  | 223 | .40  |
| 56000 | .65 | .35 | 23660 | 25480 | 6860  | .6486 | .3514 | 23459 | 25424 | 6888  | 23431 | 25480 | 6860  | 229 | .27  |
| 56000 | .70 | .30 | 27440 | 23520 | 5040  | .6988 | .3012 | 27229 | 23478 | 5061  | 27208 | 23520 | 5040  | 232 | .18  |
| 56000 | .75 | .25 | 31500 | 21000 | 3500  | .7490 | .2510 | 31284 | 20971 | 3514  | 31270 | 21000 | 3500  | 230 | .11  |
| 56000 | .80 | .20 | 35840 | 17920 | 2240  | .7992 | .2008 | 35626 | 17902 | 2249  | 35617 | 17920 | 2240  | 223 | .06  |
| 56000 | .85 | .15 | 40460 | 14280 | 1260  | .8494 | .1506 | 40257 | 14271 | 1265  | 40252 | 14280 | 1260  | 208 | .02  |
| 56000 | .90 | .10 | 45360 | 10080 | 560   | .8997 | .1003 | 45180 | 10076 | 562   | 45178 | 10080 | 560   | 182 | .01  |
| 56000 | .95 | .05 | 50540 | 5320  | 140   | .9499 | .0501 | 50403 | 5319  | 140   | 50402 | 5320  | 140   | 138 | .00  |
| 57000 | .05 | .95 | 143   | 5415  | 51443 | .0496 | .9504 | 140   | 5373  | 51464 | 119   | 5415  | 51443 | 23  | 3.51 |
| 57000 | .10 | .90 | 570   | 10260 | 46170 | .0993 | .9007 | 561   | 10185 | 46208 | 523   | 10260 | 46170 | 47  | 3.13 |
| 57000 | .15 | .85 | 1283  | 14535 | 41183 | .1490 | .8510 | 1263  | 14435 | 41233 | 1213  | 14535 | 41183 | 69  | 2.75 |
| 57000 | .20 | .80 | 2280  | 18240 | 36480 | .1987 | .8013 | 2247  | 18122 | 36539 | 2188  | 18240 | 36480 | 92  | 2.39 |
| 57000 | .25 | .75 | 3563  | 21375 | 32063 | .2485 | .7515 | 3513  | 21247 | 32126 | 3449  | 21375 | 32063 | 113 | 2.05 |
| 57000 | .30 | .70 | 5130  | 23940 | 27930 | .2984 | .7016 | 5062  | 23808 | 27996 | 4996  | 23940 | 27930 | 134 | 1.74 |
| 57000 | .35 | .65 | 6983  | 25935 | 24083 | .3482 | .6518 | 6894  | 25805 | 24147 | 6829  | 25935 | 24083 | 153 | 1.44 |
| 57000 | .40 | .60 | 9120  | 27360 | 20520 | .3982 | .6018 | 9010  | 27236 | 20582 | 8948  | 27360 | 20520 | 172 | 1.18 |
| 57000 | .45 | .55 | 11543 | 28215 | 17243 | .4482 | .5518 | 11412 | 28101 | 17300 | 11354 | 28215 | 17243 | 188 | .94  |
| 57000 | .50 | .50 | 14250 | 28500 | 14250 | .4982 | .5018 | 14098 | 28398 | 14301 | 14047 | 28500 | 14250 | 203 | .73  |
| 57000 | .55 | .45 | 17243 | 28215 | 11543 | .5483 | .4517 | 17071 | 28128 | 11586 | 17028 | 28215 | 11543 | 215 | .55  |
| 57000 | .60 | .40 | 20520 | 27360 | 9120  | .5984 | .4016 | 20331 | 27288 | 9156  | 20295 | 27360 | 9120  | 225 | .40  |
| 57000 | .65 | .35 | 24083 | 25935 | 6983  | .6486 | .3514 | 23880 | 25878 | 7011  | 23851 | 25935 | 6983  | 231 | .27  |
| 57000 | .70 | .30 | 27930 | 23940 | 5130  | .6988 | .3012 | 27717 | 23898 | 5151  | 27696 | 23940 | 5130  | 234 | .18  |
| 57000 | .75 | .25 | 32063 | 21375 | 3563  | .7490 | .2510 | 31845 | 21346 | 3577  | 31830 | 21375 | 3563  | 232 | .11  |
| 57000 | .80 | .20 | 36480 | 18240 | 2280  | .7992 | .2008 | 36264 | 18222 | 2289  | 36255 | 18240 | 2280  | 225 | .06  |

|       |     |     |       |       |       |       |       |       |       |       |       |       |       |     |      |
|-------|-----|-----|-------|-------|-------|-------|-------|-------|-------|-------|-------|-------|-------|-----|------|
| 57000 | .85 | .15 | 41183 | 14535 | 1283  | .8494 | .1506 | 40978 | 14526 | 1287  | 40973 | 14535 | 1283  | 210 | .02  |
| 57000 | .90 | .10 | 46170 | 10260 | 570   | .8997 | .1003 | 45988 | 10256 | 572   | 45986 | 10260 | 570   | 184 | .01  |
| 57000 | .95 | .05 | 51443 | 5415  | 143   | .9499 | .0501 | 51304 | 5414  | 143   | 51304 | 5415  | 143   | 139 | .00  |
| 58000 | .05 | .95 | 145   | 5510  | 52345 | .0496 | .9504 | 143   | 5467  | 52366 | 121   | 5510  | 52345 | 24  | 3.51 |
| 58000 | .10 | .90 | 580   | 10440 | 46980 | .0993 | .9007 | 571   | 10364 | 47018 | 533   | 10440 | 46980 | 47  | 3.13 |
| 58000 | .15 | .85 | 1305  | 14790 | 41905 | .1490 | .8510 | 1286  | 14689 | 41956 | 1235  | 14790 | 41905 | 70  | 2.75 |
| 58000 | .20 | .80 | 2320  | 18560 | 37120 | .1987 | .8013 | 2287  | 18441 | 37179 | 2228  | 18560 | 37120 | 92  | 2.39 |
| 58000 | .25 | .75 | 3625  | 21750 | 32625 | .2485 | .7515 | 3575  | 21621 | 32689 | 3511  | 21750 | 32625 | 114 | 2.05 |
| 58000 | .30 | .70 | 5220  | 24360 | 28420 | .2984 | .7016 | 5151  | 24227 | 28486 | 5085  | 24360 | 28420 | 135 | 1.74 |
| 58000 | .35 | .65 | 7105  | 26390 | 24505 | .3483 | .6517 | 7016  | 26259 | 24571 | 6950  | 26390 | 24505 | 155 | 1.44 |
| 58000 | .40 | .60 | 9280  | 27840 | 20880 | .3982 | .6018 | 9169  | 27715 | 20942 | 9107  | 27840 | 20880 | 173 | 1.18 |
| 58000 | .45 | .55 | 11745 | 28710 | 17545 | .4482 | .5518 | 11613 | 28595 | 17603 | 11555 | 28710 | 17545 | 190 | .94  |
| 58000 | .50 | .50 | 14500 | 29000 | 14500 | .4982 | .5018 | 14347 | 28897 | 14551 | 14296 | 29000 | 14500 | 204 | .73  |
| 58000 | .55 | .45 | 17545 | 28710 | 11745 | .5483 | .4517 | 17372 | 28622 | 11789 | 17328 | 28710 | 11745 | 217 | .55  |
| 58000 | .60 | .40 | 20880 | 27840 | 9280  | .5984 | .4016 | 20690 | 27767 | 9316  | 20653 | 27840 | 9280  | 227 | .40  |
| 58000 | .65 | .35 | 24505 | 26390 | 7105  | .6486 | .3514 | 24301 | 26333 | 7134  | 24272 | 26390 | 7105  | 233 | .27  |
| 58000 | .70 | .30 | 28420 | 24360 | 5220  | .6988 | .3012 | 28205 | 24317 | 5241  | 28184 | 24360 | 5220  | 236 | .18  |
| 58000 | .75 | .25 | 32625 | 21750 | 3625  | .7490 | .2510 | 32406 | 21721 | 3640  | 32391 | 21750 | 3625  | 234 | .11  |
| 58000 | .80 | .20 | 37120 | 18560 | 2320  | .7992 | .2008 | 36903 | 18542 | 2329  | 36893 | 18560 | 2320  | 227 | .06  |
| 58000 | .85 | .15 | 41905 | 14790 | 1305  | .8495 | .1505 | 41698 | 14780 | 1310  | 41694 | 14790 | 1305  | 211 | .02  |
| 58000 | .90 | .10 | 46980 | 10440 | 580   | .8997 | .1003 | 46797 | 10436 | 582   | 46795 | 10440 | 580   | 185 | .01  |
| 58000 | .95 | .05 | 52345 | 5510  | 145   | .9499 | .0501 | 52205 | 5509  | 145   | 52205 | 5510  | 145   | 140 | .00  |
| 59000 | .05 | .95 | 148   | 5605  | 53248 | .0496 | .9504 | 145   | 5562  | 53269 | 124   | 5605  | 53248 | 24  | 3.51 |
| 59000 | .10 | .90 | 590   | 10620 | 47790 | .0993 | .9007 | 581   | 10543 | 47828 | 543   | 10620 | 47790 | 47  | 3.13 |
| 59000 | .15 | .85 | 1328  | 15045 | 42628 | .1490 | .8510 | 1308  | 14943 | 42679 | 1257  | 15045 | 42628 | 71  | 2.75 |
| 59000 | .20 | .80 | 2360  | 18880 | 37760 | .1987 | .8013 | 2327  | 18760 | 37820 | 2267  | 18880 | 37760 | 93  | 2.39 |
| 59000 | .25 | .75 | 3688  | 22125 | 33188 | .2485 | .7515 | 3637  | 21995 | 33252 | 3572  | 22125 | 33188 | 115 | 2.05 |
| 59000 | .30 | .70 | 5310  | 24780 | 28910 | .2984 | .7016 | 5241  | 24646 | 28977 | 5174  | 24780 | 28910 | 136 | 1.74 |
| 59000 | .35 | .65 | 7228  | 26845 | 24928 | .3483 | .6517 | 7138  | 26713 | 24994 | 7071  | 26845 | 24928 | 156 | 1.44 |
| 59000 | .40 | .60 | 9440  | 28320 | 21240 | .3982 | .6018 | 9328  | 28194 | 21303 | 9265  | 28320 | 21240 | 175 | 1.18 |
| 59000 | .45 | .55 | 11948 | 29205 | 17848 | .4482 | .5518 | 11814 | 29089 | 17906 | 11756 | 29205 | 17848 | 191 | .94  |
| 59000 | .50 | .50 | 14750 | 29500 | 14750 | .4982 | .5018 | 14596 | 29397 | 14802 | 14544 | 29500 | 14750 | 206 | .73  |
| 59000 | .55 | .45 | 17848 | 29205 | 11948 | .5483 | .4517 | 17673 | 29116 | 11992 | 17629 | 29205 | 11948 | 219 | .55  |

|       |     |     |       |       |       |       |       |       |       |       |       |       |       |     |      |
|-------|-----|-----|-------|-------|-------|-------|-------|-------|-------|-------|-------|-------|-------|-----|------|
| 59000 | .60 | .40 | 21240 | 28320 | 9440  | .5984 | .4016 | 21048 | 28247 | 9477  | 21011 | 28320 | 9440  | 229 | .40  |
| 59000 | .65 | .35 | 24928 | 26845 | 7228  | .6486 | .3514 | 24721 | 26787 | 7256  | 24692 | 26845 | 7228  | 235 | .27  |
| 59000 | .70 | .30 | 28910 | 24780 | 5310  | .6988 | .3012 | 28694 | 24737 | 5332  | 28672 | 24780 | 5310  | 238 | .18  |
| 59000 | .75 | .25 | 33188 | 22125 | 3688  | .7490 | .2510 | 32966 | 22095 | 3702  | 32951 | 22125 | 3688  | 236 | .11  |
| 59000 | .80 | .20 | 37760 | 18880 | 2360  | .7992 | .2008 | 37541 | 18862 | 2369  | 37531 | 18880 | 2360  | 229 | .06  |
| 59000 | .85 | .15 | 42628 | 15045 | 1328  | .8495 | .1505 | 42419 | 15035 | 1332  | 42414 | 15045 | 1328  | 213 | .02  |
| 59000 | .90 | .10 | 47790 | 10620 | 590   | .8997 | .1003 | 47605 | 10616 | 592   | 47603 | 10620 | 590   | 187 | .01  |
| 59000 | .95 | .05 | 53248 | 5605  | 148   | .9499 | .0501 | 53107 | 5604  | 148   | 53106 | 5605  | 148   | 141 | .00  |
| 60000 | .05 | .95 | 150   | 5700  | 54150 | .0496 | .9504 | 148   | 5657  | 54172 | 126   | 5700  | 54150 | 24  | 3.51 |
| 60000 | .10 | .90 | 600   | 10800 | 48600 | .0993 | .9007 | 591   | 10723 | 48639 | 552   | 10800 | 48600 | 48  | 3.13 |
| 60000 | .15 | .85 | 1350  | 15300 | 43350 | .1490 | .8510 | 1330  | 15197 | 43402 | 1279  | 15300 | 43350 | 71  | 2.75 |
| 60000 | .20 | .80 | 2400  | 19200 | 38400 | .1987 | .8013 | 2366  | 19079 | 38460 | 2306  | 19200 | 38400 | 94  | 2.39 |
| 60000 | .25 | .75 | 3750  | 22500 | 33750 | .2485 | .7515 | 3699  | 22369 | 33815 | 3634  | 22500 | 33750 | 116 | 2.05 |
| 60000 | .30 | .70 | 5400  | 25200 | 29400 | .2984 | .7016 | 5330  | 25065 | 29467 | 5263  | 25200 | 29400 | 137 | 1.74 |
| 60000 | .35 | .65 | 7350  | 27300 | 25350 | .3483 | .6517 | 7259  | 27167 | 25417 | 7193  | 27300 | 25350 | 157 | 1.44 |
| 60000 | .40 | .60 | 9600  | 28800 | 21600 | .3982 | .6018 | 9488  | 28673 | 21664 | 9424  | 28800 | 21600 | 176 | 1.18 |
| 60000 | .45 | .55 | 12150 | 29700 | 18150 | .4482 | .5518 | 12016 | 29583 | 18209 | 11957 | 29700 | 18150 | 193 | .94  |
| 60000 | .50 | .50 | 15000 | 30000 | 15000 | .4983 | .5017 | 14844 | 29896 | 15052 | 14792 | 30000 | 15000 | 208 | .73  |
| 60000 | .55 | .45 | 18150 | 29700 | 12150 | .5483 | .4517 | 17974 | 29610 | 12195 | 17929 | 29700 | 12150 | 221 | .55  |
| 60000 | .60 | .40 | 21600 | 28800 | 9600  | .5985 | .4015 | 21407 | 28726 | 9637  | 21370 | 28800 | 9600  | 230 | .40  |
| 60000 | .65 | .35 | 25350 | 27300 | 7350  | .6486 | .3514 | 25142 | 27242 | 7379  | 25113 | 27300 | 7350  | 237 | .27  |
| 60000 | .70 | .30 | 29400 | 25200 | 5400  | .6988 | .3012 | 29182 | 25157 | 5422  | 29160 | 25200 | 5400  | 240 | .18  |
| 60000 | .75 | .25 | 33750 | 22500 | 3750  | .7490 | .2510 | 33527 | 22470 | 3765  | 33512 | 22500 | 3750  | 238 | .11  |
| 60000 | .80 | .20 | 38400 | 19200 | 2400  | .7992 | .2008 | 38179 | 19181 | 2409  | 38170 | 19200 | 2400  | 230 | .06  |
| 60000 | .85 | .15 | 43350 | 15300 | 1350  | .8495 | .1505 | 43140 | 15290 | 1355  | 43135 | 15300 | 1350  | 215 | .02  |
| 60000 | .90 | .10 | 48600 | 10800 | 600   | .8997 | .1003 | 48414 | 10796 | 602   | 48412 | 10800 | 600   | 188 | .01  |
| 60000 | .95 | .05 | 54150 | 5700  | 150   | .9499 | .0501 | 54008 | 5699  | 150   | 54008 | 5700  | 150   | 142 | .00  |
| 61000 | .05 | .95 | 153   | 5795  | 55053 | .0496 | .9504 | 150   | 5751  | 55074 | 128   | 5795  | 55053 | 24  | 3.51 |
| 61000 | .10 | .90 | 610   | 10980 | 49410 | .0993 | .9007 | 601   | 10902 | 49449 | 562   | 10980 | 49410 | 48  | 3.13 |
| 61000 | .15 | .85 | 1373  | 15555 | 44073 | .1490 | .8510 | 1353  | 15451 | 44124 | 1301  | 15555 | 44073 | 72  | 2.75 |
| 61000 | .20 | .80 | 2440  | 19520 | 39040 | .1988 | .8012 | 2406  | 19398 | 39101 | 2345  | 19520 | 39040 | 95  | 2.39 |
| 61000 | .25 | .75 | 3813  | 22875 | 34313 | .2486 | .7514 | 3761  | 22743 | 34379 | 3695  | 22875 | 34313 | 117 | 2.05 |
| 61000 | .30 | .70 | 5490  | 25620 | 29890 | .2984 | .7016 | 5420  | 25484 | 29958 | 5351  | 25620 | 29890 | 139 | 1.74 |

|       |     |     |       |       |       |       |       |       |       |       |       |       |       |     |      |
|-------|-----|-----|-------|-------|-------|-------|-------|-------|-------|-------|-------|-------|-------|-----|------|
| 61000 | .35 | .65 | 7473  | 27755 | 25773 | .3483 | .6517 | 7381  | 27621 | 25840 | 7314  | 27755 | 25773 | 159 | 1.44 |
| 61000 | .40 | .60 | 9760  | 29280 | 21960 | .3982 | .6018 | 9647  | 29152 | 22024 | 9583  | 29280 | 21960 | 177 | 1.18 |
| 61000 | .45 | .55 | 12353 | 30195 | 18453 | .4482 | .5518 | 12217 | 30077 | 18512 | 12158 | 30195 | 18453 | 195 | .94  |
| 61000 | .50 | .50 | 15250 | 30500 | 15250 | .4983 | .5017 | 15093 | 30395 | 15303 | 15040 | 30500 | 15250 | 210 | .73  |
| 61000 | .55 | .45 | 18453 | 30195 | 12353 | .5484 | .4516 | 18275 | 30105 | 12398 | 18230 | 30195 | 12353 | 222 | .55  |
| 61000 | .60 | .40 | 21960 | 29280 | 9760  | .5985 | .4015 | 21765 | 29205 | 9797  | 21728 | 29280 | 9760  | 232 | .40  |
| 61000 | .65 | .35 | 25773 | 27755 | 7473  | .6486 | .3514 | 25563 | 27696 | 7502  | 25533 | 27755 | 7473  | 239 | .27  |
| 61000 | .70 | .30 | 29890 | 25620 | 5490  | .6988 | .3012 | 29670 | 25576 | 5512  | 29648 | 25620 | 5490  | 242 | .18  |
| 61000 | .75 | .25 | 34313 | 22875 | 3813  | .7490 | .2510 | 34087 | 22845 | 3828  | 34072 | 22875 | 3813  | 240 | .11  |
| 61000 | .80 | .20 | 39040 | 19520 | 2440  | .7992 | .2008 | 38817 | 19501 | 2449  | 38808 | 19520 | 2440  | 232 | .06  |
| 61000 | .85 | .15 | 44073 | 15555 | 1373  | .8495 | .1505 | 43861 | 15545 | 1377  | 43856 | 15555 | 1373  | 217 | .02  |
| 61000 | .90 | .10 | 49410 | 10980 | 610   | .8997 | .1003 | 49222 | 10976 | 612   | 49220 | 10980 | 610   | 190 | .01  |
| 61000 | .95 | .05 | 55053 | 5795  | 153   | .9499 | .0501 | 54909 | 5794  | 153   | 54909 | 5795  | 153   | 144 | .00  |
| 62000 | .05 | .95 | 155   | 5890  | 55955 | .0496 | .9504 | 153   | 5846  | 55977 | 131   | 5890  | 55955 | 24  | 3.51 |
| 62000 | .10 | .90 | 620   | 11160 | 50220 | .0993 | .9007 | 611   | 11081 | 50259 | 571   | 11160 | 50220 | 49  | 3.13 |
| 62000 | .15 | .85 | 1395  | 15810 | 44795 | .1490 | .8510 | 1375  | 15705 | 44847 | 1323  | 15810 | 44795 | 72  | 2.75 |
| 62000 | .20 | .80 | 2480  | 19840 | 39680 | .1988 | .8012 | 2446  | 19717 | 39741 | 2384  | 19840 | 39680 | 96  | 2.39 |
| 62000 | .25 | .75 | 3875  | 23250 | 34875 | .2486 | .7514 | 3823  | 23117 | 34942 | 3757  | 23250 | 34875 | 118 | 2.05 |
| 62000 | .30 | .70 | 5580  | 26040 | 30380 | .2984 | .7016 | 5509  | 25903 | 30449 | 5440  | 26040 | 30380 | 140 | 1.74 |
| 62000 | .35 | .65 | 7595  | 28210 | 26195 | .3483 | .6517 | 7503  | 28074 | 26263 | 7435  | 28210 | 26195 | 160 | 1.44 |
| 62000 | .40 | .60 | 9920  | 29760 | 22320 | .3983 | .6017 | 9806  | 29631 | 22385 | 9741  | 29760 | 22320 | 179 | 1.18 |
| 62000 | .45 | .55 | 12555 | 30690 | 18755 | .4483 | .5517 | 12418 | 30571 | 18815 | 12359 | 30690 | 18755 | 196 | .94  |
| 62000 | .50 | .50 | 15500 | 31000 | 15500 | .4983 | .5017 | 15342 | 30894 | 15553 | 15289 | 31000 | 15500 | 211 | .73  |
| 62000 | .55 | .45 | 18755 | 30690 | 12555 | .5484 | .4516 | 18576 | 30599 | 12601 | 18531 | 30690 | 12555 | 224 | .55  |
| 62000 | .60 | .40 | 22320 | 29760 | 9920  | .5985 | .4015 | 22123 | 29685 | 9958  | 22086 | 29760 | 9920  | 234 | .40  |
| 62000 | .65 | .35 | 26195 | 28210 | 7595  | .6486 | .3514 | 25984 | 28151 | 7625  | 25954 | 28210 | 7595  | 241 | .27  |
| 62000 | .70 | .30 | 30380 | 26040 | 5580  | .6988 | .3012 | 30158 | 25996 | 5602  | 30136 | 26040 | 5580  | 244 | .18  |
| 62000 | .75 | .25 | 34875 | 23250 | 3875  | .7490 | .2510 | 34648 | 23220 | 3890  | 34633 | 23250 | 3875  | 242 | .11  |
| 62000 | .80 | .20 | 39680 | 19840 | 2480  | .7992 | .2008 | 39455 | 19821 | 2489  | 39446 | 19840 | 2480  | 234 | .06  |
| 62000 | .85 | .15 | 44795 | 15810 | 1395  | .8495 | .1505 | 44581 | 15800 | 1400  | 44576 | 15810 | 1395  | 219 | .02  |
| 62000 | .90 | .10 | 50220 | 11160 | 620   | .8997 | .1003 | 50030 | 11156 | 622   | 50029 | 11160 | 620   | 191 | .01  |
| 62000 | .95 | .05 | 55955 | 5890  | 155   | .9499 | .0501 | 55811 | 5889  | 155   | 55810 | 5890  | 155   | 145 | .00  |
| 63000 | .05 | .95 | 158   | 5985  | 56858 | .0496 | .9504 | 155   | 5941  | 56880 | 133   | 5985  | 56858 | 25  | 3.51 |

|       |     |     |       |       |       |       |       |       |       |       |       |       |       |     |      |
|-------|-----|-----|-------|-------|-------|-------|-------|-------|-------|-------|-------|-------|-------|-----|------|
| 63000 | .10 | .90 | 630   | 11340 | 51030 | .0993 | .9007 | 621   | 11261 | 51070 | 581   | 11340 | 51030 | 49  | 3.13 |
| 63000 | .15 | .85 | 1418  | 16065 | 45518 | .1490 | .8510 | 1397  | 15959 | 45570 | 1345  | 16065 | 45518 | 73  | 2.75 |
| 63000 | .20 | .80 | 2520  | 20160 | 40320 | .1988 | .8012 | 2485  | 20036 | 40382 | 2424  | 20160 | 40320 | 96  | 2.39 |
| 63000 | .25 | .75 | 3938  | 23625 | 35438 | .2486 | .7514 | 3886  | 23491 | 35505 | 3818  | 23625 | 35438 | 119 | 2.05 |
| 63000 | .30 | .70 | 5670  | 26460 | 30870 | .2984 | .7016 | 5598  | 26322 | 30939 | 5529  | 26460 | 30870 | 141 | 1.73 |
| 63000 | .35 | .65 | 7718  | 28665 | 26618 | .3483 | .6517 | 7625  | 28528 | 26686 | 7556  | 28665 | 26618 | 161 | 1.44 |
| 63000 | .40 | .60 | 10080 | 30240 | 22680 | .3983 | .6017 | 9965  | 30110 | 22745 | 9900  | 30240 | 22680 | 180 | 1.18 |
| 63000 | .45 | .55 | 12758 | 31185 | 19058 | .4483 | .5517 | 12620 | 31065 | 19117 | 12560 | 31185 | 19058 | 198 | .94  |
| 63000 | .50 | .50 | 15750 | 31500 | 15750 | .4983 | .5017 | 15590 | 31393 | 15803 | 15537 | 31500 | 15750 | 213 | .73  |
| 63000 | .55 | .45 | 19058 | 31185 | 12758 | .5484 | .4516 | 18877 | 31093 | 12803 | 18832 | 31185 | 12758 | 226 | .55  |
| 63000 | .60 | .40 | 22680 | 30240 | 10080 | .5985 | .4015 | 22482 | 30164 | 10118 | 22444 | 30240 | 10080 | 236 | .40  |
| 63000 | .65 | .35 | 26618 | 28665 | 7718  | .6486 | .3514 | 26404 | 28605 | 7747  | 26374 | 28665 | 7718  | 243 | .27  |
| 63000 | .70 | .30 | 30870 | 26460 | 5670  | .6988 | .3012 | 30646 | 26416 | 5692  | 30624 | 26460 | 5670  | 246 | .18  |
| 63000 | .75 | .25 | 35438 | 23625 | 3938  | .7490 | .2510 | 35209 | 23594 | 3953  | 35193 | 23625 | 3938  | 244 | .11  |
| 63000 | .80 | .20 | 40320 | 20160 | 2520  | .7992 | .2008 | 40093 | 20141 | 2529  | 40084 | 20160 | 2520  | 236 | .06  |
| 63000 | .85 | .15 | 45518 | 16065 | 1418  | .8495 | .1505 | 45302 | 16055 | 1422  | 45297 | 16065 | 1418  | 220 | .02  |
| 63000 | .90 | .10 | 51030 | 11340 | 630   | .8997 | .1003 | 50839 | 11336 | 632   | 50837 | 11340 | 630   | 193 | .01  |
| 63000 | .95 | .05 | 56858 | 5985  | 158   | .9499 | .0501 | 56712 | 5984  | 158   | 56712 | 5985  | 158   | 146 | .00  |
| 64000 | .05 | .95 | 160   | 6080  | 57760 | .0496 | .9504 | 158   | 6035  | 57782 | 135   | 6080  | 57760 | 25  | 3.51 |
| 64000 | .10 | .90 | 640   | 11520 | 51840 | .0993 | .9007 | 631   | 11440 | 51880 | 591   | 11520 | 51840 | 49  | 3.13 |
| 64000 | .15 | .85 | 1440  | 16320 | 46240 | .1490 | .8510 | 1420  | 16214 | 46293 | 1366  | 16320 | 46240 | 74  | 2.75 |
| 64000 | .20 | .80 | 2560  | 20480 | 40960 | .1988 | .8012 | 2525  | 20355 | 41022 | 2463  | 20480 | 40960 | 97  | 2.39 |
| 64000 | .25 | .75 | 4000  | 24000 | 36000 | .2486 | .7514 | 3948  | 23865 | 36068 | 3880  | 24000 | 36000 | 120 | 2.05 |
| 64000 | .30 | .70 | 5760  | 26880 | 31360 | .2984 | .7016 | 5688  | 26741 | 31430 | 5618  | 26880 | 31360 | 142 | 1.73 |
| 64000 | .35 | .65 | 7840  | 29120 | 27040 | .3483 | .6517 | 7746  | 28982 | 27109 | 7677  | 29120 | 27040 | 163 | 1.44 |
| 64000 | .40 | .60 | 10240 | 30720 | 23040 | .3983 | .6017 | 10124 | 30589 | 23106 | 10058 | 30720 | 23040 | 182 | 1.18 |
| 64000 | .45 | .55 | 12960 | 31680 | 19360 | .4483 | .5517 | 12821 | 31559 | 19420 | 12761 | 31680 | 19360 | 199 | .94  |
| 64000 | .50 | .50 | 16000 | 32000 | 16000 | .4983 | .5017 | 15839 | 31892 | 16054 | 15785 | 32000 | 16000 | 215 | .73  |
| 64000 | .55 | .45 | 19360 | 31680 | 12960 | .5484 | .4516 | 19179 | 31587 | 13006 | 19132 | 31680 | 12960 | 228 | .55  |
| 64000 | .60 | .40 | 23040 | 30720 | 10240 | .5985 | .4015 | 22840 | 30644 | 10278 | 22802 | 30720 | 10240 | 238 | .40  |
| 64000 | .65 | .35 | 27040 | 29120 | 7840  | .6487 | .3513 | 26825 | 29060 | 7870  | 26795 | 29120 | 7840  | 245 | .27  |
| 64000 | .70 | .30 | 31360 | 26880 | 5760  | .6988 | .3012 | 31135 | 26835 | 5782  | 31112 | 26880 | 5760  | 248 | .18  |
| 64000 | .75 | .25 | 36000 | 24000 | 4000  | .7490 | .2510 | 35769 | 23969 | 4015  | 35754 | 24000 | 4000  | 246 | .11  |

|       |     |     |       |       |       |       |       |       |       |       |       |       |       |     |      |
|-------|-----|-----|-------|-------|-------|-------|-------|-------|-------|-------|-------|-------|-------|-----|------|
| 64000 | .80 | .20 | 40960 | 20480 | 2560  | .7993 | .2007 | 40732 | 20461 | 2570  | 40722 | 20480 | 2560  | 238 | .06  |
| 64000 | .85 | .15 | 46240 | 16320 | 1440  | .8495 | .1505 | 46023 | 16310 | 1445  | 46018 | 16320 | 1440  | 222 | .02  |
| 64000 | .90 | .10 | 51840 | 11520 | 640   | .8997 | .1003 | 51647 | 11516 | 642   | 51645 | 11520 | 640   | 195 | .01  |
| 64000 | .95 | .05 | 57760 | 6080  | 160   | .9499 | .0501 | 57613 | 6079  | 160   | 57613 | 6080  | 160   | 147 | .00  |
| 65000 | .05 | .95 | 163   | 6175  | 58663 | .0496 | .9504 | 160   | 6130  | 58685 | 138   | 6175  | 58663 | 25  | 3.51 |
| 65000 | .10 | .90 | 650   | 11700 | 52650 | .0993 | .9007 | 641   | 11619 | 52690 | 600   | 11700 | 52650 | 50  | 3.13 |
| 65000 | .15 | .85 | 1463  | 16575 | 46963 | .1490 | .8510 | 1442  | 16468 | 47016 | 1388  | 16575 | 46963 | 74  | 2.75 |
| 65000 | .20 | .80 | 2600  | 20800 | 41600 | .1988 | .8012 | 2565  | 20674 | 41663 | 2502  | 20800 | 41600 | 98  | 2.39 |
| 65000 | .25 | .75 | 4063  | 24375 | 36563 | .2486 | .7514 | 4010  | 24239 | 36631 | 3942  | 24375 | 36563 | 121 | 2.05 |
| 65000 | .30 | .70 | 5850  | 27300 | 31850 | .2985 | .7015 | 5777  | 27160 | 31920 | 5707  | 27300 | 31850 | 143 | 1.73 |
| 65000 | .35 | .65 | 7963  | 29575 | 27463 | .3484 | .6516 | 7868  | 29436 | 27532 | 7799  | 29575 | 27463 | 164 | 1.44 |
| 65000 | .40 | .60 | 10400 | 31200 | 23400 | .3983 | .6017 | 10283 | 31068 | 23466 | 10217 | 31200 | 23400 | 183 | 1.17 |
| 65000 | .45 | .55 | 13163 | 32175 | 19663 | .4483 | .5517 | 13023 | 32053 | 19723 | 12962 | 32175 | 19663 | 201 | .94  |
| 65000 | .50 | .50 | 16250 | 32500 | 16250 | .4983 | .5017 | 16088 | 32391 | 16304 | 16034 | 32500 | 16250 | 216 | .73  |
| 65000 | .55 | .45 | 19663 | 32175 | 13163 | .5484 | .4516 | 19480 | 32082 | 13209 | 19433 | 32175 | 13163 | 230 | .55  |
| 65000 | .60 | .40 | 23400 | 31200 | 10400 | .5985 | .4015 | 23199 | 31123 | 10439 | 23160 | 31200 | 10400 | 240 | .40  |
| 65000 | .65 | .35 | 27463 | 29575 | 7963  | .6487 | .3513 | 27246 | 29514 | 7993  | 27216 | 29575 | 7963  | 247 | .27  |
| 65000 | .70 | .30 | 31850 | 27300 | 5850  | .6988 | .3012 | 31623 | 27255 | 5873  | 31600 | 27300 | 5850  | 250 | .18  |
| 65000 | .75 | .25 | 36563 | 24375 | 4063  | .7490 | .2510 | 36330 | 24344 | 4078  | 36315 | 24375 | 4063  | 248 | .11  |
| 65000 | .80 | .20 | 41600 | 20800 | 2600  | .7993 | .2007 | 41370 | 20781 | 2610  | 41360 | 20800 | 2600  | 240 | .06  |
| 65000 | .85 | .15 | 46963 | 16575 | 1463  | .8495 | .1505 | 46744 | 16565 | 1468  | 46739 | 16575 | 1463  | 224 | .02  |
| 65000 | .90 | .10 | 52650 | 11700 | 650   | .8997 | .1003 | 52456 | 11696 | 652   | 52454 | 11700 | 650   | 196 | .01  |
| 65000 | .95 | .05 | 58663 | 6175  | 163   | .9499 | .0501 | 58515 | 6174  | 163   | 58514 | 6175  | 163   | 148 | .00  |
| 66000 | .05 | .95 | 165   | 6270  | 59565 | .0496 | .9504 | 163   | 6225  | 59588 | 140   | 6270  | 59565 | 25  | 3.51 |
| 66000 | .10 | .90 | 660   | 11880 | 53460 | .0993 | .9007 | 651   | 11799 | 53501 | 610   | 11880 | 53460 | 50  | 3.13 |
| 66000 | .15 | .85 | 1485  | 16830 | 47685 | .1490 | .8510 | 1464  | 16722 | 47739 | 1410  | 16830 | 47685 | 75  | 2.75 |
| 66000 | .20 | .80 | 2640  | 21120 | 42240 | .1988 | .8012 | 2605  | 20994 | 42303 | 2541  | 21120 | 42240 | 99  | 2.39 |
| 66000 | .25 | .75 | 4125  | 24750 | 37125 | .2486 | .7514 | 4072  | 24613 | 37194 | 4003  | 24750 | 37125 | 122 | 2.05 |
| 66000 | .30 | .70 | 5940  | 27720 | 32340 | .2985 | .7015 | 5867  | 27578 | 32411 | 5796  | 27720 | 32340 | 144 | 1.73 |
| 66000 | .35 | .65 | 8085  | 30030 | 27885 | .3484 | .6516 | 7990  | 29890 | 27955 | 7920  | 30030 | 27885 | 165 | 1.44 |
| 66000 | .40 | .60 | 10560 | 31680 | 23760 | .3983 | .6017 | 10442 | 31547 | 23827 | 10375 | 31680 | 23760 | 185 | 1.17 |
| 66000 | .45 | .55 | 13365 | 32670 | 19965 | .4483 | .5517 | 13224 | 32547 | 20026 | 13163 | 32670 | 19965 | 202 | .94  |
| 66000 | .50 | .50 | 16500 | 33000 | 16500 | .4983 | .5017 | 16337 | 32891 | 16555 | 16282 | 33000 | 16500 | 218 | .73  |

|       |     |     |       |       |       |       |       |       |       |       |       |       |       |     |      |
|-------|-----|-----|-------|-------|-------|-------|-------|-------|-------|-------|-------|-------|-------|-----|------|
| 66000 | .55 | .45 | 19965 | 32670 | 13365 | .5484 | .4516 | 19781 | 32576 | 13412 | 19734 | 32670 | 13365 | 231 | .55  |
| 66000 | .60 | .40 | 23760 | 31680 | 10560 | .5985 | .4015 | 23557 | 31602 | 10599 | 23518 | 31680 | 10560 | 242 | .40  |
| 66000 | .65 | .35 | 27885 | 30030 | 8085  | .6487 | .3513 | 27667 | 29969 | 8116  | 27636 | 30030 | 8085  | 249 | .27  |
| 66000 | .70 | .30 | 32340 | 27720 | 5940  | .6989 | .3011 | 32111 | 27675 | 5963  | 32088 | 27720 | 5940  | 252 | .18  |
| 66000 | .75 | .25 | 37125 | 24750 | 4125  | .7491 | .2509 | 36891 | 24719 | 4141  | 36875 | 24750 | 4125  | 250 | .11  |
| 66000 | .80 | .20 | 42240 | 21120 | 2640  | .7993 | .2007 | 42008 | 21101 | 2650  | 41998 | 21120 | 2640  | 242 | .06  |
| 66000 | .85 | .15 | 47685 | 16830 | 1485  | .8495 | .1505 | 47465 | 16820 | 1490  | 47460 | 16830 | 1485  | 225 | .02  |
| 66000 | .90 | .10 | 53460 | 11880 | 660   | .8997 | .1003 | 53264 | 11876 | 662   | 53262 | 11880 | 660   | 198 | .01  |
| 66000 | .95 | .05 | 59565 | 6270  | 165   | .9499 | .0501 | 59416 | 6269  | 165   | 59416 | 6270  | 165   | 149 | .00  |
| 67000 | .05 | .95 | 168   | 6365  | 60468 | .0496 | .9504 | 165   | 6319  | 60490 | 142   | 6365  | 60468 | 25  | 3.51 |
| 67000 | .10 | .90 | 670   | 12060 | 54270 | .0993 | .9007 | 660   | 11978 | 54311 | 620   | 12060 | 54270 | 50  | 3.13 |
| 67000 | .15 | .85 | 1508  | 17085 | 48408 | .1490 | .8510 | 1487  | 16976 | 48462 | 1432  | 17085 | 48408 | 75  | 2.75 |
| 67000 | .20 | .80 | 2680  | 21440 | 42880 | .1988 | .8012 | 2644  | 21313 | 42944 | 2581  | 21440 | 42880 | 99  | 2.39 |
| 67000 | .25 | .75 | 4188  | 25125 | 37688 | .2486 | .7514 | 4134  | 24987 | 37757 | 4065  | 25125 | 37688 | 123 | 2.05 |
| 67000 | .30 | .70 | 6030  | 28140 | 32830 | .2985 | .7015 | 5956  | 27997 | 32901 | 5885  | 28140 | 32830 | 145 | 1.73 |
| 67000 | .35 | .65 | 8208  | 30485 | 28308 | .3484 | .6516 | 8112  | 30344 | 28378 | 8041  | 30485 | 28308 | 166 | 1.44 |
| 67000 | .40 | .60 | 10720 | 32160 | 24120 | .3983 | .6017 | 10601 | 32026 | 24187 | 10534 | 32160 | 24120 | 186 | 1.17 |
| 67000 | .45 | .55 | 13568 | 33165 | 20268 | .4483 | .5517 | 13425 | 33041 | 20329 | 13364 | 33165 | 20268 | 204 | .94  |
| 67000 | .50 | .50 | 16750 | 33500 | 16750 | .4984 | .5016 | 16585 | 33390 | 16805 | 16530 | 33500 | 16750 | 220 | .73  |
| 67000 | .55 | .45 | 20268 | 33165 | 13568 | .5484 | .4516 | 20082 | 33070 | 13615 | 20034 | 33165 | 13568 | 233 | .55  |
| 67000 | .60 | .40 | 24120 | 32160 | 10720 | .5985 | .4015 | 23916 | 32082 | 10759 | 23876 | 32160 | 10720 | 244 | .40  |
| 67000 | .65 | .35 | 28308 | 30485 | 8208  | .6487 | .3513 | 28088 | 30423 | 8238  | 28057 | 30485 | 8208  | 251 | .27  |
| 67000 | .70 | .30 | 32830 | 28140 | 6030  | .6989 | .3011 | 32599 | 28094 | 6053  | 32576 | 28140 | 6030  | 254 | .18  |
| 67000 | .75 | .25 | 37688 | 25125 | 4188  | .7491 | .2509 | 37452 | 25093 | 4203  | 37436 | 25125 | 4188  | 252 | .11  |
| 67000 | .80 | .20 | 42880 | 21440 | 2680  | .7993 | .2007 | 42646 | 21420 | 2690  | 42636 | 21440 | 2680  | 244 | .06  |
| 67000 | .85 | .15 | 48408 | 17085 | 1508  | .8495 | .1505 | 48185 | 17075 | 1513  | 48180 | 17085 | 1508  | 227 | .02  |
| 67000 | .90 | .10 | 54270 | 12060 | 670   | .8997 | .1003 | 54073 | 12056 | 672   | 54071 | 12060 | 670   | 199 | .01  |
| 67000 | .95 | .05 | 60468 | 6365  | 168   | .9499 | .0501 | 60317 | 6364  | 168   | 60317 | 6365  | 168   | 150 | .00  |
| 68000 | .05 | .95 | 170   | 6460  | 61370 | .0496 | .9504 | 168   | 6414  | 61393 | 144   | 6460  | 61370 | 26  | 3.51 |
| 68000 | .10 | .90 | 680   | 12240 | 55080 | .0993 | .9007 | 670   | 12158 | 55121 | 629   | 12240 | 55080 | 51  | 3.12 |
| 68000 | .15 | .85 | 1530  | 17340 | 49130 | .1491 | .8509 | 1509  | 17230 | 49185 | 1454  | 17340 | 49130 | 76  | 2.75 |
| 68000 | .20 | .80 | 2720  | 21760 | 43520 | .1988 | .8012 | 2684  | 21632 | 43584 | 2620  | 21760 | 43520 | 100 | 2.39 |
| 68000 | .25 | .75 | 4250  | 25500 | 38250 | .2486 | .7514 | 4196  | 25361 | 38320 | 4126  | 25500 | 38250 | 124 | 2.05 |

|       |     |     |       |       |       |       |       |       |       |       |       |       |       |     |      |
|-------|-----|-----|-------|-------|-------|-------|-------|-------|-------|-------|-------|-------|-------|-----|------|
| 68000 | .30 | .70 | 6120  | 28560 | 33320 | .2985 | .7015 | 6046  | 28416 | 33392 | 5974  | 28560 | 33320 | 146 | 1.73 |
| 68000 | .35 | .65 | 8330  | 30940 | 28730 | .3484 | .6516 | 8233  | 30798 | 28801 | 8162  | 30940 | 28730 | 168 | 1.44 |
| 68000 | .40 | .60 | 10880 | 32640 | 24480 | .3983 | .6017 | 10760 | 32505 | 24548 | 10693 | 32640 | 24480 | 187 | 1.17 |
| 68000 | .45 | .55 | 13770 | 33660 | 20570 | .4483 | .5517 | 13627 | 33535 | 20632 | 13565 | 33660 | 20570 | 205 | .94  |
| 68000 | .50 | .50 | 17000 | 34000 | 17000 | .4984 | .5016 | 16834 | 33889 | 17056 | 16779 | 34000 | 17000 | 221 | .73  |
| 68000 | .55 | .45 | 20570 | 33660 | 13770 | .5484 | .4516 | 20383 | 33565 | 13818 | 20335 | 33660 | 13770 | 235 | .55  |
| 68000 | .60 | .40 | 24480 | 32640 | 10880 | .5986 | .4014 | 24274 | 32561 | 10919 | 24235 | 32640 | 10880 | 245 | .40  |
| 68000 | .65 | .35 | 28730 | 30940 | 8330  | .6487 | .3513 | 28509 | 30878 | 8361  | 28478 | 30940 | 8330  | 252 | .27  |
| 68000 | .70 | .30 | 33320 | 28560 | 6120  | .6989 | .3011 | 33088 | 28514 | 6143  | 33064 | 28560 | 6120  | 256 | .18  |
| 68000 | .75 | .25 | 38250 | 25500 | 4250  | .7491 | .2509 | 38012 | 25468 | 4266  | 37996 | 25500 | 4250  | 254 | .11  |
| 68000 | .80 | .20 | 43520 | 21760 | 2720  | .7993 | .2007 | 43285 | 21740 | 2730  | 43275 | 21760 | 2720  | 245 | .06  |
| 68000 | .85 | .15 | 49130 | 17340 | 1530  | .8495 | .1505 | 48906 | 17330 | 1535  | 48901 | 17340 | 1530  | 229 | .02  |
| 68000 | .90 | .10 | 55080 | 12240 | 680   | .8997 | .1003 | 54882 | 12236 | 682   | 54879 | 12240 | 680   | 201 | .01  |
| 68000 | .95 | .05 | 61370 | 6460  | 170   | .9499 | .0501 | 61219 | 6459  | 170   | 61218 | 6460  | 170   | 152 | .00  |
| 69000 | .05 | .95 | 173   | 6555  | 62273 | .0496 | .9504 | 170   | 6509  | 62296 | 147   | 6555  | 62273 | 26  | 3.51 |
| 69000 | .10 | .90 | 690   | 12420 | 55890 | .0993 | .9007 | 680   | 12337 | 55932 | 639   | 12420 | 55890 | 51  | 3.12 |
| 69000 | .15 | .85 | 1553  | 17595 | 49853 | .1491 | .8509 | 1531  | 17485 | 49908 | 1476  | 17595 | 49853 | 76  | 2.75 |
| 69000 | .20 | .80 | 2760  | 22080 | 44160 | .1988 | .8012 | 2724  | 21951 | 44225 | 2659  | 22080 | 44160 | 101 | 2.39 |
| 69000 | .25 | .75 | 4313  | 25875 | 38813 | .2486 | .7514 | 4258  | 25735 | 38883 | 4188  | 25875 | 38813 | 125 | 2.05 |
| 69000 | .30 | .70 | 6210  | 28980 | 33810 | .2985 | .7015 | 6135  | 28835 | 33882 | 6063  | 28980 | 33810 | 147 | 1.73 |
| 69000 | .35 | .65 | 8453  | 31395 | 29153 | .3484 | .6516 | 8355  | 31252 | 29224 | 8284  | 31395 | 29153 | 169 | 1.44 |
| 69000 | .40 | .60 | 11040 | 33120 | 24840 | .3984 | .6016 | 10919 | 32984 | 24908 | 10851 | 33120 | 24840 | 189 | 1.17 |
| 69000 | .45 | .55 | 13973 | 34155 | 20873 | .4483 | .5517 | 13828 | 34029 | 20935 | 13766 | 34155 | 20873 | 207 | .94  |
| 69000 | .50 | .50 | 17250 | 34500 | 17250 | .4984 | .5016 | 17083 | 34388 | 17306 | 17027 | 34500 | 17250 | 223 | .73  |
| 69000 | .55 | .45 | 20873 | 34155 | 13973 | .5485 | .4515 | 20684 | 34059 | 14021 | 20636 | 34155 | 13973 | 236 | .55  |
| 69000 | .60 | .40 | 24840 | 33120 | 11040 | .5986 | .4014 | 24633 | 33041 | 11080 | 24593 | 33120 | 11040 | 247 | .40  |
| 69000 | .65 | .35 | 29153 | 31395 | 8453  | .6487 | .3513 | 28929 | 31332 | 8484  | 28898 | 31395 | 8453  | 254 | .27  |
| 69000 | .70 | .30 | 33810 | 28980 | 6210  | .6989 | .3011 | 33576 | 28933 | 6233  | 33553 | 28980 | 6210  | 257 | .18  |
| 69000 | .75 | .25 | 38813 | 25875 | 4313  | .7491 | .2509 | 38573 | 25843 | 4329  | 38557 | 25875 | 4313  | 255 | .11  |
| 69000 | .80 | .20 | 44160 | 22080 | 2760  | .7993 | .2007 | 43923 | 22060 | 2770  | 43913 | 22080 | 2760  | 247 | .06  |
| 69000 | .85 | .15 | 49853 | 17595 | 1553  | .8495 | .1505 | 49627 | 17585 | 1558  | 49622 | 17595 | 1553  | 231 | .02  |
| 69000 | .90 | .10 | 55890 | 12420 | 690   | .8997 | .1003 | 55690 | 12416 | 692   | 55688 | 12420 | 690   | 202 | .01  |
| 69000 | .95 | .05 | 62273 | 6555  | 173   | .9499 | .0501 | 62120 | 6554  | 173   | 62120 | 6555  | 173   | 153 | .00  |



|       |     |     |       |       |       |       |       |       |       |       |       |       |       |     |      |
|-------|-----|-----|-------|-------|-------|-------|-------|-------|-------|-------|-------|-------|-------|-----|------|
| 70000 | .05 | .95 | 175   | 6650  | 63175 | .0496 | .9504 | 172   | 6603  | 63198 | 149   | 6650  | 63175 | 26  | 3.51 |
| 70000 | .10 | .90 | 700   | 12600 | 56700 | .0993 | .9007 | 690   | 12516 | 56742 | 648   | 12600 | 56700 | 52  | 3.12 |
| 70000 | .15 | .85 | 1575  | 17850 | 50575 | .1491 | .8509 | 1554  | 17739 | 50631 | 1498  | 17850 | 50575 | 77  | 2.75 |
| 70000 | .20 | .80 | 2800  | 22400 | 44800 | .1988 | .8012 | 2764  | 22270 | 44865 | 2698  | 22400 | 44800 | 102 | 2.39 |
| 70000 | .25 | .75 | 4375  | 26250 | 39375 | .2487 | .7513 | 4320  | 26109 | 39446 | 4249  | 26250 | 39375 | 126 | 2.05 |
| 70000 | .30 | .70 | 6300  | 29400 | 34300 | .2985 | .7015 | 6224  | 29254 | 34373 | 6152  | 29400 | 34300 | 148 | 1.73 |
| 70000 | .35 | .65 | 8575  | 31850 | 29575 | .3484 | .6516 | 8477  | 31706 | 29647 | 8405  | 31850 | 29575 | 170 | 1.44 |
| 70000 | .40 | .60 | 11200 | 33600 | 25200 | .3984 | .6016 | 11079 | 33463 | 25269 | 11010 | 33600 | 25200 | 190 | 1.17 |
| 70000 | .45 | .55 | 14175 | 34650 | 21175 | .4484 | .5516 | 14030 | 34524 | 21238 | 13967 | 34650 | 21175 | 208 | .94  |
| 70000 | .50 | .50 | 17500 | 35000 | 17500 | .4984 | .5016 | 17332 | 34887 | 17556 | 17275 | 35000 | 17500 | 225 | .73  |
| 70000 | .55 | .45 | 21175 | 34650 | 14175 | .5485 | .4515 | 20985 | 34553 | 14223 | 20937 | 34650 | 14175 | 238 | .55  |
| 70000 | .60 | .40 | 25200 | 33600 | 11200 | .5986 | .4014 | 24991 | 33520 | 11240 | 24951 | 33600 | 11200 | 249 | .40  |
| 70000 | .65 | .35 | 29575 | 31850 | 8575  | .6487 | .3513 | 29350 | 31787 | 8606  | 29319 | 31850 | 8575  | 256 | .27  |
| 70000 | .70 | .30 | 34300 | 29400 | 6300  | .6989 | .3011 | 34064 | 29353 | 6323  | 34041 | 29400 | 6300  | 259 | .18  |
| 70000 | .75 | .25 | 39375 | 26250 | 4375  | .7491 | .2509 | 39134 | 26218 | 4391  | 39118 | 26250 | 4375  | 257 | .11  |
| 70000 | .80 | .20 | 44800 | 22400 | 2800  | .7993 | .2007 | 44561 | 22380 | 2810  | 44551 | 22400 | 2800  | 249 | .06  |
| 70000 | .85 | .15 | 50575 | 17850 | 1575  | .8495 | .1505 | 50348 | 17840 | 1580  | 50343 | 17850 | 1575  | 232 | .02  |
| 70000 | .90 | .10 | 56700 | 12600 | 700   | .8997 | .1003 | 56499 | 12596 | 702   | 56497 | 12600 | 700   | 203 | .01  |
| 70000 | .95 | .05 | 63175 | 6650  | 175   | .9499 | .0501 | 63022 | 6649  | 175   | 63021 | 6650  | 175   | 154 | .00  |
| 71000 | .05 | .95 | 178   | 6745  | 64078 | .0497 | .9503 | 175   | 6698  | 64101 | 151   | 6745  | 64078 | 26  | 3.51 |
| 71000 | .10 | .90 | 710   | 12780 | 57510 | .0993 | .9007 | 700   | 12696 | 57552 | 658   | 12780 | 57510 | 52  | 3.12 |
| 71000 | .15 | .85 | 1598  | 18105 | 51298 | .1491 | .8509 | 1576  | 17993 | 51354 | 1520  | 18105 | 51298 | 77  | 2.75 |
| 71000 | .20 | .80 | 2840  | 22720 | 45440 | .1988 | .8012 | 2803  | 22589 | 45506 | 2738  | 22720 | 45440 | 102 | 2.39 |
| 71000 | .25 | .75 | 4438  | 26625 | 39938 | .2487 | .7513 | 4382  | 26483 | 40009 | 4311  | 26625 | 39938 | 126 | 2.05 |
| 71000 | .30 | .70 | 6390  | 29820 | 34790 | .2985 | .7015 | 6314  | 29673 | 34863 | 6241  | 29820 | 34790 | 149 | 1.73 |
| 71000 | .35 | .65 | 8698  | 32305 | 29998 | .3484 | .6516 | 8599  | 32160 | 30070 | 8526  | 32305 | 29998 | 171 | 1.44 |
| 71000 | .40 | .60 | 11360 | 34080 | 25560 | .3984 | .6016 | 11238 | 33942 | 25629 | 11169 | 34080 | 25560 | 191 | 1.17 |
| 71000 | .45 | .55 | 14378 | 35145 | 21478 | .4484 | .5516 | 14231 | 35018 | 21541 | 14168 | 35145 | 21478 | 210 | .94  |
| 71000 | .50 | .50 | 17750 | 35500 | 17750 | .4984 | .5016 | 17581 | 35387 | 17807 | 17524 | 35500 | 17750 | 226 | .73  |
| 71000 | .55 | .45 | 21478 | 35145 | 14378 | .5485 | .4515 | 21286 | 35048 | 14426 | 21238 | 35145 | 14378 | 240 | .55  |
| 71000 | .60 | .40 | 25560 | 34080 | 11360 | .5986 | .4014 | 25350 | 33999 | 11400 | 25309 | 34080 | 11360 | 251 | .40  |
| 71000 | .65 | .35 | 29998 | 32305 | 8698  | .6487 | .3513 | 29771 | 32242 | 8729  | 29740 | 32305 | 8698  | 258 | .27  |
| 71000 | .70 | .30 | 34790 | 29820 | 6390  | .6989 | .3011 | 34553 | 29773 | 6414  | 34529 | 29820 | 6390  | 261 | .18  |

|       |     |     |       |       |       |       |       |       |       |       |       |       |       |     |      |
|-------|-----|-----|-------|-------|-------|-------|-------|-------|-------|-------|-------|-------|-------|-----|------|
| 71000 | .75 | .25 | 39938 | 26625 | 4438  | .7491 | .2509 | 39695 | 26592 | 4454  | 39678 | 26625 | 4438  | 259 | .11  |
| 71000 | .80 | .20 | 45440 | 22720 | 2840  | .7993 | .2007 | 45199 | 22700 | 2850  | 45189 | 22720 | 2840  | 251 | .06  |
| 71000 | .85 | .15 | 51298 | 18105 | 1598  | .8495 | .1505 | 51069 | 18094 | 1603  | 51064 | 18105 | 1598  | 234 | .02  |
| 71000 | .90 | .10 | 57510 | 12780 | 710   | .8997 | .1003 | 57307 | 12776 | 712   | 57305 | 12780 | 710   | 205 | .01  |
| 71000 | .95 | .05 | 64078 | 6745  | 178   | .9499 | .0501 | 63923 | 6744  | 178   | 63923 | 6745  | 178   | 155 | .00  |
| 72000 | .05 | .95 | 180   | 6840  | 64980 | .0497 | .9503 | 177   | 6793  | 65004 | 154   | 6840  | 64980 | 26  | 3.51 |
| 72000 | .10 | .90 | 720   | 12960 | 58320 | .0993 | .9007 | 710   | 12875 | 58362 | 668   | 12960 | 58320 | 52  | 3.12 |
| 72000 | .15 | .85 | 1620  | 18360 | 52020 | .1491 | .8509 | 1598  | 18247 | 52076 | 1542  | 18360 | 52020 | 78  | 2.75 |
| 72000 | .20 | .80 | 2880  | 23040 | 46080 | .1989 | .8011 | 2843  | 22908 | 46146 | 2777  | 23040 | 46080 | 103 | 2.39 |
| 72000 | .25 | .75 | 4500  | 27000 | 40500 | .2487 | .7513 | 4444  | 26857 | 40572 | 4373  | 27000 | 40500 | 127 | 2.05 |
| 72000 | .30 | .70 | 6480  | 30240 | 35280 | .2985 | .7015 | 6403  | 30092 | 35354 | 6329  | 30240 | 35280 | 151 | 1.73 |
| 72000 | .35 | .65 | 8820  | 32760 | 30420 | .3484 | .6516 | 8721  | 32614 | 30493 | 8648  | 32760 | 30420 | 172 | 1.44 |
| 72000 | .40 | .60 | 11520 | 34560 | 25920 | .3984 | .6016 | 11397 | 34421 | 25990 | 11327 | 34560 | 25920 | 193 | 1.17 |
| 72000 | .45 | .55 | 14580 | 35640 | 21780 | .4484 | .5516 | 14433 | 35512 | 21844 | 14369 | 35640 | 21780 | 211 | .94  |
| 72000 | .50 | .50 | 18000 | 36000 | 18000 | .4984 | .5016 | 17829 | 35886 | 18057 | 17772 | 36000 | 18000 | 228 | .73  |
| 72000 | .55 | .45 | 21780 | 35640 | 14580 | .5485 | .4515 | 21588 | 35542 | 14629 | 21538 | 35640 | 14580 | 242 | .55  |
| 72000 | .60 | .40 | 25920 | 34560 | 11520 | .5986 | .4014 | 25708 | 34479 | 11561 | 25668 | 34560 | 11520 | 252 | .40  |
| 72000 | .65 | .35 | 30420 | 32760 | 8820  | .6487 | .3513 | 30192 | 32696 | 8852  | 30160 | 32760 | 8820  | 260 | .27  |
| 72000 | .70 | .30 | 35280 | 30240 | 6480  | .6989 | .3011 | 35041 | 30193 | 6504  | 35017 | 30240 | 6480  | 263 | .18  |
| 72000 | .75 | .25 | 40500 | 27000 | 4500  | .7491 | .2509 | 40255 | 26967 | 4516  | 40239 | 27000 | 4500  | 261 | .11  |
| 72000 | .80 | .20 | 46080 | 23040 | 2880  | .7993 | .2007 | 45838 | 23020 | 2890  | 45828 | 23040 | 2880  | 252 | .06  |
| 72000 | .85 | .15 | 52020 | 18360 | 1620  | .8495 | .1505 | 51790 | 18349 | 1625  | 51785 | 18360 | 1620  | 235 | .02  |
| 72000 | .90 | .10 | 58320 | 12960 | 720   | .8997 | .1003 | 58116 | 12956 | 722   | 58114 | 12960 | 720   | 206 | .01  |
| 72000 | .95 | .05 | 64980 | 6840  | 180   | .9499 | .0501 | 64824 | 6839  | 180   | 64824 | 6840  | 180   | 156 | .00  |
| 73000 | .05 | .95 | 183   | 6935  | 65883 | .0497 | .9503 | 180   | 6887  | 65906 | 156   | 6935  | 65883 | 26  | 3.51 |
| 73000 | .10 | .90 | 730   | 13140 | 59130 | .0993 | .9007 | 720   | 13055 | 59173 | 677   | 13140 | 59130 | 53  | 3.12 |
| 73000 | .15 | .85 | 1643  | 18615 | 52743 | .1491 | .8509 | 1621  | 18501 | 52799 | 1564  | 18615 | 52743 | 79  | 2.75 |
| 73000 | .20 | .80 | 2920  | 23360 | 46720 | .1989 | .8011 | 2883  | 23227 | 46787 | 2816  | 23360 | 46720 | 104 | 2.39 |
| 73000 | .25 | .75 | 4563  | 27375 | 41063 | .2487 | .7513 | 4507  | 27231 | 41135 | 4434  | 27375 | 41063 | 128 | 2.05 |
| 73000 | .30 | .70 | 6570  | 30660 | 35770 | .2985 | .7015 | 6493  | 30511 | 35844 | 6418  | 30660 | 35770 | 152 | 1.73 |
| 73000 | .35 | .65 | 8943  | 33215 | 30843 | .3485 | .6515 | 8842  | 33068 | 30916 | 8769  | 33215 | 30843 | 174 | 1.44 |
| 73000 | .40 | .60 | 11680 | 35040 | 26280 | .3984 | .6016 | 11556 | 34900 | 26350 | 11486 | 35040 | 26280 | 194 | 1.17 |
| 73000 | .45 | .55 | 14783 | 36135 | 22083 | .4484 | .5516 | 14634 | 36006 | 22147 | 14570 | 36135 | 22083 | 213 | .94  |

|       |     |     |       |       |       |       |       |       |       |       |       |       |       |     |      |
|-------|-----|-----|-------|-------|-------|-------|-------|-------|-------|-------|-------|-------|-------|-----|------|
| 73000 | .50 | .50 | 18250 | 36500 | 18250 | .4984 | .5016 | 18078 | 36385 | 18308 | 18021 | 36500 | 18250 | 229 | .73  |
| 73000 | .55 | .45 | 22083 | 36135 | 14783 | .5485 | .4515 | 21889 | 36036 | 14832 | 21839 | 36135 | 14783 | 243 | .55  |
| 73000 | .60 | .40 | 26280 | 35040 | 11680 | .5986 | .4014 | 26067 | 34958 | 11721 | 26026 | 35040 | 11680 | 254 | .40  |
| 73000 | .65 | .35 | 30843 | 33215 | 8943  | .6487 | .3513 | 30613 | 33151 | 8975  | 30581 | 33215 | 8943  | 262 | .27  |
| 73000 | .70 | .30 | 35770 | 30660 | 6570  | .6989 | .3011 | 35529 | 30612 | 6594  | 35505 | 30660 | 6570  | 265 | .18  |
| 73000 | .75 | .25 | 41063 | 27375 | 4563  | .7491 | .2509 | 40816 | 27342 | 4579  | 40800 | 27375 | 4563  | 263 | .11  |
| 73000 | .80 | .20 | 46720 | 23360 | 2920  | .7993 | .2007 | 46476 | 23340 | 2930  | 46466 | 23360 | 2920  | 254 | .06  |
| 73000 | .85 | .15 | 52743 | 18615 | 1643  | .8495 | .1505 | 52511 | 18604 | 1648  | 52505 | 18615 | 1643  | 237 | .02  |
| 73000 | .90 | .10 | 59130 | 13140 | 730   | .8997 | .1003 | 58924 | 13136 | 732   | 58922 | 13140 | 730   | 208 | .01  |
| 73000 | .95 | .05 | 65883 | 6935  | 183   | .9499 | .0501 | 65726 | 6934  | 183   | 65725 | 6935  | 183   | 157 | .00  |
| 74000 | .05 | .95 | 185   | 7030  | 66785 | .0497 | .9503 | 182   | 6982  | 66809 | 158   | 7030  | 66785 | 27  | 3.51 |
| 74000 | .10 | .90 | 740   | 13320 | 59940 | .0994 | .9006 | 730   | 13234 | 59983 | 687   | 13320 | 59940 | 53  | 3.12 |
| 74000 | .15 | .85 | 1665  | 18870 | 53465 | .1491 | .8509 | 1643  | 18756 | 53522 | 1586  | 18870 | 53465 | 79  | 2.75 |
| 74000 | .20 | .80 | 2960  | 23680 | 47360 | .1989 | .8011 | 2922  | 23546 | 47427 | 2856  | 23680 | 47360 | 104 | 2.39 |
| 74000 | .25 | .75 | 4625  | 27750 | 41625 | .2487 | .7513 | 4569  | 27605 | 41698 | 4496  | 27750 | 41625 | 129 | 2.05 |
| 74000 | .30 | .70 | 6660  | 31080 | 36260 | .2986 | .7014 | 6582  | 30930 | 36335 | 6507  | 31080 | 36260 | 153 | 1.73 |
| 74000 | .35 | .65 | 9065  | 33670 | 31265 | .3485 | .6515 | 8964  | 33522 | 31339 | 8890  | 33670 | 31265 | 175 | 1.44 |
| 74000 | .40 | .60 | 11840 | 35520 | 26640 | .3984 | .6016 | 11715 | 35379 | 26711 | 11645 | 35520 | 26640 | 195 | 1.17 |
| 74000 | .45 | .55 | 14985 | 36630 | 22385 | .4484 | .5516 | 14836 | 36500 | 22450 | 14771 | 36630 | 22385 | 214 | .94  |
| 74000 | .50 | .50 | 18500 | 37000 | 18500 | .4984 | .5016 | 18327 | 36884 | 18558 | 18269 | 37000 | 18500 | 231 | .73  |
| 74000 | .55 | .45 | 22385 | 36630 | 14985 | .5485 | .4515 | 22190 | 36530 | 15035 | 22140 | 36630 | 14985 | 245 | .55  |
| 74000 | .60 | .40 | 26640 | 35520 | 11840 | .5986 | .4014 | 26425 | 35438 | 11881 | 26384 | 35520 | 11840 | 256 | .40  |
| 74000 | .65 | .35 | 31265 | 33670 | 9065  | .6487 | .3513 | 31034 | 33605 | 9097  | 31002 | 33670 | 9065  | 263 | .27  |
| 74000 | .70 | .30 | 36260 | 31080 | 6660  | .6989 | .3011 | 36018 | 31032 | 6684  | 35993 | 31080 | 6660  | 267 | .18  |
| 74000 | .75 | .25 | 41625 | 27750 | 4625  | .7491 | .2509 | 41377 | 27717 | 4642  | 41361 | 27750 | 4625  | 264 | .11  |
| 74000 | .80 | .20 | 47360 | 23680 | 2960  | .7993 | .2007 | 47114 | 23659 | 2970  | 47104 | 23680 | 2960  | 256 | .06  |
| 74000 | .85 | .15 | 53465 | 18870 | 1665  | .8495 | .1505 | 53232 | 18859 | 1670  | 53226 | 18870 | 1665  | 239 | .02  |
| 74000 | .90 | .10 | 59940 | 13320 | 740   | .8997 | .1003 | 59733 | 13316 | 742   | 59731 | 13320 | 740   | 209 | .01  |
| 74000 | .95 | .05 | 66785 | 7030  | 185   | .9499 | .0501 | 66627 | 7029  | 185   | 66627 | 7030  | 185   | 158 | .00  |
| 75000 | .05 | .95 | 188   | 7125  | 67688 | .0497 | .9503 | 185   | 7077  | 67712 | 161   | 7125  | 67688 | 27  | 3.51 |
| 75000 | .10 | .90 | 750   | 13500 | 60750 | .0994 | .9006 | 740   | 13413 | 60793 | 697   | 13500 | 60750 | 53  | 3.12 |
| 75000 | .15 | .85 | 1688  | 19125 | 54188 | .1491 | .8509 | 1665  | 19010 | 54245 | 1608  | 19125 | 54188 | 80  | 2.75 |
| 75000 | .20 | .80 | 3000  | 24000 | 48000 | .1989 | .8011 | 2962  | 23865 | 48067 | 2895  | 24000 | 48000 | 105 | 2.39 |

|       |     |     |       |       |       |       |       |       |       |       |       |       |       |     |      |
|-------|-----|-----|-------|-------|-------|-------|-------|-------|-------|-------|-------|-------|-------|-----|------|
| 75000 | .25 | .75 | 4688  | 28125 | 42188 | .2487 | .7513 | 4631  | 27979 | 42261 | 4558  | 28125 | 42188 | 130 | 2.05 |
| 75000 | .30 | .70 | 6750  | 31500 | 36750 | .2986 | .7014 | 6672  | 31349 | 36825 | 6596  | 31500 | 36750 | 154 | 1.73 |
| 75000 | .35 | .65 | 9188  | 34125 | 31688 | .3485 | .6515 | 9086  | 33976 | 31762 | 9012  | 34125 | 31688 | 176 | 1.44 |
| 75000 | .40 | .60 | 12000 | 36000 | 27000 | .3984 | .6016 | 11874 | 35858 | 27071 | 11803 | 36000 | 27000 | 197 | 1.17 |
| 75000 | .45 | .55 | 15188 | 37125 | 22688 | .4484 | .5516 | 15037 | 36994 | 22753 | 14972 | 37125 | 22688 | 216 | .94  |
| 75000 | .50 | .50 | 18750 | 37500 | 18750 | .4984 | .5016 | 18576 | 37383 | 18808 | 18518 | 37500 | 18750 | 232 | .73  |
| 75000 | .55 | .45 | 22688 | 37125 | 15188 | .5485 | .4515 | 22491 | 37025 | 15238 | 22441 | 37125 | 15188 | 247 | .55  |
| 75000 | .60 | .40 | 27000 | 36000 | 12000 | .5986 | .4014 | 26784 | 35917 | 12041 | 26742 | 36000 | 12000 | 258 | .40  |
| 75000 | .65 | .35 | 31688 | 34125 | 9188  | .6488 | .3512 | 31455 | 34060 | 9220  | 31422 | 34125 | 9188  | 265 | .27  |
| 75000 | .70 | .30 | 36750 | 31500 | 6750  | .6989 | .3011 | 36506 | 31452 | 6774  | 36482 | 31500 | 6750  | 268 | .18  |
| 75000 | .75 | .25 | 42188 | 28125 | 4688  | .7491 | .2509 | 41938 | 28092 | 4704  | 41921 | 28125 | 4688  | 266 | .11  |
| 75000 | .80 | .20 | 48000 | 24000 | 3000  | .7993 | .2007 | 47753 | 23979 | 3010  | 47742 | 24000 | 3000  | 258 | .06  |
| 75000 | .85 | .15 | 54188 | 19125 | 1688  | .8495 | .1505 | 53953 | 19114 | 1693  | 53947 | 19125 | 1688  | 240 | .02  |
| 75000 | .90 | .10 | 60750 | 13500 | 750   | .8997 | .1003 | 60542 | 13496 | 752   | 60539 | 13500 | 750   | 211 | .01  |
| 75000 | .95 | .05 | 67688 | 7125  | 188   | .9499 | .0501 | 67529 | 7124  | 188   | 67528 | 7125  | 188   | 159 | .00  |
| 76000 | .05 | .95 | 190   | 7220  | 68590 | .0497 | .9503 | 187   | 7171  | 68614 | 163   | 7220  | 68590 | 27  | 3.51 |
| 76000 | .10 | .90 | 760   | 13680 | 61560 | .0994 | .9006 | 750   | 13593 | 61604 | 706   | 13680 | 61560 | 54  | 3.12 |
| 76000 | .15 | .85 | 1710  | 19380 | 54910 | .1491 | .8509 | 1688  | 19264 | 54968 | 1630  | 19380 | 54910 | 80  | 2.75 |
| 76000 | .20 | .80 | 3040  | 24320 | 48640 | .1989 | .8011 | 3002  | 24184 | 48708 | 2934  | 24320 | 48640 | 106 | 2.39 |
| 76000 | .25 | .75 | 4750  | 28500 | 42750 | .2487 | .7513 | 4693  | 28353 | 42824 | 4619  | 28500 | 42750 | 131 | 2.05 |
| 76000 | .30 | .70 | 6840  | 31920 | 37240 | .2986 | .7014 | 6761  | 31768 | 37316 | 6685  | 31920 | 37240 | 155 | 1.73 |
| 76000 | .35 | .65 | 9310  | 34580 | 32110 | .3485 | .6515 | 9208  | 34430 | 32185 | 9133  | 34580 | 32110 | 177 | 1.44 |
| 76000 | .40 | .60 | 12160 | 36480 | 27360 | .3984 | .6016 | 12033 | 36337 | 27431 | 11962 | 36480 | 27360 | 198 | 1.17 |
| 76000 | .45 | .55 | 15390 | 37620 | 22990 | .4484 | .5516 | 15239 | 37488 | 23056 | 15173 | 37620 | 22990 | 217 | .94  |
| 76000 | .50 | .50 | 19000 | 38000 | 19000 | .4985 | .5015 | 18825 | 37883 | 19059 | 18766 | 38000 | 19000 | 234 | .73  |
| 76000 | .55 | .45 | 22990 | 37620 | 15390 | .5485 | .4515 | 22792 | 37519 | 15440 | 22742 | 37620 | 15390 | 248 | .55  |
| 76000 | .60 | .40 | 27360 | 36480 | 12160 | .5986 | .4014 | 27142 | 36397 | 12202 | 27101 | 36480 | 12160 | 259 | .40  |
| 76000 | .65 | .35 | 32110 | 34580 | 9310  | .6488 | .3512 | 31876 | 34514 | 9343  | 31843 | 34580 | 9310  | 267 | .27  |
| 76000 | .70 | .30 | 37240 | 31920 | 6840  | .6989 | .3011 | 36994 | 31871 | 6864  | 36970 | 31920 | 6840  | 270 | .18  |
| 76000 | .75 | .25 | 42750 | 28500 | 4750  | .7491 | .2509 | 42499 | 28466 | 4767  | 42482 | 28500 | 4750  | 268 | .11  |
| 76000 | .80 | .20 | 48640 | 24320 | 3040  | .7993 | .2007 | 48391 | 24299 | 3050  | 48381 | 24320 | 3040  | 259 | .06  |
| 76000 | .85 | .15 | 54910 | 19380 | 1710  | .8495 | .1505 | 54674 | 19369 | 1715  | 54668 | 19380 | 1710  | 242 | .02  |
| 76000 | .90 | .10 | 61560 | 13680 | 760   | .8997 | .1003 | 61350 | 13676 | 762   | 61348 | 13680 | 760   | 212 | .01  |

|       |     |     |       |       |       |       |       |       |       |       |       |       |       |     |      |
|-------|-----|-----|-------|-------|-------|-------|-------|-------|-------|-------|-------|-------|-------|-----|------|
| 76000 | .95 | .05 | 68590 | 7220  | 190   | .9499 | .0501 | 68430 | 7219  | 190   | 68430 | 7220  | 190   | 160 | .00  |
| 77000 | .05 | .95 | 193   | 7315  | 69493 | .0497 | .9503 | 190   | 7266  | 69517 | 165   | 7315  | 69493 | 27  | 3.51 |
| 77000 | .10 | .90 | 770   | 13860 | 62370 | .0994 | .9006 | 760   | 13772 | 62414 | 716   | 13860 | 62370 | 54  | 3.12 |
| 77000 | .15 | .85 | 1733  | 19635 | 55633 | .1491 | .8509 | 1710  | 19518 | 55691 | 1652  | 19635 | 55633 | 81  | 2.75 |
| 77000 | .20 | .80 | 3080  | 24640 | 49280 | .1989 | .8011 | 3042  | 24503 | 49348 | 2973  | 24640 | 49280 | 107 | 2.39 |
| 77000 | .25 | .75 | 4813  | 28875 | 43313 | .2487 | .7513 | 4755  | 28727 | 43387 | 4681  | 28875 | 43313 | 132 | 2.05 |
| 77000 | .30 | .70 | 6930  | 32340 | 37730 | .2986 | .7014 | 6851  | 32187 | 37806 | 6774  | 32340 | 37730 | 156 | 1.73 |
| 77000 | .35 | .65 | 9433  | 35035 | 32533 | .3485 | .6515 | 9330  | 34884 | 32608 | 9254  | 35035 | 32533 | 178 | 1.44 |
| 77000 | .40 | .60 | 12320 | 36960 | 27720 | .3984 | .6016 | 12193 | 36816 | 27792 | 12121 | 36960 | 27720 | 199 | 1.17 |
| 77000 | .45 | .55 | 15593 | 38115 | 23293 | .4484 | .5516 | 15440 | 37982 | 23359 | 15374 | 38115 | 23293 | 219 | .94  |
| 77000 | .50 | .50 | 19250 | 38500 | 19250 | .4985 | .5015 | 19074 | 38382 | 19309 | 19014 | 38500 | 19250 | 236 | .73  |
| 77000 | .55 | .45 | 23293 | 38115 | 15593 | .5485 | .4515 | 23093 | 38013 | 15643 | 23043 | 38115 | 15593 | 250 | .55  |
| 77000 | .60 | .40 | 27720 | 36960 | 12320 | .5986 | .4014 | 27501 | 36876 | 12362 | 27459 | 36960 | 12320 | 261 | .40  |
| 77000 | .65 | .35 | 32533 | 35035 | 9433  | .6488 | .3512 | 32297 | 34969 | 9466  | 32264 | 35035 | 9433  | 269 | .27  |
| 77000 | .70 | .30 | 37730 | 32340 | 6930  | .6989 | .3011 | 37483 | 32291 | 6955  | 37458 | 32340 | 6930  | 272 | .18  |
| 77000 | .75 | .25 | 43313 | 28875 | 4813  | .7491 | .2509 | 43060 | 28841 | 4829  | 43043 | 28875 | 4813  | 270 | .11  |
| 77000 | .80 | .20 | 49280 | 24640 | 3080  | .7993 | .2007 | 49029 | 24619 | 3090  | 49019 | 24640 | 3080  | 261 | .06  |
| 77000 | .85 | .15 | 55633 | 19635 | 1733  | .8495 | .1505 | 55394 | 19624 | 1738  | 55389 | 19635 | 1733  | 244 | .02  |
| 77000 | .90 | .10 | 62370 | 13860 | 770   | .8997 | .1003 | 62159 | 13856 | 772   | 62157 | 13860 | 770   | 213 | .01  |
| 77000 | .95 | .05 | 69493 | 7315  | 193   | .9499 | .0501 | 69332 | 7314  | 193   | 69331 | 7315  | 193   | 161 | .00  |
| 78000 | .05 | .95 | 195   | 7410  | 70395 | .0497 | .9503 | 192   | 7361  | 70420 | 168   | 7410  | 70395 | 27  | 3.51 |
| 78000 | .10 | .90 | 780   | 14040 | 63180 | .0994 | .9006 | 770   | 13952 | 63224 | 726   | 14040 | 63180 | 54  | 3.12 |
| 78000 | .15 | .85 | 1755  | 19890 | 56355 | .1491 | .8509 | 1733  | 19773 | 56414 | 1674  | 19890 | 56355 | 81  | 2.75 |
| 78000 | .20 | .80 | 3120  | 24960 | 49920 | .1989 | .8011 | 3081  | 24823 | 49989 | 3013  | 24960 | 49920 | 107 | 2.39 |
| 78000 | .25 | .75 | 4875  | 29250 | 43875 | .2487 | .7513 | 4817  | 29101 | 43950 | 4742  | 29250 | 43875 | 133 | 2.05 |
| 78000 | .30 | .70 | 7020  | 32760 | 38220 | .2986 | .7014 | 6940  | 32606 | 38297 | 6863  | 32760 | 38220 | 157 | 1.73 |
| 78000 | .35 | .65 | 9555  | 35490 | 32955 | .3485 | .6515 | 9452  | 35338 | 33031 | 9376  | 35490 | 32955 | 179 | 1.44 |
| 78000 | .40 | .60 | 12480 | 37440 | 28080 | .3985 | .6015 | 12352 | 37295 | 28152 | 12279 | 37440 | 28080 | 201 | 1.17 |
| 78000 | .45 | .55 | 15795 | 38610 | 23595 | .4484 | .5516 | 15642 | 38477 | 23662 | 15575 | 38610 | 23595 | 220 | .94  |
| 78000 | .50 | .50 | 19500 | 39000 | 19500 | .4985 | .5015 | 19322 | 38881 | 19559 | 19263 | 39000 | 19500 | 237 | .73  |
| 78000 | .55 | .45 | 23595 | 38610 | 15795 | .5485 | .4515 | 23395 | 38508 | 15846 | 23344 | 38610 | 15795 | 251 | .55  |
| 78000 | .60 | .40 | 28080 | 37440 | 12480 | .5986 | .4014 | 27859 | 37356 | 12522 | 27817 | 37440 | 12480 | 263 | .40  |
| 78000 | .65 | .35 | 32955 | 35490 | 9555  | .6488 | .3512 | 32718 | 35424 | 9588  | 32685 | 35490 | 9555  | 270 | .27  |

|       |     |     |       |       |       |       |       |       |       |       |       |       |       |     |      |
|-------|-----|-----|-------|-------|-------|-------|-------|-------|-------|-------|-------|-------|-------|-----|------|
| 78000 | .70 | .30 | 38220 | 32760 | 7020  | .6989 | .3011 | 37971 | 32711 | 7045  | 37946 | 32760 | 7020  | 274 | .18  |
| 78000 | .75 | .25 | 43875 | 29250 | 4875  | .7491 | .2509 | 43620 | 29216 | 4892  | 43603 | 29250 | 4875  | 272 | .11  |
| 78000 | .80 | .20 | 49920 | 24960 | 3120  | .7993 | .2007 | 49668 | 24939 | 3131  | 49657 | 24960 | 3120  | 263 | .06  |
| 78000 | .85 | .15 | 56355 | 19890 | 1755  | .8495 | .1505 | 56115 | 19879 | 1761  | 56110 | 19890 | 1755  | 245 | .02  |
| 78000 | .90 | .10 | 63180 | 14040 | 780   | .8997 | .1003 | 62967 | 14036 | 782   | 62965 | 14040 | 780   | 215 | .01  |
| 78000 | .95 | .05 | 70395 | 7410  | 195   | .9499 | .0501 | 70233 | 7409  | 195   | 70233 | 7410  | 195   | 162 | .00  |
| 79000 | .05 | .95 | 198   | 7505  | 71298 | .0497 | .9503 | 195   | 7455  | 71322 | 170   | 7505  | 71298 | 28  | 3.51 |
| 79000 | .10 | .90 | 790   | 14220 | 63990 | .0994 | .9006 | 780   | 14131 | 64034 | 735   | 14220 | 63990 | 55  | 3.12 |
| 79000 | .15 | .85 | 1778  | 20145 | 57078 | .1491 | .8509 | 1755  | 20027 | 57137 | 1696  | 20145 | 57078 | 82  | 2.75 |
| 79000 | .20 | .80 | 3160  | 25280 | 50560 | .1989 | .8011 | 3121  | 25142 | 50629 | 3052  | 25280 | 50560 | 108 | 2.39 |
| 79000 | .25 | .75 | 4938  | 29625 | 44438 | .2487 | .7513 | 4879  | 29475 | 44513 | 4804  | 29625 | 44438 | 133 | 2.05 |
| 79000 | .30 | .70 | 7110  | 33180 | 38710 | .2986 | .7014 | 7030  | 33025 | 38787 | 6952  | 33180 | 38710 | 158 | 1.73 |
| 79000 | .35 | .65 | 9678  | 35945 | 33378 | .3485 | .6515 | 9573  | 35792 | 33454 | 9497  | 35945 | 33378 | 181 | 1.44 |
| 79000 | .40 | .60 | 12640 | 37920 | 28440 | .3985 | .6015 | 12511 | 37774 | 28513 | 12438 | 37920 | 28440 | 202 | 1.17 |
| 79000 | .45 | .55 | 15998 | 39105 | 23898 | .4485 | .5515 | 15843 | 38971 | 23965 | 15776 | 39105 | 23898 | 221 | .94  |
| 79000 | .50 | .50 | 19750 | 39500 | 19750 | .4985 | .5015 | 19571 | 39380 | 19810 | 19511 | 39500 | 19750 | 239 | .73  |
| 79000 | .55 | .45 | 23898 | 39105 | 15998 | .5486 | .4514 | 23696 | 39002 | 16049 | 23644 | 39105 | 15998 | 253 | .55  |
| 79000 | .60 | .40 | 28440 | 37920 | 12640 | .5987 | .4013 | 28218 | 37835 | 12682 | 28176 | 37920 | 12640 | 264 | .40  |
| 79000 | .65 | .35 | 33378 | 35945 | 9678  | .6488 | .3512 | 33139 | 35878 | 9711  | 33105 | 35945 | 9678  | 272 | .27  |
| 79000 | .70 | .30 | 38710 | 33180 | 7110  | .6990 | .3010 | 38459 | 33130 | 7135  | 38435 | 33180 | 7110  | 275 | .18  |
| 79000 | .75 | .25 | 44438 | 29625 | 4938  | .7491 | .2509 | 44181 | 29591 | 4955  | 44164 | 29625 | 4938  | 273 | .11  |
| 79000 | .80 | .20 | 50560 | 25280 | 3160  | .7993 | .2007 | 50306 | 25259 | 3171  | 50296 | 25280 | 3160  | 264 | .06  |
| 79000 | .85 | .15 | 57078 | 20145 | 1778  | .8495 | .1505 | 56836 | 20134 | 1783  | 56831 | 20145 | 1778  | 247 | .02  |
| 79000 | .90 | .10 | 63990 | 14220 | 790   | .8997 | .1003 | 63776 | 14216 | 792   | 63774 | 14220 | 790   | 216 | .01  |
| 79000 | .95 | .05 | 71298 | 7505  | 198   | .9499 | .0501 | 71134 | 7504  | 198   | 71134 | 7505  | 198   | 163 | .00  |
| 80000 | .05 | .95 | 200   | 7600  | 72200 | .0497 | .9503 | 197   | 7550  | 72225 | 172   | 7600  | 72200 | 28  | 3.51 |
| 80000 | .10 | .90 | 800   | 14400 | 64800 | .0994 | .9006 | 790   | 14311 | 64845 | 745   | 14400 | 64800 | 55  | 3.12 |
| 80000 | .15 | .85 | 1800  | 20400 | 57800 | .1491 | .8509 | 1777  | 20281 | 57859 | 1718  | 20400 | 57800 | 82  | 2.75 |
| 80000 | .20 | .80 | 3200  | 25600 | 51200 | .1989 | .8011 | 3161  | 25461 | 51270 | 3091  | 25600 | 51200 | 109 | 2.39 |
| 80000 | .25 | .75 | 5000  | 30000 | 45000 | .2487 | .7513 | 4941  | 29849 | 45076 | 4866  | 30000 | 45000 | 134 | 2.05 |
| 80000 | .30 | .70 | 7200  | 33600 | 39200 | .2986 | .7014 | 7119  | 33444 | 39278 | 7041  | 33600 | 39200 | 159 | 1.73 |
| 80000 | .35 | .65 | 9800  | 36400 | 33800 | .3485 | .6515 | 9695  | 36246 | 33877 | 9618  | 36400 | 33800 | 182 | 1.44 |
| 80000 | .40 | .60 | 12800 | 38400 | 28800 | .3985 | .6015 | 12670 | 38253 | 28873 | 12597 | 38400 | 28800 | 203 | 1.17 |

|       |     |     |       |       |       |       |       |       |       |       |       |       |       |     |      |
|-------|-----|-----|-------|-------|-------|-------|-------|-------|-------|-------|-------|-------|-------|-----|------|
| 80000 | .45 | .55 | 16200 | 39600 | 24200 | .4485 | .5515 | 16045 | 39465 | 24268 | 15977 | 39600 | 24200 | 223 | .94  |
| 80000 | .50 | .50 | 20000 | 40000 | 20000 | .4985 | .5015 | 19820 | 39880 | 20060 | 19760 | 40000 | 20000 | 240 | .73  |
| 80000 | .55 | .45 | 24200 | 39600 | 16200 | .5486 | .4514 | 23997 | 39497 | 16252 | 23945 | 39600 | 16200 | 255 | .55  |
| 80000 | .60 | .40 | 28800 | 38400 | 12800 | .5987 | .4013 | 28577 | 38315 | 12843 | 28534 | 38400 | 12800 | 266 | .40  |
| 80000 | .65 | .35 | 33800 | 36400 | 9800  | .6488 | .3512 | 33560 | 36333 | 9834  | 33526 | 36400 | 9800  | 274 | .27  |
| 80000 | .70 | .30 | 39200 | 33600 | 7200  | .6990 | .3010 | 38948 | 33550 | 7225  | 38923 | 33600 | 7200  | 277 | .18  |
| 80000 | .75 | .25 | 45000 | 30000 | 5000  | .7491 | .2509 | 44742 | 29966 | 5017  | 44725 | 30000 | 5000  | 275 | .11  |
| 80000 | .80 | .20 | 51200 | 25600 | 3200  | .7993 | .2007 | 50945 | 25579 | 3211  | 50934 | 25600 | 3200  | 266 | .06  |
| 80000 | .85 | .15 | 57800 | 20400 | 1800  | .8495 | .1505 | 57557 | 20389 | 1806  | 57552 | 20400 | 1800  | 248 | .02  |
| 80000 | .90 | .10 | 64800 | 14400 | 800   | .8997 | .1003 | 64585 | 14396 | 802   | 64583 | 14400 | 800   | 217 | .01  |
| 80000 | .95 | .05 | 72200 | 7600  | 200   | .9499 | .0501 | 72036 | 7599  | 200   | 72036 | 7600  | 200   | 164 | .00  |
| 81000 | .05 | .95 | 203   | 7695  | 73103 | .0497 | .9503 | 200   | 7645  | 73128 | 175   | 7695  | 73103 | 28  | 3.51 |
| 81000 | .10 | .90 | 810   | 14580 | 65610 | .0994 | .9006 | 799   | 14490 | 65655 | 754   | 14580 | 65610 | 56  | 3.12 |
| 81000 | .15 | .85 | 1823  | 20655 | 58523 | .1491 | .8509 | 1800  | 20535 | 58582 | 1740  | 20655 | 58523 | 83  | 2.75 |
| 81000 | .20 | .80 | 3240  | 25920 | 51840 | .1989 | .8011 | 3201  | 25780 | 51910 | 3131  | 25920 | 51840 | 109 | 2.39 |
| 81000 | .25 | .75 | 5063  | 30375 | 45563 | .2487 | .7513 | 5004  | 30223 | 45639 | 4927  | 30375 | 45563 | 135 | 2.05 |
| 81000 | .30 | .70 | 7290  | 34020 | 39690 | .2986 | .7014 | 7209  | 33863 | 39768 | 7130  | 34020 | 39690 | 160 | 1.73 |
| 81000 | .35 | .65 | 9923  | 36855 | 34223 | .3485 | .6515 | 9817  | 36700 | 34300 | 9740  | 36855 | 34223 | 183 | 1.44 |
| 81000 | .40 | .60 | 12960 | 38880 | 29160 | .3985 | .6015 | 12829 | 38732 | 29234 | 12755 | 38880 | 29160 | 205 | 1.17 |
| 81000 | .45 | .55 | 16403 | 40095 | 24503 | .4485 | .5515 | 16246 | 39959 | 24570 | 16178 | 40095 | 24503 | 224 | .94  |
| 81000 | .50 | .50 | 20250 | 40500 | 20250 | .4985 | .5015 | 20069 | 40379 | 20311 | 20008 | 40500 | 20250 | 242 | .73  |
| 81000 | .55 | .45 | 24503 | 40095 | 16403 | .5486 | .4514 | 24298 | 39991 | 16455 | 24246 | 40095 | 16403 | 256 | .55  |
| 81000 | .60 | .40 | 29160 | 38880 | 12960 | .5987 | .4013 | 28935 | 38794 | 13003 | 28892 | 38880 | 12960 | 268 | .40  |
| 81000 | .65 | .35 | 34223 | 36855 | 9923  | .6488 | .3512 | 33981 | 36787 | 9956  | 33947 | 36855 | 9923  | 276 | .27  |
| 81000 | .70 | .30 | 39690 | 34020 | 7290  | .6990 | .3010 | 39436 | 33970 | 7315  | 39411 | 34020 | 7290  | 279 | .18  |
| 81000 | .75 | .25 | 45563 | 30375 | 5063  | .7491 | .2509 | 45303 | 30340 | 5080  | 45286 | 30375 | 5063  | 277 | .11  |
| 81000 | .80 | .20 | 51840 | 25920 | 3240  | .7993 | .2007 | 51583 | 25899 | 3251  | 51572 | 25920 | 3240  | 268 | .06  |
| 81000 | .85 | .15 | 58523 | 20655 | 1823  | .8495 | .1505 | 58278 | 20644 | 1828  | 58273 | 20655 | 1823  | 250 | .02  |
| 81000 | .90 | .10 | 65610 | 14580 | 810   | .8997 | .1003 | 65393 | 14576 | 812   | 65391 | 14580 | 810   | 219 | .01  |
| 81000 | .95 | .05 | 73103 | 7695  | 203   | .9499 | .0501 | 72937 | 7694  | 203   | 72937 | 7695  | 203   | 165 | .00  |
| 82000 | .05 | .95 | 205   | 7790  | 74005 | .0497 | .9503 | 202   | 7739  | 74030 | 177   | 7790  | 74005 | 28  | 3.50 |
| 82000 | .10 | .90 | 820   | 14760 | 66420 | .0994 | .9006 | 809   | 14669 | 66465 | 764   | 14760 | 66420 | 56  | 3.12 |
| 82000 | .15 | .85 | 1845  | 20910 | 59245 | .1491 | .8509 | 1822  | 20790 | 59305 | 1762  | 20910 | 59245 | 83  | 2.75 |

|       |     |     |       |       |       |       |       |       |       |       |       |       |       |     |      |
|-------|-----|-----|-------|-------|-------|-------|-------|-------|-------|-------|-------|-------|-------|-----|------|
| 82000 | .20 | .80 | 3280  | 26240 | 52480 | .1989 | .8011 | 3241  | 26099 | 52550 | 3170  | 26240 | 52480 | 110 | 2.39 |
| 82000 | .25 | .75 | 5125  | 30750 | 46125 | .2488 | .7512 | 5066  | 30597 | 46202 | 4989  | 30750 | 46125 | 136 | 2.05 |
| 82000 | .30 | .70 | 7380  | 34440 | 40180 | .2986 | .7014 | 7298  | 34282 | 40259 | 7219  | 34440 | 40180 | 161 | 1.73 |
| 82000 | .35 | .65 | 10045 | 37310 | 34645 | .3485 | .6515 | 9939  | 37154 | 34723 | 9861  | 37310 | 34645 | 184 | 1.44 |
| 82000 | .40 | .60 | 13120 | 39360 | 29520 | .3985 | .6015 | 12988 | 39211 | 29594 | 12914 | 39360 | 29520 | 206 | 1.17 |
| 82000 | .45 | .55 | 16605 | 40590 | 24805 | .4485 | .5515 | 16448 | 40453 | 24873 | 16379 | 40590 | 24805 | 226 | .94  |
| 82000 | .50 | .50 | 20500 | 41000 | 20500 | .4985 | .5015 | 20318 | 40878 | 20561 | 20257 | 41000 | 20500 | 243 | .73  |
| 82000 | .55 | .45 | 24805 | 40590 | 16605 | .5486 | .4514 | 24600 | 40485 | 16657 | 24547 | 40590 | 16605 | 258 | .55  |
| 82000 | .60 | .40 | 29520 | 39360 | 13120 | .5987 | .4013 | 29294 | 39274 | 13163 | 29251 | 39360 | 13120 | 269 | .40  |
| 82000 | .65 | .35 | 34645 | 37310 | 10045 | .6488 | .3512 | 34402 | 37242 | 10079 | 34368 | 37310 | 10045 | 277 | .27  |
| 82000 | .70 | .30 | 40180 | 34440 | 7380  | .6990 | .3010 | 39925 | 34389 | 7405  | 39899 | 34440 | 7380  | 281 | .18  |
| 82000 | .75 | .25 | 46125 | 30750 | 5125  | .7491 | .2509 | 45864 | 30715 | 5142  | 45847 | 30750 | 5125  | 278 | .11  |
| 82000 | .80 | .20 | 52480 | 26240 | 3280  | .7993 | .2007 | 52221 | 26218 | 3291  | 52211 | 26240 | 3280  | 269 | .06  |
| 82000 | .85 | .15 | 59245 | 20910 | 1845  | .8495 | .1505 | 58999 | 20899 | 1851  | 58994 | 20910 | 1845  | 251 | .02  |
| 82000 | .90 | .10 | 66420 | 14760 | 820   | .8997 | .1003 | 66202 | 14756 | 822   | 66200 | 14760 | 820   | 220 | .01  |
| 82000 | .95 | .05 | 74005 | 7790  | 205   | .9499 | .0501 | 73839 | 7789  | 205   | 73839 | 7790  | 205   | 166 | .00  |
| 83000 | .05 | .95 | 208   | 7885  | 74908 | .0497 | .9503 | 205   | 7834  | 74933 | 179   | 7885  | 74908 | 28  | 3.50 |
| 83000 | .10 | .90 | 830   | 14940 | 67230 | .0994 | .9006 | 819   | 14849 | 67276 | 774   | 14940 | 67230 | 56  | 3.12 |
| 83000 | .15 | .85 | 1868  | 21165 | 59968 | .1491 | .8509 | 1844  | 21044 | 60028 | 1784  | 21165 | 59968 | 84  | 2.75 |
| 83000 | .20 | .80 | 3320  | 26560 | 53120 | .1989 | .8011 | 3280  | 26418 | 53191 | 3209  | 26560 | 53120 | 111 | 2.39 |
| 83000 | .25 | .75 | 5188  | 31125 | 46688 | .2488 | .7512 | 5128  | 30971 | 46765 | 5051  | 31125 | 46688 | 137 | 2.05 |
| 83000 | .30 | .70 | 7470  | 34860 | 40670 | .2986 | .7014 | 7388  | 34701 | 40749 | 7308  | 34860 | 40670 | 162 | 1.73 |
| 83000 | .35 | .65 | 10168 | 37765 | 35068 | .3485 | .6515 | 10061 | 37608 | 35146 | 9982  | 37765 | 35068 | 185 | 1.44 |
| 83000 | .40 | .60 | 13280 | 39840 | 29880 | .3985 | .6015 | 13148 | 39691 | 29955 | 13073 | 39840 | 29880 | 207 | 1.17 |
| 83000 | .45 | .55 | 16808 | 41085 | 25108 | .4485 | .5515 | 16649 | 40947 | 25176 | 16581 | 41085 | 25108 | 227 | .94  |
| 83000 | .50 | .50 | 20750 | 41500 | 20750 | .4985 | .5015 | 20567 | 41377 | 20811 | 20505 | 41500 | 20750 | 245 | .73  |
| 83000 | .55 | .45 | 25108 | 41085 | 16808 | .5486 | .4514 | 24901 | 40980 | 16860 | 24848 | 41085 | 16808 | 259 | .55  |
| 83000 | .60 | .40 | 29880 | 39840 | 13280 | .5987 | .4013 | 29652 | 39753 | 13324 | 29609 | 39840 | 13280 | 271 | .40  |
| 83000 | .65 | .35 | 35068 | 37765 | 10168 | .6488 | .3512 | 34823 | 37696 | 10202 | 34789 | 37765 | 10168 | 279 | .27  |
| 83000 | .70 | .30 | 40670 | 34860 | 7470  | .6990 | .3010 | 40413 | 34809 | 7495  | 40388 | 34860 | 7470  | 282 | .18  |
| 83000 | .75 | .25 | 46688 | 31125 | 5188  | .7492 | .2508 | 46425 | 31090 | 5205  | 46407 | 31125 | 5188  | 280 | .11  |
| 83000 | .80 | .20 | 53120 | 26560 | 3320  | .7993 | .2007 | 52860 | 26538 | 3331  | 52849 | 26560 | 3320  | 271 | .06  |
| 83000 | .85 | .15 | 59968 | 21165 | 1868  | .8495 | .1505 | 59720 | 21154 | 1873  | 59715 | 21165 | 1868  | 253 | .02  |



|       |     |     |       |       |       |       |       |       |       |       |       |       |       |     |      |
|-------|-----|-----|-------|-------|-------|-------|-------|-------|-------|-------|-------|-------|-------|-----|------|
| 83000 | .90 | .10 | 67230 | 14940 | 830   | .8997 | .1003 | 67011 | 14936 | 832   | 67008 | 14940 | 830   | 222 | .01  |
| 83000 | .95 | .05 | 74908 | 7885  | 208   | .9499 | .0501 | 74740 | 7884  | 208   | 74740 | 7885  | 208   | 168 | .00  |
| 84000 | .05 | .95 | 210   | 7980  | 75810 | .0497 | .9503 | 207   | 7929  | 75836 | 182   | 7980  | 75810 | 28  | 3.50 |
| 84000 | .10 | .90 | 840   | 15120 | 68040 | .0994 | .9006 | 829   | 15028 | 68086 | 783   | 15120 | 68040 | 57  | 3.12 |
| 84000 | .15 | .85 | 1890  | 21420 | 60690 | .1491 | .8509 | 1867  | 21298 | 60751 | 1806  | 21420 | 60690 | 84  | 2.75 |
| 84000 | .20 | .80 | 3360  | 26880 | 53760 | .1989 | .8011 | 3320  | 26737 | 53831 | 3249  | 26880 | 53760 | 111 | 2.39 |
| 84000 | .25 | .75 | 5250  | 31500 | 47250 | .2488 | .7512 | 5190  | 31345 | 47327 | 5112  | 31500 | 47250 | 138 | 2.05 |
| 84000 | .30 | .70 | 7560  | 35280 | 41160 | .2986 | .7014 | 7477  | 35120 | 41240 | 7397  | 35280 | 41160 | 163 | 1.73 |
| 84000 | .35 | .65 | 10290 | 38220 | 35490 | .3486 | .6514 | 10183 | 38062 | 35569 | 10104 | 38220 | 35490 | 186 | 1.44 |
| 84000 | .40 | .60 | 13440 | 40320 | 30240 | .3985 | .6015 | 13307 | 40170 | 30315 | 13232 | 40320 | 30240 | 208 | 1.17 |
| 84000 | .45 | .55 | 17010 | 41580 | 25410 | .4485 | .5515 | 16851 | 41442 | 25479 | 16782 | 41580 | 25410 | 228 | .94  |
| 84000 | .50 | .50 | 21000 | 42000 | 21000 | .4985 | .5015 | 20816 | 41877 | 21062 | 20754 | 42000 | 21000 | 246 | .73  |
| 84000 | .55 | .45 | 25410 | 41580 | 17010 | .5486 | .4514 | 25202 | 41474 | 17063 | 25149 | 41580 | 17010 | 261 | .55  |
| 84000 | .60 | .40 | 30240 | 40320 | 13440 | .5987 | .4013 | 30011 | 40232 | 13484 | 29967 | 40320 | 13440 | 273 | .40  |
| 84000 | .65 | .35 | 35490 | 38220 | 10290 | .6488 | .3512 | 35244 | 38151 | 10324 | 35209 | 38220 | 10290 | 281 | .27  |
| 84000 | .70 | .30 | 41160 | 35280 | 7560  | .6990 | .3010 | 40902 | 35229 | 7586  | 40876 | 35280 | 7560  | 284 | .18  |
| 84000 | .75 | .25 | 47250 | 31500 | 5250  | .7492 | .2508 | 46986 | 31465 | 5268  | 46968 | 31500 | 5250  | 282 | .11  |
| 84000 | .80 | .20 | 53760 | 26880 | 3360  | .7993 | .2007 | 53498 | 26858 | 3371  | 53487 | 26880 | 3360  | 273 | .06  |
| 84000 | .85 | .15 | 60690 | 21420 | 1890  | .8495 | .1505 | 60441 | 21409 | 1896  | 60436 | 21420 | 1890  | 254 | .02  |
| 84000 | .90 | .10 | 68040 | 15120 | 840   | .8997 | .1003 | 67819 | 15116 | 842   | 67817 | 15120 | 840   | 223 | .01  |
| 84000 | .95 | .05 | 75810 | 7980  | 210   | .9499 | .0501 | 75642 | 7979  | 210   | 75641 | 7980  | 210   | 169 | .00  |
| 85000 | .05 | .95 | 213   | 8075  | 76713 | .0497 | .9503 | 210   | 8023  | 76738 | 184   | 8075  | 76713 | 29  | 3.50 |
| 85000 | .10 | .90 | 850   | 15300 | 68850 | .0994 | .9006 | 839   | 15208 | 68896 | 793   | 15300 | 68850 | 57  | 3.12 |
| 85000 | .15 | .85 | 1913  | 21675 | 61413 | .1492 | .8508 | 1889  | 21552 | 61474 | 1828  | 21675 | 61413 | 85  | 2.75 |
| 85000 | .20 | .80 | 3400  | 27200 | 54400 | .1989 | .8011 | 3360  | 27056 | 54472 | 3288  | 27200 | 54400 | 112 | 2.39 |
| 85000 | .25 | .75 | 5313  | 31875 | 47813 | .2488 | .7512 | 5252  | 31719 | 47890 | 5174  | 31875 | 47813 | 138 | 2.05 |
| 85000 | .30 | .70 | 7650  | 35700 | 41650 | .2987 | .7013 | 7567  | 35539 | 41730 | 7486  | 35700 | 41650 | 164 | 1.73 |
| 85000 | .35 | .65 | 10413 | 38675 | 35913 | .3486 | .6514 | 10304 | 38516 | 35992 | 10225 | 38675 | 35913 | 187 | 1.44 |
| 85000 | .40 | .60 | 13600 | 40800 | 30600 | .3985 | .6015 | 13466 | 40649 | 30676 | 13391 | 40800 | 30600 | 209 | 1.17 |
| 85000 | .45 | .55 | 17213 | 42075 | 25713 | .4485 | .5515 | 17053 | 41936 | 25782 | 16983 | 42075 | 25713 | 230 | .94  |
| 85000 | .50 | .50 | 21250 | 42500 | 21250 | .4985 | .5015 | 21065 | 42376 | 21312 | 21003 | 42500 | 21250 | 247 | .73  |
| 85000 | .55 | .45 | 25713 | 42075 | 17213 | .5486 | .4514 | 25503 | 41968 | 17266 | 25450 | 42075 | 17213 | 262 | .55  |
| 85000 | .60 | .40 | 30600 | 40800 | 13600 | .5987 | .4013 | 30370 | 40712 | 13644 | 30326 | 40800 | 13600 | 274 | .40  |

|       |     |     |       |       |       |       |       |       |       |       |       |       |       |     |      |
|-------|-----|-----|-------|-------|-------|-------|-------|-------|-------|-------|-------|-------|-------|-----|------|
| 85000 | .65 | .35 | 35913 | 38675 | 10413 | .6488 | .3512 | 35665 | 38606 | 10447 | 35630 | 38675 | 10413 | 282 | .27  |
| 85000 | .70 | .30 | 41650 | 35700 | 7650  | .6990 | .3010 | 41390 | 35648 | 7676  | 41364 | 35700 | 7650  | 286 | .18  |
| 85000 | .75 | .25 | 47813 | 31875 | 5313  | .7492 | .2508 | 47547 | 31839 | 5330  | 47529 | 31875 | 5313  | 283 | .11  |
| 85000 | .80 | .20 | 54400 | 27200 | 3400  | .7994 | .2006 | 54137 | 27178 | 3411  | 54126 | 27200 | 3400  | 274 | .06  |
| 85000 | .85 | .15 | 61413 | 21675 | 1913  | .8495 | .1505 | 61162 | 21663 | 1918  | 61157 | 21675 | 1913  | 256 | .02  |
| 85000 | .90 | .10 | 68850 | 15300 | 850   | .8997 | .1003 | 68628 | 15296 | 852   | 68626 | 15300 | 850   | 224 | .01  |
| 85000 | .95 | .05 | 76713 | 8075  | 213   | .9499 | .0501 | 76543 | 8074  | 213   | 76543 | 8075  | 213   | 170 | .00  |
| 86000 | .05 | .95 | 215   | 8170  | 77615 | .0497 | .9503 | 212   | 8118  | 77641 | 186   | 8170  | 77615 | 29  | 3.50 |
| 86000 | .10 | .90 | 860   | 15480 | 69660 | .0994 | .9006 | 849   | 15387 | 69706 | 803   | 15480 | 69660 | 57  | 3.12 |
| 86000 | .15 | .85 | 1935  | 21930 | 62135 | .1492 | .8508 | 1911  | 21807 | 62197 | 1850  | 21930 | 62135 | 85  | 2.75 |
| 86000 | .20 | .80 | 3440  | 27520 | 55040 | .1990 | .8010 | 3400  | 27376 | 55112 | 3327  | 27520 | 55040 | 113 | 2.39 |
| 86000 | .25 | .75 | 5375  | 32250 | 48375 | .2488 | .7512 | 5314  | 32093 | 48453 | 5236  | 32250 | 48375 | 139 | 2.05 |
| 86000 | .30 | .70 | 7740  | 36120 | 42140 | .2987 | .7013 | 7656  | 35958 | 42221 | 7576  | 36120 | 42140 | 164 | 1.73 |
| 86000 | .35 | .65 | 10535 | 39130 | 36335 | .3486 | .6514 | 10426 | 38970 | 36415 | 10347 | 39130 | 36335 | 188 | 1.44 |
| 86000 | .40 | .60 | 13760 | 41280 | 30960 | .3985 | .6015 | 13625 | 41128 | 31036 | 13549 | 41280 | 30960 | 211 | 1.17 |
| 86000 | .45 | .55 | 17415 | 42570 | 26015 | .4485 | .5515 | 17254 | 42430 | 26085 | 17184 | 42570 | 26015 | 231 | .94  |
| 86000 | .50 | .50 | 21500 | 43000 | 21500 | .4985 | .5015 | 21314 | 42875 | 21562 | 21251 | 43000 | 21500 | 249 | .73  |
| 86000 | .55 | .45 | 26015 | 42570 | 17415 | .5486 | .4514 | 25805 | 42463 | 17469 | 25751 | 42570 | 17415 | 264 | .55  |
| 86000 | .60 | .40 | 30960 | 41280 | 13760 | .5987 | .4013 | 30728 | 41191 | 13804 | 30684 | 41280 | 13760 | 276 | .40  |
| 86000 | .65 | .35 | 36335 | 39130 | 10535 | .6488 | .3512 | 36086 | 39060 | 10570 | 36051 | 39130 | 10535 | 284 | .27  |
| 86000 | .70 | .30 | 42140 | 36120 | 7740  | .6990 | .3010 | 41879 | 36068 | 7766  | 41853 | 36120 | 7740  | 287 | .18  |
| 86000 | .75 | .25 | 48375 | 32250 | 5375  | .7492 | .2508 | 48108 | 32214 | 5393  | 48090 | 32250 | 5375  | 285 | .11  |
| 86000 | .80 | .20 | 55040 | 27520 | 3440  | .7994 | .2006 | 54775 | 27498 | 3451  | 54764 | 27520 | 3440  | 276 | .06  |
| 86000 | .85 | .15 | 62135 | 21930 | 1935  | .8495 | .1505 | 61883 | 21918 | 1941  | 61878 | 21930 | 1935  | 257 | .02  |
| 86000 | .90 | .10 | 69660 | 15480 | 860   | .8997 | .1003 | 69437 | 15475 | 862   | 69435 | 15480 | 860   | 225 | .01  |
| 86000 | .95 | .05 | 77615 | 8170  | 215   | .9499 | .0501 | 77445 | 8169  | 215   | 77444 | 8170  | 215   | 171 | .00  |
| 87000 | .05 | .95 | 218   | 8265  | 78518 | .0497 | .9503 | 215   | 8213  | 78544 | 189   | 8265  | 78518 | 29  | 3.50 |
| 87000 | .10 | .90 | 870   | 15660 | 70470 | .0994 | .9006 | 859   | 15567 | 70517 | 812   | 15660 | 70470 | 58  | 3.12 |
| 87000 | .15 | .85 | 1958  | 22185 | 62858 | .1492 | .8508 | 1934  | 22061 | 62920 | 1872  | 22185 | 62858 | 86  | 2.75 |
| 87000 | .20 | .80 | 3480  | 27840 | 55680 | .1990 | .8010 | 3439  | 27695 | 55753 | 3367  | 27840 | 55680 | 113 | 2.39 |
| 87000 | .25 | .75 | 5438  | 32625 | 48938 | .2488 | .7512 | 5376  | 32467 | 49016 | 5298  | 32625 | 48938 | 140 | 2.05 |
| 87000 | .30 | .70 | 7830  | 36540 | 42630 | .2987 | .7013 | 7746  | 36378 | 42711 | 7665  | 36540 | 42630 | 165 | 1.73 |
| 87000 | .35 | .65 | 10658 | 39585 | 36758 | .3486 | .6514 | 10548 | 39424 | 36838 | 10468 | 39585 | 36758 | 190 | 1.44 |

|       |     |     |       |       |       |       |       |       |       |       |       |       |       |     |      |
|-------|-----|-----|-------|-------|-------|-------|-------|-------|-------|-------|-------|-------|-------|-----|------|
| 87000 | .40 | .60 | 13920 | 41760 | 31320 | .3985 | .6015 | 13785 | 41607 | 31396 | 13708 | 41760 | 31320 | 212 | 1.17 |
| 87000 | .45 | .55 | 17618 | 43065 | 26318 | .4485 | .5515 | 17456 | 42924 | 26388 | 17385 | 43065 | 26318 | 232 | .94  |
| 87000 | .50 | .50 | 21750 | 43500 | 21750 | .4986 | .5014 | 21562 | 43374 | 21813 | 21500 | 43500 | 21750 | 250 | .73  |
| 87000 | .55 | .45 | 26318 | 43065 | 17618 | .5486 | .4514 | 26106 | 42957 | 17671 | 26052 | 43065 | 17618 | 266 | .55  |
| 87000 | .60 | .40 | 31320 | 41760 | 13920 | .5987 | .4013 | 31087 | 41671 | 13965 | 31043 | 41760 | 13920 | 277 | .40  |
| 87000 | .65 | .35 | 36758 | 39585 | 10658 | .6488 | .3512 | 36507 | 39515 | 10693 | 36472 | 39585 | 10658 | 286 | .27  |
| 87000 | .70 | .30 | 42630 | 36540 | 7830  | .6990 | .3010 | 42367 | 36488 | 7856  | 42341 | 36540 | 7830  | 289 | .18  |
| 87000 | .75 | .25 | 48938 | 32625 | 5438  | .7492 | .2508 | 48669 | 32589 | 5455  | 48651 | 32625 | 5438  | 287 | .11  |
| 87000 | .80 | .20 | 55680 | 27840 | 3480  | .7994 | .2006 | 55414 | 27818 | 3491  | 55403 | 27840 | 3480  | 277 | .06  |
| 87000 | .85 | .15 | 62858 | 22185 | 1958  | .8496 | .1504 | 62604 | 22173 | 1963  | 62599 | 22185 | 1958  | 259 | .02  |
| 87000 | .90 | .10 | 70470 | 15660 | 870   | .8997 | .1003 | 70245 | 15655 | 872   | 70243 | 15660 | 870   | 227 | .01  |
| 87000 | .95 | .05 | 78518 | 8265  | 218   | .9499 | .0501 | 78346 | 8264  | 218   | 78346 | 8265  | 218   | 171 | .00  |
| 88000 | .05 | .95 | 220   | 8360  | 79420 | .0497 | .9503 | 217   | 8308  | 79446 | 191   | 8360  | 79420 | 29  | 3.50 |
| 88000 | .10 | .90 | 880   | 15840 | 71280 | .0994 | .9006 | 869   | 15746 | 71327 | 822   | 15840 | 71280 | 58  | 3.12 |
| 88000 | .15 | .85 | 1980  | 22440 | 63580 | .1492 | .8508 | 1956  | 22315 | 63642 | 1894  | 22440 | 63580 | 86  | 2.75 |
| 88000 | .20 | .80 | 3520  | 28160 | 56320 | .1990 | .8010 | 3479  | 28014 | 56393 | 3406  | 28160 | 56320 | 114 | 2.39 |
| 88000 | .25 | .75 | 5500  | 33000 | 49500 | .2488 | .7512 | 5439  | 32841 | 49579 | 5359  | 33000 | 49500 | 141 | 2.05 |
| 88000 | .30 | .70 | 7920  | 36960 | 43120 | .2987 | .7013 | 7835  | 36797 | 43202 | 7754  | 36960 | 43120 | 166 | 1.73 |
| 88000 | .35 | .65 | 10780 | 40040 | 37180 | .3486 | .6514 | 10670 | 39879 | 37261 | 10589 | 40040 | 37180 | 191 | 1.44 |
| 88000 | .40 | .60 | 14080 | 42240 | 31680 | .3985 | .6015 | 13944 | 42086 | 31757 | 13867 | 42240 | 31680 | 213 | 1.17 |
| 88000 | .45 | .55 | 17820 | 43560 | 26620 | .4485 | .5515 | 17657 | 43418 | 26691 | 17586 | 43560 | 26620 | 234 | .94  |
| 88000 | .50 | .50 | 22000 | 44000 | 22000 | .4986 | .5014 | 21811 | 43874 | 22063 | 21748 | 44000 | 22000 | 252 | .73  |
| 88000 | .55 | .45 | 26620 | 43560 | 17820 | .5486 | .4514 | 26407 | 43452 | 17874 | 26353 | 43560 | 17820 | 267 | .55  |
| 88000 | .60 | .40 | 31680 | 42240 | 14080 | .5987 | .4013 | 31446 | 42150 | 14125 | 31401 | 42240 | 14080 | 279 | .40  |
| 88000 | .65 | .35 | 37180 | 40040 | 10780 | .6489 | .3511 | 36928 | 39969 | 10815 | 36893 | 40040 | 10780 | 287 | .27  |
| 88000 | .70 | .30 | 43120 | 36960 | 7920  | .6990 | .3010 | 42856 | 36908 | 7946  | 42829 | 36960 | 7920  | 291 | .18  |
| 88000 | .75 | .25 | 49500 | 33000 | 5500  | .7492 | .2508 | 49230 | 32964 | 5518  | 49212 | 33000 | 5500  | 288 | .11  |
| 88000 | .80 | .20 | 56320 | 28160 | 3520  | .7994 | .2006 | 56052 | 28138 | 3531  | 56041 | 28160 | 3520  | 279 | .06  |
| 88000 | .85 | .15 | 63580 | 22440 | 1980  | .8496 | .1504 | 63326 | 22428 | 1986  | 63320 | 22440 | 1980  | 260 | .02  |
| 88000 | .90 | .10 | 71280 | 15840 | 880   | .8997 | .1003 | 71054 | 15835 | 882   | 71052 | 15840 | 880   | 228 | .01  |
| 88000 | .95 | .05 | 79420 | 8360  | 220   | .9499 | .0501 | 79248 | 8359  | 220   | 79248 | 8360  | 220   | 172 | .00  |
| 89000 | .05 | .95 | 223   | 8455  | 80323 | .0497 | .9503 | 220   | 8402  | 80349 | 193   | 8455  | 80323 | 29  | 3.50 |
| 89000 | .10 | .90 | 890   | 16020 | 72090 | .0994 | .9006 | 879   | 15926 | 72137 | 832   | 16020 | 72090 | 58  | 3.12 |

|       |     |     |       |       |       |       |       |       |       |       |       |       |       |     |      |
|-------|-----|-----|-------|-------|-------|-------|-------|-------|-------|-------|-------|-------|-------|-----|------|
| 89000 | .15 | .85 | 2003  | 22695 | 64303 | .1492 | .8508 | 1978  | 22570 | 64365 | 1916  | 22695 | 64303 | 87  | 2.75 |
| 89000 | .20 | .80 | 3560  | 28480 | 56960 | .1990 | .8010 | 3519  | 28333 | 57033 | 3445  | 28480 | 56960 | 115 | 2.39 |
| 89000 | .25 | .75 | 5563  | 33375 | 50063 | .2488 | .7512 | 5501  | 33216 | 50142 | 5421  | 33375 | 50063 | 142 | 2.05 |
| 89000 | .30 | .70 | 8010  | 37380 | 43610 | .2987 | .7013 | 7925  | 37216 | 43692 | 7843  | 37380 | 43610 | 167 | 1.73 |
| 89000 | .35 | .65 | 10903 | 40495 | 37603 | .3486 | .6514 | 10792 | 40333 | 37684 | 10711 | 40495 | 37603 | 192 | 1.44 |
| 89000 | .40 | .60 | 14240 | 42720 | 32040 | .3986 | .6014 | 14103 | 42565 | 32117 | 14026 | 42720 | 32040 | 214 | 1.17 |
| 89000 | .45 | .55 | 18023 | 44055 | 26923 | .4485 | .5515 | 17859 | 43912 | 26994 | 17788 | 44055 | 26923 | 235 | .94  |
| 89000 | .50 | .50 | 22250 | 44500 | 22250 | .4986 | .5014 | 22060 | 44373 | 22313 | 21997 | 44500 | 22250 | 253 | .73  |
| 89000 | .55 | .45 | 26923 | 44055 | 18023 | .5486 | .4514 | 26708 | 43946 | 18077 | 26654 | 44055 | 18023 | 269 | .55  |
| 89000 | .60 | .40 | 32040 | 42720 | 14240 | .5987 | .4013 | 31804 | 42630 | 14285 | 31759 | 42720 | 14240 | 281 | .40  |
| 89000 | .65 | .35 | 37603 | 40495 | 10903 | .6489 | .3511 | 37349 | 40424 | 10938 | 37314 | 40495 | 10903 | 289 | .27  |
| 89000 | .70 | .30 | 43610 | 37380 | 8010  | .6990 | .3010 | 43344 | 37327 | 8036  | 43318 | 37380 | 8010  | 292 | .18  |
| 89000 | .75 | .25 | 50063 | 33375 | 5563  | .7492 | .2508 | 49791 | 33339 | 5581  | 49772 | 33375 | 5563  | 290 | .11  |
| 89000 | .80 | .20 | 56960 | 28480 | 3560  | .7994 | .2006 | 56691 | 28457 | 3571  | 56679 | 28480 | 3560  | 281 | .06  |
| 89000 | .85 | .15 | 64303 | 22695 | 2003  | .8496 | .1504 | 64047 | 22683 | 2008  | 64041 | 22695 | 2003  | 262 | .02  |
| 89000 | .90 | .10 | 72090 | 16020 | 890   | .8997 | .1003 | 71863 | 16015 | 892   | 71861 | 16020 | 890   | 229 | .01  |
| 89000 | .95 | .05 | 80323 | 8455  | 223   | .9499 | .0501 | 80149 | 8454  | 223   | 80149 | 8455  | 223   | 173 | .00  |
| 90000 | .05 | .95 | 225   | 8550  | 81225 | .0497 | .9503 | 222   | 8497  | 81252 | 196   | 8550  | 81225 | 29  | 3.50 |
| 90000 | .10 | .90 | 900   | 16200 | 72900 | .0994 | .9006 | 889   | 16105 | 72947 | 841   | 16200 | 72900 | 59  | 3.12 |
| 90000 | .15 | .85 | 2025  | 22950 | 65025 | .1492 | .8508 | 2001  | 22824 | 65088 | 1938  | 22950 | 65025 | 87  | 2.75 |
| 90000 | .20 | .80 | 3600  | 28800 | 57600 | .1990 | .8010 | 3559  | 28652 | 57674 | 3485  | 28800 | 57600 | 115 | 2.39 |
| 90000 | .25 | .75 | 5625  | 33750 | 50625 | .2488 | .7512 | 5563  | 33590 | 50705 | 5483  | 33750 | 50625 | 142 | 2.05 |
| 90000 | .30 | .70 | 8100  | 37800 | 44100 | .2987 | .7013 | 8014  | 37635 | 44183 | 7932  | 37800 | 44100 | 168 | 1.73 |
| 90000 | .35 | .65 | 11025 | 40950 | 38025 | .3486 | .6514 | 10914 | 40787 | 38107 | 10832 | 40950 | 38025 | 193 | 1.44 |
| 90000 | .40 | .60 | 14400 | 43200 | 32400 | .3986 | .6014 | 14262 | 43044 | 32478 | 14184 | 43200 | 32400 | 216 | 1.17 |
| 90000 | .45 | .55 | 18225 | 44550 | 27225 | .4486 | .5514 | 18060 | 44407 | 27297 | 17989 | 44550 | 27225 | 236 | .94  |
| 90000 | .50 | .50 | 22500 | 45000 | 22500 | .4986 | .5014 | 22309 | 44872 | 22564 | 22245 | 45000 | 22500 | 255 | .73  |
| 90000 | .55 | .45 | 27225 | 44550 | 18225 | .5486 | .4514 | 27010 | 44440 | 18280 | 26955 | 44550 | 18225 | 270 | .55  |
| 90000 | .60 | .40 | 32400 | 43200 | 14400 | .5987 | .4013 | 32163 | 43109 | 14445 | 32118 | 43200 | 14400 | 282 | .40  |
| 90000 | .65 | .35 | 38025 | 40950 | 11025 | .6489 | .3511 | 37770 | 40879 | 11061 | 37735 | 40950 | 11025 | 290 | .27  |
| 90000 | .70 | .30 | 44100 | 37800 | 8100  | .6990 | .3010 | 43833 | 37747 | 8127  | 43806 | 37800 | 8100  | 294 | .18  |
| 90000 | .75 | .25 | 50625 | 33750 | 5625  | .7492 | .2508 | 50352 | 33713 | 5643  | 50333 | 33750 | 5625  | 292 | .11  |
| 90000 | .80 | .20 | 57600 | 28800 | 3600  | .7994 | .2006 | 57329 | 28777 | 3611  | 57318 | 28800 | 3600  | 282 | .06  |

|       |     |     |       |       |       |       |       |       |       |       |       |       |       |     |      |
|-------|-----|-----|-------|-------|-------|-------|-------|-------|-------|-------|-------|-------|-------|-----|------|
| 90000 | .85 | .15 | 65025 | 22950 | 2025  | .8496 | .1504 | 64768 | 22938 | 2031  | 64762 | 22950 | 2025  | 263 | .02  |
| 90000 | .90 | .10 | 72900 | 16200 | 900   | .8997 | .1003 | 72672 | 16195 | 902   | 72669 | 16200 | 900   | 231 | .01  |
| 90000 | .95 | .05 | 81225 | 8550  | 225   | .9499 | .0501 | 81051 | 8549  | 225   | 81051 | 8550  | 225   | 174 | .00  |
| 91000 | .05 | .95 | 228   | 8645  | 82128 | .0497 | .9503 | 225   | 8592  | 82154 | 198   | 8645  | 82128 | 30  | 3.50 |
| 91000 | .10 | .90 | 910   | 16380 | 73710 | .0994 | .9006 | 899   | 16285 | 73758 | 851   | 16380 | 73710 | 59  | 3.12 |
| 91000 | .15 | .85 | 2048  | 23205 | 65748 | .1492 | .8508 | 2023  | 23078 | 65811 | 1960  | 23205 | 65748 | 88  | 2.75 |
| 91000 | .20 | .80 | 3640  | 29120 | 58240 | .1990 | .8010 | 3598  | 28972 | 58314 | 3524  | 29120 | 58240 | 116 | 2.39 |
| 91000 | .25 | .75 | 5688  | 34125 | 51188 | .2488 | .7512 | 5625  | 33964 | 51268 | 5544  | 34125 | 51188 | 143 | 2.05 |
| 91000 | .30 | .70 | 8190  | 38220 | 44590 | .2987 | .7013 | 8104  | 38054 | 44673 | 8021  | 38220 | 44590 | 169 | 1.73 |
| 91000 | .35 | .65 | 11148 | 41405 | 38448 | .3486 | .6514 | 11036 | 41241 | 38530 | 10954 | 41405 | 38448 | 194 | 1.44 |
| 91000 | .40 | .60 | 14560 | 43680 | 32760 | .3986 | .6014 | 14421 | 43524 | 32838 | 14343 | 43680 | 32760 | 217 | 1.17 |
| 91000 | .45 | .55 | 18428 | 45045 | 27528 | .4486 | .5514 | 18262 | 44901 | 27600 | 18190 | 45045 | 27528 | 238 | .94  |
| 91000 | .50 | .50 | 22750 | 45500 | 22750 | .4986 | .5014 | 22558 | 45372 | 22814 | 22494 | 45500 | 22750 | 256 | .73  |
| 91000 | .55 | .45 | 27528 | 45045 | 18428 | .5487 | .4513 | 27311 | 44935 | 18483 | 27256 | 45045 | 18428 | 272 | .55  |
| 91000 | .60 | .40 | 32760 | 43680 | 14560 | .5987 | .4013 | 32522 | 43589 | 14606 | 32476 | 43680 | 14560 | 284 | .40  |
| 91000 | .65 | .35 | 38448 | 41405 | 11148 | .6489 | .3511 | 38191 | 41333 | 11183 | 38155 | 41405 | 11148 | 292 | .27  |
| 91000 | .70 | .30 | 44590 | 38220 | 8190  | .6990 | .3010 | 44321 | 38167 | 8217  | 44294 | 38220 | 8190  | 296 | .18  |
| 91000 | .75 | .25 | 51188 | 34125 | 5688  | .7492 | .2508 | 50913 | 34088 | 5706  | 50894 | 34125 | 5688  | 293 | .11  |
| 91000 | .80 | .20 | 58240 | 29120 | 3640  | .7994 | .2006 | 57968 | 29097 | 3651  | 57956 | 29120 | 3640  | 284 | .06  |
| 91000 | .85 | .15 | 65748 | 23205 | 2048  | .8496 | .1504 | 65489 | 23193 | 2053  | 65483 | 23205 | 2048  | 265 | .02  |
| 91000 | .90 | .10 | 73710 | 16380 | 910   | .8997 | .1003 | 73480 | 16375 | 912   | 73478 | 16380 | 910   | 232 | .01  |
| 91000 | .95 | .05 | 82128 | 8645  | 228   | .9499 | .0501 | 81953 | 8644  | 228   | 81952 | 8645  | 228   | 175 | .00  |
| 92000 | .05 | .95 | 230   | 8740  | 83030 | .0497 | .9503 | 227   | 8686  | 83057 | 200   | 8740  | 83030 | 30  | 3.50 |
| 92000 | .10 | .90 | 920   | 16560 | 74520 | .0994 | .9006 | 909   | 16464 | 74568 | 861   | 16560 | 74520 | 59  | 3.12 |
| 92000 | .15 | .85 | 2070  | 23460 | 66470 | .1492 | .8508 | 2046  | 23332 | 66534 | 1982  | 23460 | 66470 | 88  | 2.75 |
| 92000 | .20 | .80 | 3680  | 29440 | 58880 | .1990 | .8010 | 3638  | 29291 | 58955 | 3564  | 29440 | 58880 | 116 | 2.39 |
| 92000 | .25 | .75 | 5750  | 34500 | 51750 | .2488 | .7512 | 5687  | 34338 | 51831 | 5606  | 34500 | 51750 | 144 | 2.05 |
| 92000 | .30 | .70 | 8280  | 38640 | 45080 | .2987 | .7013 | 8193  | 38473 | 45164 | 8110  | 38640 | 45080 | 170 | 1.73 |
| 92000 | .35 | .65 | 11270 | 41860 | 38870 | .3486 | .6514 | 11158 | 41695 | 38953 | 11075 | 41860 | 38870 | 195 | 1.44 |
| 92000 | .40 | .60 | 14720 | 44160 | 33120 | .3986 | .6014 | 14581 | 44003 | 33199 | 14502 | 44160 | 33120 | 218 | 1.17 |
| 92000 | .45 | .55 | 18630 | 45540 | 27830 | .4486 | .5514 | 18464 | 45395 | 27902 | 18391 | 45540 | 27830 | 239 | .94  |
| 92000 | .50 | .50 | 23000 | 46000 | 23000 | .4986 | .5014 | 22807 | 45871 | 23065 | 22743 | 46000 | 23000 | 257 | .73  |
| 92000 | .55 | .45 | 27830 | 45540 | 18630 | .5487 | .4513 | 27612 | 45429 | 18685 | 27557 | 45540 | 18630 | 273 | .55  |

|       |     |     |       |       |       |       |       |       |       |       |       |       |       |     |      |
|-------|-----|-----|-------|-------|-------|-------|-------|-------|-------|-------|-------|-------|-------|-----|------|
| 92000 | .60 | .40 | 33120 | 44160 | 14720 | .5988 | .4012 | 32880 | 44068 | 14766 | 32835 | 44160 | 14720 | 285 | .40  |
| 92000 | .65 | .35 | 38870 | 41860 | 11270 | .6489 | .3511 | 38612 | 41788 | 11306 | 38576 | 41860 | 11270 | 294 | .27  |
| 92000 | .70 | .30 | 45080 | 38640 | 8280  | .6990 | .3010 | 44810 | 38586 | 8307  | 44783 | 38640 | 8280  | 297 | .18  |
| 92000 | .75 | .25 | 51750 | 34500 | 5750  | .7492 | .2508 | 51474 | 34463 | 5768  | 51455 | 34500 | 5750  | 295 | .11  |
| 92000 | .80 | .20 | 58880 | 29440 | 3680  | .7994 | .2006 | 58606 | 29417 | 3691  | 58595 | 29440 | 3680  | 285 | .06  |
| 92000 | .85 | .15 | 66470 | 23460 | 2070  | .8496 | .1504 | 66210 | 23448 | 2076  | 66204 | 23460 | 2070  | 266 | .02  |
| 92000 | .90 | .10 | 74520 | 16560 | 920   | .8997 | .1003 | 74289 | 16555 | 922   | 74287 | 16560 | 920   | 233 | .01  |
| 92000 | .95 | .05 | 83030 | 8740  | 230   | .9499 | .0501 | 82854 | 8739  | 230   | 82854 | 8740  | 230   | 176 | .00  |
| 93000 | .05 | .95 | 233   | 8835  | 83933 | .0497 | .9503 | 230   | 8781  | 83959 | 203   | 8835  | 83933 | 30  | 3.50 |
| 93000 | .10 | .90 | 930   | 16740 | 75330 | .0994 | .9006 | 919   | 16644 | 75378 | 871   | 16740 | 75330 | 59  | 3.12 |
| 93000 | .15 | .85 | 2093  | 23715 | 67193 | .1492 | .8508 | 2068  | 23587 | 67257 | 2004  | 23715 | 67193 | 89  | 2.75 |
| 93000 | .20 | .80 | 3720  | 29760 | 59520 | .1990 | .8010 | 3678  | 29610 | 59595 | 3603  | 29760 | 59520 | 117 | 2.39 |
| 93000 | .25 | .75 | 5813  | 34875 | 52313 | .2488 | .7512 | 5749  | 34712 | 52394 | 5668  | 34875 | 52313 | 145 | 2.05 |
| 93000 | .30 | .70 | 8370  | 39060 | 45570 | .2987 | .7013 | 8283  | 38892 | 45654 | 8199  | 39060 | 45570 | 171 | 1.73 |
| 93000 | .35 | .65 | 11393 | 42315 | 39293 | .3486 | .6514 | 11280 | 42149 | 39375 | 11197 | 42315 | 39293 | 196 | 1.44 |
| 93000 | .40 | .60 | 14880 | 44640 | 33480 | .3986 | .6014 | 14740 | 44482 | 33559 | 14661 | 44640 | 33480 | 219 | 1.17 |
| 93000 | .45 | .55 | 18833 | 46035 | 28133 | .4486 | .5514 | 18665 | 45889 | 28205 | 18592 | 46035 | 28133 | 240 | .94  |
| 93000 | .50 | .50 | 23250 | 46500 | 23250 | .4986 | .5014 | 23056 | 46370 | 23315 | 22991 | 46500 | 23250 | 259 | .73  |
| 93000 | .55 | .45 | 28133 | 46035 | 18833 | .5487 | .4513 | 27914 | 45923 | 18888 | 27858 | 46035 | 18833 | 275 | .55  |
| 93000 | .60 | .40 | 33480 | 44640 | 14880 | .5988 | .4012 | 33239 | 44548 | 14926 | 33193 | 44640 | 14880 | 287 | .40  |
| 93000 | .65 | .35 | 39293 | 42315 | 11393 | .6489 | .3511 | 39034 | 42242 | 11429 | 38997 | 42315 | 11393 | 295 | .27  |
| 93000 | .70 | .30 | 45570 | 39060 | 8370  | .6990 | .3010 | 45298 | 39006 | 8397  | 45271 | 39060 | 8370  | 299 | .18  |
| 93000 | .75 | .25 | 52313 | 34875 | 5813  | .7492 | .2508 | 52035 | 34838 | 5831  | 52016 | 34875 | 5813  | 297 | .11  |
| 93000 | .80 | .20 | 59520 | 29760 | 3720  | .7994 | .2006 | 59245 | 29737 | 3732  | 59233 | 29760 | 3720  | 287 | .06  |
| 93000 | .85 | .15 | 67193 | 23715 | 2093  | .8496 | .1504 | 66931 | 23703 | 2099  | 66925 | 23715 | 2093  | 268 | .02  |
| 93000 | .90 | .10 | 75330 | 16740 | 930   | .8997 | .1003 | 75098 | 16735 | 932   | 75096 | 16740 | 930   | 234 | .01  |
| 93000 | .95 | .05 | 83933 | 8835  | 233   | .9499 | .0501 | 83756 | 8834  | 233   | 83755 | 8835  | 233   | 177 | .00  |
| 94000 | .05 | .95 | 235   | 8930  | 84835 | .0497 | .9503 | 232   | 8876  | 84862 | 205   | 8930  | 84835 | 30  | 3.50 |
| 94000 | .10 | .90 | 940   | 16920 | 76140 | .0994 | .9006 | 929   | 16823 | 76188 | 880   | 16920 | 76140 | 60  | 3.12 |
| 94000 | .15 | .85 | 2115  | 23970 | 67915 | .1492 | .8508 | 2090  | 23841 | 67979 | 2026  | 23970 | 67915 | 89  | 2.75 |
| 94000 | .20 | .80 | 3760  | 30080 | 60160 | .1990 | .8010 | 3718  | 29929 | 60235 | 3642  | 30080 | 60160 | 118 | 2.39 |
| 94000 | .25 | .75 | 5875  | 35250 | 52875 | .2488 | .7512 | 5811  | 35086 | 52957 | 5730  | 35250 | 52875 | 145 | 2.05 |
| 94000 | .30 | .70 | 8460  | 39480 | 46060 | .2987 | .7013 | 8372  | 39311 | 46144 | 8288  | 39480 | 46060 | 172 | 1.73 |

|       |     |     |       |       |       |       |       |       |       |       |       |       |       |     |      |
|-------|-----|-----|-------|-------|-------|-------|-------|-------|-------|-------|-------|-------|-------|-----|------|
| 94000 | .35 | .65 | 11515 | 42770 | 39715 | .3486 | .6514 | 11401 | 42603 | 39798 | 11318 | 42770 | 39715 | 197 | 1.44 |
| 94000 | .40 | .60 | 15040 | 45120 | 33840 | .3986 | .6014 | 14899 | 44961 | 33919 | 14820 | 45120 | 33840 | 220 | 1.17 |
| 94000 | .45 | .55 | 19035 | 46530 | 28435 | .4486 | .5514 | 18867 | 46384 | 28508 | 18794 | 46530 | 28435 | 241 | .94  |
| 94000 | .50 | .50 | 23500 | 47000 | 23500 | .4986 | .5014 | 23305 | 46870 | 23565 | 23240 | 47000 | 23500 | 260 | .73  |
| 94000 | .55 | .45 | 28435 | 46530 | 19035 | .5487 | .4513 | 28215 | 46418 | 19091 | 28159 | 46530 | 19035 | 276 | .55  |
| 94000 | .60 | .40 | 33840 | 45120 | 15040 | .5988 | .4012 | 33598 | 45027 | 15086 | 33552 | 45120 | 15040 | 288 | .40  |
| 94000 | .65 | .35 | 39715 | 42770 | 11515 | .6489 | .3511 | 39455 | 42697 | 11551 | 39418 | 42770 | 11515 | 297 | .27  |
| 94000 | .70 | .30 | 46060 | 39480 | 8460  | .6990 | .3010 | 45787 | 39426 | 8487  | 45760 | 39480 | 8460  | 300 | .18  |
| 94000 | .75 | .25 | 52875 | 35250 | 5875  | .7492 | .2508 | 52596 | 35213 | 5894  | 52577 | 35250 | 5875  | 298 | .11  |
| 94000 | .80 | .20 | 60160 | 30080 | 3760  | .7994 | .2006 | 59883 | 30057 | 3772  | 59872 | 30080 | 3760  | 288 | .06  |
| 94000 | .85 | .15 | 67915 | 23970 | 2115  | .8496 | .1504 | 67652 | 23958 | 2121  | 67646 | 23970 | 2115  | 269 | .02  |
| 94000 | .90 | .10 | 76140 | 16920 | 940   | .8997 | .1003 | 75907 | 16915 | 942   | 75904 | 16920 | 940   | 236 | .01  |
| 94000 | .95 | .05 | 84835 | 8930  | 235   | .9499 | .0501 | 84657 | 8929  | 235   | 84657 | 8930  | 235   | 178 | .00  |
| 95000 | .05 | .95 | 238   | 9025  | 85738 | .0497 | .9503 | 235   | 8971  | 85765 | 207   | 9025  | 85738 | 30  | 3.50 |
| 95000 | .10 | .90 | 950   | 17100 | 76950 | .0994 | .9006 | 939   | 17003 | 76999 | 890   | 17100 | 76950 | 60  | 3.12 |
| 95000 | .15 | .85 | 2138  | 24225 | 68638 | .1492 | .8508 | 2113  | 24095 | 68702 | 2048  | 24225 | 68638 | 90  | 2.74 |
| 95000 | .20 | .80 | 3800  | 30400 | 60800 | .1990 | .8010 | 3757  | 30248 | 60876 | 3682  | 30400 | 60800 | 118 | 2.39 |
| 95000 | .25 | .75 | 5938  | 35625 | 53438 | .2488 | .7512 | 5874  | 35460 | 53520 | 5791  | 35625 | 53438 | 146 | 2.05 |
| 95000 | .30 | .70 | 8550  | 39900 | 46550 | .2987 | .7013 | 8462  | 39730 | 46635 | 8377  | 39900 | 46550 | 173 | 1.73 |
| 95000 | .35 | .65 | 11638 | 43225 | 40138 | .3486 | .6514 | 11523 | 43057 | 40221 | 11439 | 43225 | 40138 | 198 | 1.44 |
| 95000 | .40 | .60 | 15200 | 45600 | 34200 | .3986 | .6014 | 15058 | 45440 | 34280 | 14979 | 45600 | 34200 | 221 | 1.17 |
| 95000 | .45 | .55 | 19238 | 47025 | 28738 | .4486 | .5514 | 19068 | 46878 | 28811 | 18995 | 47025 | 28738 | 243 | .93  |
| 95000 | .50 | .50 | 23750 | 47500 | 23750 | .4986 | .5014 | 23554 | 47369 | 23816 | 23488 | 47500 | 23750 | 262 | .73  |
| 95000 | .55 | .45 | 28738 | 47025 | 19238 | .5487 | .4513 | 28516 | 46912 | 19294 | 28460 | 47025 | 19238 | 277 | .55  |
| 95000 | .60 | .40 | 34200 | 45600 | 15200 | .5988 | .4012 | 33957 | 45507 | 15247 | 33910 | 45600 | 15200 | 290 | .40  |
| 95000 | .65 | .35 | 40138 | 43225 | 11638 | .6489 | .3511 | 39876 | 43152 | 11674 | 39839 | 43225 | 11638 | 298 | .27  |
| 95000 | .70 | .30 | 46550 | 39900 | 8550  | .6990 | .3010 | 46275 | 39845 | 8577  | 46248 | 39900 | 8550  | 302 | .18  |
| 95000 | .75 | .25 | 53438 | 35625 | 5938  | .7492 | .2508 | 53157 | 35587 | 5956  | 53138 | 35625 | 5938  | 300 | .11  |
| 95000 | .80 | .20 | 60800 | 30400 | 3800  | .7994 | .2006 | 60522 | 30377 | 3812  | 60510 | 30400 | 3800  | 290 | .06  |
| 95000 | .85 | .15 | 68638 | 24225 | 2138  | .8496 | .1504 | 68373 | 24213 | 2144  | 68367 | 24225 | 2138  | 271 | .02  |
| 95000 | .90 | .10 | 76950 | 17100 | 950   | .8997 | .1003 | 76715 | 17095 | 952   | 76713 | 17100 | 950   | 237 | .01  |
| 95000 | .95 | .05 | 85738 | 9025  | 238   | .9499 | .0501 | 85559 | 9024  | 238   | 85558 | 9025  | 238   | 179 | .00  |
| 96000 | .05 | .95 | 240   | 9120  | 86640 | .0497 | .9503 | 237   | 9065  | 86667 | 210   | 9120  | 86640 | 30  | 3.50 |

|       |     |     |       |       |       |       |       |       |       |       |       |       |       |     |      |
|-------|-----|-----|-------|-------|-------|-------|-------|-------|-------|-------|-------|-------|-------|-----|------|
| 96000 | .10 | .90 | 960   | 17280 | 77760 | .0994 | .9006 | 949   | 17182 | 77809 | 900   | 17280 | 77760 | 60  | 3.12 |
| 96000 | .15 | .85 | 2160  | 24480 | 69360 | .1492 | .8508 | 2135  | 24350 | 69425 | 2070  | 24480 | 69360 | 90  | 2.74 |
| 96000 | .20 | .80 | 3840  | 30720 | 61440 | .1990 | .8010 | 3797  | 30567 | 61516 | 3721  | 30720 | 61440 | 119 | 2.39 |
| 96000 | .25 | .75 | 6000  | 36000 | 54000 | .2488 | .7512 | 5936  | 35834 | 54083 | 5853  | 36000 | 54000 | 147 | 2.05 |
| 96000 | .30 | .70 | 8640  | 40320 | 47040 | .2987 | .7013 | 8552  | 40149 | 47125 | 8466  | 40320 | 47040 | 174 | 1.73 |
| 96000 | .35 | .65 | 11760 | 43680 | 40560 | .3486 | .6514 | 11645 | 43511 | 40644 | 11561 | 43680 | 40560 | 199 | 1.44 |
| 96000 | .40 | .60 | 15360 | 46080 | 34560 | .3986 | .6014 | 15218 | 45919 | 34640 | 15137 | 46080 | 34560 | 223 | 1.17 |
| 96000 | .45 | .55 | 19440 | 47520 | 29040 | .4486 | .5514 | 19270 | 47372 | 29114 | 19196 | 47520 | 29040 | 244 | .93  |
| 96000 | .50 | .50 | 24000 | 48000 | 24000 | .4986 | .5014 | 23803 | 47868 | 24066 | 23737 | 48000 | 24000 | 263 | .73  |
| 96000 | .55 | .45 | 29040 | 47520 | 19440 | .5487 | .4513 | 28818 | 47407 | 19497 | 28761 | 47520 | 19440 | 279 | .55  |
| 96000 | .60 | .40 | 34560 | 46080 | 15360 | .5988 | .4012 | 34315 | 45986 | 15407 | 34269 | 46080 | 15360 | 291 | .40  |
| 96000 | .65 | .35 | 40560 | 43680 | 11760 | .6489 | .3511 | 40297 | 43606 | 11797 | 40260 | 43680 | 11760 | 300 | .27  |
| 96000 | .70 | .30 | 47040 | 40320 | 8640  | .6990 | .3010 | 46764 | 40265 | 8667  | 46736 | 40320 | 8640  | 304 | .18  |
| 96000 | .75 | .25 | 54000 | 36000 | 6000  | .7492 | .2508 | 53718 | 35962 | 6019  | 53699 | 36000 | 6000  | 301 | .11  |
| 96000 | .80 | .20 | 61440 | 30720 | 3840  | .7994 | .2006 | 61160 | 30697 | 3852  | 61149 | 30720 | 3840  | 291 | .06  |
| 96000 | .85 | .15 | 69360 | 24480 | 2160  | .8496 | .1504 | 69094 | 24468 | 2166  | 69088 | 24480 | 2160  | 272 | .02  |
| 96000 | .90 | .10 | 77760 | 17280 | 960   | .8998 | .1002 | 77524 | 17275 | 962   | 77522 | 17280 | 960   | 238 | .01  |
| 96000 | .95 | .05 | 86640 | 9120  | 240   | .9499 | .0501 | 86460 | 9119  | 240   | 86460 | 9120  | 240   | 180 | .00  |
| 97000 | .05 | .95 | 243   | 9215  | 87543 | .0497 | .9503 | 240   | 9160  | 87570 | 212   | 9215  | 87543 | 30  | 3.50 |
| 97000 | .10 | .90 | 970   | 17460 | 78570 | .0994 | .9006 | 958   | 17362 | 78619 | 909   | 17460 | 78570 | 61  | 3.12 |
| 97000 | .15 | .85 | 2183  | 24735 | 70083 | .1492 | .8508 | 2157  | 24604 | 70148 | 2092  | 24735 | 70083 | 91  | 2.74 |
| 97000 | .20 | .80 | 3880  | 31040 | 62080 | .1990 | .8010 | 3837  | 30887 | 62157 | 3760  | 31040 | 62080 | 120 | 2.39 |
| 97000 | .25 | .75 | 6063  | 36375 | 54563 | .2489 | .7511 | 5998  | 36209 | 54646 | 5915  | 36375 | 54563 | 148 | 2.05 |
| 97000 | .30 | .70 | 8730  | 40740 | 47530 | .2987 | .7013 | 8641  | 40568 | 47616 | 8555  | 40740 | 47530 | 175 | 1.73 |
| 97000 | .35 | .65 | 11883 | 44135 | 40983 | .3487 | .6513 | 11767 | 43966 | 41067 | 11682 | 44135 | 40983 | 200 | 1.44 |
| 97000 | .40 | .60 | 15520 | 46560 | 34920 | .3986 | .6014 | 15377 | 46398 | 35001 | 15296 | 46560 | 34920 | 224 | 1.17 |
| 97000 | .45 | .55 | 19643 | 48015 | 29343 | .4486 | .5514 | 19472 | 47866 | 29417 | 19397 | 48015 | 29343 | 245 | .93  |
| 97000 | .50 | .50 | 24250 | 48500 | 24250 | .4986 | .5014 | 24052 | 48367 | 24316 | 23986 | 48500 | 24250 | 264 | .73  |
| 97000 | .55 | .45 | 29343 | 48015 | 19643 | .5487 | .4513 | 29119 | 47901 | 19699 | 29062 | 48015 | 19643 | 280 | .55  |
| 97000 | .60 | .40 | 34920 | 46560 | 15520 | .5988 | .4012 | 34674 | 46466 | 15567 | 34627 | 46560 | 15520 | 293 | .40  |
| 97000 | .65 | .35 | 40983 | 44135 | 11883 | .6489 | .3511 | 40718 | 44061 | 11920 | 40681 | 44135 | 11883 | 302 | .27  |
| 97000 | .70 | .30 | 47530 | 40740 | 8730  | .6991 | .3009 | 47252 | 40685 | 8758  | 47225 | 40740 | 8730  | 305 | .18  |
| 97000 | .75 | .25 | 54563 | 36375 | 6063  | .7492 | .2508 | 54279 | 36337 | 6081  | 54260 | 36375 | 6063  | 303 | .11  |



|       |     |     |       |       |       |       |       |       |       |       |       |       |       |     |      |
|-------|-----|-----|-------|-------|-------|-------|-------|-------|-------|-------|-------|-------|-------|-----|------|
| 97000 | .80 | .20 | 62080 | 31040 | 3880  | .7994 | .2006 | 61799 | 31016 | 3892  | 61787 | 31040 | 3880  | 293 | .06  |
| 97000 | .85 | .15 | 70083 | 24735 | 2183  | .8496 | .1504 | 69815 | 24723 | 2189  | 69809 | 24735 | 2183  | 273 | .02  |
| 97000 | .90 | .10 | 78570 | 17460 | 970   | .8998 | .1002 | 78333 | 17455 | 972   | 78331 | 17460 | 970   | 239 | .01  |
| 97000 | .95 | .05 | 87543 | 9215  | 243   | .9499 | .0501 | 87362 | 9214  | 243   | 87361 | 9215  | 243   | 181 | .00  |
| 98000 | .05 | .95 | 245   | 9310  | 88445 | .0497 | .9503 | 242   | 9255  | 88473 | 214   | 9310  | 88445 | 31  | 3.50 |
| 98000 | .10 | .90 | 980   | 17640 | 79380 | .0994 | .9006 | 968   | 17541 | 79429 | 919   | 17640 | 79380 | 61  | 3.12 |
| 98000 | .15 | .85 | 2205  | 24990 | 70805 | .1492 | .8508 | 2180  | 24858 | 70871 | 2114  | 24990 | 70805 | 91  | 2.74 |
| 98000 | .20 | .80 | 3920  | 31360 | 62720 | .1990 | .8010 | 3877  | 31206 | 62797 | 3800  | 31360 | 62720 | 120 | 2.39 |
| 98000 | .25 | .75 | 6125  | 36750 | 55125 | .2489 | .7511 | 6060  | 36583 | 55209 | 5976  | 36750 | 55125 | 149 | 2.05 |
| 98000 | .30 | .70 | 8820  | 41160 | 48020 | .2987 | .7013 | 8731  | 40988 | 48106 | 8644  | 41160 | 48020 | 176 | 1.73 |
| 98000 | .35 | .65 | 12005 | 44590 | 41405 | .3487 | .6513 | 11889 | 44420 | 41490 | 11804 | 44590 | 41405 | 201 | 1.44 |
| 98000 | .40 | .60 | 15680 | 47040 | 35280 | .3986 | .6014 | 15536 | 46878 | 35361 | 15455 | 47040 | 35280 | 225 | 1.17 |
| 98000 | .45 | .55 | 19845 | 48510 | 29645 | .4486 | .5514 | 19673 | 48360 | 29720 | 19598 | 48510 | 29645 | 247 | .93  |
| 98000 | .50 | .50 | 24500 | 49000 | 24500 | .4986 | .5014 | 24301 | 48867 | 24567 | 24234 | 49000 | 24500 | 266 | .73  |
| 98000 | .55 | .45 | 29645 | 48510 | 19845 | .5487 | .4513 | 29420 | 48396 | 19902 | 29363 | 48510 | 19845 | 282 | .55  |
| 98000 | .60 | .40 | 35280 | 47040 | 15680 | .5988 | .4012 | 35033 | 46945 | 15727 | 34985 | 47040 | 15680 | 295 | .40  |
| 98000 | .65 | .35 | 41405 | 44590 | 12005 | .6489 | .3511 | 41139 | 44516 | 12042 | 41102 | 44590 | 12005 | 303 | .27  |
| 98000 | .70 | .30 | 48020 | 41160 | 8820  | .6991 | .3009 | 47741 | 41105 | 8848  | 47713 | 41160 | 8820  | 307 | .18  |
| 98000 | .75 | .25 | 55125 | 36750 | 6125  | .7492 | .2508 | 54840 | 36712 | 6144  | 54821 | 36750 | 6125  | 304 | .11  |
| 98000 | .80 | .20 | 62720 | 31360 | 3920  | .7994 | .2006 | 62437 | 31336 | 3932  | 62425 | 31360 | 3920  | 295 | .06  |
| 98000 | .85 | .15 | 70805 | 24990 | 2205  | .8496 | .1504 | 70536 | 24978 | 2211  | 70530 | 24990 | 2205  | 275 | .02  |
| 98000 | .90 | .10 | 79380 | 17640 | 980   | .8998 | .1002 | 79142 | 17635 | 982   | 79139 | 17640 | 980   | 241 | .01  |
| 98000 | .95 | .05 | 88445 | 9310  | 245   | .9499 | .0501 | 88263 | 9309  | 245   | 88263 | 9310  | 245   | 182 | .00  |
| 99000 | .05 | .95 | 248   | 9405  | 89348 | .0497 | .9503 | 245   | 9349  | 89375 | 217   | 9405  | 89348 | 31  | 3.50 |
| 99000 | .10 | .90 | 990   | 17820 | 80190 | .0994 | .9006 | 978   | 17721 | 80240 | 929   | 17820 | 80190 | 61  | 3.12 |
| 99000 | .15 | .85 | 2228  | 25245 | 71528 | .1492 | .8508 | 2202  | 25113 | 71594 | 2136  | 25245 | 71528 | 91  | 2.74 |
| 99000 | .20 | .80 | 3960  | 31680 | 63360 | .1990 | .8010 | 3917  | 31525 | 63437 | 3839  | 31680 | 63360 | 121 | 2.39 |
| 99000 | .25 | .75 | 6188  | 37125 | 55688 | .2489 | .7511 | 6122  | 36957 | 55772 | 6038  | 37125 | 55688 | 149 | 2.05 |
| 99000 | .30 | .70 | 8910  | 41580 | 48510 | .2987 | .7013 | 8820  | 41407 | 48597 | 8734  | 41580 | 48510 | 176 | 1.73 |
| 99000 | .35 | .65 | 12128 | 45045 | 41828 | .3487 | .6513 | 12011 | 44874 | 41913 | 11925 | 45045 | 41828 | 202 | 1.44 |
| 99000 | .40 | .60 | 15840 | 47520 | 35640 | .3986 | .6014 | 15695 | 47357 | 35722 | 15614 | 47520 | 35640 | 226 | 1.17 |
| 99000 | .45 | .55 | 20048 | 49005 | 29948 | .4486 | .5514 | 19875 | 48855 | 30023 | 19800 | 49005 | 29948 | 248 | .93  |
| 99000 | .50 | .50 | 24750 | 49500 | 24750 | .4986 | .5014 | 24550 | 49366 | 24817 | 24483 | 49500 | 24750 | 267 | .73  |

|        |     |     |       |       |       |       |       |       |       |       |       |       |       |     |      |
|--------|-----|-----|-------|-------|-------|-------|-------|-------|-------|-------|-------|-------|-------|-----|------|
| 99000  | .55 | .45 | 29948 | 49005 | 20048 | .5487 | .4513 | 29722 | 48890 | 20105 | 29664 | 49005 | 20048 | 283 | .55  |
| 99000  | .60 | .40 | 35640 | 47520 | 15840 | .5988 | .4012 | 35391 | 47425 | 15888 | 35344 | 47520 | 15840 | 296 | .40  |
| 99000  | .65 | .35 | 41828 | 45045 | 12128 | .6489 | .3511 | 41560 | 44970 | 12165 | 41523 | 45045 | 12128 | 305 | .27  |
| 99000  | .70 | .30 | 48510 | 41580 | 8910  | .6991 | .3009 | 48230 | 41524 | 8938  | 48202 | 41580 | 8910  | 308 | .18  |
| 99000  | .75 | .25 | 55688 | 37125 | 6188  | .7492 | .2508 | 55401 | 37087 | 6207  | 55382 | 37125 | 6188  | 306 | .11  |
| 99000  | .80 | .20 | 63360 | 31680 | 3960  | .7994 | .2006 | 63076 | 31656 | 3972  | 63064 | 31680 | 3960  | 296 | .06  |
| 99000  | .85 | .15 | 71528 | 25245 | 2228  | .8496 | .1504 | 71258 | 25233 | 2234  | 71251 | 25245 | 2228  | 276 | .02  |
| 99000  | .90 | .10 | 80190 | 17820 | 990   | .8998 | .1002 | 79950 | 17815 | 992   | 79948 | 17820 | 990   | 242 | .01  |
| 99000  | .95 | .05 | 89348 | 9405  | 248   | .9499 | .0501 | 89165 | 9404  | 248   | 89165 | 9405  | 248   | 183 | .00  |
| 100000 | .05 | .95 | 250   | 9500  | 90250 | .0497 | .9503 | 247   | 9444  | 90278 | 219   | 9500  | 90250 | 31  | 3.50 |
| 100000 | .10 | .90 | 1000  | 18000 | 81000 | .0994 | .9006 | 988   | 17900 | 81050 | 938   | 18000 | 81000 | 62  | 3.12 |
| 100000 | .15 | .85 | 2250  | 25500 | 72250 | .1492 | .8508 | 2225  | 25367 | 72316 | 2158  | 25500 | 72250 | 92  | 2.74 |
| 100000 | .20 | .80 | 4000  | 32000 | 64000 | .1990 | .8010 | 3956  | 31844 | 64078 | 3879  | 32000 | 64000 | 121 | 2.39 |
| 100000 | .25 | .75 | 6250  | 37500 | 56250 | .2489 | .7511 | 6184  | 37331 | 56335 | 6100  | 37500 | 56250 | 150 | 2.05 |
| 100000 | .30 | .70 | 9000  | 42000 | 49000 | .2988 | .7012 | 8910  | 41826 | 49087 | 8823  | 42000 | 49000 | 177 | 1.73 |
| 100000 | .35 | .65 | 12250 | 45500 | 42250 | .3487 | .6513 | 12133 | 45328 | 42336 | 12047 | 45500 | 42250 | 203 | 1.44 |
| 100000 | .40 | .60 | 16000 | 48000 | 36000 | .3986 | .6014 | 15855 | 47836 | 36082 | 15773 | 48000 | 36000 | 227 | 1.17 |
| 100000 | .45 | .55 | 20250 | 49500 | 30250 | .4486 | .5514 | 20076 | 49349 | 30326 | 20001 | 49500 | 30250 | 249 | .93  |
| 100000 | .50 | .50 | 25000 | 50000 | 25000 | .4987 | .5013 | 24799 | 49865 | 25067 | 24732 | 50000 | 25000 | 268 | .73  |
| 100000 | .55 | .45 | 30250 | 49500 | 20250 | .5487 | .4513 | 30023 | 49384 | 20308 | 29965 | 49500 | 20250 | 285 | .55  |
| 100000 | .60 | .40 | 36000 | 48000 | 16000 | .5988 | .4012 | 35750 | 47905 | 16048 | 35702 | 48000 | 16000 | 298 | .40  |
| 100000 | .65 | .35 | 42250 | 45500 | 12250 | .6489 | .3511 | 41981 | 45425 | 12288 | 41944 | 45500 | 12250 | 306 | .27  |
| 100000 | .70 | .30 | 49000 | 42000 | 9000  | .6991 | .3009 | 48718 | 41944 | 9028  | 48690 | 42000 | 9000  | 310 | .18  |
| 100000 | .75 | .25 | 56250 | 37500 | 6250  | .7492 | .2508 | 55962 | 37461 | 6269  | 55943 | 37500 | 6250  | 307 | .11  |
| 100000 | .80 | .20 | 64000 | 32000 | 4000  | .7994 | .2006 | 63714 | 31976 | 4012  | 63702 | 32000 | 4000  | 298 | .06  |
| 100000 | .85 | .15 | 72250 | 25500 | 2250  | .8496 | .1504 | 71979 | 25487 | 2256  | 71972 | 25500 | 2250  | 278 | .02  |
| 100000 | .90 | .10 | 81000 | 18000 | 1000  | .8998 | .1002 | 80759 | 17995 | 1002  | 80757 | 18000 | 1000  | 243 | .01  |
| 100000 | .95 | .05 | 90250 | 9500  | 250   | .9499 | .0501 | 90067 | 9499  | 250   | 90066 | 9500  | 250   | 184 | .00  |
