# Supplementary material for: Hardy-Weinberg Equilibrium Testing of Biological Ascertainment for Mendelian Randomization Studies
Source: PubMed Central journal article supplement — Am J Epidemiol. 2009 Jan 6;169(4):505–14. doi: 10.1093/aje/kwn359 (PMC2640163; doi:10.1093/aje/kwn359), 2009-01-06
Supplement: kwn359_6.pdf [file kwn359_6.pdf]

Web Table 4. Summary of deviations from Hardy Weinberg Equilibrium for sample sizes from 1000 to 100000, and for allele frequencies from 0.05 to 0.95 (with increments of 0.05) after subtracting from the heterozygote group a number of 1.96 standard deviations.  $p_{true}$  and  $q_{true}$  are the allele frequencies used to start the simulations. They were also used to estimate the true frequencies of homozygotes (Hz1 True and Hz2 True) and heterozygotes (Het True) assuming HWE.  $p_{false}$  and  $q_{false}$  are the allele frequencies observed after subtracting from the heterozygote 1 group a number of 1.96 standard deviations. Hz1 Exp, Het Exp and Hz2 Exp are the expected values of the three genotype groups computed from  $p_{false}$  and  $q_{false}$ . Hz1 Obs, Het Obs and Hz2 Obs are the observed values for each genotype group after subtracting from the heterozygote 1 group a number of 1.96 standard deviations (which equates to the number presented in No call).  $\chi^2$  is the HWE  $\chi^2$  value.

| N    | $p_{true}$ | $q_{true}$ | Hz1 True | Het True | Hz2 True | $p_{false}$ | $q_{false}$ | Hz1 Exp | Het Exp | Hz2 Exp | Hz1 Obs | Het Obs | Hz2 Obs | No call | $\chi^2$ |
|------|------------|------------|----------|----------|----------|-------------|-------------|---------|---------|---------|---------|---------|---------|---------|----------|
| 1000 | .05        | .95        | 3        | 95       | 903      | .0417       | .9583       | 2       | 78      | 902     | 3       | 77      | 903     | 18      | .40      |
| 1000 | .10        | .90        | 10       | 180      | 810      | .0902       | .9098       | 8       | 160     | 808     | 10      | 156     | 810     | 24      | .64      |
| 1000 | .15        | .85        | 23       | 255      | 723      | .1403       | .8597       | 19      | 235     | 719     | 23      | 228     | 723     | 27      | .79      |
| 1000 | .20        | .80        | 40       | 320      | 640      | .1911       | .8089       | 35      | 300     | 635     | 40      | 291     | 640     | 29      | .89      |
| 1000 | .25        | .75        | 63       | 375      | 563      | .2423       | .7577       | 57      | 356     | 557     | 63      | 345     | 563     | 30      | .95      |
| 1000 | .30        | .70        | 90       | 420      | 490      | .2937       | .7063       | 84      | 402     | 484     | 90      | 389     | 490     | 31      | .98      |
| 1000 | .35        | .65        | 123      | 455      | 423      | .3452       | .6548       | 116     | 438     | 416     | 123     | 424     | 423     | 31      | .99      |
| 1000 | .40        | .60        | 160      | 480      | 360      | .3968       | .6032       | 153     | 464     | 353     | 160     | 449     | 360     | 31      | .99      |
| 1000 | .45        | .55        | 203      | 495      | 303      | .4484       | .5516       | 195     | 479     | 295     | 203     | 464     | 303     | 31      | .99      |
| 1000 | .50        | .50        | 250      | 500      | 250      | .5000       | .5000       | 242     | 485     | 242     | 250     | 469     | 250     | 31      | .99      |
| 1000 | .55        | .45        | 303      | 495      | 203      | .5516       | .4484       | 295     | 479     | 195     | 303     | 464     | 203     | 31      | .99      |
| 1000 | .60        | .40        | 360      | 480      | 160      | .6032       | .3968       | 353     | 464     | 153     | 360     | 449     | 160     | 31      | .99      |
| 1000 | .65        | .35        | 423      | 455      | 123      | .6548       | .3452       | 416     | 438     | 116     | 423     | 424     | 123     | 31      | .99      |
| 1000 | .70        | .30        | 490      | 420      | 90       | .7063       | .2937       | 484     | 402     | 84      | 490     | 389     | 90      | 31      | .98      |
| 1000 | .75        | .25        | 563      | 375      | 63       | .7577       | .2423       | 557     | 356     | 57      | 563     | 345     | 63      | 30      | .95      |
| 1000 | .80        | .20        | 640      | 320      | 40       | .8089       | .1911       | 635     | 300     | 35      | 640     | 291     | 40      | 29      | .89      |
| 1000 | .85        | .15        | 723      | 255      | 23       | .8597       | .1403       | 719     | 235     | 19      | 723     | 228     | 23      | 27      | .79      |
| 1000 | .90        | .10        | 810      | 180      | 10       | .9098       | .0902       | 808     | 160     | 8       | 810     | 156     | 10      | 24      | .64      |
| 1000 | .95        | .05        | 903      | 95       | 3        | .9583       | .0417       | 902     | 78      | 2       | 903     | 77      | 3       | 18      | .40      |
| 2000 | .05        | .95        | 5        | 190      | 1805     | .0441       | .9559       | 4       | 167     | 1804    | 5       | 164     | 1805    | 26      | .38      |
| 2000 | .10        | .90        | 20       | 360      | 1620     | .0931       | .9069       | 17      | 332     | 1617    | 20      | 326     | 1620    | 34      | .62      |
| 2000 | .15        | .85        | 45       | 510      | 1445     | .1432       | .8568       | 40      | 481     | 1440    | 45      | 472     | 1445    | 38      | .77      |
| 2000 | .20        | .80        | 80       | 640      | 1280     | .1937       | .8063       | 74      | 612     | 1274    | 80      | 599     | 1280    | 41      | .87      |
| 2000 | .25        | .75        | 125      | 750      | 1125     | .2446       | .7554       | 117     | 723     | 1117    | 125     | 708     | 1125    | 42      | .93      |

|      |     |     |      |      |      |       |       |      |      |      |      |      |      |    |     |
|------|-----|-----|------|------|------|-------|-------|------|------|------|------|------|------|----|-----|
| 2000 | .30 | .70 | 180  | 840  | 980  | .2956 | .7044 | 171  | 815  | 971  | 180  | 797  | 980  | 43 | .96 |
| 2000 | .35 | .65 | 245  | 910  | 845  | .3467 | .6533 | 235  | 886  | 835  | 245  | 866  | 845  | 44 | .98 |
| 2000 | .40 | .60 | 320  | 960  | 720  | .3978 | .6022 | 309  | 937  | 709  | 320  | 916  | 720  | 44 | .98 |
| 2000 | .45 | .55 | 405  | 990  | 605  | .4489 | .5511 | 394  | 968  | 594  | 405  | 946  | 605  | 44 | .98 |
| 2000 | .50 | .50 | 500  | 1000 | 500  | .5000 | .5000 | 489  | 978  | 489  | 500  | 956  | 500  | 44 | .98 |
| 2000 | .55 | .45 | 605  | 990  | 405  | .5511 | .4489 | 594  | 968  | 394  | 605  | 946  | 405  | 44 | .98 |
| 2000 | .60 | .40 | 720  | 960  | 320  | .6022 | .3978 | 709  | 937  | 309  | 720  | 916  | 320  | 44 | .98 |
| 2000 | .65 | .35 | 845  | 910  | 245  | .6533 | .3467 | 835  | 886  | 235  | 845  | 866  | 245  | 44 | .98 |
| 2000 | .70 | .30 | 980  | 840  | 180  | .7044 | .2956 | 971  | 815  | 171  | 980  | 797  | 180  | 43 | .96 |
| 2000 | .75 | .25 | 1125 | 750  | 125  | .7554 | .2446 | 1117 | 723  | 117  | 1125 | 708  | 125  | 42 | .93 |
| 2000 | .80 | .20 | 1280 | 640  | 80   | .8063 | .1937 | 1274 | 612  | 74   | 1280 | 599  | 80   | 41 | .87 |
| 2000 | .85 | .15 | 1445 | 510  | 45   | .8568 | .1432 | 1440 | 481  | 40   | 1445 | 472  | 45   | 38 | .77 |
| 2000 | .90 | .10 | 1620 | 360  | 20   | .9069 | .0931 | 1617 | 332  | 17   | 1620 | 326  | 20   | 34 | .62 |
| 2000 | .95 | .05 | 1805 | 190  | 5    | .9559 | .0441 | 1804 | 167  | 4    | 1805 | 164  | 5    | 26 | .38 |
| 3000 | .05 | .95 | 8    | 285  | 2708 | .0452 | .9548 | 6    | 256  | 2706 | 8    | 254  | 2708 | 31 | .37 |
| 3000 | .10 | .90 | 30   | 540  | 2430 | .0944 | .9056 | 26   | 506  | 2426 | 30   | 499  | 2430 | 41 | .61 |
| 3000 | .15 | .85 | 68   | 765  | 2168 | .1445 | .8555 | 62   | 730  | 2162 | 68   | 718  | 2168 | 47 | .77 |
| 3000 | .20 | .80 | 120  | 960  | 1920 | .1949 | .8051 | 112  | 926  | 1912 | 120  | 910  | 1920 | 50 | .87 |
| 3000 | .25 | .75 | 188  | 1125 | 1688 | .2456 | .7544 | 178  | 1092 | 1678 | 188  | 1073 | 1688 | 52 | .93 |
| 3000 | .30 | .70 | 270  | 1260 | 1470 | .2964 | .7036 | 259  | 1229 | 1459 | 270  | 1207 | 1470 | 53 | .96 |
| 3000 | .35 | .65 | 368  | 1365 | 1268 | .3473 | .6527 | 355  | 1336 | 1255 | 368  | 1312 | 1268 | 53 | .97 |
| 3000 | .40 | .60 | 480  | 1440 | 1080 | .3982 | .6018 | 467  | 1412 | 1067 | 480  | 1386 | 1080 | 54 | .98 |
| 3000 | .45 | .55 | 608  | 1485 | 908  | .4491 | .5509 | 594  | 1458 | 894  | 608  | 1431 | 908  | 54 | .98 |
| 3000 | .50 | .50 | 750  | 1500 | 750  | .5000 | .5000 | 737  | 1473 | 737  | 750  | 1446 | 750  | 54 | .98 |
| 3000 | .55 | .45 | 908  | 1485 | 608  | .5509 | .4491 | 894  | 1458 | 594  | 908  | 1431 | 608  | 54 | .98 |
| 3000 | .60 | .40 | 1080 | 1440 | 480  | .6018 | .3982 | 1067 | 1412 | 467  | 1080 | 1386 | 480  | 54 | .98 |
| 3000 | .65 | .35 | 1268 | 1365 | 368  | .6527 | .3473 | 1255 | 1336 | 355  | 1268 | 1312 | 368  | 53 | .97 |
| 3000 | .70 | .30 | 1470 | 1260 | 270  | .7036 | .2964 | 1459 | 1229 | 259  | 1470 | 1207 | 270  | 53 | .96 |
| 3000 | .75 | .25 | 1688 | 1125 | 188  | .7544 | .2456 | 1678 | 1092 | 178  | 1688 | 1073 | 188  | 52 | .93 |
| 3000 | .80 | .20 | 1920 | 960  | 120  | .8051 | .1949 | 1912 | 926  | 112  | 1920 | 910  | 120  | 50 | .87 |
| 3000 | .85 | .15 | 2168 | 765  | 68   | .8555 | .1445 | 2162 | 730  | 62   | 2168 | 718  | 68   | 47 | .77 |
| 3000 | .90 | .10 | 2430 | 540  | 30   | .9056 | .0944 | 2426 | 506  | 26   | 2430 | 499  | 30   | 41 | .61 |
| 3000 | .95 | .05 | 2708 | 285  | 8    | .9548 | .0452 | 2706 | 256  | 6    | 2708 | 254  | 8    | 31 | .37 |

|      |     |     |      |      |      |       |       |      |      |      |      |      |      |    |     |
|------|-----|-----|------|------|------|-------|-------|------|------|------|------|------|------|----|-----|
| 4000 | .05 | .95 | 10   | 380  | 3610 | .0459 | .9541 | 8    | 347  | 3608 | 10   | 344  | 3610 | 36 | .36 |
| 4000 | .10 | .90 | 40   | 720  | 3240 | .0952 | .9048 | 36   | 681  | 3236 | 40   | 672  | 3240 | 48 | .60 |
| 4000 | .15 | .85 | 90   | 1020 | 2890 | .1452 | .8548 | 83   | 980  | 2883 | 90   | 966  | 2890 | 54 | .76 |
| 4000 | .20 | .80 | 160  | 1280 | 2560 | .1956 | .8044 | 151  | 1241 | 2551 | 160  | 1222 | 2560 | 58 | .86 |
| 4000 | .25 | .75 | 250  | 1500 | 2250 | .2462 | .7538 | 239  | 1462 | 2239 | 250  | 1440 | 2250 | 60 | .92 |
| 4000 | .30 | .70 | 360  | 1680 | 1960 | .2969 | .7031 | 347  | 1644 | 1947 | 360  | 1619 | 1960 | 61 | .96 |
| 4000 | .35 | .65 | 490  | 1820 | 1690 | .3476 | .6524 | 476  | 1786 | 1676 | 490  | 1758 | 1690 | 62 | .97 |
| 4000 | .40 | .60 | 640  | 1920 | 1440 | .3984 | .6016 | 625  | 1888 | 1425 | 640  | 1858 | 1440 | 62 | .98 |
| 4000 | .45 | .55 | 810  | 1980 | 1210 | .4492 | .5508 | 795  | 1949 | 1195 | 810  | 1918 | 1210 | 62 | .98 |
| 4000 | .50 | .50 | 1000 | 2000 | 1000 | .5000 | .5000 | 985  | 1969 | 985  | 1000 | 1938 | 1000 | 62 | .98 |
| 4000 | .55 | .45 | 1210 | 1980 | 810  | .5508 | .4492 | 1195 | 1949 | 795  | 1210 | 1918 | 810  | 62 | .98 |
| 4000 | .60 | .40 | 1440 | 1920 | 640  | .6016 | .3984 | 1425 | 1888 | 625  | 1440 | 1858 | 640  | 62 | .98 |
| 4000 | .65 | .35 | 1690 | 1820 | 490  | .6524 | .3476 | 1676 | 1786 | 476  | 1690 | 1758 | 490  | 62 | .97 |
| 4000 | .70 | .30 | 1960 | 1680 | 360  | .7031 | .2969 | 1947 | 1644 | 347  | 1960 | 1619 | 360  | 61 | .96 |
| 4000 | .75 | .25 | 2250 | 1500 | 250  | .7538 | .2462 | 2239 | 1462 | 239  | 2250 | 1440 | 250  | 60 | .92 |
| 4000 | .80 | .20 | 2560 | 1280 | 160  | .8044 | .1956 | 2551 | 1241 | 151  | 2560 | 1222 | 160  | 58 | .86 |
| 4000 | .85 | .15 | 2890 | 1020 | 90   | .8548 | .1452 | 2883 | 980  | 83   | 2890 | 966  | 90   | 54 | .76 |
| 4000 | .90 | .10 | 3240 | 720  | 40   | .9048 | .0952 | 3236 | 681  | 36   | 3240 | 672  | 40   | 48 | .60 |
| 4000 | .95 | .05 | 3610 | 380  | 10   | .9541 | .0459 | 3608 | 347  | 8    | 3610 | 344  | 10   | 36 | .36 |
| 5000 | .05 | .95 | 13   | 475  | 4513 | .0463 | .9537 | 11   | 438  | 4511 | 13   | 434  | 4513 | 41 | .36 |
| 5000 | .10 | .90 | 50   | 900  | 4050 | .0957 | .9043 | 45   | 856  | 4045 | 50   | 847  | 4050 | 53 | .60 |
| 5000 | .15 | .85 | 113  | 1275 | 3613 | .1457 | .8543 | 105  | 1230 | 3605 | 113  | 1215 | 3613 | 60 | .76 |
| 5000 | .20 | .80 | 200  | 1600 | 3200 | .1961 | .8039 | 190  | 1556 | 3190 | 200  | 1535 | 3200 | 65 | .86 |
| 5000 | .25 | .75 | 313  | 1875 | 2813 | .2466 | .7534 | 300  | 1833 | 2800 | 313  | 1808 | 2813 | 67 | .92 |
| 5000 | .30 | .70 | 450  | 2100 | 2450 | .2972 | .7028 | 436  | 2060 | 2436 | 450  | 2032 | 2450 | 68 | .95 |
| 5000 | .35 | .65 | 613  | 2275 | 2113 | .3479 | .6521 | 597  | 2237 | 2097 | 613  | 2206 | 2113 | 69 | .97 |
| 5000 | .40 | .60 | 800  | 2400 | 1800 | .3986 | .6014 | 783  | 2364 | 1783 | 800  | 2331 | 1800 | 69 | .97 |
| 5000 | .45 | .55 | 1013 | 2475 | 1513 | .4493 | .5507 | 995  | 2440 | 1495 | 1013 | 2406 | 1513 | 69 | .97 |
| 5000 | .50 | .50 | 1250 | 2500 | 1250 | .5000 | .5000 | 1233 | 2465 | 1233 | 1250 | 2431 | 1250 | 69 | .97 |
| 5000 | .55 | .45 | 1513 | 2475 | 1013 | .5507 | .4493 | 1495 | 2440 | 995  | 1513 | 2406 | 1013 | 69 | .97 |
| 5000 | .60 | .40 | 1800 | 2400 | 800  | .6014 | .3986 | 1783 | 2364 | 783  | 1800 | 2331 | 800  | 69 | .97 |
| 5000 | .65 | .35 | 2113 | 2275 | 613  | .6521 | .3479 | 2097 | 2237 | 597  | 2113 | 2206 | 613  | 69 | .97 |
| 5000 | .70 | .30 | 2450 | 2100 | 450  | .7028 | .2972 | 2436 | 2060 | 436  | 2450 | 2032 | 450  | 68 | .95 |

|      |     |     |      |      |      |       |       |      |      |      |      |      |      |    |     |
|------|-----|-----|------|------|------|-------|-------|------|------|------|------|------|------|----|-----|
| 5000 | .75 | .25 | 2813 | 1875 | 313  | .7534 | .2466 | 2800 | 1833 | 300  | 2813 | 1808 | 313  | 67 | .92 |
| 5000 | .80 | .20 | 3200 | 1600 | 200  | .8039 | .1961 | 3190 | 1556 | 190  | 3200 | 1535 | 200  | 65 | .86 |
| 5000 | .85 | .15 | 3613 | 1275 | 113  | .8543 | .1457 | 3605 | 1230 | 105  | 3613 | 1215 | 113  | 60 | .76 |
| 5000 | .90 | .10 | 4050 | 900  | 50   | .9043 | .0957 | 4045 | 856  | 45   | 4050 | 847  | 50   | 53 | .60 |
| 5000 | .95 | .05 | 4513 | 475  | 13   | .9537 | .0463 | 4511 | 438  | 11   | 4513 | 434  | 13   | 41 | .36 |
| 6000 | .05 | .95 | 15   | 570  | 5415 | .0466 | .9534 | 13   | 530  | 5413 | 15   | 525  | 5415 | 45 | .36 |
| 6000 | .10 | .90 | 60   | 1080 | 4860 | .0961 | .9039 | 55   | 1032 | 4855 | 60   | 1022 | 4860 | 58 | .59 |
| 6000 | .15 | .85 | 135  | 1530 | 4335 | .1461 | .8539 | 127  | 1481 | 4327 | 135  | 1464 | 4335 | 66 | .75 |
| 6000 | .20 | .80 | 240  | 1920 | 3840 | .1964 | .8036 | 229  | 1872 | 3829 | 240  | 1849 | 3840 | 71 | .86 |
| 6000 | .25 | .75 | 375  | 2250 | 3375 | .2469 | .7531 | 361  | 2204 | 3361 | 375  | 2177 | 3375 | 74 | .92 |
| 6000 | .30 | .70 | 540  | 2520 | 2940 | .2975 | .7025 | 524  | 2476 | 2924 | 540  | 2445 | 2940 | 75 | .95 |
| 6000 | .35 | .65 | 735  | 2730 | 2535 | .3481 | .6519 | 718  | 2689 | 2518 | 735  | 2654 | 2535 | 76 | .97 |
| 6000 | .40 | .60 | 960  | 2880 | 2160 | .3987 | .6013 | 942  | 2841 | 2142 | 960  | 2804 | 2160 | 76 | .97 |
| 6000 | .45 | .55 | 1215 | 2970 | 1815 | .4494 | .5506 | 1196 | 2932 | 1796 | 1215 | 2894 | 1815 | 76 | .97 |
| 6000 | .50 | .50 | 1500 | 3000 | 1500 | .5000 | .5000 | 1481 | 2962 | 1481 | 1500 | 2924 | 1500 | 76 | .97 |
| 6000 | .55 | .45 | 1815 | 2970 | 1215 | .5506 | .4494 | 1796 | 2932 | 1196 | 1815 | 2894 | 1215 | 76 | .97 |
| 6000 | .60 | .40 | 2160 | 2880 | 960  | .6013 | .3987 | 2142 | 2841 | 942  | 2160 | 2804 | 960  | 76 | .97 |
| 6000 | .65 | .35 | 2535 | 2730 | 735  | .6519 | .3481 | 2518 | 2689 | 718  | 2535 | 2654 | 735  | 76 | .97 |
| 6000 | .70 | .30 | 2940 | 2520 | 540  | .7025 | .2975 | 2924 | 2476 | 524  | 2940 | 2445 | 540  | 75 | .95 |
| 6000 | .75 | .25 | 3375 | 2250 | 375  | .7531 | .2469 | 3361 | 2204 | 361  | 3375 | 2177 | 375  | 74 | .92 |
| 6000 | .80 | .20 | 3840 | 1920 | 240  | .8036 | .1964 | 3829 | 1872 | 229  | 3840 | 1849 | 240  | 71 | .86 |
| 6000 | .85 | .15 | 4335 | 1530 | 135  | .8539 | .1461 | 4327 | 1481 | 127  | 4335 | 1464 | 135  | 66 | .75 |
| 6000 | .90 | .10 | 4860 | 1080 | 60   | .9039 | .0961 | 4855 | 1032 | 55   | 4860 | 1022 | 60   | 58 | .59 |
| 6000 | .95 | .05 | 5415 | 570  | 15   | .9534 | .0466 | 5413 | 530  | 13   | 5415 | 525  | 15   | 45 | .36 |
| 7000 | .05 | .95 | 18   | 665  | 6318 | .0469 | .9531 | 15   | 621  | 6315 | 18   | 617  | 6318 | 48 | .35 |
| 7000 | .10 | .90 | 70   | 1260 | 5670 | .0964 | .9036 | 64   | 1208 | 5664 | 70   | 1197 | 5670 | 63 | .59 |
| 7000 | .15 | .85 | 158  | 1785 | 5058 | .1464 | .8536 | 148  | 1732 | 5048 | 158  | 1714 | 5058 | 71 | .75 |
| 7000 | .20 | .80 | 280  | 2240 | 4480 | .1967 | .8033 | 268  | 2188 | 4468 | 280  | 2164 | 4480 | 76 | .86 |
| 7000 | .25 | .75 | 438  | 2625 | 3938 | .2471 | .7529 | 423  | 2575 | 3923 | 438  | 2546 | 3938 | 79 | .92 |
| 7000 | .30 | .70 | 630  | 2940 | 3430 | .2977 | .7023 | 613  | 2893 | 3413 | 630  | 2859 | 3430 | 81 | .95 |
| 7000 | .35 | .65 | 858  | 3185 | 2958 | .3482 | .6518 | 839  | 3140 | 2939 | 858  | 3103 | 2958 | 82 | .97 |
| 7000 | .40 | .60 | 1120 | 3360 | 2520 | .3988 | .6012 | 1100 | 3317 | 2500 | 1120 | 3278 | 2520 | 82 | .97 |
| 7000 | .45 | .55 | 1418 | 3465 | 2118 | .4494 | .5506 | 1397 | 3424 | 2097 | 1418 | 3383 | 2118 | 82 | .97 |

|      |     |     |      |      |      |       |       |      |      |      |      |      |      |    |     |
|------|-----|-----|------|------|------|-------|-------|------|------|------|------|------|------|----|-----|
| 7000 | .50 | .50 | 1750 | 3500 | 1750 | .5000 | .5000 | 1730 | 3459 | 1730 | 1750 | 3418 | 1750 | 82 | .97 |
| 7000 | .55 | .45 | 2118 | 3465 | 1418 | .5506 | .4494 | 2097 | 3424 | 1397 | 2118 | 3383 | 1418 | 82 | .97 |
| 7000 | .60 | .40 | 2520 | 3360 | 1120 | .6012 | .3988 | 2500 | 3317 | 1100 | 2520 | 3278 | 1120 | 82 | .97 |
| 7000 | .65 | .35 | 2958 | 3185 | 858  | .6518 | .3482 | 2939 | 3140 | 839  | 2958 | 3103 | 858  | 82 | .97 |
| 7000 | .70 | .30 | 3430 | 2940 | 630  | .7023 | .2977 | 3413 | 2893 | 613  | 3430 | 2859 | 630  | 81 | .95 |
| 7000 | .75 | .25 | 3938 | 2625 | 438  | .7529 | .2471 | 3923 | 2575 | 423  | 3938 | 2546 | 438  | 79 | .92 |
| 7000 | .80 | .20 | 4480 | 2240 | 280  | .8033 | .1967 | 4468 | 2188 | 268  | 4480 | 2164 | 280  | 76 | .86 |
| 7000 | .85 | .15 | 5058 | 1785 | 158  | .8536 | .1464 | 5048 | 1732 | 148  | 5058 | 1714 | 158  | 71 | .75 |
| 7000 | .90 | .10 | 5670 | 1260 | 70   | .9036 | .0964 | 5664 | 1208 | 64   | 5670 | 1197 | 70   | 63 | .59 |
| 7000 | .95 | .05 | 6318 | 665  | 18   | .9531 | .0469 | 6315 | 621  | 15   | 6318 | 617  | 18   | 48 | .35 |
| 8000 | .05 | .95 | 20   | 760  | 7220 | .0471 | .9529 | 18   | 713  | 7218 | 20   | 709  | 7220 | 51 | .35 |
| 8000 | .10 | .90 | 80   | 1440 | 6480 | .0966 | .9034 | 74   | 1385 | 6474 | 80   | 1373 | 6480 | 67 | .59 |
| 8000 | .15 | .85 | 180  | 2040 | 5780 | .1466 | .8534 | 170  | 1983 | 5770 | 180  | 1964 | 5780 | 76 | .75 |
| 8000 | .20 | .80 | 320  | 2560 | 5120 | .1969 | .8031 | 307  | 2504 | 5107 | 320  | 2478 | 5120 | 82 | .85 |
| 8000 | .25 | .75 | 500  | 3000 | 4500 | .2473 | .7527 | 484  | 2947 | 4484 | 500  | 2915 | 4500 | 85 | .92 |
| 8000 | .30 | .70 | 720  | 3360 | 3920 | .2978 | .7022 | 702  | 3310 | 3902 | 720  | 3273 | 3920 | 87 | .95 |
| 8000 | .35 | .65 | 980  | 3640 | 3380 | .3483 | .6517 | 960  | 3592 | 3360 | 980  | 3553 | 3380 | 87 | .97 |
| 8000 | .40 | .60 | 1280 | 3840 | 2880 | .3989 | .6011 | 1259 | 3794 | 2859 | 1280 | 3752 | 2880 | 88 | .97 |
| 8000 | .45 | .55 | 1620 | 3960 | 2420 | .4494 | .5506 | 1598 | 3916 | 2398 | 1620 | 3872 | 2420 | 88 | .97 |
| 8000 | .50 | .50 | 2000 | 4000 | 2000 | .5000 | .5000 | 1978 | 3956 | 1978 | 2000 | 3912 | 2000 | 88 | .97 |
| 8000 | .55 | .45 | 2420 | 3960 | 1620 | .5506 | .4494 | 2398 | 3916 | 1598 | 2420 | 3872 | 1620 | 88 | .97 |
| 8000 | .60 | .40 | 2880 | 3840 | 1280 | .6011 | .3989 | 2859 | 3794 | 1259 | 2880 | 3752 | 1280 | 88 | .97 |
| 8000 | .65 | .35 | 3380 | 3640 | 980  | .6517 | .3483 | 3360 | 3592 | 960  | 3380 | 3553 | 980  | 87 | .97 |
| 8000 | .70 | .30 | 3920 | 3360 | 720  | .7022 | .2978 | 3902 | 3310 | 702  | 3920 | 3273 | 720  | 87 | .95 |
| 8000 | .75 | .25 | 4500 | 3000 | 500  | .7527 | .2473 | 4484 | 2947 | 484  | 4500 | 2915 | 500  | 85 | .92 |
| 8000 | .80 | .20 | 5120 | 2560 | 320  | .8031 | .1969 | 5107 | 2504 | 307  | 5120 | 2478 | 320  | 82 | .85 |
| 8000 | .85 | .15 | 5780 | 2040 | 180  | .8534 | .1466 | 5770 | 1983 | 170  | 5780 | 1964 | 180  | 76 | .75 |
| 8000 | .90 | .10 | 6480 | 1440 | 80   | .9034 | .0966 | 6474 | 1385 | 74   | 6480 | 1373 | 80   | 67 | .59 |
| 8000 | .95 | .05 | 7220 | 760  | 20   | .9529 | .0471 | 7218 | 713  | 18   | 7220 | 709  | 20   | 51 | .35 |
| 9000 | .05 | .95 | 23   | 855  | 8123 | .0473 | .9527 | 20   | 806  | 8120 | 23   | 800  | 8123 | 55 | .35 |
| 9000 | .10 | .90 | 90   | 1620 | 7290 | .0968 | .9032 | 84   | 1561 | 7284 | 90   | 1549 | 7290 | 71 | .59 |
| 9000 | .15 | .85 | 203  | 2295 | 6503 | .1468 | .8532 | 192  | 2234 | 6492 | 203  | 2214 | 6503 | 81 | .75 |
| 9000 | .20 | .80 | 360  | 2880 | 5760 | .1971 | .8029 | 346  | 2821 | 5746 | 360  | 2793 | 5760 | 87 | .85 |

|       |     |     |      |      |      |       |       |      |      |      |      |      |      |    |     |
|-------|-----|-----|------|------|------|-------|-------|------|------|------|------|------|------|----|-----|
| 9000  | .25 | .75 | 563  | 3375 | 5063 | .2475 | .7525 | 546  | 3319 | 5046 | 563  | 3285 | 5063 | 90 | .92 |
| 9000  | .30 | .70 | 810  | 3780 | 4410 | .2979 | .7021 | 791  | 3727 | 4391 | 810  | 3688 | 4410 | 92 | .95 |
| 9000  | .35 | .65 | 1103 | 4095 | 3803 | .3484 | .6516 | 1081 | 4044 | 3781 | 1103 | 4002 | 3803 | 93 | .96 |
| 9000  | .40 | .60 | 1440 | 4320 | 3240 | .3990 | .6010 | 1418 | 4272 | 3218 | 1440 | 4227 | 3240 | 93 | .97 |
| 9000  | .45 | .55 | 1823 | 4455 | 2723 | .4495 | .5505 | 1799 | 4408 | 2699 | 1823 | 4362 | 2723 | 93 | .97 |
| 9000  | .50 | .50 | 2250 | 4500 | 2250 | .5000 | .5000 | 2227 | 4454 | 2227 | 2250 | 4407 | 2250 | 93 | .97 |
| 9000  | .55 | .45 | 2723 | 4455 | 1823 | .5505 | .4495 | 2699 | 4408 | 1799 | 2723 | 4362 | 1823 | 93 | .97 |
| 9000  | .60 | .40 | 3240 | 4320 | 1440 | .6010 | .3990 | 3218 | 4272 | 1418 | 3240 | 4227 | 1440 | 93 | .97 |
| 9000  | .65 | .35 | 3803 | 4095 | 1103 | .6516 | .3484 | 3781 | 4044 | 1081 | 3803 | 4002 | 1103 | 93 | .96 |
| 9000  | .70 | .30 | 4410 | 3780 | 810  | .7021 | .2979 | 4391 | 3727 | 791  | 4410 | 3688 | 810  | 92 | .95 |
| 9000  | .75 | .25 | 5063 | 3375 | 563  | .7525 | .2475 | 546  | 3319 | 546  | 5063 | 3285 | 563  | 90 | .92 |
| 9000  | .80 | .20 | 5760 | 2880 | 360  | .8029 | .1971 | 5746 | 2821 | 346  | 5760 | 2793 | 360  | 87 | .85 |
| 9000  | .85 | .15 | 6503 | 2295 | 203  | .8532 | .1468 | 6492 | 2234 | 192  | 6503 | 2214 | 203  | 81 | .75 |
| 9000  | .90 | .10 | 7290 | 1620 | 90   | .9032 | .0968 | 7284 | 1561 | 84   | 7290 | 1549 | 90   | 71 | .59 |
| 9000  | .95 | .05 | 8123 | 855  | 23   | .9527 | .0473 | 8120 | 806  | 20   | 8123 | 800  | 23   | 55 | .35 |
| 10000 | .05 | .95 | 25   | 950  | 9025 | .0474 | .9526 | 22   | 898  | 9022 | 25   | 893  | 9025 | 57 | .35 |
| 10000 | .10 | .90 | 100  | 1800 | 8100 | .0970 | .9030 | 93   | 1738 | 8093 | 100  | 1725 | 8100 | 75 | .59 |
| 10000 | .15 | .85 | 225  | 2550 | 7225 | .1470 | .8530 | 214  | 2486 | 7214 | 225  | 2465 | 7225 | 85 | .75 |
| 10000 | .20 | .80 | 400  | 3200 | 6400 | .1972 | .8028 | 385  | 3138 | 6385 | 400  | 3109 | 6400 | 91 | .85 |
| 10000 | .25 | .75 | 625  | 3750 | 5625 | .2476 | .7524 | 607  | 3691 | 5607 | 625  | 3655 | 5625 | 95 | .91 |
| 10000 | .30 | .70 | 900  | 4200 | 4900 | .2980 | .7020 | 880  | 4144 | 4880 | 900  | 4103 | 4900 | 97 | .95 |
| 10000 | .35 | .65 | 1225 | 4550 | 4225 | .3485 | .6515 | 1203 | 4497 | 4203 | 1225 | 4452 | 4225 | 98 | .96 |
| 10000 | .40 | .60 | 1600 | 4800 | 3600 | .3990 | .6010 | 1577 | 4749 | 3577 | 1600 | 4702 | 3600 | 98 | .97 |
| 10000 | .45 | .55 | 2025 | 4950 | 3025 | .4495 | .5505 | 2001 | 4901 | 3001 | 2025 | 4852 | 3025 | 98 | .97 |
| 10000 | .50 | .50 | 2500 | 5000 | 2500 | .5000 | .5000 | 2476 | 4951 | 2476 | 2500 | 4902 | 2500 | 98 | .97 |
| 10000 | .55 | .45 | 3025 | 4950 | 2025 | .5505 | .4495 | 3001 | 4901 | 2001 | 3025 | 4852 | 2025 | 98 | .97 |
| 10000 | .60 | .40 | 3600 | 4800 | 1600 | .6010 | .3990 | 3577 | 4749 | 1577 | 3600 | 4702 | 1600 | 98 | .97 |
| 10000 | .65 | .35 | 4225 | 4550 | 1225 | .6515 | .3485 | 4203 | 4497 | 1203 | 4225 | 4452 | 1225 | 98 | .96 |
| 10000 | .70 | .30 | 4900 | 4200 | 900  | .7020 | .2980 | 4880 | 4144 | 880  | 4900 | 4103 | 900  | 97 | .95 |
| 10000 | .75 | .25 | 5625 | 3750 | 625  | .7524 | .2476 | 5607 | 3691 | 607  | 5625 | 3655 | 625  | 95 | .91 |
| 10000 | .80 | .20 | 6400 | 3200 | 400  | .8028 | .1972 | 6385 | 3138 | 385  | 6400 | 3109 | 400  | 91 | .85 |
| 10000 | .85 | .15 | 7225 | 2550 | 225  | .8530 | .1470 | 7214 | 2486 | 214  | 7225 | 2465 | 225  | 85 | .75 |
| 10000 | .90 | .10 | 8100 | 1800 | 100  | .9030 | .0970 | 8093 | 1738 | 93   | 8100 | 1725 | 100  | 75 | .59 |

|       |     |     |      |      |       |       |       |      |      |       |      |      |       |     |     |
|-------|-----|-----|------|------|-------|-------|-------|------|------|-------|------|------|-------|-----|-----|
| 10000 | .95 | .05 | 9025 | 950  | 25    | .9526 | .0474 | 9022 | 898  | 22    | 9025 | 893  | 25    | 57  | .35 |
| 11000 | .05 | .95 | 28   | 1045 | 9928  | .0475 | .9525 | 25   | 990  | 9925  | 28   | 985  | 9928  | 60  | .35 |
| 11000 | .10 | .90 | 110  | 1980 | 8910  | .0971 | .9029 | 103  | 1915 | 8903  | 110  | 1901 | 8910  | 79  | .59 |
| 11000 | .15 | .85 | 248  | 2805 | 7948  | .1471 | .8529 | 236  | 2738 | 7936  | 248  | 2715 | 7948  | 90  | .75 |
| 11000 | .20 | .80 | 440  | 3520 | 7040  | .1974 | .8026 | 425  | 3455 | 7025  | 440  | 3424 | 7040  | 96  | .85 |
| 11000 | .25 | .75 | 688  | 4125 | 6188  | .2477 | .7523 | 669  | 4063 | 6169  | 688  | 4025 | 6188  | 100 | .91 |
| 11000 | .30 | .70 | 990  | 4620 | 5390  | .2981 | .7019 | 969  | 4561 | 5369  | 990  | 4519 | 5390  | 101 | .95 |
| 11000 | .35 | .65 | 1348 | 5005 | 4648  | .3486 | .6514 | 1324 | 4949 | 4624  | 1348 | 4903 | 4648  | 102 | .96 |
| 11000 | .40 | .60 | 1760 | 5280 | 3960  | .3991 | .6009 | 1735 | 5227 | 3935  | 1760 | 5177 | 3960  | 103 | .97 |
| 11000 | .45 | .55 | 2228 | 5445 | 3328  | .4495 | .5505 | 2202 | 5393 | 3302  | 2228 | 5342 | 3328  | 103 | .97 |
| 11000 | .50 | .50 | 2750 | 5500 | 2750  | .5000 | .5000 | 2724 | 5449 | 2724  | 2750 | 5397 | 2750  | 103 | .97 |
| 11000 | .55 | .45 | 3328 | 5445 | 2228  | .5505 | .4495 | 3302 | 5393 | 2202  | 3328 | 5342 | 2228  | 103 | .97 |
| 11000 | .60 | .40 | 3960 | 5280 | 1760  | .6009 | .3991 | 3935 | 5227 | 1735  | 3960 | 5177 | 1760  | 103 | .97 |
| 11000 | .65 | .35 | 4648 | 5005 | 1348  | .6514 | .3486 | 4624 | 4949 | 1324  | 4648 | 4903 | 1348  | 102 | .96 |
| 11000 | .70 | .30 | 5390 | 4620 | 990   | .7019 | .2981 | 5369 | 4561 | 969   | 5390 | 4519 | 990   | 101 | .95 |
| 11000 | .75 | .25 | 6188 | 4125 | 688   | .7523 | .2477 | 6169 | 4063 | 669   | 6188 | 4025 | 688   | 100 | .91 |
| 11000 | .80 | .20 | 7040 | 3520 | 440   | .8026 | .1974 | 7025 | 3455 | 425   | 7040 | 3424 | 440   | 96  | .85 |
| 11000 | .85 | .15 | 7948 | 2805 | 248   | .8529 | .1471 | 7936 | 2738 | 236   | 7948 | 2715 | 248   | 90  | .75 |
| 11000 | .90 | .10 | 8910 | 1980 | 110   | .9029 | .0971 | 8903 | 1915 | 103   | 8910 | 1901 | 110   | 79  | .59 |
| 11000 | .95 | .05 | 9928 | 1045 | 28    | .9525 | .0475 | 9925 | 990  | 25    | 9928 | 985  | 28    | 60  | .35 |
| 12000 | .05 | .95 | 30   | 1140 | 10830 | .0476 | .9524 | 27   | 1083 | 10827 | 30   | 1077 | 10830 | 63  | .35 |
| 12000 | .10 | .90 | 120  | 2160 | 9720  | .0972 | .9028 | 113  | 2092 | 9713  | 120  | 2078 | 9720  | 82  | .59 |
| 12000 | .15 | .85 | 270  | 3060 | 8670  | .1472 | .8528 | 258  | 2990 | 8658  | 270  | 2966 | 8670  | 94  | .75 |
| 12000 | .20 | .80 | 480  | 3840 | 7680  | .1975 | .8025 | 464  | 3772 | 7664  | 480  | 3740 | 7680  | 100 | .85 |
| 12000 | .25 | .75 | 750  | 4500 | 6750  | .2478 | .7522 | 731  | 4435 | 6731  | 750  | 4396 | 6750  | 104 | .91 |
| 12000 | .30 | .70 | 1080 | 5040 | 5880  | .2982 | .7018 | 1058 | 4978 | 5858  | 1080 | 4934 | 5880  | 106 | .95 |
| 12000 | .35 | .65 | 1470 | 5460 | 5070  | .3487 | .6513 | 1446 | 5402 | 5046  | 1470 | 5353 | 5070  | 107 | .96 |
| 12000 | .40 | .60 | 1920 | 5760 | 4320  | .3991 | .6009 | 1894 | 5704 | 4294  | 1920 | 5653 | 4320  | 107 | .97 |
| 12000 | .45 | .55 | 2430 | 5940 | 3630  | .4495 | .5505 | 2403 | 5886 | 3603  | 2430 | 5833 | 3630  | 107 | .97 |
| 12000 | .50 | .50 | 3000 | 6000 | 3000  | .5000 | .5000 | 2973 | 5946 | 2973  | 3000 | 5893 | 3000  | 107 | .97 |
| 12000 | .55 | .45 | 3630 | 5940 | 2430  | .5505 | .4495 | 3603 | 5886 | 2403  | 3630 | 5833 | 2430  | 107 | .97 |
| 12000 | .60 | .40 | 4320 | 5760 | 1920  | .6009 | .3991 | 4294 | 5704 | 1894  | 4320 | 5653 | 1920  | 107 | .97 |
| 12000 | .65 | .35 | 5070 | 5460 | 1470  | .6513 | .3487 | 5046 | 5402 | 1446  | 5070 | 5353 | 1470  | 107 | .96 |

|       |     |     |       |      |       |       |       |       |      |       |       |      |       |     |     |
|-------|-----|-----|-------|------|-------|-------|-------|-------|------|-------|-------|------|-------|-----|-----|
| 12000 | .70 | .30 | 5880  | 5040 | 1080  | .7018 | .2982 | 5858  | 4978 | 1058  | 5880  | 4934 | 1080  | 106 | .95 |
| 12000 | .75 | .25 | 6750  | 4500 | 750   | .7522 | .2478 | 6731  | 4435 | 731   | 6750  | 4396 | 750   | 104 | .91 |
| 12000 | .80 | .20 | 7680  | 3840 | 480   | .8025 | .1975 | 7664  | 3772 | 464   | 7680  | 3740 | 480   | 100 | .85 |
| 12000 | .85 | .15 | 8670  | 3060 | 270   | .8528 | .1472 | 8658  | 2990 | 258   | 8670  | 2966 | 270   | 94  | .75 |
| 12000 | .90 | .10 | 9720  | 2160 | 120   | .9028 | .0972 | 9713  | 2092 | 113   | 9720  | 2078 | 120   | 82  | .59 |
| 12000 | .95 | .05 | 10830 | 1140 | 30    | .9524 | .0476 | 10827 | 1083 | 27    | 10830 | 1077 | 30    | 63  | .35 |
| 13000 | .05 | .95 | 33    | 1235 | 11733 | .0477 | .9523 | 29    | 1176 | 11729 | 33    | 1169 | 11733 | 66  | .35 |
| 13000 | .10 | .90 | 130   | 2340 | 10530 | .0973 | .9027 | 122   | 2269 | 10522 | 130   | 2254 | 10530 | 86  | .58 |
| 13000 | .15 | .85 | 293   | 3315 | 9393  | .1474 | .8526 | 280   | 3242 | 9380  | 293   | 3218 | 9393  | 97  | .75 |
| 13000 | .20 | .80 | 520   | 4160 | 8320  | .1976 | .8024 | 503   | 4089 | 8303  | 520   | 4056 | 8320  | 104 | .85 |
| 13000 | .25 | .75 | 813   | 4875 | 7313  | .2479 | .7521 | 792   | 4807 | 7292  | 813   | 4767 | 7313  | 108 | .91 |
| 13000 | .30 | .70 | 1170  | 5460 | 6370  | .2983 | .7017 | 1147  | 5396 | 6347  | 1170  | 5350 | 6370  | 110 | .95 |
| 13000 | .35 | .65 | 1593  | 5915 | 5493  | .3487 | .6513 | 1567  | 5854 | 5467  | 1593  | 5804 | 5493  | 111 | .96 |
| 13000 | .40 | .60 | 2080  | 6240 | 4680  | .3991 | .6009 | 2053  | 6182 | 4653  | 2080  | 6128 | 4680  | 112 | .97 |
| 13000 | .45 | .55 | 2633  | 6435 | 3933  | .4496 | .5504 | 2605  | 6379 | 3905  | 2633  | 6323 | 3933  | 112 | .97 |
| 13000 | .50 | .50 | 3250  | 6500 | 3250  | .5000 | .5000 | 3222  | 6444 | 3222  | 3250  | 6388 | 3250  | 112 | .97 |
| 13000 | .55 | .45 | 3933  | 6435 | 2633  | .5504 | .4496 | 3905  | 6379 | 2605  | 3933  | 6323 | 2633  | 112 | .97 |
| 13000 | .60 | .40 | 4680  | 6240 | 2080  | .6009 | .3991 | 4653  | 6182 | 2053  | 4680  | 6128 | 2080  | 112 | .97 |
| 13000 | .65 | .35 | 5493  | 5915 | 1593  | .6513 | .3487 | 5467  | 5854 | 1567  | 5493  | 5804 | 1593  | 111 | .96 |
| 13000 | .70 | .30 | 6370  | 5460 | 1170  | .7017 | .2983 | 6347  | 5396 | 1147  | 6370  | 5350 | 1170  | 110 | .95 |
| 13000 | .75 | .25 | 7313  | 4875 | 813   | .7521 | .2479 | 7292  | 4807 | 792   | 7313  | 4767 | 813   | 108 | .91 |
| 13000 | .80 | .20 | 8320  | 4160 | 520   | .8024 | .1976 | 8303  | 4089 | 503   | 8320  | 4056 | 520   | 104 | .85 |
| 13000 | .85 | .15 | 9393  | 3315 | 293   | .8526 | .1474 | 9380  | 3242 | 280   | 9393  | 3218 | 293   | 97  | .75 |
| 13000 | .90 | .10 | 10530 | 2340 | 130   | .9027 | .0973 | 10522 | 2269 | 122   | 10530 | 2254 | 130   | 86  | .58 |
| 13000 | .95 | .05 | 11733 | 1235 | 33    | .9523 | .0477 | 11729 | 1176 | 29    | 11733 | 1169 | 33    | 66  | .35 |
| 14000 | .05 | .95 | 35    | 1330 | 12635 | .0478 | .9522 | 32    | 1268 | 12632 | 35    | 1262 | 12635 | 68  | .35 |
| 14000 | .10 | .90 | 140   | 2520 | 11340 | .0974 | .9026 | 132   | 2447 | 11332 | 140   | 2431 | 11340 | 89  | .58 |
| 14000 | .15 | .85 | 315   | 3570 | 10115 | .1475 | .8525 | 302   | 3495 | 10102 | 315   | 3469 | 10115 | 101 | .75 |
| 14000 | .20 | .80 | 560   | 4480 | 8960  | .1977 | .8023 | 543   | 4406 | 8943  | 560   | 4372 | 8960  | 108 | .85 |
| 14000 | .25 | .75 | 875   | 5250 | 7875  | .2480 | .7520 | 854   | 5180 | 7854  | 875   | 5138 | 7875  | 112 | .91 |
| 14000 | .30 | .70 | 1260  | 5880 | 6860  | .2984 | .7016 | 1236  | 5814 | 6836  | 1260  | 5766 | 6860  | 114 | .95 |
| 14000 | .35 | .65 | 1715  | 6370 | 5915  | .3488 | .6512 | 1689  | 6307 | 5889  | 1715  | 6255 | 5915  | 115 | .96 |
| 14000 | .40 | .60 | 2240  | 6720 | 5040  | .3992 | .6008 | 2212  | 6660 | 5012  | 2240  | 6604 | 5040  | 116 | .97 |



|       |     |     |       |      |       |       |       |       |      |       |       |      |       |     |     |
|-------|-----|-----|-------|------|-------|-------|-------|-------|------|-------|-------|------|-------|-----|-----|
| 14000 | .45 | .55 | 2835  | 6930 | 4235  | .4496 | .5504 | 2806  | 6871 | 4206  | 2835  | 6814 | 4235  | 116 | .97 |
| 14000 | .50 | .50 | 3500  | 7000 | 3500  | .5000 | .5000 | 3471  | 6942 | 3471  | 3500  | 6884 | 3500  | 116 | .97 |
| 14000 | .55 | .45 | 4235  | 6930 | 2835  | .5504 | .4496 | 4206  | 6871 | 2806  | 4235  | 6814 | 2835  | 116 | .97 |
| 14000 | .60 | .40 | 5040  | 6720 | 2240  | .6008 | .3992 | 5012  | 6660 | 2212  | 5040  | 6604 | 2240  | 116 | .97 |
| 14000 | .65 | .35 | 5915  | 6370 | 1715  | .6512 | .3488 | 5889  | 6307 | 1689  | 5915  | 6255 | 1715  | 115 | .96 |
| 14000 | .70 | .30 | 6860  | 5880 | 1260  | .7016 | .2984 | 6836  | 5814 | 1236  | 6860  | 5766 | 1260  | 114 | .95 |
| 14000 | .75 | .25 | 7875  | 5250 | 875   | .7520 | .2480 | 7854  | 5180 | 854   | 7875  | 5138 | 875   | 112 | .91 |
| 14000 | .80 | .20 | 8960  | 4480 | 560   | .8023 | .1977 | 8943  | 4406 | 543   | 8960  | 4372 | 560   | 108 | .85 |
| 14000 | .85 | .15 | 10115 | 3570 | 315   | .8525 | .1475 | 10102 | 3495 | 302   | 10115 | 3469 | 315   | 101 | .75 |
| 14000 | .90 | .10 | 11340 | 2520 | 140   | .9026 | .0974 | 11332 | 2447 | 132   | 11340 | 2431 | 140   | 89  | .58 |
| 14000 | .95 | .05 | 12635 | 1330 | 35    | .9522 | .0478 | 12632 | 1268 | 32    | 12635 | 1262 | 35    | 68  | .35 |
| 15000 | .05 | .95 | 38    | 1425 | 13538 | .0479 | .9521 | 34    | 1361 | 13534 | 38    | 1355 | 13538 | 70  | .35 |
| 15000 | .10 | .90 | 150   | 2700 | 12150 | .0975 | .9025 | 142   | 2624 | 12142 | 150   | 2608 | 12150 | 92  | .58 |
| 15000 | .15 | .85 | 338   | 3825 | 10838 | .1475 | .8525 | 324   | 3747 | 10824 | 338   | 3720 | 10838 | 105 | .75 |
| 15000 | .20 | .80 | 600   | 4800 | 9600  | .1977 | .8023 | 582   | 4724 | 9582  | 600   | 4688 | 9600  | 112 | .85 |
| 15000 | .25 | .75 | 938   | 5625 | 8438  | .2480 | .7520 | 916   | 5552 | 8416  | 938   | 5509 | 8438  | 116 | .91 |
| 15000 | .30 | .70 | 1350  | 6300 | 7350  | .2984 | .7016 | 1325  | 6231 | 7325  | 1350  | 6182 | 7350  | 118 | .95 |
| 15000 | .35 | .65 | 1838  | 6825 | 6338  | .3488 | .6512 | 1810  | 6760 | 6310  | 1838  | 6705 | 6338  | 120 | .96 |
| 15000 | .40 | .60 | 2400  | 7200 | 5400  | .3992 | .6008 | 2371  | 7138 | 5371  | 2400  | 7080 | 5400  | 120 | .97 |
| 15000 | .45 | .55 | 3038  | 7425 | 4538  | .4496 | .5504 | 3008  | 7364 | 4508  | 3038  | 7305 | 4538  | 120 | .97 |
| 15000 | .50 | .50 | 3750  | 7500 | 3750  | .5000 | .5000 | 3720  | 7440 | 3720  | 3750  | 7380 | 3750  | 120 | .97 |
| 15000 | .55 | .45 | 4538  | 7425 | 3038  | .5504 | .4496 | 4508  | 7364 | 3008  | 4538  | 7305 | 3038  | 120 | .97 |
| 15000 | .60 | .40 | 5400  | 7200 | 2400  | .6008 | .3992 | 5371  | 7138 | 2371  | 5400  | 7080 | 2400  | 120 | .97 |
| 15000 | .65 | .35 | 6338  | 6825 | 1838  | .6512 | .3488 | 6310  | 6760 | 1810  | 6338  | 6705 | 1838  | 120 | .96 |
| 15000 | .70 | .30 | 7350  | 6300 | 1350  | .7016 | .2984 | 7325  | 6231 | 1325  | 7350  | 6182 | 1350  | 118 | .95 |
| 15000 | .75 | .25 | 8438  | 5625 | 938   | .7520 | .2480 | 8416  | 5552 | 916   | 8438  | 5509 | 938   | 116 | .91 |
| 15000 | .80 | .20 | 9600  | 4800 | 600   | .8023 | .1977 | 9582  | 4724 | 582   | 9600  | 4688 | 600   | 112 | .85 |
| 15000 | .85 | .15 | 10838 | 3825 | 338   | .8525 | .1475 | 10824 | 3747 | 324   | 10838 | 3720 | 338   | 105 | .75 |
| 15000 | .90 | .10 | 12150 | 2700 | 150   | .9025 | .0975 | 12142 | 2624 | 142   | 12150 | 2608 | 150   | 92  | .58 |
| 15000 | .95 | .05 | 13538 | 1425 | 38    | .9521 | .0479 | 13534 | 1361 | 34    | 13538 | 1355 | 38    | 70  | .35 |
| 16000 | .05 | .95 | 40    | 1520 | 14440 | .0479 | .9521 | 37    | 1454 | 14437 | 40    | 1447 | 14440 | 73  | .35 |
| 16000 | .10 | .90 | 160   | 2880 | 12960 | .0976 | .9024 | 152   | 2802 | 12952 | 160   | 2785 | 12960 | 95  | .58 |
| 16000 | .15 | .85 | 360   | 4080 | 11560 | .1476 | .8524 | 346   | 3999 | 11546 | 360   | 3972 | 11560 | 108 | .74 |

|       |     |     |       |      |       |       |       |       |      |       |       |      |       |     |     |
|-------|-----|-----|-------|------|-------|-------|-------|-------|------|-------|-------|------|-------|-----|-----|
| 16000 | .20 | .80 | 640   | 5120 | 10240 | .1978 | .8022 | 622   | 5041 | 10222 | 640   | 5004 | 10240 | 116 | .85 |
| 16000 | .25 | .75 | 1000  | 6000 | 9000  | .2481 | .7519 | 978   | 5925 | 8978  | 1000  | 5880 | 9000  | 120 | .91 |
| 16000 | .30 | .70 | 1440  | 6720 | 7840  | .2985 | .7015 | 1414  | 6649 | 7814  | 1440  | 6598 | 7840  | 122 | .95 |
| 16000 | .35 | .65 | 1960  | 7280 | 6760  | .3488 | .6512 | 1932  | 7213 | 6732  | 1960  | 7157 | 6760  | 123 | .96 |
| 16000 | .40 | .60 | 2560  | 7680 | 5760  | .3992 | .6008 | 2530  | 7616 | 5730  | 2560  | 7556 | 5760  | 124 | .97 |
| 16000 | .45 | .55 | 3240  | 7920 | 4840  | .4496 | .5504 | 3209  | 7857 | 4809  | 3240  | 7796 | 4840  | 124 | .97 |
| 16000 | .50 | .50 | 4000  | 8000 | 4000  | .5000 | .5000 | 3969  | 7938 | 3969  | 4000  | 7876 | 4000  | 124 | .97 |
| 16000 | .55 | .45 | 4840  | 7920 | 3240  | .5504 | .4496 | 4809  | 7857 | 3209  | 4840  | 7796 | 3240  | 124 | .97 |
| 16000 | .60 | .40 | 5760  | 7680 | 2560  | .6008 | .3992 | 5730  | 7616 | 2530  | 5760  | 7556 | 2560  | 124 | .97 |
| 16000 | .65 | .35 | 6760  | 7280 | 1960  | .6512 | .3488 | 6732  | 7213 | 1932  | 6760  | 7157 | 1960  | 123 | .96 |
| 16000 | .70 | .30 | 7840  | 6720 | 1440  | .7015 | .2985 | 7814  | 6649 | 1414  | 7840  | 6598 | 1440  | 122 | .95 |
| 16000 | .75 | .25 | 9000  | 6000 | 1000  | .7519 | .2481 | 8978  | 5925 | 978   | 9000  | 5880 | 1000  | 120 | .91 |
| 16000 | .80 | .20 | 10240 | 5120 | 640   | .8022 | .1978 | 10222 | 5041 | 622   | 10240 | 5004 | 640   | 116 | .85 |
| 16000 | .85 | .15 | 11560 | 4080 | 360   | .8524 | .1476 | 11546 | 3999 | 346   | 11560 | 3972 | 360   | 108 | .74 |
| 16000 | .90 | .10 | 12960 | 2880 | 160   | .9024 | .0976 | 12952 | 2802 | 152   | 12960 | 2785 | 160   | 95  | .58 |
| 16000 | .95 | .05 | 14440 | 1520 | 40    | .9521 | .0479 | 14437 | 1454 | 37    | 14440 | 1447 | 40    | 73  | .35 |
| 17000 | .05 | .95 | 43    | 1615 | 15343 | .0480 | .9520 | 39    | 1547 | 15339 | 43    | 1540 | 15343 | 75  | .34 |
| 17000 | .10 | .90 | 170   | 3060 | 13770 | .0977 | .9023 | 161   | 2979 | 13761 | 170   | 2962 | 13770 | 98  | .58 |
| 17000 | .15 | .85 | 383   | 4335 | 12283 | .1477 | .8523 | 368   | 4252 | 12268 | 383   | 4224 | 12283 | 111 | .74 |
| 17000 | .20 | .80 | 680   | 5440 | 10880 | .1979 | .8021 | 661   | 5359 | 10861 | 680   | 5321 | 10880 | 119 | .85 |
| 17000 | .25 | .75 | 1063  | 6375 | 9563  | .2482 | .7518 | 1039  | 6298 | 9539  | 1063  | 6251 | 9563  | 124 | .91 |
| 17000 | .30 | .70 | 1530  | 7140 | 8330  | .2985 | .7015 | 1504  | 7067 | 8304  | 1530  | 7014 | 8330  | 126 | .95 |
| 17000 | .35 | .65 | 2083  | 7735 | 7183  | .3489 | .6511 | 2054  | 7666 | 7154  | 2083  | 7608 | 7183  | 127 | .96 |
| 17000 | .40 | .60 | 2720  | 8160 | 6120  | .3992 | .6008 | 2689  | 8094 | 6089  | 2720  | 8032 | 6120  | 128 | .97 |
| 17000 | .45 | .55 | 3443  | 8415 | 5143  | .4496 | .5504 | 3411  | 8350 | 5111  | 3443  | 8287 | 5143  | 128 | .97 |
| 17000 | .50 | .50 | 4250  | 8500 | 4250  | .5000 | .5000 | 4218  | 8436 | 4218  | 4250  | 8372 | 4250  | 128 | .97 |
| 17000 | .55 | .45 | 5143  | 8415 | 3443  | .5504 | .4496 | 5111  | 8350 | 3411  | 5143  | 8287 | 3443  | 128 | .97 |
| 17000 | .60 | .40 | 6120  | 8160 | 2720  | .6008 | .3992 | 6089  | 8094 | 2689  | 6120  | 8032 | 2720  | 128 | .97 |
| 17000 | .65 | .35 | 7183  | 7735 | 2083  | .6511 | .3489 | 7154  | 7666 | 2054  | 7183  | 7608 | 2083  | 127 | .96 |
| 17000 | .70 | .30 | 8330  | 7140 | 1530  | .7015 | .2985 | 8304  | 7067 | 1504  | 8330  | 7014 | 1530  | 126 | .95 |
| 17000 | .75 | .25 | 9563  | 6375 | 1063  | .7518 | .2482 | 9539  | 6298 | 1039  | 9563  | 6251 | 1063  | 124 | .91 |
| 17000 | .80 | .20 | 10880 | 5440 | 680   | .8021 | .1979 | 10861 | 5359 | 661   | 10880 | 5321 | 680   | 119 | .85 |
| 17000 | .85 | .15 | 12283 | 4335 | 383   | .8523 | .1477 | 12268 | 4252 | 368   | 12283 | 4224 | 383   | 111 | .74 |

|       |     |     |       |      |       |       |       |       |      |       |       |      |       |     |     |
|-------|-----|-----|-------|------|-------|-------|-------|-------|------|-------|-------|------|-------|-----|-----|
| 17000 | .90 | .10 | 13770 | 3060 | 170   | .9023 | .0977 | 13761 | 2979 | 161   | 13770 | 2962 | 170   | 98  | .58 |
| 17000 | .95 | .05 | 15343 | 1615 | 43    | .9520 | .0480 | 15339 | 1547 | 39    | 15343 | 1540 | 43    | 75  | .34 |
| 18000 | .05 | .95 | 45    | 1710 | 16245 | .0481 | .9519 | 41    | 1640 | 16241 | 45    | 1633 | 16245 | 77  | .34 |
| 18000 | .10 | .90 | 180   | 3240 | 14580 | .0977 | .9023 | 171   | 3157 | 14571 | 180   | 3139 | 14580 | 101 | .58 |
| 18000 | .15 | .85 | 405   | 4590 | 13005 | .1478 | .8522 | 390   | 4504 | 12990 | 405   | 4475 | 13005 | 115 | .74 |
| 18000 | .20 | .80 | 720   | 5760 | 11520 | .1979 | .8021 | 700   | 5676 | 11500 | 720   | 5637 | 11520 | 123 | .85 |
| 18000 | .25 | .75 | 1125  | 6750 | 10125 | .2482 | .7518 | 1101  | 6670 | 10101 | 1125  | 6623 | 10125 | 127 | .91 |
| 18000 | .30 | .70 | 1620  | 7560 | 8820  | .2985 | .7015 | 1593  | 7485 | 8793  | 1620  | 7430 | 8820  | 130 | .95 |
| 18000 | .35 | .65 | 2205  | 8190 | 7605  | .3489 | .6511 | 2175  | 8119 | 7575  | 2205  | 8059 | 7605  | 131 | .96 |
| 18000 | .40 | .60 | 2880  | 8640 | 6480  | .3993 | .6007 | 2848  | 8572 | 6448  | 2880  | 8509 | 6480  | 131 | .97 |
| 18000 | .45 | .55 | 3645  | 8910 | 5445  | .4496 | .5504 | 3612  | 8844 | 5412  | 3645  | 8779 | 5445  | 131 | .97 |
| 18000 | .50 | .50 | 4500  | 9000 | 4500  | .5000 | .5000 | 4467  | 8934 | 4467  | 4500  | 8869 | 4500  | 131 | .97 |
| 18000 | .55 | .45 | 5445  | 8910 | 3645  | .5504 | .4496 | 5412  | 8844 | 3612  | 5445  | 8779 | 3645  | 131 | .97 |
| 18000 | .60 | .40 | 6480  | 8640 | 2880  | .6007 | .3993 | 6448  | 8572 | 2848  | 6480  | 8509 | 2880  | 131 | .97 |
| 18000 | .65 | .35 | 7605  | 8190 | 2205  | .6511 | .3489 | 7575  | 8119 | 2175  | 7605  | 8059 | 2205  | 131 | .96 |
| 18000 | .70 | .30 | 8820  | 7560 | 1620  | .7015 | .2985 | 8793  | 7485 | 1593  | 8820  | 7430 | 1620  | 130 | .95 |
| 18000 | .75 | .25 | 10125 | 6750 | 1125  | .7518 | .2482 | 10101 | 6670 | 1101  | 10125 | 6623 | 1125  | 127 | .91 |
| 18000 | .80 | .20 | 11520 | 5760 | 720   | .8021 | .1979 | 11500 | 5676 | 700   | 11520 | 5637 | 720   | 123 | .85 |
| 18000 | .85 | .15 | 13005 | 4590 | 405   | .8522 | .1478 | 12990 | 4504 | 390   | 13005 | 4475 | 405   | 115 | .74 |
| 18000 | .90 | .10 | 14580 | 3240 | 180   | .9023 | .0977 | 14571 | 3157 | 171   | 14580 | 3139 | 180   | 101 | .58 |
| 18000 | .95 | .05 | 16245 | 1710 | 45    | .9519 | .0481 | 16241 | 1640 | 41    | 16245 | 1633 | 45    | 77  | .34 |
| 19000 | .05 | .95 | 48    | 1805 | 17148 | .0481 | .9519 | 44    | 1733 | 17144 | 48    | 1726 | 17148 | 79  | .34 |
| 19000 | .10 | .90 | 190   | 3420 | 15390 | .0978 | .9022 | 181   | 3335 | 15381 | 190   | 3316 | 15390 | 104 | .58 |
| 19000 | .15 | .85 | 428   | 4845 | 13728 | .1478 | .8522 | 413   | 4757 | 13713 | 428   | 4727 | 13728 | 118 | .74 |
| 19000 | .20 | .80 | 760   | 6080 | 12160 | .1980 | .8020 | 740   | 5994 | 12140 | 760   | 5954 | 12160 | 126 | .85 |
| 19000 | .25 | .75 | 1188  | 7125 | 10688 | .2483 | .7517 | 1163  | 7043 | 10663 | 1188  | 6994 | 10688 | 131 | .91 |
| 19000 | .30 | .70 | 1710  | 7980 | 9310  | .2986 | .7014 | 1682  | 7903 | 9282  | 1710  | 7847 | 9310  | 133 | .94 |
| 19000 | .35 | .65 | 2328  | 8645 | 8028  | .3489 | .6511 | 2297  | 8572 | 7997  | 2328  | 8510 | 8028  | 135 | .96 |
| 19000 | .40 | .60 | 3040  | 9120 | 6840  | .3993 | .6007 | 3008  | 9050 | 6808  | 3040  | 8985 | 6840  | 135 | .97 |
| 19000 | .45 | .55 | 3848  | 9405 | 5748  | .4496 | .5504 | 3814  | 9337 | 5714  | 3848  | 9270 | 5748  | 135 | .97 |
| 19000 | .50 | .50 | 4750  | 9500 | 4750  | .5000 | .5000 | 4716  | 9432 | 4716  | 4750  | 9365 | 4750  | 135 | .97 |
| 19000 | .55 | .45 | 5748  | 9405 | 3848  | .5504 | .4496 | 5714  | 9337 | 3814  | 5748  | 9270 | 3848  | 135 | .97 |
| 19000 | .60 | .40 | 6840  | 9120 | 3040  | .6007 | .3993 | 6808  | 9050 | 3008  | 6840  | 8985 | 3040  | 135 | .97 |

|       |     |     |       |       |       |       |       |       |      |       |       |      |       |     |     |
|-------|-----|-----|-------|-------|-------|-------|-------|-------|------|-------|-------|------|-------|-----|-----|
| 19000 | .65 | .35 | 8028  | 8645  | 2328  | .6511 | .3489 | 7997  | 8572 | 2297  | 8028  | 8510 | 2328  | 135 | .96 |
| 19000 | .70 | .30 | 9310  | 7980  | 1710  | .7014 | .2986 | 9282  | 7903 | 1682  | 9310  | 7847 | 1710  | 133 | .94 |
| 19000 | .75 | .25 | 10688 | 7125  | 1188  | .7517 | .2483 | 10663 | 7043 | 1163  | 10688 | 6994 | 1188  | 131 | .91 |
| 19000 | .80 | .20 | 12160 | 6080  | 760   | .8020 | .1980 | 12140 | 5994 | 740   | 12160 | 5954 | 760   | 126 | .85 |
| 19000 | .85 | .15 | 13728 | 4845  | 428   | .8522 | .1478 | 13713 | 4757 | 413   | 13728 | 4727 | 428   | 118 | .74 |
| 19000 | .90 | .10 | 15390 | 3420  | 190   | .9022 | .0978 | 15381 | 3335 | 181   | 15390 | 3316 | 190   | 104 | .58 |
| 19000 | .95 | .05 | 17148 | 1805  | 48    | .9519 | .0481 | 17144 | 1733 | 44    | 17148 | 1726 | 48    | 79  | .34 |
| 20000 | .05 | .95 | 50    | 1900  | 18050 | .0482 | .9518 | 46    | 1826 | 18046 | 50    | 1819 | 18050 | 81  | .34 |
| 20000 | .10 | .90 | 200   | 3600  | 16200 | .0979 | .9021 | 191   | 3512 | 16191 | 200   | 3494 | 16200 | 106 | .58 |
| 20000 | .15 | .85 | 450   | 5100  | 14450 | .1479 | .8521 | 435   | 5010 | 14435 | 450   | 4979 | 14450 | 121 | .74 |
| 20000 | .20 | .80 | 800   | 6400  | 12800 | .1980 | .8020 | 779   | 6312 | 12779 | 800   | 6271 | 12800 | 129 | .85 |
| 20000 | .25 | .75 | 1250  | 7500  | 11250 | .2483 | .7517 | 1225  | 7416 | 11225 | 1250  | 7366 | 11250 | 134 | .91 |
| 20000 | .30 | .70 | 1800  | 8400  | 9800  | .2986 | .7014 | 1771  | 8321 | 9771  | 1800  | 8263 | 9800  | 137 | .94 |
| 20000 | .35 | .65 | 2450  | 9100  | 8450  | .3490 | .6510 | 2419  | 9025 | 8419  | 2450  | 8962 | 8450  | 138 | .96 |
| 20000 | .40 | .60 | 3200  | 9600  | 7200  | .3993 | .6007 | 3167  | 9528 | 7167  | 3200  | 9462 | 7200  | 138 | .97 |
| 20000 | .45 | .55 | 4050  | 9900  | 6050  | .4497 | .5503 | 4016  | 9830 | 6016  | 4050  | 9761 | 6050  | 139 | .97 |
| 20000 | .50 | .50 | 5000  | 10000 | 5000  | .5000 | .5000 | 4965  | 9931 | 4965  | 5000  | 9861 | 5000  | 139 | .97 |
| 20000 | .55 | .45 | 6050  | 9900  | 4050  | .5503 | .4497 | 6016  | 9830 | 4016  | 6050  | 9761 | 4050  | 139 | .97 |
| 20000 | .60 | .40 | 7200  | 9600  | 3200  | .6007 | .3993 | 7167  | 9528 | 3167  | 7200  | 9462 | 3200  | 138 | .97 |
| 20000 | .65 | .35 | 8450  | 9100  | 2450  | .6510 | .3490 | 8419  | 9025 | 2419  | 8450  | 8962 | 2450  | 138 | .96 |
| 20000 | .70 | .30 | 9800  | 8400  | 1800  | .7014 | .2986 | 9771  | 8321 | 1771  | 9800  | 8263 | 1800  | 137 | .94 |
| 20000 | .75 | .25 | 11250 | 7500  | 1250  | .7517 | .2483 | 11225 | 7416 | 1225  | 11250 | 7366 | 1250  | 134 | .91 |
| 20000 | .80 | .20 | 12800 | 6400  | 800   | .8020 | .1980 | 12779 | 6312 | 779   | 12800 | 6271 | 800   | 129 | .85 |
| 20000 | .85 | .15 | 14450 | 5100  | 450   | .8521 | .1479 | 14435 | 5010 | 435   | 14450 | 4979 | 450   | 121 | .74 |
| 20000 | .90 | .10 | 16200 | 3600  | 200   | .9021 | .0979 | 16191 | 3512 | 191   | 16200 | 3494 | 200   | 106 | .58 |
| 20000 | .95 | .05 | 18050 | 1900  | 50    | .9518 | .0482 | 18046 | 1826 | 46    | 18050 | 1819 | 50    | 81  | .34 |
| 21000 | .05 | .95 | 53    | 1995  | 18953 | .0482 | .9518 | 49    | 1919 | 18949 | 53    | 1912 | 18953 | 83  | .34 |
| 21000 | .10 | .90 | 210   | 3780  | 17010 | .0979 | .9021 | 200   | 3690 | 17000 | 210   | 3671 | 17010 | 109 | .58 |
| 21000 | .15 | .85 | 473   | 5355  | 15173 | .1479 | .8521 | 457   | 5263 | 15157 | 473   | 5231 | 15173 | 124 | .74 |
| 21000 | .20 | .80 | 840   | 6720  | 13440 | .1981 | .8019 | 819   | 6630 | 13419 | 840   | 6588 | 13440 | 132 | .85 |
| 21000 | .25 | .75 | 1313  | 7875  | 11813 | .2484 | .7516 | 1287  | 7789 | 11787 | 1313  | 7737 | 11813 | 138 | .91 |
| 21000 | .30 | .70 | 1890  | 8820  | 10290 | .2987 | .7013 | 1861  | 8739 | 10261 | 1890  | 8680 | 10290 | 140 | .94 |
| 21000 | .35 | .65 | 2573  | 9555  | 8873  | .3490 | .6510 | 2540  | 9478 | 8840  | 2573  | 9414 | 8873  | 141 | .96 |

|       |     |     |       |       |       |       |       |       |       |       |       |       |       |     |     |
|-------|-----|-----|-------|-------|-------|-------|-------|-------|-------|-------|-------|-------|-------|-----|-----|
| 21000 | .40 | .60 | 3360  | 10080 | 7560  | .3993 | .6007 | 3326  | 10006 | 7526  | 3360  | 9938  | 7560  | 142 | .97 |
| 21000 | .45 | .55 | 4253  | 10395 | 6353  | .4497 | .5503 | 4217  | 10323 | 6317  | 4253  | 10253 | 6353  | 142 | .97 |
| 21000 | .50 | .50 | 5250  | 10500 | 5250  | .5000 | .5000 | 5214  | 10429 | 5214  | 5250  | 10358 | 5250  | 142 | .97 |
| 21000 | .55 | .45 | 6353  | 10395 | 4253  | .5503 | .4497 | 6317  | 10323 | 4217  | 6353  | 10253 | 4253  | 142 | .97 |
| 21000 | .60 | .40 | 7560  | 10080 | 3360  | .6007 | .3993 | 7526  | 10006 | 3326  | 7560  | 9938  | 3360  | 142 | .97 |
| 21000 | .65 | .35 | 8873  | 9555  | 2573  | .6510 | .3490 | 8840  | 9478  | 2540  | 8873  | 9414  | 2573  | 141 | .96 |
| 21000 | .70 | .30 | 10290 | 8820  | 1890  | .7013 | .2987 | 10261 | 8739  | 1861  | 10290 | 8680  | 1890  | 140 | .94 |
| 21000 | .75 | .25 | 11813 | 7875  | 1313  | .7516 | .2484 | 11787 | 7789  | 1287  | 11813 | 7737  | 1313  | 138 | .91 |
| 21000 | .80 | .20 | 13440 | 6720  | 840   | .8019 | .1981 | 13419 | 6630  | 819   | 13440 | 6588  | 840   | 132 | .85 |
| 21000 | .85 | .15 | 15173 | 5355  | 473   | .8521 | .1479 | 15157 | 5263  | 457   | 15173 | 5231  | 473   | 124 | .74 |
| 21000 | .90 | .10 | 17010 | 3780  | 210   | .9021 | .0979 | 17000 | 3690  | 200   | 17010 | 3671  | 210   | 109 | .58 |
| 21000 | .95 | .05 | 18953 | 1995  | 53    | .9518 | .0482 | 18949 | 1919  | 49    | 18953 | 1912  | 53    | 83  | .34 |
| 22000 | .05 | .95 | 55    | 2090  | 19855 | .0482 | .9518 | 51    | 2013  | 19851 | 55    | 2005  | 19855 | 85  | .34 |
| 22000 | .10 | .90 | 220   | 3960  | 17820 | .0980 | .9020 | 210   | 3868  | 17810 | 220   | 3848  | 17820 | 112 | .58 |
| 22000 | .15 | .85 | 495   | 5610  | 15895 | .1480 | .8520 | 479   | 5515  | 15879 | 495   | 5483  | 15895 | 127 | .74 |
| 22000 | .20 | .80 | 880   | 7040  | 14080 | .1981 | .8019 | 858   | 6948  | 14058 | 880   | 6904  | 14080 | 136 | .85 |
| 22000 | .25 | .75 | 1375  | 8250  | 12375 | .2484 | .7516 | 1349  | 8162  | 12349 | 1375  | 8109  | 12375 | 141 | .91 |
| 22000 | .30 | .70 | 1980  | 9240  | 10780 | .2987 | .7013 | 1950  | 9157  | 10750 | 1980  | 9097  | 10780 | 143 | .94 |
| 22000 | .35 | .65 | 2695  | 10010 | 9295  | .3490 | .6510 | 2662  | 9931  | 9262  | 2695  | 9865  | 9295  | 145 | .96 |
| 22000 | .40 | .60 | 3520  | 10560 | 7920  | .3993 | .6007 | 3485  | 10484 | 7885  | 3520  | 10415 | 7920  | 145 | .97 |
| 22000 | .45 | .55 | 4455  | 10890 | 6655  | .4497 | .5503 | 4419  | 10817 | 6619  | 4455  | 10745 | 6655  | 145 | .97 |
| 22000 | .50 | .50 | 5500  | 11000 | 5500  | .5000 | .5000 | 5464  | 10927 | 5464  | 5500  | 10855 | 5500  | 145 | .97 |
| 22000 | .55 | .45 | 6655  | 10890 | 4455  | .5503 | .4497 | 6619  | 10817 | 4419  | 6655  | 10745 | 4455  | 145 | .97 |
| 22000 | .60 | .40 | 7920  | 10560 | 3520  | .6007 | .3993 | 7885  | 10484 | 3485  | 7920  | 10415 | 3520  | 145 | .97 |
| 22000 | .65 | .35 | 9295  | 10010 | 2695  | .6510 | .3490 | 9262  | 9931  | 2662  | 9295  | 9865  | 2695  | 145 | .96 |
| 22000 | .70 | .30 | 10780 | 9240  | 1980  | .7013 | .2987 | 10750 | 9157  | 1950  | 10780 | 9097  | 1980  | 143 | .94 |
| 22000 | .75 | .25 | 12375 | 8250  | 1375  | .7516 | .2484 | 12349 | 8162  | 1349  | 12375 | 8109  | 1375  | 141 | .91 |
| 22000 | .80 | .20 | 14080 | 7040  | 880   | .8019 | .1981 | 14058 | 6948  | 858   | 14080 | 6904  | 880   | 136 | .85 |
| 22000 | .85 | .15 | 15895 | 5610  | 495   | .8520 | .1480 | 15879 | 5515  | 479   | 15895 | 5483  | 495   | 127 | .74 |
| 22000 | .90 | .10 | 17820 | 3960  | 220   | .9020 | .0980 | 17810 | 3868  | 210   | 17820 | 3848  | 220   | 112 | .58 |
| 22000 | .95 | .05 | 19855 | 2090  | 55    | .9518 | .0482 | 19851 | 2013  | 51    | 19855 | 2005  | 55    | 85  | .34 |
| 23000 | .05 | .95 | 58    | 2185  | 20758 | .0483 | .9517 | 53    | 2106  | 20753 | 58    | 2098  | 20758 | 87  | .34 |
| 23000 | .10 | .90 | 230   | 4140  | 18630 | .0980 | .9020 | 220   | 4046  | 18620 | 230   | 4026  | 18630 | 114 | .58 |

|       |     |     |       |       |       |       |       |       |       |       |       |       |       |     |     |
|-------|-----|-----|-------|-------|-------|-------|-------|-------|-------|-------|-------|-------|-------|-----|-----|
| 23000 | .15 | .85 | 518   | 5865  | 16618 | .1480 | .8520 | 501   | 5768  | 16601 | 518   | 5735  | 16618 | 130 | .74 |
| 23000 | .20 | .80 | 920   | 7360  | 14720 | .1982 | .8018 | 898   | 7266  | 14698 | 920   | 7221  | 14720 | 139 | .85 |
| 23000 | .25 | .75 | 1438  | 8625  | 12938 | .2484 | .7516 | 1411  | 8535  | 12911 | 1438  | 8481  | 12938 | 144 | .91 |
| 23000 | .30 | .70 | 2070  | 9660  | 11270 | .2987 | .7013 | 2039  | 9575  | 11239 | 2070  | 9513  | 11270 | 147 | .94 |
| 23000 | .35 | .65 | 2818  | 10465 | 9718  | .3490 | .6510 | 2784  | 10384 | 9684  | 2818  | 10317 | 9718  | 148 | .96 |
| 23000 | .40 | .60 | 3680  | 11040 | 8280  | .3994 | .6006 | 3644  | 10963 | 8244  | 3680  | 10891 | 8280  | 149 | .97 |
| 23000 | .45 | .55 | 4658  | 11385 | 6958  | .4497 | .5503 | 4621  | 11310 | 6921  | 4658  | 11236 | 6958  | 149 | .97 |
| 23000 | .50 | .50 | 5750  | 11500 | 5750  | .5000 | .5000 | 5713  | 11426 | 5713  | 5750  | 11351 | 5750  | 149 | .97 |
| 23000 | .55 | .45 | 6958  | 11385 | 4658  | .5503 | .4497 | 6921  | 11310 | 4621  | 6958  | 11236 | 4658  | 149 | .97 |
| 23000 | .60 | .40 | 8280  | 11040 | 3680  | .6006 | .3994 | 8244  | 10963 | 3644  | 8280  | 10891 | 3680  | 149 | .97 |
| 23000 | .65 | .35 | 9718  | 10465 | 2818  | .6510 | .3490 | 9684  | 10384 | 2784  | 9718  | 10317 | 2818  | 148 | .96 |
| 23000 | .70 | .30 | 11270 | 9660  | 2070  | .7013 | .2987 | 11239 | 9575  | 2039  | 11270 | 9513  | 2070  | 147 | .94 |
| 23000 | .75 | .25 | 12938 | 8625  | 1438  | .7516 | .2484 | 12911 | 8535  | 1411  | 12938 | 8481  | 1438  | 144 | .91 |
| 23000 | .80 | .20 | 14720 | 7360  | 920   | .8018 | .1982 | 14698 | 7266  | 898   | 14720 | 7221  | 920   | 139 | .85 |
| 23000 | .85 | .15 | 16618 | 5865  | 518   | .8520 | .1480 | 16601 | 5768  | 501   | 16618 | 5735  | 518   | 130 | .74 |
| 23000 | .90 | .10 | 18630 | 4140  | 230   | .9020 | .0980 | 18620 | 4046  | 220   | 18630 | 4026  | 230   | 114 | .58 |
| 23000 | .95 | .05 | 20758 | 2185  | 58    | .9517 | .0483 | 20753 | 2106  | 53    | 20758 | 2098  | 58    | 87  | .34 |
| 24000 | .05 | .95 | 60    | 2280  | 21660 | .0483 | .9517 | 56    | 2199  | 21656 | 60    | 2191  | 21660 | 89  | .34 |
| 24000 | .10 | .90 | 240   | 4320  | 19440 | .0980 | .9020 | 230   | 4224  | 19430 | 240   | 4203  | 19440 | 117 | .58 |
| 24000 | .15 | .85 | 540   | 6120  | 17340 | .1481 | .8519 | 523   | 6021  | 17323 | 540   | 5988  | 17340 | 132 | .74 |
| 24000 | .20 | .80 | 960   | 7680  | 15360 | .1982 | .8018 | 937   | 7584  | 15337 | 960   | 7538  | 15360 | 142 | .85 |
| 24000 | .25 | .75 | 1500  | 9000  | 13500 | .2485 | .7515 | 1472  | 8908  | 13472 | 1500  | 8853  | 13500 | 147 | .91 |
| 24000 | .30 | .70 | 2160  | 10080 | 11760 | .2987 | .7013 | 2129  | 9993  | 11729 | 2160  | 9930  | 11760 | 150 | .94 |
| 24000 | .35 | .65 | 2940  | 10920 | 10140 | .3490 | .6510 | 2906  | 10838 | 10106 | 2940  | 10769 | 10140 | 151 | .96 |
| 24000 | .40 | .60 | 3840  | 11520 | 8640  | .3994 | .6006 | 3804  | 11441 | 8604  | 3840  | 11368 | 8640  | 152 | .97 |
| 24000 | .45 | .55 | 4860  | 11880 | 7260  | .4497 | .5503 | 4822  | 11803 | 7222  | 4860  | 11728 | 7260  | 152 | .97 |
| 24000 | .50 | .50 | 6000  | 12000 | 6000  | .5000 | .5000 | 5962  | 11924 | 5962  | 6000  | 11848 | 6000  | 152 | .97 |
| 24000 | .55 | .45 | 7260  | 11880 | 4860  | .5503 | .4497 | 7222  | 11803 | 4822  | 7260  | 11728 | 4860  | 152 | .97 |
| 24000 | .60 | .40 | 8640  | 11520 | 3840  | .6006 | .3994 | 8604  | 11441 | 3804  | 8640  | 11368 | 3840  | 152 | .97 |
| 24000 | .65 | .35 | 10140 | 10920 | 2940  | .6510 | .3490 | 10106 | 10838 | 2906  | 10140 | 10769 | 2940  | 151 | .96 |
| 24000 | .70 | .30 | 11760 | 10080 | 2160  | .7013 | .2987 | 11729 | 9993  | 2129  | 11760 | 9930  | 2160  | 150 | .94 |
| 24000 | .75 | .25 | 13500 | 9000  | 1500  | .7515 | .2485 | 13472 | 8908  | 1472  | 13500 | 8853  | 1500  | 147 | .91 |
| 24000 | .80 | .20 | 15360 | 7680  | 960   | .8018 | .1982 | 15337 | 7584  | 937   | 15360 | 7538  | 960   | 142 | .85 |

|       |     |     |       |       |       |       |       |       |       |       |       |       |       |     |     |
|-------|-----|-----|-------|-------|-------|-------|-------|-------|-------|-------|-------|-------|-------|-----|-----|
| 24000 | .85 | .15 | 17340 | 6120  | 540   | .8519 | .1481 | 17323 | 6021  | 523   | 17340 | 5988  | 540   | 132 | .74 |
| 24000 | .90 | .10 | 19440 | 4320  | 240   | .9020 | .0980 | 19430 | 4224  | 230   | 19440 | 4203  | 240   | 117 | .58 |
| 24000 | .95 | .05 | 21660 | 2280  | 60    | .9517 | .0483 | 21656 | 2199  | 56    | 21660 | 2191  | 60    | 89  | .34 |
| 25000 | .05 | .95 | 63    | 2375  | 22563 | .0484 | .9516 | 58    | 2293  | 22558 | 63    | 2284  | 22563 | 91  | .34 |
| 25000 | .10 | .90 | 250   | 4500  | 20250 | .0981 | .9019 | 239   | 4402  | 20239 | 250   | 4381  | 20250 | 119 | .58 |
| 25000 | .15 | .85 | 563   | 6375  | 18063 | .1481 | .8519 | 545   | 6274  | 18045 | 563   | 6240  | 18063 | 135 | .74 |
| 25000 | .20 | .80 | 1000  | 8000  | 16000 | .1983 | .8017 | 977   | 7902  | 15977 | 1000  | 7855  | 16000 | 145 | .85 |
| 25000 | .25 | .75 | 1563  | 9375  | 14063 | .2485 | .7515 | 1534  | 9281  | 14034 | 1563  | 9225  | 14063 | 150 | .91 |
| 25000 | .30 | .70 | 2250  | 10500 | 12250 | .2988 | .7012 | 2218  | 10411 | 12218 | 2250  | 10347 | 12250 | 153 | .94 |
| 25000 | .35 | .65 | 3063  | 11375 | 10563 | .3491 | .6509 | 3027  | 11291 | 10527 | 3063  | 11221 | 10563 | 154 | .96 |
| 25000 | .40 | .60 | 4000  | 12000 | 9000  | .3994 | .6006 | 3963  | 11919 | 8963  | 4000  | 11845 | 9000  | 155 | .97 |
| 25000 | .45 | .55 | 5063  | 12375 | 7563  | .4497 | .5503 | 5024  | 12297 | 7524  | 5063  | 12220 | 7563  | 155 | .97 |
| 25000 | .50 | .50 | 6250  | 12500 | 6250  | .5000 | .5000 | 6211  | 12423 | 6211  | 6250  | 12345 | 6250  | 155 | .97 |
| 25000 | .55 | .45 | 7563  | 12375 | 5063  | .5503 | .4497 | 7524  | 12297 | 5024  | 7563  | 12220 | 5063  | 155 | .97 |
| 25000 | .60 | .40 | 9000  | 12000 | 4000  | .6006 | .3994 | 8963  | 11919 | 3963  | 9000  | 11845 | 4000  | 155 | .97 |
| 25000 | .65 | .35 | 10563 | 11375 | 3063  | .6509 | .3491 | 10527 | 11291 | 3027  | 10563 | 11221 | 3063  | 154 | .96 |
| 25000 | .70 | .30 | 12250 | 10500 | 2250  | .7012 | .2988 | 12218 | 10411 | 2218  | 12250 | 10347 | 2250  | 153 | .94 |
| 25000 | .75 | .25 | 14063 | 9375  | 1563  | .7515 | .2485 | 14034 | 9281  | 1534  | 14063 | 9225  | 1563  | 150 | .91 |
| 25000 | .80 | .20 | 16000 | 8000  | 1000  | .8017 | .1983 | 15977 | 7902  | 977   | 16000 | 7855  | 1000  | 145 | .85 |
| 25000 | .85 | .15 | 18063 | 6375  | 563   | .8519 | .1481 | 18045 | 6274  | 545   | 18063 | 6240  | 563   | 135 | .74 |
| 25000 | .90 | .10 | 20250 | 4500  | 250   | .9019 | .0981 | 20239 | 4402  | 239   | 20250 | 4381  | 250   | 119 | .58 |
| 25000 | .95 | .05 | 22563 | 2375  | 63    | .9516 | .0484 | 22558 | 2293  | 58    | 22563 | 2284  | 63    | 91  | .34 |
| 26000 | .05 | .95 | 65    | 2470  | 23465 | .0484 | .9516 | 61    | 2386  | 23461 | 65    | 2377  | 23465 | 93  | .34 |
| 26000 | .10 | .90 | 260   | 4680  | 21060 | .0981 | .9019 | 249   | 4580  | 21049 | 260   | 4559  | 21060 | 121 | .58 |
| 26000 | .15 | .85 | 585   | 6630  | 18785 | .1481 | .8519 | 568   | 6527  | 18768 | 585   | 6492  | 18785 | 138 | .74 |
| 26000 | .20 | .80 | 1040  | 8320  | 16640 | .1983 | .8017 | 1016  | 8220  | 16616 | 1040  | 8173  | 16640 | 147 | .85 |
| 26000 | .25 | .75 | 1625  | 9750  | 14625 | .2485 | .7515 | 1596  | 9654  | 14596 | 1625  | 9597  | 14625 | 153 | .91 |
| 26000 | .30 | .70 | 2340  | 10920 | 12740 | .2988 | .7012 | 2307  | 10829 | 12707 | 2340  | 10764 | 12740 | 156 | .94 |
| 26000 | .35 | .65 | 3185  | 11830 | 10985 | .3491 | .6509 | 3149  | 11744 | 10949 | 3185  | 11673 | 10985 | 157 | .96 |
| 26000 | .40 | .60 | 4160  | 12480 | 9360  | .3994 | .6006 | 4122  | 12398 | 9322  | 4160  | 12322 | 9360  | 158 | .97 |
| 26000 | .45 | .55 | 5265  | 12870 | 7865  | .4497 | .5503 | 5226  | 12790 | 7826  | 5265  | 12712 | 7865  | 158 | .97 |
| 26000 | .50 | .50 | 6500  | 13000 | 6500  | .5000 | .5000 | 6460  | 12921 | 6460  | 6500  | 12842 | 6500  | 158 | .97 |
| 26000 | .55 | .45 | 7865  | 12870 | 5265  | .5503 | .4497 | 7826  | 12790 | 5226  | 7865  | 12712 | 5265  | 158 | .97 |

|       |     |     |       |       |       |       |       |       |       |       |       |       |       |     |     |
|-------|-----|-----|-------|-------|-------|-------|-------|-------|-------|-------|-------|-------|-------|-----|-----|
| 26000 | .60 | .40 | 9360  | 12480 | 4160  | .6006 | .3994 | 9322  | 12398 | 4122  | 9360  | 12322 | 4160  | 158 | .97 |
| 26000 | .65 | .35 | 10985 | 11830 | 3185  | .6509 | .3491 | 10949 | 11744 | 3149  | 10985 | 11673 | 3185  | 157 | .96 |
| 26000 | .70 | .30 | 12740 | 10920 | 2340  | .7012 | .2988 | 12707 | 10829 | 2307  | 12740 | 10764 | 2340  | 156 | .94 |
| 26000 | .75 | .25 | 14625 | 9750  | 1625  | .7515 | .2485 | 14596 | 9654  | 1596  | 14625 | 9597  | 1625  | 153 | .91 |
| 26000 | .80 | .20 | 16640 | 8320  | 1040  | .8017 | .1983 | 16616 | 8220  | 1016  | 16640 | 8173  | 1040  | 147 | .85 |
| 26000 | .85 | .15 | 18785 | 6630  | 585   | .8519 | .1481 | 18768 | 6527  | 568   | 18785 | 6492  | 585   | 138 | .74 |
| 26000 | .90 | .10 | 21060 | 4680  | 260   | .9019 | .0981 | 21049 | 4580  | 249   | 21060 | 4559  | 260   | 121 | .58 |
| 26000 | .95 | .05 | 23465 | 2470  | 65    | .9516 | .0484 | 23461 | 2386  | 61    | 23465 | 2377  | 65    | 93  | .34 |
| 27000 | .05 | .95 | 68    | 2565  | 24368 | .0484 | .9516 | 63    | 2479  | 24363 | 68    | 2471  | 24368 | 94  | .34 |
| 27000 | .10 | .90 | 270   | 4860  | 21870 | .0982 | .9018 | 259   | 4758  | 21859 | 270   | 4736  | 21870 | 124 | .58 |
| 27000 | .15 | .85 | 608   | 6885  | 19508 | .1482 | .8518 | 590   | 6780  | 19490 | 608   | 6745  | 19508 | 140 | .74 |
| 27000 | .20 | .80 | 1080  | 8640  | 17280 | .1983 | .8017 | 1056  | 8538  | 17256 | 1080  | 8490  | 17280 | 150 | .85 |
| 27000 | .25 | .75 | 1688  | 10125 | 15188 | .2485 | .7515 | 1658  | 10027 | 15158 | 1688  | 9969  | 15188 | 156 | .91 |
| 27000 | .30 | .70 | 2430  | 11340 | 13230 | .2988 | .7012 | 2397  | 11248 | 13197 | 2430  | 11181 | 13230 | 159 | .94 |
| 27000 | .35 | .65 | 3308  | 12285 | 11408 | .3491 | .6509 | 3271  | 12198 | 11371 | 3308  | 12125 | 11408 | 160 | .96 |
| 27000 | .40 | .60 | 4320  | 12960 | 9720  | .3994 | .6006 | 4281  | 12876 | 9681  | 4320  | 12799 | 9720  | 161 | .97 |
| 27000 | .45 | .55 | 5468  | 13365 | 8168  | .4497 | .5503 | 5428  | 13284 | 8128  | 5468  | 13204 | 8168  | 161 | .97 |
| 27000 | .50 | .50 | 6750  | 13500 | 6750  | .5000 | .5000 | 6710  | 13419 | 6710  | 6750  | 13339 | 6750  | 161 | .97 |
| 27000 | .55 | .45 | 8168  | 13365 | 5468  | .5503 | .4497 | 8128  | 13284 | 5428  | 8168  | 13204 | 5468  | 161 | .97 |
| 27000 | .60 | .40 | 9720  | 12960 | 4320  | .6006 | .3994 | 9681  | 12876 | 4281  | 9720  | 12799 | 4320  | 161 | .97 |
| 27000 | .65 | .35 | 11408 | 12285 | 3308  | .6509 | .3491 | 11371 | 12198 | 3271  | 11408 | 12125 | 3308  | 160 | .96 |
| 27000 | .70 | .30 | 13230 | 11340 | 2430  | .7012 | .2988 | 13197 | 11248 | 2397  | 13230 | 11181 | 2430  | 159 | .94 |
| 27000 | .75 | .25 | 15188 | 10125 | 1688  | .7515 | .2485 | 15158 | 10027 | 1658  | 15188 | 9969  | 1688  | 156 | .91 |
| 27000 | .80 | .20 | 17280 | 8640  | 1080  | .8017 | .1983 | 17256 | 8538  | 1056  | 17280 | 8490  | 1080  | 150 | .85 |
| 27000 | .85 | .15 | 19508 | 6885  | 608   | .8518 | .1482 | 19490 | 6780  | 590   | 19508 | 6745  | 608   | 140 | .74 |
| 27000 | .90 | .10 | 21870 | 4860  | 270   | .9018 | .0982 | 21859 | 4758  | 259   | 21870 | 4736  | 270   | 124 | .58 |
| 27000 | .95 | .05 | 24368 | 2565  | 68    | .9516 | .0484 | 24363 | 2479  | 63    | 24368 | 2471  | 68    | 94  | .34 |
| 28000 | .05 | .95 | 70    | 2660  | 25270 | .0484 | .9516 | 65    | 2573  | 25265 | 70    | 2564  | 25270 | 96  | .34 |
| 28000 | .10 | .90 | 280   | 5040  | 22680 | .0982 | .9018 | 269   | 4936  | 22669 | 280   | 4914  | 22680 | 126 | .58 |
| 28000 | .15 | .85 | 630   | 7140  | 20230 | .1482 | .8518 | 612   | 7033  | 20212 | 630   | 6997  | 20230 | 143 | .74 |
| 28000 | .20 | .80 | 1120  | 8960  | 17920 | .1984 | .8016 | 1096  | 8856  | 17896 | 1120  | 8807  | 17920 | 153 | .85 |
| 28000 | .25 | .75 | 1750  | 10500 | 15750 | .2486 | .7514 | 1720  | 10401 | 15720 | 1750  | 10341 | 15750 | 159 | .91 |
| 28000 | .30 | .70 | 2520  | 11760 | 13720 | .2988 | .7012 | 2486  | 11666 | 13686 | 2520  | 11598 | 13720 | 162 | .94 |



|       |     |     |       |       |       |       |       |       |       |       |       |       |       |     |     |
|-------|-----|-----|-------|-------|-------|-------|-------|-------|-------|-------|-------|-------|-------|-----|-----|
| 28000 | .35 | .65 | 3430  | 12740 | 11830 | .3491 | .6509 | 3393  | 12651 | 11793 | 3430  | 12577 | 11830 | 163 | .96 |
| 28000 | .40 | .60 | 4480  | 13440 | 10080 | .3994 | .6006 | 4441  | 13355 | 10041 | 4480  | 13276 | 10080 | 164 | .96 |
| 28000 | .45 | .55 | 5670  | 13860 | 8470  | .4497 | .5503 | 5629  | 13777 | 8429  | 5670  | 13696 | 8470  | 164 | .97 |
| 28000 | .50 | .50 | 7000  | 14000 | 7000  | .5000 | .5000 | 6959  | 13918 | 6959  | 7000  | 13836 | 7000  | 164 | .97 |
| 28000 | .55 | .45 | 8470  | 13860 | 5670  | .5503 | .4497 | 8429  | 13777 | 5629  | 8470  | 13696 | 5670  | 164 | .97 |
| 28000 | .60 | .40 | 10080 | 13440 | 4480  | .6006 | .3994 | 10041 | 13355 | 4441  | 10080 | 13276 | 4480  | 164 | .96 |
| 28000 | .65 | .35 | 11830 | 12740 | 3430  | .6509 | .3491 | 11793 | 12651 | 3393  | 11830 | 12577 | 3430  | 163 | .96 |
| 28000 | .70 | .30 | 13720 | 11760 | 2520  | .7012 | .2988 | 13686 | 11666 | 2486  | 13720 | 11598 | 2520  | 162 | .94 |
| 28000 | .75 | .25 | 15750 | 10500 | 1750  | .7514 | .2486 | 15720 | 10401 | 1720  | 15750 | 10341 | 1750  | 159 | .91 |
| 28000 | .80 | .20 | 17920 | 8960  | 1120  | .8016 | .1984 | 17896 | 8856  | 1096  | 17920 | 8807  | 1120  | 153 | .85 |
| 28000 | .85 | .15 | 20230 | 7140  | 630   | .8518 | .1482 | 20212 | 7033  | 612   | 20230 | 6997  | 630   | 143 | .74 |
| 28000 | .90 | .10 | 22680 | 5040  | 280   | .9018 | .0982 | 22669 | 4936  | 269   | 22680 | 4914  | 280   | 126 | .58 |
| 28000 | .95 | .05 | 25270 | 2660  | 70    | .9516 | .0484 | 25265 | 2573  | 65    | 25270 | 2564  | 70    | 96  | .34 |
| 29000 | .05 | .95 | 73    | 2755  | 26173 | .0485 | .9515 | 68    | 2666  | 26168 | 73    | 2657  | 26173 | 98  | .34 |
| 29000 | .10 | .90 | 290   | 5220  | 23490 | .0982 | .9018 | 279   | 5115  | 23479 | 290   | 5092  | 23490 | 128 | .58 |
| 29000 | .15 | .85 | 653   | 7395  | 20953 | .1482 | .8518 | 634   | 7286  | 20934 | 653   | 7250  | 20953 | 145 | .74 |
| 29000 | .20 | .80 | 1160  | 9280  | 18560 | .1984 | .8016 | 1135  | 9174  | 18535 | 1160  | 9124  | 18560 | 156 | .85 |
| 29000 | .25 | .75 | 1813  | 10875 | 16313 | .2486 | .7514 | 1782  | 10774 | 16282 | 1813  | 10713 | 16313 | 162 | .91 |
| 29000 | .30 | .70 | 2610  | 12180 | 14210 | .2989 | .7011 | 2575  | 12084 | 14175 | 2610  | 12015 | 14210 | 165 | .94 |
| 29000 | .35 | .65 | 3553  | 13195 | 12253 | .3491 | .6509 | 3515  | 13104 | 12215 | 3553  | 13029 | 12253 | 166 | .96 |
| 29000 | .40 | .60 | 4640  | 13920 | 10440 | .3994 | .6006 | 4600  | 13833 | 10400 | 4640  | 13753 | 10440 | 167 | .96 |
| 29000 | .45 | .55 | 5873  | 14355 | 8773  | .4497 | .5503 | 5831  | 14271 | 8731  | 5873  | 14188 | 8773  | 167 | .97 |
| 29000 | .50 | .50 | 7250  | 14500 | 7250  | .5000 | .5000 | 7208  | 14417 | 7208  | 7250  | 14333 | 7250  | 167 | .97 |
| 29000 | .55 | .45 | 8773  | 14355 | 5873  | .5503 | .4497 | 8731  | 14271 | 5831  | 8773  | 14188 | 5873  | 167 | .97 |
| 29000 | .60 | .40 | 10440 | 13920 | 4640  | .6006 | .3994 | 10400 | 13833 | 4600  | 10440 | 13753 | 4640  | 167 | .96 |
| 29000 | .65 | .35 | 12253 | 13195 | 3553  | .6509 | .3491 | 12215 | 13104 | 3515  | 12253 | 13029 | 3553  | 166 | .96 |
| 29000 | .70 | .30 | 14210 | 12180 | 2610  | .7011 | .2989 | 14175 | 12084 | 2575  | 14210 | 12015 | 2610  | 165 | .94 |
| 29000 | .75 | .25 | 16313 | 10875 | 1813  | .7514 | .2486 | 16282 | 10774 | 1782  | 16313 | 10713 | 1813  | 162 | .91 |
| 29000 | .80 | .20 | 18560 | 9280  | 1160  | .8016 | .1984 | 18535 | 9174  | 1135  | 18560 | 9124  | 1160  | 156 | .85 |
| 29000 | .85 | .15 | 20953 | 7395  | 653   | .8518 | .1482 | 20934 | 7286  | 634   | 20953 | 7250  | 653   | 145 | .74 |
| 29000 | .90 | .10 | 23490 | 5220  | 290   | .9018 | .0982 | 23479 | 5115  | 279   | 23490 | 5092  | 290   | 128 | .58 |
| 29000 | .95 | .05 | 26173 | 2755  | 73    | .9515 | .0485 | 26168 | 2666  | 68    | 26173 | 2657  | 73    | 98  | .34 |
| 30000 | .05 | .95 | 75    | 2850  | 27075 | .0485 | .9515 | 70    | 2760  | 27070 | 75    | 2750  | 27075 | 100 | .34 |

|       |     |     |       |       |       |       |       |       |       |       |       |       |       |     |     |
|-------|-----|-----|-------|-------|-------|-------|-------|-------|-------|-------|-------|-------|-------|-----|-----|
| 30000 | .10 | .90 | 300   | 5400  | 24300 | .0983 | .9017 | 288   | 5293  | 24288 | 300   | 5270  | 24300 | 130 | .58 |
| 30000 | .15 | .85 | 675   | 7650  | 21675 | .1483 | .8517 | 656   | 7540  | 21656 | 675   | 7502  | 21675 | 148 | .74 |
| 30000 | .20 | .80 | 1200  | 9600  | 19200 | .1984 | .8016 | 1175  | 9492  | 19175 | 1200  | 9442  | 19200 | 158 | .85 |
| 30000 | .25 | .75 | 1875  | 11250 | 16875 | .2486 | .7514 | 1844  | 11147 | 16844 | 1875  | 11086 | 16875 | 164 | .91 |
| 30000 | .30 | .70 | 2700  | 12600 | 14700 | .2989 | .7011 | 2665  | 12503 | 14665 | 2700  | 12432 | 14700 | 168 | .94 |
| 30000 | .35 | .65 | 3675  | 13650 | 12675 | .3491 | .6509 | 3637  | 13558 | 12637 | 3675  | 13481 | 12675 | 169 | .96 |
| 30000 | .40 | .60 | 4800  | 14400 | 10800 | .3994 | .6006 | 4759  | 14312 | 10759 | 4800  | 14230 | 10800 | 170 | .96 |
| 30000 | .45 | .55 | 6075  | 14850 | 9075  | .4497 | .5503 | 6033  | 14764 | 9033  | 6075  | 14680 | 9075  | 170 | .97 |
| 30000 | .50 | .50 | 7500  | 15000 | 7500  | .5000 | .5000 | 7458  | 14915 | 7458  | 7500  | 14830 | 7500  | 170 | .97 |
| 30000 | .55 | .45 | 9075  | 14850 | 6075  | .5503 | .4497 | 9033  | 14764 | 6033  | 9075  | 14680 | 6075  | 170 | .97 |
| 30000 | .60 | .40 | 10800 | 14400 | 4800  | .6006 | .3994 | 10759 | 14312 | 4759  | 10800 | 14230 | 4800  | 170 | .96 |
| 30000 | .65 | .35 | 12675 | 13650 | 3675  | .6509 | .3491 | 12637 | 13558 | 3637  | 12675 | 13481 | 3675  | 169 | .96 |
| 30000 | .70 | .30 | 14700 | 12600 | 2700  | .7011 | .2989 | 14665 | 12503 | 2665  | 14700 | 12432 | 2700  | 168 | .94 |
| 30000 | .75 | .25 | 16875 | 11250 | 1875  | .7514 | .2486 | 16844 | 11147 | 1844  | 16875 | 11086 | 1875  | 164 | .91 |
| 30000 | .80 | .20 | 19200 | 9600  | 1200  | .8016 | .1984 | 19175 | 9492  | 1175  | 19200 | 9442  | 1200  | 158 | .85 |
| 30000 | .85 | .15 | 21675 | 7650  | 675   | .8517 | .1483 | 21656 | 7540  | 656   | 21675 | 7502  | 675   | 148 | .74 |
| 30000 | .90 | .10 | 24300 | 5400  | 300   | .9017 | .0983 | 24288 | 5293  | 288   | 24300 | 5270  | 300   | 130 | .58 |
| 30000 | .95 | .05 | 27075 | 2850  | 75    | .9515 | .0485 | 27070 | 2760  | 70    | 27075 | 2750  | 75    | 100 | .34 |
| 31000 | .05 | .95 | 78    | 2945  | 27978 | .0485 | .9515 | 73    | 2853  | 27973 | 78    | 2844  | 27978 | 101 | .34 |
| 31000 | .10 | .90 | 310   | 5580  | 25110 | .0983 | .9017 | 298   | 5471  | 25098 | 310   | 5447  | 25110 | 133 | .58 |
| 31000 | .15 | .85 | 698   | 7905  | 22398 | .1483 | .8517 | 678   | 7793  | 22378 | 698   | 7755  | 22398 | 150 | .74 |
| 31000 | .20 | .80 | 1240  | 9920  | 19840 | .1984 | .8016 | 1214  | 9810  | 19814 | 1240  | 9759  | 19840 | 161 | .85 |
| 31000 | .25 | .75 | 1938  | 11625 | 17438 | .2486 | .7514 | 1906  | 11520 | 17406 | 1938  | 11458 | 17438 | 167 | .91 |
| 31000 | .30 | .70 | 2790  | 13020 | 15190 | .2989 | .7011 | 2754  | 12921 | 15154 | 2790  | 12850 | 15190 | 170 | .94 |
| 31000 | .35 | .65 | 3798  | 14105 | 13098 | .3492 | .6508 | 3758  | 14011 | 13058 | 3798  | 13933 | 13098 | 172 | .96 |
| 31000 | .40 | .60 | 4960  | 14880 | 11160 | .3994 | .6006 | 4919  | 14790 | 11119 | 4960  | 14708 | 11160 | 172 | .96 |
| 31000 | .45 | .55 | 6278  | 15345 | 9378  | .4497 | .5503 | 6235  | 15258 | 9335  | 6278  | 15172 | 9378  | 173 | .97 |
| 31000 | .50 | .50 | 7750  | 15500 | 7750  | .5000 | .5000 | 7707  | 15414 | 7707  | 7750  | 15327 | 7750  | 173 | .97 |
| 31000 | .55 | .45 | 9378  | 15345 | 6278  | .5503 | .4497 | 9335  | 15258 | 6235  | 9378  | 15172 | 6278  | 173 | .97 |
| 31000 | .60 | .40 | 11160 | 14880 | 4960  | .6006 | .3994 | 11119 | 14790 | 4919  | 11160 | 14708 | 4960  | 172 | .96 |
| 31000 | .65 | .35 | 13098 | 14105 | 3798  | .6508 | .3492 | 13058 | 14011 | 3758  | 13098 | 13933 | 3798  | 172 | .96 |
| 31000 | .70 | .30 | 15190 | 13020 | 2790  | .7011 | .2989 | 15154 | 12921 | 2754  | 15190 | 12850 | 2790  | 170 | .94 |
| 31000 | .75 | .25 | 17438 | 11625 | 1938  | .7514 | .2486 | 17406 | 11520 | 1906  | 17438 | 11458 | 1938  | 167 | .91 |

|       |     |     |       |       |       |       |       |       |       |       |       |       |       |     |     |
|-------|-----|-----|-------|-------|-------|-------|-------|-------|-------|-------|-------|-------|-------|-----|-----|
| 31000 | .80 | .20 | 19840 | 9920  | 1240  | .8016 | .1984 | 19814 | 9810  | 1214  | 19840 | 9759  | 1240  | 161 | .85 |
| 31000 | .85 | .15 | 22398 | 7905  | 698   | .8517 | .1483 | 22378 | 7793  | 678   | 22398 | 7755  | 698   | 150 | .74 |
| 31000 | .90 | .10 | 25110 | 5580  | 310   | .9017 | .0983 | 25098 | 5471  | 298   | 25110 | 5447  | 310   | 133 | .58 |
| 31000 | .95 | .05 | 27978 | 2945  | 78    | .9515 | .0485 | 27973 | 2853  | 73    | 27978 | 2844  | 78    | 101 | .34 |
| 32000 | .05 | .95 | 80    | 3040  | 28880 | .0485 | .9515 | 75    | 2947  | 28875 | 80    | 2937  | 28880 | 103 | .34 |
| 32000 | .10 | .90 | 320   | 5760  | 25920 | .0983 | .9017 | 308   | 5649  | 25908 | 320   | 5625  | 25920 | 135 | .58 |
| 32000 | .15 | .85 | 720   | 8160  | 23120 | .1483 | .8517 | 701   | 8046  | 23101 | 720   | 8007  | 23120 | 153 | .74 |
| 32000 | .20 | .80 | 1280  | 10240 | 20480 | .1985 | .8015 | 1254  | 10129 | 20454 | 1280  | 10076 | 20480 | 164 | .85 |
| 32000 | .25 | .75 | 2000  | 12000 | 18000 | .2487 | .7513 | 1968  | 11894 | 17968 | 2000  | 11830 | 18000 | 170 | .91 |
| 32000 | .30 | .70 | 2880  | 13440 | 15680 | .2989 | .7011 | 2844  | 13340 | 15644 | 2880  | 13267 | 15680 | 173 | .94 |
| 32000 | .35 | .65 | 3920  | 14560 | 13520 | .3492 | .6508 | 3880  | 14465 | 13480 | 3920  | 14385 | 13520 | 175 | .96 |
| 32000 | .40 | .60 | 5120  | 15360 | 11520 | .3994 | .6006 | 5078  | 15269 | 11478 | 5120  | 15185 | 11520 | 175 | .96 |
| 32000 | .45 | .55 | 6480  | 15840 | 9680  | .4497 | .5503 | 6437  | 15751 | 9637  | 6480  | 15665 | 9680  | 175 | .97 |
| 32000 | .50 | .50 | 8000  | 16000 | 8000  | .5000 | .5000 | 7956  | 15912 | 7956  | 8000  | 15825 | 8000  | 175 | .97 |
| 32000 | .55 | .45 | 9680  | 15840 | 6480  | .5503 | .4497 | 9637  | 15751 | 6437  | 9680  | 15665 | 6480  | 175 | .97 |
| 32000 | .60 | .40 | 11520 | 15360 | 5120  | .6006 | .3994 | 11478 | 15269 | 5078  | 11520 | 15185 | 5120  | 175 | .96 |
| 32000 | .65 | .35 | 13520 | 14560 | 3920  | .6508 | .3492 | 13480 | 14465 | 3880  | 13520 | 14385 | 3920  | 175 | .96 |
| 32000 | .70 | .30 | 15680 | 13440 | 2880  | .7011 | .2989 | 15644 | 13340 | 2844  | 15680 | 13267 | 2880  | 173 | .94 |
| 32000 | .75 | .25 | 18000 | 12000 | 2000  | .7513 | .2487 | 17968 | 11894 | 1968  | 18000 | 11830 | 2000  | 170 | .91 |
| 32000 | .80 | .20 | 20480 | 10240 | 1280  | .8015 | .1985 | 20454 | 10129 | 1254  | 20480 | 10076 | 1280  | 164 | .85 |
| 32000 | .85 | .15 | 23120 | 8160  | 720   | .8517 | .1483 | 23101 | 8046  | 701   | 23120 | 8007  | 720   | 153 | .74 |
| 32000 | .90 | .10 | 25920 | 5760  | 320   | .9017 | .0983 | 25908 | 5649  | 308   | 25920 | 5625  | 320   | 135 | .58 |
| 32000 | .95 | .05 | 28880 | 3040  | 80    | .9515 | .0485 | 28875 | 2947  | 75    | 28880 | 2937  | 80    | 103 | .34 |
| 33000 | .05 | .95 | 83    | 3135  | 29783 | .0486 | .9514 | 78    | 3040  | 29778 | 83    | 3031  | 29783 | 104 | .34 |
| 33000 | .10 | .90 | 330   | 5940  | 26730 | .0983 | .9017 | 318   | 5828  | 26718 | 330   | 5803  | 26730 | 137 | .58 |
| 33000 | .15 | .85 | 743   | 8415  | 23843 | .1483 | .8517 | 723   | 8299  | 23823 | 743   | 8260  | 23843 | 155 | .74 |
| 33000 | .20 | .80 | 1320  | 10560 | 21120 | .1985 | .8015 | 1294  | 10447 | 21094 | 1320  | 10394 | 21120 | 166 | .85 |
| 33000 | .25 | .75 | 2063  | 12375 | 18563 | .2487 | .7513 | 2030  | 12267 | 18530 | 2063  | 12203 | 18563 | 172 | .91 |
| 33000 | .30 | .70 | 2970  | 13860 | 16170 | .2989 | .7011 | 2933  | 13758 | 16133 | 2970  | 13684 | 16170 | 176 | .94 |
| 33000 | .35 | .65 | 4043  | 15015 | 13943 | .3492 | .6508 | 4002  | 14918 | 13902 | 4043  | 14838 | 13943 | 177 | .96 |
| 33000 | .40 | .60 | 5280  | 15840 | 11880 | .3995 | .6005 | 5237  | 15747 | 11837 | 5280  | 15662 | 11880 | 178 | .96 |
| 33000 | .45 | .55 | 6683  | 16335 | 9983  | .4497 | .5503 | 6638  | 16245 | 9938  | 6683  | 16157 | 9983  | 178 | .97 |
| 33000 | .50 | .50 | 8250  | 16500 | 8250  | .5000 | .5000 | 8205  | 16411 | 8205  | 8250  | 16322 | 8250  | 178 | .97 |

|       |     |     |       |       |       |       |       |       |       |       |       |       |       |     |     |
|-------|-----|-----|-------|-------|-------|-------|-------|-------|-------|-------|-------|-------|-------|-----|-----|
| 33000 | .55 | .45 | 9983  | 16335 | 6683  | .5503 | .4497 | 9938  | 16245 | 6638  | 9983  | 16157 | 6683  | 178 | .97 |
| 33000 | .60 | .40 | 11880 | 15840 | 5280  | .6005 | .3995 | 11837 | 15747 | 5237  | 11880 | 15662 | 5280  | 178 | .96 |
| 33000 | .65 | .35 | 13943 | 15015 | 4043  | .6508 | .3492 | 13902 | 14918 | 4002  | 13943 | 14838 | 4043  | 177 | .96 |
| 33000 | .70 | .30 | 16170 | 13860 | 2970  | .7011 | .2989 | 16133 | 13758 | 2933  | 16170 | 13684 | 2970  | 176 | .94 |
| 33000 | .75 | .25 | 18563 | 12375 | 2063  | .7513 | .2487 | 18530 | 12267 | 2030  | 18563 | 12203 | 2063  | 172 | .91 |
| 33000 | .80 | .20 | 21120 | 10560 | 1320  | .8015 | .1985 | 21094 | 10447 | 1294  | 21120 | 10394 | 1320  | 166 | .85 |
| 33000 | .85 | .15 | 23843 | 8415  | 743   | .8517 | .1483 | 23823 | 8299  | 723   | 23843 | 8260  | 743   | 155 | .74 |
| 33000 | .90 | .10 | 26730 | 5940  | 330   | .9017 | .0983 | 26718 | 5828  | 318   | 26730 | 5803  | 330   | 137 | .58 |
| 33000 | .95 | .05 | 29783 | 3135  | 83    | .9514 | .0486 | 29778 | 3040  | 78    | 29783 | 3031  | 83    | 104 | .34 |
| 34000 | .05 | .95 | 85    | 3230  | 30685 | .0486 | .9514 | 80    | 3134  | 30680 | 85    | 3124  | 30685 | 106 | .34 |
| 34000 | .10 | .90 | 340   | 6120  | 27540 | .0984 | .9016 | 328   | 6006  | 27528 | 340   | 5981  | 27540 | 139 | .58 |
| 34000 | .15 | .85 | 765   | 8670  | 24565 | .1484 | .8516 | 745   | 8552  | 24545 | 765   | 8512  | 24565 | 158 | .74 |
| 34000 | .20 | .80 | 1360  | 10880 | 21760 | .1985 | .8015 | 1333  | 10765 | 21733 | 1360  | 10711 | 21760 | 169 | .84 |
| 34000 | .25 | .75 | 2125  | 12750 | 19125 | .2487 | .7513 | 2092  | 12641 | 19092 | 2125  | 12575 | 19125 | 175 | .91 |
| 34000 | .30 | .70 | 3060  | 14280 | 16660 | .2989 | .7011 | 3023  | 14176 | 16623 | 3060  | 14102 | 16660 | 178 | .94 |
| 34000 | .35 | .65 | 4165  | 15470 | 14365 | .3492 | .6508 | 4124  | 15372 | 14324 | 4165  | 15290 | 14365 | 180 | .96 |
| 34000 | .40 | .60 | 5440  | 16320 | 12240 | .3995 | .6005 | 5397  | 16226 | 12197 | 5440  | 16139 | 12240 | 181 | .96 |
| 34000 | .45 | .55 | 6885  | 16830 | 10285 | .4497 | .5503 | 6840  | 16739 | 10240 | 6885  | 16649 | 10285 | 181 | .97 |
| 34000 | .50 | .50 | 8500  | 17000 | 8500  | .5000 | .5000 | 8455  | 16910 | 8455  | 8500  | 16819 | 8500  | 181 | .97 |
| 34000 | .55 | .45 | 10285 | 16830 | 6885  | .5503 | .4497 | 10240 | 16739 | 6840  | 10285 | 16649 | 6885  | 181 | .97 |
| 34000 | .60 | .40 | 12240 | 16320 | 5440  | .6005 | .3995 | 12197 | 16226 | 5397  | 12240 | 16139 | 5440  | 181 | .96 |
| 34000 | .65 | .35 | 14365 | 15470 | 4165  | .6508 | .3492 | 14324 | 15372 | 4124  | 14365 | 15290 | 4165  | 180 | .96 |
| 34000 | .70 | .30 | 16660 | 14280 | 3060  | .7011 | .2989 | 16623 | 14176 | 3023  | 16660 | 14102 | 3060  | 178 | .94 |
| 34000 | .75 | .25 | 19125 | 12750 | 2125  | .7513 | .2487 | 19092 | 12641 | 2092  | 19125 | 12575 | 2125  | 175 | .91 |
| 34000 | .80 | .20 | 21760 | 10880 | 1360  | .8015 | .1985 | 21733 | 10765 | 1333  | 21760 | 10711 | 1360  | 169 | .84 |
| 34000 | .85 | .15 | 24565 | 8670  | 765   | .8516 | .1484 | 24545 | 8552  | 745   | 24565 | 8512  | 765   | 158 | .74 |
| 34000 | .90 | .10 | 27540 | 6120  | 340   | .9016 | .0984 | 27528 | 6006  | 328   | 27540 | 5981  | 340   | 139 | .58 |
| 34000 | .95 | .05 | 30685 | 3230  | 85    | .9514 | .0486 | 30680 | 3134  | 80    | 30685 | 3124  | 85    | 106 | .34 |
| 35000 | .05 | .95 | 88    | 3325  | 31588 | .0486 | .9514 | 82    | 3228  | 31582 | 88    | 3217  | 31588 | 108 | .34 |
| 35000 | .10 | .90 | 350   | 6300  | 28350 | .0984 | .9016 | 337   | 6184  | 28337 | 350   | 6159  | 28350 | 141 | .58 |
| 35000 | .15 | .85 | 788   | 8925  | 25288 | .1484 | .8516 | 767   | 8806  | 25267 | 788   | 8765  | 25288 | 160 | .74 |
| 35000 | .20 | .80 | 1400  | 11200 | 22400 | .1985 | .8015 | 1373  | 11084 | 22373 | 1400  | 11029 | 22400 | 171 | .84 |
| 35000 | .25 | .75 | 2188  | 13125 | 19688 | .2487 | .7513 | 2154  | 13014 | 19654 | 2188  | 12947 | 19688 | 178 | .91 |

|       |     |     |       |       |       |       |       |       |       |       |       |       |       |     |     |
|-------|-----|-----|-------|-------|-------|-------|-------|-------|-------|-------|-------|-------|-------|-----|-----|
| 35000 | .30 | .70 | 3150  | 14700 | 17150 | .2990 | .7010 | 3112  | 14595 | 17112 | 3150  | 14519 | 17150 | 181 | .94 |
| 35000 | .35 | .65 | 4288  | 15925 | 14788 | .3492 | .6508 | 4246  | 15825 | 14746 | 4288  | 15742 | 14788 | 183 | .96 |
| 35000 | .40 | .60 | 5600  | 16800 | 12600 | .3995 | .6005 | 5556  | 16705 | 12556 | 5600  | 16617 | 12600 | 183 | .96 |
| 35000 | .45 | .55 | 7088  | 17325 | 10588 | .4497 | .5503 | 7042  | 17232 | 10542 | 7088  | 17142 | 10588 | 183 | .97 |
| 35000 | .50 | .50 | 8750  | 17500 | 8750  | .5000 | .5000 | 8704  | 17408 | 8704  | 8750  | 17317 | 8750  | 183 | .97 |
| 35000 | .55 | .45 | 10588 | 17325 | 7088  | .5503 | .4497 | 10542 | 17232 | 7042  | 10588 | 17142 | 7088  | 183 | .97 |
| 35000 | .60 | .40 | 12600 | 16800 | 5600  | .6005 | .3995 | 12556 | 16705 | 5556  | 12600 | 16617 | 5600  | 183 | .96 |
| 35000 | .65 | .35 | 14788 | 15925 | 4288  | .6508 | .3492 | 14746 | 15825 | 4246  | 14788 | 15742 | 4288  | 183 | .96 |
| 35000 | .70 | .30 | 17150 | 14700 | 3150  | .7010 | .2990 | 17112 | 14595 | 3112  | 17150 | 14519 | 3150  | 181 | .94 |
| 35000 | .75 | .25 | 19688 | 13125 | 2188  | .7513 | .2487 | 19654 | 13014 | 2154  | 19688 | 12947 | 2188  | 178 | .91 |
| 35000 | .80 | .20 | 22400 | 11200 | 1400  | .8015 | .1985 | 22373 | 11084 | 1373  | 22400 | 11029 | 1400  | 171 | .84 |
| 35000 | .85 | .15 | 25288 | 8925  | 788   | .8516 | .1484 | 25267 | 8806  | 767   | 25288 | 8765  | 788   | 160 | .74 |
| 35000 | .90 | .10 | 28350 | 6300  | 350   | .9016 | .0984 | 28337 | 6184  | 337   | 28350 | 6159  | 350   | 141 | .58 |
| 35000 | .95 | .05 | 31588 | 3325  | 88    | .9514 | .0486 | 31582 | 3228  | 82    | 31588 | 3217  | 88    | 108 | .34 |
| 36000 | .05 | .95 | 90    | 3420  | 32490 | .0486 | .9514 | 85    | 3321  | 32485 | 90    | 3311  | 32490 | 109 | .34 |
| 36000 | .10 | .90 | 360   | 6480  | 29160 | .0984 | .9016 | 347   | 6363  | 29147 | 360   | 6337  | 29160 | 143 | .58 |
| 36000 | .15 | .85 | 810   | 9180  | 26010 | .1484 | .8516 | 789   | 9059  | 25989 | 810   | 9018  | 26010 | 162 | .74 |
| 36000 | .20 | .80 | 1440  | 11520 | 23040 | .1985 | .8015 | 1412  | 11402 | 23012 | 1440  | 11347 | 23040 | 173 | .84 |
| 36000 | .25 | .75 | 2250  | 13500 | 20250 | .2487 | .7513 | 2216  | 13387 | 20216 | 2250  | 13320 | 20250 | 180 | .91 |
| 36000 | .30 | .70 | 3240  | 15120 | 17640 | .2990 | .7010 | 3201  | 15013 | 17601 | 3240  | 14936 | 17640 | 184 | .94 |
| 36000 | .35 | .65 | 4410  | 16380 | 15210 | .3492 | .6508 | 4368  | 16279 | 15168 | 4410  | 16195 | 15210 | 185 | .96 |
| 36000 | .40 | .60 | 5760  | 17280 | 12960 | .3995 | .6005 | 5715  | 17183 | 12915 | 5760  | 17094 | 12960 | 186 | .96 |
| 36000 | .45 | .55 | 7290  | 17820 | 10890 | .4497 | .5503 | 7244  | 17726 | 10844 | 7290  | 17634 | 10890 | 186 | .97 |
| 36000 | .50 | .50 | 9000  | 18000 | 9000  | .5000 | .5000 | 8954  | 17907 | 8954  | 9000  | 17814 | 9000  | 186 | .97 |
| 36000 | .55 | .45 | 10890 | 17820 | 7290  | .5503 | .4497 | 10844 | 17726 | 7244  | 10890 | 17634 | 7290  | 186 | .97 |
| 36000 | .60 | .40 | 12960 | 17280 | 5760  | .6005 | .3995 | 12915 | 17183 | 5715  | 12960 | 17094 | 5760  | 186 | .96 |
| 36000 | .65 | .35 | 15210 | 16380 | 4410  | .6508 | .3492 | 15168 | 16279 | 4368  | 15210 | 16195 | 4410  | 185 | .96 |
| 36000 | .70 | .30 | 17640 | 15120 | 3240  | .7010 | .2990 | 17601 | 15013 | 3201  | 17640 | 14936 | 3240  | 184 | .94 |
| 36000 | .75 | .25 | 20250 | 13500 | 2250  | .7513 | .2487 | 20216 | 13387 | 2216  | 20250 | 13320 | 2250  | 180 | .91 |
| 36000 | .80 | .20 | 23040 | 11520 | 1440  | .8015 | .1985 | 23012 | 11402 | 1412  | 23040 | 11347 | 1440  | 173 | .84 |
| 36000 | .85 | .15 | 26010 | 9180  | 810   | .8516 | .1484 | 25989 | 9059  | 789   | 26010 | 9018  | 810   | 162 | .74 |
| 36000 | .90 | .10 | 29160 | 6480  | 360   | .9016 | .0984 | 29147 | 6363  | 347   | 29160 | 6337  | 360   | 143 | .58 |
| 36000 | .95 | .05 | 32490 | 3420  | 90    | .9514 | .0486 | 32485 | 3321  | 85    | 32490 | 3311  | 90    | 109 | .34 |

|       |     |     |       |       |       |       |       |       |       |       |       |       |       |     |     |
|-------|-----|-----|-------|-------|-------|-------|-------|-------|-------|-------|-------|-------|-------|-----|-----|
| 37000 | .05 | .95 | 93    | 3515  | 33393 | .0487 | .9513 | 87    | 3415  | 33387 | 93    | 3404  | 33393 | 111 | .34 |
| 37000 | .10 | .90 | 370   | 6660  | 29970 | .0984 | .9016 | 357   | 6541  | 29957 | 370   | 6515  | 29970 | 145 | .58 |
| 37000 | .15 | .85 | 833   | 9435  | 26733 | .1484 | .8516 | 812   | 9312  | 26712 | 833   | 9271  | 26733 | 164 | .74 |
| 37000 | .20 | .80 | 1480  | 11840 | 23680 | .1986 | .8014 | 1452  | 11720 | 23652 | 1480  | 11664 | 23680 | 176 | .84 |
| 37000 | .25 | .75 | 2313  | 13875 | 20813 | .2488 | .7512 | 2278  | 13761 | 20778 | 2313  | 13692 | 20813 | 183 | .91 |
| 37000 | .30 | .70 | 3330  | 15540 | 18130 | .2990 | .7010 | 3291  | 15432 | 18091 | 3330  | 15354 | 18130 | 186 | .94 |
| 37000 | .35 | .65 | 4533  | 16835 | 15633 | .3492 | .6508 | 4490  | 16733 | 15590 | 4533  | 16647 | 15633 | 188 | .96 |
| 37000 | .40 | .60 | 5920  | 17760 | 13320 | .3995 | .6005 | 5875  | 17662 | 13275 | 5920  | 17572 | 13320 | 188 | .96 |
| 37000 | .45 | .55 | 7493  | 18315 | 11193 | .4497 | .5503 | 7446  | 18220 | 11146 | 7493  | 18127 | 11193 | 188 | .97 |
| 37000 | .50 | .50 | 9250  | 18500 | 9250  | .5000 | .5000 | 9203  | 18406 | 9203  | 9250  | 18311 | 9250  | 189 | .97 |
| 37000 | .55 | .45 | 11193 | 18315 | 7493  | .5503 | .4497 | 11146 | 18220 | 7446  | 11193 | 18127 | 7493  | 188 | .97 |
| 37000 | .60 | .40 | 13320 | 17760 | 5920  | .6005 | .3995 | 13275 | 17662 | 5875  | 13320 | 17572 | 5920  | 188 | .96 |
| 37000 | .65 | .35 | 15633 | 16835 | 4533  | .6508 | .3492 | 15590 | 16733 | 4490  | 15633 | 16647 | 4533  | 188 | .96 |
| 37000 | .70 | .30 | 18130 | 15540 | 3330  | .7010 | .2990 | 18091 | 15432 | 3291  | 18130 | 15354 | 3330  | 186 | .94 |
| 37000 | .75 | .25 | 20813 | 13875 | 2313  | .7512 | .2488 | 20778 | 13761 | 2278  | 20813 | 13692 | 2313  | 183 | .91 |
| 37000 | .80 | .20 | 23680 | 11840 | 1480  | .8014 | .1986 | 23652 | 11720 | 1452  | 23680 | 11664 | 1480  | 176 | .84 |
| 37000 | .85 | .15 | 26733 | 9435  | 833   | .8516 | .1484 | 26712 | 9312  | 812   | 26733 | 9271  | 833   | 164 | .74 |
| 37000 | .90 | .10 | 29970 | 6660  | 370   | .9016 | .0984 | 29957 | 6541  | 357   | 29970 | 6515  | 370   | 145 | .58 |
| 37000 | .95 | .05 | 33393 | 3515  | 93    | .9513 | .0487 | 33387 | 3415  | 87    | 33393 | 3404  | 93    | 111 | .34 |
| 38000 | .05 | .95 | 95    | 3610  | 34295 | .0487 | .9513 | 90    | 3508  | 34290 | 95    | 3498  | 34295 | 112 | .34 |
| 38000 | .10 | .90 | 380   | 6840  | 30780 | .0984 | .9016 | 367   | 6719  | 30767 | 380   | 6693  | 30780 | 147 | .58 |
| 38000 | .15 | .85 | 855   | 9690  | 27455 | .1485 | .8515 | 834   | 9566  | 27434 | 855   | 9523  | 27455 | 167 | .74 |
| 38000 | .20 | .80 | 1520  | 12160 | 24320 | .1986 | .8014 | 1492  | 12039 | 24292 | 1520  | 11982 | 24320 | 178 | .84 |
| 38000 | .25 | .75 | 2375  | 14250 | 21375 | .2488 | .7512 | 2340  | 14134 | 21340 | 2375  | 14065 | 21375 | 185 | .91 |
| 38000 | .30 | .70 | 3420  | 15960 | 18620 | .2990 | .7010 | 3380  | 15851 | 18580 | 3420  | 15771 | 18620 | 189 | .94 |
| 38000 | .35 | .65 | 4655  | 17290 | 16055 | .3492 | .6508 | 4612  | 17186 | 16012 | 4655  | 17100 | 16055 | 190 | .96 |
| 38000 | .40 | .60 | 6080  | 18240 | 13680 | .3995 | .6005 | 6034  | 18141 | 13634 | 6080  | 18049 | 13680 | 191 | .96 |
| 38000 | .45 | .55 | 7695  | 18810 | 11495 | .4497 | .5503 | 7648  | 18714 | 11448 | 7695  | 18619 | 11495 | 191 | .97 |
| 38000 | .50 | .50 | 9500  | 19000 | 9500  | .5000 | .5000 | 9452  | 18904 | 9452  | 9500  | 18809 | 9500  | 191 | .97 |
| 38000 | .55 | .45 | 11495 | 18810 | 7695  | .5503 | .4497 | 11448 | 18714 | 7648  | 11495 | 18619 | 7695  | 191 | .97 |
| 38000 | .60 | .40 | 13680 | 18240 | 6080  | .6005 | .3995 | 13634 | 18141 | 6034  | 13680 | 18049 | 6080  | 191 | .96 |
| 38000 | .65 | .35 | 16055 | 17290 | 4655  | .6508 | .3492 | 16012 | 17186 | 4612  | 16055 | 17100 | 4655  | 190 | .96 |
| 38000 | .70 | .30 | 18620 | 15960 | 3420  | .7010 | .2990 | 18580 | 15851 | 3380  | 18620 | 15771 | 3420  | 189 | .94 |

|       |     |     |       |       |       |       |       |       |       |       |       |       |       |     |     |
|-------|-----|-----|-------|-------|-------|-------|-------|-------|-------|-------|-------|-------|-------|-----|-----|
| 38000 | .75 | .25 | 21375 | 14250 | 2375  | .7512 | .2488 | 21340 | 14134 | 2340  | 21375 | 14065 | 2375  | 185 | .91 |
| 38000 | .80 | .20 | 24320 | 12160 | 1520  | .8014 | .1986 | 24292 | 12039 | 1492  | 24320 | 11982 | 1520  | 178 | .84 |
| 38000 | .85 | .15 | 27455 | 9690  | 855   | .8515 | .1485 | 27434 | 9566  | 834   | 27455 | 9523  | 855   | 167 | .74 |
| 38000 | .90 | .10 | 30780 | 6840  | 380   | .9016 | .0984 | 30767 | 6719  | 367   | 30780 | 6693  | 380   | 147 | .58 |
| 38000 | .95 | .05 | 34295 | 3610  | 95    | .9513 | .0487 | 34290 | 3508  | 90    | 34295 | 3498  | 95    | 112 | .34 |
| 39000 | .05 | .95 | 98    | 3705  | 35198 | .0487 | .9513 | 92    | 3602  | 35192 | 98    | 3592  | 35198 | 113 | .34 |
| 39000 | .10 | .90 | 390   | 7020  | 31590 | .0985 | .9015 | 377   | 6898  | 31577 | 390   | 6871  | 31590 | 149 | .58 |
| 39000 | .15 | .85 | 878   | 9945  | 28178 | .1485 | .8515 | 856   | 9819  | 28156 | 878   | 9776  | 28178 | 169 | .74 |
| 39000 | .20 | .80 | 1560  | 12480 | 24960 | .1986 | .8014 | 1531  | 12357 | 24931 | 1560  | 12299 | 24960 | 181 | .84 |
| 39000 | .25 | .75 | 2438  | 14625 | 21938 | .2488 | .7512 | 2402  | 14508 | 21902 | 2438  | 14438 | 21938 | 187 | .91 |
| 39000 | .30 | .70 | 3510  | 16380 | 19110 | .2990 | .7010 | 3470  | 16269 | 19070 | 3510  | 16189 | 19110 | 191 | .94 |
| 39000 | .35 | .65 | 4778  | 17745 | 16478 | .3493 | .6507 | 4734  | 17640 | 16434 | 4778  | 17552 | 16478 | 193 | .96 |
| 39000 | .40 | .60 | 6240  | 18720 | 14040 | .3995 | .6005 | 6194  | 18619 | 13994 | 6240  | 18527 | 14040 | 193 | .96 |
| 39000 | .45 | .55 | 7898  | 19305 | 11798 | .4498 | .5502 | 7850  | 19207 | 11750 | 7898  | 19111 | 11798 | 194 | .97 |
| 39000 | .50 | .50 | 9750  | 19500 | 9750  | .5000 | .5000 | 9702  | 19403 | 9702  | 9750  | 19306 | 9750  | 194 | .97 |
| 39000 | .55 | .45 | 11798 | 19305 | 7898  | .5502 | .4498 | 11750 | 19207 | 7850  | 11798 | 19111 | 7898  | 194 | .97 |
| 39000 | .60 | .40 | 14040 | 18720 | 6240  | .6005 | .3995 | 13994 | 18619 | 6194  | 14040 | 18527 | 6240  | 193 | .96 |
| 39000 | .65 | .35 | 16478 | 17745 | 4778  | .6507 | .3493 | 16434 | 17640 | 4734  | 16478 | 17552 | 4778  | 193 | .96 |
| 39000 | .70 | .30 | 19110 | 16380 | 3510  | .7010 | .2990 | 19070 | 16269 | 3470  | 19110 | 16189 | 3510  | 191 | .94 |
| 39000 | .75 | .25 | 21938 | 14625 | 2438  | .7512 | .2488 | 21902 | 14508 | 2402  | 21938 | 14438 | 2438  | 187 | .91 |
| 39000 | .80 | .20 | 24960 | 12480 | 1560  | .8014 | .1986 | 24931 | 12357 | 1531  | 24960 | 12299 | 1560  | 181 | .84 |
| 39000 | .85 | .15 | 28178 | 9945  | 878   | .8515 | .1485 | 28156 | 9819  | 856   | 28178 | 9776  | 878   | 169 | .74 |
| 39000 | .90 | .10 | 31590 | 7020  | 390   | .9015 | .0985 | 31577 | 6898  | 377   | 31590 | 6871  | 390   | 149 | .58 |
| 39000 | .95 | .05 | 35198 | 3705  | 98    | .9513 | .0487 | 35192 | 3602  | 92    | 35198 | 3592  | 98    | 113 | .34 |
| 40000 | .05 | .95 | 100   | 3800  | 36100 | .0487 | .9513 | 95    | 3696  | 36095 | 100   | 3685  | 36100 | 115 | .34 |
| 40000 | .10 | .90 | 400   | 7200  | 32400 | .0985 | .9015 | 387   | 7076  | 32387 | 400   | 7049  | 32400 | 151 | .58 |
| 40000 | .15 | .85 | 900   | 10200 | 28900 | .1485 | .8515 | 878   | 10073 | 28878 | 900   | 10029 | 28900 | 171 | .74 |
| 40000 | .20 | .80 | 1600  | 12800 | 25600 | .1986 | .8014 | 1571  | 12676 | 25571 | 1600  | 12617 | 25600 | 183 | .84 |
| 40000 | .25 | .75 | 2500  | 15000 | 22500 | .2488 | .7512 | 2464  | 14881 | 22464 | 2500  | 14810 | 22500 | 190 | .91 |
| 40000 | .30 | .70 | 3600  | 16800 | 19600 | .2990 | .7010 | 3559  | 16688 | 19559 | 3600  | 16607 | 19600 | 193 | .94 |
| 40000 | .35 | .65 | 4900  | 18200 | 16900 | .3493 | .6507 | 4856  | 18094 | 16856 | 4900  | 18005 | 16900 | 195 | .96 |
| 40000 | .40 | .60 | 6400  | 19200 | 14400 | .3995 | .6005 | 6353  | 19098 | 14353 | 6400  | 19004 | 14400 | 196 | .96 |
| 40000 | .45 | .55 | 8100  | 19800 | 12100 | .4498 | .5502 | 8051  | 19701 | 12051 | 8100  | 19604 | 12100 | 196 | .97 |

|       |     |     |       |       |       |       |       |       |       |       |       |       |       |     |     |
|-------|-----|-----|-------|-------|-------|-------|-------|-------|-------|-------|-------|-------|-------|-----|-----|
| 40000 | .50 | .50 | 10000 | 20000 | 10000 | .5000 | .5000 | 9951  | 19902 | 9951  | 10000 | 19804 | 10000 | 196 | .97 |
| 40000 | .55 | .45 | 12100 | 19800 | 8100  | .5502 | .4498 | 12051 | 19701 | 8051  | 12100 | 19604 | 8100  | 196 | .97 |
| 40000 | .60 | .40 | 14400 | 19200 | 6400  | .6005 | .3995 | 14353 | 19098 | 6353  | 14400 | 19004 | 6400  | 196 | .96 |
| 40000 | .65 | .35 | 16900 | 18200 | 4900  | .6507 | .3493 | 16856 | 18094 | 4856  | 16900 | 18005 | 4900  | 195 | .96 |
| 40000 | .70 | .30 | 19600 | 16800 | 3600  | .7010 | .2990 | 19559 | 16688 | 3559  | 19600 | 16607 | 3600  | 193 | .94 |
| 40000 | .75 | .25 | 22500 | 15000 | 2500  | .7512 | .2488 | 22464 | 14881 | 2464  | 22500 | 14810 | 2500  | 190 | .91 |
| 40000 | .80 | .20 | 25600 | 12800 | 1600  | .8014 | .1986 | 25571 | 12676 | 1571  | 25600 | 12617 | 1600  | 183 | .84 |
| 40000 | .85 | .15 | 28900 | 10200 | 900   | .8515 | .1485 | 28878 | 10073 | 878   | 28900 | 10029 | 900   | 171 | .74 |
| 40000 | .90 | .10 | 32400 | 7200  | 400   | .9015 | .0985 | 32387 | 7076  | 387   | 32400 | 7049  | 400   | 151 | .58 |
| 40000 | .95 | .05 | 36100 | 3800  | 100   | .9513 | .0487 | 36095 | 3696  | 95    | 36100 | 3685  | 100   | 115 | .34 |
| 41000 | .05 | .95 | 103   | 3895  | 37003 | .0487 | .9513 | 97    | 3790  | 36997 | 103   | 3779  | 37003 | 116 | .34 |
| 41000 | .10 | .90 | 410   | 7380  | 33210 | .0985 | .9015 | 396   | 7255  | 33196 | 410   | 7228  | 33210 | 152 | .58 |
| 41000 | .15 | .85 | 923   | 10455 | 29623 | .1485 | .8515 | 901   | 10326 | 29601 | 923   | 10282 | 29623 | 173 | .74 |
| 41000 | .20 | .80 | 1640  | 13120 | 26240 | .1986 | .8014 | 1610  | 12994 | 26210 | 1640  | 12935 | 26240 | 185 | .84 |
| 41000 | .25 | .75 | 2563  | 15375 | 23063 | .2488 | .7512 | 2527  | 15255 | 23027 | 2563  | 15183 | 23063 | 192 | .91 |
| 41000 | .30 | .70 | 3690  | 17220 | 20090 | .2990 | .7010 | 3649  | 17106 | 20049 | 3690  | 17024 | 20090 | 196 | .94 |
| 41000 | .35 | .65 | 5023  | 18655 | 17323 | .3493 | .6507 | 4978  | 18547 | 17278 | 5023  | 18457 | 17323 | 198 | .96 |
| 41000 | .40 | .60 | 6560  | 19680 | 14760 | .3995 | .6005 | 6512  | 19577 | 14712 | 6560  | 19482 | 14760 | 198 | .96 |
| 41000 | .45 | .55 | 8303  | 20295 | 12403 | .4498 | .5502 | 8253  | 20195 | 12353 | 8303  | 20097 | 12403 | 198 | .97 |
| 41000 | .50 | .50 | 10250 | 20500 | 10250 | .5000 | .5000 | 10200 | 20401 | 10200 | 10250 | 20302 | 10250 | 198 | .97 |
| 41000 | .55 | .45 | 12403 | 20295 | 8303  | .5502 | .4498 | 12353 | 20195 | 8253  | 12403 | 20097 | 8303  | 198 | .97 |
| 41000 | .60 | .40 | 14760 | 19680 | 6560  | .6005 | .3995 | 14712 | 19577 | 6512  | 14760 | 19482 | 6560  | 198 | .96 |
| 41000 | .65 | .35 | 17323 | 18655 | 5023  | .6507 | .3493 | 17278 | 18547 | 4978  | 17323 | 18457 | 5023  | 198 | .96 |
| 41000 | .70 | .30 | 20090 | 17220 | 3690  | .7010 | .2990 | 20049 | 17106 | 3649  | 20090 | 17024 | 3690  | 196 | .94 |
| 41000 | .75 | .25 | 23063 | 15375 | 2563  | .7512 | .2488 | 23027 | 15255 | 2527  | 23063 | 15183 | 2563  | 192 | .91 |
| 41000 | .80 | .20 | 26240 | 13120 | 1640  | .8014 | .1986 | 26210 | 12994 | 1610  | 26240 | 12935 | 1640  | 185 | .84 |
| 41000 | .85 | .15 | 29623 | 10455 | 923   | .8515 | .1485 | 29601 | 10326 | 901   | 29623 | 10282 | 923   | 173 | .74 |
| 41000 | .90 | .10 | 33210 | 7380  | 410   | .9015 | .0985 | 33196 | 7255  | 396   | 33210 | 7228  | 410   | 152 | .58 |
| 41000 | .95 | .05 | 37003 | 3895  | 103   | .9513 | .0487 | 36997 | 3790  | 97    | 37003 | 3779  | 103   | 116 | .34 |
| 42000 | .05 | .95 | 105   | 3990  | 37905 | .0487 | .9513 | 99    | 3883  | 37899 | 105   | 3872  | 37905 | 118 | .34 |
| 42000 | .10 | .90 | 420   | 7560  | 34020 | .0985 | .9015 | 406   | 7433  | 34006 | 420   | 7406  | 34020 | 154 | .58 |
| 42000 | .15 | .85 | 945   | 10710 | 30345 | .1485 | .8515 | 923   | 10579 | 30323 | 945   | 10535 | 30345 | 175 | .74 |
| 42000 | .20 | .80 | 1680  | 13440 | 26880 | .1987 | .8013 | 1650  | 13312 | 26850 | 1680  | 13253 | 26880 | 187 | .84 |



|       |     |     |       |       |       |       |       |       |       |       |       |       |       |     |     |
|-------|-----|-----|-------|-------|-------|-------|-------|-------|-------|-------|-------|-------|-------|-----|-----|
| 42000 | .25 | .75 | 2625  | 15750 | 23625 | .2488 | .7512 | 2589  | 15628 | 23589 | 2625  | 15556 | 23625 | 194 | .91 |
| 42000 | .30 | .70 | 3780  | 17640 | 20580 | .2991 | .7009 | 3738  | 17525 | 20538 | 3780  | 17442 | 20580 | 198 | .94 |
| 42000 | .35 | .65 | 5145  | 19110 | 17745 | .3493 | .6507 | 5100  | 19001 | 17700 | 5145  | 18910 | 17745 | 200 | .96 |
| 42000 | .40 | .60 | 6720  | 20160 | 15120 | .3995 | .6005 | 6672  | 20056 | 15072 | 6720  | 19959 | 15120 | 201 | .96 |
| 42000 | .45 | .55 | 8505  | 20790 | 12705 | .4498 | .5502 | 8455  | 20689 | 12655 | 8505  | 20589 | 12705 | 201 | .97 |
| 42000 | .50 | .50 | 10500 | 21000 | 10500 | .5000 | .5000 | 10450 | 20900 | 10450 | 10500 | 20799 | 10500 | 201 | .97 |
| 42000 | .55 | .45 | 12705 | 20790 | 8505  | .5502 | .4498 | 12655 | 20689 | 8455  | 12705 | 20589 | 8505  | 201 | .97 |
| 42000 | .60 | .40 | 15120 | 20160 | 6720  | .6005 | .3995 | 15072 | 20056 | 6672  | 15120 | 19959 | 6720  | 201 | .96 |
| 42000 | .65 | .35 | 17745 | 19110 | 5145  | .6507 | .3493 | 17700 | 19001 | 5100  | 17745 | 18910 | 5145  | 200 | .96 |
| 42000 | .70 | .30 | 20580 | 17640 | 3780  | .7009 | .2991 | 20538 | 17525 | 3738  | 20580 | 17442 | 3780  | 198 | .94 |
| 42000 | .75 | .25 | 23625 | 15750 | 2625  | .7512 | .2488 | 23589 | 15628 | 2589  | 23625 | 15556 | 2625  | 194 | .91 |
| 42000 | .80 | .20 | 26880 | 13440 | 1680  | .8013 | .1987 | 26850 | 13312 | 1650  | 26880 | 13253 | 1680  | 187 | .84 |
| 42000 | .85 | .15 | 30345 | 10710 | 945   | .8515 | .1485 | 30323 | 10579 | 923   | 30345 | 10535 | 945   | 175 | .74 |
| 42000 | .90 | .10 | 34020 | 7560  | 420   | .9015 | .0985 | 34006 | 7433  | 406   | 34020 | 7406  | 420   | 154 | .58 |
| 42000 | .95 | .05 | 37905 | 3990  | 105   | .9513 | .0487 | 37899 | 3883  | 99    | 37905 | 3872  | 105   | 118 | .34 |
| 43000 | .05 | .95 | 108   | 4085  | 38808 | .0487 | .9513 | 102   | 3977  | 38802 | 108   | 3966  | 38808 | 119 | .34 |
| 43000 | .10 | .90 | 430   | 7740  | 34830 | .0985 | .9015 | 416   | 7612  | 34816 | 430   | 7584  | 34830 | 156 | .58 |
| 43000 | .15 | .85 | 968   | 10965 | 31068 | .1486 | .8514 | 945   | 10833 | 31045 | 968   | 10788 | 31068 | 177 | .74 |
| 43000 | .20 | .80 | 1720  | 13760 | 27520 | .1987 | .8013 | 1690  | 13631 | 27490 | 1720  | 13570 | 27520 | 190 | .84 |
| 43000 | .25 | .75 | 2688  | 16125 | 24188 | .2489 | .7511 | 2651  | 16002 | 24151 | 2688  | 15928 | 24188 | 197 | .91 |
| 43000 | .30 | .70 | 3870  | 18060 | 21070 | .2991 | .7009 | 3828  | 17944 | 21028 | 3870  | 17859 | 21070 | 201 | .94 |
| 43000 | .35 | .65 | 5268  | 19565 | 18168 | .3493 | .6507 | 5221  | 19455 | 18121 | 5268  | 19363 | 18168 | 202 | .96 |
| 43000 | .40 | .60 | 6880  | 20640 | 15480 | .3995 | .6005 | 6831  | 20534 | 15431 | 6880  | 20437 | 15480 | 203 | .96 |
| 43000 | .45 | .55 | 8708  | 21285 | 13008 | .4498 | .5502 | 8657  | 21182 | 12957 | 8708  | 21082 | 13008 | 203 | .96 |
| 43000 | .50 | .50 | 10750 | 21500 | 10750 | .5000 | .5000 | 10699 | 21398 | 10699 | 10750 | 21297 | 10750 | 203 | .96 |
| 43000 | .55 | .45 | 13008 | 21285 | 8708  | .5502 | .4498 | 12957 | 21182 | 8657  | 13008 | 21082 | 8708  | 203 | .96 |
| 43000 | .60 | .40 | 15480 | 20640 | 6880  | .6005 | .3995 | 15431 | 20534 | 6831  | 15480 | 20437 | 6880  | 203 | .96 |
| 43000 | .65 | .35 | 18168 | 19565 | 5268  | .6507 | .3493 | 18121 | 19455 | 5221  | 18168 | 19363 | 5268  | 202 | .96 |
| 43000 | .70 | .30 | 21070 | 18060 | 3870  | .7009 | .2991 | 21028 | 17944 | 3828  | 21070 | 17859 | 3870  | 201 | .94 |
| 43000 | .75 | .25 | 24188 | 16125 | 2688  | .7511 | .2489 | 24151 | 16002 | 2651  | 24188 | 15928 | 2688  | 197 | .91 |
| 43000 | .80 | .20 | 27520 | 13760 | 1720  | .8013 | .1987 | 27490 | 13631 | 1690  | 27520 | 13570 | 1720  | 190 | .84 |
| 43000 | .85 | .15 | 31068 | 10965 | 968   | .8514 | .1486 | 31045 | 10833 | 945   | 31068 | 10788 | 968   | 177 | .74 |
| 43000 | .90 | .10 | 34830 | 7740  | 430   | .9015 | .0985 | 34816 | 7612  | 416   | 34830 | 7584  | 430   | 156 | .58 |

|       |     |     |       |       |       |       |       |       |       |       |       |       |       |     |     |
|-------|-----|-----|-------|-------|-------|-------|-------|-------|-------|-------|-------|-------|-------|-----|-----|
| 43000 | .95 | .05 | 38808 | 4085  | 108   | .9513 | .0487 | 38802 | 3977  | 102   | 38808 | 3966  | 108   | 119 | .34 |
| 44000 | .05 | .95 | 110   | 4180  | 39710 | .0488 | .9512 | 104   | 4071  | 39704 | 110   | 4059  | 39710 | 121 | .34 |
| 44000 | .10 | .90 | 440   | 7920  | 35640 | .0986 | .9014 | 426   | 7790  | 35626 | 440   | 7762  | 35640 | 158 | .58 |
| 44000 | .15 | .85 | 990   | 11220 | 31790 | .1486 | .8514 | 967   | 11086 | 31767 | 990   | 11041 | 31790 | 179 | .74 |
| 44000 | .20 | .80 | 1760  | 14080 | 28160 | .1987 | .8013 | 1729  | 13949 | 28129 | 1760  | 13888 | 28160 | 192 | .84 |
| 44000 | .25 | .75 | 2750  | 16500 | 24750 | .2489 | .7511 | 2713  | 16375 | 24713 | 2750  | 16301 | 24750 | 199 | .91 |
| 44000 | .30 | .70 | 3960  | 18480 | 21560 | .2991 | .7009 | 3917  | 18362 | 21517 | 3960  | 18277 | 21560 | 203 | .94 |
| 44000 | .35 | .65 | 5390  | 20020 | 18590 | .3493 | .6507 | 5343  | 19908 | 18543 | 5390  | 19815 | 18590 | 205 | .96 |
| 44000 | .40 | .60 | 7040  | 21120 | 15840 | .3995 | .6005 | 6991  | 21013 | 15791 | 7040  | 20915 | 15840 | 205 | .96 |
| 44000 | .45 | .55 | 8910  | 21780 | 13310 | .4498 | .5502 | 8859  | 21676 | 13259 | 8910  | 21574 | 13310 | 206 | .96 |
| 44000 | .50 | .50 | 11000 | 22000 | 11000 | .5000 | .5000 | 10949 | 21897 | 10949 | 11000 | 21794 | 11000 | 206 | .96 |
| 44000 | .55 | .45 | 13310 | 21780 | 8910  | .5502 | .4498 | 13259 | 21676 | 8859  | 13310 | 21574 | 8910  | 206 | .96 |
| 44000 | .60 | .40 | 15840 | 21120 | 7040  | .6005 | .3995 | 15791 | 21013 | 6991  | 15840 | 20915 | 7040  | 205 | .96 |
| 44000 | .65 | .35 | 18590 | 20020 | 5390  | .6507 | .3493 | 18543 | 19908 | 5343  | 18590 | 19815 | 5390  | 205 | .96 |
| 44000 | .70 | .30 | 21560 | 18480 | 3960  | .7009 | .2991 | 21517 | 18362 | 3917  | 21560 | 18277 | 3960  | 203 | .94 |
| 44000 | .75 | .25 | 24750 | 16500 | 2750  | .7511 | .2489 | 24713 | 16375 | 2713  | 24750 | 16301 | 2750  | 199 | .91 |
| 44000 | .80 | .20 | 28160 | 14080 | 1760  | .8013 | .1987 | 28129 | 13949 | 1729  | 28160 | 13888 | 1760  | 192 | .84 |
| 44000 | .85 | .15 | 31790 | 11220 | 990   | .8514 | .1486 | 31767 | 11086 | 967   | 31790 | 11041 | 990   | 179 | .74 |
| 44000 | .90 | .10 | 35640 | 7920  | 440   | .9014 | .0986 | 35626 | 7790  | 426   | 35640 | 7762  | 440   | 158 | .58 |
| 44000 | .95 | .05 | 39710 | 4180  | 110   | .9512 | .0488 | 39704 | 4071  | 104   | 39710 | 4059  | 110   | 121 | .34 |
| 45000 | .05 | .95 | 113   | 4275  | 40613 | .0488 | .9512 | 107   | 4165  | 40607 | 113   | 4153  | 40613 | 122 | .34 |
| 45000 | .10 | .90 | 450   | 8100  | 36450 | .0986 | .9014 | 436   | 7969  | 36436 | 450   | 7940  | 36450 | 160 | .58 |
| 45000 | .15 | .85 | 1013  | 11475 | 32513 | .1486 | .8514 | 989   | 11340 | 32489 | 1013  | 11294 | 32513 | 181 | .74 |
| 45000 | .20 | .80 | 1800  | 14400 | 28800 | .1987 | .8013 | 1769  | 14268 | 28769 | 1800  | 14206 | 28800 | 194 | .84 |
| 45000 | .25 | .75 | 2813  | 16875 | 25313 | .2489 | .7511 | 2775  | 16749 | 25275 | 2813  | 16674 | 25313 | 201 | .91 |
| 45000 | .30 | .70 | 4050  | 18900 | 22050 | .2991 | .7009 | 4007  | 18781 | 22007 | 4050  | 18695 | 22050 | 205 | .94 |
| 45000 | .35 | .65 | 5513  | 20475 | 19013 | .3493 | .6507 | 5465  | 20362 | 18965 | 5513  | 20268 | 19013 | 207 | .96 |
| 45000 | .40 | .60 | 7200  | 21600 | 16200 | .3995 | .6005 | 7150  | 21492 | 16150 | 7200  | 21392 | 16200 | 208 | .96 |
| 45000 | .45 | .55 | 9113  | 22275 | 13613 | .4498 | .5502 | 9061  | 22170 | 13561 | 9113  | 22067 | 13613 | 208 | .96 |
| 45000 | .50 | .50 | 11250 | 22500 | 11250 | .5000 | .5000 | 11198 | 22396 | 11198 | 11250 | 22292 | 11250 | 208 | .96 |
| 45000 | .55 | .45 | 13613 | 22275 | 9113  | .5502 | .4498 | 13561 | 22170 | 9061  | 13613 | 22067 | 9113  | 208 | .96 |
| 45000 | .60 | .40 | 16200 | 21600 | 7200  | .6005 | .3995 | 16150 | 21492 | 7150  | 16200 | 21392 | 7200  | 208 | .96 |
| 45000 | .65 | .35 | 19013 | 20475 | 5513  | .6507 | .3493 | 18965 | 20362 | 5465  | 19013 | 20268 | 5513  | 207 | .96 |

|       |     |     |       |       |       |       |       |       |       |       |       |       |       |     |     |
|-------|-----|-----|-------|-------|-------|-------|-------|-------|-------|-------|-------|-------|-------|-----|-----|
| 45000 | .70 | .30 | 22050 | 18900 | 4050  | .7009 | .2991 | 22007 | 18781 | 4007  | 22050 | 18695 | 4050  | 205 | .94 |
| 45000 | .75 | .25 | 25313 | 16875 | 2813  | .7511 | .2489 | 25275 | 16749 | 2775  | 25313 | 16674 | 2813  | 201 | .91 |
| 45000 | .80 | .20 | 28800 | 14400 | 1800  | .8013 | .1987 | 28769 | 14268 | 1769  | 28800 | 14206 | 1800  | 194 | .84 |
| 45000 | .85 | .15 | 32513 | 11475 | 1013  | .8514 | .1486 | 32489 | 11340 | 989   | 32513 | 11294 | 1013  | 181 | .74 |
| 45000 | .90 | .10 | 36450 | 8100  | 450   | .9014 | .0986 | 36436 | 7969  | 436   | 36450 | 7940  | 450   | 160 | .58 |
| 45000 | .95 | .05 | 40613 | 4275  | 113   | .9512 | .0488 | 40607 | 4165  | 107   | 40613 | 4153  | 113   | 122 | .34 |
| 46000 | .05 | .95 | 115   | 4370  | 41515 | .0488 | .9512 | 109   | 4258  | 41509 | 115   | 4247  | 41515 | 123 | .34 |
| 46000 | .10 | .90 | 460   | 8280  | 37260 | .0986 | .9014 | 446   | 8147  | 37246 | 460   | 8118  | 37260 | 162 | .58 |
| 46000 | .15 | .85 | 1035  | 11730 | 33235 | .1486 | .8514 | 1012  | 11593 | 33212 | 1035  | 11547 | 33235 | 183 | .74 |
| 46000 | .20 | .80 | 1840  | 14720 | 29440 | .1987 | .8013 | 1809  | 14587 | 29409 | 1840  | 14524 | 29440 | 196 | .84 |
| 46000 | .25 | .75 | 2875  | 17250 | 25875 | .2489 | .7511 | 2837  | 17123 | 25837 | 2875  | 17046 | 25875 | 204 | .91 |
| 46000 | .30 | .70 | 4140  | 19320 | 22540 | .2991 | .7009 | 4096  | 19200 | 22496 | 4140  | 19113 | 22540 | 207 | .94 |
| 46000 | .35 | .65 | 5635  | 20930 | 19435 | .3493 | .6507 | 5587  | 20816 | 19387 | 5635  | 20721 | 19435 | 209 | .96 |
| 46000 | .40 | .60 | 7360  | 22080 | 16560 | .3995 | .6005 | 7310  | 21971 | 16510 | 7360  | 21870 | 16560 | 210 | .96 |
| 46000 | .45 | .55 | 9315  | 22770 | 13915 | .4498 | .5502 | 9263  | 22664 | 13863 | 9315  | 22560 | 13915 | 210 | .96 |
| 46000 | .50 | .50 | 11500 | 23000 | 11500 | .5000 | .5000 | 11447 | 22895 | 11447 | 11500 | 22790 | 11500 | 210 | .96 |
| 46000 | .55 | .45 | 13915 | 22770 | 9315  | .5502 | .4498 | 13863 | 22664 | 9263  | 13915 | 22560 | 9315  | 210 | .96 |
| 46000 | .60 | .40 | 16560 | 22080 | 7360  | .6005 | .3995 | 16510 | 21971 | 7310  | 16560 | 21870 | 7360  | 210 | .96 |
| 46000 | .65 | .35 | 19435 | 20930 | 5635  | .6507 | .3493 | 19387 | 20816 | 5587  | 19435 | 20721 | 5635  | 209 | .96 |
| 46000 | .70 | .30 | 22540 | 19320 | 4140  | .7009 | .2991 | 22496 | 19200 | 4096  | 22540 | 19113 | 4140  | 207 | .94 |
| 46000 | .75 | .25 | 25875 | 17250 | 2875  | .7511 | .2489 | 25837 | 17123 | 2837  | 25875 | 17046 | 2875  | 204 | .91 |
| 46000 | .80 | .20 | 29440 | 14720 | 1840  | .8013 | .1987 | 29409 | 14587 | 1809  | 29440 | 14524 | 1840  | 196 | .84 |
| 46000 | .85 | .15 | 33235 | 11730 | 1035  | .8514 | .1486 | 33212 | 11593 | 1012  | 33235 | 11547 | 1035  | 183 | .74 |
| 46000 | .90 | .10 | 37260 | 8280  | 460   | .9014 | .0986 | 37246 | 8147  | 446   | 37260 | 8118  | 460   | 162 | .58 |
| 46000 | .95 | .05 | 41515 | 4370  | 115   | .9512 | .0488 | 41509 | 4258  | 109   | 41515 | 4247  | 115   | 123 | .34 |
| 47000 | .05 | .95 | 118   | 4465  | 42418 | .0488 | .9512 | 112   | 4352  | 42412 | 118   | 4340  | 42418 | 125 | .34 |
| 47000 | .10 | .90 | 470   | 8460  | 38070 | .0986 | .9014 | 455   | 8326  | 38055 | 470   | 8297  | 38070 | 163 | .58 |
| 47000 | .15 | .85 | 1058  | 11985 | 33958 | .1486 | .8514 | 1034  | 11847 | 33934 | 1058  | 11800 | 33958 | 185 | .74 |
| 47000 | .20 | .80 | 1880  | 15040 | 30080 | .1987 | .8013 | 1848  | 14905 | 30048 | 1880  | 14842 | 30080 | 198 | .84 |
| 47000 | .25 | .75 | 2938  | 17625 | 26438 | .2489 | .7511 | 2899  | 17496 | 26399 | 2938  | 17419 | 26438 | 206 | .91 |
| 47000 | .30 | .70 | 4230  | 19740 | 23030 | .2991 | .7009 | 4186  | 19618 | 22986 | 4230  | 19530 | 23030 | 210 | .94 |
| 47000 | .35 | .65 | 5758  | 21385 | 19858 | .3493 | .6507 | 5709  | 21270 | 19809 | 5758  | 21173 | 19858 | 212 | .96 |
| 47000 | .40 | .60 | 7520  | 22560 | 16920 | .3995 | .6005 | 7469  | 22450 | 16869 | 7520  | 22348 | 16920 | 212 | .96 |

|       |     |     |       |       |       |       |       |       |       |       |       |       |       |     |     |
|-------|-----|-----|-------|-------|-------|-------|-------|-------|-------|-------|-------|-------|-------|-----|-----|
| 47000 | .45 | .55 | 9518  | 23265 | 14218 | .4498 | .5502 | 9465  | 23158 | 14165 | 9518  | 23053 | 14218 | 212 | .96 |
| 47000 | .50 | .50 | 11750 | 23500 | 11750 | .5000 | .5000 | 11697 | 23394 | 11697 | 11750 | 23288 | 11750 | 212 | .96 |
| 47000 | .55 | .45 | 14218 | 23265 | 9518  | .5502 | .4498 | 14165 | 23158 | 9465  | 14218 | 23053 | 9518  | 212 | .96 |
| 47000 | .60 | .40 | 16920 | 22560 | 7520  | .6005 | .3995 | 16869 | 22450 | 7469  | 16920 | 22348 | 7520  | 212 | .96 |
| 47000 | .65 | .35 | 19858 | 21385 | 5758  | .6507 | .3493 | 19809 | 21270 | 5709  | 19858 | 21173 | 5758  | 212 | .96 |
| 47000 | .70 | .30 | 23030 | 19740 | 4230  | .7009 | .2991 | 22986 | 19618 | 4186  | 23030 | 19530 | 4230  | 210 | .94 |
| 47000 | .75 | .25 | 26438 | 17625 | 2938  | .7511 | .2489 | 26399 | 17496 | 2899  | 26438 | 17419 | 2938  | 206 | .91 |
| 47000 | .80 | .20 | 30080 | 15040 | 1880  | .8013 | .1987 | 30048 | 14905 | 1848  | 30080 | 14842 | 1880  | 198 | .84 |
| 47000 | .85 | .15 | 33958 | 11985 | 1058  | .8514 | .1486 | 33934 | 11847 | 1034  | 33958 | 11800 | 1058  | 185 | .74 |
| 47000 | .90 | .10 | 38070 | 8460  | 470   | .9014 | .0986 | 38055 | 8326  | 455   | 38070 | 8297  | 470   | 163 | .58 |
| 47000 | .95 | .05 | 42418 | 4465  | 118   | .9512 | .0488 | 42412 | 4352  | 112   | 42418 | 4340  | 118   | 125 | .34 |
| 48000 | .05 | .95 | 120   | 4560  | 43320 | .0488 | .9512 | 114   | 4446  | 43314 | 120   | 4434  | 43320 | 126 | .34 |
| 48000 | .10 | .90 | 480   | 8640  | 38880 | .0986 | .9014 | 465   | 8505  | 38865 | 480   | 8475  | 38880 | 165 | .58 |
| 48000 | .15 | .85 | 1080  | 12240 | 34680 | .1486 | .8514 | 1056  | 12100 | 34656 | 1080  | 12053 | 34680 | 187 | .74 |
| 48000 | .20 | .80 | 1920  | 15360 | 30720 | .1987 | .8013 | 1888  | 15224 | 30688 | 1920  | 15160 | 30720 | 200 | .84 |
| 48000 | .25 | .75 | 3000  | 18000 | 27000 | .2489 | .7511 | 2961  | 17870 | 26961 | 3000  | 17792 | 27000 | 208 | .91 |
| 48000 | .30 | .70 | 4320  | 20160 | 23520 | .2991 | .7009 | 4276  | 20037 | 23476 | 4320  | 19948 | 23520 | 212 | .94 |
| 48000 | .35 | .65 | 5880  | 21840 | 20280 | .3493 | .6507 | 5831  | 21723 | 20231 | 5880  | 21626 | 20280 | 214 | .96 |
| 48000 | .40 | .60 | 7680  | 23040 | 17280 | .3996 | .6004 | 7629  | 22928 | 17229 | 7680  | 22825 | 17280 | 215 | .96 |
| 48000 | .45 | .55 | 9720  | 23760 | 14520 | .4498 | .5502 | 9667  | 23652 | 14467 | 9720  | 23545 | 14520 | 215 | .96 |
| 48000 | .50 | .50 | 12000 | 24000 | 12000 | .5000 | .5000 | 11946 | 23893 | 11946 | 12000 | 23785 | 12000 | 215 | .96 |
| 48000 | .55 | .45 | 14520 | 23760 | 9720  | .5502 | .4498 | 14467 | 23652 | 9667  | 14520 | 23545 | 9720  | 215 | .96 |
| 48000 | .60 | .40 | 17280 | 23040 | 7680  | .6004 | .3996 | 17229 | 22928 | 7629  | 17280 | 22825 | 7680  | 215 | .96 |
| 48000 | .65 | .35 | 20280 | 21840 | 5880  | .6507 | .3493 | 20231 | 21723 | 5831  | 20280 | 21626 | 5880  | 214 | .96 |
| 48000 | .70 | .30 | 23520 | 20160 | 4320  | .7009 | .2991 | 23476 | 20037 | 4276  | 23520 | 19948 | 4320  | 212 | .94 |
| 48000 | .75 | .25 | 27000 | 18000 | 3000  | .7511 | .2489 | 26961 | 17870 | 2961  | 27000 | 17792 | 3000  | 208 | .91 |
| 48000 | .80 | .20 | 30720 | 15360 | 1920  | .8013 | .1987 | 30688 | 15224 | 1888  | 30720 | 15160 | 1920  | 200 | .84 |
| 48000 | .85 | .15 | 34680 | 12240 | 1080  | .8514 | .1486 | 34656 | 12100 | 1056  | 34680 | 12053 | 1080  | 187 | .74 |
| 48000 | .90 | .10 | 38880 | 8640  | 480   | .9014 | .0986 | 38865 | 8505  | 465   | 38880 | 8475  | 480   | 165 | .58 |
| 48000 | .95 | .05 | 43320 | 4560  | 120   | .9512 | .0488 | 43314 | 4446  | 114   | 43320 | 4434  | 120   | 126 | .34 |
| 49000 | .05 | .95 | 123   | 4655  | 44223 | .0488 | .9512 | 117   | 4540  | 44217 | 123   | 4528  | 44223 | 127 | .34 |
| 49000 | .10 | .90 | 490   | 8820  | 39690 | .0986 | .9014 | 475   | 8683  | 39675 | 490   | 8653  | 39690 | 167 | .58 |
| 49000 | .15 | .85 | 1103  | 12495 | 35403 | .1486 | .8514 | 1078  | 12354 | 35378 | 1103  | 12306 | 35403 | 189 | .74 |

|       |     |     |       |       |       |       |       |       |       |       |       |       |       |     |     |
|-------|-----|-----|-------|-------|-------|-------|-------|-------|-------|-------|-------|-------|-------|-----|-----|
| 49000 | .20 | .80 | 1960  | 15680 | 31360 | .1988 | .8012 | 1928  | 15542 | 31328 | 1960  | 15478 | 31360 | 202 | .84 |
| 49000 | .25 | .75 | 3063  | 18375 | 27563 | .2489 | .7511 | 3023  | 18244 | 27523 | 3063  | 18165 | 27563 | 210 | .91 |
| 49000 | .30 | .70 | 4410  | 20580 | 24010 | .2991 | .7009 | 4365  | 20456 | 23965 | 4410  | 20366 | 24010 | 214 | .94 |
| 49000 | .35 | .65 | 6003  | 22295 | 20703 | .3493 | .6507 | 5953  | 22177 | 20653 | 6003  | 22079 | 20703 | 216 | .96 |
| 49000 | .40 | .60 | 7840  | 23520 | 17640 | .3996 | .6004 | 7788  | 23407 | 17588 | 7840  | 23303 | 17640 | 217 | .96 |
| 49000 | .45 | .55 | 9923  | 24255 | 14823 | .4498 | .5502 | 9869  | 24145 | 14769 | 9923  | 24038 | 14823 | 217 | .96 |
| 49000 | .50 | .50 | 12250 | 24500 | 12250 | .5000 | .5000 | 12196 | 24392 | 12196 | 12250 | 24283 | 12250 | 217 | .96 |
| 49000 | .55 | .45 | 14823 | 24255 | 9923  | .5502 | .4498 | 14769 | 24145 | 9869  | 14823 | 24038 | 9923  | 217 | .96 |
| 49000 | .60 | .40 | 17640 | 23520 | 7840  | .6004 | .3996 | 17588 | 23407 | 7788  | 17640 | 23303 | 7840  | 217 | .96 |
| 49000 | .65 | .35 | 20703 | 22295 | 6003  | .6507 | .3493 | 20653 | 22177 | 5953  | 20703 | 22079 | 6003  | 216 | .96 |
| 49000 | .70 | .30 | 24010 | 20580 | 4410  | .7009 | .2991 | 23965 | 20456 | 4365  | 24010 | 20366 | 4410  | 214 | .94 |
| 49000 | .75 | .25 | 27563 | 18375 | 3063  | .7511 | .2489 | 27523 | 18244 | 3023  | 27563 | 18165 | 3063  | 210 | .91 |
| 49000 | .80 | .20 | 31360 | 15680 | 1960  | .8012 | .1988 | 31328 | 15542 | 1928  | 31360 | 15478 | 1960  | 202 | .84 |
| 49000 | .85 | .15 | 35403 | 12495 | 1103  | .8514 | .1486 | 35378 | 12354 | 1078  | 35403 | 12306 | 1103  | 189 | .74 |
| 49000 | .90 | .10 | 39690 | 8820  | 490   | .9014 | .0986 | 39675 | 8683  | 475   | 39690 | 8653  | 490   | 167 | .58 |
| 49000 | .95 | .05 | 44223 | 4655  | 123   | .9512 | .0488 | 44217 | 4540  | 117   | 44223 | 4528  | 123   | 127 | .34 |
| 50000 | .05 | .95 | 125   | 4750  | 45125 | .0488 | .9512 | 119   | 4634  | 45119 | 125   | 4621  | 45125 | 129 | .34 |
| 50000 | .10 | .90 | 500   | 9000  | 40500 | .0986 | .9014 | 485   | 8862  | 40485 | 500   | 8832  | 40500 | 168 | .58 |
| 50000 | .15 | .85 | 1125  | 12750 | 36125 | .1487 | .8513 | 1101  | 12608 | 36101 | 1125  | 12559 | 36125 | 191 | .74 |
| 50000 | .20 | .80 | 2000  | 16000 | 32000 | .1988 | .8012 | 1967  | 15861 | 31967 | 2000  | 15796 | 32000 | 204 | .84 |
| 50000 | .25 | .75 | 3125  | 18750 | 28125 | .2489 | .7511 | 3085  | 18617 | 28085 | 3125  | 18538 | 28125 | 212 | .91 |
| 50000 | .30 | .70 | 4500  | 21000 | 24500 | .2991 | .7009 | 4455  | 20874 | 24455 | 4500  | 20784 | 24500 | 216 | .94 |
| 50000 | .35 | .65 | 6125  | 22750 | 21125 | .3493 | .6507 | 6075  | 22631 | 21075 | 6125  | 22532 | 21125 | 218 | .96 |
| 50000 | .40 | .60 | 8000  | 24000 | 18000 | .3996 | .6004 | 7947  | 23886 | 17947 | 8000  | 23781 | 18000 | 219 | .96 |
| 50000 | .45 | .55 | 10125 | 24750 | 15125 | .4498 | .5502 | 10071 | 24639 | 15071 | 10125 | 24531 | 15125 | 219 | .96 |
| 50000 | .50 | .50 | 12500 | 25000 | 12500 | .5000 | .5000 | 12445 | 24890 | 12445 | 12500 | 24781 | 12500 | 219 | .96 |
| 50000 | .55 | .45 | 15125 | 24750 | 10125 | .5502 | .4498 | 15071 | 24639 | 10071 | 15125 | 24531 | 10125 | 219 | .96 |
| 50000 | .60 | .40 | 18000 | 24000 | 8000  | .6004 | .3996 | 17947 | 23886 | 7947  | 18000 | 23781 | 8000  | 219 | .96 |
| 50000 | .65 | .35 | 21125 | 22750 | 6125  | .6507 | .3493 | 21075 | 22631 | 6075  | 21125 | 22532 | 6125  | 218 | .96 |
| 50000 | .70 | .30 | 24500 | 21000 | 4500  | .7009 | .2991 | 24455 | 20874 | 4455  | 24500 | 20784 | 4500  | 216 | .94 |
| 50000 | .75 | .25 | 28125 | 18750 | 3125  | .7511 | .2489 | 28085 | 18617 | 3085  | 28125 | 18538 | 3125  | 212 | .91 |
| 50000 | .80 | .20 | 32000 | 16000 | 2000  | .8012 | .1988 | 31967 | 15861 | 1967  | 32000 | 15796 | 2000  | 204 | .84 |
| 50000 | .85 | .15 | 36125 | 12750 | 1125  | .8513 | .1487 | 36101 | 12608 | 1101  | 36125 | 12559 | 1125  | 191 | .74 |

|       |     |     |       |       |       |       |       |       |       |       |       |       |       |     |     |
|-------|-----|-----|-------|-------|-------|-------|-------|-------|-------|-------|-------|-------|-------|-----|-----|
| 50000 | .90 | .10 | 40500 | 9000  | 500   | .9014 | .0986 | 40485 | 8862  | 485   | 40500 | 8832  | 500   | 168 | .58 |
| 50000 | .95 | .05 | 45125 | 4750  | 125   | .9512 | .0488 | 45119 | 4634  | 119   | 45125 | 4621  | 125   | 129 | .34 |
| 51000 | .05 | .95 | 128   | 4845  | 46028 | .0489 | .9511 | 121   | 4727  | 46021 | 128   | 4715  | 46028 | 130 | .34 |
| 51000 | .10 | .90 | 510   | 9180  | 41310 | .0987 | .9013 | 495   | 9040  | 41295 | 510   | 9010  | 41310 | 170 | .58 |
| 51000 | .15 | .85 | 1148  | 13005 | 36848 | .1487 | .8513 | 1123  | 12861 | 36823 | 1148  | 12812 | 36848 | 193 | .74 |
| 51000 | .20 | .80 | 2040  | 16320 | 32640 | .1988 | .8012 | 2007  | 16179 | 32607 | 2040  | 16114 | 32640 | 206 | .84 |
| 51000 | .25 | .75 | 3188  | 19125 | 28688 | .2489 | .7511 | 3147  | 18991 | 28647 | 3188  | 18911 | 28688 | 214 | .91 |
| 51000 | .30 | .70 | 4590  | 21420 | 24990 | .2991 | .7009 | 4544  | 21293 | 24944 | 4590  | 21202 | 24990 | 218 | .94 |
| 51000 | .35 | .65 | 6248  | 23205 | 21548 | .3493 | .6507 | 6197  | 23085 | 21497 | 6248  | 22985 | 21548 | 220 | .96 |
| 51000 | .40 | .60 | 8160  | 24480 | 18360 | .3996 | .6004 | 8107  | 24365 | 18307 | 8160  | 24259 | 18360 | 221 | .96 |
| 51000 | .45 | .55 | 10328 | 25245 | 15428 | .4498 | .5502 | 10273 | 25133 | 15373 | 10328 | 25024 | 15428 | 221 | .96 |
| 51000 | .50 | .50 | 12750 | 25500 | 12750 | .5000 | .5000 | 12695 | 25389 | 12695 | 12750 | 25279 | 12750 | 221 | .96 |
| 51000 | .55 | .45 | 15428 | 25245 | 10328 | .5502 | .4498 | 15373 | 25133 | 10273 | 15428 | 25024 | 10328 | 221 | .96 |
| 51000 | .60 | .40 | 18360 | 24480 | 8160  | .6004 | .3996 | 18307 | 24365 | 8107  | 18360 | 24259 | 8160  | 221 | .96 |
| 51000 | .65 | .35 | 21548 | 23205 | 6248  | .6507 | .3493 | 21497 | 23085 | 6197  | 21548 | 22985 | 6248  | 220 | .96 |
| 51000 | .70 | .30 | 24990 | 21420 | 4590  | .7009 | .2991 | 24944 | 21293 | 4544  | 24990 | 21202 | 4590  | 218 | .94 |
| 51000 | .75 | .25 | 28688 | 19125 | 3188  | .7511 | .2489 | 28647 | 18991 | 3147  | 28688 | 18911 | 3188  | 214 | .91 |
| 51000 | .80 | .20 | 32640 | 16320 | 2040  | .8012 | .1988 | 32607 | 16179 | 2007  | 32640 | 16114 | 2040  | 206 | .84 |
| 51000 | .85 | .15 | 36848 | 13005 | 1148  | .8513 | .1487 | 36823 | 12861 | 1123  | 36848 | 12812 | 1148  | 193 | .74 |
| 51000 | .90 | .10 | 41310 | 9180  | 510   | .9013 | .0987 | 41295 | 9040  | 495   | 41310 | 9010  | 510   | 170 | .58 |
| 51000 | .95 | .05 | 46028 | 4845  | 128   | .9511 | .0489 | 46021 | 4727  | 121   | 46028 | 4715  | 128   | 130 | .34 |
| 52000 | .05 | .95 | 130   | 4940  | 46930 | .0489 | .9511 | 124   | 4821  | 46924 | 130   | 4809  | 46930 | 131 | .34 |
| 52000 | .10 | .90 | 520   | 9360  | 42120 | .0987 | .9013 | 505   | 9219  | 42105 | 520   | 9188  | 42120 | 172 | .58 |
| 52000 | .15 | .85 | 1170  | 13260 | 37570 | .1487 | .8513 | 1145  | 13115 | 37545 | 1170  | 13065 | 37570 | 195 | .74 |
| 52000 | .20 | .80 | 2080  | 16640 | 33280 | .1988 | .8012 | 2047  | 16498 | 33247 | 2080  | 16432 | 33280 | 208 | .84 |
| 52000 | .25 | .75 | 3250  | 19500 | 29250 | .2490 | .7510 | 3209  | 19365 | 29209 | 3250  | 19284 | 29250 | 216 | .91 |
| 52000 | .30 | .70 | 4680  | 21840 | 25480 | .2991 | .7009 | 4634  | 21712 | 25434 | 4680  | 21619 | 25480 | 221 | .94 |
| 52000 | .35 | .65 | 6370  | 23660 | 21970 | .3494 | .6506 | 6319  | 23539 | 21919 | 6370  | 23437 | 21970 | 223 | .96 |
| 52000 | .40 | .60 | 8320  | 24960 | 18720 | .3996 | .6004 | 8266  | 24844 | 18666 | 8320  | 24737 | 18720 | 223 | .96 |
| 52000 | .45 | .55 | 10530 | 25740 | 15730 | .4498 | .5502 | 10475 | 25627 | 15675 | 10530 | 25517 | 15730 | 223 | .96 |
| 52000 | .50 | .50 | 13000 | 26000 | 13000 | .5000 | .5000 | 12944 | 25888 | 12944 | 13000 | 25777 | 13000 | 223 | .96 |
| 52000 | .55 | .45 | 15730 | 25740 | 10530 | .5502 | .4498 | 15675 | 25627 | 10475 | 15730 | 25517 | 10530 | 223 | .96 |
| 52000 | .60 | .40 | 18720 | 24960 | 8320  | .6004 | .3996 | 18666 | 24844 | 8266  | 18720 | 24737 | 8320  | 223 | .96 |

|       |     |     |       |       |       |       |       |       |       |       |       |       |       |     |     |
|-------|-----|-----|-------|-------|-------|-------|-------|-------|-------|-------|-------|-------|-------|-----|-----|
| 52000 | .65 | .35 | 21970 | 23660 | 6370  | .6506 | .3494 | 21919 | 23539 | 6319  | 21970 | 23437 | 6370  | 223 | .96 |
| 52000 | .70 | .30 | 25480 | 21840 | 4680  | .7009 | .2991 | 25434 | 21712 | 4634  | 25480 | 21619 | 4680  | 221 | .94 |
| 52000 | .75 | .25 | 29250 | 19500 | 3250  | .7510 | .2490 | 29209 | 19365 | 3209  | 29250 | 19284 | 3250  | 216 | .91 |
| 52000 | .80 | .20 | 33280 | 16640 | 2080  | .8012 | .1988 | 33247 | 16498 | 2047  | 33280 | 16432 | 2080  | 208 | .84 |
| 52000 | .85 | .15 | 37570 | 13260 | 1170  | .8513 | .1487 | 37545 | 13115 | 1145  | 37570 | 13065 | 1170  | 195 | .74 |
| 52000 | .90 | .10 | 42120 | 9360  | 520   | .9013 | .0987 | 42105 | 9219  | 505   | 42120 | 9188  | 520   | 172 | .58 |
| 52000 | .95 | .05 | 46930 | 4940  | 130   | .9511 | .0489 | 46924 | 4821  | 124   | 46930 | 4809  | 130   | 131 | .34 |
| 53000 | .05 | .95 | 133   | 5035  | 47833 | .0489 | .9511 | 126   | 4915  | 47826 | 133   | 4903  | 47833 | 132 | .34 |
| 53000 | .10 | .90 | 530   | 9540  | 42930 | .0987 | .9013 | 514   | 9398  | 42914 | 530   | 9367  | 42930 | 173 | .58 |
| 53000 | .15 | .85 | 1193  | 13515 | 38293 | .1487 | .8513 | 1168  | 13368 | 38268 | 1193  | 13318 | 38293 | 197 | .74 |
| 53000 | .20 | .80 | 2120  | 16960 | 33920 | .1988 | .8012 | 2086  | 16817 | 33886 | 2120  | 16750 | 33920 | 210 | .84 |
| 53000 | .25 | .75 | 3313  | 19875 | 29813 | .2490 | .7510 | 3272  | 19738 | 29772 | 3313  | 19657 | 29813 | 218 | .91 |
| 53000 | .30 | .70 | 4770  | 22260 | 25970 | .2992 | .7008 | 4723  | 22131 | 25923 | 4770  | 22037 | 25970 | 223 | .94 |
| 53000 | .35 | .65 | 6493  | 24115 | 22393 | .3494 | .6506 | 6441  | 23992 | 22341 | 6493  | 23890 | 22393 | 225 | .96 |
| 53000 | .40 | .60 | 8480  | 25440 | 19080 | .3996 | .6004 | 8426  | 25323 | 19026 | 8480  | 25215 | 19080 | 225 | .96 |
| 53000 | .45 | .55 | 10733 | 26235 | 16033 | .4498 | .5502 | 10677 | 26121 | 15977 | 10733 | 26009 | 16033 | 226 | .96 |
| 53000 | .50 | .50 | 13250 | 26500 | 13250 | .5000 | .5000 | 13194 | 26387 | 13194 | 13250 | 26274 | 13250 | 226 | .96 |
| 53000 | .55 | .45 | 16033 | 26235 | 10733 | .5502 | .4498 | 15977 | 26121 | 10677 | 16033 | 26009 | 10733 | 226 | .96 |
| 53000 | .60 | .40 | 19080 | 25440 | 8480  | .6004 | .3996 | 19026 | 25323 | 8426  | 19080 | 25215 | 8480  | 225 | .96 |
| 53000 | .65 | .35 | 22393 | 24115 | 6493  | .6506 | .3494 | 22341 | 23992 | 6441  | 22393 | 23890 | 6493  | 225 | .96 |
| 53000 | .70 | .30 | 25970 | 22260 | 4770  | .7008 | .2992 | 25923 | 22131 | 4723  | 25970 | 22037 | 4770  | 223 | .94 |
| 53000 | .75 | .25 | 29813 | 19875 | 3313  | .7510 | .2490 | 29772 | 19738 | 3272  | 29813 | 19657 | 3313  | 218 | .91 |
| 53000 | .80 | .20 | 33920 | 16960 | 2120  | .8012 | .1988 | 33886 | 16817 | 2086  | 33920 | 16750 | 2120  | 210 | .84 |
| 53000 | .85 | .15 | 38293 | 13515 | 1193  | .8513 | .1487 | 38268 | 13368 | 1168  | 38293 | 13318 | 1193  | 197 | .74 |
| 53000 | .90 | .10 | 42930 | 9540  | 530   | .9013 | .0987 | 42914 | 9398  | 514   | 42930 | 9367  | 530   | 173 | .58 |
| 53000 | .95 | .05 | 47833 | 5035  | 133   | .9511 | .0489 | 47826 | 4915  | 126   | 47833 | 4903  | 133   | 132 | .34 |
| 54000 | .05 | .95 | 135   | 5130  | 48735 | .0489 | .9511 | 129   | 5009  | 48729 | 135   | 4996  | 48735 | 134 | .34 |
| 54000 | .10 | .90 | 540   | 9720  | 43740 | .0987 | .9013 | 524   | 9576  | 43724 | 540   | 9545  | 43740 | 175 | .58 |
| 54000 | .15 | .85 | 1215  | 13770 | 39015 | .1487 | .8513 | 1190  | 13622 | 38990 | 1215  | 13571 | 39015 | 199 | .74 |
| 54000 | .20 | .80 | 2160  | 17280 | 34560 | .1988 | .8012 | 2126  | 17135 | 34526 | 2160  | 17068 | 34560 | 212 | .84 |
| 54000 | .25 | .75 | 3375  | 20250 | 30375 | .2490 | .7510 | 3334  | 20112 | 30334 | 3375  | 20030 | 30375 | 221 | .91 |
| 54000 | .30 | .70 | 4860  | 22680 | 26460 | .2992 | .7008 | 4813  | 22550 | 26413 | 4860  | 22455 | 26460 | 225 | .94 |
| 54000 | .35 | .65 | 6615  | 24570 | 22815 | .3494 | .6506 | 6563  | 24446 | 22763 | 6615  | 24343 | 22815 | 227 | .96 |

|       |     |     |       |       |       |       |       |       |       |       |       |       |       |     |     |
|-------|-----|-----|-------|-------|-------|-------|-------|-------|-------|-------|-------|-------|-------|-----|-----|
| 54000 | .40 | .60 | 8640  | 25920 | 19440 | .3996 | .6004 | 8585  | 25802 | 19385 | 8640  | 25692 | 19440 | 228 | .96 |
| 54000 | .45 | .55 | 10935 | 26730 | 16335 | .4498 | .5502 | 10879 | 26615 | 16279 | 10935 | 26502 | 16335 | 228 | .96 |
| 54000 | .50 | .50 | 13500 | 27000 | 13500 | .5000 | .5000 | 13443 | 26886 | 13443 | 13500 | 26772 | 13500 | 228 | .96 |
| 54000 | .55 | .45 | 16335 | 26730 | 10935 | .5502 | .4498 | 16279 | 26615 | 10879 | 16335 | 26502 | 10935 | 228 | .96 |
| 54000 | .60 | .40 | 19440 | 25920 | 8640  | .6004 | .3996 | 19385 | 25802 | 8585  | 19440 | 25692 | 8640  | 228 | .96 |
| 54000 | .65 | .35 | 22815 | 24570 | 6615  | .6506 | .3494 | 22763 | 24446 | 6563  | 22815 | 24343 | 6615  | 227 | .96 |
| 54000 | .70 | .30 | 26460 | 22680 | 4860  | .7008 | .2992 | 26413 | 22550 | 4813  | 26460 | 22455 | 4860  | 225 | .94 |
| 54000 | .75 | .25 | 30375 | 20250 | 3375  | .7510 | .2490 | 30334 | 20112 | 3334  | 30375 | 20030 | 3375  | 221 | .91 |
| 54000 | .80 | .20 | 34560 | 17280 | 2160  | .8012 | .1988 | 34526 | 17135 | 2126  | 34560 | 17068 | 2160  | 212 | .84 |
| 54000 | .85 | .15 | 39015 | 13770 | 1215  | .8513 | .1487 | 38990 | 13622 | 1190  | 39015 | 13571 | 1215  | 199 | .74 |
| 54000 | .90 | .10 | 43740 | 9720  | 540   | .9013 | .0987 | 43724 | 9576  | 524   | 43740 | 9545  | 540   | 175 | .58 |
| 54000 | .95 | .05 | 48735 | 5130  | 135   | .9511 | .0489 | 48729 | 5009  | 129   | 48735 | 4996  | 135   | 134 | .34 |
| 55000 | .05 | .95 | 138   | 5225  | 49638 | .0489 | .9511 | 131   | 5103  | 49631 | 138   | 5090  | 49638 | 135 | .34 |
| 55000 | .10 | .90 | 550   | 9900  | 44550 | .0987 | .9013 | 534   | 9755  | 44534 | 550   | 9723  | 44550 | 177 | .58 |
| 55000 | .15 | .85 | 1238  | 14025 | 39738 | .1487 | .8513 | 1212  | 13876 | 39712 | 1238  | 13825 | 39738 | 200 | .74 |
| 55000 | .20 | .80 | 2200  | 17600 | 35200 | .1988 | .8012 | 2166  | 17454 | 35166 | 2200  | 17386 | 35200 | 214 | .84 |
| 55000 | .25 | .75 | 3438  | 20625 | 30938 | .2490 | .7510 | 3396  | 20486 | 30896 | 3438  | 20402 | 30938 | 223 | .91 |
| 55000 | .30 | .70 | 4950  | 23100 | 26950 | .2992 | .7008 | 4902  | 22968 | 26902 | 4950  | 22873 | 26950 | 227 | .94 |
| 55000 | .35 | .65 | 6738  | 25025 | 23238 | .3494 | .6506 | 6685  | 24900 | 23185 | 6738  | 24796 | 23238 | 229 | .96 |
| 55000 | .40 | .60 | 8800  | 26400 | 19800 | .3996 | .6004 | 8745  | 26281 | 19745 | 8800  | 26170 | 19800 | 230 | .96 |
| 55000 | .45 | .55 | 11138 | 27225 | 16638 | .4498 | .5502 | 11081 | 27109 | 16581 | 11138 | 26995 | 16638 | 230 | .96 |
| 55000 | .50 | .50 | 13750 | 27500 | 13750 | .5000 | .5000 | 13693 | 27385 | 13693 | 13750 | 27270 | 13750 | 230 | .96 |
| 55000 | .55 | .45 | 16638 | 27225 | 11138 | .5502 | .4498 | 16581 | 27109 | 11081 | 16638 | 26995 | 11138 | 230 | .96 |
| 55000 | .60 | .40 | 19800 | 26400 | 8800  | .6004 | .3996 | 19745 | 26281 | 8745  | 19800 | 26170 | 8800  | 230 | .96 |
| 55000 | .65 | .35 | 23238 | 25025 | 6738  | .6506 | .3494 | 23185 | 24900 | 6685  | 23238 | 24796 | 6738  | 229 | .96 |
| 55000 | .70 | .30 | 26950 | 23100 | 4950  | .7008 | .2992 | 26902 | 22968 | 4902  | 26950 | 22873 | 4950  | 227 | .94 |
| 55000 | .75 | .25 | 30938 | 20625 | 3438  | .7510 | .2490 | 30896 | 20486 | 3396  | 30938 | 20402 | 3438  | 223 | .91 |
| 55000 | .80 | .20 | 35200 | 17600 | 2200  | .8012 | .1988 | 35166 | 17454 | 2166  | 35200 | 17386 | 2200  | 214 | .84 |
| 55000 | .85 | .15 | 39738 | 14025 | 1238  | .8513 | .1487 | 39712 | 13876 | 1212  | 39738 | 13825 | 1238  | 200 | .74 |
| 55000 | .90 | .10 | 44550 | 9900  | 550   | .9013 | .0987 | 44534 | 9755  | 534   | 44550 | 9723  | 550   | 177 | .58 |
| 55000 | .95 | .05 | 49638 | 5225  | 138   | .9511 | .0489 | 49631 | 5103  | 131   | 49638 | 5090  | 138   | 135 | .34 |
| 56000 | .05 | .95 | 140   | 5320  | 50540 | .0489 | .9511 | 134   | 5197  | 50534 | 140   | 5184  | 50540 | 136 | .34 |
| 56000 | .10 | .90 | 560   | 10080 | 45360 | .0987 | .9013 | 544   | 9934  | 45344 | 560   | 9902  | 45360 | 178 | .58 |



|       |     |     |       |       |       |       |       |       |       |       |       |       |       |     |     |
|-------|-----|-----|-------|-------|-------|-------|-------|-------|-------|-------|-------|-------|-------|-----|-----|
| 56000 | .15 | .85 | 1260  | 14280 | 40460 | .1487 | .8513 | 1234  | 14129 | 40434 | 1260  | 14078 | 40460 | 202 | .74 |
| 56000 | .20 | .80 | 2240  | 17920 | 35840 | .1988 | .8012 | 2205  | 17773 | 35805 | 2240  | 17704 | 35840 | 216 | .84 |
| 56000 | .25 | .75 | 3500  | 21000 | 31500 | .2490 | .7510 | 3458  | 20860 | 31458 | 3500  | 20775 | 31500 | 225 | .91 |
| 56000 | .30 | .70 | 5040  | 23520 | 27440 | .2992 | .7008 | 4992  | 23387 | 27392 | 5040  | 23291 | 27440 | 229 | .94 |
| 56000 | .35 | .65 | 6860  | 25480 | 23660 | .3494 | .6506 | 6807  | 25354 | 23607 | 6860  | 25249 | 23660 | 231 | .96 |
| 56000 | .40 | .60 | 8960  | 26880 | 20160 | .3996 | .6004 | 8904  | 26759 | 20104 | 8960  | 26648 | 20160 | 232 | .96 |
| 56000 | .45 | .55 | 11340 | 27720 | 16940 | .4498 | .5502 | 11283 | 27603 | 16883 | 11340 | 27488 | 16940 | 232 | .96 |
| 56000 | .50 | .50 | 14000 | 28000 | 14000 | .5000 | .5000 | 13942 | 27884 | 13942 | 14000 | 27768 | 14000 | 232 | .96 |
| 56000 | .55 | .45 | 16940 | 27720 | 11340 | .5502 | .4498 | 16883 | 27603 | 11283 | 16940 | 27488 | 11340 | 232 | .96 |
| 56000 | .60 | .40 | 20160 | 26880 | 8960  | .6004 | .3996 | 20104 | 26759 | 8904  | 20160 | 26648 | 8960  | 232 | .96 |
| 56000 | .65 | .35 | 23660 | 25480 | 6860  | .6506 | .3494 | 23607 | 25354 | 6807  | 23660 | 25249 | 6860  | 231 | .96 |
| 56000 | .70 | .30 | 27440 | 23520 | 5040  | .7008 | .2992 | 27392 | 23387 | 4992  | 27440 | 23291 | 5040  | 229 | .94 |
| 56000 | .75 | .25 | 31500 | 21000 | 3500  | .7510 | .2490 | 31458 | 20860 | 3458  | 31500 | 20775 | 3500  | 225 | .91 |
| 56000 | .80 | .20 | 35840 | 17920 | 2240  | .8012 | .1988 | 35805 | 17773 | 2205  | 35840 | 17704 | 2240  | 216 | .84 |
| 56000 | .85 | .15 | 40460 | 14280 | 1260  | .8513 | .1487 | 40434 | 14129 | 1234  | 40460 | 14078 | 1260  | 202 | .74 |
| 56000 | .90 | .10 | 45360 | 10080 | 560   | .9013 | .0987 | 45344 | 9934  | 544   | 45360 | 9902  | 560   | 178 | .58 |
| 56000 | .95 | .05 | 50540 | 5320  | 140   | .9511 | .0489 | 50534 | 5197  | 134   | 50540 | 5184  | 140   | 136 | .34 |
| 57000 | .05 | .95 | 143   | 5415  | 51443 | .0489 | .9511 | 136   | 5291  | 51436 | 143   | 5278  | 51443 | 137 | .34 |
| 57000 | .10 | .90 | 570   | 10260 | 46170 | .0987 | .9013 | 554   | 10112 | 46154 | 570   | 10080 | 46170 | 180 | .58 |
| 57000 | .15 | .85 | 1283  | 14535 | 41183 | .1487 | .8513 | 1257  | 14383 | 41157 | 1283  | 14331 | 41183 | 204 | .74 |
| 57000 | .20 | .80 | 2280  | 18240 | 36480 | .1988 | .8012 | 2245  | 18091 | 36445 | 2280  | 18022 | 36480 | 218 | .84 |
| 57000 | .25 | .75 | 3563  | 21375 | 32063 | .2490 | .7510 | 3520  | 21233 | 32020 | 3563  | 21148 | 32063 | 227 | .91 |
| 57000 | .30 | .70 | 5130  | 23940 | 27930 | .2992 | .7008 | 5082  | 23806 | 27882 | 5130  | 23709 | 27930 | 231 | .94 |
| 57000 | .35 | .65 | 6983  | 25935 | 24083 | .3494 | .6506 | 6930  | 25808 | 24030 | 6983  | 25702 | 24083 | 233 | .96 |
| 57000 | .40 | .60 | 9120  | 27360 | 20520 | .3996 | .6004 | 9064  | 27238 | 20464 | 9120  | 27126 | 20520 | 234 | .96 |
| 57000 | .45 | .55 | 11543 | 28215 | 17243 | .4498 | .5502 | 11485 | 28097 | 17185 | 11543 | 27981 | 17243 | 234 | .96 |
| 57000 | .50 | .50 | 14250 | 28500 | 14250 | .5000 | .5000 | 14192 | 28383 | 14192 | 14250 | 28266 | 14250 | 234 | .96 |
| 57000 | .55 | .45 | 17243 | 28215 | 11543 | .5502 | .4498 | 17185 | 28097 | 11485 | 17243 | 27981 | 11543 | 234 | .96 |
| 57000 | .60 | .40 | 20520 | 27360 | 9120  | .6004 | .3996 | 20464 | 27238 | 9064  | 20520 | 27126 | 9120  | 234 | .96 |
| 57000 | .65 | .35 | 24083 | 25935 | 6983  | .6506 | .3494 | 24030 | 25808 | 6930  | 24083 | 25702 | 6983  | 233 | .96 |
| 57000 | .70 | .30 | 27930 | 23940 | 5130  | .7008 | .2992 | 27882 | 23806 | 5082  | 27930 | 23709 | 5130  | 231 | .94 |
| 57000 | .75 | .25 | 32063 | 21375 | 3563  | .7510 | .2490 | 32020 | 21233 | 3520  | 32063 | 21148 | 3563  | 227 | .91 |
| 57000 | .80 | .20 | 36480 | 18240 | 2280  | .8012 | .1988 | 36445 | 18091 | 2245  | 36480 | 18022 | 2280  | 218 | .84 |

|       |     |     |       |       |       |       |       |       |       |       |       |       |       |     |     |
|-------|-----|-----|-------|-------|-------|-------|-------|-------|-------|-------|-------|-------|-------|-----|-----|
| 57000 | .85 | .15 | 41183 | 14535 | 1283  | .8513 | .1487 | 41157 | 14383 | 1257  | 41183 | 14331 | 1283  | 204 | .74 |
| 57000 | .90 | .10 | 46170 | 10260 | 570   | .9013 | .0987 | 46154 | 10112 | 554   | 46170 | 10080 | 570   | 180 | .58 |
| 57000 | .95 | .05 | 51443 | 5415  | 143   | .9511 | .0489 | 51436 | 5291  | 136   | 51443 | 5278  | 143   | 137 | .34 |
| 58000 | .05 | .95 | 145   | 5510  | 52345 | .0489 | .9511 | 138   | 5385  | 52338 | 145   | 5372  | 52345 | 138 | .34 |
| 58000 | .10 | .90 | 580   | 10440 | 46980 | .0987 | .9013 | 564   | 10291 | 46964 | 580   | 10259 | 46980 | 181 | .58 |
| 58000 | .15 | .85 | 1305  | 14790 | 41905 | .1488 | .8512 | 1279  | 14637 | 41879 | 1305  | 14584 | 41905 | 206 | .74 |
| 58000 | .20 | .80 | 2320  | 18560 | 37120 | .1989 | .8011 | 2285  | 18410 | 37085 | 2320  | 18340 | 37120 | 220 | .84 |
| 58000 | .25 | .75 | 3625  | 21750 | 32625 | .2490 | .7510 | 3582  | 21607 | 32582 | 3625  | 21521 | 32625 | 229 | .91 |
| 58000 | .30 | .70 | 5220  | 24360 | 28420 | .2992 | .7008 | 5171  | 24225 | 28371 | 5220  | 24127 | 28420 | 233 | .94 |
| 58000 | .35 | .65 | 7105  | 26390 | 24505 | .3494 | .6506 | 7052  | 26262 | 24452 | 7105  | 26155 | 24505 | 235 | .96 |
| 58000 | .40 | .60 | 9280  | 27840 | 20880 | .3996 | .6004 | 9223  | 27717 | 20823 | 9280  | 27604 | 20880 | 236 | .96 |
| 58000 | .45 | .55 | 11745 | 28710 | 17545 | .4498 | .5502 | 11687 | 28591 | 17487 | 11745 | 28474 | 17545 | 236 | .96 |
| 58000 | .50 | .50 | 14500 | 29000 | 14500 | .5000 | .5000 | 14441 | 28882 | 14441 | 14500 | 28764 | 14500 | 236 | .96 |
| 58000 | .55 | .45 | 17545 | 28710 | 11745 | .5502 | .4498 | 17487 | 28591 | 11687 | 17545 | 28474 | 11745 | 236 | .96 |
| 58000 | .60 | .40 | 20880 | 27840 | 9280  | .6004 | .3996 | 20823 | 27717 | 9223  | 20880 | 27604 | 9280  | 236 | .96 |
| 58000 | .65 | .35 | 24505 | 26390 | 7105  | .6506 | .3494 | 24452 | 26262 | 7052  | 24505 | 26155 | 7105  | 235 | .96 |
| 58000 | .70 | .30 | 28420 | 24360 | 5220  | .7008 | .2992 | 28371 | 24225 | 5171  | 28420 | 24127 | 5220  | 233 | .94 |
| 58000 | .75 | .25 | 32625 | 21750 | 3625  | .7510 | .2490 | 32582 | 21607 | 3582  | 32625 | 21521 | 3625  | 229 | .91 |
| 58000 | .80 | .20 | 37120 | 18560 | 2320  | .8011 | .1989 | 37085 | 18410 | 2285  | 37120 | 18340 | 2320  | 220 | .84 |
| 58000 | .85 | .15 | 41905 | 14790 | 1305  | .8512 | .1488 | 41879 | 14637 | 1279  | 41905 | 14584 | 1305  | 206 | .74 |
| 58000 | .90 | .10 | 46980 | 10440 | 580   | .9013 | .0987 | 46964 | 10291 | 564   | 46980 | 10259 | 580   | 181 | .58 |
| 58000 | .95 | .05 | 52345 | 5510  | 145   | .9511 | .0489 | 52338 | 5385  | 138   | 52345 | 5372  | 145   | 138 | .34 |
| 59000 | .05 | .95 | 148   | 5605  | 53248 | .0489 | .9511 | 141   | 5479  | 53241 | 148   | 5465  | 53248 | 140 | .34 |
| 59000 | .10 | .90 | 590   | 10620 | 47790 | .0988 | .9012 | 574   | 10470 | 47774 | 590   | 10437 | 47790 | 183 | .58 |
| 59000 | .15 | .85 | 1328  | 15045 | 42628 | .1488 | .8512 | 1301  | 14890 | 42601 | 1328  | 14837 | 42628 | 208 | .74 |
| 59000 | .20 | .80 | 2360  | 18880 | 37760 | .1989 | .8011 | 2325  | 18729 | 37725 | 2360  | 18658 | 37760 | 222 | .84 |
| 59000 | .25 | .75 | 3688  | 22125 | 33188 | .2490 | .7510 | 3644  | 21981 | 33144 | 3688  | 21895 | 33188 | 230 | .91 |
| 59000 | .30 | .70 | 5310  | 24780 | 28910 | .2992 | .7008 | 5261  | 24644 | 28861 | 5310  | 24545 | 28910 | 235 | .94 |
| 59000 | .35 | .65 | 7228  | 26845 | 24928 | .3494 | .6506 | 7174  | 26716 | 24874 | 7228  | 26608 | 24928 | 237 | .96 |
| 59000 | .40 | .60 | 9440  | 28320 | 21240 | .3996 | .6004 | 9383  | 28196 | 21183 | 9440  | 28082 | 21240 | 238 | .96 |
| 59000 | .45 | .55 | 11948 | 29205 | 17848 | .4498 | .5502 | 11889 | 29085 | 17789 | 11948 | 28967 | 17848 | 238 | .96 |
| 59000 | .50 | .50 | 14750 | 29500 | 14750 | .5000 | .5000 | 14690 | 29381 | 14690 | 14750 | 29262 | 14750 | 238 | .96 |
| 59000 | .55 | .45 | 17848 | 29205 | 11948 | .5502 | .4498 | 17789 | 29085 | 11889 | 17848 | 28967 | 11948 | 238 | .96 |

|       |     |     |       |       |       |       |       |       |       |       |       |       |       |     |     |
|-------|-----|-----|-------|-------|-------|-------|-------|-------|-------|-------|-------|-------|-------|-----|-----|
| 59000 | .60 | .40 | 21240 | 28320 | 9440  | .6004 | .3996 | 21183 | 28196 | 9383  | 21240 | 28082 | 9440  | 238 | .96 |
| 59000 | .65 | .35 | 24928 | 26845 | 7228  | .6506 | .3494 | 24874 | 26716 | 7174  | 24928 | 26608 | 7228  | 237 | .96 |
| 59000 | .70 | .30 | 28910 | 24780 | 5310  | .7008 | .2992 | 28861 | 24644 | 5261  | 28910 | 24545 | 5310  | 235 | .94 |
| 59000 | .75 | .25 | 33188 | 22125 | 3688  | .7510 | .2490 | 33144 | 21981 | 3644  | 33188 | 21895 | 3688  | 230 | .91 |
| 59000 | .80 | .20 | 37760 | 18880 | 2360  | .8011 | .1989 | 37725 | 18729 | 2325  | 37760 | 18658 | 2360  | 222 | .84 |
| 59000 | .85 | .15 | 42628 | 15045 | 1328  | .8512 | .1488 | 42601 | 14890 | 1301  | 42628 | 14837 | 1328  | 208 | .74 |
| 59000 | .90 | .10 | 47790 | 10620 | 590   | .9012 | .0988 | 47774 | 10470 | 574   | 47790 | 10437 | 590   | 183 | .58 |
| 59000 | .95 | .05 | 53248 | 5605  | 148   | .9511 | .0489 | 53241 | 5479  | 141   | 53248 | 5465  | 148   | 140 | .34 |
| 60000 | .05 | .95 | 150   | 5700  | 54150 | .0489 | .9511 | 143   | 5572  | 54143 | 150   | 5559  | 54150 | 141 | .34 |
| 60000 | .10 | .90 | 600   | 10800 | 48600 | .0988 | .9012 | 583   | 10649 | 48583 | 600   | 10616 | 48600 | 184 | .58 |
| 60000 | .15 | .85 | 1350  | 15300 | 43350 | .1488 | .8512 | 1323  | 15144 | 43323 | 1350  | 15091 | 43350 | 209 | .74 |
| 60000 | .20 | .80 | 2400  | 19200 | 38400 | .1989 | .8011 | 2364  | 19048 | 38364 | 2400  | 18976 | 38400 | 224 | .84 |
| 60000 | .25 | .75 | 3750  | 22500 | 33750 | .2490 | .7510 | 3706  | 22355 | 33706 | 3750  | 22268 | 33750 | 232 | .91 |
| 60000 | .30 | .70 | 5400  | 25200 | 29400 | .2992 | .7008 | 5350  | 25062 | 29350 | 5400  | 24963 | 29400 | 237 | .94 |
| 60000 | .35 | .65 | 7350  | 27300 | 25350 | .3494 | .6506 | 7296  | 27170 | 25296 | 7350  | 27061 | 25350 | 239 | .96 |
| 60000 | .40 | .60 | 9600  | 28800 | 21600 | .3996 | .6004 | 9542  | 28675 | 21542 | 9600  | 28560 | 21600 | 240 | .96 |
| 60000 | .45 | .55 | 12150 | 29700 | 18150 | .4498 | .5502 | 12091 | 29579 | 18091 | 12150 | 29460 | 18150 | 240 | .96 |
| 60000 | .50 | .50 | 15000 | 30000 | 15000 | .5000 | .5000 | 14940 | 29880 | 14940 | 15000 | 29760 | 15000 | 240 | .96 |
| 60000 | .55 | .45 | 18150 | 29700 | 12150 | .5502 | .4498 | 18091 | 29579 | 12091 | 18150 | 29460 | 12150 | 240 | .96 |
| 60000 | .60 | .40 | 21600 | 28800 | 9600  | .6004 | .3996 | 21542 | 28675 | 9542  | 21600 | 28560 | 9600  | 240 | .96 |
| 60000 | .65 | .35 | 25350 | 27300 | 7350  | .6506 | .3494 | 25296 | 27170 | 7296  | 25350 | 27061 | 7350  | 239 | .96 |
| 60000 | .70 | .30 | 29400 | 25200 | 5400  | .7008 | .2992 | 29350 | 25062 | 5350  | 29400 | 24963 | 5400  | 237 | .94 |
| 60000 | .75 | .25 | 33750 | 22500 | 3750  | .7510 | .2490 | 33706 | 22355 | 3706  | 33750 | 22268 | 3750  | 232 | .91 |
| 60000 | .80 | .20 | 38400 | 19200 | 2400  | .8011 | .1989 | 38364 | 19048 | 2364  | 38400 | 18976 | 2400  | 224 | .84 |
| 60000 | .85 | .15 | 43350 | 15300 | 1350  | .8512 | .1488 | 43323 | 15144 | 1323  | 43350 | 15091 | 1350  | 209 | .74 |
| 60000 | .90 | .10 | 48600 | 10800 | 600   | .9012 | .0988 | 48583 | 10649 | 583   | 48600 | 10616 | 600   | 184 | .58 |
| 60000 | .95 | .05 | 54150 | 5700  | 150   | .9511 | .0489 | 54143 | 5572  | 143   | 54150 | 5559  | 150   | 141 | .34 |
| 61000 | .05 | .95 | 153   | 5795  | 55053 | .0490 | .9510 | 146   | 5666  | 55046 | 153   | 5653  | 55053 | 142 | .34 |
| 61000 | .10 | .90 | 610   | 10980 | 49410 | .0988 | .9012 | 593   | 10827 | 49393 | 610   | 10794 | 49410 | 186 | .58 |
| 61000 | .15 | .85 | 1373  | 15555 | 44073 | .1488 | .8512 | 1346  | 15398 | 44046 | 1373  | 15344 | 44073 | 211 | .74 |
| 61000 | .20 | .80 | 2440  | 19520 | 39040 | .1989 | .8011 | 2404  | 19366 | 39004 | 2440  | 19294 | 39040 | 226 | .84 |
| 61000 | .25 | .75 | 3813  | 22875 | 34313 | .2490 | .7510 | 3769  | 22728 | 34269 | 3813  | 22641 | 34313 | 234 | .91 |
| 61000 | .30 | .70 | 5490  | 25620 | 29890 | .2992 | .7008 | 5440  | 25481 | 29840 | 5490  | 25381 | 29890 | 239 | .94 |

|       |     |     |       |       |       |       |       |       |       |       |       |       |       |     |     |
|-------|-----|-----|-------|-------|-------|-------|-------|-------|-------|-------|-------|-------|-------|-----|-----|
| 61000 | .35 | .65 | 7473  | 27755 | 25773 | .3494 | .6506 | 7418  | 27624 | 25718 | 7473  | 27514 | 25773 | 241 | .96 |
| 61000 | .40 | .60 | 9760  | 29280 | 21960 | .3996 | .6004 | 9702  | 29154 | 21902 | 9760  | 29038 | 21960 | 242 | .96 |
| 61000 | .45 | .55 | 12353 | 30195 | 18453 | .4498 | .5502 | 12293 | 30073 | 18393 | 12353 | 29953 | 18453 | 242 | .96 |
| 61000 | .50 | .50 | 15250 | 30500 | 15250 | .5000 | .5000 | 15189 | 30379 | 15189 | 15250 | 30258 | 15250 | 242 | .96 |
| 61000 | .55 | .45 | 18453 | 30195 | 12353 | .5502 | .4498 | 18393 | 30073 | 12293 | 18453 | 29953 | 12353 | 242 | .96 |
| 61000 | .60 | .40 | 21960 | 29280 | 9760  | .6004 | .3996 | 21902 | 29154 | 9702  | 21960 | 29038 | 9760  | 242 | .96 |
| 61000 | .65 | .35 | 25773 | 27755 | 7473  | .6506 | .3494 | 25718 | 27624 | 7418  | 25773 | 27514 | 7473  | 241 | .96 |
| 61000 | .70 | .30 | 29890 | 25620 | 5490  | .7008 | .2992 | 29840 | 25481 | 5440  | 29890 | 25381 | 5490  | 239 | .94 |
| 61000 | .75 | .25 | 34313 | 22875 | 3813  | .7510 | .2490 | 34269 | 22728 | 3769  | 34313 | 22641 | 3813  | 234 | .91 |
| 61000 | .80 | .20 | 39040 | 19520 | 2440  | .8011 | .1989 | 39004 | 19366 | 2404  | 39040 | 19294 | 2440  | 226 | .84 |
| 61000 | .85 | .15 | 44073 | 15555 | 1373  | .8512 | .1488 | 44046 | 15398 | 1346  | 44073 | 15344 | 1373  | 211 | .74 |
| 61000 | .90 | .10 | 49410 | 10980 | 610   | .9012 | .0988 | 49393 | 10827 | 593   | 49410 | 10794 | 610   | 186 | .58 |
| 61000 | .95 | .05 | 55053 | 5795  | 153   | .9510 | .0490 | 55046 | 5666  | 146   | 55053 | 5653  | 153   | 142 | .34 |
| 62000 | .05 | .95 | 155   | 5890  | 55955 | .0490 | .9510 | 148   | 5760  | 55948 | 155   | 5747  | 55955 | 143 | .34 |
| 62000 | .10 | .90 | 620   | 11160 | 50220 | .0988 | .9012 | 603   | 11006 | 50203 | 620   | 10973 | 50220 | 187 | .57 |
| 62000 | .15 | .85 | 1395  | 15810 | 44795 | .1488 | .8512 | 1368  | 15651 | 44768 | 1395  | 15597 | 44795 | 213 | .74 |
| 62000 | .20 | .80 | 2480  | 19840 | 39680 | .1989 | .8011 | 2444  | 19685 | 39644 | 2480  | 19612 | 39680 | 228 | .84 |
| 62000 | .25 | .75 | 3875  | 23250 | 34875 | .2490 | .7510 | 3831  | 23102 | 34831 | 3875  | 23014 | 34875 | 236 | .91 |
| 62000 | .30 | .70 | 5580  | 26040 | 30380 | .2992 | .7008 | 5529  | 25900 | 30329 | 5580  | 25799 | 30380 | 241 | .94 |
| 62000 | .35 | .65 | 7595  | 28210 | 26195 | .3494 | .6506 | 7540  | 28078 | 26140 | 7595  | 27967 | 26195 | 243 | .96 |
| 62000 | .40 | .60 | 9920  | 29760 | 22320 | .3996 | .6004 | 9861  | 29633 | 22261 | 9920  | 29516 | 22320 | 244 | .96 |
| 62000 | .45 | .55 | 12555 | 30690 | 18755 | .4498 | .5502 | 12495 | 30567 | 18695 | 12555 | 30446 | 18755 | 244 | .96 |
| 62000 | .50 | .50 | 15500 | 31000 | 15500 | .5000 | .5000 | 15439 | 30878 | 15439 | 15500 | 30756 | 15500 | 244 | .96 |
| 62000 | .55 | .45 | 18755 | 30690 | 12555 | .5502 | .4498 | 18695 | 30567 | 12495 | 18755 | 30446 | 12555 | 244 | .96 |
| 62000 | .60 | .40 | 22320 | 29760 | 9920  | .6004 | .3996 | 22261 | 29633 | 9861  | 22320 | 29516 | 9920  | 244 | .96 |
| 62000 | .65 | .35 | 26195 | 28210 | 7595  | .6506 | .3494 | 26140 | 28078 | 7540  | 26195 | 27967 | 7595  | 243 | .96 |
| 62000 | .70 | .30 | 30380 | 26040 | 5580  | .7008 | .2992 | 30329 | 25900 | 5529  | 30380 | 25799 | 5580  | 241 | .94 |
| 62000 | .75 | .25 | 34875 | 23250 | 3875  | .7510 | .2490 | 34831 | 23102 | 3831  | 34875 | 23014 | 3875  | 236 | .91 |
| 62000 | .80 | .20 | 39680 | 19840 | 2480  | .8011 | .1989 | 39644 | 19685 | 2444  | 39680 | 19612 | 2480  | 228 | .84 |
| 62000 | .85 | .15 | 44795 | 15810 | 1395  | .8512 | .1488 | 44768 | 15651 | 1368  | 44795 | 15597 | 1395  | 213 | .74 |
| 62000 | .90 | .10 | 50220 | 11160 | 620   | .9012 | .0988 | 50203 | 11006 | 603   | 50220 | 10973 | 620   | 187 | .57 |
| 62000 | .95 | .05 | 55955 | 5890  | 155   | .9510 | .0490 | 55948 | 5760  | 148   | 55955 | 5747  | 155   | 143 | .34 |
| 63000 | .05 | .95 | 158   | 5985  | 56858 | .0490 | .9510 | 151   | 5854  | 56851 | 158   | 5841  | 56858 | 144 | .34 |

|       |     |     |       |       |       |       |       |       |       |       |       |       |       |     |     |
|-------|-----|-----|-------|-------|-------|-------|-------|-------|-------|-------|-------|-------|-------|-----|-----|
| 63000 | .10 | .90 | 630   | 11340 | 51030 | .0988 | .9012 | 613   | 11185 | 51013 | 630   | 11151 | 51030 | 189 | .57 |
| 63000 | .15 | .85 | 1418  | 16065 | 45518 | .1488 | .8512 | 1390  | 15905 | 45490 | 1418  | 15851 | 45518 | 214 | .74 |
| 63000 | .20 | .80 | 2520  | 20160 | 40320 | .1989 | .8011 | 2483  | 20004 | 40283 | 2520  | 19931 | 40320 | 229 | .84 |
| 63000 | .25 | .75 | 3938  | 23625 | 35438 | .2491 | .7509 | 3893  | 23476 | 35393 | 3938  | 23387 | 35438 | 238 | .91 |
| 63000 | .30 | .70 | 5670  | 26460 | 30870 | .2992 | .7008 | 5619  | 26319 | 30819 | 5670  | 26217 | 30870 | 243 | .94 |
| 63000 | .35 | .65 | 7718  | 28665 | 26618 | .3494 | .6506 | 7662  | 28531 | 26562 | 7718  | 28420 | 26618 | 245 | .96 |
| 63000 | .40 | .60 | 10080 | 30240 | 22680 | .3996 | .6004 | 10021 | 30112 | 22621 | 10080 | 29994 | 22680 | 246 | .96 |
| 63000 | .45 | .55 | 12758 | 31185 | 19058 | .4498 | .5502 | 12697 | 31061 | 18997 | 12758 | 30939 | 19058 | 246 | .96 |
| 63000 | .50 | .50 | 15750 | 31500 | 15750 | .5000 | .5000 | 15689 | 31377 | 15689 | 15750 | 31254 | 15750 | 246 | .96 |
| 63000 | .55 | .45 | 19058 | 31185 | 12758 | .5502 | .4498 | 18997 | 31061 | 12697 | 19058 | 30939 | 12758 | 246 | .96 |
| 63000 | .60 | .40 | 22680 | 30240 | 10080 | .6004 | .3996 | 22621 | 30112 | 10021 | 22680 | 29994 | 10080 | 246 | .96 |
| 63000 | .65 | .35 | 26618 | 28665 | 7718  | .6506 | .3494 | 26562 | 28531 | 7662  | 26618 | 28420 | 7718  | 245 | .96 |
| 63000 | .70 | .30 | 30870 | 26460 | 5670  | .7008 | .2992 | 30819 | 26319 | 5619  | 30870 | 26217 | 5670  | 243 | .94 |
| 63000 | .75 | .25 | 35438 | 23625 | 3938  | .7509 | .2491 | 35393 | 23476 | 3893  | 35438 | 23387 | 3938  | 238 | .91 |
| 63000 | .80 | .20 | 40320 | 20160 | 2520  | .8011 | .1989 | 40283 | 20004 | 2483  | 40320 | 19931 | 2520  | 229 | .84 |
| 63000 | .85 | .15 | 45518 | 16065 | 1418  | .8512 | .1488 | 45490 | 15905 | 1390  | 45518 | 15851 | 1418  | 214 | .74 |
| 63000 | .90 | .10 | 51030 | 11340 | 630   | .9012 | .0988 | 51013 | 11185 | 613   | 51030 | 11151 | 630   | 189 | .57 |
| 63000 | .95 | .05 | 56858 | 5985  | 158   | .9510 | .0490 | 56851 | 5854  | 151   | 56858 | 5841  | 158   | 144 | .34 |
| 64000 | .05 | .95 | 160   | 6080  | 57760 | .0490 | .9510 | 153   | 5948  | 57753 | 160   | 5935  | 57760 | 145 | .34 |
| 64000 | .10 | .90 | 640   | 11520 | 51840 | .0988 | .9012 | 623   | 11364 | 51823 | 640   | 11330 | 51840 | 190 | .57 |
| 64000 | .15 | .85 | 1440  | 16320 | 46240 | .1488 | .8512 | 1413  | 16159 | 46213 | 1440  | 16104 | 46240 | 216 | .74 |
| 64000 | .20 | .80 | 2560  | 20480 | 40960 | .1989 | .8011 | 2523  | 20323 | 40923 | 2560  | 20249 | 40960 | 231 | .84 |
| 64000 | .25 | .75 | 4000  | 24000 | 36000 | .2491 | .7509 | 3955  | 23850 | 35955 | 4000  | 23760 | 36000 | 240 | .91 |
| 64000 | .30 | .70 | 5760  | 26880 | 31360 | .2992 | .7008 | 5709  | 26738 | 31309 | 5760  | 26635 | 31360 | 245 | .94 |
| 64000 | .35 | .65 | 7840  | 29120 | 27040 | .3494 | .6506 | 7784  | 28985 | 26984 | 7840  | 28873 | 27040 | 247 | .96 |
| 64000 | .40 | .60 | 10240 | 30720 | 23040 | .3996 | .6004 | 10181 | 30591 | 22981 | 10240 | 30472 | 23040 | 248 | .96 |
| 64000 | .45 | .55 | 12960 | 31680 | 19360 | .4498 | .5502 | 12899 | 31555 | 19299 | 12960 | 31432 | 19360 | 248 | .96 |
| 64000 | .50 | .50 | 16000 | 32000 | 16000 | .5000 | .5000 | 15938 | 31876 | 15938 | 16000 | 31752 | 16000 | 248 | .96 |
| 64000 | .55 | .45 | 19360 | 31680 | 12960 | .5502 | .4498 | 19299 | 31555 | 12899 | 19360 | 31432 | 12960 | 248 | .96 |
| 64000 | .60 | .40 | 23040 | 30720 | 10240 | .6004 | .3996 | 22981 | 30591 | 10181 | 23040 | 30472 | 10240 | 248 | .96 |
| 64000 | .65 | .35 | 27040 | 29120 | 7840  | .6506 | .3494 | 26984 | 28985 | 7784  | 27040 | 28873 | 7840  | 247 | .96 |
| 64000 | .70 | .30 | 31360 | 26880 | 5760  | .7008 | .2992 | 31309 | 26738 | 5709  | 31360 | 26635 | 5760  | 245 | .94 |
| 64000 | .75 | .25 | 36000 | 24000 | 4000  | .7509 | .2491 | 35955 | 23850 | 3955  | 36000 | 23760 | 4000  | 240 | .91 |

|       |     |     |       |       |       |       |       |       |       |       |       |       |       |     |     |
|-------|-----|-----|-------|-------|-------|-------|-------|-------|-------|-------|-------|-------|-------|-----|-----|
| 64000 | .80 | .20 | 40960 | 20480 | 2560  | .8011 | .1989 | 40923 | 20323 | 2523  | 40960 | 20249 | 2560  | 231 | .84 |
| 64000 | .85 | .15 | 46240 | 16320 | 1440  | .8512 | .1488 | 46213 | 16159 | 1413  | 46240 | 16104 | 1440  | 216 | .74 |
| 64000 | .90 | .10 | 51840 | 11520 | 640   | .9012 | .0988 | 51823 | 11364 | 623   | 51840 | 11330 | 640   | 190 | .57 |
| 64000 | .95 | .05 | 57760 | 6080  | 160   | .9510 | .0490 | 57753 | 5948  | 153   | 57760 | 5935  | 160   | 145 | .34 |
| 65000 | .05 | .95 | 163   | 6175  | 58663 | .0490 | .9510 | 156   | 6042  | 58656 | 163   | 6028  | 58663 | 147 | .34 |
| 65000 | .10 | .90 | 650   | 11700 | 52650 | .0988 | .9012 | 633   | 11542 | 52633 | 650   | 11508 | 52650 | 192 | .57 |
| 65000 | .15 | .85 | 1463  | 16575 | 46963 | .1488 | .8512 | 1435  | 16413 | 46935 | 1463  | 16357 | 46963 | 218 | .74 |
| 65000 | .20 | .80 | 2600  | 20800 | 41600 | .1989 | .8011 | 2563  | 20641 | 41563 | 2600  | 20567 | 41600 | 233 | .84 |
| 65000 | .25 | .75 | 4063  | 24375 | 36563 | .2491 | .7509 | 4017  | 24224 | 36517 | 4063  | 24133 | 36563 | 242 | .91 |
| 65000 | .30 | .70 | 5850  | 27300 | 31850 | .2992 | .7008 | 5798  | 27157 | 31798 | 5850  | 27053 | 31850 | 247 | .94 |
| 65000 | .35 | .65 | 7963  | 29575 | 27463 | .3494 | .6506 | 7906  | 29439 | 27406 | 7963  | 29326 | 27463 | 249 | .96 |
| 65000 | .40 | .60 | 10400 | 31200 | 23400 | .3996 | .6004 | 10340 | 31070 | 23340 | 10400 | 30950 | 23400 | 250 | .96 |
| 65000 | .45 | .55 | 13163 | 32175 | 19663 | .4498 | .5502 | 13101 | 32049 | 19601 | 13163 | 31925 | 19663 | 250 | .96 |
| 65000 | .50 | .50 | 16250 | 32500 | 16250 | .5000 | .5000 | 16188 | 32375 | 16188 | 16250 | 32250 | 16250 | 250 | .96 |
| 65000 | .55 | .45 | 19663 | 32175 | 13163 | .5502 | .4498 | 19601 | 32049 | 13101 | 19663 | 31925 | 13163 | 250 | .96 |
| 65000 | .60 | .40 | 23400 | 31200 | 10400 | .6004 | .3996 | 23340 | 31070 | 10340 | 23400 | 30950 | 10400 | 250 | .96 |
| 65000 | .65 | .35 | 27463 | 29575 | 7963  | .6506 | .3494 | 27406 | 29439 | 7906  | 27463 | 29326 | 7963  | 249 | .96 |
| 65000 | .70 | .30 | 31850 | 27300 | 5850  | .7008 | .2992 | 31798 | 27157 | 5798  | 31850 | 27053 | 5850  | 247 | .94 |
| 65000 | .75 | .25 | 36563 | 24375 | 4063  | .7509 | .2491 | 36517 | 24224 | 4017  | 36563 | 24133 | 4063  | 242 | .91 |
| 65000 | .80 | .20 | 41600 | 20800 | 2600  | .8011 | .1989 | 41563 | 20641 | 2563  | 41600 | 20567 | 2600  | 233 | .84 |
| 65000 | .85 | .15 | 46963 | 16575 | 1463  | .8512 | .1488 | 46935 | 16413 | 1435  | 46963 | 16357 | 1463  | 218 | .74 |
| 65000 | .90 | .10 | 52650 | 11700 | 650   | .9012 | .0988 | 52633 | 11542 | 633   | 52650 | 11508 | 650   | 192 | .57 |
| 65000 | .95 | .05 | 58663 | 6175  | 163   | .9510 | .0490 | 58656 | 6042  | 156   | 58663 | 6028  | 163   | 147 | .34 |
| 66000 | .05 | .95 | 165   | 6270  | 59565 | .0490 | .9510 | 158   | 6136  | 59558 | 165   | 6122  | 59565 | 148 | .34 |
| 66000 | .10 | .90 | 660   | 11880 | 53460 | .0988 | .9012 | 643   | 11721 | 53443 | 660   | 11687 | 53460 | 193 | .57 |
| 66000 | .15 | .85 | 1485  | 16830 | 47685 | .1488 | .8512 | 1457  | 16666 | 47657 | 1485  | 16611 | 47685 | 219 | .74 |
| 66000 | .20 | .80 | 2640  | 21120 | 42240 | .1989 | .8011 | 2602  | 20960 | 42202 | 2640  | 20885 | 42240 | 235 | .84 |
| 66000 | .25 | .75 | 4125  | 24750 | 37125 | .2491 | .7509 | 4079  | 24598 | 37079 | 4125  | 24506 | 37125 | 244 | .91 |
| 66000 | .30 | .70 | 5940  | 27720 | 32340 | .2992 | .7008 | 5888  | 27576 | 32288 | 5940  | 27471 | 32340 | 249 | .94 |
| 66000 | .35 | .65 | 8085  | 30030 | 27885 | .3494 | .6506 | 8028  | 29893 | 27828 | 8085  | 29779 | 27885 | 251 | .96 |
| 66000 | .40 | .60 | 10560 | 31680 | 23760 | .3996 | .6004 | 10500 | 31549 | 23700 | 10560 | 31428 | 23760 | 252 | .96 |
| 66000 | .45 | .55 | 13365 | 32670 | 19965 | .4498 | .5502 | 13303 | 32543 | 19903 | 13365 | 32418 | 19965 | 252 | .96 |
| 66000 | .50 | .50 | 16500 | 33000 | 16500 | .5000 | .5000 | 16437 | 32874 | 16437 | 16500 | 32748 | 16500 | 252 | .96 |

|       |     |     |       |       |       |       |       |       |       |       |       |       |       |     |     |
|-------|-----|-----|-------|-------|-------|-------|-------|-------|-------|-------|-------|-------|-------|-----|-----|
| 66000 | .55 | .45 | 19965 | 32670 | 13365 | .5502 | .4498 | 19903 | 32543 | 13303 | 19965 | 32418 | 13365 | 252 | .96 |
| 66000 | .60 | .40 | 23760 | 31680 | 10560 | .6004 | .3996 | 23700 | 31549 | 10500 | 23760 | 31428 | 10560 | 252 | .96 |
| 66000 | .65 | .35 | 27885 | 30030 | 8085  | .6506 | .3494 | 27828 | 29893 | 8028  | 27885 | 29779 | 8085  | 251 | .96 |
| 66000 | .70 | .30 | 32340 | 27720 | 5940  | .7008 | .2992 | 32288 | 27576 | 5888  | 32340 | 27471 | 5940  | 249 | .94 |
| 66000 | .75 | .25 | 37125 | 24750 | 4125  | .7509 | .2491 | 37079 | 24598 | 4079  | 37125 | 24506 | 4125  | 244 | .91 |
| 66000 | .80 | .20 | 42240 | 21120 | 2640  | .8011 | .1989 | 42202 | 20960 | 2602  | 42240 | 20885 | 2640  | 235 | .84 |
| 66000 | .85 | .15 | 47685 | 16830 | 1485  | .8512 | .1488 | 47657 | 16666 | 1457  | 47685 | 16611 | 1485  | 219 | .74 |
| 66000 | .90 | .10 | 53460 | 11880 | 660   | .9012 | .0988 | 53443 | 11721 | 643   | 53460 | 11687 | 660   | 193 | .57 |
| 66000 | .95 | .05 | 59565 | 6270  | 165   | .9510 | .0490 | 59558 | 6136  | 158   | 59565 | 6122  | 165   | 148 | .34 |
| 67000 | .05 | .95 | 168   | 6365  | 60468 | .0490 | .9510 | 161   | 6230  | 60461 | 168   | 6216  | 60468 | 149 | .34 |
| 67000 | .10 | .90 | 670   | 12060 | 54270 | .0988 | .9012 | 653   | 11900 | 54253 | 670   | 11865 | 54270 | 195 | .57 |
| 67000 | .15 | .85 | 1508  | 17085 | 48408 | .1488 | .8512 | 1479  | 16920 | 48379 | 1508  | 16864 | 48408 | 221 | .74 |
| 67000 | .20 | .80 | 2680  | 21440 | 42880 | .1989 | .8011 | 2642  | 21279 | 42842 | 2680  | 21203 | 42880 | 237 | .84 |
| 67000 | .25 | .75 | 4188  | 25125 | 37688 | .2491 | .7509 | 4142  | 24971 | 37642 | 4188  | 24879 | 37688 | 246 | .91 |
| 67000 | .30 | .70 | 6030  | 28140 | 32830 | .2992 | .7008 | 5977  | 27995 | 32777 | 6030  | 27890 | 32830 | 250 | .94 |
| 67000 | .35 | .65 | 8208  | 30485 | 28308 | .3494 | .6506 | 8150  | 30347 | 28250 | 8208  | 30232 | 28308 | 253 | .96 |
| 67000 | .40 | .60 | 10720 | 32160 | 24120 | .3996 | .6004 | 10659 | 32028 | 24059 | 10720 | 31907 | 24120 | 253 | .96 |
| 67000 | .45 | .55 | 13568 | 33165 | 20268 | .4498 | .5502 | 13505 | 33037 | 20205 | 13568 | 32911 | 20268 | 254 | .96 |
| 67000 | .50 | .50 | 16750 | 33500 | 16750 | .5000 | .5000 | 16687 | 33373 | 16687 | 16750 | 33246 | 16750 | 254 | .96 |
| 67000 | .55 | .45 | 20268 | 33165 | 13568 | .5502 | .4498 | 20205 | 33037 | 13505 | 20268 | 32911 | 13568 | 254 | .96 |
| 67000 | .60 | .40 | 24120 | 32160 | 10720 | .6004 | .3996 | 24059 | 32028 | 10659 | 24120 | 31907 | 10720 | 253 | .96 |
| 67000 | .65 | .35 | 28308 | 30485 | 8208  | .6506 | .3494 | 28250 | 30347 | 8150  | 28308 | 30232 | 8208  | 253 | .96 |
| 67000 | .70 | .30 | 32830 | 28140 | 6030  | .7008 | .2992 | 32777 | 27995 | 5977  | 32830 | 27890 | 6030  | 250 | .94 |
| 67000 | .75 | .25 | 37688 | 25125 | 4188  | .7509 | .2491 | 37642 | 24971 | 4142  | 37688 | 24879 | 4188  | 246 | .91 |
| 67000 | .80 | .20 | 42880 | 21440 | 2680  | .8011 | .1989 | 42842 | 21279 | 2642  | 42880 | 21203 | 2680  | 237 | .84 |
| 67000 | .85 | .15 | 48408 | 17085 | 1508  | .8512 | .1488 | 48379 | 16920 | 1479  | 48408 | 16864 | 1508  | 221 | .74 |
| 67000 | .90 | .10 | 54270 | 12060 | 670   | .9012 | .0988 | 54253 | 11900 | 653   | 54270 | 11865 | 670   | 195 | .57 |
| 67000 | .95 | .05 | 60468 | 6365  | 168   | .9510 | .0490 | 60461 | 6230  | 161   | 60468 | 6216  | 168   | 149 | .34 |
| 68000 | .05 | .95 | 170   | 6460  | 61370 | .0490 | .9510 | 163   | 6324  | 61363 | 170   | 6310  | 61370 | 150 | .34 |
| 68000 | .10 | .90 | 680   | 12240 | 55080 | .0988 | .9012 | 662   | 12079 | 55062 | 680   | 12044 | 55080 | 196 | .57 |
| 68000 | .15 | .85 | 1530  | 17340 | 49130 | .1488 | .8512 | 1502  | 17174 | 49102 | 1530  | 17117 | 49130 | 223 | .74 |
| 68000 | .20 | .80 | 2720  | 21760 | 43520 | .1989 | .8011 | 2682  | 21598 | 43482 | 2720  | 21522 | 43520 | 238 | .84 |
| 68000 | .25 | .75 | 4250  | 25500 | 38250 | .2491 | .7509 | 4204  | 25345 | 38204 | 4250  | 25253 | 38250 | 247 | .91 |

|       |     |     |       |       |       |       |       |       |       |       |       |       |       |     |     |
|-------|-----|-----|-------|-------|-------|-------|-------|-------|-------|-------|-------|-------|-------|-----|-----|
| 68000 | .30 | .70 | 6120  | 28560 | 33320 | .2993 | .7007 | 6067  | 28414 | 33267 | 6120  | 28308 | 33320 | 252 | .94 |
| 68000 | .35 | .65 | 8330  | 30940 | 28730 | .3494 | .6506 | 8272  | 30801 | 28672 | 8330  | 30685 | 28730 | 255 | .96 |
| 68000 | .40 | .60 | 10880 | 32640 | 24480 | .3996 | .6004 | 10819 | 32507 | 24419 | 10880 | 32385 | 24480 | 255 | .96 |
| 68000 | .45 | .55 | 13770 | 33660 | 20570 | .4498 | .5502 | 13707 | 33531 | 20507 | 13770 | 33404 | 20570 | 256 | .96 |
| 68000 | .50 | .50 | 17000 | 34000 | 17000 | .5000 | .5000 | 16936 | 33872 | 16936 | 17000 | 33744 | 17000 | 256 | .96 |
| 68000 | .55 | .45 | 20570 | 33660 | 13770 | .5502 | .4498 | 20507 | 33531 | 13707 | 20570 | 33404 | 13770 | 256 | .96 |
| 68000 | .60 | .40 | 24480 | 32640 | 10880 | .6004 | .3996 | 24419 | 32507 | 10819 | 24480 | 32385 | 10880 | 255 | .96 |
| 68000 | .65 | .35 | 28730 | 30940 | 8330  | .6506 | .3494 | 28672 | 30801 | 8272  | 28730 | 30685 | 8330  | 255 | .96 |
| 68000 | .70 | .30 | 33320 | 28560 | 6120  | .7007 | .2993 | 33267 | 28414 | 6067  | 33320 | 28308 | 6120  | 252 | .94 |
| 68000 | .75 | .25 | 38250 | 25500 | 4250  | .7509 | .2491 | 38204 | 25345 | 4204  | 38250 | 25253 | 4250  | 247 | .91 |
| 68000 | .80 | .20 | 43520 | 21760 | 2720  | .8011 | .1989 | 43482 | 21598 | 2682  | 43520 | 21522 | 2720  | 238 | .84 |
| 68000 | .85 | .15 | 49130 | 17340 | 1530  | .8512 | .1488 | 49102 | 17174 | 1502  | 49130 | 17117 | 1530  | 223 | .74 |
| 68000 | .90 | .10 | 55080 | 12240 | 680   | .9012 | .0988 | 55062 | 12079 | 662   | 55080 | 12044 | 680   | 196 | .57 |
| 68000 | .95 | .05 | 61370 | 6460  | 170   | .9510 | .0490 | 61363 | 6324  | 163   | 61370 | 6310  | 170   | 150 | .34 |
| 69000 | .05 | .95 | 173   | 6555  | 62273 | .0490 | .9510 | 165   | 6418  | 62265 | 173   | 6404  | 62273 | 151 | .34 |
| 69000 | .10 | .90 | 690   | 12420 | 55890 | .0989 | .9011 | 672   | 12258 | 55872 | 690   | 12222 | 55890 | 198 | .57 |
| 69000 | .15 | .85 | 1553  | 17595 | 49853 | .1489 | .8511 | 1524  | 17428 | 49824 | 1553  | 17371 | 49853 | 224 | .74 |
| 69000 | .20 | .80 | 2760  | 22080 | 44160 | .1990 | .8010 | 2722  | 21917 | 44122 | 2760  | 21840 | 44160 | 240 | .84 |
| 69000 | .25 | .75 | 4313  | 25875 | 38813 | .2491 | .7509 | 4266  | 25719 | 38766 | 4313  | 25626 | 38813 | 249 | .91 |
| 69000 | .30 | .70 | 6210  | 28980 | 33810 | .2993 | .7007 | 6157  | 28833 | 33757 | 6210  | 28726 | 33810 | 254 | .94 |
| 69000 | .35 | .65 | 8453  | 31395 | 29153 | .3494 | .6506 | 8394  | 31255 | 29094 | 8453  | 31139 | 29153 | 256 | .96 |
| 69000 | .40 | .60 | 11040 | 33120 | 24840 | .3996 | .6004 | 10978 | 32986 | 24778 | 11040 | 32863 | 24840 | 257 | .96 |
| 69000 | .45 | .55 | 13973 | 34155 | 20873 | .4498 | .5502 | 13909 | 34025 | 20809 | 13973 | 33898 | 20873 | 257 | .96 |
| 69000 | .50 | .50 | 17250 | 34500 | 17250 | .5000 | .5000 | 17186 | 34371 | 17186 | 17250 | 34243 | 17250 | 257 | .96 |
| 69000 | .55 | .45 | 20873 | 34155 | 13973 | .5502 | .4498 | 20809 | 34025 | 13909 | 20873 | 33898 | 13973 | 257 | .96 |
| 69000 | .60 | .40 | 24840 | 33120 | 11040 | .6004 | .3996 | 24778 | 32986 | 10978 | 24840 | 32863 | 11040 | 257 | .96 |
| 69000 | .65 | .35 | 29153 | 31395 | 8453  | .6506 | .3494 | 29094 | 31255 | 8394  | 29153 | 31139 | 8453  | 256 | .96 |
| 69000 | .70 | .30 | 33810 | 28980 | 6210  | .7007 | .2993 | 33757 | 28833 | 6157  | 33810 | 28726 | 6210  | 254 | .94 |
| 69000 | .75 | .25 | 38813 | 25875 | 4313  | .7509 | .2491 | 38766 | 25719 | 4266  | 38813 | 25626 | 4313  | 249 | .91 |
| 69000 | .80 | .20 | 44160 | 22080 | 2760  | .8010 | .1990 | 44122 | 21917 | 2722  | 44160 | 21840 | 2760  | 240 | .84 |
| 69000 | .85 | .15 | 49853 | 17595 | 1553  | .8511 | .1489 | 49824 | 17428 | 1524  | 49853 | 17371 | 1553  | 224 | .74 |
| 69000 | .90 | .10 | 55890 | 12420 | 690   | .9011 | .0989 | 55872 | 12258 | 672   | 55890 | 12222 | 690   | 198 | .57 |
| 69000 | .95 | .05 | 62273 | 6555  | 173   | .9510 | .0490 | 62265 | 6418  | 165   | 62273 | 6404  | 173   | 151 | .34 |



|       |     |     |       |       |       |       |       |       |       |       |       |       |       |     |     |
|-------|-----|-----|-------|-------|-------|-------|-------|-------|-------|-------|-------|-------|-------|-----|-----|
| 70000 | .05 | .95 | 175   | 6650  | 63175 | .0490 | .9510 | 168   | 6512  | 63168 | 175   | 6498  | 63175 | 152 | .34 |
| 70000 | .10 | .90 | 700   | 12600 | 56700 | .0989 | .9011 | 682   | 12436 | 56682 | 700   | 12401 | 56700 | 199 | .57 |
| 70000 | .15 | .85 | 1575  | 17850 | 50575 | .1489 | .8511 | 1546  | 17681 | 50546 | 1575  | 17624 | 50575 | 226 | .74 |
| 70000 | .20 | .80 | 2800  | 22400 | 44800 | .1990 | .8010 | 2761  | 22235 | 44761 | 2800  | 22158 | 44800 | 242 | .84 |
| 70000 | .25 | .75 | 4375  | 26250 | 39375 | .2491 | .7509 | 4328  | 26093 | 39328 | 4375  | 25999 | 39375 | 251 | .91 |
| 70000 | .30 | .70 | 6300  | 29400 | 34300 | .2993 | .7007 | 6246  | 29251 | 34246 | 6300  | 29144 | 34300 | 256 | .94 |
| 70000 | .35 | .65 | 8575  | 31850 | 29575 | .3494 | .6506 | 8516  | 31709 | 29516 | 8575  | 31592 | 29575 | 258 | .96 |
| 70000 | .40 | .60 | 11200 | 33600 | 25200 | .3996 | .6004 | 11138 | 33465 | 25138 | 11200 | 33341 | 25200 | 259 | .96 |
| 70000 | .45 | .55 | 14175 | 34650 | 21175 | .4498 | .5502 | 14111 | 34519 | 21111 | 14175 | 34391 | 21175 | 259 | .96 |
| 70000 | .50 | .50 | 17500 | 35000 | 17500 | .5000 | .5000 | 17435 | 34870 | 17435 | 17500 | 34741 | 17500 | 259 | .96 |
| 70000 | .55 | .45 | 21175 | 34650 | 14175 | .5502 | .4498 | 21111 | 34519 | 14111 | 21175 | 34391 | 14175 | 259 | .96 |
| 70000 | .60 | .40 | 25200 | 33600 | 11200 | .6004 | .3996 | 25138 | 33465 | 11138 | 25200 | 33341 | 11200 | 259 | .96 |
| 70000 | .65 | .35 | 29575 | 31850 | 8575  | .6506 | .3494 | 29516 | 31709 | 8516  | 29575 | 31592 | 8575  | 258 | .96 |
| 70000 | .70 | .30 | 34300 | 29400 | 6300  | .7007 | .2993 | 34246 | 29251 | 6246  | 34300 | 29144 | 6300  | 256 | .94 |
| 70000 | .75 | .25 | 39375 | 26250 | 4375  | .7509 | .2491 | 39328 | 26093 | 4328  | 39375 | 25999 | 4375  | 251 | .91 |
| 70000 | .80 | .20 | 44800 | 22400 | 2800  | .8010 | .1990 | 44761 | 22235 | 2761  | 44800 | 22158 | 2800  | 242 | .84 |
| 70000 | .85 | .15 | 50575 | 17850 | 1575  | .8511 | .1489 | 50546 | 17681 | 1546  | 50575 | 17624 | 1575  | 226 | .74 |
| 70000 | .90 | .10 | 56700 | 12600 | 700   | .9011 | .0989 | 56682 | 12436 | 682   | 56700 | 12401 | 700   | 199 | .57 |
| 70000 | .95 | .05 | 63175 | 6650  | 175   | .9510 | .0490 | 63168 | 6512  | 168   | 63175 | 6498  | 175   | 152 | .34 |
| 71000 | .05 | .95 | 178   | 6745  | 64078 | .0490 | .9510 | 170   | 6606  | 64070 | 178   | 6592  | 64078 | 153 | .34 |
| 71000 | .10 | .90 | 710   | 12780 | 57510 | .0989 | .9011 | 692   | 12615 | 57492 | 710   | 12579 | 57510 | 201 | .57 |
| 71000 | .15 | .85 | 1598  | 18105 | 51298 | .1489 | .8511 | 1569  | 17935 | 51269 | 1598  | 17877 | 51298 | 228 | .74 |
| 71000 | .20 | .80 | 2840  | 22720 | 45440 | .1990 | .8010 | 2801  | 22554 | 45401 | 2840  | 22476 | 45440 | 244 | .84 |
| 71000 | .25 | .75 | 4438  | 26625 | 39938 | .2491 | .7509 | 4390  | 26467 | 39890 | 4438  | 26372 | 39938 | 253 | .91 |
| 71000 | .30 | .70 | 6390  | 29820 | 34790 | .2993 | .7007 | 6336  | 29670 | 34736 | 6390  | 29562 | 34790 | 258 | .94 |
| 71000 | .35 | .65 | 8698  | 32305 | 29998 | .3494 | .6506 | 8638  | 32163 | 29938 | 8698  | 32045 | 29998 | 260 | .96 |
| 71000 | .40 | .60 | 11360 | 34080 | 25560 | .3996 | .6004 | 11297 | 33944 | 25497 | 11360 | 33819 | 25560 | 261 | .96 |
| 71000 | .45 | .55 | 14378 | 35145 | 21478 | .4498 | .5502 | 14313 | 35013 | 21413 | 14378 | 34884 | 21478 | 261 | .96 |
| 71000 | .50 | .50 | 17750 | 35500 | 17750 | .5000 | .5000 | 17685 | 35369 | 17685 | 17750 | 35239 | 17750 | 261 | .96 |
| 71000 | .55 | .45 | 21478 | 35145 | 14378 | .5502 | .4498 | 21413 | 35013 | 14313 | 21478 | 34884 | 14378 | 261 | .96 |
| 71000 | .60 | .40 | 25560 | 34080 | 11360 | .6004 | .3996 | 25497 | 33944 | 11297 | 25560 | 33819 | 11360 | 261 | .96 |
| 71000 | .65 | .35 | 29998 | 32305 | 8698  | .6506 | .3494 | 29938 | 32163 | 8638  | 29998 | 32045 | 8698  | 260 | .96 |
| 71000 | .70 | .30 | 34790 | 29820 | 6390  | .7007 | .2993 | 34736 | 29670 | 6336  | 34790 | 29562 | 6390  | 258 | .94 |

|       |     |     |       |       |       |       |       |       |       |       |       |       |       |     |     |
|-------|-----|-----|-------|-------|-------|-------|-------|-------|-------|-------|-------|-------|-------|-----|-----|
| 71000 | .75 | .25 | 39938 | 26625 | 4438  | .7509 | .2491 | 39890 | 26467 | 4390  | 39938 | 26372 | 4438  | 253 | .91 |
| 71000 | .80 | .20 | 45440 | 22720 | 2840  | .8010 | .1990 | 45401 | 22554 | 2801  | 45440 | 22476 | 2840  | 244 | .84 |
| 71000 | .85 | .15 | 51298 | 18105 | 1598  | .8511 | .1489 | 51269 | 17935 | 1569  | 51298 | 17877 | 1598  | 228 | .74 |
| 71000 | .90 | .10 | 57510 | 12780 | 710   | .9011 | .0989 | 57492 | 12615 | 692   | 57510 | 12579 | 710   | 201 | .57 |
| 71000 | .95 | .05 | 64078 | 6745  | 178   | .9510 | .0490 | 64070 | 6606  | 170   | 64078 | 6592  | 178   | 153 | .34 |
| 72000 | .05 | .95 | 180   | 6840  | 64980 | .0490 | .9510 | 173   | 6700  | 64973 | 180   | 6686  | 64980 | 154 | .34 |
| 72000 | .10 | .90 | 720   | 12960 | 58320 | .0989 | .9011 | 702   | 12794 | 58302 | 720   | 12758 | 58320 | 202 | .57 |
| 72000 | .15 | .85 | 1620  | 18360 | 52020 | .1489 | .8511 | 1591  | 18189 | 51991 | 1620  | 18131 | 52020 | 229 | .74 |
| 72000 | .20 | .80 | 2880  | 23040 | 46080 | .1990 | .8010 | 2841  | 22873 | 46041 | 2880  | 22795 | 46080 | 245 | .84 |
| 72000 | .25 | .75 | 4500  | 27000 | 40500 | .2491 | .7509 | 4452  | 26841 | 40452 | 4500  | 26745 | 40500 | 255 | .91 |
| 72000 | .30 | .70 | 6480  | 30240 | 35280 | .2993 | .7007 | 6426  | 30089 | 35226 | 6480  | 29980 | 35280 | 260 | .94 |
| 72000 | .35 | .65 | 8820  | 32760 | 30420 | .3495 | .6505 | 8760  | 32617 | 30360 | 8820  | 32498 | 30420 | 262 | .96 |
| 72000 | .40 | .60 | 11520 | 34560 | 25920 | .3996 | .6004 | 11457 | 34423 | 25857 | 11520 | 34297 | 25920 | 263 | .96 |
| 72000 | .45 | .55 | 14580 | 35640 | 21780 | .4498 | .5502 | 14515 | 35507 | 21715 | 14580 | 35377 | 21780 | 263 | .96 |
| 72000 | .50 | .50 | 18000 | 36000 | 18000 | .5000 | .5000 | 17934 | 35869 | 17934 | 18000 | 35737 | 18000 | 263 | .96 |
| 72000 | .55 | .45 | 21780 | 35640 | 14580 | .5502 | .4498 | 21715 | 35507 | 14515 | 21780 | 35377 | 14580 | 263 | .96 |
| 72000 | .60 | .40 | 25920 | 34560 | 11520 | .6004 | .3996 | 25857 | 34423 | 11457 | 25920 | 34297 | 11520 | 263 | .96 |
| 72000 | .65 | .35 | 30420 | 32760 | 8820  | .6505 | .3495 | 30360 | 32617 | 8760  | 30420 | 32498 | 8820  | 262 | .96 |
| 72000 | .70 | .30 | 35280 | 30240 | 6480  | .7007 | .2993 | 35226 | 30089 | 6426  | 35280 | 29980 | 6480  | 260 | .94 |
| 72000 | .75 | .25 | 40500 | 27000 | 4500  | .7509 | .2491 | 40452 | 26841 | 4452  | 40500 | 26745 | 4500  | 255 | .91 |
| 72000 | .80 | .20 | 46080 | 23040 | 2880  | .8010 | .1990 | 46041 | 22873 | 2841  | 46080 | 22795 | 2880  | 245 | .84 |
| 72000 | .85 | .15 | 52020 | 18360 | 1620  | .8511 | .1489 | 51991 | 18189 | 1591  | 52020 | 18131 | 1620  | 229 | .74 |
| 72000 | .90 | .10 | 58320 | 12960 | 720   | .9011 | .0989 | 58302 | 12794 | 702   | 58320 | 12758 | 720   | 202 | .57 |
| 72000 | .95 | .05 | 64980 | 6840  | 180   | .9510 | .0490 | 64973 | 6700  | 173   | 64980 | 6686  | 180   | 154 | .34 |
| 73000 | .05 | .95 | 183   | 6935  | 65883 | .0490 | .9510 | 175   | 6794  | 65875 | 183   | 6780  | 65883 | 155 | .34 |
| 73000 | .10 | .90 | 730   | 13140 | 59130 | .0989 | .9011 | 712   | 12973 | 59112 | 730   | 12937 | 59130 | 203 | .57 |
| 73000 | .15 | .85 | 1643  | 18615 | 52743 | .1489 | .8511 | 1613  | 18443 | 52713 | 1643  | 18384 | 52743 | 231 | .74 |
| 73000 | .20 | .80 | 2920  | 23360 | 46720 | .1990 | .8010 | 2881  | 23192 | 46681 | 2920  | 23113 | 46720 | 247 | .84 |
| 73000 | .25 | .75 | 4563  | 27375 | 41063 | .2491 | .7509 | 4514  | 27215 | 41014 | 4563  | 27119 | 41063 | 256 | .91 |
| 73000 | .30 | .70 | 6570  | 30660 | 35770 | .2993 | .7007 | 6515  | 30508 | 35715 | 6570  | 30399 | 35770 | 261 | .94 |
| 73000 | .35 | .65 | 8943  | 33215 | 30843 | .3495 | .6505 | 8883  | 33071 | 30783 | 8943  | 32951 | 30843 | 264 | .96 |
| 73000 | .40 | .60 | 11680 | 35040 | 26280 | .3996 | .6004 | 11617 | 34902 | 26217 | 11680 | 34775 | 26280 | 265 | .96 |
| 73000 | .45 | .55 | 14783 | 36135 | 22083 | .4498 | .5502 | 14717 | 36001 | 22017 | 14783 | 35870 | 22083 | 265 | .96 |

|       |     |     |       |       |       |       |       |       |       |       |       |       |       |     |     |
|-------|-----|-----|-------|-------|-------|-------|-------|-------|-------|-------|-------|-------|-------|-----|-----|
| 73000 | .50 | .50 | 18250 | 36500 | 18250 | .5000 | .5000 | 18184 | 36368 | 18184 | 18250 | 36235 | 18250 | 265 | .96 |
| 73000 | .55 | .45 | 22083 | 36135 | 14783 | .5502 | .4498 | 22017 | 36001 | 14717 | 22083 | 35870 | 14783 | 265 | .96 |
| 73000 | .60 | .40 | 26280 | 35040 | 11680 | .6004 | .3996 | 26217 | 34902 | 11617 | 26280 | 34775 | 11680 | 265 | .96 |
| 73000 | .65 | .35 | 30843 | 33215 | 8943  | .6505 | .3495 | 30783 | 33071 | 8883  | 30843 | 32951 | 8943  | 264 | .96 |
| 73000 | .70 | .30 | 35770 | 30660 | 6570  | .7007 | .2993 | 35715 | 30508 | 6515  | 35770 | 30399 | 6570  | 261 | .94 |
| 73000 | .75 | .25 | 41063 | 27375 | 4563  | .7509 | .2491 | 41014 | 27215 | 4514  | 41063 | 27119 | 4563  | 256 | .91 |
| 73000 | .80 | .20 | 46720 | 23360 | 2920  | .8010 | .1990 | 46681 | 23192 | 2881  | 46720 | 23113 | 2920  | 247 | .84 |
| 73000 | .85 | .15 | 52743 | 18615 | 1643  | .8511 | .1489 | 52713 | 18443 | 1613  | 52743 | 18384 | 1643  | 231 | .74 |
| 73000 | .90 | .10 | 59130 | 13140 | 730   | .9011 | .0989 | 59112 | 12973 | 712   | 59130 | 12937 | 730   | 203 | .57 |
| 73000 | .95 | .05 | 65883 | 6935  | 183   | .9510 | .0490 | 65875 | 6794  | 175   | 65883 | 6780  | 183   | 155 | .34 |
| 74000 | .05 | .95 | 185   | 7030  | 66785 | .0490 | .9510 | 178   | 6888  | 66778 | 185   | 6874  | 66785 | 156 | .34 |
| 74000 | .10 | .90 | 740   | 13320 | 59940 | .0989 | .9011 | 722   | 13152 | 59922 | 740   | 13115 | 59940 | 205 | .57 |
| 74000 | .15 | .85 | 1665  | 18870 | 53465 | .1489 | .8511 | 1635  | 18697 | 53435 | 1665  | 18638 | 53465 | 232 | .74 |
| 74000 | .20 | .80 | 2960  | 23680 | 47360 | .1990 | .8010 | 2920  | 23511 | 47320 | 2960  | 23431 | 47360 | 249 | .84 |
| 74000 | .25 | .75 | 4625  | 27750 | 41625 | .2491 | .7509 | 4577  | 27589 | 41577 | 4625  | 27492 | 41625 | 258 | .91 |
| 74000 | .30 | .70 | 6660  | 31080 | 36260 | .2993 | .7007 | 6605  | 30927 | 36205 | 6660  | 30817 | 36260 | 263 | .94 |
| 74000 | .35 | .65 | 9065  | 33670 | 31265 | .3495 | .6505 | 9005  | 33525 | 31205 | 9065  | 33404 | 31265 | 266 | .96 |
| 74000 | .40 | .60 | 11840 | 35520 | 26640 | .3996 | .6004 | 11776 | 35381 | 26576 | 11840 | 35254 | 26640 | 266 | .96 |
| 74000 | .45 | .55 | 14985 | 36630 | 22385 | .4498 | .5502 | 14919 | 36495 | 22319 | 14985 | 36363 | 22385 | 267 | .96 |
| 74000 | .50 | .50 | 18500 | 37000 | 18500 | .5000 | .5000 | 18433 | 36867 | 18433 | 18500 | 36733 | 18500 | 267 | .96 |
| 74000 | .55 | .45 | 22385 | 36630 | 14985 | .5502 | .4498 | 22319 | 36495 | 14919 | 22385 | 36363 | 14985 | 267 | .96 |
| 74000 | .60 | .40 | 26640 | 35520 | 11840 | .6004 | .3996 | 26576 | 35381 | 11776 | 26640 | 35254 | 11840 | 266 | .96 |
| 74000 | .65 | .35 | 31265 | 33670 | 9065  | .6505 | .3495 | 31205 | 33525 | 9005  | 31265 | 33404 | 9065  | 266 | .96 |
| 74000 | .70 | .30 | 36260 | 31080 | 6660  | .7007 | .2993 | 36205 | 30927 | 6605  | 36260 | 30817 | 6660  | 263 | .94 |
| 74000 | .75 | .25 | 41625 | 27750 | 4625  | .7509 | .2491 | 41577 | 27589 | 4577  | 41625 | 27492 | 4625  | 258 | .91 |
| 74000 | .80 | .20 | 47360 | 23680 | 2960  | .8010 | .1990 | 47320 | 23511 | 2920  | 47360 | 23431 | 2960  | 249 | .84 |
| 74000 | .85 | .15 | 53465 | 18870 | 1665  | .8511 | .1489 | 53435 | 18697 | 1635  | 53465 | 18638 | 1665  | 232 | .74 |
| 74000 | .90 | .10 | 59940 | 13320 | 740   | .9011 | .0989 | 59922 | 13152 | 722   | 59940 | 13115 | 740   | 205 | .57 |
| 74000 | .95 | .05 | 66785 | 7030  | 185   | .9510 | .0490 | 66778 | 6888  | 178   | 66785 | 6874  | 185   | 156 | .34 |
| 75000 | .05 | .95 | 188   | 7125  | 67688 | .0491 | .9509 | 180   | 6982  | 67680 | 188   | 6968  | 67688 | 157 | .34 |
| 75000 | .10 | .90 | 750   | 13500 | 60750 | .0989 | .9011 | 732   | 13331 | 60732 | 750   | 13294 | 60750 | 206 | .57 |
| 75000 | .15 | .85 | 1688  | 19125 | 54188 | .1489 | .8511 | 1658  | 18951 | 54158 | 1688  | 18891 | 54188 | 234 | .74 |
| 75000 | .20 | .80 | 3000  | 24000 | 48000 | .1990 | .8010 | 2960  | 23830 | 47960 | 3000  | 23750 | 48000 | 250 | .84 |

|       |     |     |       |       |       |       |       |       |       |       |       |       |       |     |     |
|-------|-----|-----|-------|-------|-------|-------|-------|-------|-------|-------|-------|-------|-------|-----|-----|
| 75000 | .25 | .75 | 4688  | 28125 | 42188 | .2491 | .7509 | 4639  | 27962 | 42139 | 4688  | 27865 | 42188 | 260 | .91 |
| 75000 | .30 | .70 | 6750  | 31500 | 36750 | .2993 | .7007 | 6694  | 31346 | 36694 | 6750  | 31235 | 36750 | 265 | .94 |
| 75000 | .35 | .65 | 9188  | 34125 | 31688 | .3495 | .6505 | 9127  | 33979 | 31627 | 9188  | 33858 | 31688 | 267 | .96 |
| 75000 | .40 | .60 | 12000 | 36000 | 27000 | .3996 | .6004 | 11936 | 35861 | 26936 | 12000 | 35732 | 27000 | 268 | .96 |
| 75000 | .45 | .55 | 15188 | 37125 | 22688 | .4498 | .5502 | 15121 | 36989 | 22621 | 15188 | 36857 | 22688 | 268 | .96 |
| 75000 | .50 | .50 | 18750 | 37500 | 18750 | .5000 | .5000 | 18683 | 37366 | 18683 | 18750 | 37232 | 18750 | 268 | .96 |
| 75000 | .55 | .45 | 22688 | 37125 | 15188 | .5502 | .4498 | 22621 | 36989 | 15121 | 22688 | 36857 | 15188 | 268 | .96 |
| 75000 | .60 | .40 | 27000 | 36000 | 12000 | .6004 | .3996 | 26936 | 35861 | 11936 | 27000 | 35732 | 12000 | 268 | .96 |
| 75000 | .65 | .35 | 31688 | 34125 | 9188  | .6505 | .3495 | 31627 | 33979 | 9127  | 31688 | 33858 | 9188  | 267 | .96 |
| 75000 | .70 | .30 | 36750 | 31500 | 6750  | .7007 | .2993 | 36694 | 31346 | 6694  | 36750 | 31235 | 6750  | 265 | .94 |
| 75000 | .75 | .25 | 42188 | 28125 | 4688  | .7509 | .2491 | 42139 | 27962 | 4639  | 42188 | 27865 | 4688  | 260 | .91 |
| 75000 | .80 | .20 | 48000 | 24000 | 3000  | .8010 | .1990 | 47960 | 23830 | 2960  | 48000 | 23750 | 3000  | 250 | .84 |
| 75000 | .85 | .15 | 54188 | 19125 | 1688  | .8511 | .1489 | 54158 | 18951 | 1658  | 54188 | 18891 | 1688  | 234 | .74 |
| 75000 | .90 | .10 | 60750 | 13500 | 750   | .9011 | .0989 | 60732 | 13331 | 732   | 60750 | 13294 | 750   | 206 | .57 |
| 75000 | .95 | .05 | 67688 | 7125  | 188   | .9509 | .0491 | 67680 | 6982  | 180   | 67688 | 6968  | 188   | 157 | .34 |
| 76000 | .05 | .95 | 190   | 7220  | 68590 | .0491 | .9509 | 183   | 7076  | 68583 | 190   | 7062  | 68590 | 158 | .34 |
| 76000 | .10 | .90 | 760   | 13680 | 61560 | .0989 | .9011 | 741   | 13510 | 61541 | 760   | 13472 | 61560 | 208 | .57 |
| 76000 | .15 | .85 | 1710  | 19380 | 54910 | .1489 | .8511 | 1680  | 19204 | 54880 | 1710  | 19144 | 54910 | 236 | .74 |
| 76000 | .20 | .80 | 3040  | 24320 | 48640 | .1990 | .8010 | 3000  | 24148 | 48600 | 3040  | 24068 | 48640 | 252 | .84 |
| 76000 | .25 | .75 | 4750  | 28500 | 42750 | .2491 | .7509 | 4701  | 28336 | 42701 | 4750  | 28238 | 42750 | 262 | .91 |
| 76000 | .30 | .70 | 6840  | 31920 | 37240 | .2993 | .7007 | 6784  | 31765 | 37184 | 6840  | 31653 | 37240 | 267 | .94 |
| 76000 | .35 | .65 | 9310  | 34580 | 32110 | .3495 | .6505 | 9249  | 34433 | 32049 | 9310  | 34311 | 32110 | 269 | .96 |
| 76000 | .40 | .60 | 12160 | 36480 | 27360 | .3996 | .6004 | 12095 | 36340 | 27295 | 12160 | 36210 | 27360 | 270 | .96 |
| 76000 | .45 | .55 | 15390 | 37620 | 22990 | .4498 | .5502 | 15323 | 37484 | 22923 | 15390 | 37350 | 22990 | 270 | .96 |
| 76000 | .50 | .50 | 19000 | 38000 | 19000 | .5000 | .5000 | 18932 | 37865 | 18932 | 19000 | 37730 | 19000 | 270 | .96 |
| 76000 | .55 | .45 | 22990 | 37620 | 15390 | .5502 | .4498 | 22923 | 37484 | 15323 | 22990 | 37350 | 15390 | 270 | .96 |
| 76000 | .60 | .40 | 27360 | 36480 | 12160 | .6004 | .3996 | 27295 | 36340 | 12095 | 27360 | 36210 | 12160 | 270 | .96 |
| 76000 | .65 | .35 | 32110 | 34580 | 9310  | .6505 | .3495 | 32049 | 34433 | 9249  | 32110 | 34311 | 9310  | 269 | .96 |
| 76000 | .70 | .30 | 37240 | 31920 | 6840  | .7007 | .2993 | 37184 | 31765 | 6784  | 37240 | 31653 | 6840  | 267 | .94 |
| 76000 | .75 | .25 | 42750 | 28500 | 4750  | .7509 | .2491 | 42701 | 28336 | 4701  | 42750 | 28238 | 4750  | 262 | .91 |
| 76000 | .80 | .20 | 48640 | 24320 | 3040  | .8010 | .1990 | 48600 | 24148 | 3000  | 48640 | 24068 | 3040  | 252 | .84 |
| 76000 | .85 | .15 | 54910 | 19380 | 1710  | .8511 | .1489 | 54880 | 19204 | 1680  | 54910 | 19144 | 1710  | 236 | .74 |
| 76000 | .90 | .10 | 61560 | 13680 | 760   | .9011 | .0989 | 61541 | 13510 | 741   | 61560 | 13472 | 760   | 208 | .57 |

|       |     |     |       |       |       |       |       |       |       |       |       |       |       |     |     |
|-------|-----|-----|-------|-------|-------|-------|-------|-------|-------|-------|-------|-------|-------|-----|-----|
| 76000 | .95 | .05 | 68590 | 7220  | 190   | .9509 | .0491 | 68583 | 7076  | 183   | 68590 | 7062  | 190   | 158 | .34 |
| 77000 | .05 | .95 | 193   | 7315  | 69493 | .0491 | .9509 | 185   | 7171  | 69485 | 193   | 7156  | 69493 | 159 | .34 |
| 77000 | .10 | .90 | 770   | 13860 | 62370 | .0989 | .9011 | 751   | 13688 | 62351 | 770   | 13651 | 62370 | 209 | .57 |
| 77000 | .15 | .85 | 1733  | 19635 | 55633 | .1489 | .8511 | 1702  | 19458 | 55602 | 1733  | 19398 | 55633 | 237 | .74 |
| 77000 | .20 | .80 | 3080  | 24640 | 49280 | .1990 | .8010 | 3039  | 24467 | 49239 | 3080  | 24386 | 49280 | 254 | .84 |
| 77000 | .25 | .75 | 4813  | 28875 | 43313 | .2491 | .7509 | 4763  | 28710 | 43263 | 4813  | 28612 | 43313 | 263 | .91 |
| 77000 | .30 | .70 | 6930  | 32340 | 37730 | .2993 | .7007 | 6874  | 32184 | 37674 | 6930  | 32072 | 37730 | 268 | .94 |
| 77000 | .35 | .65 | 9433  | 35035 | 32533 | .3495 | .6505 | 9371  | 34887 | 32471 | 9433  | 34764 | 32533 | 271 | .96 |
| 77000 | .40 | .60 | 12320 | 36960 | 27720 | .3996 | .6004 | 12255 | 36819 | 27655 | 12320 | 36688 | 27720 | 272 | .96 |
| 77000 | .45 | .55 | 15593 | 38115 | 23293 | .4498 | .5502 | 15525 | 37978 | 23225 | 15593 | 37843 | 23293 | 272 | .96 |
| 77000 | .50 | .50 | 19250 | 38500 | 19250 | .5000 | .5000 | 19182 | 38364 | 19182 | 19250 | 38228 | 19250 | 272 | .96 |
| 77000 | .55 | .45 | 23293 | 38115 | 15593 | .5502 | .4498 | 23225 | 37978 | 15525 | 23293 | 37843 | 15593 | 272 | .96 |
| 77000 | .60 | .40 | 27720 | 36960 | 12320 | .6004 | .3996 | 27655 | 36819 | 12255 | 27720 | 36688 | 12320 | 272 | .96 |
| 77000 | .65 | .35 | 32533 | 35035 | 9433  | .6505 | .3495 | 32471 | 34887 | 9371  | 32533 | 34764 | 9433  | 271 | .96 |
| 77000 | .70 | .30 | 37730 | 32340 | 6930  | .7007 | .2993 | 37674 | 32184 | 6874  | 37730 | 32072 | 6930  | 268 | .94 |
| 77000 | .75 | .25 | 43313 | 28875 | 4813  | .7509 | .2491 | 43263 | 28710 | 4763  | 43313 | 28612 | 4813  | 263 | .91 |
| 77000 | .80 | .20 | 49280 | 24640 | 3080  | .8010 | .1990 | 49239 | 24467 | 3039  | 49280 | 24386 | 3080  | 254 | .84 |
| 77000 | .85 | .15 | 55633 | 19635 | 1733  | .8511 | .1489 | 55602 | 19458 | 1702  | 55633 | 19398 | 1733  | 237 | .74 |
| 77000 | .90 | .10 | 62370 | 13860 | 770   | .9011 | .0989 | 62351 | 13688 | 751   | 62370 | 13651 | 770   | 209 | .57 |
| 77000 | .95 | .05 | 69493 | 7315  | 193   | .9509 | .0491 | 69485 | 7171  | 185   | 69493 | 7156  | 193   | 159 | .34 |
| 78000 | .05 | .95 | 195   | 7410  | 70395 | .0491 | .9509 | 187   | 7265  | 70387 | 195   | 7249  | 70395 | 161 | .34 |
| 78000 | .10 | .90 | 780   | 14040 | 63180 | .0989 | .9011 | 761   | 13867 | 63161 | 780   | 13830 | 63180 | 210 | .57 |
| 78000 | .15 | .85 | 1755  | 19890 | 56355 | .1489 | .8511 | 1725  | 19712 | 56325 | 1755  | 19651 | 56355 | 239 | .74 |
| 78000 | .20 | .80 | 3120  | 24960 | 49920 | .1990 | .8010 | 3079  | 24786 | 49879 | 3120  | 24705 | 49920 | 255 | .84 |
| 78000 | .25 | .75 | 4875  | 29250 | 43875 | .2491 | .7509 | 4825  | 29084 | 43825 | 4875  | 28985 | 43875 | 265 | .91 |
| 78000 | .30 | .70 | 7020  | 32760 | 38220 | .2993 | .7007 | 6963  | 32603 | 38163 | 7020  | 32490 | 38220 | 270 | .94 |
| 78000 | .35 | .65 | 9555  | 35490 | 32955 | .3495 | .6505 | 9493  | 35341 | 32893 | 9555  | 35217 | 32955 | 273 | .96 |
| 78000 | .40 | .60 | 12480 | 37440 | 28080 | .3996 | .6004 | 12414 | 37298 | 28014 | 12480 | 37167 | 28080 | 273 | .96 |
| 78000 | .45 | .55 | 15795 | 38610 | 23595 | .4498 | .5502 | 15727 | 38472 | 23527 | 15795 | 38336 | 23595 | 274 | .96 |
| 78000 | .50 | .50 | 19500 | 39000 | 19500 | .5000 | .5000 | 19432 | 38863 | 19432 | 19500 | 38726 | 19500 | 274 | .96 |
| 78000 | .55 | .45 | 23595 | 38610 | 15795 | .5502 | .4498 | 23527 | 38472 | 15727 | 23595 | 38336 | 15795 | 274 | .96 |
| 78000 | .60 | .40 | 28080 | 37440 | 12480 | .6004 | .3996 | 28014 | 37298 | 12414 | 28080 | 37167 | 12480 | 273 | .96 |
| 78000 | .65 | .35 | 32955 | 35490 | 9555  | .6505 | .3495 | 32893 | 35341 | 9493  | 32955 | 35217 | 9555  | 273 | .96 |

|       |     |     |       |       |       |       |       |       |       |       |       |       |       |     |     |
|-------|-----|-----|-------|-------|-------|-------|-------|-------|-------|-------|-------|-------|-------|-----|-----|
| 78000 | .70 | .30 | 38220 | 32760 | 7020  | .7007 | .2993 | 38163 | 32603 | 6963  | 38220 | 32490 | 7020  | 270 | .94 |
| 78000 | .75 | .25 | 43875 | 29250 | 4875  | .7509 | .2491 | 43825 | 29084 | 4825  | 43875 | 28985 | 4875  | 265 | .91 |
| 78000 | .80 | .20 | 49920 | 24960 | 3120  | .8010 | .1990 | 49879 | 24786 | 3079  | 49920 | 24705 | 3120  | 255 | .84 |
| 78000 | .85 | .15 | 56355 | 19890 | 1755  | .8511 | .1489 | 56325 | 19712 | 1725  | 56355 | 19651 | 1755  | 239 | .74 |
| 78000 | .90 | .10 | 63180 | 14040 | 780   | .9011 | .0989 | 63161 | 13867 | 761   | 63180 | 13830 | 780   | 210 | .57 |
| 78000 | .95 | .05 | 70395 | 7410  | 195   | .9509 | .0491 | 70387 | 7265  | 187   | 70395 | 7249  | 195   | 161 | .34 |
| 79000 | .05 | .95 | 198   | 7505  | 71298 | .0491 | .9509 | 190   | 7359  | 71290 | 198   | 7343  | 71298 | 162 | .34 |
| 79000 | .10 | .90 | 790   | 14220 | 63990 | .0989 | .9011 | 771   | 14046 | 63971 | 790   | 14008 | 63990 | 212 | .57 |
| 79000 | .15 | .85 | 1778  | 20145 | 57078 | .1489 | .8511 | 1747  | 19966 | 57047 | 1778  | 19905 | 57078 | 240 | .74 |
| 79000 | .20 | .80 | 3160  | 25280 | 50560 | .1990 | .8010 | 3119  | 25105 | 50519 | 3160  | 25023 | 50560 | 257 | .84 |
| 79000 | .25 | .75 | 4938  | 29625 | 44438 | .2492 | .7508 | 4888  | 29458 | 44388 | 4938  | 29358 | 44438 | 267 | .91 |
| 79000 | .30 | .70 | 7110  | 33180 | 38710 | .2993 | .7007 | 7053  | 33022 | 38653 | 7110  | 32908 | 38710 | 272 | .94 |
| 79000 | .35 | .65 | 9678  | 35945 | 33378 | .3495 | .6505 | 9615  | 35795 | 33315 | 9678  | 35671 | 33378 | 274 | .96 |
| 79000 | .40 | .60 | 12640 | 37920 | 28440 | .3997 | .6003 | 12574 | 37777 | 28374 | 12640 | 37645 | 28440 | 275 | .96 |
| 79000 | .45 | .55 | 15998 | 39105 | 23898 | .4498 | .5502 | 15929 | 38966 | 23829 | 15998 | 38830 | 23898 | 275 | .96 |
| 79000 | .50 | .50 | 19750 | 39500 | 19750 | .5000 | .5000 | 19681 | 39362 | 19681 | 19750 | 39225 | 19750 | 275 | .96 |
| 79000 | .55 | .45 | 23898 | 39105 | 15998 | .5502 | .4498 | 23829 | 38966 | 15929 | 23898 | 38830 | 15998 | 275 | .96 |
| 79000 | .60 | .40 | 28440 | 37920 | 12640 | .6003 | .3997 | 28374 | 37777 | 12574 | 28440 | 37645 | 12640 | 275 | .96 |
| 79000 | .65 | .35 | 33378 | 35945 | 9678  | .6505 | .3495 | 33315 | 35795 | 9615  | 33378 | 35671 | 9678  | 274 | .96 |
| 79000 | .70 | .30 | 38710 | 33180 | 7110  | .7007 | .2993 | 38653 | 33022 | 7053  | 38710 | 32908 | 7110  | 272 | .94 |
| 79000 | .75 | .25 | 44438 | 29625 | 4938  | .7508 | .2492 | 44388 | 29458 | 4888  | 44438 | 29358 | 4938  | 267 | .91 |
| 79000 | .80 | .20 | 50560 | 25280 | 3160  | .8010 | .1990 | 50519 | 25105 | 3119  | 50560 | 25023 | 3160  | 257 | .84 |
| 79000 | .85 | .15 | 57078 | 20145 | 1778  | .8511 | .1489 | 57047 | 19966 | 1747  | 57078 | 19905 | 1778  | 240 | .74 |
| 79000 | .90 | .10 | 63990 | 14220 | 790   | .9011 | .0989 | 63971 | 14046 | 771   | 63990 | 14008 | 790   | 212 | .57 |
| 79000 | .95 | .05 | 71298 | 7505  | 198   | .9509 | .0491 | 71290 | 7359  | 190   | 71298 | 7343  | 198   | 162 | .34 |
| 80000 | .05 | .95 | 200   | 7600  | 72200 | .0491 | .9509 | 192   | 7453  | 72192 | 200   | 7437  | 72200 | 163 | .34 |
| 80000 | .10 | .90 | 800   | 14400 | 64800 | .0989 | .9011 | 781   | 14225 | 64781 | 800   | 14187 | 64800 | 213 | .57 |
| 80000 | .15 | .85 | 1800  | 20400 | 57800 | .1489 | .8511 | 1769  | 20220 | 57769 | 1800  | 20158 | 57800 | 242 | .74 |
| 80000 | .20 | .80 | 3200  | 25600 | 51200 | .1990 | .8010 | 3159  | 25424 | 51159 | 3200  | 25341 | 51200 | 259 | .84 |
| 80000 | .25 | .75 | 5000  | 30000 | 45000 | .2492 | .7508 | 4950  | 29832 | 44950 | 5000  | 29732 | 45000 | 268 | .91 |
| 80000 | .30 | .70 | 7200  | 33600 | 39200 | .2993 | .7007 | 7143  | 33441 | 39143 | 7200  | 33326 | 39200 | 274 | .94 |
| 80000 | .35 | .65 | 9800  | 36400 | 33800 | .3495 | .6505 | 9737  | 36250 | 33737 | 9800  | 36124 | 33800 | 276 | .96 |
| 80000 | .40 | .60 | 12800 | 38400 | 28800 | .3997 | .6003 | 12734 | 38256 | 28734 | 12800 | 38123 | 28800 | 277 | .96 |

|       |     |     |       |       |       |       |       |       |       |       |       |       |       |     |     |
|-------|-----|-----|-------|-------|-------|-------|-------|-------|-------|-------|-------|-------|-------|-----|-----|
| 80000 | .45 | .55 | 16200 | 39600 | 24200 | .4498 | .5502 | 16131 | 39460 | 24131 | 16200 | 39323 | 24200 | 277 | .96 |
| 80000 | .50 | .50 | 20000 | 40000 | 20000 | .5000 | .5000 | 19931 | 39861 | 19931 | 20000 | 39723 | 20000 | 277 | .96 |
| 80000 | .55 | .45 | 24200 | 39600 | 16200 | .5502 | .4498 | 24131 | 39460 | 16131 | 24200 | 39323 | 16200 | 277 | .96 |
| 80000 | .60 | .40 | 28800 | 38400 | 12800 | .6003 | .3997 | 28734 | 38256 | 12734 | 28800 | 38123 | 12800 | 277 | .96 |
| 80000 | .65 | .35 | 33800 | 36400 | 9800  | .6505 | .3495 | 33737 | 36250 | 9737  | 33800 | 36124 | 9800  | 276 | .96 |
| 80000 | .70 | .30 | 39200 | 33600 | 7200  | .7007 | .2993 | 39143 | 33441 | 7143  | 39200 | 33326 | 7200  | 274 | .94 |
| 80000 | .75 | .25 | 45000 | 30000 | 5000  | .7508 | .2492 | 44950 | 29832 | 4950  | 45000 | 29732 | 5000  | 268 | .91 |
| 80000 | .80 | .20 | 51200 | 25600 | 3200  | .8010 | .1990 | 51159 | 25424 | 3159  | 51200 | 25341 | 3200  | 259 | .84 |
| 80000 | .85 | .15 | 57800 | 20400 | 1800  | .8511 | .1489 | 57769 | 20220 | 1769  | 57800 | 20158 | 1800  | 242 | .74 |
| 80000 | .90 | .10 | 64800 | 14400 | 800   | .9011 | .0989 | 64781 | 14225 | 781   | 64800 | 14187 | 800   | 213 | .57 |
| 80000 | .95 | .05 | 72200 | 7600  | 200   | .9509 | .0491 | 72192 | 7453  | 192   | 72200 | 7437  | 200   | 163 | .34 |
| 81000 | .05 | .95 | 203   | 7695  | 73103 | .0491 | .9509 | 195   | 7547  | 73095 | 203   | 7531  | 73103 | 164 | .34 |
| 81000 | .10 | .90 | 810   | 14580 | 65610 | .0989 | .9011 | 791   | 14404 | 65591 | 810   | 14366 | 65610 | 214 | .57 |
| 81000 | .15 | .85 | 1823  | 20655 | 58523 | .1489 | .8511 | 1792  | 20474 | 58492 | 1823  | 20412 | 58523 | 243 | .74 |
| 81000 | .20 | .80 | 3240  | 25920 | 51840 | .1990 | .8010 | 3198  | 25743 | 51798 | 3240  | 25660 | 51840 | 260 | .84 |
| 81000 | .25 | .75 | 5063  | 30375 | 45563 | .2492 | .7508 | 5012  | 30206 | 45512 | 5063  | 30105 | 45563 | 270 | .91 |
| 81000 | .30 | .70 | 7290  | 34020 | 39690 | .2993 | .7007 | 7232  | 33860 | 39632 | 7290  | 33745 | 39690 | 275 | .94 |
| 81000 | .35 | .65 | 9923  | 36855 | 34223 | .3495 | .6505 | 9859  | 36704 | 34159 | 9923  | 36577 | 34223 | 278 | .96 |
| 81000 | .40 | .60 | 12960 | 38880 | 29160 | .3997 | .6003 | 12893 | 38735 | 29093 | 12960 | 38601 | 29160 | 279 | .96 |
| 81000 | .45 | .55 | 16403 | 40095 | 24503 | .4498 | .5502 | 16333 | 39954 | 24433 | 16403 | 39816 | 24503 | 279 | .96 |
| 81000 | .50 | .50 | 20250 | 40500 | 20250 | .5000 | .5000 | 20180 | 40361 | 20180 | 20250 | 40221 | 20250 | 279 | .96 |
| 81000 | .55 | .45 | 24503 | 40095 | 16403 | .5502 | .4498 | 24433 | 39954 | 16333 | 24503 | 39816 | 16403 | 279 | .96 |
| 81000 | .60 | .40 | 29160 | 38880 | 12960 | .6003 | .3997 | 29093 | 38735 | 12893 | 29160 | 38601 | 12960 | 279 | .96 |
| 81000 | .65 | .35 | 34223 | 36855 | 9923  | .6505 | .3495 | 34159 | 36704 | 9859  | 34223 | 36577 | 9923  | 278 | .96 |
| 81000 | .70 | .30 | 39690 | 34020 | 7290  | .7007 | .2993 | 39632 | 33860 | 7232  | 39690 | 33745 | 7290  | 275 | .94 |
| 81000 | .75 | .25 | 45563 | 30375 | 5063  | .7508 | .2492 | 45512 | 30206 | 5012  | 45563 | 30105 | 5063  | 270 | .91 |
| 81000 | .80 | .20 | 51840 | 25920 | 3240  | .8010 | .1990 | 51798 | 25743 | 3198  | 51840 | 25660 | 3240  | 260 | .84 |
| 81000 | .85 | .15 | 58523 | 20655 | 1823  | .8511 | .1489 | 58492 | 20474 | 1792  | 58523 | 20412 | 1823  | 243 | .74 |
| 81000 | .90 | .10 | 65610 | 14580 | 810   | .9011 | .0989 | 65591 | 14404 | 791   | 65610 | 14366 | 810   | 214 | .57 |
| 81000 | .95 | .05 | 73103 | 7695  | 203   | .9509 | .0491 | 73095 | 7547  | 195   | 73103 | 7531  | 203   | 164 | .34 |
| 82000 | .05 | .95 | 205   | 7790  | 74005 | .0491 | .9509 | 197   | 7641  | 73997 | 205   | 7625  | 74005 | 165 | .34 |
| 82000 | .10 | .90 | 820   | 14760 | 66420 | .0989 | .9011 | 801   | 14583 | 66401 | 820   | 14544 | 66420 | 216 | .57 |
| 82000 | .15 | .85 | 1845  | 20910 | 59245 | .1490 | .8510 | 1814  | 20728 | 59214 | 1845  | 20665 | 59245 | 245 | .74 |

|       |     |     |       |       |       |       |       |       |       |       |       |       |       |     |     |
|-------|-----|-----|-------|-------|-------|-------|-------|-------|-------|-------|-------|-------|-------|-----|-----|
| 82000 | .20 | .80 | 3280  | 26240 | 52480 | .1990 | .8010 | 3238  | 26062 | 52438 | 3280  | 25978 | 52480 | 262 | .84 |
| 82000 | .25 | .75 | 5125  | 30750 | 46125 | .2492 | .7508 | 5074  | 30580 | 46074 | 5125  | 30478 | 46125 | 272 | .91 |
| 82000 | .30 | .70 | 7380  | 34440 | 40180 | .2993 | .7007 | 7322  | 34279 | 40122 | 7380  | 34163 | 40180 | 277 | .94 |
| 82000 | .35 | .65 | 10045 | 37310 | 34645 | .3495 | .6505 | 9981  | 37158 | 34581 | 10045 | 37031 | 34645 | 279 | .96 |
| 82000 | .40 | .60 | 13120 | 39360 | 29520 | .3997 | .6003 | 13053 | 39214 | 29453 | 13120 | 39080 | 29520 | 280 | .96 |
| 82000 | .45 | .55 | 16605 | 40590 | 24805 | .4498 | .5502 | 16536 | 40448 | 24736 | 16605 | 40309 | 24805 | 281 | .96 |
| 82000 | .50 | .50 | 20500 | 41000 | 20500 | .5000 | .5000 | 20430 | 40860 | 20430 | 20500 | 40719 | 20500 | 281 | .96 |
| 82000 | .55 | .45 | 24805 | 40590 | 16605 | .5502 | .4498 | 24736 | 40448 | 16536 | 24805 | 40309 | 16605 | 281 | .96 |
| 82000 | .60 | .40 | 29520 | 39360 | 13120 | .6003 | .3997 | 29453 | 39214 | 13053 | 29520 | 39080 | 13120 | 280 | .96 |
| 82000 | .65 | .35 | 34645 | 37310 | 10045 | .6505 | .3495 | 34581 | 37158 | 9981  | 34645 | 37031 | 10045 | 279 | .96 |
| 82000 | .70 | .30 | 40180 | 34440 | 7380  | .7007 | .2993 | 40122 | 34279 | 7322  | 40180 | 34163 | 7380  | 277 | .94 |
| 82000 | .75 | .25 | 46125 | 30750 | 5125  | .7508 | .2492 | 46074 | 30580 | 5074  | 46125 | 30478 | 5125  | 272 | .91 |
| 82000 | .80 | .20 | 52480 | 26240 | 3280  | .8010 | .1990 | 52438 | 26062 | 3238  | 52480 | 25978 | 3280  | 262 | .84 |
| 82000 | .85 | .15 | 59245 | 20910 | 1845  | .8510 | .1490 | 59214 | 20728 | 1814  | 59245 | 20665 | 1845  | 245 | .74 |
| 82000 | .90 | .10 | 66420 | 14760 | 820   | .9011 | .0989 | 66401 | 14583 | 801   | 66420 | 14544 | 820   | 216 | .57 |
| 82000 | .95 | .05 | 74005 | 7790  | 205   | .9509 | .0491 | 73997 | 7641  | 197   | 74005 | 7625  | 205   | 165 | .34 |
| 83000 | .05 | .95 | 208   | 7885  | 74908 | .0491 | .9509 | 200   | 7735  | 74900 | 208   | 7719  | 74908 | 166 | .34 |
| 83000 | .10 | .90 | 830   | 14940 | 67230 | .0990 | .9010 | 811   | 14762 | 67211 | 830   | 14723 | 67230 | 217 | .57 |
| 83000 | .15 | .85 | 1868  | 21165 | 59968 | .1490 | .8510 | 1836  | 20981 | 59936 | 1868  | 20919 | 59968 | 246 | .74 |
| 83000 | .20 | .80 | 3320  | 26560 | 53120 | .1990 | .8010 | 3278  | 26381 | 53078 | 3320  | 26297 | 53120 | 263 | .84 |
| 83000 | .25 | .75 | 5188  | 31125 | 46688 | .2492 | .7508 | 5136  | 30954 | 46636 | 5188  | 30852 | 46688 | 273 | .91 |
| 83000 | .30 | .70 | 7470  | 34860 | 40670 | .2993 | .7007 | 7412  | 34698 | 40612 | 7470  | 34581 | 40670 | 279 | .94 |
| 83000 | .35 | .65 | 10168 | 37765 | 35068 | .3495 | .6505 | 10104 | 37612 | 35004 | 10168 | 37484 | 35068 | 281 | .96 |
| 83000 | .40 | .60 | 13280 | 39840 | 29880 | .3997 | .6003 | 13212 | 39693 | 29812 | 13280 | 39558 | 29880 | 282 | .96 |
| 83000 | .45 | .55 | 16808 | 41085 | 25108 | .4498 | .5502 | 16738 | 40942 | 25038 | 16808 | 40803 | 25108 | 282 | .96 |
| 83000 | .50 | .50 | 20750 | 41500 | 20750 | .5000 | .5000 | 20679 | 41359 | 20679 | 20750 | 41218 | 20750 | 282 | .96 |
| 83000 | .55 | .45 | 25108 | 41085 | 16808 | .5502 | .4498 | 25038 | 40942 | 16738 | 25108 | 40803 | 16808 | 282 | .96 |
| 83000 | .60 | .40 | 29880 | 39840 | 13280 | .6003 | .3997 | 29812 | 39693 | 13212 | 29880 | 39558 | 13280 | 282 | .96 |
| 83000 | .65 | .35 | 35068 | 37765 | 10168 | .6505 | .3495 | 35004 | 37612 | 10104 | 35068 | 37484 | 10168 | 281 | .96 |
| 83000 | .70 | .30 | 40670 | 34860 | 7470  | .7007 | .2993 | 40612 | 34698 | 7412  | 40670 | 34581 | 7470  | 279 | .94 |
| 83000 | .75 | .25 | 46688 | 31125 | 5188  | .7508 | .2492 | 46636 | 30954 | 5136  | 46688 | 30852 | 5188  | 273 | .91 |
| 83000 | .80 | .20 | 53120 | 26560 | 3320  | .8010 | .1990 | 53078 | 26381 | 3278  | 53120 | 26297 | 3320  | 263 | .84 |
| 83000 | .85 | .15 | 59968 | 21165 | 1868  | .8510 | .1490 | 59936 | 20981 | 1836  | 59968 | 20919 | 1868  | 246 | .74 |



|       |     |     |       |       |       |       |       |       |       |       |       |       |       |     |     |
|-------|-----|-----|-------|-------|-------|-------|-------|-------|-------|-------|-------|-------|-------|-----|-----|
| 83000 | .90 | .10 | 67230 | 14940 | 830   | .9010 | .0990 | 67211 | 14762 | 811   | 67230 | 14723 | 830   | 217 | .57 |
| 83000 | .95 | .05 | 74908 | 7885  | 208   | .9509 | .0491 | 74900 | 7735  | 200   | 74908 | 7719  | 208   | 166 | .34 |
| 84000 | .05 | .95 | 210   | 7980  | 75810 | .0491 | .9509 | 202   | 7829  | 75802 | 210   | 7813  | 75810 | 167 | .34 |
| 84000 | .10 | .90 | 840   | 15120 | 68040 | .0990 | .9010 | 820   | 14941 | 68020 | 840   | 14902 | 68040 | 218 | .57 |
| 84000 | .15 | .85 | 1890  | 21420 | 60690 | .1490 | .8510 | 1859  | 21235 | 60659 | 1890  | 21172 | 60690 | 248 | .74 |
| 84000 | .20 | .80 | 3360  | 26880 | 53760 | .1991 | .8009 | 3318  | 26700 | 53718 | 3360  | 26615 | 53760 | 265 | .84 |
| 84000 | .25 | .75 | 5250  | 31500 | 47250 | .2492 | .7508 | 5198  | 31328 | 47198 | 5250  | 31225 | 47250 | 275 | .91 |
| 84000 | .30 | .70 | 7560  | 35280 | 41160 | .2993 | .7007 | 7501  | 35117 | 41101 | 7560  | 35000 | 41160 | 280 | .94 |
| 84000 | .35 | .65 | 10290 | 38220 | 35490 | .3495 | .6505 | 10226 | 38066 | 35426 | 10290 | 37937 | 35490 | 283 | .96 |
| 84000 | .40 | .60 | 13440 | 40320 | 30240 | .3997 | .6003 | 13372 | 40172 | 30172 | 13440 | 40036 | 30240 | 284 | .96 |
| 84000 | .45 | .55 | 17010 | 41580 | 25410 | .4498 | .5502 | 16940 | 41437 | 25340 | 17010 | 41296 | 25410 | 284 | .96 |
| 84000 | .50 | .50 | 21000 | 42000 | 21000 | .5000 | .5000 | 20929 | 41858 | 20929 | 21000 | 41716 | 21000 | 284 | .96 |
| 84000 | .55 | .45 | 25410 | 41580 | 17010 | .5502 | .4498 | 25340 | 41437 | 16940 | 25410 | 41296 | 17010 | 284 | .96 |
| 84000 | .60 | .40 | 30240 | 40320 | 13440 | .6003 | .3997 | 30172 | 40172 | 13372 | 30240 | 40036 | 13440 | 284 | .96 |
| 84000 | .65 | .35 | 35490 | 38220 | 10290 | .6505 | .3495 | 35426 | 38066 | 10226 | 35490 | 37937 | 10290 | 283 | .96 |
| 84000 | .70 | .30 | 41160 | 35280 | 7560  | .7007 | .2993 | 41101 | 35117 | 7501  | 41160 | 35000 | 7560  | 280 | .94 |
| 84000 | .75 | .25 | 47250 | 31500 | 5250  | .7508 | .2492 | 47198 | 31328 | 5198  | 47250 | 31225 | 5250  | 275 | .91 |
| 84000 | .80 | .20 | 53760 | 26880 | 3360  | .8009 | .1991 | 53718 | 26700 | 3318  | 53760 | 26615 | 3360  | 265 | .84 |
| 84000 | .85 | .15 | 60690 | 21420 | 1890  | .8510 | .1490 | 60659 | 21235 | 1859  | 60690 | 21172 | 1890  | 248 | .74 |
| 84000 | .90 | .10 | 68040 | 15120 | 840   | .9010 | .0990 | 68020 | 14941 | 820   | 68040 | 14902 | 840   | 218 | .57 |
| 84000 | .95 | .05 | 75810 | 7980  | 210   | .9509 | .0491 | 75802 | 7829  | 202   | 75810 | 7813  | 210   | 167 | .34 |
| 85000 | .05 | .95 | 213   | 8075  | 76713 | .0491 | .9509 | 205   | 7923  | 76705 | 213   | 7907  | 76713 | 168 | .34 |
| 85000 | .10 | .90 | 850   | 15300 | 68850 | .0990 | .9010 | 830   | 15120 | 68830 | 850   | 15080 | 68850 | 220 | .57 |
| 85000 | .15 | .85 | 1913  | 21675 | 61413 | .1490 | .8510 | 1881  | 21489 | 61381 | 1913  | 21426 | 61413 | 249 | .74 |
| 85000 | .20 | .80 | 3400  | 27200 | 54400 | .1991 | .8009 | 3357  | 27019 | 54357 | 3400  | 26933 | 54400 | 267 | .84 |
| 85000 | .25 | .75 | 5313  | 31875 | 47813 | .2492 | .7508 | 5261  | 31702 | 47761 | 5313  | 31598 | 47813 | 277 | .91 |
| 85000 | .30 | .70 | 7650  | 35700 | 41650 | .2993 | .7007 | 7591  | 35536 | 41591 | 7650  | 35418 | 41650 | 282 | .94 |
| 85000 | .35 | .65 | 10413 | 38675 | 35913 | .3495 | .6505 | 10348 | 38520 | 35848 | 10413 | 38390 | 35913 | 285 | .96 |
| 85000 | .40 | .60 | 13600 | 40800 | 30600 | .3997 | .6003 | 13531 | 40652 | 30531 | 13600 | 40515 | 30600 | 285 | .96 |
| 85000 | .45 | .55 | 17213 | 42075 | 25713 | .4498 | .5502 | 17142 | 41931 | 25642 | 17213 | 41789 | 25713 | 286 | .96 |
| 85000 | .50 | .50 | 21250 | 42500 | 21250 | .5000 | .5000 | 21179 | 42357 | 21179 | 21250 | 42214 | 21250 | 286 | .96 |
| 85000 | .55 | .45 | 25713 | 42075 | 17213 | .5502 | .4498 | 25642 | 41931 | 17142 | 25713 | 41789 | 17213 | 286 | .96 |
| 85000 | .60 | .40 | 30600 | 40800 | 13600 | .6003 | .3997 | 30531 | 40652 | 13531 | 30600 | 40515 | 13600 | 285 | .96 |

|       |     |     |       |       |       |       |       |       |       |       |       |       |       |     |     |
|-------|-----|-----|-------|-------|-------|-------|-------|-------|-------|-------|-------|-------|-------|-----|-----|
| 85000 | .65 | .35 | 35913 | 38675 | 10413 | .6505 | .3495 | 35848 | 38520 | 10348 | 35913 | 38390 | 10413 | 285 | .96 |
| 85000 | .70 | .30 | 41650 | 35700 | 7650  | .7007 | .2993 | 41591 | 35536 | 7591  | 41650 | 35418 | 7650  | 282 | .94 |
| 85000 | .75 | .25 | 47813 | 31875 | 5313  | .7508 | .2492 | 47761 | 31702 | 5261  | 47813 | 31598 | 5313  | 277 | .91 |
| 85000 | .80 | .20 | 54400 | 27200 | 3400  | .8009 | .1991 | 54357 | 27019 | 3357  | 54400 | 26933 | 3400  | 267 | .84 |
| 85000 | .85 | .15 | 61413 | 21675 | 1913  | .8510 | .1490 | 61381 | 21489 | 1881  | 61413 | 21426 | 1913  | 249 | .74 |
| 85000 | .90 | .10 | 68850 | 15300 | 850   | .9010 | .0990 | 68830 | 15120 | 830   | 68850 | 15080 | 850   | 220 | .57 |
| 85000 | .95 | .05 | 76713 | 8075  | 213   | .9509 | .0491 | 76705 | 7923  | 205   | 76713 | 7907  | 213   | 168 | .34 |
| 86000 | .05 | .95 | 215   | 8170  | 77615 | .0491 | .9509 | 207   | 8017  | 77607 | 215   | 8001  | 77615 | 169 | .34 |
| 86000 | .10 | .90 | 860   | 15480 | 69660 | .0990 | .9010 | 840   | 15299 | 69640 | 860   | 15259 | 69660 | 221 | .57 |
| 86000 | .15 | .85 | 1935  | 21930 | 62135 | .1490 | .8510 | 1903  | 21743 | 62103 | 1935  | 21679 | 62135 | 251 | .74 |
| 86000 | .20 | .80 | 3440  | 27520 | 55040 | .1991 | .8009 | 3397  | 27338 | 54997 | 3440  | 27252 | 55040 | 268 | .84 |
| 86000 | .25 | .75 | 5375  | 32250 | 48375 | .2492 | .7508 | 5323  | 32076 | 48323 | 5375  | 31972 | 48375 | 278 | .91 |
| 86000 | .30 | .70 | 7740  | 36120 | 42140 | .2993 | .7007 | 7680  | 35955 | 42080 | 7740  | 35836 | 42140 | 284 | .94 |
| 86000 | .35 | .65 | 10535 | 39130 | 36335 | .3495 | .6505 | 10470 | 38974 | 36270 | 10535 | 38844 | 36335 | 286 | .96 |
| 86000 | .40 | .60 | 13760 | 41280 | 30960 | .3997 | .6003 | 13691 | 41131 | 30891 | 13760 | 40993 | 30960 | 287 | .96 |
| 86000 | .45 | .55 | 17415 | 42570 | 26015 | .4498 | .5502 | 17344 | 42425 | 25944 | 17415 | 42283 | 26015 | 287 | .96 |
| 86000 | .50 | .50 | 21500 | 43000 | 21500 | .5000 | .5000 | 21428 | 42856 | 21428 | 21500 | 42713 | 21500 | 287 | .96 |
| 86000 | .55 | .45 | 26015 | 42570 | 17415 | .5502 | .4498 | 25944 | 42425 | 17344 | 26015 | 42283 | 17415 | 287 | .96 |
| 86000 | .60 | .40 | 30960 | 41280 | 13760 | .6003 | .3997 | 30891 | 41131 | 13691 | 30960 | 40993 | 13760 | 287 | .96 |
| 86000 | .65 | .35 | 36335 | 39130 | 10535 | .6505 | .3495 | 36270 | 38974 | 10470 | 36335 | 38844 | 10535 | 286 | .96 |
| 86000 | .70 | .30 | 42140 | 36120 | 7740  | .7007 | .2993 | 42080 | 35955 | 7680  | 42140 | 35836 | 7740  | 284 | .94 |
| 86000 | .75 | .25 | 48375 | 32250 | 5375  | .7508 | .2492 | 48323 | 32076 | 5323  | 48375 | 31972 | 5375  | 278 | .91 |
| 86000 | .80 | .20 | 55040 | 27520 | 3440  | .8009 | .1991 | 54997 | 27338 | 3397  | 55040 | 27252 | 3440  | 268 | .84 |
| 86000 | .85 | .15 | 62135 | 21930 | 1935  | .8510 | .1490 | 62103 | 21743 | 1903  | 62135 | 21679 | 1935  | 251 | .74 |
| 86000 | .90 | .10 | 69660 | 15480 | 860   | .9010 | .0990 | 69640 | 15299 | 840   | 69660 | 15259 | 860   | 221 | .57 |
| 86000 | .95 | .05 | 77615 | 8170  | 215   | .9509 | .0491 | 77607 | 8017  | 207   | 77615 | 8001  | 215   | 169 | .34 |
| 87000 | .05 | .95 | 218   | 8265  | 78518 | .0491 | .9509 | 210   | 8111  | 78510 | 218   | 8095  | 78518 | 170 | .34 |
| 87000 | .10 | .90 | 870   | 15660 | 70470 | .0990 | .9010 | 850   | 15478 | 70450 | 870   | 15438 | 70470 | 222 | .57 |
| 87000 | .15 | .85 | 1958  | 22185 | 62858 | .1490 | .8510 | 1925  | 21997 | 62825 | 1958  | 21933 | 62858 | 252 | .74 |
| 87000 | .20 | .80 | 3480  | 27840 | 55680 | .1991 | .8009 | 3437  | 27656 | 55637 | 3480  | 27570 | 55680 | 270 | .84 |
| 87000 | .25 | .75 | 5438  | 32625 | 48938 | .2492 | .7508 | 5385  | 32450 | 48885 | 5438  | 32345 | 48938 | 280 | .91 |
| 87000 | .30 | .70 | 7830  | 36540 | 42630 | .2993 | .7007 | 7770  | 36374 | 42570 | 7830  | 36255 | 42630 | 285 | .94 |
| 87000 | .35 | .65 | 10658 | 39585 | 36758 | .3495 | .6505 | 10592 | 39428 | 36692 | 10658 | 39297 | 36758 | 288 | .96 |

|       |     |     |       |       |       |       |       |       |       |       |       |       |       |     |     |
|-------|-----|-----|-------|-------|-------|-------|-------|-------|-------|-------|-------|-------|-------|-----|-----|
| 87000 | .40 | .60 | 13920 | 41760 | 31320 | .3997 | .6003 | 13851 | 41610 | 31251 | 13920 | 41471 | 31320 | 289 | .96 |
| 87000 | .45 | .55 | 17618 | 43065 | 26318 | .4498 | .5502 | 17546 | 42919 | 26246 | 17618 | 42776 | 26318 | 289 | .96 |
| 87000 | .50 | .50 | 21750 | 43500 | 21750 | .5000 | .5000 | 21678 | 43355 | 21678 | 21750 | 43211 | 21750 | 289 | .96 |
| 87000 | .55 | .45 | 26318 | 43065 | 17618 | .5502 | .4498 | 26246 | 42919 | 17546 | 26318 | 42776 | 17618 | 289 | .96 |
| 87000 | .60 | .40 | 31320 | 41760 | 13920 | .6003 | .3997 | 31251 | 41610 | 13851 | 31320 | 41471 | 13920 | 289 | .96 |
| 87000 | .65 | .35 | 36758 | 39585 | 10658 | .6505 | .3495 | 36692 | 39428 | 10592 | 36758 | 39297 | 10658 | 288 | .96 |
| 87000 | .70 | .30 | 42630 | 36540 | 7830  | .7007 | .2993 | 42570 | 36374 | 7770  | 42630 | 36255 | 7830  | 285 | .94 |
| 87000 | .75 | .25 | 48938 | 32625 | 5438  | .7508 | .2492 | 48885 | 32450 | 5385  | 48938 | 32345 | 5438  | 280 | .91 |
| 87000 | .80 | .20 | 55680 | 27840 | 3480  | .8009 | .1991 | 55637 | 27656 | 3437  | 55680 | 27570 | 3480  | 270 | .84 |
| 87000 | .85 | .15 | 62858 | 22185 | 1958  | .8510 | .1490 | 62825 | 21997 | 1925  | 62858 | 21933 | 1958  | 252 | .74 |
| 87000 | .90 | .10 | 70470 | 15660 | 870   | .9010 | .0990 | 70450 | 15478 | 850   | 70470 | 15438 | 870   | 222 | .57 |
| 87000 | .95 | .05 | 78518 | 8265  | 218   | .9509 | .0491 | 78510 | 8111  | 210   | 78518 | 8095  | 218   | 170 | .34 |
| 88000 | .05 | .95 | 220   | 8360  | 79420 | .0491 | .9509 | 212   | 8206  | 79412 | 220   | 8190  | 79420 | 170 | .34 |
| 88000 | .10 | .90 | 880   | 15840 | 71280 | .0990 | .9010 | 860   | 15657 | 71260 | 880   | 15617 | 71280 | 223 | .57 |
| 88000 | .15 | .85 | 1980  | 22440 | 63580 | .1490 | .8510 | 1948  | 22251 | 63548 | 1980  | 22187 | 63580 | 253 | .74 |
| 88000 | .20 | .80 | 3520  | 28160 | 56320 | .1991 | .8009 | 3477  | 27975 | 56277 | 3520  | 27889 | 56320 | 271 | .84 |
| 88000 | .25 | .75 | 5500  | 33000 | 49500 | .2492 | .7508 | 5447  | 32824 | 49447 | 5500  | 32719 | 49500 | 281 | .91 |
| 88000 | .30 | .70 | 7920  | 36960 | 43120 | .2993 | .7007 | 7860  | 36793 | 43060 | 7920  | 36673 | 43120 | 287 | .94 |
| 88000 | .35 | .65 | 10780 | 40040 | 37180 | .3495 | .6505 | 10714 | 39882 | 37114 | 10780 | 39750 | 37180 | 290 | .96 |
| 88000 | .40 | .60 | 14080 | 42240 | 31680 | .3997 | .6003 | 14010 | 42089 | 31610 | 14080 | 41950 | 31680 | 290 | .96 |
| 88000 | .45 | .55 | 17820 | 43560 | 26620 | .4498 | .5502 | 17748 | 43413 | 26548 | 17820 | 43269 | 26620 | 291 | .96 |
| 88000 | .50 | .50 | 22000 | 44000 | 22000 | .5000 | .5000 | 21927 | 43855 | 21927 | 22000 | 43709 | 22000 | 291 | .96 |
| 88000 | .55 | .45 | 26620 | 43560 | 17820 | .5502 | .4498 | 26548 | 43413 | 17748 | 26620 | 43269 | 17820 | 291 | .96 |
| 88000 | .60 | .40 | 31680 | 42240 | 14080 | .6003 | .3997 | 31610 | 42089 | 14010 | 31680 | 41950 | 14080 | 290 | .96 |
| 88000 | .65 | .35 | 37180 | 40040 | 10780 | .6505 | .3495 | 37114 | 39882 | 10714 | 37180 | 39750 | 10780 | 290 | .96 |
| 88000 | .70 | .30 | 43120 | 36960 | 7920  | .7007 | .2993 | 43060 | 36793 | 7860  | 43120 | 36673 | 7920  | 287 | .94 |
| 88000 | .75 | .25 | 49500 | 33000 | 5500  | .7508 | .2492 | 49447 | 32824 | 5447  | 49500 | 32719 | 5500  | 281 | .91 |
| 88000 | .80 | .20 | 56320 | 28160 | 3520  | .8009 | .1991 | 56277 | 27975 | 3477  | 56320 | 27889 | 3520  | 271 | .84 |
| 88000 | .85 | .15 | 63580 | 22440 | 1980  | .8510 | .1490 | 63548 | 22251 | 1948  | 63580 | 22187 | 1980  | 253 | .74 |
| 88000 | .90 | .10 | 71280 | 15840 | 880   | .9010 | .0990 | 71260 | 15657 | 860   | 71280 | 15617 | 880   | 223 | .57 |
| 88000 | .95 | .05 | 79420 | 8360  | 220   | .9509 | .0491 | 79412 | 8206  | 212   | 79420 | 8190  | 220   | 170 | .34 |
| 89000 | .05 | .95 | 223   | 8455  | 80323 | .0491 | .9509 | 214   | 8300  | 80314 | 223   | 8284  | 80323 | 171 | .34 |
| 89000 | .10 | .90 | 890   | 16020 | 72090 | .0990 | .9010 | 870   | 15836 | 72070 | 890   | 15795 | 72090 | 225 | .57 |

|       |     |     |       |       |       |       |       |       |       |       |       |       |       |     |     |
|-------|-----|-----|-------|-------|-------|-------|-------|-------|-------|-------|-------|-------|-------|-----|-----|
| 89000 | .15 | .85 | 2003  | 22695 | 64303 | .1490 | .8510 | 1970  | 22505 | 64270 | 2003  | 22440 | 64303 | 255 | .74 |
| 89000 | .20 | .80 | 3560  | 28480 | 56960 | .1991 | .8009 | 3516  | 28294 | 56916 | 3560  | 28207 | 56960 | 273 | .84 |
| 89000 | .25 | .75 | 5563  | 33375 | 50063 | .2492 | .7508 | 5509  | 33198 | 50009 | 5563  | 33092 | 50063 | 283 | .91 |
| 89000 | .30 | .70 | 8010  | 37380 | 43610 | .2993 | .7007 | 7949  | 37213 | 43549 | 8010  | 37091 | 43610 | 289 | .94 |
| 89000 | .35 | .65 | 10903 | 40495 | 37603 | .3495 | .6505 | 10836 | 40336 | 37536 | 10903 | 40204 | 37603 | 291 | .96 |
| 89000 | .40 | .60 | 14240 | 42720 | 32040 | .3997 | .6003 | 14170 | 42568 | 31970 | 14240 | 42428 | 32040 | 292 | .96 |
| 89000 | .45 | .55 | 18023 | 44055 | 26923 | .4498 | .5502 | 17950 | 43907 | 26850 | 18023 | 43763 | 26923 | 292 | .96 |
| 89000 | .50 | .50 | 22250 | 44500 | 22250 | .5000 | .5000 | 22177 | 44354 | 22177 | 22250 | 44208 | 22250 | 292 | .96 |
| 89000 | .55 | .45 | 26923 | 44055 | 18023 | .5502 | .4498 | 26850 | 43907 | 17950 | 26923 | 43763 | 18023 | 292 | .96 |
| 89000 | .60 | .40 | 32040 | 42720 | 14240 | .6003 | .3997 | 31970 | 42568 | 14170 | 32040 | 42428 | 14240 | 292 | .96 |
| 89000 | .65 | .35 | 37603 | 40495 | 10903 | .6505 | .3495 | 37536 | 40336 | 10836 | 37603 | 40204 | 10903 | 291 | .96 |
| 89000 | .70 | .30 | 43610 | 37380 | 8010  | .7007 | .2993 | 43549 | 37213 | 7949  | 43610 | 37091 | 8010  | 289 | .94 |
| 89000 | .75 | .25 | 50063 | 33375 | 5563  | .7508 | .2492 | 50009 | 33198 | 5509  | 50063 | 33092 | 5563  | 283 | .91 |
| 89000 | .80 | .20 | 56960 | 28480 | 3560  | .8009 | .1991 | 56916 | 28294 | 3516  | 56960 | 28207 | 3560  | 273 | .84 |
| 89000 | .85 | .15 | 64303 | 22695 | 2003  | .8510 | .1490 | 64270 | 22505 | 1970  | 64303 | 22440 | 2003  | 255 | .74 |
| 89000 | .90 | .10 | 72090 | 16020 | 890   | .9010 | .0990 | 72070 | 15836 | 870   | 72090 | 15795 | 890   | 225 | .57 |
| 89000 | .95 | .05 | 80323 | 8455  | 223   | .9509 | .0491 | 80314 | 8300  | 214   | 80323 | 8284  | 223   | 171 | .34 |
| 90000 | .05 | .95 | 225   | 8550  | 81225 | .0491 | .9509 | 217   | 8394  | 81217 | 225   | 8378  | 81225 | 172 | .34 |
| 90000 | .10 | .90 | 900   | 16200 | 72900 | .0990 | .9010 | 880   | 16015 | 72880 | 900   | 15974 | 72900 | 226 | .57 |
| 90000 | .15 | .85 | 2025  | 22950 | 65025 | .1490 | .8510 | 1992  | 22759 | 64992 | 2025  | 22694 | 65025 | 256 | .74 |
| 90000 | .20 | .80 | 3600  | 28800 | 57600 | .1991 | .8009 | 3556  | 28613 | 57556 | 3600  | 28526 | 57600 | 274 | .84 |
| 90000 | .25 | .75 | 5625  | 33750 | 50625 | .2492 | .7508 | 5572  | 33572 | 50572 | 5625  | 33465 | 50625 | 285 | .91 |
| 90000 | .30 | .70 | 8100  | 37800 | 44100 | .2994 | .7006 | 8039  | 37632 | 44039 | 8100  | 37510 | 44100 | 290 | .94 |
| 90000 | .35 | .65 | 11025 | 40950 | 38025 | .3495 | .6505 | 10958 | 40790 | 37958 | 11025 | 40657 | 38025 | 293 | .96 |
| 90000 | .40 | .60 | 14400 | 43200 | 32400 | .3997 | .6003 | 14330 | 43047 | 32330 | 14400 | 42906 | 32400 | 294 | .96 |
| 90000 | .45 | .55 | 18225 | 44550 | 27225 | .4498 | .5502 | 18152 | 44402 | 27152 | 18225 | 44256 | 27225 | 294 | .96 |
| 90000 | .50 | .50 | 22500 | 45000 | 22500 | .5000 | .5000 | 22427 | 44853 | 22427 | 22500 | 44706 | 22500 | 294 | .96 |
| 90000 | .55 | .45 | 27225 | 44550 | 18225 | .5502 | .4498 | 27152 | 44402 | 18152 | 27225 | 44256 | 18225 | 294 | .96 |
| 90000 | .60 | .40 | 32400 | 43200 | 14400 | .6003 | .3997 | 32330 | 43047 | 14330 | 32400 | 42906 | 14400 | 294 | .96 |
| 90000 | .65 | .35 | 38025 | 40950 | 11025 | .6505 | .3495 | 37958 | 40790 | 10958 | 38025 | 40657 | 11025 | 293 | .96 |
| 90000 | .70 | .30 | 44100 | 37800 | 8100  | .7006 | .2994 | 44039 | 37632 | 8039  | 44100 | 37510 | 8100  | 290 | .94 |
| 90000 | .75 | .25 | 50625 | 33750 | 5625  | .7508 | .2492 | 50572 | 33572 | 5572  | 50625 | 33465 | 5625  | 285 | .91 |
| 90000 | .80 | .20 | 57600 | 28800 | 3600  | .8009 | .1991 | 57556 | 28613 | 3556  | 57600 | 28526 | 3600  | 274 | .84 |

|       |     |     |       |       |       |       |       |       |       |       |       |       |       |     |     |
|-------|-----|-----|-------|-------|-------|-------|-------|-------|-------|-------|-------|-------|-------|-----|-----|
| 90000 | .85 | .15 | 65025 | 22950 | 2025  | .8510 | .1490 | 64992 | 22759 | 1992  | 65025 | 22694 | 2025  | 256 | .74 |
| 90000 | .90 | .10 | 72900 | 16200 | 900   | .9010 | .0990 | 72880 | 16015 | 880   | 72900 | 15974 | 900   | 226 | .57 |
| 90000 | .95 | .05 | 81225 | 8550  | 225   | .9509 | .0491 | 81217 | 8394  | 217   | 81225 | 8378  | 225   | 172 | .34 |
| 91000 | .05 | .95 | 228   | 8645  | 82128 | .0491 | .9509 | 219   | 8488  | 82119 | 228   | 8472  | 82128 | 173 | .34 |
| 91000 | .10 | .90 | 910   | 16380 | 73710 | .0990 | .9010 | 890   | 16194 | 73690 | 910   | 16153 | 73710 | 227 | .57 |
| 91000 | .15 | .85 | 2048  | 23205 | 65748 | .1490 | .8510 | 2015  | 23013 | 65715 | 2048  | 22947 | 65748 | 258 | .74 |
| 91000 | .20 | .80 | 3640  | 29120 | 58240 | .1991 | .8009 | 3596  | 28932 | 58196 | 3640  | 28844 | 58240 | 276 | .84 |
| 91000 | .25 | .75 | 5688  | 34125 | 51188 | .2492 | .7508 | 5634  | 33946 | 51134 | 5688  | 33839 | 51188 | 286 | .91 |
| 91000 | .30 | .70 | 8190  | 38220 | 44590 | .2994 | .7006 | 8129  | 38051 | 44529 | 8190  | 37928 | 44590 | 292 | .94 |
| 91000 | .35 | .65 | 11148 | 41405 | 38448 | .3495 | .6505 | 11081 | 41244 | 38381 | 11148 | 41111 | 38448 | 294 | .96 |
| 91000 | .40 | .60 | 14560 | 43680 | 32760 | .3997 | .6003 | 14489 | 43526 | 32689 | 14560 | 43385 | 32760 | 295 | .96 |
| 91000 | .45 | .55 | 18428 | 45045 | 27528 | .4498 | .5502 | 18354 | 44896 | 27454 | 18428 | 44749 | 27528 | 296 | .96 |
| 91000 | .50 | .50 | 22750 | 45500 | 22750 | .5000 | .5000 | 22676 | 45352 | 22676 | 22750 | 45204 | 22750 | 296 | .96 |
| 91000 | .55 | .45 | 27528 | 45045 | 18428 | .5502 | .4498 | 27454 | 44896 | 18354 | 27528 | 44749 | 18428 | 296 | .96 |
| 91000 | .60 | .40 | 32760 | 43680 | 14560 | .6003 | .3997 | 32689 | 43526 | 14489 | 32760 | 43385 | 14560 | 295 | .96 |
| 91000 | .65 | .35 | 38448 | 41405 | 11148 | .6505 | .3495 | 38381 | 41244 | 11081 | 38448 | 41111 | 11148 | 294 | .96 |
| 91000 | .70 | .30 | 44590 | 38220 | 8190  | .7006 | .2994 | 44529 | 38051 | 8129  | 44590 | 37928 | 8190  | 292 | .94 |
| 91000 | .75 | .25 | 51188 | 34125 | 5688  | .7508 | .2492 | 51134 | 33946 | 5634  | 51188 | 33839 | 5688  | 286 | .91 |
| 91000 | .80 | .20 | 58240 | 29120 | 3640  | .8009 | .1991 | 58196 | 28932 | 3596  | 58240 | 28844 | 3640  | 276 | .84 |
| 91000 | .85 | .15 | 65748 | 23205 | 2048  | .8510 | .1490 | 65715 | 23013 | 2015  | 65748 | 22947 | 2048  | 258 | .74 |
| 91000 | .90 | .10 | 73710 | 16380 | 910   | .9010 | .0990 | 73690 | 16194 | 890   | 73710 | 16153 | 910   | 227 | .57 |
| 91000 | .95 | .05 | 82128 | 8645  | 228   | .9509 | .0491 | 82119 | 8488  | 219   | 82128 | 8472  | 228   | 173 | .34 |
| 92000 | .05 | .95 | 230   | 8740  | 83030 | .0491 | .9509 | 222   | 8582  | 83022 | 230   | 8566  | 83030 | 174 | .34 |
| 92000 | .10 | .90 | 920   | 16560 | 74520 | .0990 | .9010 | 900   | 16373 | 74500 | 920   | 16332 | 74520 | 228 | .57 |
| 92000 | .15 | .85 | 2070  | 23460 | 66470 | .1490 | .8510 | 2037  | 23267 | 66437 | 2070  | 23201 | 66470 | 259 | .74 |
| 92000 | .20 | .80 | 3680  | 29440 | 58880 | .1991 | .8009 | 3636  | 29251 | 58836 | 3680  | 29163 | 58880 | 277 | .84 |
| 92000 | .25 | .75 | 5750  | 34500 | 51750 | .2492 | .7508 | 5696  | 34320 | 51696 | 5750  | 34212 | 51750 | 288 | .91 |
| 92000 | .30 | .70 | 8280  | 38640 | 45080 | .2994 | .7006 | 8218  | 38470 | 45018 | 8280  | 38347 | 45080 | 293 | .94 |
| 92000 | .35 | .65 | 11270 | 41860 | 38870 | .3495 | .6505 | 11203 | 41699 | 38803 | 11270 | 41564 | 38870 | 296 | .96 |
| 92000 | .40 | .60 | 14720 | 44160 | 33120 | .3997 | .6003 | 14649 | 44006 | 33049 | 14720 | 43863 | 33120 | 297 | .96 |
| 92000 | .45 | .55 | 18630 | 45540 | 27830 | .4498 | .5502 | 18556 | 45390 | 27756 | 18630 | 45243 | 27830 | 297 | .96 |
| 92000 | .50 | .50 | 23000 | 46000 | 23000 | .5000 | .5000 | 22926 | 45851 | 22926 | 23000 | 45703 | 23000 | 297 | .96 |
| 92000 | .55 | .45 | 27830 | 45540 | 18630 | .5502 | .4498 | 27756 | 45390 | 18556 | 27830 | 45243 | 18630 | 297 | .96 |

|       |     |     |       |       |       |       |       |       |       |       |       |       |       |     |     |
|-------|-----|-----|-------|-------|-------|-------|-------|-------|-------|-------|-------|-------|-------|-----|-----|
| 92000 | .60 | .40 | 33120 | 44160 | 14720 | .6003 | .3997 | 33049 | 44006 | 14649 | 33120 | 43863 | 14720 | 297 | .96 |
| 92000 | .65 | .35 | 38870 | 41860 | 11270 | .6505 | .3495 | 38803 | 41699 | 11203 | 38870 | 41564 | 11270 | 296 | .96 |
| 92000 | .70 | .30 | 45080 | 38640 | 8280  | .7006 | .2994 | 45018 | 38470 | 8218  | 45080 | 38347 | 8280  | 293 | .94 |
| 92000 | .75 | .25 | 51750 | 34500 | 5750  | .7508 | .2492 | 51696 | 34320 | 5696  | 51750 | 34212 | 5750  | 288 | .91 |
| 92000 | .80 | .20 | 58880 | 29440 | 3680  | .8009 | .1991 | 58836 | 29251 | 3636  | 58880 | 29163 | 3680  | 277 | .84 |
| 92000 | .85 | .15 | 66470 | 23460 | 2070  | .8510 | .1490 | 66437 | 23267 | 2037  | 66470 | 23201 | 2070  | 259 | .74 |
| 92000 | .90 | .10 | 74520 | 16560 | 920   | .9010 | .0990 | 74500 | 16373 | 900   | 74520 | 16332 | 920   | 228 | .57 |
| 92000 | .95 | .05 | 83030 | 8740  | 230   | .9509 | .0491 | 83022 | 8582  | 222   | 83030 | 8566  | 230   | 174 | .34 |
| 93000 | .05 | .95 | 233   | 8835  | 83933 | .0492 | .9508 | 224   | 8676  | 83924 | 233   | 8660  | 83933 | 175 | .34 |
| 93000 | .10 | .90 | 930   | 16740 | 75330 | .0990 | .9010 | 909   | 16552 | 75309 | 930   | 16510 | 75330 | 230 | .57 |
| 93000 | .15 | .85 | 2093  | 23715 | 67193 | .1490 | .8510 | 2059  | 23521 | 67159 | 2093  | 23454 | 67193 | 261 | .74 |
| 93000 | .20 | .80 | 3720  | 29760 | 59520 | .1991 | .8009 | 3675  | 29570 | 59475 | 3720  | 29481 | 59520 | 279 | .84 |
| 93000 | .25 | .75 | 5813  | 34875 | 52313 | .2492 | .7508 | 5758  | 34694 | 52258 | 5813  | 34586 | 52313 | 289 | .91 |
| 93000 | .30 | .70 | 8370  | 39060 | 45570 | .2994 | .7006 | 8308  | 38889 | 45508 | 8370  | 38765 | 45570 | 295 | .94 |
| 93000 | .35 | .65 | 11393 | 42315 | 39293 | .3495 | .6505 | 11325 | 42153 | 39225 | 11393 | 42017 | 39293 | 298 | .96 |
| 93000 | .40 | .60 | 14880 | 44640 | 33480 | .3997 | .6003 | 14808 | 44485 | 33408 | 14880 | 44341 | 33480 | 299 | .96 |
| 93000 | .45 | .55 | 18833 | 46035 | 28133 | .4498 | .5502 | 18759 | 45884 | 28059 | 18833 | 45736 | 28133 | 299 | .96 |
| 93000 | .50 | .50 | 23250 | 46500 | 23250 | .5000 | .5000 | 23175 | 46351 | 23175 | 23250 | 46201 | 23250 | 299 | .96 |
| 93000 | .55 | .45 | 28133 | 46035 | 18833 | .5502 | .4498 | 28059 | 45884 | 18759 | 28133 | 45736 | 18833 | 299 | .96 |
| 93000 | .60 | .40 | 33480 | 44640 | 14880 | .6003 | .3997 | 33408 | 44485 | 14808 | 33480 | 44341 | 14880 | 299 | .96 |
| 93000 | .65 | .35 | 39293 | 42315 | 11393 | .6505 | .3495 | 39225 | 42153 | 11325 | 39293 | 42017 | 11393 | 298 | .96 |
| 93000 | .70 | .30 | 45570 | 39060 | 8370  | .7006 | .2994 | 45508 | 38889 | 8308  | 45570 | 38765 | 8370  | 295 | .94 |
| 93000 | .75 | .25 | 52313 | 34875 | 5813  | .7508 | .2492 | 52258 | 34694 | 5758  | 52313 | 34586 | 5813  | 289 | .91 |
| 93000 | .80 | .20 | 59520 | 29760 | 3720  | .8009 | .1991 | 59475 | 29570 | 3675  | 59520 | 29481 | 3720  | 279 | .84 |
| 93000 | .85 | .15 | 67193 | 23715 | 2093  | .8510 | .1490 | 67159 | 23521 | 2059  | 67193 | 23454 | 2093  | 261 | .74 |
| 93000 | .90 | .10 | 75330 | 16740 | 930   | .9010 | .0990 | 75309 | 16552 | 909   | 75330 | 16510 | 930   | 230 | .57 |
| 93000 | .95 | .05 | 83933 | 8835  | 233   | .9508 | .0492 | 83924 | 8676  | 224   | 83933 | 8660  | 233   | 175 | .34 |
| 94000 | .05 | .95 | 235   | 8930  | 84835 | .0492 | .9508 | 227   | 8770  | 84827 | 235   | 8754  | 84835 | 176 | .34 |
| 94000 | .10 | .90 | 940   | 16920 | 76140 | .0990 | .9010 | 919   | 16731 | 76119 | 940   | 16689 | 76140 | 231 | .57 |
| 94000 | .15 | .85 | 2115  | 23970 | 67915 | .1490 | .8510 | 2082  | 23775 | 67882 | 2115  | 23708 | 67915 | 262 | .74 |
| 94000 | .20 | .80 | 3760  | 30080 | 60160 | .1991 | .8009 | 3715  | 29889 | 60115 | 3760  | 29800 | 60160 | 280 | .84 |
| 94000 | .25 | .75 | 5875  | 35250 | 52875 | .2492 | .7508 | 5821  | 35068 | 52821 | 5875  | 34959 | 52875 | 291 | .91 |
| 94000 | .30 | .70 | 8460  | 39480 | 46060 | .2994 | .7006 | 8398  | 39308 | 45998 | 8460  | 39183 | 46060 | 297 | .94 |

|       |     |     |       |       |       |       |       |       |       |       |       |       |       |     |     |
|-------|-----|-----|-------|-------|-------|-------|-------|-------|-------|-------|-------|-------|-------|-----|-----|
| 94000 | .35 | .65 | 11515 | 42770 | 39715 | .3495 | .6505 | 11447 | 42607 | 39647 | 11515 | 42471 | 39715 | 299 | .96 |
| 94000 | .40 | .60 | 15040 | 45120 | 33840 | .3997 | .6003 | 14968 | 44964 | 33768 | 15040 | 44820 | 33840 | 300 | .96 |
| 94000 | .45 | .55 | 19035 | 46530 | 28435 | .4498 | .5502 | 18961 | 46378 | 28361 | 19035 | 46230 | 28435 | 300 | .96 |
| 94000 | .50 | .50 | 23500 | 47000 | 23500 | .5000 | .5000 | 23425 | 46850 | 23425 | 23500 | 46700 | 23500 | 300 | .96 |
| 94000 | .55 | .45 | 28435 | 46530 | 19035 | .5502 | .4498 | 28361 | 46378 | 18961 | 28435 | 46230 | 19035 | 300 | .96 |
| 94000 | .60 | .40 | 33840 | 45120 | 15040 | .6003 | .3997 | 33768 | 44964 | 14968 | 33840 | 44820 | 15040 | 300 | .96 |
| 94000 | .65 | .35 | 39715 | 42770 | 11515 | .6505 | .3495 | 39647 | 42607 | 11447 | 39715 | 42471 | 11515 | 299 | .96 |
| 94000 | .70 | .30 | 46060 | 39480 | 8460  | .7006 | .2994 | 45998 | 39308 | 8398  | 46060 | 39183 | 8460  | 297 | .94 |
| 94000 | .75 | .25 | 52875 | 35250 | 5875  | .7508 | .2492 | 52821 | 35068 | 5821  | 52875 | 34959 | 5875  | 291 | .91 |
| 94000 | .80 | .20 | 60160 | 30080 | 3760  | .8009 | .1991 | 60115 | 29889 | 3715  | 60160 | 29800 | 3760  | 280 | .84 |
| 94000 | .85 | .15 | 67915 | 23970 | 2115  | .8510 | .1490 | 67882 | 23775 | 2082  | 67915 | 23708 | 2115  | 262 | .74 |
| 94000 | .90 | .10 | 76140 | 16920 | 940   | .9010 | .0990 | 76119 | 16731 | 919   | 76140 | 16689 | 940   | 231 | .57 |
| 94000 | .95 | .05 | 84835 | 8930  | 235   | .9508 | .0492 | 84827 | 8770  | 227   | 84835 | 8754  | 235   | 176 | .34 |
| 95000 | .05 | .95 | 238   | 9025  | 85738 | .0492 | .9508 | 229   | 8865  | 85729 | 238   | 8848  | 85738 | 177 | .34 |
| 95000 | .10 | .90 | 950   | 17100 | 76950 | .0990 | .9010 | 929   | 16910 | 76929 | 950   | 16868 | 76950 | 232 | .57 |
| 95000 | .15 | .85 | 2138  | 24225 | 68638 | .1490 | .8510 | 2104  | 24029 | 68604 | 2138  | 23962 | 68638 | 263 | .74 |
| 95000 | .20 | .80 | 3800  | 30400 | 60800 | .1991 | .8009 | 3755  | 30208 | 60755 | 3800  | 30118 | 60800 | 282 | .84 |
| 95000 | .25 | .75 | 5938  | 35625 | 53438 | .2492 | .7508 | 5883  | 35442 | 53383 | 5938  | 35333 | 53438 | 292 | .91 |
| 95000 | .30 | .70 | 8550  | 39900 | 46550 | .2994 | .7006 | 8487  | 39727 | 46487 | 8550  | 39602 | 46550 | 298 | .94 |
| 95000 | .35 | .65 | 11638 | 43225 | 40138 | .3495 | .6505 | 11569 | 43061 | 40069 | 11638 | 42924 | 40138 | 301 | .96 |
| 95000 | .40 | .60 | 15200 | 45600 | 34200 | .3997 | .6003 | 15128 | 45443 | 34128 | 15200 | 45298 | 34200 | 302 | .96 |
| 95000 | .45 | .55 | 19238 | 47025 | 28738 | .4498 | .5502 | 19163 | 46872 | 28663 | 19238 | 46723 | 28738 | 302 | .96 |
| 95000 | .50 | .50 | 23750 | 47500 | 23750 | .5000 | .5000 | 23674 | 47349 | 23674 | 23750 | 47198 | 23750 | 302 | .96 |
| 95000 | .55 | .45 | 28738 | 47025 | 19238 | .5502 | .4498 | 28663 | 46872 | 19163 | 28738 | 46723 | 19238 | 302 | .96 |
| 95000 | .60 | .40 | 34200 | 45600 | 15200 | .6003 | .3997 | 34128 | 45443 | 15128 | 34200 | 45298 | 15200 | 302 | .96 |
| 95000 | .65 | .35 | 40138 | 43225 | 11638 | .6505 | .3495 | 40069 | 43061 | 11569 | 40138 | 42924 | 11638 | 301 | .96 |
| 95000 | .70 | .30 | 46550 | 39900 | 8550  | .7006 | .2994 | 46487 | 39727 | 8487  | 46550 | 39602 | 8550  | 298 | .94 |
| 95000 | .75 | .25 | 53438 | 35625 | 5938  | .7508 | .2492 | 53383 | 35442 | 5883  | 53438 | 35333 | 5938  | 292 | .91 |
| 95000 | .80 | .20 | 60800 | 30400 | 3800  | .8009 | .1991 | 60755 | 30208 | 3755  | 60800 | 30118 | 3800  | 282 | .84 |
| 95000 | .85 | .15 | 68638 | 24225 | 2138  | .8510 | .1490 | 68604 | 24029 | 2104  | 68638 | 23962 | 2138  | 263 | .74 |
| 95000 | .90 | .10 | 76950 | 17100 | 950   | .9010 | .0990 | 76929 | 16910 | 929   | 76950 | 16868 | 950   | 232 | .57 |
| 95000 | .95 | .05 | 85738 | 9025  | 238   | .9508 | .0492 | 85729 | 8865  | 229   | 85738 | 8848  | 238   | 177 | .34 |
| 96000 | .05 | .95 | 240   | 9120  | 86640 | .0492 | .9508 | 232   | 8959  | 86632 | 240   | 8942  | 86640 | 178 | .34 |

|       |     |     |       |       |       |       |       |       |       |       |       |       |       |     |     |
|-------|-----|-----|-------|-------|-------|-------|-------|-------|-------|-------|-------|-------|-------|-----|-----|
| 96000 | .10 | .90 | 960   | 17280 | 77760 | .0990 | .9010 | 939   | 17089 | 77739 | 960   | 17047 | 77760 | 233 | .57 |
| 96000 | .15 | .85 | 2160  | 24480 | 69360 | .1490 | .8510 | 2126  | 24283 | 69326 | 2160  | 24215 | 69360 | 265 | .74 |
| 96000 | .20 | .80 | 3840  | 30720 | 61440 | .1991 | .8009 | 3795  | 30527 | 61395 | 3840  | 30437 | 61440 | 283 | .84 |
| 96000 | .25 | .75 | 6000  | 36000 | 54000 | .2492 | .7508 | 5945  | 35816 | 53945 | 6000  | 35706 | 54000 | 294 | .91 |
| 96000 | .30 | .70 | 8640  | 40320 | 47040 | .2994 | .7006 | 8577  | 40146 | 46977 | 8640  | 40020 | 47040 | 300 | .94 |
| 96000 | .35 | .65 | 11760 | 43680 | 40560 | .3495 | .6505 | 11691 | 43515 | 40491 | 11760 | 43378 | 40560 | 302 | .96 |
| 96000 | .40 | .60 | 15360 | 46080 | 34560 | .3997 | .6003 | 15287 | 45922 | 34487 | 15360 | 45777 | 34560 | 303 | .96 |
| 96000 | .45 | .55 | 19440 | 47520 | 29040 | .4498 | .5502 | 19365 | 47367 | 28965 | 19440 | 47216 | 29040 | 304 | .96 |
| 96000 | .50 | .50 | 24000 | 48000 | 24000 | .5000 | .5000 | 23924 | 47848 | 23924 | 24000 | 47696 | 24000 | 304 | .96 |
| 96000 | .55 | .45 | 29040 | 47520 | 19440 | .5502 | .4498 | 28965 | 47367 | 19365 | 29040 | 47216 | 19440 | 304 | .96 |
| 96000 | .60 | .40 | 34560 | 46080 | 15360 | .6003 | .3997 | 34487 | 45922 | 15287 | 34560 | 45777 | 15360 | 303 | .96 |
| 96000 | .65 | .35 | 40560 | 43680 | 11760 | .6505 | .3495 | 40491 | 43515 | 11691 | 40560 | 43378 | 11760 | 302 | .96 |
| 96000 | .70 | .30 | 47040 | 40320 | 8640  | .7006 | .2994 | 46977 | 40146 | 8577  | 47040 | 40020 | 8640  | 300 | .94 |
| 96000 | .75 | .25 | 54000 | 36000 | 6000  | .7508 | .2492 | 53945 | 35816 | 5945  | 54000 | 35706 | 6000  | 294 | .91 |
| 96000 | .80 | .20 | 61440 | 30720 | 3840  | .8009 | .1991 | 61395 | 30527 | 3795  | 61440 | 30437 | 3840  | 283 | .84 |
| 96000 | .85 | .15 | 69360 | 24480 | 2160  | .8510 | .1490 | 69326 | 24283 | 2126  | 69360 | 24215 | 2160  | 265 | .74 |
| 96000 | .90 | .10 | 77760 | 17280 | 960   | .9010 | .0990 | 77739 | 17089 | 939   | 77760 | 17047 | 960   | 233 | .57 |
| 96000 | .95 | .05 | 86640 | 9120  | 240   | .9508 | .0492 | 86632 | 8959  | 232   | 86640 | 8942  | 240   | 178 | .34 |
| 97000 | .05 | .95 | 243   | 9215  | 87543 | .0492 | .9508 | 234   | 9053  | 87534 | 243   | 9036  | 87543 | 179 | .34 |
| 97000 | .10 | .90 | 970   | 17460 | 78570 | .0990 | .9010 | 949   | 17268 | 78549 | 970   | 17225 | 78570 | 235 | .57 |
| 97000 | .15 | .85 | 2183  | 24735 | 70083 | .1490 | .8510 | 2149  | 24537 | 70049 | 2183  | 24469 | 70083 | 266 | .74 |
| 97000 | .20 | .80 | 3880  | 31040 | 62080 | .1991 | .8009 | 3835  | 30846 | 62035 | 3880  | 30755 | 62080 | 285 | .84 |
| 97000 | .25 | .75 | 6063  | 36375 | 54563 | .2492 | .7508 | 6007  | 36190 | 54507 | 6063  | 36079 | 54563 | 296 | .90 |
| 97000 | .30 | .70 | 8730  | 40740 | 47530 | .2994 | .7006 | 8667  | 40565 | 47467 | 8730  | 40439 | 47530 | 301 | .94 |
| 97000 | .35 | .65 | 11883 | 44135 | 40983 | .3495 | .6505 | 11813 | 43969 | 40913 | 11883 | 43831 | 40983 | 304 | .96 |
| 97000 | .40 | .60 | 15520 | 46560 | 34920 | .3997 | .6003 | 15447 | 46401 | 34847 | 15520 | 46255 | 34920 | 305 | .96 |
| 97000 | .45 | .55 | 19643 | 48015 | 29343 | .4498 | .5502 | 19567 | 47861 | 29267 | 19643 | 47710 | 29343 | 305 | .96 |
| 97000 | .50 | .50 | 24250 | 48500 | 24250 | .5000 | .5000 | 24174 | 48347 | 24174 | 24250 | 48195 | 24250 | 305 | .96 |
| 97000 | .55 | .45 | 29343 | 48015 | 19643 | .5502 | .4498 | 29267 | 47861 | 19567 | 29343 | 47710 | 19643 | 305 | .96 |
| 97000 | .60 | .40 | 34920 | 46560 | 15520 | .6003 | .3997 | 34847 | 46401 | 15447 | 34920 | 46255 | 15520 | 305 | .96 |
| 97000 | .65 | .35 | 40983 | 44135 | 11883 | .6505 | .3495 | 40913 | 43969 | 11813 | 40983 | 43831 | 11883 | 304 | .96 |
| 97000 | .70 | .30 | 47530 | 40740 | 8730  | .7006 | .2994 | 47467 | 40565 | 8667  | 47530 | 40439 | 8730  | 301 | .94 |
| 97000 | .75 | .25 | 54563 | 36375 | 6063  | .7508 | .2492 | 54507 | 36190 | 6007  | 54563 | 36079 | 6063  | 296 | .90 |



|       |     |     |       |       |       |       |       |       |       |       |       |       |       |     |     |
|-------|-----|-----|-------|-------|-------|-------|-------|-------|-------|-------|-------|-------|-------|-----|-----|
| 97000 | .80 | .20 | 62080 | 31040 | 3880  | .8009 | .1991 | 62035 | 30846 | 3835  | 62080 | 30755 | 3880  | 285 | .84 |
| 97000 | .85 | .15 | 70083 | 24735 | 2183  | .8510 | .1490 | 70049 | 24537 | 2149  | 70083 | 24469 | 2183  | 266 | .74 |
| 97000 | .90 | .10 | 78570 | 17460 | 970   | .9010 | .0990 | 78549 | 17268 | 949   | 78570 | 17225 | 970   | 235 | .57 |
| 97000 | .95 | .05 | 87543 | 9215  | 243   | .9508 | .0492 | 87534 | 9053  | 234   | 87543 | 9036  | 243   | 179 | .34 |
| 98000 | .05 | .95 | 245   | 9310  | 88445 | .0492 | .9508 | 237   | 9147  | 88437 | 245   | 9130  | 88445 | 180 | .34 |
| 98000 | .10 | .90 | 980   | 17640 | 79380 | .0990 | .9010 | 959   | 17447 | 79359 | 980   | 17404 | 79380 | 236 | .57 |
| 98000 | .15 | .85 | 2205  | 24990 | 70805 | .1490 | .8510 | 2171  | 24791 | 70771 | 2205  | 24723 | 70805 | 267 | .74 |
| 98000 | .20 | .80 | 3920  | 31360 | 62720 | .1991 | .8009 | 3874  | 31165 | 62674 | 3920  | 31074 | 62720 | 286 | .84 |
| 98000 | .25 | .75 | 6125  | 36750 | 55125 | .2492 | .7508 | 6069  | 36564 | 55069 | 6125  | 36453 | 55125 | 297 | .90 |
| 98000 | .30 | .70 | 8820  | 41160 | 48020 | .2994 | .7006 | 8756  | 40984 | 47956 | 8820  | 40857 | 48020 | 303 | .94 |
| 98000 | .35 | .65 | 12005 | 44590 | 41405 | .3495 | .6505 | 11936 | 44423 | 41336 | 12005 | 44284 | 41405 | 306 | .96 |
| 98000 | .40 | .60 | 15680 | 47040 | 35280 | .3997 | .6003 | 15606 | 46881 | 35206 | 15680 | 46733 | 35280 | 307 | .96 |
| 98000 | .45 | .55 | 19845 | 48510 | 29645 | .4498 | .5502 | 19769 | 48355 | 29569 | 19845 | 48203 | 29645 | 307 | .96 |
| 98000 | .50 | .50 | 24500 | 49000 | 24500 | .5000 | .5000 | 24423 | 48847 | 24423 | 24500 | 48693 | 24500 | 307 | .96 |
| 98000 | .55 | .45 | 29645 | 48510 | 19845 | .5502 | .4498 | 29569 | 48355 | 19769 | 29645 | 48203 | 19845 | 307 | .96 |
| 98000 | .60 | .40 | 35280 | 47040 | 15680 | .6003 | .3997 | 35206 | 46881 | 15606 | 35280 | 46733 | 15680 | 307 | .96 |
| 98000 | .65 | .35 | 41405 | 44590 | 12005 | .6505 | .3495 | 41336 | 44423 | 11936 | 41405 | 44284 | 12005 | 306 | .96 |
| 98000 | .70 | .30 | 48020 | 41160 | 8820  | .7006 | .2994 | 47956 | 40984 | 8756  | 48020 | 40857 | 8820  | 303 | .94 |
| 98000 | .75 | .25 | 55125 | 36750 | 6125  | .7508 | .2492 | 55069 | 36564 | 6069  | 55125 | 36453 | 6125  | 297 | .90 |
| 98000 | .80 | .20 | 62720 | 31360 | 3920  | .8009 | .1991 | 62674 | 31165 | 3874  | 62720 | 31074 | 3920  | 286 | .84 |
| 98000 | .85 | .15 | 70805 | 24990 | 2205  | .8510 | .1490 | 70771 | 24791 | 2171  | 70805 | 24723 | 2205  | 267 | .74 |
| 98000 | .90 | .10 | 79380 | 17640 | 980   | .9010 | .0990 | 79359 | 17447 | 959   | 79380 | 17404 | 980   | 236 | .57 |
| 98000 | .95 | .05 | 88445 | 9310  | 245   | .9508 | .0492 | 88437 | 9147  | 237   | 88445 | 9130  | 245   | 180 | .34 |
| 99000 | .05 | .95 | 248   | 9405  | 89348 | .0492 | .9508 | 239   | 9241  | 89339 | 248   | 9224  | 89348 | 181 | .34 |
| 99000 | .10 | .90 | 990   | 17820 | 80190 | .0990 | .9010 | 969   | 17626 | 80169 | 990   | 17583 | 80190 | 237 | .57 |
| 99000 | .15 | .85 | 2228  | 25245 | 71528 | .1490 | .8510 | 2193  | 25045 | 71493 | 2228  | 24976 | 71528 | 269 | .74 |
| 99000 | .20 | .80 | 3960  | 31680 | 63360 | .1991 | .8009 | 3914  | 31484 | 63314 | 3960  | 31392 | 63360 | 288 | .84 |
| 99000 | .25 | .75 | 6188  | 37125 | 55688 | .2492 | .7508 | 6132  | 36938 | 55632 | 6188  | 36826 | 55688 | 299 | .90 |
| 99000 | .30 | .70 | 8910  | 41580 | 48510 | .2994 | .7006 | 8846  | 41403 | 48446 | 8910  | 41276 | 48510 | 304 | .94 |
| 99000 | .35 | .65 | 12128 | 45045 | 41828 | .3495 | .6505 | 12058 | 44878 | 41758 | 12128 | 44738 | 41828 | 307 | .96 |
| 99000 | .40 | .60 | 15840 | 47520 | 35640 | .3997 | .6003 | 15766 | 47360 | 35566 | 15840 | 47212 | 35640 | 308 | .96 |
| 99000 | .45 | .55 | 20048 | 49005 | 29948 | .4498 | .5502 | 19971 | 48849 | 29871 | 20048 | 48697 | 29948 | 308 | .96 |
| 99000 | .50 | .50 | 24750 | 49500 | 24750 | .5000 | .5000 | 24673 | 49346 | 24673 | 24750 | 49192 | 24750 | 308 | .96 |

|        |     |     |       |       |       |       |       |       |       |       |       |       |       |     |     |
|--------|-----|-----|-------|-------|-------|-------|-------|-------|-------|-------|-------|-------|-------|-----|-----|
| 99000  | .55 | .45 | 29948 | 49005 | 20048 | .5502 | .4498 | 29871 | 48849 | 19971 | 29948 | 48697 | 20048 | 308 | .96 |
| 99000  | .60 | .40 | 35640 | 47520 | 15840 | .6003 | .3997 | 35566 | 47360 | 15766 | 35640 | 47212 | 15840 | 308 | .96 |
| 99000  | .65 | .35 | 41828 | 45045 | 12128 | .6505 | .3495 | 41758 | 44878 | 12058 | 41828 | 44738 | 12128 | 307 | .96 |
| 99000  | .70 | .30 | 48510 | 41580 | 8910  | .7006 | .2994 | 48446 | 41403 | 8846  | 48510 | 41276 | 8910  | 304 | .94 |
| 99000  | .75 | .25 | 55688 | 37125 | 6188  | .7508 | .2492 | 55632 | 36938 | 6132  | 55688 | 36826 | 6188  | 299 | .90 |
| 99000  | .80 | .20 | 63360 | 31680 | 3960  | .8009 | .1991 | 63314 | 31484 | 3914  | 63360 | 31392 | 3960  | 288 | .84 |
| 99000  | .85 | .15 | 71528 | 25245 | 2228  | .8510 | .1490 | 71493 | 25045 | 2193  | 71528 | 24976 | 2228  | 269 | .74 |
| 99000  | .90 | .10 | 80190 | 17820 | 990   | .9010 | .0990 | 80169 | 17626 | 969   | 80190 | 17583 | 990   | 237 | .57 |
| 99000  | .95 | .05 | 89348 | 9405  | 248   | .9508 | .0492 | 89339 | 9241  | 239   | 89348 | 9224  | 248   | 181 | .34 |
| 100000 | .05 | .95 | 250   | 9500  | 90250 | .0492 | .9508 | 241   | 9335  | 90241 | 250   | 9318  | 90250 | 182 | .34 |
| 100000 | .10 | .90 | 1000  | 18000 | 81000 | .0990 | .9010 | 979   | 17805 | 80979 | 1000  | 17762 | 81000 | 238 | .57 |
| 100000 | .15 | .85 | 2250  | 25500 | 72250 | .1491 | .8509 | 2216  | 25299 | 72216 | 2250  | 25230 | 72250 | 270 | .74 |
| 100000 | .20 | .80 | 4000  | 32000 | 64000 | .1991 | .8009 | 3954  | 31803 | 63954 | 4000  | 31711 | 64000 | 289 | .84 |
| 100000 | .25 | .75 | 6250  | 37500 | 56250 | .2492 | .7508 | 6194  | 37312 | 56194 | 6250  | 37200 | 56250 | 300 | .90 |
| 100000 | .30 | .70 | 9000  | 42000 | 49000 | .2994 | .7006 | 8936  | 41822 | 48936 | 9000  | 41694 | 49000 | 306 | .94 |
| 100000 | .35 | .65 | 12250 | 45500 | 42250 | .3495 | .6505 | 12180 | 45332 | 42180 | 12250 | 45191 | 42250 | 309 | .96 |
| 100000 | .40 | .60 | 16000 | 48000 | 36000 | .3997 | .6003 | 15926 | 47839 | 35926 | 16000 | 47690 | 36000 | 310 | .96 |
| 100000 | .45 | .55 | 20250 | 49500 | 30250 | .4498 | .5502 | 20173 | 49344 | 30173 | 20250 | 49190 | 30250 | 310 | .96 |
| 100000 | .50 | .50 | 25000 | 50000 | 25000 | .5000 | .5000 | 24923 | 49845 | 24923 | 25000 | 49690 | 25000 | 310 | .96 |
| 100000 | .55 | .45 | 30250 | 49500 | 20250 | .5502 | .4498 | 30173 | 49344 | 20173 | 30250 | 49190 | 20250 | 310 | .96 |
| 100000 | .60 | .40 | 36000 | 48000 | 16000 | .6003 | .3997 | 35926 | 47839 | 15926 | 36000 | 47690 | 16000 | 310 | .96 |
| 100000 | .65 | .35 | 42250 | 45500 | 12250 | .6505 | .3495 | 42180 | 45332 | 12180 | 42250 | 45191 | 12250 | 309 | .96 |
| 100000 | .70 | .30 | 49000 | 42000 | 9000  | .7006 | .2994 | 48936 | 41822 | 8936  | 49000 | 41694 | 9000  | 306 | .94 |
| 100000 | .75 | .25 | 56250 | 37500 | 6250  | .7508 | .2492 | 56194 | 37312 | 6194  | 56250 | 37200 | 6250  | 300 | .90 |
| 100000 | .80 | .20 | 64000 | 32000 | 4000  | .8009 | .1991 | 63954 | 31803 | 3954  | 64000 | 31711 | 4000  | 289 | .84 |
| 100000 | .85 | .15 | 72250 | 25500 | 2250  | .8509 | .1491 | 72216 | 25299 | 2216  | 72250 | 25230 | 2250  | 270 | .74 |
| 100000 | .90 | .10 | 81000 | 18000 | 1000  | .9010 | .0990 | 80979 | 17805 | 979   | 81000 | 17762 | 1000  | 238 | .57 |
| 100000 | .95 | .05 | 90250 | 9500  | 250   | .9508 | .0492 | 90241 | 9335  | 241   | 90250 | 9318  | 250   | 182 | .34 |
