# Supplementary material for: Hardy-Weinberg Equilibrium Testing of Biological Ascertainment for Mendelian Randomization Studies
Source: PubMed Central journal article supplement — Am J Epidemiol. 2009 Jan 6;169(4):505–14. doi: 10.1093/aje/kwn359 (PMC2640163; doi:10.1093/aje/kwn359), 2009-01-06
Supplement: kwn359_7.pdf [file kwn359_7.pdf]

Web Table 5. Summary of deviations from Hardy Weinberg Equilibrium for sample sizes of 5000, 10000, 20000, 50000 and 100000, and for allele frequencies from 0.05 to 0.95 (with increments of 0.05).  $p_{true}$  and  $q_{true}$  are the allele frequencies used to start the simulations. They were also used to estimate the true frequencies of homozygotes (Hz1 True and Hz2 True) and heterozygotes (Het True) assuming HWE.  $p_{false}$  and  $q_{false}$  are the allele frequencies observed after subtracting from the homozygote 1 group a constant number k ranging from 80% to 120%. Hz1 Exp, Het Exp and Hz2 Exp are the expected values of the three genotype groups computed from  $p_{false}$  and  $q_{false}$ . Hz1 Obs are the observed values for Hz1 after subtracting/adding from the homozygote group a constant number k ranging from 80% to 120% (which equates to the number presented in No call).  $\chi^2$  is the HWE  $\chi^2$  value.

| N    | k    | $p_{true}$ | $q_{true}$ | Hz1 True | Het True | Hz2 True | $p_{false}$ | $q_{false}$ | Hz1 Exp | Het Exp | Hz2 Exp | Hz1 Obs | Het Obs | Hz2 Obs | No call | $\chi^2$ |
|------|------|------------|------------|----------|----------|----------|-------------|-------------|---------|---------|---------|---------|---------|---------|---------|----------|
| 5000 | .80  | .05        | .9500      | 13       | 475      | 4513     | .0495       | .9505       | 12      | 470     | 4515    | 10      | 475     | 4513    | 3       | .46      |
| 5000 | .81  | .05        | .9500      | 13       | 475      | 4513     | .0495       | .9505       | 12      | 471     | 4515    | 10      | 475     | 4513    | 2       | .41      |
| 5000 | .82  | .05        | .9500      | 13       | 475      | 4513     | .0496       | .9504       | 12      | 471     | 4515    | 10      | 475     | 4513    | 2       | .37      |
| 5000 | .83  | .05        | .9500      | 13       | 475      | 4513     | .0496       | .9504       | 12      | 471     | 4514    | 10      | 475     | 4513    | 2       | .33      |
| 5000 | .84  | .05        | .9500      | 13       | 475      | 4513     | .0496       | .9504       | 12      | 471     | 4514    | 11      | 475     | 4513    | 2       | .29      |
| 5000 | .85  | .05        | .9500      | 13       | 475      | 4513     | .0496       | .9504       | 12      | 472     | 4514    | 11      | 475     | 4513    | 2       | .26      |
| 5000 | .86  | .05        | .9500      | 13       | 475      | 4513     | .0497       | .9503       | 12      | 472     | 4514    | 11      | 475     | 4513    | 2       | .22      |
| 5000 | .87  | .05        | .9500      | 13       | 475      | 4513     | .0497       | .9503       | 12      | 472     | 4514    | 11      | 475     | 4513    | 2       | .19      |
| 5000 | .88  | .05        | .9500      | 13       | 475      | 4513     | .0497       | .9503       | 12      | 472     | 4514    | 11      | 475     | 4513    | 2       | .16      |
| 5000 | .89  | .05        | .9500      | 13       | 475      | 4513     | .0497       | .9503       | 12      | 473     | 4514    | 11      | 475     | 4513    | 1       | .14      |
| 5000 | .90  | .05        | .9500      | 13       | 475      | 4513     | .0498       | .9502       | 12      | 473     | 4514    | 11      | 475     | 4513    | 1       | .11      |
| 5000 | .91  | .05        | .9500      | 13       | 475      | 4513     | .0498       | .9502       | 12      | 473     | 4514    | 11      | 475     | 4513    | 1       | .09      |
| 5000 | .92  | .05        | .9500      | 13       | 475      | 4513     | .0498       | .9502       | 12      | 473     | 4513    | 12      | 475     | 4513    | 1       | .07      |
| 5000 | .93  | .05        | .9500      | 13       | 475      | 4513     | .0498       | .9502       | 12      | 473     | 4513    | 12      | 475     | 4513    | 1       | .06      |
| 5000 | .94  | .05        | .9500      | 13       | 475      | 4513     | .0499       | .9501       | 12      | 474     | 4513    | 12      | 475     | 4513    | 1       | .04      |
| 5000 | .95  | .05        | .9500      | 13       | 475      | 4513     | .0499       | .9501       | 12      | 474     | 4513    | 12      | 475     | 4513    | 1       | .03      |
| 5000 | .96  | .05        | .9500      | 13       | 475      | 4513     | .0499       | .9501       | 12      | 474     | 4513    | 12      | 475     | 4513    | 1       | .02      |
| 5000 | .97  | .05        | .9500      | 13       | 475      | 4513     | .0499       | .9501       | 12      | 474     | 4513    | 12      | 475     | 4513    | 0       | .01      |
| 5000 | .98  | .05        | .9500      | 13       | 475      | 4513     | .0500       | .9500       | 12      | 475     | 4513    | 12      | 475     | 4513    | 0       | .00      |
| 5000 | .99  | .05        | .9500      | 13       | 475      | 4513     | .0500       | .9500       | 12      | 475     | 4513    | 12      | 475     | 4513    | 0       | .00      |
| 5000 | 1.00 | .05        | .9500      | 13       | 475      | 4513     | .0500       | .9500       | 13      | 475     | 4513    | 13      | 475     | 4513    | 0       | .00      |
| 5000 | 1.01 | .05        | .9500      | 13       | 475      | 4513     | .0500       | .9500       | 13      | 475     | 4512    | 13      | 475     | 4513    | 0       | .00      |
| 5000 | 1.02 | .05        | .9500      | 13       | 475      | 4513     | .0500       | .9500       | 13      | 475     | 4512    | 13      | 475     | 4513    | 0       | .00      |
| 5000 | 1.03 | .05        | .9500      | 13       | 475      | 4513     | .0501       | .9499       | 13      | 476     | 4512    | 13      | 475     | 4513    | 0       | .01      |
| 5000 | 1.04 | .05        | .9500      | 13       | 475      | 4513     | .0501       | .9499       | 13      | 476     | 4512    | 13      | 475     | 4513    | -1      | .02      |

|      |      |     |       |    |     |      |       |       |    |     |      |    |     |      |    |      |
|------|------|-----|-------|----|-----|------|-------|-------|----|-----|------|----|-----|------|----|------|
| 5000 | 1.05 | .05 | .9500 | 13 | 475 | 4513 | .0501 | .9499 | 13 | 476 | 4512 | 13 | 475 | 4513 | -1 | .03  |
| 5000 | 1.06 | .05 | .9500 | 13 | 475 | 4513 | .0501 | .9499 | 13 | 476 | 4512 | 13 | 475 | 4513 | -1 | .04  |
| 5000 | 1.07 | .05 | .9500 | 13 | 475 | 4513 | .0502 | .9498 | 13 | 477 | 4512 | 13 | 475 | 4513 | -1 | .05  |
| 5000 | 1.08 | .05 | .9500 | 13 | 475 | 4513 | .0502 | .9498 | 13 | 477 | 4512 | 14 | 475 | 4513 | -1 | .07  |
| 5000 | 1.09 | .05 | .9500 | 13 | 475 | 4513 | .0502 | .9498 | 13 | 477 | 4511 | 14 | 475 | 4513 | -1 | .09  |
| 5000 | 1.10 | .05 | .9500 | 13 | 475 | 4513 | .0502 | .9498 | 13 | 477 | 4511 | 14 | 475 | 4513 | -1 | .11  |
| 5000 | 1.11 | .05 | .9500 | 13 | 475 | 4513 | .0503 | .9497 | 13 | 477 | 4511 | 14 | 475 | 4513 | -1 | .14  |
| 5000 | 1.12 | .05 | .9500 | 13 | 475 | 4513 | .0503 | .9497 | 13 | 478 | 4511 | 14 | 475 | 4513 | -2 | .16  |
| 5000 | 1.13 | .05 | .9500 | 13 | 475 | 4513 | .0503 | .9497 | 13 | 478 | 4511 | 14 | 475 | 4513 | -2 | .19  |
| 5000 | 1.14 | .05 | .9500 | 13 | 475 | 4513 | .0503 | .9497 | 13 | 478 | 4511 | 14 | 475 | 4513 | -2 | .22  |
| 5000 | 1.15 | .05 | .9500 | 13 | 475 | 4513 | .0504 | .9496 | 13 | 478 | 4511 | 14 | 475 | 4513 | -2 | .25  |
| 5000 | 1.16 | .05 | .9500 | 13 | 475 | 4513 | .0504 | .9496 | 13 | 479 | 4511 | 15 | 475 | 4513 | -2 | .28  |
| 5000 | 1.17 | .05 | .9500 | 13 | 475 | 4513 | .0504 | .9496 | 13 | 479 | 4511 | 15 | 475 | 4513 | -2 | .32  |
| 5000 | 1.18 | .05 | .9500 | 13 | 475 | 4513 | .0504 | .9496 | 13 | 479 | 4510 | 15 | 475 | 4513 | -2 | .36  |
| 5000 | 1.19 | .05 | .9500 | 13 | 475 | 4513 | .0505 | .9495 | 13 | 479 | 4510 | 15 | 475 | 4513 | -2 | .40  |
| 5000 | 1.20 | .05 | .9500 | 13 | 475 | 4513 | .0505 | .9495 | 13 | 480 | 4510 | 15 | 475 | 4513 | -3 | .44  |
| 5000 | .80  | .10 | .9000 | 50 | 900 | 4050 | .0982 | .9018 | 48 | 884 | 4058 | 40 | 900 | 4050 | 10 | 1.68 |
| 5000 | .81  | .10 | .9000 | 50 | 900 | 4050 | .0983 | .9017 | 48 | 885 | 4058 | 41 | 900 | 4050 | 10 | 1.52 |
| 5000 | .82  | .10 | .9000 | 50 | 900 | 4050 | .0984 | .9016 | 48 | 885 | 4057 | 41 | 900 | 4050 | 9  | 1.36 |
| 5000 | .83  | .10 | .9000 | 50 | 900 | 4050 | .0985 | .9015 | 48 | 886 | 4057 | 42 | 900 | 4050 | 9  | 1.21 |
| 5000 | .84  | .10 | .9000 | 50 | 900 | 4050 | .0986 | .9014 | 48 | 887 | 4056 | 42 | 900 | 4050 | 8  | 1.07 |
| 5000 | .85  | .10 | .9000 | 50 | 900 | 4050 | .0986 | .9014 | 49 | 888 | 4056 | 43 | 900 | 4050 | 8  | .94  |
| 5000 | .86  | .10 | .9000 | 50 | 900 | 4050 | .0987 | .9013 | 49 | 889 | 4056 | 43 | 900 | 4050 | 7  | .82  |
| 5000 | .87  | .10 | .9000 | 50 | 900 | 4050 | .0988 | .9012 | 49 | 889 | 4055 | 44 | 900 | 4050 | 7  | .70  |
| 5000 | .88  | .10 | .9000 | 50 | 900 | 4050 | .0989 | .9011 | 49 | 890 | 4055 | 44 | 900 | 4050 | 6  | .60  |
| 5000 | .89  | .10 | .9000 | 50 | 900 | 4050 | .0990 | .9010 | 49 | 891 | 4054 | 45 | 900 | 4050 | 6  | .50  |
| 5000 | .90  | .10 | .9000 | 50 | 900 | 4050 | .0991 | .9009 | 49 | 892 | 4054 | 45 | 900 | 4050 | 5  | .41  |
| 5000 | .91  | .10 | .9000 | 50 | 900 | 4050 | .0992 | .9008 | 49 | 893 | 4054 | 46 | 900 | 4050 | 5  | .33  |
| 5000 | .92  | .10 | .9000 | 50 | 900 | 4050 | .0993 | .9007 | 49 | 894 | 4053 | 46 | 900 | 4050 | 4  | .26  |
| 5000 | .93  | .10 | .9000 | 50 | 900 | 4050 | .0994 | .9006 | 49 | 894 | 4053 | 47 | 900 | 4050 | 4  | .20  |
| 5000 | .94  | .10 | .9000 | 50 | 900 | 4050 | .0995 | .9005 | 49 | 895 | 4052 | 47 | 900 | 4050 | 3  | .15  |
| 5000 | .95  | .10 | .9000 | 50 | 900 | 4050 | .0995 | .9005 | 50 | 896 | 4052 | 48 | 900 | 4050 | 3  | .10  |
| 5000 | .96  | .10 | .9000 | 50 | 900 | 4050 | .0996 | .9004 | 50 | 897 | 4052 | 48 | 900 | 4050 | 2  | .07  |

|      |      |     |       |     |      |      |       |       |     |      |      |    |      |      |     |      |
|------|------|-----|-------|-----|------|------|-------|-------|-----|------|------|----|------|------|-----|------|
| 5000 | .97  | .10 | .9000 | 50  | 900  | 4050 | .0997 | .9003 | 50  | 898  | 4051 | 49 | 900  | 4050 | 2   | .04  |
| 5000 | .98  | .10 | .9000 | 50  | 900  | 4050 | .0998 | .9002 | 50  | 898  | 4051 | 49 | 900  | 4050 | 1   | .02  |
| 5000 | .99  | .10 | .9000 | 50  | 900  | 4050 | .0999 | .9001 | 50  | 899  | 4050 | 50 | 900  | 4050 | 1   | .00  |
| 5000 | 1.00 | .10 | .9000 | 50  | 900  | 4050 | .1000 | .9000 | 50  | 900  | 4050 | 50 | 900  | 4050 | 0   | .00  |
| 5000 | 1.01 | .10 | .9000 | 50  | 900  | 4050 | .1001 | .8999 | 50  | 901  | 4050 | 51 | 900  | 4050 | -1  | .00  |
| 5000 | 1.02 | .10 | .9000 | 50  | 900  | 4050 | .1002 | .8998 | 50  | 902  | 4049 | 51 | 900  | 4050 | -1  | .02  |
| 5000 | 1.03 | .10 | .9000 | 50  | 900  | 4050 | .1003 | .8997 | 50  | 902  | 4049 | 52 | 900  | 4050 | -2  | .04  |
| 5000 | 1.04 | .10 | .9000 | 50  | 900  | 4050 | .1004 | .8996 | 50  | 903  | 4048 | 52 | 900  | 4050 | -2  | .06  |
| 5000 | 1.05 | .10 | .9000 | 50  | 900  | 4050 | .1004 | .8996 | 50  | 904  | 4048 | 53 | 900  | 4050 | -3  | .10  |
| 5000 | 1.06 | .10 | .9000 | 50  | 900  | 4050 | .1005 | .8995 | 51  | 905  | 4048 | 53 | 900  | 4050 | -3  | .14  |
| 5000 | 1.07 | .10 | .9000 | 50  | 900  | 4050 | .1006 | .8994 | 51  | 906  | 4047 | 54 | 900  | 4050 | -4  | .20  |
| 5000 | 1.08 | .10 | .9000 | 50  | 900  | 4050 | .1007 | .8993 | 51  | 906  | 4047 | 54 | 900  | 4050 | -4  | .26  |
| 5000 | 1.09 | .10 | .9000 | 50  | 900  | 4050 | .1008 | .8992 | 51  | 907  | 4046 | 55 | 900  | 4050 | -5  | .32  |
| 5000 | 1.10 | .10 | .9000 | 50  | 900  | 4050 | .1009 | .8991 | 51  | 908  | 4046 | 55 | 900  | 4050 | -5  | .40  |
| 5000 | 1.11 | .10 | .9000 | 50  | 900  | 4050 | .1010 | .8990 | 51  | 909  | 4046 | 56 | 900  | 4050 | -6  | .48  |
| 5000 | 1.12 | .10 | .9000 | 50  | 900  | 4050 | .1011 | .8989 | 51  | 910  | 4045 | 56 | 900  | 4050 | -6  | .57  |
| 5000 | 1.13 | .10 | .9000 | 50  | 900  | 4050 | .1012 | .8988 | 51  | 911  | 4045 | 57 | 900  | 4050 | -7  | .67  |
| 5000 | 1.14 | .10 | .9000 | 50  | 900  | 4050 | .1013 | .8987 | 51  | 911  | 4044 | 57 | 900  | 4050 | -7  | .77  |
| 5000 | 1.15 | .10 | .9000 | 50  | 900  | 4050 | .1013 | .8987 | 51  | 912  | 4044 | 58 | 900  | 4050 | -8  | .89  |
| 5000 | 1.16 | .10 | .9000 | 50  | 900  | 4050 | .1014 | .8986 | 52  | 913  | 4044 | 58 | 900  | 4050 | -8  | 1.01 |
| 5000 | 1.17 | .10 | .9000 | 50  | 900  | 4050 | .1015 | .8985 | 52  | 914  | 4043 | 59 | 900  | 4050 | -9  | 1.13 |
| 5000 | 1.18 | .10 | .9000 | 50  | 900  | 4050 | .1016 | .8984 | 52  | 915  | 4043 | 59 | 900  | 4050 | -9  | 1.27 |
| 5000 | 1.19 | .10 | .9000 | 50  | 900  | 4050 | .1017 | .8983 | 52  | 915  | 4042 | 60 | 900  | 4050 | -10 | 1.41 |
| 5000 | 1.20 | .10 | .9000 | 50  | 900  | 4050 | .1018 | .8982 | 52  | 916  | 4042 | 60 | 900  | 4050 | -10 | 1.56 |
| 5000 | .80  | .15 | .8500 | 113 | 1275 | 3613 | .1462 | .8538 | 106 | 1242 | 3629 | 90 | 1275 | 3613 | 23  | 3.44 |
| 5000 | .81  | .15 | .8500 | 113 | 1275 | 3613 | .1464 | .8536 | 107 | 1244 | 3628 | 91 | 1275 | 3613 | 21  | 3.10 |
| 5000 | .82  | .15 | .8500 | 113 | 1275 | 3613 | .1465 | .8535 | 107 | 1246 | 3627 | 92 | 1275 | 3613 | 20  | 2.77 |
| 5000 | .83  | .15 | .8500 | 113 | 1275 | 3613 | .1467 | .8533 | 107 | 1247 | 3626 | 93 | 1275 | 3613 | 19  | 2.46 |
| 5000 | .84  | .15 | .8500 | 113 | 1275 | 3613 | .1469 | .8531 | 108 | 1249 | 3626 | 95 | 1275 | 3613 | 18  | 2.18 |
| 5000 | .85  | .15 | .8500 | 113 | 1275 | 3613 | .1471 | .8529 | 108 | 1251 | 3625 | 96 | 1275 | 3613 | 17  | 1.91 |
| 5000 | .86  | .15 | .8500 | 113 | 1275 | 3613 | .1473 | .8527 | 108 | 1252 | 3624 | 97 | 1275 | 3613 | 16  | 1.66 |
| 5000 | .87  | .15 | .8500 | 113 | 1275 | 3613 | .1475 | .8525 | 108 | 1254 | 3623 | 98 | 1275 | 3613 | 15  | 1.42 |
| 5000 | .88  | .15 | .8500 | 113 | 1275 | 3613 | .1477 | .8523 | 109 | 1255 | 3622 | 99 | 1275 | 3613 | 14  | 1.21 |

|      |      |     |       |     |      |      |       |       |     |      |      |     |      |      |     |      |
|------|------|-----|-------|-----|------|------|-------|-------|-----|------|------|-----|------|------|-----|------|
| 5000 | .89  | .15 | .8500 | 113 | 1275 | 3613 | .1479 | .8521 | 109 | 1257 | 3621 | 100 | 1275 | 3613 | 12  | 1.01 |
| 5000 | .90  | .15 | .8500 | 113 | 1275 | 3613 | .1481 | .8519 | 109 | 1259 | 3621 | 101 | 1275 | 3613 | 11  | .84  |
| 5000 | .91  | .15 | .8500 | 113 | 1275 | 3613 | .1483 | .8517 | 110 | 1260 | 3620 | 102 | 1275 | 3613 | 10  | .68  |
| 5000 | .92  | .15 | .8500 | 113 | 1275 | 3613 | .1485 | .8515 | 110 | 1262 | 3619 | 104 | 1275 | 3613 | 9   | .53  |
| 5000 | .93  | .15 | .8500 | 113 | 1275 | 3613 | .1487 | .8513 | 110 | 1264 | 3618 | 105 | 1275 | 3613 | 8   | .41  |
| 5000 | .94  | .15 | .8500 | 113 | 1275 | 3613 | .1489 | .8511 | 111 | 1265 | 3617 | 106 | 1275 | 3613 | 7   | .30  |
| 5000 | .95  | .15 | .8500 | 113 | 1275 | 3613 | .1490 | .8510 | 111 | 1267 | 3617 | 107 | 1275 | 3613 | 6   | .21  |
| 5000 | .96  | .15 | .8500 | 113 | 1275 | 3613 | .1492 | .8508 | 111 | 1268 | 3616 | 108 | 1275 | 3613 | 5   | .13  |
| 5000 | .97  | .15 | .8500 | 113 | 1275 | 3613 | .1494 | .8506 | 112 | 1270 | 3615 | 109 | 1275 | 3613 | 3   | .07  |
| 5000 | .98  | .15 | .8500 | 113 | 1275 | 3613 | .1496 | .8504 | 112 | 1272 | 3614 | 110 | 1275 | 3613 | 2   | .03  |
| 5000 | .99  | .15 | .8500 | 113 | 1275 | 3613 | .1498 | .8502 | 112 | 1273 | 3613 | 111 | 1275 | 3613 | 1   | .01  |
| 5000 | 1.00 | .15 | .8500 | 113 | 1275 | 3613 | .1500 | .8500 | 113 | 1275 | 3613 | 113 | 1275 | 3613 | 0   | .00  |
| 5000 | 1.01 | .15 | .8500 | 113 | 1275 | 3613 | .1502 | .8498 | 113 | 1277 | 3612 | 114 | 1275 | 3613 | -1  | .01  |
| 5000 | 1.02 | .15 | .8500 | 113 | 1275 | 3613 | .1504 | .8496 | 113 | 1278 | 3611 | 115 | 1275 | 3613 | -2  | .03  |
| 5000 | 1.03 | .15 | .8500 | 113 | 1275 | 3613 | .1506 | .8494 | 113 | 1280 | 3610 | 116 | 1275 | 3613 | -3  | .07  |
| 5000 | 1.04 | .15 | .8500 | 113 | 1275 | 3613 | .1508 | .8492 | 114 | 1281 | 3609 | 117 | 1275 | 3613 | -5  | .13  |
| 5000 | 1.05 | .15 | .8500 | 113 | 1275 | 3613 | .1510 | .8490 | 114 | 1283 | 3608 | 118 | 1275 | 3613 | -6  | .20  |
| 5000 | 1.06 | .15 | .8500 | 113 | 1275 | 3613 | .1511 | .8489 | 114 | 1285 | 3608 | 119 | 1275 | 3613 | -7  | .29  |
| 5000 | 1.07 | .15 | .8500 | 113 | 1275 | 3613 | .1513 | .8487 | 115 | 1286 | 3607 | 120 | 1275 | 3613 | -8  | .39  |
| 5000 | 1.08 | .15 | .8500 | 113 | 1275 | 3613 | .1515 | .8485 | 115 | 1288 | 3606 | 122 | 1275 | 3613 | -9  | .51  |
| 5000 | 1.09 | .15 | .8500 | 113 | 1275 | 3613 | .1517 | .8483 | 115 | 1290 | 3605 | 123 | 1275 | 3613 | -10 | .64  |
| 5000 | 1.10 | .15 | .8500 | 113 | 1275 | 3613 | .1519 | .8481 | 116 | 1291 | 3604 | 124 | 1275 | 3613 | -11 | .79  |
| 5000 | 1.11 | .15 | .8500 | 113 | 1275 | 3613 | .1521 | .8479 | 116 | 1293 | 3604 | 125 | 1275 | 3613 | -12 | .95  |
| 5000 | 1.12 | .15 | .8500 | 113 | 1275 | 3613 | .1523 | .8477 | 116 | 1294 | 3603 | 126 | 1275 | 3613 | -14 | 1.13 |
| 5000 | 1.13 | .15 | .8500 | 113 | 1275 | 3613 | .1525 | .8475 | 117 | 1296 | 3602 | 127 | 1275 | 3613 | -15 | 1.33 |
| 5000 | 1.14 | .15 | .8500 | 113 | 1275 | 3613 | .1527 | .8473 | 117 | 1298 | 3601 | 128 | 1275 | 3613 | -16 | 1.53 |
| 5000 | 1.15 | .15 | .8500 | 113 | 1275 | 3613 | .1529 | .8471 | 117 | 1299 | 3600 | 129 | 1275 | 3613 | -17 | 1.76 |
| 5000 | 1.16 | .15 | .8500 | 113 | 1275 | 3613 | .1530 | .8470 | 118 | 1301 | 3600 | 131 | 1275 | 3613 | -18 | 1.99 |
| 5000 | 1.17 | .15 | .8500 | 113 | 1275 | 3613 | .1532 | .8468 | 118 | 1303 | 3599 | 132 | 1275 | 3613 | -19 | 2.24 |
| 5000 | 1.18 | .15 | .8500 | 113 | 1275 | 3613 | .1534 | .8466 | 118 | 1304 | 3598 | 133 | 1275 | 3613 | -20 | 2.51 |
| 5000 | 1.19 | .15 | .8500 | 113 | 1275 | 3613 | .1536 | .8464 | 118 | 1306 | 3597 | 134 | 1275 | 3613 | -21 | 2.79 |
| 5000 | 1.20 | .15 | .8500 | 113 | 1275 | 3613 | .1538 | .8462 | 119 | 1307 | 3596 | 135 | 1275 | 3613 | -23 | 3.08 |
| 5000 | .80  | .20 | .8000 | 200 | 1600 | 3200 | .1935 | .8065 | 186 | 1548 | 3226 | 160 | 1600 | 3200 | 40  | 5.51 |

|      |      |     |       |     |      |      |       |       |     |      |      |     |      |      |     |      |
|------|------|-----|-------|-----|------|------|-------|-------|-----|------|------|-----|------|------|-----|------|
| 5000 | .81  | .20 | .8000 | 200 | 1600 | 3200 | .1939 | .8061 | 187 | 1551 | 3225 | 162 | 1600 | 3200 | 38  | 4.96 |
| 5000 | .82  | .20 | .8000 | 200 | 1600 | 3200 | .1942 | .8058 | 187 | 1554 | 3223 | 164 | 1600 | 3200 | 36  | 4.43 |
| 5000 | .83  | .20 | .8000 | 200 | 1600 | 3200 | .1945 | .8055 | 188 | 1556 | 3222 | 166 | 1600 | 3200 | 34  | 3.94 |
| 5000 | .84  | .20 | .8000 | 200 | 1600 | 3200 | .1948 | .8052 | 189 | 1559 | 3221 | 168 | 1600 | 3200 | 32  | 3.47 |
| 5000 | .85  | .20 | .8000 | 200 | 1600 | 3200 | .1952 | .8048 | 189 | 1561 | 3219 | 170 | 1600 | 3200 | 30  | 3.04 |
| 5000 | .86  | .20 | .8000 | 200 | 1600 | 3200 | .1955 | .8045 | 190 | 1564 | 3218 | 172 | 1600 | 3200 | 28  | 2.64 |
| 5000 | .87  | .20 | .8000 | 200 | 1600 | 3200 | .1958 | .8042 | 191 | 1567 | 3217 | 174 | 1600 | 3200 | 26  | 2.27 |
| 5000 | .88  | .20 | .8000 | 200 | 1600 | 3200 | .1961 | .8039 | 191 | 1569 | 3215 | 176 | 1600 | 3200 | 24  | 1.93 |
| 5000 | .89  | .20 | .8000 | 200 | 1600 | 3200 | .1965 | .8035 | 192 | 1572 | 3214 | 178 | 1600 | 3200 | 22  | 1.61 |
| 5000 | .90  | .20 | .8000 | 200 | 1600 | 3200 | .1968 | .8032 | 193 | 1574 | 3213 | 180 | 1600 | 3200 | 20  | 1.33 |
| 5000 | .91  | .20 | .8000 | 200 | 1600 | 3200 | .1971 | .8029 | 194 | 1577 | 3212 | 182 | 1600 | 3200 | 18  | 1.07 |
| 5000 | .92  | .20 | .8000 | 200 | 1600 | 3200 | .1974 | .8026 | 194 | 1579 | 3210 | 184 | 1600 | 3200 | 16  | .84  |
| 5000 | .93  | .20 | .8000 | 200 | 1600 | 3200 | .1978 | .8022 | 195 | 1582 | 3209 | 186 | 1600 | 3200 | 14  | .64  |
| 5000 | .94  | .20 | .8000 | 200 | 1600 | 3200 | .1981 | .8019 | 196 | 1585 | 3208 | 188 | 1600 | 3200 | 12  | .47  |
| 5000 | .95  | .20 | .8000 | 200 | 1600 | 3200 | .1984 | .8016 | 196 | 1587 | 3206 | 190 | 1600 | 3200 | 10  | .33  |
| 5000 | .96  | .20 | .8000 | 200 | 1600 | 3200 | .1987 | .8013 | 197 | 1590 | 3205 | 192 | 1600 | 3200 | 8   | .21  |
| 5000 | .97  | .20 | .8000 | 200 | 1600 | 3200 | .1990 | .8010 | 198 | 1592 | 3204 | 194 | 1600 | 3200 | 6   | .12  |
| 5000 | .98  | .20 | .8000 | 200 | 1600 | 3200 | .1994 | .8006 | 199 | 1595 | 3203 | 196 | 1600 | 3200 | 4   | .05  |
| 5000 | .99  | .20 | .8000 | 200 | 1600 | 3200 | .1997 | .8003 | 199 | 1597 | 3201 | 198 | 1600 | 3200 | 2   | .01  |
| 5000 | 1.00 | .20 | .8000 | 200 | 1600 | 3200 | .2000 | .8000 | 200 | 1600 | 3200 | 200 | 1600 | 3200 | 0   | .00  |
| 5000 | 1.01 | .20 | .8000 | 200 | 1600 | 3200 | .2003 | .7997 | 201 | 1603 | 3199 | 202 | 1600 | 3200 | -2  | .01  |
| 5000 | 1.02 | .20 | .8000 | 200 | 1600 | 3200 | .2006 | .7994 | 201 | 1605 | 3197 | 204 | 1600 | 3200 | -4  | .05  |
| 5000 | 1.03 | .20 | .8000 | 200 | 1600 | 3200 | .2010 | .7990 | 202 | 1608 | 3196 | 206 | 1600 | 3200 | -6  | .11  |
| 5000 | 1.04 | .20 | .8000 | 200 | 1600 | 3200 | .2013 | .7987 | 203 | 1610 | 3195 | 208 | 1600 | 3200 | -8  | .20  |
| 5000 | 1.05 | .20 | .8000 | 200 | 1600 | 3200 | .2016 | .7984 | 204 | 1613 | 3194 | 210 | 1600 | 3200 | -10 | .31  |
| 5000 | 1.06 | .20 | .8000 | 200 | 1600 | 3200 | .2019 | .7981 | 204 | 1615 | 3192 | 212 | 1600 | 3200 | -12 | .45  |
| 5000 | 1.07 | .20 | .8000 | 200 | 1600 | 3200 | .2022 | .7978 | 205 | 1618 | 3191 | 214 | 1600 | 3200 | -14 | .61  |
| 5000 | 1.08 | .20 | .8000 | 200 | 1600 | 3200 | .2026 | .7974 | 206 | 1620 | 3190 | 216 | 1600 | 3200 | -16 | .80  |
| 5000 | 1.09 | .20 | .8000 | 200 | 1600 | 3200 | .2029 | .7971 | 207 | 1623 | 3189 | 218 | 1600 | 3200 | -18 | 1.00 |
| 5000 | 1.10 | .20 | .8000 | 200 | 1600 | 3200 | .2032 | .7968 | 207 | 1625 | 3187 | 220 | 1600 | 3200 | -20 | 1.24 |
| 5000 | 1.11 | .20 | .8000 | 200 | 1600 | 3200 | .2035 | .7965 | 208 | 1628 | 3186 | 222 | 1600 | 3200 | -22 | 1.49 |
| 5000 | 1.12 | .20 | .8000 | 200 | 1600 | 3200 | .2038 | .7962 | 209 | 1631 | 3185 | 224 | 1600 | 3200 | -24 | 1.77 |
| 5000 | 1.13 | .20 | .8000 | 200 | 1600 | 3200 | .2041 | .7959 | 209 | 1633 | 3183 | 226 | 1600 | 3200 | -26 | 2.07 |

|      |      |     |       |     |      |      |       |       |     |      |      |     |      |      |     |      |
|------|------|-----|-------|-----|------|------|-------|-------|-----|------|------|-----|------|------|-----|------|
| 5000 | 1.14 | .20 | .8000 | 200 | 1600 | 3200 | .2045 | .7955 | 210 | 1636 | 3182 | 228 | 1600 | 3200 | -28 | 2.39 |
| 5000 | 1.15 | .20 | .8000 | 200 | 1600 | 3200 | .2048 | .7952 | 211 | 1638 | 3181 | 230 | 1600 | 3200 | -30 | 2.73 |
| 5000 | 1.16 | .20 | .8000 | 200 | 1600 | 3200 | .2051 | .7949 | 212 | 1641 | 3180 | 232 | 1600 | 3200 | -32 | 3.10 |
| 5000 | 1.17 | .20 | .8000 | 200 | 1600 | 3200 | .2054 | .7946 | 212 | 1643 | 3178 | 234 | 1600 | 3200 | -34 | 3.48 |
| 5000 | 1.18 | .20 | .8000 | 200 | 1600 | 3200 | .2057 | .7943 | 213 | 1646 | 3177 | 236 | 1600 | 3200 | -36 | 3.89 |
| 5000 | 1.19 | .20 | .8000 | 200 | 1600 | 3200 | .2060 | .7940 | 214 | 1648 | 3176 | 238 | 1600 | 3200 | -38 | 4.32 |
| 5000 | 1.20 | .20 | .8000 | 200 | 1600 | 3200 | .2063 | .7937 | 215 | 1651 | 3175 | 240 | 1600 | 3200 | -40 | 4.77 |
| 5000 | .80  | .25 | .7500 | 313 | 1875 | 2813 | .2405 | .7595 | 286 | 1804 | 2848 | 250 | 1875 | 2813 | 63  | 7.69 |
| 5000 | .81  | .25 | .7500 | 313 | 1875 | 2813 | .2410 | .7590 | 287 | 1807 | 2846 | 253 | 1875 | 2813 | 59  | 6.91 |
| 5000 | .82  | .25 | .7500 | 313 | 1875 | 2813 | .2415 | .7585 | 288 | 1811 | 2845 | 256 | 1875 | 2813 | 56  | 6.17 |
| 5000 | .83  | .25 | .7500 | 313 | 1875 | 2813 | .2419 | .7581 | 290 | 1815 | 2843 | 259 | 1875 | 2813 | 53  | 5.48 |
| 5000 | .84  | .25 | .7500 | 313 | 1875 | 2813 | .2424 | .7576 | 291 | 1818 | 2841 | 263 | 1875 | 2813 | 50  | 4.83 |
| 5000 | .85  | .25 | .7500 | 313 | 1875 | 2813 | .2429 | .7571 | 292 | 1822 | 2839 | 266 | 1875 | 2813 | 47  | 4.23 |
| 5000 | .86  | .25 | .7500 | 313 | 1875 | 2813 | .2434 | .7566 | 294 | 1825 | 2837 | 269 | 1875 | 2813 | 44  | 3.67 |
| 5000 | .87  | .25 | .7500 | 313 | 1875 | 2813 | .2439 | .7561 | 295 | 1829 | 2836 | 272 | 1875 | 2813 | 41  | 3.15 |
| 5000 | .88  | .25 | .7500 | 313 | 1875 | 2813 | .2443 | .7557 | 296 | 1832 | 2834 | 275 | 1875 | 2813 | 38  | 2.67 |
| 5000 | .89  | .25 | .7500 | 313 | 1875 | 2813 | .2448 | .7552 | 298 | 1836 | 2832 | 278 | 1875 | 2813 | 34  | 2.23 |
| 5000 | .90  | .25 | .7500 | 313 | 1875 | 2813 | .2453 | .7547 | 299 | 1840 | 2830 | 281 | 1875 | 2813 | 31  | 1.84 |
| 5000 | .91  | .25 | .7500 | 313 | 1875 | 2813 | .2458 | .7542 | 300 | 1843 | 2828 | 284 | 1875 | 2813 | 28  | 1.48 |
| 5000 | .92  | .25 | .7500 | 313 | 1875 | 2813 | .2462 | .7538 | 302 | 1847 | 2827 | 288 | 1875 | 2813 | 25  | 1.17 |
| 5000 | .93  | .25 | .7500 | 313 | 1875 | 2813 | .2467 | .7533 | 303 | 1850 | 2825 | 291 | 1875 | 2813 | 22  | .89  |
| 5000 | .94  | .25 | .7500 | 313 | 1875 | 2813 | .2472 | .7528 | 304 | 1854 | 2823 | 294 | 1875 | 2813 | 19  | .65  |
| 5000 | .95  | .25 | .7500 | 313 | 1875 | 2813 | .2476 | .7524 | 306 | 1857 | 2821 | 297 | 1875 | 2813 | 16  | .45  |
| 5000 | .96  | .25 | .7500 | 313 | 1875 | 2813 | .2481 | .7519 | 307 | 1861 | 2820 | 300 | 1875 | 2813 | 13  | .29  |
| 5000 | .97  | .25 | .7500 | 313 | 1875 | 2813 | .2486 | .7514 | 308 | 1864 | 2818 | 303 | 1875 | 2813 | 9   | .16  |
| 5000 | .98  | .25 | .7500 | 313 | 1875 | 2813 | .2491 | .7509 | 310 | 1868 | 2816 | 306 | 1875 | 2813 | 6   | .07  |
| 5000 | .99  | .25 | .7500 | 313 | 1875 | 2813 | .2495 | .7505 | 311 | 1871 | 2814 | 309 | 1875 | 2813 | 3   | .02  |
| 5000 | 1.00 | .25 | .7500 | 313 | 1875 | 2813 | .2500 | .7500 | 313 | 1875 | 2813 | 313 | 1875 | 2813 | 0   | .00  |
| 5000 | 1.01 | .25 | .7500 | 313 | 1875 | 2813 | .2505 | .7495 | 314 | 1879 | 2811 | 316 | 1875 | 2813 | -3  | .02  |
| 5000 | 1.02 | .25 | .7500 | 313 | 1875 | 2813 | .2509 | .7491 | 315 | 1882 | 2809 | 319 | 1875 | 2813 | -6  | .07  |
| 5000 | 1.03 | .25 | .7500 | 313 | 1875 | 2813 | .2514 | .7486 | 317 | 1886 | 2807 | 322 | 1875 | 2813 | -9  | .16  |
| 5000 | 1.04 | .25 | .7500 | 313 | 1875 | 2813 | .2519 | .7481 | 318 | 1889 | 2805 | 325 | 1875 | 2813 | -13 | .28  |
| 5000 | 1.05 | .25 | .7500 | 313 | 1875 | 2813 | .2523 | .7477 | 319 | 1893 | 2804 | 328 | 1875 | 2813 | -16 | .43  |

|      |      |     |       |     |      |      |       |       |     |      |      |     |      |      |     |      |
|------|------|-----|-------|-----|------|------|-------|-------|-----|------|------|-----|------|------|-----|------|
| 5000 | 1.06 | .25 | .7500 | 313 | 1875 | 2813 | .2528 | .7472 | 321 | 1896 | 2802 | 331 | 1875 | 2813 | -19 | .62  |
| 5000 | 1.07 | .25 | .7500 | 313 | 1875 | 2813 | .2533 | .7467 | 322 | 1900 | 2800 | 334 | 1875 | 2813 | -22 | .84  |
| 5000 | 1.08 | .25 | .7500 | 313 | 1875 | 2813 | .2537 | .7463 | 324 | 1903 | 2799 | 338 | 1875 | 2813 | -25 | 1.09 |
| 5000 | 1.09 | .25 | .7500 | 313 | 1875 | 2813 | .2542 | .7458 | 325 | 1906 | 2797 | 341 | 1875 | 2813 | -28 | 1.37 |
| 5000 | 1.10 | .25 | .7500 | 313 | 1875 | 2813 | .2547 | .7453 | 326 | 1910 | 2795 | 344 | 1875 | 2813 | -31 | 1.68 |
| 5000 | 1.11 | .25 | .7500 | 313 | 1875 | 2813 | .2551 | .7449 | 328 | 1913 | 2793 | 347 | 1875 | 2813 | -34 | 2.03 |
| 5000 | 1.12 | .25 | .7500 | 313 | 1875 | 2813 | .2556 | .7444 | 329 | 1917 | 2792 | 350 | 1875 | 2813 | -38 | 2.40 |
| 5000 | 1.13 | .25 | .7500 | 313 | 1875 | 2813 | .2560 | .7440 | 330 | 1920 | 2790 | 353 | 1875 | 2813 | -41 | 2.81 |
| 5000 | 1.14 | .25 | .7500 | 313 | 1875 | 2813 | .2565 | .7435 | 332 | 1924 | 2788 | 356 | 1875 | 2813 | -44 | 3.24 |
| 5000 | 1.15 | .25 | .7500 | 313 | 1875 | 2813 | .2570 | .7430 | 333 | 1927 | 2786 | 359 | 1875 | 2813 | -47 | 3.71 |
| 5000 | 1.16 | .25 | .7500 | 313 | 1875 | 2813 | .2574 | .7426 | 335 | 1931 | 2785 | 363 | 1875 | 2813 | -50 | 4.20 |
| 5000 | 1.17 | .25 | .7500 | 313 | 1875 | 2813 | .2579 | .7421 | 336 | 1934 | 2783 | 366 | 1875 | 2813 | -53 | 4.72 |
| 5000 | 1.18 | .25 | .7500 | 313 | 1875 | 2813 | .2583 | .7417 | 337 | 1938 | 2781 | 369 | 1875 | 2813 | -56 | 5.27 |
| 5000 | 1.19 | .25 | .7500 | 313 | 1875 | 2813 | .2588 | .7412 | 339 | 1941 | 2779 | 372 | 1875 | 2813 | -59 | 5.85 |
| 5000 | 1.20 | .25 | .7500 | 313 | 1875 | 2813 | .2593 | .7407 | 340 | 1944 | 2778 | 375 | 1875 | 2813 | -63 | 6.46 |
| 5000 | .80  | .30 | .7000 | 450 | 2100 | 2450 | .2872 | .7128 | 405 | 2010 | 2495 | 360 | 2100 | 2450 | 90  | 9.80 |
| 5000 | .81  | .30 | .7000 | 450 | 2100 | 2450 | .2878 | .7122 | 407 | 2015 | 2493 | 365 | 2100 | 2450 | 86  | 8.80 |
| 5000 | .82  | .30 | .7000 | 450 | 2100 | 2450 | .2885 | .7115 | 409 | 2019 | 2490 | 369 | 2100 | 2450 | 81  | 7.85 |
| 5000 | .83  | .30 | .7000 | 450 | 2100 | 2450 | .2891 | .7109 | 412 | 2024 | 2488 | 374 | 2100 | 2450 | 77  | 6.97 |
| 5000 | .84  | .30 | .7000 | 450 | 2100 | 2450 | .2898 | .7102 | 414 | 2028 | 2486 | 378 | 2100 | 2450 | 72  | 6.14 |
| 5000 | .85  | .30 | .7000 | 450 | 2100 | 2450 | .2904 | .7096 | 416 | 2033 | 2484 | 383 | 2100 | 2450 | 68  | 5.37 |
| 5000 | .86  | .30 | .7000 | 450 | 2100 | 2450 | .2911 | .7089 | 418 | 2037 | 2481 | 387 | 2100 | 2450 | 63  | 4.65 |
| 5000 | .87  | .30 | .7000 | 450 | 2100 | 2450 | .2917 | .7083 | 421 | 2042 | 2479 | 392 | 2100 | 2450 | 59  | 3.99 |
| 5000 | .88  | .30 | .7000 | 450 | 2100 | 2450 | .2924 | .7076 | 423 | 2047 | 2477 | 396 | 2100 | 2450 | 54  | 3.38 |
| 5000 | .89  | .30 | .7000 | 450 | 2100 | 2450 | .2930 | .7070 | 425 | 2051 | 2474 | 401 | 2100 | 2450 | 50  | 2.83 |
| 5000 | .90  | .30 | .7000 | 450 | 2100 | 2450 | .2936 | .7064 | 427 | 2055 | 2472 | 405 | 2100 | 2450 | 45  | 2.32 |
| 5000 | .91  | .30 | .7000 | 450 | 2100 | 2450 | .2943 | .7057 | 430 | 2060 | 2470 | 410 | 2100 | 2450 | 41  | 1.87 |
| 5000 | .92  | .30 | .7000 | 450 | 2100 | 2450 | .2949 | .7051 | 432 | 2064 | 2468 | 414 | 2100 | 2450 | 36  | 1.47 |
| 5000 | .93  | .30 | .7000 | 450 | 2100 | 2450 | .2956 | .7044 | 434 | 2069 | 2466 | 419 | 2100 | 2450 | 32  | 1.12 |
| 5000 | .94  | .30 | .7000 | 450 | 2100 | 2450 | .2962 | .7038 | 436 | 2073 | 2463 | 423 | 2100 | 2450 | 27  | .82  |
| 5000 | .95  | .30 | .7000 | 450 | 2100 | 2450 | .2968 | .7032 | 439 | 2078 | 2461 | 428 | 2100 | 2450 | 23  | .57  |
| 5000 | .96  | .30 | .7000 | 450 | 2100 | 2450 | .2975 | .7025 | 441 | 2082 | 2459 | 432 | 2100 | 2450 | 18  | .36  |
| 5000 | .97  | .30 | .7000 | 450 | 2100 | 2450 | .2981 | .7019 | 443 | 2087 | 2457 | 437 | 2100 | 2450 | 14  | .20  |

|      |      |     |       |     |      |      |       |       |     |      |      |     |      |      |     |       |
|------|------|-----|-------|-----|------|------|-------|-------|-----|------|------|-----|------|------|-----|-------|
| 5000 | .98  | .30 | .7000 | 450 | 2100 | 2450 | .2987 | .7013 | 445 | 2091 | 2454 | 441 | 2100 | 2450 | 9   | .09   |
| 5000 | .99  | .30 | .7000 | 450 | 2100 | 2450 | .2994 | .7006 | 448 | 2096 | 2452 | 446 | 2100 | 2450 | 5   | .02   |
| 5000 | 1.00 | .30 | .7000 | 450 | 2100 | 2450 | .3000 | .7000 | 450 | 2100 | 2450 | 450 | 2100 | 2450 | 0   | .00   |
| 5000 | 1.01 | .30 | .7000 | 450 | 2100 | 2450 | .3006 | .6994 | 452 | 2104 | 2448 | 455 | 2100 | 2450 | -5  | .02   |
| 5000 | 1.02 | .30 | .7000 | 450 | 2100 | 2450 | .3013 | .6987 | 455 | 2109 | 2446 | 459 | 2100 | 2450 | -9  | .09   |
| 5000 | 1.03 | .30 | .7000 | 450 | 2100 | 2450 | .3019 | .6981 | 457 | 2113 | 2443 | 464 | 2100 | 2450 | -14 | .20   |
| 5000 | 1.04 | .30 | .7000 | 450 | 2100 | 2450 | .3025 | .6975 | 459 | 2118 | 2441 | 468 | 2100 | 2450 | -18 | .35   |
| 5000 | 1.05 | .30 | .7000 | 450 | 2100 | 2450 | .3031 | .6969 | 462 | 2122 | 2439 | 473 | 2100 | 2450 | -23 | .54   |
| 5000 | 1.06 | .30 | .7000 | 450 | 2100 | 2450 | .3038 | .6962 | 464 | 2126 | 2437 | 477 | 2100 | 2450 | -27 | .77   |
| 5000 | 1.07 | .30 | .7000 | 450 | 2100 | 2450 | .3044 | .6956 | 466 | 2131 | 2435 | 482 | 2100 | 2450 | -32 | 1.04  |
| 5000 | 1.08 | .30 | .7000 | 450 | 2100 | 2450 | .3050 | .6950 | 468 | 2135 | 2432 | 486 | 2100 | 2450 | -36 | 1.36  |
| 5000 | 1.09 | .30 | .7000 | 450 | 2100 | 2450 | .3056 | .6944 | 471 | 2139 | 2430 | 491 | 2100 | 2450 | -41 | 1.71  |
| 5000 | 1.10 | .30 | .7000 | 450 | 2100 | 2450 | .3062 | .6938 | 473 | 2144 | 2428 | 495 | 2100 | 2450 | -45 | 2.10  |
| 5000 | 1.11 | .30 | .7000 | 450 | 2100 | 2450 | .3069 | .6931 | 475 | 2148 | 2426 | 500 | 2100 | 2450 | -50 | 2.53  |
| 5000 | 1.12 | .30 | .7000 | 450 | 2100 | 2450 | .3075 | .6925 | 478 | 2152 | 2424 | 504 | 2100 | 2450 | -54 | 2.99  |
| 5000 | 1.13 | .30 | .7000 | 450 | 2100 | 2450 | .3081 | .6919 | 480 | 2157 | 2422 | 509 | 2100 | 2450 | -59 | 3.49  |
| 5000 | 1.14 | .30 | .7000 | 450 | 2100 | 2450 | .3087 | .6913 | 483 | 2161 | 2420 | 513 | 2100 | 2450 | -63 | 4.03  |
| 5000 | 1.15 | .30 | .7000 | 450 | 2100 | 2450 | .3093 | .6907 | 485 | 2165 | 2417 | 518 | 2100 | 2450 | -68 | 4.60  |
| 5000 | 1.16 | .30 | .7000 | 450 | 2100 | 2450 | .3099 | .6901 | 487 | 2170 | 2415 | 522 | 2100 | 2450 | -72 | 5.21  |
| 5000 | 1.17 | .30 | .7000 | 450 | 2100 | 2450 | .3105 | .6895 | 490 | 2174 | 2413 | 527 | 2100 | 2450 | -77 | 5.86  |
| 5000 | 1.18 | .30 | .7000 | 450 | 2100 | 2450 | .3112 | .6888 | 492 | 2178 | 2411 | 531 | 2100 | 2450 | -81 | 6.54  |
| 5000 | 1.19 | .30 | .7000 | 450 | 2100 | 2450 | .3118 | .6882 | 494 | 2182 | 2409 | 536 | 2100 | 2450 | -86 | 7.25  |
| 5000 | 1.20 | .30 | .7000 | 450 | 2100 | 2450 | .3124 | .6876 | 497 | 2187 | 2407 | 540 | 2100 | 2450 | -90 | 7.99  |
| 5000 | .80  | .35 | .6500 | 613 | 2275 | 2113 | .3337 | .6663 | 543 | 2169 | 2166 | 490 | 2275 | 2113 | 123 | 11.67 |
| 5000 | .81  | .35 | .6500 | 613 | 2275 | 2113 | .3345 | .6655 | 546 | 2174 | 2163 | 496 | 2275 | 2113 | 116 | 10.47 |
| 5000 | .82  | .35 | .6500 | 613 | 2275 | 2113 | .3353 | .6647 | 550 | 2180 | 2160 | 502 | 2275 | 2113 | 110 | 9.34  |
| 5000 | .83  | .35 | .6500 | 613 | 2275 | 2113 | .3362 | .6638 | 553 | 2185 | 2157 | 508 | 2275 | 2113 | 104 | 8.28  |
| 5000 | .84  | .35 | .6500 | 613 | 2275 | 2113 | .3370 | .6630 | 557 | 2191 | 2155 | 515 | 2275 | 2113 | 98  | 7.29  |
| 5000 | .85  | .35 | .6500 | 613 | 2275 | 2113 | .3378 | .6622 | 560 | 2196 | 2152 | 521 | 2275 | 2113 | 92  | 6.37  |
| 5000 | .86  | .35 | .6500 | 613 | 2275 | 2113 | .3387 | .6613 | 564 | 2201 | 2149 | 527 | 2275 | 2113 | 86  | 5.51  |
| 5000 | .87  | .35 | .6500 | 613 | 2275 | 2113 | .3395 | .6605 | 567 | 2207 | 2147 | 533 | 2275 | 2113 | 80  | 4.72  |
| 5000 | .88  | .35 | .6500 | 613 | 2275 | 2113 | .3403 | .6597 | 571 | 2212 | 2144 | 539 | 2275 | 2113 | 74  | 4.00  |
| 5000 | .89  | .35 | .6500 | 613 | 2275 | 2113 | .3411 | .6589 | 574 | 2217 | 2141 | 545 | 2275 | 2113 | 67  | 3.34  |



|      |      |     |       |     |      |      |       |       |     |      |      |     |      |      |      |       |
|------|------|-----|-------|-----|------|------|-------|-------|-----|------|------|-----|------|------|------|-------|
| 5000 | .90  | .35 | .6500 | 613 | 2275 | 2113 | .3419 | .6581 | 577 | 2223 | 2139 | 551 | 2275 | 2113 | 61   | 2.74  |
| 5000 | .91  | .35 | .6500 | 613 | 2275 | 2113 | .3428 | .6572 | 581 | 2228 | 2136 | 557 | 2275 | 2113 | 55   | 2.21  |
| 5000 | .92  | .35 | .6500 | 613 | 2275 | 2113 | .3436 | .6564 | 584 | 2233 | 2133 | 564 | 2275 | 2113 | 49   | 1.74  |
| 5000 | .93  | .35 | .6500 | 613 | 2275 | 2113 | .3444 | .6556 | 588 | 2238 | 2131 | 570 | 2275 | 2113 | 43   | 1.32  |
| 5000 | .94  | .35 | .6500 | 613 | 2275 | 2113 | .3452 | .6548 | 591 | 2244 | 2128 | 576 | 2275 | 2113 | 37   | .96   |
| 5000 | .95  | .35 | .6500 | 613 | 2275 | 2113 | .3460 | .6540 | 595 | 2249 | 2126 | 582 | 2275 | 2113 | 31   | .67   |
| 5000 | .96  | .35 | .6500 | 613 | 2275 | 2113 | .3468 | .6532 | 598 | 2254 | 2123 | 588 | 2275 | 2113 | 25   | .42   |
| 5000 | .97  | .35 | .6500 | 613 | 2275 | 2113 | .3476 | .6524 | 602 | 2259 | 2120 | 594 | 2275 | 2113 | 18   | .24   |
| 5000 | .98  | .35 | .6500 | 613 | 2275 | 2113 | .3484 | .6516 | 605 | 2265 | 2118 | 600 | 2275 | 2113 | 12   | .10   |
| 5000 | .99  | .35 | .6500 | 613 | 2275 | 2113 | .3492 | .6508 | 609 | 2270 | 2115 | 606 | 2275 | 2113 | 6    | .03   |
| 5000 | 1.00 | .35 | .6500 | 613 | 2275 | 2113 | .3500 | .6500 | 613 | 2275 | 2113 | 613 | 2275 | 2113 | 0    | .00   |
| 5000 | 1.01 | .35 | .6500 | 613 | 2275 | 2113 | .3508 | .6492 | 616 | 2280 | 2110 | 619 | 2275 | 2113 | -6   | .03   |
| 5000 | 1.02 | .35 | .6500 | 613 | 2275 | 2113 | .3516 | .6484 | 620 | 2285 | 2107 | 625 | 2275 | 2113 | -12  | .10   |
| 5000 | 1.03 | .35 | .6500 | 613 | 2275 | 2113 | .3524 | .6476 | 623 | 2290 | 2105 | 631 | 2275 | 2113 | -18  | .23   |
| 5000 | 1.04 | .35 | .6500 | 613 | 2275 | 2113 | .3532 | .6468 | 627 | 2296 | 2102 | 637 | 2275 | 2113 | -25  | .40   |
| 5000 | 1.05 | .35 | .6500 | 613 | 2275 | 2113 | .3540 | .6460 | 630 | 2301 | 2100 | 643 | 2275 | 2113 | -31  | .63   |
| 5000 | 1.06 | .35 | .6500 | 613 | 2275 | 2113 | .3547 | .6453 | 634 | 2306 | 2097 | 649 | 2275 | 2113 | -37  | .90   |
| 5000 | 1.07 | .35 | .6500 | 613 | 2275 | 2113 | .3555 | .6445 | 637 | 2311 | 2095 | 655 | 2275 | 2113 | -43  | 1.22  |
| 5000 | 1.08 | .35 | .6500 | 613 | 2275 | 2113 | .3563 | .6437 | 641 | 2316 | 2092 | 662 | 2275 | 2113 | -49  | 1.58  |
| 5000 | 1.09 | .35 | .6500 | 613 | 2275 | 2113 | .3571 | .6429 | 645 | 2321 | 2089 | 668 | 2275 | 2113 | -55  | 1.99  |
| 5000 | 1.10 | .35 | .6500 | 613 | 2275 | 2113 | .3579 | .6421 | 648 | 2326 | 2087 | 674 | 2275 | 2113 | -61  | 2.45  |
| 5000 | 1.11 | .35 | .6500 | 613 | 2275 | 2113 | .3586 | .6414 | 652 | 2331 | 2084 | 680 | 2275 | 2113 | -67  | 2.94  |
| 5000 | 1.12 | .35 | .6500 | 613 | 2275 | 2113 | .3594 | .6406 | 655 | 2336 | 2082 | 686 | 2275 | 2113 | -74  | 3.48  |
| 5000 | 1.13 | .35 | .6500 | 613 | 2275 | 2113 | .3602 | .6398 | 659 | 2341 | 2079 | 692 | 2275 | 2113 | -80  | 4.06  |
| 5000 | 1.14 | .35 | .6500 | 613 | 2275 | 2113 | .3610 | .6390 | 663 | 2346 | 2077 | 698 | 2275 | 2113 | -86  | 4.69  |
| 5000 | 1.15 | .35 | .6500 | 613 | 2275 | 2113 | .3617 | .6383 | 666 | 2351 | 2074 | 704 | 2275 | 2113 | -92  | 5.35  |
| 5000 | 1.16 | .35 | .6500 | 613 | 2275 | 2113 | .3625 | .6375 | 670 | 2356 | 2072 | 711 | 2275 | 2113 | -98  | 6.06  |
| 5000 | 1.17 | .35 | .6500 | 613 | 2275 | 2113 | .3633 | .6367 | 674 | 2361 | 2069 | 717 | 2275 | 2113 | -104 | 6.80  |
| 5000 | 1.18 | .35 | .6500 | 613 | 2275 | 2113 | .3640 | .6360 | 677 | 2366 | 2067 | 723 | 2275 | 2113 | -110 | 7.58  |
| 5000 | 1.19 | .35 | .6500 | 613 | 2275 | 2113 | .3648 | .6352 | 681 | 2371 | 2064 | 729 | 2275 | 2113 | -116 | 8.40  |
| 5000 | 1.20 | .35 | .6500 | 613 | 2275 | 2113 | .3655 | .6345 | 684 | 2376 | 2062 | 735 | 2275 | 2113 | -123 | 9.26  |
| 5000 | .80  | .40 | .6000 | 800 | 2400 | 1800 | .3802 | .6198 | 700 | 2281 | 1860 | 640 | 2400 | 1800 | 160  | 13.18 |
| 5000 | .81  | .40 | .6000 | 800 | 2400 | 1800 | .3812 | .6188 | 704 | 2287 | 1856 | 648 | 2400 | 1800 | 152  | 11.81 |

|      |      |     |       |     |      |      |       |       |     |      |      |     |      |      |      |       |
|------|------|-----|-------|-----|------|------|-------|-------|-----|------|------|-----|------|------|------|-------|
| 5000 | .82  | .40 | .6000 | 800 | 2400 | 1800 | .3822 | .6178 | 709 | 2293 | 1853 | 656 | 2400 | 1800 | 144  | 10.52 |
| 5000 | .83  | .40 | .6000 | 800 | 2400 | 1800 | .3832 | .6168 | 714 | 2299 | 1850 | 664 | 2400 | 1800 | 136  | 9.32  |
| 5000 | .84  | .40 | .6000 | 800 | 2400 | 1800 | .3842 | .6158 | 719 | 2305 | 1847 | 672 | 2400 | 1800 | 128  | 8.20  |
| 5000 | .85  | .40 | .6000 | 800 | 2400 | 1800 | .3852 | .6148 | 724 | 2311 | 1844 | 680 | 2400 | 1800 | 120  | 7.16  |
| 5000 | .86  | .40 | .6000 | 800 | 2400 | 1800 | .3863 | .6137 | 729 | 2318 | 1841 | 688 | 2400 | 1800 | 112  | 6.19  |
| 5000 | .87  | .40 | .6000 | 800 | 2400 | 1800 | .3873 | .6127 | 734 | 2324 | 1838 | 696 | 2400 | 1800 | 104  | 5.30  |
| 5000 | .88  | .40 | .6000 | 800 | 2400 | 1800 | .3883 | .6117 | 739 | 2330 | 1835 | 704 | 2400 | 1800 | 96   | 4.49  |
| 5000 | .89  | .40 | .6000 | 800 | 2400 | 1800 | .3893 | .6107 | 744 | 2336 | 1832 | 712 | 2400 | 1800 | 88   | 3.75  |
| 5000 | .90  | .40 | .6000 | 800 | 2400 | 1800 | .3902 | .6098 | 749 | 2341 | 1829 | 720 | 2400 | 1800 | 80   | 3.08  |
| 5000 | .91  | .40 | .6000 | 800 | 2400 | 1800 | .3912 | .6088 | 754 | 2347 | 1826 | 728 | 2400 | 1800 | 72   | 2.47  |
| 5000 | .92  | .40 | .6000 | 800 | 2400 | 1800 | .3922 | .6078 | 759 | 2353 | 1823 | 736 | 2400 | 1800 | 64   | 1.94  |
| 5000 | .93  | .40 | .6000 | 800 | 2400 | 1800 | .3932 | .6068 | 764 | 2359 | 1820 | 744 | 2400 | 1800 | 56   | 1.48  |
| 5000 | .94  | .40 | .6000 | 800 | 2400 | 1800 | .3942 | .6058 | 769 | 2365 | 1817 | 752 | 2400 | 1800 | 48   | 1.08  |
| 5000 | .95  | .40 | .6000 | 800 | 2400 | 1800 | .3952 | .6048 | 775 | 2371 | 1815 | 760 | 2400 | 1800 | 40   | .74   |
| 5000 | .96  | .40 | .6000 | 800 | 2400 | 1800 | .3961 | .6039 | 780 | 2377 | 1812 | 768 | 2400 | 1800 | 32   | .47   |
| 5000 | .97  | .40 | .6000 | 800 | 2400 | 1800 | .3971 | .6029 | 785 | 2383 | 1809 | 776 | 2400 | 1800 | 24   | .26   |
| 5000 | .98  | .40 | .6000 | 800 | 2400 | 1800 | .3981 | .6019 | 790 | 2388 | 1806 | 784 | 2400 | 1800 | 16   | .12   |
| 5000 | .99  | .40 | .6000 | 800 | 2400 | 1800 | .3990 | .6010 | 795 | 2394 | 1803 | 792 | 2400 | 1800 | 8    | .03   |
| 5000 | 1.00 | .40 | .6000 | 800 | 2400 | 1800 | .4000 | .6000 | 800 | 2400 | 1800 | 800 | 2400 | 1800 | 0    | .00   |
| 5000 | 1.01 | .40 | .6000 | 800 | 2400 | 1800 | .4010 | .5990 | 805 | 2406 | 1797 | 808 | 2400 | 1800 | -8   | .03   |
| 5000 | 1.02 | .40 | .6000 | 800 | 2400 | 1800 | .4019 | .5981 | 810 | 2411 | 1794 | 816 | 2400 | 1800 | -16  | .11   |
| 5000 | 1.03 | .40 | .6000 | 800 | 2400 | 1800 | .4029 | .5971 | 815 | 2417 | 1791 | 824 | 2400 | 1800 | -24  | .25   |
| 5000 | 1.04 | .40 | .6000 | 800 | 2400 | 1800 | .4038 | .5962 | 821 | 2423 | 1789 | 832 | 2400 | 1800 | -32  | .45   |
| 5000 | 1.05 | .40 | .6000 | 800 | 2400 | 1800 | .4048 | .5952 | 826 | 2429 | 1786 | 840 | 2400 | 1800 | -40  | .70   |
| 5000 | 1.06 | .40 | .6000 | 800 | 2400 | 1800 | .4057 | .5943 | 831 | 2434 | 1783 | 848 | 2400 | 1800 | -48  | 1.00  |
| 5000 | 1.07 | .40 | .6000 | 800 | 2400 | 1800 | .4066 | .5934 | 836 | 2440 | 1780 | 856 | 2400 | 1800 | -56  | 1.35  |
| 5000 | 1.08 | .40 | .6000 | 800 | 2400 | 1800 | .4076 | .5924 | 841 | 2445 | 1777 | 864 | 2400 | 1800 | -64  | 1.75  |
| 5000 | 1.09 | .40 | .6000 | 800 | 2400 | 1800 | .4085 | .5915 | 846 | 2451 | 1774 | 872 | 2400 | 1800 | -72  | 2.20  |
| 5000 | 1.10 | .40 | .6000 | 800 | 2400 | 1800 | .4094 | .5906 | 852 | 2457 | 1772 | 880 | 2400 | 1800 | -80  | 2.71  |
| 5000 | 1.11 | .40 | .6000 | 800 | 2400 | 1800 | .4104 | .5896 | 857 | 2462 | 1769 | 888 | 2400 | 1800 | -88  | 3.25  |
| 5000 | 1.12 | .40 | .6000 | 800 | 2400 | 1800 | .4113 | .5887 | 862 | 2468 | 1766 | 896 | 2400 | 1800 | -96  | 3.85  |
| 5000 | 1.13 | .40 | .6000 | 800 | 2400 | 1800 | .4122 | .5878 | 867 | 2473 | 1763 | 904 | 2400 | 1800 | -104 | 4.49  |
| 5000 | 1.14 | .40 | .6000 | 800 | 2400 | 1800 | .4131 | .5869 | 873 | 2479 | 1761 | 912 | 2400 | 1800 | -112 | 5.18  |

|      |      |     |       |      |      |      |       |       |      |      |      |      |      |      |      |       |
|------|------|-----|-------|------|------|------|-------|-------|------|------|------|------|------|------|------|-------|
| 5000 | 1.15 | .40 | .6000 | 800  | 2400 | 1800 | .4141 | .5859 | 878  | 2484 | 1758 | 920  | 2400 | 1800 | -120 | 5.91  |
| 5000 | 1.16 | .40 | .6000 | 800  | 2400 | 1800 | .4150 | .5850 | 883  | 2490 | 1755 | 928  | 2400 | 1800 | -128 | 6.68  |
| 5000 | 1.17 | .40 | .6000 | 800  | 2400 | 1800 | .4159 | .5841 | 888  | 2495 | 1752 | 936  | 2400 | 1800 | -136 | 7.50  |
| 5000 | 1.18 | .40 | .6000 | 800  | 2400 | 1800 | .4168 | .5832 | 894  | 2501 | 1750 | 944  | 2400 | 1800 | -144 | 8.35  |
| 5000 | 1.19 | .40 | .6000 | 800  | 2400 | 1800 | .4177 | .5823 | 899  | 2506 | 1747 | 952  | 2400 | 1800 | -152 | 9.25  |
| 5000 | 1.20 | .40 | .6000 | 800  | 2400 | 1800 | .4186 | .5814 | 904  | 2512 | 1744 | 960  | 2400 | 1800 | -160 | 10.19 |
| 5000 | .80  | .45 | .5500 | 1013 | 2475 | 1513 | .4268 | .5732 | 874  | 2347 | 1576 | 810  | 2475 | 1513 | 203  | 14.20 |
| 5000 | .81  | .45 | .5500 | 1013 | 2475 | 1513 | .4280 | .5720 | 881  | 2354 | 1573 | 820  | 2475 | 1513 | 192  | 12.71 |
| 5000 | .82  | .45 | .5500 | 1013 | 2475 | 1513 | .4292 | .5708 | 887  | 2361 | 1570 | 830  | 2475 | 1513 | 182  | 11.32 |
| 5000 | .83  | .45 | .5500 | 1013 | 2475 | 1513 | .4304 | .5696 | 894  | 2367 | 1566 | 840  | 2475 | 1513 | 172  | 10.02 |
| 5000 | .84  | .45 | .5500 | 1013 | 2475 | 1513 | .4316 | .5684 | 901  | 2374 | 1563 | 851  | 2475 | 1513 | 162  | 8.81  |
| 5000 | .85  | .45 | .5500 | 1013 | 2475 | 1513 | .4328 | .5672 | 908  | 2380 | 1560 | 861  | 2475 | 1513 | 152  | 7.68  |
| 5000 | .86  | .45 | .5500 | 1013 | 2475 | 1513 | .4340 | .5660 | 915  | 2387 | 1557 | 871  | 2475 | 1513 | 142  | 6.64  |
| 5000 | .87  | .45 | .5500 | 1013 | 2475 | 1513 | .4351 | .5649 | 922  | 2393 | 1553 | 881  | 2475 | 1513 | 132  | 5.69  |
| 5000 | .88  | .45 | .5500 | 1013 | 2475 | 1513 | .4363 | .5637 | 929  | 2400 | 1550 | 891  | 2475 | 1513 | 122  | 4.81  |
| 5000 | .89  | .45 | .5500 | 1013 | 2475 | 1513 | .4375 | .5625 | 936  | 2406 | 1547 | 901  | 2475 | 1513 | 111  | 4.01  |
| 5000 | .90  | .45 | .5500 | 1013 | 2475 | 1513 | .4386 | .5614 | 943  | 2412 | 1544 | 911  | 2475 | 1513 | 101  | 3.29  |
| 5000 | .91  | .45 | .5500 | 1013 | 2475 | 1513 | .4398 | .5602 | 949  | 2419 | 1541 | 921  | 2475 | 1513 | 91   | 2.65  |
| 5000 | .92  | .45 | .5500 | 1013 | 2475 | 1513 | .4409 | .5591 | 956  | 2425 | 1537 | 932  | 2475 | 1513 | 81   | 2.08  |
| 5000 | .93  | .45 | .5500 | 1013 | 2475 | 1513 | .4421 | .5579 | 963  | 2432 | 1534 | 942  | 2475 | 1513 | 71   | 1.58  |
| 5000 | .94  | .45 | .5500 | 1013 | 2475 | 1513 | .4432 | .5568 | 970  | 2438 | 1531 | 952  | 2475 | 1513 | 61   | 1.15  |
| 5000 | .95  | .45 | .5500 | 1013 | 2475 | 1513 | .4444 | .5556 | 977  | 2444 | 1528 | 962  | 2475 | 1513 | 51   | .79   |
| 5000 | .96  | .45 | .5500 | 1013 | 2475 | 1513 | .4455 | .5545 | 984  | 2450 | 1525 | 972  | 2475 | 1513 | 41   | .50   |
| 5000 | .97  | .45 | .5500 | 1013 | 2475 | 1513 | .4466 | .5534 | 991  | 2457 | 1522 | 982  | 2475 | 1513 | 30   | .28   |
| 5000 | .98  | .45 | .5500 | 1013 | 2475 | 1513 | .4478 | .5522 | 998  | 2463 | 1519 | 992  | 2475 | 1513 | 20   | .12   |
| 5000 | .99  | .45 | .5500 | 1013 | 2475 | 1513 | .4489 | .5511 | 1005 | 2469 | 1516 | 1002 | 2475 | 1513 | 10   | .03   |
| 5000 | 1.00 | .45 | .5500 | 1013 | 2475 | 1513 | .4500 | .5500 | 1013 | 2475 | 1513 | 1013 | 2475 | 1513 | 0    | .00   |
| 5000 | 1.01 | .45 | .5500 | 1013 | 2475 | 1513 | .4511 | .5489 | 1020 | 2481 | 1509 | 1023 | 2475 | 1513 | -10  | .03   |
| 5000 | 1.02 | .45 | .5500 | 1013 | 2475 | 1513 | .4522 | .5478 | 1027 | 2487 | 1506 | 1033 | 2475 | 1513 | -20  | .12   |
| 5000 | 1.03 | .45 | .5500 | 1013 | 2475 | 1513 | .4533 | .5467 | 1034 | 2493 | 1503 | 1043 | 2475 | 1513 | -30  | .27   |
| 5000 | 1.04 | .45 | .5500 | 1013 | 2475 | 1513 | .4544 | .5456 | 1041 | 2499 | 1500 | 1053 | 2475 | 1513 | -41  | .48   |
| 5000 | 1.05 | .45 | .5500 | 1013 | 2475 | 1513 | .4555 | .5445 | 1048 | 2505 | 1497 | 1063 | 2475 | 1513 | -51  | .74   |
| 5000 | 1.06 | .45 | .5500 | 1013 | 2475 | 1513 | .4566 | .5434 | 1055 | 2511 | 1494 | 1073 | 2475 | 1513 | -61  | 1.06  |

|      |      |     |       |      |      |      |       |       |      |      |      |      |      |      |      |       |
|------|------|-----|-------|------|------|------|-------|-------|------|------|------|------|------|------|------|-------|
| 5000 | 1.07 | .45 | .5500 | 1013 | 2475 | 1513 | .4577 | .5423 | 1062 | 2517 | 1491 | 1083 | 2475 | 1513 | -71  | 1.43  |
| 5000 | 1.08 | .45 | .5500 | 1013 | 2475 | 1513 | .4588 | .5412 | 1069 | 2523 | 1488 | 1094 | 2475 | 1513 | -81  | 1.86  |
| 5000 | 1.09 | .45 | .5500 | 1013 | 2475 | 1513 | .4598 | .5402 | 1077 | 2529 | 1485 | 1104 | 2475 | 1513 | -91  | 2.33  |
| 5000 | 1.10 | .45 | .5500 | 1013 | 2475 | 1513 | .4609 | .5391 | 1084 | 2535 | 1482 | 1114 | 2475 | 1513 | -101 | 2.86  |
| 5000 | 1.11 | .45 | .5500 | 1013 | 2475 | 1513 | .4620 | .5380 | 1091 | 2541 | 1480 | 1124 | 2475 | 1513 | -111 | 3.44  |
| 5000 | 1.12 | .45 | .5500 | 1013 | 2475 | 1513 | .4630 | .5370 | 1098 | 2547 | 1477 | 1134 | 2475 | 1513 | -122 | 4.07  |
| 5000 | 1.13 | .45 | .5500 | 1013 | 2475 | 1513 | .4641 | .5359 | 1105 | 2553 | 1474 | 1144 | 2475 | 1513 | -132 | 4.74  |
| 5000 | 1.14 | .45 | .5500 | 1013 | 2475 | 1513 | .4652 | .5348 | 1113 | 2558 | 1471 | 1154 | 2475 | 1513 | -142 | 5.46  |
| 5000 | 1.15 | .45 | .5500 | 1013 | 2475 | 1513 | .4662 | .5338 | 1120 | 2564 | 1468 | 1164 | 2475 | 1513 | -152 | 6.23  |
| 5000 | 1.16 | .45 | .5500 | 1013 | 2475 | 1513 | .4673 | .5327 | 1127 | 2570 | 1465 | 1175 | 2475 | 1513 | -162 | 7.04  |
| 5000 | 1.17 | .45 | .5500 | 1013 | 2475 | 1513 | .4683 | .5317 | 1134 | 2576 | 1462 | 1185 | 2475 | 1513 | -172 | 7.90  |
| 5000 | 1.18 | .45 | .5500 | 1013 | 2475 | 1513 | .4693 | .5307 | 1142 | 2581 | 1459 | 1195 | 2475 | 1513 | -182 | 8.80  |
| 5000 | 1.19 | .45 | .5500 | 1013 | 2475 | 1513 | .4704 | .5296 | 1149 | 2587 | 1456 | 1205 | 2475 | 1513 | -192 | 9.74  |
| 5000 | 1.20 | .45 | .5500 | 1013 | 2475 | 1513 | .4714 | .5286 | 1156 | 2593 | 1454 | 1215 | 2475 | 1513 | -203 | 10.73 |
| 5000 | .80  | .50 | .5000 | 1250 | 2500 | 1250 | .4737 | .5263 | 1066 | 2368 | 1316 | 1000 | 2500 | 1250 | 250  | 14.66 |
| 5000 | .81  | .50 | .5000 | 1250 | 2500 | 1250 | .4751 | .5249 | 1075 | 2375 | 1312 | 1013 | 2500 | 1250 | 238  | 13.12 |
| 5000 | .82  | .50 | .5000 | 1250 | 2500 | 1250 | .4764 | .5236 | 1084 | 2382 | 1309 | 1025 | 2500 | 1250 | 225  | 11.68 |
| 5000 | .83  | .50 | .5000 | 1250 | 2500 | 1250 | .4778 | .5222 | 1093 | 2389 | 1305 | 1038 | 2500 | 1250 | 213  | 10.33 |
| 5000 | .84  | .50 | .5000 | 1250 | 2500 | 1250 | .4792 | .5208 | 1102 | 2396 | 1302 | 1050 | 2500 | 1250 | 200  | 9.07  |
| 5000 | .85  | .50 | .5000 | 1250 | 2500 | 1250 | .4805 | .5195 | 1111 | 2403 | 1299 | 1063 | 2500 | 1250 | 188  | 7.91  |
| 5000 | .86  | .50 | .5000 | 1250 | 2500 | 1250 | .4819 | .5181 | 1120 | 2409 | 1295 | 1075 | 2500 | 1250 | 175  | 6.83  |
| 5000 | .87  | .50 | .5000 | 1250 | 2500 | 1250 | .4832 | .5168 | 1129 | 2416 | 1292 | 1088 | 2500 | 1250 | 163  | 5.84  |
| 5000 | .88  | .50 | .5000 | 1250 | 2500 | 1250 | .4845 | .5155 | 1139 | 2423 | 1289 | 1100 | 2500 | 1250 | 150  | 4.94  |
| 5000 | .89  | .50 | .5000 | 1250 | 2500 | 1250 | .4859 | .5141 | 1148 | 2429 | 1285 | 1113 | 2500 | 1250 | 138  | 4.12  |
| 5000 | .90  | .50 | .5000 | 1250 | 2500 | 1250 | .4872 | .5128 | 1157 | 2436 | 1282 | 1125 | 2500 | 1250 | 125  | 3.38  |
| 5000 | .91  | .50 | .5000 | 1250 | 2500 | 1250 | .4885 | .5115 | 1166 | 2442 | 1279 | 1138 | 2500 | 1250 | 113  | 2.71  |
| 5000 | .92  | .50 | .5000 | 1250 | 2500 | 1250 | .4898 | .5102 | 1176 | 2449 | 1276 | 1150 | 2500 | 1250 | 100  | 2.13  |
| 5000 | .93  | .50 | .5000 | 1250 | 2500 | 1250 | .4911 | .5089 | 1185 | 2455 | 1272 | 1163 | 2500 | 1250 | 88   | 1.62  |
| 5000 | .94  | .50 | .5000 | 1250 | 2500 | 1250 | .4924 | .5076 | 1194 | 2462 | 1269 | 1175 | 2500 | 1250 | 75   | 1.18  |
| 5000 | .95  | .50 | .5000 | 1250 | 2500 | 1250 | .4937 | .5063 | 1203 | 2468 | 1266 | 1188 | 2500 | 1250 | 63   | .81   |
| 5000 | .96  | .50 | .5000 | 1250 | 2500 | 1250 | .4949 | .5051 | 1213 | 2475 | 1263 | 1200 | 2500 | 1250 | 50   | .52   |
| 5000 | .97  | .50 | .5000 | 1250 | 2500 | 1250 | .4962 | .5038 | 1222 | 2481 | 1259 | 1213 | 2500 | 1250 | 38   | .29   |
| 5000 | .98  | .50 | .5000 | 1250 | 2500 | 1250 | .4975 | .5025 | 1231 | 2487 | 1256 | 1225 | 2500 | 1250 | 25   | .13   |

|      |      |     |       |      |      |      |       |       |      |      |      |      |      |      |      |       |
|------|------|-----|-------|------|------|------|-------|-------|------|------|------|------|------|------|------|-------|
| 5000 | .99  | .50 | .5000 | 1250 | 2500 | 1250 | .4987 | .5013 | 1241 | 2494 | 1253 | 1238 | 2500 | 1250 | 13   | .03   |
| 5000 | 1.00 | .50 | .5000 | 1250 | 2500 | 1250 | .5000 | .5000 | 1250 | 2500 | 1250 | 1250 | 2500 | 1250 | 0    | .00   |
| 5000 | 1.01 | .50 | .5000 | 1250 | 2500 | 1250 | .5012 | .4988 | 1259 | 2506 | 1247 | 1263 | 2500 | 1250 | -13  | .03   |
| 5000 | 1.02 | .50 | .5000 | 1250 | 2500 | 1250 | .5025 | .4975 | 1269 | 2512 | 1244 | 1275 | 2500 | 1250 | -25  | .12   |
| 5000 | 1.03 | .50 | .5000 | 1250 | 2500 | 1250 | .5037 | .4963 | 1278 | 2519 | 1241 | 1288 | 2500 | 1250 | -38  | .28   |
| 5000 | 1.04 | .50 | .5000 | 1250 | 2500 | 1250 | .5050 | .4950 | 1288 | 2525 | 1238 | 1300 | 2500 | 1250 | -50  | .49   |
| 5000 | 1.05 | .50 | .5000 | 1250 | 2500 | 1250 | .5062 | .4938 | 1297 | 2531 | 1235 | 1313 | 2500 | 1250 | -63  | .75   |
| 5000 | 1.06 | .50 | .5000 | 1250 | 2500 | 1250 | .5074 | .4926 | 1307 | 2537 | 1232 | 1325 | 2500 | 1250 | -75  | 1.08  |
| 5000 | 1.07 | .50 | .5000 | 1250 | 2500 | 1250 | .5086 | .4914 | 1316 | 2543 | 1229 | 1338 | 2500 | 1250 | -88  | 1.45  |
| 5000 | 1.08 | .50 | .5000 | 1250 | 2500 | 1250 | .5098 | .4902 | 1325 | 2549 | 1225 | 1350 | 2500 | 1250 | -100 | 1.89  |
| 5000 | 1.09 | .50 | .5000 | 1250 | 2500 | 1250 | .5110 | .4890 | 1335 | 2555 | 1222 | 1363 | 2500 | 1250 | -113 | 2.37  |
| 5000 | 1.10 | .50 | .5000 | 1250 | 2500 | 1250 | .5122 | .4878 | 1345 | 2561 | 1220 | 1375 | 2500 | 1250 | -125 | 2.91  |
| 5000 | 1.11 | .50 | .5000 | 1250 | 2500 | 1250 | .5134 | .4866 | 1354 | 2567 | 1217 | 1388 | 2500 | 1250 | -138 | 3.49  |
| 5000 | 1.12 | .50 | .5000 | 1250 | 2500 | 1250 | .5146 | .4854 | 1364 | 2573 | 1214 | 1400 | 2500 | 1250 | -150 | 4.13  |
| 5000 | 1.13 | .50 | .5000 | 1250 | 2500 | 1250 | .5157 | .4843 | 1373 | 2579 | 1211 | 1413 | 2500 | 1250 | -163 | 4.81  |
| 5000 | 1.14 | .50 | .5000 | 1250 | 2500 | 1250 | .5169 | .4831 | 1383 | 2585 | 1208 | 1425 | 2500 | 1250 | -175 | 5.54  |
| 5000 | 1.15 | .50 | .5000 | 1250 | 2500 | 1250 | .5181 | .4819 | 1392 | 2590 | 1205 | 1438 | 2500 | 1250 | -188 | 6.31  |
| 5000 | 1.16 | .50 | .5000 | 1250 | 2500 | 1250 | .5192 | .4808 | 1402 | 2596 | 1202 | 1450 | 2500 | 1250 | -200 | 7.13  |
| 5000 | 1.17 | .50 | .5000 | 1250 | 2500 | 1250 | .5204 | .4796 | 1412 | 2602 | 1199 | 1463 | 2500 | 1250 | -213 | 8.00  |
| 5000 | 1.18 | .50 | .5000 | 1250 | 2500 | 1250 | .5215 | .4785 | 1421 | 2608 | 1196 | 1475 | 2500 | 1250 | -225 | 8.91  |
| 5000 | 1.19 | .50 | .5000 | 1250 | 2500 | 1250 | .5227 | .4773 | 1431 | 2613 | 1193 | 1488 | 2500 | 1250 | -238 | 9.86  |
| 5000 | 1.20 | .50 | .5000 | 1250 | 2500 | 1250 | .5238 | .4762 | 1440 | 2619 | 1190 | 1500 | 2500 | 1250 | -250 | 10.85 |
| 5000 | .80  | .55 | .4500 | 1513 | 2475 | 1013 | .5210 | .4790 | 1275 | 2345 | 1078 | 1210 | 2475 | 1013 | 303  | 14.53 |
| 5000 | .81  | .55 | .4500 | 1513 | 2475 | 1013 | .5226 | .4774 | 1287 | 2352 | 1074 | 1225 | 2475 | 1013 | 287  | 13.00 |
| 5000 | .82  | .55 | .4500 | 1513 | 2475 | 1013 | .5241 | .4759 | 1299 | 2358 | 1071 | 1240 | 2475 | 1013 | 272  | 11.56 |
| 5000 | .83  | .55 | .4500 | 1513 | 2475 | 1013 | .5256 | .4744 | 1310 | 2365 | 1067 | 1255 | 2475 | 1013 | 257  | 10.22 |
| 5000 | .84  | .55 | .4500 | 1513 | 2475 | 1013 | .5271 | .4729 | 1322 | 2372 | 1064 | 1271 | 2475 | 1013 | 242  | 8.97  |
| 5000 | .85  | .55 | .4500 | 1513 | 2475 | 1013 | .5286 | .4714 | 1334 | 2379 | 1061 | 1286 | 2475 | 1013 | 227  | 7.81  |
| 5000 | .86  | .55 | .4500 | 1513 | 2475 | 1013 | .5301 | .4699 | 1346 | 2385 | 1057 | 1301 | 2475 | 1013 | 212  | 6.75  |
| 5000 | .87  | .55 | .4500 | 1513 | 2475 | 1013 | .5316 | .4684 | 1357 | 2392 | 1054 | 1316 | 2475 | 1013 | 197  | 5.77  |
| 5000 | .88  | .55 | .4500 | 1513 | 2475 | 1013 | .5330 | .4670 | 1369 | 2399 | 1051 | 1331 | 2475 | 1013 | 182  | 4.87  |
| 5000 | .89  | .55 | .4500 | 1513 | 2475 | 1013 | .5345 | .4655 | 1381 | 2405 | 1047 | 1346 | 2475 | 1013 | 166  | 4.06  |
| 5000 | .90  | .55 | .4500 | 1513 | 2475 | 1013 | .5360 | .4640 | 1393 | 2412 | 1044 | 1361 | 2475 | 1013 | 151  | 3.33  |

|      |      |     |       |      |      |      |       |       |      |      |      |      |      |      |      |       |
|------|------|-----|-------|------|------|------|-------|-------|------|------|------|------|------|------|------|-------|
| 5000 | .91  | .55 | .4500 | 1513 | 2475 | 1013 | .5374 | .4626 | 1405 | 2418 | 1041 | 1376 | 2475 | 1013 | 136  | 2.67  |
| 5000 | .92  | .55 | .4500 | 1513 | 2475 | 1013 | .5388 | .4612 | 1417 | 2425 | 1038 | 1392 | 2475 | 1013 | 121  | 2.09  |
| 5000 | .93  | .55 | .4500 | 1513 | 2475 | 1013 | .5403 | .4597 | 1429 | 2431 | 1034 | 1407 | 2475 | 1013 | 106  | 1.59  |
| 5000 | .94  | .55 | .4500 | 1513 | 2475 | 1013 | .5417 | .4583 | 1440 | 2438 | 1031 | 1422 | 2475 | 1013 | 91   | 1.16  |
| 5000 | .95  | .55 | .4500 | 1513 | 2475 | 1013 | .5431 | .4569 | 1452 | 2444 | 1028 | 1437 | 2475 | 1013 | 76   | .80   |
| 5000 | .96  | .55 | .4500 | 1513 | 2475 | 1013 | .5445 | .4555 | 1464 | 2450 | 1025 | 1452 | 2475 | 1013 | 61   | .51   |
| 5000 | .97  | .55 | .4500 | 1513 | 2475 | 1013 | .5459 | .4541 | 1476 | 2456 | 1022 | 1467 | 2475 | 1013 | 45   | .28   |
| 5000 | .98  | .55 | .4500 | 1513 | 2475 | 1013 | .5473 | .4527 | 1488 | 2463 | 1019 | 1482 | 2475 | 1013 | 30   | .12   |
| 5000 | .99  | .55 | .4500 | 1513 | 2475 | 1013 | .5486 | .4514 | 1500 | 2469 | 1016 | 1497 | 2475 | 1013 | 15   | .03   |
| 5000 | 1.00 | .55 | .4500 | 1513 | 2475 | 1013 | .5500 | .4500 | 1513 | 2475 | 1013 | 1513 | 2475 | 1013 | 0    | .00   |
| 5000 | 1.01 | .55 | .4500 | 1513 | 2475 | 1013 | .5514 | .4486 | 1525 | 2481 | 1009 | 1528 | 2475 | 1013 | -15  | .03   |
| 5000 | 1.02 | .55 | .4500 | 1513 | 2475 | 1013 | .5527 | .4473 | 1537 | 2487 | 1006 | 1543 | 2475 | 1013 | -30  | .12   |
| 5000 | 1.03 | .55 | .4500 | 1513 | 2475 | 1013 | .5540 | .4460 | 1549 | 2493 | 1003 | 1558 | 2475 | 1013 | -45  | .27   |
| 5000 | 1.04 | .55 | .4500 | 1513 | 2475 | 1013 | .5554 | .4446 | 1561 | 2499 | 1000 | 1573 | 2475 | 1013 | -61  | .47   |
| 5000 | 1.05 | .55 | .4500 | 1513 | 2475 | 1013 | .5567 | .4433 | 1573 | 2505 | 997  | 1588 | 2475 | 1013 | -76  | .74   |
| 5000 | 1.06 | .55 | .4500 | 1513 | 2475 | 1013 | .5580 | .4420 | 1585 | 2511 | 994  | 1603 | 2475 | 1013 | -91  | 1.05  |
| 5000 | 1.07 | .55 | .4500 | 1513 | 2475 | 1013 | .5593 | .4407 | 1597 | 2517 | 992  | 1618 | 2475 | 1013 | -106 | 1.42  |
| 5000 | 1.08 | .55 | .4500 | 1513 | 2475 | 1013 | .5606 | .4394 | 1610 | 2523 | 989  | 1634 | 2475 | 1013 | -121 | 1.84  |
| 5000 | 1.09 | .55 | .4500 | 1513 | 2475 | 1013 | .5619 | .4381 | 1622 | 2529 | 986  | 1649 | 2475 | 1013 | -136 | 2.31  |
| 5000 | 1.10 | .55 | .4500 | 1513 | 2475 | 1013 | .5632 | .4368 | 1634 | 2534 | 983  | 1664 | 2475 | 1013 | -151 | 2.84  |
| 5000 | 1.11 | .55 | .4500 | 1513 | 2475 | 1013 | .5645 | .4355 | 1646 | 2540 | 980  | 1679 | 2475 | 1013 | -166 | 3.40  |
| 5000 | 1.12 | .55 | .4500 | 1513 | 2475 | 1013 | .5658 | .4342 | 1659 | 2546 | 977  | 1694 | 2475 | 1013 | -182 | 4.02  |
| 5000 | 1.13 | .55 | .4500 | 1513 | 2475 | 1013 | .5670 | .4330 | 1671 | 2552 | 974  | 1709 | 2475 | 1013 | -197 | 4.69  |
| 5000 | 1.14 | .55 | .4500 | 1513 | 2475 | 1013 | .5683 | .4317 | 1683 | 2557 | 971  | 1724 | 2475 | 1013 | -212 | 5.39  |
| 5000 | 1.15 | .55 | .4500 | 1513 | 2475 | 1013 | .5695 | .4305 | 1695 | 2563 | 969  | 1739 | 2475 | 1013 | -227 | 6.15  |
| 5000 | 1.16 | .55 | .4500 | 1513 | 2475 | 1013 | .5708 | .4292 | 1708 | 2568 | 966  | 1755 | 2475 | 1013 | -242 | 6.94  |
| 5000 | 1.17 | .55 | .4500 | 1513 | 2475 | 1013 | .5720 | .4280 | 1720 | 2574 | 963  | 1770 | 2475 | 1013 | -257 | 7.78  |
| 5000 | 1.18 | .55 | .4500 | 1513 | 2475 | 1013 | .5732 | .4268 | 1732 | 2580 | 960  | 1785 | 2475 | 1013 | -272 | 8.66  |
| 5000 | 1.19 | .55 | .4500 | 1513 | 2475 | 1013 | .5745 | .4255 | 1745 | 2585 | 957  | 1800 | 2475 | 1013 | -287 | 9.58  |
| 5000 | 1.20 | .55 | .4500 | 1513 | 2475 | 1013 | .5757 | .4243 | 1757 | 2591 | 955  | 1815 | 2475 | 1013 | -303 | 10.54 |
| 5000 | .80  | .60 | .4000 | 1800 | 2400 | 800  | .5690 | .4310 | 1502 | 2276 | 862  | 1440 | 2400 | 800  | 360  | 13.80 |
| 5000 | .81  | .60 | .4000 | 1800 | 2400 | 800  | .5706 | .4294 | 1517 | 2283 | 859  | 1458 | 2400 | 800  | 342  | 12.34 |
| 5000 | .82  | .60 | .4000 | 1800 | 2400 | 800  | .5723 | .4277 | 1531 | 2289 | 855  | 1476 | 2400 | 800  | 324  | 10.97 |

|      |      |     |       |      |      |     |       |       |      |      |     |      |      |     |      |      |
|------|------|-----|-------|------|------|-----|-------|-------|------|------|-----|------|------|-----|------|------|
| 5000 | .83  | .60 | .4000 | 1800 | 2400 | 800 | .5739 | .4261 | 1546 | 2296 | 852 | 1494 | 2400 | 800 | 306  | 9.69 |
| 5000 | .84  | .60 | .4000 | 1800 | 2400 | 800 | .5756 | .4244 | 1561 | 2302 | 849 | 1512 | 2400 | 800 | 288  | 8.50 |
| 5000 | .85  | .60 | .4000 | 1800 | 2400 | 800 | .5772 | .4228 | 1576 | 2309 | 846 | 1530 | 2400 | 800 | 270  | 7.40 |
| 5000 | .86  | .60 | .4000 | 1800 | 2400 | 800 | .5788 | .4212 | 1590 | 2315 | 842 | 1548 | 2400 | 800 | 252  | 6.39 |
| 5000 | .87  | .60 | .4000 | 1800 | 2400 | 800 | .5804 | .4196 | 1605 | 2321 | 839 | 1566 | 2400 | 800 | 234  | 5.46 |
| 5000 | .88  | .60 | .4000 | 1800 | 2400 | 800 | .5819 | .4181 | 1620 | 2328 | 836 | 1584 | 2400 | 800 | 216  | 4.61 |
| 5000 | .89  | .60 | .4000 | 1800 | 2400 | 800 | .5835 | .4165 | 1635 | 2334 | 833 | 1602 | 2400 | 800 | 198  | 3.84 |
| 5000 | .90  | .60 | .4000 | 1800 | 2400 | 800 | .5851 | .4149 | 1650 | 2340 | 830 | 1620 | 2400 | 800 | 180  | 3.14 |
| 5000 | .91  | .60 | .4000 | 1800 | 2400 | 800 | .5866 | .4134 | 1665 | 2346 | 827 | 1638 | 2400 | 800 | 162  | 2.52 |
| 5000 | .92  | .60 | .4000 | 1800 | 2400 | 800 | .5881 | .4119 | 1680 | 2353 | 824 | 1656 | 2400 | 800 | 144  | 1.98 |
| 5000 | .93  | .60 | .4000 | 1800 | 2400 | 800 | .5897 | .4103 | 1695 | 2359 | 821 | 1674 | 2400 | 800 | 126  | 1.50 |
| 5000 | .94  | .60 | .4000 | 1800 | 2400 | 800 | .5912 | .4088 | 1710 | 2365 | 818 | 1692 | 2400 | 800 | 108  | 1.09 |
| 5000 | .95  | .60 | .4000 | 1800 | 2400 | 800 | .5927 | .4073 | 1725 | 2371 | 815 | 1710 | 2400 | 800 | 90   | .75  |
| 5000 | .96  | .60 | .4000 | 1800 | 2400 | 800 | .5942 | .4058 | 1740 | 2377 | 812 | 1728 | 2400 | 800 | 72   | .48  |
| 5000 | .97  | .60 | .4000 | 1800 | 2400 | 800 | .5956 | .4044 | 1755 | 2383 | 809 | 1746 | 2400 | 800 | 54   | .27  |
| 5000 | .98  | .60 | .4000 | 1800 | 2400 | 800 | .5971 | .4029 | 1770 | 2388 | 806 | 1764 | 2400 | 800 | 36   | .12  |
| 5000 | .99  | .60 | .4000 | 1800 | 2400 | 800 | .5986 | .4014 | 1785 | 2394 | 803 | 1782 | 2400 | 800 | 18   | .03  |
| 5000 | 1.00 | .60 | .4000 | 1800 | 2400 | 800 | .6000 | .4000 | 1800 | 2400 | 800 | 1800 | 2400 | 800 | 0    | .00  |
| 5000 | 1.01 | .60 | .4000 | 1800 | 2400 | 800 | .6014 | .3986 | 1815 | 2406 | 797 | 1818 | 2400 | 800 | -18  | .03  |
| 5000 | 1.02 | .60 | .4000 | 1800 | 2400 | 800 | .6029 | .3971 | 1830 | 2411 | 794 | 1836 | 2400 | 800 | -36  | .11  |
| 5000 | 1.03 | .60 | .4000 | 1800 | 2400 | 800 | .6043 | .3957 | 1845 | 2417 | 791 | 1854 | 2400 | 800 | -54  | .25  |
| 5000 | 1.04 | .60 | .4000 | 1800 | 2400 | 800 | .6057 | .3943 | 1861 | 2423 | 789 | 1872 | 2400 | 800 | -72  | .45  |
| 5000 | 1.05 | .60 | .4000 | 1800 | 2400 | 800 | .6071 | .3929 | 1876 | 2428 | 786 | 1890 | 2400 | 800 | -90  | .69  |
| 5000 | 1.06 | .60 | .4000 | 1800 | 2400 | 800 | .6085 | .3915 | 1891 | 2434 | 783 | 1908 | 2400 | 800 | -108 | .99  |
| 5000 | 1.07 | .60 | .4000 | 1800 | 2400 | 800 | .6098 | .3902 | 1906 | 2439 | 780 | 1926 | 2400 | 800 | -126 | 1.33 |
| 5000 | 1.08 | .60 | .4000 | 1800 | 2400 | 800 | .6112 | .3888 | 1922 | 2445 | 778 | 1944 | 2400 | 800 | -144 | 1.73 |
| 5000 | 1.09 | .60 | .4000 | 1800 | 2400 | 800 | .6126 | .3874 | 1937 | 2450 | 775 | 1962 | 2400 | 800 | -162 | 2.17 |
| 5000 | 1.10 | .60 | .4000 | 1800 | 2400 | 800 | .6139 | .3861 | 1952 | 2456 | 772 | 1980 | 2400 | 800 | -180 | 2.66 |
| 5000 | 1.11 | .60 | .4000 | 1800 | 2400 | 800 | .6152 | .3848 | 1968 | 2461 | 770 | 1998 | 2400 | 800 | -198 | 3.19 |
| 5000 | 1.12 | .60 | .4000 | 1800 | 2400 | 800 | .6166 | .3834 | 1983 | 2466 | 767 | 2016 | 2400 | 800 | -216 | 3.76 |
| 5000 | 1.13 | .60 | .4000 | 1800 | 2400 | 800 | .6179 | .3821 | 1998 | 2472 | 764 | 2034 | 2400 | 800 | -234 | 4.38 |
| 5000 | 1.14 | .60 | .4000 | 1800 | 2400 | 800 | .6192 | .3808 | 2014 | 2477 | 762 | 2052 | 2400 | 800 | -252 | 5.05 |
| 5000 | 1.15 | .60 | .4000 | 1800 | 2400 | 800 | .6205 | .3795 | 2029 | 2482 | 759 | 2070 | 2400 | 800 | -270 | 5.75 |

|      |      |     |       |      |      |     |       |       |      |      |     |      |      |     |      |       |
|------|------|-----|-------|------|------|-----|-------|-------|------|------|-----|------|------|-----|------|-------|
| 5000 | 1.16 | .60 | .4000 | 1800 | 2400 | 800 | .6218 | .3782 | 2044 | 2487 | 756 | 2088 | 2400 | 800 | -288 | 6.49  |
| 5000 | 1.17 | .60 | .4000 | 1800 | 2400 | 800 | .6231 | .3769 | 2060 | 2492 | 754 | 2106 | 2400 | 800 | -306 | 7.27  |
| 5000 | 1.18 | .60 | .4000 | 1800 | 2400 | 800 | .6243 | .3757 | 2075 | 2497 | 751 | 2124 | 2400 | 800 | -324 | 8.09  |
| 5000 | 1.19 | .60 | .4000 | 1800 | 2400 | 800 | .6256 | .3744 | 2091 | 2502 | 749 | 2142 | 2400 | 800 | -342 | 8.95  |
| 5000 | 1.20 | .60 | .4000 | 1800 | 2400 | 800 | .6269 | .3731 | 2106 | 2507 | 746 | 2160 | 2400 | 800 | -360 | 9.84  |
| 5000 | .80  | .65 | .3500 | 2113 | 2275 | 613 | .6177 | .3823 | 1747 | 2162 | 669 | 1690 | 2275 | 613 | 423  | 12.52 |
| 5000 | .81  | .65 | .3500 | 2113 | 2275 | 613 | .6195 | .3805 | 1765 | 2168 | 666 | 1711 | 2275 | 613 | 401  | 11.18 |
| 5000 | .82  | .65 | .3500 | 2113 | 2275 | 613 | .6212 | .3788 | 1783 | 2174 | 663 | 1732 | 2275 | 613 | 380  | 9.94  |
| 5000 | .83  | .65 | .3500 | 2113 | 2275 | 613 | .6229 | .3771 | 1801 | 2180 | 660 | 1753 | 2275 | 613 | 359  | 8.77  |
| 5000 | .84  | .65 | .3500 | 2113 | 2275 | 613 | .6246 | .3754 | 1819 | 2186 | 657 | 1775 | 2275 | 613 | 338  | 7.69  |
| 5000 | .85  | .65 | .3500 | 2113 | 2275 | 613 | .6263 | .3737 | 1837 | 2192 | 654 | 1796 | 2275 | 613 | 317  | 6.70  |
| 5000 | .86  | .65 | .3500 | 2113 | 2275 | 613 | .6280 | .3720 | 1855 | 2198 | 651 | 1817 | 2275 | 613 | 296  | 5.78  |
| 5000 | .87  | .65 | .3500 | 2113 | 2275 | 613 | .6297 | .3703 | 1873 | 2204 | 648 | 1838 | 2275 | 613 | 275  | 4.93  |
| 5000 | .88  | .65 | .3500 | 2113 | 2275 | 613 | .6313 | .3687 | 1892 | 2210 | 645 | 1859 | 2275 | 613 | 254  | 4.16  |
| 5000 | .89  | .65 | .3500 | 2113 | 2275 | 613 | .6329 | .3671 | 1910 | 2215 | 642 | 1880 | 2275 | 613 | 232  | 3.46  |
| 5000 | .90  | .65 | .3500 | 2113 | 2275 | 613 | .6346 | .3654 | 1928 | 2221 | 640 | 1901 | 2275 | 613 | 211  | 2.84  |
| 5000 | .91  | .65 | .3500 | 2113 | 2275 | 613 | .6362 | .3638 | 1947 | 2227 | 637 | 1922 | 2275 | 613 | 190  | 2.27  |
| 5000 | .92  | .65 | .3500 | 2113 | 2275 | 613 | .6378 | .3622 | 1965 | 2232 | 634 | 1944 | 2275 | 613 | 169  | 1.78  |
| 5000 | .93  | .65 | .3500 | 2113 | 2275 | 613 | .6393 | .3607 | 1983 | 2238 | 631 | 1965 | 2275 | 613 | 148  | 1.35  |
| 5000 | .94  | .65 | .3500 | 2113 | 2275 | 613 | .6409 | .3591 | 2002 | 2243 | 628 | 1986 | 2275 | 613 | 127  | .98   |
| 5000 | .95  | .65 | .3500 | 2113 | 2275 | 613 | .6424 | .3576 | 2020 | 2249 | 626 | 2007 | 2275 | 613 | 106  | .68   |
| 5000 | .96  | .65 | .3500 | 2113 | 2275 | 613 | .6440 | .3560 | 2039 | 2254 | 623 | 2028 | 2275 | 613 | 85   | .43   |
| 5000 | .97  | .65 | .3500 | 2113 | 2275 | 613 | .6455 | .3545 | 2057 | 2259 | 620 | 2049 | 2275 | 613 | 63   | .24   |
| 5000 | .98  | .65 | .3500 | 2113 | 2275 | 613 | .6470 | .3530 | 2075 | 2265 | 618 | 2070 | 2275 | 613 | 42   | .11   |
| 5000 | .99  | .65 | .3500 | 2113 | 2275 | 613 | .6485 | .3515 | 2094 | 2270 | 615 | 2091 | 2275 | 613 | 21   | .03   |
| 5000 | 1.00 | .65 | .3500 | 2113 | 2275 | 613 | .6500 | .3500 | 2113 | 2275 | 613 | 2113 | 2275 | 613 | 0    | .00   |
| 5000 | 1.01 | .65 | .3500 | 2113 | 2275 | 613 | .6515 | .3485 | 2131 | 2280 | 610 | 2134 | 2275 | 613 | -21  | .03   |
| 5000 | 1.02 | .65 | .3500 | 2113 | 2275 | 613 | .6529 | .3471 | 2150 | 2285 | 607 | 2155 | 2275 | 613 | -42  | .10   |
| 5000 | 1.03 | .65 | .3500 | 2113 | 2275 | 613 | .6544 | .3456 | 2168 | 2290 | 605 | 2176 | 2275 | 613 | -63  | .23   |
| 5000 | 1.04 | .65 | .3500 | 2113 | 2275 | 613 | .6558 | .3442 | 2187 | 2295 | 602 | 2197 | 2275 | 613 | -85  | .40   |
| 5000 | 1.05 | .65 | .3500 | 2113 | 2275 | 613 | .6572 | .3428 | 2205 | 2300 | 600 | 2218 | 2275 | 613 | -106 | .62   |
| 5000 | 1.06 | .65 | .3500 | 2113 | 2275 | 613 | .6587 | .3413 | 2224 | 2305 | 597 | 2239 | 2275 | 613 | -127 | .88   |
| 5000 | 1.07 | .65 | .3500 | 2113 | 2275 | 613 | .6601 | .3399 | 2243 | 2310 | 595 | 2260 | 2275 | 613 | -148 | 1.19  |



|      |      |     |       |      |      |     |       |       |      |      |     |      |      |     |      |       |
|------|------|-----|-------|------|------|-----|-------|-------|------|------|-----|------|------|-----|------|-------|
| 5000 | 1.08 | .65 | .3500 | 2113 | 2275 | 613 | .6614 | .3386 | 2261 | 2315 | 592 | 2282 | 2275 | 613 | -169 | 1.55  |
| 5000 | 1.09 | .65 | .3500 | 2113 | 2275 | 613 | .6628 | .3372 | 2280 | 2320 | 590 | 2303 | 2275 | 613 | -190 | 1.94  |
| 5000 | 1.10 | .65 | .3500 | 2113 | 2275 | 613 | .6642 | .3358 | 2299 | 2325 | 588 | 2324 | 2275 | 613 | -211 | 2.38  |
| 5000 | 1.11 | .65 | .3500 | 2113 | 2275 | 613 | .6655 | .3345 | 2318 | 2329 | 585 | 2345 | 2275 | 613 | -232 | 2.85  |
| 5000 | 1.12 | .65 | .3500 | 2113 | 2275 | 613 | .6669 | .3331 | 2336 | 2334 | 583 | 2366 | 2275 | 613 | -254 | 3.37  |
| 5000 | 1.13 | .65 | .3500 | 2113 | 2275 | 613 | .6682 | .3318 | 2355 | 2339 | 581 | 2387 | 2275 | 613 | -275 | 3.92  |
| 5000 | 1.14 | .65 | .3500 | 2113 | 2275 | 613 | .6695 | .3305 | 2374 | 2343 | 578 | 2408 | 2275 | 613 | -296 | 4.51  |
| 5000 | 1.15 | .65 | .3500 | 2113 | 2275 | 613 | .6709 | .3291 | 2393 | 2348 | 576 | 2429 | 2275 | 613 | -317 | 5.14  |
| 5000 | 1.16 | .65 | .3500 | 2113 | 2275 | 613 | .6722 | .3278 | 2412 | 2353 | 574 | 2451 | 2275 | 613 | -338 | 5.80  |
| 5000 | 1.17 | .65 | .3500 | 2113 | 2275 | 613 | .6735 | .3265 | 2431 | 2357 | 571 | 2472 | 2275 | 613 | -359 | 6.50  |
| 5000 | 1.18 | .65 | .3500 | 2113 | 2275 | 613 | .6747 | .3253 | 2449 | 2362 | 569 | 2493 | 2275 | 613 | -380 | 7.23  |
| 5000 | 1.19 | .65 | .3500 | 2113 | 2275 | 613 | .6760 | .3240 | 2468 | 2366 | 567 | 2514 | 2275 | 613 | -401 | 8.00  |
| 5000 | 1.20 | .65 | .3500 | 2113 | 2275 | 613 | .6773 | .3227 | 2487 | 2370 | 565 | 2535 | 2275 | 613 | -423 | 8.79  |
| 5000 | .80  | .70 | .3000 | 2450 | 2100 | 450 | .6674 | .3326 | 2009 | 2002 | 499 | 1960 | 2100 | 450 | 490  | 10.76 |
| 5000 | .81  | .70 | .3000 | 2450 | 2100 | 450 | .6692 | .3308 | 2031 | 2008 | 496 | 1985 | 2100 | 450 | 466  | 9.60  |
| 5000 | .82  | .70 | .3000 | 2450 | 2100 | 450 | .6710 | .3290 | 2053 | 2013 | 494 | 2009 | 2100 | 450 | 441  | 8.53  |
| 5000 | .83  | .70 | .3000 | 2450 | 2100 | 450 | .6727 | .3273 | 2074 | 2018 | 491 | 2034 | 2100 | 450 | 417  | 7.53  |
| 5000 | .84  | .70 | .3000 | 2450 | 2100 | 450 | .6745 | .3255 | 2096 | 2023 | 488 | 2058 | 2100 | 450 | 392  | 6.60  |
| 5000 | .85  | .70 | .3000 | 2450 | 2100 | 450 | .6762 | .3238 | 2118 | 2029 | 486 | 2083 | 2100 | 450 | 368  | 5.74  |
| 5000 | .86  | .70 | .3000 | 2450 | 2100 | 450 | .6779 | .3221 | 2140 | 2034 | 483 | 2107 | 2100 | 450 | 343  | 4.95  |
| 5000 | .87  | .70 | .3000 | 2450 | 2100 | 450 | .6796 | .3204 | 2162 | 2039 | 481 | 2132 | 2100 | 450 | 319  | 4.22  |
| 5000 | .88  | .70 | .3000 | 2450 | 2100 | 450 | .6813 | .3187 | 2184 | 2044 | 478 | 2156 | 2100 | 450 | 294  | 3.56  |
| 5000 | .89  | .70 | .3000 | 2450 | 2100 | 450 | .6829 | .3171 | 2206 | 2049 | 476 | 2181 | 2100 | 450 | 270  | 2.96  |
| 5000 | .90  | .70 | .3000 | 2450 | 2100 | 450 | .6845 | .3155 | 2228 | 2054 | 473 | 2205 | 2100 | 450 | 245  | 2.42  |
| 5000 | .91  | .70 | .3000 | 2450 | 2100 | 450 | .6862 | .3138 | 2250 | 2058 | 471 | 2230 | 2100 | 450 | 221  | 1.94  |
| 5000 | .92  | .70 | .3000 | 2450 | 2100 | 450 | .6878 | .3122 | 2272 | 2063 | 468 | 2254 | 2100 | 450 | 196  | 1.52  |
| 5000 | .93  | .70 | .3000 | 2450 | 2100 | 450 | .6893 | .3107 | 2294 | 2068 | 466 | 2279 | 2100 | 450 | 172  | 1.15  |
| 5000 | .94  | .70 | .3000 | 2450 | 2100 | 450 | .6909 | .3091 | 2317 | 2073 | 464 | 2303 | 2100 | 450 | 147  | .84   |
| 5000 | .95  | .70 | .3000 | 2450 | 2100 | 450 | .6925 | .3075 | 2339 | 2077 | 461 | 2328 | 2100 | 450 | 123  | .58   |
| 5000 | .96  | .70 | .3000 | 2450 | 2100 | 450 | .6940 | .3060 | 2361 | 2082 | 459 | 2352 | 2100 | 450 | 98   | .37   |
| 5000 | .97  | .70 | .3000 | 2450 | 2100 | 450 | .6955 | .3045 | 2383 | 2087 | 457 | 2377 | 2100 | 450 | 74   | .20   |
| 5000 | .98  | .70 | .3000 | 2450 | 2100 | 450 | .6970 | .3030 | 2405 | 2091 | 454 | 2401 | 2100 | 450 | 49   | .09   |
| 5000 | .99  | .70 | .3000 | 2450 | 2100 | 450 | .6985 | .3015 | 2428 | 2096 | 452 | 2426 | 2100 | 450 | 25   | .02   |

|      |      |     |       |      |      |     |       |       |      |      |     |      |      |     |      |      |
|------|------|-----|-------|------|------|-----|-------|-------|------|------|-----|------|------|-----|------|------|
| 5000 | 1.00 | .70 | .3000 | 2450 | 2100 | 450 | .7000 | .3000 | 2450 | 2100 | 450 | 2450 | 2100 | 450 | 0    | .00  |
| 5000 | 1.01 | .70 | .3000 | 2450 | 2100 | 450 | .7015 | .2985 | 2472 | 2104 | 448 | 2475 | 2100 | 450 | -25  | .02  |
| 5000 | 1.02 | .70 | .3000 | 2450 | 2100 | 450 | .7029 | .2971 | 2495 | 2109 | 446 | 2499 | 2100 | 450 | -49  | .09  |
| 5000 | 1.03 | .70 | .3000 | 2450 | 2100 | 450 | .7043 | .2957 | 2517 | 2113 | 443 | 2524 | 2100 | 450 | -74  | .19  |
| 5000 | 1.04 | .70 | .3000 | 2450 | 2100 | 450 | .7058 | .2942 | 2539 | 2117 | 441 | 2548 | 2100 | 450 | -98  | .34  |
| 5000 | 1.05 | .70 | .3000 | 2450 | 2100 | 450 | .7072 | .2928 | 2562 | 2122 | 439 | 2573 | 2100 | 450 | -123 | .53  |
| 5000 | 1.06 | .70 | .3000 | 2450 | 2100 | 450 | .7086 | .2914 | 2584 | 2126 | 437 | 2597 | 2100 | 450 | -147 | .75  |
| 5000 | 1.07 | .70 | .3000 | 2450 | 2100 | 450 | .7099 | .2901 | 2607 | 2130 | 435 | 2622 | 2100 | 450 | -172 | 1.02 |
| 5000 | 1.08 | .70 | .3000 | 2450 | 2100 | 450 | .7113 | .2887 | 2629 | 2134 | 433 | 2646 | 2100 | 450 | -196 | 1.32 |
| 5000 | 1.09 | .70 | .3000 | 2450 | 2100 | 450 | .7127 | .2873 | 2651 | 2138 | 431 | 2671 | 2100 | 450 | -221 | 1.65 |
| 5000 | 1.10 | .70 | .3000 | 2450 | 2100 | 450 | .7140 | .2860 | 2674 | 2142 | 429 | 2695 | 2100 | 450 | -245 | 2.02 |
| 5000 | 1.11 | .70 | .3000 | 2450 | 2100 | 450 | .7153 | .2847 | 2696 | 2146 | 427 | 2720 | 2100 | 450 | -270 | 2.42 |
| 5000 | 1.12 | .70 | .3000 | 2450 | 2100 | 450 | .7167 | .2833 | 2719 | 2150 | 425 | 2744 | 2100 | 450 | -294 | 2.86 |
| 5000 | 1.13 | .70 | .3000 | 2450 | 2100 | 450 | .7180 | .2820 | 2742 | 2154 | 423 | 2769 | 2100 | 450 | -319 | 3.33 |
| 5000 | 1.14 | .70 | .3000 | 2450 | 2100 | 450 | .7193 | .2807 | 2764 | 2158 | 421 | 2793 | 2100 | 450 | -343 | 3.83 |
| 5000 | 1.15 | .70 | .3000 | 2450 | 2100 | 450 | .7205 | .2795 | 2787 | 2162 | 419 | 2818 | 2100 | 450 | -368 | 4.36 |
| 5000 | 1.16 | .70 | .3000 | 2450 | 2100 | 450 | .7218 | .2782 | 2809 | 2165 | 417 | 2842 | 2100 | 450 | -392 | 4.92 |
| 5000 | 1.17 | .70 | .3000 | 2450 | 2100 | 450 | .7231 | .2769 | 2832 | 2169 | 415 | 2867 | 2100 | 450 | -417 | 5.51 |
| 5000 | 1.18 | .70 | .3000 | 2450 | 2100 | 450 | .7243 | .2757 | 2855 | 2173 | 414 | 2891 | 2100 | 450 | -441 | 6.13 |
| 5000 | 1.19 | .70 | .3000 | 2450 | 2100 | 450 | .7256 | .2744 | 2877 | 2177 | 412 | 2916 | 2100 | 450 | -466 | 6.78 |
| 5000 | 1.20 | .70 | .3000 | 2450 | 2100 | 450 | .7268 | .2732 | 2900 | 2180 | 410 | 2940 | 2100 | 450 | -490 | 7.45 |
| 5000 | .80  | .75 | .2500 | 2813 | 1875 | 313 | .7183 | .2817 | 2290 | 1796 | 352 | 2250 | 1875 | 313 | 563  | 8.64 |
| 5000 | .81  | .75 | .2500 | 2813 | 1875 | 313 | .7201 | .2799 | 2316 | 1800 | 350 | 2278 | 1875 | 313 | 534  | 7.71 |
| 5000 | .82  | .75 | .2500 | 2813 | 1875 | 313 | .7218 | .2782 | 2341 | 1805 | 348 | 2306 | 1875 | 313 | 506  | 6.84 |
| 5000 | .83  | .75 | .2500 | 2813 | 1875 | 313 | .7236 | .2764 | 2367 | 1809 | 346 | 2334 | 1875 | 313 | 478  | 6.04 |
| 5000 | .84  | .75 | .2500 | 2813 | 1875 | 313 | .7253 | .2747 | 2393 | 1813 | 343 | 2363 | 1875 | 313 | 450  | 5.29 |
| 5000 | .85  | .75 | .2500 | 2813 | 1875 | 313 | .7270 | .2730 | 2419 | 1817 | 341 | 2391 | 1875 | 313 | 422  | 4.60 |
| 5000 | .86  | .75 | .2500 | 2813 | 1875 | 313 | .7286 | .2714 | 2445 | 1822 | 339 | 2419 | 1875 | 313 | 394  | 3.96 |
| 5000 | .87  | .75 | .2500 | 2813 | 1875 | 313 | .7303 | .2697 | 2472 | 1826 | 337 | 2447 | 1875 | 313 | 366  | 3.38 |
| 5000 | .88  | .75 | .2500 | 2813 | 1875 | 313 | .7319 | .2681 | 2498 | 1830 | 335 | 2475 | 1875 | 313 | 338  | 2.85 |
| 5000 | .89  | .75 | .2500 | 2813 | 1875 | 313 | .7335 | .2665 | 2524 | 1834 | 333 | 2503 | 1875 | 313 | 309  | 2.37 |
| 5000 | .90  | .75 | .2500 | 2813 | 1875 | 313 | .7351 | .2649 | 2550 | 1838 | 331 | 2531 | 1875 | 313 | 281  | 1.94 |
| 5000 | .91  | .75 | .2500 | 2813 | 1875 | 313 | .7367 | .2633 | 2576 | 1842 | 329 | 2559 | 1875 | 313 | 253  | 1.55 |

|      |      |     |       |      |      |     |       |       |      |      |     |      |      |     |      |      |
|------|------|-----|-------|------|------|-----|-------|-------|------|------|-----|------|------|-----|------|------|
| 5000 | .92  | .75 | .2500 | 2813 | 1875 | 313 | .7382 | .2618 | 2602 | 1846 | 327 | 2588 | 1875 | 313 | 225  | 1.22 |
| 5000 | .93  | .75 | .2500 | 2813 | 1875 | 313 | .7398 | .2602 | 2628 | 1849 | 325 | 2616 | 1875 | 313 | 197  | .92  |
| 5000 | .94  | .75 | .2500 | 2813 | 1875 | 313 | .7413 | .2587 | 2655 | 1853 | 323 | 2644 | 1875 | 313 | 169  | .67  |
| 5000 | .95  | .75 | .2500 | 2813 | 1875 | 313 | .7428 | .2572 | 2681 | 1857 | 322 | 2672 | 1875 | 313 | 141  | .46  |
| 5000 | .96  | .75 | .2500 | 2813 | 1875 | 313 | .7442 | .2558 | 2707 | 1861 | 320 | 2700 | 1875 | 313 | 113  | .29  |
| 5000 | .97  | .75 | .2500 | 2813 | 1875 | 313 | .7457 | .2543 | 2733 | 1864 | 318 | 2728 | 1875 | 313 | 84   | .16  |
| 5000 | .98  | .75 | .2500 | 2813 | 1875 | 313 | .7472 | .2528 | 2760 | 1868 | 316 | 2756 | 1875 | 313 | 56   | .07  |
| 5000 | .99  | .75 | .2500 | 2813 | 1875 | 313 | .7486 | .2514 | 2786 | 1871 | 314 | 2784 | 1875 | 313 | 28   | .02  |
| 5000 | 1.00 | .75 | .2500 | 2813 | 1875 | 313 | .7500 | .2500 | 2813 | 1875 | 313 | 2813 | 1875 | 313 | 0    | .00  |
| 5000 | 1.01 | .75 | .2500 | 2813 | 1875 | 313 | .7514 | .2486 | 2839 | 1878 | 311 | 2841 | 1875 | 313 | -28  | .02  |
| 5000 | 1.02 | .75 | .2500 | 2813 | 1875 | 313 | .7528 | .2472 | 2865 | 1882 | 309 | 2869 | 1875 | 313 | -56  | .07  |
| 5000 | 1.03 | .75 | .2500 | 2813 | 1875 | 313 | .7541 | .2459 | 2892 | 1885 | 307 | 2897 | 1875 | 313 | -84  | .15  |
| 5000 | 1.04 | .75 | .2500 | 2813 | 1875 | 313 | .7555 | .2445 | 2918 | 1889 | 306 | 2925 | 1875 | 313 | -113 | .27  |
| 5000 | 1.05 | .75 | .2500 | 2813 | 1875 | 313 | .7568 | .2432 | 2945 | 1892 | 304 | 2953 | 1875 | 313 | -141 | .42  |
| 5000 | 1.06 | .75 | .2500 | 2813 | 1875 | 313 | .7582 | .2418 | 2971 | 1895 | 302 | 2981 | 1875 | 313 | -169 | .60  |
| 5000 | 1.07 | .75 | .2500 | 2813 | 1875 | 313 | .7595 | .2405 | 2998 | 1899 | 301 | 3009 | 1875 | 313 | -197 | .81  |
| 5000 | 1.08 | .75 | .2500 | 2813 | 1875 | 313 | .7608 | .2392 | 3024 | 1902 | 299 | 3038 | 1875 | 313 | -225 | 1.05 |
| 5000 | 1.09 | .75 | .2500 | 2813 | 1875 | 313 | .7620 | .2380 | 3051 | 1905 | 297 | 3066 | 1875 | 313 | -253 | 1.31 |
| 5000 | 1.10 | .75 | .2500 | 2813 | 1875 | 313 | .7633 | .2367 | 3077 | 1908 | 296 | 3094 | 1875 | 313 | -281 | 1.61 |
| 5000 | 1.11 | .75 | .2500 | 2813 | 1875 | 313 | .7646 | .2354 | 3104 | 1911 | 294 | 3122 | 1875 | 313 | -309 | 1.93 |
| 5000 | 1.12 | .75 | .2500 | 2813 | 1875 | 313 | .7658 | .2342 | 3130 | 1915 | 293 | 3150 | 1875 | 313 | -338 | 2.27 |
| 5000 | 1.13 | .75 | .2500 | 2813 | 1875 | 313 | .7670 | .2330 | 3157 | 1918 | 291 | 3178 | 1875 | 313 | -366 | 2.65 |
| 5000 | 1.14 | .75 | .2500 | 2813 | 1875 | 313 | .7683 | .2317 | 3183 | 1921 | 290 | 3206 | 1875 | 313 | -394 | 3.04 |
| 5000 | 1.15 | .75 | .2500 | 2813 | 1875 | 313 | .7695 | .2305 | 3210 | 1924 | 288 | 3234 | 1875 | 313 | -422 | 3.47 |
| 5000 | 1.16 | .75 | .2500 | 2813 | 1875 | 313 | .7706 | .2294 | 3237 | 1927 | 287 | 3263 | 1875 | 313 | -450 | 3.91 |
| 5000 | 1.17 | .75 | .2500 | 2813 | 1875 | 313 | .7718 | .2282 | 3263 | 1930 | 285 | 3291 | 1875 | 313 | -478 | 4.38 |
| 5000 | 1.18 | .75 | .2500 | 2813 | 1875 | 313 | .7730 | .2270 | 3290 | 1932 | 284 | 3319 | 1875 | 313 | -506 | 4.87 |
| 5000 | 1.19 | .75 | .2500 | 2813 | 1875 | 313 | .7741 | .2259 | 3317 | 1935 | 282 | 3347 | 1875 | 313 | -534 | 5.38 |
| 5000 | 1.20 | .75 | .2500 | 2813 | 1875 | 313 | .7753 | .2247 | 3343 | 1938 | 281 | 3375 | 1875 | 313 | -563 | 5.91 |
| 5000 | .80  | .80 | .2000 | 3200 | 1600 | 200 | .7706 | .2294 | 2589 | 1541 | 229 | 2560 | 1600 | 200 | 640  | 6.33 |
| 5000 | .81  | .80 | .2000 | 3200 | 1600 | 200 | .7723 | .2277 | 2620 | 1545 | 228 | 2592 | 1600 | 200 | 608  | 5.64 |
| 5000 | .82  | .80 | .2000 | 3200 | 1600 | 200 | .7740 | .2260 | 2650 | 1548 | 226 | 2624 | 1600 | 200 | 576  | 5.01 |
| 5000 | .83  | .80 | .2000 | 3200 | 1600 | 200 | .7756 | .2244 | 2680 | 1551 | 224 | 2656 | 1600 | 200 | 544  | 4.42 |

|      |      |     |       |      |      |     |       |       |      |      |     |      |      |     |      |      |
|------|------|-----|-------|------|------|-----|-------|-------|------|------|-----|------|------|-----|------|------|
| 5000 | .84  | .80 | .2000 | 3200 | 1600 | 200 | .7772 | .2228 | 2711 | 1554 | 223 | 2688 | 1600 | 200 | 512  | 3.87 |
| 5000 | .85  | .80 | .2000 | 3200 | 1600 | 200 | .7788 | .2212 | 2741 | 1558 | 221 | 2720 | 1600 | 200 | 480  | 3.36 |
| 5000 | .86  | .80 | .2000 | 3200 | 1600 | 200 | .7803 | .2197 | 2772 | 1561 | 220 | 2752 | 1600 | 200 | 448  | 2.90 |
| 5000 | .87  | .80 | .2000 | 3200 | 1600 | 200 | .7818 | .2182 | 2802 | 1564 | 218 | 2784 | 1600 | 200 | 416  | 2.47 |
| 5000 | .88  | .80 | .2000 | 3200 | 1600 | 200 | .7834 | .2166 | 2833 | 1567 | 217 | 2816 | 1600 | 200 | 384  | 2.08 |
| 5000 | .89  | .80 | .2000 | 3200 | 1600 | 200 | .7849 | .2151 | 2863 | 1570 | 215 | 2848 | 1600 | 200 | 352  | 1.73 |
| 5000 | .90  | .80 | .2000 | 3200 | 1600 | 200 | .7863 | .2137 | 2894 | 1573 | 214 | 2880 | 1600 | 200 | 320  | 1.42 |
| 5000 | .91  | .80 | .2000 | 3200 | 1600 | 200 | .7878 | .2122 | 2924 | 1576 | 212 | 2912 | 1600 | 200 | 288  | 1.13 |
| 5000 | .92  | .80 | .2000 | 3200 | 1600 | 200 | .7892 | .2108 | 2955 | 1578 | 211 | 2944 | 1600 | 200 | 256  | .89  |
| 5000 | .93  | .80 | .2000 | 3200 | 1600 | 200 | .7906 | .2094 | 2985 | 1581 | 209 | 2976 | 1600 | 200 | 224  | .67  |
| 5000 | .94  | .80 | .2000 | 3200 | 1600 | 200 | .7920 | .2080 | 3016 | 1584 | 208 | 3008 | 1600 | 200 | 192  | .49  |
| 5000 | .95  | .80 | .2000 | 3200 | 1600 | 200 | .7934 | .2066 | 3047 | 1587 | 207 | 3040 | 1600 | 200 | 160  | .34  |
| 5000 | .96  | .80 | .2000 | 3200 | 1600 | 200 | .7947 | .2053 | 3077 | 1589 | 205 | 3072 | 1600 | 200 | 128  | .21  |
| 5000 | .97  | .80 | .2000 | 3200 | 1600 | 200 | .7961 | .2039 | 3108 | 1592 | 204 | 3104 | 1600 | 200 | 96   | .12  |
| 5000 | .98  | .80 | .2000 | 3200 | 1600 | 200 | .7974 | .2026 | 3139 | 1595 | 203 | 3136 | 1600 | 200 | 64   | .05  |
| 5000 | .99  | .80 | .2000 | 3200 | 1600 | 200 | .7987 | .2013 | 3169 | 1597 | 201 | 3168 | 1600 | 200 | 32   | .01  |
| 5000 | 1.00 | .80 | .2000 | 3200 | 1600 | 200 | .8000 | .2000 | 3200 | 1600 | 200 | 3200 | 1600 | 200 | 0    | .00  |
| 5000 | 1.01 | .80 | .2000 | 3200 | 1600 | 200 | .8013 | .1987 | 3231 | 1603 | 199 | 3232 | 1600 | 200 | -32  | .01  |
| 5000 | 1.02 | .80 | .2000 | 3200 | 1600 | 200 | .8025 | .1975 | 3261 | 1605 | 197 | 3264 | 1600 | 200 | -64  | .05  |
| 5000 | 1.03 | .80 | .2000 | 3200 | 1600 | 200 | .8038 | .1962 | 3292 | 1608 | 196 | 3296 | 1600 | 200 | -96  | .11  |
| 5000 | 1.04 | .80 | .2000 | 3200 | 1600 | 200 | .8050 | .1950 | 3323 | 1610 | 195 | 3328 | 1600 | 200 | -128 | .20  |
| 5000 | 1.05 | .80 | .2000 | 3200 | 1600 | 200 | .8062 | .1938 | 3354 | 1612 | 194 | 3360 | 1600 | 200 | -160 | .31  |
| 5000 | 1.06 | .80 | .2000 | 3200 | 1600 | 200 | .8074 | .1926 | 3385 | 1615 | 193 | 3392 | 1600 | 200 | -192 | .44  |
| 5000 | 1.07 | .80 | .2000 | 3200 | 1600 | 200 | .8086 | .1914 | 3415 | 1617 | 191 | 3424 | 1600 | 200 | -224 | .59  |
| 5000 | 1.08 | .80 | .2000 | 3200 | 1600 | 200 | .8097 | .1903 | 3446 | 1619 | 190 | 3456 | 1600 | 200 | -256 | .76  |
| 5000 | 1.09 | .80 | .2000 | 3200 | 1600 | 200 | .8109 | .1891 | 3477 | 1622 | 189 | 3488 | 1600 | 200 | -288 | .95  |
| 5000 | 1.10 | .80 | .2000 | 3200 | 1600 | 200 | .8120 | .1880 | 3508 | 1624 | 188 | 3520 | 1600 | 200 | -320 | 1.17 |
| 5000 | 1.11 | .80 | .2000 | 3200 | 1600 | 200 | .8132 | .1868 | 3539 | 1626 | 187 | 3552 | 1600 | 200 | -352 | 1.40 |
| 5000 | 1.12 | .80 | .2000 | 3200 | 1600 | 200 | .8143 | .1857 | 3570 | 1629 | 186 | 3584 | 1600 | 200 | -384 | 1.65 |
| 5000 | 1.13 | .80 | .2000 | 3200 | 1600 | 200 | .8154 | .1846 | 3601 | 1631 | 185 | 3616 | 1600 | 200 | -416 | 1.92 |
| 5000 | 1.14 | .80 | .2000 | 3200 | 1600 | 200 | .8164 | .1836 | 3632 | 1633 | 184 | 3648 | 1600 | 200 | -448 | 2.21 |
| 5000 | 1.15 | .80 | .2000 | 3200 | 1600 | 200 | .8175 | .1825 | 3662 | 1635 | 182 | 3680 | 1600 | 200 | -480 | 2.52 |
| 5000 | 1.16 | .80 | .2000 | 3200 | 1600 | 200 | .8186 | .1814 | 3693 | 1637 | 181 | 3712 | 1600 | 200 | -512 | 2.84 |

|      |      |     |       |      |      |     |       |       |      |      |     |      |      |     |      |      |
|------|------|-----|-------|------|------|-----|-------|-------|------|------|-----|------|------|-----|------|------|
| 5000 | 1.17 | .80 | .2000 | 3200 | 1600 | 200 | .8196 | .1804 | 3724 | 1639 | 180 | 3744 | 1600 | 200 | -544 | 3.18 |
| 5000 | 1.18 | .80 | .2000 | 3200 | 1600 | 200 | .8207 | .1793 | 3755 | 1641 | 179 | 3776 | 1600 | 200 | -576 | 3.53 |
| 5000 | 1.19 | .80 | .2000 | 3200 | 1600 | 200 | .8217 | .1783 | 3786 | 1643 | 178 | 3808 | 1600 | 200 | -608 | 3.91 |
| 5000 | 1.20 | .80 | .2000 | 3200 | 1600 | 200 | .8227 | .1773 | 3817 | 1645 | 177 | 3840 | 1600 | 200 | -640 | 4.29 |
| 5000 | .80  | .85 | .1500 | 3613 | 1275 | 113 | .8247 | .1753 | 2909 | 1237 | 132 | 2890 | 1275 | 113 | 723  | 4.04 |
| 5000 | .81  | .85 | .1500 | 3613 | 1275 | 113 | .8261 | .1739 | 2944 | 1239 | 130 | 2926 | 1275 | 113 | 686  | 3.60 |
| 5000 | .82  | .85 | .1500 | 3613 | 1275 | 113 | .8276 | .1724 | 2979 | 1241 | 129 | 2962 | 1275 | 113 | 650  | 3.19 |
| 5000 | .83  | .85 | .1500 | 3613 | 1275 | 113 | .8290 | .1710 | 3014 | 1243 | 128 | 2998 | 1275 | 113 | 614  | 2.82 |
| 5000 | .84  | .85 | .1500 | 3613 | 1275 | 113 | .8304 | .1696 | 3049 | 1246 | 127 | 3035 | 1275 | 113 | 578  | 2.47 |
| 5000 | .85  | .85 | .1500 | 3613 | 1275 | 113 | .8318 | .1682 | 3084 | 1248 | 126 | 3071 | 1275 | 113 | 542  | 2.14 |
| 5000 | .86  | .85 | .1500 | 3613 | 1275 | 113 | .8331 | .1669 | 3119 | 1250 | 125 | 3107 | 1275 | 113 | 506  | 1.84 |
| 5000 | .87  | .85 | .1500 | 3613 | 1275 | 113 | .8345 | .1655 | 3155 | 1252 | 124 | 3143 | 1275 | 113 | 470  | 1.57 |
| 5000 | .88  | .85 | .1500 | 3613 | 1275 | 113 | .8358 | .1642 | 3190 | 1254 | 123 | 3179 | 1275 | 113 | 434  | 1.33 |
| 5000 | .89  | .85 | .1500 | 3613 | 1275 | 113 | .8370 | .1630 | 3225 | 1256 | 122 | 3215 | 1275 | 113 | 397  | 1.10 |
| 5000 | .90  | .85 | .1500 | 3613 | 1275 | 113 | .8383 | .1617 | 3260 | 1257 | 121 | 3251 | 1275 | 113 | 361  | .90  |
| 5000 | .91  | .85 | .1500 | 3613 | 1275 | 113 | .8396 | .1604 | 3295 | 1259 | 120 | 3287 | 1275 | 113 | 325  | .72  |
| 5000 | .92  | .85 | .1500 | 3613 | 1275 | 113 | .8408 | .1592 | 3330 | 1261 | 119 | 3324 | 1275 | 113 | 289  | .56  |
| 5000 | .93  | .85 | .1500 | 3613 | 1275 | 113 | .8420 | .1580 | 3366 | 1263 | 118 | 3360 | 1275 | 113 | 253  | .43  |
| 5000 | .94  | .85 | .1500 | 3613 | 1275 | 113 | .8432 | .1568 | 3401 | 1265 | 118 | 3396 | 1275 | 113 | 217  | .31  |
| 5000 | .95  | .85 | .1500 | 3613 | 1275 | 113 | .8444 | .1556 | 3436 | 1267 | 117 | 3432 | 1275 | 113 | 181  | .21  |
| 5000 | .96  | .85 | .1500 | 3613 | 1275 | 113 | .8455 | .1545 | 3471 | 1268 | 116 | 3468 | 1275 | 113 | 145  | .14  |
| 5000 | .97  | .85 | .1500 | 3613 | 1275 | 113 | .8467 | .1533 | 3507 | 1270 | 115 | 3504 | 1275 | 113 | 108  | .08  |
| 5000 | .98  | .85 | .1500 | 3613 | 1275 | 113 | .8478 | .1522 | 3542 | 1272 | 114 | 3540 | 1275 | 113 | 72   | .03  |
| 5000 | .99  | .85 | .1500 | 3613 | 1275 | 113 | .8489 | .1511 | 3577 | 1273 | 113 | 3576 | 1275 | 113 | 36   | .01  |
| 5000 | 1.00 | .85 | .1500 | 3613 | 1275 | 113 | .8500 | .1500 | 3613 | 1275 | 113 | 3613 | 1275 | 113 | 0    | .00  |
| 5000 | 1.01 | .85 | .1500 | 3613 | 1275 | 113 | .8511 | .1489 | 3648 | 1277 | 112 | 3649 | 1275 | 113 | -36  | .01  |
| 5000 | 1.02 | .85 | .1500 | 3613 | 1275 | 113 | .8521 | .1479 | 3683 | 1278 | 111 | 3685 | 1275 | 113 | -72  | .03  |
| 5000 | 1.03 | .85 | .1500 | 3613 | 1275 | 113 | .8532 | .1468 | 3718 | 1280 | 110 | 3721 | 1275 | 113 | -108 | .07  |
| 5000 | 1.04 | .85 | .1500 | 3613 | 1275 | 113 | .8542 | .1458 | 3754 | 1281 | 109 | 3757 | 1275 | 113 | -145 | .13  |
| 5000 | 1.05 | .85 | .1500 | 3613 | 1275 | 113 | .8552 | .1448 | 3789 | 1283 | 109 | 3793 | 1275 | 113 | -181 | .19  |
| 5000 | 1.06 | .85 | .1500 | 3613 | 1275 | 113 | .8562 | .1438 | 3825 | 1284 | 108 | 3829 | 1275 | 113 | -217 | .28  |
| 5000 | 1.07 | .85 | .1500 | 3613 | 1275 | 113 | .8572 | .1428 | 3860 | 1286 | 107 | 3865 | 1275 | 113 | -253 | .37  |
| 5000 | 1.08 | .85 | .1500 | 3613 | 1275 | 113 | .8582 | .1418 | 3895 | 1287 | 106 | 3902 | 1275 | 113 | -289 | .48  |

|      |      |     |       |      |      |     |       |       |      |      |     |      |      |     |      |      |
|------|------|-----|-------|------|------|-----|-------|-------|------|------|-----|------|------|-----|------|------|
| 5000 | 1.09 | .85 | .1500 | 3613 | 1275 | 113 | .8592 | .1408 | 3931 | 1289 | 106 | 3938 | 1275 | 113 | -325 | .61  |
| 5000 | 1.10 | .85 | .1500 | 3613 | 1275 | 113 | .8601 | .1399 | 3966 | 1290 | 105 | 3974 | 1275 | 113 | -361 | .74  |
| 5000 | 1.11 | .85 | .1500 | 3613 | 1275 | 113 | .8610 | .1390 | 4002 | 1292 | 104 | 4010 | 1275 | 113 | -397 | .89  |
| 5000 | 1.12 | .85 | .1500 | 3613 | 1275 | 113 | .8620 | .1380 | 4037 | 1293 | 104 | 4046 | 1275 | 113 | -434 | 1.05 |
| 5000 | 1.13 | .85 | .1500 | 3613 | 1275 | 113 | .8629 | .1371 | 4072 | 1294 | 103 | 4082 | 1275 | 113 | -470 | 1.22 |
| 5000 | 1.14 | .85 | .1500 | 3613 | 1275 | 113 | .8638 | .1362 | 4108 | 1296 | 102 | 4118 | 1275 | 113 | -506 | 1.40 |
| 5000 | 1.15 | .85 | .1500 | 3613 | 1275 | 113 | .8647 | .1353 | 4143 | 1297 | 101 | 4154 | 1275 | 113 | -542 | 1.59 |
| 5000 | 1.16 | .85 | .1500 | 3613 | 1275 | 113 | .8655 | .1345 | 4179 | 1298 | 101 | 4191 | 1275 | 113 | -578 | 1.80 |
| 5000 | 1.17 | .85 | .1500 | 3613 | 1275 | 113 | .8664 | .1336 | 4214 | 1300 | 100 | 4227 | 1275 | 113 | -614 | 2.01 |
| 5000 | 1.18 | .85 | .1500 | 3613 | 1275 | 113 | .8673 | .1327 | 4250 | 1301 | 100 | 4263 | 1275 | 113 | -650 | 2.24 |
| 5000 | 1.19 | .85 | .1500 | 3613 | 1275 | 113 | .8681 | .1319 | 4285 | 1302 | 99  | 4299 | 1275 | 113 | -686 | 2.47 |
| 5000 | 1.20 | .85 | .1500 | 3613 | 1275 | 113 | .8689 | .1311 | 4321 | 1303 | 98  | 4335 | 1275 | 113 | -723 | 2.72 |
| 5000 | .80  | .90 | .1000 | 4050 | 900  | 50  | .8807 | .1193 | 3250 | 881  | 60  | 3240 | 900  | 50  | 810  | 2.02 |
| 5000 | .81  | .90 | .1000 | 4050 | 900  | 50  | .8818 | .1182 | 3290 | 882  | 59  | 3281 | 900  | 50  | 770  | 1.80 |
| 5000 | .82  | .90 | .1000 | 4050 | 900  | 50  | .8829 | .1171 | 3330 | 883  | 59  | 3321 | 900  | 50  | 729  | 1.60 |
| 5000 | .83  | .90 | .1000 | 4050 | 900  | 50  | .8840 | .1160 | 3369 | 884  | 58  | 3362 | 900  | 50  | 689  | 1.41 |
| 5000 | .84  | .90 | .1000 | 4050 | 900  | 50  | .8851 | .1149 | 3409 | 885  | 57  | 3402 | 900  | 50  | 648  | 1.23 |
| 5000 | .85  | .90 | .1000 | 4050 | 900  | 50  | .8862 | .1138 | 3449 | 886  | 57  | 3443 | 900  | 50  | 608  | 1.07 |
| 5000 | .86  | .90 | .1000 | 4050 | 900  | 50  | .8872 | .1128 | 3489 | 887  | 56  | 3483 | 900  | 50  | 567  | .92  |
| 5000 | .87  | .90 | .1000 | 4050 | 900  | 50  | .8882 | .1118 | 3529 | 888  | 56  | 3524 | 900  | 50  | 527  | .79  |
| 5000 | .88  | .90 | .1000 | 4050 | 900  | 50  | .8892 | .1108 | 3569 | 889  | 55  | 3564 | 900  | 50  | 486  | .66  |
| 5000 | .89  | .90 | .1000 | 4050 | 900  | 50  | .8902 | .1098 | 3609 | 890  | 55  | 3605 | 900  | 50  | 446  | .55  |
| 5000 | .90  | .90 | .1000 | 4050 | 900  | 50  | .8912 | .1088 | 3649 | 891  | 54  | 3645 | 900  | 50  | 405  | .45  |
| 5000 | .91  | .90 | .1000 | 4050 | 900  | 50  | .8921 | .1079 | 3689 | 892  | 54  | 3686 | 900  | 50  | 365  | .36  |
| 5000 | .92  | .90 | .1000 | 4050 | 900  | 50  | .8931 | .1069 | 3729 | 893  | 53  | 3726 | 900  | 50  | 324  | .28  |
| 5000 | .93  | .90 | .1000 | 4050 | 900  | 50  | .8940 | .1060 | 3770 | 894  | 53  | 3767 | 900  | 50  | 284  | .21  |
| 5000 | .94  | .90 | .1000 | 4050 | 900  | 50  | .8949 | .1051 | 3810 | 895  | 53  | 3807 | 900  | 50  | 243  | .16  |
| 5000 | .95  | .90 | .1000 | 4050 | 900  | 50  | .8958 | .1042 | 3850 | 896  | 52  | 3848 | 900  | 50  | 203  | .11  |
| 5000 | .96  | .90 | .1000 | 4050 | 900  | 50  | .8967 | .1033 | 3890 | 897  | 52  | 3888 | 900  | 50  | 162  | .07  |
| 5000 | .97  | .90 | .1000 | 4050 | 900  | 50  | .8975 | .1025 | 3930 | 898  | 51  | 3929 | 900  | 50  | 122  | .04  |
| 5000 | .98  | .90 | .1000 | 4050 | 900  | 50  | .8984 | .1016 | 3970 | 898  | 51  | 3969 | 900  | 50  | 81   | .02  |
| 5000 | .99  | .90 | .1000 | 4050 | 900  | 50  | .8992 | .1008 | 4010 | 899  | 50  | 4010 | 900  | 50  | 41   | .00  |
| 5000 | 1.00 | .90 | .1000 | 4050 | 900  | 50  | .9000 | .1000 | 4050 | 900  | 50  | 4050 | 900  | 50  | 0    | .00  |

|      |      |     |       |      |     |    |       |       |      |     |    |      |     |    |      |      |
|------|------|-----|-------|------|-----|----|-------|-------|------|-----|----|------|-----|----|------|------|
| 5000 | 1.01 | .90 | .1000 | 4050 | 900 | 50 | .9008 | .0992 | 4090 | 901 | 50 | 4091 | 900 | 50 | -41  | .00  |
| 5000 | 1.02 | .90 | .1000 | 4050 | 900 | 50 | .9016 | .0984 | 4130 | 902 | 49 | 4131 | 900 | 50 | -81  | .02  |
| 5000 | 1.03 | .90 | .1000 | 4050 | 900 | 50 | .9024 | .0976 | 4170 | 902 | 49 | 4172 | 900 | 50 | -122 | .04  |
| 5000 | 1.04 | .90 | .1000 | 4050 | 900 | 50 | .9031 | .0969 | 4210 | 903 | 48 | 4212 | 900 | 50 | -162 | .06  |
| 5000 | 1.05 | .90 | .1000 | 4050 | 900 | 50 | .9039 | .0961 | 4251 | 904 | 48 | 4253 | 900 | 50 | -203 | .10  |
| 5000 | 1.06 | .90 | .1000 | 4050 | 900 | 50 | .9046 | .0954 | 4291 | 905 | 48 | 4293 | 900 | 50 | -243 | .14  |
| 5000 | 1.07 | .90 | .1000 | 4050 | 900 | 50 | .9054 | .0946 | 4331 | 905 | 47 | 4334 | 900 | 50 | -284 | .19  |
| 5000 | 1.08 | .90 | .1000 | 4050 | 900 | 50 | .9061 | .0939 | 4371 | 906 | 47 | 4374 | 900 | 50 | -324 | .24  |
| 5000 | 1.09 | .90 | .1000 | 4050 | 900 | 50 | .9068 | .0932 | 4411 | 907 | 47 | 4415 | 900 | 50 | -365 | .30  |
| 5000 | 1.10 | .90 | .1000 | 4050 | 900 | 50 | .9075 | .0925 | 4451 | 907 | 46 | 4455 | 900 | 50 | -405 | .37  |
| 5000 | 1.11 | .90 | .1000 | 4050 | 900 | 50 | .9082 | .0918 | 4491 | 908 | 46 | 4496 | 900 | 50 | -446 | .44  |
| 5000 | 1.12 | .90 | .1000 | 4050 | 900 | 50 | .9089 | .0911 | 4532 | 909 | 46 | 4536 | 900 | 50 | -486 | .52  |
| 5000 | 1.13 | .90 | .1000 | 4050 | 900 | 50 | .9095 | .0905 | 4572 | 910 | 45 | 4577 | 900 | 50 | -527 | .61  |
| 5000 | 1.14 | .90 | .1000 | 4050 | 900 | 50 | .9102 | .0898 | 4612 | 910 | 45 | 4617 | 900 | 50 | -567 | .70  |
| 5000 | 1.15 | .90 | .1000 | 4050 | 900 | 50 | .9108 | .0892 | 4652 | 911 | 45 | 4658 | 900 | 50 | -608 | .79  |
| 5000 | 1.16 | .90 | .1000 | 4050 | 900 | 50 | .9115 | .0885 | 4692 | 911 | 44 | 4698 | 900 | 50 | -648 | .89  |
| 5000 | 1.17 | .90 | .1000 | 4050 | 900 | 50 | .9121 | .0879 | 4732 | 912 | 44 | 4739 | 900 | 50 | -689 | 1.00 |
| 5000 | 1.18 | .90 | .1000 | 4050 | 900 | 50 | .9127 | .0873 | 4773 | 913 | 44 | 4779 | 900 | 50 | -729 | 1.11 |
| 5000 | 1.19 | .90 | .1000 | 4050 | 900 | 50 | .9133 | .0867 | 4813 | 913 | 43 | 4820 | 900 | 50 | -770 | 1.23 |
| 5000 | 1.20 | .90 | .1000 | 4050 | 900 | 50 | .9139 | .0861 | 4853 | 914 | 43 | 4860 | 900 | 50 | -810 | 1.35 |
| 5000 | .80  | .95 | .0500 | 4513 | 475 | 13 | .9390 | .0610 | 3613 | 469 | 15 | 3610 | 475 | 13 | 903  | .56  |
| 5000 | .81  | .95 | .0500 | 4513 | 475 | 13 | .9397 | .0603 | 3658 | 470 | 15 | 3655 | 475 | 13 | 857  | .50  |
| 5000 | .82  | .95 | .0500 | 4513 | 475 | 13 | .9403 | .0597 | 3703 | 470 | 15 | 3700 | 475 | 13 | 812  | .45  |
| 5000 | .83  | .95 | .0500 | 4513 | 475 | 13 | .9409 | .0591 | 3748 | 470 | 15 | 3745 | 475 | 13 | 767  | .39  |
| 5000 | .84  | .95 | .0500 | 4513 | 475 | 13 | .9416 | .0584 | 3793 | 471 | 15 | 3791 | 475 | 13 | 722  | .34  |
| 5000 | .85  | .95 | .0500 | 4513 | 475 | 13 | .9422 | .0578 | 3838 | 471 | 14 | 3836 | 475 | 13 | 677  | .30  |
| 5000 | .86  | .95 | .0500 | 4513 | 475 | 13 | .9428 | .0572 | 3883 | 471 | 14 | 3881 | 475 | 13 | 632  | .26  |
| 5000 | .87  | .95 | .0500 | 4513 | 475 | 13 | .9434 | .0566 | 3928 | 472 | 14 | 3926 | 475 | 13 | 587  | .22  |
| 5000 | .88  | .95 | .0500 | 4513 | 475 | 13 | .9439 | .0561 | 3973 | 472 | 14 | 3971 | 475 | 13 | 542  | .18  |
| 5000 | .89  | .95 | .0500 | 4513 | 475 | 13 | .9445 | .0555 | 4018 | 472 | 14 | 4016 | 475 | 13 | 496  | .15  |
| 5000 | .90  | .95 | .0500 | 4513 | 475 | 13 | .9450 | .0550 | 4062 | 473 | 14 | 4061 | 475 | 13 | 451  | .13  |
| 5000 | .91  | .95 | .0500 | 4513 | 475 | 13 | .9456 | .0544 | 4107 | 473 | 14 | 4106 | 475 | 13 | 406  | .10  |
| 5000 | .92  | .95 | .0500 | 4513 | 475 | 13 | .9461 | .0539 | 4152 | 473 | 13 | 4152 | 475 | 13 | 361  | .08  |

|      |      |      |       |      |     |    |            |       |      |     |    |      |     |    |      |     |
|------|------|------|-------|------|-----|----|------------|-------|------|-----|----|------|-----|----|------|-----|
| 5000 | .93  | .95  | .0500 | 4513 | 475 | 13 | .9466      | .0534 | 4197 | 473 | 13 | 4197 | 475 | 13 | 316  | .06 |
| 5000 | .94  | .95  | .0500 | 4513 | 475 | 13 | .9471      | .0529 | 4242 | 474 | 13 | 4242 | 475 | 13 | 271  | .04 |
| 5000 | .95  | .95  | .0500 | 4513 | 475 | 13 | .9476      | .0524 | 4287 | 474 | 13 | 4287 | 475 | 13 | 226  | .03 |
| 5000 | .96  | .95  | .0500 | 4513 | 475 | 13 | .9481      | .0519 | 4332 | 474 | 13 | 4332 | 475 | 13 | 181  | .02 |
| 5000 | .97  | .95  | .0500 | 4513 | 475 | 13 | .9486      | .0514 | 4377 | 474 | 13 | 4377 | 475 | 13 | 135  | .01 |
| 5000 | .98  | .95  | .0500 | 4513 | 475 | 13 | .9491      | .0509 | 4422 | 475 | 13 | 4422 | 475 | 13 | 90   | .00 |
| 5000 | .99  | .95  | .0500 | 4513 | 475 | 13 | .9495      | .0505 | 4467 | 475 | 13 | 4467 | 475 | 13 | 45   | .00 |
| 5000 | 1.00 | .95  | .0500 | 4513 | 475 | 13 | .9500      | .0500 | 4513 | 475 | 13 | 4513 | 475 | 13 | 0    | .00 |
| 5000 | 1.01 | .95  | .0500 | 4513 | 475 | 13 | .9504      | .0496 | 4558 | 475 | 12 | 4558 | 475 | 13 | -45  | .00 |
| 5000 | 1.02 | .95  | .0500 | 4513 | 475 | 13 | .9509      | .0491 | 4603 | 475 | 12 | 4603 | 475 | 13 | -90  | .00 |
| 5000 | 1.03 | .95  | .0500 | 4513 | 475 | 13 | .9513      | .0487 | 4648 | 476 | 12 | 4648 | 475 | 13 | -135 | .01 |
| 5000 | 1.04 | .95  | .0500 | 4513 | 475 | 13 | .9517      | .0483 | 4693 | 476 | 12 | 4693 | 475 | 13 | -181 | .02 |
| 5000 | 1.05 | .95  | .0500 | 4513 | 475 | 13 | .9522      | .0478 | 4738 | 476 | 12 | 4738 | 475 | 13 | -226 | .03 |
| 5000 | 1.06 | .95  | .0500 | 4513 | 475 | 13 | .9526      | .0474 | 4783 | 476 | 12 | 4783 | 475 | 13 | -271 | .04 |
| 5000 | 1.07 | .95  | .0500 | 4513 | 475 | 13 | .9530      | .0470 | 4828 | 476 | 12 | 4828 | 475 | 13 | -316 | .05 |
| 5000 | 1.08 | .95  | .0500 | 4513 | 475 | 13 | .9534      | .0466 | 4873 | 477 | 12 | 4874 | 475 | 13 | -361 | .07 |
| 5000 | 1.09 | .95  | .0500 | 4513 | 475 | 13 | .9538      | .0462 | 4918 | 477 | 12 | 4919 | 475 | 13 | -406 | .08 |
| 5000 | 1.10 | .95  | .0500 | 4513 | 475 | 13 | .9541      | .0459 | 4963 | 477 | 11 | 4964 | 475 | 13 | -451 | .10 |
| 5000 | 1.11 | .95  | .0500 | 4513 | 475 | 13 | .9545      | .0455 | 5008 | 477 | 11 | 5009 | 475 | 13 | -496 | .12 |
| 5000 | 1.12 | .95  | .0500 | 4513 | 475 | 13 | .9549      | .0451 | 5053 | 477 | 11 | 5054 | 475 | 13 | -542 | .15 |
| 5000 | 1.13 | .95  | .0500 | 4513 | 475 | 13 | .9553      | .0447 | 5098 | 478 | 11 | 5099 | 475 | 13 | -587 | .17 |
| 5000 | 1.14 | .95  | .0500 | 4513 | 475 | 13 | .9556      | .0444 | 5143 | 478 | 11 | 5144 | 475 | 13 | -632 | .19 |
| 5000 | 1.15 | .95  | .0500 | 4513 | 475 | 13 | .9560      | .0440 | 5188 | 478 | 11 | 5189 | 475 | 13 | -677 | .22 |
| 5000 | 1.16 | .95  | .0500 | 4513 | 475 | 13 | .9563      | .0437 | 5233 | 478 | 11 | 5235 | 475 | 13 | -722 | .25 |
| 5000 | 1.17 | .95  | .0500 | 4513 | 475 | 13 | .9567      | .0433 | 5278 | 478 | 11 | 5280 | 475 | 13 | -767 | .28 |
| 5000 | 1.18 | .95  | .0500 | 4513 | 475 | 13 | .9570      | .0430 | 5323 | 478 | 11 | 5325 | 475 | 13 | -812 | .31 |
| 5000 | 1.19 | .95  | .0500 | 4513 | 475 | 13 | .9573      | .0427 | 5368 | 479 | 11 | 5370 | 475 | 13 | -857 | .34 |
| 5000 | 1.20 | .95  | .0500 | 4513 | 475 | 13 | .9576      | .0424 | 5413 | 479 | 11 | 5415 | 475 | 13 | -903 | .38 |
| 5000 | .80  | 1.00 | .0000 | 5000 | 0   | 0  | 1.000<br>0 | .0000 | 4000 | 0   | 0  | 4000 | 0   | 0  | 1000 | .38 |
| 5000 | .81  | 1.00 | .0000 | 5000 | 0   | 0  | 1.000<br>0 | .0000 | 4050 | 0   | 0  | 4050 | 0   | 0  | 950  | .38 |
| 5000 | .82  | 1.00 | .0000 | 5000 | 0   | 0  | 1.000      | .0000 | 4100 | 0   | 0  | 4100 | 0   | 0  | 900  | .38 |



|      |     |      |       |      |   |   |            |       |      |   |   |      |   |   |     |     |
|------|-----|------|-------|------|---|---|------------|-------|------|---|---|------|---|---|-----|-----|
|      |     |      |       |      |   |   | 0          |       |      |   |   |      |   |   |     |     |
| 5000 | .83 | 1.00 | .0000 | 5000 | 0 | 0 | 1.000<br>0 | .0000 | 4150 | 0 | 0 | 4150 | 0 | 0 | 850 | .38 |
| 5000 | .84 | 1.00 | .0000 | 5000 | 0 | 0 | 1.000<br>0 | .0000 | 4200 | 0 | 0 | 4200 | 0 | 0 | 800 | .38 |
| 5000 | .85 | 1.00 | .0000 | 5000 | 0 | 0 | 1.000<br>0 | .0000 | 4250 | 0 | 0 | 4250 | 0 | 0 | 750 | .38 |
| 5000 | .86 | 1.00 | .0000 | 5000 | 0 | 0 | 1.000<br>0 | .0000 | 4300 | 0 | 0 | 4300 | 0 | 0 | 700 | .38 |
| 5000 | .87 | 1.00 | .0000 | 5000 | 0 | 0 | 1.000<br>0 | .0000 | 4350 | 0 | 0 | 4350 | 0 | 0 | 650 | .38 |
| 5000 | .88 | 1.00 | .0000 | 5000 | 0 | 0 | 1.000<br>0 | .0000 | 4400 | 0 | 0 | 4400 | 0 | 0 | 600 | .38 |
| 5000 | .89 | 1.00 | .0000 | 5000 | 0 | 0 | 1.000<br>0 | .0000 | 4450 | 0 | 0 | 4450 | 0 | 0 | 550 | .38 |
| 5000 | .90 | 1.00 | .0000 | 5000 | 0 | 0 | 1.000<br>0 | .0000 | 4500 | 0 | 0 | 4500 | 0 | 0 | 500 | .38 |
| 5000 | .91 | 1.00 | .0000 | 5000 | 0 | 0 | 1.000<br>0 | .0000 | 4550 | 0 | 0 | 4550 | 0 | 0 | 450 | .38 |
| 5000 | .92 | 1.00 | .0000 | 5000 | 0 | 0 | 1.000<br>0 | .0000 | 4600 | 0 | 0 | 4600 | 0 | 0 | 400 | .38 |
| 5000 | .93 | 1.00 | .0000 | 5000 | 0 | 0 | 1.000<br>0 | .0000 | 4650 | 0 | 0 | 4650 | 0 | 0 | 350 | .38 |
| 5000 | .94 | 1.00 | .0000 | 5000 | 0 | 0 | 1.000<br>0 | .0000 | 4700 | 0 | 0 | 4700 | 0 | 0 | 300 | .38 |
| 5000 | .95 | 1.00 | .0000 | 5000 | 0 | 0 | 1.000<br>0 | .0000 | 4750 | 0 | 0 | 4750 | 0 | 0 | 250 | .38 |
| 5000 | .96 | 1.00 | .0000 | 5000 | 0 | 0 | 1.000<br>0 | .0000 | 4800 | 0 | 0 | 4800 | 0 | 0 | 200 | .38 |
| 5000 | .97 | 1.00 | .0000 | 5000 | 0 | 0 | 1.000<br>0 | .0000 | 4850 | 0 | 0 | 4850 | 0 | 0 | 150 | .38 |
| 5000 | .98 | 1.00 | .0000 | 5000 | 0 | 0 | 1.000<br>0 | .0000 | 4900 | 0 | 0 | 4900 | 0 | 0 | 100 | .38 |
| 5000 | .99 | 1.00 | .0000 | 5000 | 0 | 0 | 1.000      | .0000 | 4950 | 0 | 0 | 4950 | 0 | 0 | 50  | .38 |

|      |      |      |       |      |   |   |            |       |      |   |   |      |   |   |      |     |
|------|------|------|-------|------|---|---|------------|-------|------|---|---|------|---|---|------|-----|
|      |      |      |       |      |   |   | 0          |       |      |   |   |      |   |   |      |     |
| 5000 | 1.00 | 1.00 | .0000 | 5000 | 0 | 0 | 1.000<br>0 | .0000 | 5000 | 0 | 0 | 5000 | 0 | 0 | 0    | .38 |
| 5000 | 1.01 | 1.00 | .0000 | 5000 | 0 | 0 | 1.000<br>0 | .0000 | 5050 | 0 | 0 | 5050 | 0 | 0 | -50  | .38 |
| 5000 | 1.02 | 1.00 | .0000 | 5000 | 0 | 0 | 1.000<br>0 | .0000 | 5100 | 0 | 0 | 5100 | 0 | 0 | -100 | .38 |
| 5000 | 1.03 | 1.00 | .0000 | 5000 | 0 | 0 | 1.000<br>0 | .0000 | 5150 | 0 | 0 | 5150 | 0 | 0 | -150 | .38 |
| 5000 | 1.04 | 1.00 | .0000 | 5000 | 0 | 0 | 1.000<br>0 | .0000 | 5200 | 0 | 0 | 5200 | 0 | 0 | -200 | .38 |
| 5000 | 1.05 | 1.00 | .0000 | 5000 | 0 | 0 | 1.000<br>0 | .0000 | 5250 | 0 | 0 | 5250 | 0 | 0 | -250 | .38 |
| 5000 | 1.06 | 1.00 | .0000 | 5000 | 0 | 0 | 1.000<br>0 | .0000 | 5300 | 0 | 0 | 5300 | 0 | 0 | -300 | .38 |
| 5000 | 1.07 | 1.00 | .0000 | 5000 | 0 | 0 | 1.000<br>0 | .0000 | 5350 | 0 | 0 | 5350 | 0 | 0 | -350 | .38 |
| 5000 | 1.08 | 1.00 | .0000 | 5000 | 0 | 0 | 1.000<br>0 | .0000 | 5400 | 0 | 0 | 5400 | 0 | 0 | -400 | .38 |
| 5000 | 1.09 | 1.00 | .0000 | 5000 | 0 | 0 | 1.000<br>0 | .0000 | 5450 | 0 | 0 | 5450 | 0 | 0 | -450 | .38 |
| 5000 | 1.10 | 1.00 | .0000 | 5000 | 0 | 0 | 1.000<br>0 | .0000 | 5500 | 0 | 0 | 5500 | 0 | 0 | -500 | .38 |
| 5000 | 1.11 | 1.00 | .0000 | 5000 | 0 | 0 | 1.000<br>0 | .0000 | 5550 | 0 | 0 | 5550 | 0 | 0 | -550 | .38 |
| 5000 | 1.12 | 1.00 | .0000 | 5000 | 0 | 0 | 1.000<br>0 | .0000 | 5600 | 0 | 0 | 5600 | 0 | 0 | -600 | .38 |
| 5000 | 1.13 | 1.00 | .0000 | 5000 | 0 | 0 | 1.000<br>0 | .0000 | 5650 | 0 | 0 | 5650 | 0 | 0 | -650 | .38 |
| 5000 | 1.14 | 1.00 | .0000 | 5000 | 0 | 0 | 1.000<br>0 | .0000 | 5700 | 0 | 0 | 5700 | 0 | 0 | -700 | .38 |
| 5000 | 1.15 | 1.00 | .0000 | 5000 | 0 | 0 | 1.000<br>0 | .0000 | 5750 | 0 | 0 | 5750 | 0 | 0 | -750 | .38 |
| 5000 | 1.16 | 1.00 | .0000 | 5000 | 0 | 0 | 1.000      | .0000 | 5800 | 0 | 0 | 5800 | 0 | 0 | -800 | .38 |

|       |      |      |       |      |     |      |            |       |      |     |      |      |     |      |       |     |
|-------|------|------|-------|------|-----|------|------------|-------|------|-----|------|------|-----|------|-------|-----|
|       |      |      |       |      |     |      | 0          |       |      |     |      |      |     |      |       |     |
| 5000  | 1.17 | 1.00 | .0000 | 5000 | 0   | 0    | 1.000<br>0 | .0000 | 5850 | 0   | 0    | 5850 | 0   | 0    | -850  | .38 |
| 5000  | 1.18 | 1.00 | .0000 | 5000 | 0   | 0    | 1.000<br>0 | .0000 | 5900 | 0   | 0    | 5900 | 0   | 0    | -900  | .38 |
| 5000  | 1.19 | 1.00 | .0000 | 5000 | 0   | 0    | 1.000<br>0 | .0000 | 5950 | 0   | 0    | 5950 | 0   | 0    | -950  | .38 |
| 5000  | 1.20 | 1.00 | .0000 | 5000 | 0   | 0    | 1.000<br>0 | .0000 | 6000 | 0   | 0    | 6000 | 0   | 0    | -1000 | .38 |
| 10000 | .80  | .05  | .9500 | 25   | 950 | 9025 | .0495      | .9505 | 25   | 941 | 9030 | 20   | 950 | 9025 | 5     | .92 |
| 10000 | .81  | .05  | .9500 | 25   | 950 | 9025 | .0495      | .9505 | 25   | 941 | 9029 | 20   | 950 | 9025 | 5     | .83 |
| 10000 | .82  | .05  | .9500 | 25   | 950 | 9025 | .0496      | .9504 | 25   | 942 | 9029 | 21   | 950 | 9025 | 5     | .74 |
| 10000 | .83  | .05  | .9500 | 25   | 950 | 9025 | .0496      | .9504 | 25   | 942 | 9029 | 21   | 950 | 9025 | 4     | .66 |
| 10000 | .84  | .05  | .9500 | 25   | 950 | 9025 | .0496      | .9504 | 25   | 943 | 9029 | 21   | 950 | 9025 | 4     | .59 |
| 10000 | .85  | .05  | .9500 | 25   | 950 | 9025 | .0496      | .9504 | 25   | 943 | 9028 | 21   | 950 | 9025 | 4     | .52 |
| 10000 | .86  | .05  | .9500 | 25   | 950 | 9025 | .0497      | .9503 | 25   | 944 | 9028 | 22   | 950 | 9025 | 4     | .45 |
| 10000 | .87  | .05  | .9500 | 25   | 950 | 9025 | .0497      | .9503 | 25   | 944 | 9028 | 22   | 950 | 9025 | 3     | .39 |
| 10000 | .88  | .05  | .9500 | 25   | 950 | 9025 | .0497      | .9503 | 25   | 945 | 9028 | 22   | 950 | 9025 | 3     | .33 |
| 10000 | .89  | .05  | .9500 | 25   | 950 | 9025 | .0497      | .9503 | 25   | 945 | 9027 | 22   | 950 | 9025 | 3     | .28 |
| 10000 | .90  | .05  | .9500 | 25   | 950 | 9025 | .0498      | .9502 | 25   | 945 | 9027 | 23   | 950 | 9025 | 3     | .23 |
| 10000 | .91  | .05  | .9500 | 25   | 950 | 9025 | .0498      | .9502 | 25   | 946 | 9027 | 23   | 950 | 9025 | 2     | .18 |
| 10000 | .92  | .05  | .9500 | 25   | 950 | 9025 | .0498      | .9502 | 25   | 946 | 9027 | 23   | 950 | 9025 | 2     | .15 |
| 10000 | .93  | .05  | .9500 | 25   | 950 | 9025 | .0498      | .9502 | 25   | 947 | 9027 | 23   | 950 | 9025 | 2     | .11 |
| 10000 | .94  | .05  | .9500 | 25   | 950 | 9025 | .0499      | .9501 | 25   | 947 | 9026 | 24   | 950 | 9025 | 2     | .08 |
| 10000 | .95  | .05  | .9500 | 25   | 950 | 9025 | .0499      | .9501 | 25   | 948 | 9026 | 24   | 950 | 9025 | 1     | .06 |
| 10000 | .96  | .05  | .9500 | 25   | 950 | 9025 | .0499      | .9501 | 25   | 948 | 9026 | 24   | 950 | 9025 | 1     | .04 |
| 10000 | .97  | .05  | .9500 | 25   | 950 | 9025 | .0499      | .9501 | 25   | 949 | 9026 | 24   | 950 | 9025 | 1     | .02 |
| 10000 | .98  | .05  | .9500 | 25   | 950 | 9025 | .0500      | .9500 | 25   | 949 | 9025 | 25   | 950 | 9025 | 1     | .01 |
| 10000 | .99  | .05  | .9500 | 25   | 950 | 9025 | .0500      | .9500 | 25   | 950 | 9025 | 25   | 950 | 9025 | 0     | .00 |
| 10000 | 1.00 | .05  | .9500 | 25   | 950 | 9025 | .0500      | .9500 | 25   | 950 | 9025 | 25   | 950 | 9025 | 0     | .00 |
| 10000 | 1.01 | .05  | .9500 | 25   | 950 | 9025 | .0500      | .9500 | 25   | 950 | 9025 | 25   | 950 | 9025 | 0     | .00 |
| 10000 | 1.02 | .05  | .9500 | 25   | 950 | 9025 | .0500      | .9500 | 25   | 951 | 9025 | 26   | 950 | 9025 | -1    | .01 |
| 10000 | 1.03 | .05  | .9500 | 25   | 950 | 9025 | .0501      | .9499 | 25   | 951 | 9024 | 26   | 950 | 9025 | -1    | .02 |

|       |      |     |       |     |      |      |       |       |    |      |      |    |      |      |    |      |
|-------|------|-----|-------|-----|------|------|-------|-------|----|------|------|----|------|------|----|------|
| 10000 | 1.04 | .05 | .9500 | 25  | 950  | 9025 | .0501 | .9499 | 25 | 952  | 9024 | 26 | 950  | 9025 | -1 | .04  |
| 10000 | 1.05 | .05 | .9500 | 25  | 950  | 9025 | .0501 | .9499 | 25 | 952  | 9024 | 26 | 950  | 9025 | -1 | .06  |
| 10000 | 1.06 | .05 | .9500 | 25  | 950  | 9025 | .0501 | .9499 | 25 | 953  | 9024 | 27 | 950  | 9025 | -2 | .08  |
| 10000 | 1.07 | .05 | .9500 | 25  | 950  | 9025 | .0502 | .9498 | 25 | 953  | 9023 | 27 | 950  | 9025 | -2 | .11  |
| 10000 | 1.08 | .05 | .9500 | 25  | 950  | 9025 | .0502 | .9498 | 25 | 954  | 9023 | 27 | 950  | 9025 | -2 | .14  |
| 10000 | 1.09 | .05 | .9500 | 25  | 950  | 9025 | .0502 | .9498 | 25 | 954  | 9023 | 27 | 950  | 9025 | -2 | .18  |
| 10000 | 1.10 | .05 | .9500 | 25  | 950  | 9025 | .0502 | .9498 | 25 | 955  | 9023 | 28 | 950  | 9025 | -3 | .22  |
| 10000 | 1.11 | .05 | .9500 | 25  | 950  | 9025 | .0503 | .9497 | 25 | 955  | 9023 | 28 | 950  | 9025 | -3 | .27  |
| 10000 | 1.12 | .05 | .9500 | 25  | 950  | 9025 | .0503 | .9497 | 25 | 955  | 9022 | 28 | 950  | 9025 | -3 | .32  |
| 10000 | 1.13 | .05 | .9500 | 25  | 950  | 9025 | .0503 | .9497 | 25 | 956  | 9022 | 28 | 950  | 9025 | -3 | .38  |
| 10000 | 1.14 | .05 | .9500 | 25  | 950  | 9025 | .0503 | .9497 | 25 | 956  | 9022 | 29 | 950  | 9025 | -4 | .44  |
| 10000 | 1.15 | .05 | .9500 | 25  | 950  | 9025 | .0504 | .9496 | 25 | 957  | 9022 | 29 | 950  | 9025 | -4 | .50  |
| 10000 | 1.16 | .05 | .9500 | 25  | 950  | 9025 | .0504 | .9496 | 25 | 957  | 9021 | 29 | 950  | 9025 | -4 | .57  |
| 10000 | 1.17 | .05 | .9500 | 25  | 950  | 9025 | .0504 | .9496 | 25 | 958  | 9021 | 29 | 950  | 9025 | -4 | .64  |
| 10000 | 1.18 | .05 | .9500 | 25  | 950  | 9025 | .0504 | .9496 | 25 | 958  | 9021 | 30 | 950  | 9025 | -5 | .72  |
| 10000 | 1.19 | .05 | .9500 | 25  | 950  | 9025 | .0505 | .9495 | 25 | 959  | 9021 | 30 | 950  | 9025 | -5 | .80  |
| 10000 | 1.20 | .05 | .9500 | 25  | 950  | 9025 | .0505 | .9495 | 25 | 959  | 9020 | 30 | 950  | 9025 | -5 | .89  |
| 10000 | .80  | .10 | .9000 | 100 | 1800 | 8100 | .0982 | .9018 | 96 | 1768 | 8116 | 80 | 1800 | 8100 | 20 | 3.37 |
| 10000 | .81  | .10 | .9000 | 100 | 1800 | 8100 | .0983 | .9017 | 96 | 1769 | 8115 | 81 | 1800 | 8100 | 19 | 3.03 |
| 10000 | .82  | .10 | .9000 | 100 | 1800 | 8100 | .0984 | .9016 | 97 | 1771 | 8115 | 82 | 1800 | 8100 | 18 | 2.72 |
| 10000 | .83  | .10 | .9000 | 100 | 1800 | 8100 | .0985 | .9015 | 97 | 1772 | 8114 | 83 | 1800 | 8100 | 17 | 2.42 |
| 10000 | .84  | .10 | .9000 | 100 | 1800 | 8100 | .0986 | .9014 | 97 | 1774 | 8113 | 84 | 1800 | 8100 | 16 | 2.14 |
| 10000 | .85  | .10 | .9000 | 100 | 1800 | 8100 | .0986 | .9014 | 97 | 1776 | 8112 | 85 | 1800 | 8100 | 15 | 1.88 |
| 10000 | .86  | .10 | .9000 | 100 | 1800 | 8100 | .0987 | .9013 | 97 | 1777 | 8111 | 86 | 1800 | 8100 | 14 | 1.63 |
| 10000 | .87  | .10 | .9000 | 100 | 1800 | 8100 | .0988 | .9012 | 98 | 1779 | 8111 | 87 | 1800 | 8100 | 13 | 1.40 |
| 10000 | .88  | .10 | .9000 | 100 | 1800 | 8100 | .0989 | .9011 | 98 | 1781 | 8110 | 88 | 1800 | 8100 | 12 | 1.19 |
| 10000 | .89  | .10 | .9000 | 100 | 1800 | 8100 | .0990 | .9010 | 98 | 1782 | 8109 | 89 | 1800 | 8100 | 11 | 1.00 |
| 10000 | .90  | .10 | .9000 | 100 | 1800 | 8100 | .0991 | .9009 | 98 | 1784 | 8108 | 90 | 1800 | 8100 | 10 | .83  |
| 10000 | .91  | .10 | .9000 | 100 | 1800 | 8100 | .0992 | .9008 | 98 | 1785 | 8107 | 91 | 1800 | 8100 | 9  | .67  |
| 10000 | .92  | .10 | .9000 | 100 | 1800 | 8100 | .0993 | .9007 | 98 | 1787 | 8106 | 92 | 1800 | 8100 | 8  | .53  |
| 10000 | .93  | .10 | .9000 | 100 | 1800 | 8100 | .0994 | .9006 | 99 | 1789 | 8106 | 93 | 1800 | 8100 | 7  | .40  |
| 10000 | .94  | .10 | .9000 | 100 | 1800 | 8100 | .0995 | .9005 | 99 | 1790 | 8105 | 94 | 1800 | 8100 | 6  | .29  |
| 10000 | .95  | .10 | .9000 | 100 | 1800 | 8100 | .0995 | .9005 | 99 | 1792 | 8104 | 95 | 1800 | 8100 | 5  | .20  |

|       |      |     |       |     |      |      |       |       |     |      |      |     |      |      |     |      |
|-------|------|-----|-------|-----|------|------|-------|-------|-----|------|------|-----|------|------|-----|------|
| 10000 | .96  | .10 | .9000 | 100 | 1800 | 8100 | .0996 | .9004 | 99  | 1794 | 8103 | 96  | 1800 | 8100 | 4   | .13  |
| 10000 | .97  | .10 | .9000 | 100 | 1800 | 8100 | .0997 | .9003 | 99  | 1795 | 8102 | 97  | 1800 | 8100 | 3   | .07  |
| 10000 | .98  | .10 | .9000 | 100 | 1800 | 8100 | .0998 | .9002 | 100 | 1797 | 8102 | 98  | 1800 | 8100 | 2   | .03  |
| 10000 | .99  | .10 | .9000 | 100 | 1800 | 8100 | .0999 | .9001 | 100 | 1798 | 8101 | 99  | 1800 | 8100 | 1   | .01  |
| 10000 | 1.00 | .10 | .9000 | 100 | 1800 | 8100 | .1000 | .9000 | 100 | 1800 | 8100 | 100 | 1800 | 8100 | 0   | .00  |
| 10000 | 1.01 | .10 | .9000 | 100 | 1800 | 8100 | .1001 | .8999 | 100 | 1802 | 8099 | 101 | 1800 | 8100 | -1  | .01  |
| 10000 | 1.02 | .10 | .9000 | 100 | 1800 | 8100 | .1002 | .8998 | 100 | 1803 | 8098 | 102 | 1800 | 8100 | -2  | .03  |
| 10000 | 1.03 | .10 | .9000 | 100 | 1800 | 8100 | .1003 | .8997 | 101 | 1805 | 8098 | 103 | 1800 | 8100 | -3  | .07  |
| 10000 | 1.04 | .10 | .9000 | 100 | 1800 | 8100 | .1004 | .8996 | 101 | 1806 | 8097 | 104 | 1800 | 8100 | -4  | .13  |
| 10000 | 1.05 | .10 | .9000 | 100 | 1800 | 8100 | .1004 | .8996 | 101 | 1808 | 8096 | 105 | 1800 | 8100 | -5  | .20  |
| 10000 | 1.06 | .10 | .9000 | 100 | 1800 | 8100 | .1005 | .8995 | 101 | 1810 | 8095 | 106 | 1800 | 8100 | -6  | .29  |
| 10000 | 1.07 | .10 | .9000 | 100 | 1800 | 8100 | .1006 | .8994 | 101 | 1811 | 8094 | 107 | 1800 | 8100 | -7  | .39  |
| 10000 | 1.08 | .10 | .9000 | 100 | 1800 | 8100 | .1007 | .8993 | 102 | 1813 | 8094 | 108 | 1800 | 8100 | -8  | .51  |
| 10000 | 1.09 | .10 | .9000 | 100 | 1800 | 8100 | .1008 | .8992 | 102 | 1815 | 8093 | 109 | 1800 | 8100 | -9  | .65  |
| 10000 | 1.10 | .10 | .9000 | 100 | 1800 | 8100 | .1009 | .8991 | 102 | 1816 | 8092 | 110 | 1800 | 8100 | -10 | .79  |
| 10000 | 1.11 | .10 | .9000 | 100 | 1800 | 8100 | .1010 | .8990 | 102 | 1818 | 8091 | 111 | 1800 | 8100 | -11 | .96  |
| 10000 | 1.12 | .10 | .9000 | 100 | 1800 | 8100 | .1011 | .8989 | 102 | 1819 | 8090 | 112 | 1800 | 8100 | -12 | 1.14 |
| 10000 | 1.13 | .10 | .9000 | 100 | 1800 | 8100 | .1012 | .8988 | 102 | 1821 | 8089 | 113 | 1800 | 8100 | -13 | 1.34 |
| 10000 | 1.14 | .10 | .9000 | 100 | 1800 | 8100 | .1013 | .8987 | 103 | 1823 | 8089 | 114 | 1800 | 8100 | -14 | 1.55 |
| 10000 | 1.15 | .10 | .9000 | 100 | 1800 | 8100 | .1013 | .8987 | 103 | 1824 | 8088 | 115 | 1800 | 8100 | -15 | 1.77 |
| 10000 | 1.16 | .10 | .9000 | 100 | 1800 | 8100 | .1014 | .8986 | 103 | 1826 | 8087 | 116 | 1800 | 8100 | -16 | 2.01 |
| 10000 | 1.17 | .10 | .9000 | 100 | 1800 | 8100 | .1015 | .8985 | 103 | 1827 | 8086 | 117 | 1800 | 8100 | -17 | 2.27 |
| 10000 | 1.18 | .10 | .9000 | 100 | 1800 | 8100 | .1016 | .8984 | 103 | 1829 | 8085 | 118 | 1800 | 8100 | -18 | 2.54 |
| 10000 | 1.19 | .10 | .9000 | 100 | 1800 | 8100 | .1017 | .8983 | 104 | 1831 | 8085 | 119 | 1800 | 8100 | -19 | 2.82 |
| 10000 | 1.20 | .10 | .9000 | 100 | 1800 | 8100 | .1018 | .8982 | 104 | 1832 | 8084 | 120 | 1800 | 8100 | -20 | 3.12 |
| 10000 | .80  | .15 | .8500 | 225 | 2550 | 7225 | .1462 | .8538 | 213 | 2485 | 7258 | 180 | 2550 | 7225 | 45  | 6.88 |
| 10000 | .81  | .15 | .8500 | 225 | 2550 | 7225 | .1464 | .8536 | 213 | 2488 | 7256 | 182 | 2550 | 7225 | 43  | 6.19 |
| 10000 | .82  | .15 | .8500 | 225 | 2550 | 7225 | .1465 | .8535 | 214 | 2491 | 7254 | 185 | 2550 | 7225 | 41  | 5.54 |
| 10000 | .83  | .15 | .8500 | 225 | 2550 | 7225 | .1467 | .8533 | 214 | 2495 | 7253 | 187 | 2550 | 7225 | 38  | 4.93 |
| 10000 | .84  | .15 | .8500 | 225 | 2550 | 7225 | .1469 | .8531 | 215 | 2498 | 7251 | 189 | 2550 | 7225 | 36  | 4.35 |
| 10000 | .85  | .15 | .8500 | 225 | 2550 | 7225 | .1471 | .8529 | 216 | 2501 | 7249 | 191 | 2550 | 7225 | 34  | 3.82 |
| 10000 | .86  | .15 | .8500 | 225 | 2550 | 7225 | .1473 | .8527 | 216 | 2504 | 7248 | 194 | 2550 | 7225 | 32  | 3.31 |
| 10000 | .87  | .15 | .8500 | 225 | 2550 | 7225 | .1475 | .8525 | 217 | 2508 | 7246 | 196 | 2550 | 7225 | 29  | 2.85 |

|       |      |     |       |     |      |      |       |       |     |      |      |     |      |      |     |      |
|-------|------|-----|-------|-----|------|------|-------|-------|-----|------|------|-----|------|------|-----|------|
| 10000 | .88  | .15 | .8500 | 225 | 2550 | 7225 | .1477 | .8523 | 218 | 2511 | 7245 | 198 | 2550 | 7225 | 27  | 2.42 |
| 10000 | .89  | .15 | .8500 | 225 | 2550 | 7225 | .1479 | .8521 | 218 | 2514 | 7243 | 200 | 2550 | 7225 | 25  | 2.03 |
| 10000 | .90  | .15 | .8500 | 225 | 2550 | 7225 | .1481 | .8519 | 219 | 2517 | 7241 | 203 | 2550 | 7225 | 23  | 1.67 |
| 10000 | .91  | .15 | .8500 | 225 | 2550 | 7225 | .1483 | .8517 | 219 | 2521 | 7240 | 205 | 2550 | 7225 | 20  | 1.35 |
| 10000 | .92  | .15 | .8500 | 225 | 2550 | 7225 | .1485 | .8515 | 220 | 2524 | 7238 | 207 | 2550 | 7225 | 18  | 1.06 |
| 10000 | .93  | .15 | .8500 | 225 | 2550 | 7225 | .1487 | .8513 | 221 | 2527 | 7236 | 209 | 2550 | 7225 | 16  | .81  |
| 10000 | .94  | .15 | .8500 | 225 | 2550 | 7225 | .1489 | .8511 | 221 | 2530 | 7235 | 212 | 2550 | 7225 | 14  | .60  |
| 10000 | .95  | .15 | .8500 | 225 | 2550 | 7225 | .1490 | .8510 | 222 | 2534 | 7233 | 214 | 2550 | 7225 | 11  | .41  |
| 10000 | .96  | .15 | .8500 | 225 | 2550 | 7225 | .1492 | .8508 | 223 | 2537 | 7232 | 216 | 2550 | 7225 | 9   | .26  |
| 10000 | .97  | .15 | .8500 | 225 | 2550 | 7225 | .1494 | .8506 | 223 | 2540 | 7230 | 218 | 2550 | 7225 | 7   | .15  |
| 10000 | .98  | .15 | .8500 | 225 | 2550 | 7225 | .1496 | .8504 | 224 | 2543 | 7228 | 221 | 2550 | 7225 | 5   | .07  |
| 10000 | .99  | .15 | .8500 | 225 | 2550 | 7225 | .1498 | .8502 | 224 | 2547 | 7227 | 223 | 2550 | 7225 | 2   | .02  |
| 10000 | 1.00 | .15 | .8500 | 225 | 2550 | 7225 | .1500 | .8500 | 225 | 2550 | 7225 | 225 | 2550 | 7225 | 0   | .00  |
| 10000 | 1.01 | .15 | .8500 | 225 | 2550 | 7225 | .1502 | .8498 | 226 | 2553 | 7223 | 227 | 2550 | 7225 | -2  | .02  |
| 10000 | 1.02 | .15 | .8500 | 225 | 2550 | 7225 | .1504 | .8496 | 226 | 2556 | 7222 | 230 | 2550 | 7225 | -5  | .06  |
| 10000 | 1.03 | .15 | .8500 | 225 | 2550 | 7225 | .1506 | .8494 | 227 | 2560 | 7220 | 232 | 2550 | 7225 | -7  | .15  |
| 10000 | 1.04 | .15 | .8500 | 225 | 2550 | 7225 | .1508 | .8492 | 228 | 2563 | 7219 | 234 | 2550 | 7225 | -9  | .26  |
| 10000 | 1.05 | .15 | .8500 | 225 | 2550 | 7225 | .1510 | .8490 | 228 | 2566 | 7217 | 236 | 2550 | 7225 | -11 | .40  |
| 10000 | 1.06 | .15 | .8500 | 225 | 2550 | 7225 | .1511 | .8489 | 229 | 2569 | 7215 | 239 | 2550 | 7225 | -14 | .58  |
| 10000 | 1.07 | .15 | .8500 | 225 | 2550 | 7225 | .1513 | .8487 | 229 | 2573 | 7214 | 241 | 2550 | 7225 | -16 | .78  |
| 10000 | 1.08 | .15 | .8500 | 225 | 2550 | 7225 | .1515 | .8485 | 230 | 2576 | 7212 | 243 | 2550 | 7225 | -18 | 1.02 |
| 10000 | 1.09 | .15 | .8500 | 225 | 2550 | 7225 | .1517 | .8483 | 231 | 2579 | 7210 | 245 | 2550 | 7225 | -20 | 1.28 |
| 10000 | 1.10 | .15 | .8500 | 225 | 2550 | 7225 | .1519 | .8481 | 231 | 2582 | 7209 | 248 | 2550 | 7225 | -23 | 1.58 |
| 10000 | 1.11 | .15 | .8500 | 225 | 2550 | 7225 | .1521 | .8479 | 232 | 2586 | 7207 | 250 | 2550 | 7225 | -25 | 1.91 |
| 10000 | 1.12 | .15 | .8500 | 225 | 2550 | 7225 | .1523 | .8477 | 233 | 2589 | 7206 | 252 | 2550 | 7225 | -27 | 2.26 |
| 10000 | 1.13 | .15 | .8500 | 225 | 2550 | 7225 | .1525 | .8475 | 233 | 2592 | 7204 | 254 | 2550 | 7225 | -29 | 2.65 |
| 10000 | 1.14 | .15 | .8500 | 225 | 2550 | 7225 | .1527 | .8473 | 234 | 2595 | 7202 | 257 | 2550 | 7225 | -32 | 3.07 |
| 10000 | 1.15 | .15 | .8500 | 225 | 2550 | 7225 | .1529 | .8471 | 234 | 2599 | 7201 | 259 | 2550 | 7225 | -34 | 3.51 |
| 10000 | 1.16 | .15 | .8500 | 225 | 2550 | 7225 | .1530 | .8470 | 235 | 2602 | 7199 | 261 | 2550 | 7225 | -36 | 3.98 |
| 10000 | 1.17 | .15 | .8500 | 225 | 2550 | 7225 | .1532 | .8468 | 236 | 2605 | 7197 | 263 | 2550 | 7225 | -38 | 4.48 |
| 10000 | 1.18 | .15 | .8500 | 225 | 2550 | 7225 | .1534 | .8466 | 236 | 2608 | 7196 | 266 | 2550 | 7225 | -41 | 5.01 |
| 10000 | 1.19 | .15 | .8500 | 225 | 2550 | 7225 | .1536 | .8464 | 237 | 2612 | 7194 | 268 | 2550 | 7225 | -43 | 5.57 |
| 10000 | 1.20 | .15 | .8500 | 225 | 2550 | 7225 | .1538 | .8462 | 238 | 2615 | 7193 | 270 | 2550 | 7225 | -45 | 6.16 |

|       |      |     |       |     |      |      |       |       |     |      |      |     |      |      |     |       |
|-------|------|-----|-------|-----|------|------|-------|-------|-----|------|------|-----|------|------|-----|-------|
| 10000 | .80  | .20 | .8000 | 400 | 3200 | 6400 | .1935 | .8065 | 372 | 3097 | 6452 | 320 | 3200 | 6400 | 80  | 11.02 |
| 10000 | .81  | .20 | .8000 | 400 | 3200 | 6400 | .1939 | .8061 | 373 | 3102 | 6449 | 324 | 3200 | 6400 | 76  | 9.91  |
| 10000 | .82  | .20 | .8000 | 400 | 3200 | 6400 | .1942 | .8058 | 374 | 3107 | 6446 | 328 | 3200 | 6400 | 72  | 8.86  |
| 10000 | .83  | .20 | .8000 | 400 | 3200 | 6400 | .1945 | .8055 | 376 | 3112 | 6444 | 332 | 3200 | 6400 | 68  | 7.87  |
| 10000 | .84  | .20 | .8000 | 400 | 3200 | 6400 | .1948 | .8052 | 377 | 3118 | 6441 | 336 | 3200 | 6400 | 64  | 6.95  |
| 10000 | .85  | .20 | .8000 | 400 | 3200 | 6400 | .1952 | .8048 | 379 | 3123 | 6439 | 340 | 3200 | 6400 | 60  | 6.09  |
| 10000 | .86  | .20 | .8000 | 400 | 3200 | 6400 | .1955 | .8045 | 380 | 3128 | 6436 | 344 | 3200 | 6400 | 56  | 5.28  |
| 10000 | .87  | .20 | .8000 | 400 | 3200 | 6400 | .1958 | .8042 | 381 | 3133 | 6433 | 348 | 3200 | 6400 | 52  | 4.54  |
| 10000 | .88  | .20 | .8000 | 400 | 3200 | 6400 | .1961 | .8039 | 383 | 3138 | 6431 | 352 | 3200 | 6400 | 48  | 3.85  |
| 10000 | .89  | .20 | .8000 | 400 | 3200 | 6400 | .1965 | .8035 | 384 | 3143 | 6428 | 356 | 3200 | 6400 | 44  | 3.22  |
| 10000 | .90  | .20 | .8000 | 400 | 3200 | 6400 | .1968 | .8032 | 386 | 3149 | 6426 | 360 | 3200 | 6400 | 40  | 2.65  |
| 10000 | .91  | .20 | .8000 | 400 | 3200 | 6400 | .1971 | .8029 | 387 | 3154 | 6423 | 364 | 3200 | 6400 | 36  | 2.14  |
| 10000 | .92  | .20 | .8000 | 400 | 3200 | 6400 | .1974 | .8026 | 389 | 3159 | 6421 | 368 | 3200 | 6400 | 32  | 1.69  |
| 10000 | .93  | .20 | .8000 | 400 | 3200 | 6400 | .1978 | .8022 | 390 | 3164 | 6418 | 372 | 3200 | 6400 | 28  | 1.29  |
| 10000 | .94  | .20 | .8000 | 400 | 3200 | 6400 | .1981 | .8019 | 391 | 3169 | 6415 | 376 | 3200 | 6400 | 24  | .94   |
| 10000 | .95  | .20 | .8000 | 400 | 3200 | 6400 | .1984 | .8016 | 393 | 3174 | 6413 | 380 | 3200 | 6400 | 20  | .65   |
| 10000 | .96  | .20 | .8000 | 400 | 3200 | 6400 | .1987 | .8013 | 394 | 3179 | 6410 | 384 | 3200 | 6400 | 16  | .42   |
| 10000 | .97  | .20 | .8000 | 400 | 3200 | 6400 | .1990 | .8010 | 396 | 3185 | 6408 | 388 | 3200 | 6400 | 12  | .23   |
| 10000 | .98  | .20 | .8000 | 400 | 3200 | 6400 | .1994 | .8006 | 397 | 3190 | 6405 | 392 | 3200 | 6400 | 8   | .10   |
| 10000 | .99  | .20 | .8000 | 400 | 3200 | 6400 | .1997 | .8003 | 399 | 3195 | 6403 | 396 | 3200 | 6400 | 4   | .03   |
| 10000 | 1.00 | .20 | .8000 | 400 | 3200 | 6400 | .2000 | .8000 | 400 | 3200 | 6400 | 400 | 3200 | 6400 | 0   | .00   |
| 10000 | 1.01 | .20 | .8000 | 400 | 3200 | 6400 | .2003 | .7997 | 401 | 3205 | 6397 | 404 | 3200 | 6400 | -4  | .03   |
| 10000 | 1.02 | .20 | .8000 | 400 | 3200 | 6400 | .2006 | .7994 | 403 | 3210 | 6395 | 408 | 3200 | 6400 | -8  | .10   |
| 10000 | 1.03 | .20 | .8000 | 400 | 3200 | 6400 | .2010 | .7990 | 404 | 3215 | 6392 | 412 | 3200 | 6400 | -12 | .23   |
| 10000 | 1.04 | .20 | .8000 | 400 | 3200 | 6400 | .2013 | .7987 | 406 | 3220 | 6390 | 416 | 3200 | 6400 | -16 | .40   |
| 10000 | 1.05 | .20 | .8000 | 400 | 3200 | 6400 | .2016 | .7984 | 407 | 3226 | 6387 | 420 | 3200 | 6400 | -20 | .63   |
| 10000 | 1.06 | .20 | .8000 | 400 | 3200 | 6400 | .2019 | .7981 | 409 | 3231 | 6385 | 424 | 3200 | 6400 | -24 | .90   |
| 10000 | 1.07 | .20 | .8000 | 400 | 3200 | 6400 | .2022 | .7978 | 410 | 3236 | 6382 | 428 | 3200 | 6400 | -28 | 1.22  |
| 10000 | 1.08 | .20 | .8000 | 400 | 3200 | 6400 | .2026 | .7974 | 412 | 3241 | 6380 | 432 | 3200 | 6400 | -32 | 1.59  |
| 10000 | 1.09 | .20 | .8000 | 400 | 3200 | 6400 | .2029 | .7971 | 413 | 3246 | 6377 | 436 | 3200 | 6400 | -36 | 2.01  |
| 10000 | 1.10 | .20 | .8000 | 400 | 3200 | 6400 | .2032 | .7968 | 415 | 3251 | 6375 | 440 | 3200 | 6400 | -40 | 2.47  |
| 10000 | 1.11 | .20 | .8000 | 400 | 3200 | 6400 | .2035 | .7965 | 416 | 3256 | 6372 | 444 | 3200 | 6400 | -44 | 2.98  |
| 10000 | 1.12 | .20 | .8000 | 400 | 3200 | 6400 | .2038 | .7962 | 417 | 3261 | 6369 | 448 | 3200 | 6400 | -48 | 3.53  |

|       |      |     |       |     |      |      |       |       |     |      |      |     |      |      |     |       |
|-------|------|-----|-------|-----|------|------|-------|-------|-----|------|------|-----|------|------|-----|-------|
| 10000 | 1.13 | .20 | .8000 | 400 | 3200 | 6400 | .2041 | .7959 | 419 | 3266 | 6367 | 452 | 3200 | 6400 | -52 | 4.13  |
| 10000 | 1.14 | .20 | .8000 | 400 | 3200 | 6400 | .2045 | .7955 | 420 | 3271 | 6364 | 456 | 3200 | 6400 | -56 | 4.77  |
| 10000 | 1.15 | .20 | .8000 | 400 | 3200 | 6400 | .2048 | .7952 | 422 | 3276 | 6362 | 460 | 3200 | 6400 | -60 | 5.46  |
| 10000 | 1.16 | .20 | .8000 | 400 | 3200 | 6400 | .2051 | .7949 | 423 | 3281 | 6359 | 464 | 3200 | 6400 | -64 | 6.19  |
| 10000 | 1.17 | .20 | .8000 | 400 | 3200 | 6400 | .2054 | .7946 | 425 | 3286 | 6357 | 468 | 3200 | 6400 | -68 | 6.97  |
| 10000 | 1.18 | .20 | .8000 | 400 | 3200 | 6400 | .2057 | .7943 | 426 | 3292 | 6354 | 472 | 3200 | 6400 | -72 | 7.78  |
| 10000 | 1.19 | .20 | .8000 | 400 | 3200 | 6400 | .2060 | .7940 | 428 | 3297 | 6352 | 476 | 3200 | 6400 | -76 | 8.64  |
| 10000 | 1.20 | .20 | .8000 | 400 | 3200 | 6400 | .2063 | .7937 | 429 | 3302 | 6349 | 480 | 3200 | 6400 | -80 | 9.54  |
| 10000 | .80  | .25 | .7500 | 625 | 3750 | 5625 | .2405 | .7595 | 571 | 3608 | 5696 | 500 | 3750 | 5625 | 125 | 15.39 |
| 10000 | .81  | .25 | .7500 | 625 | 3750 | 5625 | .2410 | .7590 | 574 | 3615 | 5693 | 506 | 3750 | 5625 | 119 | 13.82 |
| 10000 | .82  | .25 | .7500 | 625 | 3750 | 5625 | .2415 | .7585 | 577 | 3622 | 5689 | 513 | 3750 | 5625 | 113 | 12.35 |
| 10000 | .83  | .25 | .7500 | 625 | 3750 | 5625 | .2419 | .7581 | 579 | 3629 | 5685 | 519 | 3750 | 5625 | 106 | 10.96 |
| 10000 | .84  | .25 | .7500 | 625 | 3750 | 5625 | .2424 | .7576 | 582 | 3636 | 5682 | 525 | 3750 | 5625 | 100 | 9.67  |
| 10000 | .85  | .25 | .7500 | 625 | 3750 | 5625 | .2429 | .7571 | 584 | 3644 | 5678 | 531 | 3750 | 5625 | 94  | 8.46  |
| 10000 | .86  | .25 | .7500 | 625 | 3750 | 5625 | .2434 | .7566 | 587 | 3651 | 5675 | 538 | 3750 | 5625 | 88  | 7.33  |
| 10000 | .87  | .25 | .7500 | 625 | 3750 | 5625 | .2439 | .7561 | 590 | 3658 | 5671 | 544 | 3750 | 5625 | 81  | 6.30  |
| 10000 | .88  | .25 | .7500 | 625 | 3750 | 5625 | .2443 | .7557 | 593 | 3665 | 5668 | 550 | 3750 | 5625 | 75  | 5.34  |
| 10000 | .89  | .25 | .7500 | 625 | 3750 | 5625 | .2448 | .7552 | 595 | 3672 | 5664 | 556 | 3750 | 5625 | 69  | 4.47  |
| 10000 | .90  | .25 | .7500 | 625 | 3750 | 5625 | .2453 | .7547 | 598 | 3679 | 5660 | 563 | 3750 | 5625 | 63  | 3.68  |
| 10000 | .91  | .25 | .7500 | 625 | 3750 | 5625 | .2458 | .7542 | 601 | 3686 | 5657 | 569 | 3750 | 5625 | 56  | 2.96  |
| 10000 | .92  | .25 | .7500 | 625 | 3750 | 5625 | .2462 | .7538 | 603 | 3693 | 5653 | 575 | 3750 | 5625 | 50  | 2.33  |
| 10000 | .93  | .25 | .7500 | 625 | 3750 | 5625 | .2467 | .7533 | 606 | 3701 | 5650 | 581 | 3750 | 5625 | 44  | 1.78  |
| 10000 | .94  | .25 | .7500 | 625 | 3750 | 5625 | .2472 | .7528 | 609 | 3708 | 5646 | 588 | 3750 | 5625 | 38  | 1.30  |
| 10000 | .95  | .25 | .7500 | 625 | 3750 | 5625 | .2476 | .7524 | 611 | 3715 | 5643 | 594 | 3750 | 5625 | 31  | .90   |
| 10000 | .96  | .25 | .7500 | 625 | 3750 | 5625 | .2481 | .7519 | 614 | 3722 | 5639 | 600 | 3750 | 5625 | 25  | .57   |
| 10000 | .97  | .25 | .7500 | 625 | 3750 | 5625 | .2486 | .7514 | 617 | 3729 | 5636 | 606 | 3750 | 5625 | 19  | .32   |
| 10000 | .98  | .25 | .7500 | 625 | 3750 | 5625 | .2491 | .7509 | 620 | 3736 | 5632 | 613 | 3750 | 5625 | 13  | .14   |
| 10000 | .99  | .25 | .7500 | 625 | 3750 | 5625 | .2495 | .7505 | 622 | 3743 | 5629 | 619 | 3750 | 5625 | 6   | .04   |
| 10000 | 1.00 | .25 | .7500 | 625 | 3750 | 5625 | .2500 | .7500 | 625 | 3750 | 5625 | 625 | 3750 | 5625 | 0   | .00   |
| 10000 | 1.01 | .25 | .7500 | 625 | 3750 | 5625 | .2505 | .7495 | 628 | 3757 | 5621 | 631 | 3750 | 5625 | -6  | .04   |
| 10000 | 1.02 | .25 | .7500 | 625 | 3750 | 5625 | .2509 | .7491 | 630 | 3764 | 5618 | 638 | 3750 | 5625 | -13 | .14   |
| 10000 | 1.03 | .25 | .7500 | 625 | 3750 | 5625 | .2514 | .7486 | 633 | 3771 | 5614 | 644 | 3750 | 5625 | -19 | .31   |
| 10000 | 1.04 | .25 | .7500 | 625 | 3750 | 5625 | .2519 | .7481 | 636 | 3778 | 5611 | 650 | 3750 | 5625 | -25 | .55   |



|       |      |     |       |     |      |      |       |       |     |      |      |     |      |      |      |       |
|-------|------|-----|-------|-----|------|------|-------|-------|-----|------|------|-----|------|------|------|-------|
| 10000 | 1.05 | .25 | .7500 | 625 | 3750 | 5625 | .2523 | .7477 | 639 | 3785 | 5607 | 656 | 3750 | 5625 | -31  | .86   |
| 10000 | 1.06 | .25 | .7500 | 625 | 3750 | 5625 | .2528 | .7472 | 641 | 3792 | 5604 | 663 | 3750 | 5625 | -38  | 1.23  |
| 10000 | 1.07 | .25 | .7500 | 625 | 3750 | 5625 | .2533 | .7467 | 644 | 3799 | 5600 | 669 | 3750 | 5625 | -44  | 1.67  |
| 10000 | 1.08 | .25 | .7500 | 625 | 3750 | 5625 | .2537 | .7463 | 647 | 3806 | 5597 | 675 | 3750 | 5625 | -50  | 2.17  |
| 10000 | 1.09 | .25 | .7500 | 625 | 3750 | 5625 | .2542 | .7458 | 650 | 3813 | 5594 | 681 | 3750 | 5625 | -56  | 2.74  |
| 10000 | 1.10 | .25 | .7500 | 625 | 3750 | 5625 | .2547 | .7453 | 653 | 3820 | 5590 | 688 | 3750 | 5625 | -63  | 3.37  |
| 10000 | 1.11 | .25 | .7500 | 625 | 3750 | 5625 | .2551 | .7449 | 655 | 3827 | 5587 | 694 | 3750 | 5625 | -69  | 4.06  |
| 10000 | 1.12 | .25 | .7500 | 625 | 3750 | 5625 | .2556 | .7444 | 658 | 3834 | 5583 | 700 | 3750 | 5625 | -75  | 4.81  |
| 10000 | 1.13 | .25 | .7500 | 625 | 3750 | 5625 | .2560 | .7440 | 661 | 3841 | 5580 | 706 | 3750 | 5625 | -81  | 5.62  |
| 10000 | 1.14 | .25 | .7500 | 625 | 3750 | 5625 | .2565 | .7435 | 664 | 3848 | 5576 | 713 | 3750 | 5625 | -88  | 6.49  |
| 10000 | 1.15 | .25 | .7500 | 625 | 3750 | 5625 | .2570 | .7430 | 667 | 3854 | 5573 | 719 | 3750 | 5625 | -94  | 7.42  |
| 10000 | 1.16 | .25 | .7500 | 625 | 3750 | 5625 | .2574 | .7426 | 669 | 3861 | 5569 | 725 | 3750 | 5625 | -100 | 8.40  |
| 10000 | 1.17 | .25 | .7500 | 625 | 3750 | 5625 | .2579 | .7421 | 672 | 3868 | 5566 | 731 | 3750 | 5625 | -106 | 9.45  |
| 10000 | 1.18 | .25 | .7500 | 625 | 3750 | 5625 | .2583 | .7417 | 675 | 3875 | 5562 | 738 | 3750 | 5625 | -113 | 10.55 |
| 10000 | 1.19 | .25 | .7500 | 625 | 3750 | 5625 | .2588 | .7412 | 678 | 3882 | 5559 | 744 | 3750 | 5625 | -119 | 11.70 |
| 10000 | 1.20 | .25 | .7500 | 625 | 3750 | 5625 | .2593 | .7407 | 681 | 3889 | 5556 | 750 | 3750 | 5625 | -125 | 12.91 |
| 10000 | .80  | .30 | .7000 | 900 | 4200 | 4900 | .2872 | .7128 | 810 | 4020 | 4990 | 720 | 4200 | 4900 | 180  | 19.60 |
| 10000 | .81  | .30 | .7000 | 900 | 4200 | 4900 | .2878 | .7122 | 814 | 4030 | 4985 | 729 | 4200 | 4900 | 171  | 17.60 |
| 10000 | .82  | .30 | .7000 | 900 | 4200 | 4900 | .2885 | .7115 | 819 | 4039 | 4981 | 738 | 4200 | 4900 | 162  | 15.71 |
| 10000 | .83  | .30 | .7000 | 900 | 4200 | 4900 | .2891 | .7109 | 823 | 4048 | 4976 | 747 | 4200 | 4900 | 153  | 13.94 |
| 10000 | .84  | .30 | .7000 | 900 | 4200 | 4900 | .2898 | .7102 | 828 | 4057 | 4972 | 756 | 4200 | 4900 | 144  | 12.28 |
| 10000 | .85  | .30 | .7000 | 900 | 4200 | 4900 | .2904 | .7096 | 832 | 4066 | 4967 | 765 | 4200 | 4900 | 135  | 10.73 |
| 10000 | .86  | .30 | .7000 | 900 | 4200 | 4900 | .2911 | .7089 | 837 | 4075 | 4963 | 774 | 4200 | 4900 | 126  | 9.30  |
| 10000 | .87  | .30 | .7000 | 900 | 4200 | 4900 | .2917 | .7083 | 841 | 4084 | 4958 | 783 | 4200 | 4900 | 117  | 7.98  |
| 10000 | .88  | .30 | .7000 | 900 | 4200 | 4900 | .2924 | .7076 | 845 | 4093 | 4953 | 792 | 4200 | 4900 | 108  | 6.76  |
| 10000 | .89  | .30 | .7000 | 900 | 4200 | 4900 | .2930 | .7070 | 850 | 4102 | 4949 | 801 | 4200 | 4900 | 99   | 5.65  |
| 10000 | .90  | .30 | .7000 | 900 | 4200 | 4900 | .2936 | .7064 | 855 | 4111 | 4945 | 810 | 4200 | 4900 | 90   | 4.64  |
| 10000 | .91  | .30 | .7000 | 900 | 4200 | 4900 | .2943 | .7057 | 859 | 4120 | 4940 | 819 | 4200 | 4900 | 81   | 3.74  |
| 10000 | .92  | .30 | .7000 | 900 | 4200 | 4900 | .2949 | .7051 | 864 | 4129 | 4936 | 828 | 4200 | 4900 | 72   | 2.94  |
| 10000 | .93  | .30 | .7000 | 900 | 4200 | 4900 | .2956 | .7044 | 868 | 4138 | 4931 | 837 | 4200 | 4900 | 63   | 2.24  |
| 10000 | .94  | .30 | .7000 | 900 | 4200 | 4900 | .2962 | .7038 | 873 | 4147 | 4927 | 846 | 4200 | 4900 | 54   | 1.64  |
| 10000 | .95  | .30 | .7000 | 900 | 4200 | 4900 | .2968 | .7032 | 877 | 4156 | 4922 | 855 | 4200 | 4900 | 45   | 1.13  |
| 10000 | .96  | .30 | .7000 | 900 | 4200 | 4900 | .2975 | .7025 | 882 | 4165 | 4918 | 864 | 4200 | 4900 | 36   | .72   |

|       |      |     |       |      |      |      |       |       |      |      |      |      |      |      |      |       |
|-------|------|-----|-------|------|------|------|-------|-------|------|------|------|------|------|------|------|-------|
| 10000 | .97  | .30 | .7000 | 900  | 4200 | 4900 | .2981 | .7019 | 886  | 4173 | 4913 | 873  | 4200 | 4900 | 27   | .40   |
| 10000 | .98  | .30 | .7000 | 900  | 4200 | 4900 | .2987 | .7013 | 891  | 4182 | 4909 | 882  | 4200 | 4900 | 18   | .18   |
| 10000 | .99  | .30 | .7000 | 900  | 4200 | 4900 | .2994 | .7006 | 895  | 4191 | 4904 | 891  | 4200 | 4900 | 9    | .04   |
| 10000 | 1.00 | .30 | .7000 | 900  | 4200 | 4900 | .3000 | .7000 | 900  | 4200 | 4900 | 900  | 4200 | 4900 | 0    | .00   |
| 10000 | 1.01 | .30 | .7000 | 900  | 4200 | 4900 | .3006 | .6994 | 905  | 4209 | 4896 | 909  | 4200 | 4900 | -9   | .04   |
| 10000 | 1.02 | .30 | .7000 | 900  | 4200 | 4900 | .3013 | .6987 | 909  | 4218 | 4891 | 918  | 4200 | 4900 | -18  | .17   |
| 10000 | 1.03 | .30 | .7000 | 900  | 4200 | 4900 | .3019 | .6981 | 914  | 4226 | 4887 | 927  | 4200 | 4900 | -27  | .39   |
| 10000 | 1.04 | .30 | .7000 | 900  | 4200 | 4900 | .3025 | .6975 | 918  | 4235 | 4882 | 936  | 4200 | 4900 | -36  | .69   |
| 10000 | 1.05 | .30 | .7000 | 900  | 4200 | 4900 | .3031 | .6969 | 923  | 4244 | 4878 | 945  | 4200 | 4900 | -45  | 1.07  |
| 10000 | 1.06 | .30 | .7000 | 900  | 4200 | 4900 | .3038 | .6962 | 928  | 4253 | 4874 | 954  | 4200 | 4900 | -54  | 1.54  |
| 10000 | 1.07 | .30 | .7000 | 900  | 4200 | 4900 | .3044 | .6956 | 932  | 4261 | 4869 | 963  | 4200 | 4900 | -63  | 2.09  |
| 10000 | 1.08 | .30 | .7000 | 900  | 4200 | 4900 | .3050 | .6950 | 937  | 4270 | 4865 | 972  | 4200 | 4900 | -72  | 2.71  |
| 10000 | 1.09 | .30 | .7000 | 900  | 4200 | 4900 | .3056 | .6944 | 942  | 4279 | 4861 | 981  | 4200 | 4900 | -81  | 3.41  |
| 10000 | 1.10 | .30 | .7000 | 900  | 4200 | 4900 | .3062 | .6938 | 946  | 4287 | 4856 | 990  | 4200 | 4900 | -90  | 4.19  |
| 10000 | 1.11 | .30 | .7000 | 900  | 4200 | 4900 | .3069 | .6931 | 951  | 4296 | 4852 | 999  | 4200 | 4900 | -99  | 5.05  |
| 10000 | 1.12 | .30 | .7000 | 900  | 4200 | 4900 | .3075 | .6925 | 956  | 4305 | 4848 | 1008 | 4200 | 4900 | -108 | 5.98  |
| 10000 | 1.13 | .30 | .7000 | 900  | 4200 | 4900 | .3081 | .6919 | 960  | 4313 | 4843 | 1017 | 4200 | 4900 | -117 | 6.98  |
| 10000 | 1.14 | .30 | .7000 | 900  | 4200 | 4900 | .3087 | .6913 | 965  | 4322 | 4839 | 1026 | 4200 | 4900 | -126 | 8.06  |
| 10000 | 1.15 | .30 | .7000 | 900  | 4200 | 4900 | .3093 | .6907 | 970  | 4331 | 4835 | 1035 | 4200 | 4900 | -135 | 9.21  |
| 10000 | 1.16 | .30 | .7000 | 900  | 4200 | 4900 | .3099 | .6901 | 974  | 4339 | 4830 | 1044 | 4200 | 4900 | -144 | 10.43 |
| 10000 | 1.17 | .30 | .7000 | 900  | 4200 | 4900 | .3105 | .6895 | 979  | 4348 | 4826 | 1053 | 4200 | 4900 | -153 | 11.71 |
| 10000 | 1.18 | .30 | .7000 | 900  | 4200 | 4900 | .3112 | .6888 | 984  | 4356 | 4822 | 1062 | 4200 | 4900 | -162 | 13.07 |
| 10000 | 1.19 | .30 | .7000 | 900  | 4200 | 4900 | .3118 | .6882 | 989  | 4365 | 4818 | 1071 | 4200 | 4900 | -171 | 14.49 |
| 10000 | 1.20 | .30 | .7000 | 900  | 4200 | 4900 | .3124 | .6876 | 993  | 4373 | 4813 | 1080 | 4200 | 4900 | -180 | 15.98 |
| 10000 | .80  | .35 | .6500 | 1225 | 4550 | 4225 | .3337 | .6663 | 1086 | 4338 | 4331 | 980  | 4550 | 4225 | 245  | 23.35 |
| 10000 | .81  | .35 | .6500 | 1225 | 4550 | 4225 | .3345 | .6655 | 1093 | 4349 | 4326 | 992  | 4550 | 4225 | 233  | 20.94 |
| 10000 | .82  | .35 | .6500 | 1225 | 4550 | 4225 | .3353 | .6647 | 1100 | 4359 | 4320 | 1005 | 4550 | 4225 | 221  | 18.68 |
| 10000 | .83  | .35 | .6500 | 1225 | 4550 | 4225 | .3362 | .6638 | 1107 | 4370 | 4315 | 1017 | 4550 | 4225 | 208  | 16.56 |
| 10000 | .84  | .35 | .6500 | 1225 | 4550 | 4225 | .3370 | .6630 | 1113 | 4381 | 4309 | 1029 | 4550 | 4225 | 196  | 14.58 |
| 10000 | .85  | .35 | .6500 | 1225 | 4550 | 4225 | .3378 | .6622 | 1120 | 4392 | 4304 | 1041 | 4550 | 4225 | 184  | 12.73 |
| 10000 | .86  | .35 | .6500 | 1225 | 4550 | 4225 | .3387 | .6613 | 1127 | 4403 | 4299 | 1054 | 4550 | 4225 | 172  | 11.02 |
| 10000 | .87  | .35 | .6500 | 1225 | 4550 | 4225 | .3395 | .6605 | 1134 | 4413 | 4293 | 1066 | 4550 | 4225 | 159  | 9.45  |
| 10000 | .88  | .35 | .6500 | 1225 | 4550 | 4225 | .3403 | .6597 | 1141 | 4424 | 4288 | 1078 | 4550 | 4225 | 147  | 8.00  |

|       |      |     |       |      |      |      |       |       |      |      |      |      |      |      |      |       |
|-------|------|-----|-------|------|------|------|-------|-------|------|------|------|------|------|------|------|-------|
| 10000 | .89  | .35 | .6500 | 1225 | 4550 | 4225 | .3411 | .6589 | 1148 | 4435 | 4283 | 1090 | 4550 | 4225 | 135  | 6.68  |
| 10000 | .90  | .35 | .6500 | 1225 | 4550 | 4225 | .3419 | .6581 | 1155 | 4445 | 4277 | 1103 | 4550 | 4225 | 123  | 5.49  |
| 10000 | .91  | .35 | .6500 | 1225 | 4550 | 4225 | .3428 | .6572 | 1162 | 4456 | 4272 | 1115 | 4550 | 4225 | 110  | 4.42  |
| 10000 | .92  | .35 | .6500 | 1225 | 4550 | 4225 | .3436 | .6564 | 1169 | 4466 | 4267 | 1127 | 4550 | 4225 | 98   | 3.47  |
| 10000 | .93  | .35 | .6500 | 1225 | 4550 | 4225 | .3444 | .6556 | 1176 | 4477 | 4262 | 1139 | 4550 | 4225 | 86   | 2.64  |
| 10000 | .94  | .35 | .6500 | 1225 | 4550 | 4225 | .3452 | .6548 | 1183 | 4487 | 4256 | 1152 | 4550 | 4225 | 74   | 1.93  |
| 10000 | .95  | .35 | .6500 | 1225 | 4550 | 4225 | .3460 | .6540 | 1190 | 4498 | 4251 | 1164 | 4550 | 4225 | 61   | 1.33  |
| 10000 | .96  | .35 | .6500 | 1225 | 4550 | 4225 | .3468 | .6532 | 1197 | 4508 | 4246 | 1176 | 4550 | 4225 | 49   | .85   |
| 10000 | .97  | .35 | .6500 | 1225 | 4550 | 4225 | .3476 | .6524 | 1204 | 4519 | 4241 | 1188 | 4550 | 4225 | 37   | .47   |
| 10000 | .98  | .35 | .6500 | 1225 | 4550 | 4225 | .3484 | .6516 | 1211 | 4529 | 4235 | 1201 | 4550 | 4225 | 25   | .21   |
| 10000 | .99  | .35 | .6500 | 1225 | 4550 | 4225 | .3492 | .6508 | 1218 | 4540 | 4230 | 1213 | 4550 | 4225 | 12   | .05   |
| 10000 | 1.00 | .35 | .6500 | 1225 | 4550 | 4225 | .3500 | .6500 | 1225 | 4550 | 4225 | 1225 | 4550 | 4225 | 0    | .00   |
| 10000 | 1.01 | .35 | .6500 | 1225 | 4550 | 4225 | .3508 | .6492 | 1232 | 4560 | 4220 | 1237 | 4550 | 4225 | -12  | .05   |
| 10000 | 1.02 | .35 | .6500 | 1225 | 4550 | 4225 | .3516 | .6484 | 1239 | 4571 | 4215 | 1250 | 4550 | 4225 | -25  | .20   |
| 10000 | 1.03 | .35 | .6500 | 1225 | 4550 | 4225 | .3524 | .6476 | 1246 | 4581 | 4210 | 1262 | 4550 | 4225 | -37  | .46   |
| 10000 | 1.04 | .35 | .6500 | 1225 | 4550 | 4225 | .3532 | .6468 | 1253 | 4591 | 4204 | 1274 | 4550 | 4225 | -49  | .81   |
| 10000 | 1.05 | .35 | .6500 | 1225 | 4550 | 4225 | .3540 | .6460 | 1261 | 4601 | 4199 | 1286 | 4550 | 4225 | -61  | 1.26  |
| 10000 | 1.06 | .35 | .6500 | 1225 | 4550 | 4225 | .3547 | .6453 | 1268 | 4612 | 4194 | 1299 | 4550 | 4225 | -74  | 1.80  |
| 10000 | 1.07 | .35 | .6500 | 1225 | 4550 | 4225 | .3555 | .6445 | 1275 | 4622 | 4189 | 1311 | 4550 | 4225 | -86  | 2.44  |
| 10000 | 1.08 | .35 | .6500 | 1225 | 4550 | 4225 | .3563 | .6437 | 1282 | 4632 | 4184 | 1323 | 4550 | 4225 | -98  | 3.17  |
| 10000 | 1.09 | .35 | .6500 | 1225 | 4550 | 4225 | .3571 | .6429 | 1289 | 4642 | 4179 | 1335 | 4550 | 4225 | -110 | 3.98  |
| 10000 | 1.10 | .35 | .6500 | 1225 | 4550 | 4225 | .3579 | .6421 | 1296 | 4652 | 4174 | 1348 | 4550 | 4225 | -123 | 4.89  |
| 10000 | 1.11 | .35 | .6500 | 1225 | 4550 | 4225 | .3586 | .6414 | 1304 | 4662 | 4169 | 1360 | 4550 | 4225 | -135 | 5.89  |
| 10000 | 1.12 | .35 | .6500 | 1225 | 4550 | 4225 | .3594 | .6406 | 1311 | 4672 | 4164 | 1372 | 4550 | 4225 | -147 | 6.97  |
| 10000 | 1.13 | .35 | .6500 | 1225 | 4550 | 4225 | .3602 | .6398 | 1318 | 4682 | 4159 | 1384 | 4550 | 4225 | -159 | 8.13  |
| 10000 | 1.14 | .35 | .6500 | 1225 | 4550 | 4225 | .3610 | .6390 | 1325 | 4692 | 4154 | 1397 | 4550 | 4225 | -172 | 9.38  |
| 10000 | 1.15 | .35 | .6500 | 1225 | 4550 | 4225 | .3617 | .6383 | 1333 | 4702 | 4149 | 1409 | 4550 | 4225 | -184 | 10.71 |
| 10000 | 1.16 | .35 | .6500 | 1225 | 4550 | 4225 | .3625 | .6375 | 1340 | 4712 | 4144 | 1421 | 4550 | 4225 | -196 | 12.11 |
| 10000 | 1.17 | .35 | .6500 | 1225 | 4550 | 4225 | .3633 | .6367 | 1347 | 4722 | 4139 | 1433 | 4550 | 4225 | -208 | 13.60 |
| 10000 | 1.18 | .35 | .6500 | 1225 | 4550 | 4225 | .3640 | .6360 | 1354 | 4732 | 4134 | 1446 | 4550 | 4225 | -221 | 15.17 |
| 10000 | 1.19 | .35 | .6500 | 1225 | 4550 | 4225 | .3648 | .6352 | 1362 | 4742 | 4129 | 1458 | 4550 | 4225 | -233 | 16.81 |
| 10000 | 1.20 | .35 | .6500 | 1225 | 4550 | 4225 | .3655 | .6345 | 1369 | 4752 | 4124 | 1470 | 4550 | 4225 | -245 | 18.53 |
| 10000 | .80  | .40 | .6000 | 1600 | 4800 | 3600 | .3802 | .6198 | 1399 | 4562 | 3719 | 1280 | 4800 | 3600 | 320  | 26.35 |

|       |      |     |       |      |      |      |       |       |      |      |      |      |      |      |      |       |
|-------|------|-----|-------|------|------|------|-------|-------|------|------|------|------|------|------|------|-------|
| 10000 | .81  | .40 | .6000 | 1600 | 4800 | 3600 | .3812 | .6188 | 1409 | 4574 | 3713 | 1296 | 4800 | 3600 | 304  | 23.61 |
| 10000 | .82  | .40 | .6000 | 1600 | 4800 | 3600 | .3822 | .6178 | 1419 | 4586 | 3707 | 1312 | 4800 | 3600 | 288  | 21.05 |
| 10000 | .83  | .40 | .6000 | 1600 | 4800 | 3600 | .3832 | .6168 | 1429 | 4599 | 3701 | 1328 | 4800 | 3600 | 272  | 18.64 |
| 10000 | .84  | .40 | .6000 | 1600 | 4800 | 3600 | .3842 | .6158 | 1439 | 4611 | 3695 | 1344 | 4800 | 3600 | 256  | 16.40 |
| 10000 | .85  | .40 | .6000 | 1600 | 4800 | 3600 | .3852 | .6148 | 1449 | 4623 | 3689 | 1360 | 4800 | 3600 | 240  | 14.32 |
| 10000 | .86  | .40 | .6000 | 1600 | 4800 | 3600 | .3863 | .6137 | 1458 | 4635 | 3682 | 1376 | 4800 | 3600 | 224  | 12.38 |
| 10000 | .87  | .40 | .6000 | 1600 | 4800 | 3600 | .3873 | .6127 | 1468 | 4647 | 3676 | 1392 | 4800 | 3600 | 208  | 10.61 |
| 10000 | .88  | .40 | .6000 | 1600 | 4800 | 3600 | .3883 | .6117 | 1478 | 4659 | 3670 | 1408 | 4800 | 3600 | 192  | 8.98  |
| 10000 | .89  | .40 | .6000 | 1600 | 4800 | 3600 | .3893 | .6107 | 1488 | 4671 | 3664 | 1424 | 4800 | 3600 | 176  | 7.49  |
| 10000 | .90  | .40 | .6000 | 1600 | 4800 | 3600 | .3902 | .6098 | 1499 | 4683 | 3659 | 1440 | 4800 | 3600 | 160  | 6.15  |
| 10000 | .91  | .40 | .6000 | 1600 | 4800 | 3600 | .3912 | .6088 | 1509 | 4695 | 3653 | 1456 | 4800 | 3600 | 144  | 4.95  |
| 10000 | .92  | .40 | .6000 | 1600 | 4800 | 3600 | .3922 | .6078 | 1519 | 4707 | 3647 | 1472 | 4800 | 3600 | 128  | 3.88  |
| 10000 | .93  | .40 | .6000 | 1600 | 4800 | 3600 | .3932 | .6068 | 1529 | 4718 | 3641 | 1488 | 4800 | 3600 | 112  | 2.95  |
| 10000 | .94  | .40 | .6000 | 1600 | 4800 | 3600 | .3942 | .6058 | 1539 | 4730 | 3635 | 1504 | 4800 | 3600 | 96   | 2.16  |
| 10000 | .95  | .40 | .6000 | 1600 | 4800 | 3600 | .3952 | .6048 | 1549 | 4742 | 3629 | 1520 | 4800 | 3600 | 80   | 1.49  |
| 10000 | .96  | .40 | .6000 | 1600 | 4800 | 3600 | .3961 | .6039 | 1559 | 4754 | 3623 | 1536 | 4800 | 3600 | 64   | .95   |
| 10000 | .97  | .40 | .6000 | 1600 | 4800 | 3600 | .3971 | .6029 | 1569 | 4765 | 3617 | 1552 | 4800 | 3600 | 48   | .53   |
| 10000 | .98  | .40 | .6000 | 1600 | 4800 | 3600 | .3981 | .6019 | 1580 | 4777 | 3612 | 1568 | 4800 | 3600 | 32   | .23   |
| 10000 | .99  | .40 | .6000 | 1600 | 4800 | 3600 | .3990 | .6010 | 1590 | 4788 | 3606 | 1584 | 4800 | 3600 | 16   | .06   |
| 10000 | 1.00 | .40 | .6000 | 1600 | 4800 | 3600 | .4000 | .6000 | 1600 | 4800 | 3600 | 1600 | 4800 | 3600 | 0    | .00   |
| 10000 | 1.01 | .40 | .6000 | 1600 | 4800 | 3600 | .4010 | .5990 | 1610 | 4812 | 3594 | 1616 | 4800 | 3600 | -16  | .06   |
| 10000 | 1.02 | .40 | .6000 | 1600 | 4800 | 3600 | .4019 | .5981 | 1621 | 4823 | 3589 | 1632 | 4800 | 3600 | -32  | .23   |
| 10000 | 1.03 | .40 | .6000 | 1600 | 4800 | 3600 | .4029 | .5971 | 1631 | 4834 | 3583 | 1648 | 4800 | 3600 | -48  | .51   |
| 10000 | 1.04 | .40 | .6000 | 1600 | 4800 | 3600 | .4038 | .5962 | 1641 | 4846 | 3577 | 1664 | 4800 | 3600 | -64  | .90   |
| 10000 | 1.05 | .40 | .6000 | 1600 | 4800 | 3600 | .4048 | .5952 | 1651 | 4857 | 3571 | 1680 | 4800 | 3600 | -80  | 1.40  |
| 10000 | 1.06 | .40 | .6000 | 1600 | 4800 | 3600 | .4057 | .5943 | 1662 | 4868 | 3566 | 1696 | 4800 | 3600 | -96  | 2.00  |
| 10000 | 1.07 | .40 | .6000 | 1600 | 4800 | 3600 | .4066 | .5934 | 1672 | 4880 | 3560 | 1712 | 4800 | 3600 | -112 | 2.70  |
| 10000 | 1.08 | .40 | .6000 | 1600 | 4800 | 3600 | .4076 | .5924 | 1683 | 4891 | 3555 | 1728 | 4800 | 3600 | -128 | 3.51  |
| 10000 | 1.09 | .40 | .6000 | 1600 | 4800 | 3600 | .4085 | .5915 | 1693 | 4902 | 3549 | 1744 | 4800 | 3600 | -144 | 4.41  |
| 10000 | 1.10 | .40 | .6000 | 1600 | 4800 | 3600 | .4094 | .5906 | 1703 | 4913 | 3543 | 1760 | 4800 | 3600 | -160 | 5.41  |
| 10000 | 1.11 | .40 | .6000 | 1600 | 4800 | 3600 | .4104 | .5896 | 1714 | 4925 | 3538 | 1776 | 4800 | 3600 | -176 | 6.51  |
| 10000 | 1.12 | .40 | .6000 | 1600 | 4800 | 3600 | .4113 | .5887 | 1724 | 4936 | 3532 | 1792 | 4800 | 3600 | -192 | 7.70  |
| 10000 | 1.13 | .40 | .6000 | 1600 | 4800 | 3600 | .4122 | .5878 | 1735 | 4947 | 3527 | 1808 | 4800 | 3600 | -208 | 8.98  |

|       |      |     |       |      |      |      |       |       |      |      |      |      |      |      |      |       |
|-------|------|-----|-------|------|------|------|-------|-------|------|------|------|------|------|------|------|-------|
| 10000 | 1.14 | .40 | .6000 | 1600 | 4800 | 3600 | .4131 | .5869 | 1745 | 4958 | 3521 | 1824 | 4800 | 3600 | -224 | 10.35 |
| 10000 | 1.15 | .40 | .6000 | 1600 | 4800 | 3600 | .4141 | .5859 | 1756 | 4969 | 3516 | 1840 | 4800 | 3600 | -240 | 11.81 |
| 10000 | 1.16 | .40 | .6000 | 1600 | 4800 | 3600 | .4150 | .5850 | 1766 | 4980 | 3510 | 1856 | 4800 | 3600 | -256 | 13.36 |
| 10000 | 1.17 | .40 | .6000 | 1600 | 4800 | 3600 | .4159 | .5841 | 1777 | 4991 | 3505 | 1872 | 4800 | 3600 | -272 | 14.99 |
| 10000 | 1.18 | .40 | .6000 | 1600 | 4800 | 3600 | .4168 | .5832 | 1787 | 5002 | 3499 | 1888 | 4800 | 3600 | -288 | 16.71 |
| 10000 | 1.19 | .40 | .6000 | 1600 | 4800 | 3600 | .4177 | .5823 | 1798 | 5012 | 3494 | 1904 | 4800 | 3600 | -304 | 18.51 |
| 10000 | 1.20 | .40 | .6000 | 1600 | 4800 | 3600 | .4186 | .5814 | 1808 | 5023 | 3488 | 1920 | 4800 | 3600 | -320 | 20.39 |
| 10000 | .80  | .45 | .5500 | 2025 | 4950 | 3025 | .4268 | .5732 | 1748 | 4695 | 3153 | 1620 | 4950 | 3025 | 405  | 28.39 |
| 10000 | .81  | .45 | .5500 | 2025 | 4950 | 3025 | .4280 | .5720 | 1761 | 4708 | 3146 | 1640 | 4950 | 3025 | 385  | 25.42 |
| 10000 | .82  | .45 | .5500 | 2025 | 4950 | 3025 | .4292 | .5708 | 1775 | 4721 | 3139 | 1661 | 4950 | 3025 | 365  | 22.64 |
| 10000 | .83  | .45 | .5500 | 2025 | 4950 | 3025 | .4304 | .5696 | 1789 | 4734 | 3133 | 1681 | 4950 | 3025 | 344  | 20.04 |
| 10000 | .84  | .45 | .5500 | 2025 | 4950 | 3025 | .4316 | .5684 | 1802 | 4747 | 3126 | 1701 | 4950 | 3025 | 324  | 17.62 |
| 10000 | .85  | .45 | .5500 | 2025 | 4950 | 3025 | .4328 | .5672 | 1816 | 4760 | 3120 | 1721 | 4950 | 3025 | 304  | 15.37 |
| 10000 | .86  | .45 | .5500 | 2025 | 4950 | 3025 | .4340 | .5660 | 1830 | 4773 | 3113 | 1742 | 4950 | 3025 | 284  | 13.29 |
| 10000 | .87  | .45 | .5500 | 2025 | 4950 | 3025 | .4351 | .5649 | 1844 | 4786 | 3107 | 1762 | 4950 | 3025 | 263  | 11.37 |
| 10000 | .88  | .45 | .5500 | 2025 | 4950 | 3025 | .4363 | .5637 | 1857 | 4799 | 3100 | 1782 | 4950 | 3025 | 243  | 9.62  |
| 10000 | .89  | .45 | .5500 | 2025 | 4950 | 3025 | .4375 | .5625 | 1871 | 4812 | 3094 | 1802 | 4950 | 3025 | 223  | 8.02  |
| 10000 | .90  | .45 | .5500 | 2025 | 4950 | 3025 | .4386 | .5614 | 1885 | 4825 | 3088 | 1823 | 4950 | 3025 | 203  | 6.58  |
| 10000 | .91  | .45 | .5500 | 2025 | 4950 | 3025 | .4398 | .5602 | 1899 | 4838 | 3081 | 1843 | 4950 | 3025 | 182  | 5.29  |
| 10000 | .92  | .45 | .5500 | 2025 | 4950 | 3025 | .4409 | .5591 | 1913 | 4850 | 3075 | 1863 | 4950 | 3025 | 162  | 4.15  |
| 10000 | .93  | .45 | .5500 | 2025 | 4950 | 3025 | .4421 | .5579 | 1927 | 4863 | 3068 | 1883 | 4950 | 3025 | 142  | 3.15  |
| 10000 | .94  | .45 | .5500 | 2025 | 4950 | 3025 | .4432 | .5568 | 1941 | 4876 | 3062 | 1904 | 4950 | 3025 | 122  | 2.30  |
| 10000 | .95  | .45 | .5500 | 2025 | 4950 | 3025 | .4444 | .5556 | 1955 | 4888 | 3056 | 1924 | 4950 | 3025 | 101  | 1.59  |
| 10000 | .96  | .45 | .5500 | 2025 | 4950 | 3025 | .4455 | .5545 | 1969 | 4901 | 3050 | 1944 | 4950 | 3025 | 81   | 1.01  |
| 10000 | .97  | .45 | .5500 | 2025 | 4950 | 3025 | .4466 | .5534 | 1983 | 4913 | 3043 | 1964 | 4950 | 3025 | 61   | .56   |
| 10000 | .98  | .45 | .5500 | 2025 | 4950 | 3025 | .4478 | .5522 | 1997 | 4925 | 3037 | 1985 | 4950 | 3025 | 41   | .25   |
| 10000 | .99  | .45 | .5500 | 2025 | 4950 | 3025 | .4489 | .5511 | 2011 | 4938 | 3031 | 2005 | 4950 | 3025 | 20   | .06   |
| 10000 | 1.00 | .45 | .5500 | 2025 | 4950 | 3025 | .4500 | .5500 | 2025 | 4950 | 3025 | 2025 | 4950 | 3025 | 0    | .00   |
| 10000 | 1.01 | .45 | .5500 | 2025 | 4950 | 3025 | .4511 | .5489 | 2039 | 4962 | 3019 | 2045 | 4950 | 3025 | -20  | .06   |
| 10000 | 1.02 | .45 | .5500 | 2025 | 4950 | 3025 | .4522 | .5478 | 2053 | 4974 | 3013 | 2066 | 4950 | 3025 | -41  | .24   |
| 10000 | 1.03 | .45 | .5500 | 2025 | 4950 | 3025 | .4533 | .5467 | 2067 | 4987 | 3007 | 2086 | 4950 | 3025 | -61  | .54   |
| 10000 | 1.04 | .45 | .5500 | 2025 | 4950 | 3025 | .4544 | .5456 | 2082 | 4999 | 3001 | 2106 | 4950 | 3025 | -81  | .95   |
| 10000 | 1.05 | .45 | .5500 | 2025 | 4950 | 3025 | .4555 | .5445 | 2096 | 5011 | 2995 | 2126 | 4950 | 3025 | -101 | 1.48  |

|       |      |     |       |      |      |      |       |       |      |      |      |      |      |      |      |       |
|-------|------|-----|-------|------|------|------|-------|-------|------|------|------|------|------|------|------|-------|
| 10000 | 1.06 | .45 | .5500 | 2025 | 4950 | 3025 | .4566 | .5434 | 2110 | 5023 | 2989 | 2147 | 4950 | 3025 | -122 | 2.12  |
| 10000 | 1.07 | .45 | .5500 | 2025 | 4950 | 3025 | .4577 | .5423 | 2124 | 5035 | 2983 | 2167 | 4950 | 3025 | -142 | 2.86  |
| 10000 | 1.08 | .45 | .5500 | 2025 | 4950 | 3025 | .4588 | .5412 | 2139 | 5046 | 2977 | 2187 | 4950 | 3025 | -162 | 3.71  |
| 10000 | 1.09 | .45 | .5500 | 2025 | 4950 | 3025 | .4598 | .5402 | 2153 | 5058 | 2971 | 2207 | 4950 | 3025 | -182 | 4.67  |
| 10000 | 1.10 | .45 | .5500 | 2025 | 4950 | 3025 | .4609 | .5391 | 2167 | 5070 | 2965 | 2228 | 4950 | 3025 | -203 | 5.72  |
| 10000 | 1.11 | .45 | .5500 | 2025 | 4950 | 3025 | .4620 | .5380 | 2182 | 5082 | 2959 | 2248 | 4950 | 3025 | -223 | 6.88  |
| 10000 | 1.12 | .45 | .5500 | 2025 | 4950 | 3025 | .4630 | .5370 | 2196 | 5094 | 2953 | 2268 | 4950 | 3025 | -243 | 8.13  |
| 10000 | 1.13 | .45 | .5500 | 2025 | 4950 | 3025 | .4641 | .5359 | 2211 | 5105 | 2947 | 2288 | 4950 | 3025 | -263 | 9.48  |
| 10000 | 1.14 | .45 | .5500 | 2025 | 4950 | 3025 | .4652 | .5348 | 2225 | 5117 | 2942 | 2309 | 4950 | 3025 | -284 | 10.93 |
| 10000 | 1.15 | .45 | .5500 | 2025 | 4950 | 3025 | .4662 | .5338 | 2240 | 5128 | 2936 | 2329 | 4950 | 3025 | -304 | 12.46 |
| 10000 | 1.16 | .45 | .5500 | 2025 | 4950 | 3025 | .4673 | .5327 | 2254 | 5140 | 2930 | 2349 | 4950 | 3025 | -324 | 14.09 |
| 10000 | 1.17 | .45 | .5500 | 2025 | 4950 | 3025 | .4683 | .5317 | 2269 | 5151 | 2924 | 2369 | 4950 | 3025 | -344 | 15.80 |
| 10000 | 1.18 | .45 | .5500 | 2025 | 4950 | 3025 | .4693 | .5307 | 2283 | 5163 | 2919 | 2390 | 4950 | 3025 | -365 | 17.60 |
| 10000 | 1.19 | .45 | .5500 | 2025 | 4950 | 3025 | .4704 | .5296 | 2298 | 5174 | 2913 | 2410 | 4950 | 3025 | -385 | 19.49 |
| 10000 | 1.20 | .45 | .5500 | 2025 | 4950 | 3025 | .4714 | .5286 | 2312 | 5185 | 2907 | 2430 | 4950 | 3025 | -405 | 21.46 |
| 10000 | .80  | .50 | .5000 | 2500 | 5000 | 2500 | .4737 | .5263 | 2132 | 4737 | 2632 | 2000 | 5000 | 2500 | 500  | 29.32 |
| 10000 | .81  | .50 | .5000 | 2500 | 5000 | 2500 | .4751 | .5249 | 2150 | 4751 | 2625 | 2025 | 5000 | 2500 | 475  | 26.24 |
| 10000 | .82  | .50 | .5000 | 2500 | 5000 | 2500 | .4764 | .5236 | 2168 | 4764 | 2618 | 2050 | 5000 | 2500 | 450  | 23.35 |
| 10000 | .83  | .50 | .5000 | 2500 | 5000 | 2500 | .4778 | .5222 | 2186 | 4778 | 2611 | 2075 | 5000 | 2500 | 425  | 20.66 |
| 10000 | .84  | .50 | .5000 | 2500 | 5000 | 2500 | .4792 | .5208 | 2204 | 4792 | 2604 | 2100 | 5000 | 2500 | 400  | 18.15 |
| 10000 | .85  | .50 | .5000 | 2500 | 5000 | 2500 | .4805 | .5195 | 2222 | 4805 | 2597 | 2125 | 5000 | 2500 | 375  | 15.82 |
| 10000 | .86  | .50 | .5000 | 2500 | 5000 | 2500 | .4819 | .5181 | 2241 | 4819 | 2591 | 2150 | 5000 | 2500 | 350  | 13.67 |
| 10000 | .87  | .50 | .5000 | 2500 | 5000 | 2500 | .4832 | .5168 | 2259 | 4832 | 2584 | 2175 | 5000 | 2500 | 325  | 11.69 |
| 10000 | .88  | .50 | .5000 | 2500 | 5000 | 2500 | .4845 | .5155 | 2277 | 4845 | 2577 | 2200 | 5000 | 2500 | 300  | 9.88  |
| 10000 | .89  | .50 | .5000 | 2500 | 5000 | 2500 | .4859 | .5141 | 2296 | 4859 | 2571 | 2225 | 5000 | 2500 | 275  | 8.24  |
| 10000 | .90  | .50 | .5000 | 2500 | 5000 | 2500 | .4872 | .5128 | 2314 | 4872 | 2564 | 2250 | 5000 | 2500 | 250  | 6.75  |
| 10000 | .91  | .50 | .5000 | 2500 | 5000 | 2500 | .4885 | .5115 | 2333 | 4885 | 2558 | 2275 | 5000 | 2500 | 225  | 5.43  |
| 10000 | .92  | .50 | .5000 | 2500 | 5000 | 2500 | .4898 | .5102 | 2351 | 4898 | 2551 | 2300 | 5000 | 2500 | 200  | 4.25  |
| 10000 | .93  | .50 | .5000 | 2500 | 5000 | 2500 | .4911 | .5089 | 2370 | 4911 | 2545 | 2325 | 5000 | 2500 | 175  | 3.23  |
| 10000 | .94  | .50 | .5000 | 2500 | 5000 | 2500 | .4924 | .5076 | 2388 | 4924 | 2538 | 2350 | 5000 | 2500 | 150  | 2.36  |
| 10000 | .95  | .50 | .5000 | 2500 | 5000 | 2500 | .4937 | .5063 | 2407 | 4937 | 2532 | 2375 | 5000 | 2500 | 125  | 1.62  |
| 10000 | .96  | .50 | .5000 | 2500 | 5000 | 2500 | .4949 | .5051 | 2425 | 4949 | 2525 | 2400 | 5000 | 2500 | 100  | 1.03  |
| 10000 | .97  | .50 | .5000 | 2500 | 5000 | 2500 | .4962 | .5038 | 2444 | 4962 | 2519 | 2425 | 5000 | 2500 | 75   | .58   |

|       |      |     |       |      |      |      |       |       |      |      |      |      |      |      |      |       |
|-------|------|-----|-------|------|------|------|-------|-------|------|------|------|------|------|------|------|-------|
| 10000 | .98  | .50 | .5000 | 2500 | 5000 | 2500 | .4975 | .5025 | 2463 | 4975 | 2513 | 2450 | 5000 | 2500 | 50   | .25   |
| 10000 | .99  | .50 | .5000 | 2500 | 5000 | 2500 | .4987 | .5013 | 2481 | 4987 | 2506 | 2475 | 5000 | 2500 | 25   | .06   |
| 10000 | 1.00 | .50 | .5000 | 2500 | 5000 | 2500 | .5000 | .5000 | 2500 | 5000 | 2500 | 2500 | 5000 | 2500 | 0    | .00   |
| 10000 | 1.01 | .50 | .5000 | 2500 | 5000 | 2500 | .5012 | .4988 | 2519 | 5012 | 2494 | 2525 | 5000 | 2500 | -25  | .06   |
| 10000 | 1.02 | .50 | .5000 | 2500 | 5000 | 2500 | .5025 | .4975 | 2538 | 5025 | 2488 | 2550 | 5000 | 2500 | -50  | .25   |
| 10000 | 1.03 | .50 | .5000 | 2500 | 5000 | 2500 | .5037 | .4963 | 2556 | 5037 | 2481 | 2575 | 5000 | 2500 | -75  | .55   |
| 10000 | 1.04 | .50 | .5000 | 2500 | 5000 | 2500 | .5050 | .4950 | 2575 | 5050 | 2475 | 2600 | 5000 | 2500 | -100 | .97   |
| 10000 | 1.05 | .50 | .5000 | 2500 | 5000 | 2500 | .5062 | .4938 | 2594 | 5062 | 2469 | 2625 | 5000 | 2500 | -125 | 1.51  |
| 10000 | 1.06 | .50 | .5000 | 2500 | 5000 | 2500 | .5074 | .4926 | 2613 | 5074 | 2463 | 2650 | 5000 | 2500 | -150 | 2.15  |
| 10000 | 1.07 | .50 | .5000 | 2500 | 5000 | 2500 | .5086 | .4914 | 2632 | 5086 | 2457 | 2675 | 5000 | 2500 | -175 | 2.91  |
| 10000 | 1.08 | .50 | .5000 | 2500 | 5000 | 2500 | .5098 | .4902 | 2651 | 5098 | 2451 | 2700 | 5000 | 2500 | -200 | 3.77  |
| 10000 | 1.09 | .50 | .5000 | 2500 | 5000 | 2500 | .5110 | .4890 | 2670 | 5110 | 2445 | 2725 | 5000 | 2500 | -225 | 4.74  |
| 10000 | 1.10 | .50 | .5000 | 2500 | 5000 | 2500 | .5122 | .4878 | 2689 | 5122 | 2439 | 2750 | 5000 | 2500 | -250 | 5.81  |
| 10000 | 1.11 | .50 | .5000 | 2500 | 5000 | 2500 | .5134 | .4866 | 2708 | 5134 | 2433 | 2775 | 5000 | 2500 | -275 | 6.98  |
| 10000 | 1.12 | .50 | .5000 | 2500 | 5000 | 2500 | .5146 | .4854 | 2727 | 5146 | 2427 | 2800 | 5000 | 2500 | -300 | 8.25  |
| 10000 | 1.13 | .50 | .5000 | 2500 | 5000 | 2500 | .5157 | .4843 | 2746 | 5157 | 2421 | 2825 | 5000 | 2500 | -325 | 9.62  |
| 10000 | 1.14 | .50 | .5000 | 2500 | 5000 | 2500 | .5169 | .4831 | 2765 | 5169 | 2415 | 2850 | 5000 | 2500 | -350 | 11.07 |
| 10000 | 1.15 | .50 | .5000 | 2500 | 5000 | 2500 | .5181 | .4819 | 2785 | 5181 | 2410 | 2875 | 5000 | 2500 | -375 | 12.63 |
| 10000 | 1.16 | .50 | .5000 | 2500 | 5000 | 2500 | .5192 | .4808 | 2804 | 5192 | 2404 | 2900 | 5000 | 2500 | -400 | 14.27 |
| 10000 | 1.17 | .50 | .5000 | 2500 | 5000 | 2500 | .5204 | .4796 | 2823 | 5204 | 2398 | 2925 | 5000 | 2500 | -425 | 16.00 |
| 10000 | 1.18 | .50 | .5000 | 2500 | 5000 | 2500 | .5215 | .4785 | 2842 | 5215 | 2392 | 2950 | 5000 | 2500 | -450 | 17.81 |
| 10000 | 1.19 | .50 | .5000 | 2500 | 5000 | 2500 | .5227 | .4773 | 2862 | 5227 | 2387 | 2975 | 5000 | 2500 | -475 | 19.71 |
| 10000 | 1.20 | .50 | .5000 | 2500 | 5000 | 2500 | .5238 | .4762 | 2881 | 5238 | 2381 | 3000 | 5000 | 2500 | -500 | 21.69 |
| 10000 | .80  | .55 | .4500 | 3025 | 4950 | 2025 | .5210 | .4790 | 2550 | 4689 | 2155 | 2420 | 4950 | 2025 | 605  | 29.06 |
| 10000 | .81  | .55 | .4500 | 3025 | 4950 | 2025 | .5226 | .4774 | 2574 | 4703 | 2148 | 2450 | 4950 | 2025 | 575  | 25.99 |
| 10000 | .82  | .55 | .4500 | 3025 | 4950 | 2025 | .5241 | .4759 | 2597 | 4717 | 2142 | 2481 | 4950 | 2025 | 545  | 23.12 |
| 10000 | .83  | .55 | .4500 | 3025 | 4950 | 2025 | .5256 | .4744 | 2621 | 4730 | 2135 | 2511 | 4950 | 2025 | 514  | 20.44 |
| 10000 | .84  | .55 | .4500 | 3025 | 4950 | 2025 | .5271 | .4729 | 2644 | 4744 | 2128 | 2541 | 4950 | 2025 | 484  | 17.94 |
| 10000 | .85  | .55 | .4500 | 3025 | 4950 | 2025 | .5286 | .4714 | 2668 | 4757 | 2121 | 2571 | 4950 | 2025 | 454  | 15.63 |
| 10000 | .86  | .55 | .4500 | 3025 | 4950 | 2025 | .5301 | .4699 | 2691 | 4771 | 2115 | 2602 | 4950 | 2025 | 424  | 13.50 |
| 10000 | .87  | .55 | .4500 | 3025 | 4950 | 2025 | .5316 | .4684 | 2715 | 4784 | 2108 | 2632 | 4950 | 2025 | 393  | 11.54 |
| 10000 | .88  | .55 | .4500 | 3025 | 4950 | 2025 | .5330 | .4670 | 2738 | 4797 | 2101 | 2662 | 4950 | 2025 | 363  | 9.74  |
| 10000 | .89  | .55 | .4500 | 3025 | 4950 | 2025 | .5345 | .4655 | 2762 | 4811 | 2095 | 2692 | 4950 | 2025 | 333  | 8.12  |

|       |      |     |       |      |      |      |       |       |      |      |      |      |      |      |      |       |
|-------|------|-----|-------|------|------|------|-------|-------|------|------|------|------|------|------|------|-------|
| 10000 | .90  | .55 | .4500 | 3025 | 4950 | 2025 | .5360 | .4640 | 2786 | 4824 | 2088 | 2723 | 4950 | 2025 | 303  | 6.65  |
| 10000 | .91  | .55 | .4500 | 3025 | 4950 | 2025 | .5374 | .4626 | 2809 | 4837 | 2082 | 2753 | 4950 | 2025 | 272  | 5.34  |
| 10000 | .92  | .55 | .4500 | 3025 | 4950 | 2025 | .5388 | .4612 | 2833 | 4850 | 2075 | 2783 | 4950 | 2025 | 242  | 4.19  |
| 10000 | .93  | .55 | .4500 | 3025 | 4950 | 2025 | .5403 | .4597 | 2857 | 4862 | 2069 | 2813 | 4950 | 2025 | 212  | 3.18  |
| 10000 | .94  | .55 | .4500 | 3025 | 4950 | 2025 | .5417 | .4583 | 2881 | 4875 | 2062 | 2844 | 4950 | 2025 | 182  | 2.32  |
| 10000 | .95  | .55 | .4500 | 3025 | 4950 | 2025 | .5431 | .4569 | 2905 | 4888 | 2056 | 2874 | 4950 | 2025 | 151  | 1.59  |
| 10000 | .96  | .55 | .4500 | 3025 | 4950 | 2025 | .5445 | .4555 | 2929 | 4900 | 2050 | 2904 | 4950 | 2025 | 121  | 1.01  |
| 10000 | .97  | .55 | .4500 | 3025 | 4950 | 2025 | .5459 | .4541 | 2953 | 4913 | 2044 | 2934 | 4950 | 2025 | 91   | .56   |
| 10000 | .98  | .55 | .4500 | 3025 | 4950 | 2025 | .5473 | .4527 | 2977 | 4925 | 2037 | 2965 | 4950 | 2025 | 61   | .25   |
| 10000 | .99  | .55 | .4500 | 3025 | 4950 | 2025 | .5486 | .4514 | 3001 | 4938 | 2031 | 2995 | 4950 | 2025 | 30   | .06   |
| 10000 | 1.00 | .55 | .4500 | 3025 | 4950 | 2025 | .5500 | .4500 | 3025 | 4950 | 2025 | 3025 | 4950 | 2025 | 0    | .00   |
| 10000 | 1.01 | .55 | .4500 | 3025 | 4950 | 2025 | .5514 | .4486 | 3049 | 4962 | 2019 | 3055 | 4950 | 2025 | -30  | .06   |
| 10000 | 1.02 | .55 | .4500 | 3025 | 4950 | 2025 | .5527 | .4473 | 3073 | 4974 | 2013 | 3086 | 4950 | 2025 | -61  | .24   |
| 10000 | 1.03 | .55 | .4500 | 3025 | 4950 | 2025 | .5540 | .4460 | 3098 | 4986 | 2007 | 3116 | 4950 | 2025 | -91  | .54   |
| 10000 | 1.04 | .55 | .4500 | 3025 | 4950 | 2025 | .5554 | .4446 | 3122 | 4998 | 2001 | 3146 | 4950 | 2025 | -121 | .95   |
| 10000 | 1.05 | .55 | .4500 | 3025 | 4950 | 2025 | .5567 | .4433 | 3146 | 5010 | 1995 | 3176 | 4950 | 2025 | -151 | 1.47  |
| 10000 | 1.06 | .55 | .4500 | 3025 | 4950 | 2025 | .5580 | .4420 | 3170 | 5022 | 1989 | 3207 | 4950 | 2025 | -182 | 2.10  |
| 10000 | 1.07 | .55 | .4500 | 3025 | 4950 | 2025 | .5593 | .4407 | 3195 | 5034 | 1983 | 3237 | 4950 | 2025 | -212 | 2.84  |
| 10000 | 1.08 | .55 | .4500 | 3025 | 4950 | 2025 | .5606 | .4394 | 3219 | 5046 | 1977 | 3267 | 4950 | 2025 | -242 | 3.68  |
| 10000 | 1.09 | .55 | .4500 | 3025 | 4950 | 2025 | .5619 | .4381 | 3244 | 5057 | 1971 | 3297 | 4950 | 2025 | -272 | 4.63  |
| 10000 | 1.10 | .55 | .4500 | 3025 | 4950 | 2025 | .5632 | .4368 | 3268 | 5069 | 1966 | 3328 | 4950 | 2025 | -303 | 5.67  |
| 10000 | 1.11 | .55 | .4500 | 3025 | 4950 | 2025 | .5645 | .4355 | 3293 | 5080 | 1960 | 3358 | 4950 | 2025 | -333 | 6.81  |
| 10000 | 1.12 | .55 | .4500 | 3025 | 4950 | 2025 | .5658 | .4342 | 3317 | 5092 | 1954 | 3388 | 4950 | 2025 | -363 | 8.04  |
| 10000 | 1.13 | .55 | .4500 | 3025 | 4950 | 2025 | .5670 | .4330 | 3342 | 5103 | 1948 | 3418 | 4950 | 2025 | -393 | 9.37  |
| 10000 | 1.14 | .55 | .4500 | 3025 | 4950 | 2025 | .5683 | .4317 | 3366 | 5115 | 1943 | 3449 | 4950 | 2025 | -424 | 10.79 |
| 10000 | 1.15 | .55 | .4500 | 3025 | 4950 | 2025 | .5695 | .4305 | 3391 | 5126 | 1937 | 3479 | 4950 | 2025 | -454 | 12.30 |
| 10000 | 1.16 | .55 | .4500 | 3025 | 4950 | 2025 | .5708 | .4292 | 3416 | 5137 | 1932 | 3509 | 4950 | 2025 | -484 | 13.89 |
| 10000 | 1.17 | .55 | .4500 | 3025 | 4950 | 2025 | .5720 | .4280 | 3440 | 5148 | 1926 | 3539 | 4950 | 2025 | -514 | 15.57 |
| 10000 | 1.18 | .55 | .4500 | 3025 | 4950 | 2025 | .5732 | .4268 | 3465 | 5159 | 1920 | 3570 | 4950 | 2025 | -545 | 17.33 |
| 10000 | 1.19 | .55 | .4500 | 3025 | 4950 | 2025 | .5745 | .4255 | 3490 | 5170 | 1915 | 3600 | 4950 | 2025 | -575 | 19.17 |
| 10000 | 1.20 | .55 | .4500 | 3025 | 4950 | 2025 | .5757 | .4243 | 3514 | 5181 | 1909 | 3630 | 4950 | 2025 | -605 | 21.09 |
| 10000 | .80  | .60 | .4000 | 3600 | 4800 | 1600 | .5690 | .4310 | 3004 | 4552 | 1724 | 2880 | 4800 | 1600 | 720  | 27.61 |
| 10000 | .81  | .60 | .4000 | 3600 | 4800 | 1600 | .5706 | .4294 | 3033 | 4565 | 1717 | 2916 | 4800 | 1600 | 684  | 24.68 |



|       |      |     |       |      |      |      |       |       |      |      |      |      |      |      |      |       |
|-------|------|-----|-------|------|------|------|-------|-------|------|------|------|------|------|------|------|-------|
| 10000 | .82  | .60 | .4000 | 3600 | 4800 | 1600 | .5723 | .4277 | 3063 | 4578 | 1711 | 2952 | 4800 | 1600 | 648  | 21.94 |
| 10000 | .83  | .60 | .4000 | 3600 | 4800 | 1600 | .5739 | .4261 | 3092 | 4591 | 1704 | 2988 | 4800 | 1600 | 612  | 19.38 |
| 10000 | .84  | .60 | .4000 | 3600 | 4800 | 1600 | .5756 | .4244 | 3122 | 4604 | 1698 | 3024 | 4800 | 1600 | 576  | 17.00 |
| 10000 | .85  | .60 | .4000 | 3600 | 4800 | 1600 | .5772 | .4228 | 3151 | 4617 | 1691 | 3060 | 4800 | 1600 | 540  | 14.81 |
| 10000 | .86  | .60 | .4000 | 3600 | 4800 | 1600 | .5788 | .4212 | 3181 | 4630 | 1685 | 3096 | 4800 | 1600 | 504  | 12.78 |
| 10000 | .87  | .60 | .4000 | 3600 | 4800 | 1600 | .5804 | .4196 | 3211 | 4643 | 1679 | 3132 | 4800 | 1600 | 468  | 10.92 |
| 10000 | .88  | .60 | .4000 | 3600 | 4800 | 1600 | .5819 | .4181 | 3240 | 4656 | 1672 | 3168 | 4800 | 1600 | 432  | 9.22  |
| 10000 | .89  | .60 | .4000 | 3600 | 4800 | 1600 | .5835 | .4165 | 3270 | 4668 | 1666 | 3204 | 4800 | 1600 | 396  | 7.67  |
| 10000 | .90  | .60 | .4000 | 3600 | 4800 | 1600 | .5851 | .4149 | 3300 | 4680 | 1660 | 3240 | 4800 | 1600 | 360  | 6.28  |
| 10000 | .91  | .60 | .4000 | 3600 | 4800 | 1600 | .5866 | .4134 | 3330 | 4693 | 1654 | 3276 | 4800 | 1600 | 324  | 5.04  |
| 10000 | .92  | .60 | .4000 | 3600 | 4800 | 1600 | .5881 | .4119 | 3359 | 4705 | 1647 | 3312 | 4800 | 1600 | 288  | 3.95  |
| 10000 | .93  | .60 | .4000 | 3600 | 4800 | 1600 | .5897 | .4103 | 3389 | 4717 | 1641 | 3348 | 4800 | 1600 | 252  | 3.00  |
| 10000 | .94  | .60 | .4000 | 3600 | 4800 | 1600 | .5912 | .4088 | 3419 | 4729 | 1635 | 3384 | 4800 | 1600 | 216  | 2.18  |
| 10000 | .95  | .60 | .4000 | 3600 | 4800 | 1600 | .5927 | .4073 | 3449 | 4741 | 1629 | 3420 | 4800 | 1600 | 180  | 1.50  |
| 10000 | .96  | .60 | .4000 | 3600 | 4800 | 1600 | .5942 | .4058 | 3479 | 4753 | 1623 | 3456 | 4800 | 1600 | 144  | .95   |
| 10000 | .97  | .60 | .4000 | 3600 | 4800 | 1600 | .5956 | .4044 | 3509 | 4765 | 1617 | 3492 | 4800 | 1600 | 108  | .53   |
| 10000 | .98  | .60 | .4000 | 3600 | 4800 | 1600 | .5971 | .4029 | 3540 | 4777 | 1612 | 3528 | 4800 | 1600 | 72   | .23   |
| 10000 | .99  | .60 | .4000 | 3600 | 4800 | 1600 | .5986 | .4014 | 3570 | 4788 | 1606 | 3564 | 4800 | 1600 | 36   | .06   |
| 10000 | 1.00 | .60 | .4000 | 3600 | 4800 | 1600 | .6000 | .4000 | 3600 | 4800 | 1600 | 3600 | 4800 | 1600 | 0    | .00   |
| 10000 | 1.01 | .60 | .4000 | 3600 | 4800 | 1600 | .6014 | .3986 | 3630 | 4811 | 1594 | 3636 | 4800 | 1600 | -36  | .06   |
| 10000 | 1.02 | .60 | .4000 | 3600 | 4800 | 1600 | .6029 | .3971 | 3661 | 4823 | 1589 | 3672 | 4800 | 1600 | -72  | .23   |
| 10000 | 1.03 | .60 | .4000 | 3600 | 4800 | 1600 | .6043 | .3957 | 3691 | 4834 | 1583 | 3708 | 4800 | 1600 | -108 | .51   |
| 10000 | 1.04 | .60 | .4000 | 3600 | 4800 | 1600 | .6057 | .3943 | 3721 | 4845 | 1577 | 3744 | 4800 | 1600 | -144 | .89   |
| 10000 | 1.05 | .60 | .4000 | 3600 | 4800 | 1600 | .6071 | .3929 | 3752 | 4857 | 1572 | 3780 | 4800 | 1600 | -180 | 1.38  |
| 10000 | 1.06 | .60 | .4000 | 3600 | 4800 | 1600 | .6085 | .3915 | 3782 | 4868 | 1566 | 3816 | 4800 | 1600 | -216 | 1.97  |
| 10000 | 1.07 | .60 | .4000 | 3600 | 4800 | 1600 | .6098 | .3902 | 3813 | 4879 | 1561 | 3852 | 4800 | 1600 | -252 | 2.66  |
| 10000 | 1.08 | .60 | .4000 | 3600 | 4800 | 1600 | .6112 | .3888 | 3843 | 4890 | 1555 | 3888 | 4800 | 1600 | -288 | 3.45  |
| 10000 | 1.09 | .60 | .4000 | 3600 | 4800 | 1600 | .6126 | .3874 | 3874 | 4900 | 1550 | 3924 | 4800 | 1600 | -324 | 4.34  |
| 10000 | 1.10 | .60 | .4000 | 3600 | 4800 | 1600 | .6139 | .3861 | 3904 | 4911 | 1544 | 3960 | 4800 | 1600 | -360 | 5.31  |
| 10000 | 1.11 | .60 | .4000 | 3600 | 4800 | 1600 | .6152 | .3848 | 3935 | 4922 | 1539 | 3996 | 4800 | 1600 | -396 | 6.38  |
| 10000 | 1.12 | .60 | .4000 | 3600 | 4800 | 1600 | .6166 | .3834 | 3966 | 4933 | 1534 | 4032 | 4800 | 1600 | -432 | 7.53  |
| 10000 | 1.13 | .60 | .4000 | 3600 | 4800 | 1600 | .6179 | .3821 | 3996 | 4943 | 1528 | 4068 | 4800 | 1600 | -468 | 8.77  |
| 10000 | 1.14 | .60 | .4000 | 3600 | 4800 | 1600 | .6192 | .3808 | 4027 | 4954 | 1523 | 4104 | 4800 | 1600 | -504 | 10.09 |

|       |      |     |       |      |      |      |       |       |      |      |      |      |      |      |      |       |
|-------|------|-----|-------|------|------|------|-------|-------|------|------|------|------|------|------|------|-------|
| 10000 | 1.15 | .60 | .4000 | 3600 | 4800 | 1600 | .6205 | .3795 | 4058 | 4964 | 1518 | 4140 | 4800 | 1600 | -540 | 11.50 |
| 10000 | 1.16 | .60 | .4000 | 3600 | 4800 | 1600 | .6218 | .3782 | 4089 | 4974 | 1513 | 4176 | 4800 | 1600 | -576 | 12.98 |
| 10000 | 1.17 | .60 | .4000 | 3600 | 4800 | 1600 | .6231 | .3769 | 4120 | 4985 | 1508 | 4212 | 4800 | 1600 | -612 | 14.55 |
| 10000 | 1.18 | .60 | .4000 | 3600 | 4800 | 1600 | .6243 | .3757 | 4151 | 4995 | 1503 | 4248 | 4800 | 1600 | -648 | 16.19 |
| 10000 | 1.19 | .60 | .4000 | 3600 | 4800 | 1600 | .6256 | .3744 | 4182 | 5005 | 1498 | 4284 | 4800 | 1600 | -684 | 17.90 |
| 10000 | 1.20 | .60 | .4000 | 3600 | 4800 | 1600 | .6269 | .3731 | 4213 | 5015 | 1493 | 4320 | 4800 | 1600 | -720 | 19.69 |
| 10000 | .80  | .65 | .3500 | 4225 | 4550 | 1225 | .6177 | .3823 | 3493 | 4324 | 1338 | 3380 | 4550 | 1225 | 845  | 25.04 |
| 10000 | .81  | .65 | .3500 | 4225 | 4550 | 1225 | .6195 | .3805 | 3529 | 4336 | 1332 | 3422 | 4550 | 1225 | 803  | 22.37 |
| 10000 | .82  | .65 | .3500 | 4225 | 4550 | 1225 | .6212 | .3788 | 3565 | 4348 | 1326 | 3465 | 4550 | 1225 | 761  | 19.87 |
| 10000 | .83  | .65 | .3500 | 4225 | 4550 | 1225 | .6229 | .3771 | 3602 | 4360 | 1320 | 3507 | 4550 | 1225 | 718  | 17.55 |
| 10000 | .84  | .65 | .3500 | 4225 | 4550 | 1225 | .6246 | .3754 | 3638 | 4372 | 1314 | 3549 | 4550 | 1225 | 676  | 15.39 |
| 10000 | .85  | .65 | .3500 | 4225 | 4550 | 1225 | .6263 | .3737 | 3674 | 4384 | 1308 | 3591 | 4550 | 1225 | 634  | 13.39 |
| 10000 | .86  | .65 | .3500 | 4225 | 4550 | 1225 | .6280 | .3720 | 3711 | 4396 | 1302 | 3634 | 4550 | 1225 | 592  | 11.55 |
| 10000 | .87  | .65 | .3500 | 4225 | 4550 | 1225 | .6297 | .3703 | 3747 | 4408 | 1296 | 3676 | 4550 | 1225 | 549  | 9.86  |
| 10000 | .88  | .65 | .3500 | 4225 | 4550 | 1225 | .6313 | .3687 | 3783 | 4419 | 1290 | 3718 | 4550 | 1225 | 507  | 8.32  |
| 10000 | .89  | .65 | .3500 | 4225 | 4550 | 1225 | .6329 | .3671 | 3820 | 4431 | 1285 | 3760 | 4550 | 1225 | 465  | 6.93  |
| 10000 | .90  | .65 | .3500 | 4225 | 4550 | 1225 | .6346 | .3654 | 3857 | 4442 | 1279 | 3803 | 4550 | 1225 | 423  | 5.67  |
| 10000 | .91  | .65 | .3500 | 4225 | 4550 | 1225 | .6362 | .3638 | 3893 | 4453 | 1273 | 3845 | 4550 | 1225 | 380  | 4.55  |
| 10000 | .92  | .65 | .3500 | 4225 | 4550 | 1225 | .6378 | .3622 | 3930 | 4464 | 1268 | 3887 | 4550 | 1225 | 338  | 3.56  |
| 10000 | .93  | .65 | .3500 | 4225 | 4550 | 1225 | .6393 | .3607 | 3967 | 4475 | 1262 | 3929 | 4550 | 1225 | 296  | 2.70  |
| 10000 | .94  | .65 | .3500 | 4225 | 4550 | 1225 | .6409 | .3591 | 4003 | 4486 | 1257 | 3972 | 4550 | 1225 | 254  | 1.97  |
| 10000 | .95  | .65 | .3500 | 4225 | 4550 | 1225 | .6424 | .3576 | 4040 | 4497 | 1251 | 4014 | 4550 | 1225 | 211  | 1.35  |
| 10000 | .96  | .65 | .3500 | 4225 | 4550 | 1225 | .6440 | .3560 | 4077 | 4508 | 1246 | 4056 | 4550 | 1225 | 169  | .86   |
| 10000 | .97  | .65 | .3500 | 4225 | 4550 | 1225 | .6455 | .3545 | 4114 | 4519 | 1241 | 4098 | 4550 | 1225 | 127  | .48   |
| 10000 | .98  | .65 | .3500 | 4225 | 4550 | 1225 | .6470 | .3530 | 4151 | 4529 | 1235 | 4141 | 4550 | 1225 | 85   | .21   |
| 10000 | .99  | .65 | .3500 | 4225 | 4550 | 1225 | .6485 | .3515 | 4188 | 4540 | 1230 | 4183 | 4550 | 1225 | 42   | .05   |
| 10000 | 1.00 | .65 | .3500 | 4225 | 4550 | 1225 | .6500 | .3500 | 4225 | 4550 | 1225 | 4225 | 4550 | 1225 | 0    | .00   |
| 10000 | 1.01 | .65 | .3500 | 4225 | 4550 | 1225 | .6515 | .3485 | 4262 | 4560 | 1220 | 4267 | 4550 | 1225 | -42  | .05   |
| 10000 | 1.02 | .65 | .3500 | 4225 | 4550 | 1225 | .6529 | .3471 | 4299 | 4571 | 1215 | 4310 | 4550 | 1225 | -85  | .20   |
| 10000 | 1.03 | .65 | .3500 | 4225 | 4550 | 1225 | .6544 | .3456 | 4336 | 4581 | 1210 | 4352 | 4550 | 1225 | -127 | .45   |
| 10000 | 1.04 | .65 | .3500 | 4225 | 4550 | 1225 | .6558 | .3442 | 4374 | 4591 | 1205 | 4394 | 4550 | 1225 | -169 | .80   |
| 10000 | 1.05 | .65 | .3500 | 4225 | 4550 | 1225 | .6572 | .3428 | 4411 | 4601 | 1200 | 4436 | 4550 | 1225 | -211 | 1.24  |
| 10000 | 1.06 | .65 | .3500 | 4225 | 4550 | 1225 | .6587 | .3413 | 4448 | 4611 | 1195 | 4479 | 4550 | 1225 | -254 | 1.77  |

|       |      |     |       |      |      |      |       |       |      |      |      |      |      |      |      |       |
|-------|------|-----|-------|------|------|------|-------|-------|------|------|------|------|------|------|------|-------|
| 10000 | 1.07 | .65 | .3500 | 4225 | 4550 | 1225 | .6601 | .3399 | 4486 | 4620 | 1190 | 4521 | 4550 | 1225 | -296 | 2.39  |
| 10000 | 1.08 | .65 | .3500 | 4225 | 4550 | 1225 | .6614 | .3386 | 4523 | 4630 | 1185 | 4563 | 4550 | 1225 | -338 | 3.09  |
| 10000 | 1.09 | .65 | .3500 | 4225 | 4550 | 1225 | .6628 | .3372 | 4560 | 4640 | 1180 | 4605 | 4550 | 1225 | -380 | 3.88  |
| 10000 | 1.10 | .65 | .3500 | 4225 | 4550 | 1225 | .6642 | .3358 | 4598 | 4649 | 1175 | 4648 | 4550 | 1225 | -423 | 4.76  |
| 10000 | 1.11 | .65 | .3500 | 4225 | 4550 | 1225 | .6655 | .3345 | 4635 | 4659 | 1171 | 4690 | 4550 | 1225 | -465 | 5.71  |
| 10000 | 1.12 | .65 | .3500 | 4225 | 4550 | 1225 | .6669 | .3331 | 4673 | 4668 | 1166 | 4732 | 4550 | 1225 | -507 | 6.74  |
| 10000 | 1.13 | .65 | .3500 | 4225 | 4550 | 1225 | .6682 | .3318 | 4710 | 4678 | 1161 | 4774 | 4550 | 1225 | -549 | 7.85  |
| 10000 | 1.14 | .65 | .3500 | 4225 | 4550 | 1225 | .6695 | .3305 | 4748 | 4687 | 1157 | 4817 | 4550 | 1225 | -592 | 9.03  |
| 10000 | 1.15 | .65 | .3500 | 4225 | 4550 | 1225 | .6709 | .3291 | 4786 | 4696 | 1152 | 4859 | 4550 | 1225 | -634 | 10.28 |
| 10000 | 1.16 | .65 | .3500 | 4225 | 4550 | 1225 | .6722 | .3278 | 4823 | 4705 | 1147 | 4901 | 4550 | 1225 | -676 | 11.61 |
| 10000 | 1.17 | .65 | .3500 | 4225 | 4550 | 1225 | .6735 | .3265 | 4861 | 4714 | 1143 | 4943 | 4550 | 1225 | -718 | 13.00 |
| 10000 | 1.18 | .65 | .3500 | 4225 | 4550 | 1225 | .6747 | .3253 | 4899 | 4723 | 1138 | 4986 | 4550 | 1225 | -761 | 14.46 |
| 10000 | 1.19 | .65 | .3500 | 4225 | 4550 | 1225 | .6760 | .3240 | 4937 | 4732 | 1134 | 5028 | 4550 | 1225 | -803 | 15.99 |
| 10000 | 1.20 | .65 | .3500 | 4225 | 4550 | 1225 | .6773 | .3227 | 4975 | 4741 | 1130 | 5070 | 4550 | 1225 | -845 | 17.58 |
| 10000 | .80  | .70 | .3000 | 4900 | 4200 | 900  | .6674 | .3326 | 4018 | 4004 | 998  | 3920 | 4200 | 900  | 980  | 21.51 |
| 10000 | .81  | .70 | .3000 | 4900 | 4200 | 900  | .6692 | .3308 | 4061 | 4015 | 992  | 3969 | 4200 | 900  | 931  | 19.21 |
| 10000 | .82  | .70 | .3000 | 4900 | 4200 | 900  | .6710 | .3290 | 4105 | 4026 | 987  | 4018 | 4200 | 900  | 882  | 17.06 |
| 10000 | .83  | .70 | .3000 | 4900 | 4200 | 900  | .6727 | .3273 | 4149 | 4036 | 982  | 4067 | 4200 | 900  | 833  | 15.05 |
| 10000 | .84  | .70 | .3000 | 4900 | 4200 | 900  | .6745 | .3255 | 4193 | 4047 | 977  | 4116 | 4200 | 900  | 784  | 13.19 |
| 10000 | .85  | .70 | .3000 | 4900 | 4200 | 900  | .6762 | .3238 | 4236 | 4057 | 971  | 4165 | 4200 | 900  | 735  | 11.48 |
| 10000 | .86  | .70 | .3000 | 4900 | 4200 | 900  | .6779 | .3221 | 4280 | 4067 | 966  | 4214 | 4200 | 900  | 686  | 9.90  |
| 10000 | .87  | .70 | .3000 | 4900 | 4200 | 900  | .6796 | .3204 | 4324 | 4078 | 961  | 4263 | 4200 | 900  | 637  | 8.45  |
| 10000 | .88  | .70 | .3000 | 4900 | 4200 | 900  | .6813 | .3187 | 4368 | 4088 | 956  | 4312 | 4200 | 900  | 588  | 7.12  |
| 10000 | .89  | .70 | .3000 | 4900 | 4200 | 900  | .6829 | .3171 | 4412 | 4097 | 951  | 4361 | 4200 | 900  | 539  | 5.93  |
| 10000 | .90  | .70 | .3000 | 4900 | 4200 | 900  | .6845 | .3155 | 4456 | 4107 | 946  | 4410 | 4200 | 900  | 490  | 4.85  |
| 10000 | .91  | .70 | .3000 | 4900 | 4200 | 900  | .6862 | .3138 | 4501 | 4117 | 942  | 4459 | 4200 | 900  | 441  | 3.89  |
| 10000 | .92  | .70 | .3000 | 4900 | 4200 | 900  | .6878 | .3122 | 4545 | 4127 | 937  | 4508 | 4200 | 900  | 392  | 3.04  |
| 10000 | .93  | .70 | .3000 | 4900 | 4200 | 900  | .6893 | .3107 | 4589 | 4136 | 932  | 4557 | 4200 | 900  | 343  | 2.31  |
| 10000 | .94  | .70 | .3000 | 4900 | 4200 | 900  | .6909 | .3091 | 4633 | 4145 | 927  | 4606 | 4200 | 900  | 294  | 1.68  |
| 10000 | .95  | .70 | .3000 | 4900 | 4200 | 900  | .6925 | .3075 | 4678 | 4155 | 923  | 4655 | 4200 | 900  | 245  | 1.15  |
| 10000 | .96  | .70 | .3000 | 4900 | 4200 | 900  | .6940 | .3060 | 4722 | 4164 | 918  | 4704 | 4200 | 900  | 196  | .73   |
| 10000 | .97  | .70 | .3000 | 4900 | 4200 | 900  | .6955 | .3045 | 4766 | 4173 | 913  | 4753 | 4200 | 900  | 147  | .41   |
| 10000 | .98  | .70 | .3000 | 4900 | 4200 | 900  | .6970 | .3030 | 4811 | 4182 | 909  | 4802 | 4200 | 900  | 98   | .18   |

|       |      |     |       |      |      |     |       |       |      |      |     |      |      |     |      |       |
|-------|------|-----|-------|------|------|-----|-------|-------|------|------|-----|------|------|-----|------|-------|
| 10000 | .99  | .70 | .3000 | 4900 | 4200 | 900 | .6985 | .3015 | 4855 | 4191 | 904 | 4851 | 4200 | 900 | 49   | .04   |
| 10000 | 1.00 | .70 | .3000 | 4900 | 4200 | 900 | .7000 | .3000 | 4900 | 4200 | 900 | 4900 | 4200 | 900 | 0    | .00   |
| 10000 | 1.01 | .70 | .3000 | 4900 | 4200 | 900 | .7015 | .2985 | 4945 | 4209 | 896 | 4949 | 4200 | 900 | -49  | .04   |
| 10000 | 1.02 | .70 | .3000 | 4900 | 4200 | 900 | .7029 | .2971 | 4989 | 4217 | 891 | 4998 | 4200 | 900 | -98  | .17   |
| 10000 | 1.03 | .70 | .3000 | 4900 | 4200 | 900 | .7043 | .2957 | 5034 | 4226 | 887 | 5047 | 4200 | 900 | -147 | .39   |
| 10000 | 1.04 | .70 | .3000 | 4900 | 4200 | 900 | .7058 | .2942 | 5079 | 4235 | 883 | 5096 | 4200 | 900 | -196 | .68   |
| 10000 | 1.05 | .70 | .3000 | 4900 | 4200 | 900 | .7072 | .2928 | 5123 | 4243 | 878 | 5145 | 4200 | 900 | -245 | 1.05  |
| 10000 | 1.06 | .70 | .3000 | 4900 | 4200 | 900 | .7086 | .2914 | 5168 | 4251 | 874 | 5194 | 4200 | 900 | -294 | 1.51  |
| 10000 | 1.07 | .70 | .3000 | 4900 | 4200 | 900 | .7099 | .2901 | 5213 | 4260 | 870 | 5243 | 4200 | 900 | -343 | 2.03  |
| 10000 | 1.08 | .70 | .3000 | 4900 | 4200 | 900 | .7113 | .2887 | 5258 | 4268 | 866 | 5292 | 4200 | 900 | -392 | 2.63  |
| 10000 | 1.09 | .70 | .3000 | 4900 | 4200 | 900 | .7127 | .2873 | 5303 | 4276 | 862 | 5341 | 4200 | 900 | -441 | 3.30  |
| 10000 | 1.10 | .70 | .3000 | 4900 | 4200 | 900 | .7140 | .2860 | 5348 | 4284 | 858 | 5390 | 4200 | 900 | -490 | 4.04  |
| 10000 | 1.11 | .70 | .3000 | 4900 | 4200 | 900 | .7153 | .2847 | 5393 | 4292 | 854 | 5439 | 4200 | 900 | -539 | 4.85  |
| 10000 | 1.12 | .70 | .3000 | 4900 | 4200 | 900 | .7167 | .2833 | 5438 | 4300 | 850 | 5488 | 4200 | 900 | -588 | 5.72  |
| 10000 | 1.13 | .70 | .3000 | 4900 | 4200 | 900 | .7180 | .2820 | 5483 | 4308 | 846 | 5537 | 4200 | 900 | -637 | 6.66  |
| 10000 | 1.14 | .70 | .3000 | 4900 | 4200 | 900 | .7193 | .2807 | 5528 | 4316 | 842 | 5586 | 4200 | 900 | -686 | 7.66  |
| 10000 | 1.15 | .70 | .3000 | 4900 | 4200 | 900 | .7205 | .2795 | 5573 | 4323 | 838 | 5635 | 4200 | 900 | -735 | 8.72  |
| 10000 | 1.16 | .70 | .3000 | 4900 | 4200 | 900 | .7218 | .2782 | 5619 | 4331 | 835 | 5684 | 4200 | 900 | -784 | 9.85  |
| 10000 | 1.17 | .70 | .3000 | 4900 | 4200 | 900 | .7231 | .2769 | 5664 | 4338 | 831 | 5733 | 4200 | 900 | -833 | 11.03 |
| 10000 | 1.18 | .70 | .3000 | 4900 | 4200 | 900 | .7243 | .2757 | 5709 | 4346 | 827 | 5782 | 4200 | 900 | -882 | 12.26 |
| 10000 | 1.19 | .70 | .3000 | 4900 | 4200 | 900 | .7256 | .2744 | 5754 | 4353 | 823 | 5831 | 4200 | 900 | -931 | 13.56 |
| 10000 | 1.20 | .70 | .3000 | 4900 | 4200 | 900 | .7268 | .2732 | 5800 | 4361 | 820 | 5880 | 4200 | 900 | -980 | 14.90 |
| 10000 | .80  | .75 | .2500 | 5625 | 3750 | 625 | .7183 | .2817 | 4579 | 3592 | 704 | 4500 | 3750 | 625 | 1125 | 17.27 |
| 10000 | .81  | .75 | .2500 | 5625 | 3750 | 625 | .7201 | .2799 | 4631 | 3600 | 700 | 4556 | 3750 | 625 | 1069 | 15.42 |
| 10000 | .82  | .75 | .2500 | 5625 | 3750 | 625 | .7218 | .2782 | 4683 | 3609 | 695 | 4613 | 3750 | 625 | 1013 | 13.68 |
| 10000 | .83  | .75 | .2500 | 5625 | 3750 | 625 | .7236 | .2764 | 4735 | 3618 | 691 | 4669 | 3750 | 625 | 956  | 12.07 |
| 10000 | .84  | .75 | .2500 | 5625 | 3750 | 625 | .7253 | .2747 | 4787 | 3626 | 687 | 4725 | 3750 | 625 | 900  | 10.58 |
| 10000 | .85  | .75 | .2500 | 5625 | 3750 | 625 | .7270 | .2730 | 4839 | 3635 | 683 | 4781 | 3750 | 625 | 844  | 9.20  |
| 10000 | .86  | .75 | .2500 | 5625 | 3750 | 625 | .7286 | .2714 | 4891 | 3643 | 678 | 4838 | 3750 | 625 | 788  | 7.92  |
| 10000 | .87  | .75 | .2500 | 5625 | 3750 | 625 | .7303 | .2697 | 4943 | 3651 | 674 | 4894 | 3750 | 625 | 731  | 6.76  |
| 10000 | .88  | .75 | .2500 | 5625 | 3750 | 625 | .7319 | .2681 | 4995 | 3660 | 670 | 4950 | 3750 | 625 | 675  | 5.70  |
| 10000 | .89  | .75 | .2500 | 5625 | 3750 | 625 | .7335 | .2665 | 5047 | 3668 | 666 | 5006 | 3750 | 625 | 619  | 4.74  |
| 10000 | .90  | .75 | .2500 | 5625 | 3750 | 625 | .7351 | .2649 | 5100 | 3675 | 662 | 5063 | 3750 | 625 | 563  | 3.88  |

|       |      |     |       |      |      |     |       |       |      |      |     |      |      |     |       |       |
|-------|------|-----|-------|------|------|-----|-------|-------|------|------|-----|------|------|-----|-------|-------|
| 10000 | .91  | .75 | .2500 | 5625 | 3750 | 625 | .7367 | .2633 | 5152 | 3683 | 658 | 5119 | 3750 | 625 | 506   | 3.11  |
| 10000 | .92  | .75 | .2500 | 5625 | 3750 | 625 | .7382 | .2618 | 5204 | 3691 | 654 | 5175 | 3750 | 625 | 450   | 2.43  |
| 10000 | .93  | .75 | .2500 | 5625 | 3750 | 625 | .7398 | .2602 | 5257 | 3699 | 651 | 5231 | 3750 | 625 | 394   | 1.84  |
| 10000 | .94  | .75 | .2500 | 5625 | 3750 | 625 | .7413 | .2587 | 5309 | 3706 | 647 | 5288 | 3750 | 625 | 338   | 1.34  |
| 10000 | .95  | .75 | .2500 | 5625 | 3750 | 625 | .7428 | .2572 | 5362 | 3714 | 643 | 5344 | 3750 | 625 | 281   | .92   |
| 10000 | .96  | .75 | .2500 | 5625 | 3750 | 625 | .7442 | .2558 | 5414 | 3721 | 639 | 5400 | 3750 | 625 | 225   | .58   |
| 10000 | .97  | .75 | .2500 | 5625 | 3750 | 625 | .7457 | .2543 | 5467 | 3729 | 636 | 5456 | 3750 | 625 | 169   | .33   |
| 10000 | .98  | .75 | .2500 | 5625 | 3750 | 625 | .7472 | .2528 | 5520 | 3736 | 632 | 5513 | 3750 | 625 | 113   | .14   |
| 10000 | .99  | .75 | .2500 | 5625 | 3750 | 625 | .7486 | .2514 | 5572 | 3743 | 629 | 5569 | 3750 | 625 | 56    | .04   |
| 10000 | 1.00 | .75 | .2500 | 5625 | 3750 | 625 | .7500 | .2500 | 5625 | 3750 | 625 | 5625 | 3750 | 625 | 0     | .00   |
| 10000 | 1.01 | .75 | .2500 | 5625 | 3750 | 625 | .7514 | .2486 | 5678 | 3757 | 622 | 5681 | 3750 | 625 | -56   | .03   |
| 10000 | 1.02 | .75 | .2500 | 5625 | 3750 | 625 | .7528 | .2472 | 5731 | 3764 | 618 | 5738 | 3750 | 625 | -113  | .14   |
| 10000 | 1.03 | .75 | .2500 | 5625 | 3750 | 625 | .7541 | .2459 | 5783 | 3771 | 615 | 5794 | 3750 | 625 | -169  | .31   |
| 10000 | 1.04 | .75 | .2500 | 5625 | 3750 | 625 | .7555 | .2445 | 5836 | 3778 | 611 | 5850 | 3750 | 625 | -225  | .54   |
| 10000 | 1.05 | .75 | .2500 | 5625 | 3750 | 625 | .7568 | .2432 | 5889 | 3784 | 608 | 5906 | 3750 | 625 | -281  | .84   |
| 10000 | 1.06 | .75 | .2500 | 5625 | 3750 | 625 | .7582 | .2418 | 5942 | 3791 | 605 | 5963 | 3750 | 625 | -338  | 1.20  |
| 10000 | 1.07 | .75 | .2500 | 5625 | 3750 | 625 | .7595 | .2405 | 5995 | 3797 | 601 | 6019 | 3750 | 625 | -394  | 1.62  |
| 10000 | 1.08 | .75 | .2500 | 5625 | 3750 | 625 | .7608 | .2392 | 6048 | 3804 | 598 | 6075 | 3750 | 625 | -450  | 2.09  |
| 10000 | 1.09 | .75 | .2500 | 5625 | 3750 | 625 | .7620 | .2380 | 6101 | 3810 | 595 | 6131 | 3750 | 625 | -506  | 2.63  |
| 10000 | 1.10 | .75 | .2500 | 5625 | 3750 | 625 | .7633 | .2367 | 6154 | 3817 | 592 | 6188 | 3750 | 625 | -563  | 3.21  |
| 10000 | 1.11 | .75 | .2500 | 5625 | 3750 | 625 | .7646 | .2354 | 6207 | 3823 | 589 | 6244 | 3750 | 625 | -619  | 3.85  |
| 10000 | 1.12 | .75 | .2500 | 5625 | 3750 | 625 | .7658 | .2342 | 6260 | 3829 | 585 | 6300 | 3750 | 625 | -675  | 4.55  |
| 10000 | 1.13 | .75 | .2500 | 5625 | 3750 | 625 | .7670 | .2330 | 6314 | 3835 | 582 | 6356 | 3750 | 625 | -731  | 5.29  |
| 10000 | 1.14 | .75 | .2500 | 5625 | 3750 | 625 | .7683 | .2317 | 6367 | 3841 | 579 | 6413 | 3750 | 625 | -788  | 6.09  |
| 10000 | 1.15 | .75 | .2500 | 5625 | 3750 | 625 | .7695 | .2305 | 6420 | 3847 | 576 | 6469 | 3750 | 625 | -844  | 6.93  |
| 10000 | 1.16 | .75 | .2500 | 5625 | 3750 | 625 | .7706 | .2294 | 6473 | 3853 | 573 | 6525 | 3750 | 625 | -900  | 7.82  |
| 10000 | 1.17 | .75 | .2500 | 5625 | 3750 | 625 | .7718 | .2282 | 6527 | 3859 | 570 | 6581 | 3750 | 625 | -956  | 8.76  |
| 10000 | 1.18 | .75 | .2500 | 5625 | 3750 | 625 | .7730 | .2270 | 6580 | 3865 | 568 | 6638 | 3750 | 625 | -1013 | 9.74  |
| 10000 | 1.19 | .75 | .2500 | 5625 | 3750 | 625 | .7741 | .2259 | 6633 | 3871 | 565 | 6694 | 3750 | 625 | -1069 | 10.76 |
| 10000 | 1.20 | .75 | .2500 | 5625 | 3750 | 625 | .7753 | .2247 | 6687 | 3876 | 562 | 6750 | 3750 | 625 | -1125 | 11.83 |
| 10000 | .80  | .80 | .2000 | 6400 | 3200 | 400 | .7706 | .2294 | 5179 | 3083 | 459 | 5120 | 3200 | 400 | 1280  | 12.65 |
| 10000 | .81  | .80 | .2000 | 6400 | 3200 | 400 | .7723 | .2277 | 5239 | 3089 | 455 | 5184 | 3200 | 400 | 1216  | 11.29 |
| 10000 | .82  | .80 | .2000 | 6400 | 3200 | 400 | .7740 | .2260 | 5300 | 3096 | 452 | 5248 | 3200 | 400 | 1152  | 10.02 |

|       |      |     |       |      |      |     |       |       |      |      |     |      |      |     |      |      |
|-------|------|-----|-------|------|------|-----|-------|-------|------|------|-----|------|------|-----|------|------|
| 10000 | .83  | .80 | .2000 | 6400 | 3200 | 400 | .7756 | .2244 | 5361 | 3102 | 449 | 5312 | 3200 | 400 | 1088 | 8.83 |
| 10000 | .84  | .80 | .2000 | 6400 | 3200 | 400 | .7772 | .2228 | 5422 | 3109 | 446 | 5376 | 3200 | 400 | 1024 | 7.74 |
| 10000 | .85  | .80 | .2000 | 6400 | 3200 | 400 | .7788 | .2212 | 5482 | 3115 | 442 | 5440 | 3200 | 400 | 960  | 6.72 |
| 10000 | .86  | .80 | .2000 | 6400 | 3200 | 400 | .7803 | .2197 | 5543 | 3121 | 439 | 5504 | 3200 | 400 | 896  | 5.79 |
| 10000 | .87  | .80 | .2000 | 6400 | 3200 | 400 | .7818 | .2182 | 5604 | 3127 | 436 | 5568 | 3200 | 400 | 832  | 4.94 |
| 10000 | .88  | .80 | .2000 | 6400 | 3200 | 400 | .7834 | .2166 | 5665 | 3133 | 433 | 5632 | 3200 | 400 | 768  | 4.16 |
| 10000 | .89  | .80 | .2000 | 6400 | 3200 | 400 | .7849 | .2151 | 5726 | 3139 | 430 | 5696 | 3200 | 400 | 704  | 3.46 |
| 10000 | .90  | .80 | .2000 | 6400 | 3200 | 400 | .7863 | .2137 | 5787 | 3145 | 427 | 5760 | 3200 | 400 | 640  | 2.83 |
| 10000 | .91  | .80 | .2000 | 6400 | 3200 | 400 | .7878 | .2122 | 5848 | 3151 | 424 | 5824 | 3200 | 400 | 576  | 2.27 |
| 10000 | .92  | .80 | .2000 | 6400 | 3200 | 400 | .7892 | .2108 | 5910 | 3157 | 422 | 5888 | 3200 | 400 | 512  | 1.77 |
| 10000 | .93  | .80 | .2000 | 6400 | 3200 | 400 | .7906 | .2094 | 5971 | 3162 | 419 | 5952 | 3200 | 400 | 448  | 1.34 |
| 10000 | .94  | .80 | .2000 | 6400 | 3200 | 400 | .7920 | .2080 | 6032 | 3168 | 416 | 6016 | 3200 | 400 | 384  | .98  |
| 10000 | .95  | .80 | .2000 | 6400 | 3200 | 400 | .7934 | .2066 | 6093 | 3174 | 413 | 6080 | 3200 | 400 | 320  | .67  |
| 10000 | .96  | .80 | .2000 | 6400 | 3200 | 400 | .7947 | .2053 | 6155 | 3179 | 411 | 6144 | 3200 | 400 | 256  | .43  |
| 10000 | .97  | .80 | .2000 | 6400 | 3200 | 400 | .7961 | .2039 | 6216 | 3184 | 408 | 6208 | 3200 | 400 | 192  | .24  |
| 10000 | .98  | .80 | .2000 | 6400 | 3200 | 400 | .7974 | .2026 | 6277 | 3190 | 405 | 6272 | 3200 | 400 | 128  | .10  |
| 10000 | .99  | .80 | .2000 | 6400 | 3200 | 400 | .7987 | .2013 | 6339 | 3195 | 403 | 6336 | 3200 | 400 | 64   | .03  |
| 10000 | 1.00 | .80 | .2000 | 6400 | 3200 | 400 | .8000 | .2000 | 6400 | 3200 | 400 | 6400 | 3200 | 400 | 0    | .00  |
| 10000 | 1.01 | .80 | .2000 | 6400 | 3200 | 400 | .8013 | .1987 | 6461 | 3205 | 397 | 6464 | 3200 | 400 | -64  | .03  |
| 10000 | 1.02 | .80 | .2000 | 6400 | 3200 | 400 | .8025 | .1975 | 6523 | 3210 | 395 | 6528 | 3200 | 400 | -128 | .10  |
| 10000 | 1.03 | .80 | .2000 | 6400 | 3200 | 400 | .8038 | .1962 | 6584 | 3215 | 392 | 6592 | 3200 | 400 | -192 | .22  |
| 10000 | 1.04 | .80 | .2000 | 6400 | 3200 | 400 | .8050 | .1950 | 6646 | 3220 | 390 | 6656 | 3200 | 400 | -256 | .39  |
| 10000 | 1.05 | .80 | .2000 | 6400 | 3200 | 400 | .8062 | .1938 | 6708 | 3225 | 388 | 6720 | 3200 | 400 | -320 | .61  |
| 10000 | 1.06 | .80 | .2000 | 6400 | 3200 | 400 | .8074 | .1926 | 6769 | 3230 | 385 | 6784 | 3200 | 400 | -384 | .87  |
| 10000 | 1.07 | .80 | .2000 | 6400 | 3200 | 400 | .8086 | .1914 | 6831 | 3234 | 383 | 6848 | 3200 | 400 | -448 | 1.18 |
| 10000 | 1.08 | .80 | .2000 | 6400 | 3200 | 400 | .8097 | .1903 | 6893 | 3239 | 381 | 6912 | 3200 | 400 | -512 | 1.52 |
| 10000 | 1.09 | .80 | .2000 | 6400 | 3200 | 400 | .8109 | .1891 | 6954 | 3244 | 378 | 6976 | 3200 | 400 | -576 | 1.91 |
| 10000 | 1.10 | .80 | .2000 | 6400 | 3200 | 400 | .8120 | .1880 | 7016 | 3248 | 376 | 7040 | 3200 | 400 | -640 | 2.34 |
| 10000 | 1.11 | .80 | .2000 | 6400 | 3200 | 400 | .8132 | .1868 | 7078 | 3253 | 374 | 7104 | 3200 | 400 | -704 | 2.80 |
| 10000 | 1.12 | .80 | .2000 | 6400 | 3200 | 400 | .8143 | .1857 | 7139 | 3257 | 371 | 7168 | 3200 | 400 | -768 | 3.30 |
| 10000 | 1.13 | .80 | .2000 | 6400 | 3200 | 400 | .8154 | .1846 | 7201 | 3261 | 369 | 7232 | 3200 | 400 | -832 | 3.85 |
| 10000 | 1.14 | .80 | .2000 | 6400 | 3200 | 400 | .8164 | .1836 | 7263 | 3266 | 367 | 7296 | 3200 | 400 | -896 | 4.42 |
| 10000 | 1.15 | .80 | .2000 | 6400 | 3200 | 400 | .8175 | .1825 | 7325 | 3270 | 365 | 7360 | 3200 | 400 | -960 | 5.03 |

|       |      |     |       |      |      |     |       |       |      |      |     |      |      |     |       |      |
|-------|------|-----|-------|------|------|-----|-------|-------|------|------|-----|------|------|-----|-------|------|
| 10000 | 1.16 | .80 | .2000 | 6400 | 3200 | 400 | .8186 | .1814 | 7387 | 3274 | 363 | 7424 | 3200 | 400 | -1024 | 5.68 |
| 10000 | 1.17 | .80 | .2000 | 6400 | 3200 | 400 | .8196 | .1804 | 7449 | 3278 | 361 | 7488 | 3200 | 400 | -1088 | 6.36 |
| 10000 | 1.18 | .80 | .2000 | 6400 | 3200 | 400 | .8207 | .1793 | 7511 | 3283 | 359 | 7552 | 3200 | 400 | -1152 | 7.07 |
| 10000 | 1.19 | .80 | .2000 | 6400 | 3200 | 400 | .8217 | .1783 | 7573 | 3287 | 357 | 7616 | 3200 | 400 | -1216 | 7.81 |
| 10000 | 1.20 | .80 | .2000 | 6400 | 3200 | 400 | .8227 | .1773 | 7635 | 3291 | 355 | 7680 | 3200 | 400 | -1280 | 8.58 |
| 10000 | .80  | .85 | .1500 | 7225 | 2550 | 225 | .8247 | .1753 | 5818 | 2474 | 263 | 5780 | 2550 | 225 | 1445  | 8.08 |
| 10000 | .81  | .85 | .1500 | 7225 | 2550 | 225 | .8261 | .1739 | 5888 | 2478 | 261 | 5852 | 2550 | 225 | 1373  | 7.20 |
| 10000 | .82  | .85 | .1500 | 7225 | 2550 | 225 | .8276 | .1724 | 5958 | 2483 | 259 | 5925 | 2550 | 225 | 1301  | 6.39 |
| 10000 | .83  | .85 | .1500 | 7225 | 2550 | 225 | .8290 | .1710 | 6028 | 2487 | 257 | 5997 | 2550 | 225 | 1228  | 5.63 |
| 10000 | .84  | .85 | .1500 | 7225 | 2550 | 225 | .8304 | .1696 | 6098 | 2491 | 254 | 6069 | 2550 | 225 | 1156  | 4.93 |
| 10000 | .85  | .85 | .1500 | 7225 | 2550 | 225 | .8318 | .1682 | 6169 | 2495 | 252 | 6141 | 2550 | 225 | 1084  | 4.28 |
| 10000 | .86  | .85 | .1500 | 7225 | 2550 | 225 | .8331 | .1669 | 6239 | 2499 | 250 | 6214 | 2550 | 225 | 1012  | 3.69 |
| 10000 | .87  | .85 | .1500 | 7225 | 2550 | 225 | .8345 | .1655 | 6309 | 2503 | 248 | 6286 | 2550 | 225 | 939   | 3.15 |
| 10000 | .88  | .85 | .1500 | 7225 | 2550 | 225 | .8358 | .1642 | 6379 | 2507 | 246 | 6358 | 2550 | 225 | 867   | 2.65 |
| 10000 | .89  | .85 | .1500 | 7225 | 2550 | 225 | .8370 | .1630 | 6450 | 2511 | 244 | 6430 | 2550 | 225 | 795   | 2.20 |
| 10000 | .90  | .85 | .1500 | 7225 | 2550 | 225 | .8383 | .1617 | 6520 | 2515 | 243 | 6503 | 2550 | 225 | 723   | 1.80 |
| 10000 | .91  | .85 | .1500 | 7225 | 2550 | 225 | .8396 | .1604 | 6590 | 2519 | 241 | 6575 | 2550 | 225 | 650   | 1.44 |
| 10000 | .92  | .85 | .1500 | 7225 | 2550 | 225 | .8408 | .1592 | 6661 | 2522 | 239 | 6647 | 2550 | 225 | 578   | 1.13 |
| 10000 | .93  | .85 | .1500 | 7225 | 2550 | 225 | .8420 | .1580 | 6731 | 2526 | 237 | 6719 | 2550 | 225 | 506   | .85  |
| 10000 | .94  | .85 | .1500 | 7225 | 2550 | 225 | .8432 | .1568 | 6802 | 2530 | 235 | 6792 | 2550 | 225 | 434   | .62  |
| 10000 | .95  | .85 | .1500 | 7225 | 2550 | 225 | .8444 | .1556 | 6872 | 2533 | 233 | 6864 | 2550 | 225 | 361   | .43  |
| 10000 | .96  | .85 | .1500 | 7225 | 2550 | 225 | .8455 | .1545 | 6943 | 2537 | 232 | 6936 | 2550 | 225 | 289   | .27  |
| 10000 | .97  | .85 | .1500 | 7225 | 2550 | 225 | .8467 | .1533 | 7013 | 2540 | 230 | 7008 | 2550 | 225 | 217   | .15  |
| 10000 | .98  | .85 | .1500 | 7225 | 2550 | 225 | .8478 | .1522 | 7084 | 2543 | 228 | 7081 | 2550 | 225 | 145   | .07  |
| 10000 | .99  | .85 | .1500 | 7225 | 2550 | 225 | .8489 | .1511 | 7154 | 2547 | 227 | 7153 | 2550 | 225 | 72    | .02  |
| 10000 | 1.00 | .85 | .1500 | 7225 | 2550 | 225 | .8500 | .1500 | 7225 | 2550 | 225 | 7225 | 2550 | 225 | 0     | .00  |
| 10000 | 1.01 | .85 | .1500 | 7225 | 2550 | 225 | .8511 | .1489 | 7296 | 2553 | 223 | 7297 | 2550 | 225 | -72   | .02  |
| 10000 | 1.02 | .85 | .1500 | 7225 | 2550 | 225 | .8521 | .1479 | 7366 | 2556 | 222 | 7370 | 2550 | 225 | -145  | .06  |
| 10000 | 1.03 | .85 | .1500 | 7225 | 2550 | 225 | .8532 | .1468 | 7437 | 2560 | 220 | 7442 | 2550 | 225 | -217  | .14  |
| 10000 | 1.04 | .85 | .1500 | 7225 | 2550 | 225 | .8542 | .1458 | 7508 | 2563 | 219 | 7514 | 2550 | 225 | -289  | .25  |
| 10000 | 1.05 | .85 | .1500 | 7225 | 2550 | 225 | .8552 | .1448 | 7578 | 2566 | 217 | 7586 | 2550 | 225 | -361  | .39  |
| 10000 | 1.06 | .85 | .1500 | 7225 | 2550 | 225 | .8562 | .1438 | 7649 | 2569 | 216 | 7659 | 2550 | 225 | -434  | .55  |
| 10000 | 1.07 | .85 | .1500 | 7225 | 2550 | 225 | .8572 | .1428 | 7720 | 2572 | 214 | 7731 | 2550 | 225 | -506  | .75  |

|       |      |     |       |      |      |     |       |       |      |      |     |      |      |     |       |      |
|-------|------|-----|-------|------|------|-----|-------|-------|------|------|-----|------|------|-----|-------|------|
| 10000 | 1.08 | .85 | .1500 | 7225 | 2550 | 225 | .8582 | .1418 | 7791 | 2575 | 213 | 7803 | 2550 | 225 | -578  | .96  |
| 10000 | 1.09 | .85 | .1500 | 7225 | 2550 | 225 | .8592 | .1408 | 7862 | 2577 | 211 | 7875 | 2550 | 225 | -650  | 1.21 |
| 10000 | 1.10 | .85 | .1500 | 7225 | 2550 | 225 | .8601 | .1399 | 7932 | 2580 | 210 | 7948 | 2550 | 225 | -723  | 1.48 |
| 10000 | 1.11 | .85 | .1500 | 7225 | 2550 | 225 | .8610 | .1390 | 8003 | 2583 | 208 | 8020 | 2550 | 225 | -795  | 1.78 |
| 10000 | 1.12 | .85 | .1500 | 7225 | 2550 | 225 | .8620 | .1380 | 8074 | 2586 | 207 | 8092 | 2550 | 225 | -867  | 2.09 |
| 10000 | 1.13 | .85 | .1500 | 7225 | 2550 | 225 | .8629 | .1371 | 8145 | 2589 | 206 | 8164 | 2550 | 225 | -939  | 2.44 |
| 10000 | 1.14 | .85 | .1500 | 7225 | 2550 | 225 | .8638 | .1362 | 8216 | 2591 | 204 | 8237 | 2550 | 225 | -1012 | 2.80 |
| 10000 | 1.15 | .85 | .1500 | 7225 | 2550 | 225 | .8647 | .1353 | 8287 | 2594 | 203 | 8309 | 2550 | 225 | -1084 | 3.19 |
| 10000 | 1.16 | .85 | .1500 | 7225 | 2550 | 225 | .8655 | .1345 | 8358 | 2597 | 202 | 8381 | 2550 | 225 | -1156 | 3.60 |
| 10000 | 1.17 | .85 | .1500 | 7225 | 2550 | 225 | .8664 | .1336 | 8429 | 2599 | 200 | 8453 | 2550 | 225 | -1228 | 4.03 |
| 10000 | 1.18 | .85 | .1500 | 7225 | 2550 | 225 | .8673 | .1327 | 8500 | 2602 | 199 | 8526 | 2550 | 225 | -1301 | 4.48 |
| 10000 | 1.19 | .85 | .1500 | 7225 | 2550 | 225 | .8681 | .1319 | 8571 | 2604 | 198 | 8598 | 2550 | 225 | -1373 | 4.95 |
| 10000 | 1.20 | .85 | .1500 | 7225 | 2550 | 225 | .8689 | .1311 | 8642 | 2607 | 197 | 8670 | 2550 | 225 | -1445 | 5.44 |
| 10000 | .80  | .90 | .1000 | 8100 | 1800 | 100 | .8807 | .1193 | 6499 | 1761 | 119 | 6480 | 1800 | 100 | 1620  | 4.04 |
| 10000 | .81  | .90 | .1000 | 8100 | 1800 | 100 | .8818 | .1182 | 6579 | 1764 | 118 | 6561 | 1800 | 100 | 1539  | 3.60 |
| 10000 | .82  | .90 | .1000 | 8100 | 1800 | 100 | .8829 | .1171 | 6659 | 1766 | 117 | 6642 | 1800 | 100 | 1458  | 3.19 |
| 10000 | .83  | .90 | .1000 | 8100 | 1800 | 100 | .8840 | .1160 | 6739 | 1768 | 116 | 6723 | 1800 | 100 | 1377  | 2.81 |
| 10000 | .84  | .90 | .1000 | 8100 | 1800 | 100 | .8851 | .1149 | 6819 | 1770 | 115 | 6804 | 1800 | 100 | 1296  | 2.46 |
| 10000 | .85  | .90 | .1000 | 8100 | 1800 | 100 | .8862 | .1138 | 6899 | 1772 | 114 | 6885 | 1800 | 100 | 1215  | 2.14 |
| 10000 | .86  | .90 | .1000 | 8100 | 1800 | 100 | .8872 | .1128 | 6979 | 1774 | 113 | 6966 | 1800 | 100 | 1134  | 1.84 |
| 10000 | .87  | .90 | .1000 | 8100 | 1800 | 100 | .8882 | .1118 | 7059 | 1776 | 112 | 7047 | 1800 | 100 | 1053  | 1.57 |
| 10000 | .88  | .90 | .1000 | 8100 | 1800 | 100 | .8892 | .1108 | 7139 | 1778 | 111 | 7128 | 1800 | 100 | 972   | 1.32 |
| 10000 | .89  | .90 | .1000 | 8100 | 1800 | 100 | .8902 | .1098 | 7219 | 1780 | 110 | 7209 | 1800 | 100 | 891   | 1.10 |
| 10000 | .90  | .90 | .1000 | 8100 | 1800 | 100 | .8912 | .1088 | 7299 | 1782 | 109 | 7290 | 1800 | 100 | 810   | .90  |
| 10000 | .91  | .90 | .1000 | 8100 | 1800 | 100 | .8921 | .1079 | 7379 | 1784 | 108 | 7371 | 1800 | 100 | 729   | .72  |
| 10000 | .92  | .90 | .1000 | 8100 | 1800 | 100 | .8931 | .1069 | 7459 | 1786 | 107 | 7452 | 1800 | 100 | 648   | .56  |
| 10000 | .93  | .90 | .1000 | 8100 | 1800 | 100 | .8940 | .1060 | 7539 | 1788 | 106 | 7533 | 1800 | 100 | 567   | .43  |
| 10000 | .94  | .90 | .1000 | 8100 | 1800 | 100 | .8949 | .1051 | 7619 | 1790 | 105 | 7614 | 1800 | 100 | 486   | .31  |
| 10000 | .95  | .90 | .1000 | 8100 | 1800 | 100 | .8958 | .1042 | 7699 | 1792 | 104 | 7695 | 1800 | 100 | 405   | .21  |
| 10000 | .96  | .90 | .1000 | 8100 | 1800 | 100 | .8967 | .1033 | 7779 | 1793 | 103 | 7776 | 1800 | 100 | 324   | .13  |
| 10000 | .97  | .90 | .1000 | 8100 | 1800 | 100 | .8975 | .1025 | 7859 | 1795 | 102 | 7857 | 1800 | 100 | 243   | .08  |
| 10000 | .98  | .90 | .1000 | 8100 | 1800 | 100 | .8984 | .1016 | 7940 | 1797 | 102 | 7938 | 1800 | 100 | 162   | .03  |
| 10000 | .99  | .90 | .1000 | 8100 | 1800 | 100 | .8992 | .1008 | 8020 | 1798 | 101 | 8019 | 1800 | 100 | 81    | .01  |



|       |      |     |       |      |      |     |       |       |      |      |     |      |      |     |       |      |
|-------|------|-----|-------|------|------|-----|-------|-------|------|------|-----|------|------|-----|-------|------|
| 10000 | 1.00 | .90 | .1000 | 8100 | 1800 | 100 | .9000 | .1000 | 8100 | 1800 | 100 | 8100 | 1800 | 100 | 0     | .00  |
| 10000 | 1.01 | .90 | .1000 | 8100 | 1800 | 100 | .9008 | .0992 | 8180 | 1802 | 99  | 8181 | 1800 | 100 | -81   | .01  |
| 10000 | 1.02 | .90 | .1000 | 8100 | 1800 | 100 | .9016 | .0984 | 8260 | 1803 | 98  | 8262 | 1800 | 100 | -162  | .03  |
| 10000 | 1.03 | .90 | .1000 | 8100 | 1800 | 100 | .9024 | .0976 | 8341 | 1805 | 98  | 8343 | 1800 | 100 | -243  | .07  |
| 10000 | 1.04 | .90 | .1000 | 8100 | 1800 | 100 | .9031 | .0969 | 8421 | 1806 | 97  | 8424 | 1800 | 100 | -324  | .12  |
| 10000 | 1.05 | .90 | .1000 | 8100 | 1800 | 100 | .9039 | .0961 | 8501 | 1808 | 96  | 8505 | 1800 | 100 | -405  | .19  |
| 10000 | 1.06 | .90 | .1000 | 8100 | 1800 | 100 | .9046 | .0954 | 8581 | 1809 | 95  | 8586 | 1800 | 100 | -486  | .28  |
| 10000 | 1.07 | .90 | .1000 | 8100 | 1800 | 100 | .9054 | .0946 | 8662 | 1811 | 95  | 8667 | 1800 | 100 | -567  | .37  |
| 10000 | 1.08 | .90 | .1000 | 8100 | 1800 | 100 | .9061 | .0939 | 8742 | 1812 | 94  | 8748 | 1800 | 100 | -648  | .48  |
| 10000 | 1.09 | .90 | .1000 | 8100 | 1800 | 100 | .9068 | .0932 | 8822 | 1814 | 93  | 8829 | 1800 | 100 | -729  | .60  |
| 10000 | 1.10 | .90 | .1000 | 8100 | 1800 | 100 | .9075 | .0925 | 8903 | 1815 | 93  | 8910 | 1800 | 100 | -810  | .74  |
| 10000 | 1.11 | .90 | .1000 | 8100 | 1800 | 100 | .9082 | .0918 | 8983 | 1816 | 92  | 8991 | 1800 | 100 | -891  | .88  |
| 10000 | 1.12 | .90 | .1000 | 8100 | 1800 | 100 | .9089 | .0911 | 9063 | 1818 | 91  | 9072 | 1800 | 100 | -972  | 1.04 |
| 10000 | 1.13 | .90 | .1000 | 8100 | 1800 | 100 | .9095 | .0905 | 9143 | 1819 | 90  | 9153 | 1800 | 100 | -1053 | 1.21 |
| 10000 | 1.14 | .90 | .1000 | 8100 | 1800 | 100 | .9102 | .0898 | 9224 | 1820 | 90  | 9234 | 1800 | 100 | -1134 | 1.39 |
| 10000 | 1.15 | .90 | .1000 | 8100 | 1800 | 100 | .9108 | .0892 | 9304 | 1822 | 89  | 9315 | 1800 | 100 | -1215 | 1.59 |
| 10000 | 1.16 | .90 | .1000 | 8100 | 1800 | 100 | .9115 | .0885 | 9385 | 1823 | 89  | 9396 | 1800 | 100 | -1296 | 1.79 |
| 10000 | 1.17 | .90 | .1000 | 8100 | 1800 | 100 | .9121 | .0879 | 9465 | 1824 | 88  | 9477 | 1800 | 100 | -1377 | 2.00 |
| 10000 | 1.18 | .90 | .1000 | 8100 | 1800 | 100 | .9127 | .0873 | 9545 | 1825 | 87  | 9558 | 1800 | 100 | -1458 | 2.23 |
| 10000 | 1.19 | .90 | .1000 | 8100 | 1800 | 100 | .9133 | .0867 | 9626 | 1827 | 87  | 9639 | 1800 | 100 | -1539 | 2.46 |
| 10000 | 1.20 | .90 | .1000 | 8100 | 1800 | 100 | .9139 | .0861 | 9706 | 1828 | 86  | 9720 | 1800 | 100 | -1620 | 2.70 |
| 10000 | .80  | .95 | .0500 | 9025 | 950  | 25  | .9390 | .0610 | 7226 | 939  | 31  | 7220 | 950  | 25  | 1805  | 1.13 |
| 10000 | .81  | .95 | .0500 | 9025 | 950  | 25  | .9397 | .0603 | 7315 | 940  | 30  | 7310 | 950  | 25  | 1715  | 1.00 |
| 10000 | .82  | .95 | .0500 | 9025 | 950  | 25  | .9403 | .0597 | 7405 | 940  | 30  | 7401 | 950  | 25  | 1625  | .89  |
| 10000 | .83  | .95 | .0500 | 9025 | 950  | 25  | .9409 | .0591 | 7495 | 941  | 30  | 7491 | 950  | 25  | 1534  | .79  |
| 10000 | .84  | .95 | .0500 | 9025 | 950  | 25  | .9416 | .0584 | 7585 | 942  | 29  | 7581 | 950  | 25  | 1444  | .69  |
| 10000 | .85  | .95 | .0500 | 9025 | 950  | 25  | .9422 | .0578 | 7675 | 942  | 29  | 7671 | 950  | 25  | 1354  | .60  |
| 10000 | .86  | .95 | .0500 | 9025 | 950  | 25  | .9428 | .0572 | 7765 | 943  | 29  | 7762 | 950  | 25  | 1264  | .51  |
| 10000 | .87  | .95 | .0500 | 9025 | 950  | 25  | .9434 | .0566 | 7855 | 943  | 28  | 7852 | 950  | 25  | 1173  | .44  |
| 10000 | .88  | .95 | .0500 | 9025 | 950  | 25  | .9439 | .0561 | 7945 | 944  | 28  | 7942 | 950  | 25  | 1083  | .37  |
| 10000 | .89  | .95 | .0500 | 9025 | 950  | 25  | .9445 | .0555 | 8035 | 944  | 28  | 8032 | 950  | 25  | 993   | .31  |
| 10000 | .90  | .95 | .0500 | 9025 | 950  | 25  | .9450 | .0550 | 8125 | 945  | 27  | 8123 | 950  | 25  | 903   | .25  |
| 10000 | .91  | .95 | .0500 | 9025 | 950  | 25  | .9456 | .0544 | 8215 | 946  | 27  | 8213 | 950  | 25  | 812   | .20  |

|       |      |      |       |       |     |    |            |       |       |     |    |       |     |    |       |     |
|-------|------|------|-------|-------|-----|----|------------|-------|-------|-----|----|-------|-----|----|-------|-----|
| 10000 | .92  | .95  | .0500 | 9025  | 950 | 25 | .9461      | .0539 | 8305  | 946 | 27 | 8303  | 950 | 25 | 722   | .16 |
| 10000 | .93  | .95  | .0500 | 9025  | 950 | 25 | .9466      | .0534 | 8395  | 947 | 27 | 8393  | 950 | 25 | 632   | .12 |
| 10000 | .94  | .95  | .0500 | 9025  | 950 | 25 | .9471      | .0529 | 8485  | 947 | 26 | 8484  | 950 | 25 | 542   | .09 |
| 10000 | .95  | .95  | .0500 | 9025  | 950 | 25 | .9476      | .0524 | 8575  | 948 | 26 | 8574  | 950 | 25 | 451   | .06 |
| 10000 | .96  | .95  | .0500 | 9025  | 950 | 25 | .9481      | .0519 | 8665  | 948 | 26 | 8664  | 950 | 25 | 361   | .04 |
| 10000 | .97  | .95  | .0500 | 9025  | 950 | 25 | .9486      | .0514 | 8755  | 949 | 26 | 8754  | 950 | 25 | 271   | .02 |
| 10000 | .98  | .95  | .0500 | 9025  | 950 | 25 | .9491      | .0509 | 8845  | 949 | 25 | 8845  | 950 | 25 | 181   | .01 |
| 10000 | .99  | .95  | .0500 | 9025  | 950 | 25 | .9495      | .0505 | 8935  | 950 | 25 | 8935  | 950 | 25 | 90    | .00 |
| 10000 | 1.00 | .95  | .0500 | 9025  | 950 | 25 | .9500      | .0500 | 9025  | 950 | 25 | 9025  | 950 | 25 | 0     | .00 |
| 10000 | 1.01 | .95  | .0500 | 9025  | 950 | 25 | .9504      | .0496 | 9115  | 950 | 25 | 9115  | 950 | 25 | -90   | .00 |
| 10000 | 1.02 | .95  | .0500 | 9025  | 950 | 25 | .9509      | .0491 | 9205  | 951 | 25 | 9206  | 950 | 25 | -181  | .01 |
| 10000 | 1.03 | .95  | .0500 | 9025  | 950 | 25 | .9513      | .0487 | 9295  | 951 | 24 | 9296  | 950 | 25 | -271  | .02 |
| 10000 | 1.04 | .95  | .0500 | 9025  | 950 | 25 | .9517      | .0483 | 9385  | 952 | 24 | 9386  | 950 | 25 | -361  | .03 |
| 10000 | 1.05 | .95  | .0500 | 9025  | 950 | 25 | .9522      | .0478 | 9475  | 952 | 24 | 9476  | 950 | 25 | -451  | .05 |
| 10000 | 1.06 | .95  | .0500 | 9025  | 950 | 25 | .9526      | .0474 | 9565  | 953 | 24 | 9567  | 950 | 25 | -542  | .08 |
| 10000 | 1.07 | .95  | .0500 | 9025  | 950 | 25 | .9530      | .0470 | 9655  | 953 | 24 | 9657  | 950 | 25 | -632  | .10 |
| 10000 | 1.08 | .95  | .0500 | 9025  | 950 | 25 | .9534      | .0466 | 9745  | 953 | 23 | 9747  | 950 | 25 | -722  | .13 |
| 10000 | 1.09 | .95  | .0500 | 9025  | 950 | 25 | .9538      | .0462 | 9835  | 954 | 23 | 9837  | 950 | 25 | -812  | .17 |
| 10000 | 1.10 | .95  | .0500 | 9025  | 950 | 25 | .9541      | .0459 | 9925  | 954 | 23 | 9928  | 950 | 25 | -903  | .21 |
| 10000 | 1.11 | .95  | .0500 | 9025  | 950 | 25 | .9545      | .0455 | 10015 | 955 | 23 | 10018 | 950 | 25 | -993  | .25 |
| 10000 | 1.12 | .95  | .0500 | 9025  | 950 | 25 | .9549      | .0451 | 10106 | 955 | 23 | 10108 | 950 | 25 | -1083 | .29 |
| 10000 | 1.13 | .95  | .0500 | 9025  | 950 | 25 | .9553      | .0447 | 10196 | 955 | 22 | 10198 | 950 | 25 | -1173 | .34 |
| 10000 | 1.14 | .95  | .0500 | 9025  | 950 | 25 | .9556      | .0444 | 10286 | 956 | 22 | 10289 | 950 | 25 | -1264 | .39 |
| 10000 | 1.15 | .95  | .0500 | 9025  | 950 | 25 | .9560      | .0440 | 10376 | 956 | 22 | 10379 | 950 | 25 | -1354 | .44 |
| 10000 | 1.16 | .95  | .0500 | 9025  | 950 | 25 | .9563      | .0437 | 10466 | 956 | 22 | 10469 | 950 | 25 | -1444 | .50 |
| 10000 | 1.17 | .95  | .0500 | 9025  | 950 | 25 | .9567      | .0433 | 10556 | 957 | 22 | 10559 | 950 | 25 | -1534 | .56 |
| 10000 | 1.18 | .95  | .0500 | 9025  | 950 | 25 | .9570      | .0430 | 10646 | 957 | 22 | 10650 | 950 | 25 | -1625 | .62 |
| 10000 | 1.19 | .95  | .0500 | 9025  | 950 | 25 | .9573      | .0427 | 10736 | 957 | 21 | 10740 | 950 | 25 | -1715 | .68 |
| 10000 | 1.20 | .95  | .0500 | 9025  | 950 | 25 | .9576      | .0424 | 10826 | 958 | 21 | 10830 | 950 | 25 | -1805 | .75 |
| 10000 | .80  | 1.00 | .0000 | 10000 | 0   | 0  | 1.000<br>0 | .0000 | 8000  | 0   | 0  | 8000  | 0   | 0  | 2000  | .75 |
| 10000 | .81  | 1.00 | .0000 | 10000 | 0   | 0  | 1.000<br>0 | .0000 | 8100  | 0   | 0  | 8100  | 0   | 0  | 1900  | .75 |

|       |     |      |       |       |   |   |            |       |      |   |   |      |   |   |      |     |
|-------|-----|------|-------|-------|---|---|------------|-------|------|---|---|------|---|---|------|-----|
| 10000 | .82 | 1.00 | .0000 | 10000 | 0 | 0 | 1.000<br>0 | .0000 | 8200 | 0 | 0 | 8200 | 0 | 0 | 1800 | .75 |
| 10000 | .83 | 1.00 | .0000 | 10000 | 0 | 0 | 1.000<br>0 | .0000 | 8300 | 0 | 0 | 8300 | 0 | 0 | 1700 | .75 |
| 10000 | .84 | 1.00 | .0000 | 10000 | 0 | 0 | 1.000<br>0 | .0000 | 8400 | 0 | 0 | 8400 | 0 | 0 | 1600 | .75 |
| 10000 | .85 | 1.00 | .0000 | 10000 | 0 | 0 | 1.000<br>0 | .0000 | 8500 | 0 | 0 | 8500 | 0 | 0 | 1500 | .75 |
| 10000 | .86 | 1.00 | .0000 | 10000 | 0 | 0 | 1.000<br>0 | .0000 | 8600 | 0 | 0 | 8600 | 0 | 0 | 1400 | .75 |
| 10000 | .87 | 1.00 | .0000 | 10000 | 0 | 0 | 1.000<br>0 | .0000 | 8700 | 0 | 0 | 8700 | 0 | 0 | 1300 | .75 |
| 10000 | .88 | 1.00 | .0000 | 10000 | 0 | 0 | 1.000<br>0 | .0000 | 8800 | 0 | 0 | 8800 | 0 | 0 | 1200 | .75 |
| 10000 | .89 | 1.00 | .0000 | 10000 | 0 | 0 | 1.000<br>0 | .0000 | 8900 | 0 | 0 | 8900 | 0 | 0 | 1100 | .75 |
| 10000 | .90 | 1.00 | .0000 | 10000 | 0 | 0 | 1.000<br>0 | .0000 | 9000 | 0 | 0 | 9000 | 0 | 0 | 1000 | .75 |
| 10000 | .91 | 1.00 | .0000 | 10000 | 0 | 0 | 1.000<br>0 | .0000 | 9100 | 0 | 0 | 9100 | 0 | 0 | 900  | .75 |
| 10000 | .92 | 1.00 | .0000 | 10000 | 0 | 0 | 1.000<br>0 | .0000 | 9200 | 0 | 0 | 9200 | 0 | 0 | 800  | .75 |
| 10000 | .93 | 1.00 | .0000 | 10000 | 0 | 0 | 1.000<br>0 | .0000 | 9300 | 0 | 0 | 9300 | 0 | 0 | 700  | .75 |
| 10000 | .94 | 1.00 | .0000 | 10000 | 0 | 0 | 1.000<br>0 | .0000 | 9400 | 0 | 0 | 9400 | 0 | 0 | 600  | .75 |
| 10000 | .95 | 1.00 | .0000 | 10000 | 0 | 0 | 1.000<br>0 | .0000 | 9500 | 0 | 0 | 9500 | 0 | 0 | 500  | .75 |
| 10000 | .96 | 1.00 | .0000 | 10000 | 0 | 0 | 1.000<br>0 | .0000 | 9600 | 0 | 0 | 9600 | 0 | 0 | 400  | .75 |
| 10000 | .97 | 1.00 | .0000 | 10000 | 0 | 0 | 1.000<br>0 | .0000 | 9700 | 0 | 0 | 9700 | 0 | 0 | 300  | .75 |
| 10000 | .98 | 1.00 | .0000 | 10000 | 0 | 0 | 1.000<br>0 | .0000 | 9800 | 0 | 0 | 9800 | 0 | 0 | 200  | .75 |

|       |      |      |       |       |   |   |            |       |       |   |   |       |   |   |       |     |
|-------|------|------|-------|-------|---|---|------------|-------|-------|---|---|-------|---|---|-------|-----|
| 10000 | .99  | 1.00 | .0000 | 10000 | 0 | 0 | 1.000<br>0 | .0000 | 9900  | 0 | 0 | 9900  | 0 | 0 | 100   | .75 |
| 10000 | 1.00 | 1.00 | .0000 | 10000 | 0 | 0 | 1.000<br>0 | .0000 | 10000 | 0 | 0 | 10000 | 0 | 0 | 0     | .75 |
| 10000 | 1.01 | 1.00 | .0000 | 10000 | 0 | 0 | 1.000<br>0 | .0000 | 10100 | 0 | 0 | 10100 | 0 | 0 | -100  | .75 |
| 10000 | 1.02 | 1.00 | .0000 | 10000 | 0 | 0 | 1.000<br>0 | .0000 | 10200 | 0 | 0 | 10200 | 0 | 0 | -200  | .75 |
| 10000 | 1.03 | 1.00 | .0000 | 10000 | 0 | 0 | 1.000<br>0 | .0000 | 10300 | 0 | 0 | 10300 | 0 | 0 | -300  | .75 |
| 10000 | 1.04 | 1.00 | .0000 | 10000 | 0 | 0 | 1.000<br>0 | .0000 | 10400 | 0 | 0 | 10400 | 0 | 0 | -400  | .75 |
| 10000 | 1.05 | 1.00 | .0000 | 10000 | 0 | 0 | 1.000<br>0 | .0000 | 10500 | 0 | 0 | 10500 | 0 | 0 | -500  | .75 |
| 10000 | 1.06 | 1.00 | .0000 | 10000 | 0 | 0 | 1.000<br>0 | .0000 | 10600 | 0 | 0 | 10600 | 0 | 0 | -600  | .75 |
| 10000 | 1.07 | 1.00 | .0000 | 10000 | 0 | 0 | 1.000<br>0 | .0000 | 10700 | 0 | 0 | 10700 | 0 | 0 | -700  | .75 |
| 10000 | 1.08 | 1.00 | .0000 | 10000 | 0 | 0 | 1.000<br>0 | .0000 | 10800 | 0 | 0 | 10800 | 0 | 0 | -800  | .75 |
| 10000 | 1.09 | 1.00 | .0000 | 10000 | 0 | 0 | 1.000<br>0 | .0000 | 10900 | 0 | 0 | 10900 | 0 | 0 | -900  | .75 |
| 10000 | 1.10 | 1.00 | .0000 | 10000 | 0 | 0 | 1.000<br>0 | .0000 | 11000 | 0 | 0 | 11000 | 0 | 0 | -1000 | .75 |
| 10000 | 1.11 | 1.00 | .0000 | 10000 | 0 | 0 | 1.000<br>0 | .0000 | 11100 | 0 | 0 | 11100 | 0 | 0 | -1100 | .75 |
| 10000 | 1.12 | 1.00 | .0000 | 10000 | 0 | 0 | 1.000<br>0 | .0000 | 11200 | 0 | 0 | 11200 | 0 | 0 | -1200 | .75 |
| 10000 | 1.13 | 1.00 | .0000 | 10000 | 0 | 0 | 1.000<br>0 | .0000 | 11300 | 0 | 0 | 11300 | 0 | 0 | -1300 | .75 |
| 10000 | 1.14 | 1.00 | .0000 | 10000 | 0 | 0 | 1.000<br>0 | .0000 | 11400 | 0 | 0 | 11400 | 0 | 0 | -1400 | .75 |
| 10000 | 1.15 | 1.00 | .0000 | 10000 | 0 | 0 | 1.000<br>0 | .0000 | 11500 | 0 | 0 | 11500 | 0 | 0 | -1500 | .75 |

|       |      |      |       |       |      |       |            |       |       |      |       |       |      |       |       |      |
|-------|------|------|-------|-------|------|-------|------------|-------|-------|------|-------|-------|------|-------|-------|------|
| 10000 | 1.16 | 1.00 | .0000 | 10000 | 0    | 0     | 1.000<br>0 | .0000 | 11600 | 0    | 0     | 11600 | 0    | 0     | -1600 | .75  |
| 10000 | 1.17 | 1.00 | .0000 | 10000 | 0    | 0     | 1.000<br>0 | .0000 | 11700 | 0    | 0     | 11700 | 0    | 0     | -1700 | .75  |
| 10000 | 1.18 | 1.00 | .0000 | 10000 | 0    | 0     | 1.000<br>0 | .0000 | 11800 | 0    | 0     | 11800 | 0    | 0     | -1800 | .75  |
| 10000 | 1.19 | 1.00 | .0000 | 10000 | 0    | 0     | 1.000<br>0 | .0000 | 11900 | 0    | 0     | 11900 | 0    | 0     | -1900 | .75  |
| 10000 | 1.20 | 1.00 | .0000 | 10000 | 0    | 0     | 1.000<br>0 | .0000 | 12000 | 0    | 0     | 12000 | 0    | 0     | -2000 | .75  |
| 20000 | .80  | .05  | .9500 | 50    | 1900 | 18050 | .0495      | .9505 | 49    | 1882 | 18059 | 40    | 1900 | 18050 | 10    | 1.84 |
| 20000 | .81  | .05  | .9500 | 50    | 1900 | 18050 | .0495      | .9505 | 49    | 1883 | 18059 | 41    | 1900 | 18050 | 10    | 1.66 |
| 20000 | .82  | .05  | .9500 | 50    | 1900 | 18050 | .0496      | .9504 | 49    | 1884 | 18058 | 41    | 1900 | 18050 | 9     | 1.49 |
| 20000 | .83  | .05  | .9500 | 50    | 1900 | 18050 | .0496      | .9504 | 49    | 1885 | 18058 | 42    | 1900 | 18050 | 9     | 1.33 |
| 20000 | .84  | .05  | .9500 | 50    | 1900 | 18050 | .0496      | .9504 | 49    | 1886 | 18057 | 42    | 1900 | 18050 | 8     | 1.17 |
| 20000 | .85  | .05  | .9500 | 50    | 1900 | 18050 | .0496      | .9504 | 49    | 1886 | 18057 | 43    | 1900 | 18050 | 8     | 1.03 |
| 20000 | .86  | .05  | .9500 | 50    | 1900 | 18050 | .0497      | .9503 | 49    | 1887 | 18056 | 43    | 1900 | 18050 | 7     | .90  |
| 20000 | .87  | .05  | .9500 | 50    | 1900 | 18050 | .0497      | .9503 | 49    | 1888 | 18056 | 44    | 1900 | 18050 | 7     | .77  |
| 20000 | .88  | .05  | .9500 | 50    | 1900 | 18050 | .0497      | .9503 | 49    | 1889 | 18055 | 44    | 1900 | 18050 | 6     | .66  |
| 20000 | .89  | .05  | .9500 | 50    | 1900 | 18050 | .0497      | .9503 | 49    | 1890 | 18055 | 45    | 1900 | 18050 | 6     | .55  |
| 20000 | .90  | .05  | .9500 | 50    | 1900 | 18050 | .0498      | .9502 | 50    | 1891 | 18055 | 45    | 1900 | 18050 | 5     | .46  |
| 20000 | .91  | .05  | .9500 | 50    | 1900 | 18050 | .0498      | .9502 | 50    | 1892 | 18054 | 46    | 1900 | 18050 | 5     | .37  |
| 20000 | .92  | .05  | .9500 | 50    | 1900 | 18050 | .0498      | .9502 | 50    | 1893 | 18054 | 46    | 1900 | 18050 | 4     | .29  |
| 20000 | .93  | .05  | .9500 | 50    | 1900 | 18050 | .0498      | .9502 | 50    | 1894 | 18053 | 47    | 1900 | 18050 | 4     | .22  |
| 20000 | .94  | .05  | .9500 | 50    | 1900 | 18050 | .0499      | .9501 | 50    | 1895 | 18053 | 47    | 1900 | 18050 | 3     | .16  |
| 20000 | .95  | .05  | .9500 | 50    | 1900 | 18050 | .0499      | .9501 | 50    | 1895 | 18052 | 48    | 1900 | 18050 | 3     | .11  |
| 20000 | .96  | .05  | .9500 | 50    | 1900 | 18050 | .0499      | .9501 | 50    | 1896 | 18052 | 48    | 1900 | 18050 | 2     | .07  |
| 20000 | .97  | .05  | .9500 | 50    | 1900 | 18050 | .0499      | .9501 | 50    | 1897 | 18051 | 49    | 1900 | 18050 | 2     | .04  |
| 20000 | .98  | .05  | .9500 | 50    | 1900 | 18050 | .0500      | .9500 | 50    | 1898 | 18051 | 49    | 1900 | 18050 | 1     | .02  |
| 20000 | .99  | .05  | .9500 | 50    | 1900 | 18050 | .0500      | .9500 | 50    | 1899 | 18050 | 50    | 1900 | 18050 | 1     | .00  |
| 20000 | 1.00 | .05  | .9500 | 50    | 1900 | 18050 | .0500      | .9500 | 50    | 1900 | 18050 | 50    | 1900 | 18050 | 0     | .00  |
| 20000 | 1.01 | .05  | .9500 | 50    | 1900 | 18050 | .0500      | .9500 | 50    | 1901 | 18050 | 51    | 1900 | 18050 | -1    | .00  |
| 20000 | 1.02 | .05  | .9500 | 50    | 1900 | 18050 | .0500      | .9500 | 50    | 1902 | 18049 | 51    | 1900 | 18050 | -1    | .02  |

|       |      |     |       |     |      |       |       |       |     |      |       |     |      |       |     |      |
|-------|------|-----|-------|-----|------|-------|-------|-------|-----|------|-------|-----|------|-------|-----|------|
| 20000 | 1.03 | .05 | .9500 | 50  | 1900 | 18050 | .0501 | .9499 | 50  | 1903 | 18049 | 52  | 1900 | 18050 | -2  | .04  |
| 20000 | 1.04 | .05 | .9500 | 50  | 1900 | 18050 | .0501 | .9499 | 50  | 1904 | 18048 | 52  | 1900 | 18050 | -2  | .07  |
| 20000 | 1.05 | .05 | .9500 | 50  | 1900 | 18050 | .0501 | .9499 | 50  | 1905 | 18048 | 53  | 1900 | 18050 | -3  | .11  |
| 20000 | 1.06 | .05 | .9500 | 50  | 1900 | 18050 | .0501 | .9499 | 50  | 1905 | 18047 | 53  | 1900 | 18050 | -3  | .16  |
| 20000 | 1.07 | .05 | .9500 | 50  | 1900 | 18050 | .0502 | .9498 | 50  | 1906 | 18047 | 54  | 1900 | 18050 | -4  | .22  |
| 20000 | 1.08 | .05 | .9500 | 50  | 1900 | 18050 | .0502 | .9498 | 50  | 1907 | 18046 | 54  | 1900 | 18050 | -4  | .29  |
| 20000 | 1.09 | .05 | .9500 | 50  | 1900 | 18050 | .0502 | .9498 | 50  | 1908 | 18046 | 55  | 1900 | 18050 | -5  | .36  |
| 20000 | 1.10 | .05 | .9500 | 50  | 1900 | 18050 | .0502 | .9498 | 50  | 1909 | 18045 | 55  | 1900 | 18050 | -5  | .45  |
| 20000 | 1.11 | .05 | .9500 | 50  | 1900 | 18050 | .0503 | .9497 | 51  | 1910 | 18045 | 56  | 1900 | 18050 | -6  | .54  |
| 20000 | 1.12 | .05 | .9500 | 50  | 1900 | 18050 | .0503 | .9497 | 51  | 1911 | 18045 | 56  | 1900 | 18050 | -6  | .64  |
| 20000 | 1.13 | .05 | .9500 | 50  | 1900 | 18050 | .0503 | .9497 | 51  | 1912 | 18044 | 57  | 1900 | 18050 | -7  | .75  |
| 20000 | 1.14 | .05 | .9500 | 50  | 1900 | 18050 | .0503 | .9497 | 51  | 1913 | 18044 | 57  | 1900 | 18050 | -7  | .87  |
| 20000 | 1.15 | .05 | .9500 | 50  | 1900 | 18050 | .0504 | .9496 | 51  | 1914 | 18043 | 58  | 1900 | 18050 | -8  | 1.00 |
| 20000 | 1.16 | .05 | .9500 | 50  | 1900 | 18050 | .0504 | .9496 | 51  | 1914 | 18043 | 58  | 1900 | 18050 | -8  | 1.14 |
| 20000 | 1.17 | .05 | .9500 | 50  | 1900 | 18050 | .0504 | .9496 | 51  | 1915 | 18042 | 59  | 1900 | 18050 | -9  | 1.28 |
| 20000 | 1.18 | .05 | .9500 | 50  | 1900 | 18050 | .0504 | .9496 | 51  | 1916 | 18042 | 59  | 1900 | 18050 | -9  | 1.44 |
| 20000 | 1.19 | .05 | .9500 | 50  | 1900 | 18050 | .0505 | .9495 | 51  | 1917 | 18041 | 60  | 1900 | 18050 | -10 | 1.60 |
| 20000 | 1.20 | .05 | .9500 | 50  | 1900 | 18050 | .0505 | .9495 | 51  | 1918 | 18041 | 60  | 1900 | 18050 | -10 | 1.77 |
| 20000 | .80  | .10 | .9000 | 200 | 3600 | 16200 | .0982 | .9018 | 192 | 3535 | 16232 | 160 | 3600 | 16200 | 40  | 6.73 |
| 20000 | .81  | .10 | .9000 | 200 | 3600 | 16200 | .0983 | .9017 | 193 | 3538 | 16231 | 162 | 3600 | 16200 | 38  | 6.07 |
| 20000 | .82  | .10 | .9000 | 200 | 3600 | 16200 | .0984 | .9016 | 193 | 3542 | 16229 | 164 | 3600 | 16200 | 36  | 5.43 |
| 20000 | .83  | .10 | .9000 | 200 | 3600 | 16200 | .0985 | .9015 | 194 | 3545 | 16228 | 166 | 3600 | 16200 | 34  | 4.84 |
| 20000 | .84  | .10 | .9000 | 200 | 3600 | 16200 | .0986 | .9014 | 194 | 3548 | 16226 | 168 | 3600 | 16200 | 32  | 4.28 |
| 20000 | .85  | .10 | .9000 | 200 | 3600 | 16200 | .0986 | .9014 | 194 | 3551 | 16224 | 170 | 3600 | 16200 | 30  | 3.75 |
| 20000 | .86  | .10 | .9000 | 200 | 3600 | 16200 | .0987 | .9013 | 195 | 3555 | 16223 | 172 | 3600 | 16200 | 28  | 3.26 |
| 20000 | .87  | .10 | .9000 | 200 | 3600 | 16200 | .0988 | .9012 | 195 | 3558 | 16221 | 174 | 3600 | 16200 | 26  | 2.81 |
| 20000 | .88  | .10 | .9000 | 200 | 3600 | 16200 | .0989 | .9011 | 195 | 3561 | 16219 | 176 | 3600 | 16200 | 24  | 2.39 |
| 20000 | .89  | .10 | .9000 | 200 | 3600 | 16200 | .0990 | .9010 | 196 | 3564 | 16218 | 178 | 3600 | 16200 | 22  | 2.00 |
| 20000 | .90  | .10 | .9000 | 200 | 3600 | 16200 | .0991 | .9009 | 196 | 3568 | 16216 | 180 | 3600 | 16200 | 20  | 1.65 |
| 20000 | .91  | .10 | .9000 | 200 | 3600 | 16200 | .0992 | .9008 | 197 | 3571 | 16215 | 182 | 3600 | 16200 | 18  | 1.33 |
| 20000 | .92  | .10 | .9000 | 200 | 3600 | 16200 | .0993 | .9007 | 197 | 3574 | 16213 | 184 | 3600 | 16200 | 16  | 1.05 |
| 20000 | .93  | .10 | .9000 | 200 | 3600 | 16200 | .0994 | .9006 | 197 | 3577 | 16211 | 186 | 3600 | 16200 | 14  | .80  |
| 20000 | .94  | .10 | .9000 | 200 | 3600 | 16200 | .0995 | .9005 | 198 | 3581 | 16210 | 188 | 3600 | 16200 | 12  | .59  |

|       |      |     |       |     |      |       |       |       |     |      |       |     |      |       |     |       |
|-------|------|-----|-------|-----|------|-------|-------|-------|-----|------|-------|-----|------|-------|-----|-------|
| 20000 | .95  | .10 | .9000 | 200 | 3600 | 16200 | .0995 | .9005 | 198 | 3584 | 16208 | 190 | 3600 | 16200 | 10  | .41   |
| 20000 | .96  | .10 | .9000 | 200 | 3600 | 16200 | .0996 | .9004 | 198 | 3587 | 16206 | 192 | 3600 | 16200 | 8   | .26   |
| 20000 | .97  | .10 | .9000 | 200 | 3600 | 16200 | .0997 | .9003 | 199 | 3590 | 16205 | 194 | 3600 | 16200 | 6   | .15   |
| 20000 | .98  | .10 | .9000 | 200 | 3600 | 16200 | .0998 | .9002 | 199 | 3594 | 16203 | 196 | 3600 | 16200 | 4   | .07   |
| 20000 | .99  | .10 | .9000 | 200 | 3600 | 16200 | .0999 | .9001 | 200 | 3597 | 16202 | 198 | 3600 | 16200 | 2   | .02   |
| 20000 | 1.00 | .10 | .9000 | 200 | 3600 | 16200 | .1000 | .9000 | 200 | 3600 | 16200 | 200 | 3600 | 16200 | 0   | .00   |
| 20000 | 1.01 | .10 | .9000 | 200 | 3600 | 16200 | .1001 | .8999 | 200 | 3603 | 16198 | 202 | 3600 | 16200 | -2  | .02   |
| 20000 | 1.02 | .10 | .9000 | 200 | 3600 | 16200 | .1002 | .8998 | 201 | 3606 | 16197 | 204 | 3600 | 16200 | -4  | .06   |
| 20000 | 1.03 | .10 | .9000 | 200 | 3600 | 16200 | .1003 | .8997 | 201 | 3610 | 16195 | 206 | 3600 | 16200 | -6  | .14   |
| 20000 | 1.04 | .10 | .9000 | 200 | 3600 | 16200 | .1004 | .8996 | 202 | 3613 | 16194 | 208 | 3600 | 16200 | -8  | .26   |
| 20000 | 1.05 | .10 | .9000 | 200 | 3600 | 16200 | .1004 | .8996 | 202 | 3616 | 16192 | 210 | 3600 | 16200 | -10 | .40   |
| 20000 | 1.06 | .10 | .9000 | 200 | 3600 | 16200 | .1005 | .8995 | 202 | 3619 | 16190 | 212 | 3600 | 16200 | -12 | .58   |
| 20000 | 1.07 | .10 | .9000 | 200 | 3600 | 16200 | .1006 | .8994 | 203 | 3623 | 16189 | 214 | 3600 | 16200 | -14 | .78   |
| 20000 | 1.08 | .10 | .9000 | 200 | 3600 | 16200 | .1007 | .8993 | 203 | 3626 | 16187 | 216 | 3600 | 16200 | -16 | 1.02  |
| 20000 | 1.09 | .10 | .9000 | 200 | 3600 | 16200 | .1008 | .8992 | 203 | 3629 | 16185 | 218 | 3600 | 16200 | -18 | 1.29  |
| 20000 | 1.10 | .10 | .9000 | 200 | 3600 | 16200 | .1009 | .8991 | 204 | 3632 | 16184 | 220 | 3600 | 16200 | -20 | 1.59  |
| 20000 | 1.11 | .10 | .9000 | 200 | 3600 | 16200 | .1010 | .8990 | 204 | 3636 | 16182 | 222 | 3600 | 16200 | -22 | 1.92  |
| 20000 | 1.12 | .10 | .9000 | 200 | 3600 | 16200 | .1011 | .8989 | 205 | 3639 | 16181 | 224 | 3600 | 16200 | -24 | 2.28  |
| 20000 | 1.13 | .10 | .9000 | 200 | 3600 | 16200 | .1012 | .8988 | 205 | 3642 | 16179 | 226 | 3600 | 16200 | -26 | 2.67  |
| 20000 | 1.14 | .10 | .9000 | 200 | 3600 | 16200 | .1013 | .8987 | 205 | 3645 | 16177 | 228 | 3600 | 16200 | -28 | 3.09  |
| 20000 | 1.15 | .10 | .9000 | 200 | 3600 | 16200 | .1013 | .8987 | 206 | 3649 | 16176 | 230 | 3600 | 16200 | -30 | 3.54  |
| 20000 | 1.16 | .10 | .9000 | 200 | 3600 | 16200 | .1014 | .8986 | 206 | 3652 | 16174 | 232 | 3600 | 16200 | -32 | 4.02  |
| 20000 | 1.17 | .10 | .9000 | 200 | 3600 | 16200 | .1015 | .8985 | 207 | 3655 | 16173 | 234 | 3600 | 16200 | -34 | 4.53  |
| 20000 | 1.18 | .10 | .9000 | 200 | 3600 | 16200 | .1016 | .8984 | 207 | 3658 | 16171 | 236 | 3600 | 16200 | -36 | 5.07  |
| 20000 | 1.19 | .10 | .9000 | 200 | 3600 | 16200 | .1017 | .8983 | 207 | 3661 | 16169 | 238 | 3600 | 16200 | -38 | 5.64  |
| 20000 | 1.20 | .10 | .9000 | 200 | 3600 | 16200 | .1018 | .8982 | 208 | 3665 | 16168 | 240 | 3600 | 16200 | -40 | 6.24  |
| 20000 | .80  | .15 | .8500 | 450 | 5100 | 14450 | .1462 | .8538 | 425 | 4969 | 14515 | 360 | 5100 | 14450 | 90  | 13.76 |
| 20000 | .81  | .15 | .8500 | 450 | 5100 | 14450 | .1464 | .8536 | 427 | 4976 | 14512 | 365 | 5100 | 14450 | 86  | 12.38 |
| 20000 | .82  | .15 | .8500 | 450 | 5100 | 14450 | .1465 | .8535 | 428 | 4982 | 14509 | 369 | 5100 | 14450 | 81  | 11.08 |
| 20000 | .83  | .15 | .8500 | 450 | 5100 | 14450 | .1467 | .8533 | 429 | 4989 | 14505 | 374 | 5100 | 14450 | 77  | 9.86  |
| 20000 | .84  | .15 | .8500 | 450 | 5100 | 14450 | .1469 | .8531 | 430 | 4996 | 14502 | 378 | 5100 | 14450 | 72  | 8.71  |
| 20000 | .85  | .15 | .8500 | 450 | 5100 | 14450 | .1471 | .8529 | 431 | 5002 | 14499 | 383 | 5100 | 14450 | 68  | 7.63  |
| 20000 | .86  | .15 | .8500 | 450 | 5100 | 14450 | .1473 | .8527 | 433 | 5009 | 14496 | 387 | 5100 | 14450 | 63  | 6.63  |

|       |      |     |       |     |      |       |       |       |     |      |       |     |      |       |     |       |
|-------|------|-----|-------|-----|------|-------|-------|-------|-----|------|-------|-----|------|-------|-----|-------|
| 20000 | .87  | .15 | .8500 | 450 | 5100 | 14450 | .1475 | .8525 | 434 | 5015 | 14492 | 392 | 5100 | 14450 | 59  | 5.70  |
| 20000 | .88  | .15 | .8500 | 450 | 5100 | 14450 | .1477 | .8523 | 435 | 5022 | 14489 | 396 | 5100 | 14450 | 54  | 4.84  |
| 20000 | .89  | .15 | .8500 | 450 | 5100 | 14450 | .1479 | .8521 | 436 | 5028 | 14486 | 401 | 5100 | 14450 | 50  | 4.06  |
| 20000 | .90  | .15 | .8500 | 450 | 5100 | 14450 | .1481 | .8519 | 438 | 5035 | 14483 | 405 | 5100 | 14450 | 45  | 3.34  |
| 20000 | .91  | .15 | .8500 | 450 | 5100 | 14450 | .1483 | .8517 | 439 | 5041 | 14479 | 410 | 5100 | 14450 | 41  | 2.70  |
| 20000 | .92  | .15 | .8500 | 450 | 5100 | 14450 | .1485 | .8515 | 440 | 5048 | 14476 | 414 | 5100 | 14450 | 36  | 2.13  |
| 20000 | .93  | .15 | .8500 | 450 | 5100 | 14450 | .1487 | .8513 | 441 | 5054 | 14473 | 419 | 5100 | 14450 | 32  | 1.62  |
| 20000 | .94  | .15 | .8500 | 450 | 5100 | 14450 | .1489 | .8511 | 443 | 5061 | 14470 | 423 | 5100 | 14450 | 27  | 1.19  |
| 20000 | .95  | .15 | .8500 | 450 | 5100 | 14450 | .1490 | .8510 | 444 | 5067 | 14466 | 428 | 5100 | 14450 | 23  | .82   |
| 20000 | .96  | .15 | .8500 | 450 | 5100 | 14450 | .1492 | .8508 | 445 | 5074 | 14463 | 432 | 5100 | 14450 | 18  | .53   |
| 20000 | .97  | .15 | .8500 | 450 | 5100 | 14450 | .1494 | .8506 | 446 | 5080 | 14460 | 437 | 5100 | 14450 | 14  | .30   |
| 20000 | .98  | .15 | .8500 | 450 | 5100 | 14450 | .1496 | .8504 | 448 | 5087 | 14457 | 441 | 5100 | 14450 | 9   | .13   |
| 20000 | .99  | .15 | .8500 | 450 | 5100 | 14450 | .1498 | .8502 | 449 | 5093 | 14453 | 446 | 5100 | 14450 | 5   | .03   |
| 20000 | 1.00 | .15 | .8500 | 450 | 5100 | 14450 | .1500 | .8500 | 450 | 5100 | 14450 | 450 | 5100 | 14450 | 0   | .00   |
| 20000 | 1.01 | .15 | .8500 | 450 | 5100 | 14450 | .1502 | .8498 | 451 | 5107 | 14447 | 455 | 5100 | 14450 | -5  | .03   |
| 20000 | 1.02 | .15 | .8500 | 450 | 5100 | 14450 | .1504 | .8496 | 453 | 5113 | 14444 | 459 | 5100 | 14450 | -9  | .13   |
| 20000 | 1.03 | .15 | .8500 | 450 | 5100 | 14450 | .1506 | .8494 | 454 | 5119 | 14440 | 464 | 5100 | 14450 | -14 | .29   |
| 20000 | 1.04 | .15 | .8500 | 450 | 5100 | 14450 | .1508 | .8492 | 455 | 5126 | 14437 | 468 | 5100 | 14450 | -18 | .51   |
| 20000 | 1.05 | .15 | .8500 | 450 | 5100 | 14450 | .1510 | .8490 | 456 | 5132 | 14434 | 473 | 5100 | 14450 | -23 | .80   |
| 20000 | 1.06 | .15 | .8500 | 450 | 5100 | 14450 | .1511 | .8489 | 458 | 5139 | 14431 | 477 | 5100 | 14450 | -27 | 1.15  |
| 20000 | 1.07 | .15 | .8500 | 450 | 5100 | 14450 | .1513 | .8487 | 459 | 5145 | 14427 | 482 | 5100 | 14450 | -32 | 1.56  |
| 20000 | 1.08 | .15 | .8500 | 450 | 5100 | 14450 | .1515 | .8485 | 460 | 5152 | 14424 | 486 | 5100 | 14450 | -36 | 2.04  |
| 20000 | 1.09 | .15 | .8500 | 450 | 5100 | 14450 | .1517 | .8483 | 461 | 5158 | 14421 | 491 | 5100 | 14450 | -41 | 2.57  |
| 20000 | 1.10 | .15 | .8500 | 450 | 5100 | 14450 | .1519 | .8481 | 463 | 5165 | 14418 | 495 | 5100 | 14450 | -45 | 3.16  |
| 20000 | 1.11 | .15 | .8500 | 450 | 5100 | 14450 | .1521 | .8479 | 464 | 5171 | 14414 | 500 | 5100 | 14450 | -50 | 3.82  |
| 20000 | 1.12 | .15 | .8500 | 450 | 5100 | 14450 | .1523 | .8477 | 465 | 5178 | 14411 | 504 | 5100 | 14450 | -54 | 4.53  |
| 20000 | 1.13 | .15 | .8500 | 450 | 5100 | 14450 | .1525 | .8475 | 466 | 5184 | 14408 | 509 | 5100 | 14450 | -59 | 5.30  |
| 20000 | 1.14 | .15 | .8500 | 450 | 5100 | 14450 | .1527 | .8473 | 468 | 5191 | 14405 | 513 | 5100 | 14450 | -63 | 6.13  |
| 20000 | 1.15 | .15 | .8500 | 450 | 5100 | 14450 | .1529 | .8471 | 469 | 5197 | 14401 | 518 | 5100 | 14450 | -68 | 7.02  |
| 20000 | 1.16 | .15 | .8500 | 450 | 5100 | 14450 | .1530 | .8470 | 470 | 5204 | 14398 | 522 | 5100 | 14450 | -72 | 7.97  |
| 20000 | 1.17 | .15 | .8500 | 450 | 5100 | 14450 | .1532 | .8468 | 471 | 5210 | 14395 | 527 | 5100 | 14450 | -77 | 8.97  |
| 20000 | 1.18 | .15 | .8500 | 450 | 5100 | 14450 | .1534 | .8466 | 473 | 5217 | 14392 | 531 | 5100 | 14450 | -81 | 10.03 |
| 20000 | 1.19 | .15 | .8500 | 450 | 5100 | 14450 | .1536 | .8464 | 474 | 5223 | 14388 | 536 | 5100 | 14450 | -86 | 11.14 |



|       |      |     |       |     |      |       |       |       |     |      |       |     |      |       |     |       |
|-------|------|-----|-------|-----|------|-------|-------|-------|-----|------|-------|-----|------|-------|-----|-------|
| 20000 | 1.20 | .15 | .8500 | 450 | 5100 | 14450 | .1538 | .8462 | 475 | 5229 | 14385 | 540 | 5100 | 14450 | -90 | 12.31 |
| 20000 | .80  | .20 | .8000 | 800 | 6400 | 12800 | .1935 | .8065 | 743 | 6194 | 12903 | 640 | 6400 | 12800 | 160 | 22.04 |
| 20000 | .81  | .20 | .8000 | 800 | 6400 | 12800 | .1939 | .8061 | 746 | 6204 | 12898 | 648 | 6400 | 12800 | 152 | 19.82 |
| 20000 | .82  | .20 | .8000 | 800 | 6400 | 12800 | .1942 | .8058 | 749 | 6214 | 12893 | 656 | 6400 | 12800 | 144 | 17.72 |
| 20000 | .83  | .20 | .8000 | 800 | 6400 | 12800 | .1945 | .8055 | 752 | 6225 | 12888 | 664 | 6400 | 12800 | 136 | 15.75 |
| 20000 | .84  | .20 | .8000 | 800 | 6400 | 12800 | .1948 | .8052 | 754 | 6235 | 12882 | 672 | 6400 | 12800 | 128 | 13.90 |
| 20000 | .85  | .20 | .8000 | 800 | 6400 | 12800 | .1952 | .8048 | 757 | 6245 | 12877 | 680 | 6400 | 12800 | 120 | 12.17 |
| 20000 | .86  | .20 | .8000 | 800 | 6400 | 12800 | .1955 | .8045 | 760 | 6256 | 12872 | 688 | 6400 | 12800 | 112 | 10.56 |
| 20000 | .87  | .20 | .8000 | 800 | 6400 | 12800 | .1958 | .8042 | 763 | 6266 | 12867 | 696 | 6400 | 12800 | 104 | 9.07  |
| 20000 | .88  | .20 | .8000 | 800 | 6400 | 12800 | .1961 | .8039 | 766 | 6277 | 12862 | 704 | 6400 | 12800 | 96  | 7.70  |
| 20000 | .89  | .20 | .8000 | 800 | 6400 | 12800 | .1965 | .8035 | 769 | 6287 | 12857 | 712 | 6400 | 12800 | 88  | 6.45  |
| 20000 | .90  | .20 | .8000 | 800 | 6400 | 12800 | .1968 | .8032 | 771 | 6297 | 12851 | 720 | 6400 | 12800 | 80  | 5.31  |
| 20000 | .91  | .20 | .8000 | 800 | 6400 | 12800 | .1971 | .8029 | 774 | 6308 | 12846 | 728 | 6400 | 12800 | 72  | 4.29  |
| 20000 | .92  | .20 | .8000 | 800 | 6400 | 12800 | .1974 | .8026 | 777 | 6318 | 12841 | 736 | 6400 | 12800 | 64  | 3.37  |
| 20000 | .93  | .20 | .8000 | 800 | 6400 | 12800 | .1978 | .8022 | 780 | 6328 | 12836 | 744 | 6400 | 12800 | 56  | 2.57  |
| 20000 | .94  | .20 | .8000 | 800 | 6400 | 12800 | .1981 | .8019 | 783 | 6338 | 12831 | 752 | 6400 | 12800 | 48  | 1.88  |
| 20000 | .95  | .20 | .8000 | 800 | 6400 | 12800 | .1984 | .8016 | 786 | 6349 | 12826 | 760 | 6400 | 12800 | 40  | 1.30  |
| 20000 | .96  | .20 | .8000 | 800 | 6400 | 12800 | .1987 | .8013 | 789 | 6359 | 12821 | 768 | 6400 | 12800 | 32  | .83   |
| 20000 | .97  | .20 | .8000 | 800 | 6400 | 12800 | .1990 | .8010 | 791 | 6369 | 12815 | 776 | 6400 | 12800 | 24  | .47   |
| 20000 | .98  | .20 | .8000 | 800 | 6400 | 12800 | .1994 | .8006 | 794 | 6380 | 12810 | 784 | 6400 | 12800 | 16  | .21   |
| 20000 | .99  | .20 | .8000 | 800 | 6400 | 12800 | .1997 | .8003 | 797 | 6390 | 12805 | 792 | 6400 | 12800 | 8   | .05   |
| 20000 | 1.00 | .20 | .8000 | 800 | 6400 | 12800 | .2000 | .8000 | 800 | 6400 | 12800 | 800 | 6400 | 12800 | 0   | .00   |
| 20000 | 1.01 | .20 | .8000 | 800 | 6400 | 12800 | .2003 | .7997 | 803 | 6410 | 12795 | 808 | 6400 | 12800 | -8  | .05   |
| 20000 | 1.02 | .20 | .8000 | 800 | 6400 | 12800 | .2006 | .7994 | 806 | 6420 | 12790 | 816 | 6400 | 12800 | -16 | .20   |
| 20000 | 1.03 | .20 | .8000 | 800 | 6400 | 12800 | .2010 | .7990 | 809 | 6431 | 12785 | 824 | 6400 | 12800 | -24 | .46   |
| 20000 | 1.04 | .20 | .8000 | 800 | 6400 | 12800 | .2013 | .7987 | 812 | 6441 | 12780 | 832 | 6400 | 12800 | -32 | .81   |
| 20000 | 1.05 | .20 | .8000 | 800 | 6400 | 12800 | .2016 | .7984 | 814 | 6451 | 12774 | 840 | 6400 | 12800 | -40 | 1.26  |
| 20000 | 1.06 | .20 | .8000 | 800 | 6400 | 12800 | .2019 | .7981 | 817 | 6461 | 12769 | 848 | 6400 | 12800 | -48 | 1.80  |
| 20000 | 1.07 | .20 | .8000 | 800 | 6400 | 12800 | .2022 | .7978 | 820 | 6471 | 12764 | 856 | 6400 | 12800 | -56 | 2.45  |
| 20000 | 1.08 | .20 | .8000 | 800 | 6400 | 12800 | .2026 | .7974 | 823 | 6482 | 12759 | 864 | 6400 | 12800 | -64 | 3.18  |
| 20000 | 1.09 | .20 | .8000 | 800 | 6400 | 12800 | .2029 | .7971 | 826 | 6492 | 12754 | 872 | 6400 | 12800 | -72 | 4.02  |
| 20000 | 1.10 | .20 | .8000 | 800 | 6400 | 12800 | .2032 | .7968 | 829 | 6502 | 12749 | 880 | 6400 | 12800 | -80 | 4.94  |
| 20000 | 1.11 | .20 | .8000 | 800 | 6400 | 12800 | .2035 | .7965 | 832 | 6512 | 12744 | 888 | 6400 | 12800 | -88 | 5.96  |

|       |      |     |       |      |      |       |       |       |      |      |       |      |      |       |      |       |
|-------|------|-----|-------|------|------|-------|-------|-------|------|------|-------|------|------|-------|------|-------|
| 20000 | 1.12 | .20 | .8000 | 800  | 6400 | 12800 | .2038 | .7962 | 835  | 6522 | 12739 | 896  | 6400 | 12800 | -96  | 7.07  |
| 20000 | 1.13 | .20 | .8000 | 800  | 6400 | 12800 | .2041 | .7959 | 838  | 6532 | 12734 | 904  | 6400 | 12800 | -104 | 8.26  |
| 20000 | 1.14 | .20 | .8000 | 800  | 6400 | 12800 | .2045 | .7955 | 841  | 6543 | 12729 | 912  | 6400 | 12800 | -112 | 9.55  |
| 20000 | 1.15 | .20 | .8000 | 800  | 6400 | 12800 | .2048 | .7952 | 844  | 6553 | 12724 | 920  | 6400 | 12800 | -120 | 10.92 |
| 20000 | 1.16 | .20 | .8000 | 800  | 6400 | 12800 | .2051 | .7949 | 847  | 6563 | 12719 | 928  | 6400 | 12800 | -128 | 12.39 |
| 20000 | 1.17 | .20 | .8000 | 800  | 6400 | 12800 | .2054 | .7946 | 850  | 6573 | 12714 | 936  | 6400 | 12800 | -136 | 13.93 |
| 20000 | 1.18 | .20 | .8000 | 800  | 6400 | 12800 | .2057 | .7943 | 852  | 6583 | 12708 | 944  | 6400 | 12800 | -144 | 15.57 |
| 20000 | 1.19 | .20 | .8000 | 800  | 6400 | 12800 | .2060 | .7940 | 855  | 6593 | 12703 | 952  | 6400 | 12800 | -152 | 17.29 |
| 20000 | 1.20 | .20 | .8000 | 800  | 6400 | 12800 | .2063 | .7937 | 858  | 6603 | 12698 | 960  | 6400 | 12800 | -160 | 19.09 |
| 20000 | .80  | .25 | .7500 | 1250 | 7500 | 11250 | .2405 | .7595 | 1142 | 7215 | 11392 | 1000 | 7500 | 11250 | 250  | 30.77 |
| 20000 | .81  | .25 | .7500 | 1250 | 7500 | 11250 | .2410 | .7590 | 1148 | 7230 | 11385 | 1013 | 7500 | 11250 | 238  | 27.65 |
| 20000 | .82  | .25 | .7500 | 1250 | 7500 | 11250 | .2415 | .7585 | 1153 | 7244 | 11378 | 1025 | 7500 | 11250 | 225  | 24.70 |
| 20000 | .83  | .25 | .7500 | 1250 | 7500 | 11250 | .2419 | .7581 | 1158 | 7258 | 11371 | 1038 | 7500 | 11250 | 213  | 21.93 |
| 20000 | .84  | .25 | .7500 | 1250 | 7500 | 11250 | .2424 | .7576 | 1164 | 7273 | 11364 | 1050 | 7500 | 11250 | 200  | 19.34 |
| 20000 | .85  | .25 | .7500 | 1250 | 7500 | 11250 | .2429 | .7571 | 1169 | 7287 | 11356 | 1063 | 7500 | 11250 | 188  | 16.92 |
| 20000 | .86  | .25 | .7500 | 1250 | 7500 | 11250 | .2434 | .7566 | 1174 | 7301 | 11349 | 1075 | 7500 | 11250 | 175  | 14.67 |
| 20000 | .87  | .25 | .7500 | 1250 | 7500 | 11250 | .2439 | .7561 | 1180 | 7316 | 11342 | 1088 | 7500 | 11250 | 163  | 12.59 |
| 20000 | .88  | .25 | .7500 | 1250 | 7500 | 11250 | .2443 | .7557 | 1185 | 7330 | 11335 | 1100 | 7500 | 11250 | 150  | 10.68 |
| 20000 | .89  | .25 | .7500 | 1250 | 7500 | 11250 | .2448 | .7552 | 1190 | 7344 | 11328 | 1113 | 7500 | 11250 | 138  | 8.93  |
| 20000 | .90  | .25 | .7500 | 1250 | 7500 | 11250 | .2453 | .7547 | 1196 | 7358 | 11321 | 1125 | 7500 | 11250 | 125  | 7.35  |
| 20000 | .91  | .25 | .7500 | 1250 | 7500 | 11250 | .2458 | .7542 | 1201 | 7373 | 11314 | 1138 | 7500 | 11250 | 113  | 5.93  |
| 20000 | .92  | .25 | .7500 | 1250 | 7500 | 11250 | .2462 | .7538 | 1207 | 7387 | 11307 | 1150 | 7500 | 11250 | 100  | 4.66  |
| 20000 | .93  | .25 | .7500 | 1250 | 7500 | 11250 | .2467 | .7533 | 1212 | 7401 | 11299 | 1163 | 7500 | 11250 | 88   | 3.55  |
| 20000 | .94  | .25 | .7500 | 1250 | 7500 | 11250 | .2472 | .7528 | 1217 | 7415 | 11292 | 1175 | 7500 | 11250 | 75   | 2.60  |
| 20000 | .95  | .25 | .7500 | 1250 | 7500 | 11250 | .2476 | .7524 | 1223 | 7429 | 11285 | 1188 | 7500 | 11250 | 63   | 1.80  |
| 20000 | .96  | .25 | .7500 | 1250 | 7500 | 11250 | .2481 | .7519 | 1228 | 7444 | 11278 | 1200 | 7500 | 11250 | 50   | 1.14  |
| 20000 | .97  | .25 | .7500 | 1250 | 7500 | 11250 | .2486 | .7514 | 1234 | 7458 | 11271 | 1213 | 7500 | 11250 | 38   | .64   |
| 20000 | .98  | .25 | .7500 | 1250 | 7500 | 11250 | .2491 | .7509 | 1239 | 7472 | 11264 | 1225 | 7500 | 11250 | 25   | .28   |
| 20000 | .99  | .25 | .7500 | 1250 | 7500 | 11250 | .2495 | .7505 | 1245 | 7486 | 11257 | 1238 | 7500 | 11250 | 13   | .07   |
| 20000 | 1.00 | .25 | .7500 | 1250 | 7500 | 11250 | .2500 | .7500 | 1250 | 7500 | 11250 | 1250 | 7500 | 11250 | 0    | .00   |
| 20000 | 1.01 | .25 | .7500 | 1250 | 7500 | 11250 | .2505 | .7495 | 1255 | 7514 | 11243 | 1263 | 7500 | 11250 | -13  | .07   |
| 20000 | 1.02 | .25 | .7500 | 1250 | 7500 | 11250 | .2509 | .7491 | 1261 | 7528 | 11236 | 1275 | 7500 | 11250 | -25  | .28   |
| 20000 | 1.03 | .25 | .7500 | 1250 | 7500 | 11250 | .2514 | .7486 | 1266 | 7542 | 11229 | 1288 | 7500 | 11250 | -38  | .62   |

|       |      |     |       |      |      |       |       |       |      |      |       |      |      |       |      |       |
|-------|------|-----|-------|------|------|-------|-------|-------|------|------|-------|------|------|-------|------|-------|
| 20000 | 1.04 | .25 | .7500 | 1250 | 7500 | 11250 | .2519 | .7481 | 1272 | 7556 | 11222 | 1300 | 7500 | 11250 | -50  | 1.11  |
| 20000 | 1.05 | .25 | .7500 | 1250 | 7500 | 11250 | .2523 | .7477 | 1277 | 7570 | 11215 | 1313 | 7500 | 11250 | -63  | 1.72  |
| 20000 | 1.06 | .25 | .7500 | 1250 | 7500 | 11250 | .2528 | .7472 | 1283 | 7584 | 11208 | 1325 | 7500 | 11250 | -75  | 2.47  |
| 20000 | 1.07 | .25 | .7500 | 1250 | 7500 | 11250 | .2533 | .7467 | 1288 | 7598 | 11201 | 1338 | 7500 | 11250 | -88  | 3.34  |
| 20000 | 1.08 | .25 | .7500 | 1250 | 7500 | 11250 | .2537 | .7463 | 1294 | 7612 | 11194 | 1350 | 7500 | 11250 | -100 | 4.35  |
| 20000 | 1.09 | .25 | .7500 | 1250 | 7500 | 11250 | .2542 | .7458 | 1300 | 7626 | 11187 | 1363 | 7500 | 11250 | -113 | 5.48  |
| 20000 | 1.10 | .25 | .7500 | 1250 | 7500 | 11250 | .2547 | .7453 | 1305 | 7640 | 11180 | 1375 | 7500 | 11250 | -125 | 6.73  |
| 20000 | 1.11 | .25 | .7500 | 1250 | 7500 | 11250 | .2551 | .7449 | 1311 | 7654 | 11173 | 1388 | 7500 | 11250 | -138 | 8.11  |
| 20000 | 1.12 | .25 | .7500 | 1250 | 7500 | 11250 | .2556 | .7444 | 1316 | 7667 | 11166 | 1400 | 7500 | 11250 | -150 | 9.62  |
| 20000 | 1.13 | .25 | .7500 | 1250 | 7500 | 11250 | .2560 | .7440 | 1322 | 7681 | 11159 | 1413 | 7500 | 11250 | -163 | 11.24 |
| 20000 | 1.14 | .25 | .7500 | 1250 | 7500 | 11250 | .2565 | .7435 | 1327 | 7695 | 11152 | 1425 | 7500 | 11250 | -175 | 12.98 |
| 20000 | 1.15 | .25 | .7500 | 1250 | 7500 | 11250 | .2570 | .7430 | 1333 | 7709 | 11146 | 1438 | 7500 | 11250 | -188 | 14.84 |
| 20000 | 1.16 | .25 | .7500 | 1250 | 7500 | 11250 | .2574 | .7426 | 1339 | 7723 | 11139 | 1450 | 7500 | 11250 | -200 | 16.81 |
| 20000 | 1.17 | .25 | .7500 | 1250 | 7500 | 11250 | .2579 | .7421 | 1344 | 7737 | 11132 | 1463 | 7500 | 11250 | -213 | 18.90 |
| 20000 | 1.18 | .25 | .7500 | 1250 | 7500 | 11250 | .2583 | .7417 | 1350 | 7750 | 11125 | 1475 | 7500 | 11250 | -225 | 21.10 |
| 20000 | 1.19 | .25 | .7500 | 1250 | 7500 | 11250 | .2588 | .7412 | 1355 | 7764 | 11118 | 1488 | 7500 | 11250 | -238 | 23.41 |
| 20000 | 1.20 | .25 | .7500 | 1250 | 7500 | 11250 | .2593 | .7407 | 1361 | 7778 | 11111 | 1500 | 7500 | 11250 | -250 | 25.83 |
| 20000 | .80  | .30 | .7000 | 1800 | 8400 | 9800  | .2872 | .7128 | 1620 | 8041 | 9980  | 1440 | 8400 | 9800  | 360  | 39.21 |
| 20000 | .81  | .30 | .7000 | 1800 | 8400 | 9800  | .2878 | .7122 | 1628 | 8059 | 9970  | 1458 | 8400 | 9800  | 342  | 35.19 |
| 20000 | .82  | .30 | .7000 | 1800 | 8400 | 9800  | .2885 | .7115 | 1637 | 8077 | 9961  | 1476 | 8400 | 9800  | 324  | 31.42 |
| 20000 | .83  | .30 | .7000 | 1800 | 8400 | 9800  | .2891 | .7109 | 1646 | 8095 | 9952  | 1494 | 8400 | 9800  | 306  | 27.87 |
| 20000 | .84  | .30 | .7000 | 1800 | 8400 | 9800  | .2898 | .7102 | 1655 | 8114 | 9943  | 1512 | 8400 | 9800  | 288  | 24.55 |
| 20000 | .85  | .30 | .7000 | 1800 | 8400 | 9800  | .2904 | .7096 | 1664 | 8132 | 9934  | 1530 | 8400 | 9800  | 270  | 21.47 |
| 20000 | .86  | .30 | .7000 | 1800 | 8400 | 9800  | .2911 | .7089 | 1673 | 8150 | 9925  | 1548 | 8400 | 9800  | 252  | 18.60 |
| 20000 | .87  | .30 | .7000 | 1800 | 8400 | 9800  | .2917 | .7083 | 1682 | 8168 | 9916  | 1566 | 8400 | 9800  | 234  | 15.95 |
| 20000 | .88  | .30 | .7000 | 1800 | 8400 | 9800  | .2924 | .7076 | 1691 | 8186 | 9907  | 1584 | 8400 | 9800  | 216  | 13.52 |
| 20000 | .89  | .30 | .7000 | 1800 | 8400 | 9800  | .2930 | .7070 | 1700 | 8204 | 9898  | 1602 | 8400 | 9800  | 198  | 11.30 |
| 20000 | .90  | .30 | .7000 | 1800 | 8400 | 9800  | .2936 | .7064 | 1709 | 8222 | 9889  | 1620 | 8400 | 9800  | 180  | 9.29  |
| 20000 | .91  | .30 | .7000 | 1800 | 8400 | 9800  | .2943 | .7057 | 1718 | 8240 | 9880  | 1638 | 8400 | 9800  | 162  | 7.49  |
| 20000 | .92  | .30 | .7000 | 1800 | 8400 | 9800  | .2949 | .7051 | 1727 | 8258 | 9871  | 1656 | 8400 | 9800  | 144  | 5.88  |
| 20000 | .93  | .30 | .7000 | 1800 | 8400 | 9800  | .2956 | .7044 | 1736 | 8276 | 9862  | 1674 | 8400 | 9800  | 126  | 4.48  |
| 20000 | .94  | .30 | .7000 | 1800 | 8400 | 9800  | .2962 | .7038 | 1745 | 8294 | 9853  | 1692 | 8400 | 9800  | 108  | 3.27  |
| 20000 | .95  | .30 | .7000 | 1800 | 8400 | 9800  | .2968 | .7032 | 1754 | 8311 | 9844  | 1710 | 8400 | 9800  | 90   | 2.26  |

|       |      |     |       |      |      |      |       |       |      |      |      |      |      |      |      |       |
|-------|------|-----|-------|------|------|------|-------|-------|------|------|------|------|------|------|------|-------|
| 20000 | .96  | .30 | .7000 | 1800 | 8400 | 9800 | .2975 | .7025 | 1763 | 8329 | 9835 | 1728 | 8400 | 9800 | 72   | 1.44  |
| 20000 | .97  | .30 | .7000 | 1800 | 8400 | 9800 | .2981 | .7019 | 1773 | 8347 | 9827 | 1746 | 8400 | 9800 | 54   | .81   |
| 20000 | .98  | .30 | .7000 | 1800 | 8400 | 9800 | .2987 | .7013 | 1782 | 8365 | 9818 | 1764 | 8400 | 9800 | 36   | .36   |
| 20000 | .99  | .30 | .7000 | 1800 | 8400 | 9800 | .2994 | .7006 | 1791 | 8382 | 9809 | 1782 | 8400 | 9800 | 18   | .09   |
| 20000 | 1.00 | .30 | .7000 | 1800 | 8400 | 9800 | .3000 | .7000 | 1800 | 8400 | 9800 | 1800 | 8400 | 9800 | 0    | .00   |
| 20000 | 1.01 | .30 | .7000 | 1800 | 8400 | 9800 | .3006 | .6994 | 1809 | 8418 | 9791 | 1818 | 8400 | 9800 | -18  | .09   |
| 20000 | 1.02 | .30 | .7000 | 1800 | 8400 | 9800 | .3013 | .6987 | 1818 | 8435 | 9782 | 1836 | 8400 | 9800 | -36  | .35   |
| 20000 | 1.03 | .30 | .7000 | 1800 | 8400 | 9800 | .3019 | .6981 | 1828 | 8453 | 9774 | 1854 | 8400 | 9800 | -54  | .78   |
| 20000 | 1.04 | .30 | .7000 | 1800 | 8400 | 9800 | .3025 | .6975 | 1837 | 8470 | 9765 | 1872 | 8400 | 9800 | -72  | 1.38  |
| 20000 | 1.05 | .30 | .7000 | 1800 | 8400 | 9800 | .3031 | .6969 | 1846 | 8488 | 9756 | 1890 | 8400 | 9800 | -90  | 2.15  |
| 20000 | 1.06 | .30 | .7000 | 1800 | 8400 | 9800 | .3038 | .6962 | 1855 | 8505 | 9747 | 1908 | 8400 | 9800 | -108 | 3.08  |
| 20000 | 1.07 | .30 | .7000 | 1800 | 8400 | 9800 | .3044 | .6956 | 1865 | 8523 | 9739 | 1926 | 8400 | 9800 | -126 | 4.17  |
| 20000 | 1.08 | .30 | .7000 | 1800 | 8400 | 9800 | .3050 | .6950 | 1874 | 8540 | 9730 | 1944 | 8400 | 9800 | -144 | 5.42  |
| 20000 | 1.09 | .30 | .7000 | 1800 | 8400 | 9800 | .3056 | .6944 | 1883 | 8557 | 9721 | 1962 | 8400 | 9800 | -162 | 6.83  |
| 20000 | 1.10 | .30 | .7000 | 1800 | 8400 | 9800 | .3062 | .6938 | 1893 | 8575 | 9713 | 1980 | 8400 | 9800 | -180 | 8.39  |
| 20000 | 1.11 | .30 | .7000 | 1800 | 8400 | 9800 | .3069 | .6931 | 1902 | 8592 | 9704 | 1998 | 8400 | 9800 | -198 | 10.10 |
| 20000 | 1.12 | .30 | .7000 | 1800 | 8400 | 9800 | .3075 | .6925 | 1911 | 8609 | 9695 | 2016 | 8400 | 9800 | -216 | 11.96 |
| 20000 | 1.13 | .30 | .7000 | 1800 | 8400 | 9800 | .3081 | .6919 | 1921 | 8627 | 9687 | 2034 | 8400 | 9800 | -234 | 13.97 |
| 20000 | 1.14 | .30 | .7000 | 1800 | 8400 | 9800 | .3087 | .6913 | 1930 | 8644 | 9678 | 2052 | 8400 | 9800 | -252 | 16.12 |
| 20000 | 1.15 | .30 | .7000 | 1800 | 8400 | 9800 | .3093 | .6907 | 1939 | 8661 | 9669 | 2070 | 8400 | 9800 | -270 | 18.42 |
| 20000 | 1.16 | .30 | .7000 | 1800 | 8400 | 9800 | .3099 | .6901 | 1949 | 8678 | 9661 | 2088 | 8400 | 9800 | -288 | 20.85 |
| 20000 | 1.17 | .30 | .7000 | 1800 | 8400 | 9800 | .3105 | .6895 | 1958 | 8695 | 9652 | 2106 | 8400 | 9800 | -306 | 23.43 |
| 20000 | 1.18 | .30 | .7000 | 1800 | 8400 | 9800 | .3112 | .6888 | 1968 | 8712 | 9644 | 2124 | 8400 | 9800 | -324 | 26.14 |
| 20000 | 1.19 | .30 | .7000 | 1800 | 8400 | 9800 | .3118 | .6882 | 1977 | 8730 | 9635 | 2142 | 8400 | 9800 | -342 | 28.99 |
| 20000 | 1.20 | .30 | .7000 | 1800 | 8400 | 9800 | .3124 | .6876 | 1987 | 8747 | 9627 | 2160 | 8400 | 9800 | -360 | 31.96 |
| 20000 | .80  | .35 | .6500 | 2450 | 9100 | 8450 | .3337 | .6663 | 2172 | 8676 | 8662 | 1960 | 9100 | 8450 | 490  | 46.70 |
| 20000 | .81  | .35 | .6500 | 2450 | 9100 | 8450 | .3345 | .6655 | 2186 | 8697 | 8651 | 1985 | 9100 | 8450 | 466  | 41.88 |
| 20000 | .82  | .35 | .6500 | 2450 | 9100 | 8450 | .3353 | .6647 | 2200 | 8719 | 8641 | 2009 | 9100 | 8450 | 441  | 37.36 |
| 20000 | .83  | .35 | .6500 | 2450 | 9100 | 8450 | .3362 | .6638 | 2213 | 8741 | 8630 | 2034 | 9100 | 8450 | 417  | 33.12 |
| 20000 | .84  | .35 | .6500 | 2450 | 9100 | 8450 | .3370 | .6630 | 2227 | 8762 | 8619 | 2058 | 9100 | 8450 | 392  | 29.15 |
| 20000 | .85  | .35 | .6500 | 2450 | 9100 | 8450 | .3378 | .6622 | 2241 | 8784 | 8608 | 2083 | 9100 | 8450 | 368  | 25.47 |
| 20000 | .86  | .35 | .6500 | 2450 | 9100 | 8450 | .3387 | .6613 | 2254 | 8805 | 8597 | 2107 | 9100 | 8450 | 343  | 22.05 |
| 20000 | .87  | .35 | .6500 | 2450 | 9100 | 8450 | .3395 | .6605 | 2268 | 8827 | 8587 | 2132 | 9100 | 8450 | 319  | 18.90 |

|       |      |     |       |      |      |      |       |       |      |      |      |      |      |      |      |       |
|-------|------|-----|-------|------|------|------|-------|-------|------|------|------|------|------|------|------|-------|
| 20000 | .88  | .35 | .6500 | 2450 | 9100 | 8450 | .3403 | .6597 | 2282 | 8848 | 8576 | 2156 | 9100 | 8450 | 294  | 16.00 |
| 20000 | .89  | .35 | .6500 | 2450 | 9100 | 8450 | .3411 | .6589 | 2296 | 8869 | 8565 | 2181 | 9100 | 8450 | 270  | 13.37 |
| 20000 | .90  | .35 | .6500 | 2450 | 9100 | 8450 | .3419 | .6581 | 2310 | 8890 | 8555 | 2205 | 9100 | 8450 | 245  | 10.98 |
| 20000 | .91  | .35 | .6500 | 2450 | 9100 | 8450 | .3428 | .6572 | 2324 | 8912 | 8544 | 2230 | 9100 | 8450 | 221  | 8.84  |
| 20000 | .92  | .35 | .6500 | 2450 | 9100 | 8450 | .3436 | .6564 | 2338 | 8933 | 8534 | 2254 | 9100 | 8450 | 196  | 6.94  |
| 20000 | .93  | .35 | .6500 | 2450 | 9100 | 8450 | .3444 | .6556 | 2352 | 8954 | 8523 | 2279 | 9100 | 8450 | 172  | 5.28  |
| 20000 | .94  | .35 | .6500 | 2450 | 9100 | 8450 | .3452 | .6548 | 2366 | 8975 | 8513 | 2303 | 9100 | 8450 | 147  | 3.86  |
| 20000 | .95  | .35 | .6500 | 2450 | 9100 | 8450 | .3460 | .6540 | 2380 | 8996 | 8502 | 2328 | 9100 | 8450 | 123  | 2.66  |
| 20000 | .96  | .35 | .6500 | 2450 | 9100 | 8450 | .3468 | .6532 | 2394 | 9017 | 8492 | 2352 | 9100 | 8450 | 98   | 1.70  |
| 20000 | .97  | .35 | .6500 | 2450 | 9100 | 8450 | .3476 | .6524 | 2408 | 9038 | 8481 | 2377 | 9100 | 8450 | 74   | .95   |
| 20000 | .98  | .35 | .6500 | 2450 | 9100 | 8450 | .3484 | .6516 | 2422 | 9058 | 8471 | 2401 | 9100 | 8450 | 49   | .42   |
| 20000 | .99  | .35 | .6500 | 2450 | 9100 | 8450 | .3492 | .6508 | 2436 | 9079 | 8460 | 2426 | 9100 | 8450 | 25   | .10   |
| 20000 | 1.00 | .35 | .6500 | 2450 | 9100 | 8450 | .3500 | .6500 | 2450 | 9100 | 8450 | 2450 | 9100 | 8450 | 0    | .00   |
| 20000 | 1.01 | .35 | .6500 | 2450 | 9100 | 8450 | .3508 | .6492 | 2464 | 9121 | 8440 | 2475 | 9100 | 8450 | -25  | .10   |
| 20000 | 1.02 | .35 | .6500 | 2450 | 9100 | 8450 | .3516 | .6484 | 2478 | 9141 | 8429 | 2499 | 9100 | 8450 | -49  | .41   |
| 20000 | 1.03 | .35 | .6500 | 2450 | 9100 | 8450 | .3524 | .6476 | 2493 | 9162 | 8419 | 2524 | 9100 | 8450 | -74  | .92   |
| 20000 | 1.04 | .35 | .6500 | 2450 | 9100 | 8450 | .3532 | .6468 | 2507 | 9182 | 8409 | 2548 | 9100 | 8450 | -98  | 1.62  |
| 20000 | 1.05 | .35 | .6500 | 2450 | 9100 | 8450 | .3540 | .6460 | 2521 | 9203 | 8399 | 2573 | 9100 | 8450 | -123 | 2.51  |
| 20000 | 1.06 | .35 | .6500 | 2450 | 9100 | 8450 | .3547 | .6453 | 2535 | 9223 | 8388 | 2597 | 9100 | 8450 | -147 | 3.60  |
| 20000 | 1.07 | .35 | .6500 | 2450 | 9100 | 8450 | .3555 | .6445 | 2550 | 9244 | 8378 | 2622 | 9100 | 8450 | -172 | 4.87  |
| 20000 | 1.08 | .35 | .6500 | 2450 | 9100 | 8450 | .3563 | .6437 | 2564 | 9264 | 8368 | 2646 | 9100 | 8450 | -196 | 6.33  |
| 20000 | 1.09 | .35 | .6500 | 2450 | 9100 | 8450 | .3571 | .6429 | 2578 | 9284 | 8358 | 2671 | 9100 | 8450 | -221 | 7.97  |
| 20000 | 1.10 | .35 | .6500 | 2450 | 9100 | 8450 | .3579 | .6421 | 2593 | 9305 | 8348 | 2695 | 9100 | 8450 | -245 | 9.78  |
| 20000 | 1.11 | .35 | .6500 | 2450 | 9100 | 8450 | .3586 | .6414 | 2607 | 9325 | 8338 | 2720 | 9100 | 8450 | -270 | 11.77 |
| 20000 | 1.12 | .35 | .6500 | 2450 | 9100 | 8450 | .3594 | .6406 | 2622 | 9345 | 8328 | 2744 | 9100 | 8450 | -294 | 13.93 |
| 20000 | 1.13 | .35 | .6500 | 2450 | 9100 | 8450 | .3602 | .6398 | 2636 | 9365 | 8318 | 2769 | 9100 | 8450 | -319 | 16.26 |
| 20000 | 1.14 | .35 | .6500 | 2450 | 9100 | 8450 | .3610 | .6390 | 2651 | 9385 | 8308 | 2793 | 9100 | 8450 | -343 | 18.75 |
| 20000 | 1.15 | .35 | .6500 | 2450 | 9100 | 8450 | .3617 | .6383 | 2665 | 9405 | 8298 | 2818 | 9100 | 8450 | -368 | 21.41 |
| 20000 | 1.16 | .35 | .6500 | 2450 | 9100 | 8450 | .3625 | .6375 | 2680 | 9425 | 8288 | 2842 | 9100 | 8450 | -392 | 24.23 |
| 20000 | 1.17 | .35 | .6500 | 2450 | 9100 | 8450 | .3633 | .6367 | 2694 | 9445 | 8278 | 2867 | 9100 | 8450 | -417 | 27.20 |
| 20000 | 1.18 | .35 | .6500 | 2450 | 9100 | 8450 | .3640 | .6360 | 2709 | 9465 | 8268 | 2891 | 9100 | 8450 | -441 | 30.33 |
| 20000 | 1.19 | .35 | .6500 | 2450 | 9100 | 8450 | .3648 | .6352 | 2723 | 9484 | 8258 | 2916 | 9100 | 8450 | -466 | 33.62 |
| 20000 | 1.20 | .35 | .6500 | 2450 | 9100 | 8450 | .3655 | .6345 | 2738 | 9504 | 8248 | 2940 | 9100 | 8450 | -490 | 37.05 |

|       |      |     |       |      |      |      |       |       |      |      |      |      |      |      |      |       |
|-------|------|-----|-------|------|------|------|-------|-------|------|------|------|------|------|------|------|-------|
| 20000 | .80  | .40 | .6000 | 3200 | 9600 | 7200 | .3802 | .6198 | 2798 | 9124 | 7438 | 2560 | 9600 | 7200 | 640  | 52.70 |
| 20000 | .81  | .40 | .6000 | 3200 | 9600 | 7200 | .3812 | .6188 | 2818 | 9149 | 7426 | 2592 | 9600 | 7200 | 608  | 47.23 |
| 20000 | .82  | .40 | .6000 | 3200 | 9600 | 7200 | .3822 | .6178 | 2838 | 9173 | 7414 | 2624 | 9600 | 7200 | 576  | 42.09 |
| 20000 | .83  | .40 | .6000 | 3200 | 9600 | 7200 | .3832 | .6168 | 2857 | 9197 | 7401 | 2656 | 9600 | 7200 | 544  | 37.29 |
| 20000 | .84  | .40 | .6000 | 3200 | 9600 | 7200 | .3842 | .6158 | 2877 | 9222 | 7389 | 2688 | 9600 | 7200 | 512  | 32.80 |
| 20000 | .85  | .40 | .6000 | 3200 | 9600 | 7200 | .3852 | .6148 | 2897 | 9246 | 7377 | 2720 | 9600 | 7200 | 480  | 28.63 |
| 20000 | .86  | .40 | .6000 | 3200 | 9600 | 7200 | .3863 | .6137 | 2917 | 9270 | 7365 | 2752 | 9600 | 7200 | 448  | 24.77 |
| 20000 | .87  | .40 | .6000 | 3200 | 9600 | 7200 | .3873 | .6127 | 2937 | 9294 | 7353 | 2784 | 9600 | 7200 | 416  | 21.21 |
| 20000 | .88  | .40 | .6000 | 3200 | 9600 | 7200 | .3883 | .6117 | 2957 | 9318 | 7341 | 2816 | 9600 | 7200 | 384  | 17.95 |
| 20000 | .89  | .40 | .6000 | 3200 | 9600 | 7200 | .3893 | .6107 | 2977 | 9342 | 7329 | 2848 | 9600 | 7200 | 352  | 14.98 |
| 20000 | .90  | .40 | .6000 | 3200 | 9600 | 7200 | .3902 | .6098 | 2997 | 9366 | 7317 | 2880 | 9600 | 7200 | 320  | 12.30 |
| 20000 | .91  | .40 | .6000 | 3200 | 9600 | 7200 | .3912 | .6088 | 3017 | 9390 | 7305 | 2912 | 9600 | 7200 | 288  | 9.90  |
| 20000 | .92  | .40 | .6000 | 3200 | 9600 | 7200 | .3922 | .6078 | 3037 | 9413 | 7293 | 2944 | 9600 | 7200 | 256  | 7.77  |
| 20000 | .93  | .40 | .6000 | 3200 | 9600 | 7200 | .3932 | .6068 | 3058 | 9437 | 7282 | 2976 | 9600 | 7200 | 224  | 5.91  |
| 20000 | .94  | .40 | .6000 | 3200 | 9600 | 7200 | .3942 | .6058 | 3078 | 9460 | 7270 | 3008 | 9600 | 7200 | 192  | 4.31  |
| 20000 | .95  | .40 | .6000 | 3200 | 9600 | 7200 | .3952 | .6048 | 3098 | 9484 | 7258 | 3040 | 9600 | 7200 | 160  | 2.97  |
| 20000 | .96  | .40 | .6000 | 3200 | 9600 | 7200 | .3961 | .6039 | 3118 | 9507 | 7246 | 3072 | 9600 | 7200 | 128  | 1.89  |
| 20000 | .97  | .40 | .6000 | 3200 | 9600 | 7200 | .3971 | .6029 | 3139 | 9531 | 7235 | 3104 | 9600 | 7200 | 96   | 1.06  |
| 20000 | .98  | .40 | .6000 | 3200 | 9600 | 7200 | .3981 | .6019 | 3159 | 9554 | 7223 | 3136 | 9600 | 7200 | 64   | .47   |
| 20000 | .99  | .40 | .6000 | 3200 | 9600 | 7200 | .3990 | .6010 | 3180 | 9577 | 7212 | 3168 | 9600 | 7200 | 32   | .12   |
| 20000 | 1.00 | .40 | .6000 | 3200 | 9600 | 7200 | .4000 | .6000 | 3200 | 9600 | 7200 | 3200 | 9600 | 7200 | 0    | .00   |
| 20000 | 1.01 | .40 | .6000 | 3200 | 9600 | 7200 | .4010 | .5990 | 3220 | 9623 | 7188 | 3232 | 9600 | 7200 | -32  | .11   |
| 20000 | 1.02 | .40 | .6000 | 3200 | 9600 | 7200 | .4019 | .5981 | 3241 | 9646 | 7177 | 3264 | 9600 | 7200 | -64  | .45   |
| 20000 | 1.03 | .40 | .6000 | 3200 | 9600 | 7200 | .4029 | .5971 | 3262 | 9669 | 7166 | 3296 | 9600 | 7200 | -96  | 1.02  |
| 20000 | 1.04 | .40 | .6000 | 3200 | 9600 | 7200 | .4038 | .5962 | 3282 | 9692 | 7154 | 3328 | 9600 | 7200 | -128 | 1.80  |
| 20000 | 1.05 | .40 | .6000 | 3200 | 9600 | 7200 | .4048 | .5952 | 3303 | 9714 | 7143 | 3360 | 9600 | 7200 | -160 | 2.79  |
| 20000 | 1.06 | .40 | .6000 | 3200 | 9600 | 7200 | .4057 | .5943 | 3324 | 9737 | 7132 | 3392 | 9600 | 7200 | -192 | 3.99  |
| 20000 | 1.07 | .40 | .6000 | 3200 | 9600 | 7200 | .4066 | .5934 | 3344 | 9759 | 7120 | 3424 | 9600 | 7200 | -224 | 5.40  |
| 20000 | 1.08 | .40 | .6000 | 3200 | 9600 | 7200 | .4076 | .5924 | 3365 | 9782 | 7109 | 3456 | 9600 | 7200 | -256 | 7.01  |
| 20000 | 1.09 | .40 | .6000 | 3200 | 9600 | 7200 | .4085 | .5915 | 3386 | 9804 | 7098 | 3488 | 9600 | 7200 | -288 | 8.82  |
| 20000 | 1.10 | .40 | .6000 | 3200 | 9600 | 7200 | .4094 | .5906 | 3407 | 9827 | 7087 | 3520 | 9600 | 7200 | -320 | 10.82 |
| 20000 | 1.11 | .40 | .6000 | 3200 | 9600 | 7200 | .4104 | .5896 | 3427 | 9849 | 7075 | 3552 | 9600 | 7200 | -352 | 13.01 |
| 20000 | 1.12 | .40 | .6000 | 3200 | 9600 | 7200 | .4113 | .5887 | 3448 | 9871 | 7064 | 3584 | 9600 | 7200 | -384 | 15.39 |

|       |      |     |       |      |      |      |       |       |      |       |      |      |      |      |      |       |
|-------|------|-----|-------|------|------|------|-------|-------|------|-------|------|------|------|------|------|-------|
| 20000 | 1.13 | .40 | .6000 | 3200 | 9600 | 7200 | .4122 | .5878 | 3469 | 9893  | 7053 | 3616 | 9600 | 7200 | -416 | 17.96 |
| 20000 | 1.14 | .40 | .6000 | 3200 | 9600 | 7200 | .4131 | .5869 | 3490 | 9915  | 7042 | 3648 | 9600 | 7200 | -448 | 20.70 |
| 20000 | 1.15 | .40 | .6000 | 3200 | 9600 | 7200 | .4141 | .5859 | 3511 | 9938  | 7031 | 3680 | 9600 | 7200 | -480 | 23.62 |
| 20000 | 1.16 | .40 | .6000 | 3200 | 9600 | 7200 | .4150 | .5850 | 3532 | 9959  | 7020 | 3712 | 9600 | 7200 | -512 | 26.72 |
| 20000 | 1.17 | .40 | .6000 | 3200 | 9600 | 7200 | .4159 | .5841 | 3553 | 9981  | 7009 | 3744 | 9600 | 7200 | -544 | 29.98 |
| 20000 | 1.18 | .40 | .6000 | 3200 | 9600 | 7200 | .4168 | .5832 | 3574 | 10003 | 6998 | 3776 | 9600 | 7200 | -576 | 33.41 |
| 20000 | 1.19 | .40 | .6000 | 3200 | 9600 | 7200 | .4177 | .5823 | 3596 | 10025 | 6988 | 3808 | 9600 | 7200 | -608 | 37.01 |
| 20000 | 1.20 | .40 | .6000 | 3200 | 9600 | 7200 | .4186 | .5814 | 3617 | 10047 | 6977 | 3840 | 9600 | 7200 | -640 | 40.77 |
| 20000 | .80  | .45 | .5500 | 4050 | 9900 | 6050 | .4268 | .5732 | 3495 | 9389  | 6305 | 3240 | 9900 | 6050 | 810  | 56.78 |
| 20000 | .81  | .45 | .5500 | 4050 | 9900 | 6050 | .4280 | .5720 | 3523 | 9416  | 6292 | 3281 | 9900 | 6050 | 770  | 50.85 |
| 20000 | .82  | .45 | .5500 | 4050 | 9900 | 6050 | .4292 | .5708 | 3550 | 9442  | 6279 | 3321 | 9900 | 6050 | 729  | 45.29 |
| 20000 | .83  | .45 | .5500 | 4050 | 9900 | 6050 | .4304 | .5696 | 3577 | 9469  | 6266 | 3362 | 9900 | 6050 | 689  | 40.09 |
| 20000 | .84  | .45 | .5500 | 4050 | 9900 | 6050 | .4316 | .5684 | 3605 | 9495  | 6253 | 3402 | 9900 | 6050 | 648  | 35.24 |
| 20000 | .85  | .45 | .5500 | 4050 | 9900 | 6050 | .4328 | .5672 | 3632 | 9521  | 6240 | 3443 | 9900 | 6050 | 608  | 30.74 |
| 20000 | .86  | .45 | .5500 | 4050 | 9900 | 6050 | .4340 | .5660 | 3660 | 9547  | 6227 | 3483 | 9900 | 6050 | 567  | 26.57 |
| 20000 | .87  | .45 | .5500 | 4050 | 9900 | 6050 | .4351 | .5649 | 3687 | 9573  | 6214 | 3524 | 9900 | 6050 | 527  | 22.74 |
| 20000 | .88  | .45 | .5500 | 4050 | 9900 | 6050 | .4363 | .5637 | 3715 | 9599  | 6201 | 3564 | 9900 | 6050 | 486  | 19.23 |
| 20000 | .89  | .45 | .5500 | 4050 | 9900 | 6050 | .4375 | .5625 | 3742 | 9624  | 6188 | 3605 | 9900 | 6050 | 446  | 16.04 |
| 20000 | .90  | .45 | .5500 | 4050 | 9900 | 6050 | .4386 | .5614 | 3770 | 9650  | 6175 | 3645 | 9900 | 6050 | 405  | 13.16 |
| 20000 | .91  | .45 | .5500 | 4050 | 9900 | 6050 | .4398 | .5602 | 3798 | 9675  | 6162 | 3686 | 9900 | 6050 | 365  | 10.58 |
| 20000 | .92  | .45 | .5500 | 4050 | 9900 | 6050 | .4409 | .5591 | 3826 | 9701  | 6150 | 3726 | 9900 | 6050 | 324  | 8.30  |
| 20000 | .93  | .45 | .5500 | 4050 | 9900 | 6050 | .4421 | .5579 | 3853 | 9726  | 6137 | 3767 | 9900 | 6050 | 284  | 6.31  |
| 20000 | .94  | .45 | .5500 | 4050 | 9900 | 6050 | .4432 | .5568 | 3881 | 9751  | 6124 | 3807 | 9900 | 6050 | 243  | 4.60  |
| 20000 | .95  | .45 | .5500 | 4050 | 9900 | 6050 | .4444 | .5556 | 3909 | 9776  | 6112 | 3848 | 9900 | 6050 | 203  | 3.17  |
| 20000 | .96  | .45 | .5500 | 4050 | 9900 | 6050 | .4455 | .5545 | 3937 | 9801  | 6099 | 3888 | 9900 | 6050 | 162  | 2.02  |
| 20000 | .97  | .45 | .5500 | 4050 | 9900 | 6050 | .4466 | .5534 | 3965 | 9826  | 6087 | 3929 | 9900 | 6050 | 122  | 1.13  |
| 20000 | .98  | .45 | .5500 | 4050 | 9900 | 6050 | .4478 | .5522 | 3994 | 9851  | 6075 | 3969 | 9900 | 6050 | 81   | .50   |
| 20000 | .99  | .45 | .5500 | 4050 | 9900 | 6050 | .4489 | .5511 | 4022 | 9875  | 6062 | 4010 | 9900 | 6050 | 41   | .12   |
| 20000 | 1.00 | .45 | .5500 | 4050 | 9900 | 6050 | .4500 | .5500 | 4050 | 9900  | 6050 | 4050 | 9900 | 6050 | 0    | .00   |
| 20000 | 1.01 | .45 | .5500 | 4050 | 9900 | 6050 | .4511 | .5489 | 4078 | 9924  | 6038 | 4091 | 9900 | 6050 | -41  | .12   |
| 20000 | 1.02 | .45 | .5500 | 4050 | 9900 | 6050 | .4522 | .5478 | 4107 | 9949  | 6026 | 4131 | 9900 | 6050 | -81  | .48   |
| 20000 | 1.03 | .45 | .5500 | 4050 | 9900 | 6050 | .4533 | .5467 | 4135 | 9973  | 6013 | 4172 | 9900 | 6050 | -122 | 1.08  |
| 20000 | 1.04 | .45 | .5500 | 4050 | 9900 | 6050 | .4544 | .5456 | 4163 | 9997  | 6001 | 4212 | 9900 | 6050 | -162 | 1.91  |

|       |      |     |       |      |       |      |       |       |      |       |      |      |       |      |      |       |
|-------|------|-----|-------|------|-------|------|-------|-------|------|-------|------|------|-------|------|------|-------|
| 20000 | 1.05 | .45 | .5500 | 4050 | 9900  | 6050 | .4555 | .5445 | 4192 | 10021 | 5989 | 4253 | 9900  | 6050 | -203 | 2.96  |
| 20000 | 1.06 | .45 | .5500 | 4050 | 9900  | 6050 | .4566 | .5434 | 4220 | 10045 | 5977 | 4293 | 9900  | 6050 | -243 | 4.23  |
| 20000 | 1.07 | .45 | .5500 | 4050 | 9900  | 6050 | .4577 | .5423 | 4249 | 10069 | 5965 | 4334 | 9900  | 6050 | -284 | 5.72  |
| 20000 | 1.08 | .45 | .5500 | 4050 | 9900  | 6050 | .4588 | .5412 | 4278 | 10093 | 5954 | 4374 | 9900  | 6050 | -324 | 7.42  |
| 20000 | 1.09 | .45 | .5500 | 4050 | 9900  | 6050 | .4598 | .5402 | 4306 | 10117 | 5942 | 4415 | 9900  | 6050 | -365 | 9.33  |
| 20000 | 1.10 | .45 | .5500 | 4050 | 9900  | 6050 | .4609 | .5391 | 4335 | 10140 | 5930 | 4455 | 9900  | 6050 | -405 | 11.45 |
| 20000 | 1.11 | .45 | .5500 | 4050 | 9900  | 6050 | .4620 | .5380 | 4364 | 10164 | 5918 | 4496 | 9900  | 6050 | -446 | 13.76 |
| 20000 | 1.12 | .45 | .5500 | 4050 | 9900  | 6050 | .4630 | .5370 | 4392 | 10187 | 5906 | 4536 | 9900  | 6050 | -486 | 16.27 |
| 20000 | 1.13 | .45 | .5500 | 4050 | 9900  | 6050 | .4641 | .5359 | 4421 | 10210 | 5895 | 4577 | 9900  | 6050 | -527 | 18.97 |
| 20000 | 1.14 | .45 | .5500 | 4050 | 9900  | 6050 | .4652 | .5348 | 4450 | 10234 | 5883 | 4617 | 9900  | 6050 | -567 | 21.85 |
| 20000 | 1.15 | .45 | .5500 | 4050 | 9900  | 6050 | .4662 | .5338 | 4479 | 10257 | 5872 | 4658 | 9900  | 6050 | -608 | 24.92 |
| 20000 | 1.16 | .45 | .5500 | 4050 | 9900  | 6050 | .4673 | .5327 | 4508 | 10280 | 5860 | 4698 | 9900  | 6050 | -648 | 28.18 |
| 20000 | 1.17 | .45 | .5500 | 4050 | 9900  | 6050 | .4683 | .5317 | 4537 | 10303 | 5849 | 4739 | 9900  | 6050 | -689 | 31.60 |
| 20000 | 1.18 | .45 | .5500 | 4050 | 9900  | 6050 | .4693 | .5307 | 4566 | 10326 | 5837 | 4779 | 9900  | 6050 | -729 | 35.21 |
| 20000 | 1.19 | .45 | .5500 | 4050 | 9900  | 6050 | .4704 | .5296 | 4595 | 10348 | 5826 | 4820 | 9900  | 6050 | -770 | 38.98 |
| 20000 | 1.20 | .45 | .5500 | 4050 | 9900  | 6050 | .4714 | .5286 | 4625 | 10371 | 5815 | 4860 | 9900  | 6050 | -810 | 42.92 |
| 20000 | .80  | .50 | .5000 | 5000 | 10000 | 5000 | .4737 | .5263 | 4263 | 9474  | 5263 | 4000 | 10000 | 5000 | 1000 | 58.64 |
| 20000 | .81  | .50 | .5000 | 5000 | 10000 | 5000 | .4751 | .5249 | 4299 | 9501  | 5249 | 4050 | 10000 | 5000 | 950  | 52.48 |
| 20000 | .82  | .50 | .5000 | 5000 | 10000 | 5000 | .4764 | .5236 | 4336 | 9529  | 5236 | 4100 | 10000 | 5000 | 900  | 46.71 |
| 20000 | .83  | .50 | .5000 | 5000 | 10000 | 5000 | .4778 | .5222 | 4372 | 9556  | 5222 | 4150 | 10000 | 5000 | 850  | 41.31 |
| 20000 | .84  | .50 | .5000 | 5000 | 10000 | 5000 | .4792 | .5208 | 4408 | 9583  | 5208 | 4200 | 10000 | 5000 | 800  | 36.29 |
| 20000 | .85  | .50 | .5000 | 5000 | 10000 | 5000 | .4805 | .5195 | 4445 | 9610  | 5195 | 4250 | 10000 | 5000 | 750  | 31.64 |
| 20000 | .86  | .50 | .5000 | 5000 | 10000 | 5000 | .4819 | .5181 | 4481 | 9637  | 5181 | 4300 | 10000 | 5000 | 700  | 27.34 |
| 20000 | .87  | .50 | .5000 | 5000 | 10000 | 5000 | .4832 | .5168 | 4518 | 9664  | 5168 | 4350 | 10000 | 5000 | 650  | 23.38 |
| 20000 | .88  | .50 | .5000 | 5000 | 10000 | 5000 | .4845 | .5155 | 4555 | 9691  | 5155 | 4400 | 10000 | 5000 | 600  | 19.76 |
| 20000 | .89  | .50 | .5000 | 5000 | 10000 | 5000 | .4859 | .5141 | 4591 | 9717  | 5141 | 4450 | 10000 | 5000 | 550  | 16.47 |
| 20000 | .90  | .50 | .5000 | 5000 | 10000 | 5000 | .4872 | .5128 | 4628 | 9744  | 5128 | 4500 | 10000 | 5000 | 500  | 13.50 |
| 20000 | .91  | .50 | .5000 | 5000 | 10000 | 5000 | .4885 | .5115 | 4665 | 9770  | 5115 | 4550 | 10000 | 5000 | 450  | 10.85 |
| 20000 | .92  | .50 | .5000 | 5000 | 10000 | 5000 | .4898 | .5102 | 4702 | 9796  | 5102 | 4600 | 10000 | 5000 | 400  | 8.51  |
| 20000 | .93  | .50 | .5000 | 5000 | 10000 | 5000 | .4911 | .5089 | 4739 | 9822  | 5089 | 4650 | 10000 | 5000 | 350  | 6.46  |
| 20000 | .94  | .50 | .5000 | 5000 | 10000 | 5000 | .4924 | .5076 | 4776 | 9848  | 5076 | 4700 | 10000 | 5000 | 300  | 4.71  |
| 20000 | .95  | .50 | .5000 | 5000 | 10000 | 5000 | .4937 | .5063 | 4813 | 9873  | 5063 | 4750 | 10000 | 5000 | 250  | 3.25  |
| 20000 | .96  | .50 | .5000 | 5000 | 10000 | 5000 | .4949 | .5051 | 4851 | 9899  | 5051 | 4800 | 10000 | 5000 | 200  | 2.06  |



|       |      |     |       |      |       |      |       |       |      |       |      |      |       |      |       |       |
|-------|------|-----|-------|------|-------|------|-------|-------|------|-------|------|------|-------|------|-------|-------|
| 20000 | .97  | .50 | .5000 | 5000 | 10000 | 5000 | .4962 | .5038 | 4888 | 9924  | 5038 | 4850 | 10000 | 5000 | 150   | 1.15  |
| 20000 | .98  | .50 | .5000 | 5000 | 10000 | 5000 | .4975 | .5025 | 4925 | 9950  | 5025 | 4900 | 10000 | 5000 | 100   | .51   |
| 20000 | .99  | .50 | .5000 | 5000 | 10000 | 5000 | .4987 | .5013 | 4963 | 9975  | 5013 | 4950 | 10000 | 5000 | 50    | .13   |
| 20000 | 1.00 | .50 | .5000 | 5000 | 10000 | 5000 | .5000 | .5000 | 5000 | 10000 | 5000 | 5000 | 10000 | 5000 | 0     | .00   |
| 20000 | 1.01 | .50 | .5000 | 5000 | 10000 | 5000 | .5012 | .4988 | 5038 | 10025 | 4988 | 5050 | 10000 | 5000 | -50   | .12   |
| 20000 | 1.02 | .50 | .5000 | 5000 | 10000 | 5000 | .5025 | .4975 | 5075 | 10050 | 4975 | 5100 | 10000 | 5000 | -100  | .49   |
| 20000 | 1.03 | .50 | .5000 | 5000 | 10000 | 5000 | .5037 | .4963 | 5113 | 10074 | 4963 | 5150 | 10000 | 5000 | -150  | 1.10  |
| 20000 | 1.04 | .50 | .5000 | 5000 | 10000 | 5000 | .5050 | .4950 | 5150 | 10099 | 4950 | 5200 | 10000 | 5000 | -200  | 1.94  |
| 20000 | 1.05 | .50 | .5000 | 5000 | 10000 | 5000 | .5062 | .4938 | 5188 | 10123 | 4938 | 5250 | 10000 | 5000 | -250  | 3.01  |
| 20000 | 1.06 | .50 | .5000 | 5000 | 10000 | 5000 | .5074 | .4926 | 5226 | 10148 | 4926 | 5300 | 10000 | 5000 | -300  | 4.31  |
| 20000 | 1.07 | .50 | .5000 | 5000 | 10000 | 5000 | .5086 | .4914 | 5264 | 10172 | 4914 | 5350 | 10000 | 5000 | -350  | 5.82  |
| 20000 | 1.08 | .50 | .5000 | 5000 | 10000 | 5000 | .5098 | .4902 | 5302 | 10196 | 4902 | 5400 | 10000 | 5000 | -400  | 7.54  |
| 20000 | 1.09 | .50 | .5000 | 5000 | 10000 | 5000 | .5110 | .4890 | 5340 | 10220 | 4890 | 5450 | 10000 | 5000 | -450  | 9.48  |
| 20000 | 1.10 | .50 | .5000 | 5000 | 10000 | 5000 | .5122 | .4878 | 5378 | 10244 | 4878 | 5500 | 10000 | 5000 | -500  | 11.62 |
| 20000 | 1.11 | .50 | .5000 | 5000 | 10000 | 5000 | .5134 | .4866 | 5416 | 10268 | 4866 | 5550 | 10000 | 5000 | -550  | 13.96 |
| 20000 | 1.12 | .50 | .5000 | 5000 | 10000 | 5000 | .5146 | .4854 | 5454 | 10291 | 4854 | 5600 | 10000 | 5000 | -600  | 16.50 |
| 20000 | 1.13 | .50 | .5000 | 5000 | 10000 | 5000 | .5157 | .4843 | 5493 | 10315 | 4843 | 5650 | 10000 | 5000 | -650  | 19.23 |
| 20000 | 1.14 | .50 | .5000 | 5000 | 10000 | 5000 | .5169 | .4831 | 5531 | 10338 | 4831 | 5700 | 10000 | 5000 | -700  | 22.15 |
| 20000 | 1.15 | .50 | .5000 | 5000 | 10000 | 5000 | .5181 | .4819 | 5569 | 10361 | 4819 | 5750 | 10000 | 5000 | -750  | 25.25 |
| 20000 | 1.16 | .50 | .5000 | 5000 | 10000 | 5000 | .5192 | .4808 | 5608 | 10385 | 4808 | 5800 | 10000 | 5000 | -800  | 28.53 |
| 20000 | 1.17 | .50 | .5000 | 5000 | 10000 | 5000 | .5204 | .4796 | 5646 | 10408 | 4796 | 5850 | 10000 | 5000 | -850  | 31.99 |
| 20000 | 1.18 | .50 | .5000 | 5000 | 10000 | 5000 | .5215 | .4785 | 5685 | 10431 | 4785 | 5900 | 10000 | 5000 | -900  | 35.62 |
| 20000 | 1.19 | .50 | .5000 | 5000 | 10000 | 5000 | .5227 | .4773 | 5723 | 10453 | 4773 | 5950 | 10000 | 5000 | -950  | 39.42 |
| 20000 | 1.20 | .50 | .5000 | 5000 | 10000 | 5000 | .5238 | .4762 | 5762 | 10476 | 4762 | 6000 | 10000 | 5000 | -1000 | 43.39 |
| 20000 | .80  | .55 | .4500 | 6050 | 9900  | 4050 | .5210 | .4790 | 5101 | 9378  | 4311 | 4840 | 9900  | 4050 | 1210  | 58.12 |
| 20000 | .81  | .55 | .4500 | 6050 | 9900  | 4050 | .5226 | .4774 | 5147 | 9406  | 4297 | 4901 | 9900  | 4050 | 1150  | 51.98 |
| 20000 | .82  | .55 | .4500 | 6050 | 9900  | 4050 | .5241 | .4759 | 5194 | 9434  | 4283 | 4961 | 9900  | 4050 | 1089  | 46.23 |
| 20000 | .83  | .55 | .4500 | 6050 | 9900  | 4050 | .5256 | .4744 | 5241 | 9461  | 4270 | 5022 | 9900  | 4050 | 1029  | 40.87 |
| 20000 | .84  | .55 | .4500 | 6050 | 9900  | 4050 | .5271 | .4729 | 5288 | 9488  | 4256 | 5082 | 9900  | 4050 | 968   | 35.88 |
| 20000 | .85  | .55 | .4500 | 6050 | 9900  | 4050 | .5286 | .4714 | 5335 | 9515  | 4243 | 5143 | 9900  | 4050 | 908   | 31.26 |
| 20000 | .86  | .55 | .4500 | 6050 | 9900  | 4050 | .5301 | .4699 | 5382 | 9542  | 4229 | 5203 | 9900  | 4050 | 847   | 26.99 |
| 20000 | .87  | .55 | .4500 | 6050 | 9900  | 4050 | .5316 | .4684 | 5429 | 9568  | 4216 | 5264 | 9900  | 4050 | 787   | 23.07 |
| 20000 | .88  | .55 | .4500 | 6050 | 9900  | 4050 | .5330 | .4670 | 5477 | 9595  | 4203 | 5324 | 9900  | 4050 | 726   | 19.49 |

|       |      |     |       |      |      |      |       |       |      |       |      |      |      |      |       |       |
|-------|------|-----|-------|------|------|------|-------|-------|------|-------|------|------|------|------|-------|-------|
| 20000 | .89  | .55 | .4500 | 6050 | 9900 | 4050 | .5345 | .4655 | 5524 | 9621  | 4189 | 5385 | 9900 | 4050 | 666   | 16.24 |
| 20000 | .90  | .55 | .4500 | 6050 | 9900 | 4050 | .5360 | .4640 | 5571 | 9647  | 4176 | 5445 | 9900 | 4050 | 605   | 13.30 |
| 20000 | .91  | .55 | .4500 | 6050 | 9900 | 4050 | .5374 | .4626 | 5619 | 9673  | 4163 | 5506 | 9900 | 4050 | 545   | 10.68 |
| 20000 | .92  | .55 | .4500 | 6050 | 9900 | 4050 | .5388 | .4612 | 5666 | 9699  | 4150 | 5566 | 9900 | 4050 | 484   | 8.37  |
| 20000 | .93  | .55 | .4500 | 6050 | 9900 | 4050 | .5403 | .4597 | 5714 | 9725  | 4138 | 5627 | 9900 | 4050 | 424   | 6.36  |
| 20000 | .94  | .55 | .4500 | 6050 | 9900 | 4050 | .5417 | .4583 | 5762 | 9750  | 4125 | 5687 | 9900 | 4050 | 363   | 4.63  |
| 20000 | .95  | .55 | .4500 | 6050 | 9900 | 4050 | .5431 | .4569 | 5810 | 9776  | 4112 | 5748 | 9900 | 4050 | 303   | 3.19  |
| 20000 | .96  | .55 | .4500 | 6050 | 9900 | 4050 | .5445 | .4555 | 5858 | 9801  | 4100 | 5808 | 9900 | 4050 | 242   | 2.02  |
| 20000 | .97  | .55 | .4500 | 6050 | 9900 | 4050 | .5459 | .4541 | 5906 | 9826  | 4087 | 5869 | 9900 | 4050 | 182   | 1.13  |
| 20000 | .98  | .55 | .4500 | 6050 | 9900 | 4050 | .5473 | .4527 | 5954 | 9851  | 4075 | 5929 | 9900 | 4050 | 121   | .50   |
| 20000 | .99  | .55 | .4500 | 6050 | 9900 | 4050 | .5486 | .4514 | 6002 | 9875  | 4062 | 5990 | 9900 | 4050 | 61    | .12   |
| 20000 | 1.00 | .55 | .4500 | 6050 | 9900 | 4050 | .5500 | .4500 | 6050 | 9900  | 4050 | 6050 | 9900 | 4050 | 0     | .00   |
| 20000 | 1.01 | .55 | .4500 | 6050 | 9900 | 4050 | .5514 | .4486 | 6098 | 9924  | 4038 | 6111 | 9900 | 4050 | -61   | .12   |
| 20000 | 1.02 | .55 | .4500 | 6050 | 9900 | 4050 | .5527 | .4473 | 6147 | 9949  | 4026 | 6171 | 9900 | 4050 | -121  | .48   |
| 20000 | 1.03 | .55 | .4500 | 6050 | 9900 | 4050 | .5540 | .4460 | 6195 | 9973  | 4014 | 6232 | 9900 | 4050 | -182  | 1.08  |
| 20000 | 1.04 | .55 | .4500 | 6050 | 9900 | 4050 | .5554 | .4446 | 6244 | 9997  | 4002 | 6292 | 9900 | 4050 | -242  | 1.90  |
| 20000 | 1.05 | .55 | .4500 | 6050 | 9900 | 4050 | .5567 | .4433 | 6292 | 10021 | 3990 | 6353 | 9900 | 4050 | -303  | 2.94  |
| 20000 | 1.06 | .55 | .4500 | 6050 | 9900 | 4050 | .5580 | .4420 | 6341 | 10044 | 3978 | 6413 | 9900 | 4050 | -363  | 4.21  |
| 20000 | 1.07 | .55 | .4500 | 6050 | 9900 | 4050 | .5593 | .4407 | 6390 | 10068 | 3966 | 6474 | 9900 | 4050 | -424  | 5.68  |
| 20000 | 1.08 | .55 | .4500 | 6050 | 9900 | 4050 | .5606 | .4394 | 6438 | 10091 | 3954 | 6534 | 9900 | 4050 | -484  | 7.37  |
| 20000 | 1.09 | .55 | .4500 | 6050 | 9900 | 4050 | .5619 | .4381 | 6487 | 10115 | 3943 | 6595 | 9900 | 4050 | -545  | 9.25  |
| 20000 | 1.10 | .55 | .4500 | 6050 | 9900 | 4050 | .5632 | .4368 | 6536 | 10138 | 3931 | 6655 | 9900 | 4050 | -605  | 11.34 |
| 20000 | 1.11 | .55 | .4500 | 6050 | 9900 | 4050 | .5645 | .4355 | 6585 | 10161 | 3920 | 6716 | 9900 | 4050 | -666  | 13.62 |
| 20000 | 1.12 | .55 | .4500 | 6050 | 9900 | 4050 | .5658 | .4342 | 6634 | 10184 | 3908 | 6776 | 9900 | 4050 | -726  | 16.09 |
| 20000 | 1.13 | .55 | .4500 | 6050 | 9900 | 4050 | .5670 | .4330 | 6683 | 10206 | 3897 | 6837 | 9900 | 4050 | -787  | 18.74 |
| 20000 | 1.14 | .55 | .4500 | 6050 | 9900 | 4050 | .5683 | .4317 | 6732 | 10229 | 3885 | 6897 | 9900 | 4050 | -847  | 21.58 |
| 20000 | 1.15 | .55 | .4500 | 6050 | 9900 | 4050 | .5695 | .4305 | 6782 | 10252 | 3874 | 6958 | 9900 | 4050 | -908  | 24.59 |
| 20000 | 1.16 | .55 | .4500 | 6050 | 9900 | 4050 | .5708 | .4292 | 6831 | 10274 | 3863 | 7018 | 9900 | 4050 | -968  | 27.78 |
| 20000 | 1.17 | .55 | .4500 | 6050 | 9900 | 4050 | .5720 | .4280 | 6880 | 10296 | 3852 | 7079 | 9900 | 4050 | -1029 | 31.13 |
| 20000 | 1.18 | .55 | .4500 | 6050 | 9900 | 4050 | .5732 | .4268 | 6930 | 10318 | 3841 | 7139 | 9900 | 4050 | -1089 | 34.65 |
| 20000 | 1.19 | .55 | .4500 | 6050 | 9900 | 4050 | .5745 | .4255 | 6979 | 10340 | 3830 | 7200 | 9900 | 4050 | -1150 | 38.34 |
| 20000 | 1.20 | .55 | .4500 | 6050 | 9900 | 4050 | .5757 | .4243 | 7029 | 10362 | 3819 | 7260 | 9900 | 4050 | -1210 | 42.18 |
| 20000 | .80  | .60 | .4000 | 7200 | 9600 | 3200 | .5690 | .4310 | 6008 | 9103  | 3448 | 5760 | 9600 | 3200 | 1440  | 55.22 |

|       |      |     |       |      |      |      |       |       |      |      |      |      |      |      |      |       |
|-------|------|-----|-------|------|------|------|-------|-------|------|------|------|------|------|------|------|-------|
| 20000 | .81  | .60 | .4000 | 7200 | 9600 | 3200 | .5706 | .4294 | 6067 | 9130 | 3435 | 5832 | 9600 | 3200 | 1368 | 49.35 |
| 20000 | .82  | .60 | .4000 | 7200 | 9600 | 3200 | .5723 | .4277 | 6126 | 9157 | 3422 | 5904 | 9600 | 3200 | 1296 | 43.87 |
| 20000 | .83  | .60 | .4000 | 7200 | 9600 | 3200 | .5739 | .4261 | 6185 | 9183 | 3409 | 5976 | 9600 | 3200 | 1224 | 38.76 |
| 20000 | .84  | .60 | .4000 | 7200 | 9600 | 3200 | .5756 | .4244 | 6244 | 9209 | 3396 | 6048 | 9600 | 3200 | 1152 | 34.01 |
| 20000 | .85  | .60 | .4000 | 7200 | 9600 | 3200 | .5772 | .4228 | 6303 | 9235 | 3383 | 6120 | 9600 | 3200 | 1080 | 29.61 |
| 20000 | .86  | .60 | .4000 | 7200 | 9600 | 3200 | .5788 | .4212 | 6362 | 9260 | 3370 | 6192 | 9600 | 3200 | 1008 | 25.55 |
| 20000 | .87  | .60 | .4000 | 7200 | 9600 | 3200 | .5804 | .4196 | 6421 | 9286 | 3357 | 6264 | 9600 | 3200 | 936  | 21.83 |
| 20000 | .88  | .60 | .4000 | 7200 | 9600 | 3200 | .5819 | .4181 | 6480 | 9311 | 3344 | 6336 | 9600 | 3200 | 864  | 18.43 |
| 20000 | .89  | .60 | .4000 | 7200 | 9600 | 3200 | .5835 | .4165 | 6540 | 9336 | 3332 | 6408 | 9600 | 3200 | 792  | 15.35 |
| 20000 | .90  | .60 | .4000 | 7200 | 9600 | 3200 | .5851 | .4149 | 6600 | 9361 | 3320 | 6480 | 9600 | 3200 | 720  | 12.57 |
| 20000 | .91  | .60 | .4000 | 7200 | 9600 | 3200 | .5866 | .4134 | 6659 | 9386 | 3307 | 6552 | 9600 | 3200 | 648  | 10.09 |
| 20000 | .92  | .60 | .4000 | 7200 | 9600 | 3200 | .5881 | .4119 | 6719 | 9410 | 3295 | 6624 | 9600 | 3200 | 576  | 7.90  |
| 20000 | .93  | .60 | .4000 | 7200 | 9600 | 3200 | .5897 | .4103 | 6779 | 9435 | 3283 | 6696 | 9600 | 3200 | 504  | 6.00  |
| 20000 | .94  | .60 | .4000 | 7200 | 9600 | 3200 | .5912 | .4088 | 6839 | 9459 | 3271 | 6768 | 9600 | 3200 | 432  | 4.37  |
| 20000 | .95  | .60 | .4000 | 7200 | 9600 | 3200 | .5927 | .4073 | 6899 | 9483 | 3259 | 6840 | 9600 | 3200 | 360  | 3.01  |
| 20000 | .96  | .60 | .4000 | 7200 | 9600 | 3200 | .5942 | .4058 | 6959 | 9506 | 3247 | 6912 | 9600 | 3200 | 288  | 1.91  |
| 20000 | .97  | .60 | .4000 | 7200 | 9600 | 3200 | .5956 | .4044 | 7019 | 9530 | 3235 | 6984 | 9600 | 3200 | 216  | 1.06  |
| 20000 | .98  | .60 | .4000 | 7200 | 9600 | 3200 | .5971 | .4029 | 7079 | 9554 | 3223 | 7056 | 9600 | 3200 | 144  | .47   |
| 20000 | .99  | .60 | .4000 | 7200 | 9600 | 3200 | .5986 | .4014 | 7140 | 9577 | 3212 | 7128 | 9600 | 3200 | 72   | .12   |
| 20000 | 1.00 | .60 | .4000 | 7200 | 9600 | 3200 | .6000 | .4000 | 7200 | 9600 | 3200 | 7200 | 9600 | 3200 | 0    | .00   |
| 20000 | 1.01 | .60 | .4000 | 7200 | 9600 | 3200 | .6014 | .3986 | 7261 | 9623 | 3189 | 7272 | 9600 | 3200 | -72  | .11   |
| 20000 | 1.02 | .60 | .4000 | 7200 | 9600 | 3200 | .6029 | .3971 | 7321 | 9646 | 3177 | 7344 | 9600 | 3200 | -144 | .45   |
| 20000 | 1.03 | .60 | .4000 | 7200 | 9600 | 3200 | .6043 | .3957 | 7382 | 9668 | 3166 | 7416 | 9600 | 3200 | -216 | 1.01  |
| 20000 | 1.04 | .60 | .4000 | 7200 | 9600 | 3200 | .6057 | .3943 | 7443 | 9691 | 3155 | 7488 | 9600 | 3200 | -288 | 1.78  |
| 20000 | 1.05 | .60 | .4000 | 7200 | 9600 | 3200 | .6071 | .3929 | 7503 | 9713 | 3143 | 7560 | 9600 | 3200 | -360 | 2.76  |
| 20000 | 1.06 | .60 | .4000 | 7200 | 9600 | 3200 | .6085 | .3915 | 7564 | 9735 | 3132 | 7632 | 9600 | 3200 | -432 | 3.95  |
| 20000 | 1.07 | .60 | .4000 | 7200 | 9600 | 3200 | .6098 | .3902 | 7625 | 9757 | 3121 | 7704 | 9600 | 3200 | -504 | 5.33  |
| 20000 | 1.08 | .60 | .4000 | 7200 | 9600 | 3200 | .6112 | .3888 | 7686 | 9779 | 3110 | 7776 | 9600 | 3200 | -576 | 6.91  |
| 20000 | 1.09 | .60 | .4000 | 7200 | 9600 | 3200 | .6126 | .3874 | 7748 | 9801 | 3100 | 7848 | 9600 | 3200 | -648 | 8.67  |
| 20000 | 1.10 | .60 | .4000 | 7200 | 9600 | 3200 | .6139 | .3861 | 7809 | 9822 | 3089 | 7920 | 9600 | 3200 | -720 | 10.62 |
| 20000 | 1.11 | .60 | .4000 | 7200 | 9600 | 3200 | .6152 | .3848 | 7870 | 9844 | 3078 | 7992 | 9600 | 3200 | -792 | 12.75 |
| 20000 | 1.12 | .60 | .4000 | 7200 | 9600 | 3200 | .6166 | .3834 | 7931 | 9865 | 3067 | 8064 | 9600 | 3200 | -864 | 15.06 |
| 20000 | 1.13 | .60 | .4000 | 7200 | 9600 | 3200 | .6179 | .3821 | 7993 | 9886 | 3057 | 8136 | 9600 | 3200 | -936 | 17.54 |

|       |      |     |       |      |      |      |       |       |      |       |      |      |      |      |       |       |
|-------|------|-----|-------|------|------|------|-------|-------|------|-------|------|------|------|------|-------|-------|
| 20000 | 1.14 | .60 | .4000 | 7200 | 9600 | 3200 | .6192 | .3808 | 8054 | 9907  | 3046 | 8208 | 9600 | 3200 | -1008 | 20.18 |
| 20000 | 1.15 | .60 | .4000 | 7200 | 9600 | 3200 | .6205 | .3795 | 8116 | 9928  | 3036 | 8280 | 9600 | 3200 | -1080 | 22.99 |
| 20000 | 1.16 | .60 | .4000 | 7200 | 9600 | 3200 | .6218 | .3782 | 8178 | 9949  | 3026 | 8352 | 9600 | 3200 | -1152 | 25.97 |
| 20000 | 1.17 | .60 | .4000 | 7200 | 9600 | 3200 | .6231 | .3769 | 8239 | 9969  | 3015 | 8424 | 9600 | 3200 | -1224 | 29.09 |
| 20000 | 1.18 | .60 | .4000 | 7200 | 9600 | 3200 | .6243 | .3757 | 8301 | 9989  | 3005 | 8496 | 9600 | 3200 | -1296 | 32.37 |
| 20000 | 1.19 | .60 | .4000 | 7200 | 9600 | 3200 | .6256 | .3744 | 8363 | 10010 | 2995 | 8568 | 9600 | 3200 | -1368 | 35.80 |
| 20000 | 1.20 | .60 | .4000 | 7200 | 9600 | 3200 | .6269 | .3731 | 8425 | 10030 | 2985 | 8640 | 9600 | 3200 | -1440 | 39.38 |
| 20000 | .80  | .65 | .3500 | 8450 | 9100 | 2450 | .6177 | .3823 | 6986 | 8648  | 2676 | 6760 | 9100 | 2450 | 1690  | 50.08 |
| 20000 | .81  | .65 | .3500 | 8450 | 9100 | 2450 | .6195 | .3805 | 7058 | 8672  | 2664 | 6845 | 9100 | 2450 | 1606  | 44.74 |
| 20000 | .82  | .65 | .3500 | 8450 | 9100 | 2450 | .6212 | .3788 | 7131 | 8697  | 2652 | 6929 | 9100 | 2450 | 1521  | 39.74 |
| 20000 | .83  | .65 | .3500 | 8450 | 9100 | 2450 | .6229 | .3771 | 7203 | 8721  | 2640 | 7014 | 9100 | 2450 | 1437  | 35.09 |
| 20000 | .84  | .65 | .3500 | 8450 | 9100 | 2450 | .6246 | .3754 | 7276 | 8745  | 2628 | 7098 | 9100 | 2450 | 1352  | 30.78 |
| 20000 | .85  | .65 | .3500 | 8450 | 9100 | 2450 | .6263 | .3737 | 7348 | 8768  | 2616 | 7183 | 9100 | 2450 | 1268  | 26.78 |
| 20000 | .86  | .65 | .3500 | 8450 | 9100 | 2450 | .6280 | .3720 | 7421 | 8792  | 2604 | 7267 | 9100 | 2450 | 1183  | 23.10 |
| 20000 | .87  | .65 | .3500 | 8450 | 9100 | 2450 | .6297 | .3703 | 7494 | 8815  | 2592 | 7352 | 9100 | 2450 | 1099  | 19.73 |
| 20000 | .88  | .65 | .3500 | 8450 | 9100 | 2450 | .6313 | .3687 | 7567 | 8838  | 2581 | 7436 | 9100 | 2450 | 1014  | 16.65 |
| 20000 | .89  | .65 | .3500 | 8450 | 9100 | 2450 | .6329 | .3671 | 7640 | 8861  | 2569 | 7521 | 9100 | 2450 | 930   | 13.85 |
| 20000 | .90  | .65 | .3500 | 8450 | 9100 | 2450 | .6346 | .3654 | 7713 | 8884  | 2558 | 7605 | 9100 | 2450 | 845   | 11.34 |
| 20000 | .91  | .65 | .3500 | 8450 | 9100 | 2450 | .6362 | .3638 | 7786 | 8906  | 2547 | 7690 | 9100 | 2450 | 761   | 9.10  |
| 20000 | .92  | .65 | .3500 | 8450 | 9100 | 2450 | .6378 | .3622 | 7860 | 8929  | 2536 | 7774 | 9100 | 2450 | 676   | 7.12  |
| 20000 | .93  | .65 | .3500 | 8450 | 9100 | 2450 | .6393 | .3607 | 7933 | 8951  | 2525 | 7859 | 9100 | 2450 | 592   | 5.40  |
| 20000 | .94  | .65 | .3500 | 8450 | 9100 | 2450 | .6409 | .3591 | 8007 | 8973  | 2514 | 7943 | 9100 | 2450 | 507   | 3.93  |
| 20000 | .95  | .65 | .3500 | 8450 | 9100 | 2450 | .6424 | .3576 | 8080 | 8994  | 2503 | 8028 | 9100 | 2450 | 423   | 2.71  |
| 20000 | .96  | .65 | .3500 | 8450 | 9100 | 2450 | .6440 | .3560 | 8154 | 9016  | 2492 | 8112 | 9100 | 2450 | 338   | 1.72  |
| 20000 | .97  | .65 | .3500 | 8450 | 9100 | 2450 | .6455 | .3545 | 8228 | 9037  | 2481 | 8197 | 9100 | 2450 | 254   | .96   |
| 20000 | .98  | .65 | .3500 | 8450 | 9100 | 2450 | .6470 | .3530 | 8302 | 9058  | 2471 | 8281 | 9100 | 2450 | 169   | .42   |
| 20000 | .99  | .65 | .3500 | 8450 | 9100 | 2450 | .6485 | .3515 | 8376 | 9079  | 2460 | 8366 | 9100 | 2450 | 85    | .10   |
| 20000 | 1.00 | .65 | .3500 | 8450 | 9100 | 2450 | .6500 | .3500 | 8450 | 9100  | 2450 | 8450 | 9100 | 2450 | 0     | .00   |
| 20000 | 1.01 | .65 | .3500 | 8450 | 9100 | 2450 | .6515 | .3485 | 8524 | 9121  | 2440 | 8535 | 9100 | 2450 | -85   | .10   |
| 20000 | 1.02 | .65 | .3500 | 8450 | 9100 | 2450 | .6529 | .3471 | 8598 | 9141  | 2429 | 8619 | 9100 | 2450 | -169  | .41   |
| 20000 | 1.03 | .65 | .3500 | 8450 | 9100 | 2450 | .6544 | .3456 | 8673 | 9161  | 2419 | 8704 | 9100 | 2450 | -254  | .91   |
| 20000 | 1.04 | .65 | .3500 | 8450 | 9100 | 2450 | .6558 | .3442 | 8747 | 9181  | 2409 | 8788 | 9100 | 2450 | -338  | 1.60  |
| 20000 | 1.05 | .65 | .3500 | 8450 | 9100 | 2450 | .6572 | .3428 | 8822 | 9201  | 2399 | 8873 | 9100 | 2450 | -423  | 2.48  |

|       |      |     |       |      |      |      |       |       |      |      |      |       |      |      |       |       |
|-------|------|-----|-------|------|------|------|-------|-------|------|------|------|-------|------|------|-------|-------|
| 20000 | 1.06 | .65 | .3500 | 8450 | 9100 | 2450 | .6587 | .3413 | 8896 | 9221 | 2389 | 8957  | 9100 | 2450 | -507  | 3.54  |
| 20000 | 1.07 | .65 | .3500 | 8450 | 9100 | 2450 | .6601 | .3399 | 8971 | 9241 | 2380 | 9042  | 9100 | 2450 | -592  | 4.78  |
| 20000 | 1.08 | .65 | .3500 | 8450 | 9100 | 2450 | .6614 | .3386 | 9046 | 9260 | 2370 | 9126  | 9100 | 2450 | -676  | 6.19  |
| 20000 | 1.09 | .65 | .3500 | 8450 | 9100 | 2450 | .6628 | .3372 | 9121 | 9279 | 2360 | 9211  | 9100 | 2450 | -761  | 7.77  |
| 20000 | 1.10 | .65 | .3500 | 8450 | 9100 | 2450 | .6642 | .3358 | 9196 | 9299 | 2351 | 9295  | 9100 | 2450 | -845  | 9.51  |
| 20000 | 1.11 | .65 | .3500 | 8450 | 9100 | 2450 | .6655 | .3345 | 9271 | 9318 | 2341 | 9380  | 9100 | 2450 | -930  | 11.42 |
| 20000 | 1.12 | .65 | .3500 | 8450 | 9100 | 2450 | .6669 | .3331 | 9346 | 9336 | 2332 | 9464  | 9100 | 2450 | -1014 | 13.48 |
| 20000 | 1.13 | .65 | .3500 | 8450 | 9100 | 2450 | .6682 | .3318 | 9421 | 9355 | 2322 | 9549  | 9100 | 2450 | -1099 | 15.69 |
| 20000 | 1.14 | .65 | .3500 | 8450 | 9100 | 2450 | .6695 | .3305 | 9496 | 9374 | 2313 | 9633  | 9100 | 2450 | -1183 | 18.05 |
| 20000 | 1.15 | .65 | .3500 | 8450 | 9100 | 2450 | .6709 | .3291 | 9571 | 9392 | 2304 | 9718  | 9100 | 2450 | -1268 | 20.56 |
| 20000 | 1.16 | .65 | .3500 | 8450 | 9100 | 2450 | .6722 | .3278 | 9647 | 9410 | 2295 | 9802  | 9100 | 2450 | -1352 | 23.21 |
| 20000 | 1.17 | .65 | .3500 | 8450 | 9100 | 2450 | .6735 | .3265 | 9722 | 9428 | 2286 | 9887  | 9100 | 2450 | -1437 | 26.00 |
| 20000 | 1.18 | .65 | .3500 | 8450 | 9100 | 2450 | .6747 | .3253 | 9798 | 9446 | 2277 | 9971  | 9100 | 2450 | -1521 | 28.92 |
| 20000 | 1.19 | .65 | .3500 | 8450 | 9100 | 2450 | .6760 | .3240 | 9873 | 9464 | 2268 | 10056 | 9100 | 2450 | -1606 | 31.98 |
| 20000 | 1.20 | .65 | .3500 | 8450 | 9100 | 2450 | .6773 | .3227 | 9949 | 9482 | 2259 | 10140 | 9100 | 2450 | -1690 | 35.17 |
| 20000 | .80  | .70 | .3000 | 9800 | 8400 | 1800 | .6674 | .3326 | 8036 | 8009 | 1996 | 7840  | 8400 | 1800 | 1960  | 43.03 |
| 20000 | .81  | .70 | .3000 | 9800 | 8400 | 1800 | .6692 | .3308 | 8123 | 8030 | 1985 | 7938  | 8400 | 1800 | 1862  | 38.41 |
| 20000 | .82  | .70 | .3000 | 9800 | 8400 | 1800 | .6710 | .3290 | 8210 | 8052 | 1974 | 8036  | 8400 | 1800 | 1764  | 34.11 |
| 20000 | .83  | .70 | .3000 | 9800 | 8400 | 1800 | .6727 | .3273 | 8298 | 8073 | 1964 | 8134  | 8400 | 1800 | 1666  | 30.11 |
| 20000 | .84  | .70 | .3000 | 9800 | 8400 | 1800 | .6745 | .3255 | 8385 | 8094 | 1953 | 8232  | 8400 | 1800 | 1568  | 26.39 |
| 20000 | .85  | .70 | .3000 | 9800 | 8400 | 1800 | .6762 | .3238 | 8473 | 8114 | 1943 | 8330  | 8400 | 1800 | 1470  | 22.95 |
| 20000 | .86  | .70 | .3000 | 9800 | 8400 | 1800 | .6779 | .3221 | 8561 | 8135 | 1933 | 8428  | 8400 | 1800 | 1372  | 19.79 |
| 20000 | .87  | .70 | .3000 | 9800 | 8400 | 1800 | .6796 | .3204 | 8648 | 8155 | 1922 | 8526  | 8400 | 1800 | 1274  | 16.89 |
| 20000 | .88  | .70 | .3000 | 9800 | 8400 | 1800 | .6813 | .3187 | 8736 | 8175 | 1912 | 8624  | 8400 | 1800 | 1176  | 14.25 |
| 20000 | .89  | .70 | .3000 | 9800 | 8400 | 1800 | .6829 | .3171 | 8825 | 8195 | 1903 | 8722  | 8400 | 1800 | 1078  | 11.85 |
| 20000 | .90  | .70 | .3000 | 9800 | 8400 | 1800 | .6845 | .3155 | 8913 | 8215 | 1893 | 8820  | 8400 | 1800 | 980   | 9.70  |
| 20000 | .91  | .70 | .3000 | 9800 | 8400 | 1800 | .6862 | .3138 | 9001 | 8234 | 1883 | 8918  | 8400 | 1800 | 882   | 7.78  |
| 20000 | .92  | .70 | .3000 | 9800 | 8400 | 1800 | .6878 | .3122 | 9089 | 8253 | 1873 | 9016  | 8400 | 1800 | 784   | 6.09  |
| 20000 | .93  | .70 | .3000 | 9800 | 8400 | 1800 | .6893 | .3107 | 9178 | 8272 | 1864 | 9114  | 8400 | 1800 | 686   | 4.61  |
| 20000 | .94  | .70 | .3000 | 9800 | 8400 | 1800 | .6909 | .3091 | 9267 | 8291 | 1855 | 9212  | 8400 | 1800 | 588   | 3.36  |
| 20000 | .95  | .70 | .3000 | 9800 | 8400 | 1800 | .6925 | .3075 | 9355 | 8310 | 1845 | 9310  | 8400 | 1800 | 490   | 2.31  |
| 20000 | .96  | .70 | .3000 | 9800 | 8400 | 1800 | .6940 | .3060 | 9444 | 8328 | 1836 | 9408  | 8400 | 1800 | 392   | 1.46  |
| 20000 | .97  | .70 | .3000 | 9800 | 8400 | 1800 | .6955 | .3045 | 9533 | 8346 | 1827 | 9506  | 8400 | 1800 | 294   | .82   |

|       |      |     |       |       |      |      |       |       |       |      |      |       |      |      |       |       |
|-------|------|-----|-------|-------|------|------|-------|-------|-------|------|------|-------|------|------|-------|-------|
| 20000 | .98  | .70 | .3000 | 9800  | 8400 | 1800 | .6970 | .3030 | 9622  | 8364 | 1818 | 9604  | 8400 | 1800 | 196   | .36   |
| 20000 | .99  | .70 | .3000 | 9800  | 8400 | 1800 | .6985 | .3015 | 9711  | 8382 | 1809 | 9702  | 8400 | 1800 | 98    | .09   |
| 20000 | 1.00 | .70 | .3000 | 9800  | 8400 | 1800 | .7000 | .3000 | 9800  | 8400 | 1800 | 9800  | 8400 | 1800 | 0     | .00   |
| 20000 | 1.01 | .70 | .3000 | 9800  | 8400 | 1800 | .7015 | .2985 | 9889  | 8418 | 1791 | 9898  | 8400 | 1800 | -98   | .09   |
| 20000 | 1.02 | .70 | .3000 | 9800  | 8400 | 1800 | .7029 | .2971 | 9979  | 8435 | 1783 | 9996  | 8400 | 1800 | -196  | .35   |
| 20000 | 1.03 | .70 | .3000 | 9800  | 8400 | 1800 | .7043 | .2957 | 10068 | 8452 | 1774 | 10094 | 8400 | 1800 | -294  | .77   |
| 20000 | 1.04 | .70 | .3000 | 9800  | 8400 | 1800 | .7058 | .2942 | 10157 | 8469 | 1765 | 10192 | 8400 | 1800 | -392  | 1.36  |
| 20000 | 1.05 | .70 | .3000 | 9800  | 8400 | 1800 | .7072 | .2928 | 10247 | 8486 | 1757 | 10290 | 8400 | 1800 | -490  | 2.11  |
| 20000 | 1.06 | .70 | .3000 | 9800  | 8400 | 1800 | .7086 | .2914 | 10337 | 8503 | 1749 | 10388 | 8400 | 1800 | -588  | 3.01  |
| 20000 | 1.07 | .70 | .3000 | 9800  | 8400 | 1800 | .7099 | .2901 | 10426 | 8519 | 1740 | 10486 | 8400 | 1800 | -686  | 4.06  |
| 20000 | 1.08 | .70 | .3000 | 9800  | 8400 | 1800 | .7113 | .2887 | 10516 | 8536 | 1732 | 10584 | 8400 | 1800 | -784  | 5.26  |
| 20000 | 1.09 | .70 | .3000 | 9800  | 8400 | 1800 | .7127 | .2873 | 10606 | 8552 | 1724 | 10682 | 8400 | 1800 | -882  | 6.60  |
| 20000 | 1.10 | .70 | .3000 | 9800  | 8400 | 1800 | .7140 | .2860 | 10696 | 8568 | 1716 | 10780 | 8400 | 1800 | -980  | 8.08  |
| 20000 | 1.11 | .70 | .3000 | 9800  | 8400 | 1800 | .7153 | .2847 | 10786 | 8584 | 1708 | 10878 | 8400 | 1800 | -1078 | 9.70  |
| 20000 | 1.12 | .70 | .3000 | 9800  | 8400 | 1800 | .7167 | .2833 | 10876 | 8600 | 1700 | 10976 | 8400 | 1800 | -1176 | 11.44 |
| 20000 | 1.13 | .70 | .3000 | 9800  | 8400 | 1800 | .7180 | .2820 | 10966 | 8616 | 1692 | 11074 | 8400 | 1800 | -1274 | 13.32 |
| 20000 | 1.14 | .70 | .3000 | 9800  | 8400 | 1800 | .7193 | .2807 | 11056 | 8631 | 1684 | 11172 | 8400 | 1800 | -1372 | 15.32 |
| 20000 | 1.15 | .70 | .3000 | 9800  | 8400 | 1800 | .7205 | .2795 | 11147 | 8646 | 1677 | 11270 | 8400 | 1800 | -1470 | 17.45 |
| 20000 | 1.16 | .70 | .3000 | 9800  | 8400 | 1800 | .7218 | .2782 | 11237 | 8662 | 1669 | 11368 | 8400 | 1800 | -1568 | 19.69 |
| 20000 | 1.17 | .70 | .3000 | 9800  | 8400 | 1800 | .7231 | .2769 | 11328 | 8677 | 1662 | 11466 | 8400 | 1800 | -1666 | 22.05 |
| 20000 | 1.18 | .70 | .3000 | 9800  | 8400 | 1800 | .7243 | .2757 | 11418 | 8692 | 1654 | 11564 | 8400 | 1800 | -1764 | 24.53 |
| 20000 | 1.19 | .70 | .3000 | 9800  | 8400 | 1800 | .7256 | .2744 | 11509 | 8707 | 1647 | 11662 | 8400 | 1800 | -1862 | 27.11 |
| 20000 | 1.20 | .70 | .3000 | 9800  | 8400 | 1800 | .7268 | .2732 | 11599 | 8721 | 1639 | 11760 | 8400 | 1800 | -1960 | 29.81 |
| 20000 | .80  | .75 | .2500 | 11250 | 7500 | 1250 | .7183 | .2817 | 9158  | 7183 | 1408 | 9000  | 7500 | 1250 | 2250  | 34.55 |
| 20000 | .81  | .75 | .2500 | 11250 | 7500 | 1250 | .7201 | .2799 | 9262  | 7201 | 1400 | 9113  | 7500 | 1250 | 2138  | 30.83 |
| 20000 | .82  | .75 | .2500 | 11250 | 7500 | 1250 | .7218 | .2782 | 9366  | 7218 | 1391 | 9225  | 7500 | 1250 | 2025  | 27.36 |
| 20000 | .83  | .75 | .2500 | 11250 | 7500 | 1250 | .7236 | .2764 | 9470  | 7236 | 1382 | 9338  | 7500 | 1250 | 1913  | 24.14 |
| 20000 | .84  | .75 | .2500 | 11250 | 7500 | 1250 | .7253 | .2747 | 9574  | 7253 | 1374 | 9450  | 7500 | 1250 | 1800  | 21.15 |
| 20000 | .85  | .75 | .2500 | 11250 | 7500 | 1250 | .7270 | .2730 | 9678  | 7270 | 1365 | 9563  | 7500 | 1250 | 1688  | 18.39 |
| 20000 | .86  | .75 | .2500 | 11250 | 7500 | 1250 | .7286 | .2714 | 9782  | 7286 | 1357 | 9675  | 7500 | 1250 | 1575  | 15.85 |
| 20000 | .87  | .75 | .2500 | 11250 | 7500 | 1250 | .7303 | .2697 | 9886  | 7303 | 1349 | 9788  | 7500 | 1250 | 1463  | 13.52 |
| 20000 | .88  | .75 | .2500 | 11250 | 7500 | 1250 | .7319 | .2681 | 9990  | 7319 | 1340 | 9900  | 7500 | 1250 | 1350  | 11.40 |
| 20000 | .89  | .75 | .2500 | 11250 | 7500 | 1250 | .7335 | .2665 | 10095 | 7335 | 1332 | 10013 | 7500 | 1250 | 1238  | 9.48  |

|       |      |     |       |       |      |      |       |       |       |      |      |       |      |      |       |       |
|-------|------|-----|-------|-------|------|------|-------|-------|-------|------|------|-------|------|------|-------|-------|
| 20000 | .90  | .75 | .2500 | 11250 | 7500 | 1250 | .7351 | .2649 | 10200 | 7351 | 1325 | 10125 | 7500 | 1250 | 1125  | 7.76  |
| 20000 | .91  | .75 | .2500 | 11250 | 7500 | 1250 | .7367 | .2633 | 10304 | 7367 | 1317 | 10238 | 7500 | 1250 | 1013  | 6.22  |
| 20000 | .92  | .75 | .2500 | 11250 | 7500 | 1250 | .7382 | .2618 | 10409 | 7382 | 1309 | 10350 | 7500 | 1250 | 900   | 4.86  |
| 20000 | .93  | .75 | .2500 | 11250 | 7500 | 1250 | .7398 | .2602 | 10514 | 7398 | 1301 | 10463 | 7500 | 1250 | 788   | 3.69  |
| 20000 | .94  | .75 | .2500 | 11250 | 7500 | 1250 | .7413 | .2587 | 10619 | 7413 | 1294 | 10575 | 7500 | 1250 | 675   | 2.68  |
| 20000 | .95  | .75 | .2500 | 11250 | 7500 | 1250 | .7428 | .2572 | 10724 | 7428 | 1286 | 10688 | 7500 | 1250 | 563   | 1.84  |
| 20000 | .96  | .75 | .2500 | 11250 | 7500 | 1250 | .7442 | .2558 | 10829 | 7442 | 1279 | 10800 | 7500 | 1250 | 450   | 1.17  |
| 20000 | .97  | .75 | .2500 | 11250 | 7500 | 1250 | .7457 | .2543 | 10934 | 7457 | 1271 | 10913 | 7500 | 1250 | 338   | .65   |
| 20000 | .98  | .75 | .2500 | 11250 | 7500 | 1250 | .7472 | .2528 | 11039 | 7472 | 1264 | 11025 | 7500 | 1250 | 225   | .29   |
| 20000 | .99  | .75 | .2500 | 11250 | 7500 | 1250 | .7486 | .2514 | 11145 | 7486 | 1257 | 11138 | 7500 | 1250 | 113   | .07   |
| 20000 | 1.00 | .75 | .2500 | 11250 | 7500 | 1250 | .7500 | .2500 | 11250 | 7500 | 1250 | 11250 | 7500 | 1250 | 0     | .00   |
| 20000 | 1.01 | .75 | .2500 | 11250 | 7500 | 1250 | .7514 | .2486 | 11356 | 7514 | 1243 | 11363 | 7500 | 1250 | -113  | .07   |
| 20000 | 1.02 | .75 | .2500 | 11250 | 7500 | 1250 | .7528 | .2472 | 11461 | 7528 | 1236 | 11475 | 7500 | 1250 | -225  | .28   |
| 20000 | 1.03 | .75 | .2500 | 11250 | 7500 | 1250 | .7541 | .2459 | 11567 | 7541 | 1229 | 11588 | 7500 | 1250 | -338  | .62   |
| 20000 | 1.04 | .75 | .2500 | 11250 | 7500 | 1250 | .7555 | .2445 | 11672 | 7555 | 1222 | 11700 | 7500 | 1250 | -450  | 1.08  |
| 20000 | 1.05 | .75 | .2500 | 11250 | 7500 | 1250 | .7568 | .2432 | 11778 | 7568 | 1216 | 11813 | 7500 | 1250 | -563  | 1.68  |
| 20000 | 1.06 | .75 | .2500 | 11250 | 7500 | 1250 | .7582 | .2418 | 11884 | 7582 | 1209 | 11925 | 7500 | 1250 | -675  | 2.40  |
| 20000 | 1.07 | .75 | .2500 | 11250 | 7500 | 1250 | .7595 | .2405 | 11990 | 7595 | 1203 | 12038 | 7500 | 1250 | -788  | 3.23  |
| 20000 | 1.08 | .75 | .2500 | 11250 | 7500 | 1250 | .7608 | .2392 | 12096 | 7608 | 1196 | 12150 | 7500 | 1250 | -900  | 4.19  |
| 20000 | 1.09 | .75 | .2500 | 11250 | 7500 | 1250 | .7620 | .2380 | 12202 | 7620 | 1190 | 12263 | 7500 | 1250 | -1013 | 5.25  |
| 20000 | 1.10 | .75 | .2500 | 11250 | 7500 | 1250 | .7633 | .2367 | 12308 | 7633 | 1183 | 12375 | 7500 | 1250 | -1125 | 6.43  |
| 20000 | 1.11 | .75 | .2500 | 11250 | 7500 | 1250 | .7646 | .2354 | 12415 | 7646 | 1177 | 12488 | 7500 | 1250 | -1238 | 7.71  |
| 20000 | 1.12 | .75 | .2500 | 11250 | 7500 | 1250 | .7658 | .2342 | 12521 | 7658 | 1171 | 12600 | 7500 | 1250 | -1350 | 9.10  |
| 20000 | 1.13 | .75 | .2500 | 11250 | 7500 | 1250 | .7670 | .2330 | 12627 | 7670 | 1165 | 12713 | 7500 | 1250 | -1463 | 10.59 |
| 20000 | 1.14 | .75 | .2500 | 11250 | 7500 | 1250 | .7683 | .2317 | 12734 | 7683 | 1159 | 12825 | 7500 | 1250 | -1575 | 12.18 |
| 20000 | 1.15 | .75 | .2500 | 11250 | 7500 | 1250 | .7695 | .2305 | 12840 | 7695 | 1153 | 12938 | 7500 | 1250 | -1688 | 13.86 |
| 20000 | 1.16 | .75 | .2500 | 11250 | 7500 | 1250 | .7706 | .2294 | 12947 | 7706 | 1147 | 13050 | 7500 | 1250 | -1800 | 15.64 |
| 20000 | 1.17 | .75 | .2500 | 11250 | 7500 | 1250 | .7718 | .2282 | 13053 | 7718 | 1141 | 13163 | 7500 | 1250 | -1913 | 17.51 |
| 20000 | 1.18 | .75 | .2500 | 11250 | 7500 | 1250 | .7730 | .2270 | 13160 | 7730 | 1135 | 13275 | 7500 | 1250 | -2025 | 19.47 |
| 20000 | 1.19 | .75 | .2500 | 11250 | 7500 | 1250 | .7741 | .2259 | 13267 | 7741 | 1129 | 13388 | 7500 | 1250 | -2138 | 21.52 |
| 20000 | 1.20 | .75 | .2500 | 11250 | 7500 | 1250 | .7753 | .2247 | 13374 | 7753 | 1124 | 13500 | 7500 | 1250 | -2250 | 23.66 |
| 20000 | .80  | .80 | .2000 | 12800 | 6400 | 800  | .7706 | .2294 | 10357 | 6165 | 917  | 10240 | 6400 | 800  | 2560  | 25.31 |
| 20000 | .81  | .80 | .2000 | 12800 | 6400 | 800  | .7723 | .2277 | 10479 | 6179 | 911  | 10368 | 6400 | 800  | 2432  | 22.58 |

|       |      |     |       |       |      |     |       |       |       |      |     |       |      |     |       |       |
|-------|------|-----|-------|-------|------|-----|-------|-------|-------|------|-----|-------|------|-----|-------|-------|
| 20000 | .82  | .80 | .2000 | 12800 | 6400 | 800 | .7740 | .2260 | 10600 | 6192 | 904 | 10496 | 6400 | 800 | 2304  | 20.03 |
| 20000 | .83  | .80 | .2000 | 12800 | 6400 | 800 | .7756 | .2244 | 10722 | 6205 | 898 | 10624 | 6400 | 800 | 2176  | 17.67 |
| 20000 | .84  | .80 | .2000 | 12800 | 6400 | 800 | .7772 | .2228 | 10843 | 6217 | 891 | 10752 | 6400 | 800 | 2048  | 15.47 |
| 20000 | .85  | .80 | .2000 | 12800 | 6400 | 800 | .7788 | .2212 | 10965 | 6230 | 885 | 10880 | 6400 | 800 | 1920  | 13.45 |
| 20000 | .86  | .80 | .2000 | 12800 | 6400 | 800 | .7803 | .2197 | 11087 | 6243 | 879 | 11008 | 6400 | 800 | 1792  | 11.59 |
| 20000 | .87  | .80 | .2000 | 12800 | 6400 | 800 | .7818 | .2182 | 11209 | 6255 | 873 | 11136 | 6400 | 800 | 1664  | 9.88  |
| 20000 | .88  | .80 | .2000 | 12800 | 6400 | 800 | .7834 | .2166 | 11331 | 6267 | 867 | 11264 | 6400 | 800 | 1536  | 8.33  |
| 20000 | .89  | .80 | .2000 | 12800 | 6400 | 800 | .7849 | .2151 | 11453 | 6279 | 861 | 11392 | 6400 | 800 | 1408  | 6.92  |
| 20000 | .90  | .80 | .2000 | 12800 | 6400 | 800 | .7863 | .2137 | 11575 | 6291 | 855 | 11520 | 6400 | 800 | 1280  | 5.66  |
| 20000 | .91  | .80 | .2000 | 12800 | 6400 | 800 | .7878 | .2122 | 11697 | 6302 | 849 | 11648 | 6400 | 800 | 1152  | 4.54  |
| 20000 | .92  | .80 | .2000 | 12800 | 6400 | 800 | .7892 | .2108 | 11819 | 6314 | 843 | 11776 | 6400 | 800 | 1024  | 3.55  |
| 20000 | .93  | .80 | .2000 | 12800 | 6400 | 800 | .7906 | .2094 | 11942 | 6325 | 838 | 11904 | 6400 | 800 | 896   | 2.69  |
| 20000 | .94  | .80 | .2000 | 12800 | 6400 | 800 | .7920 | .2080 | 12064 | 6336 | 832 | 12032 | 6400 | 800 | 768   | 1.96  |
| 20000 | .95  | .80 | .2000 | 12800 | 6400 | 800 | .7934 | .2066 | 12186 | 6347 | 826 | 12160 | 6400 | 800 | 640   | 1.34  |
| 20000 | .96  | .80 | .2000 | 12800 | 6400 | 800 | .7947 | .2053 | 12309 | 6358 | 821 | 12288 | 6400 | 800 | 512   | .85   |
| 20000 | .97  | .80 | .2000 | 12800 | 6400 | 800 | .7961 | .2039 | 12432 | 6369 | 816 | 12416 | 6400 | 800 | 384   | .47   |
| 20000 | .98  | .80 | .2000 | 12800 | 6400 | 800 | .7974 | .2026 | 12554 | 6379 | 810 | 12544 | 6400 | 800 | 256   | .21   |
| 20000 | .99  | .80 | .2000 | 12800 | 6400 | 800 | .7987 | .2013 | 12677 | 6390 | 805 | 12672 | 6400 | 800 | 128   | .05   |
| 20000 | 1.00 | .80 | .2000 | 12800 | 6400 | 800 | .8000 | .2000 | 12800 | 6400 | 800 | 12800 | 6400 | 800 | 0     | .00   |
| 20000 | 1.01 | .80 | .2000 | 12800 | 6400 | 800 | .8013 | .1987 | 12923 | 6410 | 795 | 12928 | 6400 | 800 | -128  | .05   |
| 20000 | 1.02 | .80 | .2000 | 12800 | 6400 | 800 | .8025 | .1975 | 13046 | 6420 | 790 | 13056 | 6400 | 800 | -256  | .20   |
| 20000 | 1.03 | .80 | .2000 | 12800 | 6400 | 800 | .8038 | .1962 | 13169 | 6430 | 785 | 13184 | 6400 | 800 | -384  | .45   |
| 20000 | 1.04 | .80 | .2000 | 12800 | 6400 | 800 | .8050 | .1950 | 13292 | 6440 | 780 | 13312 | 6400 | 800 | -512  | .79   |
| 20000 | 1.05 | .80 | .2000 | 12800 | 6400 | 800 | .8062 | .1938 | 13415 | 6450 | 775 | 13440 | 6400 | 800 | -640  | 1.22  |
| 20000 | 1.06 | .80 | .2000 | 12800 | 6400 | 800 | .8074 | .1926 | 13538 | 6459 | 770 | 13568 | 6400 | 800 | -768  | 1.74  |
| 20000 | 1.07 | .80 | .2000 | 12800 | 6400 | 800 | .8086 | .1914 | 13662 | 6469 | 766 | 13696 | 6400 | 800 | -896  | 2.35  |
| 20000 | 1.08 | .80 | .2000 | 12800 | 6400 | 800 | .8097 | .1903 | 13785 | 6478 | 761 | 13824 | 6400 | 800 | -1024 | 3.04  |
| 20000 | 1.09 | .80 | .2000 | 12800 | 6400 | 800 | .8109 | .1891 | 13908 | 6487 | 756 | 13952 | 6400 | 800 | -1152 | 3.82  |
| 20000 | 1.10 | .80 | .2000 | 12800 | 6400 | 800 | .8120 | .1880 | 14032 | 6496 | 752 | 14080 | 6400 | 800 | -1280 | 4.67  |
| 20000 | 1.11 | .80 | .2000 | 12800 | 6400 | 800 | .8132 | .1868 | 14155 | 6505 | 747 | 14208 | 6400 | 800 | -1408 | 5.60  |
| 20000 | 1.12 | .80 | .2000 | 12800 | 6400 | 800 | .8143 | .1857 | 14279 | 6514 | 743 | 14336 | 6400 | 800 | -1536 | 6.61  |
| 20000 | 1.13 | .80 | .2000 | 12800 | 6400 | 800 | .8154 | .1846 | 14403 | 6523 | 739 | 14464 | 6400 | 800 | -1664 | 7.69  |
| 20000 | 1.14 | .80 | .2000 | 12800 | 6400 | 800 | .8164 | .1836 | 14526 | 6532 | 734 | 14592 | 6400 | 800 | -1792 | 8.84  |



|       |      |     |       |       |      |     |       |       |       |      |     |       |      |     |       |       |
|-------|------|-----|-------|-------|------|-----|-------|-------|-------|------|-----|-------|------|-----|-------|-------|
| 20000 | 1.15 | .80 | .2000 | 12800 | 6400 | 800 | .8175 | .1825 | 14650 | 6540 | 730 | 14720 | 6400 | 800 | -1920 | 10.07 |
| 20000 | 1.16 | .80 | .2000 | 12800 | 6400 | 800 | .8186 | .1814 | 14774 | 6549 | 726 | 14848 | 6400 | 800 | -2048 | 11.36 |
| 20000 | 1.17 | .80 | .2000 | 12800 | 6400 | 800 | .8196 | .1804 | 14898 | 6557 | 722 | 14976 | 6400 | 800 | -2176 | 12.71 |
| 20000 | 1.18 | .80 | .2000 | 12800 | 6400 | 800 | .8207 | .1793 | 15021 | 6565 | 717 | 15104 | 6400 | 800 | -2304 | 14.14 |
| 20000 | 1.19 | .80 | .2000 | 12800 | 6400 | 800 | .8217 | .1783 | 15145 | 6573 | 713 | 15232 | 6400 | 800 | -2432 | 15.62 |
| 20000 | 1.20 | .80 | .2000 | 12800 | 6400 | 800 | .8227 | .1773 | 15269 | 6582 | 709 | 15360 | 6400 | 800 | -2560 | 17.17 |
| 20000 | .80  | .85 | .1500 | 14450 | 5100 | 450 | .8247 | .1753 | 11636 | 4948 | 526 | 11560 | 5100 | 450 | 2890  | 16.15 |
| 20000 | .81  | .85 | .1500 | 14450 | 5100 | 450 | .8261 | .1739 | 11776 | 4957 | 522 | 11705 | 5100 | 450 | 2746  | 14.40 |
| 20000 | .82  | .85 | .1500 | 14450 | 5100 | 450 | .8276 | .1724 | 11916 | 4965 | 517 | 11849 | 5100 | 450 | 2601  | 12.77 |
| 20000 | .83  | .85 | .1500 | 14450 | 5100 | 450 | .8290 | .1710 | 12057 | 4974 | 513 | 11994 | 5100 | 450 | 2457  | 11.26 |
| 20000 | .84  | .85 | .1500 | 14450 | 5100 | 450 | .8304 | .1696 | 12197 | 4982 | 509 | 12138 | 5100 | 450 | 2312  | 9.86  |
| 20000 | .85  | .85 | .1500 | 14450 | 5100 | 450 | .8318 | .1682 | 12337 | 4991 | 505 | 12283 | 5100 | 450 | 2168  | 8.57  |
| 20000 | .86  | .85 | .1500 | 14450 | 5100 | 450 | .8331 | .1669 | 12478 | 4999 | 501 | 12427 | 5100 | 450 | 2023  | 7.38  |
| 20000 | .87  | .85 | .1500 | 14450 | 5100 | 450 | .8345 | .1655 | 12618 | 5007 | 497 | 12572 | 5100 | 450 | 1879  | 6.29  |
| 20000 | .88  | .85 | .1500 | 14450 | 5100 | 450 | .8358 | .1642 | 12759 | 5015 | 493 | 12716 | 5100 | 450 | 1734  | 5.30  |
| 20000 | .89  | .85 | .1500 | 14450 | 5100 | 450 | .8370 | .1630 | 12899 | 5022 | 489 | 12861 | 5100 | 450 | 1590  | 4.41  |
| 20000 | .90  | .85 | .1500 | 14450 | 5100 | 450 | .8383 | .1617 | 13040 | 5030 | 485 | 13005 | 5100 | 450 | 1445  | 3.60  |
| 20000 | .91  | .85 | .1500 | 14450 | 5100 | 450 | .8396 | .1604 | 13181 | 5037 | 481 | 13150 | 5100 | 450 | 1301  | 2.89  |
| 20000 | .92  | .85 | .1500 | 14450 | 5100 | 450 | .8408 | .1592 | 13322 | 5045 | 478 | 13294 | 5100 | 450 | 1156  | 2.26  |
| 20000 | .93  | .85 | .1500 | 14450 | 5100 | 450 | .8420 | .1580 | 13462 | 5052 | 474 | 13439 | 5100 | 450 | 1012  | 1.71  |
| 20000 | .94  | .85 | .1500 | 14450 | 5100 | 450 | .8432 | .1568 | 13603 | 5059 | 470 | 13583 | 5100 | 450 | 867   | 1.24  |
| 20000 | .95  | .85 | .1500 | 14450 | 5100 | 450 | .8444 | .1556 | 13744 | 5066 | 467 | 13728 | 5100 | 450 | 723   | .85   |
| 20000 | .96  | .85 | .1500 | 14450 | 5100 | 450 | .8455 | .1545 | 13885 | 5073 | 463 | 13872 | 5100 | 450 | 578   | .54   |
| 20000 | .97  | .85 | .1500 | 14450 | 5100 | 450 | .8467 | .1533 | 14026 | 5080 | 460 | 14017 | 5100 | 450 | 434   | .30   |
| 20000 | .98  | .85 | .1500 | 14450 | 5100 | 450 | .8478 | .1522 | 14168 | 5087 | 457 | 14161 | 5100 | 450 | 289   | .13   |
| 20000 | .99  | .85 | .1500 | 14450 | 5100 | 450 | .8489 | .1511 | 14309 | 5093 | 453 | 14306 | 5100 | 450 | 145   | .03   |
| 20000 | 1.00 | .85 | .1500 | 14450 | 5100 | 450 | .8500 | .1500 | 14450 | 5100 | 450 | 14450 | 5100 | 450 | 0     | .00   |
| 20000 | 1.01 | .85 | .1500 | 14450 | 5100 | 450 | .8511 | .1489 | 14591 | 5106 | 447 | 14595 | 5100 | 450 | -145  | .03   |
| 20000 | 1.02 | .85 | .1500 | 14450 | 5100 | 450 | .8521 | .1479 | 14733 | 5113 | 444 | 14739 | 5100 | 450 | -289  | .13   |
| 20000 | 1.03 | .85 | .1500 | 14450 | 5100 | 450 | .8532 | .1468 | 14874 | 5119 | 440 | 14884 | 5100 | 450 | -434  | .28   |
| 20000 | 1.04 | .85 | .1500 | 14450 | 5100 | 450 | .8542 | .1458 | 15015 | 5125 | 437 | 15028 | 5100 | 450 | -578  | .50   |
| 20000 | 1.05 | .85 | .1500 | 14450 | 5100 | 450 | .8552 | .1448 | 15157 | 5131 | 434 | 15173 | 5100 | 450 | -723  | .77   |
| 20000 | 1.06 | .85 | .1500 | 14450 | 5100 | 450 | .8562 | .1438 | 15298 | 5137 | 431 | 15317 | 5100 | 450 | -867  | 1.11  |

|       |      |     |       |       |      |     |       |       |       |      |     |       |      |     |       |       |
|-------|------|-----|-------|-------|------|-----|-------|-------|-------|------|-----|-------|------|-----|-------|-------|
| 20000 | 1.07 | .85 | .1500 | 14450 | 5100 | 450 | .8572 | .1428 | 15440 | 5143 | 428 | 15462 | 5100 | 450 | -1012 | 1.49  |
| 20000 | 1.08 | .85 | .1500 | 14450 | 5100 | 450 | .8582 | .1418 | 15581 | 5149 | 425 | 15606 | 5100 | 450 | -1156 | 1.93  |
| 20000 | 1.09 | .85 | .1500 | 14450 | 5100 | 450 | .8592 | .1408 | 15723 | 5155 | 423 | 15751 | 5100 | 450 | -1301 | 2.42  |
| 20000 | 1.10 | .85 | .1500 | 14450 | 5100 | 450 | .8601 | .1399 | 15865 | 5161 | 420 | 15895 | 5100 | 450 | -1445 | 2.96  |
| 20000 | 1.11 | .85 | .1500 | 14450 | 5100 | 450 | .8610 | .1390 | 16006 | 5166 | 417 | 16040 | 5100 | 450 | -1590 | 3.55  |
| 20000 | 1.12 | .85 | .1500 | 14450 | 5100 | 450 | .8620 | .1380 | 16148 | 5172 | 414 | 16184 | 5100 | 450 | -1734 | 4.19  |
| 20000 | 1.13 | .85 | .1500 | 14450 | 5100 | 450 | .8629 | .1371 | 16290 | 5177 | 411 | 16329 | 5100 | 450 | -1879 | 4.87  |
| 20000 | 1.14 | .85 | .1500 | 14450 | 5100 | 450 | .8638 | .1362 | 16432 | 5183 | 409 | 16473 | 5100 | 450 | -2023 | 5.60  |
| 20000 | 1.15 | .85 | .1500 | 14450 | 5100 | 450 | .8647 | .1353 | 16573 | 5188 | 406 | 16618 | 5100 | 450 | -2168 | 6.38  |
| 20000 | 1.16 | .85 | .1500 | 14450 | 5100 | 450 | .8655 | .1345 | 16715 | 5193 | 403 | 16762 | 5100 | 450 | -2312 | 7.20  |
| 20000 | 1.17 | .85 | .1500 | 14450 | 5100 | 450 | .8664 | .1336 | 16857 | 5198 | 401 | 16907 | 5100 | 450 | -2457 | 8.05  |
| 20000 | 1.18 | .85 | .1500 | 14450 | 5100 | 450 | .8673 | .1327 | 16999 | 5204 | 398 | 17051 | 5100 | 450 | -2601 | 8.95  |
| 20000 | 1.19 | .85 | .1500 | 14450 | 5100 | 450 | .8681 | .1319 | 17141 | 5209 | 396 | 17196 | 5100 | 450 | -2746 | 9.89  |
| 20000 | 1.20 | .85 | .1500 | 14450 | 5100 | 450 | .8689 | .1311 | 17283 | 5214 | 393 | 17340 | 5100 | 450 | -2890 | 10.87 |
| 20000 | .80  | .90 | .1000 | 16200 | 3600 | 200 | .8807 | .1193 | 12999 | 3523 | 239 | 12960 | 3600 | 200 | 3240  | 8.08  |
| 20000 | .81  | .90 | .1000 | 16200 | 3600 | 200 | .8818 | .1182 | 13158 | 3527 | 236 | 13122 | 3600 | 200 | 3078  | 7.20  |
| 20000 | .82  | .90 | .1000 | 16200 | 3600 | 200 | .8829 | .1171 | 13318 | 3532 | 234 | 13284 | 3600 | 200 | 2916  | 6.38  |
| 20000 | .83  | .90 | .1000 | 16200 | 3600 | 200 | .8840 | .1160 | 13478 | 3536 | 232 | 13446 | 3600 | 200 | 2754  | 5.63  |
| 20000 | .84  | .90 | .1000 | 16200 | 3600 | 200 | .8851 | .1149 | 13638 | 3540 | 230 | 13608 | 3600 | 200 | 2592  | 4.93  |
| 20000 | .85  | .90 | .1000 | 16200 | 3600 | 200 | .8862 | .1138 | 13798 | 3545 | 228 | 13770 | 3600 | 200 | 2430  | 4.28  |
| 20000 | .86  | .90 | .1000 | 16200 | 3600 | 200 | .8872 | .1128 | 13958 | 3549 | 226 | 13932 | 3600 | 200 | 2268  | 3.69  |
| 20000 | .87  | .90 | .1000 | 16200 | 3600 | 200 | .8882 | .1118 | 14118 | 3553 | 224 | 14094 | 3600 | 200 | 2106  | 3.14  |
| 20000 | .88  | .90 | .1000 | 16200 | 3600 | 200 | .8892 | .1108 | 14278 | 3557 | 222 | 14256 | 3600 | 200 | 1944  | 2.65  |
| 20000 | .89  | .90 | .1000 | 16200 | 3600 | 200 | .8902 | .1098 | 14438 | 3561 | 220 | 14418 | 3600 | 200 | 1782  | 2.20  |
| 20000 | .90  | .90 | .1000 | 16200 | 3600 | 200 | .8912 | .1088 | 14598 | 3565 | 218 | 14580 | 3600 | 200 | 1620  | 1.80  |
| 20000 | .91  | .90 | .1000 | 16200 | 3600 | 200 | .8921 | .1079 | 14758 | 3569 | 216 | 14742 | 3600 | 200 | 1458  | 1.44  |
| 20000 | .92  | .90 | .1000 | 16200 | 3600 | 200 | .8931 | .1069 | 14918 | 3572 | 214 | 14904 | 3600 | 200 | 1296  | 1.13  |
| 20000 | .93  | .90 | .1000 | 16200 | 3600 | 200 | .8940 | .1060 | 15078 | 3576 | 212 | 15066 | 3600 | 200 | 1134  | .85   |
| 20000 | .94  | .90 | .1000 | 16200 | 3600 | 200 | .8949 | .1051 | 15238 | 3580 | 210 | 15228 | 3600 | 200 | 972   | .62   |
| 20000 | .95  | .90 | .1000 | 16200 | 3600 | 200 | .8958 | .1042 | 15398 | 3583 | 208 | 15390 | 3600 | 200 | 810   | .43   |
| 20000 | .96  | .90 | .1000 | 16200 | 3600 | 200 | .8967 | .1033 | 15559 | 3587 | 207 | 15552 | 3600 | 200 | 648   | .27   |
| 20000 | .97  | .90 | .1000 | 16200 | 3600 | 200 | .8975 | .1025 | 15719 | 3590 | 205 | 15714 | 3600 | 200 | 486   | .15   |
| 20000 | .98  | .90 | .1000 | 16200 | 3600 | 200 | .8984 | .1016 | 15879 | 3593 | 203 | 15876 | 3600 | 200 | 324   | .07   |

|       |      |     |       |       |      |     |       |       |       |      |     |       |      |     |       |      |
|-------|------|-----|-------|-------|------|-----|-------|-------|-------|------|-----|-------|------|-----|-------|------|
| 20000 | .99  | .90 | .1000 | 16200 | 3600 | 200 | .8992 | .1008 | 16040 | 3597 | 202 | 16038 | 3600 | 200 | 162   | .02  |
| 20000 | 1.00 | .90 | .1000 | 16200 | 3600 | 200 | .9000 | .1000 | 16200 | 3600 | 200 | 16200 | 3600 | 200 | 0     | .00  |
| 20000 | 1.01 | .90 | .1000 | 16200 | 3600 | 200 | .9008 | .0992 | 16360 | 3603 | 198 | 16362 | 3600 | 200 | -162  | .02  |
| 20000 | 1.02 | .90 | .1000 | 16200 | 3600 | 200 | .9016 | .0984 | 16521 | 3606 | 197 | 16524 | 3600 | 200 | -324  | .06  |
| 20000 | 1.03 | .90 | .1000 | 16200 | 3600 | 200 | .9024 | .0976 | 16681 | 3609 | 195 | 16686 | 3600 | 200 | -486  | .14  |
| 20000 | 1.04 | .90 | .1000 | 16200 | 3600 | 200 | .9031 | .0969 | 16842 | 3613 | 194 | 16848 | 3600 | 200 | -648  | .25  |
| 20000 | 1.05 | .90 | .1000 | 16200 | 3600 | 200 | .9039 | .0961 | 17002 | 3616 | 192 | 17010 | 3600 | 200 | -810  | .39  |
| 20000 | 1.06 | .90 | .1000 | 16200 | 3600 | 200 | .9046 | .0954 | 17163 | 3619 | 191 | 17172 | 3600 | 200 | -972  | .55  |
| 20000 | 1.07 | .90 | .1000 | 16200 | 3600 | 200 | .9054 | .0946 | 17323 | 3621 | 189 | 17334 | 3600 | 200 | -1134 | .74  |
| 20000 | 1.08 | .90 | .1000 | 16200 | 3600 | 200 | .9061 | .0939 | 17484 | 3624 | 188 | 17496 | 3600 | 200 | -1296 | .96  |
| 20000 | 1.09 | .90 | .1000 | 16200 | 3600 | 200 | .9068 | .0932 | 17644 | 3627 | 186 | 17658 | 3600 | 200 | -1458 | 1.20 |
| 20000 | 1.10 | .90 | .1000 | 16200 | 3600 | 200 | .9075 | .0925 | 17805 | 3630 | 185 | 17820 | 3600 | 200 | -1620 | 1.47 |
| 20000 | 1.11 | .90 | .1000 | 16200 | 3600 | 200 | .9082 | .0918 | 17966 | 3633 | 184 | 17982 | 3600 | 200 | -1782 | 1.77 |
| 20000 | 1.12 | .90 | .1000 | 16200 | 3600 | 200 | .9089 | .0911 | 18126 | 3635 | 182 | 18144 | 3600 | 200 | -1944 | 2.08 |
| 20000 | 1.13 | .90 | .1000 | 16200 | 3600 | 200 | .9095 | .0905 | 18287 | 3638 | 181 | 18306 | 3600 | 200 | -2106 | 2.43 |
| 20000 | 1.14 | .90 | .1000 | 16200 | 3600 | 200 | .9102 | .0898 | 18448 | 3641 | 180 | 18468 | 3600 | 200 | -2268 | 2.79 |
| 20000 | 1.15 | .90 | .1000 | 16200 | 3600 | 200 | .9108 | .0892 | 18608 | 3643 | 178 | 18630 | 3600 | 200 | -2430 | 3.17 |
| 20000 | 1.16 | .90 | .1000 | 16200 | 3600 | 200 | .9115 | .0885 | 18769 | 3646 | 177 | 18792 | 3600 | 200 | -2592 | 3.58 |
| 20000 | 1.17 | .90 | .1000 | 16200 | 3600 | 200 | .9121 | .0879 | 18930 | 3648 | 176 | 18954 | 3600 | 200 | -2754 | 4.01 |
| 20000 | 1.18 | .90 | .1000 | 16200 | 3600 | 200 | .9127 | .0873 | 19091 | 3651 | 175 | 19116 | 3600 | 200 | -2916 | 4.45 |
| 20000 | 1.19 | .90 | .1000 | 16200 | 3600 | 200 | .9133 | .0867 | 19251 | 3653 | 173 | 19278 | 3600 | 200 | -3078 | 4.92 |
| 20000 | 1.20 | .90 | .1000 | 16200 | 3600 | 200 | .9139 | .0861 | 19412 | 3656 | 172 | 19440 | 3600 | 200 | -3240 | 5.41 |
| 20000 | .80  | .95 | .0500 | 18050 | 1900 | 50  | .9390 | .0610 | 14451 | 1878 | 61  | 14440 | 1900 | 50  | 3610  | 2.25 |
| 20000 | .81  | .95 | .0500 | 18050 | 1900 | 50  | .9397 | .0603 | 14631 | 1879 | 60  | 14621 | 1900 | 50  | 3430  | 2.01 |
| 20000 | .82  | .95 | .0500 | 18050 | 1900 | 50  | .9403 | .0597 | 14811 | 1881 | 60  | 14801 | 1900 | 50  | 3249  | 1.78 |
| 20000 | .83  | .95 | .0500 | 18050 | 1900 | 50  | .9409 | .0591 | 14991 | 1882 | 59  | 14982 | 1900 | 50  | 3069  | 1.57 |
| 20000 | .84  | .95 | .0500 | 18050 | 1900 | 50  | .9416 | .0584 | 15170 | 1883 | 58  | 15162 | 1900 | 50  | 2888  | 1.37 |
| 20000 | .85  | .95 | .0500 | 18050 | 1900 | 50  | .9422 | .0578 | 15350 | 1884 | 58  | 15343 | 1900 | 50  | 2708  | 1.19 |
| 20000 | .86  | .95 | .0500 | 18050 | 1900 | 50  | .9428 | .0572 | 15530 | 1886 | 57  | 15523 | 1900 | 50  | 2527  | 1.03 |
| 20000 | .87  | .95 | .0500 | 18050 | 1900 | 50  | .9434 | .0566 | 15710 | 1887 | 57  | 15704 | 1900 | 50  | 2347  | .88  |
| 20000 | .88  | .95 | .0500 | 18050 | 1900 | 50  | .9439 | .0561 | 15890 | 1888 | 56  | 15884 | 1900 | 50  | 2166  | .74  |
| 20000 | .89  | .95 | .0500 | 18050 | 1900 | 50  | .9445 | .0555 | 16070 | 1889 | 56  | 16065 | 1900 | 50  | 1986  | .61  |
| 20000 | .90  | .95 | .0500 | 18050 | 1900 | 50  | .9450 | .0550 | 16250 | 1890 | 55  | 16245 | 1900 | 50  | 1805  | .50  |

|       |      |      |       |       |      |    |            |       |       |      |    |       |      |    |       |      |
|-------|------|------|-------|-------|------|----|------------|-------|-------|------|----|-------|------|----|-------|------|
| 20000 | .91  | .95  | .0500 | 18050 | 1900 | 50 | .9456      | .0544 | 16430 | 1891 | 54 | 16426 | 1900 | 50 | 1625  | .40  |
| 20000 | .92  | .95  | .0500 | 18050 | 1900 | 50 | .9461      | .0539 | 16610 | 1892 | 54 | 16606 | 1900 | 50 | 1444  | .31  |
| 20000 | .93  | .95  | .0500 | 18050 | 1900 | 50 | .9466      | .0534 | 16790 | 1893 | 53 | 16787 | 1900 | 50 | 1264  | .24  |
| 20000 | .94  | .95  | .0500 | 18050 | 1900 | 50 | .9471      | .0529 | 16970 | 1894 | 53 | 16967 | 1900 | 50 | 1083  | .17  |
| 20000 | .95  | .95  | .0500 | 18050 | 1900 | 50 | .9476      | .0524 | 17150 | 1895 | 52 | 17148 | 1900 | 50 | 903   | .12  |
| 20000 | .96  | .95  | .0500 | 18050 | 1900 | 50 | .9481      | .0519 | 17330 | 1896 | 52 | 17328 | 1900 | 50 | 722   | .08  |
| 20000 | .97  | .95  | .0500 | 18050 | 1900 | 50 | .9486      | .0514 | 17510 | 1897 | 51 | 17509 | 1900 | 50 | 542   | .04  |
| 20000 | .98  | .95  | .0500 | 18050 | 1900 | 50 | .9491      | .0509 | 17690 | 1898 | 51 | 17689 | 1900 | 50 | 361   | .02  |
| 20000 | .99  | .95  | .0500 | 18050 | 1900 | 50 | .9495      | .0505 | 17870 | 1899 | 50 | 17870 | 1900 | 50 | 181   | .00  |
| 20000 | 1.00 | .95  | .0500 | 18050 | 1900 | 50 | .9500      | .0500 | 18050 | 1900 | 50 | 18050 | 1900 | 50 | 0     | .00  |
| 20000 | 1.01 | .95  | .0500 | 18050 | 1900 | 50 | .9504      | .0496 | 18230 | 1901 | 50 | 18231 | 1900 | 50 | -181  | .00  |
| 20000 | 1.02 | .95  | .0500 | 18050 | 1900 | 50 | .9509      | .0491 | 18410 | 1902 | 49 | 18411 | 1900 | 50 | -361  | .02  |
| 20000 | 1.03 | .95  | .0500 | 18050 | 1900 | 50 | .9513      | .0487 | 18590 | 1903 | 49 | 18592 | 1900 | 50 | -542  | .04  |
| 20000 | 1.04 | .95  | .0500 | 18050 | 1900 | 50 | .9517      | .0483 | 18770 | 1903 | 48 | 18772 | 1900 | 50 | -722  | .07  |
| 20000 | 1.05 | .95  | .0500 | 18050 | 1900 | 50 | .9522      | .0478 | 18950 | 1904 | 48 | 18953 | 1900 | 50 | -903  | .11  |
| 20000 | 1.06 | .95  | .0500 | 18050 | 1900 | 50 | .9526      | .0474 | 19130 | 1905 | 47 | 19133 | 1900 | 50 | -1083 | .15  |
| 20000 | 1.07 | .95  | .0500 | 18050 | 1900 | 50 | .9530      | .0470 | 19311 | 1906 | 47 | 19314 | 1900 | 50 | -1264 | .21  |
| 20000 | 1.08 | .95  | .0500 | 18050 | 1900 | 50 | .9534      | .0466 | 19491 | 1907 | 47 | 19494 | 1900 | 50 | -1444 | .27  |
| 20000 | 1.09 | .95  | .0500 | 18050 | 1900 | 50 | .9538      | .0462 | 19671 | 1908 | 46 | 19675 | 1900 | 50 | -1625 | .34  |
| 20000 | 1.10 | .95  | .0500 | 18050 | 1900 | 50 | .9541      | .0459 | 19851 | 1908 | 46 | 19855 | 1900 | 50 | -1805 | .41  |
| 20000 | 1.11 | .95  | .0500 | 18050 | 1900 | 50 | .9545      | .0455 | 20031 | 1909 | 45 | 20036 | 1900 | 50 | -1986 | .49  |
| 20000 | 1.12 | .95  | .0500 | 18050 | 1900 | 50 | .9549      | .0451 | 20211 | 1910 | 45 | 20216 | 1900 | 50 | -2166 | .58  |
| 20000 | 1.13 | .95  | .0500 | 18050 | 1900 | 50 | .9553      | .0447 | 20391 | 1911 | 45 | 20397 | 1900 | 50 | -2347 | .68  |
| 20000 | 1.14 | .95  | .0500 | 18050 | 1900 | 50 | .9556      | .0444 | 20571 | 1911 | 44 | 20577 | 1900 | 50 | -2527 | .78  |
| 20000 | 1.15 | .95  | .0500 | 18050 | 1900 | 50 | .9560      | .0440 | 20752 | 1912 | 44 | 20758 | 1900 | 50 | -2708 | .88  |
| 20000 | 1.16 | .95  | .0500 | 18050 | 1900 | 50 | .9563      | .0437 | 20932 | 1913 | 44 | 20938 | 1900 | 50 | -2888 | 1.00 |
| 20000 | 1.17 | .95  | .0500 | 18050 | 1900 | 50 | .9567      | .0433 | 21112 | 1913 | 43 | 21119 | 1900 | 50 | -3069 | 1.11 |
| 20000 | 1.18 | .95  | .0500 | 18050 | 1900 | 50 | .9570      | .0430 | 21292 | 1914 | 43 | 21299 | 1900 | 50 | -3249 | 1.24 |
| 20000 | 1.19 | .95  | .0500 | 18050 | 1900 | 50 | .9573      | .0427 | 21472 | 1915 | 43 | 21480 | 1900 | 50 | -3430 | 1.37 |
| 20000 | 1.20 | .95  | .0500 | 18050 | 1900 | 50 | .9576      | .0424 | 21652 | 1915 | 42 | 21660 | 1900 | 50 | -3610 | 1.50 |
| 20000 | .80  | 1.00 | .0000 | 20000 | 0    | 0  | 1.000<br>0 | .0000 | 16000 | 0    | 0  | 16000 | 0    | 0  | 4000  | 1.50 |
| 20000 | .81  | 1.00 | .0000 | 20000 | 0    | 0  | 1.000      | .0000 | 16200 | 0    | 0  | 16200 | 0    | 0  | 3800  | 1.50 |

|       |     |      |       |       |   |   |            |       |       |   |   |       |   |   |      |      |
|-------|-----|------|-------|-------|---|---|------------|-------|-------|---|---|-------|---|---|------|------|
|       |     |      |       |       |   |   | 0          |       |       |   |   |       |   |   |      |      |
| 20000 | .82 | 1.00 | .0000 | 20000 | 0 | 0 | 1.000<br>0 | .0000 | 16400 | 0 | 0 | 16400 | 0 | 0 | 3600 | 1.50 |
| 20000 | .83 | 1.00 | .0000 | 20000 | 0 | 0 | 1.000<br>0 | .0000 | 16600 | 0 | 0 | 16600 | 0 | 0 | 3400 | 1.50 |
| 20000 | .84 | 1.00 | .0000 | 20000 | 0 | 0 | 1.000<br>0 | .0000 | 16800 | 0 | 0 | 16800 | 0 | 0 | 3200 | 1.50 |
| 20000 | .85 | 1.00 | .0000 | 20000 | 0 | 0 | 1.000<br>0 | .0000 | 17000 | 0 | 0 | 17000 | 0 | 0 | 3000 | 1.50 |
| 20000 | .86 | 1.00 | .0000 | 20000 | 0 | 0 | 1.000<br>0 | .0000 | 17200 | 0 | 0 | 17200 | 0 | 0 | 2800 | 1.50 |
| 20000 | .87 | 1.00 | .0000 | 20000 | 0 | 0 | 1.000<br>0 | .0000 | 17400 | 0 | 0 | 17400 | 0 | 0 | 2600 | 1.50 |
| 20000 | .88 | 1.00 | .0000 | 20000 | 0 | 0 | 1.000<br>0 | .0000 | 17600 | 0 | 0 | 17600 | 0 | 0 | 2400 | 1.50 |
| 20000 | .89 | 1.00 | .0000 | 20000 | 0 | 0 | 1.000<br>0 | .0000 | 17800 | 0 | 0 | 17800 | 0 | 0 | 2200 | 1.50 |
| 20000 | .90 | 1.00 | .0000 | 20000 | 0 | 0 | 1.000<br>0 | .0000 | 18000 | 0 | 0 | 18000 | 0 | 0 | 2000 | 1.50 |
| 20000 | .91 | 1.00 | .0000 | 20000 | 0 | 0 | 1.000<br>0 | .0000 | 18200 | 0 | 0 | 18200 | 0 | 0 | 1800 | 1.50 |
| 20000 | .92 | 1.00 | .0000 | 20000 | 0 | 0 | 1.000<br>0 | .0000 | 18400 | 0 | 0 | 18400 | 0 | 0 | 1600 | 1.50 |
| 20000 | .93 | 1.00 | .0000 | 20000 | 0 | 0 | 1.000<br>0 | .0000 | 18600 | 0 | 0 | 18600 | 0 | 0 | 1400 | 1.50 |
| 20000 | .94 | 1.00 | .0000 | 20000 | 0 | 0 | 1.000<br>0 | .0000 | 18800 | 0 | 0 | 18800 | 0 | 0 | 1200 | 1.50 |
| 20000 | .95 | 1.00 | .0000 | 20000 | 0 | 0 | 1.000<br>0 | .0000 | 19000 | 0 | 0 | 19000 | 0 | 0 | 1000 | 1.50 |
| 20000 | .96 | 1.00 | .0000 | 20000 | 0 | 0 | 1.000<br>0 | .0000 | 19200 | 0 | 0 | 19200 | 0 | 0 | 800  | 1.50 |
| 20000 | .97 | 1.00 | .0000 | 20000 | 0 | 0 | 1.000<br>0 | .0000 | 19400 | 0 | 0 | 19400 | 0 | 0 | 600  | 1.50 |
| 20000 | .98 | 1.00 | .0000 | 20000 | 0 | 0 | 1.000      | .0000 | 19600 | 0 | 0 | 19600 | 0 | 0 | 400  | 1.50 |

|       |      |      |       |       |   |   |            |       |       |   |   |       |   |   |       |      |
|-------|------|------|-------|-------|---|---|------------|-------|-------|---|---|-------|---|---|-------|------|
|       |      |      |       |       |   |   | 0          |       |       |   |   |       |   |   |       |      |
| 20000 | .99  | 1.00 | .0000 | 20000 | 0 | 0 | 1.000<br>0 | .0000 | 19800 | 0 | 0 | 19800 | 0 | 0 | 200   | 1.50 |
| 20000 | 1.00 | 1.00 | .0000 | 20000 | 0 | 0 | 1.000<br>0 | .0000 | 20000 | 0 | 0 | 20000 | 0 | 0 | 0     | 1.50 |
| 20000 | 1.01 | 1.00 | .0000 | 20000 | 0 | 0 | 1.000<br>0 | .0000 | 20200 | 0 | 0 | 20200 | 0 | 0 | -200  | 1.50 |
| 20000 | 1.02 | 1.00 | .0000 | 20000 | 0 | 0 | 1.000<br>0 | .0000 | 20400 | 0 | 0 | 20400 | 0 | 0 | -400  | 1.50 |
| 20000 | 1.03 | 1.00 | .0000 | 20000 | 0 | 0 | 1.000<br>0 | .0000 | 20600 | 0 | 0 | 20600 | 0 | 0 | -600  | 1.50 |
| 20000 | 1.04 | 1.00 | .0000 | 20000 | 0 | 0 | 1.000<br>0 | .0000 | 20800 | 0 | 0 | 20800 | 0 | 0 | -800  | 1.50 |
| 20000 | 1.05 | 1.00 | .0000 | 20000 | 0 | 0 | 1.000<br>0 | .0000 | 21000 | 0 | 0 | 21000 | 0 | 0 | -1000 | 1.50 |
| 20000 | 1.06 | 1.00 | .0000 | 20000 | 0 | 0 | 1.000<br>0 | .0000 | 21200 | 0 | 0 | 21200 | 0 | 0 | -1200 | 1.50 |
| 20000 | 1.07 | 1.00 | .0000 | 20000 | 0 | 0 | 1.000<br>0 | .0000 | 21400 | 0 | 0 | 21400 | 0 | 0 | -1400 | 1.50 |
| 20000 | 1.08 | 1.00 | .0000 | 20000 | 0 | 0 | 1.000<br>0 | .0000 | 21600 | 0 | 0 | 21600 | 0 | 0 | -1600 | 1.50 |
| 20000 | 1.09 | 1.00 | .0000 | 20000 | 0 | 0 | 1.000<br>0 | .0000 | 21800 | 0 | 0 | 21800 | 0 | 0 | -1800 | 1.50 |
| 20000 | 1.10 | 1.00 | .0000 | 20000 | 0 | 0 | 1.000<br>0 | .0000 | 22000 | 0 | 0 | 22000 | 0 | 0 | -2000 | 1.50 |
| 20000 | 1.11 | 1.00 | .0000 | 20000 | 0 | 0 | 1.000<br>0 | .0000 | 22200 | 0 | 0 | 22200 | 0 | 0 | -2200 | 1.50 |
| 20000 | 1.12 | 1.00 | .0000 | 20000 | 0 | 0 | 1.000<br>0 | .0000 | 22400 | 0 | 0 | 22400 | 0 | 0 | -2400 | 1.50 |
| 20000 | 1.13 | 1.00 | .0000 | 20000 | 0 | 0 | 1.000<br>0 | .0000 | 22600 | 0 | 0 | 22600 | 0 | 0 | -2600 | 1.50 |
| 20000 | 1.14 | 1.00 | .0000 | 20000 | 0 | 0 | 1.000<br>0 | .0000 | 22800 | 0 | 0 | 22800 | 0 | 0 | -2800 | 1.50 |
| 20000 | 1.15 | 1.00 | .0000 | 20000 | 0 | 0 | 1.000      | .0000 | 23000 | 0 | 0 | 23000 | 0 | 0 | -3000 | 1.50 |

|       |      |      |       |       |      |       |            |       |       |      |       |       |      |       |       |      |
|-------|------|------|-------|-------|------|-------|------------|-------|-------|------|-------|-------|------|-------|-------|------|
|       |      |      |       |       |      |       | 0          |       |       |      |       |       |      |       |       |      |
| 20000 | 1.16 | 1.00 | .0000 | 20000 | 0    | 0     | 1.000<br>0 | .0000 | 23200 | 0    | 0     | 23200 | 0    | 0     | -3200 | 1.50 |
| 20000 | 1.17 | 1.00 | .0000 | 20000 | 0    | 0     | 1.000<br>0 | .0000 | 23400 | 0    | 0     | 23400 | 0    | 0     | -3400 | 1.50 |
| 20000 | 1.18 | 1.00 | .0000 | 20000 | 0    | 0     | 1.000<br>0 | .0000 | 23600 | 0    | 0     | 23600 | 0    | 0     | -3600 | 1.50 |
| 20000 | 1.19 | 1.00 | .0000 | 20000 | 0    | 0     | 1.000<br>0 | .0000 | 23800 | 0    | 0     | 23800 | 0    | 0     | -3800 | 1.50 |
| 20000 | 1.20 | 1.00 | .0000 | 20000 | 0    | 0     | 1.000<br>0 | .0000 | 24000 | 0    | 0     | 24000 | 0    | 0     | -4000 | 1.50 |
| 50000 | .80  | .05  | .9500 | 125   | 4750 | 45125 | .0495      | .9505 | 123   | 4705 | 45148 | 100   | 4750 | 45125 | 25    | 4.60 |
| 50000 | .81  | .05  | .9500 | 125   | 4750 | 45125 | .0495      | .9505 | 123   | 4707 | 45146 | 101   | 4750 | 45125 | 24    | 4.15 |
| 50000 | .82  | .05  | .9500 | 125   | 4750 | 45125 | .0496      | .9504 | 123   | 4709 | 45145 | 103   | 4750 | 45125 | 23    | 3.72 |
| 50000 | .83  | .05  | .9500 | 125   | 4750 | 45125 | .0496      | .9504 | 123   | 4712 | 45144 | 104   | 4750 | 45125 | 21    | 3.32 |
| 50000 | .84  | .05  | .9500 | 125   | 4750 | 45125 | .0496      | .9504 | 123   | 4714 | 45143 | 105   | 4750 | 45125 | 20    | 2.93 |
| 50000 | .85  | .05  | .9500 | 125   | 4750 | 45125 | .0496      | .9504 | 123   | 4716 | 45142 | 106   | 4750 | 45125 | 19    | 2.58 |
| 50000 | .86  | .05  | .9500 | 125   | 4750 | 45125 | .0497      | .9503 | 123   | 4718 | 45141 | 108   | 4750 | 45125 | 18    | 2.24 |
| 50000 | .87  | .05  | .9500 | 125   | 4750 | 45125 | .0497      | .9503 | 123   | 4721 | 45140 | 109   | 4750 | 45125 | 16    | 1.93 |
| 50000 | .88  | .05  | .9500 | 125   | 4750 | 45125 | .0497      | .9503 | 124   | 4723 | 45139 | 110   | 4750 | 45125 | 15    | 1.64 |
| 50000 | .89  | .05  | .9500 | 125   | 4750 | 45125 | .0497      | .9503 | 124   | 4725 | 45137 | 111   | 4750 | 45125 | 14    | 1.38 |
| 50000 | .90  | .05  | .9500 | 125   | 4750 | 45125 | .0498      | .9502 | 124   | 4727 | 45136 | 113   | 4750 | 45125 | 13    | 1.14 |
| 50000 | .91  | .05  | .9500 | 125   | 4750 | 45125 | .0498      | .9502 | 124   | 4730 | 45135 | 114   | 4750 | 45125 | 11    | .92  |
| 50000 | .92  | .05  | .9500 | 125   | 4750 | 45125 | .0498      | .9502 | 124   | 4732 | 45134 | 115   | 4750 | 45125 | 10    | .73  |
| 50000 | .93  | .05  | .9500 | 125   | 4750 | 45125 | .0498      | .9502 | 124   | 4734 | 45133 | 116   | 4750 | 45125 | 9     | .56  |
| 50000 | .94  | .05  | .9500 | 125   | 4750 | 45125 | .0499      | .9501 | 124   | 4736 | 45132 | 118   | 4750 | 45125 | 8     | .41  |
| 50000 | .95  | .05  | .9500 | 125   | 4750 | 45125 | .0499      | .9501 | 124   | 4739 | 45131 | 119   | 4750 | 45125 | 6     | .28  |
| 50000 | .96  | .05  | .9500 | 125   | 4750 | 45125 | .0499      | .9501 | 125   | 4741 | 45130 | 120   | 4750 | 45125 | 5     | .18  |
| 50000 | .97  | .05  | .9500 | 125   | 4750 | 45125 | .0499      | .9501 | 125   | 4743 | 45128 | 121   | 4750 | 45125 | 4     | .10  |
| 50000 | .98  | .05  | .9500 | 125   | 4750 | 45125 | .0500      | .9500 | 125   | 4745 | 45127 | 123   | 4750 | 45125 | 3     | .05  |
| 50000 | .99  | .05  | .9500 | 125   | 4750 | 45125 | .0500      | .9500 | 125   | 4748 | 45126 | 124   | 4750 | 45125 | 1     | .01  |
| 50000 | 1.00 | .05  | .9500 | 125   | 4750 | 45125 | .0500      | .9500 | 125   | 4750 | 45125 | 125   | 4750 | 45125 | 0     | .00  |
| 50000 | 1.01 | .05  | .9500 | 125   | 4750 | 45125 | .0500      | .9500 | 125   | 4752 | 45124 | 126   | 4750 | 45125 | -1    | .01  |

|       |      |     |       |     |      |       |       |       |     |      |       |     |      |       |     |       |
|-------|------|-----|-------|-----|------|-------|-------|-------|-----|------|-------|-----|------|-------|-----|-------|
| 50000 | 1.02 | .05 | .9500 | 125 | 4750 | 45125 | .0500 | .9500 | 125 | 4755 | 45123 | 128 | 4750 | 45125 | -3  | .05   |
| 50000 | 1.03 | .05 | .9500 | 125 | 4750 | 45125 | .0501 | .9499 | 125 | 4757 | 45122 | 129 | 4750 | 45125 | -4  | .10   |
| 50000 | 1.04 | .05 | .9500 | 125 | 4750 | 45125 | .0501 | .9499 | 125 | 4759 | 45120 | 130 | 4750 | 45125 | -5  | .18   |
| 50000 | 1.05 | .05 | .9500 | 125 | 4750 | 45125 | .0501 | .9499 | 126 | 4761 | 45119 | 131 | 4750 | 45125 | -6  | .28   |
| 50000 | 1.06 | .05 | .9500 | 125 | 4750 | 45125 | .0501 | .9499 | 126 | 4764 | 45118 | 133 | 4750 | 45125 | -8  | .40   |
| 50000 | 1.07 | .05 | .9500 | 125 | 4750 | 45125 | .0502 | .9498 | 126 | 4766 | 45117 | 134 | 4750 | 45125 | -9  | .55   |
| 50000 | 1.08 | .05 | .9500 | 125 | 4750 | 45125 | .0502 | .9498 | 126 | 4768 | 45116 | 135 | 4750 | 45125 | -10 | .72   |
| 50000 | 1.09 | .05 | .9500 | 125 | 4750 | 45125 | .0502 | .9498 | 126 | 4770 | 45115 | 136 | 4750 | 45125 | -11 | .91   |
| 50000 | 1.10 | .05 | .9500 | 125 | 4750 | 45125 | .0502 | .9498 | 126 | 4773 | 45114 | 138 | 4750 | 45125 | -13 | 1.12  |
| 50000 | 1.11 | .05 | .9500 | 125 | 4750 | 45125 | .0503 | .9497 | 126 | 4775 | 45113 | 139 | 4750 | 45125 | -14 | 1.35  |
| 50000 | 1.12 | .05 | .9500 | 125 | 4750 | 45125 | .0503 | .9497 | 126 | 4777 | 45111 | 140 | 4750 | 45125 | -15 | 1.61  |
| 50000 | 1.13 | .05 | .9500 | 125 | 4750 | 45125 | .0503 | .9497 | 127 | 4779 | 45110 | 141 | 4750 | 45125 | -16 | 1.88  |
| 50000 | 1.14 | .05 | .9500 | 125 | 4750 | 45125 | .0503 | .9497 | 127 | 4782 | 45109 | 143 | 4750 | 45125 | -18 | 2.18  |
| 50000 | 1.15 | .05 | .9500 | 125 | 4750 | 45125 | .0504 | .9496 | 127 | 4784 | 45108 | 144 | 4750 | 45125 | -19 | 2.50  |
| 50000 | 1.16 | .05 | .9500 | 125 | 4750 | 45125 | .0504 | .9496 | 127 | 4786 | 45107 | 145 | 4750 | 45125 | -20 | 2.84  |
| 50000 | 1.17 | .05 | .9500 | 125 | 4750 | 45125 | .0504 | .9496 | 127 | 4788 | 45106 | 146 | 4750 | 45125 | -21 | 3.21  |
| 50000 | 1.18 | .05 | .9500 | 125 | 4750 | 45125 | .0504 | .9496 | 127 | 4791 | 45105 | 148 | 4750 | 45125 | -23 | 3.59  |
| 50000 | 1.19 | .05 | .9500 | 125 | 4750 | 45125 | .0505 | .9495 | 127 | 4793 | 45104 | 149 | 4750 | 45125 | -24 | 4.00  |
| 50000 | 1.20 | .05 | .9500 | 125 | 4750 | 45125 | .0505 | .9495 | 127 | 4795 | 45102 | 150 | 4750 | 45125 | -25 | 4.43  |
| 50000 | .80  | .10 | .9000 | 500 | 9000 | 40500 | .0982 | .9018 | 481 | 8838 | 40581 | 400 | 9000 | 40500 | 100 | 16.83 |
| 50000 | .81  | .10 | .9000 | 500 | 9000 | 40500 | .0983 | .9017 | 482 | 8846 | 40577 | 405 | 9000 | 40500 | 95  | 15.16 |
| 50000 | .82  | .10 | .9000 | 500 | 9000 | 40500 | .0984 | .9016 | 483 | 8854 | 40573 | 410 | 9000 | 40500 | 90  | 13.58 |
| 50000 | .83  | .10 | .9000 | 500 | 9000 | 40500 | .0985 | .9015 | 484 | 8862 | 40569 | 415 | 9000 | 40500 | 85  | 12.09 |
| 50000 | .84  | .10 | .9000 | 500 | 9000 | 40500 | .0986 | .9014 | 485 | 8870 | 40565 | 420 | 9000 | 40500 | 80  | 10.69 |
| 50000 | .85  | .10 | .9000 | 500 | 9000 | 40500 | .0986 | .9014 | 486 | 8878 | 40561 | 425 | 9000 | 40500 | 75  | 9.38  |
| 50000 | .86  | .10 | .9000 | 500 | 9000 | 40500 | .0987 | .9013 | 487 | 8886 | 40557 | 430 | 9000 | 40500 | 70  | 8.15  |
| 50000 | .87  | .10 | .9000 | 500 | 9000 | 40500 | .0988 | .9012 | 488 | 8895 | 40553 | 435 | 9000 | 40500 | 65  | 7.02  |
| 50000 | .88  | .10 | .9000 | 500 | 9000 | 40500 | .0989 | .9011 | 489 | 8903 | 40549 | 440 | 9000 | 40500 | 60  | 5.97  |
| 50000 | .89  | .10 | .9000 | 500 | 9000 | 40500 | .0990 | .9010 | 490 | 8911 | 40545 | 445 | 9000 | 40500 | 55  | 5.00  |
| 50000 | .90  | .10 | .9000 | 500 | 9000 | 40500 | .0991 | .9009 | 491 | 8919 | 40541 | 450 | 9000 | 40500 | 50  | 4.13  |
| 50000 | .91  | .10 | .9000 | 500 | 9000 | 40500 | .0992 | .9008 | 491 | 8927 | 40536 | 455 | 9000 | 40500 | 45  | 3.34  |
| 50000 | .92  | .10 | .9000 | 500 | 9000 | 40500 | .0993 | .9007 | 492 | 8935 | 40532 | 460 | 9000 | 40500 | 40  | 2.63  |
| 50000 | .93  | .10 | .9000 | 500 | 9000 | 40500 | .0994 | .9006 | 493 | 8943 | 40528 | 465 | 9000 | 40500 | 35  | 2.01  |



|       |      |     |       |      |       |       |       |       |      |       |       |     |       |       |      |       |
|-------|------|-----|-------|------|-------|-------|-------|-------|------|-------|-------|-----|-------|-------|------|-------|
| 50000 | .94  | .10 | .9000 | 500  | 9000  | 40500 | .0995 | .9005 | 494  | 8951  | 40524 | 470 | 9000  | 40500 | 30   | 1.47  |
| 50000 | .95  | .10 | .9000 | 500  | 9000  | 40500 | .0995 | .9005 | 495  | 8959  | 40520 | 475 | 9000  | 40500 | 25   | 1.02  |
| 50000 | .96  | .10 | .9000 | 500  | 9000  | 40500 | .0996 | .9004 | 496  | 8968  | 40516 | 480 | 9000  | 40500 | 20   | .65   |
| 50000 | .97  | .10 | .9000 | 500  | 9000  | 40500 | .0997 | .9003 | 497  | 8976  | 40512 | 485 | 9000  | 40500 | 15   | .37   |
| 50000 | .98  | .10 | .9000 | 500  | 9000  | 40500 | .0998 | .9002 | 498  | 8984  | 40508 | 490 | 9000  | 40500 | 10   | .16   |
| 50000 | .99  | .10 | .9000 | 500  | 9000  | 40500 | .0999 | .9001 | 499  | 8992  | 40504 | 495 | 9000  | 40500 | 5    | .04   |
| 50000 | 1.00 | .10 | .9000 | 500  | 9000  | 40500 | .1000 | .9000 | 500  | 9000  | 40500 | 500 | 9000  | 40500 | 0    | .00   |
| 50000 | 1.01 | .10 | .9000 | 500  | 9000  | 40500 | .1001 | .8999 | 501  | 9008  | 40496 | 505 | 9000  | 40500 | -5   | .04   |
| 50000 | 1.02 | .10 | .9000 | 500  | 9000  | 40500 | .1002 | .8998 | 502  | 9016  | 40492 | 510 | 9000  | 40500 | -10  | .16   |
| 50000 | 1.03 | .10 | .9000 | 500  | 9000  | 40500 | .1003 | .8997 | 503  | 9024  | 40488 | 515 | 9000  | 40500 | -15  | .36   |
| 50000 | 1.04 | .10 | .9000 | 500  | 9000  | 40500 | .1004 | .8996 | 504  | 9032  | 40484 | 520 | 9000  | 40500 | -20  | .64   |
| 50000 | 1.05 | .10 | .9000 | 500  | 9000  | 40500 | .1004 | .8996 | 505  | 9040  | 40480 | 525 | 9000  | 40500 | -25  | 1.00  |
| 50000 | 1.06 | .10 | .9000 | 500  | 9000  | 40500 | .1005 | .8995 | 506  | 9049  | 40476 | 530 | 9000  | 40500 | -30  | 1.44  |
| 50000 | 1.07 | .10 | .9000 | 500  | 9000  | 40500 | .1006 | .8994 | 507  | 9057  | 40472 | 535 | 9000  | 40500 | -35  | 1.96  |
| 50000 | 1.08 | .10 | .9000 | 500  | 9000  | 40500 | .1007 | .8993 | 508  | 9065  | 40468 | 540 | 9000  | 40500 | -40  | 2.55  |
| 50000 | 1.09 | .10 | .9000 | 500  | 9000  | 40500 | .1008 | .8992 | 509  | 9073  | 40464 | 545 | 9000  | 40500 | -45  | 3.23  |
| 50000 | 1.10 | .10 | .9000 | 500  | 9000  | 40500 | .1009 | .8991 | 510  | 9081  | 40460 | 550 | 9000  | 40500 | -50  | 3.97  |
| 50000 | 1.11 | .10 | .9000 | 500  | 9000  | 40500 | .1010 | .8990 | 510  | 9089  | 40455 | 555 | 9000  | 40500 | -55  | 4.80  |
| 50000 | 1.12 | .10 | .9000 | 500  | 9000  | 40500 | .1011 | .8989 | 511  | 9097  | 40451 | 560 | 9000  | 40500 | -60  | 5.70  |
| 50000 | 1.13 | .10 | .9000 | 500  | 9000  | 40500 | .1012 | .8988 | 512  | 9105  | 40447 | 565 | 9000  | 40500 | -65  | 6.68  |
| 50000 | 1.14 | .10 | .9000 | 500  | 9000  | 40500 | .1013 | .8987 | 513  | 9113  | 40443 | 570 | 9000  | 40500 | -70  | 7.73  |
| 50000 | 1.15 | .10 | .9000 | 500  | 9000  | 40500 | .1013 | .8987 | 514  | 9121  | 40439 | 575 | 9000  | 40500 | -75  | 8.86  |
| 50000 | 1.16 | .10 | .9000 | 500  | 9000  | 40500 | .1014 | .8986 | 515  | 9129  | 40435 | 580 | 9000  | 40500 | -80  | 10.06 |
| 50000 | 1.17 | .10 | .9000 | 500  | 9000  | 40500 | .1015 | .8985 | 516  | 9137  | 40431 | 585 | 9000  | 40500 | -85  | 11.34 |
| 50000 | 1.18 | .10 | .9000 | 500  | 9000  | 40500 | .1016 | .8984 | 517  | 9146  | 40427 | 590 | 9000  | 40500 | -90  | 12.68 |
| 50000 | 1.19 | .10 | .9000 | 500  | 9000  | 40500 | .1017 | .8983 | 518  | 9154  | 40423 | 595 | 9000  | 40500 | -95  | 14.11 |
| 50000 | 1.20 | .10 | .9000 | 500  | 9000  | 40500 | .1018 | .8982 | 519  | 9162  | 40419 | 600 | 9000  | 40500 | -100 | 15.60 |
| 50000 | .80  | .15 | .8500 | 1125 | 12750 | 36125 | .1462 | .8538 | 1063 | 12423 | 36288 | 900 | 12750 | 36125 | 225  | 34.40 |
| 50000 | .81  | .15 | .8500 | 1125 | 12750 | 36125 | .1464 | .8536 | 1066 | 12440 | 36280 | 911 | 12750 | 36125 | 214  | 30.96 |
| 50000 | .82  | .15 | .8500 | 1125 | 12750 | 36125 | .1465 | .8535 | 1069 | 12456 | 36272 | 923 | 12750 | 36125 | 203  | 27.70 |
| 50000 | .83  | .15 | .8500 | 1125 | 12750 | 36125 | .1467 | .8533 | 1072 | 12473 | 36264 | 934 | 12750 | 36125 | 191  | 24.64 |
| 50000 | .84  | .15 | .8500 | 1125 | 12750 | 36125 | .1469 | .8531 | 1076 | 12489 | 36256 | 945 | 12750 | 36125 | 180  | 21.77 |
| 50000 | .85  | .15 | .8500 | 1125 | 12750 | 36125 | .1471 | .8529 | 1079 | 12505 | 36247 | 956 | 12750 | 36125 | 169  | 19.08 |

|       |      |     |       |      |       |       |       |       |      |       |       |      |       |       |      |       |
|-------|------|-----|-------|------|-------|-------|-------|-------|------|-------|-------|------|-------|-------|------|-------|
| 50000 | .86  | .15 | .8500 | 1125 | 12750 | 36125 | .1473 | .8527 | 1082 | 12522 | 36239 | 968  | 12750 | 36125 | 158  | 16.57 |
| 50000 | .87  | .15 | .8500 | 1125 | 12750 | 36125 | .1475 | .8525 | 1085 | 12538 | 36231 | 979  | 12750 | 36125 | 146  | 14.25 |
| 50000 | .88  | .15 | .8500 | 1125 | 12750 | 36125 | .1477 | .8523 | 1088 | 12554 | 36223 | 990  | 12750 | 36125 | 135  | 12.10 |
| 50000 | .89  | .15 | .8500 | 1125 | 12750 | 36125 | .1479 | .8521 | 1091 | 12571 | 36215 | 1001 | 12750 | 36125 | 124  | 10.14 |
| 50000 | .90  | .15 | .8500 | 1125 | 12750 | 36125 | .1481 | .8519 | 1094 | 12587 | 36206 | 1013 | 12750 | 36125 | 113  | 8.36  |
| 50000 | .91  | .15 | .8500 | 1125 | 12750 | 36125 | .1483 | .8517 | 1097 | 12603 | 36198 | 1024 | 12750 | 36125 | 101  | 6.75  |
| 50000 | .92  | .15 | .8500 | 1125 | 12750 | 36125 | .1485 | .8515 | 1100 | 12620 | 36190 | 1035 | 12750 | 36125 | 90   | 5.32  |
| 50000 | .93  | .15 | .8500 | 1125 | 12750 | 36125 | .1487 | .8513 | 1103 | 12636 | 36182 | 1046 | 12750 | 36125 | 79   | 4.06  |
| 50000 | .94  | .15 | .8500 | 1125 | 12750 | 36125 | .1489 | .8511 | 1106 | 12652 | 36174 | 1058 | 12750 | 36125 | 68   | 2.98  |
| 50000 | .95  | .15 | .8500 | 1125 | 12750 | 36125 | .1490 | .8510 | 1109 | 12669 | 36166 | 1069 | 12750 | 36125 | 56   | 2.06  |
| 50000 | .96  | .15 | .8500 | 1125 | 12750 | 36125 | .1492 | .8508 | 1113 | 12685 | 36158 | 1080 | 12750 | 36125 | 45   | 1.32  |
| 50000 | .97  | .15 | .8500 | 1125 | 12750 | 36125 | .1494 | .8506 | 1116 | 12701 | 36149 | 1091 | 12750 | 36125 | 34   | .74   |
| 50000 | .98  | .15 | .8500 | 1125 | 12750 | 36125 | .1496 | .8504 | 1119 | 12717 | 36141 | 1103 | 12750 | 36125 | 23   | .33   |
| 50000 | .99  | .15 | .8500 | 1125 | 12750 | 36125 | .1498 | .8502 | 1122 | 12734 | 36133 | 1114 | 12750 | 36125 | 11   | .08   |
| 50000 | 1.00 | .15 | .8500 | 1125 | 12750 | 36125 | .1500 | .8500 | 1125 | 12750 | 36125 | 1125 | 12750 | 36125 | 0    | .00   |
| 50000 | 1.01 | .15 | .8500 | 1125 | 12750 | 36125 | .1502 | .8498 | 1128 | 12766 | 36117 | 1136 | 12750 | 36125 | -11  | .08   |
| 50000 | 1.02 | .15 | .8500 | 1125 | 12750 | 36125 | .1504 | .8496 | 1131 | 12782 | 36109 | 1148 | 12750 | 36125 | -23  | .32   |
| 50000 | 1.03 | .15 | .8500 | 1125 | 12750 | 36125 | .1506 | .8494 | 1134 | 12799 | 36101 | 1159 | 12750 | 36125 | -34  | .73   |
| 50000 | 1.04 | .15 | .8500 | 1125 | 12750 | 36125 | .1508 | .8492 | 1138 | 12815 | 36093 | 1170 | 12750 | 36125 | -45  | 1.29  |
| 50000 | 1.05 | .15 | .8500 | 1125 | 12750 | 36125 | .1510 | .8490 | 1141 | 12831 | 36084 | 1181 | 12750 | 36125 | -56  | 2.00  |
| 50000 | 1.06 | .15 | .8500 | 1125 | 12750 | 36125 | .1511 | .8489 | 1144 | 12847 | 36076 | 1193 | 12750 | 36125 | -68  | 2.88  |
| 50000 | 1.07 | .15 | .8500 | 1125 | 12750 | 36125 | .1513 | .8487 | 1147 | 12864 | 36068 | 1204 | 12750 | 36125 | -79  | 3.91  |
| 50000 | 1.08 | .15 | .8500 | 1125 | 12750 | 36125 | .1515 | .8485 | 1150 | 12880 | 36060 | 1215 | 12750 | 36125 | -90  | 5.09  |
| 50000 | 1.09 | .15 | .8500 | 1125 | 12750 | 36125 | .1517 | .8483 | 1153 | 12896 | 36052 | 1226 | 12750 | 36125 | -101 | 6.42  |
| 50000 | 1.10 | .15 | .8500 | 1125 | 12750 | 36125 | .1519 | .8481 | 1156 | 12912 | 36044 | 1238 | 12750 | 36125 | -113 | 7.91  |
| 50000 | 1.11 | .15 | .8500 | 1125 | 12750 | 36125 | .1521 | .8479 | 1160 | 12928 | 36036 | 1249 | 12750 | 36125 | -124 | 9.54  |
| 50000 | 1.12 | .15 | .8500 | 1125 | 12750 | 36125 | .1523 | .8477 | 1163 | 12945 | 36028 | 1260 | 12750 | 36125 | -135 | 11.32 |
| 50000 | 1.13 | .15 | .8500 | 1125 | 12750 | 36125 | .1525 | .8475 | 1166 | 12961 | 36020 | 1271 | 12750 | 36125 | -146 | 13.25 |
| 50000 | 1.14 | .15 | .8500 | 1125 | 12750 | 36125 | .1527 | .8473 | 1169 | 12977 | 36012 | 1283 | 12750 | 36125 | -158 | 15.33 |
| 50000 | 1.15 | .15 | .8500 | 1125 | 12750 | 36125 | .1529 | .8471 | 1172 | 12993 | 36003 | 1294 | 12750 | 36125 | -169 | 17.55 |
| 50000 | 1.16 | .15 | .8500 | 1125 | 12750 | 36125 | .1530 | .8470 | 1175 | 13009 | 35995 | 1305 | 12750 | 36125 | -180 | 19.92 |
| 50000 | 1.17 | .15 | .8500 | 1125 | 12750 | 36125 | .1532 | .8468 | 1179 | 13025 | 35987 | 1316 | 12750 | 36125 | -191 | 22.42 |
| 50000 | 1.18 | .15 | .8500 | 1125 | 12750 | 36125 | .1534 | .8466 | 1182 | 13041 | 35979 | 1328 | 12750 | 36125 | -203 | 25.07 |

|       |      |     |       |      |       |       |       |       |      |       |       |      |       |       |      |       |
|-------|------|-----|-------|------|-------|-------|-------|-------|------|-------|-------|------|-------|-------|------|-------|
| 50000 | 1.19 | .15 | .8500 | 1125 | 12750 | 36125 | .1536 | .8464 | 1185 | 13058 | 35971 | 1339 | 12750 | 36125 | -214 | 27.86 |
| 50000 | 1.20 | .15 | .8500 | 1125 | 12750 | 36125 | .1538 | .8462 | 1188 | 13074 | 35963 | 1350 | 12750 | 36125 | -225 | 30.78 |
| 50000 | .80  | .20 | .8000 | 2000 | 16000 | 32000 | .1935 | .8065 | 1858 | 15484 | 32258 | 1600 | 16000 | 32000 | 400  | 55.11 |
| 50000 | .81  | .20 | .8000 | 2000 | 16000 | 32000 | .1939 | .8061 | 1865 | 15510 | 32245 | 1620 | 16000 | 32000 | 380  | 49.55 |
| 50000 | .82  | .20 | .8000 | 2000 | 16000 | 32000 | .1942 | .8058 | 1872 | 15536 | 32232 | 1640 | 16000 | 32000 | 360  | 44.31 |
| 50000 | .83  | .20 | .8000 | 2000 | 16000 | 32000 | .1945 | .8055 | 1879 | 15562 | 32219 | 1660 | 16000 | 32000 | 340  | 39.37 |
| 50000 | .84  | .20 | .8000 | 2000 | 16000 | 32000 | .1948 | .8052 | 1886 | 15588 | 32206 | 1680 | 16000 | 32000 | 320  | 34.75 |
| 50000 | .85  | .20 | .8000 | 2000 | 16000 | 32000 | .1952 | .8048 | 1893 | 15614 | 32193 | 1700 | 16000 | 32000 | 300  | 30.43 |
| 50000 | .86  | .20 | .8000 | 2000 | 16000 | 32000 | .1955 | .8045 | 1900 | 15640 | 32180 | 1720 | 16000 | 32000 | 280  | 26.41 |
| 50000 | .87  | .20 | .8000 | 2000 | 16000 | 32000 | .1958 | .8042 | 1907 | 15665 | 32167 | 1740 | 16000 | 32000 | 260  | 22.68 |
| 50000 | .88  | .20 | .8000 | 2000 | 16000 | 32000 | .1961 | .8039 | 1914 | 15691 | 32154 | 1760 | 16000 | 32000 | 240  | 19.26 |
| 50000 | .89  | .20 | .8000 | 2000 | 16000 | 32000 | .1965 | .8035 | 1921 | 15717 | 32141 | 1780 | 16000 | 32000 | 220  | 16.12 |
| 50000 | .90  | .20 | .8000 | 2000 | 16000 | 32000 | .1968 | .8032 | 1929 | 15743 | 32129 | 1800 | 16000 | 32000 | 200  | 13.27 |
| 50000 | .91  | .20 | .8000 | 2000 | 16000 | 32000 | .1971 | .8029 | 1936 | 15769 | 32116 | 1820 | 16000 | 32000 | 180  | 10.71 |
| 50000 | .92  | .20 | .8000 | 2000 | 16000 | 32000 | .1974 | .8026 | 1943 | 15795 | 32103 | 1840 | 16000 | 32000 | 160  | 8.43  |
| 50000 | .93  | .20 | .8000 | 2000 | 16000 | 32000 | .1978 | .8022 | 1950 | 15820 | 32090 | 1860 | 16000 | 32000 | 140  | 6.43  |
| 50000 | .94  | .20 | .8000 | 2000 | 16000 | 32000 | .1981 | .8019 | 1957 | 15846 | 32077 | 1880 | 16000 | 32000 | 120  | 4.71  |
| 50000 | .95  | .20 | .8000 | 2000 | 16000 | 32000 | .1984 | .8016 | 1964 | 15872 | 32064 | 1900 | 16000 | 32000 | 100  | 3.26  |
| 50000 | .96  | .20 | .8000 | 2000 | 16000 | 32000 | .1987 | .8013 | 1971 | 15897 | 32051 | 1920 | 16000 | 32000 | 80   | 2.08  |
| 50000 | .97  | .20 | .8000 | 2000 | 16000 | 32000 | .1990 | .8010 | 1978 | 15923 | 32038 | 1940 | 16000 | 32000 | 60   | 1.16  |
| 50000 | .98  | .20 | .8000 | 2000 | 16000 | 32000 | .1994 | .8006 | 1986 | 15949 | 32026 | 1960 | 16000 | 32000 | 40   | .52   |
| 50000 | .99  | .20 | .8000 | 2000 | 16000 | 32000 | .1997 | .8003 | 1993 | 15974 | 32013 | 1980 | 16000 | 32000 | 20   | .13   |
| 50000 | 1.00 | .20 | .8000 | 2000 | 16000 | 32000 | .2000 | .8000 | 2000 | 16000 | 32000 | 2000 | 16000 | 32000 | 0    | .00   |
| 50000 | 1.01 | .20 | .8000 | 2000 | 16000 | 32000 | .2003 | .7997 | 2007 | 16026 | 31987 | 2020 | 16000 | 32000 | -20  | .13   |
| 50000 | 1.02 | .20 | .8000 | 2000 | 16000 | 32000 | .2006 | .7994 | 2014 | 16051 | 31974 | 2040 | 16000 | 32000 | -40  | .51   |
| 50000 | 1.03 | .20 | .8000 | 2000 | 16000 | 32000 | .2010 | .7990 | 2022 | 16077 | 31962 | 2060 | 16000 | 32000 | -60  | 1.14  |
| 50000 | 1.04 | .20 | .8000 | 2000 | 16000 | 32000 | .2013 | .7987 | 2029 | 16102 | 31949 | 2080 | 16000 | 32000 | -80  | 2.02  |
| 50000 | 1.05 | .20 | .8000 | 2000 | 16000 | 32000 | .2016 | .7984 | 2036 | 16128 | 31936 | 2100 | 16000 | 32000 | -100 | 3.14  |
| 50000 | 1.06 | .20 | .8000 | 2000 | 16000 | 32000 | .2019 | .7981 | 2043 | 16153 | 31923 | 2120 | 16000 | 32000 | -120 | 4.51  |
| 50000 | 1.07 | .20 | .8000 | 2000 | 16000 | 32000 | .2022 | .7978 | 2051 | 16179 | 31911 | 2140 | 16000 | 32000 | -140 | 6.12  |
| 50000 | 1.08 | .20 | .8000 | 2000 | 16000 | 32000 | .2026 | .7974 | 2058 | 16204 | 31898 | 2160 | 16000 | 32000 | -160 | 7.96  |
| 50000 | 1.09 | .20 | .8000 | 2000 | 16000 | 32000 | .2029 | .7971 | 2065 | 16230 | 31885 | 2180 | 16000 | 32000 | -180 | 10.04 |
| 50000 | 1.10 | .20 | .8000 | 2000 | 16000 | 32000 | .2032 | .7968 | 2073 | 16255 | 31873 | 2200 | 16000 | 32000 | -200 | 12.35 |

|       |      |     |       |      |       |       |       |       |      |       |       |      |       |       |      |       |
|-------|------|-----|-------|------|-------|-------|-------|-------|------|-------|-------|------|-------|-------|------|-------|
| 50000 | 1.11 | .20 | .8000 | 2000 | 16000 | 32000 | .2035 | .7965 | 2080 | 16280 | 31860 | 2220 | 16000 | 32000 | -220 | 14.89 |
| 50000 | 1.12 | .20 | .8000 | 2000 | 16000 | 32000 | .2038 | .7962 | 2087 | 16306 | 31847 | 2240 | 16000 | 32000 | -240 | 17.66 |
| 50000 | 1.13 | .20 | .8000 | 2000 | 16000 | 32000 | .2041 | .7959 | 2094 | 16331 | 31834 | 2260 | 16000 | 32000 | -260 | 20.66 |
| 50000 | 1.14 | .20 | .8000 | 2000 | 16000 | 32000 | .2045 | .7955 | 2102 | 16356 | 31822 | 2280 | 16000 | 32000 | -280 | 23.87 |
| 50000 | 1.15 | .20 | .8000 | 2000 | 16000 | 32000 | .2048 | .7952 | 2109 | 16382 | 31809 | 2300 | 16000 | 32000 | -300 | 27.31 |
| 50000 | 1.16 | .20 | .8000 | 2000 | 16000 | 32000 | .2051 | .7949 | 2117 | 16407 | 31797 | 2320 | 16000 | 32000 | -320 | 30.96 |
| 50000 | 1.17 | .20 | .8000 | 2000 | 16000 | 32000 | .2054 | .7946 | 2124 | 16432 | 31784 | 2340 | 16000 | 32000 | -340 | 34.83 |
| 50000 | 1.18 | .20 | .8000 | 2000 | 16000 | 32000 | .2057 | .7943 | 2131 | 16458 | 31771 | 2360 | 16000 | 32000 | -360 | 38.92 |
| 50000 | 1.19 | .20 | .8000 | 2000 | 16000 | 32000 | .2060 | .7940 | 2139 | 16483 | 31759 | 2380 | 16000 | 32000 | -380 | 43.21 |
| 50000 | 1.20 | .20 | .8000 | 2000 | 16000 | 32000 | .2063 | .7937 | 2146 | 16508 | 31746 | 2400 | 16000 | 32000 | -400 | 47.72 |
| 50000 | .80  | .25 | .7500 | 3125 | 18750 | 28125 | .2405 | .7595 | 2856 | 18038 | 28481 | 2500 | 18750 | 28125 | 625  | 76.93 |
| 50000 | .81  | .25 | .7500 | 3125 | 18750 | 28125 | .2410 | .7590 | 2869 | 18074 | 28463 | 2531 | 18750 | 28125 | 594  | 69.11 |
| 50000 | .82  | .25 | .7500 | 3125 | 18750 | 28125 | .2415 | .7585 | 2883 | 18110 | 28445 | 2563 | 18750 | 28125 | 563  | 61.74 |
| 50000 | .83  | .25 | .7500 | 3125 | 18750 | 28125 | .2419 | .7581 | 2896 | 18146 | 28427 | 2594 | 18750 | 28125 | 531  | 54.82 |
| 50000 | .84  | .25 | .7500 | 3125 | 18750 | 28125 | .2424 | .7576 | 2909 | 18182 | 28409 | 2625 | 18750 | 28125 | 500  | 48.34 |
| 50000 | .85  | .25 | .7500 | 3125 | 18750 | 28125 | .2429 | .7571 | 2922 | 18218 | 28391 | 2656 | 18750 | 28125 | 469  | 42.29 |
| 50000 | .86  | .25 | .7500 | 3125 | 18750 | 28125 | .2434 | .7566 | 2936 | 18253 | 28373 | 2688 | 18750 | 28125 | 438  | 36.67 |
| 50000 | .87  | .25 | .7500 | 3125 | 18750 | 28125 | .2439 | .7561 | 2949 | 18289 | 28355 | 2719 | 18750 | 28125 | 406  | 31.48 |
| 50000 | .88  | .25 | .7500 | 3125 | 18750 | 28125 | .2443 | .7557 | 2963 | 18325 | 28338 | 2750 | 18750 | 28125 | 375  | 26.70 |
| 50000 | .89  | .25 | .7500 | 3125 | 18750 | 28125 | .2448 | .7552 | 2976 | 18361 | 28320 | 2781 | 18750 | 28125 | 344  | 22.33 |
| 50000 | .90  | .25 | .7500 | 3125 | 18750 | 28125 | .2453 | .7547 | 2989 | 18396 | 28302 | 2813 | 18750 | 28125 | 313  | 18.38 |
| 50000 | .91  | .25 | .7500 | 3125 | 18750 | 28125 | .2458 | .7542 | 3003 | 18432 | 28284 | 2844 | 18750 | 28125 | 281  | 14.82 |
| 50000 | .92  | .25 | .7500 | 3125 | 18750 | 28125 | .2462 | .7538 | 3016 | 18467 | 28266 | 2875 | 18750 | 28125 | 250  | 11.66 |
| 50000 | .93  | .25 | .7500 | 3125 | 18750 | 28125 | .2467 | .7533 | 3030 | 18503 | 28249 | 2906 | 18750 | 28125 | 219  | 8.88  |
| 50000 | .94  | .25 | .7500 | 3125 | 18750 | 28125 | .2472 | .7528 | 3043 | 18538 | 28231 | 2938 | 18750 | 28125 | 188  | 6.50  |
| 50000 | .95  | .25 | .7500 | 3125 | 18750 | 28125 | .2476 | .7524 | 3057 | 18574 | 28213 | 2969 | 18750 | 28125 | 156  | 4.49  |
| 50000 | .96  | .25 | .7500 | 3125 | 18750 | 28125 | .2481 | .7519 | 3070 | 18609 | 28195 | 3000 | 18750 | 28125 | 125  | 2.86  |
| 50000 | .97  | .25 | .7500 | 3125 | 18750 | 28125 | .2486 | .7514 | 3084 | 18644 | 28178 | 3031 | 18750 | 28125 | 94   | 1.60  |
| 50000 | .98  | .25 | .7500 | 3125 | 18750 | 28125 | .2491 | .7509 | 3098 | 18680 | 28160 | 3063 | 18750 | 28125 | 63   | .71   |
| 50000 | .99  | .25 | .7500 | 3125 | 18750 | 28125 | .2495 | .7505 | 3111 | 18715 | 28143 | 3094 | 18750 | 28125 | 31   | .18   |
| 50000 | 1.00 | .25 | .7500 | 3125 | 18750 | 28125 | .2500 | .7500 | 3125 | 18750 | 28125 | 3125 | 18750 | 28125 | 0    | .00   |
| 50000 | 1.01 | .25 | .7500 | 3125 | 18750 | 28125 | .2505 | .7495 | 3139 | 18785 | 28107 | 3156 | 18750 | 28125 | -31  | .18   |
| 50000 | 1.02 | .25 | .7500 | 3125 | 18750 | 28125 | .2509 | .7491 | 3152 | 18820 | 28090 | 3188 | 18750 | 28125 | -63  | .70   |

|       |      |     |       |      |       |       |       |       |      |       |       |      |       |       |      |       |
|-------|------|-----|-------|------|-------|-------|-------|-------|------|-------|-------|------|-------|-------|------|-------|
| 50000 | 1.03 | .25 | .7500 | 3125 | 18750 | 28125 | .2514 | .7486 | 3166 | 18855 | 28072 | 3219 | 18750 | 28125 | -94  | 1.56  |
| 50000 | 1.04 | .25 | .7500 | 3125 | 18750 | 28125 | .2519 | .7481 | 3180 | 18890 | 28055 | 3250 | 18750 | 28125 | -125 | 2.76  |
| 50000 | 1.05 | .25 | .7500 | 3125 | 18750 | 28125 | .2523 | .7477 | 3194 | 18925 | 28037 | 3281 | 18750 | 28125 | -156 | 4.30  |
| 50000 | 1.06 | .25 | .7500 | 3125 | 18750 | 28125 | .2528 | .7472 | 3207 | 18960 | 28020 | 3313 | 18750 | 28125 | -188 | 6.17  |
| 50000 | 1.07 | .25 | .7500 | 3125 | 18750 | 28125 | .2533 | .7467 | 3221 | 18995 | 28002 | 3344 | 18750 | 28125 | -219 | 8.36  |
| 50000 | 1.08 | .25 | .7500 | 3125 | 18750 | 28125 | .2537 | .7463 | 3235 | 19030 | 27985 | 3375 | 18750 | 28125 | -250 | 10.87 |
| 50000 | 1.09 | .25 | .7500 | 3125 | 18750 | 28125 | .2542 | .7458 | 3249 | 19065 | 27968 | 3406 | 18750 | 28125 | -281 | 13.70 |
| 50000 | 1.10 | .25 | .7500 | 3125 | 18750 | 28125 | .2547 | .7453 | 3263 | 19099 | 27950 | 3438 | 18750 | 28125 | -313 | 16.84 |
| 50000 | 1.11 | .25 | .7500 | 3125 | 18750 | 28125 | .2551 | .7449 | 3277 | 19134 | 27933 | 3469 | 18750 | 28125 | -344 | 20.28 |
| 50000 | 1.12 | .25 | .7500 | 3125 | 18750 | 28125 | .2556 | .7444 | 3291 | 19169 | 27916 | 3500 | 18750 | 28125 | -375 | 24.04 |
| 50000 | 1.13 | .25 | .7500 | 3125 | 18750 | 28125 | .2560 | .7440 | 3305 | 19203 | 27898 | 3531 | 18750 | 28125 | -406 | 28.09 |
| 50000 | 1.14 | .25 | .7500 | 3125 | 18750 | 28125 | .2565 | .7435 | 3319 | 19238 | 27881 | 3563 | 18750 | 28125 | -438 | 32.44 |
| 50000 | 1.15 | .25 | .7500 | 3125 | 18750 | 28125 | .2570 | .7430 | 3333 | 19272 | 27864 | 3594 | 18750 | 28125 | -469 | 37.09 |
| 50000 | 1.16 | .25 | .7500 | 3125 | 18750 | 28125 | .2574 | .7426 | 3347 | 19307 | 27847 | 3625 | 18750 | 28125 | -500 | 42.02 |
| 50000 | 1.17 | .25 | .7500 | 3125 | 18750 | 28125 | .2579 | .7421 | 3361 | 19341 | 27829 | 3656 | 18750 | 28125 | -531 | 47.24 |
| 50000 | 1.18 | .25 | .7500 | 3125 | 18750 | 28125 | .2583 | .7417 | 3375 | 19376 | 27812 | 3688 | 18750 | 28125 | -563 | 52.74 |
| 50000 | 1.19 | .25 | .7500 | 3125 | 18750 | 28125 | .2588 | .7412 | 3389 | 19410 | 27795 | 3719 | 18750 | 28125 | -594 | 58.52 |
| 50000 | 1.20 | .25 | .7500 | 3125 | 18750 | 28125 | .2593 | .7407 | 3403 | 19444 | 27778 | 3750 | 18750 | 28125 | -625 | 64.57 |
| 50000 | .80  | .30 | .7000 | 4500 | 21000 | 24500 | .2872 | .7128 | 4049 | 20102 | 24949 | 3600 | 21000 | 24500 | 900  | 98.02 |
| 50000 | .81  | .30 | .7000 | 4500 | 21000 | 24500 | .2878 | .7122 | 4071 | 20148 | 24926 | 3645 | 21000 | 24500 | 855  | 87.98 |
| 50000 | .82  | .30 | .7000 | 4500 | 21000 | 24500 | .2885 | .7115 | 4093 | 20193 | 24903 | 3690 | 21000 | 24500 | 810  | 78.54 |
| 50000 | .83  | .30 | .7000 | 4500 | 21000 | 24500 | .2891 | .7109 | 4116 | 20239 | 24881 | 3735 | 21000 | 24500 | 765  | 69.68 |
| 50000 | .84  | .30 | .7000 | 4500 | 21000 | 24500 | .2898 | .7102 | 4138 | 20284 | 24858 | 3780 | 21000 | 24500 | 720  | 61.39 |
| 50000 | .85  | .30 | .7000 | 4500 | 21000 | 24500 | .2904 | .7096 | 4160 | 20329 | 24835 | 3825 | 21000 | 24500 | 675  | 53.66 |
| 50000 | .86  | .30 | .7000 | 4500 | 21000 | 24500 | .2911 | .7089 | 4183 | 20375 | 24813 | 3870 | 21000 | 24500 | 630  | 46.50 |
| 50000 | .87  | .30 | .7000 | 4500 | 21000 | 24500 | .2917 | .7083 | 4205 | 20420 | 24790 | 3915 | 21000 | 24500 | 585  | 39.88 |
| 50000 | .88  | .30 | .7000 | 4500 | 21000 | 24500 | .2924 | .7076 | 4227 | 20465 | 24767 | 3960 | 21000 | 24500 | 540  | 33.80 |
| 50000 | .89  | .30 | .7000 | 4500 | 21000 | 24500 | .2930 | .7070 | 4250 | 20510 | 24745 | 4005 | 21000 | 24500 | 495  | 28.25 |
| 50000 | .90  | .30 | .7000 | 4500 | 21000 | 24500 | .2936 | .7064 | 4273 | 20555 | 24723 | 4050 | 21000 | 24500 | 450  | 23.22 |
| 50000 | .91  | .30 | .7000 | 4500 | 21000 | 24500 | .2943 | .7057 | 4295 | 20600 | 24700 | 4095 | 21000 | 24500 | 405  | 18.71 |
| 50000 | .92  | .30 | .7000 | 4500 | 21000 | 24500 | .2949 | .7051 | 4318 | 20645 | 24678 | 4140 | 21000 | 24500 | 360  | 14.71 |
| 50000 | .93  | .30 | .7000 | 4500 | 21000 | 24500 | .2956 | .7044 | 4340 | 20689 | 24655 | 4185 | 21000 | 24500 | 315  | 11.20 |
| 50000 | .94  | .30 | .7000 | 4500 | 21000 | 24500 | .2962 | .7038 | 4363 | 20734 | 24633 | 4230 | 21000 | 24500 | 270  | 8.19  |

|       |      |     |       |      |       |       |       |       |      |       |       |      |       |       |      |        |
|-------|------|-----|-------|------|-------|-------|-------|-------|------|-------|-------|------|-------|-------|------|--------|
| 50000 | .95  | .30 | .7000 | 4500 | 21000 | 24500 | .2968 | .7032 | 4386 | 20779 | 24611 | 4275 | 21000 | 24500 | 225  | 5.66   |
| 50000 | .96  | .30 | .7000 | 4500 | 21000 | 24500 | .2975 | .7025 | 4409 | 20823 | 24589 | 4320 | 21000 | 24500 | 180  | 3.60   |
| 50000 | .97  | .30 | .7000 | 4500 | 21000 | 24500 | .2981 | .7019 | 4431 | 20867 | 24566 | 4365 | 21000 | 24500 | 135  | 2.02   |
| 50000 | .98  | .30 | .7000 | 4500 | 21000 | 24500 | .2987 | .7013 | 4454 | 20912 | 24544 | 4410 | 21000 | 24500 | 90   | .89    |
| 50000 | .99  | .30 | .7000 | 4500 | 21000 | 24500 | .2994 | .7006 | 4477 | 20956 | 24522 | 4455 | 21000 | 24500 | 45   | .22    |
| 50000 | 1.00 | .30 | .7000 | 4500 | 21000 | 24500 | .3000 | .7000 | 4500 | 21000 | 24500 | 4500 | 21000 | 24500 | 0    | .00    |
| 50000 | 1.01 | .30 | .7000 | 4500 | 21000 | 24500 | .3006 | .6994 | 4523 | 21044 | 24478 | 4545 | 21000 | 24500 | -45  | .22    |
| 50000 | 1.02 | .30 | .7000 | 4500 | 21000 | 24500 | .3013 | .6987 | 4546 | 21088 | 24456 | 4590 | 21000 | 24500 | -90  | .87    |
| 50000 | 1.03 | .30 | .7000 | 4500 | 21000 | 24500 | .3019 | .6981 | 4569 | 21132 | 24434 | 4635 | 21000 | 24500 | -135 | 1.95   |
| 50000 | 1.04 | .30 | .7000 | 4500 | 21000 | 24500 | .3025 | .6975 | 4592 | 21176 | 24412 | 4680 | 21000 | 24500 | -180 | 3.46   |
| 50000 | 1.05 | .30 | .7000 | 4500 | 21000 | 24500 | .3031 | .6969 | 4615 | 21220 | 24390 | 4725 | 21000 | 24500 | -225 | 5.37   |
| 50000 | 1.06 | .30 | .7000 | 4500 | 21000 | 24500 | .3038 | .6962 | 4638 | 21263 | 24368 | 4770 | 21000 | 24500 | -270 | 7.70   |
| 50000 | 1.07 | .30 | .7000 | 4500 | 21000 | 24500 | .3044 | .6956 | 4662 | 21307 | 24347 | 4815 | 21000 | 24500 | -315 | 10.43  |
| 50000 | 1.08 | .30 | .7000 | 4500 | 21000 | 24500 | .3050 | .6950 | 4685 | 21350 | 24325 | 4860 | 21000 | 24500 | -360 | 13.56  |
| 50000 | 1.09 | .30 | .7000 | 4500 | 21000 | 24500 | .3056 | .6944 | 4708 | 21394 | 24303 | 4905 | 21000 | 24500 | -405 | 17.07  |
| 50000 | 1.10 | .30 | .7000 | 4500 | 21000 | 24500 | .3062 | .6938 | 4731 | 21437 | 24281 | 4950 | 21000 | 24500 | -450 | 20.97  |
| 50000 | 1.11 | .30 | .7000 | 4500 | 21000 | 24500 | .3069 | .6931 | 4755 | 21480 | 24260 | 4995 | 21000 | 24500 | -495 | 25.25  |
| 50000 | 1.12 | .30 | .7000 | 4500 | 21000 | 24500 | .3075 | .6925 | 4778 | 21524 | 24238 | 5040 | 21000 | 24500 | -540 | 29.90  |
| 50000 | 1.13 | .30 | .7000 | 4500 | 21000 | 24500 | .3081 | .6919 | 4802 | 21567 | 24217 | 5085 | 21000 | 24500 | -585 | 34.92  |
| 50000 | 1.14 | .30 | .7000 | 4500 | 21000 | 24500 | .3087 | .6913 | 4825 | 21610 | 24195 | 5130 | 21000 | 24500 | -630 | 40.31  |
| 50000 | 1.15 | .30 | .7000 | 4500 | 21000 | 24500 | .3093 | .6907 | 4849 | 21653 | 24174 | 5175 | 21000 | 24500 | -675 | 46.04  |
| 50000 | 1.16 | .30 | .7000 | 4500 | 21000 | 24500 | .3099 | .6901 | 4872 | 21696 | 24152 | 5220 | 21000 | 24500 | -720 | 52.14  |
| 50000 | 1.17 | .30 | .7000 | 4500 | 21000 | 24500 | .3105 | .6895 | 4896 | 21738 | 24131 | 5265 | 21000 | 24500 | -765 | 58.57  |
| 50000 | 1.18 | .30 | .7000 | 4500 | 21000 | 24500 | .3112 | .6888 | 4919 | 21781 | 24109 | 5310 | 21000 | 24500 | -810 | 65.35  |
| 50000 | 1.19 | .30 | .7000 | 4500 | 21000 | 24500 | .3118 | .6882 | 4943 | 21824 | 24088 | 5355 | 21000 | 24500 | -855 | 72.47  |
| 50000 | 1.20 | .30 | .7000 | 4500 | 21000 | 24500 | .3124 | .6876 | 4967 | 21866 | 24067 | 5400 | 21000 | 24500 | -900 | 79.91  |
| 50000 | .80  | .35 | .6500 | 6125 | 22750 | 21125 | .3337 | .6663 | 5431 | 21689 | 21656 | 4900 | 22750 | 21125 | 1225 | 116.75 |
| 50000 | .81  | .35 | .6500 | 6125 | 22750 | 21125 | .3345 | .6655 | 5465 | 21743 | 21628 | 4961 | 22750 | 21125 | 1164 | 104.71 |
| 50000 | .82  | .35 | .6500 | 6125 | 22750 | 21125 | .3353 | .6647 | 5499 | 21797 | 21601 | 5023 | 22750 | 21125 | 1103 | 93.39  |
| 50000 | .83  | .35 | .6500 | 6125 | 22750 | 21125 | .3362 | .6638 | 5533 | 21851 | 21574 | 5084 | 22750 | 21125 | 1041 | 82.79  |
| 50000 | .84  | .35 | .6500 | 6125 | 22750 | 21125 | .3370 | .6630 | 5567 | 21905 | 21547 | 5145 | 22750 | 21125 | 980  | 72.88  |

|       |      |     |       |      |       |       |       |       |      |       |       |      |       |       |       |       |
|-------|------|-----|-------|------|-------|-------|-------|-------|------|-------|-------|------|-------|-------|-------|-------|
| 50000 | .85  | .35 | .6500 | 6125 | 22750 | 21125 | .3378 | .6622 | 5602 | 21959 | 21520 | 5206 | 22750 | 21125 | 919   | 63.67 |
| 50000 | .86  | .35 | .6500 | 6125 | 22750 | 21125 | .3387 | .6613 | 5636 | 22013 | 21494 | 5268 | 22750 | 21125 | 858   | 55.12 |
| 50000 | .87  | .35 | .6500 | 6125 | 22750 | 21125 | .3395 | .6605 | 5671 | 22066 | 21467 | 5329 | 22750 | 21125 | 796   | 47.24 |
| 50000 | .88  | .35 | .6500 | 6125 | 22750 | 21125 | .3403 | .6597 | 5705 | 22120 | 21440 | 5390 | 22750 | 21125 | 735   | 40.01 |
| 50000 | .89  | .35 | .6500 | 6125 | 22750 | 21125 | .3411 | .6589 | 5740 | 22173 | 21414 | 5451 | 22750 | 21125 | 674   | 33.41 |
| 50000 | .90  | .35 | .6500 | 6125 | 22750 | 21125 | .3419 | .6581 | 5774 | 22226 | 21387 | 5513 | 22750 | 21125 | 613   | 27.45 |
| 50000 | .91  | .35 | .6500 | 6125 | 22750 | 21125 | .3428 | .6572 | 5809 | 22279 | 21360 | 5574 | 22750 | 21125 | 551   | 22.10 |
| 50000 | .92  | .35 | .6500 | 6125 | 22750 | 21125 | .3436 | .6564 | 5844 | 22332 | 21334 | 5635 | 22750 | 21125 | 490   | 17.36 |
| 50000 | .93  | .35 | .6500 | 6125 | 22750 | 21125 | .3444 | .6556 | 5879 | 22385 | 21308 | 5696 | 22750 | 21125 | 429   | 13.21 |
| 50000 | .94  | .35 | .6500 | 6125 | 22750 | 21125 | .3452 | .6548 | 5914 | 22437 | 21281 | 5758 | 22750 | 21125 | 368   | 9.65  |
| 50000 | .95  | .35 | .6500 | 6125 | 22750 | 21125 | .3460 | .6540 | 5949 | 22490 | 21255 | 5819 | 22750 | 21125 | 306   | 6.66  |
| 50000 | .96  | .35 | .6500 | 6125 | 22750 | 21125 | .3468 | .6532 | 5984 | 22542 | 21229 | 5880 | 22750 | 21125 | 245   | 4.24  |
| 50000 | .97  | .35 | .6500 | 6125 | 22750 | 21125 | .3476 | .6524 | 6019 | 22594 | 21203 | 5941 | 22750 | 21125 | 184   | 2.37  |
| 50000 | .98  | .35 | .6500 | 6125 | 22750 | 21125 | .3484 | .6516 | 6054 | 22646 | 21177 | 6003 | 22750 | 21125 | 123   | 1.05  |
| 50000 | .99  | .35 | .6500 | 6125 | 22750 | 21125 | .3492 | .6508 | 6090 | 22698 | 21151 | 6064 | 22750 | 21125 | 61    | .26   |
| 50000 | 1.00 | .35 | .6500 | 6125 | 22750 | 21125 | .3500 | .6500 | 6125 | 22750 | 21125 | 6125 | 22750 | 21125 | 0     | .00   |
| 50000 | 1.01 | .35 | .6500 | 6125 | 22750 | 21125 | .3508 | .6492 | 6160 | 22802 | 21099 | 6186 | 22750 | 21125 | -61   | .26   |
| 50000 | 1.02 | .35 | .6500 | 6125 | 22750 | 21125 | .3516 | .6484 | 6196 | 22853 | 21073 | 6248 | 22750 | 21125 | -123  | 1.02  |
| 50000 | 1.03 | .35 | .6500 | 6125 | 22750 | 21125 | .3524 | .6476 | 6231 | 22905 | 21048 | 6309 | 22750 | 21125 | -184  | 2.29  |
| 50000 | 1.04 | .35 | .6500 | 6125 | 22750 | 21125 | .3532 | .6468 | 6267 | 22956 | 21022 | 6370 | 22750 | 21125 | -245  | 4.05  |
| 50000 | 1.05 | .35 | .6500 | 6125 | 22750 | 21125 | .3540 | .6460 | 6303 | 23007 | 20996 | 6431 | 22750 | 21125 | -306  | 6.29  |
| 50000 | 1.06 | .35 | .6500 | 6125 | 22750 | 21125 | .3547 | .6453 | 6338 | 23058 | 20971 | 6493 | 22750 | 21125 | -368  | 9.00  |
| 50000 | 1.07 | .35 | .6500 | 6125 | 22750 | 21125 | .3555 | .6445 | 6374 | 23109 | 20945 | 6554 | 22750 | 21125 | -429  | 12.18 |
| 50000 | 1.08 | .35 | .6500 | 6125 | 22750 | 21125 | .3563 | .6437 | 6410 | 23160 | 20920 | 6615 | 22750 | 21125 | -490  | 15.83 |
| 50000 | 1.09 | .35 | .6500 | 6125 | 22750 | 21125 | .3571 | .6429 | 6446 | 23211 | 20895 | 6676 | 22750 | 21125 | -551  | 19.92 |
| 50000 | 1.10 | .35 | .6500 | 6125 | 22750 | 21125 | .3579 | .6421 | 6482 | 23261 | 20869 | 6738 | 22750 | 21125 | -613  | 24.45 |
| 50000 | 1.11 | .35 | .6500 | 6125 | 22750 | 21125 | .3586 | .6414 | 6518 | 23312 | 20844 | 6799 | 22750 | 21125 | -674  | 29.43 |
| 50000 | 1.12 | .35 | .6500 | 6125 | 22750 | 21125 | .3594 | .6406 | 6554 | 23362 | 20819 | 6860 | 22750 | 21125 | -735  | 34.83 |
| 50000 | 1.13 | .35 | .6500 | 6125 | 22750 | 21125 | .3602 | .6398 | 6590 | 23412 | 20794 | 6921 | 22750 | 21125 | -796  | 40.65 |
| 50000 | 1.14 | .35 | .6500 | 6125 | 22750 | 21125 | .3610 | .6390 | 6626 | 23462 | 20769 | 6983 | 22750 | 21125 | -858  | 46.88 |
| 50000 | 1.15 | .35 | .6500 | 6125 | 22750 | 21125 | .3617 | .6383 | 6663 | 23512 | 20744 | 7044 | 22750 | 21125 | -919  | 53.53 |
| 50000 | 1.16 | .35 | .6500 | 6125 | 22750 | 21125 | .3625 | .6375 | 6699 | 23562 | 20719 | 7105 | 22750 | 21125 | -980  | 60.57 |
| 50000 | 1.17 | .35 | .6500 | 6125 | 22750 | 21125 | .3633 | .6367 | 6735 | 23612 | 20694 | 7166 | 22750 | 21125 | -1041 | 68.01 |

|       |      |     |       |      |       |       |       |       |      |       |       |      |       |       |       |        |
|-------|------|-----|-------|------|-------|-------|-------|-------|------|-------|-------|------|-------|-------|-------|--------|
| 50000 | 1.18 | .35 | .6500 | 6125 | 22750 | 21125 | .3640 | .6360 | 6772 | 23662 | 20669 | 7228 | 22750 | 21125 | -1103 | 75.84  |
| 50000 | 1.19 | .35 | .6500 | 6125 | 22750 | 21125 | .3648 | .6352 | 6808 | 23711 | 20644 | 7289 | 22750 | 21125 | -1164 | 84.04  |
| 50000 | 1.20 | .35 | .6500 | 6125 | 22750 | 21125 | .3655 | .6345 | 6845 | 23760 | 20620 | 7350 | 22750 | 21125 | -1225 | 92.63  |
| 50000 | .80  | .40 | .6000 | 8000 | 24000 | 18000 | .3802 | .6198 | 6995 | 22810 | 18595 | 6400 | 24000 | 18000 | 1600  | 131.75 |
| 50000 | .81  | .40 | .6000 | 8000 | 24000 | 18000 | .3812 | .6188 | 7044 | 22871 | 18564 | 6480 | 24000 | 18000 | 1520  | 118.07 |
| 50000 | .82  | .40 | .6000 | 8000 | 24000 | 18000 | .3822 | .6178 | 7094 | 22932 | 18534 | 6560 | 24000 | 18000 | 1440  | 105.23 |
| 50000 | .83  | .40 | .6000 | 8000 | 24000 | 18000 | .3832 | .6168 | 7143 | 22993 | 18503 | 6640 | 24000 | 18000 | 1360  | 93.21  |
| 50000 | .84  | .40 | .6000 | 8000 | 24000 | 18000 | .3842 | .6158 | 7193 | 23054 | 18473 | 6720 | 24000 | 18000 | 1280  | 82.00  |
| 50000 | .85  | .40 | .6000 | 8000 | 24000 | 18000 | .3852 | .6148 | 7243 | 23115 | 18443 | 6800 | 24000 | 18000 | 1200  | 71.58  |
| 50000 | .86  | .40 | .6000 | 8000 | 24000 | 18000 | .3863 | .6137 | 7292 | 23175 | 18412 | 6880 | 24000 | 18000 | 1120  | 61.92  |
| 50000 | .87  | .40 | .6000 | 8000 | 24000 | 18000 | .3873 | .6127 | 7342 | 23235 | 18382 | 6960 | 24000 | 18000 | 1040  | 53.03  |
| 50000 | .88  | .40 | .6000 | 8000 | 24000 | 18000 | .3883 | .6117 | 7392 | 23295 | 18352 | 7040 | 24000 | 18000 | 960   | 44.88  |
| 50000 | .89  | .40 | .6000 | 8000 | 24000 | 18000 | .3893 | .6107 | 7442 | 23355 | 18322 | 7120 | 24000 | 18000 | 880   | 37.46  |
| 50000 | .90  | .40 | .6000 | 8000 | 24000 | 18000 | .3902 | .6098 | 7493 | 23415 | 18293 | 7200 | 24000 | 18000 | 800   | 30.75  |
| 50000 | .91  | .40 | .6000 | 8000 | 24000 | 18000 | .3912 | .6088 | 7543 | 23474 | 18263 | 7280 | 24000 | 18000 | 720   | 24.74  |
| 50000 | .92  | .40 | .6000 | 8000 | 24000 | 18000 | .3922 | .6078 | 7593 | 23533 | 18233 | 7360 | 24000 | 18000 | 640   | 19.42  |
| 50000 | .93  | .40 | .6000 | 8000 | 24000 | 18000 | .3932 | .6068 | 7644 | 23592 | 18204 | 7440 | 24000 | 18000 | 560   | 14.77  |
| 50000 | .94  | .40 | .6000 | 8000 | 24000 | 18000 | .3942 | .6058 | 7694 | 23651 | 18174 | 7520 | 24000 | 18000 | 480   | 10.78  |
| 50000 | .95  | .40 | .6000 | 8000 | 24000 | 18000 | .3952 | .6048 | 7745 | 23710 | 18145 | 7600 | 24000 | 18000 | 400   | 7.44   |
| 50000 | .96  | .40 | .6000 | 8000 | 24000 | 18000 | .3961 | .6039 | 7796 | 23768 | 18116 | 7680 | 24000 | 18000 | 320   | 4.73   |
| 50000 | .97  | .40 | .6000 | 8000 | 24000 | 18000 | .3971 | .6029 | 7847 | 23826 | 18087 | 7760 | 24000 | 18000 | 240   | 2.64   |
| 50000 | .98  | .40 | .6000 | 8000 | 24000 | 18000 | .3981 | .6019 | 7898 | 23884 | 18058 | 7840 | 24000 | 18000 | 160   | 1.17   |
| 50000 | .99  | .40 | .6000 | 8000 | 24000 | 18000 | .3990 | .6010 | 7949 | 23942 | 18029 | 7920 | 24000 | 18000 | 80    | .29    |
| 50000 | 1.00 | .40 | .6000 | 8000 | 24000 | 18000 | .4000 | .6000 | 8000 | 24000 | 18000 | 8000 | 24000 | 18000 | 0     | .00    |
| 50000 | 1.01 | .40 | .6000 | 8000 | 24000 | 18000 | .4010 | .5990 | 8051 | 24058 | 17971 | 8080 | 24000 | 18000 | -80   | .29    |
| 50000 | 1.02 | .40 | .6000 | 8000 | 24000 | 18000 | .4019 | .5981 | 8103 | 24115 | 17943 | 8160 | 24000 | 18000 | -160  | 1.14   |
| 50000 | 1.03 | .40 | .6000 | 8000 | 24000 | 18000 | .4029 | .5971 | 8154 | 24172 | 17914 | 8240 | 24000 | 18000 | -240  | 2.54   |
| 50000 | 1.04 | .40 | .6000 | 8000 | 24000 | 18000 | .4038 | .5962 | 8206 | 24229 | 17886 | 8320 | 24000 | 18000 | -320  | 4.49   |
| 50000 | 1.05 | .40 | .6000 | 8000 | 24000 | 18000 | .4048 | .5952 | 8257 | 24286 | 17857 | 8400 | 24000 | 18000 | -400  | 6.98   |
| 50000 | 1.06 | .40 | .6000 | 8000 | 24000 | 18000 | .4057 | .5943 | 8309 | 24342 | 17829 | 8480 | 24000 | 18000 | -480  | 9.98   |



|       |      |     |       |       |       |       |       |       |      |       |       |      |       |       |       |            |
|-------|------|-----|-------|-------|-------|-------|-------|-------|------|-------|-------|------|-------|-------|-------|------------|
| 50000 | 1.07 | .40 | .6000 | 8000  | 24000 | 18000 | .4066 | .5934 | 8361 | 24399 | 17801 | 8560 | 24000 | 18000 | -560  | 13.50      |
| 50000 | 1.08 | .40 | .6000 | 8000  | 24000 | 18000 | .4076 | .5924 | 8413 | 24455 | 17773 | 8640 | 24000 | 18000 | -640  | 17.53      |
| 50000 | 1.09 | .40 | .6000 | 8000  | 24000 | 18000 | .4085 | .5915 | 8464 | 24511 | 17744 | 8720 | 24000 | 18000 | -720  | 22.05      |
| 50000 | 1.10 | .40 | .6000 | 8000  | 24000 | 18000 | .4094 | .5906 | 8517 | 24567 | 17717 | 8800 | 24000 | 18000 | -800  | 27.05      |
| 50000 | 1.11 | .40 | .6000 | 8000  | 24000 | 18000 | .4104 | .5896 | 8569 | 24623 | 17689 | 8880 | 24000 | 18000 | -880  | 32.54      |
| 50000 | 1.12 | .40 | .6000 | 8000  | 24000 | 18000 | .4113 | .5887 | 8621 | 24678 | 17661 | 8960 | 24000 | 18000 | -960  | 38.49      |
| 50000 | 1.13 | .40 | .6000 | 8000  | 24000 | 18000 | .4122 | .5878 | 8673 | 24734 | 17633 | 9040 | 24000 | 18000 | -1040 | 44.89      |
| 50000 | 1.14 | .40 | .6000 | 8000  | 24000 | 18000 | .4131 | .5869 | 8726 | 24789 | 17606 | 9120 | 24000 | 18000 | -1120 | 51.75      |
| 50000 | 1.15 | .40 | .6000 | 8000  | 24000 | 18000 | .4141 | .5859 | 8778 | 24844 | 17578 | 9200 | 24000 | 18000 | -1200 | 59.06      |
| 50000 | 1.16 | .40 | .6000 | 8000  | 24000 | 18000 | .4150 | .5850 | 8831 | 24899 | 17551 | 9280 | 24000 | 18000 | -1280 | 66.79      |
| 50000 | 1.17 | .40 | .6000 | 8000  | 24000 | 18000 | .4159 | .5841 | 8883 | 24953 | 17523 | 9360 | 24000 | 18000 | -1360 | 74.96      |
| 50000 | 1.18 | .40 | .6000 | 8000  | 24000 | 18000 | .4168 | .5832 | 8936 | 25008 | 17496 | 9440 | 24000 | 18000 | -1440 | 83.54      |
| 50000 | 1.19 | .40 | .6000 | 8000  | 24000 | 18000 | .4177 | .5823 | 8989 | 25062 | 17469 | 9520 | 24000 | 18000 | -1520 | 92.53      |
| 50000 | 1.20 | .40 | .6000 | 8000  | 24000 | 18000 | .4186 | .5814 | 9042 | 25116 | 17442 | 9600 | 24000 | 18000 | -1600 | 101.9<br>3 |
| 50000 | .80  | .45 | .5500 | 10125 | 24750 | 15125 | .4268 | .5732 | 8738 | 23473 | 15763 | 8100 | 24750 | 15125 | 2025  | 141.9<br>5 |
| 50000 | .81  | .45 | .5500 | 10125 | 24750 | 15125 | .4280 | .5720 | 8806 | 23540 | 15730 | 8201 | 24750 | 15125 | 1924  | 127.1<br>2 |
| 50000 | .82  | .45 | .5500 | 10125 | 24750 | 15125 | .4292 | .5708 | 8875 | 23606 | 15697 | 8303 | 24750 | 15125 | 1823  | 113.2<br>2 |
| 50000 | .83  | .45 | .5500 | 10125 | 24750 | 15125 | .4304 | .5696 | 8943 | 23672 | 15664 | 8404 | 24750 | 15125 | 1721  | 100.2<br>1 |
| 50000 | .84  | .45 | .5500 | 10125 | 24750 | 15125 | .4316 | .5684 | 9011 | 23737 | 15631 | 8505 | 24750 | 15125 | 1620  | 88.10      |
| 50000 | .85  | .45 | .5500 | 10125 | 24750 | 15125 | .4328 | .5672 | 9080 | 23802 | 15599 | 8606 | 24750 | 15125 | 1519  | 76.84      |
| 50000 | .86  | .45 | .5500 | 10125 | 24750 | 15125 | .4340 | .5660 | 9149 | 23867 | 15566 | 8708 | 24750 | 15125 | 1418  | 66.44      |
| 50000 | .87  | .45 | .5500 | 10125 | 24750 | 15125 | .4351 | .5649 | 9218 | 23932 | 15534 | 8809 | 24750 | 15125 | 1316  | 56.86      |
| 50000 | .88  | .45 | .5500 | 10125 | 24750 | 15125 | .4363 | .5637 | 9287 | 23997 | 15502 | 8910 | 24750 | 15125 | 1215  | 48.09      |
| 50000 | .89  | .45 | .5500 | 10125 | 24750 | 15125 | .4375 | .5625 | 9356 | 24061 | 15470 | 9011 | 24750 | 15125 | 1114  | 40.11      |
| 50000 | .90  | .45 | .5500 | 10125 | 24750 | 15125 | .4386 | .5614 | 9425 | 24125 | 15438 | 9113 | 24750 | 15125 | 1013  | 32.90      |
| 50000 | .91  | .45 | .5500 | 10125 | 24750 | 15125 | .4398 | .5602 | 9495 | 24188 | 15406 | 9214 | 24750 | 15125 | 911   | 26.46      |
| 50000 | .92  | .45 | .5500 | 10125 | 24750 | 15125 | .4409 | .5591 | 9564 | 24252 | 15374 | 9315 | 24750 | 15125 | 810   | 20.75      |
| 50000 | .93  | .45 | .5500 | 10125 | 24750 | 15125 | .4421 | .5579 | 9634 | 24315 | 15342 | 9416 | 24750 | 15125 | 709   | 15.77      |

|       |      |     |       |       |       |       |       |       |       |       |       |       |       |       |       |        |
|-------|------|-----|-------|-------|-------|-------|-------|-------|-------|-------|-------|-------|-------|-------|-------|--------|
| 50000 | .94  | .45 | .5500 | 10125 | 24750 | 15125 | .4432 | .5568 | 9704  | 24378 | 15311 | 9518  | 24750 | 15125 | 608   | 11.51  |
| 50000 | .95  | .45 | .5500 | 10125 | 24750 | 15125 | .4444 | .5556 | 9773  | 24441 | 15280 | 9619  | 24750 | 15125 | 506   | 7.93   |
| 50000 | .96  | .45 | .5500 | 10125 | 24750 | 15125 | .4455 | .5545 | 9844  | 24503 | 15249 | 9720  | 24750 | 15125 | 405   | 5.04   |
| 50000 | .97  | .45 | .5500 | 10125 | 24750 | 15125 | .4466 | .5534 | 9914  | 24565 | 15217 | 9821  | 24750 | 15125 | 304   | 2.82   |
| 50000 | .98  | .45 | .5500 | 10125 | 24750 | 15125 | .4478 | .5522 | 9984  | 24627 | 15187 | 9923  | 24750 | 15125 | 203   | 1.24   |
| 50000 | .99  | .45 | .5500 | 10125 | 24750 | 15125 | .4489 | .5511 | 10054 | 24689 | 15156 | 10024 | 24750 | 15125 | 101   | .31    |
| 50000 | 1.00 | .45 | .5500 | 10125 | 24750 | 15125 | .4500 | .5500 | 10125 | 24750 | 15125 | 10125 | 24750 | 15125 | 0     | .00    |
| 50000 | 1.01 | .45 | .5500 | 10125 | 24750 | 15125 | .4511 | .5489 | 10196 | 24811 | 15094 | 10226 | 24750 | 15125 | -101  | .30    |
| 50000 | 1.02 | .45 | .5500 | 10125 | 24750 | 15125 | .4522 | .5478 | 10266 | 24872 | 15064 | 10328 | 24750 | 15125 | -203  | 1.21   |
| 50000 | 1.03 | .45 | .5500 | 10125 | 24750 | 15125 | .4533 | .5467 | 10337 | 24933 | 15034 | 10429 | 24750 | 15125 | -304  | 2.70   |
| 50000 | 1.04 | .45 | .5500 | 10125 | 24750 | 15125 | .4544 | .5456 | 10408 | 24993 | 15003 | 10530 | 24750 | 15125 | -405  | 4.77   |
| 50000 | 1.05 | .45 | .5500 | 10125 | 24750 | 15125 | .4555 | .5445 | 10480 | 25053 | 14973 | 10631 | 24750 | 15125 | -506  | 7.40   |
| 50000 | 1.06 | .45 | .5500 | 10125 | 24750 | 15125 | .4566 | .5434 | 10551 | 25113 | 14943 | 10733 | 24750 | 15125 | -608  | 10.58  |
| 50000 | 1.07 | .45 | .5500 | 10125 | 24750 | 15125 | .4577 | .5423 | 10622 | 25173 | 14914 | 10834 | 24750 | 15125 | -709  | 14.31  |
| 50000 | 1.08 | .45 | .5500 | 10125 | 24750 | 15125 | .4588 | .5412 | 10694 | 25232 | 14884 | 10935 | 24750 | 15125 | -810  | 18.56  |
| 50000 | 1.09 | .45 | .5500 | 10125 | 24750 | 15125 | .4598 | .5402 | 10766 | 25291 | 14854 | 11036 | 24750 | 15125 | -911  | 23.33  |
| 50000 | 1.10 | .45 | .5500 | 10125 | 24750 | 15125 | .4609 | .5391 | 10837 | 25350 | 14825 | 11138 | 24750 | 15125 | -1013 | 28.62  |
| 50000 | 1.11 | .45 | .5500 | 10125 | 24750 | 15125 | .4620 | .5380 | 10909 | 25409 | 14795 | 11239 | 24750 | 15125 | -1114 | 34.40  |
| 50000 | 1.12 | .45 | .5500 | 10125 | 24750 | 15125 | .4630 | .5370 | 10981 | 25468 | 14766 | 11340 | 24750 | 15125 | -1215 | 40.67  |
| 50000 | 1.13 | .45 | .5500 | 10125 | 24750 | 15125 | .4641 | .5359 | 11053 | 25526 | 14737 | 11441 | 24750 | 15125 | -1316 | 47.41  |
| 50000 | 1.14 | .45 | .5500 | 10125 | 24750 | 15125 | .4652 | .5348 | 11126 | 25584 | 14708 | 11543 | 24750 | 15125 | -1418 | 54.63  |
| 50000 | 1.15 | .45 | .5500 | 10125 | 24750 | 15125 | .4662 | .5338 | 11198 | 25642 | 14679 | 11644 | 24750 | 15125 | -1519 | 62.31  |
| 50000 | 1.16 | .45 | .5500 | 10125 | 24750 | 15125 | .4673 | .5327 | 11270 | 25699 | 14650 | 11745 | 24750 | 15125 | -1620 | 70.44  |
| 50000 | 1.17 | .45 | .5500 | 10125 | 24750 | 15125 | .4683 | .5317 | 11343 | 25757 | 14622 | 11846 | 24750 | 15125 | -1721 | 79.01  |
| 50000 | 1.18 | .45 | .5500 | 10125 | 24750 | 15125 | .4693 | .5307 | 11416 | 25814 | 14593 | 11948 | 24750 | 15125 | -1823 | 88.02  |
| 50000 | 1.19 | .45 | .5500 | 10125 | 24750 | 15125 | .4704 | .5296 | 11488 | 25871 | 14565 | 12049 | 24750 | 15125 | -1924 | 97.45  |
| 50000 | 1.20 | .45 | .5500 | 10125 | 24750 | 15125 | .4714 | .5286 | 11561 | 25927 | 14536 | 12150 | 24750 | 15125 | -2025 | 107.29 |
| 50000 | .80  | .50 | .5000 | 12500 | 25000 | 12500 | .4737 | .5263 | 10658 | 23684 | 13158 | 10000 | 25000 | 12500 | 2500  | 146.60 |
| 50000 | .81  | .50 | .5000 | 12500 | 25000 | 12500 | .4751 | .5249 | 10748 | 23753 | 13123 | 10125 | 25000 | 12500 | 2375  | 131.20 |
| 50000 | .82  | .50 | .5000 | 12500 | 25000 | 12500 | .4764 | .5236 | 10839 | 23822 | 13089 | 10250 | 25000 | 12500 | 2250  | 116.7  |

|       |      |     |       |       |       |       |       |       |       |       |       |       |       |       |       |        |
|-------|------|-----|-------|-------|-------|-------|-------|-------|-------|-------|-------|-------|-------|-------|-------|--------|
|       |      |     |       |       |       |       |       |       |       |       |       |       |       |       |       | 7      |
| 50000 | .83  | .50 | .5000 | 12500 | 25000 | 12500 | .4778 | .5222 | 10930 | 23890 | 13055 | 10375 | 25000 | 12500 | 2125  | 103.29 |
| 50000 | .84  | .50 | .5000 | 12500 | 25000 | 12500 | .4792 | .5208 | 11021 | 23958 | 13021 | 10500 | 25000 | 12500 | 2000  | 90.74  |
| 50000 | .85  | .50 | .5000 | 12500 | 25000 | 12500 | .4805 | .5195 | 11112 | 24026 | 12987 | 10625 | 25000 | 12500 | 1875  | 79.10  |
| 50000 | .86  | .50 | .5000 | 12500 | 25000 | 12500 | .4819 | .5181 | 11203 | 24093 | 12953 | 10750 | 25000 | 12500 | 1750  | 68.34  |
| 50000 | .87  | .50 | .5000 | 12500 | 25000 | 12500 | .4832 | .5168 | 11295 | 24160 | 12920 | 10875 | 25000 | 12500 | 1625  | 58.45  |
| 50000 | .88  | .50 | .5000 | 12500 | 25000 | 12500 | .4845 | .5155 | 11387 | 24227 | 12887 | 11000 | 25000 | 12500 | 1500  | 49.40  |
| 50000 | .89  | .50 | .5000 | 12500 | 25000 | 12500 | .4859 | .5141 | 11478 | 24293 | 12853 | 11125 | 25000 | 12500 | 1375  | 41.18  |
| 50000 | .90  | .50 | .5000 | 12500 | 25000 | 12500 | .4872 | .5128 | 11571 | 24359 | 12821 | 11250 | 25000 | 12500 | 1250  | 33.76  |
| 50000 | .91  | .50 | .5000 | 12500 | 25000 | 12500 | .4885 | .5115 | 11663 | 24425 | 12788 | 11375 | 25000 | 12500 | 1125  | 27.13  |
| 50000 | .92  | .50 | .5000 | 12500 | 25000 | 12500 | .4898 | .5102 | 11755 | 24490 | 12755 | 11500 | 25000 | 12500 | 1000  | 21.27  |
| 50000 | .93  | .50 | .5000 | 12500 | 25000 | 12500 | .4911 | .5089 | 11848 | 24555 | 12723 | 11625 | 25000 | 12500 | 875   | 16.16  |
| 50000 | .94  | .50 | .5000 | 12500 | 25000 | 12500 | .4924 | .5076 | 11940 | 24619 | 12690 | 11750 | 25000 | 12500 | 750   | 11.78  |
| 50000 | .95  | .50 | .5000 | 12500 | 25000 | 12500 | .4937 | .5063 | 12033 | 24684 | 12658 | 11875 | 25000 | 12500 | 625   | 8.12   |
| 50000 | .96  | .50 | .5000 | 12500 | 25000 | 12500 | .4949 | .5051 | 12126 | 24747 | 12626 | 12000 | 25000 | 12500 | 500   | 5.15   |
| 50000 | .97  | .50 | .5000 | 12500 | 25000 | 12500 | .4962 | .5038 | 12219 | 24811 | 12594 | 12125 | 25000 | 12500 | 375   | 2.88   |
| 50000 | .98  | .50 | .5000 | 12500 | 25000 | 12500 | .4975 | .5025 | 12313 | 24874 | 12563 | 12250 | 25000 | 12500 | 250   | 1.27   |
| 50000 | .99  | .50 | .5000 | 12500 | 25000 | 12500 | .4987 | .5013 | 12406 | 24937 | 12531 | 12375 | 25000 | 12500 | 125   | .31    |
| 50000 | 1.00 | .50 | .5000 | 12500 | 25000 | 12500 | .5000 | .5000 | 12500 | 25000 | 12500 | 12500 | 25000 | 12500 | 0     | .00    |
| 50000 | 1.01 | .50 | .5000 | 12500 | 25000 | 12500 | .5012 | .4988 | 12594 | 25062 | 12469 | 12625 | 25000 | 12500 | -125  | .31    |
| 50000 | 1.02 | .50 | .5000 | 12500 | 25000 | 12500 | .5025 | .4975 | 12688 | 25124 | 12438 | 12750 | 25000 | 12500 | -250  | 1.23   |
| 50000 | 1.03 | .50 | .5000 | 12500 | 25000 | 12500 | .5037 | .4963 | 12782 | 25186 | 12407 | 12875 | 25000 | 12500 | -375  | 2.75   |
| 50000 | 1.04 | .50 | .5000 | 12500 | 25000 | 12500 | .5050 | .4950 | 12876 | 25248 | 12376 | 13000 | 25000 | 12500 | -500  | 4.85   |
| 50000 | 1.05 | .50 | .5000 | 12500 | 25000 | 12500 | .5062 | .4938 | 12971 | 25309 | 12346 | 13125 | 25000 | 12500 | -625  | 7.53   |
| 50000 | 1.06 | .50 | .5000 | 12500 | 25000 | 12500 | .5074 | .4926 | 13065 | 25369 | 12315 | 13250 | 25000 | 12500 | -750  | 10.76  |
| 50000 | 1.07 | .50 | .5000 | 12500 | 25000 | 12500 | .5086 | .4914 | 13160 | 25430 | 12285 | 13375 | 25000 | 12500 | -875  | 14.54  |
| 50000 | 1.08 | .50 | .5000 | 12500 | 25000 | 12500 | .5098 | .4902 | 13255 | 25490 | 12255 | 13500 | 25000 | 12500 | -1000 | 18.86  |
| 50000 | 1.09 | .50 | .5000 | 12500 | 25000 | 12500 | .5110 | .4890 | 13350 | 25550 | 12225 | 13625 | 25000 | 12500 | -1125 | 23.70  |
| 50000 | 1.10 | .50 | .5000 | 12500 | 25000 | 12500 | .5122 | .4878 | 13445 | 25610 | 12195 | 13750 | 25000 | 12500 | -1250 | 29.05  |
| 50000 | 1.11 | .50 | .5000 | 12500 | 25000 | 12500 | .5134 | .4866 | 13540 | 25669 | 12165 | 13875 | 25000 | 12500 | -1375 | 34.91  |
| 50000 | 1.12 | .50 | .5000 | 12500 | 25000 | 12500 | .5146 | .4854 | 13636 | 25728 | 12136 | 14000 | 25000 | 12500 | -1500 | 41.25  |
| 50000 | 1.13 | .50 | .5000 | 12500 | 25000 | 12500 | .5157 | .4843 | 13732 | 25787 | 12107 | 14125 | 25000 | 12500 | -1625 | 48.08  |

|       |      |     |       |       |       |       |       |       |       |       |       |       |       |       |       |        |
|-------|------|-----|-------|-------|-------|-------|-------|-------|-------|-------|-------|-------|-------|-------|-------|--------|
| 50000 | 1.14 | .50 | .5000 | 12500 | 25000 | 12500 | .5169 | .4831 | 13827 | 25845 | 12077 | 14250 | 25000 | 12500 | -1750 | 55.37  |
| 50000 | 1.15 | .50 | .5000 | 12500 | 25000 | 12500 | .5181 | .4819 | 13923 | 25904 | 12048 | 14375 | 25000 | 12500 | -1875 | 63.13  |
| 50000 | 1.16 | .50 | .5000 | 12500 | 25000 | 12500 | .5192 | .4808 | 14019 | 25962 | 12019 | 14500 | 25000 | 12500 | -2000 | 71.33  |
| 50000 | 1.17 | .50 | .5000 | 12500 | 25000 | 12500 | .5204 | .4796 | 14115 | 26019 | 11990 | 14625 | 25000 | 12500 | -2125 | 79.98  |
| 50000 | 1.18 | .50 | .5000 | 12500 | 25000 | 12500 | .5215 | .4785 | 14212 | 26077 | 11962 | 14750 | 25000 | 12500 | -2250 | 89.06  |
| 50000 | 1.19 | .50 | .5000 | 12500 | 25000 | 12500 | .5227 | .4773 | 14308 | 26134 | 11933 | 14875 | 25000 | 12500 | -2375 | 98.56  |
| 50000 | 1.20 | .50 | .5000 | 12500 | 25000 | 12500 | .5238 | .4762 | 14405 | 26190 | 11905 | 15000 | 25000 | 12500 | -2500 | 108.47 |
| 50000 | .80  | .55 | .4500 | 15125 | 24750 | 10125 | .5210 | .4790 | 12752 | 23446 | 10777 | 12100 | 24750 | 10125 | 3025  | 145.31 |
| 50000 | .81  | .55 | .4500 | 15125 | 24750 | 10125 | .5226 | .4774 | 12869 | 23515 | 10742 | 12251 | 24750 | 10125 | 2874  | 129.95 |
| 50000 | .82  | .55 | .4500 | 15125 | 24750 | 10125 | .5241 | .4759 | 12986 | 23584 | 10708 | 12403 | 24750 | 10125 | 2723  | 115.58 |
| 50000 | .83  | .55 | .4500 | 15125 | 24750 | 10125 | .5256 | .4744 | 13103 | 23652 | 10674 | 12554 | 24750 | 10125 | 2571  | 102.18 |
| 50000 | .84  | .55 | .4500 | 15125 | 24750 | 10125 | .5271 | .4729 | 13220 | 23720 | 10640 | 12705 | 24750 | 10125 | 2420  | 89.71  |
| 50000 | .85  | .55 | .4500 | 15125 | 24750 | 10125 | .5286 | .4714 | 13338 | 23787 | 10606 | 12856 | 24750 | 10125 | 2269  | 78.15  |
| 50000 | .86  | .55 | .4500 | 15125 | 24750 | 10125 | .5301 | .4699 | 13455 | 23854 | 10573 | 13008 | 24750 | 10125 | 2118  | 67.48  |
| 50000 | .87  | .55 | .4500 | 15125 | 24750 | 10125 | .5316 | .4684 | 13573 | 23921 | 10539 | 13159 | 24750 | 10125 | 1966  | 57.68  |
| 50000 | .88  | .55 | .4500 | 15125 | 24750 | 10125 | .5330 | .4670 | 13691 | 23987 | 10506 | 13310 | 24750 | 10125 | 1815  | 48.72  |
| 50000 | .89  | .55 | .4500 | 15125 | 24750 | 10125 | .5345 | .4655 | 13810 | 24053 | 10474 | 13461 | 24750 | 10125 | 1664  | 40.59  |
| 50000 | .90  | .55 | .4500 | 15125 | 24750 | 10125 | .5360 | .4640 | 13928 | 24118 | 10441 | 13613 | 24750 | 10125 | 1513  | 33.26  |
| 50000 | .91  | .55 | .4500 | 15125 | 24750 | 10125 | .5374 | .4626 | 14047 | 24183 | 10408 | 13764 | 24750 | 10125 | 1361  | 26.71  |
| 50000 | .92  | .55 | .4500 | 15125 | 24750 | 10125 | .5388 | .4612 | 14166 | 24248 | 10376 | 13915 | 24750 | 10125 | 1210  | 20.93  |
| 50000 | .93  | .55 | .4500 | 15125 | 24750 | 10125 | .5403 | .4597 | 14285 | 24312 | 10344 | 14066 | 24750 | 10125 | 1059  | 15.89  |
| 50000 | .94  | .55 | .4500 | 15125 | 24750 | 10125 | .5417 | .4583 | 14405 | 24376 | 10312 | 14218 | 24750 | 10125 | 908   | 11.58  |
| 50000 | .95  | .55 | .4500 | 15125 | 24750 | 10125 | .5431 | .4569 | 14524 | 24439 | 10280 | 14369 | 24750 | 10125 | 756   | 7.97   |
| 50000 | .96  | .55 | .4500 | 15125 | 24750 | 10125 | .5445 | .4555 | 14644 | 24502 | 10249 | 14520 | 24750 | 10125 | 605   | 5.06   |
| 50000 | .97  | .55 | .4500 | 15125 | 24750 | 10125 | .5459 | .4541 | 14764 | 24565 | 10218 | 14671 | 24750 | 10125 | 454   | 2.82   |
| 50000 | .98  | .55 | .4500 | 15125 | 24750 | 10125 | .5473 | .4527 | 14884 | 24627 | 10187 | 14823 | 24750 | 10125 | 303   | 1.24   |
| 50000 | .99  | .55 | .4500 | 15125 | 24750 | 10125 | .5486 | .4514 | 15004 | 24689 | 10156 | 14974 | 24750 | 10125 | 151   | .31    |
| 50000 | 1.00 | .55 | .4500 | 15125 | 24750 | 10125 | .5500 | .4500 | 15125 | 24750 | 10125 | 15125 | 24750 | 10125 | 0     | .00    |

|       |      |     |       |       |       |       |       |       |       |       |       |       |       |       |       |        |
|-------|------|-----|-------|-------|-------|-------|-------|-------|-------|-------|-------|-------|-------|-------|-------|--------|
| 50000 | 1.01 | .55 | .4500 | 15125 | 24750 | 10125 | .5514 | .4486 | 15246 | 24811 | 10094 | 15276 | 24750 | 10125 | -151  | .30    |
| 50000 | 1.02 | .55 | .4500 | 15125 | 24750 | 10125 | .5527 | .4473 | 15367 | 24872 | 10064 | 15428 | 24750 | 10125 | -303  | 1.21   |
| 50000 | 1.03 | .55 | .4500 | 15125 | 24750 | 10125 | .5540 | .4460 | 15488 | 24932 | 10034 | 15579 | 24750 | 10125 | -454  | 2.69   |
| 50000 | 1.04 | .55 | .4500 | 15125 | 24750 | 10125 | .5554 | .4446 | 15609 | 24992 | 10004 | 15730 | 24750 | 10125 | -605  | 4.75   |
| 50000 | 1.05 | .55 | .4500 | 15125 | 24750 | 10125 | .5567 | .4433 | 15730 | 25052 | 9974  | 15881 | 24750 | 10125 | -756  | 7.36   |
| 50000 | 1.06 | .55 | .4500 | 15125 | 24750 | 10125 | .5580 | .4420 | 15852 | 25111 | 9945  | 16033 | 24750 | 10125 | -908  | 10.52  |
| 50000 | 1.07 | .55 | .4500 | 15125 | 24750 | 10125 | .5593 | .4407 | 15974 | 25170 | 9915  | 16184 | 24750 | 10125 | -1059 | 14.21  |
| 50000 | 1.08 | .55 | .4500 | 15125 | 24750 | 10125 | .5606 | .4394 | 16096 | 25228 | 9886  | 16335 | 24750 | 10125 | -1210 | 18.42  |
| 50000 | 1.09 | .55 | .4500 | 15125 | 24750 | 10125 | .5619 | .4381 | 16218 | 25287 | 9857  | 16486 | 24750 | 10125 | -1361 | 23.14  |
| 50000 | 1.10 | .55 | .4500 | 15125 | 24750 | 10125 | .5632 | .4368 | 16340 | 25345 | 9828  | 16638 | 24750 | 10125 | -1513 | 28.35  |
| 50000 | 1.11 | .55 | .4500 | 15125 | 24750 | 10125 | .5645 | .4355 | 16463 | 25402 | 9799  | 16789 | 24750 | 10125 | -1664 | 34.05  |
| 50000 | 1.12 | .55 | .4500 | 15125 | 24750 | 10125 | .5658 | .4342 | 16585 | 25459 | 9770  | 16940 | 24750 | 10125 | -1815 | 40.22  |
| 50000 | 1.13 | .55 | .4500 | 15125 | 24750 | 10125 | .5670 | .4330 | 16708 | 25516 | 9742  | 17091 | 24750 | 10125 | -1966 | 46.86  |
| 50000 | 1.14 | .55 | .4500 | 15125 | 24750 | 10125 | .5683 | .4317 | 16831 | 25573 | 9714  | 17243 | 24750 | 10125 | -2118 | 53.95  |
| 50000 | 1.15 | .55 | .4500 | 15125 | 24750 | 10125 | .5695 | .4305 | 16954 | 25629 | 9686  | 17394 | 24750 | 10125 | -2269 | 61.48  |
| 50000 | 1.16 | .55 | .4500 | 15125 | 24750 | 10125 | .5708 | .4292 | 17078 | 25685 | 9658  | 17545 | 24750 | 10125 | -2420 | 69.44  |
| 50000 | 1.17 | .55 | .4500 | 15125 | 24750 | 10125 | .5720 | .4280 | 17201 | 25740 | 9630  | 17696 | 24750 | 10125 | -2571 | 77.83  |
| 50000 | 1.18 | .55 | .4500 | 15125 | 24750 | 10125 | .5732 | .4268 | 17325 | 25796 | 9602  | 17848 | 24750 | 10125 | -2723 | 86.64  |
| 50000 | 1.19 | .55 | .4500 | 15125 | 24750 | 10125 | .5745 | .4255 | 17448 | 25851 | 9575  | 17999 | 24750 | 10125 | -2874 | 95.84  |
| 50000 | 1.20 | .55 | .4500 | 15125 | 24750 | 10125 | .5757 | .4243 | 17572 | 25905 | 9547  | 18150 | 24750 | 10125 | -3025 | 105.45 |
| 50000 | .80  | .60 | .4000 | 18000 | 24000 | 8000  | .5690 | .4310 | 15021 | 22759 | 8621  | 14400 | 24000 | 8000  | 3600  | 138.05 |
| 50000 | .81  | .60 | .4000 | 18000 | 24000 | 8000  | .5706 | .4294 | 15167 | 22825 | 8587  | 14580 | 24000 | 8000  | 3420  | 123.38 |
| 50000 | .82  | .60 | .4000 | 18000 | 24000 | 8000  | .5723 | .4277 | 15314 | 22891 | 8554  | 14760 | 24000 | 8000  | 3240  | 109.68 |
| 50000 | .83  | .60 | .4000 | 18000 | 24000 | 8000  | .5739 | .4261 | 15462 | 22957 | 8522  | 14940 | 24000 | 8000  | 3060  | 96.90  |
| 50000 | .84  | .60 | .4000 | 18000 | 24000 | 8000  | .5756 | .4244 | 15609 | 23022 | 8489  | 15120 | 24000 | 8000  | 2880  | 85.02  |
| 50000 | .85  | .60 | .4000 | 18000 | 24000 | 8000  | .5772 | .4228 | 15757 | 23087 | 8457  | 15300 | 24000 | 8000  | 2700  | 74.03  |
| 50000 | .86  | .60 | .4000 | 18000 | 24000 | 8000  | .5788 | .4212 | 15905 | 23151 | 8425  | 15480 | 24000 | 8000  | 2520  | 63.88  |
| 50000 | .87  | .60 | .4000 | 18000 | 24000 | 8000  | .5804 | .4196 | 16053 | 23214 | 8393  | 15660 | 24000 | 8000  | 2340  | 54.58  |
| 50000 | .88  | .60 | .4000 | 18000 | 24000 | 8000  | .5819 | .4181 | 16201 | 23278 | 8361  | 15840 | 24000 | 8000  | 2160  | 46.08  |

|       |      |     |       |       |       |      |       |       |       |       |      |       |       |      |       |       |
|-------|------|-----|-------|-------|-------|------|-------|-------|-------|-------|------|-------|-------|------|-------|-------|
| 50000 | .89  | .60 | .4000 | 18000 | 24000 | 8000 | .5835 | .4165 | 16350 | 23340 | 8330 | 16020 | 24000 | 8000 | 1980  | 38.37 |
| 50000 | .90  | .60 | .4000 | 18000 | 24000 | 8000 | .5851 | .4149 | 16499 | 23402 | 8299 | 16200 | 24000 | 8000 | 1800  | 31.42 |
| 50000 | .91  | .60 | .4000 | 18000 | 24000 | 8000 | .5866 | .4134 | 16648 | 23464 | 8268 | 16380 | 24000 | 8000 | 1620  | 25.22 |
| 50000 | .92  | .60 | .4000 | 18000 | 24000 | 8000 | .5881 | .4119 | 16797 | 23526 | 8237 | 16560 | 24000 | 8000 | 1440  | 19.75 |
| 50000 | .93  | .60 | .4000 | 18000 | 24000 | 8000 | .5897 | .4103 | 16947 | 23586 | 8207 | 16740 | 24000 | 8000 | 1260  | 14.99 |
| 50000 | .94  | .60 | .4000 | 18000 | 24000 | 8000 | .5912 | .4088 | 17097 | 23647 | 8177 | 16920 | 24000 | 8000 | 1080  | 10.92 |
| 50000 | .95  | .60 | .4000 | 18000 | 24000 | 8000 | .5927 | .4073 | 17247 | 23707 | 8147 | 17100 | 24000 | 8000 | 900   | 7.51  |
| 50000 | .96  | .60 | .4000 | 18000 | 24000 | 8000 | .5942 | .4058 | 17397 | 23766 | 8117 | 17280 | 24000 | 8000 | 720   | 4.77  |
| 50000 | .97  | .60 | .4000 | 18000 | 24000 | 8000 | .5956 | .4044 | 17547 | 23825 | 8087 | 17460 | 24000 | 8000 | 540   | 2.66  |
| 50000 | .98  | .60 | .4000 | 18000 | 24000 | 8000 | .5971 | .4029 | 17698 | 23884 | 8058 | 17640 | 24000 | 8000 | 360   | 1.17  |
| 50000 | .99  | .60 | .4000 | 18000 | 24000 | 8000 | .5986 | .4014 | 17849 | 23942 | 8029 | 17820 | 24000 | 8000 | 180   | .29   |
| 50000 | 1.00 | .60 | .4000 | 18000 | 24000 | 8000 | .6000 | .4000 | 18000 | 24000 | 8000 | 18000 | 24000 | 8000 | 0     | .00   |
| 50000 | 1.01 | .60 | .4000 | 18000 | 24000 | 8000 | .6014 | .3986 | 18151 | 24057 | 7971 | 18180 | 24000 | 8000 | -180  | .29   |
| 50000 | 1.02 | .60 | .4000 | 18000 | 24000 | 8000 | .6029 | .3971 | 18303 | 24114 | 7943 | 18360 | 24000 | 8000 | -360  | 1.13  |
| 50000 | 1.03 | .60 | .4000 | 18000 | 24000 | 8000 | .6043 | .3957 | 18455 | 24171 | 7915 | 18540 | 24000 | 8000 | -540  | 2.53  |
| 50000 | 1.04 | .60 | .4000 | 18000 | 24000 | 8000 | .6057 | .3943 | 18606 | 24227 | 7886 | 18720 | 24000 | 8000 | -720  | 4.46  |
| 50000 | 1.05 | .60 | .4000 | 18000 | 24000 | 8000 | .6071 | .3929 | 18759 | 24283 | 7859 | 18900 | 24000 | 8000 | -900  | 6.91  |
| 50000 | 1.06 | .60 | .4000 | 18000 | 24000 | 8000 | .6085 | .3915 | 18911 | 24338 | 7831 | 19080 | 24000 | 8000 | -1080 | 9.87  |
| 50000 | 1.07 | .60 | .4000 | 18000 | 24000 | 8000 | .6098 | .3902 | 19063 | 24393 | 7803 | 19260 | 24000 | 8000 | -1260 | 13.32 |
| 50000 | 1.08 | .60 | .4000 | 18000 | 24000 | 8000 | .6112 | .3888 | 19216 | 24448 | 7776 | 19440 | 24000 | 8000 | -1440 | 17.27 |
| 50000 | 1.09 | .60 | .4000 | 18000 | 24000 | 8000 | .6126 | .3874 | 19369 | 24502 | 7749 | 19620 | 24000 | 8000 | -1620 | 21.68 |
| 50000 | 1.10 | .60 | .4000 | 18000 | 24000 | 8000 | .6139 | .3861 | 19522 | 24556 | 7722 | 19800 | 24000 | 8000 | -1800 | 26.55 |
| 50000 | 1.11 | .60 | .4000 | 18000 | 24000 | 8000 | .6152 | .3848 | 19675 | 24609 | 7695 | 19980 | 24000 | 8000 | -1980 | 31.88 |
| 50000 | 1.12 | .60 | .4000 | 18000 | 24000 | 8000 | .6166 | .3834 | 19829 | 24663 | 7669 | 20160 | 24000 | 8000 | -2160 | 37.65 |
| 50000 | 1.13 | .60 | .4000 | 18000 | 24000 | 8000 | .6179 | .3821 | 19982 | 24715 | 7642 | 20340 | 24000 | 8000 | -2340 | 43.84 |
| 50000 | 1.14 | .60 | .4000 | 18000 | 24000 | 8000 | .6192 | .3808 | 20136 | 24768 | 7616 | 20520 | 24000 | 8000 | -2520 | 50.46 |
| 50000 | 1.15 | .60 | .4000 | 18000 | 24000 | 8000 | .6205 | .3795 | 20290 | 24820 | 7590 | 20700 | 24000 | 8000 | -2700 | 57.49 |
| 50000 | 1.16 | .60 | .4000 | 18000 | 24000 | 8000 | .6218 | .3782 | 20444 | 24871 | 7564 | 20880 | 24000 | 8000 | -2880 | 64.91 |
| 50000 | 1.17 | .60 | .4000 | 18000 | 24000 | 8000 | .6231 | .3769 | 20599 | 24923 | 7539 | 21060 | 24000 | 8000 | -3060 | 72.73 |
| 50000 | 1.18 | .60 | .4000 | 18000 | 24000 | 8000 | .6243 | .3757 | 20753 | 24974 | 7513 | 21240 | 24000 | 8000 | -3240 | 80.93 |
| 50000 | 1.19 | .60 | .4000 | 18000 | 24000 | 8000 | .6256 | .3744 | 20908 | 25024 | 7488 | 21420 | 24000 | 8000 | -3420 | 89.51 |
| 50000 | 1.20 | .60 | .4000 | 18000 | 24000 | 8000 | .6269 | .3731 | 21063 | 25075 | 7463 | 21600 | 24000 | 8000 | -3600 | 98.45 |
| 50000 | .80  | .65 | .3500 | 21125 | 22750 | 6125 | .6177 | .3823 | 17465 | 21619 | 6690 | 16900 | 22750 | 6125 | 4225  | 125.2 |

|       |      |     |       |       |       |      |       |       |       |       |      |       |       |      |       |        |
|-------|------|-----|-------|-------|-------|------|-------|-------|-------|-------|------|-------|-------|------|-------|--------|
|       |      |     |       |       |       |      |       |       |       |       |      |       |       |      | 0     |        |
| 50000 | .81  | .65 | .3500 | 21125 | 22750 | 6125 | .6195 | .3805 | 17646 | 21681 | 6660 | 17111 | 22750 | 6125 | 4014  | 111.84 |
| 50000 | .82  | .65 | .3500 | 21125 | 22750 | 6125 | .6212 | .3788 | 17827 | 21742 | 6629 | 17323 | 22750 | 6125 | 3803  | 99.36  |
| 50000 | .83  | .65 | .3500 | 21125 | 22750 | 6125 | .6229 | .3771 | 18008 | 21802 | 6599 | 17534 | 22750 | 6125 | 3591  | 87.73  |
| 50000 | .84  | .65 | .3500 | 21125 | 22750 | 6125 | .6246 | .3754 | 18189 | 21862 | 6569 | 17745 | 22750 | 6125 | 3380  | 76.94  |
| 50000 | .85  | .65 | .3500 | 21125 | 22750 | 6125 | .6263 | .3737 | 18371 | 21921 | 6539 | 17956 | 22750 | 6125 | 3169  | 66.96  |
| 50000 | .86  | .65 | .3500 | 21125 | 22750 | 6125 | .6280 | .3720 | 18553 | 21980 | 6510 | 18168 | 22750 | 6125 | 2958  | 57.75  |
| 50000 | .87  | .65 | .3500 | 21125 | 22750 | 6125 | .6297 | .3703 | 18735 | 22038 | 6481 | 18379 | 22750 | 6125 | 2746  | 49.31  |
| 50000 | .88  | .65 | .3500 | 21125 | 22750 | 6125 | .6313 | .3687 | 18917 | 22096 | 6452 | 18590 | 22750 | 6125 | 2535  | 41.61  |
| 50000 | .89  | .65 | .3500 | 21125 | 22750 | 6125 | .6329 | .3671 | 19100 | 22153 | 6424 | 18801 | 22750 | 6125 | 2324  | 34.63  |
| 50000 | .90  | .65 | .3500 | 21125 | 22750 | 6125 | .6346 | .3654 | 19283 | 22210 | 6395 | 19013 | 22750 | 6125 | 2113  | 28.35  |
| 50000 | .91  | .65 | .3500 | 21125 | 22750 | 6125 | .6362 | .3638 | 19466 | 22266 | 6367 | 19224 | 22750 | 6125 | 1901  | 22.75  |
| 50000 | .92  | .65 | .3500 | 21125 | 22750 | 6125 | .6378 | .3622 | 19649 | 22321 | 6339 | 19435 | 22750 | 6125 | 1690  | 17.81  |
| 50000 | .93  | .65 | .3500 | 21125 | 22750 | 6125 | .6393 | .3607 | 19833 | 22377 | 6312 | 19646 | 22750 | 6125 | 1479  | 13.51  |
| 50000 | .94  | .65 | .3500 | 21125 | 22750 | 6125 | .6409 | .3591 | 20017 | 22431 | 6284 | 19858 | 22750 | 6125 | 1268  | 9.83   |
| 50000 | .95  | .65 | .3500 | 21125 | 22750 | 6125 | .6424 | .3576 | 20201 | 22486 | 6257 | 20069 | 22750 | 6125 | 1056  | 6.77   |
| 50000 | .96  | .65 | .3500 | 21125 | 22750 | 6125 | .6440 | .3560 | 20385 | 22539 | 6230 | 20280 | 22750 | 6125 | 845   | 4.29   |
| 50000 | .97  | .65 | .3500 | 21125 | 22750 | 6125 | .6455 | .3545 | 20570 | 22593 | 6204 | 20491 | 22750 | 6125 | 634   | 2.39   |
| 50000 | .98  | .65 | .3500 | 21125 | 22750 | 6125 | .6470 | .3530 | 20755 | 22646 | 6177 | 20703 | 22750 | 6125 | 423   | 1.05   |
| 50000 | .99  | .65 | .3500 | 21125 | 22750 | 6125 | .6485 | .3515 | 20940 | 22698 | 6151 | 20914 | 22750 | 6125 | 211   | .26    |
| 50000 | 1.00 | .65 | .3500 | 21125 | 22750 | 6125 | .6500 | .3500 | 21125 | 22750 | 6125 | 21125 | 22750 | 6125 | 0     | .00    |
| 50000 | 1.01 | .65 | .3500 | 21125 | 22750 | 6125 | .6515 | .3485 | 21310 | 22802 | 6099 | 21336 | 22750 | 6125 | -211  | .26    |
| 50000 | 1.02 | .65 | .3500 | 21125 | 22750 | 6125 | .6529 | .3471 | 21496 | 22853 | 6074 | 21548 | 22750 | 6125 | -423  | 1.02   |
| 50000 | 1.03 | .65 | .3500 | 21125 | 22750 | 6125 | .6544 | .3456 | 21682 | 22903 | 6048 | 21759 | 22750 | 6125 | -634  | 2.27   |
| 50000 | 1.04 | .65 | .3500 | 21125 | 22750 | 6125 | .6558 | .3442 | 21868 | 22954 | 6023 | 21970 | 22750 | 6125 | -845  | 4.00   |
| 50000 | 1.05 | .65 | .3500 | 21125 | 22750 | 6125 | .6572 | .3428 | 22055 | 23003 | 5998 | 22181 | 22750 | 6125 | -1056 | 6.20   |
| 50000 | 1.06 | .65 | .3500 | 21125 | 22750 | 6125 | .6587 | .3413 | 22241 | 23053 | 5974 | 22393 | 22750 | 6125 | -1268 | 8.85   |
| 50000 | 1.07 | .65 | .3500 | 21125 | 22750 | 6125 | .6601 | .3399 | 22428 | 23102 | 5949 | 22604 | 22750 | 6125 | -1479 | 11.94  |
| 50000 | 1.08 | .65 | .3500 | 21125 | 22750 | 6125 | .6614 | .3386 | 22615 | 23151 | 5925 | 22815 | 22750 | 6125 | -1690 | 15.47  |
| 50000 | 1.09 | .65 | .3500 | 21125 | 22750 | 6125 | .6628 | .3372 | 22802 | 23199 | 5901 | 23026 | 22750 | 6125 | -1901 | 19.42  |
| 50000 | 1.10 | .65 | .3500 | 21125 | 22750 | 6125 | .6642 | .3358 | 22989 | 23247 | 5877 | 23238 | 22750 | 6125 | -2113 | 23.78  |
| 50000 | 1.11 | .65 | .3500 | 21125 | 22750 | 6125 | .6655 | .3345 | 23177 | 23294 | 5853 | 23449 | 22750 | 6125 | -2324 | 28.54  |

|       |      |     |       |       |       |      |       |       |       |       |      |       |       |      |       |        |
|-------|------|-----|-------|-------|-------|------|-------|-------|-------|-------|------|-------|-------|------|-------|--------|
| 50000 | 1.12 | .65 | .3500 | 21125 | 22750 | 6125 | .6669 | .3331 | 23364 | 23341 | 5829 | 23660 | 22750 | 6125 | -2535 | 33.69  |
| 50000 | 1.13 | .65 | .3500 | 21125 | 22750 | 6125 | .6682 | .3318 | 23552 | 23388 | 5806 | 23871 | 22750 | 6125 | -2746 | 39.23  |
| 50000 | 1.14 | .65 | .3500 | 21125 | 22750 | 6125 | .6695 | .3305 | 23740 | 23434 | 5783 | 24083 | 22750 | 6125 | -2958 | 45.13  |
| 50000 | 1.15 | .65 | .3500 | 21125 | 22750 | 6125 | .6709 | .3291 | 23929 | 23480 | 5760 | 24294 | 22750 | 6125 | -3169 | 51.40  |
| 50000 | 1.16 | .65 | .3500 | 21125 | 22750 | 6125 | .6722 | .3278 | 24117 | 23526 | 5737 | 24505 | 22750 | 6125 | -3380 | 58.03  |
| 50000 | 1.17 | .65 | .3500 | 21125 | 22750 | 6125 | .6735 | .3265 | 24306 | 23571 | 5715 | 24716 | 22750 | 6125 | -3591 | 65.00  |
| 50000 | 1.18 | .65 | .3500 | 21125 | 22750 | 6125 | .6747 | .3253 | 24495 | 23616 | 5692 | 24928 | 22750 | 6125 | -3803 | 72.31  |
| 50000 | 1.19 | .65 | .3500 | 21125 | 22750 | 6125 | .6760 | .3240 | 24684 | 23660 | 5670 | 25139 | 22750 | 6125 | -4014 | 79.95  |
| 50000 | 1.20 | .65 | .3500 | 21125 | 22750 | 6125 | .6773 | .3227 | 24873 | 23704 | 5648 | 25350 | 22750 | 6125 | -4225 | 87.92  |
| 50000 | .80  | .70 | .3000 | 24500 | 21000 | 4500 | .6674 | .3326 | 20089 | 20022 | 4989 | 19600 | 21000 | 4500 | 4900  | 107.57 |
| 50000 | .81  | .70 | .3000 | 24500 | 21000 | 4500 | .6692 | .3308 | 20307 | 20076 | 4962 | 19845 | 21000 | 4500 | 4655  | 96.04  |
| 50000 | .82  | .70 | .3000 | 24500 | 21000 | 4500 | .6710 | .3290 | 20525 | 20129 | 4935 | 20090 | 21000 | 4500 | 4410  | 85.28  |
| 50000 | .83  | .70 | .3000 | 24500 | 21000 | 4500 | .6727 | .3273 | 20744 | 20182 | 4909 | 20335 | 21000 | 4500 | 4165  | 75.26  |
| 50000 | .84  | .70 | .3000 | 24500 | 21000 | 4500 | .6745 | .3255 | 20963 | 20234 | 4883 | 20580 | 21000 | 4500 | 3920  | 65.97  |
| 50000 | .85  | .70 | .3000 | 24500 | 21000 | 4500 | .6762 | .3238 | 21182 | 20286 | 4857 | 20825 | 21000 | 4500 | 3675  | 57.38  |
| 50000 | .86  | .70 | .3000 | 24500 | 21000 | 4500 | .6779 | .3221 | 21401 | 20337 | 4831 | 21070 | 21000 | 4500 | 3430  | 49.48  |
| 50000 | .87  | .70 | .3000 | 24500 | 21000 | 4500 | .6796 | .3204 | 21621 | 20388 | 4806 | 21315 | 21000 | 4500 | 3185  | 42.23  |
| 50000 | .88  | .70 | .3000 | 24500 | 21000 | 4500 | .6813 | .3187 | 21841 | 20438 | 4781 | 21560 | 21000 | 4500 | 2940  | 35.62  |
| 50000 | .89  | .70 | .3000 | 24500 | 21000 | 4500 | .6829 | .3171 | 22061 | 20487 | 4756 | 21805 | 21000 | 4500 | 2695  | 29.63  |
| 50000 | .90  | .70 | .3000 | 24500 | 21000 | 4500 | .6845 | .3155 | 22282 | 20536 | 4732 | 22050 | 21000 | 4500 | 2450  | 24.25  |
| 50000 | .91  | .70 | .3000 | 24500 | 21000 | 4500 | .6862 | .3138 | 22503 | 20585 | 4708 | 22295 | 21000 | 4500 | 2205  | 19.45  |
| 50000 | .92  | .70 | .3000 | 24500 | 21000 | 4500 | .6878 | .3122 | 22724 | 20633 | 4684 | 22540 | 21000 | 4500 | 1960  | 15.22  |
| 50000 | .93  | .70 | .3000 | 24500 | 21000 | 4500 | .6893 | .3107 | 22945 | 20680 | 4660 | 22785 | 21000 | 4500 | 1715  | 11.54  |
| 50000 | .94  | .70 | .3000 | 24500 | 21000 | 4500 | .6909 | .3091 | 23166 | 20727 | 4636 | 23030 | 21000 | 4500 | 1470  | 8.39   |
| 50000 | .95  | .70 | .3000 | 24500 | 21000 | 4500 | .6925 | .3075 | 23388 | 20774 | 4613 | 23275 | 21000 | 4500 | 1225  | 5.77   |
| 50000 | .96  | .70 | .3000 | 24500 | 21000 | 4500 | .6940 | .3060 | 23610 | 20820 | 4590 | 23520 | 21000 | 4500 | 980   | 3.66   |
| 50000 | .97  | .70 | .3000 | 24500 | 21000 | 4500 | .6955 | .3045 | 23832 | 20866 | 4567 | 23765 | 21000 | 4500 | 735   | 2.04   |
| 50000 | .98  | .70 | .3000 | 24500 | 21000 | 4500 | .6970 | .3030 | 24055 | 20911 | 4545 | 24010 | 21000 | 4500 | 490   | .90    |
| 50000 | .99  | .70 | .3000 | 24500 | 21000 | 4500 | .6985 | .3015 | 24277 | 20956 | 4522 | 24255 | 21000 | 4500 | 245   | .22    |
| 50000 | 1.00 | .70 | .3000 | 24500 | 21000 | 4500 | .7000 | .3000 | 24500 | 21000 | 4500 | 24500 | 21000 | 4500 | 0     | .00    |
| 50000 | 1.01 | .70 | .3000 | 24500 | 21000 | 4500 | .7015 | .2985 | 24723 | 21044 | 4478 | 24745 | 21000 | 4500 | -245  | .22    |
| 50000 | 1.02 | .70 | .3000 | 24500 | 21000 | 4500 | .7029 | .2971 | 24946 | 21087 | 4456 | 24990 | 21000 | 4500 | -490  | .87    |



|       |      |     |       |       |       |      |       |       |       |       |      |       |       |      |       |       |
|-------|------|-----|-------|-------|-------|------|-------|-------|-------|-------|------|-------|-------|------|-------|-------|
| 50000 | 1.03 | .70 | .3000 | 24500 | 21000 | 4500 | .7043 | .2957 | 25170 | 21130 | 4435 | 25235 | 21000 | 4500 | -735  | 1.93  |
| 50000 | 1.04 | .70 | .3000 | 24500 | 21000 | 4500 | .7058 | .2942 | 25393 | 21173 | 4413 | 25480 | 21000 | 4500 | -980  | 3.40  |
| 50000 | 1.05 | .70 | .3000 | 24500 | 21000 | 4500 | .7072 | .2928 | 25617 | 21215 | 4392 | 25725 | 21000 | 4500 | -1225 | 5.27  |
| 50000 | 1.06 | .70 | .3000 | 24500 | 21000 | 4500 | .7086 | .2914 | 25841 | 21257 | 4371 | 25970 | 21000 | 4500 | -1470 | 7.53  |
| 50000 | 1.07 | .70 | .3000 | 24500 | 21000 | 4500 | .7099 | .2901 | 26066 | 21298 | 4351 | 26215 | 21000 | 4500 | -1715 | 10.16 |
| 50000 | 1.08 | .70 | .3000 | 24500 | 21000 | 4500 | .7113 | .2887 | 26290 | 21339 | 4330 | 26460 | 21000 | 4500 | -1960 | 13.15 |
| 50000 | 1.09 | .70 | .3000 | 24500 | 21000 | 4500 | .7127 | .2873 | 26515 | 21380 | 4310 | 26705 | 21000 | 4500 | -2205 | 16.50 |
| 50000 | 1.10 | .70 | .3000 | 24500 | 21000 | 4500 | .7140 | .2860 | 26740 | 21420 | 4290 | 26950 | 21000 | 4500 | -2450 | 20.20 |
| 50000 | 1.11 | .70 | .3000 | 24500 | 21000 | 4500 | .7153 | .2847 | 26965 | 21460 | 4270 | 27195 | 21000 | 4500 | -2695 | 24.24 |
| 50000 | 1.12 | .70 | .3000 | 24500 | 21000 | 4500 | .7167 | .2833 | 27190 | 21500 | 4250 | 27440 | 21000 | 4500 | -2940 | 28.61 |
| 50000 | 1.13 | .70 | .3000 | 24500 | 21000 | 4500 | .7180 | .2820 | 27416 | 21539 | 4231 | 27685 | 21000 | 4500 | -3185 | 33.30 |
| 50000 | 1.14 | .70 | .3000 | 24500 | 21000 | 4500 | .7193 | .2807 | 27641 | 21578 | 4211 | 27930 | 21000 | 4500 | -3430 | 38.31 |
| 50000 | 1.15 | .70 | .3000 | 24500 | 21000 | 4500 | .7205 | .2795 | 27867 | 21616 | 4192 | 28175 | 21000 | 4500 | -3675 | 43.62 |
| 50000 | 1.16 | .70 | .3000 | 24500 | 21000 | 4500 | .7218 | .2782 | 28093 | 21654 | 4173 | 28420 | 21000 | 4500 | -3920 | 49.23 |
| 50000 | 1.17 | .70 | .3000 | 24500 | 21000 | 4500 | .7231 | .2769 | 28319 | 21692 | 4154 | 28665 | 21000 | 4500 | -4165 | 55.13 |
| 50000 | 1.18 | .70 | .3000 | 24500 | 21000 | 4500 | .7243 | .2757 | 28545 | 21729 | 4135 | 28910 | 21000 | 4500 | -4410 | 61.32 |
| 50000 | 1.19 | .70 | .3000 | 24500 | 21000 | 4500 | .7256 | .2744 | 28772 | 21767 | 4117 | 29155 | 21000 | 4500 | -4655 | 67.78 |
| 50000 | 1.20 | .70 | .3000 | 24500 | 21000 | 4500 | .7268 | .2732 | 28998 | 21803 | 4098 | 29400 | 21000 | 4500 | -4900 | 74.52 |
| 50000 | .80  | .75 | .2500 | 28125 | 18750 | 3125 | .7183 | .2817 | 22896 | 17958 | 3521 | 22500 | 18750 | 3125 | 5625  | 86.37 |
| 50000 | .81  | .75 | .2500 | 28125 | 18750 | 3125 | .7201 | .2799 | 23155 | 18002 | 3499 | 22781 | 18750 | 3125 | 5344  | 77.08 |
| 50000 | .82  | .75 | .2500 | 28125 | 18750 | 3125 | .7218 | .2782 | 23415 | 18046 | 3477 | 23063 | 18750 | 3125 | 5063  | 68.41 |
| 50000 | .83  | .75 | .2500 | 28125 | 18750 | 3125 | .7236 | .2764 | 23674 | 18089 | 3455 | 23344 | 18750 | 3125 | 4781  | 60.35 |
| 50000 | .84  | .75 | .2500 | 28125 | 18750 | 3125 | .7253 | .2747 | 23934 | 18132 | 3434 | 23625 | 18750 | 3125 | 4500  | 52.88 |
| 50000 | .85  | .75 | .2500 | 28125 | 18750 | 3125 | .7270 | .2730 | 24194 | 18174 | 3413 | 23906 | 18750 | 3125 | 4219  | 45.98 |
| 50000 | .86  | .75 | .2500 | 28125 | 18750 | 3125 | .7286 | .2714 | 24455 | 18216 | 3392 | 24188 | 18750 | 3125 | 3938  | 39.62 |
| 50000 | .87  | .75 | .2500 | 28125 | 18750 | 3125 | .7303 | .2697 | 24715 | 18257 | 3372 | 24469 | 18750 | 3125 | 3656  | 33.81 |
| 50000 | .88  | .75 | .2500 | 28125 | 18750 | 3125 | .7319 | .2681 | 24976 | 18298 | 3351 | 24750 | 18750 | 3125 | 3375  | 28.50 |
| 50000 | .89  | .75 | .2500 | 28125 | 18750 | 3125 | .7335 | .2665 | 25237 | 18338 | 3331 | 25031 | 18750 | 3125 | 3094  | 23.70 |
| 50000 | .90  | .75 | .2500 | 28125 | 18750 | 3125 | .7351 | .2649 | 25499 | 18377 | 3311 | 25313 | 18750 | 3125 | 2813  | 19.39 |
| 50000 | .91  | .75 | .2500 | 28125 | 18750 | 3125 | .7367 | .2633 | 25760 | 18417 | 3292 | 25594 | 18750 | 3125 | 2531  | 15.55 |
| 50000 | .92  | .75 | .2500 | 28125 | 18750 | 3125 | .7382 | .2618 | 26022 | 18455 | 3272 | 25875 | 18750 | 3125 | 2250  | 12.16 |
| 50000 | .93  | .75 | .2500 | 28125 | 18750 | 3125 | .7398 | .2602 | 26284 | 18494 | 3253 | 26156 | 18750 | 3125 | 1969  | 9.22  |
| 50000 | .94  | .75 | .2500 | 28125 | 18750 | 3125 | .7413 | .2587 | 26547 | 18532 | 3234 | 26438 | 18750 | 3125 | 1688  | 6.70  |

|       |      |     |       |       |       |      |       |       |       |       |      |       |       |      |       |       |
|-------|------|-----|-------|-------|-------|------|-------|-------|-------|-------|------|-------|-------|------|-------|-------|
| 50000 | .95  | .75 | .2500 | 28125 | 18750 | 3125 | .7428 | .2572 | 26809 | 18569 | 3215 | 26719 | 18750 | 3125 | 1406  | 4.61  |
| 50000 | .96  | .75 | .2500 | 28125 | 18750 | 3125 | .7442 | .2558 | 27072 | 18606 | 3197 | 27000 | 18750 | 3125 | 1125  | 2.92  |
| 50000 | .97  | .75 | .2500 | 28125 | 18750 | 3125 | .7457 | .2543 | 27335 | 18643 | 3179 | 27281 | 18750 | 3125 | 844   | 1.63  |
| 50000 | .98  | .75 | .2500 | 28125 | 18750 | 3125 | .7472 | .2528 | 27598 | 18679 | 3161 | 27563 | 18750 | 3125 | 563   | .72   |
| 50000 | .99  | .75 | .2500 | 28125 | 18750 | 3125 | .7486 | .2514 | 27861 | 18715 | 3143 | 27844 | 18750 | 3125 | 281   | .18   |
| 50000 | 1.00 | .75 | .2500 | 28125 | 18750 | 3125 | .7500 | .2500 | 28125 | 18750 | 3125 | 28125 | 18750 | 3125 | 0     | .00   |
| 50000 | 1.01 | .75 | .2500 | 28125 | 18750 | 3125 | .7514 | .2486 | 28389 | 18785 | 3108 | 28406 | 18750 | 3125 | -281  | .17   |
| 50000 | 1.02 | .75 | .2500 | 28125 | 18750 | 3125 | .7528 | .2472 | 28653 | 18820 | 3090 | 28688 | 18750 | 3125 | -563  | .69   |
| 50000 | 1.03 | .75 | .2500 | 28125 | 18750 | 3125 | .7541 | .2459 | 28917 | 18854 | 3073 | 28969 | 18750 | 3125 | -844  | 1.54  |
| 50000 | 1.04 | .75 | .2500 | 28125 | 18750 | 3125 | .7555 | .2445 | 29181 | 18888 | 3056 | 29250 | 18750 | 3125 | -1125 | 2.71  |
| 50000 | 1.05 | .75 | .2500 | 28125 | 18750 | 3125 | .7568 | .2432 | 29446 | 18921 | 3040 | 29531 | 18750 | 3125 | -1406 | 4.20  |
| 50000 | 1.06 | .75 | .2500 | 28125 | 18750 | 3125 | .7582 | .2418 | 29710 | 18954 | 3023 | 29813 | 18750 | 3125 | -1688 | 5.99  |
| 50000 | 1.07 | .75 | .2500 | 28125 | 18750 | 3125 | .7595 | .2405 | 29975 | 18987 | 3007 | 30094 | 18750 | 3125 | -1969 | 8.08  |
| 50000 | 1.08 | .75 | .2500 | 28125 | 18750 | 3125 | .7608 | .2392 | 30240 | 19019 | 2990 | 30375 | 18750 | 3125 | -2250 | 10.46 |
| 50000 | 1.09 | .75 | .2500 | 28125 | 18750 | 3125 | .7620 | .2380 | 30506 | 19051 | 2974 | 30656 | 18750 | 3125 | -2531 | 13.13 |
| 50000 | 1.10 | .75 | .2500 | 28125 | 18750 | 3125 | .7633 | .2367 | 30771 | 19083 | 2959 | 30938 | 18750 | 3125 | -2813 | 16.07 |
| 50000 | 1.11 | .75 | .2500 | 28125 | 18750 | 3125 | .7646 | .2354 | 31037 | 19114 | 2943 | 31219 | 18750 | 3125 | -3094 | 19.27 |
| 50000 | 1.12 | .75 | .2500 | 28125 | 18750 | 3125 | .7658 | .2342 | 31302 | 19145 | 2927 | 31500 | 18750 | 3125 | -3375 | 22.74 |
| 50000 | 1.13 | .75 | .2500 | 28125 | 18750 | 3125 | .7670 | .2330 | 31568 | 19176 | 2912 | 31781 | 18750 | 3125 | -3656 | 26.47 |
| 50000 | 1.14 | .75 | .2500 | 28125 | 18750 | 3125 | .7683 | .2317 | 31834 | 19206 | 2897 | 32063 | 18750 | 3125 | -3938 | 30.44 |
| 50000 | 1.15 | .75 | .2500 | 28125 | 18750 | 3125 | .7695 | .2305 | 32101 | 19236 | 2882 | 32344 | 18750 | 3125 | -4219 | 34.65 |
| 50000 | 1.16 | .75 | .2500 | 28125 | 18750 | 3125 | .7706 | .2294 | 32367 | 19266 | 2867 | 32625 | 18750 | 3125 | -4500 | 39.10 |
| 50000 | 1.17 | .75 | .2500 | 28125 | 18750 | 3125 | .7718 | .2282 | 32634 | 19295 | 2852 | 32906 | 18750 | 3125 | -4781 | 43.78 |
| 50000 | 1.18 | .75 | .2500 | 28125 | 18750 | 3125 | .7730 | .2270 | 32900 | 19325 | 2838 | 33188 | 18750 | 3125 | -5063 | 48.69 |
| 50000 | 1.19 | .75 | .2500 | 28125 | 18750 | 3125 | .7741 | .2259 | 33167 | 19353 | 2823 | 33469 | 18750 | 3125 | -5344 | 53.81 |
| 50000 | 1.20 | .75 | .2500 | 28125 | 18750 | 3125 | .7753 | .2247 | 33434 | 19382 | 2809 | 33750 | 18750 | 3125 | -5625 | 59.15 |
| 50000 | .80  | .80 | .2000 | 32000 | 16000 | 2000 | .7706 | .2294 | 25894 | 15413 | 2294 | 25600 | 16000 | 2000 | 6400  | 63.27 |
| 50000 | .81  | .80 | .2000 | 32000 | 16000 | 2000 | .7723 | .2277 | 26197 | 15446 | 2277 | 25920 | 16000 | 2000 | 6080  | 56.44 |
| 50000 | .82  | .80 | .2000 | 32000 | 16000 | 2000 | .7740 | .2260 | 26500 | 15479 | 2260 | 26240 | 16000 | 2000 | 5760  | 50.08 |
| 50000 | .83  | .80 | .2000 | 32000 | 16000 | 2000 | .7756 | .2244 | 26804 | 15512 | 2244 | 26560 | 16000 | 2000 | 5440  | 44.16 |
| 50000 | .84  | .80 | .2000 | 32000 | 16000 | 2000 | .7772 | .2228 | 27108 | 15544 | 2228 | 26880 | 16000 | 2000 | 5120  | 38.68 |
| 50000 | .85  | .80 | .2000 | 32000 | 16000 | 2000 | .7788 | .2212 | 27412 | 15575 | 2212 | 27200 | 16000 | 2000 | 4800  | 33.62 |
| 50000 | .86  | .80 | .2000 | 32000 | 16000 | 2000 | .7803 | .2197 | 27717 | 15606 | 2197 | 27520 | 16000 | 2000 | 4480  | 28.96 |

|       |      |     |       |       |       |      |       |       |       |       |      |       |       |      |       |       |
|-------|------|-----|-------|-------|-------|------|-------|-------|-------|-------|------|-------|-------|------|-------|-------|
| 50000 | .87  | .80 | .2000 | 32000 | 16000 | 2000 | .7818 | .2182 | 28022 | 15637 | 2182 | 27840 | 16000 | 2000 | 4160  | 24.70 |
| 50000 | .88  | .80 | .2000 | 32000 | 16000 | 2000 | .7834 | .2166 | 28326 | 15667 | 2166 | 28160 | 16000 | 2000 | 3840  | 20.82 |
| 50000 | .89  | .80 | .2000 | 32000 | 16000 | 2000 | .7849 | .2151 | 28631 | 15697 | 2151 | 28480 | 16000 | 2000 | 3520  | 17.31 |
| 50000 | .90  | .80 | .2000 | 32000 | 16000 | 2000 | .7863 | .2137 | 28937 | 15726 | 2137 | 28800 | 16000 | 2000 | 3200  | 14.16 |
| 50000 | .91  | .80 | .2000 | 32000 | 16000 | 2000 | .7878 | .2122 | 29242 | 15756 | 2122 | 29120 | 16000 | 2000 | 2880  | 11.35 |
| 50000 | .92  | .80 | .2000 | 32000 | 16000 | 2000 | .7892 | .2108 | 29548 | 15784 | 2108 | 29440 | 16000 | 2000 | 2560  | 8.87  |
| 50000 | .93  | .80 | .2000 | 32000 | 16000 | 2000 | .7906 | .2094 | 29854 | 15812 | 2094 | 29760 | 16000 | 2000 | 2240  | 6.72  |
| 50000 | .94  | .80 | .2000 | 32000 | 16000 | 2000 | .7920 | .2080 | 30160 | 15840 | 2080 | 30080 | 16000 | 2000 | 1920  | 4.89  |
| 50000 | .95  | .80 | .2000 | 32000 | 16000 | 2000 | .7934 | .2066 | 30466 | 15868 | 2066 | 30400 | 16000 | 2000 | 1600  | 3.36  |
| 50000 | .96  | .80 | .2000 | 32000 | 16000 | 2000 | .7947 | .2053 | 30773 | 15895 | 2053 | 30720 | 16000 | 2000 | 1280  | 2.13  |
| 50000 | .97  | .80 | .2000 | 32000 | 16000 | 2000 | .7961 | .2039 | 31079 | 15922 | 2039 | 31040 | 16000 | 2000 | 960   | 1.19  |
| 50000 | .98  | .80 | .2000 | 32000 | 16000 | 2000 | .7974 | .2026 | 31386 | 15948 | 2026 | 31360 | 16000 | 2000 | 640   | .52   |
| 50000 | .99  | .80 | .2000 | 32000 | 16000 | 2000 | .7987 | .2013 | 31693 | 15974 | 2013 | 31680 | 16000 | 2000 | 320   | .13   |
| 50000 | 1.00 | .80 | .2000 | 32000 | 16000 | 2000 | .8000 | .2000 | 32000 | 16000 | 2000 | 32000 | 16000 | 2000 | 0     | .00   |
| 50000 | 1.01 | .80 | .2000 | 32000 | 16000 | 2000 | .8013 | .1987 | 32307 | 16025 | 1987 | 32320 | 16000 | 2000 | -320  | .13   |
| 50000 | 1.02 | .80 | .2000 | 32000 | 16000 | 2000 | .8025 | .1975 | 32615 | 16051 | 1975 | 32640 | 16000 | 2000 | -640  | .50   |
| 50000 | 1.03 | .80 | .2000 | 32000 | 16000 | 2000 | .8038 | .1962 | 32922 | 16075 | 1962 | 32960 | 16000 | 2000 | -960  | 1.12  |
| 50000 | 1.04 | .80 | .2000 | 32000 | 16000 | 2000 | .8050 | .1950 | 33230 | 16100 | 1950 | 33280 | 16000 | 2000 | -1280 | 1.97  |
| 50000 | 1.05 | .80 | .2000 | 32000 | 16000 | 2000 | .8062 | .1938 | 33538 | 16124 | 1938 | 33600 | 16000 | 2000 | -1600 | 3.05  |
| 50000 | 1.06 | .80 | .2000 | 32000 | 16000 | 2000 | .8074 | .1926 | 33846 | 16148 | 1926 | 33920 | 16000 | 2000 | -1920 | 4.36  |
| 50000 | 1.07 | .80 | .2000 | 32000 | 16000 | 2000 | .8086 | .1914 | 34154 | 16172 | 1914 | 34240 | 16000 | 2000 | -2240 | 5.88  |
| 50000 | 1.08 | .80 | .2000 | 32000 | 16000 | 2000 | .8097 | .1903 | 34463 | 16195 | 1903 | 34560 | 16000 | 2000 | -2560 | 7.61  |
| 50000 | 1.09 | .80 | .2000 | 32000 | 16000 | 2000 | .8109 | .1891 | 34771 | 16218 | 1891 | 34880 | 16000 | 2000 | -2880 | 9.54  |
| 50000 | 1.10 | .80 | .2000 | 32000 | 16000 | 2000 | .8120 | .1880 | 35080 | 16241 | 1880 | 35200 | 16000 | 2000 | -3200 | 11.68 |
| 50000 | 1.11 | .80 | .2000 | 32000 | 16000 | 2000 | .8132 | .1868 | 35388 | 16263 | 1868 | 35520 | 16000 | 2000 | -3520 | 14.01 |
| 50000 | 1.12 | .80 | .2000 | 32000 | 16000 | 2000 | .8143 | .1857 | 35697 | 16285 | 1857 | 35840 | 16000 | 2000 | -3840 | 16.52 |
| 50000 | 1.13 | .80 | .2000 | 32000 | 16000 | 2000 | .8154 | .1846 | 36006 | 16307 | 1846 | 36160 | 16000 | 2000 | -4160 | 19.23 |
| 50000 | 1.14 | .80 | .2000 | 32000 | 16000 | 2000 | .8164 | .1836 | 36316 | 16329 | 1836 | 36480 | 16000 | 2000 | -4480 | 22.11 |
| 50000 | 1.15 | .80 | .2000 | 32000 | 16000 | 2000 | .8175 | .1825 | 36625 | 16350 | 1825 | 36800 | 16000 | 2000 | -4800 | 25.16 |
| 50000 | 1.16 | .80 | .2000 | 32000 | 16000 | 2000 | .8186 | .1814 | 36934 | 16372 | 1814 | 37120 | 16000 | 2000 | -5120 | 28.39 |
| 50000 | 1.17 | .80 | .2000 | 32000 | 16000 | 2000 | .8196 | .1804 | 37244 | 16392 | 1804 | 37440 | 16000 | 2000 | -5440 | 31.78 |
| 50000 | 1.18 | .80 | .2000 | 32000 | 16000 | 2000 | .8207 | .1793 | 37553 | 16413 | 1793 | 37760 | 16000 | 2000 | -5760 | 35.34 |
| 50000 | 1.19 | .80 | .2000 | 32000 | 16000 | 2000 | .8217 | .1783 | 37863 | 16434 | 1783 | 38080 | 16000 | 2000 | -6080 | 39.05 |

|       |      |     |       |       |       |      |       |       |       |       |      |       |       |      |       |       |
|-------|------|-----|-------|-------|-------|------|-------|-------|-------|-------|------|-------|-------|------|-------|-------|
| 50000 | 1.20 | .80 | .2000 | 32000 | 16000 | 2000 | .8227 | .1773 | 38173 | 16454 | 1773 | 38400 | 16000 | 2000 | -6400 | 42.92 |
| 50000 | .80  | .85 | .1500 | 36125 | 12750 | 1125 | .8247 | .1753 | 29090 | 12370 | 1315 | 28900 | 12750 | 1125 | 7225  | 40.38 |
| 50000 | .81  | .85 | .1500 | 36125 | 12750 | 1125 | .8261 | .1739 | 29440 | 12392 | 1304 | 29261 | 12750 | 1125 | 6864  | 36.01 |
| 50000 | .82  | .85 | .1500 | 36125 | 12750 | 1125 | .8276 | .1724 | 29791 | 12414 | 1293 | 29623 | 12750 | 1125 | 6503  | 31.93 |
| 50000 | .83  | .85 | .1500 | 36125 | 12750 | 1125 | .8290 | .1710 | 30141 | 12435 | 1283 | 29984 | 12750 | 1125 | 6141  | 28.15 |
| 50000 | .84  | .85 | .1500 | 36125 | 12750 | 1125 | .8304 | .1696 | 30492 | 12456 | 1272 | 30345 | 12750 | 1125 | 5780  | 24.65 |
| 50000 | .85  | .85 | .1500 | 36125 | 12750 | 1125 | .8318 | .1682 | 30843 | 12477 | 1262 | 30706 | 12750 | 1125 | 5419  | 21.42 |
| 50000 | .86  | .85 | .1500 | 36125 | 12750 | 1125 | .8331 | .1669 | 31194 | 12497 | 1252 | 31068 | 12750 | 1125 | 5058  | 18.45 |
| 50000 | .87  | .85 | .1500 | 36125 | 12750 | 1125 | .8345 | .1655 | 31545 | 12517 | 1242 | 31429 | 12750 | 1125 | 4696  | 15.73 |
| 50000 | .88  | .85 | .1500 | 36125 | 12750 | 1125 | .8358 | .1642 | 31897 | 12536 | 1232 | 31790 | 12750 | 1125 | 4335  | 13.26 |
| 50000 | .89  | .85 | .1500 | 36125 | 12750 | 1125 | .8370 | .1630 | 32248 | 12556 | 1222 | 32151 | 12750 | 1125 | 3974  | 11.02 |
| 50000 | .90  | .85 | .1500 | 36125 | 12750 | 1125 | .8383 | .1617 | 32600 | 12575 | 1213 | 32513 | 12750 | 1125 | 3613  | 9.01  |
| 50000 | .91  | .85 | .1500 | 36125 | 12750 | 1125 | .8396 | .1604 | 32952 | 12594 | 1203 | 32874 | 12750 | 1125 | 3251  | 7.22  |
| 50000 | .92  | .85 | .1500 | 36125 | 12750 | 1125 | .8408 | .1592 | 33304 | 12612 | 1194 | 33235 | 12750 | 1125 | 2890  | 5.64  |
| 50000 | .93  | .85 | .1500 | 36125 | 12750 | 1125 | .8420 | .1580 | 33656 | 12630 | 1185 | 33596 | 12750 | 1125 | 2529  | 4.27  |
| 50000 | .94  | .85 | .1500 | 36125 | 12750 | 1125 | .8432 | .1568 | 34008 | 12648 | 1176 | 33958 | 12750 | 1125 | 2168  | 3.11  |
| 50000 | .95  | .85 | .1500 | 36125 | 12750 | 1125 | .8444 | .1556 | 34361 | 12666 | 1167 | 34319 | 12750 | 1125 | 1806  | 2.14  |
| 50000 | .96  | .85 | .1500 | 36125 | 12750 | 1125 | .8455 | .1545 | 34713 | 12683 | 1158 | 34680 | 12750 | 1125 | 1445  | 1.35  |
| 50000 | .97  | .85 | .1500 | 36125 | 12750 | 1125 | .8467 | .1533 | 35066 | 12700 | 1150 | 35041 | 12750 | 1125 | 1084  | .75   |
| 50000 | .98  | .85 | .1500 | 36125 | 12750 | 1125 | .8478 | .1522 | 35419 | 12717 | 1141 | 35403 | 12750 | 1125 | 723   | .33   |
| 50000 | .99  | .85 | .1500 | 36125 | 12750 | 1125 | .8489 | .1511 | 35772 | 12734 | 1133 | 35764 | 12750 | 1125 | 361   | .08   |
| 50000 | 1.00 | .85 | .1500 | 36125 | 12750 | 1125 | .8500 | .1500 | 36125 | 12750 | 1125 | 36125 | 12750 | 1125 | 0     | .00   |
| 50000 | 1.01 | .85 | .1500 | 36125 | 12750 | 1125 | .8511 | .1489 | 36478 | 12766 | 1117 | 36486 | 12750 | 1125 | -361  | .08   |
| 50000 | 1.02 | .85 | .1500 | 36125 | 12750 | 1125 | .8521 | .1479 | 36831 | 12782 | 1109 | 36848 | 12750 | 1125 | -723  | .32   |
| 50000 | 1.03 | .85 | .1500 | 36125 | 12750 | 1125 | .8532 | .1468 | 37185 | 12798 | 1101 | 37209 | 12750 | 1125 | -1084 | .71   |
| 50000 | 1.04 | .85 | .1500 | 36125 | 12750 | 1125 | .8542 | .1458 | 37538 | 12813 | 1093 | 37570 | 12750 | 1125 | -1445 | 1.25  |
| 50000 | 1.05 | .85 | .1500 | 36125 | 12750 | 1125 | .8552 | .1448 | 37892 | 12828 | 1086 | 37931 | 12750 | 1125 | -1806 | 1.94  |
| 50000 | 1.06 | .85 | .1500 | 36125 | 12750 | 1125 | .8562 | .1438 | 38246 | 12843 | 1078 | 38293 | 12750 | 1125 | -2168 | 2.76  |
| 50000 | 1.07 | .85 | .1500 | 36125 | 12750 | 1125 | .8572 | .1428 | 38600 | 12858 | 1071 | 38654 | 12750 | 1125 | -2529 | 3.73  |
| 50000 | 1.08 | .85 | .1500 | 36125 | 12750 | 1125 | .8582 | .1418 | 38954 | 12873 | 1064 | 39015 | 12750 | 1125 | -2890 | 4.82  |
| 50000 | 1.09 | .85 | .1500 | 36125 | 12750 | 1125 | .8592 | .1408 | 39308 | 12887 | 1056 | 39376 | 12750 | 1125 | -3251 | 6.05  |
| 50000 | 1.10 | .85 | .1500 | 36125 | 12750 | 1125 | .8601 | .1399 | 39662 | 12902 | 1049 | 39738 | 12750 | 1125 | -3613 | 7.40  |
| 50000 | 1.11 | .85 | .1500 | 36125 | 12750 | 1125 | .8610 | .1390 | 40016 | 12916 | 1042 | 40099 | 12750 | 1125 | -3974 | 8.88  |

|       |      |     |       |       |       |      |       |       |       |       |      |       |       |      |       |       |
|-------|------|-----|-------|-------|-------|------|-------|-------|-------|-------|------|-------|-------|------|-------|-------|
| 50000 | 1.12 | .85 | .1500 | 36125 | 12750 | 1125 | .8620 | .1380 | 40370 | 12930 | 1035 | 40460 | 12750 | 1125 | -4335 | 10.47 |
| 50000 | 1.13 | .85 | .1500 | 36125 | 12750 | 1125 | .8629 | .1371 | 40725 | 12943 | 1028 | 40821 | 12750 | 1125 | -4696 | 12.19 |
| 50000 | 1.14 | .85 | .1500 | 36125 | 12750 | 1125 | .8638 | .1362 | 41079 | 12957 | 1022 | 41183 | 12750 | 1125 | -5058 | 14.01 |
| 50000 | 1.15 | .85 | .1500 | 36125 | 12750 | 1125 | .8647 | .1353 | 41434 | 12970 | 1015 | 41544 | 12750 | 1125 | -5419 | 15.95 |
| 50000 | 1.16 | .85 | .1500 | 36125 | 12750 | 1125 | .8655 | .1345 | 41788 | 12983 | 1008 | 41905 | 12750 | 1125 | -5780 | 17.99 |
| 50000 | 1.17 | .85 | .1500 | 36125 | 12750 | 1125 | .8664 | .1336 | 42143 | 12996 | 1002 | 42266 | 12750 | 1125 | -6141 | 20.14 |
| 50000 | 1.18 | .85 | .1500 | 36125 | 12750 | 1125 | .8673 | .1327 | 42498 | 13009 | 996  | 42628 | 12750 | 1125 | -6503 | 22.39 |
| 50000 | 1.19 | .85 | .1500 | 36125 | 12750 | 1125 | .8681 | .1319 | 42853 | 13022 | 989  | 42989 | 12750 | 1125 | -6864 | 24.74 |
| 50000 | 1.20 | .85 | .1500 | 36125 | 12750 | 1125 | .8689 | .1311 | 43208 | 13034 | 983  | 43350 | 12750 | 1125 | -7225 | 27.18 |
| 50000 | .80  | .90 | .1000 | 40500 | 9000  | 500  | .8807 | .1193 | 32497 | 8807  | 597  | 32400 | 9000  | 500  | 8100  | 20.19 |
| 50000 | .81  | .90 | .1000 | 40500 | 9000  | 500  | .8818 | .1182 | 32896 | 8818  | 591  | 32805 | 9000  | 500  | 7695  | 18.00 |
| 50000 | .82  | .90 | .1000 | 40500 | 9000  | 500  | .8829 | .1171 | 33295 | 8829  | 585  | 33210 | 9000  | 500  | 7290  | 15.96 |
| 50000 | .83  | .90 | .1000 | 40500 | 9000  | 500  | .8840 | .1160 | 33695 | 8840  | 580  | 33615 | 9000  | 500  | 6885  | 14.07 |
| 50000 | .84  | .90 | .1000 | 40500 | 9000  | 500  | .8851 | .1149 | 34094 | 8851  | 574  | 34020 | 9000  | 500  | 6480  | 12.32 |
| 50000 | .85  | .90 | .1000 | 40500 | 9000  | 500  | .8862 | .1138 | 34494 | 8862  | 569  | 34425 | 9000  | 500  | 6075  | 10.70 |
| 50000 | .86  | .90 | .1000 | 40500 | 9000  | 500  | .8872 | .1128 | 34894 | 8872  | 564  | 34830 | 9000  | 500  | 5670  | 9.21  |
| 50000 | .87  | .90 | .1000 | 40500 | 9000  | 500  | .8882 | .1118 | 35294 | 8882  | 559  | 35235 | 9000  | 500  | 5265  | 7.85  |
| 50000 | .88  | .90 | .1000 | 40500 | 9000  | 500  | .8892 | .1108 | 35694 | 8892  | 554  | 35640 | 9000  | 500  | 4860  | 6.62  |
| 50000 | .89  | .90 | .1000 | 40500 | 9000  | 500  | .8902 | .1098 | 36094 | 8902  | 549  | 36045 | 9000  | 500  | 4455  | 5.50  |
| 50000 | .90  | .90 | .1000 | 40500 | 9000  | 500  | .8912 | .1088 | 36494 | 8912  | 544  | 36450 | 9000  | 500  | 4050  | 4.49  |
| 50000 | .91  | .90 | .1000 | 40500 | 9000  | 500  | .8921 | .1079 | 36894 | 8921  | 539  | 36855 | 9000  | 500  | 3645  | 3.60  |
| 50000 | .92  | .90 | .1000 | 40500 | 9000  | 500  | .8931 | .1069 | 37295 | 8931  | 535  | 37260 | 9000  | 500  | 3240  | 2.81  |
| 50000 | .93  | .90 | .1000 | 40500 | 9000  | 500  | .8940 | .1060 | 37695 | 8940  | 530  | 37665 | 9000  | 500  | 2835  | 2.13  |
| 50000 | .94  | .90 | .1000 | 40500 | 9000  | 500  | .8949 | .1051 | 38096 | 8949  | 526  | 38070 | 9000  | 500  | 2430  | 1.55  |
| 50000 | .95  | .90 | .1000 | 40500 | 9000  | 500  | .8958 | .1042 | 38496 | 8958  | 521  | 38475 | 9000  | 500  | 2025  | 1.07  |
| 50000 | .96  | .90 | .1000 | 40500 | 9000  | 500  | .8967 | .1033 | 38897 | 8967  | 517  | 38880 | 9000  | 500  | 1620  | .67   |
| 50000 | .97  | .90 | .1000 | 40500 | 9000  | 500  | .8975 | .1025 | 39297 | 8975  | 512  | 39285 | 9000  | 500  | 1215  | .38   |
| 50000 | .98  | .90 | .1000 | 40500 | 9000  | 500  | .8984 | .1016 | 39698 | 8984  | 508  | 39690 | 9000  | 500  | 810   | .17   |
| 50000 | .99  | .90 | .1000 | 40500 | 9000  | 500  | .8992 | .1008 | 40099 | 8992  | 504  | 40095 | 9000  | 500  | 405   | .04   |
| 50000 | 1.00 | .90 | .1000 | 40500 | 9000  | 500  | .9000 | .1000 | 40500 | 9000  | 500  | 40500 | 9000  | 500  | 0     | .00   |
| 50000 | 1.01 | .90 | .1000 | 40500 | 9000  | 500  | .9008 | .0992 | 40901 | 9008  | 496  | 40905 | 9000  | 500  | -405  | .04   |
| 50000 | 1.02 | .90 | .1000 | 40500 | 9000  | 500  | .9016 | .0984 | 41302 | 9016  | 492  | 41310 | 9000  | 500  | -810  | .16   |
| 50000 | 1.03 | .90 | .1000 | 40500 | 9000  | 500  | .9024 | .0976 | 41703 | 9024  | 488  | 41715 | 9000  | 500  | -1215 | .35   |

|       |      |     |       |       |      |     |       |       |       |      |     |       |      |     |       |       |
|-------|------|-----|-------|-------|------|-----|-------|-------|-------|------|-----|-------|------|-----|-------|-------|
| 50000 | 1.04 | .90 | .1000 | 40500 | 9000 | 500 | .9031 | .0969 | 42104 | 9031 | 484 | 42120 | 9000 | 500 | -1620 | .62   |
| 50000 | 1.05 | .90 | .1000 | 40500 | 9000 | 500 | .9039 | .0961 | 42506 | 9039 | 481 | 42525 | 9000 | 500 | -2025 | .96   |
| 50000 | 1.06 | .90 | .1000 | 40500 | 9000 | 500 | .9046 | .0954 | 42907 | 9046 | 477 | 42930 | 9000 | 500 | -2430 | 1.38  |
| 50000 | 1.07 | .90 | .1000 | 40500 | 9000 | 500 | .9054 | .0946 | 43308 | 9054 | 473 | 43335 | 9000 | 500 | -2835 | 1.86  |
| 50000 | 1.08 | .90 | .1000 | 40500 | 9000 | 500 | .9061 | .0939 | 43710 | 9061 | 470 | 43740 | 9000 | 500 | -3240 | 2.40  |
| 50000 | 1.09 | .90 | .1000 | 40500 | 9000 | 500 | .9068 | .0932 | 44111 | 9068 | 466 | 44145 | 9000 | 500 | -3645 | 3.01  |
| 50000 | 1.10 | .90 | .1000 | 40500 | 9000 | 500 | .9075 | .0925 | 44513 | 9075 | 463 | 44550 | 9000 | 500 | -4050 | 3.68  |
| 50000 | 1.11 | .90 | .1000 | 40500 | 9000 | 500 | .9082 | .0918 | 44914 | 9082 | 459 | 44955 | 9000 | 500 | -4455 | 4.42  |
| 50000 | 1.12 | .90 | .1000 | 40500 | 9000 | 500 | .9089 | .0911 | 45316 | 9089 | 456 | 45360 | 9000 | 500 | -4860 | 5.21  |
| 50000 | 1.13 | .90 | .1000 | 40500 | 9000 | 500 | .9095 | .0905 | 45717 | 9095 | 452 | 45765 | 9000 | 500 | -5265 | 6.06  |
| 50000 | 1.14 | .90 | .1000 | 40500 | 9000 | 500 | .9102 | .0898 | 46119 | 9102 | 449 | 46170 | 9000 | 500 | -5670 | 6.97  |
| 50000 | 1.15 | .90 | .1000 | 40500 | 9000 | 500 | .9108 | .0892 | 46521 | 9108 | 446 | 46575 | 9000 | 500 | -6075 | 7.93  |
| 50000 | 1.16 | .90 | .1000 | 40500 | 9000 | 500 | .9115 | .0885 | 46923 | 9115 | 443 | 46980 | 9000 | 500 | -6480 | 8.95  |
| 50000 | 1.17 | .90 | .1000 | 40500 | 9000 | 500 | .9121 | .0879 | 47324 | 9121 | 439 | 47385 | 9000 | 500 | -6885 | 10.02 |
| 50000 | 1.18 | .90 | .1000 | 40500 | 9000 | 500 | .9127 | .0873 | 47726 | 9127 | 436 | 47790 | 9000 | 500 | -7290 | 11.14 |
| 50000 | 1.19 | .90 | .1000 | 40500 | 9000 | 500 | .9133 | .0867 | 48128 | 9133 | 433 | 48195 | 9000 | 500 | -7695 | 12.30 |
| 50000 | 1.20 | .90 | .1000 | 40500 | 9000 | 500 | .9139 | .0861 | 48530 | 9139 | 430 | 48600 | 9000 | 500 | -8100 | 13.52 |
| 50000 | .80  | .95 | .0500 | 45125 | 4750 | 125 | .9390 | .0610 | 36128 | 4695 | 153 | 36100 | 4750 | 125 | 9025  | 5.64  |
| 50000 | .81  | .95 | .0500 | 45125 | 4750 | 125 | .9397 | .0603 | 36577 | 4698 | 151 | 36551 | 4750 | 125 | 8574  | 5.02  |
| 50000 | .82  | .95 | .0500 | 45125 | 4750 | 125 | .9403 | .0597 | 37027 | 4702 | 149 | 37003 | 4750 | 125 | 8123  | 4.45  |
| 50000 | .83  | .95 | .0500 | 45125 | 4750 | 125 | .9409 | .0591 | 37476 | 4705 | 148 | 37454 | 4750 | 125 | 7671  | 3.93  |
| 50000 | .84  | .95 | .0500 | 45125 | 4750 | 125 | .9416 | .0584 | 37926 | 4708 | 146 | 37905 | 4750 | 125 | 7220  | 3.44  |
| 50000 | .85  | .95 | .0500 | 45125 | 4750 | 125 | .9422 | .0578 | 38376 | 4711 | 145 | 38356 | 4750 | 125 | 6769  | 2.98  |
| 50000 | .86  | .95 | .0500 | 45125 | 4750 | 125 | .9428 | .0572 | 38826 | 4714 | 143 | 38808 | 4750 | 125 | 6318  | 2.57  |
| 50000 | .87  | .95 | .0500 | 45125 | 4750 | 125 | .9434 | .0566 | 39275 | 4717 | 142 | 39259 | 4750 | 125 | 5866  | 2.19  |
| 50000 | .88  | .95 | .0500 | 45125 | 4750 | 125 | .9439 | .0561 | 39725 | 4720 | 140 | 39710 | 4750 | 125 | 5415  | 1.85  |
| 50000 | .89  | .95 | .0500 | 45125 | 4750 | 125 | .9445 | .0555 | 40175 | 4722 | 139 | 40161 | 4750 | 125 | 4964  | 1.53  |
| 50000 | .90  | .95 | .0500 | 45125 | 4750 | 125 | .9450 | .0550 | 40625 | 4725 | 137 | 40613 | 4750 | 125 | 4513  | 1.25  |
| 50000 | .91  | .95 | .0500 | 45125 | 4750 | 125 | .9456 | .0544 | 41075 | 4728 | 136 | 41064 | 4750 | 125 | 4061  | 1.00  |
| 50000 | .92  | .95 | .0500 | 45125 | 4750 | 125 | .9461 | .0539 | 41525 | 4731 | 135 | 41515 | 4750 | 125 | 3610  | .78   |
| 50000 | .93  | .95 | .0500 | 45125 | 4750 | 125 | .9466 | .0534 | 41975 | 4733 | 133 | 41966 | 4750 | 125 | 3159  | .59   |
| 50000 | .94  | .95 | .0500 | 45125 | 4750 | 125 | .9471 | .0529 | 42425 | 4736 | 132 | 42418 | 4750 | 125 | 2708  | .43   |
| 50000 | .95  | .95 | .0500 | 45125 | 4750 | 125 | .9476 | .0524 | 42875 | 4738 | 131 | 42869 | 4750 | 125 | 2256  | .30   |

|       |      |      |       |       |      |     |            |       |       |      |     |       |      |     |       |      |
|-------|------|------|-------|-------|------|-----|------------|-------|-------|------|-----|-------|------|-----|-------|------|
| 50000 | .96  | .95  | .0500 | 45125 | 4750 | 125 | .9481      | .0519 | 43325 | 4741 | 130 | 43320 | 4750 | 125 | 1805  | .19  |
| 50000 | .97  | .95  | .0500 | 45125 | 4750 | 125 | .9486      | .0514 | 43775 | 4743 | 128 | 43771 | 4750 | 125 | 1354  | .10  |
| 50000 | .98  | .95  | .0500 | 45125 | 4750 | 125 | .9491      | .0509 | 44225 | 4745 | 127 | 44223 | 4750 | 125 | 903   | .05  |
| 50000 | .99  | .95  | .0500 | 45125 | 4750 | 125 | .9495      | .0505 | 44675 | 4748 | 126 | 44674 | 4750 | 125 | 451   | .01  |
| 50000 | 1.00 | .95  | .0500 | 45125 | 4750 | 125 | .9500      | .0500 | 45125 | 4750 | 125 | 45125 | 4750 | 125 | 0     | .00  |
| 50000 | 1.01 | .95  | .0500 | 45125 | 4750 | 125 | .9504      | .0496 | 45575 | 4752 | 124 | 45576 | 4750 | 125 | -451  | .01  |
| 50000 | 1.02 | .95  | .0500 | 45125 | 4750 | 125 | .9509      | .0491 | 46025 | 4754 | 123 | 46028 | 4750 | 125 | -903  | .04  |
| 50000 | 1.03 | .95  | .0500 | 45125 | 4750 | 125 | .9513      | .0487 | 46475 | 4757 | 122 | 46479 | 4750 | 125 | -1354 | .10  |
| 50000 | 1.04 | .95  | .0500 | 45125 | 4750 | 125 | .9517      | .0483 | 46926 | 4759 | 121 | 46930 | 4750 | 125 | -1805 | .17  |
| 50000 | 1.05 | .95  | .0500 | 45125 | 4750 | 125 | .9522      | .0478 | 47376 | 4761 | 120 | 47381 | 4750 | 125 | -2256 | .27  |
| 50000 | 1.06 | .95  | .0500 | 45125 | 4750 | 125 | .9526      | .0474 | 47826 | 4763 | 119 | 47833 | 4750 | 125 | -2708 | .38  |
| 50000 | 1.07 | .95  | .0500 | 45125 | 4750 | 125 | .9530      | .0470 | 48276 | 4765 | 118 | 48284 | 4750 | 125 | -3159 | .52  |
| 50000 | 1.08 | .95  | .0500 | 45125 | 4750 | 125 | .9534      | .0466 | 48727 | 4767 | 117 | 48735 | 4750 | 125 | -3610 | .67  |
| 50000 | 1.09 | .95  | .0500 | 45125 | 4750 | 125 | .9538      | .0462 | 49177 | 4769 | 116 | 49186 | 4750 | 125 | -4061 | .84  |
| 50000 | 1.10 | .95  | .0500 | 45125 | 4750 | 125 | .9541      | .0459 | 49627 | 4771 | 115 | 49638 | 4750 | 125 | -4513 | 1.03 |
| 50000 | 1.11 | .95  | .0500 | 45125 | 4750 | 125 | .9545      | .0455 | 50077 | 4773 | 114 | 50089 | 4750 | 125 | -4964 | 1.23 |
| 50000 | 1.12 | .95  | .0500 | 45125 | 4750 | 125 | .9549      | .0451 | 50528 | 4774 | 113 | 50540 | 4750 | 125 | -5415 | 1.45 |
| 50000 | 1.13 | .95  | .0500 | 45125 | 4750 | 125 | .9553      | .0447 | 50978 | 4776 | 112 | 50991 | 4750 | 125 | -5866 | 1.69 |
| 50000 | 1.14 | .95  | .0500 | 45125 | 4750 | 125 | .9556      | .0444 | 51428 | 4778 | 111 | 51443 | 4750 | 125 | -6318 | 1.94 |
| 50000 | 1.15 | .95  | .0500 | 45125 | 4750 | 125 | .9560      | .0440 | 51879 | 4780 | 110 | 51894 | 4750 | 125 | -6769 | 2.21 |
| 50000 | 1.16 | .95  | .0500 | 45125 | 4750 | 125 | .9563      | .0437 | 52329 | 4782 | 109 | 52345 | 4750 | 125 | -7220 | 2.49 |
| 50000 | 1.17 | .95  | .0500 | 45125 | 4750 | 125 | .9567      | .0433 | 52780 | 4783 | 108 | 52796 | 4750 | 125 | -7671 | 2.79 |
| 50000 | 1.18 | .95  | .0500 | 45125 | 4750 | 125 | .9570      | .0430 | 53230 | 4785 | 108 | 53248 | 4750 | 125 | -8123 | 3.10 |
| 50000 | 1.19 | .95  | .0500 | 45125 | 4750 | 125 | .9573      | .0427 | 53680 | 4787 | 107 | 53699 | 4750 | 125 | -8574 | 3.42 |
| 50000 | 1.20 | .95  | .0500 | 45125 | 4750 | 125 | .9576      | .0424 | 54131 | 4788 | 106 | 54150 | 4750 | 125 | -9025 | 3.76 |
| 50000 | .80  | 1.00 | .0000 | 50000 | 0    | 0   | 1.000<br>0 | .0000 | 40000 | 0    | 0   | 40000 | 0    | 0   | 10000 | 3.76 |
| 50000 | .81  | 1.00 | .0000 | 50000 | 0    | 0   | 1.000<br>0 | .0000 | 40500 | 0    | 0   | 40500 | 0    | 0   | 9500  | 3.76 |
| 50000 | .82  | 1.00 | .0000 | 50000 | 0    | 0   | 1.000<br>0 | .0000 | 41000 | 0    | 0   | 41000 | 0    | 0   | 9000  | 3.76 |
| 50000 | .83  | 1.00 | .0000 | 50000 | 0    | 0   | 1.000<br>0 | .0000 | 41500 | 0    | 0   | 41500 | 0    | 0   | 8500  | 3.76 |

|       |      |      |       |       |   |   |            |       |       |   |   |       |   |   |      |      |
|-------|------|------|-------|-------|---|---|------------|-------|-------|---|---|-------|---|---|------|------|
| 50000 | .84  | 1.00 | .0000 | 50000 | 0 | 0 | 1.000<br>0 | .0000 | 42000 | 0 | 0 | 42000 | 0 | 0 | 8000 | 3.76 |
| 50000 | .85  | 1.00 | .0000 | 50000 | 0 | 0 | 1.000<br>0 | .0000 | 42500 | 0 | 0 | 42500 | 0 | 0 | 7500 | 3.76 |
| 50000 | .86  | 1.00 | .0000 | 50000 | 0 | 0 | 1.000<br>0 | .0000 | 43000 | 0 | 0 | 43000 | 0 | 0 | 7000 | 3.76 |
| 50000 | .87  | 1.00 | .0000 | 50000 | 0 | 0 | 1.000<br>0 | .0000 | 43500 | 0 | 0 | 43500 | 0 | 0 | 6500 | 3.76 |
| 50000 | .88  | 1.00 | .0000 | 50000 | 0 | 0 | 1.000<br>0 | .0000 | 44000 | 0 | 0 | 44000 | 0 | 0 | 6000 | 3.76 |
| 50000 | .89  | 1.00 | .0000 | 50000 | 0 | 0 | 1.000<br>0 | .0000 | 44500 | 0 | 0 | 44500 | 0 | 0 | 5500 | 3.76 |
| 50000 | .90  | 1.00 | .0000 | 50000 | 0 | 0 | 1.000<br>0 | .0000 | 45000 | 0 | 0 | 45000 | 0 | 0 | 5000 | 3.76 |
| 50000 | .91  | 1.00 | .0000 | 50000 | 0 | 0 | 1.000<br>0 | .0000 | 45500 | 0 | 0 | 45500 | 0 | 0 | 4500 | 3.76 |
| 50000 | .92  | 1.00 | .0000 | 50000 | 0 | 0 | 1.000<br>0 | .0000 | 46000 | 0 | 0 | 46000 | 0 | 0 | 4000 | 3.76 |
| 50000 | .93  | 1.00 | .0000 | 50000 | 0 | 0 | 1.000<br>0 | .0000 | 46500 | 0 | 0 | 46500 | 0 | 0 | 3500 | 3.76 |
| 50000 | .94  | 1.00 | .0000 | 50000 | 0 | 0 | 1.000<br>0 | .0000 | 47000 | 0 | 0 | 47000 | 0 | 0 | 3000 | 3.76 |
| 50000 | .95  | 1.00 | .0000 | 50000 | 0 | 0 | 1.000<br>0 | .0000 | 47500 | 0 | 0 | 47500 | 0 | 0 | 2500 | 3.76 |
| 50000 | .96  | 1.00 | .0000 | 50000 | 0 | 0 | 1.000<br>0 | .0000 | 48000 | 0 | 0 | 48000 | 0 | 0 | 2000 | 3.76 |
| 50000 | .97  | 1.00 | .0000 | 50000 | 0 | 0 | 1.000<br>0 | .0000 | 48500 | 0 | 0 | 48500 | 0 | 0 | 1500 | 3.76 |
| 50000 | .98  | 1.00 | .0000 | 50000 | 0 | 0 | 1.000<br>0 | .0000 | 49000 | 0 | 0 | 49000 | 0 | 0 | 1000 | 3.76 |
| 50000 | .99  | 1.00 | .0000 | 50000 | 0 | 0 | 1.000<br>0 | .0000 | 49500 | 0 | 0 | 49500 | 0 | 0 | 500  | 3.76 |
| 50000 | 1.00 | 1.00 | .0000 | 50000 | 0 | 0 | 1.000<br>0 | .0000 | 50000 | 0 | 0 | 50000 | 0 | 0 | 0    | 3.76 |



|       |      |      |       |       |   |   |            |       |       |   |   |       |   |   |       |      |
|-------|------|------|-------|-------|---|---|------------|-------|-------|---|---|-------|---|---|-------|------|
| 50000 | 1.01 | 1.00 | .0000 | 50000 | 0 | 0 | 1.000<br>0 | .0000 | 50500 | 0 | 0 | 50500 | 0 | 0 | -500  | 3.76 |
| 50000 | 1.02 | 1.00 | .0000 | 50000 | 0 | 0 | 1.000<br>0 | .0000 | 51000 | 0 | 0 | 51000 | 0 | 0 | -1000 | 3.76 |
| 50000 | 1.03 | 1.00 | .0000 | 50000 | 0 | 0 | 1.000<br>0 | .0000 | 51500 | 0 | 0 | 51500 | 0 | 0 | -1500 | 3.76 |
| 50000 | 1.04 | 1.00 | .0000 | 50000 | 0 | 0 | 1.000<br>0 | .0000 | 52000 | 0 | 0 | 52000 | 0 | 0 | -2000 | 3.76 |
| 50000 | 1.05 | 1.00 | .0000 | 50000 | 0 | 0 | 1.000<br>0 | .0000 | 52500 | 0 | 0 | 52500 | 0 | 0 | -2500 | 3.76 |
| 50000 | 1.06 | 1.00 | .0000 | 50000 | 0 | 0 | 1.000<br>0 | .0000 | 53000 | 0 | 0 | 53000 | 0 | 0 | -3000 | 3.76 |
| 50000 | 1.07 | 1.00 | .0000 | 50000 | 0 | 0 | 1.000<br>0 | .0000 | 53500 | 0 | 0 | 53500 | 0 | 0 | -3500 | 3.76 |
| 50000 | 1.08 | 1.00 | .0000 | 50000 | 0 | 0 | 1.000<br>0 | .0000 | 54000 | 0 | 0 | 54000 | 0 | 0 | -4000 | 3.76 |
| 50000 | 1.09 | 1.00 | .0000 | 50000 | 0 | 0 | 1.000<br>0 | .0000 | 54500 | 0 | 0 | 54500 | 0 | 0 | -4500 | 3.76 |
| 50000 | 1.10 | 1.00 | .0000 | 50000 | 0 | 0 | 1.000<br>0 | .0000 | 55000 | 0 | 0 | 55000 | 0 | 0 | -5000 | 3.76 |
| 50000 | 1.11 | 1.00 | .0000 | 50000 | 0 | 0 | 1.000<br>0 | .0000 | 55500 | 0 | 0 | 55500 | 0 | 0 | -5500 | 3.76 |
| 50000 | 1.12 | 1.00 | .0000 | 50000 | 0 | 0 | 1.000<br>0 | .0000 | 56000 | 0 | 0 | 56000 | 0 | 0 | -6000 | 3.76 |
| 50000 | 1.13 | 1.00 | .0000 | 50000 | 0 | 0 | 1.000<br>0 | .0000 | 56500 | 0 | 0 | 56500 | 0 | 0 | -6500 | 3.76 |
| 50000 | 1.14 | 1.00 | .0000 | 50000 | 0 | 0 | 1.000<br>0 | .0000 | 57000 | 0 | 0 | 57000 | 0 | 0 | -7000 | 3.76 |
| 50000 | 1.15 | 1.00 | .0000 | 50000 | 0 | 0 | 1.000<br>0 | .0000 | 57500 | 0 | 0 | 57500 | 0 | 0 | -7500 | 3.76 |
| 50000 | 1.16 | 1.00 | .0000 | 50000 | 0 | 0 | 1.000<br>0 | .0000 | 58000 | 0 | 0 | 58000 | 0 | 0 | -8000 | 3.76 |
| 50000 | 1.17 | 1.00 | .0000 | 50000 | 0 | 0 | 1.000<br>0 | .0000 | 58500 | 0 | 0 | 58500 | 0 | 0 | -8500 | 3.76 |

|        |      |      |       |       |      |       |            |       |       |      |       |       |      |       |            |      |
|--------|------|------|-------|-------|------|-------|------------|-------|-------|------|-------|-------|------|-------|------------|------|
| 50000  | 1.18 | 1.00 | .0000 | 50000 | 0    | 0     | 1.000<br>0 | .0000 | 59000 | 0    | 0     | 59000 | 0    | 0     | -9000      | 3.76 |
| 50000  | 1.19 | 1.00 | .0000 | 50000 | 0    | 0     | 1.000<br>0 | .0000 | 59500 | 0    | 0     | 59500 | 0    | 0     | -9500      | 3.76 |
| 50000  | 1.20 | 1.00 | .0000 | 50000 | 0    | 0     | 1.000<br>0 | .0000 | 60000 | 0    | 0     | 60000 | 0    | 0     | -<br>10000 | 3.76 |
| 100000 | .80  | .05  | .9500 | 250   | 9500 | 90250 | .0495      | .9505 | 245   | 9410 | 90295 | 200   | 9500 | 90250 | 50         | 9.20 |
| 100000 | .81  | .05  | .9500 | 250   | 9500 | 90250 | .0495      | .9505 | 245   | 9414 | 90293 | 203   | 9500 | 90250 | 48         | 8.30 |
| 100000 | .82  | .05  | .9500 | 250   | 9500 | 90250 | .0496      | .9504 | 246   | 9419 | 90291 | 205   | 9500 | 90250 | 45         | 7.44 |
| 100000 | .83  | .05  | .9500 | 250   | 9500 | 90250 | .0496      | .9504 | 246   | 9423 | 90288 | 208   | 9500 | 90250 | 43         | 6.63 |
| 100000 | .84  | .05  | .9500 | 250   | 9500 | 90250 | .0496      | .9504 | 246   | 9428 | 90286 | 210   | 9500 | 90250 | 40         | 5.87 |
| 100000 | .85  | .05  | .9500 | 250   | 9500 | 90250 | .0496      | .9504 | 246   | 9432 | 90284 | 213   | 9500 | 90250 | 38         | 5.15 |
| 100000 | .86  | .05  | .9500 | 250   | 9500 | 90250 | .0497      | .9503 | 247   | 9437 | 90282 | 215   | 9500 | 90250 | 35         | 4.48 |
| 100000 | .87  | .05  | .9500 | 250   | 9500 | 90250 | .0497      | .9503 | 247   | 9441 | 90279 | 218   | 9500 | 90250 | 33         | 3.86 |
| 100000 | .88  | .05  | .9500 | 250   | 9500 | 90250 | .0497      | .9503 | 247   | 9446 | 90277 | 220   | 9500 | 90250 | 30         | 3.29 |
| 100000 | .89  | .05  | .9500 | 250   | 9500 | 90250 | .0497      | .9503 | 247   | 9450 | 90275 | 223   | 9500 | 90250 | 28         | 2.76 |
| 100000 | .90  | .05  | .9500 | 250   | 9500 | 90250 | .0498      | .9502 | 248   | 9455 | 90273 | 225   | 9500 | 90250 | 25         | 2.28 |
| 100000 | .91  | .05  | .9500 | 250   | 9500 | 90250 | .0498      | .9502 | 248   | 9459 | 90270 | 228   | 9500 | 90250 | 23         | 1.84 |
| 100000 | .92  | .05  | .9500 | 250   | 9500 | 90250 | .0498      | .9502 | 248   | 9464 | 90268 | 230   | 9500 | 90250 | 20         | 1.46 |
| 100000 | .93  | .05  | .9500 | 250   | 9500 | 90250 | .0498      | .9502 | 248   | 9468 | 90266 | 233   | 9500 | 90250 | 18         | 1.11 |
| 100000 | .94  | .05  | .9500 | 250   | 9500 | 90250 | .0499      | .9501 | 249   | 9473 | 90264 | 235   | 9500 | 90250 | 15         | .82  |
| 100000 | .95  | .05  | .9500 | 250   | 9500 | 90250 | .0499      | .9501 | 249   | 9477 | 90261 | 238   | 9500 | 90250 | 13         | .57  |
| 100000 | .96  | .05  | .9500 | 250   | 9500 | 90250 | .0499      | .9501 | 249   | 9482 | 90259 | 240   | 9500 | 90250 | 10         | .36  |
| 100000 | .97  | .05  | .9500 | 250   | 9500 | 90250 | .0499      | .9501 | 249   | 9486 | 90257 | 243   | 9500 | 90250 | 8          | .20  |
| 100000 | .98  | .05  | .9500 | 250   | 9500 | 90250 | .0500      | .9500 | 250   | 9491 | 90255 | 245   | 9500 | 90250 | 5          | .09  |
| 100000 | .99  | .05  | .9500 | 250   | 9500 | 90250 | .0500      | .9500 | 250   | 9495 | 90252 | 248   | 9500 | 90250 | 3          | .02  |
| 100000 | 1.00 | .05  | .9500 | 250   | 9500 | 90250 | .0500      | .9500 | 250   | 9500 | 90250 | 250   | 9500 | 90250 | 0          | .00  |
| 100000 | 1.01 | .05  | .9500 | 250   | 9500 | 90250 | .0500      | .9500 | 250   | 9505 | 90248 | 253   | 9500 | 90250 | -3         | .02  |
| 100000 | 1.02 | .05  | .9500 | 250   | 9500 | 90250 | .0500      | .9500 | 250   | 9509 | 90245 | 255   | 9500 | 90250 | -5         | .09  |
| 100000 | 1.03 | .05  | .9500 | 250   | 9500 | 90250 | .0501      | .9499 | 251   | 9514 | 90243 | 258   | 9500 | 90250 | -8         | .20  |
| 100000 | 1.04 | .05  | .9500 | 250   | 9500 | 90250 | .0501      | .9499 | 251   | 9518 | 90241 | 260   | 9500 | 90250 | -10        | .36  |
| 100000 | 1.05 | .05  | .9500 | 250   | 9500 | 90250 | .0501      | .9499 | 251   | 9523 | 90239 | 263   | 9500 | 90250 | -13        | .56  |
| 100000 | 1.06 | .05  | .9500 | 250   | 9500 | 90250 | .0501      | .9499 | 251   | 9527 | 90236 | 265   | 9500 | 90250 | -15        | .81  |

|        |      |     |       |      |       |       |       |       |     |       |       |     |       |       |     |       |
|--------|------|-----|-------|------|-------|-------|-------|-------|-----|-------|-------|-----|-------|-------|-----|-------|
| 100000 | 1.07 | .05 | .9500 | 250  | 9500  | 90250 | .0502 | .9498 | 252 | 9532  | 90234 | 268 | 9500  | 90250 | -18 | 1.10  |
| 100000 | 1.08 | .05 | .9500 | 250  | 9500  | 90250 | .0502 | .9498 | 252 | 9536  | 90232 | 270 | 9500  | 90250 | -20 | 1.43  |
| 100000 | 1.09 | .05 | .9500 | 250  | 9500  | 90250 | .0502 | .9498 | 252 | 9541  | 90230 | 273 | 9500  | 90250 | -23 | 1.81  |
| 100000 | 1.10 | .05 | .9500 | 250  | 9500  | 90250 | .0502 | .9498 | 252 | 9545  | 90227 | 275 | 9500  | 90250 | -25 | 2.23  |
| 100000 | 1.11 | .05 | .9500 | 250  | 9500  | 90250 | .0503 | .9497 | 253 | 9550  | 90225 | 278 | 9500  | 90250 | -28 | 2.70  |
| 100000 | 1.12 | .05 | .9500 | 250  | 9500  | 90250 | .0503 | .9497 | 253 | 9554  | 90223 | 280 | 9500  | 90250 | -30 | 3.21  |
| 100000 | 1.13 | .05 | .9500 | 250  | 9500  | 90250 | .0503 | .9497 | 253 | 9559  | 90221 | 283 | 9500  | 90250 | -33 | 3.77  |
| 100000 | 1.14 | .05 | .9500 | 250  | 9500  | 90250 | .0503 | .9497 | 253 | 9563  | 90218 | 285 | 9500  | 90250 | -35 | 4.36  |
| 100000 | 1.15 | .05 | .9500 | 250  | 9500  | 90250 | .0504 | .9496 | 254 | 9568  | 90216 | 288 | 9500  | 90250 | -38 | 5.00  |
| 100000 | 1.16 | .05 | .9500 | 250  | 9500  | 90250 | .0504 | .9496 | 254 | 9572  | 90214 | 290 | 9500  | 90250 | -40 | 5.69  |
| 100000 | 1.17 | .05 | .9500 | 250  | 9500  | 90250 | .0504 | .9496 | 254 | 9577  | 90212 | 293 | 9500  | 90250 | -43 | 6.41  |
| 100000 | 1.18 | .05 | .9500 | 250  | 9500  | 90250 | .0504 | .9496 | 254 | 9581  | 90209 | 295 | 9500  | 90250 | -45 | 7.18  |
| 100000 | 1.19 | .05 | .9500 | 250  | 9500  | 90250 | .0505 | .9495 | 255 | 9586  | 90207 | 298 | 9500  | 90250 | -48 | 8.00  |
| 100000 | 1.20 | .05 | .9500 | 250  | 9500  | 90250 | .0505 | .9495 | 255 | 9590  | 90205 | 300 | 9500  | 90250 | -50 | 8.85  |
| 100000 | .80  | .10 | .9000 | 1000 | 18000 | 81000 | .0982 | .9018 | 962 | 17675 | 81162 | 800 | 18000 | 81000 | 200 | 33.67 |
| 100000 | .81  | .10 | .9000 | 1000 | 18000 | 81000 | .0983 | .9017 | 964 | 17692 | 81154 | 810 | 18000 | 81000 | 190 | 30.33 |
| 100000 | .82  | .10 | .9000 | 1000 | 18000 | 81000 | .0984 | .9016 | 966 | 17708 | 81146 | 820 | 18000 | 81000 | 180 | 27.17 |
| 100000 | .83  | .10 | .9000 | 1000 | 18000 | 81000 | .0985 | .9015 | 968 | 17724 | 81138 | 830 | 18000 | 81000 | 170 | 24.18 |
| 100000 | .84  | .10 | .9000 | 1000 | 18000 | 81000 | .0986 | .9014 | 970 | 17740 | 81130 | 840 | 18000 | 81000 | 160 | 21.38 |
| 100000 | .85  | .10 | .9000 | 1000 | 18000 | 81000 | .0986 | .9014 | 972 | 17757 | 81122 | 850 | 18000 | 81000 | 150 | 18.76 |
| 100000 | .86  | .10 | .9000 | 1000 | 18000 | 81000 | .0987 | .9013 | 974 | 17773 | 81114 | 860 | 18000 | 81000 | 140 | 16.31 |
| 100000 | .87  | .10 | .9000 | 1000 | 18000 | 81000 | .0988 | .9012 | 975 | 17789 | 81105 | 870 | 18000 | 81000 | 130 | 14.03 |
| 100000 | .88  | .10 | .9000 | 1000 | 18000 | 81000 | .0989 | .9011 | 977 | 17805 | 81097 | 880 | 18000 | 81000 | 120 | 11.93 |
| 100000 | .89  | .10 | .9000 | 1000 | 18000 | 81000 | .0990 | .9010 | 979 | 17822 | 81089 | 890 | 18000 | 81000 | 110 | 10.01 |
| 100000 | .90  | .10 | .9000 | 1000 | 18000 | 81000 | .0991 | .9009 | 981 | 17838 | 81081 | 900 | 18000 | 81000 | 100 | 8.26  |
| 100000 | .91  | .10 | .9000 | 1000 | 18000 | 81000 | .0992 | .9008 | 983 | 17854 | 81073 | 910 | 18000 | 81000 | 90  | 6.67  |
| 100000 | .92  | .10 | .9000 | 1000 | 18000 | 81000 | .0993 | .9007 | 985 | 17870 | 81065 | 920 | 18000 | 81000 | 80  | 5.26  |
| 100000 | .93  | .10 | .9000 | 1000 | 18000 | 81000 | .0994 | .9006 | 987 | 17887 | 81057 | 930 | 18000 | 81000 | 70  | 4.02  |
| 100000 | .94  | .10 | .9000 | 1000 | 18000 | 81000 | .0995 | .9005 | 989 | 17903 | 81049 | 940 | 18000 | 81000 | 60  | 2.95  |
| 100000 | .95  | .10 | .9000 | 1000 | 18000 | 81000 | .0995 | .9005 | 991 | 17919 | 81041 | 950 | 18000 | 81000 | 50  | 2.04  |
| 100000 | .96  | .10 | .9000 | 1000 | 18000 | 81000 | .0996 | .9004 | 992 | 17935 | 81032 | 960 | 18000 | 81000 | 40  | 1.31  |
| 100000 | .97  | .10 | .9000 | 1000 | 18000 | 81000 | .0997 | .9003 | 994 | 17951 | 81024 | 970 | 18000 | 81000 | 30  | .73   |
| 100000 | .98  | .10 | .9000 | 1000 | 18000 | 81000 | .0998 | .9002 | 996 | 17968 | 81016 | 980 | 18000 | 81000 | 20  | .33   |

|        |      |     |       |      |       |       |       |       |      |       |       |      |       |       |      |       |
|--------|------|-----|-------|------|-------|-------|-------|-------|------|-------|-------|------|-------|-------|------|-------|
| 100000 | .99  | .10 | .9000 | 1000 | 18000 | 81000 | .0999 | .9001 | 998  | 17984 | 81008 | 990  | 18000 | 81000 | 10   | .08   |
| 100000 | 1.00 | .10 | .9000 | 1000 | 18000 | 81000 | .1000 | .9000 | 1000 | 18000 | 81000 | 1000 | 18000 | 81000 | 0    | .00   |
| 100000 | 1.01 | .10 | .9000 | 1000 | 18000 | 81000 | .1001 | .8999 | 1002 | 18016 | 80992 | 1010 | 18000 | 81000 | -10  | .08   |
| 100000 | 1.02 | .10 | .9000 | 1000 | 18000 | 81000 | .1002 | .8998 | 1004 | 18032 | 80984 | 1020 | 18000 | 81000 | -20  | .32   |
| 100000 | 1.03 | .10 | .9000 | 1000 | 18000 | 81000 | .1003 | .8997 | 1006 | 18049 | 80976 | 1030 | 18000 | 81000 | -30  | .72   |
| 100000 | 1.04 | .10 | .9000 | 1000 | 18000 | 81000 | .1004 | .8996 | 1008 | 18065 | 80968 | 1040 | 18000 | 81000 | -40  | 1.29  |
| 100000 | 1.05 | .10 | .9000 | 1000 | 18000 | 81000 | .1004 | .8996 | 1010 | 18081 | 80960 | 1050 | 18000 | 81000 | -50  | 2.01  |
| 100000 | 1.06 | .10 | .9000 | 1000 | 18000 | 81000 | .1005 | .8995 | 1011 | 18097 | 80951 | 1060 | 18000 | 81000 | -60  | 2.88  |
| 100000 | 1.07 | .10 | .9000 | 1000 | 18000 | 81000 | .1006 | .8994 | 1013 | 18113 | 80943 | 1070 | 18000 | 81000 | -70  | 3.92  |
| 100000 | 1.08 | .10 | .9000 | 1000 | 18000 | 81000 | .1007 | .8993 | 1015 | 18129 | 80935 | 1080 | 18000 | 81000 | -80  | 5.11  |
| 100000 | 1.09 | .10 | .9000 | 1000 | 18000 | 81000 | .1008 | .8992 | 1017 | 18146 | 80927 | 1090 | 18000 | 81000 | -90  | 6.45  |
| 100000 | 1.10 | .10 | .9000 | 1000 | 18000 | 81000 | .1009 | .8991 | 1019 | 18162 | 80919 | 1100 | 18000 | 81000 | -100 | 7.95  |
| 100000 | 1.11 | .10 | .9000 | 1000 | 18000 | 81000 | .1010 | .8990 | 1021 | 18178 | 80911 | 1110 | 18000 | 81000 | -110 | 9.60  |
| 100000 | 1.12 | .10 | .9000 | 1000 | 18000 | 81000 | .1011 | .8989 | 1023 | 18194 | 80903 | 1120 | 18000 | 81000 | -120 | 11.40 |
| 100000 | 1.13 | .10 | .9000 | 1000 | 18000 | 81000 | .1012 | .8988 | 1025 | 18210 | 80895 | 1130 | 18000 | 81000 | -130 | 13.36 |
| 100000 | 1.14 | .10 | .9000 | 1000 | 18000 | 81000 | .1013 | .8987 | 1027 | 18226 | 80887 | 1140 | 18000 | 81000 | -140 | 15.46 |
| 100000 | 1.15 | .10 | .9000 | 1000 | 18000 | 81000 | .1013 | .8987 | 1029 | 18243 | 80879 | 1150 | 18000 | 81000 | -150 | 17.72 |
| 100000 | 1.16 | .10 | .9000 | 1000 | 18000 | 81000 | .1014 | .8986 | 1031 | 18259 | 80871 | 1160 | 18000 | 81000 | -160 | 20.12 |
| 100000 | 1.17 | .10 | .9000 | 1000 | 18000 | 81000 | .1015 | .8985 | 1033 | 18275 | 80863 | 1170 | 18000 | 81000 | -170 | 22.67 |
| 100000 | 1.18 | .10 | .9000 | 1000 | 18000 | 81000 | .1016 | .8984 | 1034 | 18291 | 80854 | 1180 | 18000 | 81000 | -180 | 25.37 |
| 100000 | 1.19 | .10 | .9000 | 1000 | 18000 | 81000 | .1017 | .8983 | 1036 | 18307 | 80846 | 1190 | 18000 | 81000 | -190 | 28.21 |
| 100000 | 1.20 | .10 | .9000 | 1000 | 18000 | 81000 | .1018 | .8982 | 1038 | 18323 | 80838 | 1200 | 18000 | 81000 | -200 | 31.20 |
| 100000 | .80  | .15 | .8500 | 2250 | 25500 | 72250 | .1462 | .8538 | 2127 | 24847 | 72577 | 1800 | 25500 | 72250 | 450  | 68.80 |
| 100000 | .81  | .15 | .8500 | 2250 | 25500 | 72250 | .1464 | .8536 | 2133 | 24880 | 72560 | 1823 | 25500 | 72250 | 428  | 61.91 |
| 100000 | .82  | .15 | .8500 | 2250 | 25500 | 72250 | .1465 | .8535 | 2139 | 24912 | 72544 | 1845 | 25500 | 72250 | 405  | 55.41 |
| 100000 | .83  | .15 | .8500 | 2250 | 25500 | 72250 | .1467 | .8533 | 2145 | 24945 | 72527 | 1868 | 25500 | 72250 | 383  | 49.28 |
| 100000 | .84  | .15 | .8500 | 2250 | 25500 | 72250 | .1469 | .8531 | 2151 | 24978 | 72511 | 1890 | 25500 | 72250 | 360  | 43.53 |
| 100000 | .85  | .15 | .8500 | 2250 | 25500 | 72250 | .1471 | .8529 | 2157 | 25011 | 72495 | 1913 | 25500 | 72250 | 338  | 38.15 |
| 100000 | .86  | .15 | .8500 | 2250 | 25500 | 72250 | .1473 | .8527 | 2163 | 25043 | 72478 | 1935 | 25500 | 72250 | 315  | 33.14 |
| 100000 | .87  | .15 | .8500 | 2250 | 25500 | 72250 | .1475 | .8525 | 2169 | 25076 | 72462 | 1958 | 25500 | 72250 | 293  | 28.49 |
| 100000 | .88  | .15 | .8500 | 2250 | 25500 | 72250 | .1477 | .8523 | 2176 | 25109 | 72446 | 1980 | 25500 | 72250 | 270  | 24.21 |
| 100000 | .89  | .15 | .8500 | 2250 | 25500 | 72250 | .1479 | .8521 | 2182 | 25141 | 72429 | 2003 | 25500 | 72250 | 248  | 20.29 |
| 100000 | .90  | .15 | .8500 | 2250 | 25500 | 72250 | .1481 | .8519 | 2188 | 25174 | 72413 | 2025 | 25500 | 72250 | 225  | 16.72 |

|        |      |     |       |      |       |       |       |       |      |       |       |      |       |       |      |            |
|--------|------|-----|-------|------|-------|-------|-------|-------|------|-------|-------|------|-------|-------|------|------------|
| 100000 | .91  | .15 | .8500 | 2250 | 25500 | 72250 | .1483 | .8517 | 2194 | 25207 | 72397 | 2048 | 25500 | 72250 | 203  | 13.50      |
| 100000 | .92  | .15 | .8500 | 2250 | 25500 | 72250 | .1485 | .8515 | 2200 | 25239 | 72380 | 2070 | 25500 | 72250 | 180  | 10.64      |
| 100000 | .93  | .15 | .8500 | 2250 | 25500 | 72250 | .1487 | .8513 | 2206 | 25272 | 72364 | 2093 | 25500 | 72250 | 158  | 8.12       |
| 100000 | .94  | .15 | .8500 | 2250 | 25500 | 72250 | .1489 | .8511 | 2213 | 25305 | 72348 | 2115 | 25500 | 72250 | 135  | 5.95       |
| 100000 | .95  | .15 | .8500 | 2250 | 25500 | 72250 | .1490 | .8510 | 2219 | 25337 | 72331 | 2138 | 25500 | 72250 | 113  | 4.12       |
| 100000 | .96  | .15 | .8500 | 2250 | 25500 | 72250 | .1492 | .8508 | 2225 | 25370 | 72315 | 2160 | 25500 | 72250 | 90   | 2.63       |
| 100000 | .97  | .15 | .8500 | 2250 | 25500 | 72250 | .1494 | .8506 | 2231 | 25402 | 72299 | 2183 | 25500 | 72250 | 68   | 1.48       |
| 100000 | .98  | .15 | .8500 | 2250 | 25500 | 72250 | .1496 | .8504 | 2238 | 25435 | 72283 | 2205 | 25500 | 72250 | 45   | .65        |
| 100000 | .99  | .15 | .8500 | 2250 | 25500 | 72250 | .1498 | .8502 | 2244 | 25467 | 72266 | 2228 | 25500 | 72250 | 23   | .16        |
| 100000 | 1.00 | .15 | .8500 | 2250 | 25500 | 72250 | .1500 | .8500 | 2250 | 25500 | 72250 | 2250 | 25500 | 72250 | 0    | .00        |
| 100000 | 1.01 | .15 | .8500 | 2250 | 25500 | 72250 | .1502 | .8498 | 2256 | 25533 | 72234 | 2273 | 25500 | 72250 | -23  | .16        |
| 100000 | 1.02 | .15 | .8500 | 2250 | 25500 | 72250 | .1504 | .8496 | 2263 | 25565 | 72218 | 2295 | 25500 | 72250 | -45  | .65        |
| 100000 | 1.03 | .15 | .8500 | 2250 | 25500 | 72250 | .1506 | .8494 | 2269 | 25597 | 72201 | 2318 | 25500 | 72250 | -68  | 1.45       |
| 100000 | 1.04 | .15 | .8500 | 2250 | 25500 | 72250 | .1508 | .8492 | 2275 | 25630 | 72185 | 2340 | 25500 | 72250 | -90  | 2.57       |
| 100000 | 1.05 | .15 | .8500 | 2250 | 25500 | 72250 | .1510 | .8490 | 2281 | 25662 | 72169 | 2363 | 25500 | 72250 | -113 | 4.01       |
| 100000 | 1.06 | .15 | .8500 | 2250 | 25500 | 72250 | .1511 | .8489 | 2288 | 25695 | 72153 | 2385 | 25500 | 72250 | -135 | 5.76       |
| 100000 | 1.07 | .15 | .8500 | 2250 | 25500 | 72250 | .1513 | .8487 | 2294 | 25727 | 72136 | 2408 | 25500 | 72250 | -158 | 7.81       |
| 100000 | 1.08 | .15 | .8500 | 2250 | 25500 | 72250 | .1515 | .8485 | 2300 | 25760 | 72120 | 2430 | 25500 | 72250 | -180 | 10.18      |
| 100000 | 1.09 | .15 | .8500 | 2250 | 25500 | 72250 | .1517 | .8483 | 2306 | 25792 | 72104 | 2453 | 25500 | 72250 | -203 | 12.85      |
| 100000 | 1.10 | .15 | .8500 | 2250 | 25500 | 72250 | .1519 | .8481 | 2313 | 25824 | 72088 | 2475 | 25500 | 72250 | -225 | 15.81      |
| 100000 | 1.11 | .15 | .8500 | 2250 | 25500 | 72250 | .1521 | .8479 | 2319 | 25857 | 72072 | 2498 | 25500 | 72250 | -248 | 19.08      |
| 100000 | 1.12 | .15 | .8500 | 2250 | 25500 | 72250 | .1523 | .8477 | 2325 | 25889 | 72055 | 2520 | 25500 | 72250 | -270 | 22.65      |
| 100000 | 1.13 | .15 | .8500 | 2250 | 25500 | 72250 | .1525 | .8475 | 2332 | 25921 | 72039 | 2543 | 25500 | 72250 | -293 | 26.51      |
| 100000 | 1.14 | .15 | .8500 | 2250 | 25500 | 72250 | .1527 | .8473 | 2338 | 25954 | 72023 | 2565 | 25500 | 72250 | -315 | 30.66      |
| 100000 | 1.15 | .15 | .8500 | 2250 | 25500 | 72250 | .1529 | .8471 | 2344 | 25986 | 72007 | 2588 | 25500 | 72250 | -338 | 35.10      |
| 100000 | 1.16 | .15 | .8500 | 2250 | 25500 | 72250 | .1530 | .8470 | 2351 | 26018 | 71991 | 2610 | 25500 | 72250 | -360 | 39.83      |
| 100000 | 1.17 | .15 | .8500 | 2250 | 25500 | 72250 | .1532 | .8468 | 2357 | 26051 | 71975 | 2633 | 25500 | 72250 | -383 | 44.84      |
| 100000 | 1.18 | .15 | .8500 | 2250 | 25500 | 72250 | .1534 | .8466 | 2364 | 26083 | 71959 | 2655 | 25500 | 72250 | -405 | 50.14      |
| 100000 | 1.19 | .15 | .8500 | 2250 | 25500 | 72250 | .1536 | .8464 | 2370 | 26115 | 71942 | 2678 | 25500 | 72250 | -428 | 55.71      |
| 100000 | 1.20 | .15 | .8500 | 2250 | 25500 | 72250 | .1538 | .8462 | 2376 | 26147 | 71926 | 2700 | 25500 | 72250 | -450 | 61.57      |
| 100000 | .80  | .20 | .8000 | 4000 | 32000 | 64000 | .1935 | .8065 | 3716 | 30968 | 64516 | 3200 | 32000 | 64000 | 800  | 110.2<br>2 |
| 100000 | .81  | .20 | .8000 | 4000 | 32000 | 64000 | .1939 | .8061 | 3730 | 31020 | 64490 | 3240 | 32000 | 64000 | 760  | 99.10      |

|        |      |     |       |      |       |       |       |       |      |       |       |      |       |       |      |       |
|--------|------|-----|-------|------|-------|-------|-------|-------|------|-------|-------|------|-------|-------|------|-------|
| 100000 | .82  | .20 | .8000 | 4000 | 32000 | 64000 | .1942 | .8058 | 3744 | 31072 | 64464 | 3280 | 32000 | 64000 | 720  | 88.61 |
| 100000 | .83  | .20 | .8000 | 4000 | 32000 | 64000 | .1945 | .8055 | 3758 | 31124 | 64438 | 3320 | 32000 | 64000 | 680  | 78.74 |
| 100000 | .84  | .20 | .8000 | 4000 | 32000 | 64000 | .1948 | .8052 | 3772 | 31176 | 64412 | 3360 | 32000 | 64000 | 640  | 69.49 |
| 100000 | .85  | .20 | .8000 | 4000 | 32000 | 64000 | .1952 | .8048 | 3786 | 31227 | 64386 | 3400 | 32000 | 64000 | 600  | 60.85 |
| 100000 | .86  | .20 | .8000 | 4000 | 32000 | 64000 | .1955 | .8045 | 3800 | 31279 | 64360 | 3440 | 32000 | 64000 | 560  | 52.81 |
| 100000 | .87  | .20 | .8000 | 4000 | 32000 | 64000 | .1958 | .8042 | 3815 | 31331 | 64335 | 3480 | 32000 | 64000 | 520  | 45.37 |
| 100000 | .88  | .20 | .8000 | 4000 | 32000 | 64000 | .1961 | .8039 | 3829 | 31383 | 64309 | 3520 | 32000 | 64000 | 480  | 38.51 |
| 100000 | .89  | .20 | .8000 | 4000 | 32000 | 64000 | .1965 | .8035 | 3843 | 31434 | 64283 | 3560 | 32000 | 64000 | 440  | 32.24 |
| 100000 | .90  | .20 | .8000 | 4000 | 32000 | 64000 | .1968 | .8032 | 3857 | 31486 | 64257 | 3600 | 32000 | 64000 | 400  | 26.55 |
| 100000 | .91  | .20 | .8000 | 4000 | 32000 | 64000 | .1971 | .8029 | 3871 | 31538 | 64231 | 3640 | 32000 | 64000 | 360  | 21.43 |
| 100000 | .92  | .20 | .8000 | 4000 | 32000 | 64000 | .1974 | .8026 | 3885 | 31589 | 64205 | 3680 | 32000 | 64000 | 320  | 16.87 |
| 100000 | .93  | .20 | .8000 | 4000 | 32000 | 64000 | .1978 | .8022 | 3900 | 31641 | 64180 | 3720 | 32000 | 64000 | 280  | 12.87 |
| 100000 | .94  | .20 | .8000 | 4000 | 32000 | 64000 | .1981 | .8019 | 3914 | 31692 | 64154 | 3760 | 32000 | 64000 | 240  | 9.42  |
| 100000 | .95  | .20 | .8000 | 4000 | 32000 | 64000 | .1984 | .8016 | 3928 | 31743 | 64128 | 3800 | 32000 | 64000 | 200  | 6.52  |
| 100000 | .96  | .20 | .8000 | 4000 | 32000 | 64000 | .1987 | .8013 | 3943 | 31795 | 64103 | 3840 | 32000 | 64000 | 160  | 4.16  |
| 100000 | .97  | .20 | .8000 | 4000 | 32000 | 64000 | .1990 | .8010 | 3957 | 31846 | 64077 | 3880 | 32000 | 64000 | 120  | 2.33  |
| 100000 | .98  | .20 | .8000 | 4000 | 32000 | 64000 | .1994 | .8006 | 3971 | 31898 | 64051 | 3920 | 32000 | 64000 | 80   | 1.03  |
| 100000 | .99  | .20 | .8000 | 4000 | 32000 | 64000 | .1997 | .8003 | 3986 | 31949 | 64026 | 3960 | 32000 | 64000 | 40   | .26   |
| 100000 | 1.00 | .20 | .8000 | 4000 | 32000 | 64000 | .2000 | .8000 | 4000 | 32000 | 64000 | 4000 | 32000 | 64000 | 0    | .00   |
| 100000 | 1.01 | .20 | .8000 | 4000 | 32000 | 64000 | .2003 | .7997 | 4014 | 32051 | 63974 | 4040 | 32000 | 64000 | -40  | .26   |
| 100000 | 1.02 | .20 | .8000 | 4000 | 32000 | 64000 | .2006 | .7994 | 4029 | 32102 | 63949 | 4080 | 32000 | 64000 | -80  | 1.02  |
| 100000 | 1.03 | .20 | .8000 | 4000 | 32000 | 64000 | .2010 | .7990 | 4043 | 32153 | 63923 | 4120 | 32000 | 64000 | -120 | 2.28  |
| 100000 | 1.04 | .20 | .8000 | 4000 | 32000 | 64000 | .2013 | .7987 | 4058 | 32204 | 63898 | 4160 | 32000 | 64000 | -160 | 4.04  |
| 100000 | 1.05 | .20 | .8000 | 4000 | 32000 | 64000 | .2016 | .7984 | 4072 | 32255 | 63872 | 4200 | 32000 | 64000 | -200 | 6.29  |
| 100000 | 1.06 | .20 | .8000 | 4000 | 32000 | 64000 | .2019 | .7981 | 4087 | 32306 | 63847 | 4240 | 32000 | 64000 | -240 | 9.02  |
| 100000 | 1.07 | .20 | .8000 | 4000 | 32000 | 64000 | .2022 | .7978 | 4101 | 32357 | 63821 | 4280 | 32000 | 64000 | -280 | 12.23 |
| 100000 | 1.08 | .20 | .8000 | 4000 | 32000 | 64000 | .2026 | .7974 | 4116 | 32408 | 63796 | 4320 | 32000 | 64000 | -320 | 15.92 |
| 100000 | 1.09 | .20 | .8000 | 4000 | 32000 | 64000 | .2029 | .7971 | 4130 | 32459 | 63770 | 4360 | 32000 | 64000 | -360 | 20.08 |
| 100000 | 1.10 | .20 | .8000 | 4000 | 32000 | 64000 | .2032 | .7968 | 4145 | 32510 | 63745 | 4400 | 32000 | 64000 | -400 | 24.70 |
| 100000 | 1.11 | .20 | .8000 | 4000 | 32000 | 64000 | .2035 | .7965 | 4160 | 32561 | 63720 | 4440 | 32000 | 64000 | -440 | 29.79 |
| 100000 | 1.12 | .20 | .8000 | 4000 | 32000 | 64000 | .2038 | .7962 | 4174 | 32611 | 63694 | 4480 | 32000 | 64000 | -480 | 35.33 |
| 100000 | 1.13 | .20 | .8000 | 4000 | 32000 | 64000 | .2041 | .7959 | 4189 | 32662 | 63669 | 4520 | 32000 | 64000 | -520 | 41.31 |
| 100000 | 1.14 | .20 | .8000 | 4000 | 32000 | 64000 | .2045 | .7955 | 4204 | 32713 | 63644 | 4560 | 32000 | 64000 | -560 | 47.75 |

|        |      |     |       |      |       |       |       |       |      |       |       |      |       |       |      |        |
|--------|------|-----|-------|------|-------|-------|-------|-------|------|-------|-------|------|-------|-------|------|--------|
| 100000 | 1.15 | .20 | .8000 | 4000 | 32000 | 64000 | .2048 | .7952 | 4218 | 32763 | 63618 | 4600 | 32000 | 64000 | -600 | 54.62  |
| 100000 | 1.16 | .20 | .8000 | 4000 | 32000 | 64000 | .2051 | .7949 | 4233 | 32814 | 63593 | 4640 | 32000 | 64000 | -640 | 61.93  |
| 100000 | 1.17 | .20 | .8000 | 4000 | 32000 | 64000 | .2054 | .7946 | 4248 | 32865 | 63568 | 4680 | 32000 | 64000 | -680 | 69.67  |
| 100000 | 1.18 | .20 | .8000 | 4000 | 32000 | 64000 | .2057 | .7943 | 4262 | 32915 | 63542 | 4720 | 32000 | 64000 | -720 | 77.84  |
| 100000 | 1.19 | .20 | .8000 | 4000 | 32000 | 64000 | .2060 | .7940 | 4277 | 32965 | 63517 | 4760 | 32000 | 64000 | -760 | 86.43  |
| 100000 | 1.20 | .20 | .8000 | 4000 | 32000 | 64000 | .2063 | .7937 | 4292 | 33016 | 63492 | 4800 | 32000 | 64000 | -800 | 95.43  |
| 100000 | .80  | .25 | .7500 | 6250 | 37500 | 56250 | .2405 | .7595 | 5712 | 36076 | 56962 | 5000 | 37500 | 56250 | 1250 | 153.87 |
| 100000 | .81  | .25 | .7500 | 6250 | 37500 | 56250 | .2410 | .7590 | 5738 | 36148 | 56926 | 5063 | 37500 | 56250 | 1188 | 138.23 |
| 100000 | .82  | .25 | .7500 | 6250 | 37500 | 56250 | .2415 | .7585 | 5765 | 36220 | 56890 | 5125 | 37500 | 56250 | 1125 | 123.49 |
| 100000 | .83  | .25 | .7500 | 6250 | 37500 | 56250 | .2419 | .7581 | 5792 | 36292 | 56854 | 5188 | 37500 | 56250 | 1063 | 109.64 |
| 100000 | .84  | .25 | .7500 | 6250 | 37500 | 56250 | .2424 | .7576 | 5818 | 36364 | 56818 | 5250 | 37500 | 56250 | 1000 | 96.68  |
| 100000 | .85  | .25 | .7500 | 6250 | 37500 | 56250 | .2429 | .7571 | 5845 | 36435 | 56782 | 5313 | 37500 | 56250 | 938  | 84.58  |
| 100000 | .86  | .25 | .7500 | 6250 | 37500 | 56250 | .2434 | .7566 | 5872 | 36507 | 56747 | 5375 | 37500 | 56250 | 875  | 73.35  |
| 100000 | .87  | .25 | .7500 | 6250 | 37500 | 56250 | .2439 | .7561 | 5898 | 36578 | 56711 | 5438 | 37500 | 56250 | 813  | 62.96  |
| 100000 | .88  | .25 | .7500 | 6250 | 37500 | 56250 | .2443 | .7557 | 5925 | 36650 | 56675 | 5500 | 37500 | 56250 | 750  | 53.40  |
| 100000 | .89  | .25 | .7500 | 6250 | 37500 | 56250 | .2448 | .7552 | 5952 | 36721 | 56639 | 5563 | 37500 | 56250 | 688  | 44.67  |
| 100000 | .90  | .25 | .7500 | 6250 | 37500 | 56250 | .2453 | .7547 | 5979 | 36792 | 56604 | 5625 | 37500 | 56250 | 625  | 36.75  |
| 100000 | .91  | .25 | .7500 | 6250 | 37500 | 56250 | .2458 | .7542 | 6006 | 36864 | 56568 | 5688 | 37500 | 56250 | 563  | 29.63  |
| 100000 | .92  | .25 | .7500 | 6250 | 37500 | 56250 | .2462 | .7538 | 6033 | 36935 | 56533 | 5750 | 37500 | 56250 | 500  | 23.31  |
| 100000 | .93  | .25 | .7500 | 6250 | 37500 | 56250 | .2467 | .7533 | 6060 | 37006 | 56497 | 5813 | 37500 | 56250 | 438  | 17.77  |
| 100000 | .94  | .25 | .7500 | 6250 | 37500 | 56250 | .2472 | .7528 | 6087 | 37077 | 56462 | 5875 | 37500 | 56250 | 375  | 13.00  |
| 100000 | .95  | .25 | .7500 | 6250 | 37500 | 56250 | .2476 | .7524 | 6114 | 37147 | 56426 | 5938 | 37500 | 56250 | 313  | 8.98   |
| 100000 | .96  | .25 | .7500 | 6250 | 37500 | 56250 | .2481 | .7519 | 6141 | 37218 | 56391 | 6000 | 37500 | 56250 | 250  | 5.72   |
| 100000 | .97  | .25 | .7500 | 6250 | 37500 | 56250 | .2486 | .7514 | 6168 | 37289 | 56356 | 6063 | 37500 | 56250 | 188  | 3.21   |
| 100000 | .98  | .25 | .7500 | 6250 | 37500 | 56250 | .2491 | .7509 | 6195 | 37359 | 56320 | 6125 | 37500 | 56250 | 125  | 1.42   |
| 100000 | .99  | .25 | .7500 | 6250 | 37500 | 56250 | .2495 | .7505 | 6223 | 37430 | 56285 | 6188 | 37500 | 56250 | 63   | .35    |
| 100000 | 1.00 | .25 | .7500 | 6250 | 37500 | 56250 | .2500 | .7500 | 6250 | 37500 | 56250 | 6250 | 37500 | 56250 | 0    | .00    |
| 100000 | 1.01 | .25 | .7500 | 6250 | 37500 | 56250 | .2505 | .7495 | 6277 | 37570 | 56215 | 6313 | 37500 | 56250 | -63  | .35    |
| 100000 | 1.02 | .25 | .7500 | 6250 | 37500 | 56250 | .2509 | .7491 | 6305 | 37640 | 56180 | 6375 | 37500 | 56250 | -125 | 1.39   |

|        |      |     |       |      |       |       |       |       |      |       |       |      |       |       |       |        |
|--------|------|-----|-------|------|-------|-------|-------|-------|------|-------|-------|------|-------|-------|-------|--------|
| 100000 | 1.03 | .25 | .7500 | 6250 | 37500 | 56250 | .2514 | .7486 | 6332 | 37711 | 56145 | 6438 | 37500 | 56250 | -188  | 3.12   |
| 100000 | 1.04 | .25 | .7500 | 6250 | 37500 | 56250 | .2519 | .7481 | 6360 | 37781 | 56110 | 6500 | 37500 | 56250 | -250  | 5.53   |
| 100000 | 1.05 | .25 | .7500 | 6250 | 37500 | 56250 | .2523 | .7477 | 6387 | 37850 | 56075 | 6563 | 37500 | 56250 | -313  | 8.60   |
| 100000 | 1.06 | .25 | .7500 | 6250 | 37500 | 56250 | .2528 | .7472 | 6415 | 37920 | 56040 | 6625 | 37500 | 56250 | -375  | 12.33  |
| 100000 | 1.07 | .25 | .7500 | 6250 | 37500 | 56250 | .2533 | .7467 | 6442 | 37990 | 56005 | 6688 | 37500 | 56250 | -438  | 16.71  |
| 100000 | 1.08 | .25 | .7500 | 6250 | 37500 | 56250 | .2537 | .7463 | 6470 | 38060 | 55970 | 6750 | 37500 | 56250 | -500  | 21.73  |
| 100000 | 1.09 | .25 | .7500 | 6250 | 37500 | 56250 | .2542 | .7458 | 6498 | 38129 | 55935 | 6813 | 37500 | 56250 | -563  | 27.39  |
| 100000 | 1.10 | .25 | .7500 | 6250 | 37500 | 56250 | .2547 | .7453 | 6526 | 38199 | 55901 | 6875 | 37500 | 56250 | -625  | 33.67  |
| 100000 | 1.11 | .25 | .7500 | 6250 | 37500 | 56250 | .2551 | .7449 | 6553 | 38268 | 55866 | 6938 | 37500 | 56250 | -688  | 40.57  |
| 100000 | 1.12 | .25 | .7500 | 6250 | 37500 | 56250 | .2556 | .7444 | 6581 | 38337 | 55831 | 7000 | 37500 | 56250 | -750  | 48.08  |
| 100000 | 1.13 | .25 | .7500 | 6250 | 37500 | 56250 | .2560 | .7440 | 6609 | 38407 | 55797 | 7063 | 37500 | 56250 | -813  | 56.19  |
| 100000 | 1.14 | .25 | .7500 | 6250 | 37500 | 56250 | .2565 | .7435 | 6637 | 38476 | 55762 | 7125 | 37500 | 56250 | -875  | 64.89  |
| 100000 | 1.15 | .25 | .7500 | 6250 | 37500 | 56250 | .2570 | .7430 | 6665 | 38545 | 55728 | 7188 | 37500 | 56250 | -938  | 74.18  |
| 100000 | 1.16 | .25 | .7500 | 6250 | 37500 | 56250 | .2574 | .7426 | 6693 | 38614 | 55693 | 7250 | 37500 | 56250 | -1000 | 84.04  |
| 100000 | 1.17 | .25 | .7500 | 6250 | 37500 | 56250 | .2579 | .7421 | 6721 | 38683 | 55659 | 7313 | 37500 | 56250 | -1063 | 94.48  |
| 100000 | 1.18 | .25 | .7500 | 6250 | 37500 | 56250 | .2583 | .7417 | 6749 | 38752 | 55624 | 7375 | 37500 | 56250 | -1125 | 105.48 |
| 100000 | 1.19 | .25 | .7500 | 6250 | 37500 | 56250 | .2588 | .7412 | 6777 | 38820 | 55590 | 7438 | 37500 | 56250 | -1188 | 117.04 |
| 100000 | 1.20 | .25 | .7500 | 6250 | 37500 | 56250 | .2593 | .7407 | 6806 | 38889 | 55556 | 7500 | 37500 | 56250 | -1250 | 129.15 |
| 100000 | .80  | .30 | .7000 | 9000 | 42000 | 49000 | .2872 | .7128 | 8098 | 40204 | 49898 | 7200 | 42000 | 49000 | 1800  | 196.04 |
| 100000 | .81  | .30 | .7000 | 9000 | 42000 | 49000 | .2878 | .7122 | 8142 | 40295 | 49852 | 7290 | 42000 | 49000 | 1710  | 175.97 |
| 100000 | .82  | .30 | .7000 | 9000 | 42000 | 49000 | .2885 | .7115 | 8187 | 40386 | 49807 | 7380 | 42000 | 49000 | 1620  | 157.08 |
| 100000 | .83  | .30 | .7000 | 9000 | 42000 | 49000 | .2891 | .7109 | 8231 | 40477 | 49761 | 7470 | 42000 | 49000 | 1530  | 139.35 |
| 100000 | .84  | .30 | .7000 | 9000 | 42000 | 49000 | .2898 | .7102 | 8276 | 40568 | 49716 | 7560 | 42000 | 49000 | 1440  | 122.77 |
| 100000 | .85  | .30 | .7000 | 9000 | 42000 | 49000 | .2904 | .7096 | 8321 | 40659 | 49671 | 7650 | 42000 | 49000 | 1350  | 107.33 |



|        |      |     |       |      |       |       |       |       |      |       |       |       |       |       |       |        |
|--------|------|-----|-------|------|-------|-------|-------|-------|------|-------|-------|-------|-------|-------|-------|--------|
| 100000 | .86  | .30 | .7000 | 9000 | 42000 | 49000 | .2911 | .7089 | 8365 | 40749 | 49625 | 7740  | 42000 | 49000 | 1260  | 92.99  |
| 100000 | .87  | .30 | .7000 | 9000 | 42000 | 49000 | .2917 | .7083 | 8410 | 40840 | 49580 | 7830  | 42000 | 49000 | 1170  | 79.76  |
| 100000 | .88  | .30 | .7000 | 9000 | 42000 | 49000 | .2924 | .7076 | 8455 | 40930 | 49535 | 7920  | 42000 | 49000 | 1080  | 67.60  |
| 100000 | .89  | .30 | .7000 | 9000 | 42000 | 49000 | .2930 | .7070 | 8500 | 41020 | 49490 | 8010  | 42000 | 49000 | 990   | 56.50  |
| 100000 | .90  | .30 | .7000 | 9000 | 42000 | 49000 | .2936 | .7064 | 8545 | 41110 | 49445 | 8100  | 42000 | 49000 | 900   | 46.45  |
| 100000 | .91  | .30 | .7000 | 9000 | 42000 | 49000 | .2943 | .7057 | 8590 | 41200 | 49400 | 8190  | 42000 | 49000 | 810   | 37.43  |
| 100000 | .92  | .30 | .7000 | 9000 | 42000 | 49000 | .2949 | .7051 | 8635 | 41289 | 49355 | 8280  | 42000 | 49000 | 720   | 29.42  |
| 100000 | .93  | .30 | .7000 | 9000 | 42000 | 49000 | .2956 | .7044 | 8681 | 41379 | 49311 | 8370  | 42000 | 49000 | 630   | 22.40  |
| 100000 | .94  | .30 | .7000 | 9000 | 42000 | 49000 | .2962 | .7038 | 8726 | 41468 | 49266 | 8460  | 42000 | 49000 | 540   | 16.37  |
| 100000 | .95  | .30 | .7000 | 9000 | 42000 | 49000 | .2968 | .7032 | 8771 | 41557 | 49221 | 8550  | 42000 | 49000 | 450   | 11.31  |
| 100000 | .96  | .30 | .7000 | 9000 | 42000 | 49000 | .2975 | .7025 | 8817 | 41646 | 49177 | 8640  | 42000 | 49000 | 360   | 7.20   |
| 100000 | .97  | .30 | .7000 | 9000 | 42000 | 49000 | .2981 | .7019 | 8863 | 41735 | 49133 | 8730  | 42000 | 49000 | 270   | 4.03   |
| 100000 | .98  | .30 | .7000 | 9000 | 42000 | 49000 | .2987 | .7013 | 8908 | 41823 | 49088 | 8820  | 42000 | 49000 | 180   | 1.78   |
| 100000 | .99  | .30 | .7000 | 9000 | 42000 | 49000 | .2994 | .7006 | 8954 | 41912 | 49044 | 8910  | 42000 | 49000 | 90    | .44    |
| 100000 | 1.00 | .30 | .7000 | 9000 | 42000 | 49000 | .3000 | .7000 | 9000 | 42000 | 49000 | 9000  | 42000 | 49000 | 0     | .00    |
| 100000 | 1.01 | .30 | .7000 | 9000 | 42000 | 49000 | .3006 | .6994 | 9046 | 42088 | 48956 | 9090  | 42000 | 49000 | -90   | .44    |
| 100000 | 1.02 | .30 | .7000 | 9000 | 42000 | 49000 | .3013 | .6987 | 9092 | 42176 | 48912 | 9180  | 42000 | 49000 | -180  | 1.75   |
| 100000 | 1.03 | .30 | .7000 | 9000 | 42000 | 49000 | .3019 | .6981 | 9138 | 42264 | 48868 | 9270  | 42000 | 49000 | -270  | 3.91   |
| 100000 | 1.04 | .30 | .7000 | 9000 | 42000 | 49000 | .3025 | .6975 | 9184 | 42352 | 48824 | 9360  | 42000 | 49000 | -360  | 6.91   |
| 100000 | 1.05 | .30 | .7000 | 9000 | 42000 | 49000 | .3031 | .6969 | 9230 | 42439 | 48780 | 9450  | 42000 | 49000 | -450  | 10.75  |
| 100000 | 1.06 | .30 | .7000 | 9000 | 42000 | 49000 | .3038 | .6962 | 9277 | 42526 | 48737 | 9540  | 42000 | 49000 | -540  | 15.40  |
| 100000 | 1.07 | .30 | .7000 | 9000 | 42000 | 49000 | .3044 | .6956 | 9323 | 42614 | 48693 | 9630  | 42000 | 49000 | -630  | 20.86  |
| 100000 | 1.08 | .30 | .7000 | 9000 | 42000 | 49000 | .3050 | .6950 | 9370 | 42701 | 48650 | 9720  | 42000 | 49000 | -720  | 27.11  |
| 100000 | 1.09 | .30 | .7000 | 9000 | 42000 | 49000 | .3056 | .6944 | 9416 | 42787 | 48606 | 9810  | 42000 | 49000 | -810  | 34.14  |
| 100000 | 1.10 | .30 | .7000 | 9000 | 42000 | 49000 | .3062 | .6938 | 9463 | 42874 | 48563 | 9900  | 42000 | 49000 | -900  | 41.94  |
| 100000 | 1.11 | .30 | .7000 | 9000 | 42000 | 49000 | .3069 | .6931 | 9510 | 42961 | 48520 | 9990  | 42000 | 49000 | -990  | 50.50  |
| 100000 | 1.12 | .30 | .7000 | 9000 | 42000 | 49000 | .3075 | .6925 | 9556 | 43047 | 48476 | 10080 | 42000 | 49000 | -1080 | 59.81  |
| 100000 | 1.13 | .30 | .7000 | 9000 | 42000 | 49000 | .3081 | .6919 | 9603 | 43133 | 48433 | 10170 | 42000 | 49000 | -1170 | 69.85  |
| 100000 | 1.14 | .30 | .7000 | 9000 | 42000 | 49000 | .3087 | .6913 | 9650 | 43219 | 48390 | 10260 | 42000 | 49000 | -1260 | 80.61  |
| 100000 | 1.15 | .30 | .7000 | 9000 | 42000 | 49000 | .3093 | .6907 | 9697 | 43305 | 48347 | 10350 | 42000 | 49000 | -1350 | 92.09  |
| 100000 | 1.16 | .30 | .7000 | 9000 | 42000 | 49000 | .3099 | .6901 | 9744 | 43391 | 48304 | 10440 | 42000 | 49000 | -1440 | 104.27 |
| 100000 | 1.17 | .30 | .7000 | 9000 | 42000 | 49000 | .3105 | .6895 | 9792 | 43477 | 48262 | 10530 | 42000 | 49000 | -1530 | 117.1  |

|        |      |     |       |       |       |       |       |       |       |       |       |       |       |       |       |        |
|--------|------|-----|-------|-------|-------|-------|-------|-------|-------|-------|-------|-------|-------|-------|-------|--------|
|        |      |     |       |       |       |       |       |       |       |       |       |       |       |       |       | 5      |
| 100000 | 1.18 | .30 | .7000 | 9000  | 42000 | 49000 | .3112 | .6888 | 9839  | 43562 | 48219 | 10620 | 42000 | 49000 | -1620 | 130.70 |
| 100000 | 1.19 | .30 | .7000 | 9000  | 42000 | 49000 | .3118 | .6882 | 9886  | 43648 | 48176 | 10710 | 42000 | 49000 | -1710 | 144.93 |
| 100000 | 1.20 | .30 | .7000 | 9000  | 42000 | 49000 | .3124 | .6876 | 9934  | 43733 | 48134 | 10800 | 42000 | 49000 | -1800 | 159.82 |
| 100000 | .80  | .35 | .6500 | 12250 | 45500 | 42250 | .3337 | .6663 | 10861 | 43378 | 43311 | 9800  | 45500 | 42250 | 2450  | 233.50 |
| 100000 | .81  | .35 | .6500 | 12250 | 45500 | 42250 | .3345 | .6655 | 10929 | 43486 | 43257 | 9923  | 45500 | 42250 | 2328  | 209.42 |
| 100000 | .82  | .35 | .6500 | 12250 | 45500 | 42250 | .3353 | .6647 | 10998 | 43595 | 43203 | 10045 | 45500 | 42250 | 2205  | 186.79 |
| 100000 | .83  | .35 | .6500 | 12250 | 45500 | 42250 | .3362 | .6638 | 11066 | 43703 | 43149 | 10168 | 45500 | 42250 | 2083  | 165.58 |
| 100000 | .84  | .35 | .6500 | 12250 | 45500 | 42250 | .3370 | .6630 | 11135 | 43811 | 43095 | 10290 | 45500 | 42250 | 1960  | 145.77 |
| 100000 | .85  | .35 | .6500 | 12250 | 45500 | 42250 | .3378 | .6622 | 11203 | 43918 | 43041 | 10413 | 45500 | 42250 | 1838  | 127.33 |
| 100000 | .86  | .35 | .6500 | 12250 | 45500 | 42250 | .3387 | .6613 | 11272 | 44026 | 42987 | 10535 | 45500 | 42250 | 1715  | 110.24 |
| 100000 | .87  | .35 | .6500 | 12250 | 45500 | 42250 | .3395 | .6605 | 11341 | 44133 | 42934 | 10658 | 45500 | 42250 | 1593  | 94.48  |
| 100000 | .88  | .35 | .6500 | 12250 | 45500 | 42250 | .3403 | .6597 | 11410 | 44239 | 42880 | 10780 | 45500 | 42250 | 1470  | 80.01  |
| 100000 | .89  | .35 | .6500 | 12250 | 45500 | 42250 | .3411 | .6589 | 11480 | 44346 | 42827 | 10903 | 45500 | 42250 | 1348  | 66.83  |
| 100000 | .90  | .35 | .6500 | 12250 | 45500 | 42250 | .3419 | .6581 | 11549 | 44452 | 42774 | 11025 | 45500 | 42250 | 1225  | 54.90  |
| 100000 | .91  | .35 | .6500 | 12250 | 45500 | 42250 | .3428 | .6572 | 11618 | 44558 | 42721 | 11148 | 45500 | 42250 | 1103  | 44.20  |
| 100000 | .92  | .35 | .6500 | 12250 | 45500 | 42250 | .3436 | .6564 | 11688 | 44664 | 42668 | 11270 | 45500 | 42250 | 980   | 34.72  |
| 100000 | .93  | .35 | .6500 | 12250 | 45500 | 42250 | .3444 | .6556 | 11758 | 44769 | 42615 | 11393 | 45500 | 42250 | 858   | 26.42  |
| 100000 | .94  | .35 | .6500 | 12250 | 45500 | 42250 | .3452 | .6548 | 11828 | 44874 | 42563 | 11515 | 45500 | 42250 | 735   | 19.30  |
| 100000 | .95  | .35 | .6500 | 12250 | 45500 | 42250 | .3460 | .6540 | 11898 | 44979 | 42510 | 11638 | 45500 | 42250 | 613   | 13.32  |
| 100000 | .96  | .35 | .6500 | 12250 | 45500 | 42250 | .3468 | .6532 | 11968 | 45084 | 42458 | 11760 | 45500 | 42250 | 490   | 8.48   |
| 100000 | .97  | .35 | .6500 | 12250 | 45500 | 42250 | .3476 | .6524 | 12038 | 45188 | 42406 | 11883 | 45500 | 42250 | 368   | 4.74   |
| 100000 | .98  | .35 | .6500 | 12250 | 45500 | 42250 | .3484 | .6516 | 12109 | 45292 | 42354 | 12005 | 45500 | 42250 | 245   | 2.09   |
| 100000 | .99  | .35 | .6500 | 12250 | 45500 | 42250 | .3492 | .6508 | 12179 | 45396 | 42302 | 12128 | 45500 | 42250 | 123   | .52    |

|        |      |     |       |       |       |       |       |       |       |       |       |       |       |       |       |        |
|--------|------|-----|-------|-------|-------|-------|-------|-------|-------|-------|-------|-------|-------|-------|-------|--------|
| 100000 | 1.00 | .35 | .6500 | 12250 | 45500 | 42250 | .3500 | .6500 | 12250 | 45500 | 42250 | 12250 | 45500 | 42250 | 0     | .00    |
| 100000 | 1.01 | .35 | .6500 | 12250 | 45500 | 42250 | .3508 | .6492 | 12321 | 45603 | 42198 | 12373 | 45500 | 42250 | -123  | .51    |
| 100000 | 1.02 | .35 | .6500 | 12250 | 45500 | 42250 | .3516 | .6484 | 12392 | 45707 | 42147 | 12495 | 45500 | 42250 | -245  | 2.05   |
| 100000 | 1.03 | .35 | .6500 | 12250 | 45500 | 42250 | .3524 | .6476 | 12463 | 45809 | 42095 | 12618 | 45500 | 42250 | -368  | 4.58   |
| 100000 | 1.04 | .35 | .6500 | 12250 | 45500 | 42250 | .3532 | .6468 | 12534 | 45912 | 42044 | 12740 | 45500 | 42250 | -490  | 8.09   |
| 100000 | 1.05 | .35 | .6500 | 12250 | 45500 | 42250 | .3540 | .6460 | 12605 | 46014 | 41993 | 12863 | 45500 | 42250 | -613  | 12.57  |
| 100000 | 1.06 | .35 | .6500 | 12250 | 45500 | 42250 | .3547 | .6453 | 12677 | 46117 | 41942 | 12985 | 45500 | 42250 | -735  | 18.01  |
| 100000 | 1.07 | .35 | .6500 | 12250 | 45500 | 42250 | .3555 | .6445 | 12748 | 46218 | 41891 | 13108 | 45500 | 42250 | -858  | 24.37  |
| 100000 | 1.08 | .35 | .6500 | 12250 | 45500 | 42250 | .3563 | .6437 | 12820 | 46320 | 41840 | 13230 | 45500 | 42250 | -980  | 31.65  |
| 100000 | 1.09 | .35 | .6500 | 12250 | 45500 | 42250 | .3571 | .6429 | 12892 | 46421 | 41789 | 13353 | 45500 | 42250 | -1103 | 39.84  |
| 100000 | 1.10 | .35 | .6500 | 12250 | 45500 | 42250 | .3579 | .6421 | 12964 | 46523 | 41739 | 13475 | 45500 | 42250 | -1225 | 48.91  |
| 100000 | 1.11 | .35 | .6500 | 12250 | 45500 | 42250 | .3586 | .6414 | 13036 | 46623 | 41688 | 13598 | 45500 | 42250 | -1348 | 58.85  |
| 100000 | 1.12 | .35 | .6500 | 12250 | 45500 | 42250 | .3594 | .6406 | 13108 | 46724 | 41638 | 13720 | 45500 | 42250 | -1470 | 69.65  |
| 100000 | 1.13 | .35 | .6500 | 12250 | 45500 | 42250 | .3602 | .6398 | 13180 | 46825 | 41588 | 13843 | 45500 | 42250 | -1593 | 81.29  |
| 100000 | 1.14 | .35 | .6500 | 12250 | 45500 | 42250 | .3610 | .6390 | 13253 | 46925 | 41538 | 13965 | 45500 | 42250 | -1715 | 93.77  |
| 100000 | 1.15 | .35 | .6500 | 12250 | 45500 | 42250 | .3617 | .6383 | 13325 | 47025 | 41488 | 14088 | 45500 | 42250 | -1838 | 107.06 |
| 100000 | 1.16 | .35 | .6500 | 12250 | 45500 | 42250 | .3625 | .6375 | 13398 | 47124 | 41438 | 14210 | 45500 | 42250 | -1960 | 121.14 |
| 100000 | 1.17 | .35 | .6500 | 12250 | 45500 | 42250 | .3633 | .6367 | 13471 | 47224 | 41388 | 14333 | 45500 | 42250 | -2083 | 136.02 |
| 100000 | 1.18 | .35 | .6500 | 12250 | 45500 | 42250 | .3640 | .6360 | 13543 | 47323 | 41338 | 14455 | 45500 | 42250 | -2205 | 151.67 |
| 100000 | 1.19 | .35 | .6500 | 12250 | 45500 | 42250 | .3648 | .6352 | 13616 | 47422 | 41289 | 14578 | 45500 | 42250 | -2328 | 168.09 |
| 100000 | 1.20 | .35 | .6500 | 12250 | 45500 | 42250 | .3655 | .6345 | 13690 | 47521 | 41240 | 14700 | 45500 | 42250 | -2450 | 185.25 |
| 100000 | .80  | .40 | .6000 | 16000 | 48000 | 36000 | .3802 | .6198 | 13990 | 45620 | 37190 | 12800 | 48000 | 36000 | 3200  | 263.50 |
| 100000 | .81  | .40 | .6000 | 16000 | 48000 | 36000 | .3812 | .6188 | 14089 | 45743 | 37129 | 12960 | 48000 | 36000 | 3040  | 236.14 |
| 100000 | .82  | .40 | .6000 | 16000 | 48000 | 36000 | .3822 | .6178 | 14188 | 45865 | 37068 | 13120 | 48000 | 36000 | 2880  | 210.47 |

|        |      |     |       |       |       |       |       |       |       |       |       |       |       |       |       |        |
|--------|------|-----|-------|-------|-------|-------|-------|-------|-------|-------|-------|-------|-------|-------|-------|--------|
| 100000 | .83  | .40 | .6000 | 16000 | 48000 | 36000 | .3832 | .6168 | 14287 | 45987 | 37007 | 13280 | 48000 | 36000 | 2720  | 186.43 |
| 100000 | .84  | .40 | .6000 | 16000 | 48000 | 36000 | .3842 | .6158 | 14386 | 46108 | 36946 | 13440 | 48000 | 36000 | 2560  | 164.00 |
| 100000 | .85  | .40 | .6000 | 16000 | 48000 | 36000 | .3852 | .6148 | 14485 | 46230 | 36885 | 13600 | 48000 | 36000 | 2400  | 143.15 |
| 100000 | .86  | .40 | .6000 | 16000 | 48000 | 36000 | .3863 | .6137 | 14585 | 46350 | 36825 | 13760 | 48000 | 36000 | 2240  | 123.85 |
| 100000 | .87  | .40 | .6000 | 16000 | 48000 | 36000 | .3873 | .6127 | 14685 | 46471 | 36765 | 13920 | 48000 | 36000 | 2080  | 106.06 |
| 100000 | .88  | .40 | .6000 | 16000 | 48000 | 36000 | .3883 | .6117 | 14785 | 46591 | 36705 | 14080 | 48000 | 36000 | 1920  | 89.76  |
| 100000 | .89  | .40 | .6000 | 16000 | 48000 | 36000 | .3893 | .6107 | 14885 | 46710 | 36645 | 14240 | 48000 | 36000 | 1760  | 74.92  |
| 100000 | .90  | .40 | .6000 | 16000 | 48000 | 36000 | .3902 | .6098 | 14985 | 46829 | 36585 | 14400 | 48000 | 36000 | 1600  | 61.50  |
| 100000 | .91  | .40 | .6000 | 16000 | 48000 | 36000 | .3912 | .6088 | 15086 | 46948 | 36526 | 14560 | 48000 | 36000 | 1440  | 49.48  |
| 100000 | .92  | .40 | .6000 | 16000 | 48000 | 36000 | .3922 | .6078 | 15187 | 47066 | 36467 | 14720 | 48000 | 36000 | 1280  | 38.84  |
| 100000 | .93  | .40 | .6000 | 16000 | 48000 | 36000 | .3932 | .6068 | 15288 | 47184 | 36408 | 14880 | 48000 | 36000 | 1120  | 29.54  |
| 100000 | .94  | .40 | .6000 | 16000 | 48000 | 36000 | .3942 | .6058 | 15389 | 47302 | 36349 | 15040 | 48000 | 36000 | 960   | 21.56  |
| 100000 | .95  | .40 | .6000 | 16000 | 48000 | 36000 | .3952 | .6048 | 15490 | 47419 | 36290 | 15200 | 48000 | 36000 | 800   | 14.87  |
| 100000 | .96  | .40 | .6000 | 16000 | 48000 | 36000 | .3961 | .6039 | 15592 | 47536 | 36232 | 15360 | 48000 | 36000 | 640   | 9.46   |
| 100000 | .97  | .40 | .6000 | 16000 | 48000 | 36000 | .3971 | .6029 | 15694 | 47653 | 36174 | 15520 | 48000 | 36000 | 480   | 5.29   |
| 100000 | .98  | .40 | .6000 | 16000 | 48000 | 36000 | .3981 | .6019 | 15796 | 47769 | 36116 | 15680 | 48000 | 36000 | 320   | 2.33   |
| 100000 | .99  | .40 | .6000 | 16000 | 48000 | 36000 | .3990 | .6010 | 15898 | 47885 | 36058 | 15840 | 48000 | 36000 | 160   | .58    |
| 100000 | 1.00 | .40 | .6000 | 16000 | 48000 | 36000 | .4000 | .6000 | 16000 | 48000 | 36000 | 16000 | 48000 | 36000 | 0     | .00    |
| 100000 | 1.01 | .40 | .6000 | 16000 | 48000 | 36000 | .4010 | .5990 | 16102 | 48115 | 35942 | 16160 | 48000 | 36000 | -160  | .57    |
| 100000 | 1.02 | .40 | .6000 | 16000 | 48000 | 36000 | .4019 | .5981 | 16205 | 48230 | 35885 | 16320 | 48000 | 36000 | -320  | 2.27   |
| 100000 | 1.03 | .40 | .6000 | 16000 | 48000 | 36000 | .4029 | .5971 | 16308 | 48344 | 35828 | 16480 | 48000 | 36000 | -480  | 5.09   |
| 100000 | 1.04 | .40 | .6000 | 16000 | 48000 | 36000 | .4038 | .5962 | 16411 | 48458 | 35771 | 16640 | 48000 | 36000 | -640  | 8.99   |
| 100000 | 1.05 | .40 | .6000 | 16000 | 48000 | 36000 | .4048 | .5952 | 16514 | 48571 | 35714 | 16800 | 48000 | 36000 | -800  | 13.95  |
| 100000 | 1.06 | .40 | .6000 | 16000 | 48000 | 36000 | .4057 | .5943 | 16618 | 48685 | 35658 | 16960 | 48000 | 36000 | -960  | 19.97  |
| 100000 | 1.07 | .40 | .6000 | 16000 | 48000 | 36000 | .4066 | .5934 | 16721 | 48797 | 35601 | 17120 | 48000 | 36000 | -1120 | 27.01  |
| 100000 | 1.08 | .40 | .6000 | 16000 | 48000 | 36000 | .4076 | .5924 | 16825 | 48910 | 35545 | 17280 | 48000 | 36000 | -1280 | 35.06  |
| 100000 | 1.09 | .40 | .6000 | 16000 | 48000 | 36000 | .4085 | .5915 | 16929 | 49022 | 35489 | 17440 | 48000 | 36000 | -1440 | 44.10  |
| 100000 | 1.10 | .40 | .6000 | 16000 | 48000 | 36000 | .4094 | .5906 | 17033 | 49134 | 35433 | 17600 | 48000 | 36000 | -1600 | 54.11  |

|        |      |     |       |       |       |       |       |       |       |       |       |       |       |       |       |        |
|--------|------|-----|-------|-------|-------|-------|-------|-------|-------|-------|-------|-------|-------|-------|-------|--------|
| 100000 | 1.11 | .40 | .6000 | 16000 | 48000 | 36000 | .4104 | .5896 | 17137 | 49245 | 35377 | 17760 | 48000 | 36000 | -1760 | 65.07  |
| 100000 | 1.12 | .40 | .6000 | 16000 | 48000 | 36000 | .4113 | .5887 | 17242 | 49356 | 35322 | 17920 | 48000 | 36000 | -1920 | 76.97  |
| 100000 | 1.13 | .40 | .6000 | 16000 | 48000 | 36000 | .4122 | .5878 | 17346 | 49467 | 35266 | 18080 | 48000 | 36000 | -2080 | 89.79  |
| 100000 | 1.14 | .40 | .6000 | 16000 | 48000 | 36000 | .4131 | .5869 | 17451 | 49577 | 35211 | 18240 | 48000 | 36000 | -2240 | 103.51 |
| 100000 | 1.15 | .40 | .6000 | 16000 | 48000 | 36000 | .4141 | .5859 | 17556 | 49688 | 35156 | 18400 | 48000 | 36000 | -2400 | 118.11 |
| 100000 | 1.16 | .40 | .6000 | 16000 | 48000 | 36000 | .4150 | .5850 | 17661 | 49797 | 35101 | 18560 | 48000 | 36000 | -2560 | 133.58 |
| 100000 | 1.17 | .40 | .6000 | 16000 | 48000 | 36000 | .4159 | .5841 | 17767 | 49907 | 35047 | 18720 | 48000 | 36000 | -2720 | 149.91 |
| 100000 | 1.18 | .40 | .6000 | 16000 | 48000 | 36000 | .4168 | .5832 | 17872 | 50016 | 34992 | 18880 | 48000 | 36000 | -2880 | 167.07 |
| 100000 | 1.19 | .40 | .6000 | 16000 | 48000 | 36000 | .4177 | .5823 | 17978 | 50124 | 34938 | 19040 | 48000 | 36000 | -3040 | 185.06 |
| 100000 | 1.20 | .40 | .6000 | 16000 | 48000 | 36000 | .4186 | .5814 | 18084 | 50233 | 34884 | 19200 | 48000 | 36000 | -3200 | 203.85 |
| 100000 | .80  | .45 | .5500 | 20250 | 49500 | 30250 | .4268 | .5732 | 17477 | 46946 | 31527 | 16200 | 49500 | 30250 | 4050  | 283.90 |
| 100000 | .81  | .45 | .5500 | 20250 | 49500 | 30250 | .4280 | .5720 | 17613 | 47079 | 31460 | 16403 | 49500 | 30250 | 3848  | 254.24 |
| 100000 | .82  | .45 | .5500 | 20250 | 49500 | 30250 | .4292 | .5708 | 17749 | 47211 | 31394 | 16605 | 49500 | 30250 | 3645  | 226.43 |
| 100000 | .83  | .45 | .5500 | 20250 | 49500 | 30250 | .4304 | .5696 | 17886 | 47343 | 31328 | 16808 | 49500 | 30250 | 3443  | 200.43 |
| 100000 | .84  | .45 | .5500 | 20250 | 49500 | 30250 | .4316 | .5684 | 18023 | 47474 | 31263 | 17010 | 49500 | 30250 | 3240  | 176.19 |
| 100000 | .85  | .45 | .5500 | 20250 | 49500 | 30250 | .4328 | .5672 | 18160 | 47605 | 31198 | 17213 | 49500 | 30250 | 3038  | 153.69 |
| 100000 | .86  | .45 | .5500 | 20250 | 49500 | 30250 | .4340 | .5660 | 18298 | 47735 | 31133 | 17415 | 49500 | 30250 | 2835  | 132.87 |
| 100000 | .87  | .45 | .5500 | 20250 | 49500 | 30250 | .4351 | .5649 | 18435 | 47864 | 31068 | 17618 | 49500 | 30250 | 2633  | 113.71 |
| 100000 | .88  | .45 | .5500 | 20250 | 49500 | 30250 | .4363 | .5637 | 18573 | 47993 | 31003 | 17820 | 49500 | 30250 | 2430  | 96.17  |

|        |      |     |       |       |       |       |       |       |       |       |       |       |       |       |       |        |
|--------|------|-----|-------|-------|-------|-------|-------|-------|-------|-------|-------|-------|-------|-------|-------|--------|
| 100000 | .89  | .45 | .5500 | 20250 | 49500 | 30250 | .4375 | .5625 | 18712 | 48122 | 30939 | 18023 | 49500 | 30250 | 2228  | 80.21  |
| 100000 | .90  | .45 | .5500 | 20250 | 49500 | 30250 | .4386 | .5614 | 18850 | 48250 | 30875 | 18225 | 49500 | 30250 | 2025  | 65.81  |
| 100000 | .91  | .45 | .5500 | 20250 | 49500 | 30250 | .4398 | .5602 | 18989 | 48377 | 30812 | 18428 | 49500 | 30250 | 1823  | 52.91  |
| 100000 | .92  | .45 | .5500 | 20250 | 49500 | 30250 | .4409 | .5591 | 19128 | 48504 | 30748 | 18630 | 49500 | 30250 | 1620  | 41.50  |
| 100000 | .93  | .45 | .5500 | 20250 | 49500 | 30250 | .4421 | .5579 | 19267 | 48630 | 30685 | 18833 | 49500 | 30250 | 1418  | 31.55  |
| 100000 | .94  | .45 | .5500 | 20250 | 49500 | 30250 | .4432 | .5568 | 19407 | 48756 | 30622 | 19035 | 49500 | 30250 | 1215  | 23.01  |
| 100000 | .95  | .45 | .5500 | 20250 | 49500 | 30250 | .4444 | .5556 | 19547 | 48881 | 30559 | 19238 | 49500 | 30250 | 1013  | 15.86  |
| 100000 | .96  | .45 | .5500 | 20250 | 49500 | 30250 | .4455 | .5545 | 19687 | 49006 | 30497 | 19440 | 49500 | 30250 | 810   | 10.08  |
| 100000 | .97  | .45 | .5500 | 20250 | 49500 | 30250 | .4466 | .5534 | 19827 | 49130 | 30435 | 19643 | 49500 | 30250 | 608   | 5.63   |
| 100000 | .98  | .45 | .5500 | 20250 | 49500 | 30250 | .4478 | .5522 | 19968 | 49254 | 30373 | 19845 | 49500 | 30250 | 405   | 2.48   |
| 100000 | .99  | .45 | .5500 | 20250 | 49500 | 30250 | .4489 | .5511 | 20109 | 49377 | 30311 | 20048 | 49500 | 30250 | 203   | .62    |
| 100000 | 1.00 | .45 | .5500 | 20250 | 49500 | 30250 | .4500 | .5500 | 20250 | 49500 | 30250 | 20250 | 49500 | 30250 | 0     | .00    |
| 100000 | 1.01 | .45 | .5500 | 20250 | 49500 | 30250 | .4511 | .5489 | 20391 | 49622 | 30189 | 20453 | 49500 | 30250 | -203  | .61    |
| 100000 | 1.02 | .45 | .5500 | 20250 | 49500 | 30250 | .4522 | .5478 | 20533 | 49744 | 30128 | 20655 | 49500 | 30250 | -405  | 2.42   |
| 100000 | 1.03 | .45 | .5500 | 20250 | 49500 | 30250 | .4533 | .5467 | 20675 | 49865 | 30067 | 20858 | 49500 | 30250 | -608  | 5.40   |
| 100000 | 1.04 | .45 | .5500 | 20250 | 49500 | 30250 | .4544 | .5456 | 20817 | 49986 | 30007 | 21060 | 49500 | 30250 | -810  | 9.53   |
| 100000 | 1.05 | .45 | .5500 | 20250 | 49500 | 30250 | .4555 | .5445 | 20959 | 50106 | 29947 | 21263 | 49500 | 30250 | -1013 | 14.80  |
| 100000 | 1.06 | .45 | .5500 | 20250 | 49500 | 30250 | .4566 | .5434 | 21102 | 50226 | 29887 | 21465 | 49500 | 30250 | -1215 | 21.16  |
| 100000 | 1.07 | .45 | .5500 | 20250 | 49500 | 30250 | .4577 | .5423 | 21245 | 50346 | 29827 | 21668 | 49500 | 30250 | -1418 | 28.61  |
| 100000 | 1.08 | .45 | .5500 | 20250 | 49500 | 30250 | .4588 | .5412 | 21388 | 50464 | 29768 | 21870 | 49500 | 30250 | -1620 | 37.12  |
| 100000 | 1.09 | .45 | .5500 | 20250 | 49500 | 30250 | .4598 | .5402 | 21531 | 50583 | 29709 | 22073 | 49500 | 30250 | -1823 | 46.67  |
| 100000 | 1.10 | .45 | .5500 | 20250 | 49500 | 30250 | .4609 | .5391 | 21675 | 50701 | 29650 | 22275 | 49500 | 30250 | -2025 | 57.23  |
| 100000 | 1.11 | .45 | .5500 | 20250 | 49500 | 30250 | .4620 | .5380 | 21818 | 50818 | 29591 | 22478 | 49500 | 30250 | -2228 | 68.79  |
| 100000 | 1.12 | .45 | .5500 | 20250 | 49500 | 30250 | .4630 | .5370 | 21962 | 50935 | 29532 | 22680 | 49500 | 30250 | -2430 | 81.33  |
| 100000 | 1.13 | .45 | .5500 | 20250 | 49500 | 30250 | .4641 | .5359 | 22107 | 51052 | 29474 | 22883 | 49500 | 30250 | -2633 | 94.83  |
| 100000 | 1.14 | .45 | .5500 | 20250 | 49500 | 30250 | .4652 | .5348 | 22251 | 51168 | 29416 | 23085 | 49500 | 30250 | -2835 | 109.26 |
| 100000 | 1.15 | .45 | .5500 | 20250 | 49500 | 30250 | .4662 | .5338 | 22396 | 51284 | 29358 | 23288 | 49500 | 30250 | -3038 | 124.62 |
| 100000 | 1.16 | .45 | .5500 | 20250 | 49500 | 30250 | .4673 | .5327 | 22541 | 51399 | 29301 | 23490 | 49500 | 30250 | -3240 | 140.88 |
| 100000 | 1.17 | .45 | .5500 | 20250 | 49500 | 30250 | .4683 | .5317 | 22686 | 51513 | 29243 | 23693 | 49500 | 30250 | -3443 | 158.02 |

|        |      |     |       |       |       |       |       |       |       |       |       |       |       |       |       |        |
|--------|------|-----|-------|-------|-------|-------|-------|-------|-------|-------|-------|-------|-------|-------|-------|--------|
| 100000 | 1.18 | .45 | .5500 | 20250 | 49500 | 30250 | .4693 | .5307 | 22831 | 51628 | 29186 | 23895 | 49500 | 30250 | -3645 | 176.03 |
| 100000 | 1.19 | .45 | .5500 | 20250 | 49500 | 30250 | .4704 | .5296 | 22977 | 51741 | 29129 | 24098 | 49500 | 30250 | -3848 | 194.89 |
| 100000 | 1.20 | .45 | .5500 | 20250 | 49500 | 30250 | .4714 | .5286 | 23123 | 51855 | 29073 | 24300 | 49500 | 30250 | -4050 | 214.59 |
| 100000 | .80  | .50 | .5000 | 25000 | 50000 | 25000 | .4737 | .5263 | 21316 | 47368 | 26316 | 20000 | 50000 | 25000 | 5000  | 293.21 |
| 100000 | .81  | .50 | .5000 | 25000 | 50000 | 25000 | .4751 | .5249 | 21497 | 47507 | 26247 | 20250 | 50000 | 25000 | 4750  | 262.39 |
| 100000 | .82  | .50 | .5000 | 25000 | 50000 | 25000 | .4764 | .5236 | 21678 | 47644 | 26178 | 20500 | 50000 | 25000 | 4500  | 233.53 |
| 100000 | .83  | .50 | .5000 | 25000 | 50000 | 25000 | .4778 | .5222 | 21860 | 47781 | 26110 | 20750 | 50000 | 25000 | 4250  | 206.57 |
| 100000 | .84  | .50 | .5000 | 25000 | 50000 | 25000 | .4792 | .5208 | 22042 | 47917 | 26042 | 21000 | 50000 | 25000 | 4000  | 181.47 |
| 100000 | .85  | .50 | .5000 | 25000 | 50000 | 25000 | .4805 | .5195 | 22224 | 48052 | 25974 | 21250 | 50000 | 25000 | 3750  | 158.19 |
| 100000 | .86  | .50 | .5000 | 25000 | 50000 | 25000 | .4819 | .5181 | 22407 | 48187 | 25907 | 21500 | 50000 | 25000 | 3500  | 136.68 |
| 100000 | .87  | .50 | .5000 | 25000 | 50000 | 25000 | .4832 | .5168 | 22590 | 48320 | 25840 | 21750 | 50000 | 25000 | 3250  | 116.89 |
| 100000 | .88  | .50 | .5000 | 25000 | 50000 | 25000 | .4845 | .5155 | 22773 | 48454 | 25773 | 22000 | 50000 | 25000 | 3000  | 98.80  |
| 100000 | .89  | .50 | .5000 | 25000 | 50000 | 25000 | .4859 | .5141 | 22957 | 48586 | 25707 | 22250 | 50000 | 25000 | 2750  | 82.36  |
| 100000 | .90  | .50 | .5000 | 25000 | 50000 | 25000 | .4872 | .5128 | 23141 | 48718 | 25641 | 22500 | 50000 | 25000 | 2500  | 67.52  |
| 100000 | .91  | .50 | .5000 | 25000 | 50000 | 25000 | .4885 | .5115 | 23325 | 48849 | 25575 | 22750 | 50000 | 25000 | 2250  | 54.26  |
| 100000 | .92  | .50 | .5000 | 25000 | 50000 | 25000 | .4898 | .5102 | 23510 | 48980 | 25510 | 23000 | 50000 | 25000 | 2000  | 42.53  |
| 100000 | .93  | .50 | .5000 | 25000 | 50000 | 25000 | .4911 | .5089 | 23695 | 49109 | 25445 | 23250 | 50000 | 25000 | 1750  | 32.31  |
| 100000 | .94  | .50 | .5000 | 25000 | 50000 | 25000 | .4924 | .5076 | 23881 | 49239 | 25381 | 23500 | 50000 | 25000 | 1500  | 23.55  |
| 100000 | .95  | .50 | .5000 | 25000 | 50000 | 25000 | .4937 | .5063 | 24066 | 49367 | 25316 | 23750 | 50000 | 25000 | 1250  | 16.23  |
| 100000 | .96  | .50 | .5000 | 25000 | 50000 | 25000 | .4949 | .5051 | 24253 | 49495 | 25253 | 24000 | 50000 | 25000 | 1000  | 10.31  |
| 100000 | .97  | .50 | .5000 | 25000 | 50000 | 25000 | .4962 | .5038 | 24439 | 49622 | 25189 | 24250 | 50000 | 25000 | 750   | 5.75   |
| 100000 | .98  | .50 | .5000 | 25000 | 50000 | 25000 | .4975 | .5025 | 24626 | 49749 | 25126 | 24500 | 50000 | 25000 | 500   | 2.54   |
| 100000 | .99  | .50 | .5000 | 25000 | 50000 | 25000 | .4987 | .5013 | 24813 | 49875 | 25063 | 24750 | 50000 | 25000 | 250   | .63    |

|        |      |     |       |       |       |       |       |       |       |       |       |       |       |       |       |        |
|--------|------|-----|-------|-------|-------|-------|-------|-------|-------|-------|-------|-------|-------|-------|-------|--------|
| 100000 | 1.00 | .50 | .5000 | 25000 | 50000 | 25000 | .5000 | .5000 | 25000 | 50000 | 25000 | 25000 | 50000 | 25000 | 0     | .00    |
| 100000 | 1.01 | .50 | .5000 | 25000 | 50000 | 25000 | .5012 | .4988 | 25188 | 50125 | 24938 | 25250 | 50000 | 25000 | -250  | .62    |
| 100000 | 1.02 | .50 | .5000 | 25000 | 50000 | 25000 | .5025 | .4975 | 25376 | 50249 | 24876 | 25500 | 50000 | 25000 | -500  | 2.46   |
| 100000 | 1.03 | .50 | .5000 | 25000 | 50000 | 25000 | .5037 | .4963 | 25564 | 50372 | 24814 | 25750 | 50000 | 25000 | -750  | 5.50   |
| 100000 | 1.04 | .50 | .5000 | 25000 | 50000 | 25000 | .5050 | .4950 | 25752 | 50495 | 24752 | 26000 | 50000 | 25000 | -1000 | 9.71   |
| 100000 | 1.05 | .50 | .5000 | 25000 | 50000 | 25000 | .5062 | .4938 | 25941 | 50617 | 24691 | 26250 | 50000 | 25000 | -1250 | 15.06  |
| 100000 | 1.06 | .50 | .5000 | 25000 | 50000 | 25000 | .5074 | .4926 | 26131 | 50739 | 24631 | 26500 | 50000 | 25000 | -1500 | 21.53  |
| 100000 | 1.07 | .50 | .5000 | 25000 | 50000 | 25000 | .5086 | .4914 | 26320 | 50860 | 24570 | 26750 | 50000 | 25000 | -1750 | 29.09  |
| 100000 | 1.08 | .50 | .5000 | 25000 | 50000 | 25000 | .5098 | .4902 | 26510 | 50980 | 24510 | 27000 | 50000 | 25000 | -2000 | 37.72  |
| 100000 | 1.09 | .50 | .5000 | 25000 | 50000 | 25000 | .5110 | .4890 | 26700 | 51100 | 24450 | 27250 | 50000 | 25000 | -2250 | 47.40  |
| 100000 | 1.10 | .50 | .5000 | 25000 | 50000 | 25000 | .5122 | .4878 | 26890 | 51220 | 24390 | 27500 | 50000 | 25000 | -2500 | 58.11  |
| 100000 | 1.11 | .50 | .5000 | 25000 | 50000 | 25000 | .5134 | .4866 | 27081 | 51338 | 24331 | 27750 | 50000 | 25000 | -2750 | 69.81  |
| 100000 | 1.12 | .50 | .5000 | 25000 | 50000 | 25000 | .5146 | .4854 | 27272 | 51456 | 24272 | 28000 | 50000 | 25000 | -3000 | 82.50  |
| 100000 | 1.13 | .50 | .5000 | 25000 | 50000 | 25000 | .5157 | .4843 | 27463 | 51574 | 24213 | 28250 | 50000 | 25000 | -3250 | 96.15  |
| 100000 | 1.14 | .50 | .5000 | 25000 | 50000 | 25000 | .5169 | .4831 | 27655 | 51691 | 24155 | 28500 | 50000 | 25000 | -3500 | 110.74 |
| 100000 | 1.15 | .50 | .5000 | 25000 | 50000 | 25000 | .5181 | .4819 | 27846 | 51807 | 24096 | 28750 | 50000 | 25000 | -3750 | 126.25 |
| 100000 | 1.16 | .50 | .5000 | 25000 | 50000 | 25000 | .5192 | .4808 | 28038 | 51923 | 24038 | 29000 | 50000 | 25000 | -4000 | 142.66 |
| 100000 | 1.17 | .50 | .5000 | 25000 | 50000 | 25000 | .5204 | .4796 | 28231 | 52038 | 23981 | 29250 | 50000 | 25000 | -4250 | 159.95 |
| 100000 | 1.18 | .50 | .5000 | 25000 | 50000 | 25000 | .5215 | .4785 | 28423 | 52153 | 23923 | 29500 | 50000 | 25000 | -4500 | 178.11 |
| 100000 | 1.19 | .50 | .5000 | 25000 | 50000 | 25000 | .5227 | .4773 | 28616 | 52267 | 23866 | 29750 | 50000 | 25000 | -4750 | 197.11 |
| 100000 | 1.20 | .50 | .5000 | 25000 | 50000 | 25000 | .5238 | .4762 | 28810 | 52381 | 23810 | 30000 | 50000 | 25000 | -5000 | 216.94 |
| 100000 | .80  | .55 | .4500 | 30250 | 49500 | 20250 | .5210 | .4790 | 25504 | 46892 | 21554 | 24200 | 49500 | 20250 | 6050  | 290.62 |
| 100000 | .81  | .55 | .4500 | 30250 | 49500 | 20250 | .5226 | .4774 | 25737 | 47030 | 21485 | 24503 | 49500 | 20250 | 5748  | 259.91 |
| 100000 | .82  | .55 | .4500 | 30250 | 49500 | 20250 | .5241 | .4759 | 25971 | 47168 | 21416 | 24805 | 49500 | 20250 | 5445  | 231.17 |



|        |      |     |       |       |       |       |       |       |       |       |       |       |       |       |       |        |
|--------|------|-----|-------|-------|-------|-------|-------|-------|-------|-------|-------|-------|-------|-------|-------|--------|
| 100000 | .83  | .55 | .4500 | 30250 | 49500 | 20250 | .5256 | .4744 | 26205 | 47304 | 21348 | 25108 | 49500 | 20250 | 5143  | 204.35 |
| 100000 | .84  | .55 | .4500 | 30250 | 49500 | 20250 | .5271 | .4729 | 26440 | 47440 | 21280 | 25410 | 49500 | 20250 | 4840  | 179.41 |
| 100000 | .85  | .55 | .4500 | 30250 | 49500 | 20250 | .5286 | .4714 | 26675 | 47575 | 21213 | 25713 | 49500 | 20250 | 4538  | 156.30 |
| 100000 | .86  | .55 | .4500 | 30250 | 49500 | 20250 | .5301 | .4699 | 26911 | 47709 | 21146 | 26015 | 49500 | 20250 | 4235  | 134.96 |
| 100000 | .87  | .55 | .4500 | 30250 | 49500 | 20250 | .5316 | .4684 | 27146 | 47842 | 21079 | 26318 | 49500 | 20250 | 3933  | 115.36 |
| 100000 | .88  | .55 | .4500 | 30250 | 49500 | 20250 | .5330 | .4670 | 27383 | 47974 | 21013 | 26620 | 49500 | 20250 | 3630  | 97.45  |
| 100000 | .89  | .55 | .4500 | 30250 | 49500 | 20250 | .5345 | .4655 | 27620 | 48106 | 20947 | 26923 | 49500 | 20250 | 3328  | 81.18  |
| 100000 | .90  | .55 | .4500 | 30250 | 49500 | 20250 | .5360 | .4640 | 27857 | 48237 | 20882 | 27225 | 49500 | 20250 | 3025  | 66.52  |
| 100000 | .91  | .55 | .4500 | 30250 | 49500 | 20250 | .5374 | .4626 | 28094 | 48367 | 20817 | 27528 | 49500 | 20250 | 2723  | 53.42  |
| 100000 | .92  | .55 | .4500 | 30250 | 49500 | 20250 | .5388 | .4612 | 28332 | 48496 | 20752 | 27830 | 49500 | 20250 | 2420  | 41.86  |
| 100000 | .93  | .55 | .4500 | 30250 | 49500 | 20250 | .5403 | .4597 | 28571 | 48624 | 20688 | 28133 | 49500 | 20250 | 2118  | 31.78  |
| 100000 | .94  | .55 | .4500 | 30250 | 49500 | 20250 | .5417 | .4583 | 28809 | 48751 | 20624 | 28435 | 49500 | 20250 | 1815  | 23.16  |
| 100000 | .95  | .55 | .4500 | 30250 | 49500 | 20250 | .5431 | .4569 | 29048 | 48878 | 20561 | 28738 | 49500 | 20250 | 1513  | 15.95  |
| 100000 | .96  | .55 | .4500 | 30250 | 49500 | 20250 | .5445 | .4555 | 29288 | 49004 | 20498 | 29040 | 49500 | 20250 | 1210  | 10.12  |
| 100000 | .97  | .55 | .4500 | 30250 | 49500 | 20250 | .5459 | .4541 | 29528 | 49129 | 20435 | 29343 | 49500 | 20250 | 908   | 5.65   |
| 100000 | .98  | .55 | .4500 | 30250 | 49500 | 20250 | .5473 | .4527 | 29768 | 49253 | 20373 | 29645 | 49500 | 20250 | 605   | 2.49   |
| 100000 | .99  | .55 | .4500 | 30250 | 49500 | 20250 | .5486 | .4514 | 30009 | 49377 | 20311 | 29948 | 49500 | 20250 | 303   | .62    |
| 100000 | 1.00 | .55 | .4500 | 30250 | 49500 | 20250 | .5500 | .4500 | 30250 | 49500 | 20250 | 30250 | 49500 | 20250 | 0     | .00    |
| 100000 | 1.01 | .55 | .4500 | 30250 | 49500 | 20250 | .5514 | .4486 | 30491 | 49622 | 20189 | 30553 | 49500 | 20250 | -303  | .61    |
| 100000 | 1.02 | .55 | .4500 | 30250 | 49500 | 20250 | .5527 | .4473 | 30733 | 49744 | 20128 | 30855 | 49500 | 20250 | -605  | 2.41   |
| 100000 | 1.03 | .55 | .4500 | 30250 | 49500 | 20250 | .5540 | .4460 | 30975 | 49864 | 20068 | 31158 | 49500 | 20250 | -908  | 5.38   |
| 100000 | 1.04 | .55 | .4500 | 30250 | 49500 | 20250 | .5554 | .4446 | 31218 | 49984 | 20008 | 31460 | 49500 | 20250 | -1210 | 9.50   |
| 100000 | 1.05 | .55 | .4500 | 30250 | 49500 | 20250 | .5567 | .4433 | 31461 | 50103 | 19948 | 31763 | 49500 | 20250 | -1513 | 14.72  |
| 100000 | 1.06 | .55 | .4500 | 30250 | 49500 | 20250 | .5580 | .4420 | 31704 | 50222 | 19889 | 32065 | 49500 | 20250 | -1815 | 21.04  |
| 100000 | 1.07 | .55 | .4500 | 30250 | 49500 | 20250 | .5593 | .4407 | 31948 | 50340 | 19830 | 32368 | 49500 | 20250 | -2118 | 28.42  |
| 100000 | 1.08 | .55 | .4500 | 30250 | 49500 | 20250 | .5606 | .4394 | 32192 | 50457 | 19772 | 32670 | 49500 | 20250 | -2420 | 36.84  |
| 100000 | 1.09 | .55 | .4500 | 30250 | 49500 | 20250 | .5619 | .4381 | 32436 | 50573 | 19713 | 32973 | 49500 | 20250 | -2723 | 46.27  |
| 100000 | 1.10 | .55 | .4500 | 30250 | 49500 | 20250 | .5632 | .4368 | 32680 | 50689 | 19655 | 33275 | 49500 | 20250 | -3025 | 56.70  |

|        |      |     |       |       |       |       |       |       |       |       |       |       |       |       |       |        |
|--------|------|-----|-------|-------|-------|-------|-------|-------|-------|-------|-------|-------|-------|-------|-------|--------|
| 100000 | 1.11 | .55 | .4500 | 30250 | 49500 | 20250 | .5645 | .4355 | 32925 | 50804 | 19598 | 33578 | 49500 | 20250 | -3328 | 68.10  |
| 100000 | 1.12 | .55 | .4500 | 30250 | 49500 | 20250 | .5658 | .4342 | 33171 | 50919 | 19541 | 33880 | 49500 | 20250 | -3630 | 80.44  |
| 100000 | 1.13 | .55 | .4500 | 30250 | 49500 | 20250 | .5670 | .4330 | 33416 | 51032 | 19484 | 34183 | 49500 | 20250 | -3933 | 93.71  |
| 100000 | 1.14 | .55 | .4500 | 30250 | 49500 | 20250 | .5683 | .4317 | 33662 | 51145 | 19427 | 34485 | 49500 | 20250 | -4235 | 107.89 |
| 100000 | 1.15 | .55 | .4500 | 30250 | 49500 | 20250 | .5695 | .4305 | 33909 | 51258 | 19371 | 34788 | 49500 | 20250 | -4538 | 122.96 |
| 100000 | 1.16 | .55 | .4500 | 30250 | 49500 | 20250 | .5708 | .4292 | 34155 | 51370 | 19315 | 35090 | 49500 | 20250 | -4840 | 138.89 |
| 100000 | 1.17 | .55 | .4500 | 30250 | 49500 | 20250 | .5720 | .4280 | 34402 | 51481 | 19260 | 35393 | 49500 | 20250 | -5143 | 155.66 |
| 100000 | 1.18 | .55 | .4500 | 30250 | 49500 | 20250 | .5732 | .4268 | 34649 | 51591 | 19204 | 35695 | 49500 | 20250 | -5445 | 173.27 |
| 100000 | 1.19 | .55 | .4500 | 30250 | 49500 | 20250 | .5745 | .4255 | 34897 | 51701 | 19149 | 35998 | 49500 | 20250 | -5748 | 191.69 |
| 100000 | 1.20 | .55 | .4500 | 30250 | 49500 | 20250 | .5757 | .4243 | 35145 | 51810 | 19095 | 36300 | 49500 | 20250 | -6050 | 210.90 |
| 100000 | .80  | .60 | .4000 | 36000 | 48000 | 16000 | .5690 | .4310 | 30041 | 45517 | 17241 | 28800 | 48000 | 16000 | 7200  | 276.10 |
| 100000 | .81  | .60 | .4000 | 36000 | 48000 | 16000 | .5706 | .4294 | 30335 | 45650 | 17175 | 29160 | 48000 | 16000 | 6840  | 246.77 |
| 100000 | .82  | .60 | .4000 | 36000 | 48000 | 16000 | .5723 | .4277 | 30629 | 45783 | 17109 | 29520 | 48000 | 16000 | 6480  | 219.35 |
| 100000 | .83  | .60 | .4000 | 36000 | 48000 | 16000 | .5739 | .4261 | 30923 | 45914 | 17043 | 29880 | 48000 | 16000 | 6120  | 193.79 |
| 100000 | .84  | .60 | .4000 | 36000 | 48000 | 16000 | .5756 | .4244 | 31218 | 46044 | 16978 | 30240 | 48000 | 16000 | 5760  | 170.04 |
| 100000 | .85  | .60 | .4000 | 36000 | 48000 | 16000 | .5772 | .4228 | 31513 | 46173 | 16913 | 30600 | 48000 | 16000 | 5400  | 148.05 |
| 100000 | .86  | .60 | .4000 | 36000 | 48000 | 16000 | .5788 | .4212 | 31809 | 46302 | 16849 | 30960 | 48000 | 16000 | 5040  | 127.77 |
| 100000 | .87  | .60 | .4000 | 36000 | 48000 | 16000 | .5804 | .4196 | 32106 | 46429 | 16786 | 31320 | 48000 | 16000 | 4680  | 109.15 |
| 100000 | .88  | .60 | .4000 | 36000 | 48000 | 16000 | .5819 | .4181 | 32402 | 46555 | 16722 | 31680 | 48000 | 16000 | 4320  | 92.15  |

|        |      |     |       |       |       |       |       |       |       |       |       |       |       |       |       |            |
|--------|------|-----|-------|-------|-------|-------|-------|-------|-------|-------|-------|-------|-------|-------|-------|------------|
| 100000 | .89  | .60 | .4000 | 36000 | 48000 | 16000 | .5835 | .4165 | 32700 | 46681 | 16660 | 32040 | 48000 | 16000 | 3960  | 76.73      |
| 100000 | .90  | .60 | .4000 | 36000 | 48000 | 16000 | .5851 | .4149 | 32998 | 46805 | 16598 | 32400 | 48000 | 16000 | 3600  | 62.84      |
| 100000 | .91  | .60 | .4000 | 36000 | 48000 | 16000 | .5866 | .4134 | 33296 | 46928 | 16536 | 32760 | 48000 | 16000 | 3240  | 50.45      |
| 100000 | .92  | .60 | .4000 | 36000 | 48000 | 16000 | .5881 | .4119 | 33594 | 47051 | 16474 | 33120 | 48000 | 16000 | 2880  | 39.50      |
| 100000 | .93  | .60 | .4000 | 36000 | 48000 | 16000 | .5897 | .4103 | 33894 | 47173 | 16414 | 33480 | 48000 | 16000 | 2520  | 29.98      |
| 100000 | .94  | .60 | .4000 | 36000 | 48000 | 16000 | .5912 | .4088 | 34193 | 47294 | 16353 | 33840 | 48000 | 16000 | 2160  | 21.83      |
| 100000 | .95  | .60 | .4000 | 36000 | 48000 | 16000 | .5927 | .4073 | 34493 | 47413 | 16293 | 34200 | 48000 | 16000 | 1800  | 15.03      |
| 100000 | .96  | .60 | .4000 | 36000 | 48000 | 16000 | .5942 | .4058 | 34794 | 47532 | 16234 | 34560 | 48000 | 16000 | 1440  | 9.54       |
| 100000 | .97  | .60 | .4000 | 36000 | 48000 | 16000 | .5956 | .4044 | 35095 | 47651 | 16175 | 34920 | 48000 | 16000 | 1080  | 5.32       |
| 100000 | .98  | .60 | .4000 | 36000 | 48000 | 16000 | .5971 | .4029 | 35396 | 47768 | 16116 | 35280 | 48000 | 16000 | 720   | 2.34       |
| 100000 | .99  | .60 | .4000 | 36000 | 48000 | 16000 | .5986 | .4014 | 35698 | 47884 | 16058 | 35640 | 48000 | 16000 | 360   | .58        |
| 100000 | 1.00 | .60 | .4000 | 36000 | 48000 | 16000 | .6000 | .4000 | 36000 | 48000 | 16000 | 36000 | 48000 | 16000 | 0     | .00        |
| 100000 | 1.01 | .60 | .4000 | 36000 | 48000 | 16000 | .6014 | .3986 | 36303 | 48115 | 15943 | 36360 | 48000 | 16000 | -360  | .57        |
| 100000 | 1.02 | .60 | .4000 | 36000 | 48000 | 16000 | .6029 | .3971 | 36606 | 48229 | 15886 | 36720 | 48000 | 16000 | -720  | 2.27       |
| 100000 | 1.03 | .60 | .4000 | 36000 | 48000 | 16000 | .6043 | .3957 | 36909 | 48342 | 15829 | 37080 | 48000 | 16000 | -1080 | 5.06       |
| 100000 | 1.04 | .60 | .4000 | 36000 | 48000 | 16000 | .6057 | .3943 | 37213 | 48454 | 15773 | 37440 | 48000 | 16000 | -1440 | 8.92       |
| 100000 | 1.05 | .60 | .4000 | 36000 | 48000 | 16000 | .6071 | .3929 | 37517 | 48566 | 15717 | 37800 | 48000 | 16000 | -1800 | 13.82      |
| 100000 | 1.06 | .60 | .4000 | 36000 | 48000 | 16000 | .6085 | .3915 | 37822 | 48677 | 15662 | 38160 | 48000 | 16000 | -2160 | 19.74      |
| 100000 | 1.07 | .60 | .4000 | 36000 | 48000 | 16000 | .6098 | .3902 | 38127 | 48787 | 15607 | 38520 | 48000 | 16000 | -2520 | 26.65      |
| 100000 | 1.08 | .60 | .4000 | 36000 | 48000 | 16000 | .6112 | .3888 | 38432 | 48896 | 15552 | 38880 | 48000 | 16000 | -2880 | 34.53      |
| 100000 | 1.09 | .60 | .4000 | 36000 | 48000 | 16000 | .6126 | .3874 | 38738 | 49004 | 15498 | 39240 | 48000 | 16000 | -3240 | 43.36      |
| 100000 | 1.10 | .60 | .4000 | 36000 | 48000 | 16000 | .6139 | .3861 | 39044 | 49112 | 15444 | 39600 | 48000 | 16000 | -3600 | 53.11      |
| 100000 | 1.11 | .60 | .4000 | 36000 | 48000 | 16000 | .6152 | .3848 | 39351 | 49219 | 15391 | 39960 | 48000 | 16000 | -3960 | 63.76      |
| 100000 | 1.12 | .60 | .4000 | 36000 | 48000 | 16000 | .6166 | .3834 | 39657 | 49325 | 15337 | 40320 | 48000 | 16000 | -4320 | 75.29      |
| 100000 | 1.13 | .60 | .4000 | 36000 | 48000 | 16000 | .6179 | .3821 | 39965 | 49431 | 15285 | 40680 | 48000 | 16000 | -4680 | 87.69      |
| 100000 | 1.14 | .60 | .4000 | 36000 | 48000 | 16000 | .6192 | .3808 | 40272 | 49535 | 15232 | 41040 | 48000 | 16000 | -5040 | 100.9<br>2 |
| 100000 | 1.15 | .60 | .4000 | 36000 | 48000 | 16000 | .6205 | .3795 | 40580 | 49639 | 15180 | 41400 | 48000 | 16000 | -5400 | 114.9<br>7 |
| 100000 | 1.16 | .60 | .4000 | 36000 | 48000 | 16000 | .6218 | .3782 | 40889 | 49743 | 15129 | 41760 | 48000 | 16000 | -5760 | 129.8<br>3 |
| 100000 | 1.17 | .60 | .4000 | 36000 | 48000 | 16000 | .6231 | .3769 | 41197 | 49845 | 15077 | 42120 | 48000 | 16000 | -6120 | 145.4<br>6 |

|        |      |     |       |       |       |       |       |       |       |       |       |       |       |       |       |        |
|--------|------|-----|-------|-------|-------|-------|-------|-------|-------|-------|-------|-------|-------|-------|-------|--------|
| 100000 | 1.18 | .60 | .4000 | 36000 | 48000 | 16000 | .6243 | .3757 | 41506 | 49947 | 15026 | 42480 | 48000 | 16000 | -6480 | 161.87 |
| 100000 | 1.19 | .60 | .4000 | 36000 | 48000 | 16000 | .6256 | .3744 | 41816 | 50049 | 14976 | 42840 | 48000 | 16000 | -6840 | 179.02 |
| 100000 | 1.20 | .60 | .4000 | 36000 | 48000 | 16000 | .6269 | .3731 | 42125 | 50149 | 14925 | 43200 | 48000 | 16000 | -7200 | 196.90 |
| 100000 | .80  | .65 | .3500 | 42250 | 45500 | 12250 | .6177 | .3823 | 34931 | 43239 | 13381 | 33800 | 45500 | 12250 | 8450  | 250.40 |
| 100000 | .81  | .65 | .3500 | 42250 | 45500 | 12250 | .6195 | .3805 | 35292 | 43362 | 13319 | 34223 | 45500 | 12250 | 8028  | 223.68 |
| 100000 | .82  | .65 | .3500 | 42250 | 45500 | 12250 | .6212 | .3788 | 35653 | 43483 | 13258 | 34645 | 45500 | 12250 | 7605  | 198.72 |
| 100000 | .83  | .65 | .3500 | 42250 | 45500 | 12250 | .6229 | .3771 | 36015 | 43604 | 13198 | 35068 | 45500 | 12250 | 7183  | 175.47 |
| 100000 | .84  | .65 | .3500 | 42250 | 45500 | 12250 | .6246 | .3754 | 36378 | 43724 | 13138 | 35490 | 45500 | 12250 | 6760  | 153.88 |
| 100000 | .85  | .65 | .3500 | 42250 | 45500 | 12250 | .6263 | .3737 | 36741 | 43842 | 13079 | 35913 | 45500 | 12250 | 6338  | 133.91 |
| 100000 | .86  | .65 | .3500 | 42250 | 45500 | 12250 | .6280 | .3720 | 37105 | 43960 | 13020 | 36335 | 45500 | 12250 | 5915  | 115.51 |
| 100000 | .87  | .65 | .3500 | 42250 | 45500 | 12250 | .6297 | .3703 | 37469 | 44076 | 12962 | 36758 | 45500 | 12250 | 5493  | 98.63  |
| 100000 | .88  | .65 | .3500 | 42250 | 45500 | 12250 | .6313 | .3687 | 37834 | 44192 | 12904 | 37180 | 45500 | 12250 | 5070  | 83.23  |
| 100000 | .89  | .65 | .3500 | 42250 | 45500 | 12250 | .6329 | .3671 | 38200 | 44306 | 12847 | 37603 | 45500 | 12250 | 4648  | 69.27  |
| 100000 | .90  | .65 | .3500 | 42250 | 45500 | 12250 | .6346 | .3654 | 38565 | 44419 | 12790 | 38025 | 45500 | 12250 | 4225  | 56.70  |
| 100000 | .91  | .65 | .3500 | 42250 | 45500 | 12250 | .6362 | .3638 | 38932 | 44532 | 12734 | 38448 | 45500 | 12250 | 3803  | 45.50  |
| 100000 | .92  | .65 | .3500 | 42250 | 45500 | 12250 | .6378 | .3622 | 39299 | 44643 | 12679 | 38870 | 45500 | 12250 | 3380  | 35.61  |
| 100000 | .93  | .65 | .3500 | 42250 | 45500 | 12250 | .6393 | .3607 | 39666 | 44753 | 12623 | 39293 | 45500 | 12250 | 2958  | 27.01  |
| 100000 | .94  | .65 | .3500 | 42250 | 45500 | 12250 | .6409 | .3591 | 40034 | 44863 | 12569 | 39715 | 45500 | 12250 | 2535  | 19.66  |
| 100000 | .95  | .65 | .3500 | 42250 | 45500 | 12250 | .6424 | .3576 | 40402 | 44971 | 12514 | 40138 | 45500 | 12250 | 2113  | 13.53  |
| 100000 | .96  | .65 | .3500 | 42250 | 45500 | 12250 | .6440 | .3560 | 40771 | 45079 | 12461 | 40560 | 45500 | 12250 | 1690  | 8.58   |
| 100000 | .97  | .65 | .3500 | 42250 | 45500 | 12250 | .6455 | .3545 | 41140 | 45185 | 12407 | 40983 | 45500 | 12250 | 1268  | 4.78   |
| 100000 | .98  | .65 | .3500 | 42250 | 45500 | 12250 | .6470 | .3530 | 41509 | 45291 | 12354 | 41405 | 45500 | 12250 | 845   | 2.11   |
| 100000 | .99  | .65 | .3500 | 42250 | 45500 | 12250 | .6485 | .3515 | 41879 | 45396 | 12302 | 41828 | 45500 | 12250 | 423   | .52    |
| 100000 | 1.00 | .65 | .3500 | 42250 | 45500 | 12250 | .6500 | .3500 | 42250 | 45500 | 12250 | 42250 | 45500 | 12250 | 0     | .00    |

|        |      |     |       |       |       |       |       |       |       |       |       |       |       |       |       |        |
|--------|------|-----|-------|-------|-------|-------|-------|-------|-------|-------|-------|-------|-------|-------|-------|--------|
| 100000 | 1.01 | .65 | .3500 | 42250 | 45500 | 12250 | .6515 | .3485 | 42621 | 45603 | 12198 | 42673 | 45500 | 12250 | -423  | .51    |
| 100000 | 1.02 | .65 | .3500 | 42250 | 45500 | 12250 | .6529 | .3471 | 42992 | 45705 | 12147 | 43095 | 45500 | 12250 | -845  | 2.03   |
| 100000 | 1.03 | .65 | .3500 | 42250 | 45500 | 12250 | .6544 | .3456 | 43364 | 45807 | 12097 | 43518 | 45500 | 12250 | -1268 | 4.54   |
| 100000 | 1.04 | .65 | .3500 | 42250 | 45500 | 12250 | .6558 | .3442 | 43736 | 45907 | 12046 | 43940 | 45500 | 12250 | -1690 | 8.00   |
| 100000 | 1.05 | .65 | .3500 | 42250 | 45500 | 12250 | .6572 | .3428 | 44109 | 46007 | 11997 | 44363 | 45500 | 12250 | -2113 | 12.39  |
| 100000 | 1.06 | .65 | .3500 | 42250 | 45500 | 12250 | .6587 | .3413 | 44482 | 46106 | 11947 | 44785 | 45500 | 12250 | -2535 | 17.70  |
| 100000 | 1.07 | .65 | .3500 | 42250 | 45500 | 12250 | .6601 | .3399 | 44856 | 46204 | 11898 | 45208 | 45500 | 12250 | -2958 | 23.89  |
| 100000 | 1.08 | .65 | .3500 | 42250 | 45500 | 12250 | .6614 | .3386 | 45229 | 46301 | 11849 | 45630 | 45500 | 12250 | -3380 | 30.94  |
| 100000 | 1.09 | .65 | .3500 | 42250 | 45500 | 12250 | .6628 | .3372 | 45604 | 46397 | 11801 | 46053 | 45500 | 12250 | -3803 | 38.84  |
| 100000 | 1.10 | .65 | .3500 | 42250 | 45500 | 12250 | .6642 | .3358 | 45978 | 46493 | 11753 | 46475 | 45500 | 12250 | -4225 | 47.56  |
| 100000 | 1.11 | .65 | .3500 | 42250 | 45500 | 12250 | .6655 | .3345 | 46353 | 46588 | 11706 | 46898 | 45500 | 12250 | -4648 | 57.08  |
| 100000 | 1.12 | .65 | .3500 | 42250 | 45500 | 12250 | .6669 | .3331 | 46729 | 46682 | 11659 | 47320 | 45500 | 12250 | -5070 | 67.39  |
| 100000 | 1.13 | .65 | .3500 | 42250 | 45500 | 12250 | .6682 | .3318 | 47105 | 46776 | 11612 | 47743 | 45500 | 12250 | -5493 | 78.45  |
| 100000 | 1.14 | .65 | .3500 | 42250 | 45500 | 12250 | .6695 | .3305 | 47481 | 46868 | 11566 | 48165 | 45500 | 12250 | -5915 | 90.27  |
| 100000 | 1.15 | .65 | .3500 | 42250 | 45500 | 12250 | .6709 | .3291 | 47857 | 46960 | 11520 | 48588 | 45500 | 12250 | -6338 | 102.81 |
| 100000 | 1.16 | .65 | .3500 | 42250 | 45500 | 12250 | .6722 | .3278 | 48234 | 47051 | 11474 | 49010 | 45500 | 12250 | -6760 | 116.06 |
| 100000 | 1.17 | .65 | .3500 | 42250 | 45500 | 12250 | .6735 | .3265 | 48612 | 47142 | 11429 | 49433 | 45500 | 12250 | -7183 | 130.00 |
| 100000 | 1.18 | .65 | .3500 | 42250 | 45500 | 12250 | .6747 | .3253 | 48989 | 47232 | 11384 | 49855 | 45500 | 12250 | -7605 | 144.62 |
| 100000 | 1.19 | .65 | .3500 | 42250 | 45500 | 12250 | .6760 | .3240 | 49367 | 47321 | 11340 | 50278 | 45500 | 12250 | -8028 | 159.90 |
| 100000 | 1.20 | .65 | .3500 | 42250 | 45500 | 12250 | .6773 | .3227 | 49746 | 47409 | 11296 | 50700 | 45500 | 12250 | -8450 | 175.83 |
| 100000 | .80  | .70 | .3000 | 49000 | 42000 | 9000  | .6674 | .3326 | 40178 | 40044 | 9978  | 39200 | 42000 | 9000  | 9800  | 215.13 |
| 100000 | .81  | .70 | .3000 | 49000 | 42000 | 9000  | .6692 | .3308 | 40614 | 40152 | 9924  | 39690 | 42000 | 9000  | 9310  | 192.07 |
| 100000 | .82  | .70 | .3000 | 49000 | 42000 | 9000  | .6710 | .3290 | 41051 | 40259 | 9871  | 40180 | 42000 | 9000  | 8820  | 170.55 |
| 100000 | .83  | .70 | .3000 | 49000 | 42000 | 9000  | .6727 | .3273 | 41488 | 40364 | 9818  | 40670 | 42000 | 9000  | 8330  | 150.53 |

|        |      |     |       |       |       |      |       |       |       |       |      |       |       |      |       |        |
|--------|------|-----|-------|-------|-------|------|-------|-------|-------|-------|------|-------|-------|------|-------|--------|
| 100000 | .84  | .70 | .3000 | 49000 | 42000 | 9000 | .6745 | .3255 | 41926 | 40469 | 9766 | 41160 | 42000 | 9000 | 7840  | 131.95 |
| 100000 | .85  | .70 | .3000 | 49000 | 42000 | 9000 | .6762 | .3238 | 42364 | 40572 | 9714 | 41650 | 42000 | 9000 | 7350  | 114.77 |
| 100000 | .86  | .70 | .3000 | 49000 | 42000 | 9000 | .6779 | .3221 | 42803 | 40674 | 9663 | 42140 | 42000 | 9000 | 6860  | 98.95  |
| 100000 | .87  | .70 | .3000 | 49000 | 42000 | 9000 | .6796 | .3204 | 43242 | 40775 | 9612 | 42630 | 42000 | 9000 | 6370  | 84.45  |
| 100000 | .88  | .70 | .3000 | 49000 | 42000 | 9000 | .6813 | .3187 | 43682 | 40875 | 9562 | 43120 | 42000 | 9000 | 5880  | 71.23  |
| 100000 | .89  | .70 | .3000 | 49000 | 42000 | 9000 | .6829 | .3171 | 44123 | 40975 | 9513 | 43610 | 42000 | 9000 | 5390  | 59.26  |
| 100000 | .90  | .70 | .3000 | 49000 | 42000 | 9000 | .6845 | .3155 | 44564 | 41073 | 9464 | 44100 | 42000 | 9000 | 4900  | 48.49  |
| 100000 | .91  | .70 | .3000 | 49000 | 42000 | 9000 | .6862 | .3138 | 45005 | 41170 | 9415 | 44590 | 42000 | 9000 | 4410  | 38.89  |
| 100000 | .92  | .70 | .3000 | 49000 | 42000 | 9000 | .6878 | .3122 | 45447 | 41266 | 9367 | 45080 | 42000 | 9000 | 3920  | 30.43  |
| 100000 | .93  | .70 | .3000 | 49000 | 42000 | 9000 | .6893 | .3107 | 45890 | 41361 | 9320 | 45570 | 42000 | 9000 | 3430  | 23.07  |
| 100000 | .94  | .70 | .3000 | 49000 | 42000 | 9000 | .6909 | .3091 | 46333 | 41455 | 9273 | 46060 | 42000 | 9000 | 2940  | 16.79  |
| 100000 | .95  | .70 | .3000 | 49000 | 42000 | 9000 | .6925 | .3075 | 46776 | 41548 | 9226 | 46550 | 42000 | 9000 | 2450  | 11.55  |
| 100000 | .96  | .70 | .3000 | 49000 | 42000 | 9000 | .6940 | .3060 | 47220 | 41640 | 9180 | 47040 | 42000 | 9000 | 1960  | 7.32   |
| 100000 | .97  | .70 | .3000 | 49000 | 42000 | 9000 | .6955 | .3045 | 47664 | 41731 | 9134 | 47530 | 42000 | 9000 | 1470  | 4.08   |
| 100000 | .98  | .70 | .3000 | 49000 | 42000 | 9000 | .6970 | .3030 | 48109 | 41822 | 9089 | 48020 | 42000 | 9000 | 980   | 1.80   |
| 100000 | .99  | .70 | .3000 | 49000 | 42000 | 9000 | .6985 | .3015 | 48554 | 41911 | 9044 | 48510 | 42000 | 9000 | 490   | .45    |
| 100000 | 1.00 | .70 | .3000 | 49000 | 42000 | 9000 | .7000 | .3000 | 49000 | 42000 | 9000 | 49000 | 42000 | 9000 | 0     | .00    |
| 100000 | 1.01 | .70 | .3000 | 49000 | 42000 | 9000 | .7015 | .2985 | 49446 | 42088 | 8956 | 49490 | 42000 | 9000 | -490  | .44    |
| 100000 | 1.02 | .70 | .3000 | 49000 | 42000 | 9000 | .7029 | .2971 | 49893 | 42175 | 8913 | 49980 | 42000 | 9000 | -980  | 1.73   |
| 100000 | 1.03 | .70 | .3000 | 49000 | 42000 | 9000 | .7043 | .2957 | 50340 | 42261 | 8870 | 50470 | 42000 | 9000 | -1470 | 3.86   |
| 100000 | 1.04 | .70 | .3000 | 49000 | 42000 | 9000 | .7058 | .2942 | 50787 | 42346 | 8827 | 50960 | 42000 | 9000 | -1960 | 6.81   |
| 100000 | 1.05 | .70 | .3000 | 49000 | 42000 | 9000 | .7072 | .2928 | 51235 | 42430 | 8785 | 51450 | 42000 | 9000 | -2450 | 10.54  |
| 100000 | 1.06 | .70 | .3000 | 49000 | 42000 | 9000 | .7086 | .2914 | 51683 | 42514 | 8743 | 51940 | 42000 | 9000 | -2940 | 15.05  |
| 100000 | 1.07 | .70 | .3000 | 49000 | 42000 | 9000 | .7099 | .2901 | 52132 | 42597 | 8702 | 52430 | 42000 | 9000 | -3430 | 20.31  |
| 100000 | 1.08 | .70 | .3000 | 49000 | 42000 | 9000 | .7113 | .2887 | 52581 | 42679 | 8661 | 52920 | 42000 | 9000 | -3920 | 26.30  |
| 100000 | 1.09 | .70 | .3000 | 49000 | 42000 | 9000 | .7127 | .2873 | 53030 | 42760 | 8620 | 53410 | 42000 | 9000 | -4410 | 33.01  |
| 100000 | 1.10 | .70 | .3000 | 49000 | 42000 | 9000 | .7140 | .2860 | 53480 | 42841 | 8580 | 53900 | 42000 | 9000 | -4900 | 40.41  |
| 100000 | 1.11 | .70 | .3000 | 49000 | 42000 | 9000 | .7153 | .2847 | 53930 | 42921 | 8540 | 54390 | 42000 | 9000 | -5390 | 48.48  |
| 100000 | 1.12 | .70 | .3000 | 49000 | 42000 | 9000 | .7167 | .2833 | 54380 | 43000 | 8500 | 54880 | 42000 | 9000 | -5880 | 57.22  |
| 100000 | 1.13 | .70 | .3000 | 49000 | 42000 | 9000 | .7180 | .2820 | 54831 | 43078 | 8461 | 55370 | 42000 | 9000 | -6370 | 66.60  |
| 100000 | 1.14 | .70 | .3000 | 49000 | 42000 | 9000 | .7193 | .2807 | 55282 | 43156 | 8422 | 55860 | 42000 | 9000 | -6860 | 76.61  |

|        |      |     |       |       |       |      |       |       |       |       |      |       |       |      |       |        |
|--------|------|-----|-------|-------|-------|------|-------|-------|-------|-------|------|-------|-------|------|-------|--------|
| 100000 | 1.15 | .70 | .3000 | 49000 | 42000 | 9000 | .7205 | .2795 | 55734 | 43232 | 8384 | 56350 | 42000 | 9000 | -7350 | 87.24  |
| 100000 | 1.16 | .70 | .3000 | 49000 | 42000 | 9000 | .7218 | .2782 | 56186 | 43309 | 8346 | 56840 | 42000 | 9000 | -7840 | 98.46  |
| 100000 | 1.17 | .70 | .3000 | 49000 | 42000 | 9000 | .7231 | .2769 | 56638 | 43384 | 8308 | 57330 | 42000 | 9000 | -8330 | 110.26 |
| 100000 | 1.18 | .70 | .3000 | 49000 | 42000 | 9000 | .7243 | .2757 | 57091 | 43459 | 8271 | 57820 | 42000 | 9000 | -8820 | 122.64 |
| 100000 | 1.19 | .70 | .3000 | 49000 | 42000 | 9000 | .7256 | .2744 | 57543 | 43533 | 8233 | 58310 | 42000 | 9000 | -9310 | 135.56 |
| 100000 | 1.20 | .70 | .3000 | 49000 | 42000 | 9000 | .7268 | .2732 | 57997 | 43607 | 8197 | 58800 | 42000 | 9000 | -9800 | 149.04 |
| 100000 | .80  | .75 | .2500 | 56250 | 37500 | 6250 | .7183 | .2817 | 45792 | 35915 | 7042 | 45000 | 37500 | 6250 | 11250 | 172.74 |
| 100000 | .81  | .75 | .2500 | 56250 | 37500 | 6250 | .7201 | .2799 | 46310 | 36004 | 6998 | 45563 | 37500 | 6250 | 10688 | 154.15 |
| 100000 | .82  | .75 | .2500 | 56250 | 37500 | 6250 | .7218 | .2782 | 46829 | 36092 | 6954 | 46125 | 37500 | 6250 | 10125 | 136.82 |
| 100000 | .83  | .75 | .2500 | 56250 | 37500 | 6250 | .7236 | .2764 | 47348 | 36178 | 6911 | 46688 | 37500 | 6250 | 9563  | 120.70 |
| 100000 | .84  | .75 | .2500 | 56250 | 37500 | 6250 | .7253 | .2747 | 47868 | 36264 | 6868 | 47250 | 37500 | 6250 | 9000  | 105.76 |
| 100000 | .85  | .75 | .2500 | 56250 | 37500 | 6250 | .7270 | .2730 | 48388 | 36348 | 6826 | 47813 | 37500 | 6250 | 8438  | 91.95  |
| 100000 | .86  | .75 | .2500 | 56250 | 37500 | 6250 | .7286 | .2714 | 48909 | 36431 | 6784 | 48375 | 37500 | 6250 | 7875  | 79.25  |
| 100000 | .87  | .75 | .2500 | 56250 | 37500 | 6250 | .7303 | .2697 | 49431 | 36514 | 6743 | 48938 | 37500 | 6250 | 7313  | 67.61  |
| 100000 | .88  | .75 | .2500 | 56250 | 37500 | 6250 | .7319 | .2681 | 49952 | 36595 | 6702 | 49500 | 37500 | 6250 | 6750  | 57.01  |
| 100000 | .89  | .75 | .2500 | 56250 | 37500 | 6250 | .7335 | .2665 | 50475 | 36676 | 6662 | 50063 | 37500 | 6250 | 6188  | 47.41  |
| 100000 | .90  | .75 | .2500 | 56250 | 37500 | 6250 | .7351 | .2649 | 50998 | 36755 | 6623 | 50625 | 37500 | 6250 | 5625  | 38.78  |
| 100000 | .91  | .75 | .2500 | 56250 | 37500 | 6250 | .7367 | .2633 | 51521 | 36833 | 6583 | 51188 | 37500 | 6250 | 5063  | 31.09  |
| 100000 | .92  | .75 | .2500 | 56250 | 37500 | 6250 | .7382 | .2618 | 52045 | 36911 | 6545 | 51750 | 37500 | 6250 | 4500  | 24.32  |
| 100000 | .93  | .75 | .2500 | 56250 | 37500 | 6250 | .7398 | .2602 | 52569 | 36988 | 6506 | 52313 | 37500 | 6250 | 3938  | 18.43  |
| 100000 | .94  | .75 | .2500 | 56250 | 37500 | 6250 | .7413 | .2587 | 53093 | 37063 | 6468 | 52875 | 37500 | 6250 | 3375  | 13.41  |
| 100000 | .95  | .75 | .2500 | 56250 | 37500 | 6250 | .7428 | .2572 | 53618 | 37138 | 6431 | 53438 | 37500 | 6250 | 2813  | 9.22   |
| 100000 | .96  | .75 | .2500 | 56250 | 37500 | 6250 | .7442 | .2558 | 54144 | 37212 | 6394 | 54000 | 37500 | 6250 | 2250  | 5.84   |
| 100000 | .97  | .75 | .2500 | 56250 | 37500 | 6250 | .7457 | .2543 | 54670 | 37285 | 6357 | 54563 | 37500 | 6250 | 1688  | 3.26   |

|        |      |     |       |       |       |      |       |       |       |       |      |       |       |      |        |        |
|--------|------|-----|-------|-------|-------|------|-------|-------|-------|-------|------|-------|-------|------|--------|--------|
| 100000 | .98  | .75 | .2500 | 56250 | 37500 | 6250 | .7472 | .2528 | 55196 | 37358 | 6321 | 55125 | 37500 | 6250 | 1125   | 1.43   |
| 100000 | .99  | .75 | .2500 | 56250 | 37500 | 6250 | .7486 | .2514 | 55723 | 37429 | 6285 | 55688 | 37500 | 6250 | 563    | .35    |
| 100000 | 1.00 | .75 | .2500 | 56250 | 37500 | 6250 | .7500 | .2500 | 56250 | 37500 | 6250 | 56250 | 37500 | 6250 | 0      | .00    |
| 100000 | 1.01 | .75 | .2500 | 56250 | 37500 | 6250 | .7514 | .2486 | 56778 | 37570 | 6215 | 56813 | 37500 | 6250 | -563   | .35    |
| 100000 | 1.02 | .75 | .2500 | 56250 | 37500 | 6250 | .7528 | .2472 | 57305 | 37639 | 6180 | 57375 | 37500 | 6250 | -1125  | 1.38   |
| 100000 | 1.03 | .75 | .2500 | 56250 | 37500 | 6250 | .7541 | .2459 | 57834 | 37707 | 6146 | 57938 | 37500 | 6250 | -1688  | 3.08   |
| 100000 | 1.04 | .75 | .2500 | 56250 | 37500 | 6250 | .7555 | .2445 | 58362 | 37775 | 6112 | 58500 | 37500 | 6250 | -2250  | 5.42   |
| 100000 | 1.05 | .75 | .2500 | 56250 | 37500 | 6250 | .7568 | .2432 | 58892 | 37842 | 6079 | 59063 | 37500 | 6250 | -2813  | 8.39   |
| 100000 | 1.06 | .75 | .2500 | 56250 | 37500 | 6250 | .7582 | .2418 | 59421 | 37908 | 6046 | 59625 | 37500 | 6250 | -3375  | 11.98  |
| 100000 | 1.07 | .75 | .2500 | 56250 | 37500 | 6250 | .7595 | .2405 | 59951 | 37974 | 6013 | 60188 | 37500 | 6250 | -3938  | 16.16  |
| 100000 | 1.08 | .75 | .2500 | 56250 | 37500 | 6250 | .7608 | .2392 | 60481 | 38038 | 5981 | 60750 | 37500 | 6250 | -4500  | 20.93  |
| 100000 | 1.09 | .75 | .2500 | 56250 | 37500 | 6250 | .7620 | .2380 | 61011 | 38102 | 5949 | 61313 | 37500 | 6250 | -5063  | 26.25  |
| 100000 | 1.10 | .75 | .2500 | 56250 | 37500 | 6250 | .7633 | .2367 | 61542 | 38166 | 5917 | 61875 | 37500 | 6250 | -5625  | 32.13  |
| 100000 | 1.11 | .75 | .2500 | 56250 | 37500 | 6250 | .7646 | .2354 | 62073 | 38228 | 5886 | 62438 | 37500 | 6250 | -6188  | 38.55  |
| 100000 | 1.12 | .75 | .2500 | 56250 | 37500 | 6250 | .7658 | .2342 | 62605 | 38290 | 5855 | 63000 | 37500 | 6250 | -6750  | 45.49  |
| 100000 | 1.13 | .75 | .2500 | 56250 | 37500 | 6250 | .7670 | .2330 | 63137 | 38352 | 5824 | 63563 | 37500 | 6250 | -7313  | 52.93  |
| 100000 | 1.14 | .75 | .2500 | 56250 | 37500 | 6250 | .7683 | .2317 | 63669 | 38413 | 5794 | 64125 | 37500 | 6250 | -7875  | 60.88  |
| 100000 | 1.15 | .75 | .2500 | 56250 | 37500 | 6250 | .7695 | .2305 | 64201 | 38473 | 5764 | 64688 | 37500 | 6250 | -8438  | 69.30  |
| 100000 | 1.16 | .75 | .2500 | 56250 | 37500 | 6250 | .7706 | .2294 | 64734 | 38532 | 5734 | 65250 | 37500 | 6250 | -9000  | 78.20  |
| 100000 | 1.17 | .75 | .2500 | 56250 | 37500 | 6250 | .7718 | .2282 | 65267 | 38591 | 5705 | 65813 | 37500 | 6250 | -9563  | 87.56  |
| 100000 | 1.18 | .75 | .2500 | 56250 | 37500 | 6250 | .7730 | .2270 | 65800 | 38649 | 5675 | 66375 | 37500 | 6250 | -10125 | 97.37  |
| 100000 | 1.19 | .75 | .2500 | 56250 | 37500 | 6250 | .7741 | .2259 | 66334 | 38707 | 5647 | 66938 | 37500 | 6250 | -10688 | 107.62 |
| 100000 | 1.20 | .75 | .2500 | 56250 | 37500 | 6250 | .7753 | .2247 | 66868 | 38764 | 5618 | 67500 | 37500 | 6250 | -11250 | 118.30 |
| 100000 | .80  | .80 | .2000 | 64000 | 32000 | 4000 | .7706 | .2294 | 51787 | 30826 | 4587 | 51200 | 32000 | 4000 | 12800  | 126.55 |
| 100000 | .81  | .80 | .2000 | 64000 | 32000 | 4000 | .7723 | .2277 | 52394 | 30893 | 4554 | 51840 | 32000 | 4000 | 12160  | 112.89 |
| 100000 | .82  | .80 | .2000 | 64000 | 32000 | 4000 | .7740 | .2260 | 53001 | 30958 | 4521 | 52480 | 32000 | 4000 | 11520  | 100.16 |
| 100000 | .83  | .80 | .2000 | 64000 | 32000 | 4000 | .7756 | .2244 | 53608 | 31023 | 4488 | 53120 | 32000 | 4000 | 10880  | 88.33  |



|        |      |     |       |       |       |      |       |       |       |       |      |       |       |      |       |       |
|--------|------|-----|-------|-------|-------|------|-------|-------|-------|-------|------|-------|-------|------|-------|-------|
| 100000 | .84  | .80 | .2000 | 64000 | 32000 | 4000 | .7772 | .2228 | 54216 | 31087 | 4456 | 53760 | 32000 | 4000 | 10240 | 77.36 |
| 100000 | .85  | .80 | .2000 | 64000 | 32000 | 4000 | .7788 | .2212 | 54825 | 31150 | 4425 | 54400 | 32000 | 4000 | 9600  | 67.24 |
| 100000 | .86  | .80 | .2000 | 64000 | 32000 | 4000 | .7803 | .2197 | 55434 | 31213 | 4394 | 55040 | 32000 | 4000 | 8960  | 57.93 |
| 100000 | .87  | .80 | .2000 | 64000 | 32000 | 4000 | .7818 | .2182 | 56043 | 31274 | 4363 | 55680 | 32000 | 4000 | 8320  | 49.41 |
| 100000 | .88  | .80 | .2000 | 64000 | 32000 | 4000 | .7834 | .2166 | 56653 | 31334 | 4333 | 56320 | 32000 | 4000 | 7680  | 41.64 |
| 100000 | .89  | .80 | .2000 | 64000 | 32000 | 4000 | .7849 | .2151 | 57263 | 31394 | 4303 | 56960 | 32000 | 4000 | 7040  | 34.62 |
| 100000 | .90  | .80 | .2000 | 64000 | 32000 | 4000 | .7863 | .2137 | 57874 | 31453 | 4274 | 57600 | 32000 | 4000 | 6400  | 28.31 |
| 100000 | .91  | .80 | .2000 | 64000 | 32000 | 4000 | .7878 | .2122 | 58484 | 31511 | 4244 | 58240 | 32000 | 4000 | 5760  | 22.69 |
| 100000 | .92  | .80 | .2000 | 64000 | 32000 | 4000 | .7892 | .2108 | 59096 | 31568 | 4216 | 58880 | 32000 | 4000 | 5120  | 17.74 |
| 100000 | .93  | .80 | .2000 | 64000 | 32000 | 4000 | .7906 | .2094 | 59708 | 31625 | 4188 | 59520 | 32000 | 4000 | 4480  | 13.45 |
| 100000 | .94  | .80 | .2000 | 64000 | 32000 | 4000 | .7920 | .2080 | 60320 | 31681 | 4160 | 60160 | 32000 | 4000 | 3840  | 9.78  |
| 100000 | .95  | .80 | .2000 | 64000 | 32000 | 4000 | .7934 | .2066 | 60932 | 31736 | 4132 | 60800 | 32000 | 4000 | 3200  | 6.72  |
| 100000 | .96  | .80 | .2000 | 64000 | 32000 | 4000 | .7947 | .2053 | 61545 | 31790 | 4105 | 61440 | 32000 | 4000 | 2560  | 4.26  |
| 100000 | .97  | .80 | .2000 | 64000 | 32000 | 4000 | .7961 | .2039 | 62158 | 31843 | 4078 | 62080 | 32000 | 4000 | 1920  | 2.37  |
| 100000 | .98  | .80 | .2000 | 64000 | 32000 | 4000 | .7974 | .2026 | 62772 | 31896 | 4052 | 62720 | 32000 | 4000 | 1280  | 1.04  |
| 100000 | .99  | .80 | .2000 | 64000 | 32000 | 4000 | .7987 | .2013 | 63386 | 31948 | 4026 | 63360 | 32000 | 4000 | 640   | .26   |
| 100000 | 1.00 | .80 | .2000 | 64000 | 32000 | 4000 | .8000 | .2000 | 64000 | 32000 | 4000 | 64000 | 32000 | 4000 | 0     | .00   |
| 100000 | 1.01 | .80 | .2000 | 64000 | 32000 | 4000 | .8013 | .1987 | 64615 | 32051 | 3975 | 64640 | 32000 | 4000 | -640  | .25   |
| 100000 | 1.02 | .80 | .2000 | 64000 | 32000 | 4000 | .8025 | .1975 | 65229 | 32101 | 3949 | 65280 | 32000 | 4000 | -1280 | 1.00  |
| 100000 | 1.03 | .80 | .2000 | 64000 | 32000 | 4000 | .8038 | .1962 | 65845 | 32151 | 3925 | 65920 | 32000 | 4000 | -1920 | 2.24  |
| 100000 | 1.04 | .80 | .2000 | 64000 | 32000 | 4000 | .8050 | .1950 | 66460 | 32200 | 3900 | 66560 | 32000 | 4000 | -2560 | 3.94  |
| 100000 | 1.05 | .80 | .2000 | 64000 | 32000 | 4000 | .8062 | .1938 | 67076 | 32248 | 3876 | 67200 | 32000 | 4000 | -3200 | 6.11  |
| 100000 | 1.06 | .80 | .2000 | 64000 | 32000 | 4000 | .8074 | .1926 | 67692 | 32296 | 3852 | 67840 | 32000 | 4000 | -3840 | 8.71  |
| 100000 | 1.07 | .80 | .2000 | 64000 | 32000 | 4000 | .8086 | .1914 | 68308 | 32343 | 3828 | 68480 | 32000 | 4000 | -4480 | 11.75 |
| 100000 | 1.08 | .80 | .2000 | 64000 | 32000 | 4000 | .8097 | .1903 | 68925 | 32390 | 3805 | 69120 | 32000 | 4000 | -5120 | 15.21 |
| 100000 | 1.09 | .80 | .2000 | 64000 | 32000 | 4000 | .8109 | .1891 | 69542 | 32436 | 3782 | 69760 | 32000 | 4000 | -5760 | 19.08 |
| 100000 | 1.10 | .80 | .2000 | 64000 | 32000 | 4000 | .8120 | .1880 | 70159 | 32481 | 3759 | 70400 | 32000 | 4000 | -6400 | 23.35 |
| 100000 | 1.11 | .80 | .2000 | 64000 | 32000 | 4000 | .8132 | .1868 | 70777 | 32526 | 3737 | 71040 | 32000 | 4000 | -7040 | 28.01 |
| 100000 | 1.12 | .80 | .2000 | 64000 | 32000 | 4000 | .8143 | .1857 | 71395 | 32571 | 3715 | 71680 | 32000 | 4000 | -7680 | 33.05 |
| 100000 | 1.13 | .80 | .2000 | 64000 | 32000 | 4000 | .8154 | .1846 | 72013 | 32614 | 3693 | 72320 | 32000 | 4000 | -8320 | 38.45 |
| 100000 | 1.14 | .80 | .2000 | 64000 | 32000 | 4000 | .8164 | .1836 | 72631 | 32658 | 3671 | 72960 | 32000 | 4000 | -8960 | 44.21 |
| 100000 | 1.15 | .80 | .2000 | 64000 | 32000 | 4000 | .8175 | .1825 | 73250 | 32701 | 3650 | 73600 | 32000 | 4000 | -9600 | 50.33 |
| 100000 | 1.16 | .80 | .2000 | 64000 | 32000 | 4000 | .8186 | .1814 | 73868 | 32743 | 3628 | 74240 | 32000 | 4000 | -     | 56.78 |

|        |      |     |       |       |       |      |       |       |       |       |      |       |       |      |        |       |
|--------|------|-----|-------|-------|-------|------|-------|-------|-------|-------|------|-------|-------|------|--------|-------|
|        |      |     |       |       |       |      |       |       |       |       |      |       |       |      | 10240  |       |
| 100000 | 1.17 | .80 | .2000 | 64000 | 32000 | 4000 | .8196 | .1804 | 74488 | 32785 | 3608 | 74880 | 32000 | 4000 | -10880 | 63.57 |
| 100000 | 1.18 | .80 | .2000 | 64000 | 32000 | 4000 | .8207 | .1793 | 75107 | 32826 | 3587 | 75520 | 32000 | 4000 | -11520 | 70.68 |
| 100000 | 1.19 | .80 | .2000 | 64000 | 32000 | 4000 | .8217 | .1783 | 75726 | 32867 | 3566 | 76160 | 32000 | 4000 | -12160 | 78.11 |
| 100000 | 1.20 | .80 | .2000 | 64000 | 32000 | 4000 | .8227 | .1773 | 76346 | 32908 | 3546 | 76800 | 32000 | 4000 | -12800 | 85.84 |
| 100000 | .80  | .85 | .1500 | 72250 | 25500 | 2250 | .8247 | .1753 | 58180 | 24740 | 2630 | 57800 | 25500 | 2250 | 14450  | 80.75 |
| 100000 | .81  | .85 | .1500 | 72250 | 25500 | 2250 | .8261 | .1739 | 58881 | 24784 | 2608 | 58523 | 25500 | 2250 | 13728  | 72.01 |
| 100000 | .82  | .85 | .1500 | 72250 | 25500 | 2250 | .8276 | .1724 | 59581 | 24827 | 2586 | 59245 | 25500 | 2250 | 13005  | 63.87 |
| 100000 | .83  | .85 | .1500 | 72250 | 25500 | 2250 | .8290 | .1710 | 60283 | 24870 | 2565 | 59968 | 25500 | 2250 | 12283  | 56.31 |
| 100000 | .84  | .85 | .1500 | 72250 | 25500 | 2250 | .8304 | .1696 | 60984 | 24912 | 2544 | 60690 | 25500 | 2250 | 11560  | 49.30 |
| 100000 | .85  | .85 | .1500 | 72250 | 25500 | 2250 | .8318 | .1682 | 61686 | 24953 | 2523 | 61413 | 25500 | 2250 | 10838  | 42.84 |
| 100000 | .86  | .85 | .1500 | 72250 | 25500 | 2250 | .8331 | .1669 | 62388 | 24994 | 2503 | 62135 | 25500 | 2250 | 10115  | 36.90 |
| 100000 | .87  | .85 | .1500 | 72250 | 25500 | 2250 | .8345 | .1655 | 63091 | 25034 | 2483 | 62858 | 25500 | 2250 | 9393   | 31.46 |
| 100000 | .88  | .85 | .1500 | 72250 | 25500 | 2250 | .8358 | .1642 | 63794 | 25073 | 2464 | 63580 | 25500 | 2250 | 8670   | 26.51 |
| 100000 | .89  | .85 | .1500 | 72250 | 25500 | 2250 | .8370 | .1630 | 64497 | 25111 | 2444 | 64303 | 25500 | 2250 | 7948   | 22.03 |
| 100000 | .90  | .85 | .1500 | 72250 | 25500 | 2250 | .8383 | .1617 | 65200 | 25150 | 2425 | 65025 | 25500 | 2250 | 7225   | 18.01 |
| 100000 | .91  | .85 | .1500 | 72250 | 25500 | 2250 | .8396 | .1604 | 65904 | 25187 | 2406 | 65748 | 25500 | 2250 | 6503   | 14.44 |
| 100000 | .92  | .85 | .1500 | 72250 | 25500 | 2250 | .8408 | .1592 | 66608 | 25224 | 2388 | 66470 | 25500 | 2250 | 5780   | 11.29 |
| 100000 | .93  | .85 | .1500 | 72250 | 25500 | 2250 | .8420 | .1580 | 67312 | 25260 | 2370 | 67193 | 25500 | 2250 | 5058   | 8.55  |
| 100000 | .94  | .85 | .1500 | 72250 | 25500 | 2250 | .8432 | .1568 | 68017 | 25296 | 2352 | 67915 | 25500 | 2250 | 4335   | 6.22  |
| 100000 | .95  | .85 | .1500 | 72250 | 25500 | 2250 | .8444 | .1556 | 68722 | 25331 | 2334 | 68638 | 25500 | 2250 | 3613   | 4.27  |
| 100000 | .96  | .85 | .1500 | 72250 | 25500 | 2250 | .8455 | .1545 | 69427 | 25366 | 2317 | 69360 | 25500 | 2250 | 2890   | 2.71  |
| 100000 | .97  | .85 | .1500 | 72250 | 25500 | 2250 | .8467 | .1533 | 70132 | 25400 | 2300 | 70083 | 25500 | 2250 | 2168   | 1.51  |
| 100000 | .98  | .85 | .1500 | 72250 | 25500 | 2250 | .8478 | .1522 | 70838 | 25434 | 2283 | 70805 | 25500 | 2250 | 1445   | .66   |
| 100000 | .99  | .85 | .1500 | 72250 | 25500 | 2250 | .8489 | .1511 | 71544 | 25467 | 2266 | 71528 | 25500 | 2250 | 723    | .16   |
| 100000 | 1.00 | .85 | .1500 | 72250 | 25500 | 2250 | .8500 | .1500 | 72250 | 25500 | 2250 | 72250 | 25500 | 2250 | 0      | .00   |
| 100000 | 1.01 | .85 | .1500 | 72250 | 25500 | 2250 | .8511 | .1489 | 72956 | 25532 | 2234 | 72973 | 25500 | 2250 | -723   | .16   |
| 100000 | 1.02 | .85 | .1500 | 72250 | 25500 | 2250 | .8521 | .1479 | 73663 | 25564 | 2218 | 73695 | 25500 | 2250 | -1445  | .64   |
| 100000 | 1.03 | .85 | .1500 | 72250 | 25500 | 2250 | .8532 | .1468 | 74370 | 25595 | 2202 | 74418 | 25500 | 2250 | -2168  | 1.42  |

|        |      |     |       |       |       |      |       |       |       |       |      |       |       |      |        |       |
|--------|------|-----|-------|-------|-------|------|-------|-------|-------|-------|------|-------|-------|------|--------|-------|
| 100000 | 1.04 | .85 | .1500 | 72250 | 25500 | 2250 | .8542 | .1458 | 75077 | 25626 | 2187 | 75140 | 25500 | 2250 | -2890  | 2.50  |
| 100000 | 1.05 | .85 | .1500 | 72250 | 25500 | 2250 | .8552 | .1448 | 75784 | 25657 | 2172 | 75863 | 25500 | 2250 | -3613  | 3.87  |
| 100000 | 1.06 | .85 | .1500 | 72250 | 25500 | 2250 | .8562 | .1438 | 76492 | 25687 | 2157 | 76585 | 25500 | 2250 | -4335  | 5.53  |
| 100000 | 1.07 | .85 | .1500 | 72250 | 25500 | 2250 | .8572 | .1428 | 77199 | 25717 | 2142 | 77308 | 25500 | 2250 | -5058  | 7.45  |
| 100000 | 1.08 | .85 | .1500 | 72250 | 25500 | 2250 | .8582 | .1418 | 77907 | 25746 | 2127 | 78030 | 25500 | 2250 | -5780  | 9.65  |
| 100000 | 1.09 | .85 | .1500 | 72250 | 25500 | 2250 | .8592 | .1408 | 78615 | 25775 | 2113 | 78753 | 25500 | 2250 | -6503  | 12.10 |
| 100000 | 1.10 | .85 | .1500 | 72250 | 25500 | 2250 | .8601 | .1399 | 79323 | 25803 | 2098 | 79475 | 25500 | 2250 | -7225  | 14.81 |
| 100000 | 1.11 | .85 | .1500 | 72250 | 25500 | 2250 | .8610 | .1390 | 80032 | 25831 | 2084 | 80198 | 25500 | 2250 | -7948  | 17.76 |
| 100000 | 1.12 | .85 | .1500 | 72250 | 25500 | 2250 | .8620 | .1380 | 80740 | 25859 | 2070 | 80920 | 25500 | 2250 | -8670  | 20.95 |
| 100000 | 1.13 | .85 | .1500 | 72250 | 25500 | 2250 | .8629 | .1371 | 81449 | 25886 | 2057 | 81643 | 25500 | 2250 | -9393  | 24.37 |
| 100000 | 1.14 | .85 | .1500 | 72250 | 25500 | 2250 | .8638 | .1362 | 82158 | 25913 | 2043 | 82365 | 25500 | 2250 | -10115 | 28.02 |
| 100000 | 1.15 | .85 | .1500 | 72250 | 25500 | 2250 | .8647 | .1353 | 82867 | 25940 | 2030 | 83088 | 25500 | 2250 | -10838 | 31.89 |
| 100000 | 1.16 | .85 | .1500 | 72250 | 25500 | 2250 | .8655 | .1345 | 83577 | 25966 | 2017 | 83810 | 25500 | 2250 | -11560 | 35.98 |
| 100000 | 1.17 | .85 | .1500 | 72250 | 25500 | 2250 | .8664 | .1336 | 84286 | 25992 | 2004 | 84533 | 25500 | 2250 | -12283 | 40.27 |
| 100000 | 1.18 | .85 | .1500 | 72250 | 25500 | 2250 | .8673 | .1327 | 84996 | 26018 | 1991 | 85255 | 25500 | 2250 | -13005 | 44.77 |
| 100000 | 1.19 | .85 | .1500 | 72250 | 25500 | 2250 | .8681 | .1319 | 85706 | 26043 | 1978 | 85978 | 25500 | 2250 | -13728 | 49.47 |
| 100000 | 1.20 | .85 | .1500 | 72250 | 25500 | 2250 | .8689 | .1311 | 86416 | 26068 | 1966 | 86700 | 25500 | 2250 | -14450 | 54.37 |
| 100000 | .80  | .90 | .1000 | 81000 | 18000 | 1000 | .8807 | .1193 | 64993 | 17613 | 1193 | 64800 | 18000 | 1000 | 16200  | 40.38 |
| 100000 | .81  | .90 | .1000 | 81000 | 18000 | 1000 | .8818 | .1182 | 65792 | 17636 | 1182 | 65610 | 18000 | 1000 | 15390  | 36.00 |
| 100000 | .82  | .90 | .1000 | 81000 | 18000 | 1000 | .8829 | .1171 | 66591 | 17659 | 1171 | 66420 | 18000 | 1000 | 14580  | 31.92 |
| 100000 | .83  | .90 | .1000 | 81000 | 18000 | 1000 | .8840 | .1160 | 67390 | 17681 | 1160 | 67230 | 18000 | 1000 | 13770  | 28.14 |
| 100000 | .84  | .90 | .1000 | 81000 | 18000 | 1000 | .8851 | .1149 | 68189 | 17702 | 1149 | 68040 | 18000 | 1000 | 12960  | 24.63 |
| 100000 | .85  | .90 | .1000 | 81000 | 18000 | 1000 | .8862 | .1138 | 68988 | 17723 | 1138 | 68850 | 18000 | 1000 | 12150  | 21.40 |
| 100000 | .86  | .90 | .1000 | 81000 | 18000 | 1000 | .8872 | .1128 | 69788 | 17744 | 1128 | 69660 | 18000 | 1000 | 11340  | 18.43 |
| 100000 | .87  | .90 | .1000 | 81000 | 18000 | 1000 | .8882 | .1118 | 70588 | 17765 | 1118 | 70470 | 18000 | 1000 | 10530  | 15.71 |
| 100000 | .88  | .90 | .1000 | 81000 | 18000 | 1000 | .8892 | .1108 | 71388 | 17785 | 1108 | 71280 | 18000 | 1000 | 9720   | 13.23 |

|        |      |     |       |       |       |      |       |       |       |       |      |       |       |      |        |       |
|--------|------|-----|-------|-------|-------|------|-------|-------|-------|-------|------|-------|-------|------|--------|-------|
| 100000 | .89  | .90 | .1000 | 81000 | 18000 | 1000 | .8902 | .1098 | 72188 | 17804 | 1098 | 72090 | 18000 | 1000 | 8910   | 11.00 |
| 100000 | .90  | .90 | .1000 | 81000 | 18000 | 1000 | .8912 | .1088 | 72988 | 17824 | 1088 | 72900 | 18000 | 1000 | 8100   | 8.99  |
| 100000 | .91  | .90 | .1000 | 81000 | 18000 | 1000 | .8921 | .1079 | 73789 | 17843 | 1079 | 73710 | 18000 | 1000 | 7290   | 7.20  |
| 100000 | .92  | .90 | .1000 | 81000 | 18000 | 1000 | .8931 | .1069 | 74589 | 17861 | 1069 | 74520 | 18000 | 1000 | 6480   | 5.63  |
| 100000 | .93  | .90 | .1000 | 81000 | 18000 | 1000 | .8940 | .1060 | 75390 | 17880 | 1060 | 75330 | 18000 | 1000 | 5670   | 4.26  |
| 100000 | .94  | .90 | .1000 | 81000 | 18000 | 1000 | .8949 | .1051 | 76191 | 17898 | 1051 | 76140 | 18000 | 1000 | 4860   | 3.10  |
| 100000 | .95  | .90 | .1000 | 81000 | 18000 | 1000 | .8958 | .1042 | 76992 | 17916 | 1042 | 76950 | 18000 | 1000 | 4050   | 2.13  |
| 100000 | .96  | .90 | .1000 | 81000 | 18000 | 1000 | .8967 | .1033 | 77793 | 17933 | 1033 | 77760 | 18000 | 1000 | 3240   | 1.35  |
| 100000 | .97  | .90 | .1000 | 81000 | 18000 | 1000 | .8975 | .1025 | 78595 | 17950 | 1025 | 78570 | 18000 | 1000 | 2430   | .75   |
| 100000 | .98  | .90 | .1000 | 81000 | 18000 | 1000 | .8984 | .1016 | 79396 | 17967 | 1016 | 79380 | 18000 | 1000 | 1620   | .33   |
| 100000 | .99  | .90 | .1000 | 81000 | 18000 | 1000 | .8992 | .1008 | 80198 | 17984 | 1008 | 80190 | 18000 | 1000 | 810    | .08   |
| 100000 | 1.00 | .90 | .1000 | 81000 | 18000 | 1000 | .9000 | .1000 | 81000 | 18000 | 1000 | 81000 | 18000 | 1000 | 0      | .00   |
| 100000 | 1.01 | .90 | .1000 | 81000 | 18000 | 1000 | .9008 | .0992 | 81802 | 18016 | 992  | 81810 | 18000 | 1000 | -810   | .08   |
| 100000 | 1.02 | .90 | .1000 | 81000 | 18000 | 1000 | .9016 | .0984 | 82604 | 18032 | 984  | 82620 | 18000 | 1000 | -1620  | .32   |
| 100000 | 1.03 | .90 | .1000 | 81000 | 18000 | 1000 | .9024 | .0976 | 83406 | 18047 | 976  | 83430 | 18000 | 1000 | -2430  | .71   |
| 100000 | 1.04 | .90 | .1000 | 81000 | 18000 | 1000 | .9031 | .0969 | 84209 | 18063 | 969  | 84240 | 18000 | 1000 | -3240  | 1.25  |
| 100000 | 1.05 | .90 | .1000 | 81000 | 18000 | 1000 | .9039 | .0961 | 85011 | 18078 | 961  | 85050 | 18000 | 1000 | -4050  | 1.93  |
| 100000 | 1.06 | .90 | .1000 | 81000 | 18000 | 1000 | .9046 | .0954 | 85814 | 18093 | 954  | 85860 | 18000 | 1000 | -4860  | 2.75  |
| 100000 | 1.07 | .90 | .1000 | 81000 | 18000 | 1000 | .9054 | .0946 | 86616 | 18107 | 946  | 86670 | 18000 | 1000 | -5670  | 3.71  |
| 100000 | 1.08 | .90 | .1000 | 81000 | 18000 | 1000 | .9061 | .0939 | 87419 | 18122 | 939  | 87480 | 18000 | 1000 | -6480  | 4.80  |
| 100000 | 1.09 | .90 | .1000 | 81000 | 18000 | 1000 | .9068 | .0932 | 88222 | 18136 | 932  | 88290 | 18000 | 1000 | -7290  | 6.02  |
| 100000 | 1.10 | .90 | .1000 | 81000 | 18000 | 1000 | .9075 | .0925 | 89025 | 18150 | 925  | 89100 | 18000 | 1000 | -8100  | 7.37  |
| 100000 | 1.11 | .90 | .1000 | 81000 | 18000 | 1000 | .9082 | .0918 | 89828 | 18164 | 918  | 89910 | 18000 | 1000 | -8910  | 8.84  |
| 100000 | 1.12 | .90 | .1000 | 81000 | 18000 | 1000 | .9089 | .0911 | 90631 | 18177 | 911  | 90720 | 18000 | 1000 | -9720  | 10.42 |
| 100000 | 1.13 | .90 | .1000 | 81000 | 18000 | 1000 | .9095 | .0905 | 91435 | 18191 | 905  | 91530 | 18000 | 1000 | -10530 | 12.13 |
| 100000 | 1.14 | .90 | .1000 | 81000 | 18000 | 1000 | .9102 | .0898 | 92238 | 18204 | 898  | 92340 | 18000 | 1000 | -11340 | 13.94 |
| 100000 | 1.15 | .90 | .1000 | 81000 | 18000 | 1000 | .9108 | .0892 | 93042 | 18217 | 892  | 93150 | 18000 | 1000 | -12150 | 15.87 |
| 100000 | 1.16 | .90 | .1000 | 81000 | 18000 | 1000 | .9115 | .0885 | 93845 | 18229 | 885  | 93960 | 18000 | 1000 | -12960 | 17.90 |
| 100000 | 1.17 | .90 | .1000 | 81000 | 18000 | 1000 | .9121 | .0879 | 94649 | 18242 | 879  | 94770 | 18000 | 1000 | -      | 20.03 |

|        |      |     |       |       |       |      |       |       |       |       |     |       |       |      |        |       |
|--------|------|-----|-------|-------|-------|------|-------|-------|-------|-------|-----|-------|-------|------|--------|-------|
|        |      |     |       |       |       |      |       |       |       |       |     |       |       |      | 13770  |       |
| 100000 | 1.18 | .90 | .1000 | 81000 | 18000 | 1000 | .9127 | .0873 | 95453 | 18254 | 873 | 95580 | 18000 | 1000 | -14580 | 22.27 |
| 100000 | 1.19 | .90 | .1000 | 81000 | 18000 | 1000 | .9133 | .0867 | 96257 | 18267 | 867 | 96390 | 18000 | 1000 | -15390 | 24.61 |
| 100000 | 1.20 | .90 | .1000 | 81000 | 18000 | 1000 | .9139 | .0861 | 97061 | 18279 | 861 | 97200 | 18000 | 1000 | -16200 | 27.04 |
| 100000 | .80  | .95 | .0500 | 90250 | 9500  | 250  | .9390 | .0610 | 72255 | 9390  | 305 | 72200 | 9500  | 250  | 18050  | 11.27 |
| 100000 | .81  | .95 | .0500 | 90250 | 9500  | 250  | .9397 | .0603 | 73154 | 9397  | 302 | 73103 | 9500  | 250  | 17148  | 10.05 |
| 100000 | .82  | .95 | .0500 | 90250 | 9500  | 250  | .9403 | .0597 | 74053 | 9403  | 298 | 74005 | 9500  | 250  | 16245  | 8.91  |
| 100000 | .83  | .95 | .0500 | 90250 | 9500  | 250  | .9409 | .0591 | 74953 | 9409  | 295 | 74908 | 9500  | 250  | 15343  | 7.85  |
| 100000 | .84  | .95 | .0500 | 90250 | 9500  | 250  | .9416 | .0584 | 75852 | 9416  | 292 | 75810 | 9500  | 250  | 14440  | 6.87  |
| 100000 | .85  | .95 | .0500 | 90250 | 9500  | 250  | .9422 | .0578 | 76752 | 9422  | 289 | 76713 | 9500  | 250  | 13538  | 5.97  |
| 100000 | .86  | .95 | .0500 | 90250 | 9500  | 250  | .9428 | .0572 | 77651 | 9428  | 286 | 77615 | 9500  | 250  | 12635  | 5.14  |
| 100000 | .87  | .95 | .0500 | 90250 | 9500  | 250  | .9434 | .0566 | 78551 | 9434  | 283 | 78518 | 9500  | 250  | 11733  | 4.38  |
| 100000 | .88  | .95 | .0500 | 90250 | 9500  | 250  | .9439 | .0561 | 79450 | 9439  | 280 | 79420 | 9500  | 250  | 10830  | 3.69  |
| 100000 | .89  | .95 | .0500 | 90250 | 9500  | 250  | .9445 | .0555 | 80350 | 9445  | 278 | 80323 | 9500  | 250  | 9928   | 3.07  |
| 100000 | .90  | .95 | .0500 | 90250 | 9500  | 250  | .9450 | .0550 | 81250 | 9450  | 275 | 81225 | 9500  | 250  | 9025   | 2.51  |
| 100000 | .91  | .95 | .0500 | 90250 | 9500  | 250  | .9456 | .0544 | 82150 | 9456  | 272 | 82128 | 9500  | 250  | 8123   | 2.01  |
| 100000 | .92  | .95 | .0500 | 90250 | 9500  | 250  | .9461 | .0539 | 83049 | 9461  | 269 | 83030 | 9500  | 250  | 7220   | 1.57  |
| 100000 | .93  | .95 | .0500 | 90250 | 9500  | 250  | .9466 | .0534 | 83949 | 9466  | 267 | 83933 | 9500  | 250  | 6318   | 1.19  |
| 100000 | .94  | .95 | .0500 | 90250 | 9500  | 250  | .9471 | .0529 | 84849 | 9471  | 264 | 84835 | 9500  | 250  | 5415   | .86   |
| 100000 | .95  | .95 | .0500 | 90250 | 9500  | 250  | .9476 | .0524 | 85749 | 9476  | 262 | 85738 | 9500  | 250  | 4513   | .59   |
| 100000 | .96  | .95 | .0500 | 90250 | 9500  | 250  | .9481 | .0519 | 86649 | 9481  | 259 | 86640 | 9500  | 250  | 3610   | .38   |
| 100000 | .97  | .95 | .0500 | 90250 | 9500  | 250  | .9486 | .0514 | 87549 | 9486  | 257 | 87543 | 9500  | 250  | 2708   | .21   |
| 100000 | .98  | .95 | .0500 | 90250 | 9500  | 250  | .9491 | .0509 | 88450 | 9491  | 255 | 88445 | 9500  | 250  | 1805   | .09   |
| 100000 | .99  | .95 | .0500 | 90250 | 9500  | 250  | .9495 | .0505 | 89350 | 9495  | 252 | 89348 | 9500  | 250  | 903    | .02   |
| 100000 | 1.00 | .95 | .0500 | 90250 | 9500  | 250  | .9500 | .0500 | 90250 | 9500  | 250 | 90250 | 9500  | 250  | 0      | .00   |
| 100000 | 1.01 | .95 | .0500 | 90250 | 9500  | 250  | .9504 | .0496 | 91150 | 9504  | 248 | 91153 | 9500  | 250  | -903   | .02   |
| 100000 | 1.02 | .95 | .0500 | 90250 | 9500  | 250  | .9509 | .0491 | 92051 | 9509  | 246 | 92055 | 9500  | 250  | -1805  | .09   |
| 100000 | 1.03 | .95 | .0500 | 90250 | 9500  | 250  | .9513 | .0487 | 92951 | 9513  | 243 | 92958 | 9500  | 250  | -2708  | .20   |
| 100000 | 1.04 | .95 | .0500 | 90250 | 9500  | 250  | .9517 | .0483 | 93851 | 9517  | 241 | 93860 | 9500  | 250  | -3610  | .35   |
| 100000 | 1.05 | .95 | .0500 | 90250 | 9500  | 250  | .9522 | .0478 | 94752 | 9522  | 239 | 94763 | 9500  | 250  | -4513  | .54   |

|        |      |      |       |        |      |     |        |       |        |      |     |        |      |     |        |      |
|--------|------|------|-------|--------|------|-----|--------|-------|--------|------|-----|--------|------|-----|--------|------|
| 100000 | 1.06 | .95  | .0500 | 90250  | 9500 | 250 | .9526  | .0474 | 95652  | 9526 | 237 | 95665  | 9500 | 250 | -5415  | .77  |
| 100000 | 1.07 | .95  | .0500 | 90250  | 9500 | 250 | .9530  | .0470 | 96553  | 9530 | 235 | 96568  | 9500 | 250 | -6318  | 1.03 |
| 100000 | 1.08 | .95  | .0500 | 90250  | 9500 | 250 | .9534  | .0466 | 97453  | 9534 | 233 | 97470  | 9500 | 250 | -7220  | 1.34 |
| 100000 | 1.09 | .95  | .0500 | 90250  | 9500 | 250 | .9538  | .0462 | 98354  | 9538 | 231 | 98373  | 9500 | 250 | -8123  | 1.68 |
| 100000 | 1.10 | .95  | .0500 | 90250  | 9500 | 250 | .9541  | .0459 | 99254  | 9541 | 229 | 99275  | 9500 | 250 | -9025  | 2.05 |
| 100000 | 1.11 | .95  | .0500 | 90250  | 9500 | 250 | .9545  | .0455 | 100155 | 9545 | 227 | 100178 | 9500 | 250 | -9928  | 2.46 |
| 100000 | 1.12 | .95  | .0500 | 90250  | 9500 | 250 | .9549  | .0451 | 101056 | 9549 | 226 | 101080 | 9500 | 250 | -10830 | 2.90 |
| 100000 | 1.13 | .95  | .0500 | 90250  | 9500 | 250 | .9553  | .0447 | 101956 | 9553 | 224 | 101983 | 9500 | 250 | -11733 | 3.38 |
| 100000 | 1.14 | .95  | .0500 | 90250  | 9500 | 250 | .9556  | .0444 | 102857 | 9556 | 222 | 102885 | 9500 | 250 | -12635 | 3.88 |
| 100000 | 1.15 | .95  | .0500 | 90250  | 9500 | 250 | .9560  | .0440 | 103758 | 9560 | 220 | 103788 | 9500 | 250 | -13538 | 4.42 |
| 100000 | 1.16 | .95  | .0500 | 90250  | 9500 | 250 | .9563  | .0437 | 104658 | 9563 | 218 | 104690 | 9500 | 250 | -14440 | 4.98 |
| 100000 | 1.17 | .95  | .0500 | 90250  | 9500 | 250 | .9567  | .0433 | 105559 | 9567 | 217 | 105593 | 9500 | 250 | -15343 | 5.57 |
| 100000 | 1.18 | .95  | .0500 | 90250  | 9500 | 250 | .9570  | .0430 | 106460 | 9570 | 215 | 106495 | 9500 | 250 | -16245 | 6.20 |
| 100000 | 1.19 | .95  | .0500 | 90250  | 9500 | 250 | .9573  | .0427 | 107361 | 9573 | 213 | 107398 | 9500 | 250 | -17148 | 6.85 |
| 100000 | 1.20 | .95  | .0500 | 90250  | 9500 | 250 | .9576  | .0424 | 108262 | 9576 | 212 | 108300 | 9500 | 250 | -18050 | 7.52 |
| 100000 | .80  | 1.00 | .0000 | 100000 | 0    | 0   | 1.0000 | .0000 | 80000  | 0    | 0   | 80000  | 0    | 0   | 20000  | 7.52 |
| 100000 | .81  | 1.00 | .0000 | 100000 | 0    | 0   | 1.0000 | .0000 | 81000  | 0    | 0   | 81000  | 0    | 0   | 19000  | 7.52 |
| 100000 | .82  | 1.00 | .0000 | 100000 | 0    | 0   | 1.0000 | .0000 | 82000  | 0    | 0   | 82000  | 0    | 0   | 18000  | 7.52 |
| 100000 | .83  | 1.00 | .0000 | 100000 | 0    | 0   | 1.0000 | .0000 | 83000  | 0    | 0   | 83000  | 0    | 0   | 17000  | 7.52 |
| 100000 | .84  | 1.00 | .0000 | 100000 | 0    | 0   | 1.0000 | .0000 | 84000  | 0    | 0   | 84000  | 0    | 0   | 16000  | 7.52 |

|        |      |      |       |        |   |   |            |       |        |   |   |        |   |   |       |      |
|--------|------|------|-------|--------|---|---|------------|-------|--------|---|---|--------|---|---|-------|------|
| 100000 | .85  | 1.00 | .0000 | 100000 | 0 | 0 | 1.000<br>0 | .0000 | 85000  | 0 | 0 | 85000  | 0 | 0 | 15000 | 7.52 |
| 100000 | .86  | 1.00 | .0000 | 100000 | 0 | 0 | 1.000<br>0 | .0000 | 86000  | 0 | 0 | 86000  | 0 | 0 | 14000 | 7.52 |
| 100000 | .87  | 1.00 | .0000 | 100000 | 0 | 0 | 1.000<br>0 | .0000 | 87000  | 0 | 0 | 87000  | 0 | 0 | 13000 | 7.52 |
| 100000 | .88  | 1.00 | .0000 | 100000 | 0 | 0 | 1.000<br>0 | .0000 | 88000  | 0 | 0 | 88000  | 0 | 0 | 12000 | 7.52 |
| 100000 | .89  | 1.00 | .0000 | 100000 | 0 | 0 | 1.000<br>0 | .0000 | 89000  | 0 | 0 | 89000  | 0 | 0 | 11000 | 7.52 |
| 100000 | .90  | 1.00 | .0000 | 100000 | 0 | 0 | 1.000<br>0 | .0000 | 90000  | 0 | 0 | 90000  | 0 | 0 | 10000 | 7.52 |
| 100000 | .91  | 1.00 | .0000 | 100000 | 0 | 0 | 1.000<br>0 | .0000 | 91000  | 0 | 0 | 91000  | 0 | 0 | 9000  | 7.52 |
| 100000 | .92  | 1.00 | .0000 | 100000 | 0 | 0 | 1.000<br>0 | .0000 | 92000  | 0 | 0 | 92000  | 0 | 0 | 8000  | 7.52 |
| 100000 | .93  | 1.00 | .0000 | 100000 | 0 | 0 | 1.000<br>0 | .0000 | 93000  | 0 | 0 | 93000  | 0 | 0 | 7000  | 7.52 |
| 100000 | .94  | 1.00 | .0000 | 100000 | 0 | 0 | 1.000<br>0 | .0000 | 94000  | 0 | 0 | 94000  | 0 | 0 | 6000  | 7.52 |
| 100000 | .95  | 1.00 | .0000 | 100000 | 0 | 0 | 1.000<br>0 | .0000 | 95000  | 0 | 0 | 95000  | 0 | 0 | 5000  | 7.52 |
| 100000 | .96  | 1.00 | .0000 | 100000 | 0 | 0 | 1.000<br>0 | .0000 | 96000  | 0 | 0 | 96000  | 0 | 0 | 4000  | 7.52 |
| 100000 | .97  | 1.00 | .0000 | 100000 | 0 | 0 | 1.000<br>0 | .0000 | 97000  | 0 | 0 | 97000  | 0 | 0 | 3000  | 7.52 |
| 100000 | .98  | 1.00 | .0000 | 100000 | 0 | 0 | 1.000<br>0 | .0000 | 98000  | 0 | 0 | 98000  | 0 | 0 | 2000  | 7.52 |
| 100000 | .99  | 1.00 | .0000 | 100000 | 0 | 0 | 1.000<br>0 | .0000 | 99000  | 0 | 0 | 99000  | 0 | 0 | 1000  | 7.52 |
| 100000 | 1.00 | 1.00 | .0000 | 100000 | 0 | 0 | 1.000<br>0 | .0000 | 100000 | 0 | 0 | 100000 | 0 | 0 | 0     | 7.52 |
| 100000 | 1.01 | 1.00 | .0000 | 100000 | 0 | 0 | 1.000<br>0 | .0000 | 101000 | 0 | 0 | 101000 | 0 | 0 | -1000 | 7.52 |

|        |      |      |       |        |   |   |            |       |        |   |   |        |   |   |            |      |
|--------|------|------|-------|--------|---|---|------------|-------|--------|---|---|--------|---|---|------------|------|
| 100000 | 1.02 | 1.00 | .0000 | 100000 | 0 | 0 | 1.000<br>0 | .0000 | 102000 | 0 | 0 | 102000 | 0 | 0 | -2000      | 7.52 |
| 100000 | 1.03 | 1.00 | .0000 | 100000 | 0 | 0 | 1.000<br>0 | .0000 | 103000 | 0 | 0 | 103000 | 0 | 0 | -3000      | 7.52 |
| 100000 | 1.04 | 1.00 | .0000 | 100000 | 0 | 0 | 1.000<br>0 | .0000 | 104000 | 0 | 0 | 104000 | 0 | 0 | -4000      | 7.52 |
| 100000 | 1.05 | 1.00 | .0000 | 100000 | 0 | 0 | 1.000<br>0 | .0000 | 105000 | 0 | 0 | 105000 | 0 | 0 | -5000      | 7.52 |
| 100000 | 1.06 | 1.00 | .0000 | 100000 | 0 | 0 | 1.000<br>0 | .0000 | 106000 | 0 | 0 | 106000 | 0 | 0 | -6000      | 7.52 |
| 100000 | 1.07 | 1.00 | .0000 | 100000 | 0 | 0 | 1.000<br>0 | .0000 | 107000 | 0 | 0 | 107000 | 0 | 0 | -7000      | 7.52 |
| 100000 | 1.08 | 1.00 | .0000 | 100000 | 0 | 0 | 1.000<br>0 | .0000 | 108000 | 0 | 0 | 108000 | 0 | 0 | -8000      | 7.52 |
| 100000 | 1.09 | 1.00 | .0000 | 100000 | 0 | 0 | 1.000<br>0 | .0000 | 109000 | 0 | 0 | 109000 | 0 | 0 | -9000      | 7.52 |
| 100000 | 1.10 | 1.00 | .0000 | 100000 | 0 | 0 | 1.000<br>0 | .0000 | 110000 | 0 | 0 | 110000 | 0 | 0 | -<br>10000 | 7.52 |
| 100000 | 1.11 | 1.00 | .0000 | 100000 | 0 | 0 | 1.000<br>0 | .0000 | 111000 | 0 | 0 | 111000 | 0 | 0 | -<br>11000 | 7.52 |
| 100000 | 1.12 | 1.00 | .0000 | 100000 | 0 | 0 | 1.000<br>0 | .0000 | 112000 | 0 | 0 | 112000 | 0 | 0 | -<br>12000 | 7.52 |
| 100000 | 1.13 | 1.00 | .0000 | 100000 | 0 | 0 | 1.000<br>0 | .0000 | 113000 | 0 | 0 | 113000 | 0 | 0 | -<br>13000 | 7.52 |
| 100000 | 1.14 | 1.00 | .0000 | 100000 | 0 | 0 | 1.000<br>0 | .0000 | 114000 | 0 | 0 | 114000 | 0 | 0 | -<br>14000 | 7.52 |
| 100000 | 1.15 | 1.00 | .0000 | 100000 | 0 | 0 | 1.000<br>0 | .0000 | 115000 | 0 | 0 | 115000 | 0 | 0 | -<br>15000 | 7.52 |
| 100000 | 1.16 | 1.00 | .0000 | 100000 | 0 | 0 | 1.000<br>0 | .0000 | 116000 | 0 | 0 | 116000 | 0 | 0 | -<br>16000 | 7.52 |
| 100000 | 1.17 | 1.00 | .0000 | 100000 | 0 | 0 | 1.000<br>0 | .0000 | 117000 | 0 | 0 | 117000 | 0 | 0 | -<br>17000 | 7.52 |
| 100000 | 1.18 | 1.00 | .0000 | 100000 | 0 | 0 | 1.000<br>0 | .0000 | 118000 | 0 | 0 | 118000 | 0 | 0 | -<br>18000 | 7.52 |



|        |      |      |       |        |   |   |            |       |        |   |   |        |   |   |            |      |
|--------|------|------|-------|--------|---|---|------------|-------|--------|---|---|--------|---|---|------------|------|
| 100000 | 1.19 | 1.00 | .0000 | 100000 | 0 | 0 | 1.000<br>0 | .0000 | 119000 | 0 | 0 | 119000 | 0 | 0 | -<br>19000 | 7.52 |
| 100000 | 1.20 | 1.00 | .0000 | 100000 | 0 | 0 | 1.000<br>0 | .0000 | 120000 | 0 | 0 | 120000 | 0 | 0 | -<br>20000 | 7.52 |
