# Supplementary material for: Hardy-Weinberg Equilibrium Testing of Biological Ascertainment for Mendelian Randomization Studies
Source: PubMed Central journal article supplement — Am J Epidemiol. 2009 Jan 6;169(4):505–14. doi: 10.1093/aje/kwn359 (PMC2640163; doi:10.1093/aje/kwn359), 2009-01-06
Supplement: kwn359_8.pdf [file kwn359_8.pdf]

Web Table 6. Summary of deviations from Hardy Weinberg Equilibrium for sample sizes of 5000, 10000, 20000, 50000 and 100000, and for allele frequencies from 0.05 to 0.95 (with increments of 0.05) after subtracting / adding from the heterozygote group a constant number k ranging from 80% to 120%.  $p_{false}$  and  $q_{false}$  are the allele frequencies observed after subtracting from the heterozygote 1 group a constant number k ranging from 80% to 120%. Hz1 Exp, Het Exp and Hz2 Exp are the expected values of the three genotype groups computed from  $p_{false}$  and  $q_{false}$ . Het Obs are the observed values for Het True after subtracting/adding from the heterozygote group a constant number k ranging from 80% to 120% (which equates to the number presented in No call).  $\chi^2$  is the HWE  $\chi^2$  value.

| N    | k    | $p_{true}$ | $q_{true}$ | Hz1 True | Het True | Hz2 True | $p_{false}$ | $q_{false}$ | Hz1 Exp | Het Exp | Hz2 Exp | Hz1 Obs | Het Obs | Hz2 Obs | No call | $\chi^2$ |
|------|------|------------|------------|----------|----------|----------|-------------|-------------|---------|---------|---------|---------|---------|---------|---------|----------|
| 5000 | .80  | .05        | .95        | 13       | 475      | 4513     | .0413       | .9587       | 8       | 388     | 4508    | 13      | 380     | 4513    | 95      | 2.23     |
| 5000 | .81  | .05        | .95        | 13       | 475      | 4513     | .0417       | .9583       | 9       | 393     | 4509    | 13      | 385     | 4513    | 90      | 1.99     |
| 5000 | .82  | .05        | .95        | 13       | 475      | 4513     | .0422       | .9578       | 9       | 397     | 4509    | 13      | 390     | 4513    | 86      | 1.76     |
| 5000 | .83  | .05        | .95        | 13       | 475      | 4513     | .0426       | .9574       | 9       | 401     | 4509    | 13      | 394     | 4513    | 81      | 1.55     |
| 5000 | .84  | .05        | .95        | 13       | 475      | 4513     | .0431       | .9569       | 9       | 406     | 4509    | 13      | 399     | 4513    | 76      | 1.36     |
| 5000 | .85  | .05        | .95        | 13       | 475      | 4513     | .0435       | .9565       | 9       | 410     | 4509    | 13      | 404     | 4513    | 71      | 1.18     |
| 5000 | .86  | .05        | .95        | 13       | 475      | 4513     | .0439       | .9561       | 10      | 414     | 4510    | 13      | 409     | 4513    | 67      | 1.02     |
| 5000 | .87  | .05        | .95        | 13       | 475      | 4513     | .0444       | .9556       | 10      | 419     | 4510    | 13      | 413     | 4513    | 62      | .87      |
| 5000 | .88  | .05        | .95        | 13       | 475      | 4513     | .0448       | .9552       | 10      | 423     | 4510    | 13      | 418     | 4513    | 57      | .73      |
| 5000 | .89  | .05        | .95        | 13       | 475      | 4513     | .0452       | .9548       | 10      | 427     | 4510    | 13      | 423     | 4513    | 52      | .61      |
| 5000 | .90  | .05        | .95        | 13       | 475      | 4513     | .0457       | .9543       | 10      | 432     | 4510    | 13      | 428     | 4513    | 48      | .50      |
| 5000 | .91  | .05        | .95        | 13       | 475      | 4513     | .0461       | .9539       | 11      | 436     | 4511    | 13      | 432     | 4513    | 43      | .40      |
| 5000 | .92  | .05        | .95        | 13       | 475      | 4513     | .0466       | .9534       | 11      | 440     | 4511    | 13      | 437     | 4513    | 38      | .31      |
| 5000 | .93  | .05        | .95        | 13       | 475      | 4513     | .0470       | .9530       | 11      | 445     | 4511    | 13      | 442     | 4513    | 33      | .24      |
| 5000 | .94  | .05        | .95        | 13       | 475      | 4513     | .0474       | .9526       | 11      | 449     | 4511    | 13      | 447     | 4513    | 29      | .17      |
| 5000 | .95  | .05        | .95        | 13       | 475      | 4513     | .0479       | .9521       | 11      | 453     | 4511    | 13      | 451     | 4513    | 24      | .12      |
| 5000 | .96  | .05        | .95        | 13       | 475      | 4513     | .0483       | .9517       | 12      | 458     | 4512    | 13      | 456     | 4513    | 19      | .07      |
| 5000 | .97  | .05        | .95        | 13       | 475      | 4513     | .0487       | .9513       | 12      | 462     | 4512    | 13      | 461     | 4513    | 14      | .04      |
| 5000 | .98  | .05        | .95        | 13       | 475      | 4513     | .0491       | .9509       | 12      | 466     | 4512    | 13      | 466     | 4513    | 10      | .02      |
| 5000 | .99  | .05        | .95        | 13       | 475      | 4513     | .0496       | .9504       | 12      | 471     | 4512    | 13      | 470     | 4513    | 5       | .00      |
| 5000 | 1.00 | .05        | .95        | 13       | 475      | 4513     | .0500       | .9500       | 13      | 475     | 4513    | 13      | 475     | 4513    | 0       | .00      |
| 5000 | 1.01 | .05        | .95        | 13       | 475      | 4513     | .0504       | .9496       | 13      | 479     | 4513    | 13      | 480     | 4513    | -5      | .00      |
| 5000 | 1.02 | .05        | .95        | 13       | 475      | 4513     | .0509       | .9491       | 13      | 484     | 4513    | 13      | 485     | 4513    | -10     | .02      |
| 5000 | 1.03 | .05        | .95        | 13       | 475      | 4513     | .0513       | .9487       | 13      | 488     | 4513    | 13      | 489     | 4513    | -14     | .04      |
| 5000 | 1.04 | .05        | .95        | 13       | 475      | 4513     | .0517       | .9483       | 13      | 492     | 4513    | 13      | 494     | 4513    | -19     | .07      |
| 5000 | 1.05 | .05        | .95        | 13       | 475      | 4513     | .0521       | .9479       | 14      | 496     | 4514    | 13      | 499     | 4513    | -24     | .11      |

|      |      |     |     |    |     |      |       |       |    |     |      |    |     |      |     |      |
|------|------|-----|-----|----|-----|------|-------|-------|----|-----|------|----|-----|------|-----|------|
| 5000 | 1.06 | .05 | .95 | 13 | 475 | 4513 | .0526 | .9474 | 14 | 501 | 4514 | 13 | 504 | 4513 | -29 | .15  |
| 5000 | 1.07 | .05 | .95 | 13 | 475 | 4513 | .0530 | .9470 | 14 | 505 | 4514 | 13 | 508 | 4513 | -33 | .21  |
| 5000 | 1.08 | .05 | .95 | 13 | 475 | 4513 | .0534 | .9466 | 14 | 509 | 4514 | 13 | 513 | 4513 | -38 | .27  |
| 5000 | 1.09 | .05 | .95 | 13 | 475 | 4513 | .0538 | .9462 | 15 | 514 | 4515 | 13 | 518 | 4513 | -43 | .34  |
| 5000 | 1.10 | .05 | .95 | 13 | 475 | 4513 | .0542 | .9458 | 15 | 518 | 4515 | 13 | 523 | 4513 | -48 | .41  |
| 5000 | 1.11 | .05 | .95 | 13 | 475 | 4513 | .0547 | .9453 | 15 | 522 | 4515 | 13 | 527 | 4513 | -52 | .50  |
| 5000 | 1.12 | .05 | .95 | 13 | 475 | 4513 | .0551 | .9449 | 15 | 526 | 4515 | 13 | 532 | 4513 | -57 | .59  |
| 5000 | 1.13 | .05 | .95 | 13 | 475 | 4513 | .0555 | .9445 | 16 | 531 | 4516 | 13 | 537 | 4513 | -62 | .68  |
| 5000 | 1.14 | .05 | .95 | 13 | 475 | 4513 | .0559 | .9441 | 16 | 535 | 4516 | 13 | 542 | 4513 | -67 | .79  |
| 5000 | 1.15 | .05 | .95 | 13 | 475 | 4513 | .0563 | .9437 | 16 | 539 | 4516 | 13 | 546 | 4513 | -71 | .90  |
| 5000 | 1.16 | .05 | .95 | 13 | 475 | 4513 | .0567 | .9433 | 16 | 543 | 4516 | 13 | 551 | 4513 | -76 | 1.01 |
| 5000 | 1.17 | .05 | .95 | 13 | 475 | 4513 | .0572 | .9428 | 17 | 548 | 4517 | 13 | 556 | 4513 | -81 | 1.14 |
| 5000 | 1.18 | .05 | .95 | 13 | 475 | 4513 | .0576 | .9424 | 17 | 552 | 4517 | 13 | 561 | 4513 | -86 | 1.27 |
| 5000 | 1.19 | .05 | .95 | 13 | 475 | 4513 | .0580 | .9420 | 17 | 556 | 4517 | 13 | 565 | 4513 | -90 | 1.40 |
| 5000 | 1.20 | .05 | .95 | 13 | 475 | 4513 | .0584 | .9416 | 17 | 560 | 4517 | 13 | 570 | 4513 | -95 | 1.54 |
| 5000 | .80  | .10 | .90 | 50 | 900 | 4050 | .0851 | .9149 | 35 | 750 | 4035 | 50 | 720 | 4050 | 180 | 7.84 |
| 5000 | .81  | .10 | .90 | 50 | 900 | 4050 | .0858 | .9142 | 36 | 758 | 4036 | 50 | 729 | 4050 | 171 | 6.99 |
| 5000 | .82  | .10 | .90 | 50 | 900 | 4050 | .0866 | .9134 | 36 | 765 | 4036 | 50 | 738 | 4050 | 162 | 6.21 |
| 5000 | .83  | .10 | .90 | 50 | 900 | 4050 | .0874 | .9126 | 37 | 773 | 4037 | 50 | 747 | 4050 | 153 | 5.48 |
| 5000 | .84  | .10 | .90 | 50 | 900 | 4050 | .0881 | .9119 | 38 | 781 | 4038 | 50 | 756 | 4050 | 144 | 4.81 |
| 5000 | .85  | .10 | .90 | 50 | 900 | 4050 | .0889 | .9111 | 38 | 788 | 4038 | 50 | 765 | 4050 | 135 | 4.18 |
| 5000 | .86  | .10 | .90 | 50 | 900 | 4050 | .0897 | .9103 | 39 | 796 | 4039 | 50 | 774 | 4050 | 126 | 3.60 |
| 5000 | .87  | .10 | .90 | 50 | 900 | 4050 | .0904 | .9096 | 40 | 803 | 4040 | 50 | 783 | 4050 | 117 | 3.08 |
| 5000 | .88  | .10 | .90 | 50 | 900 | 4050 | .0912 | .9088 | 41 | 811 | 4041 | 50 | 792 | 4050 | 108 | 2.60 |
| 5000 | .89  | .10 | .90 | 50 | 900 | 4050 | .0919 | .9081 | 41 | 818 | 4041 | 50 | 801 | 4050 | 99  | 2.16 |
| 5000 | .90  | .10 | .90 | 50 | 900 | 4050 | .0927 | .9073 | 42 | 826 | 4042 | 50 | 810 | 4050 | 90  | 1.77 |
| 5000 | .91  | .10 | .90 | 50 | 900 | 4050 | .0934 | .9066 | 43 | 833 | 4043 | 50 | 819 | 4050 | 81  | 1.42 |
| 5000 | .92  | .10 | .90 | 50 | 900 | 4050 | .0942 | .9058 | 44 | 841 | 4044 | 50 | 828 | 4050 | 72  | 1.11 |
| 5000 | .93  | .10 | .90 | 50 | 900 | 4050 | .0949 | .9051 | 44 | 848 | 4044 | 50 | 837 | 4050 | 63  | .84  |
| 5000 | .94  | .10 | .90 | 50 | 900 | 4050 | .0956 | .9044 | 45 | 856 | 4045 | 50 | 846 | 4050 | 54  | .61  |
| 5000 | .95  | .10 | .90 | 50 | 900 | 4050 | .0964 | .9036 | 46 | 863 | 4046 | 50 | 855 | 4050 | 45  | .42  |
| 5000 | .96  | .10 | .90 | 50 | 900 | 4050 | .0971 | .9029 | 47 | 870 | 4047 | 50 | 864 | 4050 | 36  | .27  |
| 5000 | .97  | .10 | .90 | 50 | 900 | 4050 | .0978 | .9022 | 48 | 878 | 4048 | 50 | 873 | 4050 | 27  | .15  |

|      |      |     |     |     |      |      |       |       |    |      |      |     |      |      |      |       |
|------|------|-----|-----|-----|------|------|-------|-------|----|------|------|-----|------|------|------|-------|
| 5000 | .98  | .10 | .90 | 50  | 900  | 4050 | .0986 | .9014 | 48 | 885  | 4048 | 50  | 882  | 4050 | 18   | .07   |
| 5000 | .99  | .10 | .90 | 50  | 900  | 4050 | .0993 | .9007 | 49 | 893  | 4049 | 50  | 891  | 4050 | 9    | .02   |
| 5000 | 1.00 | .10 | .90 | 50  | 900  | 4050 | .1000 | .9000 | 50 | 900  | 4050 | 50  | 900  | 4050 | 0    | .00   |
| 5000 | 1.01 | .10 | .90 | 50  | 900  | 4050 | .1007 | .8993 | 51 | 907  | 4051 | 50  | 909  | 4050 | -9   | .02   |
| 5000 | 1.02 | .10 | .90 | 50  | 900  | 4050 | .1014 | .8986 | 52 | 915  | 4052 | 50  | 918  | 4050 | -18  | .06   |
| 5000 | 1.03 | .10 | .90 | 50  | 900  | 4050 | .1021 | .8979 | 52 | 922  | 4052 | 50  | 927  | 4050 | -27  | .14   |
| 5000 | 1.04 | .10 | .90 | 50  | 900  | 4050 | .1029 | .8971 | 53 | 929  | 4053 | 50  | 936  | 4050 | -36  | .25   |
| 5000 | 1.05 | .10 | .90 | 50  | 900  | 4050 | .1036 | .8964 | 54 | 937  | 4054 | 50  | 945  | 4050 | -45  | .39   |
| 5000 | 1.06 | .10 | .90 | 50  | 900  | 4050 | .1043 | .8957 | 55 | 944  | 4055 | 50  | 954  | 4050 | -54  | .56   |
| 5000 | 1.07 | .10 | .90 | 50  | 900  | 4050 | .1050 | .8950 | 56 | 951  | 4056 | 50  | 963  | 4050 | -63  | .75   |
| 5000 | 1.08 | .10 | .90 | 50  | 900  | 4050 | .1057 | .8943 | 57 | 959  | 4057 | 50  | 972  | 4050 | -72  | .97   |
| 5000 | 1.09 | .10 | .90 | 50  | 900  | 4050 | .1064 | .8936 | 57 | 966  | 4057 | 50  | 981  | 4050 | -81  | 1.22  |
| 5000 | 1.10 | .10 | .90 | 50  | 900  | 4050 | .1071 | .8929 | 58 | 973  | 4058 | 50  | 990  | 4050 | -90  | 1.50  |
| 5000 | 1.11 | .10 | .90 | 50  | 900  | 4050 | .1078 | .8922 | 59 | 981  | 4059 | 50  | 999  | 4050 | -99  | 1.80  |
| 5000 | 1.12 | .10 | .90 | 50  | 900  | 4050 | .1085 | .8915 | 60 | 988  | 4060 | 50  | 1008 | 4050 | -108 | 2.13  |
| 5000 | 1.13 | .10 | .90 | 50  | 900  | 4050 | .1091 | .8909 | 61 | 995  | 4061 | 50  | 1017 | 4050 | -117 | 2.48  |
| 5000 | 1.14 | .10 | .90 | 50  | 900  | 4050 | .1098 | .8902 | 62 | 1002 | 4062 | 50  | 1026 | 4050 | -126 | 2.86  |
| 5000 | 1.15 | .10 | .90 | 50  | 900  | 4050 | .1105 | .8895 | 63 | 1010 | 4063 | 50  | 1035 | 4050 | -135 | 3.26  |
| 5000 | 1.16 | .10 | .90 | 50  | 900  | 4050 | .1112 | .8888 | 64 | 1017 | 4064 | 50  | 1044 | 4050 | -144 | 3.68  |
| 5000 | 1.17 | .10 | .90 | 50  | 900  | 4050 | .1119 | .8881 | 64 | 1024 | 4064 | 50  | 1053 | 4050 | -153 | 4.13  |
| 5000 | 1.18 | .10 | .90 | 50  | 900  | 4050 | .1126 | .8874 | 65 | 1031 | 4065 | 50  | 1062 | 4050 | -162 | 4.60  |
| 5000 | 1.19 | .10 | .90 | 50  | 900  | 4050 | .1132 | .8868 | 66 | 1038 | 4066 | 50  | 1071 | 4050 | -171 | 5.09  |
| 5000 | 1.20 | .10 | .90 | 50  | 900  | 4050 | .1139 | .8861 | 67 | 1046 | 4067 | 50  | 1080 | 4050 | -180 | 5.61  |
| 5000 | .80  | .15 | .85 | 113 | 1275 | 3613 | .1312 | .8688 | 82 | 1082 | 3582 | 113 | 1020 | 3613 | 255  | 15.42 |
| 5000 | .81  | .15 | .85 | 113 | 1275 | 3613 | .1322 | .8678 | 83 | 1092 | 3583 | 113 | 1033 | 3613 | 242  | 13.78 |
| 5000 | .82  | .15 | .85 | 113 | 1275 | 3613 | .1332 | .8668 | 85 | 1101 | 3585 | 113 | 1046 | 3613 | 230  | 12.25 |
| 5000 | .83  | .15 | .85 | 113 | 1275 | 3613 | .1341 | .8659 | 86 | 1111 | 3586 | 113 | 1058 | 3613 | 217  | 10.83 |
| 5000 | .84  | .15 | .85 | 113 | 1275 | 3613 | .1351 | .8649 | 88 | 1121 | 3588 | 113 | 1071 | 3613 | 204  | 9.50  |
| 5000 | .85  | .15 | .85 | 113 | 1275 | 3613 | .1361 | .8639 | 89 | 1131 | 3589 | 113 | 1084 | 3613 | 191  | 8.28  |
| 5000 | .86  | .15 | .85 | 113 | 1275 | 3613 | .1370 | .8630 | 91 | 1140 | 3591 | 113 | 1097 | 3613 | 179  | 7.14  |
| 5000 | .87  | .15 | .85 | 113 | 1275 | 3613 | .1380 | .8620 | 92 | 1150 | 3592 | 113 | 1109 | 3613 | 166  | 6.11  |
| 5000 | .88  | .15 | .85 | 113 | 1275 | 3613 | .1390 | .8610 | 94 | 1160 | 3594 | 113 | 1122 | 3613 | 153  | 5.16  |
| 5000 | .89  | .15 | .85 | 113 | 1275 | 3613 | .1399 | .8601 | 95 | 1170 | 3595 | 113 | 1135 | 3613 | 140  | 4.30  |

|      |      |     |     |     |      |      |       |       |     |      |      |     |      |      |      |       |
|------|------|-----|-----|-----|------|------|-------|-------|-----|------|------|-----|------|------|------|-------|
| 5000 | .90  | .15 | .85 | 113 | 1275 | 3613 | .1408 | .8592 | 97  | 1179 | 3597 | 113 | 1148 | 3613 | 128  | 3.52  |
| 5000 | .91  | .15 | .85 | 113 | 1275 | 3613 | .1418 | .8582 | 98  | 1189 | 3598 | 113 | 1160 | 3613 | 115  | 2.83  |
| 5000 | .92  | .15 | .85 | 113 | 1275 | 3613 | .1427 | .8573 | 100 | 1198 | 3600 | 113 | 1173 | 3613 | 102  | 2.22  |
| 5000 | .93  | .15 | .85 | 113 | 1275 | 3613 | .1436 | .8564 | 101 | 1208 | 3601 | 113 | 1186 | 3613 | 89   | 1.68  |
| 5000 | .94  | .15 | .85 | 113 | 1275 | 3613 | .1446 | .8554 | 103 | 1218 | 3603 | 113 | 1199 | 3613 | 77   | 1.23  |
| 5000 | .95  | .15 | .85 | 113 | 1275 | 3613 | .1455 | .8545 | 104 | 1227 | 3604 | 113 | 1211 | 3613 | 64   | .84   |
| 5000 | .96  | .15 | .85 | 113 | 1275 | 3613 | .1464 | .8536 | 106 | 1237 | 3606 | 113 | 1224 | 3613 | 51   | .54   |
| 5000 | .97  | .15 | .85 | 113 | 1275 | 3613 | .1473 | .8527 | 108 | 1246 | 3608 | 113 | 1237 | 3613 | 38   | .30   |
| 5000 | .98  | .15 | .85 | 113 | 1275 | 3613 | .1482 | .8518 | 109 | 1256 | 3609 | 113 | 1250 | 3613 | 26   | .13   |
| 5000 | .99  | .15 | .85 | 113 | 1275 | 3613 | .1491 | .8509 | 111 | 1265 | 3611 | 113 | 1262 | 3613 | 13   | .03   |
| 5000 | 1.00 | .15 | .85 | 113 | 1275 | 3613 | .1500 | .8500 | 113 | 1275 | 3613 | 113 | 1275 | 3613 | 0    | .00   |
| 5000 | 1.01 | .15 | .85 | 113 | 1275 | 3613 | .1509 | .8491 | 114 | 1284 | 3614 | 113 | 1288 | 3613 | -13  | .03   |
| 5000 | 1.02 | .15 | .85 | 113 | 1275 | 3613 | .1518 | .8482 | 116 | 1294 | 3616 | 113 | 1301 | 3613 | -26  | .13   |
| 5000 | 1.03 | .15 | .85 | 113 | 1275 | 3613 | .1527 | .8473 | 117 | 1303 | 3617 | 113 | 1313 | 3613 | -38  | .29   |
| 5000 | 1.04 | .15 | .85 | 113 | 1275 | 3613 | .1535 | .8465 | 119 | 1313 | 3619 | 113 | 1326 | 3613 | -51  | .51   |
| 5000 | 1.05 | .15 | .85 | 113 | 1275 | 3613 | .1544 | .8456 | 121 | 1322 | 3621 | 113 | 1339 | 3613 | -64  | .78   |
| 5000 | 1.06 | .15 | .85 | 113 | 1275 | 3613 | .1553 | .8447 | 122 | 1332 | 3622 | 113 | 1352 | 3613 | -77  | 1.12  |
| 5000 | 1.07 | .15 | .85 | 113 | 1275 | 3613 | .1561 | .8439 | 124 | 1341 | 3624 | 113 | 1364 | 3613 | -89  | 1.52  |
| 5000 | 1.08 | .15 | .85 | 113 | 1275 | 3613 | .1570 | .8430 | 126 | 1350 | 3626 | 113 | 1377 | 3613 | -102 | 1.97  |
| 5000 | 1.09 | .15 | .85 | 113 | 1275 | 3613 | .1579 | .8421 | 127 | 1360 | 3627 | 113 | 1390 | 3613 | -115 | 2.47  |
| 5000 | 1.10 | .15 | .85 | 113 | 1275 | 3613 | .1587 | .8413 | 129 | 1369 | 3629 | 113 | 1403 | 3613 | -128 | 3.03  |
| 5000 | 1.11 | .15 | .85 | 113 | 1275 | 3613 | .1595 | .8405 | 131 | 1379 | 3631 | 113 | 1415 | 3613 | -140 | 3.64  |
| 5000 | 1.12 | .15 | .85 | 113 | 1275 | 3613 | .1604 | .8396 | 133 | 1388 | 3633 | 113 | 1428 | 3613 | -153 | 4.31  |
| 5000 | 1.13 | .15 | .85 | 113 | 1275 | 3613 | .1612 | .8388 | 134 | 1397 | 3634 | 113 | 1441 | 3613 | -166 | 5.02  |
| 5000 | 1.14 | .15 | .85 | 113 | 1275 | 3613 | .1621 | .8379 | 136 | 1406 | 3636 | 113 | 1454 | 3613 | -179 | 5.79  |
| 5000 | 1.15 | .15 | .85 | 113 | 1275 | 3613 | .1629 | .8371 | 138 | 1416 | 3638 | 113 | 1466 | 3613 | -191 | 6.60  |
| 5000 | 1.16 | .15 | .85 | 113 | 1275 | 3613 | .1637 | .8363 | 139 | 1425 | 3639 | 113 | 1479 | 3613 | -204 | 7.47  |
| 5000 | 1.17 | .15 | .85 | 113 | 1275 | 3613 | .1645 | .8355 | 141 | 1434 | 3641 | 113 | 1492 | 3613 | -217 | 8.38  |
| 5000 | 1.18 | .15 | .85 | 113 | 1275 | 3613 | .1654 | .8346 | 143 | 1444 | 3643 | 113 | 1505 | 3613 | -230 | 9.34  |
| 5000 | 1.19 | .15 | .85 | 113 | 1275 | 3613 | .1662 | .8338 | 145 | 1453 | 3645 | 113 | 1517 | 3613 | -242 | 10.34 |
| 5000 | 1.20 | .15 | .85 | 113 | 1275 | 3613 | .1670 | .8330 | 147 | 1462 | 3647 | 113 | 1530 | 3613 | -255 | 11.39 |
| 5000 | .80  | .20 | .80 | 200 | 1600 | 3200 | .1795 | .8205 | 151 | 1378 | 3151 | 200 | 1280 | 3200 | 320  | 23.88 |
| 5000 | .81  | .20 | .80 | 200 | 1600 | 3200 | .1806 | .8194 | 153 | 1390 | 3153 | 200 | 1296 | 3200 | 304  | 21.36 |

|      |      |     |     |     |      |      |       |       |     |      |      |     |      |      |      |       |
|------|------|-----|-----|-----|------|------|-------|-------|-----|------|------|-----|------|------|------|-------|
| 5000 | .82  | .20 | .80 | 200 | 1600 | 3200 | .1817 | .8183 | 156 | 1401 | 3156 | 200 | 1312 | 3200 | 288  | 19.01 |
| 5000 | .83  | .20 | .80 | 200 | 1600 | 3200 | .1827 | .8173 | 158 | 1412 | 3158 | 200 | 1328 | 3200 | 272  | 16.82 |
| 5000 | .84  | .20 | .80 | 200 | 1600 | 3200 | .1838 | .8162 | 160 | 1423 | 3160 | 200 | 1344 | 3200 | 256  | 14.77 |
| 5000 | .85  | .20 | .80 | 200 | 1600 | 3200 | .1849 | .8151 | 163 | 1435 | 3163 | 200 | 1360 | 3200 | 240  | 12.88 |
| 5000 | .86  | .20 | .80 | 200 | 1600 | 3200 | .1859 | .8141 | 165 | 1446 | 3165 | 200 | 1376 | 3200 | 224  | 11.13 |
| 5000 | .87  | .20 | .80 | 200 | 1600 | 3200 | .1870 | .8130 | 168 | 1457 | 3168 | 200 | 1392 | 3200 | 208  | 9.52  |
| 5000 | .88  | .20 | .80 | 200 | 1600 | 3200 | .1880 | .8120 | 170 | 1468 | 3170 | 200 | 1408 | 3200 | 192  | 8.05  |
| 5000 | .89  | .20 | .80 | 200 | 1600 | 3200 | .1891 | .8109 | 172 | 1479 | 3172 | 200 | 1424 | 3200 | 176  | 6.71  |
| 5000 | .90  | .20 | .80 | 200 | 1600 | 3200 | .1901 | .8099 | 175 | 1490 | 3175 | 200 | 1440 | 3200 | 160  | 5.50  |
| 5000 | .91  | .20 | .80 | 200 | 1600 | 3200 | .1911 | .8089 | 177 | 1501 | 3177 | 200 | 1456 | 3200 | 144  | 4.42  |
| 5000 | .92  | .20 | .80 | 200 | 1600 | 3200 | .1921 | .8079 | 180 | 1512 | 3180 | 200 | 1472 | 3200 | 128  | 3.47  |
| 5000 | .93  | .20 | .80 | 200 | 1600 | 3200 | .1931 | .8069 | 182 | 1523 | 3182 | 200 | 1488 | 3200 | 112  | 2.64  |
| 5000 | .94  | .20 | .80 | 200 | 1600 | 3200 | .1941 | .8059 | 185 | 1534 | 3185 | 200 | 1504 | 3200 | 96   | 1.92  |
| 5000 | .95  | .20 | .80 | 200 | 1600 | 3200 | .1951 | .8049 | 187 | 1545 | 3187 | 200 | 1520 | 3200 | 80   | 1.33  |
| 5000 | .96  | .20 | .80 | 200 | 1600 | 3200 | .1961 | .8039 | 190 | 1556 | 3190 | 200 | 1536 | 3200 | 64   | .84   |
| 5000 | .97  | .20 | .80 | 200 | 1600 | 3200 | .1971 | .8029 | 192 | 1567 | 3192 | 200 | 1552 | 3200 | 48   | .47   |
| 5000 | .98  | .20 | .80 | 200 | 1600 | 3200 | .1981 | .8019 | 195 | 1578 | 3195 | 200 | 1568 | 3200 | 32   | .21   |
| 5000 | .99  | .20 | .80 | 200 | 1600 | 3200 | .1990 | .8010 | 197 | 1589 | 3197 | 200 | 1584 | 3200 | 16   | .05   |
| 5000 | 1.00 | .20 | .80 | 200 | 1600 | 3200 | .2000 | .8000 | 200 | 1600 | 3200 | 200 | 1600 | 3200 | 0    | .00   |
| 5000 | 1.01 | .20 | .80 | 200 | 1600 | 3200 | .2010 | .7990 | 203 | 1611 | 3203 | 200 | 1616 | 3200 | -16  | .05   |
| 5000 | 1.02 | .20 | .80 | 200 | 1600 | 3200 | .2019 | .7981 | 205 | 1622 | 3205 | 200 | 1632 | 3200 | -32  | .20   |
| 5000 | 1.03 | .20 | .80 | 200 | 1600 | 3200 | .2029 | .7971 | 208 | 1633 | 3208 | 200 | 1648 | 3200 | -48  | .45   |
| 5000 | 1.04 | .20 | .80 | 200 | 1600 | 3200 | .2038 | .7962 | 210 | 1643 | 3210 | 200 | 1664 | 3200 | -64  | .80   |
| 5000 | 1.05 | .20 | .80 | 200 | 1600 | 3200 | .2047 | .7953 | 213 | 1654 | 3213 | 200 | 1680 | 3200 | -80  | 1.24  |
| 5000 | 1.06 | .20 | .80 | 200 | 1600 | 3200 | .2057 | .7943 | 216 | 1665 | 3216 | 200 | 1696 | 3200 | -96  | 1.77  |
| 5000 | 1.07 | .20 | .80 | 200 | 1600 | 3200 | .2066 | .7934 | 218 | 1676 | 3218 | 200 | 1712 | 3200 | -112 | 2.40  |
| 5000 | 1.08 | .20 | .80 | 200 | 1600 | 3200 | .2075 | .7925 | 221 | 1686 | 3221 | 200 | 1728 | 3200 | -128 | 3.11  |
| 5000 | 1.09 | .20 | .80 | 200 | 1600 | 3200 | .2084 | .7916 | 223 | 1697 | 3223 | 200 | 1744 | 3200 | -144 | 3.91  |
| 5000 | 1.10 | .20 | .80 | 200 | 1600 | 3200 | .2093 | .7907 | 226 | 1708 | 3226 | 200 | 1760 | 3200 | -160 | 4.80  |
| 5000 | 1.11 | .20 | .80 | 200 | 1600 | 3200 | .2102 | .7898 | 229 | 1719 | 3229 | 200 | 1776 | 3200 | -176 | 5.77  |
| 5000 | 1.12 | .20 | .80 | 200 | 1600 | 3200 | .2111 | .7889 | 231 | 1729 | 3231 | 200 | 1792 | 3200 | -192 | 6.83  |
| 5000 | 1.13 | .20 | .80 | 200 | 1600 | 3200 | .2120 | .7880 | 234 | 1740 | 3234 | 200 | 1808 | 3200 | -208 | 7.97  |
| 5000 | 1.14 | .20 | .80 | 200 | 1600 | 3200 | .2129 | .7871 | 237 | 1751 | 3237 | 200 | 1824 | 3200 | -224 | 9.19  |

|      |      |     |     |     |      |      |       |       |     |      |      |     |      |      |      |       |
|------|------|-----|-----|-----|------|------|-------|-------|-----|------|------|-----|------|------|------|-------|
| 5000 | 1.15 | .20 | .80 | 200 | 1600 | 3200 | .2137 | .7863 | 239 | 1761 | 3239 | 200 | 1840 | 3200 | -240 | 10.48 |
| 5000 | 1.16 | .20 | .80 | 200 | 1600 | 3200 | .2146 | .7854 | 242 | 1772 | 3242 | 200 | 1856 | 3200 | -256 | 11.86 |
| 5000 | 1.17 | .20 | .80 | 200 | 1600 | 3200 | .2155 | .7845 | 245 | 1782 | 3245 | 200 | 1872 | 3200 | -272 | 13.31 |
| 5000 | 1.18 | .20 | .80 | 200 | 1600 | 3200 | .2163 | .7837 | 247 | 1793 | 3247 | 200 | 1888 | 3200 | -288 | 14.84 |
| 5000 | 1.19 | .20 | .80 | 200 | 1600 | 3200 | .2172 | .7828 | 250 | 1804 | 3250 | 200 | 1904 | 3200 | -304 | 16.44 |
| 5000 | 1.20 | .20 | .80 | 200 | 1600 | 3200 | .2180 | .7820 | 253 | 1814 | 3253 | 200 | 1920 | 3200 | -320 | 18.12 |
| 5000 | .80  | .25 | .75 | 313 | 1875 | 2813 | .2297 | .7703 | 244 | 1637 | 2744 | 313 | 1500 | 2813 | 375  | 32.32 |
| 5000 | .81  | .25 | .75 | 313 | 1875 | 2813 | .2308 | .7692 | 247 | 1649 | 2747 | 313 | 1519 | 2813 | 356  | 28.94 |
| 5000 | .82  | .25 | .75 | 313 | 1875 | 2813 | .2319 | .7681 | 251 | 1661 | 2751 | 313 | 1538 | 2813 | 338  | 25.78 |
| 5000 | .83  | .25 | .75 | 313 | 1875 | 2813 | .2330 | .7670 | 254 | 1673 | 2754 | 313 | 1556 | 2813 | 319  | 22.82 |
| 5000 | .84  | .25 | .75 | 313 | 1875 | 2813 | .2340 | .7660 | 257 | 1685 | 2757 | 313 | 1575 | 2813 | 300  | 20.07 |
| 5000 | .85  | .25 | .75 | 313 | 1875 | 2813 | .2351 | .7649 | 261 | 1697 | 2761 | 313 | 1594 | 2813 | 281  | 17.51 |
| 5000 | .86  | .25 | .75 | 313 | 1875 | 2813 | .2361 | .7639 | 264 | 1709 | 2764 | 313 | 1613 | 2813 | 263  | 15.14 |
| 5000 | .87  | .25 | .75 | 313 | 1875 | 2813 | .2372 | .7628 | 268 | 1721 | 2768 | 313 | 1631 | 2813 | 244  | 12.96 |
| 5000 | .88  | .25 | .75 | 313 | 1875 | 2813 | .2382 | .7618 | 271 | 1733 | 2771 | 313 | 1650 | 2813 | 225  | 10.97 |
| 5000 | .89  | .25 | .75 | 313 | 1875 | 2813 | .2392 | .7608 | 274 | 1745 | 2774 | 313 | 1669 | 2813 | 206  | 9.15  |
| 5000 | .90  | .25 | .75 | 313 | 1875 | 2813 | .2403 | .7597 | 278 | 1757 | 2778 | 313 | 1688 | 2813 | 188  | 7.51  |
| 5000 | .91  | .25 | .75 | 313 | 1875 | 2813 | .2413 | .7587 | 281 | 1769 | 2781 | 313 | 1706 | 2813 | 169  | 6.04  |
| 5000 | .92  | .25 | .75 | 313 | 1875 | 2813 | .2423 | .7577 | 285 | 1781 | 2785 | 313 | 1725 | 2813 | 150  | 4.74  |
| 5000 | .93  | .25 | .75 | 313 | 1875 | 2813 | .2433 | .7567 | 288 | 1793 | 2788 | 313 | 1744 | 2813 | 131  | 3.61  |
| 5000 | .94  | .25 | .75 | 313 | 1875 | 2813 | .2442 | .7558 | 292 | 1804 | 2792 | 313 | 1763 | 2813 | 113  | 2.63  |
| 5000 | .95  | .25 | .75 | 313 | 1875 | 2813 | .2452 | .7548 | 295 | 1816 | 2795 | 313 | 1781 | 2813 | 94   | 1.82  |
| 5000 | .96  | .25 | .75 | 313 | 1875 | 2813 | .2462 | .7538 | 299 | 1828 | 2799 | 313 | 1800 | 2813 | 75   | 1.15  |
| 5000 | .97  | .25 | .75 | 313 | 1875 | 2813 | .2472 | .7528 | 302 | 1840 | 2802 | 313 | 1819 | 2813 | 56   | .64   |
| 5000 | .98  | .25 | .75 | 313 | 1875 | 2813 | .2481 | .7519 | 305 | 1852 | 2805 | 313 | 1838 | 2813 | 38   | .28   |
| 5000 | .99  | .25 | .75 | 313 | 1875 | 2813 | .2491 | .7509 | 309 | 1863 | 2809 | 313 | 1856 | 2813 | 19   | .07   |
| 5000 | 1.00 | .25 | .75 | 313 | 1875 | 2813 | .2500 | .7500 | 313 | 1875 | 2813 | 313 | 1875 | 2813 | 0    | .00   |
| 5000 | 1.01 | .25 | .75 | 313 | 1875 | 2813 | .2509 | .7491 | 316 | 1887 | 2816 | 313 | 1894 | 2813 | -19  | .07   |
| 5000 | 1.02 | .25 | .75 | 313 | 1875 | 2813 | .2519 | .7481 | 320 | 1898 | 2820 | 313 | 1913 | 2813 | -38  | .28   |
| 5000 | 1.03 | .25 | .75 | 313 | 1875 | 2813 | .2528 | .7472 | 323 | 1910 | 2823 | 313 | 1931 | 2813 | -56  | .62   |
| 5000 | 1.04 | .25 | .75 | 313 | 1875 | 2813 | .2537 | .7463 | 327 | 1922 | 2827 | 313 | 1950 | 2813 | -75  | 1.10  |
| 5000 | 1.05 | .25 | .75 | 313 | 1875 | 2813 | .2546 | .7454 | 330 | 1933 | 2830 | 313 | 1969 | 2813 | -94  | 1.70  |
| 5000 | 1.06 | .25 | .75 | 313 | 1875 | 2813 | .2555 | .7445 | 334 | 1945 | 2834 | 313 | 1988 | 2813 | -113 | 2.44  |

|      |      |     |     |     |      |      |       |       |     |      |      |     |      |      |      |       |
|------|------|-----|-----|-----|------|------|-------|-------|-----|------|------|-----|------|------|------|-------|
| 5000 | 1.07 | .25 | .75 | 313 | 1875 | 2813 | .2564 | .7436 | 337 | 1957 | 2837 | 313 | 2006 | 2813 | -131 | 3.30  |
| 5000 | 1.08 | .25 | .75 | 313 | 1875 | 2813 | .2573 | .7427 | 341 | 1968 | 2841 | 313 | 2025 | 2813 | -150 | 4.29  |
| 5000 | 1.09 | .25 | .75 | 313 | 1875 | 2813 | .2582 | .7418 | 344 | 1980 | 2844 | 313 | 2044 | 2813 | -169 | 5.40  |
| 5000 | 1.10 | .25 | .75 | 313 | 1875 | 2813 | .2590 | .7410 | 348 | 1991 | 2848 | 313 | 2063 | 2813 | -188 | 6.62  |
| 5000 | 1.11 | .25 | .75 | 313 | 1875 | 2813 | .2599 | .7401 | 352 | 2003 | 2852 | 313 | 2081 | 2813 | -206 | 7.97  |
| 5000 | 1.12 | .25 | .75 | 313 | 1875 | 2813 | .2608 | .7392 | 355 | 2014 | 2855 | 313 | 2100 | 2813 | -225 | 9.43  |
| 5000 | 1.13 | .25 | .75 | 313 | 1875 | 2813 | .2616 | .7384 | 359 | 2026 | 2859 | 313 | 2119 | 2813 | -244 | 11.01 |
| 5000 | 1.14 | .25 | .75 | 313 | 1875 | 2813 | .2625 | .7375 | 363 | 2037 | 2863 | 313 | 2138 | 2813 | -263 | 12.70 |
| 5000 | 1.15 | .25 | .75 | 313 | 1875 | 2813 | .2633 | .7367 | 366 | 2049 | 2866 | 313 | 2156 | 2813 | -281 | 14.50 |
| 5000 | 1.16 | .25 | .75 | 313 | 1875 | 2813 | .2642 | .7358 | 370 | 2060 | 2870 | 313 | 2175 | 2813 | -300 | 16.40 |
| 5000 | 1.17 | .25 | .75 | 313 | 1875 | 2813 | .2650 | .7350 | 373 | 2072 | 2873 | 313 | 2194 | 2813 | -319 | 18.42 |
| 5000 | 1.18 | .25 | .75 | 313 | 1875 | 2813 | .2658 | .7342 | 377 | 2083 | 2877 | 313 | 2213 | 2813 | -338 | 20.54 |
| 5000 | 1.19 | .25 | .75 | 313 | 1875 | 2813 | .2666 | .7334 | 381 | 2095 | 2881 | 313 | 2231 | 2813 | -356 | 22.76 |
| 5000 | 1.20 | .25 | .75 | 313 | 1875 | 2813 | .2674 | .7326 | 384 | 2106 | 2884 | 313 | 2250 | 2813 | -375 | 25.09 |
| 5000 | .80  | .30 | .70 | 450 | 2100 | 2450 | .2817 | .7183 | 363 | 1853 | 2363 | 450 | 1680 | 2450 | 420  | 40.05 |
| 5000 | .81  | .30 | .70 | 450 | 2100 | 2450 | .2827 | .7173 | 368 | 1866 | 2368 | 450 | 1701 | 2450 | 399  | 35.90 |
| 5000 | .82  | .30 | .70 | 450 | 2100 | 2450 | .2836 | .7164 | 372 | 1878 | 2372 | 450 | 1722 | 2450 | 378  | 32.00 |
| 5000 | .83  | .30 | .70 | 450 | 2100 | 2450 | .2846 | .7154 | 376 | 1891 | 2376 | 450 | 1743 | 2450 | 357  | 28.35 |
| 5000 | .84  | .30 | .70 | 450 | 2100 | 2450 | .2856 | .7144 | 380 | 1903 | 2380 | 450 | 1764 | 2450 | 336  | 24.94 |
| 5000 | .85  | .30 | .70 | 450 | 2100 | 2450 | .2866 | .7134 | 385 | 1916 | 2385 | 450 | 1785 | 2450 | 315  | 21.78 |
| 5000 | .86  | .30 | .70 | 450 | 2100 | 2450 | .2875 | .7125 | 389 | 1928 | 2389 | 450 | 1806 | 2450 | 294  | 18.85 |
| 5000 | .87  | .30 | .70 | 450 | 2100 | 2450 | .2884 | .7116 | 393 | 1940 | 2393 | 450 | 1827 | 2450 | 273  | 16.14 |
| 5000 | .88  | .30 | .70 | 450 | 2100 | 2450 | .2894 | .7106 | 398 | 1953 | 2398 | 450 | 1848 | 2450 | 252  | 13.67 |
| 5000 | .89  | .30 | .70 | 450 | 2100 | 2450 | .2903 | .7097 | 402 | 1965 | 2402 | 450 | 1869 | 2450 | 231  | 11.41 |
| 5000 | .90  | .30 | .70 | 450 | 2100 | 2450 | .2912 | .7088 | 406 | 1977 | 2406 | 450 | 1890 | 2450 | 210  | 9.37  |
| 5000 | .91  | .30 | .70 | 450 | 2100 | 2450 | .2921 | .7079 | 411 | 1990 | 2411 | 450 | 1911 | 2450 | 189  | 7.54  |
| 5000 | .92  | .30 | .70 | 450 | 2100 | 2450 | .2930 | .7070 | 415 | 2002 | 2415 | 450 | 1932 | 2450 | 168  | 5.92  |
| 5000 | .93  | .30 | .70 | 450 | 2100 | 2450 | .2939 | .7061 | 419 | 2014 | 2419 | 450 | 1953 | 2450 | 147  | 4.51  |
| 5000 | .94  | .30 | .70 | 450 | 2100 | 2450 | .2948 | .7052 | 424 | 2027 | 2424 | 450 | 1974 | 2450 | 126  | 3.29  |
| 5000 | .95  | .30 | .70 | 450 | 2100 | 2450 | .2957 | .7043 | 428 | 2039 | 2428 | 450 | 1995 | 2450 | 105  | 2.27  |
| 5000 | .96  | .30 | .70 | 450 | 2100 | 2450 | .2966 | .7034 | 432 | 2051 | 2432 | 450 | 2016 | 2450 | 84   | 1.44  |
| 5000 | .97  | .30 | .70 | 450 | 2100 | 2450 | .2974 | .7026 | 437 | 2063 | 2437 | 450 | 2037 | 2450 | 63   | .81   |
| 5000 | .98  | .30 | .70 | 450 | 2100 | 2450 | .2983 | .7017 | 441 | 2076 | 2441 | 450 | 2058 | 2450 | 42   | .36   |

|      |      |     |     |     |      |      |       |       |     |      |      |     |      |      |      |       |
|------|------|-----|-----|-----|------|------|-------|-------|-----|------|------|-----|------|------|------|-------|
| 5000 | .99  | .30 | .70 | 450 | 2100 | 2450 | .2992 | .7008 | 446 | 2088 | 2446 | 450 | 2079 | 2450 | 21   | .09   |
| 5000 | 1.00 | .30 | .70 | 450 | 2100 | 2450 | .3000 | .7000 | 450 | 2100 | 2450 | 450 | 2100 | 2450 | 0    | .00   |
| 5000 | 1.01 | .30 | .70 | 450 | 2100 | 2450 | .3008 | .6992 | 454 | 2112 | 2454 | 450 | 2121 | 2450 | -21  | .09   |
| 5000 | 1.02 | .30 | .70 | 450 | 2100 | 2450 | .3017 | .6983 | 459 | 2124 | 2459 | 450 | 2142 | 2450 | -42  | .35   |
| 5000 | 1.03 | .30 | .70 | 450 | 2100 | 2450 | .3025 | .6975 | 463 | 2136 | 2463 | 450 | 2163 | 2450 | -63  | .78   |
| 5000 | 1.04 | .30 | .70 | 450 | 2100 | 2450 | .3033 | .6967 | 468 | 2149 | 2468 | 450 | 2184 | 2450 | -84  | 1.38  |
| 5000 | 1.05 | .30 | .70 | 450 | 2100 | 2450 | .3041 | .6959 | 472 | 2161 | 2472 | 450 | 2205 | 2450 | -105 | 2.14  |
| 5000 | 1.06 | .30 | .70 | 450 | 2100 | 2450 | .3049 | .6951 | 477 | 2173 | 2477 | 450 | 2226 | 2450 | -126 | 3.07  |
| 5000 | 1.07 | .30 | .70 | 450 | 2100 | 2450 | .3057 | .6943 | 481 | 2185 | 2481 | 450 | 2247 | 2450 | -147 | 4.15  |
| 5000 | 1.08 | .30 | .70 | 450 | 2100 | 2450 | .3065 | .6935 | 485 | 2197 | 2485 | 450 | 2268 | 2450 | -168 | 5.40  |
| 5000 | 1.09 | .30 | .70 | 450 | 2100 | 2450 | .3073 | .6927 | 490 | 2209 | 2490 | 450 | 2289 | 2450 | -189 | 6.79  |
| 5000 | 1.10 | .30 | .70 | 450 | 2100 | 2450 | .3081 | .6919 | 494 | 2221 | 2494 | 450 | 2310 | 2450 | -210 | 8.34  |
| 5000 | 1.11 | .30 | .70 | 450 | 2100 | 2450 | .3088 | .6912 | 499 | 2233 | 2499 | 450 | 2331 | 2450 | -231 | 10.04 |
| 5000 | 1.12 | .30 | .70 | 450 | 2100 | 2450 | .3096 | .6904 | 503 | 2245 | 2503 | 450 | 2352 | 2450 | -252 | 11.89 |
| 5000 | 1.13 | .30 | .70 | 450 | 2100 | 2450 | .3104 | .6896 | 508 | 2257 | 2508 | 450 | 2373 | 2450 | -273 | 13.88 |
| 5000 | 1.14 | .30 | .70 | 450 | 2100 | 2450 | .3111 | .6889 | 512 | 2269 | 2512 | 450 | 2394 | 2450 | -294 | 16.01 |
| 5000 | 1.15 | .30 | .70 | 450 | 2100 | 2450 | .3119 | .6881 | 517 | 2281 | 2517 | 450 | 2415 | 2450 | -315 | 18.28 |
| 5000 | 1.16 | .30 | .70 | 450 | 2100 | 2450 | .3126 | .6874 | 521 | 2293 | 2521 | 450 | 2436 | 2450 | -336 | 20.70 |
| 5000 | 1.17 | .30 | .70 | 450 | 2100 | 2450 | .3133 | .6867 | 526 | 2305 | 2526 | 450 | 2457 | 2450 | -357 | 23.24 |
| 5000 | 1.18 | .30 | .70 | 450 | 2100 | 2450 | .3141 | .6859 | 530 | 2317 | 2530 | 450 | 2478 | 2450 | -378 | 25.93 |
| 5000 | 1.19 | .30 | .70 | 450 | 2100 | 2450 | .3148 | .6852 | 535 | 2329 | 2535 | 450 | 2499 | 2450 | -399 | 28.74 |
| 5000 | 1.20 | .30 | .70 | 450 | 2100 | 2450 | .3155 | .6845 | 540 | 2341 | 2540 | 450 | 2520 | 2450 | -420 | 31.69 |
| 5000 | .80  | .35 | .65 | 613 | 2275 | 2113 | .3350 | .6650 | 510 | 2025 | 2010 | 613 | 1820 | 2113 | 455  | 46.57 |
| 5000 | .81  | .35 | .65 | 613 | 2275 | 2113 | .3358 | .6642 | 515 | 2038 | 2015 | 613 | 1843 | 2113 | 432  | 41.76 |
| 5000 | .82  | .35 | .65 | 613 | 2275 | 2113 | .3366 | .6634 | 520 | 2050 | 2020 | 613 | 1866 | 2113 | 410  | 37.25 |
| 5000 | .83  | .35 | .65 | 613 | 2275 | 2113 | .3374 | .6626 | 525 | 2063 | 2025 | 613 | 1888 | 2113 | 387  | 33.02 |
| 5000 | .84  | .35 | .65 | 613 | 2275 | 2113 | .3382 | .6618 | 530 | 2075 | 2030 | 613 | 1911 | 2113 | 364  | 29.07 |
| 5000 | .85  | .35 | .65 | 613 | 2275 | 2113 | .3390 | .6610 | 535 | 2088 | 2035 | 613 | 1934 | 2113 | 341  | 25.39 |
| 5000 | .86  | .35 | .65 | 613 | 2275 | 2113 | .3398 | .6602 | 541 | 2100 | 2041 | 613 | 1957 | 2113 | 319  | 21.99 |
| 5000 | .87  | .35 | .65 | 613 | 2275 | 2113 | .3406 | .6594 | 546 | 2113 | 2046 | 613 | 1979 | 2113 | 296  | 18.84 |
| 5000 | .88  | .35 | .65 | 613 | 2275 | 2113 | .3413 | .6587 | 551 | 2126 | 2051 | 613 | 2002 | 2113 | 273  | 15.96 |
| 5000 | .89  | .35 | .65 | 613 | 2275 | 2113 | .3421 | .6579 | 556 | 2138 | 2056 | 613 | 2025 | 2113 | 250  | 13.33 |
| 5000 | .90  | .35 | .65 | 613 | 2275 | 2113 | .3428 | .6572 | 561 | 2151 | 2061 | 613 | 2048 | 2113 | 228  | 10.95 |



|      |      |     |     |     |      |      |       |       |     |      |      |     |      |      |      |       |
|------|------|-----|-----|-----|------|------|-------|-------|-----|------|------|-----|------|------|------|-------|
| 5000 | .91  | .35 | .65 | 613 | 2275 | 2113 | .3436 | .6564 | 566 | 2163 | 2066 | 613 | 2070 | 2113 | 205  | 8.82  |
| 5000 | .92  | .35 | .65 | 613 | 2275 | 2113 | .3443 | .6557 | 571 | 2176 | 2071 | 613 | 2093 | 2113 | 182  | 6.93  |
| 5000 | .93  | .35 | .65 | 613 | 2275 | 2113 | .3451 | .6549 | 576 | 2188 | 2076 | 613 | 2116 | 2113 | 159  | 5.27  |
| 5000 | .94  | .35 | .65 | 613 | 2275 | 2113 | .3458 | .6542 | 582 | 2200 | 2082 | 613 | 2139 | 2113 | 137  | 3.85  |
| 5000 | .95  | .35 | .65 | 613 | 2275 | 2113 | .3465 | .6535 | 587 | 2213 | 2087 | 613 | 2161 | 2113 | 114  | 2.66  |
| 5000 | .96  | .35 | .65 | 613 | 2275 | 2113 | .3472 | .6528 | 592 | 2225 | 2092 | 613 | 2184 | 2113 | 91   | 1.69  |
| 5000 | .97  | .35 | .65 | 613 | 2275 | 2113 | .3479 | .6521 | 597 | 2238 | 2097 | 613 | 2207 | 2113 | 68   | .95   |
| 5000 | .98  | .35 | .65 | 613 | 2275 | 2113 | .3486 | .6514 | 602 | 2250 | 2102 | 613 | 2230 | 2113 | 46   | .42   |
| 5000 | .99  | .35 | .65 | 613 | 2275 | 2113 | .3493 | .6507 | 607 | 2263 | 2107 | 613 | 2252 | 2113 | 23   | .10   |
| 5000 | 1.00 | .35 | .65 | 613 | 2275 | 2113 | .3500 | .6500 | 613 | 2275 | 2113 | 613 | 2275 | 2113 | 0    | .00   |
| 5000 | 1.01 | .35 | .65 | 613 | 2275 | 2113 | .3507 | .6493 | 618 | 2287 | 2118 | 613 | 2298 | 2113 | -23  | .10   |
| 5000 | 1.02 | .35 | .65 | 613 | 2275 | 2113 | .3514 | .6486 | 623 | 2300 | 2123 | 613 | 2321 | 2113 | -46  | .41   |
| 5000 | 1.03 | .35 | .65 | 613 | 2275 | 2113 | .3520 | .6480 | 628 | 2312 | 2128 | 613 | 2343 | 2113 | -68  | .92   |
| 5000 | 1.04 | .35 | .65 | 613 | 2275 | 2113 | .3527 | .6473 | 633 | 2325 | 2133 | 613 | 2366 | 2113 | -91  | 1.62  |
| 5000 | 1.05 | .35 | .65 | 613 | 2275 | 2113 | .3533 | .6467 | 638 | 2337 | 2138 | 613 | 2389 | 2113 | -114 | 2.52  |
| 5000 | 1.06 | .35 | .65 | 613 | 2275 | 2113 | .3540 | .6460 | 644 | 2349 | 2144 | 613 | 2412 | 2113 | -137 | 3.61  |
| 5000 | 1.07 | .35 | .65 | 613 | 2275 | 2113 | .3546 | .6454 | 649 | 2362 | 2149 | 613 | 2434 | 2113 | -159 | 4.89  |
| 5000 | 1.08 | .35 | .65 | 613 | 2275 | 2113 | .3553 | .6447 | 654 | 2374 | 2154 | 613 | 2457 | 2113 | -182 | 6.35  |
| 5000 | 1.09 | .35 | .65 | 613 | 2275 | 2113 | .3559 | .6441 | 659 | 2386 | 2159 | 613 | 2480 | 2113 | -205 | 8.00  |
| 5000 | 1.10 | .35 | .65 | 613 | 2275 | 2113 | .3565 | .6435 | 664 | 2399 | 2164 | 613 | 2503 | 2113 | -228 | 9.82  |
| 5000 | 1.11 | .35 | .65 | 613 | 2275 | 2113 | .3571 | .6429 | 670 | 2411 | 2170 | 613 | 2525 | 2113 | -250 | 11.82 |
| 5000 | 1.12 | .35 | .65 | 613 | 2275 | 2113 | .3578 | .6422 | 675 | 2423 | 2175 | 613 | 2548 | 2113 | -273 | 14.00 |
| 5000 | 1.13 | .35 | .65 | 613 | 2275 | 2113 | .3584 | .6416 | 680 | 2435 | 2180 | 613 | 2571 | 2113 | -296 | 16.35 |
| 5000 | 1.14 | .35 | .65 | 613 | 2275 | 2113 | .3590 | .6410 | 685 | 2448 | 2185 | 613 | 2594 | 2113 | -319 | 18.86 |
| 5000 | 1.15 | .35 | .65 | 613 | 2275 | 2113 | .3596 | .6404 | 691 | 2460 | 2191 | 613 | 2616 | 2113 | -341 | 21.55 |
| 5000 | 1.16 | .35 | .65 | 613 | 2275 | 2113 | .3602 | .6398 | 696 | 2472 | 2196 | 613 | 2639 | 2113 | -364 | 24.40 |
| 5000 | 1.17 | .35 | .65 | 613 | 2275 | 2113 | .3608 | .6392 | 701 | 2485 | 2201 | 613 | 2662 | 2113 | -387 | 27.41 |
| 5000 | 1.18 | .35 | .65 | 613 | 2275 | 2113 | .3614 | .6386 | 706 | 2497 | 2206 | 613 | 2685 | 2113 | -410 | 30.58 |
| 5000 | 1.19 | .35 | .65 | 613 | 2275 | 2113 | .3619 | .6381 | 712 | 2509 | 2212 | 613 | 2707 | 2113 | -432 | 33.91 |
| 5000 | 1.20 | .35 | .65 | 613 | 2275 | 2113 | .3625 | .6375 | 717 | 2521 | 2217 | 613 | 2730 | 2113 | -455 | 37.39 |
| 5000 | .80  | .40 | .60 | 800 | 2400 | 1800 | .3894 | .6106 | 685 | 2149 | 1685 | 800 | 1920 | 1800 | 480  | 51.48 |
| 5000 | .81  | .40 | .60 | 800 | 2400 | 1800 | .3900 | .6100 | 691 | 2162 | 1691 | 800 | 1944 | 1800 | 456  | 46.19 |
| 5000 | .82  | .40 | .60 | 800 | 2400 | 1800 | .3905 | .6095 | 697 | 2175 | 1697 | 800 | 1968 | 1800 | 432  | 41.21 |

|      |      |     |     |     |      |      |       |       |     |      |      |     |      |      |      |       |
|------|------|-----|-----|-----|------|------|-------|-------|-----|------|------|-----|------|------|------|-------|
| 5000 | .83  | .40 | .60 | 800 | 2400 | 1800 | .3911 | .6089 | 702 | 2187 | 1702 | 800 | 1992 | 1800 | 408  | 36.55 |
| 5000 | .84  | .40 | .60 | 800 | 2400 | 1800 | .3917 | .6083 | 708 | 2200 | 1708 | 800 | 2016 | 1800 | 384  | 32.19 |
| 5000 | .85  | .40 | .60 | 800 | 2400 | 1800 | .3922 | .6078 | 714 | 2212 | 1714 | 800 | 2040 | 1800 | 360  | 28.13 |
| 5000 | .86  | .40 | .60 | 800 | 2400 | 1800 | .3928 | .6072 | 720 | 2225 | 1720 | 800 | 2064 | 1800 | 336  | 24.36 |
| 5000 | .87  | .40 | .60 | 800 | 2400 | 1800 | .3933 | .6067 | 725 | 2237 | 1725 | 800 | 2088 | 1800 | 312  | 20.89 |
| 5000 | .88  | .40 | .60 | 800 | 2400 | 1800 | .3939 | .6061 | 731 | 2250 | 1731 | 800 | 2112 | 1800 | 288  | 17.70 |
| 5000 | .89  | .40 | .60 | 800 | 2400 | 1800 | .3944 | .6056 | 737 | 2262 | 1737 | 800 | 2136 | 1800 | 264  | 14.79 |
| 5000 | .90  | .40 | .60 | 800 | 2400 | 1800 | .3950 | .6050 | 743 | 2275 | 1743 | 800 | 2160 | 1800 | 240  | 12.15 |
| 5000 | .91  | .40 | .60 | 800 | 2400 | 1800 | .3955 | .6045 | 748 | 2287 | 1748 | 800 | 2184 | 1800 | 216  | 9.79  |
| 5000 | .92  | .40 | .60 | 800 | 2400 | 1800 | .3960 | .6040 | 754 | 2300 | 1754 | 800 | 2208 | 1800 | 192  | 7.69  |
| 5000 | .93  | .40 | .60 | 800 | 2400 | 1800 | .3965 | .6035 | 760 | 2313 | 1760 | 800 | 2232 | 1800 | 168  | 5.86  |
| 5000 | .94  | .40 | .60 | 800 | 2400 | 1800 | .3970 | .6030 | 765 | 2325 | 1765 | 800 | 2256 | 1800 | 144  | 4.28  |
| 5000 | .95  | .40 | .60 | 800 | 2400 | 1800 | .3975 | .6025 | 771 | 2338 | 1771 | 800 | 2280 | 1800 | 120  | 2.96  |
| 5000 | .96  | .40 | .60 | 800 | 2400 | 1800 | .3980 | .6020 | 777 | 2350 | 1777 | 800 | 2304 | 1800 | 96   | 1.88  |
| 5000 | .97  | .40 | .60 | 800 | 2400 | 1800 | .3985 | .6015 | 783 | 2363 | 1783 | 800 | 2328 | 1800 | 72   | 1.05  |
| 5000 | .98  | .40 | .60 | 800 | 2400 | 1800 | .3990 | .6010 | 788 | 2375 | 1788 | 800 | 2352 | 1800 | 48   | .47   |
| 5000 | .99  | .40 | .60 | 800 | 2400 | 1800 | .3995 | .6005 | 794 | 2388 | 1794 | 800 | 2376 | 1800 | 24   | .12   |
| 5000 | 1.00 | .40 | .60 | 800 | 2400 | 1800 | .4000 | .6000 | 800 | 2400 | 1800 | 800 | 2400 | 1800 | 0    | .00   |
| 5000 | 1.01 | .40 | .60 | 800 | 2400 | 1800 | .4005 | .5995 | 806 | 2412 | 1806 | 800 | 2424 | 1800 | -24  | .11   |
| 5000 | 1.02 | .40 | .60 | 800 | 2400 | 1800 | .4010 | .5990 | 812 | 2425 | 1812 | 800 | 2448 | 1800 | -48  | .46   |
| 5000 | 1.03 | .40 | .60 | 800 | 2400 | 1800 | .4014 | .5986 | 817 | 2437 | 1817 | 800 | 2472 | 1800 | -72  | 1.02  |
| 5000 | 1.04 | .40 | .60 | 800 | 2400 | 1800 | .4019 | .5981 | 823 | 2450 | 1823 | 800 | 2496 | 1800 | -96  | 1.81  |
| 5000 | 1.05 | .40 | .60 | 800 | 2400 | 1800 | .4023 | .5977 | 829 | 2462 | 1829 | 800 | 2520 | 1800 | -120 | 2.81  |
| 5000 | 1.06 | .40 | .60 | 800 | 2400 | 1800 | .4028 | .5972 | 835 | 2475 | 1835 | 800 | 2544 | 1800 | -144 | 4.02  |
| 5000 | 1.07 | .40 | .60 | 800 | 2400 | 1800 | .4033 | .5967 | 840 | 2487 | 1840 | 800 | 2568 | 1800 | -168 | 5.45  |
| 5000 | 1.08 | .40 | .60 | 800 | 2400 | 1800 | .4037 | .5963 | 846 | 2500 | 1846 | 800 | 2592 | 1800 | -192 | 7.08  |
| 5000 | 1.09 | .40 | .60 | 800 | 2400 | 1800 | .4041 | .5959 | 852 | 2512 | 1852 | 800 | 2616 | 1800 | -216 | 8.92  |
| 5000 | 1.10 | .40 | .60 | 800 | 2400 | 1800 | .4046 | .5954 | 858 | 2525 | 1858 | 800 | 2640 | 1800 | -240 | 10.95 |
| 5000 | 1.11 | .40 | .60 | 800 | 2400 | 1800 | .4050 | .5950 | 863 | 2537 | 1863 | 800 | 2664 | 1800 | -264 | 13.19 |
| 5000 | 1.12 | .40 | .60 | 800 | 2400 | 1800 | .4054 | .5946 | 869 | 2549 | 1869 | 800 | 2688 | 1800 | -288 | 15.62 |
| 5000 | 1.13 | .40 | .60 | 800 | 2400 | 1800 | .4059 | .5941 | 875 | 2562 | 1875 | 800 | 2712 | 1800 | -312 | 18.24 |
| 5000 | 1.14 | .40 | .60 | 800 | 2400 | 1800 | .4063 | .5937 | 881 | 2574 | 1881 | 800 | 2736 | 1800 | -336 | 21.05 |
| 5000 | 1.15 | .40 | .60 | 800 | 2400 | 1800 | .4067 | .5933 | 887 | 2587 | 1887 | 800 | 2760 | 1800 | -360 | 24.05 |

|      |      |     |     |      |      |      |       |       |      |      |      |      |      |      |      |       |
|------|------|-----|-----|------|------|------|-------|-------|------|------|------|------|------|------|------|-------|
| 5000 | 1.16 | .40 | .60 | 800  | 2400 | 1800 | .4071 | .5929 | 892  | 2599 | 1892 | 800  | 2784 | 1800 | -384 | 27.24 |
| 5000 | 1.17 | .40 | .60 | 800  | 2400 | 1800 | .4075 | .5925 | 898  | 2612 | 1898 | 800  | 2808 | 1800 | -408 | 30.60 |
| 5000 | 1.18 | .40 | .60 | 800  | 2400 | 1800 | .4080 | .5920 | 904  | 2624 | 1904 | 800  | 2832 | 1800 | -432 | 34.15 |
| 5000 | 1.19 | .40 | .60 | 800  | 2400 | 1800 | .4084 | .5916 | 910  | 2636 | 1910 | 800  | 2856 | 1800 | -456 | 37.87 |
| 5000 | 1.20 | .40 | .60 | 800  | 2400 | 1800 | .4088 | .5912 | 916  | 2649 | 1916 | 800  | 2880 | 1800 | -480 | 41.77 |
| 5000 | .80  | .45 | .55 | 1013 | 2475 | 1513 | .4445 | .5555 | 890  | 2225 | 1390 | 1013 | 1980 | 1513 | 495  | 54.52 |
| 5000 | .81  | .45 | .55 | 1013 | 2475 | 1513 | .4448 | .5552 | 896  | 2237 | 1396 | 1013 | 2005 | 1513 | 470  | 48.93 |
| 5000 | .82  | .45 | .55 | 1013 | 2475 | 1513 | .4451 | .5549 | 902  | 2250 | 1402 | 1013 | 2030 | 1513 | 446  | 43.67 |
| 5000 | .83  | .45 | .55 | 1013 | 2475 | 1513 | .4454 | .5546 | 908  | 2262 | 1408 | 1013 | 2054 | 1513 | 421  | 38.74 |
| 5000 | .84  | .45 | .55 | 1013 | 2475 | 1513 | .4457 | .5543 | 915  | 2275 | 1415 | 1013 | 2079 | 1513 | 396  | 34.13 |
| 5000 | .85  | .45 | .55 | 1013 | 2475 | 1513 | .4460 | .5540 | 921  | 2287 | 1421 | 1013 | 2104 | 1513 | 371  | 29.83 |
| 5000 | .86  | .45 | .55 | 1013 | 2475 | 1513 | .4463 | .5537 | 927  | 2300 | 1427 | 1013 | 2129 | 1513 | 347  | 25.84 |
| 5000 | .87  | .45 | .55 | 1013 | 2475 | 1513 | .4466 | .5534 | 933  | 2312 | 1433 | 1013 | 2153 | 1513 | 322  | 22.16 |
| 5000 | .88  | .45 | .55 | 1013 | 2475 | 1513 | .4468 | .5532 | 939  | 2325 | 1439 | 1013 | 2178 | 1513 | 297  | 18.78 |
| 5000 | .89  | .45 | .55 | 1013 | 2475 | 1513 | .4471 | .5529 | 945  | 2337 | 1445 | 1013 | 2203 | 1513 | 272  | 15.70 |
| 5000 | .90  | .45 | .55 | 1013 | 2475 | 1513 | .4474 | .5526 | 951  | 2350 | 1451 | 1013 | 2228 | 1513 | 248  | 12.90 |
| 5000 | .91  | .45 | .55 | 1013 | 2475 | 1513 | .4477 | .5523 | 957  | 2362 | 1457 | 1013 | 2252 | 1513 | 223  | 10.40 |
| 5000 | .92  | .45 | .55 | 1013 | 2475 | 1513 | .4479 | .5521 | 964  | 2375 | 1464 | 1013 | 2277 | 1513 | 198  | 8.17  |
| 5000 | .93  | .45 | .55 | 1013 | 2475 | 1513 | .4482 | .5518 | 970  | 2387 | 1470 | 1013 | 2302 | 1513 | 173  | 6.22  |
| 5000 | .94  | .45 | .55 | 1013 | 2475 | 1513 | .4485 | .5515 | 976  | 2400 | 1476 | 1013 | 2327 | 1513 | 149  | 4.55  |
| 5000 | .95  | .45 | .55 | 1013 | 2475 | 1513 | .4487 | .5513 | 982  | 2412 | 1482 | 1013 | 2351 | 1513 | 124  | 3.14  |
| 5000 | .96  | .45 | .55 | 1013 | 2475 | 1513 | .4490 | .5510 | 988  | 2425 | 1488 | 1013 | 2376 | 1513 | 99   | 2.00  |
| 5000 | .97  | .45 | .55 | 1013 | 2475 | 1513 | .4492 | .5508 | 994  | 2437 | 1494 | 1013 | 2401 | 1513 | 74   | 1.12  |
| 5000 | .98  | .45 | .55 | 1013 | 2475 | 1513 | .4495 | .5505 | 1000 | 2450 | 1500 | 1013 | 2426 | 1513 | 50   | .50   |
| 5000 | .99  | .45 | .55 | 1013 | 2475 | 1513 | .4498 | .5502 | 1006 | 2463 | 1506 | 1013 | 2450 | 1513 | 25   | .12   |
| 5000 | 1.00 | .45 | .55 | 1013 | 2475 | 1513 | .4500 | .5500 | 1013 | 2475 | 1513 | 1013 | 2475 | 1513 | 0    | .00   |
| 5000 | 1.01 | .45 | .55 | 1013 | 2475 | 1513 | .4502 | .5498 | 1019 | 2487 | 1519 | 1013 | 2500 | 1513 | -25  | .12   |
| 5000 | 1.02 | .45 | .55 | 1013 | 2475 | 1513 | .4505 | .5495 | 1025 | 2500 | 1525 | 1013 | 2525 | 1513 | -50  | .49   |
| 5000 | 1.03 | .45 | .55 | 1013 | 2475 | 1513 | .4507 | .5493 | 1031 | 2512 | 1531 | 1013 | 2549 | 1513 | -74  | 1.09  |
| 5000 | 1.04 | .45 | .55 | 1013 | 2475 | 1513 | .4510 | .5490 | 1037 | 2525 | 1537 | 1013 | 2574 | 1513 | -99  | 1.92  |
| 5000 | 1.05 | .45 | .55 | 1013 | 2475 | 1513 | .4512 | .5488 | 1043 | 2537 | 1543 | 1013 | 2599 | 1513 | -124 | 2.99  |
| 5000 | 1.06 | .45 | .55 | 1013 | 2475 | 1513 | .4514 | .5486 | 1049 | 2550 | 1549 | 1013 | 2624 | 1513 | -149 | 4.28  |
| 5000 | 1.07 | .45 | .55 | 1013 | 2475 | 1513 | .4517 | .5483 | 1055 | 2562 | 1555 | 1013 | 2648 | 1513 | -173 | 5.80  |

|      |      |     |     |      |      |      |       |       |      |      |      |      |      |      |      |       |
|------|------|-----|-----|------|------|------|-------|-------|------|------|------|------|------|------|------|-------|
| 5000 | 1.08 | .45 | .55 | 1013 | 2475 | 1513 | .4519 | .5481 | 1062 | 2575 | 1562 | 1013 | 2673 | 1513 | -198 | 7.54  |
| 5000 | 1.09 | .45 | .55 | 1013 | 2475 | 1513 | .4521 | .5479 | 1068 | 2587 | 1568 | 1013 | 2698 | 1513 | -223 | 9.49  |
| 5000 | 1.10 | .45 | .55 | 1013 | 2475 | 1513 | .4524 | .5476 | 1074 | 2600 | 1574 | 1013 | 2723 | 1513 | -248 | 11.66 |
| 5000 | 1.11 | .45 | .55 | 1013 | 2475 | 1513 | .4526 | .5474 | 1080 | 2612 | 1580 | 1013 | 2747 | 1513 | -272 | 14.04 |
| 5000 | 1.12 | .45 | .55 | 1013 | 2475 | 1513 | .4528 | .5472 | 1086 | 2625 | 1586 | 1013 | 2772 | 1513 | -297 | 16.63 |
| 5000 | 1.13 | .45 | .55 | 1013 | 2475 | 1513 | .4530 | .5470 | 1092 | 2637 | 1592 | 1013 | 2797 | 1513 | -322 | 19.43 |
| 5000 | 1.14 | .45 | .55 | 1013 | 2475 | 1513 | .4532 | .5468 | 1098 | 2650 | 1598 | 1013 | 2822 | 1513 | -347 | 22.43 |
| 5000 | 1.15 | .45 | .55 | 1013 | 2475 | 1513 | .4535 | .5465 | 1104 | 2662 | 1604 | 1013 | 2846 | 1513 | -371 | 25.63 |
| 5000 | 1.16 | .45 | .55 | 1013 | 2475 | 1513 | .4537 | .5463 | 1111 | 2675 | 1611 | 1013 | 2871 | 1513 | -396 | 29.02 |
| 5000 | 1.17 | .45 | .55 | 1013 | 2475 | 1513 | .4539 | .5461 | 1117 | 2687 | 1617 | 1013 | 2896 | 1513 | -421 | 32.61 |
| 5000 | 1.18 | .45 | .55 | 1013 | 2475 | 1513 | .4541 | .5459 | 1123 | 2700 | 1623 | 1013 | 2921 | 1513 | -446 | 36.39 |
| 5000 | 1.19 | .45 | .55 | 1013 | 2475 | 1513 | .4543 | .5457 | 1129 | 2712 | 1629 | 1013 | 2945 | 1513 | -470 | 40.36 |
| 5000 | 1.20 | .45 | .55 | 1013 | 2475 | 1513 | .4545 | .5455 | 1135 | 2725 | 1635 | 1013 | 2970 | 1513 | -495 | 44.52 |
| 5000 | .80  | .50 | .50 | 1250 | 2500 | 1250 | .5000 | .5000 | 1125 | 2250 | 1125 | 1250 | 2000 | 1250 | 500  | 55.56 |
| 5000 | .81  | .50 | .50 | 1250 | 2500 | 1250 | .5000 | .5000 | 1131 | 2263 | 1131 | 1250 | 2025 | 1250 | 475  | 49.86 |
| 5000 | .82  | .50 | .50 | 1250 | 2500 | 1250 | .5000 | .5000 | 1138 | 2275 | 1138 | 1250 | 2050 | 1250 | 450  | 44.51 |
| 5000 | .83  | .50 | .50 | 1250 | 2500 | 1250 | .5000 | .5000 | 1144 | 2288 | 1144 | 1250 | 2075 | 1250 | 425  | 39.48 |
| 5000 | .84  | .50 | .50 | 1250 | 2500 | 1250 | .5000 | .5000 | 1150 | 2300 | 1150 | 1250 | 2100 | 1250 | 400  | 34.78 |
| 5000 | .85  | .50 | .50 | 1250 | 2500 | 1250 | .5000 | .5000 | 1156 | 2313 | 1156 | 1250 | 2125 | 1250 | 375  | 30.41 |
| 5000 | .86  | .50 | .50 | 1250 | 2500 | 1250 | .5000 | .5000 | 1163 | 2325 | 1163 | 1250 | 2150 | 1250 | 350  | 26.34 |
| 5000 | .87  | .50 | .50 | 1250 | 2500 | 1250 | .5000 | .5000 | 1169 | 2338 | 1169 | 1250 | 2175 | 1250 | 325  | 22.59 |
| 5000 | .88  | .50 | .50 | 1250 | 2500 | 1250 | .5000 | .5000 | 1175 | 2350 | 1175 | 1250 | 2200 | 1250 | 300  | 19.15 |
| 5000 | .89  | .50 | .50 | 1250 | 2500 | 1250 | .5000 | .5000 | 1181 | 2363 | 1181 | 1250 | 2225 | 1250 | 275  | 16.01 |
| 5000 | .90  | .50 | .50 | 1250 | 2500 | 1250 | .5000 | .5000 | 1188 | 2375 | 1188 | 1250 | 2250 | 1250 | 250  | 13.16 |
| 5000 | .91  | .50 | .50 | 1250 | 2500 | 1250 | .5000 | .5000 | 1194 | 2388 | 1194 | 1250 | 2275 | 1250 | 225  | 10.60 |
| 5000 | .92  | .50 | .50 | 1250 | 2500 | 1250 | .5000 | .5000 | 1200 | 2400 | 1200 | 1250 | 2300 | 1250 | 200  | 8.33  |
| 5000 | .93  | .50 | .50 | 1250 | 2500 | 1250 | .5000 | .5000 | 1206 | 2413 | 1206 | 1250 | 2325 | 1250 | 175  | 6.35  |
| 5000 | .94  | .50 | .50 | 1250 | 2500 | 1250 | .5000 | .5000 | 1213 | 2425 | 1213 | 1250 | 2350 | 1250 | 150  | 4.64  |
| 5000 | .95  | .50 | .50 | 1250 | 2500 | 1250 | .5000 | .5000 | 1219 | 2438 | 1219 | 1250 | 2375 | 1250 | 125  | 3.21  |
| 5000 | .96  | .50 | .50 | 1250 | 2500 | 1250 | .5000 | .5000 | 1225 | 2450 | 1225 | 1250 | 2400 | 1250 | 100  | 2.04  |
| 5000 | .97  | .50 | .50 | 1250 | 2500 | 1250 | .5000 | .5000 | 1231 | 2463 | 1231 | 1250 | 2425 | 1250 | 75   | 1.14  |
| 5000 | .98  | .50 | .50 | 1250 | 2500 | 1250 | .5000 | .5000 | 1238 | 2475 | 1238 | 1250 | 2450 | 1250 | 50   | .51   |
| 5000 | .99  | .50 | .50 | 1250 | 2500 | 1250 | .5000 | .5000 | 1244 | 2488 | 1244 | 1250 | 2475 | 1250 | 25   | .13   |

|      |      |     |     |      |      |      |       |       |      |      |      |      |      |      |      |       |
|------|------|-----|-----|------|------|------|-------|-------|------|------|------|------|------|------|------|-------|
| 5000 | 1.00 | .50 | .50 | 1250 | 2500 | 1250 | .5000 | .5000 | 1250 | 2500 | 1250 | 1250 | 2500 | 1250 | 0    | .00   |
| 5000 | 1.01 | .50 | .50 | 1250 | 2500 | 1250 | .5000 | .5000 | 1256 | 2513 | 1256 | 1250 | 2525 | 1250 | -25  | .12   |
| 5000 | 1.02 | .50 | .50 | 1250 | 2500 | 1250 | .5000 | .5000 | 1263 | 2525 | 1263 | 1250 | 2550 | 1250 | -50  | .50   |
| 5000 | 1.03 | .50 | .50 | 1250 | 2500 | 1250 | .5000 | .5000 | 1269 | 2538 | 1269 | 1250 | 2575 | 1250 | -75  | 1.11  |
| 5000 | 1.04 | .50 | .50 | 1250 | 2500 | 1250 | .5000 | .5000 | 1275 | 2550 | 1275 | 1250 | 2600 | 1250 | -100 | 1.96  |
| 5000 | 1.05 | .50 | .50 | 1250 | 2500 | 1250 | .5000 | .5000 | 1281 | 2563 | 1281 | 1250 | 2625 | 1250 | -125 | 3.05  |
| 5000 | 1.06 | .50 | .50 | 1250 | 2500 | 1250 | .5000 | .5000 | 1288 | 2575 | 1288 | 1250 | 2650 | 1250 | -150 | 4.37  |
| 5000 | 1.07 | .50 | .50 | 1250 | 2500 | 1250 | .5000 | .5000 | 1294 | 2588 | 1294 | 1250 | 2675 | 1250 | -175 | 5.92  |
| 5000 | 1.08 | .50 | .50 | 1250 | 2500 | 1250 | .5000 | .5000 | 1300 | 2600 | 1300 | 1250 | 2700 | 1250 | -200 | 7.69  |
| 5000 | 1.09 | .50 | .50 | 1250 | 2500 | 1250 | .5000 | .5000 | 1306 | 2613 | 1306 | 1250 | 2725 | 1250 | -225 | 9.69  |
| 5000 | 1.10 | .50 | .50 | 1250 | 2500 | 1250 | .5000 | .5000 | 1313 | 2625 | 1313 | 1250 | 2750 | 1250 | -250 | 11.90 |
| 5000 | 1.11 | .50 | .50 | 1250 | 2500 | 1250 | .5000 | .5000 | 1319 | 2638 | 1319 | 1250 | 2775 | 1250 | -275 | 14.34 |
| 5000 | 1.12 | .50 | .50 | 1250 | 2500 | 1250 | .5000 | .5000 | 1325 | 2650 | 1325 | 1250 | 2800 | 1250 | -300 | 16.98 |
| 5000 | 1.13 | .50 | .50 | 1250 | 2500 | 1250 | .5000 | .5000 | 1331 | 2663 | 1331 | 1250 | 2825 | 1250 | -325 | 19.84 |
| 5000 | 1.14 | .50 | .50 | 1250 | 2500 | 1250 | .5000 | .5000 | 1338 | 2675 | 1338 | 1250 | 2850 | 1250 | -350 | 22.90 |
| 5000 | 1.15 | .50 | .50 | 1250 | 2500 | 1250 | .5000 | .5000 | 1344 | 2688 | 1344 | 1250 | 2875 | 1250 | -375 | 26.16 |
| 5000 | 1.16 | .50 | .50 | 1250 | 2500 | 1250 | .5000 | .5000 | 1350 | 2700 | 1350 | 1250 | 2900 | 1250 | -400 | 29.63 |
| 5000 | 1.17 | .50 | .50 | 1250 | 2500 | 1250 | .5000 | .5000 | 1356 | 2713 | 1356 | 1250 | 2925 | 1250 | -425 | 33.29 |
| 5000 | 1.18 | .50 | .50 | 1250 | 2500 | 1250 | .5000 | .5000 | 1363 | 2725 | 1363 | 1250 | 2950 | 1250 | -450 | 37.16 |
| 5000 | 1.19 | .50 | .50 | 1250 | 2500 | 1250 | .5000 | .5000 | 1369 | 2738 | 1369 | 1250 | 2975 | 1250 | -475 | 41.21 |
| 5000 | 1.20 | .50 | .50 | 1250 | 2500 | 1250 | .5000 | .5000 | 1375 | 2750 | 1375 | 1250 | 3000 | 1250 | -500 | 45.45 |
| 5000 | .80  | .55 | .45 | 1513 | 2475 | 1013 | .5555 | .4445 | 1390 | 2225 | 890  | 1513 | 1980 | 1013 | 495  | 54.52 |
| 5000 | .81  | .55 | .45 | 1513 | 2475 | 1013 | .5552 | .4448 | 1396 | 2237 | 896  | 1513 | 2005 | 1013 | 470  | 48.93 |
| 5000 | .82  | .55 | .45 | 1513 | 2475 | 1013 | .5549 | .4451 | 1402 | 2250 | 902  | 1513 | 2030 | 1013 | 446  | 43.67 |
| 5000 | .83  | .55 | .45 | 1513 | 2475 | 1013 | .5546 | .4454 | 1408 | 2262 | 908  | 1513 | 2054 | 1013 | 421  | 38.74 |
| 5000 | .84  | .55 | .45 | 1513 | 2475 | 1013 | .5543 | .4457 | 1415 | 2275 | 915  | 1513 | 2079 | 1013 | 396  | 34.13 |
| 5000 | .85  | .55 | .45 | 1513 | 2475 | 1013 | .5540 | .4460 | 1421 | 2287 | 921  | 1513 | 2104 | 1013 | 371  | 29.83 |
| 5000 | .86  | .55 | .45 | 1513 | 2475 | 1013 | .5537 | .4463 | 1427 | 2300 | 927  | 1513 | 2129 | 1013 | 347  | 25.84 |
| 5000 | .87  | .55 | .45 | 1513 | 2475 | 1013 | .5534 | .4466 | 1433 | 2312 | 933  | 1513 | 2153 | 1013 | 322  | 22.16 |
| 5000 | .88  | .55 | .45 | 1513 | 2475 | 1013 | .5532 | .4468 | 1439 | 2325 | 939  | 1513 | 2178 | 1013 | 297  | 18.78 |
| 5000 | .89  | .55 | .45 | 1513 | 2475 | 1013 | .5529 | .4471 | 1445 | 2337 | 945  | 1513 | 2203 | 1013 | 272  | 15.70 |
| 5000 | .90  | .55 | .45 | 1513 | 2475 | 1013 | .5526 | .4474 | 1451 | 2350 | 951  | 1513 | 2228 | 1013 | 248  | 12.90 |
| 5000 | .91  | .55 | .45 | 1513 | 2475 | 1013 | .5523 | .4477 | 1457 | 2362 | 957  | 1513 | 2252 | 1013 | 223  | 10.40 |

|      |      |     |     |      |      |      |       |       |      |      |      |      |      |      |      |       |
|------|------|-----|-----|------|------|------|-------|-------|------|------|------|------|------|------|------|-------|
| 5000 | .92  | .55 | .45 | 1513 | 2475 | 1013 | .5521 | .4479 | 1464 | 2375 | 964  | 1513 | 2277 | 1013 | 198  | 8.17  |
| 5000 | .93  | .55 | .45 | 1513 | 2475 | 1013 | .5518 | .4482 | 1470 | 2387 | 970  | 1513 | 2302 | 1013 | 173  | 6.22  |
| 5000 | .94  | .55 | .45 | 1513 | 2475 | 1013 | .5515 | .4485 | 1476 | 2400 | 976  | 1513 | 2327 | 1013 | 149  | 4.55  |
| 5000 | .95  | .55 | .45 | 1513 | 2475 | 1013 | .5513 | .4487 | 1482 | 2412 | 982  | 1513 | 2351 | 1013 | 124  | 3.14  |
| 5000 | .96  | .55 | .45 | 1513 | 2475 | 1013 | .5510 | .4490 | 1488 | 2425 | 988  | 1513 | 2376 | 1013 | 99   | 2.00  |
| 5000 | .97  | .55 | .45 | 1513 | 2475 | 1013 | .5508 | .4492 | 1494 | 2437 | 994  | 1513 | 2401 | 1013 | 74   | 1.12  |
| 5000 | .98  | .55 | .45 | 1513 | 2475 | 1013 | .5505 | .4495 | 1500 | 2450 | 1000 | 1513 | 2426 | 1013 | 50   | .50   |
| 5000 | .99  | .55 | .45 | 1513 | 2475 | 1013 | .5502 | .4498 | 1506 | 2463 | 1006 | 1513 | 2450 | 1013 | 25   | .12   |
| 5000 | 1.00 | .55 | .45 | 1513 | 2475 | 1013 | .5500 | .4500 | 1513 | 2475 | 1013 | 1513 | 2475 | 1013 | 0    | .00   |
| 5000 | 1.01 | .55 | .45 | 1513 | 2475 | 1013 | .5498 | .4502 | 1519 | 2487 | 1019 | 1513 | 2500 | 1013 | -25  | .12   |
| 5000 | 1.02 | .55 | .45 | 1513 | 2475 | 1013 | .5495 | .4505 | 1525 | 2500 | 1025 | 1513 | 2525 | 1013 | -50  | .49   |
| 5000 | 1.03 | .55 | .45 | 1513 | 2475 | 1013 | .5493 | .4507 | 1531 | 2512 | 1031 | 1513 | 2549 | 1013 | -74  | 1.09  |
| 5000 | 1.04 | .55 | .45 | 1513 | 2475 | 1013 | .5490 | .4510 | 1537 | 2525 | 1037 | 1513 | 2574 | 1013 | -99  | 1.92  |
| 5000 | 1.05 | .55 | .45 | 1513 | 2475 | 1013 | .5488 | .4512 | 1543 | 2537 | 1043 | 1513 | 2599 | 1013 | -124 | 2.99  |
| 5000 | 1.06 | .55 | .45 | 1513 | 2475 | 1013 | .5486 | .4514 | 1549 | 2550 | 1049 | 1513 | 2624 | 1013 | -149 | 4.28  |
| 5000 | 1.07 | .55 | .45 | 1513 | 2475 | 1013 | .5483 | .4517 | 1555 | 2562 | 1055 | 1513 | 2648 | 1013 | -173 | 5.80  |
| 5000 | 1.08 | .55 | .45 | 1513 | 2475 | 1013 | .5481 | .4519 | 1562 | 2575 | 1062 | 1513 | 2673 | 1013 | -198 | 7.54  |
| 5000 | 1.09 | .55 | .45 | 1513 | 2475 | 1013 | .5479 | .4521 | 1568 | 2587 | 1068 | 1513 | 2698 | 1013 | -223 | 9.49  |
| 5000 | 1.10 | .55 | .45 | 1513 | 2475 | 1013 | .5476 | .4524 | 1574 | 2600 | 1074 | 1513 | 2723 | 1013 | -248 | 11.66 |
| 5000 | 1.11 | .55 | .45 | 1513 | 2475 | 1013 | .5474 | .4526 | 1580 | 2612 | 1080 | 1513 | 2747 | 1013 | -272 | 14.04 |
| 5000 | 1.12 | .55 | .45 | 1513 | 2475 | 1013 | .5472 | .4528 | 1586 | 2625 | 1086 | 1513 | 2772 | 1013 | -297 | 16.63 |
| 5000 | 1.13 | .55 | .45 | 1513 | 2475 | 1013 | .5470 | .4530 | 1592 | 2637 | 1092 | 1513 | 2797 | 1013 | -322 | 19.43 |
| 5000 | 1.14 | .55 | .45 | 1513 | 2475 | 1013 | .5468 | .4532 | 1598 | 2650 | 1098 | 1513 | 2822 | 1013 | -347 | 22.43 |
| 5000 | 1.15 | .55 | .45 | 1513 | 2475 | 1013 | .5465 | .4535 | 1604 | 2662 | 1104 | 1513 | 2846 | 1013 | -371 | 25.63 |
| 5000 | 1.16 | .55 | .45 | 1513 | 2475 | 1013 | .5463 | .4537 | 1611 | 2675 | 1111 | 1513 | 2871 | 1013 | -396 | 29.02 |
| 5000 | 1.17 | .55 | .45 | 1513 | 2475 | 1013 | .5461 | .4539 | 1617 | 2687 | 1117 | 1513 | 2896 | 1013 | -421 | 32.61 |
| 5000 | 1.18 | .55 | .45 | 1513 | 2475 | 1013 | .5459 | .4541 | 1623 | 2700 | 1123 | 1513 | 2921 | 1013 | -446 | 36.39 |
| 5000 | 1.19 | .55 | .45 | 1513 | 2475 | 1013 | .5457 | .4543 | 1629 | 2712 | 1129 | 1513 | 2945 | 1013 | -470 | 40.36 |
| 5000 | 1.20 | .55 | .45 | 1513 | 2475 | 1013 | .5455 | .4545 | 1635 | 2725 | 1135 | 1513 | 2970 | 1013 | -495 | 44.52 |
| 5000 | .80  | .60 | .40 | 1800 | 2400 | 800  | .6106 | .3894 | 1685 | 2149 | 685  | 1800 | 1920 | 800  | 480  | 51.48 |
| 5000 | .81  | .60 | .40 | 1800 | 2400 | 800  | .6100 | .3900 | 1691 | 2162 | 691  | 1800 | 1944 | 800  | 456  | 46.19 |
| 5000 | .82  | .60 | .40 | 1800 | 2400 | 800  | .6095 | .3905 | 1697 | 2175 | 697  | 1800 | 1968 | 800  | 432  | 41.21 |
| 5000 | .83  | .60 | .40 | 1800 | 2400 | 800  | .6089 | .3911 | 1702 | 2187 | 702  | 1800 | 1992 | 800  | 408  | 36.55 |

|      |      |     |     |      |      |     |       |       |      |      |     |      |      |     |      |       |
|------|------|-----|-----|------|------|-----|-------|-------|------|------|-----|------|------|-----|------|-------|
| 5000 | .84  | .60 | .40 | 1800 | 2400 | 800 | .6083 | .3917 | 1708 | 2200 | 708 | 1800 | 2016 | 800 | 384  | 32.19 |
| 5000 | .85  | .60 | .40 | 1800 | 2400 | 800 | .6078 | .3922 | 1714 | 2212 | 714 | 1800 | 2040 | 800 | 360  | 28.13 |
| 5000 | .86  | .60 | .40 | 1800 | 2400 | 800 | .6072 | .3928 | 1720 | 2225 | 720 | 1800 | 2064 | 800 | 336  | 24.36 |
| 5000 | .87  | .60 | .40 | 1800 | 2400 | 800 | .6067 | .3933 | 1725 | 2237 | 725 | 1800 | 2088 | 800 | 312  | 20.89 |
| 5000 | .88  | .60 | .40 | 1800 | 2400 | 800 | .6061 | .3939 | 1731 | 2250 | 731 | 1800 | 2112 | 800 | 288  | 17.70 |
| 5000 | .89  | .60 | .40 | 1800 | 2400 | 800 | .6056 | .3944 | 1737 | 2262 | 737 | 1800 | 2136 | 800 | 264  | 14.79 |
| 5000 | .90  | .60 | .40 | 1800 | 2400 | 800 | .6050 | .3950 | 1743 | 2275 | 743 | 1800 | 2160 | 800 | 240  | 12.15 |
| 5000 | .91  | .60 | .40 | 1800 | 2400 | 800 | .6045 | .3955 | 1748 | 2287 | 748 | 1800 | 2184 | 800 | 216  | 9.79  |
| 5000 | .92  | .60 | .40 | 1800 | 2400 | 800 | .6040 | .3960 | 1754 | 2300 | 754 | 1800 | 2208 | 800 | 192  | 7.69  |
| 5000 | .93  | .60 | .40 | 1800 | 2400 | 800 | .6035 | .3965 | 1760 | 2313 | 760 | 1800 | 2232 | 800 | 168  | 5.86  |
| 5000 | .94  | .60 | .40 | 1800 | 2400 | 800 | .6030 | .3970 | 1765 | 2325 | 765 | 1800 | 2256 | 800 | 144  | 4.28  |
| 5000 | .95  | .60 | .40 | 1800 | 2400 | 800 | .6025 | .3975 | 1771 | 2338 | 771 | 1800 | 2280 | 800 | 120  | 2.96  |
| 5000 | .96  | .60 | .40 | 1800 | 2400 | 800 | .6020 | .3980 | 1777 | 2350 | 777 | 1800 | 2304 | 800 | 96   | 1.88  |
| 5000 | .97  | .60 | .40 | 1800 | 2400 | 800 | .6015 | .3985 | 1783 | 2363 | 783 | 1800 | 2328 | 800 | 72   | 1.05  |
| 5000 | .98  | .60 | .40 | 1800 | 2400 | 800 | .6010 | .3990 | 1788 | 2375 | 788 | 1800 | 2352 | 800 | 48   | .47   |
| 5000 | .99  | .60 | .40 | 1800 | 2400 | 800 | .6005 | .3995 | 1794 | 2388 | 794 | 1800 | 2376 | 800 | 24   | .12   |
| 5000 | 1.00 | .60 | .40 | 1800 | 2400 | 800 | .6000 | .4000 | 1800 | 2400 | 800 | 1800 | 2400 | 800 | 0    | .00   |
| 5000 | 1.01 | .60 | .40 | 1800 | 2400 | 800 | .5995 | .4005 | 1806 | 2412 | 806 | 1800 | 2424 | 800 | -24  | .11   |
| 5000 | 1.02 | .60 | .40 | 1800 | 2400 | 800 | .5990 | .4010 | 1812 | 2425 | 812 | 1800 | 2448 | 800 | -48  | .46   |
| 5000 | 1.03 | .60 | .40 | 1800 | 2400 | 800 | .5986 | .4014 | 1817 | 2437 | 817 | 1800 | 2472 | 800 | -72  | 1.02  |
| 5000 | 1.04 | .60 | .40 | 1800 | 2400 | 800 | .5981 | .4019 | 1823 | 2450 | 823 | 1800 | 2496 | 800 | -96  | 1.81  |
| 5000 | 1.05 | .60 | .40 | 1800 | 2400 | 800 | .5977 | .4023 | 1829 | 2462 | 829 | 1800 | 2520 | 800 | -120 | 2.81  |
| 5000 | 1.06 | .60 | .40 | 1800 | 2400 | 800 | .5972 | .4028 | 1835 | 2475 | 835 | 1800 | 2544 | 800 | -144 | 4.02  |
| 5000 | 1.07 | .60 | .40 | 1800 | 2400 | 800 | .5967 | .4033 | 1840 | 2487 | 840 | 1800 | 2568 | 800 | -168 | 5.45  |
| 5000 | 1.08 | .60 | .40 | 1800 | 2400 | 800 | .5963 | .4037 | 1846 | 2500 | 846 | 1800 | 2592 | 800 | -192 | 7.08  |
| 5000 | 1.09 | .60 | .40 | 1800 | 2400 | 800 | .5959 | .4041 | 1852 | 2512 | 852 | 1800 | 2616 | 800 | -216 | 8.92  |
| 5000 | 1.10 | .60 | .40 | 1800 | 2400 | 800 | .5954 | .4046 | 1858 | 2525 | 858 | 1800 | 2640 | 800 | -240 | 10.95 |
| 5000 | 1.11 | .60 | .40 | 1800 | 2400 | 800 | .5950 | .4050 | 1863 | 2537 | 863 | 1800 | 2664 | 800 | -264 | 13.19 |
| 5000 | 1.12 | .60 | .40 | 1800 | 2400 | 800 | .5946 | .4054 | 1869 | 2549 | 869 | 1800 | 2688 | 800 | -288 | 15.62 |
| 5000 | 1.13 | .60 | .40 | 1800 | 2400 | 800 | .5941 | .4059 | 1875 | 2562 | 875 | 1800 | 2712 | 800 | -312 | 18.24 |
| 5000 | 1.14 | .60 | .40 | 1800 | 2400 | 800 | .5937 | .4063 | 1881 | 2574 | 881 | 1800 | 2736 | 800 | -336 | 21.05 |
| 5000 | 1.15 | .60 | .40 | 1800 | 2400 | 800 | .5933 | .4067 | 1887 | 2587 | 887 | 1800 | 2760 | 800 | -360 | 24.05 |
| 5000 | 1.16 | .60 | .40 | 1800 | 2400 | 800 | .5929 | .4071 | 1892 | 2599 | 892 | 1800 | 2784 | 800 | -384 | 27.24 |

|      |      |     |     |      |      |     |       |       |      |      |     |      |      |     |      |       |
|------|------|-----|-----|------|------|-----|-------|-------|------|------|-----|------|------|-----|------|-------|
| 5000 | 1.17 | .60 | .40 | 1800 | 2400 | 800 | .5925 | .4075 | 1898 | 2612 | 898 | 1800 | 2808 | 800 | -408 | 30.60 |
| 5000 | 1.18 | .60 | .40 | 1800 | 2400 | 800 | .5920 | .4080 | 1904 | 2624 | 904 | 1800 | 2832 | 800 | -432 | 34.15 |
| 5000 | 1.19 | .60 | .40 | 1800 | 2400 | 800 | .5916 | .4084 | 1910 | 2636 | 910 | 1800 | 2856 | 800 | -456 | 37.87 |
| 5000 | 1.20 | .60 | .40 | 1800 | 2400 | 800 | .5912 | .4088 | 1916 | 2649 | 916 | 1800 | 2880 | 800 | -480 | 41.77 |
| 5000 | .80  | .65 | .35 | 2113 | 2275 | 613 | .6650 | .3350 | 2010 | 2025 | 510 | 2113 | 1820 | 613 | 455  | 46.57 |
| 5000 | .81  | .65 | .35 | 2113 | 2275 | 613 | .6642 | .3358 | 2015 | 2038 | 515 | 2113 | 1843 | 613 | 432  | 41.76 |
| 5000 | .82  | .65 | .35 | 2113 | 2275 | 613 | .6634 | .3366 | 2020 | 2050 | 520 | 2113 | 1866 | 613 | 410  | 37.25 |
| 5000 | .83  | .65 | .35 | 2113 | 2275 | 613 | .6626 | .3374 | 2025 | 2063 | 525 | 2113 | 1888 | 613 | 387  | 33.02 |
| 5000 | .84  | .65 | .35 | 2113 | 2275 | 613 | .6618 | .3382 | 2030 | 2075 | 530 | 2113 | 1911 | 613 | 364  | 29.07 |
| 5000 | .85  | .65 | .35 | 2113 | 2275 | 613 | .6610 | .3390 | 2035 | 2088 | 535 | 2113 | 1934 | 613 | 341  | 25.39 |
| 5000 | .86  | .65 | .35 | 2113 | 2275 | 613 | .6602 | .3398 | 2041 | 2100 | 541 | 2113 | 1957 | 613 | 319  | 21.99 |
| 5000 | .87  | .65 | .35 | 2113 | 2275 | 613 | .6594 | .3406 | 2046 | 2113 | 546 | 2113 | 1979 | 613 | 296  | 18.84 |
| 5000 | .88  | .65 | .35 | 2113 | 2275 | 613 | .6587 | .3413 | 2051 | 2126 | 551 | 2113 | 2002 | 613 | 273  | 15.96 |
| 5000 | .89  | .65 | .35 | 2113 | 2275 | 613 | .6579 | .3421 | 2056 | 2138 | 556 | 2113 | 2025 | 613 | 250  | 13.33 |
| 5000 | .90  | .65 | .35 | 2113 | 2275 | 613 | .6572 | .3428 | 2061 | 2151 | 561 | 2113 | 2048 | 613 | 228  | 10.95 |
| 5000 | .91  | .65 | .35 | 2113 | 2275 | 613 | .6564 | .3436 | 2066 | 2163 | 566 | 2113 | 2070 | 613 | 205  | 8.82  |
| 5000 | .92  | .65 | .35 | 2113 | 2275 | 613 | .6557 | .3443 | 2071 | 2176 | 571 | 2113 | 2093 | 613 | 182  | 6.93  |
| 5000 | .93  | .65 | .35 | 2113 | 2275 | 613 | .6549 | .3451 | 2076 | 2188 | 576 | 2113 | 2116 | 613 | 159  | 5.27  |
| 5000 | .94  | .65 | .35 | 2113 | 2275 | 613 | .6542 | .3458 | 2082 | 2200 | 582 | 2113 | 2139 | 613 | 137  | 3.85  |
| 5000 | .95  | .65 | .35 | 2113 | 2275 | 613 | .6535 | .3465 | 2087 | 2213 | 587 | 2113 | 2161 | 613 | 114  | 2.66  |
| 5000 | .96  | .65 | .35 | 2113 | 2275 | 613 | .6528 | .3472 | 2092 | 2225 | 592 | 2113 | 2184 | 613 | 91   | 1.69  |
| 5000 | .97  | .65 | .35 | 2113 | 2275 | 613 | .6521 | .3479 | 2097 | 2238 | 597 | 2113 | 2207 | 613 | 68   | .95   |
| 5000 | .98  | .65 | .35 | 2113 | 2275 | 613 | .6514 | .3486 | 2102 | 2250 | 602 | 2113 | 2230 | 613 | 46   | .42   |
| 5000 | .99  | .65 | .35 | 2113 | 2275 | 613 | .6507 | .3493 | 2107 | 2263 | 607 | 2113 | 2252 | 613 | 23   | .10   |
| 5000 | 1.00 | .65 | .35 | 2113 | 2275 | 613 | .6500 | .3500 | 2113 | 2275 | 613 | 2113 | 2275 | 613 | 0    | .00   |
| 5000 | 1.01 | .65 | .35 | 2113 | 2275 | 613 | .6493 | .3507 | 2118 | 2287 | 618 | 2113 | 2298 | 613 | -23  | .10   |
| 5000 | 1.02 | .65 | .35 | 2113 | 2275 | 613 | .6486 | .3514 | 2123 | 2300 | 623 | 2113 | 2321 | 613 | -46  | .41   |
| 5000 | 1.03 | .65 | .35 | 2113 | 2275 | 613 | .6480 | .3520 | 2128 | 2312 | 628 | 2113 | 2343 | 613 | -68  | .92   |
| 5000 | 1.04 | .65 | .35 | 2113 | 2275 | 613 | .6473 | .3527 | 2133 | 2325 | 633 | 2113 | 2366 | 613 | -91  | 1.62  |
| 5000 | 1.05 | .65 | .35 | 2113 | 2275 | 613 | .6467 | .3533 | 2138 | 2337 | 638 | 2113 | 2389 | 613 | -114 | 2.52  |
| 5000 | 1.06 | .65 | .35 | 2113 | 2275 | 613 | .6460 | .3540 | 2144 | 2349 | 644 | 2113 | 2412 | 613 | -137 | 3.61  |
| 5000 | 1.07 | .65 | .35 | 2113 | 2275 | 613 | .6454 | .3546 | 2149 | 2362 | 649 | 2113 | 2434 | 613 | -159 | 4.89  |
| 5000 | 1.08 | .65 | .35 | 2113 | 2275 | 613 | .6447 | .3553 | 2154 | 2374 | 654 | 2113 | 2457 | 613 | -182 | 6.35  |



|      |      |     |     |      |      |     |       |       |      |      |     |      |      |     |      |       |
|------|------|-----|-----|------|------|-----|-------|-------|------|------|-----|------|------|-----|------|-------|
| 5000 | 1.09 | .65 | .35 | 2113 | 2275 | 613 | .6441 | .3559 | 2159 | 2386 | 659 | 2113 | 2480 | 613 | -205 | 8.00  |
| 5000 | 1.10 | .65 | .35 | 2113 | 2275 | 613 | .6435 | .3565 | 2164 | 2399 | 664 | 2113 | 2503 | 613 | -228 | 9.82  |
| 5000 | 1.11 | .65 | .35 | 2113 | 2275 | 613 | .6429 | .3571 | 2170 | 2411 | 670 | 2113 | 2525 | 613 | -250 | 11.82 |
| 5000 | 1.12 | .65 | .35 | 2113 | 2275 | 613 | .6422 | .3578 | 2175 | 2423 | 675 | 2113 | 2548 | 613 | -273 | 14.00 |
| 5000 | 1.13 | .65 | .35 | 2113 | 2275 | 613 | .6416 | .3584 | 2180 | 2435 | 680 | 2113 | 2571 | 613 | -296 | 16.35 |
| 5000 | 1.14 | .65 | .35 | 2113 | 2275 | 613 | .6410 | .3590 | 2185 | 2448 | 685 | 2113 | 2594 | 613 | -319 | 18.86 |
| 5000 | 1.15 | .65 | .35 | 2113 | 2275 | 613 | .6404 | .3596 | 2191 | 2460 | 691 | 2113 | 2616 | 613 | -341 | 21.55 |
| 5000 | 1.16 | .65 | .35 | 2113 | 2275 | 613 | .6398 | .3602 | 2196 | 2472 | 696 | 2113 | 2639 | 613 | -364 | 24.40 |
| 5000 | 1.17 | .65 | .35 | 2113 | 2275 | 613 | .6392 | .3608 | 2201 | 2485 | 701 | 2113 | 2662 | 613 | -387 | 27.41 |
| 5000 | 1.18 | .65 | .35 | 2113 | 2275 | 613 | .6386 | .3614 | 2206 | 2497 | 706 | 2113 | 2685 | 613 | -410 | 30.58 |
| 5000 | 1.19 | .65 | .35 | 2113 | 2275 | 613 | .6381 | .3619 | 2212 | 2509 | 712 | 2113 | 2707 | 613 | -432 | 33.91 |
| 5000 | 1.20 | .65 | .35 | 2113 | 2275 | 613 | .6375 | .3625 | 2217 | 2521 | 717 | 2113 | 2730 | 613 | -455 | 37.39 |
| 5000 | .80  | .70 | .30 | 2450 | 2100 | 450 | .7183 | .2817 | 2363 | 1853 | 363 | 2450 | 1680 | 450 | 420  | 40.05 |
| 5000 | .81  | .70 | .30 | 2450 | 2100 | 450 | .7173 | .2827 | 2368 | 1866 | 368 | 2450 | 1701 | 450 | 399  | 35.90 |
| 5000 | .82  | .70 | .30 | 2450 | 2100 | 450 | .7164 | .2836 | 2372 | 1878 | 372 | 2450 | 1722 | 450 | 378  | 32.00 |
| 5000 | .83  | .70 | .30 | 2450 | 2100 | 450 | .7154 | .2846 | 2376 | 1891 | 376 | 2450 | 1743 | 450 | 357  | 28.35 |
| 5000 | .84  | .70 | .30 | 2450 | 2100 | 450 | .7144 | .2856 | 2380 | 1903 | 380 | 2450 | 1764 | 450 | 336  | 24.94 |
| 5000 | .85  | .70 | .30 | 2450 | 2100 | 450 | .7134 | .2866 | 2385 | 1916 | 385 | 2450 | 1785 | 450 | 315  | 21.78 |
| 5000 | .86  | .70 | .30 | 2450 | 2100 | 450 | .7125 | .2875 | 2389 | 1928 | 389 | 2450 | 1806 | 450 | 294  | 18.85 |
| 5000 | .87  | .70 | .30 | 2450 | 2100 | 450 | .7116 | .2884 | 2393 | 1940 | 393 | 2450 | 1827 | 450 | 273  | 16.14 |
| 5000 | .88  | .70 | .30 | 2450 | 2100 | 450 | .7106 | .2894 | 2398 | 1953 | 398 | 2450 | 1848 | 450 | 252  | 13.67 |
| 5000 | .89  | .70 | .30 | 2450 | 2100 | 450 | .7097 | .2903 | 2402 | 1965 | 402 | 2450 | 1869 | 450 | 231  | 11.41 |
| 5000 | .90  | .70 | .30 | 2450 | 2100 | 450 | .7088 | .2912 | 2406 | 1977 | 406 | 2450 | 1890 | 450 | 210  | 9.37  |
| 5000 | .91  | .70 | .30 | 2450 | 2100 | 450 | .7079 | .2921 | 2411 | 1990 | 411 | 2450 | 1911 | 450 | 189  | 7.54  |
| 5000 | .92  | .70 | .30 | 2450 | 2100 | 450 | .7070 | .2930 | 2415 | 2002 | 415 | 2450 | 1932 | 450 | 168  | 5.92  |
| 5000 | .93  | .70 | .30 | 2450 | 2100 | 450 | .7061 | .2939 | 2419 | 2014 | 419 | 2450 | 1953 | 450 | 147  | 4.51  |
| 5000 | .94  | .70 | .30 | 2450 | 2100 | 450 | .7052 | .2948 | 2424 | 2027 | 424 | 2450 | 1974 | 450 | 126  | 3.29  |
| 5000 | .95  | .70 | .30 | 2450 | 2100 | 450 | .7043 | .2957 | 2428 | 2039 | 428 | 2450 | 1995 | 450 | 105  | 2.27  |
| 5000 | .96  | .70 | .30 | 2450 | 2100 | 450 | .7034 | .2966 | 2432 | 2051 | 432 | 2450 | 2016 | 450 | 84   | 1.44  |
| 5000 | .97  | .70 | .30 | 2450 | 2100 | 450 | .7026 | .2974 | 2437 | 2063 | 437 | 2450 | 2037 | 450 | 63   | .81   |
| 5000 | .98  | .70 | .30 | 2450 | 2100 | 450 | .7017 | .2983 | 2441 | 2076 | 441 | 2450 | 2058 | 450 | 42   | .36   |
| 5000 | .99  | .70 | .30 | 2450 | 2100 | 450 | .7008 | .2992 | 2446 | 2088 | 446 | 2450 | 2079 | 450 | 21   | .09   |
| 5000 | 1.00 | .70 | .30 | 2450 | 2100 | 450 | .7000 | .3000 | 2450 | 2100 | 450 | 2450 | 2100 | 450 | 0    | .00   |

|      |      |     |     |      |      |     |       |       |      |      |     |      |      |     |      |       |
|------|------|-----|-----|------|------|-----|-------|-------|------|------|-----|------|------|-----|------|-------|
| 5000 | 1.01 | .70 | .30 | 2450 | 2100 | 450 | .6992 | .3008 | 2454 | 2112 | 454 | 2450 | 2121 | 450 | -21  | .09   |
| 5000 | 1.02 | .70 | .30 | 2450 | 2100 | 450 | .6983 | .3017 | 2459 | 2124 | 459 | 2450 | 2142 | 450 | -42  | .35   |
| 5000 | 1.03 | .70 | .30 | 2450 | 2100 | 450 | .6975 | .3025 | 2463 | 2136 | 463 | 2450 | 2163 | 450 | -63  | .78   |
| 5000 | 1.04 | .70 | .30 | 2450 | 2100 | 450 | .6967 | .3033 | 2468 | 2149 | 468 | 2450 | 2184 | 450 | -84  | 1.38  |
| 5000 | 1.05 | .70 | .30 | 2450 | 2100 | 450 | .6959 | .3041 | 2472 | 2161 | 472 | 2450 | 2205 | 450 | -105 | 2.14  |
| 5000 | 1.06 | .70 | .30 | 2450 | 2100 | 450 | .6951 | .3049 | 2477 | 2173 | 477 | 2450 | 2226 | 450 | -126 | 3.07  |
| 5000 | 1.07 | .70 | .30 | 2450 | 2100 | 450 | .6943 | .3057 | 2481 | 2185 | 481 | 2450 | 2247 | 450 | -147 | 4.15  |
| 5000 | 1.08 | .70 | .30 | 2450 | 2100 | 450 | .6935 | .3065 | 2485 | 2197 | 485 | 2450 | 2268 | 450 | -168 | 5.40  |
| 5000 | 1.09 | .70 | .30 | 2450 | 2100 | 450 | .6927 | .3073 | 2490 | 2209 | 490 | 2450 | 2289 | 450 | -189 | 6.79  |
| 5000 | 1.10 | .70 | .30 | 2450 | 2100 | 450 | .6919 | .3081 | 2494 | 2221 | 494 | 2450 | 2310 | 450 | -210 | 8.34  |
| 5000 | 1.11 | .70 | .30 | 2450 | 2100 | 450 | .6912 | .3088 | 2499 | 2233 | 499 | 2450 | 2331 | 450 | -231 | 10.04 |
| 5000 | 1.12 | .70 | .30 | 2450 | 2100 | 450 | .6904 | .3096 | 2503 | 2245 | 503 | 2450 | 2352 | 450 | -252 | 11.89 |
| 5000 | 1.13 | .70 | .30 | 2450 | 2100 | 450 | .6896 | .3104 | 2508 | 2257 | 508 | 2450 | 2373 | 450 | -273 | 13.88 |
| 5000 | 1.14 | .70 | .30 | 2450 | 2100 | 450 | .6889 | .3111 | 2512 | 2269 | 512 | 2450 | 2394 | 450 | -294 | 16.01 |
| 5000 | 1.15 | .70 | .30 | 2450 | 2100 | 450 | .6881 | .3119 | 2517 | 2281 | 517 | 2450 | 2415 | 450 | -315 | 18.28 |
| 5000 | 1.16 | .70 | .30 | 2450 | 2100 | 450 | .6874 | .3126 | 2521 | 2293 | 521 | 2450 | 2436 | 450 | -336 | 20.70 |
| 5000 | 1.17 | .70 | .30 | 2450 | 2100 | 450 | .6867 | .3133 | 2526 | 2305 | 526 | 2450 | 2457 | 450 | -357 | 23.24 |
| 5000 | 1.18 | .70 | .30 | 2450 | 2100 | 450 | .6859 | .3141 | 2530 | 2317 | 530 | 2450 | 2478 | 450 | -378 | 25.93 |
| 5000 | 1.19 | .70 | .30 | 2450 | 2100 | 450 | .6852 | .3148 | 2535 | 2329 | 535 | 2450 | 2499 | 450 | -399 | 28.74 |
| 5000 | 1.20 | .70 | .30 | 2450 | 2100 | 450 | .6845 | .3155 | 2540 | 2341 | 540 | 2450 | 2520 | 450 | -420 | 31.69 |
| 5000 | .80  | .75 | .25 | 2813 | 1875 | 313 | .7703 | .2297 | 2744 | 1637 | 244 | 2813 | 1500 | 313 | 375  | 32.32 |
| 5000 | .81  | .75 | .25 | 2813 | 1875 | 313 | .7692 | .2308 | 2747 | 1649 | 247 | 2813 | 1519 | 313 | 356  | 28.94 |
| 5000 | .82  | .75 | .25 | 2813 | 1875 | 313 | .7681 | .2319 | 2751 | 1661 | 251 | 2813 | 1538 | 313 | 338  | 25.78 |
| 5000 | .83  | .75 | .25 | 2813 | 1875 | 313 | .7670 | .2330 | 2754 | 1673 | 254 | 2813 | 1556 | 313 | 319  | 22.82 |
| 5000 | .84  | .75 | .25 | 2813 | 1875 | 313 | .7660 | .2340 | 2757 | 1685 | 257 | 2813 | 1575 | 313 | 300  | 20.07 |
| 5000 | .85  | .75 | .25 | 2813 | 1875 | 313 | .7649 | .2351 | 2761 | 1697 | 261 | 2813 | 1594 | 313 | 281  | 17.51 |
| 5000 | .86  | .75 | .25 | 2813 | 1875 | 313 | .7639 | .2361 | 2764 | 1709 | 264 | 2813 | 1613 | 313 | 263  | 15.14 |
| 5000 | .87  | .75 | .25 | 2813 | 1875 | 313 | .7628 | .2372 | 2768 | 1721 | 268 | 2813 | 1631 | 313 | 244  | 12.96 |
| 5000 | .88  | .75 | .25 | 2813 | 1875 | 313 | .7618 | .2382 | 2771 | 1733 | 271 | 2813 | 1650 | 313 | 225  | 10.97 |
| 5000 | .89  | .75 | .25 | 2813 | 1875 | 313 | .7608 | .2392 | 2774 | 1745 | 274 | 2813 | 1669 | 313 | 206  | 9.15  |
| 5000 | .90  | .75 | .25 | 2813 | 1875 | 313 | .7597 | .2403 | 2778 | 1757 | 278 | 2813 | 1688 | 313 | 188  | 7.51  |
| 5000 | .91  | .75 | .25 | 2813 | 1875 | 313 | .7587 | .2413 | 2781 | 1769 | 281 | 2813 | 1706 | 313 | 169  | 6.04  |
| 5000 | .92  | .75 | .25 | 2813 | 1875 | 313 | .7577 | .2423 | 2785 | 1781 | 285 | 2813 | 1725 | 313 | 150  | 4.74  |

|      |      |     |     |      |      |     |       |       |      |      |     |      |      |     |      |       |
|------|------|-----|-----|------|------|-----|-------|-------|------|------|-----|------|------|-----|------|-------|
| 5000 | .93  | .75 | .25 | 2813 | 1875 | 313 | .7567 | .2433 | 2788 | 1793 | 288 | 2813 | 1744 | 313 | 131  | 3.61  |
| 5000 | .94  | .75 | .25 | 2813 | 1875 | 313 | .7558 | .2442 | 2792 | 1804 | 292 | 2813 | 1763 | 313 | 113  | 2.63  |
| 5000 | .95  | .75 | .25 | 2813 | 1875 | 313 | .7548 | .2452 | 2795 | 1816 | 295 | 2813 | 1781 | 313 | 94   | 1.82  |
| 5000 | .96  | .75 | .25 | 2813 | 1875 | 313 | .7538 | .2462 | 2799 | 1828 | 299 | 2813 | 1800 | 313 | 75   | 1.15  |
| 5000 | .97  | .75 | .25 | 2813 | 1875 | 313 | .7528 | .2472 | 2802 | 1840 | 302 | 2813 | 1819 | 313 | 56   | .64   |
| 5000 | .98  | .75 | .25 | 2813 | 1875 | 313 | .7519 | .2481 | 2805 | 1852 | 305 | 2813 | 1838 | 313 | 38   | .28   |
| 5000 | .99  | .75 | .25 | 2813 | 1875 | 313 | .7509 | .2491 | 2809 | 1863 | 309 | 2813 | 1856 | 313 | 19   | .07   |
| 5000 | 1.00 | .75 | .25 | 2813 | 1875 | 313 | .7500 | .2500 | 2813 | 1875 | 313 | 2813 | 1875 | 313 | 0    | .00   |
| 5000 | 1.01 | .75 | .25 | 2813 | 1875 | 313 | .7491 | .2509 | 2816 | 1887 | 316 | 2813 | 1894 | 313 | -19  | .07   |
| 5000 | 1.02 | .75 | .25 | 2813 | 1875 | 313 | .7481 | .2519 | 2820 | 1898 | 320 | 2813 | 1913 | 313 | -38  | .28   |
| 5000 | 1.03 | .75 | .25 | 2813 | 1875 | 313 | .7472 | .2528 | 2823 | 1910 | 323 | 2813 | 1931 | 313 | -56  | .62   |
| 5000 | 1.04 | .75 | .25 | 2813 | 1875 | 313 | .7463 | .2537 | 2827 | 1922 | 327 | 2813 | 1950 | 313 | -75  | 1.10  |
| 5000 | 1.05 | .75 | .25 | 2813 | 1875 | 313 | .7454 | .2546 | 2830 | 1933 | 330 | 2813 | 1969 | 313 | -94  | 1.70  |
| 5000 | 1.06 | .75 | .25 | 2813 | 1875 | 313 | .7445 | .2555 | 2834 | 1945 | 334 | 2813 | 1988 | 313 | -113 | 2.44  |
| 5000 | 1.07 | .75 | .25 | 2813 | 1875 | 313 | .7436 | .2564 | 2837 | 1957 | 337 | 2813 | 2006 | 313 | -131 | 3.30  |
| 5000 | 1.08 | .75 | .25 | 2813 | 1875 | 313 | .7427 | .2573 | 2841 | 1968 | 341 | 2813 | 2025 | 313 | -150 | 4.29  |
| 5000 | 1.09 | .75 | .25 | 2813 | 1875 | 313 | .7418 | .2582 | 2844 | 1980 | 344 | 2813 | 2044 | 313 | -169 | 5.40  |
| 5000 | 1.10 | .75 | .25 | 2813 | 1875 | 313 | .7410 | .2590 | 2848 | 1991 | 348 | 2813 | 2063 | 313 | -188 | 6.62  |
| 5000 | 1.11 | .75 | .25 | 2813 | 1875 | 313 | .7401 | .2599 | 2852 | 2003 | 352 | 2813 | 2081 | 313 | -206 | 7.97  |
| 5000 | 1.12 | .75 | .25 | 2813 | 1875 | 313 | .7392 | .2608 | 2855 | 2014 | 355 | 2813 | 2100 | 313 | -225 | 9.43  |
| 5000 | 1.13 | .75 | .25 | 2813 | 1875 | 313 | .7384 | .2616 | 2859 | 2026 | 359 | 2813 | 2119 | 313 | -244 | 11.01 |
| 5000 | 1.14 | .75 | .25 | 2813 | 1875 | 313 | .7375 | .2625 | 2863 | 2037 | 363 | 2813 | 2138 | 313 | -263 | 12.70 |
| 5000 | 1.15 | .75 | .25 | 2813 | 1875 | 313 | .7367 | .2633 | 2866 | 2049 | 366 | 2813 | 2156 | 313 | -281 | 14.50 |
| 5000 | 1.16 | .75 | .25 | 2813 | 1875 | 313 | .7358 | .2642 | 2870 | 2060 | 370 | 2813 | 2175 | 313 | -300 | 16.40 |
| 5000 | 1.17 | .75 | .25 | 2813 | 1875 | 313 | .7350 | .2650 | 2873 | 2072 | 373 | 2813 | 2194 | 313 | -319 | 18.42 |
| 5000 | 1.18 | .75 | .25 | 2813 | 1875 | 313 | .7342 | .2658 | 2877 | 2083 | 377 | 2813 | 2213 | 313 | -338 | 20.54 |
| 5000 | 1.19 | .75 | .25 | 2813 | 1875 | 313 | .7334 | .2666 | 2881 | 2095 | 381 | 2813 | 2231 | 313 | -356 | 22.76 |
| 5000 | 1.20 | .75 | .25 | 2813 | 1875 | 313 | .7326 | .2674 | 2884 | 2106 | 384 | 2813 | 2250 | 313 | -375 | 25.09 |
| 5000 | .80  | .80 | .20 | 3200 | 1600 | 200 | .8205 | .1795 | 3151 | 1378 | 151 | 3200 | 1280 | 200 | 320  | 23.88 |
| 5000 | .81  | .80 | .20 | 3200 | 1600 | 200 | .8194 | .1806 | 3153 | 1390 | 153 | 3200 | 1296 | 200 | 304  | 21.36 |
| 5000 | .82  | .80 | .20 | 3200 | 1600 | 200 | .8183 | .1817 | 3156 | 1401 | 156 | 3200 | 1312 | 200 | 288  | 19.01 |
| 5000 | .83  | .80 | .20 | 3200 | 1600 | 200 | .8173 | .1827 | 3158 | 1412 | 158 | 3200 | 1328 | 200 | 272  | 16.82 |
| 5000 | .84  | .80 | .20 | 3200 | 1600 | 200 | .8162 | .1838 | 3160 | 1423 | 160 | 3200 | 1344 | 200 | 256  | 14.77 |

|      |      |     |     |      |      |     |       |       |      |      |     |      |      |     |      |       |
|------|------|-----|-----|------|------|-----|-------|-------|------|------|-----|------|------|-----|------|-------|
| 5000 | .85  | .80 | .20 | 3200 | 1600 | 200 | .8151 | .1849 | 3163 | 1435 | 163 | 3200 | 1360 | 200 | 240  | 12.88 |
| 5000 | .86  | .80 | .20 | 3200 | 1600 | 200 | .8141 | .1859 | 3165 | 1446 | 165 | 3200 | 1376 | 200 | 224  | 11.13 |
| 5000 | .87  | .80 | .20 | 3200 | 1600 | 200 | .8130 | .1870 | 3168 | 1457 | 168 | 3200 | 1392 | 200 | 208  | 9.52  |
| 5000 | .88  | .80 | .20 | 3200 | 1600 | 200 | .8120 | .1880 | 3170 | 1468 | 170 | 3200 | 1408 | 200 | 192  | 8.05  |
| 5000 | .89  | .80 | .20 | 3200 | 1600 | 200 | .8109 | .1891 | 3172 | 1479 | 172 | 3200 | 1424 | 200 | 176  | 6.71  |
| 5000 | .90  | .80 | .20 | 3200 | 1600 | 200 | .8099 | .1901 | 3175 | 1490 | 175 | 3200 | 1440 | 200 | 160  | 5.50  |
| 5000 | .91  | .80 | .20 | 3200 | 1600 | 200 | .8089 | .1911 | 3177 | 1501 | 177 | 3200 | 1456 | 200 | 144  | 4.42  |
| 5000 | .92  | .80 | .20 | 3200 | 1600 | 200 | .8079 | .1921 | 3180 | 1512 | 180 | 3200 | 1472 | 200 | 128  | 3.47  |
| 5000 | .93  | .80 | .20 | 3200 | 1600 | 200 | .8069 | .1931 | 3182 | 1523 | 182 | 3200 | 1488 | 200 | 112  | 2.64  |
| 5000 | .94  | .80 | .20 | 3200 | 1600 | 200 | .8059 | .1941 | 3185 | 1534 | 185 | 3200 | 1504 | 200 | 96   | 1.92  |
| 5000 | .95  | .80 | .20 | 3200 | 1600 | 200 | .8049 | .1951 | 3187 | 1545 | 187 | 3200 | 1520 | 200 | 80   | 1.33  |
| 5000 | .96  | .80 | .20 | 3200 | 1600 | 200 | .8039 | .1961 | 3190 | 1556 | 190 | 3200 | 1536 | 200 | 64   | .84   |
| 5000 | .97  | .80 | .20 | 3200 | 1600 | 200 | .8029 | .1971 | 3192 | 1567 | 192 | 3200 | 1552 | 200 | 48   | .47   |
| 5000 | .98  | .80 | .20 | 3200 | 1600 | 200 | .8019 | .1981 | 3195 | 1578 | 195 | 3200 | 1568 | 200 | 32   | .21   |
| 5000 | .99  | .80 | .20 | 3200 | 1600 | 200 | .8010 | .1990 | 3197 | 1589 | 197 | 3200 | 1584 | 200 | 16   | .05   |
| 5000 | 1.00 | .80 | .20 | 3200 | 1600 | 200 | .8000 | .2000 | 3200 | 1600 | 200 | 3200 | 1600 | 200 | 0    | .00   |
| 5000 | 1.01 | .80 | .20 | 3200 | 1600 | 200 | .7990 | .2010 | 3203 | 1611 | 203 | 3200 | 1616 | 200 | -16  | .05   |
| 5000 | 1.02 | .80 | .20 | 3200 | 1600 | 200 | .7981 | .2019 | 3205 | 1622 | 205 | 3200 | 1632 | 200 | -32  | .20   |
| 5000 | 1.03 | .80 | .20 | 3200 | 1600 | 200 | .7971 | .2029 | 3208 | 1633 | 208 | 3200 | 1648 | 200 | -48  | .45   |
| 5000 | 1.04 | .80 | .20 | 3200 | 1600 | 200 | .7962 | .2038 | 3210 | 1643 | 210 | 3200 | 1664 | 200 | -64  | .80   |
| 5000 | 1.05 | .80 | .20 | 3200 | 1600 | 200 | .7953 | .2047 | 3213 | 1654 | 213 | 3200 | 1680 | 200 | -80  | 1.24  |
| 5000 | 1.06 | .80 | .20 | 3200 | 1600 | 200 | .7943 | .2057 | 3216 | 1665 | 216 | 3200 | 1696 | 200 | -96  | 1.77  |
| 5000 | 1.07 | .80 | .20 | 3200 | 1600 | 200 | .7934 | .2066 | 3218 | 1676 | 218 | 3200 | 1712 | 200 | -112 | 2.40  |
| 5000 | 1.08 | .80 | .20 | 3200 | 1600 | 200 | .7925 | .2075 | 3221 | 1686 | 221 | 3200 | 1728 | 200 | -128 | 3.11  |
| 5000 | 1.09 | .80 | .20 | 3200 | 1600 | 200 | .7916 | .2084 | 3223 | 1697 | 223 | 3200 | 1744 | 200 | -144 | 3.91  |
| 5000 | 1.10 | .80 | .20 | 3200 | 1600 | 200 | .7907 | .2093 | 3226 | 1708 | 226 | 3200 | 1760 | 200 | -160 | 4.80  |
| 5000 | 1.11 | .80 | .20 | 3200 | 1600 | 200 | .7898 | .2102 | 3229 | 1719 | 229 | 3200 | 1776 | 200 | -176 | 5.77  |
| 5000 | 1.12 | .80 | .20 | 3200 | 1600 | 200 | .7889 | .2111 | 3231 | 1729 | 231 | 3200 | 1792 | 200 | -192 | 6.83  |
| 5000 | 1.13 | .80 | .20 | 3200 | 1600 | 200 | .7880 | .2120 | 3234 | 1740 | 234 | 3200 | 1808 | 200 | -208 | 7.97  |
| 5000 | 1.14 | .80 | .20 | 3200 | 1600 | 200 | .7871 | .2129 | 3237 | 1751 | 237 | 3200 | 1824 | 200 | -224 | 9.19  |
| 5000 | 1.15 | .80 | .20 | 3200 | 1600 | 200 | .7863 | .2137 | 3239 | 1761 | 239 | 3200 | 1840 | 200 | -240 | 10.48 |
| 5000 | 1.16 | .80 | .20 | 3200 | 1600 | 200 | .7854 | .2146 | 3242 | 1772 | 242 | 3200 | 1856 | 200 | -256 | 11.86 |
| 5000 | 1.17 | .80 | .20 | 3200 | 1600 | 200 | .7845 | .2155 | 3245 | 1782 | 245 | 3200 | 1872 | 200 | -272 | 13.31 |

|      |      |     |     |      |      |     |       |       |      |      |     |      |      |     |      |       |
|------|------|-----|-----|------|------|-----|-------|-------|------|------|-----|------|------|-----|------|-------|
| 5000 | 1.18 | .80 | .20 | 3200 | 1600 | 200 | .7837 | .2163 | 3247 | 1793 | 247 | 3200 | 1888 | 200 | -288 | 14.84 |
| 5000 | 1.19 | .80 | .20 | 3200 | 1600 | 200 | .7828 | .2172 | 3250 | 1804 | 250 | 3200 | 1904 | 200 | -304 | 16.44 |
| 5000 | 1.20 | .80 | .20 | 3200 | 1600 | 200 | .7820 | .2180 | 3253 | 1814 | 253 | 3200 | 1920 | 200 | -320 | 18.12 |
| 5000 | .80  | .85 | .15 | 3613 | 1275 | 113 | .8688 | .1312 | 3582 | 1082 | 82  | 3613 | 1020 | 113 | 255  | 15.42 |
| 5000 | .81  | .85 | .15 | 3613 | 1275 | 113 | .8678 | .1322 | 3583 | 1092 | 83  | 3613 | 1033 | 113 | 242  | 13.78 |
| 5000 | .82  | .85 | .15 | 3613 | 1275 | 113 | .8668 | .1332 | 3585 | 1101 | 85  | 3613 | 1046 | 113 | 230  | 12.25 |
| 5000 | .83  | .85 | .15 | 3613 | 1275 | 113 | .8659 | .1341 | 3586 | 1111 | 86  | 3613 | 1058 | 113 | 217  | 10.83 |
| 5000 | .84  | .85 | .15 | 3613 | 1275 | 113 | .8649 | .1351 | 3588 | 1121 | 88  | 3613 | 1071 | 113 | 204  | 9.50  |
| 5000 | .85  | .85 | .15 | 3613 | 1275 | 113 | .8639 | .1361 | 3589 | 1131 | 89  | 3613 | 1084 | 113 | 191  | 8.28  |
| 5000 | .86  | .85 | .15 | 3613 | 1275 | 113 | .8630 | .1370 | 3591 | 1140 | 91  | 3613 | 1097 | 113 | 179  | 7.14  |
| 5000 | .87  | .85 | .15 | 3613 | 1275 | 113 | .8620 | .1380 | 3592 | 1150 | 92  | 3613 | 1109 | 113 | 166  | 6.11  |
| 5000 | .88  | .85 | .15 | 3613 | 1275 | 113 | .8610 | .1390 | 3594 | 1160 | 94  | 3613 | 1122 | 113 | 153  | 5.16  |
| 5000 | .89  | .85 | .15 | 3613 | 1275 | 113 | .8601 | .1399 | 3595 | 1170 | 95  | 3613 | 1135 | 113 | 140  | 4.30  |
| 5000 | .90  | .85 | .15 | 3613 | 1275 | 113 | .8592 | .1408 | 3597 | 1179 | 97  | 3613 | 1148 | 113 | 128  | 3.52  |
| 5000 | .91  | .85 | .15 | 3613 | 1275 | 113 | .8582 | .1418 | 3598 | 1189 | 98  | 3613 | 1160 | 113 | 115  | 2.83  |
| 5000 | .92  | .85 | .15 | 3613 | 1275 | 113 | .8573 | .1427 | 3600 | 1198 | 100 | 3613 | 1173 | 113 | 102  | 2.22  |
| 5000 | .93  | .85 | .15 | 3613 | 1275 | 113 | .8564 | .1436 | 3601 | 1208 | 101 | 3613 | 1186 | 113 | 89   | 1.68  |
| 5000 | .94  | .85 | .15 | 3613 | 1275 | 113 | .8554 | .1446 | 3603 | 1218 | 103 | 3613 | 1199 | 113 | 77   | 1.23  |
| 5000 | .95  | .85 | .15 | 3613 | 1275 | 113 | .8545 | .1455 | 3604 | 1227 | 104 | 3613 | 1211 | 113 | 64   | .84   |
| 5000 | .96  | .85 | .15 | 3613 | 1275 | 113 | .8536 | .1464 | 3606 | 1237 | 106 | 3613 | 1224 | 113 | 51   | .54   |
| 5000 | .97  | .85 | .15 | 3613 | 1275 | 113 | .8527 | .1473 | 3608 | 1246 | 108 | 3613 | 1237 | 113 | 38   | .30   |
| 5000 | .98  | .85 | .15 | 3613 | 1275 | 113 | .8518 | .1482 | 3609 | 1256 | 109 | 3613 | 1250 | 113 | 26   | .13   |
| 5000 | .99  | .85 | .15 | 3613 | 1275 | 113 | .8509 | .1491 | 3611 | 1265 | 111 | 3613 | 1262 | 113 | 13   | .03   |
| 5000 | 1.00 | .85 | .15 | 3613 | 1275 | 113 | .8500 | .1500 | 3613 | 1275 | 113 | 3613 | 1275 | 113 | 0    | .00   |
| 5000 | 1.01 | .85 | .15 | 3613 | 1275 | 113 | .8491 | .1509 | 3614 | 1284 | 114 | 3613 | 1288 | 113 | -13  | .03   |
| 5000 | 1.02 | .85 | .15 | 3613 | 1275 | 113 | .8482 | .1518 | 3616 | 1294 | 116 | 3613 | 1301 | 113 | -26  | .13   |
| 5000 | 1.03 | .85 | .15 | 3613 | 1275 | 113 | .8473 | .1527 | 3617 | 1303 | 117 | 3613 | 1313 | 113 | -38  | .29   |
| 5000 | 1.04 | .85 | .15 | 3613 | 1275 | 113 | .8465 | .1535 | 3619 | 1313 | 119 | 3613 | 1326 | 113 | -51  | .51   |
| 5000 | 1.05 | .85 | .15 | 3613 | 1275 | 113 | .8456 | .1544 | 3621 | 1322 | 121 | 3613 | 1339 | 113 | -64  | .78   |
| 5000 | 1.06 | .85 | .15 | 3613 | 1275 | 113 | .8447 | .1553 | 3622 | 1332 | 122 | 3613 | 1352 | 113 | -77  | 1.12  |
| 5000 | 1.07 | .85 | .15 | 3613 | 1275 | 113 | .8439 | .1561 | 3624 | 1341 | 124 | 3613 | 1364 | 113 | -89  | 1.52  |
| 5000 | 1.08 | .85 | .15 | 3613 | 1275 | 113 | .8430 | .1570 | 3626 | 1350 | 126 | 3613 | 1377 | 113 | -102 | 1.97  |
| 5000 | 1.09 | .85 | .15 | 3613 | 1275 | 113 | .8421 | .1579 | 3627 | 1360 | 127 | 3613 | 1390 | 113 | -115 | 2.47  |

|      |      |     |     |      |      |     |       |       |      |      |     |      |      |     |      |       |
|------|------|-----|-----|------|------|-----|-------|-------|------|------|-----|------|------|-----|------|-------|
| 5000 | 1.10 | .85 | .15 | 3613 | 1275 | 113 | .8413 | .1587 | 3629 | 1369 | 129 | 3613 | 1403 | 113 | -128 | 3.03  |
| 5000 | 1.11 | .85 | .15 | 3613 | 1275 | 113 | .8405 | .1595 | 3631 | 1379 | 131 | 3613 | 1415 | 113 | -140 | 3.64  |
| 5000 | 1.12 | .85 | .15 | 3613 | 1275 | 113 | .8396 | .1604 | 3633 | 1388 | 133 | 3613 | 1428 | 113 | -153 | 4.31  |
| 5000 | 1.13 | .85 | .15 | 3613 | 1275 | 113 | .8388 | .1612 | 3634 | 1397 | 134 | 3613 | 1441 | 113 | -166 | 5.02  |
| 5000 | 1.14 | .85 | .15 | 3613 | 1275 | 113 | .8379 | .1621 | 3636 | 1406 | 136 | 3613 | 1454 | 113 | -179 | 5.79  |
| 5000 | 1.15 | .85 | .15 | 3613 | 1275 | 113 | .8371 | .1629 | 3638 | 1416 | 138 | 3613 | 1466 | 113 | -191 | 6.60  |
| 5000 | 1.16 | .85 | .15 | 3613 | 1275 | 113 | .8363 | .1637 | 3639 | 1425 | 139 | 3613 | 1479 | 113 | -204 | 7.47  |
| 5000 | 1.17 | .85 | .15 | 3613 | 1275 | 113 | .8355 | .1645 | 3641 | 1434 | 141 | 3613 | 1492 | 113 | -217 | 8.38  |
| 5000 | 1.18 | .85 | .15 | 3613 | 1275 | 113 | .8346 | .1654 | 3643 | 1444 | 143 | 3613 | 1505 | 113 | -230 | 9.34  |
| 5000 | 1.19 | .85 | .15 | 3613 | 1275 | 113 | .8338 | .1662 | 3645 | 1453 | 145 | 3613 | 1517 | 113 | -242 | 10.34 |
| 5000 | 1.20 | .85 | .15 | 3613 | 1275 | 113 | .8330 | .1670 | 3647 | 1462 | 147 | 3613 | 1530 | 113 | -255 | 11.39 |
| 5000 | .80  | .90 | .10 | 4050 | 900  | 50  | .9149 | .0851 | 4035 | 750  | 35  | 4050 | 720  | 50  | 180  | 7.84  |
| 5000 | .81  | .90 | .10 | 4050 | 900  | 50  | .9142 | .0858 | 4036 | 758  | 36  | 4050 | 729  | 50  | 171  | 6.99  |
| 5000 | .82  | .90 | .10 | 4050 | 900  | 50  | .9134 | .0866 | 4036 | 765  | 36  | 4050 | 738  | 50  | 162  | 6.21  |
| 5000 | .83  | .90 | .10 | 4050 | 900  | 50  | .9126 | .0874 | 4037 | 773  | 37  | 4050 | 747  | 50  | 153  | 5.48  |
| 5000 | .84  | .90 | .10 | 4050 | 900  | 50  | .9119 | .0881 | 4038 | 781  | 38  | 4050 | 756  | 50  | 144  | 4.81  |
| 5000 | .85  | .90 | .10 | 4050 | 900  | 50  | .9111 | .0889 | 4038 | 788  | 38  | 4050 | 765  | 50  | 135  | 4.18  |
| 5000 | .86  | .90 | .10 | 4050 | 900  | 50  | .9103 | .0897 | 4039 | 796  | 39  | 4050 | 774  | 50  | 126  | 3.60  |
| 5000 | .87  | .90 | .10 | 4050 | 900  | 50  | .9096 | .0904 | 4040 | 803  | 40  | 4050 | 783  | 50  | 117  | 3.08  |
| 5000 | .88  | .90 | .10 | 4050 | 900  | 50  | .9088 | .0912 | 4041 | 811  | 41  | 4050 | 792  | 50  | 108  | 2.60  |
| 5000 | .89  | .90 | .10 | 4050 | 900  | 50  | .9081 | .0919 | 4041 | 818  | 41  | 4050 | 801  | 50  | 99   | 2.16  |
| 5000 | .90  | .90 | .10 | 4050 | 900  | 50  | .9073 | .0927 | 4042 | 826  | 42  | 4050 | 810  | 50  | 90   | 1.77  |
| 5000 | .91  | .90 | .10 | 4050 | 900  | 50  | .9066 | .0934 | 4043 | 833  | 43  | 4050 | 819  | 50  | 81   | 1.42  |
| 5000 | .92  | .90 | .10 | 4050 | 900  | 50  | .9058 | .0942 | 4044 | 841  | 44  | 4050 | 828  | 50  | 72   | 1.11  |
| 5000 | .93  | .90 | .10 | 4050 | 900  | 50  | .9051 | .0949 | 4044 | 848  | 44  | 4050 | 837  | 50  | 63   | .84   |
| 5000 | .94  | .90 | .10 | 4050 | 900  | 50  | .9044 | .0956 | 4045 | 856  | 45  | 4050 | 846  | 50  | 54   | .61   |
| 5000 | .95  | .90 | .10 | 4050 | 900  | 50  | .9036 | .0964 | 4046 | 863  | 46  | 4050 | 855  | 50  | 45   | .42   |
| 5000 | .96  | .90 | .10 | 4050 | 900  | 50  | .9029 | .0971 | 4047 | 870  | 47  | 4050 | 864  | 50  | 36   | .27   |
| 5000 | .97  | .90 | .10 | 4050 | 900  | 50  | .9022 | .0978 | 4048 | 878  | 48  | 4050 | 873  | 50  | 27   | .15   |
| 5000 | .98  | .90 | .10 | 4050 | 900  | 50  | .9014 | .0986 | 4048 | 885  | 48  | 4050 | 882  | 50  | 18   | .07   |
| 5000 | .99  | .90 | .10 | 4050 | 900  | 50  | .9007 | .0993 | 4049 | 893  | 49  | 4050 | 891  | 50  | 9    | .02   |
| 5000 | 1.00 | .90 | .10 | 4050 | 900  | 50  | .9000 | .1000 | 4050 | 900  | 50  | 4050 | 900  | 50  | 0    | .00   |
| 5000 | 1.01 | .90 | .10 | 4050 | 900  | 50  | .8993 | .1007 | 4051 | 907  | 51  | 4050 | 909  | 50  | -9   | .02   |

|      |      |     |     |      |     |    |       |       |      |      |    |      |      |    |      |      |
|------|------|-----|-----|------|-----|----|-------|-------|------|------|----|------|------|----|------|------|
| 5000 | 1.02 | .90 | .10 | 4050 | 900 | 50 | .8986 | .1014 | 4052 | 915  | 52 | 4050 | 918  | 50 | -18  | .06  |
| 5000 | 1.03 | .90 | .10 | 4050 | 900 | 50 | .8979 | .1021 | 4052 | 922  | 52 | 4050 | 927  | 50 | -27  | .14  |
| 5000 | 1.04 | .90 | .10 | 4050 | 900 | 50 | .8971 | .1029 | 4053 | 929  | 53 | 4050 | 936  | 50 | -36  | .25  |
| 5000 | 1.05 | .90 | .10 | 4050 | 900 | 50 | .8964 | .1036 | 4054 | 937  | 54 | 4050 | 945  | 50 | -45  | .39  |
| 5000 | 1.06 | .90 | .10 | 4050 | 900 | 50 | .8957 | .1043 | 4055 | 944  | 55 | 4050 | 954  | 50 | -54  | .56  |
| 5000 | 1.07 | .90 | .10 | 4050 | 900 | 50 | .8950 | .1050 | 4056 | 951  | 56 | 4050 | 963  | 50 | -63  | .75  |
| 5000 | 1.08 | .90 | .10 | 4050 | 900 | 50 | .8943 | .1057 | 4057 | 959  | 57 | 4050 | 972  | 50 | -72  | .97  |
| 5000 | 1.09 | .90 | .10 | 4050 | 900 | 50 | .8936 | .1064 | 4057 | 966  | 57 | 4050 | 981  | 50 | -81  | 1.22 |
| 5000 | 1.10 | .90 | .10 | 4050 | 900 | 50 | .8929 | .1071 | 4058 | 973  | 58 | 4050 | 990  | 50 | -90  | 1.50 |
| 5000 | 1.11 | .90 | .10 | 4050 | 900 | 50 | .8922 | .1078 | 4059 | 981  | 59 | 4050 | 999  | 50 | -99  | 1.80 |
| 5000 | 1.12 | .90 | .10 | 4050 | 900 | 50 | .8915 | .1085 | 4060 | 988  | 60 | 4050 | 1008 | 50 | -108 | 2.13 |
| 5000 | 1.13 | .90 | .10 | 4050 | 900 | 50 | .8909 | .1091 | 4061 | 995  | 61 | 4050 | 1017 | 50 | -117 | 2.48 |
| 5000 | 1.14 | .90 | .10 | 4050 | 900 | 50 | .8902 | .1098 | 4062 | 1002 | 62 | 4050 | 1026 | 50 | -126 | 2.86 |
| 5000 | 1.15 | .90 | .10 | 4050 | 900 | 50 | .8895 | .1105 | 4063 | 1010 | 63 | 4050 | 1035 | 50 | -135 | 3.26 |
| 5000 | 1.16 | .90 | .10 | 4050 | 900 | 50 | .8888 | .1112 | 4064 | 1017 | 64 | 4050 | 1044 | 50 | -144 | 3.68 |
| 5000 | 1.17 | .90 | .10 | 4050 | 900 | 50 | .8881 | .1119 | 4064 | 1024 | 64 | 4050 | 1053 | 50 | -153 | 4.13 |
| 5000 | 1.18 | .90 | .10 | 4050 | 900 | 50 | .8874 | .1126 | 4065 | 1031 | 65 | 4050 | 1062 | 50 | -162 | 4.60 |
| 5000 | 1.19 | .90 | .10 | 4050 | 900 | 50 | .8868 | .1132 | 4066 | 1038 | 66 | 4050 | 1071 | 50 | -171 | 5.09 |
| 5000 | 1.20 | .90 | .10 | 4050 | 900 | 50 | .8861 | .1139 | 4067 | 1046 | 67 | 4050 | 1080 | 50 | -180 | 5.61 |
| 5000 | .80  | .95 | .05 | 4513 | 475 | 13 | .9587 | .0413 | 4508 | 388  | 8  | 4513 | 380  | 13 | 95   | 2.23 |
| 5000 | .81  | .95 | .05 | 4513 | 475 | 13 | .9583 | .0417 | 4509 | 393  | 9  | 4513 | 385  | 13 | 90   | 1.99 |
| 5000 | .82  | .95 | .05 | 4513 | 475 | 13 | .9578 | .0422 | 4509 | 397  | 9  | 4513 | 390  | 13 | 86   | 1.76 |
| 5000 | .83  | .95 | .05 | 4513 | 475 | 13 | .9574 | .0426 | 4509 | 401  | 9  | 4513 | 394  | 13 | 81   | 1.55 |
| 5000 | .84  | .95 | .05 | 4513 | 475 | 13 | .9569 | .0431 | 4509 | 406  | 9  | 4513 | 399  | 13 | 76   | 1.36 |
| 5000 | .85  | .95 | .05 | 4513 | 475 | 13 | .9565 | .0435 | 4509 | 410  | 9  | 4513 | 404  | 13 | 71   | 1.18 |
| 5000 | .86  | .95 | .05 | 4513 | 475 | 13 | .9561 | .0439 | 4510 | 414  | 10 | 4513 | 409  | 13 | 67   | 1.02 |
| 5000 | .87  | .95 | .05 | 4513 | 475 | 13 | .9556 | .0444 | 4510 | 419  | 10 | 4513 | 413  | 13 | 62   | .87  |
| 5000 | .88  | .95 | .05 | 4513 | 475 | 13 | .9552 | .0448 | 4510 | 423  | 10 | 4513 | 418  | 13 | 57   | .73  |
| 5000 | .89  | .95 | .05 | 4513 | 475 | 13 | .9548 | .0452 | 4510 | 427  | 10 | 4513 | 423  | 13 | 52   | .61  |
| 5000 | .90  | .95 | .05 | 4513 | 475 | 13 | .9543 | .0457 | 4510 | 432  | 10 | 4513 | 428  | 13 | 48   | .50  |
| 5000 | .91  | .95 | .05 | 4513 | 475 | 13 | .9539 | .0461 | 4511 | 436  | 11 | 4513 | 432  | 13 | 43   | .40  |
| 5000 | .92  | .95 | .05 | 4513 | 475 | 13 | .9534 | .0466 | 4511 | 440  | 11 | 4513 | 437  | 13 | 38   | .31  |
| 5000 | .93  | .95 | .05 | 4513 | 475 | 13 | .9530 | .0470 | 4511 | 445  | 11 | 4513 | 442  | 13 | 33   | .24  |

|      |      |      |     |      |     |    |            |       |      |     |    |      |     |    |     |      |
|------|------|------|-----|------|-----|----|------------|-------|------|-----|----|------|-----|----|-----|------|
| 5000 | .94  | .95  | .05 | 4513 | 475 | 13 | .9526      | .0474 | 4511 | 449 | 11 | 4513 | 447 | 13 | 29  | .17  |
| 5000 | .95  | .95  | .05 | 4513 | 475 | 13 | .9521      | .0479 | 4511 | 453 | 11 | 4513 | 451 | 13 | 24  | .12  |
| 5000 | .96  | .95  | .05 | 4513 | 475 | 13 | .9517      | .0483 | 4512 | 458 | 12 | 4513 | 456 | 13 | 19  | .07  |
| 5000 | .97  | .95  | .05 | 4513 | 475 | 13 | .9513      | .0487 | 4512 | 462 | 12 | 4513 | 461 | 13 | 14  | .04  |
| 5000 | .98  | .95  | .05 | 4513 | 475 | 13 | .9509      | .0491 | 4512 | 466 | 12 | 4513 | 466 | 13 | 10  | .02  |
| 5000 | .99  | .95  | .05 | 4513 | 475 | 13 | .9504      | .0496 | 4512 | 471 | 12 | 4513 | 470 | 13 | 5   | .00  |
| 5000 | 1.00 | .95  | .05 | 4513 | 475 | 13 | .9500      | .0500 | 4513 | 475 | 13 | 4513 | 475 | 13 | 0   | .00  |
| 5000 | 1.01 | .95  | .05 | 4513 | 475 | 13 | .9496      | .0504 | 4513 | 479 | 13 | 4513 | 480 | 13 | -5  | .00  |
| 5000 | 1.02 | .95  | .05 | 4513 | 475 | 13 | .9491      | .0509 | 4513 | 484 | 13 | 4513 | 485 | 13 | -10 | .02  |
| 5000 | 1.03 | .95  | .05 | 4513 | 475 | 13 | .9487      | .0513 | 4513 | 488 | 13 | 4513 | 489 | 13 | -14 | .04  |
| 5000 | 1.04 | .95  | .05 | 4513 | 475 | 13 | .9483      | .0517 | 4513 | 492 | 13 | 4513 | 494 | 13 | -19 | .07  |
| 5000 | 1.05 | .95  | .05 | 4513 | 475 | 13 | .9479      | .0521 | 4514 | 496 | 14 | 4513 | 499 | 13 | -24 | .11  |
| 5000 | 1.06 | .95  | .05 | 4513 | 475 | 13 | .9474      | .0526 | 4514 | 501 | 14 | 4513 | 504 | 13 | -29 | .15  |
| 5000 | 1.07 | .95  | .05 | 4513 | 475 | 13 | .9470      | .0530 | 4514 | 505 | 14 | 4513 | 508 | 13 | -33 | .21  |
| 5000 | 1.08 | .95  | .05 | 4513 | 475 | 13 | .9466      | .0534 | 4514 | 509 | 14 | 4513 | 513 | 13 | -38 | .27  |
| 5000 | 1.09 | .95  | .05 | 4513 | 475 | 13 | .9462      | .0538 | 4515 | 514 | 15 | 4513 | 518 | 13 | -43 | .34  |
| 5000 | 1.10 | .95  | .05 | 4513 | 475 | 13 | .9458      | .0542 | 4515 | 518 | 15 | 4513 | 523 | 13 | -48 | .41  |
| 5000 | 1.11 | .95  | .05 | 4513 | 475 | 13 | .9453      | .0547 | 4515 | 522 | 15 | 4513 | 527 | 13 | -52 | .50  |
| 5000 | 1.12 | .95  | .05 | 4513 | 475 | 13 | .9449      | .0551 | 4515 | 526 | 15 | 4513 | 532 | 13 | -57 | .59  |
| 5000 | 1.13 | .95  | .05 | 4513 | 475 | 13 | .9445      | .0555 | 4516 | 531 | 16 | 4513 | 537 | 13 | -62 | .68  |
| 5000 | 1.14 | .95  | .05 | 4513 | 475 | 13 | .9441      | .0559 | 4516 | 535 | 16 | 4513 | 542 | 13 | -67 | .79  |
| 5000 | 1.15 | .95  | .05 | 4513 | 475 | 13 | .9437      | .0563 | 4516 | 539 | 16 | 4513 | 546 | 13 | -71 | .90  |
| 5000 | 1.16 | .95  | .05 | 4513 | 475 | 13 | .9433      | .0567 | 4516 | 543 | 16 | 4513 | 551 | 13 | -76 | 1.01 |
| 5000 | 1.17 | .95  | .05 | 4513 | 475 | 13 | .9428      | .0572 | 4517 | 548 | 17 | 4513 | 556 | 13 | -81 | 1.14 |
| 5000 | 1.18 | .95  | .05 | 4513 | 475 | 13 | .9424      | .0576 | 4517 | 552 | 17 | 4513 | 561 | 13 | -86 | 1.27 |
| 5000 | 1.19 | .95  | .05 | 4513 | 475 | 13 | .9420      | .0580 | 4517 | 556 | 17 | 4513 | 565 | 13 | -90 | 1.40 |
| 5000 | 1.20 | .95  | .05 | 4513 | 475 | 13 | .9416      | .0584 | 4517 | 560 | 17 | 4513 | 570 | 13 | -95 | 1.54 |
| 5000 | .80  | 1.00 | .00 | 5000 | 0   | 0  | 1.000<br>0 | .0000 | 5000 | 0   | 0  | 5000 | 0   | 0  | 0   | 1.54 |
| 5000 | .81  | 1.00 | .00 | 5000 | 0   | 0  | 1.000<br>0 | .0000 | 5000 | 0   | 0  | 5000 | 0   | 0  | 0   | 1.54 |
| 5000 | .82  | 1.00 | .00 | 5000 | 0   | 0  | 1.000<br>0 | .0000 | 5000 | 0   | 0  | 5000 | 0   | 0  | 0   | 1.54 |



|      |     |      |     |      |   |   |            |       |      |   |   |      |   |   |   |      |
|------|-----|------|-----|------|---|---|------------|-------|------|---|---|------|---|---|---|------|
| 5000 | .83 | 1.00 | .00 | 5000 | 0 | 0 | 1.000<br>0 | .0000 | 5000 | 0 | 0 | 5000 | 0 | 0 | 0 | 1.54 |
| 5000 | .84 | 1.00 | .00 | 5000 | 0 | 0 | 1.000<br>0 | .0000 | 5000 | 0 | 0 | 5000 | 0 | 0 | 0 | 1.54 |
| 5000 | .85 | 1.00 | .00 | 5000 | 0 | 0 | 1.000<br>0 | .0000 | 5000 | 0 | 0 | 5000 | 0 | 0 | 0 | 1.54 |
| 5000 | .86 | 1.00 | .00 | 5000 | 0 | 0 | 1.000<br>0 | .0000 | 5000 | 0 | 0 | 5000 | 0 | 0 | 0 | 1.54 |
| 5000 | .87 | 1.00 | .00 | 5000 | 0 | 0 | 1.000<br>0 | .0000 | 5000 | 0 | 0 | 5000 | 0 | 0 | 0 | 1.54 |
| 5000 | .88 | 1.00 | .00 | 5000 | 0 | 0 | 1.000<br>0 | .0000 | 5000 | 0 | 0 | 5000 | 0 | 0 | 0 | 1.54 |
| 5000 | .89 | 1.00 | .00 | 5000 | 0 | 0 | 1.000<br>0 | .0000 | 5000 | 0 | 0 | 5000 | 0 | 0 | 0 | 1.54 |
| 5000 | .90 | 1.00 | .00 | 5000 | 0 | 0 | 1.000<br>0 | .0000 | 5000 | 0 | 0 | 5000 | 0 | 0 | 0 | 1.54 |
| 5000 | .91 | 1.00 | .00 | 5000 | 0 | 0 | 1.000<br>0 | .0000 | 5000 | 0 | 0 | 5000 | 0 | 0 | 0 | 1.54 |
| 5000 | .92 | 1.00 | .00 | 5000 | 0 | 0 | 1.000<br>0 | .0000 | 5000 | 0 | 0 | 5000 | 0 | 0 | 0 | 1.54 |
| 5000 | .93 | 1.00 | .00 | 5000 | 0 | 0 | 1.000<br>0 | .0000 | 5000 | 0 | 0 | 5000 | 0 | 0 | 0 | 1.54 |
| 5000 | .94 | 1.00 | .00 | 5000 | 0 | 0 | 1.000<br>0 | .0000 | 5000 | 0 | 0 | 5000 | 0 | 0 | 0 | 1.54 |
| 5000 | .95 | 1.00 | .00 | 5000 | 0 | 0 | 1.000<br>0 | .0000 | 5000 | 0 | 0 | 5000 | 0 | 0 | 0 | 1.54 |
| 5000 | .96 | 1.00 | .00 | 5000 | 0 | 0 | 1.000<br>0 | .0000 | 5000 | 0 | 0 | 5000 | 0 | 0 | 0 | 1.54 |
| 5000 | .97 | 1.00 | .00 | 5000 | 0 | 0 | 1.000<br>0 | .0000 | 5000 | 0 | 0 | 5000 | 0 | 0 | 0 | 1.54 |
| 5000 | .98 | 1.00 | .00 | 5000 | 0 | 0 | 1.000<br>0 | .0000 | 5000 | 0 | 0 | 5000 | 0 | 0 | 0 | 1.54 |
| 5000 | .99 | 1.00 | .00 | 5000 | 0 | 0 | 1.000<br>0 | .0000 | 5000 | 0 | 0 | 5000 | 0 | 0 | 0 | 1.54 |

|      |      |      |     |      |   |   |            |       |      |   |   |      |   |   |   |      |
|------|------|------|-----|------|---|---|------------|-------|------|---|---|------|---|---|---|------|
| 5000 | 1.00 | 1.00 | .00 | 5000 | 0 | 0 | 1.000<br>0 | .0000 | 5000 | 0 | 0 | 5000 | 0 | 0 | 0 | 1.54 |
| 5000 | 1.01 | 1.00 | .00 | 5000 | 0 | 0 | 1.000<br>0 | .0000 | 5000 | 0 | 0 | 5000 | 0 | 0 | 0 | 1.54 |
| 5000 | 1.02 | 1.00 | .00 | 5000 | 0 | 0 | 1.000<br>0 | .0000 | 5000 | 0 | 0 | 5000 | 0 | 0 | 0 | 1.54 |
| 5000 | 1.03 | 1.00 | .00 | 5000 | 0 | 0 | 1.000<br>0 | .0000 | 5000 | 0 | 0 | 5000 | 0 | 0 | 0 | 1.54 |
| 5000 | 1.04 | 1.00 | .00 | 5000 | 0 | 0 | 1.000<br>0 | .0000 | 5000 | 0 | 0 | 5000 | 0 | 0 | 0 | 1.54 |
| 5000 | 1.05 | 1.00 | .00 | 5000 | 0 | 0 | 1.000<br>0 | .0000 | 5000 | 0 | 0 | 5000 | 0 | 0 | 0 | 1.54 |
| 5000 | 1.06 | 1.00 | .00 | 5000 | 0 | 0 | 1.000<br>0 | .0000 | 5000 | 0 | 0 | 5000 | 0 | 0 | 0 | 1.54 |
| 5000 | 1.07 | 1.00 | .00 | 5000 | 0 | 0 | 1.000<br>0 | .0000 | 5000 | 0 | 0 | 5000 | 0 | 0 | 0 | 1.54 |
| 5000 | 1.08 | 1.00 | .00 | 5000 | 0 | 0 | 1.000<br>0 | .0000 | 5000 | 0 | 0 | 5000 | 0 | 0 | 0 | 1.54 |
| 5000 | 1.09 | 1.00 | .00 | 5000 | 0 | 0 | 1.000<br>0 | .0000 | 5000 | 0 | 0 | 5000 | 0 | 0 | 0 | 1.54 |
| 5000 | 1.10 | 1.00 | .00 | 5000 | 0 | 0 | 1.000<br>0 | .0000 | 5000 | 0 | 0 | 5000 | 0 | 0 | 0 | 1.54 |
| 5000 | 1.11 | 1.00 | .00 | 5000 | 0 | 0 | 1.000<br>0 | .0000 | 5000 | 0 | 0 | 5000 | 0 | 0 | 0 | 1.54 |
| 5000 | 1.12 | 1.00 | .00 | 5000 | 0 | 0 | 1.000<br>0 | .0000 | 5000 | 0 | 0 | 5000 | 0 | 0 | 0 | 1.54 |
| 5000 | 1.13 | 1.00 | .00 | 5000 | 0 | 0 | 1.000<br>0 | .0000 | 5000 | 0 | 0 | 5000 | 0 | 0 | 0 | 1.54 |
| 5000 | 1.14 | 1.00 | .00 | 5000 | 0 | 0 | 1.000<br>0 | .0000 | 5000 | 0 | 0 | 5000 | 0 | 0 | 0 | 1.54 |
| 5000 | 1.15 | 1.00 | .00 | 5000 | 0 | 0 | 1.000<br>0 | .0000 | 5000 | 0 | 0 | 5000 | 0 | 0 | 0 | 1.54 |
| 5000 | 1.16 | 1.00 | .00 | 5000 | 0 | 0 | 1.000<br>0 | .0000 | 5000 | 0 | 0 | 5000 | 0 | 0 | 0 | 1.54 |

|       |      |      |     |      |     |      |            |       |      |     |      |      |     |      |     |      |
|-------|------|------|-----|------|-----|------|------------|-------|------|-----|------|------|-----|------|-----|------|
| 5000  | 1.17 | 1.00 | .00 | 5000 | 0   | 0    | 1.000<br>0 | .0000 | 5000 | 0   | 0    | 5000 | 0   | 0    | 0   | 1.54 |
| 5000  | 1.18 | 1.00 | .00 | 5000 | 0   | 0    | 1.000<br>0 | .0000 | 5000 | 0   | 0    | 5000 | 0   | 0    | 0   | 1.54 |
| 5000  | 1.19 | 1.00 | .00 | 5000 | 0   | 0    | 1.000<br>0 | .0000 | 5000 | 0   | 0    | 5000 | 0   | 0    | 0   | 1.54 |
| 5000  | 1.20 | 1.00 | .00 | 5000 | 0   | 0    | 1.000<br>0 | .0000 | 5000 | 0   | 0    | 5000 | 0   | 0    | 0   | 1.54 |
| 10000 | .80  | .05  | .95 | 25   | 950 | 9025 | .0413      | .9587 | 17   | 777 | 9017 | 25   | 760 | 9025 | 190 | 4.46 |
| 10000 | .81  | .05  | .95 | 25   | 950 | 9025 | .0417      | .9583 | 17   | 785 | 9017 | 25   | 770 | 9025 | 181 | 3.98 |
| 10000 | .82  | .05  | .95 | 25   | 950 | 9025 | .0422      | .9578 | 17   | 794 | 9017 | 25   | 779 | 9025 | 171 | 3.53 |
| 10000 | .83  | .05  | .95 | 25   | 950 | 9025 | .0426      | .9574 | 18   | 803 | 9018 | 25   | 789 | 9025 | 162 | 3.11 |
| 10000 | .84  | .05  | .95 | 25   | 950 | 9025 | .0431      | .9569 | 18   | 811 | 9018 | 25   | 798 | 9025 | 152 | 2.72 |
| 10000 | .85  | .05  | .95 | 25   | 950 | 9025 | .0435      | .9565 | 19   | 820 | 9019 | 25   | 808 | 9025 | 143 | 2.36 |
| 10000 | .86  | .05  | .95 | 25   | 950 | 9025 | .0439      | .9561 | 19   | 829 | 9019 | 25   | 817 | 9025 | 133 | 2.04 |
| 10000 | .87  | .05  | .95 | 25   | 950 | 9025 | .0444      | .9556 | 19   | 838 | 9019 | 25   | 827 | 9025 | 124 | 1.74 |
| 10000 | .88  | .05  | .95 | 25   | 950 | 9025 | .0448      | .9552 | 20   | 846 | 9020 | 25   | 836 | 9025 | 114 | 1.46 |
| 10000 | .89  | .05  | .95 | 25   | 950 | 9025 | .0452      | .9548 | 20   | 855 | 9020 | 25   | 846 | 9025 | 105 | 1.22 |
| 10000 | .90  | .05  | .95 | 25   | 950 | 9025 | .0457      | .9543 | 21   | 864 | 9021 | 25   | 855 | 9025 | 95  | .99  |
| 10000 | .91  | .05  | .95 | 25   | 950 | 9025 | .0461      | .9539 | 21   | 872 | 9021 | 25   | 865 | 9025 | 86  | .80  |
| 10000 | .92  | .05  | .95 | 25   | 950 | 9025 | .0466      | .9534 | 22   | 881 | 9022 | 25   | 874 | 9025 | 76  | .62  |
| 10000 | .93  | .05  | .95 | 25   | 950 | 9025 | .0470      | .9530 | 22   | 890 | 9022 | 25   | 884 | 9025 | 67  | .47  |
| 10000 | .94  | .05  | .95 | 25   | 950 | 9025 | .0474      | .9526 | 22   | 898 | 9022 | 25   | 893 | 9025 | 57  | .34  |
| 10000 | .95  | .05  | .95 | 25   | 950 | 9025 | .0479      | .9521 | 23   | 907 | 9023 | 25   | 903 | 9025 | 48  | .24  |
| 10000 | .96  | .05  | .95 | 25   | 950 | 9025 | .0483      | .9517 | 23   | 916 | 9023 | 25   | 912 | 9025 | 38  | .15  |
| 10000 | .97  | .05  | .95 | 25   | 950 | 9025 | .0487      | .9513 | 24   | 924 | 9024 | 25   | 922 | 9025 | 29  | .08  |
| 10000 | .98  | .05  | .95 | 25   | 950 | 9025 | .0491      | .9509 | 24   | 933 | 9024 | 25   | 931 | 9025 | 19  | .04  |
| 10000 | .99  | .05  | .95 | 25   | 950 | 9025 | .0496      | .9504 | 25   | 941 | 9025 | 25   | 941 | 9025 | 10  | .01  |
| 10000 | 1.00 | .05  | .95 | 25   | 950 | 9025 | .0500      | .9500 | 25   | 950 | 9025 | 25   | 950 | 9025 | 0   | .00  |
| 10000 | 1.01 | .05  | .95 | 25   | 950 | 9025 | .0504      | .9496 | 25   | 959 | 9025 | 25   | 960 | 9025 | -10 | .01  |
| 10000 | 1.02 | .05  | .95 | 25   | 950 | 9025 | .0509      | .9491 | 26   | 967 | 9026 | 25   | 969 | 9025 | -19 | .04  |
| 10000 | 1.03 | .05  | .95 | 25   | 950 | 9025 | .0513      | .9487 | 26   | 976 | 9026 | 25   | 979 | 9025 | -29 | .08  |
| 10000 | 1.04 | .05  | .95 | 25   | 950 | 9025 | .0517      | .9483 | 27   | 984 | 9027 | 25   | 988 | 9025 | -38 | .14  |

|       |      |     |     |     |      |      |       |       |    |      |      |     |      |      |      |       |
|-------|------|-----|-----|-----|------|------|-------|-------|----|------|------|-----|------|------|------|-------|
| 10000 | 1.05 | .05 | .95 | 25  | 950  | 9025 | .0521 | .9479 | 27 | 993  | 9027 | 25  | 998  | 9025 | -48  | .22   |
| 10000 | 1.06 | .05 | .95 | 25  | 950  | 9025 | .0526 | .9474 | 28 | 1001 | 9028 | 25  | 1007 | 9025 | -57  | .31   |
| 10000 | 1.07 | .05 | .95 | 25  | 950  | 9025 | .0530 | .9470 | 28 | 1010 | 9028 | 25  | 1017 | 9025 | -67  | .42   |
| 10000 | 1.08 | .05 | .95 | 25  | 950  | 9025 | .0534 | .9466 | 29 | 1019 | 9029 | 25  | 1026 | 9025 | -76  | .54   |
| 10000 | 1.09 | .05 | .95 | 25  | 950  | 9025 | .0538 | .9462 | 29 | 1027 | 9029 | 25  | 1036 | 9025 | -86  | .68   |
| 10000 | 1.10 | .05 | .95 | 25  | 950  | 9025 | .0542 | .9458 | 30 | 1036 | 9030 | 25  | 1045 | 9025 | -95  | .83   |
| 10000 | 1.11 | .05 | .95 | 25  | 950  | 9025 | .0547 | .9453 | 30 | 1044 | 9030 | 25  | 1055 | 9025 | -105 | 1.00  |
| 10000 | 1.12 | .05 | .95 | 25  | 950  | 9025 | .0551 | .9449 | 31 | 1053 | 9031 | 25  | 1064 | 9025 | -114 | 1.18  |
| 10000 | 1.13 | .05 | .95 | 25  | 950  | 9025 | .0555 | .9445 | 31 | 1061 | 9031 | 25  | 1074 | 9025 | -124 | 1.37  |
| 10000 | 1.14 | .05 | .95 | 25  | 950  | 9025 | .0559 | .9441 | 32 | 1070 | 9032 | 25  | 1083 | 9025 | -133 | 1.58  |
| 10000 | 1.15 | .05 | .95 | 25  | 950  | 9025 | .0563 | .9437 | 32 | 1078 | 9032 | 25  | 1093 | 9025 | -143 | 1.80  |
| 10000 | 1.16 | .05 | .95 | 25  | 950  | 9025 | .0567 | .9433 | 33 | 1087 | 9033 | 25  | 1102 | 9025 | -152 | 2.03  |
| 10000 | 1.17 | .05 | .95 | 25  | 950  | 9025 | .0572 | .9428 | 33 | 1095 | 9033 | 25  | 1112 | 9025 | -162 | 2.27  |
| 10000 | 1.18 | .05 | .95 | 25  | 950  | 9025 | .0576 | .9424 | 34 | 1104 | 9034 | 25  | 1121 | 9025 | -171 | 2.53  |
| 10000 | 1.19 | .05 | .95 | 25  | 950  | 9025 | .0580 | .9420 | 34 | 1112 | 9034 | 25  | 1131 | 9025 | -181 | 2.80  |
| 10000 | 1.20 | .05 | .95 | 25  | 950  | 9025 | .0584 | .9416 | 35 | 1121 | 9035 | 25  | 1140 | 9025 | -190 | 3.08  |
| 10000 | .80  | .10 | .90 | 100 | 1800 | 8100 | .0851 | .9149 | 70 | 1500 | 8070 | 100 | 1440 | 8100 | 360  | 15.67 |
| 10000 | .81  | .10 | .90 | 100 | 1800 | 8100 | .0858 | .9142 | 71 | 1516 | 8071 | 100 | 1458 | 8100 | 342  | 13.99 |
| 10000 | .82  | .10 | .90 | 100 | 1800 | 8100 | .0866 | .9134 | 73 | 1531 | 8073 | 100 | 1476 | 8100 | 324  | 12.42 |
| 10000 | .83  | .10 | .90 | 100 | 1800 | 8100 | .0874 | .9126 | 74 | 1546 | 8074 | 100 | 1494 | 8100 | 306  | 10.96 |
| 10000 | .84  | .10 | .90 | 100 | 1800 | 8100 | .0881 | .9119 | 75 | 1561 | 8075 | 100 | 1512 | 8100 | 288  | 9.61  |
| 10000 | .85  | .10 | .90 | 100 | 1800 | 8100 | .0889 | .9111 | 77 | 1576 | 8077 | 100 | 1530 | 8100 | 270  | 8.36  |
| 10000 | .86  | .10 | .90 | 100 | 1800 | 8100 | .0897 | .9103 | 78 | 1591 | 8078 | 100 | 1548 | 8100 | 252  | 7.21  |
| 10000 | .87  | .10 | .90 | 100 | 1800 | 8100 | .0904 | .9096 | 80 | 1606 | 8080 | 100 | 1566 | 8100 | 234  | 6.15  |
| 10000 | .88  | .10 | .90 | 100 | 1800 | 8100 | .0912 | .9088 | 81 | 1621 | 8081 | 100 | 1584 | 8100 | 216  | 5.19  |
| 10000 | .89  | .10 | .90 | 100 | 1800 | 8100 | .0919 | .9081 | 83 | 1636 | 8083 | 100 | 1602 | 8100 | 198  | 4.32  |
| 10000 | .90  | .10 | .90 | 100 | 1800 | 8100 | .0927 | .9073 | 84 | 1651 | 8084 | 100 | 1620 | 8100 | 180  | 3.54  |
| 10000 | .91  | .10 | .90 | 100 | 1800 | 8100 | .0934 | .9066 | 86 | 1666 | 8086 | 100 | 1638 | 8100 | 162  | 2.84  |
| 10000 | .92  | .10 | .90 | 100 | 1800 | 8100 | .0942 | .9058 | 87 | 1681 | 8087 | 100 | 1656 | 8100 | 144  | 2.22  |
| 10000 | .93  | .10 | .90 | 100 | 1800 | 8100 | .0949 | .9051 | 89 | 1696 | 8089 | 100 | 1674 | 8100 | 126  | 1.69  |
| 10000 | .94  | .10 | .90 | 100 | 1800 | 8100 | .0956 | .9044 | 90 | 1711 | 8090 | 100 | 1692 | 8100 | 108  | 1.23  |
| 10000 | .95  | .10 | .90 | 100 | 1800 | 8100 | .0964 | .9036 | 92 | 1726 | 8092 | 100 | 1710 | 8100 | 90   | .85   |
| 10000 | .96  | .10 | .90 | 100 | 1800 | 8100 | .0971 | .9029 | 94 | 1741 | 8094 | 100 | 1728 | 8100 | 72   | .54   |

|       |      |     |     |     |      |      |       |       |     |      |      |     |      |      |      |       |
|-------|------|-----|-----|-----|------|------|-------|-------|-----|------|------|-----|------|------|------|-------|
| 10000 | .97  | .10 | .90 | 100 | 1800 | 8100 | .0978 | .9022 | 95  | 1756 | 8095 | 100 | 1746 | 8100 | 54   | .30   |
| 10000 | .98  | .10 | .90 | 100 | 1800 | 8100 | .0986 | .9014 | 97  | 1770 | 8097 | 100 | 1764 | 8100 | 36   | .13   |
| 10000 | .99  | .10 | .90 | 100 | 1800 | 8100 | .0993 | .9007 | 98  | 1785 | 8098 | 100 | 1782 | 8100 | 18   | .03   |
| 10000 | 1.00 | .10 | .90 | 100 | 1800 | 8100 | .1000 | .9000 | 100 | 1800 | 8100 | 100 | 1800 | 8100 | 0    | .00   |
| 10000 | 1.01 | .10 | .90 | 100 | 1800 | 8100 | .1007 | .8993 | 102 | 1815 | 8102 | 100 | 1818 | 8100 | -18  | .03   |
| 10000 | 1.02 | .10 | .90 | 100 | 1800 | 8100 | .1014 | .8986 | 103 | 1829 | 8103 | 100 | 1836 | 8100 | -36  | .13   |
| 10000 | 1.03 | .10 | .90 | 100 | 1800 | 8100 | .1021 | .8979 | 105 | 1844 | 8105 | 100 | 1854 | 8100 | -54  | .28   |
| 10000 | 1.04 | .10 | .90 | 100 | 1800 | 8100 | .1029 | .8971 | 107 | 1859 | 8107 | 100 | 1872 | 8100 | -72  | .50   |
| 10000 | 1.05 | .10 | .90 | 100 | 1800 | 8100 | .1036 | .8964 | 108 | 1874 | 8108 | 100 | 1890 | 8100 | -90  | .78   |
| 10000 | 1.06 | .10 | .90 | 100 | 1800 | 8100 | .1043 | .8957 | 110 | 1888 | 8110 | 100 | 1908 | 8100 | -108 | 1.11  |
| 10000 | 1.07 | .10 | .90 | 100 | 1800 | 8100 | .1050 | .8950 | 112 | 1903 | 8112 | 100 | 1926 | 8100 | -126 | 1.50  |
| 10000 | 1.08 | .10 | .90 | 100 | 1800 | 8100 | .1057 | .8943 | 113 | 1917 | 8113 | 100 | 1944 | 8100 | -144 | 1.95  |
| 10000 | 1.09 | .10 | .90 | 100 | 1800 | 8100 | .1064 | .8936 | 115 | 1932 | 8115 | 100 | 1962 | 8100 | -162 | 2.45  |
| 10000 | 1.10 | .10 | .90 | 100 | 1800 | 8100 | .1071 | .8929 | 117 | 1947 | 8117 | 100 | 1980 | 8100 | -180 | 3.00  |
| 10000 | 1.11 | .10 | .90 | 100 | 1800 | 8100 | .1078 | .8922 | 118 | 1961 | 8118 | 100 | 1998 | 8100 | -198 | 3.60  |
| 10000 | 1.12 | .10 | .90 | 100 | 1800 | 8100 | .1085 | .8915 | 120 | 1976 | 8120 | 100 | 2016 | 8100 | -216 | 4.26  |
| 10000 | 1.13 | .10 | .90 | 100 | 1800 | 8100 | .1091 | .8909 | 122 | 1990 | 8122 | 100 | 2034 | 8100 | -234 | 4.96  |
| 10000 | 1.14 | .10 | .90 | 100 | 1800 | 8100 | .1098 | .8902 | 124 | 2005 | 8124 | 100 | 2052 | 8100 | -252 | 5.72  |
| 10000 | 1.15 | .10 | .90 | 100 | 1800 | 8100 | .1105 | .8895 | 125 | 2019 | 8125 | 100 | 2070 | 8100 | -270 | 6.52  |
| 10000 | 1.16 | .10 | .90 | 100 | 1800 | 8100 | .1112 | .8888 | 127 | 2034 | 8127 | 100 | 2088 | 8100 | -288 | 7.37  |
| 10000 | 1.17 | .10 | .90 | 100 | 1800 | 8100 | .1119 | .8881 | 129 | 2048 | 8129 | 100 | 2106 | 8100 | -306 | 8.26  |
| 10000 | 1.18 | .10 | .90 | 100 | 1800 | 8100 | .1126 | .8874 | 131 | 2062 | 8131 | 100 | 2124 | 8100 | -324 | 9.20  |
| 10000 | 1.19 | .10 | .90 | 100 | 1800 | 8100 | .1132 | .8868 | 133 | 2077 | 8133 | 100 | 2142 | 8100 | -342 | 10.19 |
| 10000 | 1.20 | .10 | .90 | 100 | 1800 | 8100 | .1139 | .8861 | 134 | 2091 | 8134 | 100 | 2160 | 8100 | -360 | 11.21 |
| 10000 | .80  | .15 | .85 | 225 | 2550 | 7225 | .1312 | .8688 | 163 | 2163 | 7163 | 225 | 2040 | 7225 | 510  | 30.85 |
| 10000 | .81  | .15 | .85 | 225 | 2550 | 7225 | .1322 | .8678 | 166 | 2183 | 7166 | 225 | 2066 | 7225 | 485  | 27.57 |
| 10000 | .82  | .15 | .85 | 225 | 2550 | 7225 | .1332 | .8668 | 169 | 2203 | 7169 | 225 | 2091 | 7225 | 459  | 24.51 |
| 10000 | .83  | .15 | .85 | 225 | 2550 | 7225 | .1341 | .8659 | 172 | 2222 | 7172 | 225 | 2117 | 7225 | 434  | 21.66 |
| 10000 | .84  | .15 | .85 | 225 | 2550 | 7225 | .1351 | .8649 | 175 | 2242 | 7175 | 225 | 2142 | 7225 | 408  | 19.01 |
| 10000 | .85  | .15 | .85 | 225 | 2550 | 7225 | .1361 | .8639 | 178 | 2261 | 7178 | 225 | 2168 | 7225 | 383  | 16.55 |
| 10000 | .86  | .15 | .85 | 225 | 2550 | 7225 | .1370 | .8630 | 181 | 2281 | 7181 | 225 | 2193 | 7225 | 357  | 14.29 |
| 10000 | .87  | .15 | .85 | 225 | 2550 | 7225 | .1380 | .8620 | 184 | 2300 | 7184 | 225 | 2219 | 7225 | 332  | 12.21 |
| 10000 | .88  | .15 | .85 | 225 | 2550 | 7225 | .1390 | .8610 | 187 | 2320 | 7187 | 225 | 2244 | 7225 | 306  | 10.31 |

|       |      |     |     |     |      |      |       |       |     |      |      |     |      |      |      |       |
|-------|------|-----|-----|-----|------|------|-------|-------|-----|------|------|-----|------|------|------|-------|
| 10000 | .89  | .15 | .85 | 225 | 2550 | 7225 | .1399 | .8601 | 190 | 2339 | 7190 | 225 | 2270 | 7225 | 281  | 8.59  |
| 10000 | .90  | .15 | .85 | 225 | 2550 | 7225 | .1408 | .8592 | 193 | 2358 | 7193 | 225 | 2295 | 7225 | 255  | 7.04  |
| 10000 | .91  | .15 | .85 | 225 | 2550 | 7225 | .1418 | .8582 | 196 | 2378 | 7196 | 225 | 2321 | 7225 | 230  | 5.65  |
| 10000 | .92  | .15 | .85 | 225 | 2550 | 7225 | .1427 | .8573 | 200 | 2397 | 7200 | 225 | 2346 | 7225 | 204  | 4.43  |
| 10000 | .93  | .15 | .85 | 225 | 2550 | 7225 | .1436 | .8564 | 203 | 2416 | 7203 | 225 | 2372 | 7225 | 179  | 3.36  |
| 10000 | .94  | .15 | .85 | 225 | 2550 | 7225 | .1446 | .8554 | 206 | 2435 | 7206 | 225 | 2397 | 7225 | 153  | 2.45  |
| 10000 | .95  | .15 | .85 | 225 | 2550 | 7225 | .1455 | .8545 | 209 | 2455 | 7209 | 225 | 2423 | 7225 | 128  | 1.69  |
| 10000 | .96  | .15 | .85 | 225 | 2550 | 7225 | .1464 | .8536 | 212 | 2474 | 7212 | 225 | 2448 | 7225 | 102  | 1.07  |
| 10000 | .97  | .15 | .85 | 225 | 2550 | 7225 | .1473 | .8527 | 215 | 2493 | 7215 | 225 | 2474 | 7225 | 77   | .60   |
| 10000 | .98  | .15 | .85 | 225 | 2550 | 7225 | .1482 | .8518 | 219 | 2512 | 7219 | 225 | 2499 | 7225 | 51   | .26   |
| 10000 | .99  | .15 | .85 | 225 | 2550 | 7225 | .1491 | .8509 | 222 | 2531 | 7222 | 225 | 2525 | 7225 | 26   | .07   |
| 10000 | 1.00 | .15 | .85 | 225 | 2550 | 7225 | .1500 | .8500 | 225 | 2550 | 7225 | 225 | 2550 | 7225 | 0    | .00   |
| 10000 | 1.01 | .15 | .85 | 225 | 2550 | 7225 | .1509 | .8491 | 228 | 2569 | 7228 | 225 | 2576 | 7225 | -26  | .06   |
| 10000 | 1.02 | .15 | .85 | 225 | 2550 | 7225 | .1518 | .8482 | 232 | 2588 | 7232 | 225 | 2601 | 7225 | -51  | .26   |
| 10000 | 1.03 | .15 | .85 | 225 | 2550 | 7225 | .1527 | .8473 | 235 | 2607 | 7235 | 225 | 2627 | 7225 | -77  | .57   |
| 10000 | 1.04 | .15 | .85 | 225 | 2550 | 7225 | .1535 | .8465 | 238 | 2626 | 7238 | 225 | 2652 | 7225 | -102 | 1.01  |
| 10000 | 1.05 | .15 | .85 | 225 | 2550 | 7225 | .1544 | .8456 | 241 | 2645 | 7241 | 225 | 2678 | 7225 | -128 | 1.57  |
| 10000 | 1.06 | .15 | .85 | 225 | 2550 | 7225 | .1553 | .8447 | 245 | 2663 | 7245 | 225 | 2703 | 7225 | -153 | 2.24  |
| 10000 | 1.07 | .15 | .85 | 225 | 2550 | 7225 | .1561 | .8439 | 248 | 2682 | 7248 | 225 | 2729 | 7225 | -179 | 3.03  |
| 10000 | 1.08 | .15 | .85 | 225 | 2550 | 7225 | .1570 | .8430 | 252 | 2701 | 7252 | 225 | 2754 | 7225 | -204 | 3.93  |
| 10000 | 1.09 | .15 | .85 | 225 | 2550 | 7225 | .1579 | .8421 | 255 | 2720 | 7255 | 225 | 2780 | 7225 | -230 | 4.94  |
| 10000 | 1.10 | .15 | .85 | 225 | 2550 | 7225 | .1587 | .8413 | 258 | 2738 | 7258 | 225 | 2805 | 7225 | -255 | 6.06  |
| 10000 | 1.11 | .15 | .85 | 225 | 2550 | 7225 | .1595 | .8405 | 262 | 2757 | 7262 | 225 | 2831 | 7225 | -281 | 7.29  |
| 10000 | 1.12 | .15 | .85 | 225 | 2550 | 7225 | .1604 | .8396 | 265 | 2776 | 7265 | 225 | 2856 | 7225 | -306 | 8.62  |
| 10000 | 1.13 | .15 | .85 | 225 | 2550 | 7225 | .1612 | .8388 | 269 | 2794 | 7269 | 225 | 2882 | 7225 | -332 | 10.05 |
| 10000 | 1.14 | .15 | .85 | 225 | 2550 | 7225 | .1621 | .8379 | 272 | 2813 | 7272 | 225 | 2907 | 7225 | -357 | 11.58 |
| 10000 | 1.15 | .15 | .85 | 225 | 2550 | 7225 | .1629 | .8371 | 275 | 2832 | 7275 | 225 | 2933 | 7225 | -383 | 13.21 |
| 10000 | 1.16 | .15 | .85 | 225 | 2550 | 7225 | .1637 | .8363 | 279 | 2850 | 7279 | 225 | 2958 | 7225 | -408 | 14.93 |
| 10000 | 1.17 | .15 | .85 | 225 | 2550 | 7225 | .1645 | .8355 | 282 | 2869 | 7282 | 225 | 2984 | 7225 | -434 | 16.76 |
| 10000 | 1.18 | .15 | .85 | 225 | 2550 | 7225 | .1654 | .8346 | 286 | 2887 | 7286 | 225 | 3009 | 7225 | -459 | 18.67 |
| 10000 | 1.19 | .15 | .85 | 225 | 2550 | 7225 | .1662 | .8338 | 290 | 2905 | 7290 | 225 | 3035 | 7225 | -485 | 20.68 |
| 10000 | 1.20 | .15 | .85 | 225 | 2550 | 7225 | .1670 | .8330 | 293 | 2924 | 7293 | 225 | 3060 | 7225 | -510 | 22.78 |
| 10000 | .80  | .20 | .80 | 400 | 3200 | 6400 | .1795 | .8205 | 302 | 2757 | 6302 | 400 | 2560 | 6400 | 640  | 47.76 |

|       |      |     |     |     |      |      |       |       |     |      |      |     |      |      |      |       |
|-------|------|-----|-----|-----|------|------|-------|-------|-----|------|------|-----|------|------|------|-------|
| 10000 | .81  | .20 | .80 | 400 | 3200 | 6400 | .1806 | .8194 | 306 | 2779 | 6306 | 400 | 2592 | 6400 | 608  | 42.73 |
| 10000 | .82  | .20 | .80 | 400 | 3200 | 6400 | .1817 | .8183 | 311 | 2802 | 6311 | 400 | 2624 | 6400 | 576  | 38.02 |
| 10000 | .83  | .20 | .80 | 400 | 3200 | 6400 | .1827 | .8173 | 316 | 2824 | 6316 | 400 | 2656 | 6400 | 544  | 33.63 |
| 10000 | .84  | .20 | .80 | 400 | 3200 | 6400 | .1838 | .8162 | 321 | 2847 | 6321 | 400 | 2688 | 6400 | 512  | 29.55 |
| 10000 | .85  | .20 | .80 | 400 | 3200 | 6400 | .1849 | .8151 | 325 | 2869 | 6325 | 400 | 2720 | 6400 | 480  | 25.76 |
| 10000 | .86  | .20 | .80 | 400 | 3200 | 6400 | .1859 | .8141 | 330 | 2892 | 6330 | 400 | 2752 | 6400 | 448  | 22.26 |
| 10000 | .87  | .20 | .80 | 400 | 3200 | 6400 | .1870 | .8130 | 335 | 2914 | 6335 | 400 | 2784 | 6400 | 416  | 19.04 |
| 10000 | .88  | .20 | .80 | 400 | 3200 | 6400 | .1880 | .8120 | 340 | 2936 | 6340 | 400 | 2816 | 6400 | 384  | 16.09 |
| 10000 | .89  | .20 | .80 | 400 | 3200 | 6400 | .1891 | .8109 | 345 | 2958 | 6345 | 400 | 2848 | 6400 | 352  | 13.42 |
| 10000 | .90  | .20 | .80 | 400 | 3200 | 6400 | .1901 | .8099 | 350 | 2980 | 6350 | 400 | 2880 | 6400 | 320  | 11.01 |
| 10000 | .91  | .20 | .80 | 400 | 3200 | 6400 | .1911 | .8089 | 355 | 3003 | 6355 | 400 | 2912 | 6400 | 288  | 8.85  |
| 10000 | .92  | .20 | .80 | 400 | 3200 | 6400 | .1921 | .8079 | 360 | 3025 | 6360 | 400 | 2944 | 6400 | 256  | 6.94  |
| 10000 | .93  | .20 | .80 | 400 | 3200 | 6400 | .1931 | .8069 | 365 | 3047 | 6365 | 400 | 2976 | 6400 | 224  | 5.27  |
| 10000 | .94  | .20 | .80 | 400 | 3200 | 6400 | .1941 | .8059 | 370 | 3069 | 6370 | 400 | 3008 | 6400 | 192  | 3.85  |
| 10000 | .95  | .20 | .80 | 400 | 3200 | 6400 | .1951 | .8049 | 375 | 3091 | 6375 | 400 | 3040 | 6400 | 160  | 2.65  |
| 10000 | .96  | .20 | .80 | 400 | 3200 | 6400 | .1961 | .8039 | 380 | 3113 | 6380 | 400 | 3072 | 6400 | 128  | 1.68  |
| 10000 | .97  | .20 | .80 | 400 | 3200 | 6400 | .1971 | .8029 | 385 | 3135 | 6385 | 400 | 3104 | 6400 | 96   | .94   |
| 10000 | .98  | .20 | .80 | 400 | 3200 | 6400 | .1981 | .8019 | 390 | 3156 | 6390 | 400 | 3136 | 6400 | 64   | .42   |
| 10000 | .99  | .20 | .80 | 400 | 3200 | 6400 | .1990 | .8010 | 395 | 3178 | 6395 | 400 | 3168 | 6400 | 32   | .10   |
| 10000 | 1.00 | .20 | .80 | 400 | 3200 | 6400 | .2000 | .8000 | 400 | 3200 | 6400 | 400 | 3200 | 6400 | 0    | .00   |
| 10000 | 1.01 | .20 | .80 | 400 | 3200 | 6400 | .2010 | .7990 | 405 | 3222 | 6405 | 400 | 3232 | 6400 | -32  | .10   |
| 10000 | 1.02 | .20 | .80 | 400 | 3200 | 6400 | .2019 | .7981 | 410 | 3243 | 6410 | 400 | 3264 | 6400 | -64  | .40   |
| 10000 | 1.03 | .20 | .80 | 400 | 3200 | 6400 | .2029 | .7971 | 415 | 3265 | 6415 | 400 | 3296 | 6400 | -96  | .90   |
| 10000 | 1.04 | .20 | .80 | 400 | 3200 | 6400 | .2038 | .7962 | 421 | 3287 | 6421 | 400 | 3328 | 6400 | -128 | 1.60  |
| 10000 | 1.05 | .20 | .80 | 400 | 3200 | 6400 | .2047 | .7953 | 426 | 3308 | 6426 | 400 | 3360 | 6400 | -160 | 2.48  |
| 10000 | 1.06 | .20 | .80 | 400 | 3200 | 6400 | .2057 | .7943 | 431 | 3330 | 6431 | 400 | 3392 | 6400 | -192 | 3.54  |
| 10000 | 1.07 | .20 | .80 | 400 | 3200 | 6400 | .2066 | .7934 | 436 | 3351 | 6436 | 400 | 3424 | 6400 | -224 | 4.79  |
| 10000 | 1.08 | .20 | .80 | 400 | 3200 | 6400 | .2075 | .7925 | 442 | 3373 | 6442 | 400 | 3456 | 6400 | -256 | 6.22  |
| 10000 | 1.09 | .20 | .80 | 400 | 3200 | 6400 | .2084 | .7916 | 447 | 3394 | 6447 | 400 | 3488 | 6400 | -288 | 7.82  |
| 10000 | 1.10 | .20 | .80 | 400 | 3200 | 6400 | .2093 | .7907 | 452 | 3416 | 6452 | 400 | 3520 | 6400 | -320 | 9.60  |
| 10000 | 1.11 | .20 | .80 | 400 | 3200 | 6400 | .2102 | .7898 | 457 | 3437 | 6457 | 400 | 3552 | 6400 | -352 | 11.55 |
| 10000 | 1.12 | .20 | .80 | 400 | 3200 | 6400 | .2111 | .7889 | 463 | 3459 | 6463 | 400 | 3584 | 6400 | -384 | 13.66 |
| 10000 | 1.13 | .20 | .80 | 400 | 3200 | 6400 | .2120 | .7880 | 468 | 3480 | 6468 | 400 | 3616 | 6400 | -416 | 15.94 |

|       |      |     |     |     |      |      |       |       |     |      |      |     |      |      |      |       |
|-------|------|-----|-----|-----|------|------|-------|-------|-----|------|------|-----|------|------|------|-------|
| 10000 | 1.14 | .20 | .80 | 400 | 3200 | 6400 | .2129 | .7871 | 473 | 3501 | 6473 | 400 | 3648 | 6400 | -448 | 18.37 |
| 10000 | 1.15 | .20 | .80 | 400 | 3200 | 6400 | .2137 | .7863 | 479 | 3522 | 6479 | 400 | 3680 | 6400 | -480 | 20.97 |
| 10000 | 1.16 | .20 | .80 | 400 | 3200 | 6400 | .2146 | .7854 | 484 | 3544 | 6484 | 400 | 3712 | 6400 | -512 | 23.72 |
| 10000 | 1.17 | .20 | .80 | 400 | 3200 | 6400 | .2155 | .7845 | 490 | 3565 | 6490 | 400 | 3744 | 6400 | -544 | 26.62 |
| 10000 | 1.18 | .20 | .80 | 400 | 3200 | 6400 | .2163 | .7837 | 495 | 3586 | 6495 | 400 | 3776 | 6400 | -576 | 29.68 |
| 10000 | 1.19 | .20 | .80 | 400 | 3200 | 6400 | .2172 | .7828 | 500 | 3607 | 6500 | 400 | 3808 | 6400 | -608 | 32.88 |
| 10000 | 1.20 | .20 | .80 | 400 | 3200 | 6400 | .2180 | .7820 | 506 | 3628 | 6506 | 400 | 3840 | 6400 | -640 | 36.23 |
| 10000 | .80  | .25 | .75 | 625 | 3750 | 5625 | .2297 | .7703 | 488 | 3274 | 5488 | 625 | 3000 | 5625 | 750  | 64.63 |
| 10000 | .81  | .25 | .75 | 625 | 3750 | 5625 | .2308 | .7692 | 495 | 3298 | 5495 | 625 | 3038 | 5625 | 713  | 57.89 |
| 10000 | .82  | .25 | .75 | 625 | 3750 | 5625 | .2319 | .7681 | 501 | 3322 | 5501 | 625 | 3075 | 5625 | 675  | 51.56 |
| 10000 | .83  | .25 | .75 | 625 | 3750 | 5625 | .2330 | .7670 | 508 | 3346 | 5508 | 625 | 3113 | 5625 | 638  | 45.64 |
| 10000 | .84  | .25 | .75 | 625 | 3750 | 5625 | .2340 | .7660 | 515 | 3370 | 5515 | 625 | 3150 | 5625 | 600  | 40.13 |
| 10000 | .85  | .25 | .75 | 625 | 3750 | 5625 | .2351 | .7649 | 522 | 3394 | 5522 | 625 | 3188 | 5625 | 563  | 35.01 |
| 10000 | .86  | .25 | .75 | 625 | 3750 | 5625 | .2361 | .7639 | 528 | 3418 | 5528 | 625 | 3225 | 5625 | 525  | 30.28 |
| 10000 | .87  | .25 | .75 | 625 | 3750 | 5625 | .2372 | .7628 | 535 | 3442 | 5535 | 625 | 3263 | 5625 | 488  | 25.92 |
| 10000 | .88  | .25 | .75 | 625 | 3750 | 5625 | .2382 | .7618 | 542 | 3466 | 5542 | 625 | 3300 | 5625 | 450  | 21.93 |
| 10000 | .89  | .25 | .75 | 625 | 3750 | 5625 | .2392 | .7608 | 549 | 3490 | 5549 | 625 | 3338 | 5625 | 413  | 18.30 |
| 10000 | .90  | .25 | .75 | 625 | 3750 | 5625 | .2403 | .7597 | 556 | 3514 | 5556 | 625 | 3375 | 5625 | 375  | 15.02 |
| 10000 | .91  | .25 | .75 | 625 | 3750 | 5625 | .2413 | .7587 | 562 | 3538 | 5562 | 625 | 3413 | 5625 | 338  | 12.08 |
| 10000 | .92  | .25 | .75 | 625 | 3750 | 5625 | .2423 | .7577 | 569 | 3561 | 5569 | 625 | 3450 | 5625 | 300  | 9.48  |
| 10000 | .93  | .25 | .75 | 625 | 3750 | 5625 | .2433 | .7567 | 576 | 3585 | 5576 | 625 | 3488 | 5625 | 263  | 7.21  |
| 10000 | .94  | .25 | .75 | 625 | 3750 | 5625 | .2442 | .7558 | 583 | 3609 | 5583 | 625 | 3525 | 5625 | 225  | 5.26  |
| 10000 | .95  | .25 | .75 | 625 | 3750 | 5625 | .2452 | .7548 | 590 | 3632 | 5590 | 625 | 3563 | 5625 | 188  | 3.63  |
| 10000 | .96  | .25 | .75 | 625 | 3750 | 5625 | .2462 | .7538 | 597 | 3656 | 5597 | 625 | 3600 | 5625 | 150  | 2.31  |
| 10000 | .97  | .25 | .75 | 625 | 3750 | 5625 | .2472 | .7528 | 604 | 3680 | 5604 | 625 | 3638 | 5625 | 113  | 1.29  |
| 10000 | .98  | .25 | .75 | 625 | 3750 | 5625 | .2481 | .7519 | 611 | 3703 | 5611 | 625 | 3675 | 5625 | 75   | .57   |
| 10000 | .99  | .25 | .75 | 625 | 3750 | 5625 | .2491 | .7509 | 618 | 3727 | 5618 | 625 | 3713 | 5625 | 38   | .14   |
| 10000 | 1.00 | .25 | .75 | 625 | 3750 | 5625 | .2500 | .7500 | 625 | 3750 | 5625 | 625 | 3750 | 5625 | 0    | .00   |
| 10000 | 1.01 | .25 | .75 | 625 | 3750 | 5625 | .2509 | .7491 | 632 | 3773 | 5632 | 625 | 3788 | 5625 | -38  | .14   |
| 10000 | 1.02 | .25 | .75 | 625 | 3750 | 5625 | .2519 | .7481 | 639 | 3797 | 5639 | 625 | 3825 | 5625 | -75  | .56   |
| 10000 | 1.03 | .25 | .75 | 625 | 3750 | 5625 | .2528 | .7472 | 646 | 3820 | 5646 | 625 | 3863 | 5625 | -113 | 1.24  |
| 10000 | 1.04 | .25 | .75 | 625 | 3750 | 5625 | .2537 | .7463 | 653 | 3843 | 5653 | 625 | 3900 | 5625 | -150 | 2.20  |
| 10000 | 1.05 | .25 | .75 | 625 | 3750 | 5625 | .2546 | .7454 | 660 | 3867 | 5660 | 625 | 3938 | 5625 | -188 | 3.41  |



|       |      |     |     |     |      |      |       |       |     |      |      |     |      |      |      |       |
|-------|------|-----|-----|-----|------|------|-------|-------|-----|------|------|-----|------|------|------|-------|
| 10000 | 1.06 | .25 | .75 | 625 | 3750 | 5625 | .2555 | .7445 | 667 | 3890 | 5667 | 625 | 3975 | 5625 | -225 | 4.88  |
| 10000 | 1.07 | .25 | .75 | 625 | 3750 | 5625 | .2564 | .7436 | 675 | 3913 | 5675 | 625 | 4013 | 5625 | -263 | 6.61  |
| 10000 | 1.08 | .25 | .75 | 625 | 3750 | 5625 | .2573 | .7427 | 682 | 3936 | 5682 | 625 | 4050 | 5625 | -300 | 8.58  |
| 10000 | 1.09 | .25 | .75 | 625 | 3750 | 5625 | .2582 | .7418 | 689 | 3960 | 5689 | 625 | 4088 | 5625 | -338 | 10.79 |
| 10000 | 1.10 | .25 | .75 | 625 | 3750 | 5625 | .2590 | .7410 | 696 | 3983 | 5696 | 625 | 4125 | 5625 | -375 | 13.25 |
| 10000 | 1.11 | .25 | .75 | 625 | 3750 | 5625 | .2599 | .7401 | 703 | 4006 | 5703 | 625 | 4163 | 5625 | -413 | 15.94 |
| 10000 | 1.12 | .25 | .75 | 625 | 3750 | 5625 | .2608 | .7392 | 711 | 4029 | 5711 | 625 | 4200 | 5625 | -450 | 18.86 |
| 10000 | 1.13 | .25 | .75 | 625 | 3750 | 5625 | .2616 | .7384 | 718 | 4052 | 5718 | 625 | 4238 | 5625 | -488 | 22.02 |
| 10000 | 1.14 | .25 | .75 | 625 | 3750 | 5625 | .2625 | .7375 | 725 | 4075 | 5725 | 625 | 4275 | 5625 | -525 | 25.39 |
| 10000 | 1.15 | .25 | .75 | 625 | 3750 | 5625 | .2633 | .7367 | 732 | 4098 | 5732 | 625 | 4313 | 5625 | -563 | 28.99 |
| 10000 | 1.16 | .25 | .75 | 625 | 3750 | 5625 | .2642 | .7358 | 740 | 4121 | 5740 | 625 | 4350 | 5625 | -600 | 32.81 |
| 10000 | 1.17 | .25 | .75 | 625 | 3750 | 5625 | .2650 | .7350 | 747 | 4144 | 5747 | 625 | 4388 | 5625 | -638 | 36.84 |
| 10000 | 1.18 | .25 | .75 | 625 | 3750 | 5625 | .2658 | .7342 | 754 | 4167 | 5754 | 625 | 4425 | 5625 | -675 | 41.08 |
| 10000 | 1.19 | .25 | .75 | 625 | 3750 | 5625 | .2666 | .7334 | 762 | 4189 | 5762 | 625 | 4463 | 5625 | -713 | 45.53 |
| 10000 | 1.20 | .25 | .75 | 625 | 3750 | 5625 | .2674 | .7326 | 769 | 4212 | 5769 | 625 | 4500 | 5625 | -750 | 50.18 |
| 10000 | .80  | .30 | .70 | 900 | 4200 | 4900 | .2817 | .7183 | 727 | 3707 | 4727 | 900 | 3360 | 4900 | 840  | 80.11 |
| 10000 | .81  | .30 | .70 | 900 | 4200 | 4900 | .2827 | .7173 | 735 | 3732 | 4735 | 900 | 3402 | 4900 | 798  | 71.80 |
| 10000 | .82  | .30 | .70 | 900 | 4200 | 4900 | .2836 | .7164 | 744 | 3757 | 4744 | 900 | 3444 | 4900 | 756  | 64.00 |
| 10000 | .83  | .30 | .70 | 900 | 4200 | 4900 | .2846 | .7154 | 752 | 3781 | 4752 | 900 | 3486 | 4900 | 714  | 56.70 |
| 10000 | .84  | .30 | .70 | 900 | 4200 | 4900 | .2856 | .7144 | 761 | 3806 | 4761 | 900 | 3528 | 4900 | 672  | 49.89 |
| 10000 | .85  | .30 | .70 | 900 | 4200 | 4900 | .2866 | .7134 | 769 | 3831 | 4769 | 900 | 3570 | 4900 | 630  | 43.56 |
| 10000 | .86  | .30 | .70 | 900 | 4200 | 4900 | .2875 | .7125 | 778 | 3856 | 4778 | 900 | 3612 | 4900 | 588  | 37.69 |
| 10000 | .87  | .30 | .70 | 900 | 4200 | 4900 | .2884 | .7116 | 787 | 3881 | 4787 | 900 | 3654 | 4900 | 546  | 32.29 |
| 10000 | .88  | .30 | .70 | 900 | 4200 | 4900 | .2894 | .7106 | 795 | 3906 | 4795 | 900 | 3696 | 4900 | 504  | 27.33 |
| 10000 | .89  | .30 | .70 | 900 | 4200 | 4900 | .2903 | .7097 | 804 | 3930 | 4804 | 900 | 3738 | 4900 | 462  | 22.82 |
| 10000 | .90  | .30 | .70 | 900 | 4200 | 4900 | .2912 | .7088 | 813 | 3955 | 4813 | 900 | 3780 | 4900 | 420  | 18.74 |
| 10000 | .91  | .30 | .70 | 900 | 4200 | 4900 | .2921 | .7079 | 821 | 3980 | 4821 | 900 | 3822 | 4900 | 378  | 15.09 |
| 10000 | .92  | .30 | .70 | 900 | 4200 | 4900 | .2930 | .7070 | 830 | 4004 | 4830 | 900 | 3864 | 4900 | 336  | 11.84 |
| 10000 | .93  | .30 | .70 | 900 | 4200 | 4900 | .2939 | .7061 | 839 | 4029 | 4839 | 900 | 3906 | 4900 | 294  | 9.01  |
| 10000 | .94  | .30 | .70 | 900 | 4200 | 4900 | .2948 | .7052 | 847 | 4053 | 4847 | 900 | 3948 | 4900 | 252  | 6.58  |
| 10000 | .95  | .30 | .70 | 900 | 4200 | 4900 | .2957 | .7043 | 856 | 4078 | 4856 | 900 | 3990 | 4900 | 210  | 4.54  |
| 10000 | .96  | .30 | .70 | 900 | 4200 | 4900 | .2966 | .7034 | 865 | 4102 | 4865 | 900 | 4032 | 4900 | 168  | 2.89  |
| 10000 | .97  | .30 | .70 | 900 | 4200 | 4900 | .2974 | .7026 | 874 | 4127 | 4874 | 900 | 4074 | 4900 | 126  | 1.62  |

|       |      |     |     |      |      |      |       |       |      |      |      |      |      |      |      |       |
|-------|------|-----|-----|------|------|------|-------|-------|------|------|------|------|------|------|------|-------|
| 10000 | .98  | .30 | .70 | 900  | 4200 | 4900 | .2983 | .7017 | 882  | 4151 | 4882 | 900  | 4116 | 4900 | 84   | .71   |
| 10000 | .99  | .30 | .70 | 900  | 4200 | 4900 | .2992 | .7008 | 891  | 4176 | 4891 | 900  | 4158 | 4900 | 42   | .18   |
| 10000 | 1.00 | .30 | .70 | 900  | 4200 | 4900 | .3000 | .7000 | 900  | 4200 | 4900 | 900  | 4200 | 4900 | 0    | .00   |
| 10000 | 1.01 | .30 | .70 | 900  | 4200 | 4900 | .3008 | .6992 | 909  | 4224 | 4909 | 900  | 4242 | 4900 | -42  | .18   |
| 10000 | 1.02 | .30 | .70 | 900  | 4200 | 4900 | .3017 | .6983 | 918  | 4249 | 4918 | 900  | 4284 | 4900 | -84  | .70   |
| 10000 | 1.03 | .30 | .70 | 900  | 4200 | 4900 | .3025 | .6975 | 927  | 4273 | 4927 | 900  | 4326 | 4900 | -126 | 1.56  |
| 10000 | 1.04 | .30 | .70 | 900  | 4200 | 4900 | .3033 | .6967 | 935  | 4297 | 4935 | 900  | 4368 | 4900 | -168 | 2.76  |
| 10000 | 1.05 | .30 | .70 | 900  | 4200 | 4900 | .3041 | .6959 | 944  | 4321 | 4944 | 900  | 4410 | 4900 | -210 | 4.29  |
| 10000 | 1.06 | .30 | .70 | 900  | 4200 | 4900 | .3049 | .6951 | 953  | 4346 | 4953 | 900  | 4452 | 4900 | -252 | 6.14  |
| 10000 | 1.07 | .30 | .70 | 900  | 4200 | 4900 | .3057 | .6943 | 962  | 4370 | 4962 | 900  | 4494 | 4900 | -294 | 8.31  |
| 10000 | 1.08 | .30 | .70 | 900  | 4200 | 4900 | .3065 | .6935 | 971  | 4394 | 4971 | 900  | 4536 | 4900 | -336 | 10.79 |
| 10000 | 1.09 | .30 | .70 | 900  | 4200 | 4900 | .3073 | .6927 | 980  | 4418 | 4980 | 900  | 4578 | 4900 | -378 | 13.59 |
| 10000 | 1.10 | .30 | .70 | 900  | 4200 | 4900 | .3081 | .6919 | 989  | 4442 | 4989 | 900  | 4620 | 4900 | -420 | 16.68 |
| 10000 | 1.11 | .30 | .70 | 900  | 4200 | 4900 | .3088 | .6912 | 998  | 4466 | 4998 | 900  | 4662 | 4900 | -462 | 20.08 |
| 10000 | 1.12 | .30 | .70 | 900  | 4200 | 4900 | .3096 | .6904 | 1007 | 4490 | 5007 | 900  | 4704 | 4900 | -504 | 23.77 |
| 10000 | 1.13 | .30 | .70 | 900  | 4200 | 4900 | .3104 | .6896 | 1016 | 4514 | 5016 | 900  | 4746 | 4900 | -546 | 27.75 |
| 10000 | 1.14 | .30 | .70 | 900  | 4200 | 4900 | .3111 | .6889 | 1025 | 4538 | 5025 | 900  | 4788 | 4900 | -588 | 32.02 |
| 10000 | 1.15 | .30 | .70 | 900  | 4200 | 4900 | .3119 | .6881 | 1034 | 4562 | 5034 | 900  | 4830 | 4900 | -630 | 36.57 |
| 10000 | 1.16 | .30 | .70 | 900  | 4200 | 4900 | .3126 | .6874 | 1043 | 4586 | 5043 | 900  | 4872 | 4900 | -672 | 41.39 |
| 10000 | 1.17 | .30 | .70 | 900  | 4200 | 4900 | .3133 | .6867 | 1052 | 4610 | 5052 | 900  | 4914 | 4900 | -714 | 46.49 |
| 10000 | 1.18 | .30 | .70 | 900  | 4200 | 4900 | .3141 | .6859 | 1061 | 4634 | 5061 | 900  | 4956 | 4900 | -756 | 51.85 |
| 10000 | 1.19 | .30 | .70 | 900  | 4200 | 4900 | .3148 | .6852 | 1070 | 4658 | 5070 | 900  | 4998 | 4900 | -798 | 57.49 |
| 10000 | 1.20 | .30 | .70 | 900  | 4200 | 4900 | .3155 | .6845 | 1079 | 4682 | 5079 | 900  | 5040 | 4900 | -840 | 63.38 |
| 10000 | .80  | .35 | .65 | 1225 | 4550 | 4225 | .3350 | .6650 | 1020 | 4050 | 4020 | 1225 | 3640 | 4225 | 910  | 93.14 |
| 10000 | .81  | .35 | .65 | 1225 | 4550 | 4225 | .3358 | .6642 | 1030 | 4075 | 4030 | 1225 | 3686 | 4225 | 865  | 83.53 |
| 10000 | .82  | .35 | .65 | 1225 | 4550 | 4225 | .3366 | .6634 | 1040 | 4100 | 4040 | 1225 | 3731 | 4225 | 819  | 74.50 |
| 10000 | .83  | .35 | .65 | 1225 | 4550 | 4225 | .3374 | .6626 | 1050 | 4126 | 4050 | 1225 | 3777 | 4225 | 774  | 66.04 |
| 10000 | .84  | .35 | .65 | 1225 | 4550 | 4225 | .3382 | .6618 | 1061 | 4151 | 4061 | 1225 | 3822 | 4225 | 728  | 58.14 |
| 10000 | .85  | .35 | .65 | 1225 | 4550 | 4225 | .3390 | .6610 | 1071 | 4176 | 4071 | 1225 | 3868 | 4225 | 683  | 50.78 |
| 10000 | .86  | .35 | .65 | 1225 | 4550 | 4225 | .3398 | .6602 | 1081 | 4201 | 4081 | 1225 | 3913 | 4225 | 637  | 43.97 |
| 10000 | .87  | .35 | .65 | 1225 | 4550 | 4225 | .3406 | .6594 | 1091 | 4226 | 4091 | 1225 | 3959 | 4225 | 592  | 37.69 |
| 10000 | .88  | .35 | .65 | 1225 | 4550 | 4225 | .3413 | .6587 | 1101 | 4251 | 4101 | 1225 | 4004 | 4225 | 546  | 31.92 |
| 10000 | .89  | .35 | .65 | 1225 | 4550 | 4225 | .3421 | .6579 | 1112 | 4276 | 4112 | 1225 | 4050 | 4225 | 501  | 26.66 |

|       |      |     |     |      |      |      |       |       |      |      |      |      |      |      |      |        |
|-------|------|-----|-----|------|------|------|-------|-------|------|------|------|------|------|------|------|--------|
| 10000 | .90  | .35 | .65 | 1225 | 4550 | 4225 | .3428 | .6572 | 1122 | 4301 | 4122 | 1225 | 4095 | 4225 | 455  | 21.91  |
| 10000 | .91  | .35 | .65 | 1225 | 4550 | 4225 | .3436 | .6564 | 1132 | 4326 | 4132 | 1225 | 4141 | 4225 | 410  | 17.64  |
| 10000 | .92  | .35 | .65 | 1225 | 4550 | 4225 | .3443 | .6557 | 1142 | 4351 | 4142 | 1225 | 4186 | 4225 | 364  | 13.86  |
| 10000 | .93  | .35 | .65 | 1225 | 4550 | 4225 | .3451 | .6549 | 1153 | 4376 | 4153 | 1225 | 4232 | 4225 | 319  | 10.55  |
| 10000 | .94  | .35 | .65 | 1225 | 4550 | 4225 | .3458 | .6542 | 1163 | 4401 | 4163 | 1225 | 4277 | 4225 | 273  | 7.71   |
| 10000 | .95  | .35 | .65 | 1225 | 4550 | 4225 | .3465 | .6535 | 1173 | 4426 | 4173 | 1225 | 4323 | 4225 | 228  | 5.32   |
| 10000 | .96  | .35 | .65 | 1225 | 4550 | 4225 | .3472 | .6528 | 1184 | 4451 | 4184 | 1225 | 4368 | 4225 | 182  | 3.39   |
| 10000 | .97  | .35 | .65 | 1225 | 4550 | 4225 | .3479 | .6521 | 1194 | 4476 | 4194 | 1225 | 4414 | 4225 | 137  | 1.89   |
| 10000 | .98  | .35 | .65 | 1225 | 4550 | 4225 | .3486 | .6514 | 1204 | 4500 | 4204 | 1225 | 4459 | 4225 | 91   | .84    |
| 10000 | .99  | .35 | .65 | 1225 | 4550 | 4225 | .3493 | .6507 | 1215 | 4525 | 4215 | 1225 | 4505 | 4225 | 46   | .21    |
| 10000 | 1.00 | .35 | .65 | 1225 | 4550 | 4225 | .3500 | .6500 | 1225 | 4550 | 4225 | 1225 | 4550 | 4225 | 0    | .00    |
| 10000 | 1.01 | .35 | .65 | 1225 | 4550 | 4225 | .3507 | .6493 | 1235 | 4575 | 4235 | 1225 | 4596 | 4225 | -46  | .21    |
| 10000 | 1.02 | .35 | .65 | 1225 | 4550 | 4225 | .3514 | .6486 | 1246 | 4600 | 4246 | 1225 | 4641 | 4225 | -91  | .82    |
| 10000 | 1.03 | .35 | .65 | 1225 | 4550 | 4225 | .3520 | .6480 | 1256 | 4624 | 4256 | 1225 | 4687 | 4225 | -137 | 1.83   |
| 10000 | 1.04 | .35 | .65 | 1225 | 4550 | 4225 | .3527 | .6473 | 1266 | 4649 | 4266 | 1225 | 4732 | 4225 | -182 | 3.24   |
| 10000 | 1.05 | .35 | .65 | 1225 | 4550 | 4225 | .3533 | .6467 | 1277 | 4674 | 4277 | 1225 | 4778 | 4225 | -228 | 5.04   |
| 10000 | 1.06 | .35 | .65 | 1225 | 4550 | 4225 | .3540 | .6460 | 1287 | 4698 | 4287 | 1225 | 4823 | 4225 | -273 | 7.22   |
| 10000 | 1.07 | .35 | .65 | 1225 | 4550 | 4225 | .3546 | .6454 | 1298 | 4723 | 4298 | 1225 | 4869 | 4225 | -319 | 9.77   |
| 10000 | 1.08 | .35 | .65 | 1225 | 4550 | 4225 | .3553 | .6447 | 1308 | 4748 | 4308 | 1225 | 4914 | 4225 | -364 | 12.70  |
| 10000 | 1.09 | .35 | .65 | 1225 | 4550 | 4225 | .3559 | .6441 | 1319 | 4772 | 4319 | 1225 | 4960 | 4225 | -410 | 15.99  |
| 10000 | 1.10 | .35 | .65 | 1225 | 4550 | 4225 | .3565 | .6435 | 1329 | 4797 | 4329 | 1225 | 5005 | 4225 | -455 | 19.64  |
| 10000 | 1.11 | .35 | .65 | 1225 | 4550 | 4225 | .3571 | .6429 | 1339 | 4822 | 4339 | 1225 | 5051 | 4225 | -501 | 23.64  |
| 10000 | 1.12 | .35 | .65 | 1225 | 4550 | 4225 | .3578 | .6422 | 1350 | 4846 | 4350 | 1225 | 5096 | 4225 | -546 | 28.00  |
| 10000 | 1.13 | .35 | .65 | 1225 | 4550 | 4225 | .3584 | .6416 | 1360 | 4871 | 4360 | 1225 | 5142 | 4225 | -592 | 32.69  |
| 10000 | 1.14 | .35 | .65 | 1225 | 4550 | 4225 | .3590 | .6410 | 1371 | 4895 | 4371 | 1225 | 5187 | 4225 | -637 | 37.73  |
| 10000 | 1.15 | .35 | .65 | 1225 | 4550 | 4225 | .3596 | .6404 | 1381 | 4920 | 4381 | 1225 | 5233 | 4225 | -683 | 43.10  |
| 10000 | 1.16 | .35 | .65 | 1225 | 4550 | 4225 | .3602 | .6398 | 1392 | 4945 | 4392 | 1225 | 5278 | 4225 | -728 | 48.79  |
| 10000 | 1.17 | .35 | .65 | 1225 | 4550 | 4225 | .3608 | .6392 | 1402 | 4969 | 4402 | 1225 | 5324 | 4225 | -774 | 54.81  |
| 10000 | 1.18 | .35 | .65 | 1225 | 4550 | 4225 | .3614 | .6386 | 1413 | 4994 | 4413 | 1225 | 5369 | 4225 | -819 | 61.16  |
| 10000 | 1.19 | .35 | .65 | 1225 | 4550 | 4225 | .3619 | .6381 | 1423 | 5018 | 4423 | 1225 | 5415 | 4225 | -865 | 67.81  |
| 10000 | 1.20 | .35 | .65 | 1225 | 4550 | 4225 | .3625 | .6375 | 1434 | 5043 | 4434 | 1225 | 5460 | 4225 | -910 | 74.78  |
| 10000 | .80  | .40 | .60 | 1600 | 4800 | 3600 | .3894 | .6106 | 1371 | 4299 | 3371 | 1600 | 3840 | 3600 | 960  | 102.96 |

|       |      |     |     |      |      |      |       |       |      |      |      |      |      |      |      |       |
|-------|------|-----|-----|------|------|------|-------|-------|------|------|------|------|------|------|------|-------|
| 10000 | .81  | .40 | .60 | 1600 | 4800 | 3600 | .3900 | .6100 | 1382 | 4324 | 3382 | 1600 | 3888 | 3600 | 912  | 92.37 |
| 10000 | .82  | .40 | .60 | 1600 | 4800 | 3600 | .3905 | .6095 | 1393 | 4349 | 3393 | 1600 | 3936 | 3600 | 864  | 82.42 |
| 10000 | .83  | .40 | .60 | 1600 | 4800 | 3600 | .3911 | .6089 | 1405 | 4374 | 3405 | 1600 | 3984 | 3600 | 816  | 73.09 |
| 10000 | .84  | .40 | .60 | 1600 | 4800 | 3600 | .3917 | .6083 | 1416 | 4399 | 3416 | 1600 | 4032 | 3600 | 768  | 64.37 |
| 10000 | .85  | .40 | .60 | 1600 | 4800 | 3600 | .3922 | .6078 | 1428 | 4424 | 3428 | 1600 | 4080 | 3600 | 720  | 56.25 |
| 10000 | .86  | .40 | .60 | 1600 | 4800 | 3600 | .3928 | .6072 | 1439 | 4450 | 3439 | 1600 | 4128 | 3600 | 672  | 48.73 |
| 10000 | .87  | .40 | .60 | 1600 | 4800 | 3600 | .3933 | .6067 | 1451 | 4475 | 3451 | 1600 | 4176 | 3600 | 624  | 41.78 |
| 10000 | .88  | .40 | .60 | 1600 | 4800 | 3600 | .3939 | .6061 | 1462 | 4500 | 3462 | 1600 | 4224 | 3600 | 576  | 35.40 |
| 10000 | .89  | .40 | .60 | 1600 | 4800 | 3600 | .3944 | .6056 | 1474 | 4525 | 3474 | 1600 | 4272 | 3600 | 528  | 29.58 |
| 10000 | .90  | .40 | .60 | 1600 | 4800 | 3600 | .3950 | .6050 | 1485 | 4550 | 3485 | 1600 | 4320 | 3600 | 480  | 24.31 |
| 10000 | .91  | .40 | .60 | 1600 | 4800 | 3600 | .3955 | .6045 | 1497 | 4575 | 3497 | 1600 | 4368 | 3600 | 432  | 19.58 |
| 10000 | .92  | .40 | .60 | 1600 | 4800 | 3600 | .3960 | .6040 | 1508 | 4600 | 3508 | 1600 | 4416 | 3600 | 384  | 15.39 |
| 10000 | .93  | .40 | .60 | 1600 | 4800 | 3600 | .3965 | .6035 | 1519 | 4625 | 3519 | 1600 | 4464 | 3600 | 336  | 11.72 |
| 10000 | .94  | .40 | .60 | 1600 | 4800 | 3600 | .3970 | .6030 | 1531 | 4650 | 3531 | 1600 | 4512 | 3600 | 288  | 8.56  |
| 10000 | .95  | .40 | .60 | 1600 | 4800 | 3600 | .3975 | .6025 | 1542 | 4675 | 3542 | 1600 | 4560 | 3600 | 240  | 5.91  |
| 10000 | .96  | .40 | .60 | 1600 | 4800 | 3600 | .3980 | .6020 | 1554 | 4700 | 3554 | 1600 | 4608 | 3600 | 192  | 3.76  |
| 10000 | .97  | .40 | .60 | 1600 | 4800 | 3600 | .3985 | .6015 | 1565 | 4725 | 3565 | 1600 | 4656 | 3600 | 144  | 2.11  |
| 10000 | .98  | .40 | .60 | 1600 | 4800 | 3600 | .3990 | .6010 | 1577 | 4750 | 3577 | 1600 | 4704 | 3600 | 96   | .93   |
| 10000 | .99  | .40 | .60 | 1600 | 4800 | 3600 | .3995 | .6005 | 1588 | 4775 | 3588 | 1600 | 4752 | 3600 | 48   | .23   |
| 10000 | 1.00 | .40 | .60 | 1600 | 4800 | 3600 | .4000 | .6000 | 1600 | 4800 | 3600 | 1600 | 4800 | 3600 | 0    | .00   |
| 10000 | 1.01 | .40 | .60 | 1600 | 4800 | 3600 | .4005 | .5995 | 1612 | 4825 | 3612 | 1600 | 4848 | 3600 | -48  | .23   |
| 10000 | 1.02 | .40 | .60 | 1600 | 4800 | 3600 | .4010 | .5990 | 1623 | 4850 | 3623 | 1600 | 4896 | 3600 | -96  | .91   |
| 10000 | 1.03 | .40 | .60 | 1600 | 4800 | 3600 | .4014 | .5986 | 1635 | 4875 | 3635 | 1600 | 4944 | 3600 | -144 | 2.04  |
| 10000 | 1.04 | .40 | .60 | 1600 | 4800 | 3600 | .4019 | .5981 | 1646 | 4900 | 3646 | 1600 | 4992 | 3600 | -192 | 3.61  |
| 10000 | 1.05 | .40 | .60 | 1600 | 4800 | 3600 | .4023 | .5977 | 1658 | 4925 | 3658 | 1600 | 5040 | 3600 | -240 | 5.61  |
| 10000 | 1.06 | .40 | .60 | 1600 | 4800 | 3600 | .4028 | .5972 | 1669 | 4950 | 3669 | 1600 | 5088 | 3600 | -288 | 8.04  |
| 10000 | 1.07 | .40 | .60 | 1600 | 4800 | 3600 | .4033 | .5967 | 1681 | 4975 | 3681 | 1600 | 5136 | 3600 | -336 | 10.89 |
| 10000 | 1.08 | .40 | .60 | 1600 | 4800 | 3600 | .4037 | .5963 | 1692 | 4999 | 3692 | 1600 | 5184 | 3600 | -384 | 14.16 |
| 10000 | 1.09 | .40 | .60 | 1600 | 4800 | 3600 | .4041 | .5959 | 1704 | 5024 | 3704 | 1600 | 5232 | 3600 | -432 | 17.83 |
| 10000 | 1.10 | .40 | .60 | 1600 | 4800 | 3600 | .4046 | .5954 | 1715 | 5049 | 3715 | 1600 | 5280 | 3600 | -480 | 21.91 |
| 10000 | 1.11 | .40 | .60 | 1600 | 4800 | 3600 | .4050 | .5950 | 1727 | 5074 | 3727 | 1600 | 5328 | 3600 | -528 | 26.38 |
| 10000 | 1.12 | .40 | .60 | 1600 | 4800 | 3600 | .4054 | .5946 | 1739 | 5099 | 3739 | 1600 | 5376 | 3600 | -576 | 31.24 |
| 10000 | 1.13 | .40 | .60 | 1600 | 4800 | 3600 | .4059 | .5941 | 1750 | 5124 | 3750 | 1600 | 5424 | 3600 | -624 | 36.48 |

|       |      |     |     |      |      |      |       |       |      |      |      |      |      |      |      |        |
|-------|------|-----|-----|------|------|------|-------|-------|------|------|------|------|------|------|------|--------|
| 10000 | 1.14 | .40 | .60 | 1600 | 4800 | 3600 | .4063 | .5937 | 1762 | 5149 | 3762 | 1600 | 5472 | 3600 | -672 | 42.11  |
| 10000 | 1.15 | .40 | .60 | 1600 | 4800 | 3600 | .4067 | .5933 | 1773 | 5173 | 3773 | 1600 | 5520 | 3600 | -720 | 48.11  |
| 10000 | 1.16 | .40 | .60 | 1600 | 4800 | 3600 | .4071 | .5929 | 1785 | 5198 | 3785 | 1600 | 5568 | 3600 | -768 | 54.48  |
| 10000 | 1.17 | .40 | .60 | 1600 | 4800 | 3600 | .4075 | .5925 | 1796 | 5223 | 3796 | 1600 | 5616 | 3600 | -816 | 61.21  |
| 10000 | 1.18 | .40 | .60 | 1600 | 4800 | 3600 | .4080 | .5920 | 1808 | 5248 | 3808 | 1600 | 5664 | 3600 | -864 | 68.30  |
| 10000 | 1.19 | .40 | .60 | 1600 | 4800 | 3600 | .4084 | .5916 | 1820 | 5273 | 3820 | 1600 | 5712 | 3600 | -912 | 75.74  |
| 10000 | 1.20 | .40 | .60 | 1600 | 4800 | 3600 | .4088 | .5912 | 1831 | 5298 | 3831 | 1600 | 5760 | 3600 | -960 | 83.53  |
| 10000 | .80  | .45 | .55 | 2025 | 4950 | 3025 | .4445 | .5555 | 1780 | 4450 | 2780 | 2025 | 3960 | 3025 | 990  | 109.05 |
| 10000 | .81  | .45 | .55 | 2025 | 4950 | 3025 | .4448 | .5552 | 1792 | 4475 | 2792 | 2025 | 4010 | 3025 | 941  | 97.86  |
| 10000 | .82  | .45 | .55 | 2025 | 4950 | 3025 | .4451 | .5549 | 1805 | 4500 | 2805 | 2025 | 4059 | 3025 | 891  | 87.34  |
| 10000 | .83  | .45 | .55 | 2025 | 4950 | 3025 | .4454 | .5546 | 1817 | 4525 | 2817 | 2025 | 4109 | 3025 | 842  | 77.48  |
| 10000 | .84  | .45 | .55 | 2025 | 4950 | 3025 | .4457 | .5543 | 1829 | 4550 | 2829 | 2025 | 4158 | 3025 | 792  | 68.25  |
| 10000 | .85  | .45 | .55 | 2025 | 4950 | 3025 | .4460 | .5540 | 1841 | 4575 | 2841 | 2025 | 4208 | 3025 | 743  | 59.66  |
| 10000 | .86  | .45 | .55 | 2025 | 4950 | 3025 | .4463 | .5537 | 1854 | 4600 | 2854 | 2025 | 4257 | 3025 | 693  | 51.68  |
| 10000 | .87  | .45 | .55 | 2025 | 4950 | 3025 | .4466 | .5534 | 1866 | 4625 | 2866 | 2025 | 4307 | 3025 | 644  | 44.32  |
| 10000 | .88  | .45 | .55 | 2025 | 4950 | 3025 | .4468 | .5532 | 1878 | 4650 | 2878 | 2025 | 4356 | 3025 | 594  | 37.56  |
| 10000 | .89  | .45 | .55 | 2025 | 4950 | 3025 | .4471 | .5529 | 1890 | 4675 | 2890 | 2025 | 4406 | 3025 | 545  | 31.39  |
| 10000 | .90  | .45 | .55 | 2025 | 4950 | 3025 | .4474 | .5526 | 1903 | 4700 | 2903 | 2025 | 4455 | 3025 | 495  | 25.81  |
| 10000 | .91  | .45 | .55 | 2025 | 4950 | 3025 | .4477 | .5523 | 1915 | 4725 | 2915 | 2025 | 4505 | 3025 | 446  | 20.79  |
| 10000 | .92  | .45 | .55 | 2025 | 4950 | 3025 | .4479 | .5521 | 1927 | 4750 | 2927 | 2025 | 4554 | 3025 | 396  | 16.34  |
| 10000 | .93  | .45 | .55 | 2025 | 4950 | 3025 | .4482 | .5518 | 1939 | 4775 | 2939 | 2025 | 4604 | 3025 | 347  | 12.45  |
| 10000 | .94  | .45 | .55 | 2025 | 4950 | 3025 | .4485 | .5515 | 1952 | 4800 | 2952 | 2025 | 4653 | 3025 | 297  | 9.10   |
| 10000 | .95  | .45 | .55 | 2025 | 4950 | 3025 | .4487 | .5513 | 1964 | 4825 | 2964 | 2025 | 4703 | 3025 | 248  | 6.28   |
| 10000 | .96  | .45 | .55 | 2025 | 4950 | 3025 | .4490 | .5510 | 1976 | 4850 | 2976 | 2025 | 4752 | 3025 | 198  | 4.00   |
| 10000 | .97  | .45 | .55 | 2025 | 4950 | 3025 | .4492 | .5508 | 1988 | 4875 | 2988 | 2025 | 4802 | 3025 | 149  | 2.24   |
| 10000 | .98  | .45 | .55 | 2025 | 4950 | 3025 | .4495 | .5505 | 2000 | 4900 | 3000 | 2025 | 4851 | 3025 | 99   | .99    |
| 10000 | .99  | .45 | .55 | 2025 | 4950 | 3025 | .4498 | .5502 | 2013 | 4925 | 3013 | 2025 | 4901 | 3025 | 50   | .25    |
| 10000 | 1.00 | .45 | .55 | 2025 | 4950 | 3025 | .4500 | .5500 | 2025 | 4950 | 3025 | 2025 | 4950 | 3025 | 0    | .00    |
| 10000 | 1.01 | .45 | .55 | 2025 | 4950 | 3025 | .4502 | .5498 | 2037 | 4975 | 3037 | 2025 | 5000 | 3025 | -50  | .24    |
| 10000 | 1.02 | .45 | .55 | 2025 | 4950 | 3025 | .4505 | .5495 | 2050 | 5000 | 3050 | 2025 | 5049 | 3025 | -99  | .97    |
| 10000 | 1.03 | .45 | .55 | 2025 | 4950 | 3025 | .4507 | .5493 | 2062 | 5025 | 3062 | 2025 | 5099 | 3025 | -149 | 2.17   |
| 10000 | 1.04 | .45 | .55 | 2025 | 4950 | 3025 | .4510 | .5490 | 2074 | 5050 | 3074 | 2025 | 5148 | 3025 | -198 | 3.84   |

|       |      |     |     |      |      |      |       |       |      |      |      |      |      |      |      |            |
|-------|------|-----|-----|------|------|------|-------|-------|------|------|------|------|------|------|------|------------|
| 10000 | 1.05 | .45 | .55 | 2025 | 4950 | 3025 | .4512 | .5488 | 2086 | 5075 | 3086 | 2025 | 5198 | 3025 | -248 | 5.97       |
| 10000 | 1.06 | .45 | .55 | 2025 | 4950 | 3025 | .4514 | .5486 | 2099 | 5100 | 3099 | 2025 | 5247 | 3025 | -297 | 8.56       |
| 10000 | 1.07 | .45 | .55 | 2025 | 4950 | 3025 | .4517 | .5483 | 2111 | 5125 | 3111 | 2025 | 5297 | 3025 | -347 | 11.60      |
| 10000 | 1.08 | .45 | .55 | 2025 | 4950 | 3025 | .4519 | .5481 | 2123 | 5150 | 3123 | 2025 | 5346 | 3025 | -396 | 15.07      |
| 10000 | 1.09 | .45 | .55 | 2025 | 4950 | 3025 | .4521 | .5479 | 2135 | 5175 | 3135 | 2025 | 5396 | 3025 | -446 | 18.98      |
| 10000 | 1.10 | .45 | .55 | 2025 | 4950 | 3025 | .4524 | .5476 | 2148 | 5200 | 3148 | 2025 | 5445 | 3025 | -495 | 23.33      |
| 10000 | 1.11 | .45 | .55 | 2025 | 4950 | 3025 | .4526 | .5474 | 2160 | 5225 | 3160 | 2025 | 5495 | 3025 | -545 | 28.09      |
| 10000 | 1.12 | .45 | .55 | 2025 | 4950 | 3025 | .4528 | .5472 | 2172 | 5250 | 3172 | 2025 | 5544 | 3025 | -594 | 33.27      |
| 10000 | 1.13 | .45 | .55 | 2025 | 4950 | 3025 | .4530 | .5470 | 2184 | 5275 | 3184 | 2025 | 5594 | 3025 | -644 | 38.86      |
| 10000 | 1.14 | .45 | .55 | 2025 | 4950 | 3025 | .4532 | .5468 | 2197 | 5300 | 3197 | 2025 | 5643 | 3025 | -693 | 44.86      |
| 10000 | 1.15 | .45 | .55 | 2025 | 4950 | 3025 | .4535 | .5465 | 2209 | 5325 | 3209 | 2025 | 5693 | 3025 | -743 | 51.25      |
| 10000 | 1.16 | .45 | .55 | 2025 | 4950 | 3025 | .4537 | .5463 | 2221 | 5350 | 3221 | 2025 | 5742 | 3025 | -792 | 58.04      |
| 10000 | 1.17 | .45 | .55 | 2025 | 4950 | 3025 | .4539 | .5461 | 2233 | 5375 | 3233 | 2025 | 5792 | 3025 | -842 | 65.22      |
| 10000 | 1.18 | .45 | .55 | 2025 | 4950 | 3025 | .4541 | .5459 | 2246 | 5400 | 3246 | 2025 | 5841 | 3025 | -891 | 72.78      |
| 10000 | 1.19 | .45 | .55 | 2025 | 4950 | 3025 | .4543 | .5457 | 2258 | 5425 | 3258 | 2025 | 5891 | 3025 | -941 | 80.72      |
| 10000 | 1.20 | .45 | .55 | 2025 | 4950 | 3025 | .4545 | .5455 | 2270 | 5450 | 3270 | 2025 | 5940 | 3025 | -990 | 89.03      |
| 10000 | .80  | .50 | .50 | 2500 | 5000 | 2500 | .5000 | .5000 | 2250 | 4500 | 2250 | 2500 | 4000 | 2500 | 1000 | 111.1<br>1 |
| 10000 | .81  | .50 | .50 | 2500 | 5000 | 2500 | .5000 | .5000 | 2263 | 4525 | 2263 | 2500 | 4050 | 2500 | 950  | 99.72      |
| 10000 | .82  | .50 | .50 | 2500 | 5000 | 2500 | .5000 | .5000 | 2275 | 4550 | 2275 | 2500 | 4100 | 2500 | 900  | 89.01      |
| 10000 | .83  | .50 | .50 | 2500 | 5000 | 2500 | .5000 | .5000 | 2288 | 4575 | 2288 | 2500 | 4150 | 2500 | 850  | 78.96      |
| 10000 | .84  | .50 | .50 | 2500 | 5000 | 2500 | .5000 | .5000 | 2300 | 4600 | 2300 | 2500 | 4200 | 2500 | 800  | 69.57      |
| 10000 | .85  | .50 | .50 | 2500 | 5000 | 2500 | .5000 | .5000 | 2313 | 4625 | 2313 | 2500 | 4250 | 2500 | 750  | 60.81      |
| 10000 | .86  | .50 | .50 | 2500 | 5000 | 2500 | .5000 | .5000 | 2325 | 4650 | 2325 | 2500 | 4300 | 2500 | 700  | 52.69      |
| 10000 | .87  | .50 | .50 | 2500 | 5000 | 2500 | .5000 | .5000 | 2338 | 4675 | 2338 | 2500 | 4350 | 2500 | 650  | 45.19      |
| 10000 | .88  | .50 | .50 | 2500 | 5000 | 2500 | .5000 | .5000 | 2350 | 4700 | 2350 | 2500 | 4400 | 2500 | 600  | 38.30      |
| 10000 | .89  | .50 | .50 | 2500 | 5000 | 2500 | .5000 | .5000 | 2363 | 4725 | 2363 | 2500 | 4450 | 2500 | 550  | 32.01      |
| 10000 | .90  | .50 | .50 | 2500 | 5000 | 2500 | .5000 | .5000 | 2375 | 4750 | 2375 | 2500 | 4500 | 2500 | 500  | 26.32      |
| 10000 | .91  | .50 | .50 | 2500 | 5000 | 2500 | .5000 | .5000 | 2388 | 4775 | 2388 | 2500 | 4550 | 2500 | 450  | 21.20      |
| 10000 | .92  | .50 | .50 | 2500 | 5000 | 2500 | .5000 | .5000 | 2400 | 4800 | 2400 | 2500 | 4600 | 2500 | 400  | 16.67      |
| 10000 | .93  | .50 | .50 | 2500 | 5000 | 2500 | .5000 | .5000 | 2413 | 4825 | 2413 | 2500 | 4650 | 2500 | 350  | 12.69      |
| 10000 | .94  | .50 | .50 | 2500 | 5000 | 2500 | .5000 | .5000 | 2425 | 4850 | 2425 | 2500 | 4700 | 2500 | 300  | 9.28       |
| 10000 | .95  | .50 | .50 | 2500 | 5000 | 2500 | .5000 | .5000 | 2438 | 4875 | 2438 | 2500 | 4750 | 2500 | 250  | 6.41       |

|       |      |     |     |      |      |      |       |       |      |      |      |      |      |      |       |        |
|-------|------|-----|-----|------|------|------|-------|-------|------|------|------|------|------|------|-------|--------|
| 10000 | .96  | .50 | .50 | 2500 | 5000 | 2500 | .5000 | .5000 | 2450 | 4900 | 2450 | 2500 | 4800 | 2500 | 200   | 4.08   |
| 10000 | .97  | .50 | .50 | 2500 | 5000 | 2500 | .5000 | .5000 | 2463 | 4925 | 2463 | 2500 | 4850 | 2500 | 150   | 2.28   |
| 10000 | .98  | .50 | .50 | 2500 | 5000 | 2500 | .5000 | .5000 | 2475 | 4950 | 2475 | 2500 | 4900 | 2500 | 100   | 1.01   |
| 10000 | .99  | .50 | .50 | 2500 | 5000 | 2500 | .5000 | .5000 | 2488 | 4975 | 2488 | 2500 | 4950 | 2500 | 50    | .25    |
| 10000 | 1.00 | .50 | .50 | 2500 | 5000 | 2500 | .5000 | .5000 | 2500 | 5000 | 2500 | 2500 | 5000 | 2500 | 0     | .00    |
| 10000 | 1.01 | .50 | .50 | 2500 | 5000 | 2500 | .5000 | .5000 | 2513 | 5025 | 2513 | 2500 | 5050 | 2500 | -50   | .25    |
| 10000 | 1.02 | .50 | .50 | 2500 | 5000 | 2500 | .5000 | .5000 | 2525 | 5050 | 2525 | 2500 | 5100 | 2500 | -100  | .99    |
| 10000 | 1.03 | .50 | .50 | 2500 | 5000 | 2500 | .5000 | .5000 | 2538 | 5075 | 2538 | 2500 | 5150 | 2500 | -150  | 2.22   |
| 10000 | 1.04 | .50 | .50 | 2500 | 5000 | 2500 | .5000 | .5000 | 2550 | 5100 | 2550 | 2500 | 5200 | 2500 | -200  | 3.92   |
| 10000 | 1.05 | .50 | .50 | 2500 | 5000 | 2500 | .5000 | .5000 | 2563 | 5125 | 2563 | 2500 | 5250 | 2500 | -250  | 6.10   |
| 10000 | 1.06 | .50 | .50 | 2500 | 5000 | 2500 | .5000 | .5000 | 2575 | 5150 | 2575 | 2500 | 5300 | 2500 | -300  | 8.74   |
| 10000 | 1.07 | .50 | .50 | 2500 | 5000 | 2500 | .5000 | .5000 | 2588 | 5175 | 2588 | 2500 | 5350 | 2500 | -350  | 11.84  |
| 10000 | 1.08 | .50 | .50 | 2500 | 5000 | 2500 | .5000 | .5000 | 2600 | 5200 | 2600 | 2500 | 5400 | 2500 | -400  | 15.38  |
| 10000 | 1.09 | .50 | .50 | 2500 | 5000 | 2500 | .5000 | .5000 | 2613 | 5225 | 2613 | 2500 | 5450 | 2500 | -450  | 19.38  |
| 10000 | 1.10 | .50 | .50 | 2500 | 5000 | 2500 | .5000 | .5000 | 2625 | 5250 | 2625 | 2500 | 5500 | 2500 | -500  | 23.81  |
| 10000 | 1.11 | .50 | .50 | 2500 | 5000 | 2500 | .5000 | .5000 | 2638 | 5275 | 2638 | 2500 | 5550 | 2500 | -550  | 28.67  |
| 10000 | 1.12 | .50 | .50 | 2500 | 5000 | 2500 | .5000 | .5000 | 2650 | 5300 | 2650 | 2500 | 5600 | 2500 | -600  | 33.96  |
| 10000 | 1.13 | .50 | .50 | 2500 | 5000 | 2500 | .5000 | .5000 | 2663 | 5325 | 2663 | 2500 | 5650 | 2500 | -650  | 39.67  |
| 10000 | 1.14 | .50 | .50 | 2500 | 5000 | 2500 | .5000 | .5000 | 2675 | 5350 | 2675 | 2500 | 5700 | 2500 | -700  | 45.79  |
| 10000 | 1.15 | .50 | .50 | 2500 | 5000 | 2500 | .5000 | .5000 | 2688 | 5375 | 2688 | 2500 | 5750 | 2500 | -750  | 52.33  |
| 10000 | 1.16 | .50 | .50 | 2500 | 5000 | 2500 | .5000 | .5000 | 2700 | 5400 | 2700 | 2500 | 5800 | 2500 | -800  | 59.26  |
| 10000 | 1.17 | .50 | .50 | 2500 | 5000 | 2500 | .5000 | .5000 | 2713 | 5425 | 2713 | 2500 | 5850 | 2500 | -850  | 66.59  |
| 10000 | 1.18 | .50 | .50 | 2500 | 5000 | 2500 | .5000 | .5000 | 2725 | 5450 | 2725 | 2500 | 5900 | 2500 | -900  | 74.31  |
| 10000 | 1.19 | .50 | .50 | 2500 | 5000 | 2500 | .5000 | .5000 | 2738 | 5475 | 2738 | 2500 | 5950 | 2500 | -950  | 82.42  |
| 10000 | 1.20 | .50 | .50 | 2500 | 5000 | 2500 | .5000 | .5000 | 2750 | 5500 | 2750 | 2500 | 6000 | 2500 | -1000 | 90.91  |
| 10000 | .80  | .55 | .45 | 3025 | 4950 | 2025 | .5555 | .4445 | 2780 | 4450 | 1780 | 3025 | 3960 | 2025 | 990   | 109.05 |
| 10000 | .81  | .55 | .45 | 3025 | 4950 | 2025 | .5552 | .4448 | 2792 | 4475 | 1792 | 3025 | 4010 | 2025 | 941   | 97.86  |
| 10000 | .82  | .55 | .45 | 3025 | 4950 | 2025 | .5549 | .4451 | 2805 | 4500 | 1805 | 3025 | 4059 | 2025 | 891   | 87.34  |
| 10000 | .83  | .55 | .45 | 3025 | 4950 | 2025 | .5546 | .4454 | 2817 | 4525 | 1817 | 3025 | 4109 | 2025 | 842   | 77.48  |
| 10000 | .84  | .55 | .45 | 3025 | 4950 | 2025 | .5543 | .4457 | 2829 | 4550 | 1829 | 3025 | 4158 | 2025 | 792   | 68.25  |
| 10000 | .85  | .55 | .45 | 3025 | 4950 | 2025 | .5540 | .4460 | 2841 | 4575 | 1841 | 3025 | 4208 | 2025 | 743   | 59.66  |
| 10000 | .86  | .55 | .45 | 3025 | 4950 | 2025 | .5537 | .4463 | 2854 | 4600 | 1854 | 3025 | 4257 | 2025 | 693   | 51.68  |

|       |      |     |     |      |      |      |       |       |      |      |      |      |      |      |      |       |
|-------|------|-----|-----|------|------|------|-------|-------|------|------|------|------|------|------|------|-------|
| 10000 | .87  | .55 | .45 | 3025 | 4950 | 2025 | .5534 | .4466 | 2866 | 4625 | 1866 | 3025 | 4307 | 2025 | 644  | 44.32 |
| 10000 | .88  | .55 | .45 | 3025 | 4950 | 2025 | .5532 | .4468 | 2878 | 4650 | 1878 | 3025 | 4356 | 2025 | 594  | 37.56 |
| 10000 | .89  | .55 | .45 | 3025 | 4950 | 2025 | .5529 | .4471 | 2890 | 4675 | 1890 | 3025 | 4406 | 2025 | 545  | 31.39 |
| 10000 | .90  | .55 | .45 | 3025 | 4950 | 2025 | .5526 | .4474 | 2903 | 4700 | 1903 | 3025 | 4455 | 2025 | 495  | 25.81 |
| 10000 | .91  | .55 | .45 | 3025 | 4950 | 2025 | .5523 | .4477 | 2915 | 4725 | 1915 | 3025 | 4505 | 2025 | 446  | 20.79 |
| 10000 | .92  | .55 | .45 | 3025 | 4950 | 2025 | .5521 | .4479 | 2927 | 4750 | 1927 | 3025 | 4554 | 2025 | 396  | 16.34 |
| 10000 | .93  | .55 | .45 | 3025 | 4950 | 2025 | .5518 | .4482 | 2939 | 4775 | 1939 | 3025 | 4604 | 2025 | 347  | 12.45 |
| 10000 | .94  | .55 | .45 | 3025 | 4950 | 2025 | .5515 | .4485 | 2952 | 4800 | 1952 | 3025 | 4653 | 2025 | 297  | 9.10  |
| 10000 | .95  | .55 | .45 | 3025 | 4950 | 2025 | .5513 | .4487 | 2964 | 4825 | 1964 | 3025 | 4703 | 2025 | 248  | 6.28  |
| 10000 | .96  | .55 | .45 | 3025 | 4950 | 2025 | .5510 | .4490 | 2976 | 4850 | 1976 | 3025 | 4752 | 2025 | 198  | 4.00  |
| 10000 | .97  | .55 | .45 | 3025 | 4950 | 2025 | .5508 | .4492 | 2988 | 4875 | 1988 | 3025 | 4802 | 2025 | 149  | 2.24  |
| 10000 | .98  | .55 | .45 | 3025 | 4950 | 2025 | .5505 | .4495 | 3000 | 4900 | 2000 | 3025 | 4851 | 2025 | 99   | .99   |
| 10000 | .99  | .55 | .45 | 3025 | 4950 | 2025 | .5502 | .4498 | 3013 | 4925 | 2013 | 3025 | 4901 | 2025 | 50   | .25   |
| 10000 | 1.00 | .55 | .45 | 3025 | 4950 | 2025 | .5500 | .4500 | 3025 | 4950 | 2025 | 3025 | 4950 | 2025 | 0    | .00   |
| 10000 | 1.01 | .55 | .45 | 3025 | 4950 | 2025 | .5498 | .4502 | 3037 | 4975 | 2037 | 3025 | 5000 | 2025 | -50  | .24   |
| 10000 | 1.02 | .55 | .45 | 3025 | 4950 | 2025 | .5495 | .4505 | 3050 | 5000 | 2050 | 3025 | 5049 | 2025 | -99  | .97   |
| 10000 | 1.03 | .55 | .45 | 3025 | 4950 | 2025 | .5493 | .4507 | 3062 | 5025 | 2062 | 3025 | 5099 | 2025 | -149 | 2.17  |
| 10000 | 1.04 | .55 | .45 | 3025 | 4950 | 2025 | .5490 | .4510 | 3074 | 5050 | 2074 | 3025 | 5148 | 2025 | -198 | 3.84  |
| 10000 | 1.05 | .55 | .45 | 3025 | 4950 | 2025 | .5488 | .4512 | 3086 | 5075 | 2086 | 3025 | 5198 | 2025 | -248 | 5.97  |
| 10000 | 1.06 | .55 | .45 | 3025 | 4950 | 2025 | .5486 | .4514 | 3099 | 5100 | 2099 | 3025 | 5247 | 2025 | -297 | 8.56  |
| 10000 | 1.07 | .55 | .45 | 3025 | 4950 | 2025 | .5483 | .4517 | 3111 | 5125 | 2111 | 3025 | 5297 | 2025 | -347 | 11.60 |
| 10000 | 1.08 | .55 | .45 | 3025 | 4950 | 2025 | .5481 | .4519 | 3123 | 5150 | 2123 | 3025 | 5346 | 2025 | -396 | 15.07 |
| 10000 | 1.09 | .55 | .45 | 3025 | 4950 | 2025 | .5479 | .4521 | 3135 | 5175 | 2135 | 3025 | 5396 | 2025 | -446 | 18.98 |
| 10000 | 1.10 | .55 | .45 | 3025 | 4950 | 2025 | .5476 | .4524 | 3148 | 5200 | 2148 | 3025 | 5445 | 2025 | -495 | 23.33 |
| 10000 | 1.11 | .55 | .45 | 3025 | 4950 | 2025 | .5474 | .4526 | 3160 | 5225 | 2160 | 3025 | 5495 | 2025 | -545 | 28.09 |
| 10000 | 1.12 | .55 | .45 | 3025 | 4950 | 2025 | .5472 | .4528 | 3172 | 5250 | 2172 | 3025 | 5544 | 2025 | -594 | 33.27 |
| 10000 | 1.13 | .55 | .45 | 3025 | 4950 | 2025 | .5470 | .4530 | 3184 | 5275 | 2184 | 3025 | 5594 | 2025 | -644 | 38.86 |
| 10000 | 1.14 | .55 | .45 | 3025 | 4950 | 2025 | .5468 | .4532 | 3197 | 5300 | 2197 | 3025 | 5643 | 2025 | -693 | 44.86 |
| 10000 | 1.15 | .55 | .45 | 3025 | 4950 | 2025 | .5465 | .4535 | 3209 | 5325 | 2209 | 3025 | 5693 | 2025 | -743 | 51.25 |
| 10000 | 1.16 | .55 | .45 | 3025 | 4950 | 2025 | .5463 | .4537 | 3221 | 5350 | 2221 | 3025 | 5742 | 2025 | -792 | 58.04 |
| 10000 | 1.17 | .55 | .45 | 3025 | 4950 | 2025 | .5461 | .4539 | 3233 | 5375 | 2233 | 3025 | 5792 | 2025 | -842 | 65.22 |
| 10000 | 1.18 | .55 | .45 | 3025 | 4950 | 2025 | .5459 | .4541 | 3246 | 5400 | 2246 | 3025 | 5841 | 2025 | -891 | 72.78 |
| 10000 | 1.19 | .55 | .45 | 3025 | 4950 | 2025 | .5457 | .4543 | 3258 | 5425 | 2258 | 3025 | 5891 | 2025 | -941 | 80.72 |



|       |      |     |     |      |      |      |       |       |      |      |      |      |      |      |      |        |
|-------|------|-----|-----|------|------|------|-------|-------|------|------|------|------|------|------|------|--------|
| 10000 | 1.20 | .55 | .45 | 3025 | 4950 | 2025 | .5455 | .4545 | 3270 | 5450 | 2270 | 3025 | 5940 | 2025 | -990 | 89.03  |
| 10000 | .80  | .60 | .40 | 3600 | 4800 | 1600 | .6106 | .3894 | 3371 | 4299 | 1371 | 3600 | 3840 | 1600 | 960  | 102.96 |
| 10000 | .81  | .60 | .40 | 3600 | 4800 | 1600 | .6100 | .3900 | 3382 | 4324 | 1382 | 3600 | 3888 | 1600 | 912  | 92.37  |
| 10000 | .82  | .60 | .40 | 3600 | 4800 | 1600 | .6095 | .3905 | 3393 | 4349 | 1393 | 3600 | 3936 | 1600 | 864  | 82.42  |
| 10000 | .83  | .60 | .40 | 3600 | 4800 | 1600 | .6089 | .3911 | 3405 | 4374 | 1405 | 3600 | 3984 | 1600 | 816  | 73.09  |
| 10000 | .84  | .60 | .40 | 3600 | 4800 | 1600 | .6083 | .3917 | 3416 | 4399 | 1416 | 3600 | 4032 | 1600 | 768  | 64.37  |
| 10000 | .85  | .60 | .40 | 3600 | 4800 | 1600 | .6078 | .3922 | 3428 | 4424 | 1428 | 3600 | 4080 | 1600 | 720  | 56.25  |
| 10000 | .86  | .60 | .40 | 3600 | 4800 | 1600 | .6072 | .3928 | 3439 | 4450 | 1439 | 3600 | 4128 | 1600 | 672  | 48.73  |
| 10000 | .87  | .60 | .40 | 3600 | 4800 | 1600 | .6067 | .3933 | 3451 | 4475 | 1451 | 3600 | 4176 | 1600 | 624  | 41.78  |
| 10000 | .88  | .60 | .40 | 3600 | 4800 | 1600 | .6061 | .3939 | 3462 | 4500 | 1462 | 3600 | 4224 | 1600 | 576  | 35.40  |
| 10000 | .89  | .60 | .40 | 3600 | 4800 | 1600 | .6056 | .3944 | 3474 | 4525 | 1474 | 3600 | 4272 | 1600 | 528  | 29.58  |
| 10000 | .90  | .60 | .40 | 3600 | 4800 | 1600 | .6050 | .3950 | 3485 | 4550 | 1485 | 3600 | 4320 | 1600 | 480  | 24.31  |
| 10000 | .91  | .60 | .40 | 3600 | 4800 | 1600 | .6045 | .3955 | 3497 | 4575 | 1497 | 3600 | 4368 | 1600 | 432  | 19.58  |
| 10000 | .92  | .60 | .40 | 3600 | 4800 | 1600 | .6040 | .3960 | 3508 | 4600 | 1508 | 3600 | 4416 | 1600 | 384  | 15.39  |
| 10000 | .93  | .60 | .40 | 3600 | 4800 | 1600 | .6035 | .3965 | 3519 | 4625 | 1519 | 3600 | 4464 | 1600 | 336  | 11.72  |
| 10000 | .94  | .60 | .40 | 3600 | 4800 | 1600 | .6030 | .3970 | 3531 | 4650 | 1531 | 3600 | 4512 | 1600 | 288  | 8.56   |
| 10000 | .95  | .60 | .40 | 3600 | 4800 | 1600 | .6025 | .3975 | 3542 | 4675 | 1542 | 3600 | 4560 | 1600 | 240  | 5.91   |
| 10000 | .96  | .60 | .40 | 3600 | 4800 | 1600 | .6020 | .3980 | 3554 | 4700 | 1554 | 3600 | 4608 | 1600 | 192  | 3.76   |
| 10000 | .97  | .60 | .40 | 3600 | 4800 | 1600 | .6015 | .3985 | 3565 | 4725 | 1565 | 3600 | 4656 | 1600 | 144  | 2.11   |
| 10000 | .98  | .60 | .40 | 3600 | 4800 | 1600 | .6010 | .3990 | 3577 | 4750 | 1577 | 3600 | 4704 | 1600 | 96   | .93    |
| 10000 | .99  | .60 | .40 | 3600 | 4800 | 1600 | .6005 | .3995 | 3588 | 4775 | 1588 | 3600 | 4752 | 1600 | 48   | .23    |
| 10000 | 1.00 | .60 | .40 | 3600 | 4800 | 1600 | .6000 | .4000 | 3600 | 4800 | 1600 | 3600 | 4800 | 1600 | 0    | .00    |
| 10000 | 1.01 | .60 | .40 | 3600 | 4800 | 1600 | .5995 | .4005 | 3612 | 4825 | 1612 | 3600 | 4848 | 1600 | -48  | .23    |
| 10000 | 1.02 | .60 | .40 | 3600 | 4800 | 1600 | .5990 | .4010 | 3623 | 4850 | 1623 | 3600 | 4896 | 1600 | -96  | .91    |
| 10000 | 1.03 | .60 | .40 | 3600 | 4800 | 1600 | .5986 | .4014 | 3635 | 4875 | 1635 | 3600 | 4944 | 1600 | -144 | 2.04   |
| 10000 | 1.04 | .60 | .40 | 3600 | 4800 | 1600 | .5981 | .4019 | 3646 | 4900 | 1646 | 3600 | 4992 | 1600 | -192 | 3.61   |
| 10000 | 1.05 | .60 | .40 | 3600 | 4800 | 1600 | .5977 | .4023 | 3658 | 4925 | 1658 | 3600 | 5040 | 1600 | -240 | 5.61   |
| 10000 | 1.06 | .60 | .40 | 3600 | 4800 | 1600 | .5972 | .4028 | 3669 | 4950 | 1669 | 3600 | 5088 | 1600 | -288 | 8.04   |
| 10000 | 1.07 | .60 | .40 | 3600 | 4800 | 1600 | .5967 | .4033 | 3681 | 4975 | 1681 | 3600 | 5136 | 1600 | -336 | 10.89  |
| 10000 | 1.08 | .60 | .40 | 3600 | 4800 | 1600 | .5963 | .4037 | 3692 | 4999 | 1692 | 3600 | 5184 | 1600 | -384 | 14.16  |
| 10000 | 1.09 | .60 | .40 | 3600 | 4800 | 1600 | .5959 | .4041 | 3704 | 5024 | 1704 | 3600 | 5232 | 1600 | -432 | 17.83  |
| 10000 | 1.10 | .60 | .40 | 3600 | 4800 | 1600 | .5954 | .4046 | 3715 | 5049 | 1715 | 3600 | 5280 | 1600 | -480 | 21.91  |

|       |      |     |     |      |      |      |       |       |      |      |      |      |      |      |      |       |
|-------|------|-----|-----|------|------|------|-------|-------|------|------|------|------|------|------|------|-------|
| 10000 | 1.11 | .60 | .40 | 3600 | 4800 | 1600 | .5950 | .4050 | 3727 | 5074 | 1727 | 3600 | 5328 | 1600 | -528 | 26.38 |
| 10000 | 1.12 | .60 | .40 | 3600 | 4800 | 1600 | .5946 | .4054 | 3739 | 5099 | 1739 | 3600 | 5376 | 1600 | -576 | 31.24 |
| 10000 | 1.13 | .60 | .40 | 3600 | 4800 | 1600 | .5941 | .4059 | 3750 | 5124 | 1750 | 3600 | 5424 | 1600 | -624 | 36.48 |
| 10000 | 1.14 | .60 | .40 | 3600 | 4800 | 1600 | .5937 | .4063 | 3762 | 5149 | 1762 | 3600 | 5472 | 1600 | -672 | 42.11 |
| 10000 | 1.15 | .60 | .40 | 3600 | 4800 | 1600 | .5933 | .4067 | 3773 | 5173 | 1773 | 3600 | 5520 | 1600 | -720 | 48.11 |
| 10000 | 1.16 | .60 | .40 | 3600 | 4800 | 1600 | .5929 | .4071 | 3785 | 5198 | 1785 | 3600 | 5568 | 1600 | -768 | 54.48 |
| 10000 | 1.17 | .60 | .40 | 3600 | 4800 | 1600 | .5925 | .4075 | 3796 | 5223 | 1796 | 3600 | 5616 | 1600 | -816 | 61.21 |
| 10000 | 1.18 | .60 | .40 | 3600 | 4800 | 1600 | .5920 | .4080 | 3808 | 5248 | 1808 | 3600 | 5664 | 1600 | -864 | 68.30 |
| 10000 | 1.19 | .60 | .40 | 3600 | 4800 | 1600 | .5916 | .4084 | 3820 | 5273 | 1820 | 3600 | 5712 | 1600 | -912 | 75.74 |
| 10000 | 1.20 | .60 | .40 | 3600 | 4800 | 1600 | .5912 | .4088 | 3831 | 5298 | 1831 | 3600 | 5760 | 1600 | -960 | 83.53 |
| 10000 | .80  | .65 | .35 | 4225 | 4550 | 1225 | .6650 | .3350 | 4020 | 4050 | 1020 | 4225 | 3640 | 1225 | 910  | 93.14 |
| 10000 | .81  | .65 | .35 | 4225 | 4550 | 1225 | .6642 | .3358 | 4030 | 4075 | 1030 | 4225 | 3686 | 1225 | 865  | 83.53 |
| 10000 | .82  | .65 | .35 | 4225 | 4550 | 1225 | .6634 | .3366 | 4040 | 4100 | 1040 | 4225 | 3731 | 1225 | 819  | 74.50 |
| 10000 | .83  | .65 | .35 | 4225 | 4550 | 1225 | .6626 | .3374 | 4050 | 4126 | 1050 | 4225 | 3777 | 1225 | 774  | 66.04 |
| 10000 | .84  | .65 | .35 | 4225 | 4550 | 1225 | .6618 | .3382 | 4061 | 4151 | 1061 | 4225 | 3822 | 1225 | 728  | 58.14 |
| 10000 | .85  | .65 | .35 | 4225 | 4550 | 1225 | .6610 | .3390 | 4071 | 4176 | 1071 | 4225 | 3868 | 1225 | 683  | 50.78 |
| 10000 | .86  | .65 | .35 | 4225 | 4550 | 1225 | .6602 | .3398 | 4081 | 4201 | 1081 | 4225 | 3913 | 1225 | 637  | 43.97 |
| 10000 | .87  | .65 | .35 | 4225 | 4550 | 1225 | .6594 | .3406 | 4091 | 4226 | 1091 | 4225 | 3959 | 1225 | 592  | 37.69 |
| 10000 | .88  | .65 | .35 | 4225 | 4550 | 1225 | .6587 | .3413 | 4101 | 4251 | 1101 | 4225 | 4004 | 1225 | 546  | 31.92 |
| 10000 | .89  | .65 | .35 | 4225 | 4550 | 1225 | .6579 | .3421 | 4112 | 4276 | 1112 | 4225 | 4050 | 1225 | 501  | 26.66 |
| 10000 | .90  | .65 | .35 | 4225 | 4550 | 1225 | .6572 | .3428 | 4122 | 4301 | 1122 | 4225 | 4095 | 1225 | 455  | 21.91 |
| 10000 | .91  | .65 | .35 | 4225 | 4550 | 1225 | .6564 | .3436 | 4132 | 4326 | 1132 | 4225 | 4141 | 1225 | 410  | 17.64 |
| 10000 | .92  | .65 | .35 | 4225 | 4550 | 1225 | .6557 | .3443 | 4142 | 4351 | 1142 | 4225 | 4186 | 1225 | 364  | 13.86 |
| 10000 | .93  | .65 | .35 | 4225 | 4550 | 1225 | .6549 | .3451 | 4153 | 4376 | 1153 | 4225 | 4232 | 1225 | 319  | 10.55 |
| 10000 | .94  | .65 | .35 | 4225 | 4550 | 1225 | .6542 | .3458 | 4163 | 4401 | 1163 | 4225 | 4277 | 1225 | 273  | 7.71  |
| 10000 | .95  | .65 | .35 | 4225 | 4550 | 1225 | .6535 | .3465 | 4173 | 4426 | 1173 | 4225 | 4323 | 1225 | 228  | 5.32  |
| 10000 | .96  | .65 | .35 | 4225 | 4550 | 1225 | .6528 | .3472 | 4184 | 4451 | 1184 | 4225 | 4368 | 1225 | 182  | 3.39  |
| 10000 | .97  | .65 | .35 | 4225 | 4550 | 1225 | .6521 | .3479 | 4194 | 4476 | 1194 | 4225 | 4414 | 1225 | 137  | 1.89  |
| 10000 | .98  | .65 | .35 | 4225 | 4550 | 1225 | .6514 | .3486 | 4204 | 4500 | 1204 | 4225 | 4459 | 1225 | 91   | .84   |
| 10000 | .99  | .65 | .35 | 4225 | 4550 | 1225 | .6507 | .3493 | 4215 | 4525 | 1215 | 4225 | 4505 | 1225 | 46   | .21   |
| 10000 | 1.00 | .65 | .35 | 4225 | 4550 | 1225 | .6500 | .3500 | 4225 | 4550 | 1225 | 4225 | 4550 | 1225 | 0    | .00   |
| 10000 | 1.01 | .65 | .35 | 4225 | 4550 | 1225 | .6493 | .3507 | 4235 | 4575 | 1235 | 4225 | 4596 | 1225 | -46  | .21   |
| 10000 | 1.02 | .65 | .35 | 4225 | 4550 | 1225 | .6486 | .3514 | 4246 | 4600 | 1246 | 4225 | 4641 | 1225 | -91  | .82   |

|       |      |     |     |      |      |      |       |       |      |      |      |      |      |      |      |       |
|-------|------|-----|-----|------|------|------|-------|-------|------|------|------|------|------|------|------|-------|
| 10000 | 1.03 | .65 | .35 | 4225 | 4550 | 1225 | .6480 | .3520 | 4256 | 4624 | 1256 | 4225 | 4687 | 1225 | -137 | 1.83  |
| 10000 | 1.04 | .65 | .35 | 4225 | 4550 | 1225 | .6473 | .3527 | 4266 | 4649 | 1266 | 4225 | 4732 | 1225 | -182 | 3.24  |
| 10000 | 1.05 | .65 | .35 | 4225 | 4550 | 1225 | .6467 | .3533 | 4277 | 4674 | 1277 | 4225 | 4778 | 1225 | -228 | 5.04  |
| 10000 | 1.06 | .65 | .35 | 4225 | 4550 | 1225 | .6460 | .3540 | 4287 | 4698 | 1287 | 4225 | 4823 | 1225 | -273 | 7.22  |
| 10000 | 1.07 | .65 | .35 | 4225 | 4550 | 1225 | .6454 | .3546 | 4298 | 4723 | 1298 | 4225 | 4869 | 1225 | -319 | 9.77  |
| 10000 | 1.08 | .65 | .35 | 4225 | 4550 | 1225 | .6447 | .3553 | 4308 | 4748 | 1308 | 4225 | 4914 | 1225 | -364 | 12.70 |
| 10000 | 1.09 | .65 | .35 | 4225 | 4550 | 1225 | .6441 | .3559 | 4319 | 4772 | 1319 | 4225 | 4960 | 1225 | -410 | 15.99 |
| 10000 | 1.10 | .65 | .35 | 4225 | 4550 | 1225 | .6435 | .3565 | 4329 | 4797 | 1329 | 4225 | 5005 | 1225 | -455 | 19.64 |
| 10000 | 1.11 | .65 | .35 | 4225 | 4550 | 1225 | .6429 | .3571 | 4339 | 4822 | 1339 | 4225 | 5051 | 1225 | -501 | 23.64 |
| 10000 | 1.12 | .65 | .35 | 4225 | 4550 | 1225 | .6422 | .3578 | 4350 | 4846 | 1350 | 4225 | 5096 | 1225 | -546 | 28.00 |
| 10000 | 1.13 | .65 | .35 | 4225 | 4550 | 1225 | .6416 | .3584 | 4360 | 4871 | 1360 | 4225 | 5142 | 1225 | -592 | 32.69 |
| 10000 | 1.14 | .65 | .35 | 4225 | 4550 | 1225 | .6410 | .3590 | 4371 | 4895 | 1371 | 4225 | 5187 | 1225 | -637 | 37.73 |
| 10000 | 1.15 | .65 | .35 | 4225 | 4550 | 1225 | .6404 | .3596 | 4381 | 4920 | 1381 | 4225 | 5233 | 1225 | -683 | 43.10 |
| 10000 | 1.16 | .65 | .35 | 4225 | 4550 | 1225 | .6398 | .3602 | 4392 | 4945 | 1392 | 4225 | 5278 | 1225 | -728 | 48.79 |
| 10000 | 1.17 | .65 | .35 | 4225 | 4550 | 1225 | .6392 | .3608 | 4402 | 4969 | 1402 | 4225 | 5324 | 1225 | -774 | 54.81 |
| 10000 | 1.18 | .65 | .35 | 4225 | 4550 | 1225 | .6386 | .3614 | 4413 | 4994 | 1413 | 4225 | 5369 | 1225 | -819 | 61.16 |
| 10000 | 1.19 | .65 | .35 | 4225 | 4550 | 1225 | .6381 | .3619 | 4423 | 5018 | 1423 | 4225 | 5415 | 1225 | -865 | 67.81 |
| 10000 | 1.20 | .65 | .35 | 4225 | 4550 | 1225 | .6375 | .3625 | 4434 | 5043 | 1434 | 4225 | 5460 | 1225 | -910 | 74.78 |
| 10000 | .80  | .70 | .30 | 4900 | 4200 | 900  | .7183 | .2817 | 4727 | 3707 | 727  | 4900 | 3360 | 900  | 840  | 80.11 |
| 10000 | .81  | .70 | .30 | 4900 | 4200 | 900  | .7173 | .2827 | 4735 | 3732 | 735  | 4900 | 3402 | 900  | 798  | 71.80 |
| 10000 | .82  | .70 | .30 | 4900 | 4200 | 900  | .7164 | .2836 | 4744 | 3757 | 744  | 4900 | 3444 | 900  | 756  | 64.00 |
| 10000 | .83  | .70 | .30 | 4900 | 4200 | 900  | .7154 | .2846 | 4752 | 3781 | 752  | 4900 | 3486 | 900  | 714  | 56.70 |
| 10000 | .84  | .70 | .30 | 4900 | 4200 | 900  | .7144 | .2856 | 4761 | 3806 | 761  | 4900 | 3528 | 900  | 672  | 49.89 |
| 10000 | .85  | .70 | .30 | 4900 | 4200 | 900  | .7134 | .2866 | 4769 | 3831 | 769  | 4900 | 3570 | 900  | 630  | 43.56 |
| 10000 | .86  | .70 | .30 | 4900 | 4200 | 900  | .7125 | .2875 | 4778 | 3856 | 778  | 4900 | 3612 | 900  | 588  | 37.69 |
| 10000 | .87  | .70 | .30 | 4900 | 4200 | 900  | .7116 | .2884 | 4787 | 3881 | 787  | 4900 | 3654 | 900  | 546  | 32.29 |
| 10000 | .88  | .70 | .30 | 4900 | 4200 | 900  | .7106 | .2894 | 4795 | 3906 | 795  | 4900 | 3696 | 900  | 504  | 27.33 |
| 10000 | .89  | .70 | .30 | 4900 | 4200 | 900  | .7097 | .2903 | 4804 | 3930 | 804  | 4900 | 3738 | 900  | 462  | 22.82 |
| 10000 | .90  | .70 | .30 | 4900 | 4200 | 900  | .7088 | .2912 | 4813 | 3955 | 813  | 4900 | 3780 | 900  | 420  | 18.74 |
| 10000 | .91  | .70 | .30 | 4900 | 4200 | 900  | .7079 | .2921 | 4821 | 3980 | 821  | 4900 | 3822 | 900  | 378  | 15.09 |
| 10000 | .92  | .70 | .30 | 4900 | 4200 | 900  | .7070 | .2930 | 4830 | 4004 | 830  | 4900 | 3864 | 900  | 336  | 11.84 |
| 10000 | .93  | .70 | .30 | 4900 | 4200 | 900  | .7061 | .2939 | 4839 | 4029 | 839  | 4900 | 3906 | 900  | 294  | 9.01  |
| 10000 | .94  | .70 | .30 | 4900 | 4200 | 900  | .7052 | .2948 | 4847 | 4053 | 847  | 4900 | 3948 | 900  | 252  | 6.58  |

|       |      |     |     |      |      |     |       |       |      |      |      |      |      |     |      |       |
|-------|------|-----|-----|------|------|-----|-------|-------|------|------|------|------|------|-----|------|-------|
| 10000 | .95  | .70 | .30 | 4900 | 4200 | 900 | .7043 | .2957 | 4856 | 4078 | 856  | 4900 | 3990 | 900 | 210  | 4.54  |
| 10000 | .96  | .70 | .30 | 4900 | 4200 | 900 | .7034 | .2966 | 4865 | 4102 | 865  | 4900 | 4032 | 900 | 168  | 2.89  |
| 10000 | .97  | .70 | .30 | 4900 | 4200 | 900 | .7026 | .2974 | 4874 | 4127 | 874  | 4900 | 4074 | 900 | 126  | 1.62  |
| 10000 | .98  | .70 | .30 | 4900 | 4200 | 900 | .7017 | .2983 | 4882 | 4151 | 882  | 4900 | 4116 | 900 | 84   | .71   |
| 10000 | .99  | .70 | .30 | 4900 | 4200 | 900 | .7008 | .2992 | 4891 | 4176 | 891  | 4900 | 4158 | 900 | 42   | .18   |
| 10000 | 1.00 | .70 | .30 | 4900 | 4200 | 900 | .7000 | .3000 | 4900 | 4200 | 900  | 4900 | 4200 | 900 | 0    | .00   |
| 10000 | 1.01 | .70 | .30 | 4900 | 4200 | 900 | .6992 | .3008 | 4909 | 4224 | 909  | 4900 | 4242 | 900 | -42  | .18   |
| 10000 | 1.02 | .70 | .30 | 4900 | 4200 | 900 | .6983 | .3017 | 4918 | 4249 | 918  | 4900 | 4284 | 900 | -84  | .70   |
| 10000 | 1.03 | .70 | .30 | 4900 | 4200 | 900 | .6975 | .3025 | 4927 | 4273 | 927  | 4900 | 4326 | 900 | -126 | 1.56  |
| 10000 | 1.04 | .70 | .30 | 4900 | 4200 | 900 | .6967 | .3033 | 4935 | 4297 | 935  | 4900 | 4368 | 900 | -168 | 2.76  |
| 10000 | 1.05 | .70 | .30 | 4900 | 4200 | 900 | .6959 | .3041 | 4944 | 4321 | 944  | 4900 | 4410 | 900 | -210 | 4.29  |
| 10000 | 1.06 | .70 | .30 | 4900 | 4200 | 900 | .6951 | .3049 | 4953 | 4346 | 953  | 4900 | 4452 | 900 | -252 | 6.14  |
| 10000 | 1.07 | .70 | .30 | 4900 | 4200 | 900 | .6943 | .3057 | 4962 | 4370 | 962  | 4900 | 4494 | 900 | -294 | 8.31  |
| 10000 | 1.08 | .70 | .30 | 4900 | 4200 | 900 | .6935 | .3065 | 4971 | 4394 | 971  | 4900 | 4536 | 900 | -336 | 10.79 |
| 10000 | 1.09 | .70 | .30 | 4900 | 4200 | 900 | .6927 | .3073 | 4980 | 4418 | 980  | 4900 | 4578 | 900 | -378 | 13.59 |
| 10000 | 1.10 | .70 | .30 | 4900 | 4200 | 900 | .6919 | .3081 | 4989 | 4442 | 989  | 4900 | 4620 | 900 | -420 | 16.68 |
| 10000 | 1.11 | .70 | .30 | 4900 | 4200 | 900 | .6912 | .3088 | 4998 | 4466 | 998  | 4900 | 4662 | 900 | -462 | 20.08 |
| 10000 | 1.12 | .70 | .30 | 4900 | 4200 | 900 | .6904 | .3096 | 5007 | 4490 | 1007 | 4900 | 4704 | 900 | -504 | 23.77 |
| 10000 | 1.13 | .70 | .30 | 4900 | 4200 | 900 | .6896 | .3104 | 5016 | 4514 | 1016 | 4900 | 4746 | 900 | -546 | 27.75 |
| 10000 | 1.14 | .70 | .30 | 4900 | 4200 | 900 | .6889 | .3111 | 5025 | 4538 | 1025 | 4900 | 4788 | 900 | -588 | 32.02 |
| 10000 | 1.15 | .70 | .30 | 4900 | 4200 | 900 | .6881 | .3119 | 5034 | 4562 | 1034 | 4900 | 4830 | 900 | -630 | 36.57 |
| 10000 | 1.16 | .70 | .30 | 4900 | 4200 | 900 | .6874 | .3126 | 5043 | 4586 | 1043 | 4900 | 4872 | 900 | -672 | 41.39 |
| 10000 | 1.17 | .70 | .30 | 4900 | 4200 | 900 | .6867 | .3133 | 5052 | 4610 | 1052 | 4900 | 4914 | 900 | -714 | 46.49 |
| 10000 | 1.18 | .70 | .30 | 4900 | 4200 | 900 | .6859 | .3141 | 5061 | 4634 | 1061 | 4900 | 4956 | 900 | -756 | 51.85 |
| 10000 | 1.19 | .70 | .30 | 4900 | 4200 | 900 | .6852 | .3148 | 5070 | 4658 | 1070 | 4900 | 4998 | 900 | -798 | 57.49 |
| 10000 | 1.20 | .70 | .30 | 4900 | 4200 | 900 | .6845 | .3155 | 5079 | 4682 | 1079 | 4900 | 5040 | 900 | -840 | 63.38 |
| 10000 | .80  | .75 | .25 | 5625 | 3750 | 625 | .7703 | .2297 | 5488 | 3274 | 488  | 5625 | 3000 | 625 | 750  | 64.63 |
| 10000 | .81  | .75 | .25 | 5625 | 3750 | 625 | .7692 | .2308 | 5495 | 3298 | 495  | 5625 | 3038 | 625 | 713  | 57.89 |
| 10000 | .82  | .75 | .25 | 5625 | 3750 | 625 | .7681 | .2319 | 5501 | 3322 | 501  | 5625 | 3075 | 625 | 675  | 51.56 |
| 10000 | .83  | .75 | .25 | 5625 | 3750 | 625 | .7670 | .2330 | 5508 | 3346 | 508  | 5625 | 3113 | 625 | 638  | 45.64 |
| 10000 | .84  | .75 | .25 | 5625 | 3750 | 625 | .7660 | .2340 | 5515 | 3370 | 515  | 5625 | 3150 | 625 | 600  | 40.13 |
| 10000 | .85  | .75 | .25 | 5625 | 3750 | 625 | .7649 | .2351 | 5522 | 3394 | 522  | 5625 | 3188 | 625 | 563  | 35.01 |
| 10000 | .86  | .75 | .25 | 5625 | 3750 | 625 | .7639 | .2361 | 5528 | 3418 | 528  | 5625 | 3225 | 625 | 525  | 30.28 |

|       |      |     |     |      |      |     |       |       |      |      |     |      |      |     |      |       |
|-------|------|-----|-----|------|------|-----|-------|-------|------|------|-----|------|------|-----|------|-------|
| 10000 | .87  | .75 | .25 | 5625 | 3750 | 625 | .7628 | .2372 | 5535 | 3442 | 535 | 5625 | 3263 | 625 | 488  | 25.92 |
| 10000 | .88  | .75 | .25 | 5625 | 3750 | 625 | .7618 | .2382 | 5542 | 3466 | 542 | 5625 | 3300 | 625 | 450  | 21.93 |
| 10000 | .89  | .75 | .25 | 5625 | 3750 | 625 | .7608 | .2392 | 5549 | 3490 | 549 | 5625 | 3338 | 625 | 413  | 18.30 |
| 10000 | .90  | .75 | .25 | 5625 | 3750 | 625 | .7597 | .2403 | 5556 | 3514 | 556 | 5625 | 3375 | 625 | 375  | 15.02 |
| 10000 | .91  | .75 | .25 | 5625 | 3750 | 625 | .7587 | .2413 | 5562 | 3538 | 562 | 5625 | 3413 | 625 | 338  | 12.08 |
| 10000 | .92  | .75 | .25 | 5625 | 3750 | 625 | .7577 | .2423 | 5569 | 3561 | 569 | 5625 | 3450 | 625 | 300  | 9.48  |
| 10000 | .93  | .75 | .25 | 5625 | 3750 | 625 | .7567 | .2433 | 5576 | 3585 | 576 | 5625 | 3488 | 625 | 263  | 7.21  |
| 10000 | .94  | .75 | .25 | 5625 | 3750 | 625 | .7558 | .2442 | 5583 | 3609 | 583 | 5625 | 3525 | 625 | 225  | 5.26  |
| 10000 | .95  | .75 | .25 | 5625 | 3750 | 625 | .7548 | .2452 | 5590 | 3632 | 590 | 5625 | 3563 | 625 | 188  | 3.63  |
| 10000 | .96  | .75 | .25 | 5625 | 3750 | 625 | .7538 | .2462 | 5597 | 3656 | 597 | 5625 | 3600 | 625 | 150  | 2.31  |
| 10000 | .97  | .75 | .25 | 5625 | 3750 | 625 | .7528 | .2472 | 5604 | 3680 | 604 | 5625 | 3638 | 625 | 113  | 1.29  |
| 10000 | .98  | .75 | .25 | 5625 | 3750 | 625 | .7519 | .2481 | 5611 | 3703 | 611 | 5625 | 3675 | 625 | 75   | .57   |
| 10000 | .99  | .75 | .25 | 5625 | 3750 | 625 | .7509 | .2491 | 5618 | 3727 | 618 | 5625 | 3713 | 625 | 38   | .14   |
| 10000 | 1.00 | .75 | .25 | 5625 | 3750 | 625 | .7500 | .2500 | 5625 | 3750 | 625 | 5625 | 3750 | 625 | 0    | .00   |
| 10000 | 1.01 | .75 | .25 | 5625 | 3750 | 625 | .7491 | .2509 | 5632 | 3773 | 632 | 5625 | 3788 | 625 | -38  | .14   |
| 10000 | 1.02 | .75 | .25 | 5625 | 3750 | 625 | .7481 | .2519 | 5639 | 3797 | 639 | 5625 | 3825 | 625 | -75  | .56   |
| 10000 | 1.03 | .75 | .25 | 5625 | 3750 | 625 | .7472 | .2528 | 5646 | 3820 | 646 | 5625 | 3863 | 625 | -113 | 1.24  |
| 10000 | 1.04 | .75 | .25 | 5625 | 3750 | 625 | .7463 | .2537 | 5653 | 3843 | 653 | 5625 | 3900 | 625 | -150 | 2.20  |
| 10000 | 1.05 | .75 | .25 | 5625 | 3750 | 625 | .7454 | .2546 | 5660 | 3867 | 660 | 5625 | 3938 | 625 | -188 | 3.41  |
| 10000 | 1.06 | .75 | .25 | 5625 | 3750 | 625 | .7445 | .2555 | 5667 | 3890 | 667 | 5625 | 3975 | 625 | -225 | 4.88  |
| 10000 | 1.07 | .75 | .25 | 5625 | 3750 | 625 | .7436 | .2564 | 5675 | 3913 | 675 | 5625 | 4013 | 625 | -263 | 6.61  |
| 10000 | 1.08 | .75 | .25 | 5625 | 3750 | 625 | .7427 | .2573 | 5682 | 3936 | 682 | 5625 | 4050 | 625 | -300 | 8.58  |
| 10000 | 1.09 | .75 | .25 | 5625 | 3750 | 625 | .7418 | .2582 | 5689 | 3960 | 689 | 5625 | 4088 | 625 | -338 | 10.79 |
| 10000 | 1.10 | .75 | .25 | 5625 | 3750 | 625 | .7410 | .2590 | 5696 | 3983 | 696 | 5625 | 4125 | 625 | -375 | 13.25 |
| 10000 | 1.11 | .75 | .25 | 5625 | 3750 | 625 | .7401 | .2599 | 5703 | 4006 | 703 | 5625 | 4163 | 625 | -413 | 15.94 |
| 10000 | 1.12 | .75 | .25 | 5625 | 3750 | 625 | .7392 | .2608 | 5711 | 4029 | 711 | 5625 | 4200 | 625 | -450 | 18.86 |
| 10000 | 1.13 | .75 | .25 | 5625 | 3750 | 625 | .7384 | .2616 | 5718 | 4052 | 718 | 5625 | 4238 | 625 | -488 | 22.02 |
| 10000 | 1.14 | .75 | .25 | 5625 | 3750 | 625 | .7375 | .2625 | 5725 | 4075 | 725 | 5625 | 4275 | 625 | -525 | 25.39 |
| 10000 | 1.15 | .75 | .25 | 5625 | 3750 | 625 | .7367 | .2633 | 5732 | 4098 | 732 | 5625 | 4313 | 625 | -563 | 28.99 |
| 10000 | 1.16 | .75 | .25 | 5625 | 3750 | 625 | .7358 | .2642 | 5740 | 4121 | 740 | 5625 | 4350 | 625 | -600 | 32.81 |
| 10000 | 1.17 | .75 | .25 | 5625 | 3750 | 625 | .7350 | .2650 | 5747 | 4144 | 747 | 5625 | 4388 | 625 | -638 | 36.84 |
| 10000 | 1.18 | .75 | .25 | 5625 | 3750 | 625 | .7342 | .2658 | 5754 | 4167 | 754 | 5625 | 4425 | 625 | -675 | 41.08 |
| 10000 | 1.19 | .75 | .25 | 5625 | 3750 | 625 | .7334 | .2666 | 5762 | 4189 | 762 | 5625 | 4463 | 625 | -713 | 45.53 |

|       |      |     |     |      |      |     |       |       |      |      |     |      |      |     |      |       |
|-------|------|-----|-----|------|------|-----|-------|-------|------|------|-----|------|------|-----|------|-------|
| 10000 | 1.20 | .75 | .25 | 5625 | 3750 | 625 | .7326 | .2674 | 5769 | 4212 | 769 | 5625 | 4500 | 625 | -750 | 50.18 |
| 10000 | .80  | .80 | .20 | 6400 | 3200 | 400 | .8205 | .1795 | 6302 | 2757 | 302 | 6400 | 2560 | 400 | 640  | 47.76 |
| 10000 | .81  | .80 | .20 | 6400 | 3200 | 400 | .8194 | .1806 | 6306 | 2779 | 306 | 6400 | 2592 | 400 | 608  | 42.73 |
| 10000 | .82  | .80 | .20 | 6400 | 3200 | 400 | .8183 | .1817 | 6311 | 2802 | 311 | 6400 | 2624 | 400 | 576  | 38.02 |
| 10000 | .83  | .80 | .20 | 6400 | 3200 | 400 | .8173 | .1827 | 6316 | 2824 | 316 | 6400 | 2656 | 400 | 544  | 33.63 |
| 10000 | .84  | .80 | .20 | 6400 | 3200 | 400 | .8162 | .1838 | 6321 | 2847 | 321 | 6400 | 2688 | 400 | 512  | 29.55 |
| 10000 | .85  | .80 | .20 | 6400 | 3200 | 400 | .8151 | .1849 | 6325 | 2869 | 325 | 6400 | 2720 | 400 | 480  | 25.76 |
| 10000 | .86  | .80 | .20 | 6400 | 3200 | 400 | .8141 | .1859 | 6330 | 2892 | 330 | 6400 | 2752 | 400 | 448  | 22.26 |
| 10000 | .87  | .80 | .20 | 6400 | 3200 | 400 | .8130 | .1870 | 6335 | 2914 | 335 | 6400 | 2784 | 400 | 416  | 19.04 |
| 10000 | .88  | .80 | .20 | 6400 | 3200 | 400 | .8120 | .1880 | 6340 | 2936 | 340 | 6400 | 2816 | 400 | 384  | 16.09 |
| 10000 | .89  | .80 | .20 | 6400 | 3200 | 400 | .8109 | .1891 | 6345 | 2958 | 345 | 6400 | 2848 | 400 | 352  | 13.42 |
| 10000 | .90  | .80 | .20 | 6400 | 3200 | 400 | .8099 | .1901 | 6350 | 2980 | 350 | 6400 | 2880 | 400 | 320  | 11.01 |
| 10000 | .91  | .80 | .20 | 6400 | 3200 | 400 | .8089 | .1911 | 6355 | 3003 | 355 | 6400 | 2912 | 400 | 288  | 8.85  |
| 10000 | .92  | .80 | .20 | 6400 | 3200 | 400 | .8079 | .1921 | 6360 | 3025 | 360 | 6400 | 2944 | 400 | 256  | 6.94  |
| 10000 | .93  | .80 | .20 | 6400 | 3200 | 400 | .8069 | .1931 | 6365 | 3047 | 365 | 6400 | 2976 | 400 | 224  | 5.27  |
| 10000 | .94  | .80 | .20 | 6400 | 3200 | 400 | .8059 | .1941 | 6370 | 3069 | 370 | 6400 | 3008 | 400 | 192  | 3.85  |
| 10000 | .95  | .80 | .20 | 6400 | 3200 | 400 | .8049 | .1951 | 6375 | 3091 | 375 | 6400 | 3040 | 400 | 160  | 2.65  |
| 10000 | .96  | .80 | .20 | 6400 | 3200 | 400 | .8039 | .1961 | 6380 | 3113 | 380 | 6400 | 3072 | 400 | 128  | 1.68  |
| 10000 | .97  | .80 | .20 | 6400 | 3200 | 400 | .8029 | .1971 | 6385 | 3135 | 385 | 6400 | 3104 | 400 | 96   | .94   |
| 10000 | .98  | .80 | .20 | 6400 | 3200 | 400 | .8019 | .1981 | 6390 | 3156 | 390 | 6400 | 3136 | 400 | 64   | .42   |
| 10000 | .99  | .80 | .20 | 6400 | 3200 | 400 | .8010 | .1990 | 6395 | 3178 | 395 | 6400 | 3168 | 400 | 32   | .10   |
| 10000 | 1.00 | .80 | .20 | 6400 | 3200 | 400 | .8000 | .2000 | 6400 | 3200 | 400 | 6400 | 3200 | 400 | 0    | .00   |
| 10000 | 1.01 | .80 | .20 | 6400 | 3200 | 400 | .7990 | .2010 | 6405 | 3222 | 405 | 6400 | 3232 | 400 | -32  | .10   |
| 10000 | 1.02 | .80 | .20 | 6400 | 3200 | 400 | .7981 | .2019 | 6410 | 3243 | 410 | 6400 | 3264 | 400 | -64  | .40   |
| 10000 | 1.03 | .80 | .20 | 6400 | 3200 | 400 | .7971 | .2029 | 6415 | 3265 | 415 | 6400 | 3296 | 400 | -96  | .90   |
| 10000 | 1.04 | .80 | .20 | 6400 | 3200 | 400 | .7962 | .2038 | 6421 | 3287 | 421 | 6400 | 3328 | 400 | -128 | 1.60  |
| 10000 | 1.05 | .80 | .20 | 6400 | 3200 | 400 | .7953 | .2047 | 6426 | 3308 | 426 | 6400 | 3360 | 400 | -160 | 2.48  |
| 10000 | 1.06 | .80 | .20 | 6400 | 3200 | 400 | .7943 | .2057 | 6431 | 3330 | 431 | 6400 | 3392 | 400 | -192 | 3.54  |
| 10000 | 1.07 | .80 | .20 | 6400 | 3200 | 400 | .7934 | .2066 | 6436 | 3351 | 436 | 6400 | 3424 | 400 | -224 | 4.79  |
| 10000 | 1.08 | .80 | .20 | 6400 | 3200 | 400 | .7925 | .2075 | 6442 | 3373 | 442 | 6400 | 3456 | 400 | -256 | 6.22  |
| 10000 | 1.09 | .80 | .20 | 6400 | 3200 | 400 | .7916 | .2084 | 6447 | 3394 | 447 | 6400 | 3488 | 400 | -288 | 7.82  |
| 10000 | 1.10 | .80 | .20 | 6400 | 3200 | 400 | .7907 | .2093 | 6452 | 3416 | 452 | 6400 | 3520 | 400 | -320 | 9.60  |
| 10000 | 1.11 | .80 | .20 | 6400 | 3200 | 400 | .7898 | .2102 | 6457 | 3437 | 457 | 6400 | 3552 | 400 | -352 | 11.55 |

|       |      |     |     |      |      |     |       |       |      |      |     |      |      |     |      |       |
|-------|------|-----|-----|------|------|-----|-------|-------|------|------|-----|------|------|-----|------|-------|
| 10000 | 1.12 | .80 | .20 | 6400 | 3200 | 400 | .7889 | .2111 | 6463 | 3459 | 463 | 6400 | 3584 | 400 | -384 | 13.66 |
| 10000 | 1.13 | .80 | .20 | 6400 | 3200 | 400 | .7880 | .2120 | 6468 | 3480 | 468 | 6400 | 3616 | 400 | -416 | 15.94 |
| 10000 | 1.14 | .80 | .20 | 6400 | 3200 | 400 | .7871 | .2129 | 6473 | 3501 | 473 | 6400 | 3648 | 400 | -448 | 18.37 |
| 10000 | 1.15 | .80 | .20 | 6400 | 3200 | 400 | .7863 | .2137 | 6479 | 3522 | 479 | 6400 | 3680 | 400 | -480 | 20.97 |
| 10000 | 1.16 | .80 | .20 | 6400 | 3200 | 400 | .7854 | .2146 | 6484 | 3544 | 484 | 6400 | 3712 | 400 | -512 | 23.72 |
| 10000 | 1.17 | .80 | .20 | 6400 | 3200 | 400 | .7845 | .2155 | 6490 | 3565 | 490 | 6400 | 3744 | 400 | -544 | 26.62 |
| 10000 | 1.18 | .80 | .20 | 6400 | 3200 | 400 | .7837 | .2163 | 6495 | 3586 | 495 | 6400 | 3776 | 400 | -576 | 29.68 |
| 10000 | 1.19 | .80 | .20 | 6400 | 3200 | 400 | .7828 | .2172 | 6500 | 3607 | 500 | 6400 | 3808 | 400 | -608 | 32.88 |
| 10000 | 1.20 | .80 | .20 | 6400 | 3200 | 400 | .7820 | .2180 | 6506 | 3628 | 506 | 6400 | 3840 | 400 | -640 | 36.23 |
| 10000 | .80  | .85 | .15 | 7225 | 2550 | 225 | .8688 | .1312 | 7163 | 2163 | 163 | 7225 | 2040 | 225 | 510  | 30.85 |
| 10000 | .81  | .85 | .15 | 7225 | 2550 | 225 | .8678 | .1322 | 7166 | 2183 | 166 | 7225 | 2066 | 225 | 485  | 27.57 |
| 10000 | .82  | .85 | .15 | 7225 | 2550 | 225 | .8668 | .1332 | 7169 | 2203 | 169 | 7225 | 2091 | 225 | 459  | 24.51 |
| 10000 | .83  | .85 | .15 | 7225 | 2550 | 225 | .8659 | .1341 | 7172 | 2222 | 172 | 7225 | 2117 | 225 | 434  | 21.66 |
| 10000 | .84  | .85 | .15 | 7225 | 2550 | 225 | .8649 | .1351 | 7175 | 2242 | 175 | 7225 | 2142 | 225 | 408  | 19.01 |
| 10000 | .85  | .85 | .15 | 7225 | 2550 | 225 | .8639 | .1361 | 7178 | 2261 | 178 | 7225 | 2168 | 225 | 383  | 16.55 |
| 10000 | .86  | .85 | .15 | 7225 | 2550 | 225 | .8630 | .1370 | 7181 | 2281 | 181 | 7225 | 2193 | 225 | 357  | 14.29 |
| 10000 | .87  | .85 | .15 | 7225 | 2550 | 225 | .8620 | .1380 | 7184 | 2300 | 184 | 7225 | 2219 | 225 | 332  | 12.21 |
| 10000 | .88  | .85 | .15 | 7225 | 2550 | 225 | .8610 | .1390 | 7187 | 2320 | 187 | 7225 | 2244 | 225 | 306  | 10.31 |
| 10000 | .89  | .85 | .15 | 7225 | 2550 | 225 | .8601 | .1399 | 7190 | 2339 | 190 | 7225 | 2270 | 225 | 281  | 8.59  |
| 10000 | .90  | .85 | .15 | 7225 | 2550 | 225 | .8592 | .1408 | 7193 | 2358 | 193 | 7225 | 2295 | 225 | 255  | 7.04  |
| 10000 | .91  | .85 | .15 | 7225 | 2550 | 225 | .8582 | .1418 | 7196 | 2378 | 196 | 7225 | 2321 | 225 | 230  | 5.65  |
| 10000 | .92  | .85 | .15 | 7225 | 2550 | 225 | .8573 | .1427 | 7200 | 2397 | 200 | 7225 | 2346 | 225 | 204  | 4.43  |
| 10000 | .93  | .85 | .15 | 7225 | 2550 | 225 | .8564 | .1436 | 7203 | 2416 | 203 | 7225 | 2372 | 225 | 179  | 3.36  |
| 10000 | .94  | .85 | .15 | 7225 | 2550 | 225 | .8554 | .1446 | 7206 | 2435 | 206 | 7225 | 2397 | 225 | 153  | 2.45  |
| 10000 | .95  | .85 | .15 | 7225 | 2550 | 225 | .8545 | .1455 | 7209 | 2455 | 209 | 7225 | 2423 | 225 | 128  | 1.69  |
| 10000 | .96  | .85 | .15 | 7225 | 2550 | 225 | .8536 | .1464 | 7212 | 2474 | 212 | 7225 | 2448 | 225 | 102  | 1.07  |
| 10000 | .97  | .85 | .15 | 7225 | 2550 | 225 | .8527 | .1473 | 7215 | 2493 | 215 | 7225 | 2474 | 225 | 77   | .60   |
| 10000 | .98  | .85 | .15 | 7225 | 2550 | 225 | .8518 | .1482 | 7219 | 2512 | 219 | 7225 | 2499 | 225 | 51   | .26   |
| 10000 | .99  | .85 | .15 | 7225 | 2550 | 225 | .8509 | .1491 | 7222 | 2531 | 222 | 7225 | 2525 | 225 | 26   | .07   |
| 10000 | 1.00 | .85 | .15 | 7225 | 2550 | 225 | .8500 | .1500 | 7225 | 2550 | 225 | 7225 | 2550 | 225 | 0    | .00   |
| 10000 | 1.01 | .85 | .15 | 7225 | 2550 | 225 | .8491 | .1509 | 7228 | 2569 | 228 | 7225 | 2576 | 225 | -26  | .06   |
| 10000 | 1.02 | .85 | .15 | 7225 | 2550 | 225 | .8482 | .1518 | 7232 | 2588 | 232 | 7225 | 2601 | 225 | -51  | .26   |
| 10000 | 1.03 | .85 | .15 | 7225 | 2550 | 225 | .8473 | .1527 | 7235 | 2607 | 235 | 7225 | 2627 | 225 | -77  | .57   |

|       |      |     |     |      |      |     |       |       |      |      |     |      |      |     |      |       |
|-------|------|-----|-----|------|------|-----|-------|-------|------|------|-----|------|------|-----|------|-------|
| 10000 | 1.04 | .85 | .15 | 7225 | 2550 | 225 | .8465 | .1535 | 7238 | 2626 | 238 | 7225 | 2652 | 225 | -102 | 1.01  |
| 10000 | 1.05 | .85 | .15 | 7225 | 2550 | 225 | .8456 | .1544 | 7241 | 2645 | 241 | 7225 | 2678 | 225 | -128 | 1.57  |
| 10000 | 1.06 | .85 | .15 | 7225 | 2550 | 225 | .8447 | .1553 | 7245 | 2663 | 245 | 7225 | 2703 | 225 | -153 | 2.24  |
| 10000 | 1.07 | .85 | .15 | 7225 | 2550 | 225 | .8439 | .1561 | 7248 | 2682 | 248 | 7225 | 2729 | 225 | -179 | 3.03  |
| 10000 | 1.08 | .85 | .15 | 7225 | 2550 | 225 | .8430 | .1570 | 7252 | 2701 | 252 | 7225 | 2754 | 225 | -204 | 3.93  |
| 10000 | 1.09 | .85 | .15 | 7225 | 2550 | 225 | .8421 | .1579 | 7255 | 2720 | 255 | 7225 | 2780 | 225 | -230 | 4.94  |
| 10000 | 1.10 | .85 | .15 | 7225 | 2550 | 225 | .8413 | .1587 | 7258 | 2738 | 258 | 7225 | 2805 | 225 | -255 | 6.06  |
| 10000 | 1.11 | .85 | .15 | 7225 | 2550 | 225 | .8405 | .1595 | 7262 | 2757 | 262 | 7225 | 2831 | 225 | -281 | 7.29  |
| 10000 | 1.12 | .85 | .15 | 7225 | 2550 | 225 | .8396 | .1604 | 7265 | 2776 | 265 | 7225 | 2856 | 225 | -306 | 8.62  |
| 10000 | 1.13 | .85 | .15 | 7225 | 2550 | 225 | .8388 | .1612 | 7269 | 2794 | 269 | 7225 | 2882 | 225 | -332 | 10.05 |
| 10000 | 1.14 | .85 | .15 | 7225 | 2550 | 225 | .8379 | .1621 | 7272 | 2813 | 272 | 7225 | 2907 | 225 | -357 | 11.58 |
| 10000 | 1.15 | .85 | .15 | 7225 | 2550 | 225 | .8371 | .1629 | 7275 | 2832 | 275 | 7225 | 2933 | 225 | -383 | 13.21 |
| 10000 | 1.16 | .85 | .15 | 7225 | 2550 | 225 | .8363 | .1637 | 7279 | 2850 | 279 | 7225 | 2958 | 225 | -408 | 14.93 |
| 10000 | 1.17 | .85 | .15 | 7225 | 2550 | 225 | .8355 | .1645 | 7282 | 2869 | 282 | 7225 | 2984 | 225 | -434 | 16.76 |
| 10000 | 1.18 | .85 | .15 | 7225 | 2550 | 225 | .8346 | .1654 | 7286 | 2887 | 286 | 7225 | 3009 | 225 | -459 | 18.67 |
| 10000 | 1.19 | .85 | .15 | 7225 | 2550 | 225 | .8338 | .1662 | 7290 | 2905 | 290 | 7225 | 3035 | 225 | -485 | 20.68 |
| 10000 | 1.20 | .85 | .15 | 7225 | 2550 | 225 | .8330 | .1670 | 7293 | 2924 | 293 | 7225 | 3060 | 225 | -510 | 22.78 |
| 10000 | .80  | .90 | .10 | 8100 | 1800 | 100 | .9149 | .0851 | 8070 | 1500 | 70  | 8100 | 1440 | 100 | 360  | 15.67 |
| 10000 | .81  | .90 | .10 | 8100 | 1800 | 100 | .9142 | .0858 | 8071 | 1516 | 71  | 8100 | 1458 | 100 | 342  | 13.99 |
| 10000 | .82  | .90 | .10 | 8100 | 1800 | 100 | .9134 | .0866 | 8073 | 1531 | 73  | 8100 | 1476 | 100 | 324  | 12.42 |
| 10000 | .83  | .90 | .10 | 8100 | 1800 | 100 | .9126 | .0874 | 8074 | 1546 | 74  | 8100 | 1494 | 100 | 306  | 10.96 |
| 10000 | .84  | .90 | .10 | 8100 | 1800 | 100 | .9119 | .0881 | 8075 | 1561 | 75  | 8100 | 1512 | 100 | 288  | 9.61  |
| 10000 | .85  | .90 | .10 | 8100 | 1800 | 100 | .9111 | .0889 | 8077 | 1576 | 77  | 8100 | 1530 | 100 | 270  | 8.36  |
| 10000 | .86  | .90 | .10 | 8100 | 1800 | 100 | .9103 | .0897 | 8078 | 1591 | 78  | 8100 | 1548 | 100 | 252  | 7.21  |
| 10000 | .87  | .90 | .10 | 8100 | 1800 | 100 | .9096 | .0904 | 8080 | 1606 | 80  | 8100 | 1566 | 100 | 234  | 6.15  |
| 10000 | .88  | .90 | .10 | 8100 | 1800 | 100 | .9088 | .0912 | 8081 | 1621 | 81  | 8100 | 1584 | 100 | 216  | 5.19  |
| 10000 | .89  | .90 | .10 | 8100 | 1800 | 100 | .9081 | .0919 | 8083 | 1636 | 83  | 8100 | 1602 | 100 | 198  | 4.32  |
| 10000 | .90  | .90 | .10 | 8100 | 1800 | 100 | .9073 | .0927 | 8084 | 1651 | 84  | 8100 | 1620 | 100 | 180  | 3.54  |
| 10000 | .91  | .90 | .10 | 8100 | 1800 | 100 | .9066 | .0934 | 8086 | 1666 | 86  | 8100 | 1638 | 100 | 162  | 2.84  |
| 10000 | .92  | .90 | .10 | 8100 | 1800 | 100 | .9058 | .0942 | 8087 | 1681 | 87  | 8100 | 1656 | 100 | 144  | 2.22  |
| 10000 | .93  | .90 | .10 | 8100 | 1800 | 100 | .9051 | .0949 | 8089 | 1696 | 89  | 8100 | 1674 | 100 | 126  | 1.69  |
| 10000 | .94  | .90 | .10 | 8100 | 1800 | 100 | .9044 | .0956 | 8090 | 1711 | 90  | 8100 | 1692 | 100 | 108  | 1.23  |
| 10000 | .95  | .90 | .10 | 8100 | 1800 | 100 | .9036 | .0964 | 8092 | 1726 | 92  | 8100 | 1710 | 100 | 90   | .85   |



|       |      |     |     |      |      |     |       |       |      |      |     |      |      |     |      |       |
|-------|------|-----|-----|------|------|-----|-------|-------|------|------|-----|------|------|-----|------|-------|
| 10000 | .96  | .90 | .10 | 8100 | 1800 | 100 | .9029 | .0971 | 8094 | 1741 | 94  | 8100 | 1728 | 100 | 72   | .54   |
| 10000 | .97  | .90 | .10 | 8100 | 1800 | 100 | .9022 | .0978 | 8095 | 1756 | 95  | 8100 | 1746 | 100 | 54   | .30   |
| 10000 | .98  | .90 | .10 | 8100 | 1800 | 100 | .9014 | .0986 | 8097 | 1770 | 97  | 8100 | 1764 | 100 | 36   | .13   |
| 10000 | .99  | .90 | .10 | 8100 | 1800 | 100 | .9007 | .0993 | 8098 | 1785 | 98  | 8100 | 1782 | 100 | 18   | .03   |
| 10000 | 1.00 | .90 | .10 | 8100 | 1800 | 100 | .9000 | .1000 | 8100 | 1800 | 100 | 8100 | 1800 | 100 | 0    | .00   |
| 10000 | 1.01 | .90 | .10 | 8100 | 1800 | 100 | .8993 | .1007 | 8102 | 1815 | 102 | 8100 | 1818 | 100 | -18  | .03   |
| 10000 | 1.02 | .90 | .10 | 8100 | 1800 | 100 | .8986 | .1014 | 8103 | 1829 | 103 | 8100 | 1836 | 100 | -36  | .13   |
| 10000 | 1.03 | .90 | .10 | 8100 | 1800 | 100 | .8979 | .1021 | 8105 | 1844 | 105 | 8100 | 1854 | 100 | -54  | .28   |
| 10000 | 1.04 | .90 | .10 | 8100 | 1800 | 100 | .8971 | .1029 | 8107 | 1859 | 107 | 8100 | 1872 | 100 | -72  | .50   |
| 10000 | 1.05 | .90 | .10 | 8100 | 1800 | 100 | .8964 | .1036 | 8108 | 1874 | 108 | 8100 | 1890 | 100 | -90  | .78   |
| 10000 | 1.06 | .90 | .10 | 8100 | 1800 | 100 | .8957 | .1043 | 8110 | 1888 | 110 | 8100 | 1908 | 100 | -108 | 1.11  |
| 10000 | 1.07 | .90 | .10 | 8100 | 1800 | 100 | .8950 | .1050 | 8112 | 1903 | 112 | 8100 | 1926 | 100 | -126 | 1.50  |
| 10000 | 1.08 | .90 | .10 | 8100 | 1800 | 100 | .8943 | .1057 | 8113 | 1917 | 113 | 8100 | 1944 | 100 | -144 | 1.95  |
| 10000 | 1.09 | .90 | .10 | 8100 | 1800 | 100 | .8936 | .1064 | 8115 | 1932 | 115 | 8100 | 1962 | 100 | -162 | 2.45  |
| 10000 | 1.10 | .90 | .10 | 8100 | 1800 | 100 | .8929 | .1071 | 8117 | 1947 | 117 | 8100 | 1980 | 100 | -180 | 3.00  |
| 10000 | 1.11 | .90 | .10 | 8100 | 1800 | 100 | .8922 | .1078 | 8118 | 1961 | 118 | 8100 | 1998 | 100 | -198 | 3.60  |
| 10000 | 1.12 | .90 | .10 | 8100 | 1800 | 100 | .8915 | .1085 | 8120 | 1976 | 120 | 8100 | 2016 | 100 | -216 | 4.26  |
| 10000 | 1.13 | .90 | .10 | 8100 | 1800 | 100 | .8909 | .1091 | 8122 | 1990 | 122 | 8100 | 2034 | 100 | -234 | 4.96  |
| 10000 | 1.14 | .90 | .10 | 8100 | 1800 | 100 | .8902 | .1098 | 8124 | 2005 | 124 | 8100 | 2052 | 100 | -252 | 5.72  |
| 10000 | 1.15 | .90 | .10 | 8100 | 1800 | 100 | .8895 | .1105 | 8125 | 2019 | 125 | 8100 | 2070 | 100 | -270 | 6.52  |
| 10000 | 1.16 | .90 | .10 | 8100 | 1800 | 100 | .8888 | .1112 | 8127 | 2034 | 127 | 8100 | 2088 | 100 | -288 | 7.37  |
| 10000 | 1.17 | .90 | .10 | 8100 | 1800 | 100 | .8881 | .1119 | 8129 | 2048 | 129 | 8100 | 2106 | 100 | -306 | 8.26  |
| 10000 | 1.18 | .90 | .10 | 8100 | 1800 | 100 | .8874 | .1126 | 8131 | 2062 | 131 | 8100 | 2124 | 100 | -324 | 9.20  |
| 10000 | 1.19 | .90 | .10 | 8100 | 1800 | 100 | .8868 | .1132 | 8133 | 2077 | 133 | 8100 | 2142 | 100 | -342 | 10.19 |
| 10000 | 1.20 | .90 | .10 | 8100 | 1800 | 100 | .8861 | .1139 | 8134 | 2091 | 134 | 8100 | 2160 | 100 | -360 | 11.21 |
| 10000 | .80  | .95 | .05 | 9025 | 950  | 25  | .9587 | .0413 | 9017 | 777  | 17  | 9025 | 760  | 25  | 190  | 4.46  |
| 10000 | .81  | .95 | .05 | 9025 | 950  | 25  | .9583 | .0417 | 9017 | 785  | 17  | 9025 | 770  | 25  | 181  | 3.98  |
| 10000 | .82  | .95 | .05 | 9025 | 950  | 25  | .9578 | .0422 | 9017 | 794  | 17  | 9025 | 779  | 25  | 171  | 3.53  |
| 10000 | .83  | .95 | .05 | 9025 | 950  | 25  | .9574 | .0426 | 9018 | 803  | 18  | 9025 | 789  | 25  | 162  | 3.11  |
| 10000 | .84  | .95 | .05 | 9025 | 950  | 25  | .9569 | .0431 | 9018 | 811  | 18  | 9025 | 798  | 25  | 152  | 2.72  |
| 10000 | .85  | .95 | .05 | 9025 | 950  | 25  | .9565 | .0435 | 9019 | 820  | 19  | 9025 | 808  | 25  | 143  | 2.36  |
| 10000 | .86  | .95 | .05 | 9025 | 950  | 25  | .9561 | .0439 | 9019 | 829  | 19  | 9025 | 817  | 25  | 133  | 2.04  |
| 10000 | .87  | .95 | .05 | 9025 | 950  | 25  | .9556 | .0444 | 9019 | 838  | 19  | 9025 | 827  | 25  | 124  | 1.74  |

|       |      |     |     |      |     |    |       |       |      |      |    |      |      |    |      |      |
|-------|------|-----|-----|------|-----|----|-------|-------|------|------|----|------|------|----|------|------|
| 10000 | .88  | .95 | .05 | 9025 | 950 | 25 | .9552 | .0448 | 9020 | 846  | 20 | 9025 | 836  | 25 | 114  | 1.46 |
| 10000 | .89  | .95 | .05 | 9025 | 950 | 25 | .9548 | .0452 | 9020 | 855  | 20 | 9025 | 846  | 25 | 105  | 1.22 |
| 10000 | .90  | .95 | .05 | 9025 | 950 | 25 | .9543 | .0457 | 9021 | 864  | 21 | 9025 | 855  | 25 | 95   | .99  |
| 10000 | .91  | .95 | .05 | 9025 | 950 | 25 | .9539 | .0461 | 9021 | 872  | 21 | 9025 | 865  | 25 | 86   | .80  |
| 10000 | .92  | .95 | .05 | 9025 | 950 | 25 | .9534 | .0466 | 9022 | 881  | 22 | 9025 | 874  | 25 | 76   | .62  |
| 10000 | .93  | .95 | .05 | 9025 | 950 | 25 | .9530 | .0470 | 9022 | 890  | 22 | 9025 | 884  | 25 | 67   | .47  |
| 10000 | .94  | .95 | .05 | 9025 | 950 | 25 | .9526 | .0474 | 9022 | 898  | 22 | 9025 | 893  | 25 | 57   | .34  |
| 10000 | .95  | .95 | .05 | 9025 | 950 | 25 | .9521 | .0479 | 9023 | 907  | 23 | 9025 | 903  | 25 | 48   | .24  |
| 10000 | .96  | .95 | .05 | 9025 | 950 | 25 | .9517 | .0483 | 9023 | 916  | 23 | 9025 | 912  | 25 | 38   | .15  |
| 10000 | .97  | .95 | .05 | 9025 | 950 | 25 | .9513 | .0487 | 9024 | 924  | 24 | 9025 | 922  | 25 | 29   | .08  |
| 10000 | .98  | .95 | .05 | 9025 | 950 | 25 | .9509 | .0491 | 9024 | 933  | 24 | 9025 | 931  | 25 | 19   | .04  |
| 10000 | .99  | .95 | .05 | 9025 | 950 | 25 | .9504 | .0496 | 9025 | 941  | 25 | 9025 | 941  | 25 | 10   | .01  |
| 10000 | 1.00 | .95 | .05 | 9025 | 950 | 25 | .9500 | .0500 | 9025 | 950  | 25 | 9025 | 950  | 25 | 0    | .00  |
| 10000 | 1.01 | .95 | .05 | 9025 | 950 | 25 | .9496 | .0504 | 9025 | 959  | 25 | 9025 | 960  | 25 | -10  | .01  |
| 10000 | 1.02 | .95 | .05 | 9025 | 950 | 25 | .9491 | .0509 | 9026 | 967  | 26 | 9025 | 969  | 25 | -19  | .04  |
| 10000 | 1.03 | .95 | .05 | 9025 | 950 | 25 | .9487 | .0513 | 9026 | 976  | 26 | 9025 | 979  | 25 | -29  | .08  |
| 10000 | 1.04 | .95 | .05 | 9025 | 950 | 25 | .9483 | .0517 | 9027 | 984  | 27 | 9025 | 988  | 25 | -38  | .14  |
| 10000 | 1.05 | .95 | .05 | 9025 | 950 | 25 | .9479 | .0521 | 9027 | 993  | 27 | 9025 | 998  | 25 | -48  | .22  |
| 10000 | 1.06 | .95 | .05 | 9025 | 950 | 25 | .9474 | .0526 | 9028 | 1001 | 28 | 9025 | 1007 | 25 | -57  | .31  |
| 10000 | 1.07 | .95 | .05 | 9025 | 950 | 25 | .9470 | .0530 | 9028 | 1010 | 28 | 9025 | 1017 | 25 | -67  | .42  |
| 10000 | 1.08 | .95 | .05 | 9025 | 950 | 25 | .9466 | .0534 | 9029 | 1019 | 29 | 9025 | 1026 | 25 | -76  | .54  |
| 10000 | 1.09 | .95 | .05 | 9025 | 950 | 25 | .9462 | .0538 | 9029 | 1027 | 29 | 9025 | 1036 | 25 | -86  | .68  |
| 10000 | 1.10 | .95 | .05 | 9025 | 950 | 25 | .9458 | .0542 | 9030 | 1036 | 30 | 9025 | 1045 | 25 | -95  | .83  |
| 10000 | 1.11 | .95 | .05 | 9025 | 950 | 25 | .9453 | .0547 | 9030 | 1044 | 30 | 9025 | 1055 | 25 | -105 | 1.00 |
| 10000 | 1.12 | .95 | .05 | 9025 | 950 | 25 | .9449 | .0551 | 9031 | 1053 | 31 | 9025 | 1064 | 25 | -114 | 1.18 |
| 10000 | 1.13 | .95 | .05 | 9025 | 950 | 25 | .9445 | .0555 | 9031 | 1061 | 31 | 9025 | 1074 | 25 | -124 | 1.37 |
| 10000 | 1.14 | .95 | .05 | 9025 | 950 | 25 | .9441 | .0559 | 9032 | 1070 | 32 | 9025 | 1083 | 25 | -133 | 1.58 |
| 10000 | 1.15 | .95 | .05 | 9025 | 950 | 25 | .9437 | .0563 | 9032 | 1078 | 32 | 9025 | 1093 | 25 | -143 | 1.80 |
| 10000 | 1.16 | .95 | .05 | 9025 | 950 | 25 | .9433 | .0567 | 9033 | 1087 | 33 | 9025 | 1102 | 25 | -152 | 2.03 |
| 10000 | 1.17 | .95 | .05 | 9025 | 950 | 25 | .9428 | .0572 | 9033 | 1095 | 33 | 9025 | 1112 | 25 | -162 | 2.27 |
| 10000 | 1.18 | .95 | .05 | 9025 | 950 | 25 | .9424 | .0576 | 9034 | 1104 | 34 | 9025 | 1121 | 25 | -171 | 2.53 |
| 10000 | 1.19 | .95 | .05 | 9025 | 950 | 25 | .9420 | .0580 | 9034 | 1112 | 34 | 9025 | 1131 | 25 | -181 | 2.80 |
| 10000 | 1.20 | .95 | .05 | 9025 | 950 | 25 | .9416 | .0584 | 9035 | 1121 | 35 | 9025 | 1140 | 25 | -190 | 3.08 |

|       |     |      |     |       |   |   |            |       |       |   |   |       |   |   |   |      |
|-------|-----|------|-----|-------|---|---|------------|-------|-------|---|---|-------|---|---|---|------|
| 10000 | .80 | 1.00 | .00 | 10000 | 0 | 0 | 1.000<br>0 | .0000 | 10000 | 0 | 0 | 10000 | 0 | 0 | 0 | 3.08 |
| 10000 | .81 | 1.00 | .00 | 10000 | 0 | 0 | 1.000<br>0 | .0000 | 10000 | 0 | 0 | 10000 | 0 | 0 | 0 | 3.08 |
| 10000 | .82 | 1.00 | .00 | 10000 | 0 | 0 | 1.000<br>0 | .0000 | 10000 | 0 | 0 | 10000 | 0 | 0 | 0 | 3.08 |
| 10000 | .83 | 1.00 | .00 | 10000 | 0 | 0 | 1.000<br>0 | .0000 | 10000 | 0 | 0 | 10000 | 0 | 0 | 0 | 3.08 |
| 10000 | .84 | 1.00 | .00 | 10000 | 0 | 0 | 1.000<br>0 | .0000 | 10000 | 0 | 0 | 10000 | 0 | 0 | 0 | 3.08 |
| 10000 | .85 | 1.00 | .00 | 10000 | 0 | 0 | 1.000<br>0 | .0000 | 10000 | 0 | 0 | 10000 | 0 | 0 | 0 | 3.08 |
| 10000 | .86 | 1.00 | .00 | 10000 | 0 | 0 | 1.000<br>0 | .0000 | 10000 | 0 | 0 | 10000 | 0 | 0 | 0 | 3.08 |
| 10000 | .87 | 1.00 | .00 | 10000 | 0 | 0 | 1.000<br>0 | .0000 | 10000 | 0 | 0 | 10000 | 0 | 0 | 0 | 3.08 |
| 10000 | .88 | 1.00 | .00 | 10000 | 0 | 0 | 1.000<br>0 | .0000 | 10000 | 0 | 0 | 10000 | 0 | 0 | 0 | 3.08 |
| 10000 | .89 | 1.00 | .00 | 10000 | 0 | 0 | 1.000<br>0 | .0000 | 10000 | 0 | 0 | 10000 | 0 | 0 | 0 | 3.08 |
| 10000 | .90 | 1.00 | .00 | 10000 | 0 | 0 | 1.000<br>0 | .0000 | 10000 | 0 | 0 | 10000 | 0 | 0 | 0 | 3.08 |
| 10000 | .91 | 1.00 | .00 | 10000 | 0 | 0 | 1.000<br>0 | .0000 | 10000 | 0 | 0 | 10000 | 0 | 0 | 0 | 3.08 |
| 10000 | .92 | 1.00 | .00 | 10000 | 0 | 0 | 1.000<br>0 | .0000 | 10000 | 0 | 0 | 10000 | 0 | 0 | 0 | 3.08 |
| 10000 | .93 | 1.00 | .00 | 10000 | 0 | 0 | 1.000<br>0 | .0000 | 10000 | 0 | 0 | 10000 | 0 | 0 | 0 | 3.08 |
| 10000 | .94 | 1.00 | .00 | 10000 | 0 | 0 | 1.000<br>0 | .0000 | 10000 | 0 | 0 | 10000 | 0 | 0 | 0 | 3.08 |
| 10000 | .95 | 1.00 | .00 | 10000 | 0 | 0 | 1.000<br>0 | .0000 | 10000 | 0 | 0 | 10000 | 0 | 0 | 0 | 3.08 |
| 10000 | .96 | 1.00 | .00 | 10000 | 0 | 0 | 1.000<br>0 | .0000 | 10000 | 0 | 0 | 10000 | 0 | 0 | 0 | 3.08 |

|       |      |      |     |       |   |   |            |       |       |   |   |       |   |   |   |      |
|-------|------|------|-----|-------|---|---|------------|-------|-------|---|---|-------|---|---|---|------|
| 10000 | .97  | 1.00 | .00 | 10000 | 0 | 0 | 1.000<br>0 | .0000 | 10000 | 0 | 0 | 10000 | 0 | 0 | 0 | 3.08 |
| 10000 | .98  | 1.00 | .00 | 10000 | 0 | 0 | 1.000<br>0 | .0000 | 10000 | 0 | 0 | 10000 | 0 | 0 | 0 | 3.08 |
| 10000 | .99  | 1.00 | .00 | 10000 | 0 | 0 | 1.000<br>0 | .0000 | 10000 | 0 | 0 | 10000 | 0 | 0 | 0 | 3.08 |
| 10000 | 1.00 | 1.00 | .00 | 10000 | 0 | 0 | 1.000<br>0 | .0000 | 10000 | 0 | 0 | 10000 | 0 | 0 | 0 | 3.08 |
| 10000 | 1.01 | 1.00 | .00 | 10000 | 0 | 0 | 1.000<br>0 | .0000 | 10000 | 0 | 0 | 10000 | 0 | 0 | 0 | 3.08 |
| 10000 | 1.02 | 1.00 | .00 | 10000 | 0 | 0 | 1.000<br>0 | .0000 | 10000 | 0 | 0 | 10000 | 0 | 0 | 0 | 3.08 |
| 10000 | 1.03 | 1.00 | .00 | 10000 | 0 | 0 | 1.000<br>0 | .0000 | 10000 | 0 | 0 | 10000 | 0 | 0 | 0 | 3.08 |
| 10000 | 1.04 | 1.00 | .00 | 10000 | 0 | 0 | 1.000<br>0 | .0000 | 10000 | 0 | 0 | 10000 | 0 | 0 | 0 | 3.08 |
| 10000 | 1.05 | 1.00 | .00 | 10000 | 0 | 0 | 1.000<br>0 | .0000 | 10000 | 0 | 0 | 10000 | 0 | 0 | 0 | 3.08 |
| 10000 | 1.06 | 1.00 | .00 | 10000 | 0 | 0 | 1.000<br>0 | .0000 | 10000 | 0 | 0 | 10000 | 0 | 0 | 0 | 3.08 |
| 10000 | 1.07 | 1.00 | .00 | 10000 | 0 | 0 | 1.000<br>0 | .0000 | 10000 | 0 | 0 | 10000 | 0 | 0 | 0 | 3.08 |
| 10000 | 1.08 | 1.00 | .00 | 10000 | 0 | 0 | 1.000<br>0 | .0000 | 10000 | 0 | 0 | 10000 | 0 | 0 | 0 | 3.08 |
| 10000 | 1.09 | 1.00 | .00 | 10000 | 0 | 0 | 1.000<br>0 | .0000 | 10000 | 0 | 0 | 10000 | 0 | 0 | 0 | 3.08 |
| 10000 | 1.10 | 1.00 | .00 | 10000 | 0 | 0 | 1.000<br>0 | .0000 | 10000 | 0 | 0 | 10000 | 0 | 0 | 0 | 3.08 |
| 10000 | 1.11 | 1.00 | .00 | 10000 | 0 | 0 | 1.000<br>0 | .0000 | 10000 | 0 | 0 | 10000 | 0 | 0 | 0 | 3.08 |
| 10000 | 1.12 | 1.00 | .00 | 10000 | 0 | 0 | 1.000<br>0 | .0000 | 10000 | 0 | 0 | 10000 | 0 | 0 | 0 | 3.08 |
| 10000 | 1.13 | 1.00 | .00 | 10000 | 0 | 0 | 1.000<br>0 | .0000 | 10000 | 0 | 0 | 10000 | 0 | 0 | 0 | 3.08 |

|       |      |      |     |       |      |       |            |       |       |      |       |       |      |       |     |      |
|-------|------|------|-----|-------|------|-------|------------|-------|-------|------|-------|-------|------|-------|-----|------|
| 10000 | 1.14 | 1.00 | .00 | 10000 | 0    | 0     | 1.000<br>0 | .0000 | 10000 | 0    | 0     | 10000 | 0    | 0     | 0   | 3.08 |
| 10000 | 1.15 | 1.00 | .00 | 10000 | 0    | 0     | 1.000<br>0 | .0000 | 10000 | 0    | 0     | 10000 | 0    | 0     | 0   | 3.08 |
| 10000 | 1.16 | 1.00 | .00 | 10000 | 0    | 0     | 1.000<br>0 | .0000 | 10000 | 0    | 0     | 10000 | 0    | 0     | 0   | 3.08 |
| 10000 | 1.17 | 1.00 | .00 | 10000 | 0    | 0     | 1.000<br>0 | .0000 | 10000 | 0    | 0     | 10000 | 0    | 0     | 0   | 3.08 |
| 10000 | 1.18 | 1.00 | .00 | 10000 | 0    | 0     | 1.000<br>0 | .0000 | 10000 | 0    | 0     | 10000 | 0    | 0     | 0   | 3.08 |
| 10000 | 1.19 | 1.00 | .00 | 10000 | 0    | 0     | 1.000<br>0 | .0000 | 10000 | 0    | 0     | 10000 | 0    | 0     | 0   | 3.08 |
| 10000 | 1.20 | 1.00 | .00 | 10000 | 0    | 0     | 1.000<br>0 | .0000 | 10000 | 0    | 0     | 10000 | 0    | 0     | 0   | 3.08 |
| 20000 | .80  | .05  | .95 | 50    | 1900 | 18050 | .0413      | .9587 | 33    | 1553 | 18033 | 50    | 1520 | 18050 | 380 | 8.92 |
| 20000 | .81  | .05  | .95 | 50    | 1900 | 18050 | .0417      | .9583 | 34    | 1571 | 18034 | 50    | 1539 | 18050 | 361 | 7.95 |
| 20000 | .82  | .05  | .95 | 50    | 1900 | 18050 | .0422      | .9578 | 35    | 1588 | 18035 | 50    | 1558 | 18050 | 342 | 7.05 |
| 20000 | .83  | .05  | .95 | 50    | 1900 | 18050 | .0426      | .9574 | 36    | 1606 | 18036 | 50    | 1577 | 18050 | 323 | 6.22 |
| 20000 | .84  | .05  | .95 | 50    | 1900 | 18050 | .0431      | .9569 | 37    | 1623 | 18037 | 50    | 1596 | 18050 | 304 | 5.44 |
| 20000 | .85  | .05  | .95 | 50    | 1900 | 18050 | .0435      | .9565 | 37    | 1640 | 18037 | 50    | 1615 | 18050 | 285 | 4.73 |
| 20000 | .86  | .05  | .95 | 50    | 1900 | 18050 | .0439      | .9561 | 38    | 1658 | 18038 | 50    | 1634 | 18050 | 266 | 4.07 |
| 20000 | .87  | .05  | .95 | 50    | 1900 | 18050 | .0444      | .9556 | 39    | 1675 | 18039 | 50    | 1653 | 18050 | 247 | 3.47 |
| 20000 | .88  | .05  | .95 | 50    | 1900 | 18050 | .0448      | .9552 | 40    | 1693 | 18040 | 50    | 1672 | 18050 | 228 | 2.93 |
| 20000 | .89  | .05  | .95 | 50    | 1900 | 18050 | .0452      | .9548 | 41    | 1710 | 18041 | 50    | 1691 | 18050 | 209 | 2.43 |
| 20000 | .90  | .05  | .95 | 50    | 1900 | 18050 | .0457      | .9543 | 41    | 1727 | 18041 | 50    | 1710 | 18050 | 190 | 1.99 |
| 20000 | .91  | .05  | .95 | 50    | 1900 | 18050 | .0461      | .9539 | 42    | 1745 | 18042 | 50    | 1729 | 18050 | 171 | 1.60 |
| 20000 | .92  | .05  | .95 | 50    | 1900 | 18050 | .0466      | .9534 | 43    | 1762 | 18043 | 50    | 1748 | 18050 | 152 | 1.25 |
| 20000 | .93  | .05  | .95 | 50    | 1900 | 18050 | .0470      | .9530 | 44    | 1779 | 18044 | 50    | 1767 | 18050 | 133 | .95  |
| 20000 | .94  | .05  | .95 | 50    | 1900 | 18050 | .0474      | .9526 | 45    | 1797 | 18045 | 50    | 1786 | 18050 | 114 | .69  |
| 20000 | .95  | .05  | .95 | 50    | 1900 | 18050 | .0479      | .9521 | 46    | 1814 | 18046 | 50    | 1805 | 18050 | 95  | .47  |
| 20000 | .96  | .05  | .95 | 50    | 1900 | 18050 | .0483      | .9517 | 46    | 1831 | 18046 | 50    | 1824 | 18050 | 76  | .30  |
| 20000 | .97  | .05  | .95 | 50    | 1900 | 18050 | .0487      | .9513 | 47    | 1848 | 18047 | 50    | 1843 | 18050 | 57  | .17  |
| 20000 | .98  | .05  | .95 | 50    | 1900 | 18050 | .0491      | .9509 | 48    | 1866 | 18048 | 50    | 1862 | 18050 | 38  | .07  |

|       |      |     |     |     |      |       |       |       |     |      |       |     |      |       |      |       |
|-------|------|-----|-----|-----|------|-------|-------|-------|-----|------|-------|-----|------|-------|------|-------|
| 20000 | .99  | .05 | .95 | 50  | 1900 | 18050 | .0496 | .9504 | 49  | 1883 | 18049 | 50  | 1881 | 18050 | 19   | .02   |
| 20000 | 1.00 | .05 | .95 | 50  | 1900 | 18050 | .0500 | .9500 | 50  | 1900 | 18050 | 50  | 1900 | 18050 | 0    | .00   |
| 20000 | 1.01 | .05 | .95 | 50  | 1900 | 18050 | .0504 | .9496 | 51  | 1917 | 18051 | 50  | 1919 | 18050 | -19  | .02   |
| 20000 | 1.02 | .05 | .95 | 50  | 1900 | 18050 | .0509 | .9491 | 52  | 1934 | 18052 | 50  | 1938 | 18050 | -38  | .07   |
| 20000 | 1.03 | .05 | .95 | 50  | 1900 | 18050 | .0513 | .9487 | 53  | 1952 | 18053 | 50  | 1957 | 18050 | -57  | .16   |
| 20000 | 1.04 | .05 | .95 | 50  | 1900 | 18050 | .0517 | .9483 | 54  | 1969 | 18054 | 50  | 1976 | 18050 | -76  | .28   |
| 20000 | 1.05 | .05 | .95 | 50  | 1900 | 18050 | .0521 | .9479 | 55  | 1986 | 18055 | 50  | 1995 | 18050 | -95  | .43   |
| 20000 | 1.06 | .05 | .95 | 50  | 1900 | 18050 | .0526 | .9474 | 56  | 2003 | 18056 | 50  | 2014 | 18050 | -114 | .62   |
| 20000 | 1.07 | .05 | .95 | 50  | 1900 | 18050 | .0530 | .9470 | 56  | 2020 | 18056 | 50  | 2033 | 18050 | -133 | .83   |
| 20000 | 1.08 | .05 | .95 | 50  | 1900 | 18050 | .0534 | .9466 | 57  | 2037 | 18057 | 50  | 2052 | 18050 | -152 | 1.08  |
| 20000 | 1.09 | .05 | .95 | 50  | 1900 | 18050 | .0538 | .9462 | 58  | 2054 | 18058 | 50  | 2071 | 18050 | -171 | 1.35  |
| 20000 | 1.10 | .05 | .95 | 50  | 1900 | 18050 | .0542 | .9458 | 59  | 2071 | 18059 | 50  | 2090 | 18050 | -190 | 1.66  |
| 20000 | 1.11 | .05 | .95 | 50  | 1900 | 18050 | .0547 | .9453 | 60  | 2088 | 18060 | 50  | 2109 | 18050 | -209 | 1.99  |
| 20000 | 1.12 | .05 | .95 | 50  | 1900 | 18050 | .0551 | .9449 | 61  | 2105 | 18061 | 50  | 2128 | 18050 | -228 | 2.35  |
| 20000 | 1.13 | .05 | .95 | 50  | 1900 | 18050 | .0555 | .9445 | 62  | 2122 | 18062 | 50  | 2147 | 18050 | -247 | 2.74  |
| 20000 | 1.14 | .05 | .95 | 50  | 1900 | 18050 | .0559 | .9441 | 63  | 2139 | 18063 | 50  | 2166 | 18050 | -266 | 3.15  |
| 20000 | 1.15 | .05 | .95 | 50  | 1900 | 18050 | .0563 | .9437 | 64  | 2156 | 18064 | 50  | 2185 | 18050 | -285 | 3.59  |
| 20000 | 1.16 | .05 | .95 | 50  | 1900 | 18050 | .0567 | .9433 | 65  | 2173 | 18065 | 50  | 2204 | 18050 | -304 | 4.06  |
| 20000 | 1.17 | .05 | .95 | 50  | 1900 | 18050 | .0572 | .9428 | 66  | 2190 | 18066 | 50  | 2223 | 18050 | -323 | 4.55  |
| 20000 | 1.18 | .05 | .95 | 50  | 1900 | 18050 | .0576 | .9424 | 67  | 2207 | 18067 | 50  | 2242 | 18050 | -342 | 5.06  |
| 20000 | 1.19 | .05 | .95 | 50  | 1900 | 18050 | .0580 | .9420 | 68  | 2224 | 18068 | 50  | 2261 | 18050 | -361 | 5.60  |
| 20000 | 1.20 | .05 | .95 | 50  | 1900 | 18050 | .0584 | .9416 | 69  | 2241 | 18069 | 50  | 2280 | 18050 | -380 | 6.16  |
| 20000 | .80  | .10 | .90 | 200 | 3600 | 16200 | .0851 | .9149 | 140 | 3001 | 16140 | 200 | 2880 | 16200 | 720  | 31.34 |
| 20000 | .81  | .10 | .90 | 200 | 3600 | 16200 | .0858 | .9142 | 142 | 3031 | 16142 | 200 | 2916 | 16200 | 684  | 27.98 |
| 20000 | .82  | .10 | .90 | 200 | 3600 | 16200 | .0866 | .9134 | 145 | 3062 | 16145 | 200 | 2952 | 16200 | 648  | 24.84 |
| 20000 | .83  | .10 | .90 | 200 | 3600 | 16200 | .0874 | .9126 | 148 | 3092 | 16148 | 200 | 2988 | 16200 | 612  | 21.93 |
| 20000 | .84  | .10 | .90 | 200 | 3600 | 16200 | .0881 | .9119 | 151 | 3122 | 16151 | 200 | 3024 | 16200 | 576  | 19.22 |
| 20000 | .85  | .10 | .90 | 200 | 3600 | 16200 | .0889 | .9111 | 154 | 3152 | 16154 | 200 | 3060 | 16200 | 540  | 16.72 |
| 20000 | .86  | .10 | .90 | 200 | 3600 | 16200 | .0897 | .9103 | 157 | 3183 | 16157 | 200 | 3096 | 16200 | 504  | 14.42 |
| 20000 | .87  | .10 | .90 | 200 | 3600 | 16200 | .0904 | .9096 | 160 | 3213 | 16160 | 200 | 3132 | 16200 | 468  | 12.31 |
| 20000 | .88  | .10 | .90 | 200 | 3600 | 16200 | .0912 | .9088 | 163 | 3243 | 16163 | 200 | 3168 | 16200 | 432  | 10.39 |
| 20000 | .89  | .10 | .90 | 200 | 3600 | 16200 | .0919 | .9081 | 166 | 3273 | 16166 | 200 | 3204 | 16200 | 396  | 8.64  |
| 20000 | .90  | .10 | .90 | 200 | 3600 | 16200 | .0927 | .9073 | 169 | 3303 | 16169 | 200 | 3240 | 16200 | 360  | 7.08  |

|       |      |     |     |     |      |       |       |       |     |      |       |     |      |       |      |       |
|-------|------|-----|-----|-----|------|-------|-------|-------|-----|------|-------|-----|------|-------|------|-------|
| 20000 | .91  | .10 | .90 | 200 | 3600 | 16200 | .0934 | .9066 | 172 | 3333 | 16172 | 200 | 3276 | 16200 | 324  | 5.68  |
| 20000 | .92  | .10 | .90 | 200 | 3600 | 16200 | .0942 | .9058 | 175 | 3362 | 16175 | 200 | 3312 | 16200 | 288  | 4.45  |
| 20000 | .93  | .10 | .90 | 200 | 3600 | 16200 | .0949 | .9051 | 178 | 3392 | 16178 | 200 | 3348 | 16200 | 252  | 3.37  |
| 20000 | .94  | .10 | .90 | 200 | 3600 | 16200 | .0956 | .9044 | 181 | 3422 | 16181 | 200 | 3384 | 16200 | 216  | 2.46  |
| 20000 | .95  | .10 | .90 | 200 | 3600 | 16200 | .0964 | .9036 | 184 | 3452 | 16184 | 200 | 3420 | 16200 | 180  | 1.69  |
| 20000 | .96  | .10 | .90 | 200 | 3600 | 16200 | .0971 | .9029 | 187 | 3482 | 16187 | 200 | 3456 | 16200 | 144  | 1.07  |
| 20000 | .97  | .10 | .90 | 200 | 3600 | 16200 | .0978 | .9022 | 190 | 3511 | 16190 | 200 | 3492 | 16200 | 108  | .60   |
| 20000 | .98  | .10 | .90 | 200 | 3600 | 16200 | .0986 | .9014 | 194 | 3541 | 16194 | 200 | 3528 | 16200 | 72   | .26   |
| 20000 | .99  | .10 | .90 | 200 | 3600 | 16200 | .0993 | .9007 | 197 | 3570 | 16197 | 200 | 3564 | 16200 | 36   | .07   |
| 20000 | 1.00 | .10 | .90 | 200 | 3600 | 16200 | .1000 | .9000 | 200 | 3600 | 16200 | 200 | 3600 | 16200 | 0    | .00   |
| 20000 | 1.01 | .10 | .90 | 200 | 3600 | 16200 | .1007 | .8993 | 203 | 3629 | 16203 | 200 | 3636 | 16200 | -36  | .06   |
| 20000 | 1.02 | .10 | .90 | 200 | 3600 | 16200 | .1014 | .8986 | 207 | 3659 | 16207 | 200 | 3672 | 16200 | -72  | .26   |
| 20000 | 1.03 | .10 | .90 | 200 | 3600 | 16200 | .1021 | .8979 | 210 | 3688 | 16210 | 200 | 3708 | 16200 | -108 | .57   |
| 20000 | 1.04 | .10 | .90 | 200 | 3600 | 16200 | .1029 | .8971 | 213 | 3718 | 16213 | 200 | 3744 | 16200 | -144 | 1.00  |
| 20000 | 1.05 | .10 | .90 | 200 | 3600 | 16200 | .1036 | .8964 | 216 | 3747 | 16216 | 200 | 3780 | 16200 | -180 | 1.56  |
| 20000 | 1.06 | .10 | .90 | 200 | 3600 | 16200 | .1043 | .8957 | 220 | 3776 | 16220 | 200 | 3816 | 16200 | -216 | 2.23  |
| 20000 | 1.07 | .10 | .90 | 200 | 3600 | 16200 | .1050 | .8950 | 223 | 3806 | 16223 | 200 | 3852 | 16200 | -252 | 3.01  |
| 20000 | 1.08 | .10 | .90 | 200 | 3600 | 16200 | .1057 | .8943 | 227 | 3835 | 16227 | 200 | 3888 | 16200 | -288 | 3.90  |
| 20000 | 1.09 | .10 | .90 | 200 | 3600 | 16200 | .1064 | .8936 | 230 | 3864 | 16230 | 200 | 3924 | 16200 | -324 | 4.90  |
| 20000 | 1.10 | .10 | .90 | 200 | 3600 | 16200 | .1071 | .8929 | 233 | 3893 | 16233 | 200 | 3960 | 16200 | -360 | 6.00  |
| 20000 | 1.11 | .10 | .90 | 200 | 3600 | 16200 | .1078 | .8922 | 237 | 3922 | 16237 | 200 | 3996 | 16200 | -396 | 7.21  |
| 20000 | 1.12 | .10 | .90 | 200 | 3600 | 16200 | .1085 | .8915 | 240 | 3951 | 16240 | 200 | 4032 | 16200 | -432 | 8.52  |
| 20000 | 1.13 | .10 | .90 | 200 | 3600 | 16200 | .1091 | .8909 | 244 | 3980 | 16244 | 200 | 4068 | 16200 | -468 | 9.93  |
| 20000 | 1.14 | .10 | .90 | 200 | 3600 | 16200 | .1098 | .8902 | 247 | 4009 | 16247 | 200 | 4104 | 16200 | -504 | 11.44 |
| 20000 | 1.15 | .10 | .90 | 200 | 3600 | 16200 | .1105 | .8895 | 251 | 4038 | 16251 | 200 | 4140 | 16200 | -540 | 13.04 |
| 20000 | 1.16 | .10 | .90 | 200 | 3600 | 16200 | .1112 | .8888 | 254 | 4067 | 16254 | 200 | 4176 | 16200 | -576 | 14.74 |
| 20000 | 1.17 | .10 | .90 | 200 | 3600 | 16200 | .1119 | .8881 | 258 | 4096 | 16258 | 200 | 4212 | 16200 | -612 | 16.52 |
| 20000 | 1.18 | .10 | .90 | 200 | 3600 | 16200 | .1126 | .8874 | 262 | 4125 | 16262 | 200 | 4248 | 16200 | -648 | 18.40 |
| 20000 | 1.19 | .10 | .90 | 200 | 3600 | 16200 | .1132 | .8868 | 265 | 4154 | 16265 | 200 | 4284 | 16200 | -684 | 20.37 |
| 20000 | 1.20 | .10 | .90 | 200 | 3600 | 16200 | .1139 | .8861 | 269 | 4182 | 16269 | 200 | 4320 | 16200 | -720 | 22.43 |
| 20000 | .80  | .15 | .85 | 450 | 5100 | 14450 | .1312 | .8688 | 327 | 4327 | 14327 | 450 | 4080 | 14450 | 1020 | 61.69 |
| 20000 | .81  | .15 | .85 | 450 | 5100 | 14450 | .1322 | .8678 | 332 | 4366 | 14332 | 450 | 4131 | 14450 | 969  | 55.14 |
| 20000 | .82  | .15 | .85 | 450 | 5100 | 14450 | .1332 | .8668 | 338 | 4405 | 14338 | 450 | 4182 | 14450 | 918  | 49.02 |

|       |      |     |     |     |      |       |       |       |     |      |       |     |      |       |      |       |
|-------|------|-----|-----|-----|------|-------|-------|-------|-----|------|-------|-----|------|-------|------|-------|
| 20000 | .83  | .15 | .85 | 450 | 5100 | 14450 | .1341 | .8659 | 344 | 4444 | 14344 | 450 | 4233 | 14450 | 867  | 43.31 |
| 20000 | .84  | .15 | .85 | 450 | 5100 | 14450 | .1351 | .8649 | 350 | 4484 | 14350 | 450 | 4284 | 14450 | 816  | 38.01 |
| 20000 | .85  | .15 | .85 | 450 | 5100 | 14450 | .1361 | .8639 | 356 | 4523 | 14356 | 450 | 4335 | 14450 | 765  | 33.10 |
| 20000 | .86  | .15 | .85 | 450 | 5100 | 14450 | .1370 | .8630 | 362 | 4562 | 14362 | 450 | 4386 | 14450 | 714  | 28.58 |
| 20000 | .87  | .15 | .85 | 450 | 5100 | 14450 | .1380 | .8620 | 368 | 4600 | 14368 | 450 | 4437 | 14450 | 663  | 24.42 |
| 20000 | .88  | .15 | .85 | 450 | 5100 | 14450 | .1390 | .8610 | 374 | 4639 | 14374 | 450 | 4488 | 14450 | 612  | 20.63 |
| 20000 | .89  | .15 | .85 | 450 | 5100 | 14450 | .1399 | .8601 | 380 | 4678 | 14380 | 450 | 4539 | 14450 | 561  | 17.18 |
| 20000 | .90  | .15 | .85 | 450 | 5100 | 14450 | .1408 | .8592 | 387 | 4717 | 14387 | 450 | 4590 | 14450 | 510  | 14.08 |
| 20000 | .91  | .15 | .85 | 450 | 5100 | 14450 | .1418 | .8582 | 393 | 4755 | 14393 | 450 | 4641 | 14450 | 459  | 11.31 |
| 20000 | .92  | .15 | .85 | 450 | 5100 | 14450 | .1427 | .8573 | 399 | 4794 | 14399 | 450 | 4692 | 14450 | 408  | 8.86  |
| 20000 | .93  | .15 | .85 | 450 | 5100 | 14450 | .1436 | .8564 | 405 | 4832 | 14405 | 450 | 4743 | 14450 | 357  | 6.73  |
| 20000 | .94  | .15 | .85 | 450 | 5100 | 14450 | .1446 | .8554 | 412 | 4871 | 14412 | 450 | 4794 | 14450 | 306  | 4.90  |
| 20000 | .95  | .15 | .85 | 450 | 5100 | 14450 | .1455 | .8545 | 418 | 4909 | 14418 | 450 | 4845 | 14450 | 255  | 3.38  |
| 20000 | .96  | .15 | .85 | 450 | 5100 | 14450 | .1464 | .8536 | 424 | 4948 | 14424 | 450 | 4896 | 14450 | 204  | 2.15  |
| 20000 | .97  | .15 | .85 | 450 | 5100 | 14450 | .1473 | .8527 | 431 | 4986 | 14431 | 450 | 4947 | 14450 | 153  | 1.20  |
| 20000 | .98  | .15 | .85 | 450 | 5100 | 14450 | .1482 | .8518 | 437 | 5024 | 14437 | 450 | 4998 | 14450 | 102  | .53   |
| 20000 | .99  | .15 | .85 | 450 | 5100 | 14450 | .1491 | .8509 | 444 | 5062 | 14444 | 450 | 5049 | 14450 | 51   | .13   |
| 20000 | 1.00 | .15 | .85 | 450 | 5100 | 14450 | .1500 | .8500 | 450 | 5100 | 14450 | 450 | 5100 | 14450 | 0    | .00   |
| 20000 | 1.01 | .15 | .85 | 450 | 5100 | 14450 | .1509 | .8491 | 457 | 5138 | 14457 | 450 | 5151 | 14450 | -51  | .13   |
| 20000 | 1.02 | .15 | .85 | 450 | 5100 | 14450 | .1518 | .8482 | 463 | 5176 | 14463 | 450 | 5202 | 14450 | -102 | .51   |
| 20000 | 1.03 | .15 | .85 | 450 | 5100 | 14450 | .1527 | .8473 | 470 | 5214 | 14470 | 450 | 5253 | 14450 | -153 | 1.15  |
| 20000 | 1.04 | .15 | .85 | 450 | 5100 | 14450 | .1535 | .8465 | 476 | 5251 | 14476 | 450 | 5304 | 14450 | -204 | 2.02  |
| 20000 | 1.05 | .15 | .85 | 450 | 5100 | 14450 | .1544 | .8456 | 483 | 5289 | 14483 | 450 | 5355 | 14450 | -255 | 3.14  |
| 20000 | 1.06 | .15 | .85 | 450 | 5100 | 14450 | .1553 | .8447 | 490 | 5327 | 14490 | 450 | 5406 | 14450 | -306 | 4.48  |
| 20000 | 1.07 | .15 | .85 | 450 | 5100 | 14450 | .1561 | .8439 | 496 | 5364 | 14496 | 450 | 5457 | 14450 | -357 | 6.06  |
| 20000 | 1.08 | .15 | .85 | 450 | 5100 | 14450 | .1570 | .8430 | 503 | 5402 | 14503 | 450 | 5508 | 14450 | -408 | 7.86  |
| 20000 | 1.09 | .15 | .85 | 450 | 5100 | 14450 | .1579 | .8421 | 510 | 5439 | 14510 | 450 | 5559 | 14450 | -459 | 9.89  |
| 20000 | 1.10 | .15 | .85 | 450 | 5100 | 14450 | .1587 | .8413 | 517 | 5477 | 14517 | 450 | 5610 | 14450 | -510 | 12.12 |
| 20000 | 1.11 | .15 | .85 | 450 | 5100 | 14450 | .1595 | .8405 | 523 | 5514 | 14523 | 450 | 5661 | 14450 | -561 | 14.57 |
| 20000 | 1.12 | .15 | .85 | 450 | 5100 | 14450 | .1604 | .8396 | 530 | 5551 | 14530 | 450 | 5712 | 14450 | -612 | 17.23 |
| 20000 | 1.13 | .15 | .85 | 450 | 5100 | 14450 | .1612 | .8388 | 537 | 5589 | 14537 | 450 | 5763 | 14450 | -663 | 20.09 |
| 20000 | 1.14 | .15 | .85 | 450 | 5100 | 14450 | .1621 | .8379 | 544 | 5626 | 14544 | 450 | 5814 | 14450 | -714 | 23.16 |
| 20000 | 1.15 | .15 | .85 | 450 | 5100 | 14450 | .1629 | .8371 | 551 | 5663 | 14551 | 450 | 5865 | 14450 | -765 | 26.42 |



|       |      |     |     |     |      |       |       |       |     |      |       |     |      |       |       |       |
|-------|------|-----|-----|-----|------|-------|-------|-------|-----|------|-------|-----|------|-------|-------|-------|
| 20000 | 1.16 | .15 | .85 | 450 | 5100 | 14450 | .1637 | .8363 | 558 | 5700 | 14558 | 450 | 5916 | 14450 | -816  | 29.87 |
| 20000 | 1.17 | .15 | .85 | 450 | 5100 | 14450 | .1645 | .8355 | 565 | 5737 | 14565 | 450 | 5967 | 14450 | -867  | 33.51 |
| 20000 | 1.18 | .15 | .85 | 450 | 5100 | 14450 | .1654 | .8346 | 572 | 5774 | 14572 | 450 | 6018 | 14450 | -918  | 37.34 |
| 20000 | 1.19 | .15 | .85 | 450 | 5100 | 14450 | .1662 | .8338 | 579 | 5811 | 14579 | 450 | 6069 | 14450 | -969  | 41.36 |
| 20000 | 1.20 | .15 | .85 | 450 | 5100 | 14450 | .1670 | .8330 | 586 | 5848 | 14586 | 450 | 6120 | 14450 | -1020 | 45.55 |
| 20000 | .80  | .20 | .80 | 800 | 6400 | 12800 | .1795 | .8205 | 603 | 5514 | 12603 | 800 | 5120 | 12800 | 1280  | 95.51 |
| 20000 | .81  | .20 | .80 | 800 | 6400 | 12800 | .1806 | .8194 | 613 | 5559 | 12613 | 800 | 5184 | 12800 | 1216  | 85.46 |
| 20000 | .82  | .20 | .80 | 800 | 6400 | 12800 | .1817 | .8183 | 622 | 5604 | 12622 | 800 | 5248 | 12800 | 1152  | 76.05 |
| 20000 | .83  | .20 | .80 | 800 | 6400 | 12800 | .1827 | .8173 | 632 | 5649 | 12632 | 800 | 5312 | 12800 | 1088  | 67.27 |
| 20000 | .84  | .20 | .80 | 800 | 6400 | 12800 | .1838 | .8162 | 641 | 5694 | 12641 | 800 | 5376 | 12800 | 1024  | 59.09 |
| 20000 | .85  | .20 | .80 | 800 | 6400 | 12800 | .1849 | .8151 | 651 | 5738 | 12651 | 800 | 5440 | 12800 | 960   | 51.51 |
| 20000 | .86  | .20 | .80 | 800 | 6400 | 12800 | .1859 | .8141 | 660 | 5783 | 12660 | 800 | 5504 | 12800 | 896   | 44.51 |
| 20000 | .87  | .20 | .80 | 800 | 6400 | 12800 | .1870 | .8130 | 670 | 5828 | 12670 | 800 | 5568 | 12800 | 832   | 38.08 |
| 20000 | .88  | .20 | .80 | 800 | 6400 | 12800 | .1880 | .8120 | 680 | 5872 | 12680 | 800 | 5632 | 12800 | 768   | 32.19 |
| 20000 | .89  | .20 | .80 | 800 | 6400 | 12800 | .1891 | .8109 | 690 | 5917 | 12690 | 800 | 5696 | 12800 | 704   | 26.84 |
| 20000 | .90  | .20 | .80 | 800 | 6400 | 12800 | .1901 | .8099 | 700 | 5961 | 12700 | 800 | 5760 | 12800 | 640   | 22.01 |
| 20000 | .91  | .20 | .80 | 800 | 6400 | 12800 | .1911 | .8089 | 709 | 6005 | 12709 | 800 | 5824 | 12800 | 576   | 17.69 |
| 20000 | .92  | .20 | .80 | 800 | 6400 | 12800 | .1921 | .8079 | 719 | 6049 | 12719 | 800 | 5888 | 12800 | 512   | 13.88 |
| 20000 | .93  | .20 | .80 | 800 | 6400 | 12800 | .1931 | .8069 | 729 | 6094 | 12729 | 800 | 5952 | 12800 | 448   | 10.54 |
| 20000 | .94  | .20 | .80 | 800 | 6400 | 12800 | .1941 | .8059 | 739 | 6138 | 12739 | 800 | 6016 | 12800 | 384   | 7.69  |
| 20000 | .95  | .20 | .80 | 800 | 6400 | 12800 | .1951 | .8049 | 749 | 6181 | 12749 | 800 | 6080 | 12800 | 320   | 5.30  |
| 20000 | .96  | .20 | .80 | 800 | 6400 | 12800 | .1961 | .8039 | 759 | 6225 | 12759 | 800 | 6144 | 12800 | 256   | 3.37  |
| 20000 | .97  | .20 | .80 | 800 | 6400 | 12800 | .1971 | .8029 | 769 | 6269 | 12769 | 800 | 6208 | 12800 | 192   | 1.88  |
| 20000 | .98  | .20 | .80 | 800 | 6400 | 12800 | .1981 | .8019 | 780 | 6313 | 12780 | 800 | 6272 | 12800 | 128   | .83   |
| 20000 | .99  | .20 | .80 | 800 | 6400 | 12800 | .1990 | .8010 | 790 | 6356 | 12790 | 800 | 6336 | 12800 | 64    | .21   |
| 20000 | 1.00 | .20 | .80 | 800 | 6400 | 12800 | .2000 | .8000 | 800 | 6400 | 12800 | 800 | 6400 | 12800 | 0     | .00   |
| 20000 | 1.01 | .20 | .80 | 800 | 6400 | 12800 | .2010 | .7990 | 810 | 6443 | 12810 | 800 | 6464 | 12800 | -64   | .20   |
| 20000 | 1.02 | .20 | .80 | 800 | 6400 | 12800 | .2019 | .7981 | 821 | 6487 | 12821 | 800 | 6528 | 12800 | -128  | .81   |
| 20000 | 1.03 | .20 | .80 | 800 | 6400 | 12800 | .2029 | .7971 | 831 | 6530 | 12831 | 800 | 6592 | 12800 | -192  | 1.81  |
| 20000 | 1.04 | .20 | .80 | 800 | 6400 | 12800 | .2038 | .7962 | 841 | 6573 | 12841 | 800 | 6656 | 12800 | -256  | 3.19  |
| 20000 | 1.05 | .20 | .80 | 800 | 6400 | 12800 | .2047 | .7953 | 852 | 6617 | 12852 | 800 | 6720 | 12800 | -320  | 4.95  |
| 20000 | 1.06 | .20 | .80 | 800 | 6400 | 12800 | .2057 | .7943 | 862 | 6660 | 12862 | 800 | 6784 | 12800 | -384  | 7.09  |
| 20000 | 1.07 | .20 | .80 | 800 | 6400 | 12800 | .2066 | .7934 | 873 | 6703 | 12873 | 800 | 6848 | 12800 | -448  | 9.59  |

|       |      |     |     |      |      |       |       |       |      |      |       |      |      |       |       |        |
|-------|------|-----|-----|------|------|-------|-------|-------|------|------|-------|------|------|-------|-------|--------|
| 20000 | 1.08 | .20 | .80 | 800  | 6400 | 12800 | .2075 | .7925 | 883  | 6746 | 12883 | 800  | 6912 | 12800 | -512  | 12.44  |
| 20000 | 1.09 | .20 | .80 | 800  | 6400 | 12800 | .2084 | .7916 | 894  | 6789 | 12894 | 800  | 6976 | 12800 | -576  | 15.65  |
| 20000 | 1.10 | .20 | .80 | 800  | 6400 | 12800 | .2093 | .7907 | 904  | 6832 | 12904 | 800  | 7040 | 12800 | -640  | 19.20  |
| 20000 | 1.11 | .20 | .80 | 800  | 6400 | 12800 | .2102 | .7898 | 915  | 6874 | 12915 | 800  | 7104 | 12800 | -704  | 23.09  |
| 20000 | 1.12 | .20 | .80 | 800  | 6400 | 12800 | .2111 | .7889 | 925  | 6917 | 12925 | 800  | 7168 | 12800 | -768  | 27.32  |
| 20000 | 1.13 | .20 | .80 | 800  | 6400 | 12800 | .2120 | .7880 | 936  | 6960 | 12936 | 800  | 7232 | 12800 | -832  | 31.87  |
| 20000 | 1.14 | .20 | .80 | 800  | 6400 | 12800 | .2129 | .7871 | 947  | 7002 | 12947 | 800  | 7296 | 12800 | -896  | 36.74  |
| 20000 | 1.15 | .20 | .80 | 800  | 6400 | 12800 | .2137 | .7863 | 958  | 7045 | 12958 | 800  | 7360 | 12800 | -960  | 41.94  |
| 20000 | 1.16 | .20 | .80 | 800  | 6400 | 12800 | .2146 | .7854 | 968  | 7087 | 12968 | 800  | 7424 | 12800 | -1024 | 47.44  |
| 20000 | 1.17 | .20 | .80 | 800  | 6400 | 12800 | .2155 | .7845 | 979  | 7130 | 12979 | 800  | 7488 | 12800 | -1088 | 53.25  |
| 20000 | 1.18 | .20 | .80 | 800  | 6400 | 12800 | .2163 | .7837 | 990  | 7172 | 12990 | 800  | 7552 | 12800 | -1152 | 59.36  |
| 20000 | 1.19 | .20 | .80 | 800  | 6400 | 12800 | .2172 | .7828 | 1001 | 7214 | 13001 | 800  | 7616 | 12800 | -1216 | 65.77  |
| 20000 | 1.20 | .20 | .80 | 800  | 6400 | 12800 | .2180 | .7820 | 1012 | 7257 | 13012 | 800  | 7680 | 12800 | -1280 | 72.47  |
| 20000 | .80  | .25 | .75 | 1250 | 7500 | 11250 | .2297 | .7703 | 976  | 6547 | 10976 | 1250 | 6000 | 11250 | 1500  | 129.27 |
| 20000 | .81  | .25 | .75 | 1250 | 7500 | 11250 | .2308 | .7692 | 990  | 6596 | 10990 | 1250 | 6075 | 11250 | 1425  | 115.77 |
| 20000 | .82  | .25 | .75 | 1250 | 7500 | 11250 | .2319 | .7681 | 1003 | 6644 | 11003 | 1250 | 6150 | 11250 | 1350  | 103.12 |
| 20000 | .83  | .25 | .75 | 1250 | 7500 | 11250 | .2330 | .7670 | 1016 | 6692 | 11016 | 1250 | 6225 | 11250 | 1275  | 91.29  |
| 20000 | .84  | .25 | .75 | 1250 | 7500 | 11250 | .2340 | .7660 | 1030 | 6740 | 11030 | 1250 | 6300 | 11250 | 1200  | 80.27  |
| 20000 | .85  | .25 | .75 | 1250 | 7500 | 11250 | .2351 | .7649 | 1043 | 6788 | 11043 | 1250 | 6375 | 11250 | 1125  | 70.03  |
| 20000 | .86  | .25 | .75 | 1250 | 7500 | 11250 | .2361 | .7639 | 1057 | 6836 | 11057 | 1250 | 6450 | 11250 | 1050  | 60.56  |
| 20000 | .87  | .25 | .75 | 1250 | 7500 | 11250 | .2372 | .7628 | 1070 | 6884 | 11070 | 1250 | 6525 | 11250 | 975   | 51.84  |
| 20000 | .88  | .25 | .75 | 1250 | 7500 | 11250 | .2382 | .7618 | 1084 | 6932 | 11084 | 1250 | 6600 | 11250 | 900   | 43.86  |
| 20000 | .89  | .25 | .75 | 1250 | 7500 | 11250 | .2392 | .7608 | 1098 | 6980 | 11098 | 1250 | 6675 | 11250 | 825   | 36.60  |
| 20000 | .90  | .25 | .75 | 1250 | 7500 | 11250 | .2403 | .7597 | 1111 | 7028 | 11111 | 1250 | 6750 | 11250 | 750   | 30.04  |
| 20000 | .91  | .25 | .75 | 1250 | 7500 | 11250 | .2413 | .7587 | 1125 | 7075 | 11125 | 1250 | 6825 | 11250 | 675   | 24.16  |
| 20000 | .92  | .25 | .75 | 1250 | 7500 | 11250 | .2423 | .7577 | 1139 | 7123 | 11139 | 1250 | 6900 | 11250 | 600   | 18.96  |
| 20000 | .93  | .25 | .75 | 1250 | 7500 | 11250 | .2433 | .7567 | 1152 | 7170 | 11152 | 1250 | 6975 | 11250 | 525   | 14.42  |
| 20000 | .94  | .25 | .75 | 1250 | 7500 | 11250 | .2442 | .7558 | 1166 | 7217 | 11166 | 1250 | 7050 | 11250 | 450   | 10.52  |
| 20000 | .95  | .25 | .75 | 1250 | 7500 | 11250 | .2452 | .7548 | 1180 | 7265 | 11180 | 1250 | 7125 | 11250 | 375   | 7.26   |
| 20000 | .96  | .25 | .75 | 1250 | 7500 | 11250 | .2462 | .7538 | 1194 | 7312 | 11194 | 1250 | 7200 | 11250 | 300   | 4.62   |

|       |      |     |     |      |      |       |       |       |      |      |       |      |      |       |       |        |
|-------|------|-----|-----|------|------|-------|-------|-------|------|------|-------|------|------|-------|-------|--------|
| 20000 | .97  | .25 | .75 | 1250 | 7500 | 11250 | .2472 | .7528 | 1208 | 7359 | 11208 | 1250 | 7275 | 11250 | 225   | 2.58   |
| 20000 | .98  | .25 | .75 | 1250 | 7500 | 11250 | .2481 | .7519 | 1222 | 7406 | 11222 | 1250 | 7350 | 11250 | 150   | 1.14   |
| 20000 | .99  | .25 | .75 | 1250 | 7500 | 11250 | .2491 | .7509 | 1236 | 7453 | 11236 | 1250 | 7425 | 11250 | 75    | .28    |
| 20000 | 1.00 | .25 | .75 | 1250 | 7500 | 11250 | .2500 | .7500 | 1250 | 7500 | 11250 | 1250 | 7500 | 11250 | 0     | .00    |
| 20000 | 1.01 | .25 | .75 | 1250 | 7500 | 11250 | .2509 | .7491 | 1264 | 7547 | 11264 | 1250 | 7575 | 11250 | -75   | .28    |
| 20000 | 1.02 | .25 | .75 | 1250 | 7500 | 11250 | .2519 | .7481 | 1278 | 7594 | 11278 | 1250 | 7650 | 11250 | -150  | 1.11   |
| 20000 | 1.03 | .25 | .75 | 1250 | 7500 | 11250 | .2528 | .7472 | 1292 | 7640 | 11292 | 1250 | 7725 | 11250 | -225  | 2.48   |
| 20000 | 1.04 | .25 | .75 | 1250 | 7500 | 11250 | .2537 | .7463 | 1307 | 7687 | 11307 | 1250 | 7800 | 11250 | -300  | 4.39   |
| 20000 | 1.05 | .25 | .75 | 1250 | 7500 | 11250 | .2546 | .7454 | 1321 | 7734 | 11321 | 1250 | 7875 | 11250 | -375  | 6.82   |
| 20000 | 1.06 | .25 | .75 | 1250 | 7500 | 11250 | .2555 | .7445 | 1335 | 7780 | 11335 | 1250 | 7950 | 11250 | -450  | 9.76   |
| 20000 | 1.07 | .25 | .75 | 1250 | 7500 | 11250 | .2564 | .7436 | 1349 | 7826 | 11349 | 1250 | 8025 | 11250 | -525  | 13.21  |
| 20000 | 1.08 | .25 | .75 | 1250 | 7500 | 11250 | .2573 | .7427 | 1364 | 7873 | 11364 | 1250 | 8100 | 11250 | -600  | 17.15  |
| 20000 | 1.09 | .25 | .75 | 1250 | 7500 | 11250 | .2582 | .7418 | 1378 | 7919 | 11378 | 1250 | 8175 | 11250 | -675  | 21.59  |
| 20000 | 1.10 | .25 | .75 | 1250 | 7500 | 11250 | .2590 | .7410 | 1392 | 7965 | 11392 | 1250 | 8250 | 11250 | -750  | 26.50  |
| 20000 | 1.11 | .25 | .75 | 1250 | 7500 | 11250 | .2599 | .7401 | 1407 | 8012 | 11407 | 1250 | 8325 | 11250 | -825  | 31.88  |
| 20000 | 1.12 | .25 | .75 | 1250 | 7500 | 11250 | .2608 | .7392 | 1421 | 8058 | 11421 | 1250 | 8400 | 11250 | -900  | 37.73  |
| 20000 | 1.13 | .25 | .75 | 1250 | 7500 | 11250 | .2616 | .7384 | 1436 | 8104 | 11436 | 1250 | 8475 | 11250 | -975  | 44.03  |
| 20000 | 1.14 | .25 | .75 | 1250 | 7500 | 11250 | .2625 | .7375 | 1450 | 8150 | 11450 | 1250 | 8550 | 11250 | -1050 | 50.78  |
| 20000 | 1.15 | .25 | .75 | 1250 | 7500 | 11250 | .2633 | .7367 | 1465 | 8196 | 11465 | 1250 | 8625 | 11250 | -1125 | 57.98  |
| 20000 | 1.16 | .25 | .75 | 1250 | 7500 | 11250 | .2642 | .7358 | 1479 | 8242 | 11479 | 1250 | 8700 | 11250 | -1200 | 65.61  |
| 20000 | 1.17 | .25 | .75 | 1250 | 7500 | 11250 | .2650 | .7350 | 1494 | 8287 | 11494 | 1250 | 8775 | 11250 | -1275 | 73.67  |
| 20000 | 1.18 | .25 | .75 | 1250 | 7500 | 11250 | .2658 | .7342 | 1508 | 8333 | 11508 | 1250 | 8850 | 11250 | -1350 | 82.16  |
| 20000 | 1.19 | .25 | .75 | 1250 | 7500 | 11250 | .2666 | .7334 | 1523 | 8379 | 11523 | 1250 | 8925 | 11250 | -1425 | 91.05  |
| 20000 | 1.20 | .25 | .75 | 1250 | 7500 | 11250 | .2674 | .7326 | 1538 | 8424 | 11538 | 1250 | 9000 | 11250 | -1500 | 100.36 |
| 20000 | .80  | .30 | .70 | 1800 | 8400 | 9800  | .2817 | .7183 | 1453 | 7413 | 9453  | 1800 | 6720 | 9800  | 1680  | 160.22 |
| 20000 | .81  | .30 | .70 | 1800 | 8400 | 9800  | .2827 | .7173 | 1470 | 7463 | 9470  | 1800 | 6804 | 9800  | 1596  | 143.60 |
| 20000 | .82  | .30 | .70 | 1800 | 8400 | 9800  | .2836 | .7164 | 1487 | 7513 | 9487  | 1800 | 6888 | 9800  | 1512  | 128.00 |
| 20000 | .83  | .30 | .70 | 1800 | 8400 | 9800  | .2846 | .7154 | 1505 | 7563 | 9505  | 1800 | 6972 | 9800  | 1428  | 113.40 |

|       |      |     |     |      |      |      |       |       |      |      |       |      |      |      |       |       |
|-------|------|-----|-----|------|------|------|-------|-------|------|------|-------|------|------|------|-------|-------|
| 20000 | .84  | .30 | .70 | 1800 | 8400 | 9800 | .2856 | .7144 | 1522 | 7613 | 9522  | 1800 | 7056 | 9800 | 1344  | 99.78 |
| 20000 | .85  | .30 | .70 | 1800 | 8400 | 9800 | .2866 | .7134 | 1539 | 7662 | 9539  | 1800 | 7140 | 9800 | 1260  | 87.11 |
| 20000 | .86  | .30 | .70 | 1800 | 8400 | 9800 | .2875 | .7125 | 1556 | 7712 | 9556  | 1800 | 7224 | 9800 | 1176  | 75.39 |
| 20000 | .87  | .30 | .70 | 1800 | 8400 | 9800 | .2884 | .7116 | 1573 | 7762 | 9573  | 1800 | 7308 | 9800 | 1092  | 64.58 |
| 20000 | .88  | .30 | .70 | 1800 | 8400 | 9800 | .2894 | .7106 | 1590 | 7811 | 9590  | 1800 | 7392 | 9800 | 1008  | 54.67 |
| 20000 | .89  | .30 | .70 | 1800 | 8400 | 9800 | .2903 | .7097 | 1608 | 7860 | 9608  | 1800 | 7476 | 9800 | 924   | 45.64 |
| 20000 | .90  | .30 | .70 | 1800 | 8400 | 9800 | .2912 | .7088 | 1625 | 7910 | 9625  | 1800 | 7560 | 9800 | 840   | 37.48 |
| 20000 | .91  | .30 | .70 | 1800 | 8400 | 9800 | .2921 | .7079 | 1642 | 7959 | 9642  | 1800 | 7644 | 9800 | 756   | 30.17 |
| 20000 | .92  | .30 | .70 | 1800 | 8400 | 9800 | .2930 | .7070 | 1660 | 8008 | 9660  | 1800 | 7728 | 9800 | 672   | 23.69 |
| 20000 | .93  | .30 | .70 | 1800 | 8400 | 9800 | .2939 | .7061 | 1677 | 8058 | 9677  | 1800 | 7812 | 9800 | 588   | 18.03 |
| 20000 | .94  | .30 | .70 | 1800 | 8400 | 9800 | .2948 | .7052 | 1695 | 8107 | 9695  | 1800 | 7896 | 9800 | 504   | 13.16 |
| 20000 | .95  | .30 | .70 | 1800 | 8400 | 9800 | .2957 | .7043 | 1712 | 8156 | 9712  | 1800 | 7980 | 9800 | 420   | 9.09  |
| 20000 | .96  | .30 | .70 | 1800 | 8400 | 9800 | .2966 | .7034 | 1730 | 8205 | 9730  | 1800 | 8064 | 9800 | 336   | 5.78  |
| 20000 | .97  | .30 | .70 | 1800 | 8400 | 9800 | .2974 | .7026 | 1747 | 8254 | 9747  | 1800 | 8148 | 9800 | 252   | 3.23  |
| 20000 | .98  | .30 | .70 | 1800 | 8400 | 9800 | .2983 | .7017 | 1765 | 8302 | 9765  | 1800 | 8232 | 9800 | 168   | 1.43  |
| 20000 | .99  | .30 | .70 | 1800 | 8400 | 9800 | .2992 | .7008 | 1782 | 8351 | 9782  | 1800 | 8316 | 9800 | 84    | .35   |
| 20000 | 1.00 | .30 | .70 | 1800 | 8400 | 9800 | .3000 | .7000 | 1800 | 8400 | 9800  | 1800 | 8400 | 9800 | 0     | .00   |
| 20000 | 1.01 | .30 | .70 | 1800 | 8400 | 9800 | .3008 | .6992 | 1818 | 8449 | 9818  | 1800 | 8484 | 9800 | -84   | .35   |
| 20000 | 1.02 | .30 | .70 | 1800 | 8400 | 9800 | .3017 | .6983 | 1835 | 8497 | 9835  | 1800 | 8568 | 9800 | -168  | 1.40  |
| 20000 | 1.03 | .30 | .70 | 1800 | 8400 | 9800 | .3025 | .6975 | 1853 | 8546 | 9853  | 1800 | 8652 | 9800 | -252  | 3.12  |
| 20000 | 1.04 | .30 | .70 | 1800 | 8400 | 9800 | .3033 | .6967 | 1871 | 8594 | 9871  | 1800 | 8736 | 9800 | -336  | 5.52  |
| 20000 | 1.05 | .30 | .70 | 1800 | 8400 | 9800 | .3041 | .6959 | 1889 | 8643 | 9889  | 1800 | 8820 | 9800 | -420  | 8.57  |
| 20000 | 1.06 | .30 | .70 | 1800 | 8400 | 9800 | .3049 | .6951 | 1906 | 8691 | 9906  | 1800 | 8904 | 9800 | -504  | 12.28 |
| 20000 | 1.07 | .30 | .70 | 1800 | 8400 | 9800 | .3057 | .6943 | 1924 | 8740 | 9924  | 1800 | 8988 | 9800 | -588  | 16.62 |
| 20000 | 1.08 | .30 | .70 | 1800 | 8400 | 9800 | .3065 | .6935 | 1942 | 8788 | 9942  | 1800 | 9072 | 9800 | -672  | 21.59 |
| 20000 | 1.09 | .30 | .70 | 1800 | 8400 | 9800 | .3073 | .6927 | 1960 | 8836 | 9960  | 1800 | 9156 | 9800 | -756  | 27.17 |
| 20000 | 1.10 | .30 | .70 | 1800 | 8400 | 9800 | .3081 | .6919 | 1978 | 8884 | 9978  | 1800 | 9240 | 9800 | -840  | 33.37 |
| 20000 | 1.11 | .30 | .70 | 1800 | 8400 | 9800 | .3088 | .6912 | 1996 | 8933 | 9996  | 1800 | 9324 | 9800 | -924  | 40.16 |
| 20000 | 1.12 | .30 | .70 | 1800 | 8400 | 9800 | .3096 | .6904 | 2014 | 8981 | 10014 | 1800 | 9408 | 9800 | -1008 | 47.54 |
| 20000 | 1.13 | .30 | .70 | 1800 | 8400 | 9800 | .3104 | .6896 | 2032 | 9029 | 10032 | 1800 | 9492 | 9800 | -1092 | 55.50 |
| 20000 | 1.14 | .30 | .70 | 1800 | 8400 | 9800 | .3111 | .6889 | 2050 | 9077 | 10050 | 1800 | 9576 | 9800 | -1176 | 64.04 |
| 20000 | 1.15 | .30 | .70 | 1800 | 8400 | 9800 | .3119 | .6881 | 2068 | 9125 | 10068 | 1800 | 9660 | 9800 | -1260 | 73.13 |
| 20000 | 1.16 | .30 | .70 | 1800 | 8400 | 9800 | .3126 | .6874 | 2086 | 9173 | 10086 | 1800 | 9744 | 9800 | -1344 | 82.78 |

|       |      |     |     |      |      |      |       |       |      |      |       |      |       |      |       |        |
|-------|------|-----|-----|------|------|------|-------|-------|------|------|-------|------|-------|------|-------|--------|
| 20000 | 1.17 | .30 | .70 | 1800 | 8400 | 9800 | .3133 | .6867 | 2104 | 9221 | 10104 | 1800 | 9828  | 9800 | -1428 | 92.98  |
| 20000 | 1.18 | .30 | .70 | 1800 | 8400 | 9800 | .3141 | .6859 | 2122 | 9268 | 10122 | 1800 | 9912  | 9800 | -1512 | 103.71 |
| 20000 | 1.19 | .30 | .70 | 1800 | 8400 | 9800 | .3148 | .6852 | 2140 | 9316 | 10140 | 1800 | 9996  | 9800 | -1596 | 114.97 |
| 20000 | 1.20 | .30 | .70 | 1800 | 8400 | 9800 | .3155 | .6845 | 2158 | 9364 | 10158 | 1800 | 10080 | 9800 | -1680 | 126.76 |
| 20000 | .80  | .35 | .65 | 2450 | 9100 | 8450 | .3350 | .6650 | 2040 | 8100 | 8040  | 2450 | 7280  | 8450 | 1820  | 186.28 |
| 20000 | .81  | .35 | .65 | 2450 | 9100 | 8450 | .3358 | .6642 | 2060 | 8150 | 8060  | 2450 | 7371  | 8450 | 1729  | 167.05 |
| 20000 | .82  | .35 | .65 | 2450 | 9100 | 8450 | .3366 | .6634 | 2081 | 8201 | 8081  | 2450 | 7462  | 8450 | 1638  | 148.99 |
| 20000 | .83  | .35 | .65 | 2450 | 9100 | 8450 | .3374 | .6626 | 2101 | 8251 | 8101  | 2450 | 7553  | 8450 | 1547  | 132.07 |
| 20000 | .84  | .35 | .65 | 2450 | 9100 | 8450 | .3382 | .6618 | 2121 | 8301 | 8121  | 2450 | 7644  | 8450 | 1456  | 116.27 |
| 20000 | .85  | .35 | .65 | 2450 | 9100 | 8450 | .3390 | .6610 | 2142 | 8352 | 8142  | 2450 | 7735  | 8450 | 1365  | 101.57 |
| 20000 | .86  | .35 | .65 | 2450 | 9100 | 8450 | .3398 | .6602 | 2162 | 8402 | 8162  | 2450 | 7826  | 8450 | 1274  | 87.94  |
| 20000 | .87  | .35 | .65 | 2450 | 9100 | 8450 | .3406 | .6594 | 2183 | 8452 | 8183  | 2450 | 7917  | 8450 | 1183  | 75.37  |
| 20000 | .88  | .35 | .65 | 2450 | 9100 | 8450 | .3413 | .6587 | 2203 | 8502 | 8203  | 2450 | 8008  | 8450 | 1092  | 63.84  |
| 20000 | .89  | .35 | .65 | 2450 | 9100 | 8450 | .3421 | .6579 | 2223 | 8552 | 8223  | 2450 | 8099  | 8450 | 1001  | 53.33  |
| 20000 | .90  | .35 | .65 | 2450 | 9100 | 8450 | .3428 | .6572 | 2244 | 8602 | 8244  | 2450 | 8190  | 8450 | 910   | 43.81  |
| 20000 | .91  | .35 | .65 | 2450 | 9100 | 8450 | .3436 | .6564 | 2264 | 8652 | 8264  | 2450 | 8281  | 8450 | 819   | 35.28  |
| 20000 | .92  | .35 | .65 | 2450 | 9100 | 8450 | .3443 | .6557 | 2285 | 8702 | 8285  | 2450 | 8372  | 8450 | 728   | 27.72  |
| 20000 | .93  | .35 | .65 | 2450 | 9100 | 8450 | .3451 | .6549 | 2306 | 8752 | 8306  | 2450 | 8463  | 8450 | 637   | 21.10  |
| 20000 | .94  | .35 | .65 | 2450 | 9100 | 8450 | .3458 | .6542 | 2326 | 8802 | 8326  | 2450 | 8554  | 8450 | 546   | 15.41  |
| 20000 | .95  | .35 | .65 | 2450 | 9100 | 8450 | .3465 | .6535 | 2347 | 8852 | 8347  | 2450 | 8645  | 8450 | 455   | 10.64  |
| 20000 | .96  | .35 | .65 | 2450 | 9100 | 8450 | .3472 | .6528 | 2367 | 8901 | 8367  | 2450 | 8736  | 8450 | 364   | 6.77   |
| 20000 | .97  | .35 | .65 | 2450 | 9100 | 8450 | .3479 | .6521 | 2388 | 8951 | 8388  | 2450 | 8827  | 8450 | 273   | 3.79   |
| 20000 | .98  | .35 | .65 | 2450 | 9100 | 8450 | .3486 | .6514 | 2409 | 9001 | 8409  | 2450 | 8918  | 8450 | 182   | 1.67   |
| 20000 | .99  | .35 | .65 | 2450 | 9100 | 8450 | .3493 | .6507 | 2429 | 9050 | 8429  | 2450 | 9009  | 8450 | 91    | .42    |

|       |      |     |     |      |      |      |       |       |      |       |      |      |       |      |       |            |
|-------|------|-----|-----|------|------|------|-------|-------|------|-------|------|------|-------|------|-------|------------|
| 20000 | 1.00 | .35 | .65 | 2450 | 9100 | 8450 | .3500 | .6500 | 2450 | 9100  | 8450 | 2450 | 9100  | 8450 | 0     | .00        |
| 20000 | 1.01 | .35 | .65 | 2450 | 9100 | 8450 | .3507 | .6493 | 2471 | 9150  | 8471 | 2450 | 9191  | 8450 | -91   | .41        |
| 20000 | 1.02 | .35 | .65 | 2450 | 9100 | 8450 | .3514 | .6486 | 2491 | 9199  | 8491 | 2450 | 9282  | 8450 | -182  | 1.64       |
| 20000 | 1.03 | .35 | .65 | 2450 | 9100 | 8450 | .3520 | .6480 | 2512 | 9249  | 8512 | 2450 | 9373  | 8450 | -273  | 3.67       |
| 20000 | 1.04 | .35 | .65 | 2450 | 9100 | 8450 | .3527 | .6473 | 2533 | 9298  | 8533 | 2450 | 9464  | 8450 | -364  | 6.48       |
| 20000 | 1.05 | .35 | .65 | 2450 | 9100 | 8450 | .3533 | .6467 | 2554 | 9348  | 8554 | 2450 | 9555  | 8450 | -455  | 10.08      |
| 20000 | 1.06 | .35 | .65 | 2450 | 9100 | 8450 | .3540 | .6460 | 2575 | 9397  | 8575 | 2450 | 9646  | 8450 | -546  | 14.44      |
| 20000 | 1.07 | .35 | .65 | 2450 | 9100 | 8450 | .3546 | .6454 | 2595 | 9446  | 8595 | 2450 | 9737  | 8450 | -637  | 19.55      |
| 20000 | 1.08 | .35 | .65 | 2450 | 9100 | 8450 | .3553 | .6447 | 2616 | 9496  | 8616 | 2450 | 9828  | 8450 | -728  | 25.40      |
| 20000 | 1.09 | .35 | .65 | 2450 | 9100 | 8450 | .3559 | .6441 | 2637 | 9545  | 8637 | 2450 | 9919  | 8450 | -819  | 31.98      |
| 20000 | 1.10 | .35 | .65 | 2450 | 9100 | 8450 | .3565 | .6435 | 2658 | 9594  | 8658 | 2450 | 10010 | 8450 | -910  | 39.28      |
| 20000 | 1.11 | .35 | .65 | 2450 | 9100 | 8450 | .3571 | .6429 | 2679 | 9643  | 8679 | 2450 | 10101 | 8450 | -1001 | 47.29      |
| 20000 | 1.12 | .35 | .65 | 2450 | 9100 | 8450 | .3578 | .6422 | 2700 | 9693  | 8700 | 2450 | 10192 | 8450 | -1092 | 55.99      |
| 20000 | 1.13 | .35 | .65 | 2450 | 9100 | 8450 | .3584 | .6416 | 2721 | 9742  | 8721 | 2450 | 10283 | 8450 | -1183 | 65.39      |
| 20000 | 1.14 | .35 | .65 | 2450 | 9100 | 8450 | .3590 | .6410 | 2742 | 9791  | 8742 | 2450 | 10374 | 8450 | -1274 | 75.46      |
| 20000 | 1.15 | .35 | .65 | 2450 | 9100 | 8450 | .3596 | .6404 | 2762 | 9840  | 8762 | 2450 | 10465 | 8450 | -1365 | 86.19      |
| 20000 | 1.16 | .35 | .65 | 2450 | 9100 | 8450 | .3602 | .6398 | 2783 | 9889  | 8783 | 2450 | 10556 | 8450 | -1456 | 97.59      |
| 20000 | 1.17 | .35 | .65 | 2450 | 9100 | 8450 | .3608 | .6392 | 2804 | 9938  | 8804 | 2450 | 10647 | 8450 | -1547 | 109.6<br>3 |
| 20000 | 1.18 | .35 | .65 | 2450 | 9100 | 8450 | .3614 | .6386 | 2825 | 9987  | 8825 | 2450 | 10738 | 8450 | -1638 | 122.3<br>1 |
| 20000 | 1.19 | .35 | .65 | 2450 | 9100 | 8450 | .3619 | .6381 | 2846 | 10036 | 8846 | 2450 | 10829 | 8450 | -1729 | 135.6<br>2 |
| 20000 | 1.20 | .35 | .65 | 2450 | 9100 | 8450 | .3625 | .6375 | 2867 | 10085 | 8867 | 2450 | 10920 | 8450 | -1820 | 149.5<br>5 |
| 20000 | .80  | .40 | .60 | 3200 | 9600 | 7200 | .3894 | .6106 | 2741 | 8598  | 6741 | 3200 | 7680  | 7200 | 1920  | 205.9<br>1 |
| 20000 | .81  | .40 | .60 | 3200 | 9600 | 7200 | .3900 | .6100 | 2764 | 8648  | 6764 | 3200 | 7776  | 7200 | 1824  | 184.7<br>5 |
| 20000 | .82  | .40 | .60 | 3200 | 9600 | 7200 | .3905 | .6095 | 2787 | 8698  | 6787 | 3200 | 7872  | 7200 | 1728  | 164.8<br>4 |
| 20000 | .83  | .40 | .60 | 3200 | 9600 | 7200 | .3911 | .6089 | 2810 | 8748  | 6810 | 3200 | 7968  | 7200 | 1632  | 146.1<br>8 |

|       |      |     |     |      |      |      |       |       |      |       |      |      |       |      |       |        |
|-------|------|-----|-----|------|------|------|-------|-------|------|-------|------|------|-------|------|-------|--------|
| 20000 | .84  | .40 | .60 | 3200 | 9600 | 7200 | .3917 | .6083 | 2833 | 8799  | 6833 | 3200 | 8064  | 7200 | 1536  | 128.75 |
| 20000 | .85  | .40 | .60 | 3200 | 9600 | 7200 | .3922 | .6078 | 2856 | 8849  | 6856 | 3200 | 8160  | 7200 | 1440  | 112.51 |
| 20000 | .86  | .40 | .60 | 3200 | 9600 | 7200 | .3928 | .6072 | 2878 | 8899  | 6878 | 3200 | 8256  | 7200 | 1344  | 97.45  |
| 20000 | .87  | .40 | .60 | 3200 | 9600 | 7200 | .3933 | .6067 | 2901 | 8949  | 6901 | 3200 | 8352  | 7200 | 1248  | 83.55  |
| 20000 | .88  | .40 | .60 | 3200 | 9600 | 7200 | .3939 | .6061 | 2924 | 9000  | 6924 | 3200 | 8448  | 7200 | 1152  | 70.79  |
| 20000 | .89  | .40 | .60 | 3200 | 9600 | 7200 | .3944 | .6056 | 2947 | 9050  | 6947 | 3200 | 8544  | 7200 | 1056  | 59.16  |
| 20000 | .90  | .40 | .60 | 3200 | 9600 | 7200 | .3950 | .6050 | 2970 | 9100  | 6970 | 3200 | 8640  | 7200 | 960   | 48.62  |
| 20000 | .91  | .40 | .60 | 3200 | 9600 | 7200 | .3955 | .6045 | 2993 | 9150  | 6993 | 3200 | 8736  | 7200 | 864   | 39.16  |
| 20000 | .92  | .40 | .60 | 3200 | 9600 | 7200 | .3960 | .6040 | 3016 | 9200  | 7016 | 3200 | 8832  | 7200 | 768   | 30.78  |
| 20000 | .93  | .40 | .60 | 3200 | 9600 | 7200 | .3965 | .6035 | 3039 | 9250  | 7039 | 3200 | 8928  | 7200 | 672   | 23.43  |
| 20000 | .94  | .40 | .60 | 3200 | 9600 | 7200 | .3970 | .6030 | 3062 | 9300  | 7062 | 3200 | 9024  | 7200 | 576   | 17.12  |
| 20000 | .95  | .40 | .60 | 3200 | 9600 | 7200 | .3975 | .6025 | 3085 | 9350  | 7085 | 3200 | 9120  | 7200 | 480   | 11.83  |
| 20000 | .96  | .40 | .60 | 3200 | 9600 | 7200 | .3980 | .6020 | 3108 | 9400  | 7108 | 3200 | 9216  | 7200 | 384   | 7.53   |
| 20000 | .97  | .40 | .60 | 3200 | 9600 | 7200 | .3985 | .6015 | 3131 | 9450  | 7131 | 3200 | 9312  | 7200 | 288   | 4.21   |
| 20000 | .98  | .40 | .60 | 3200 | 9600 | 7200 | .3990 | .6010 | 3154 | 9500  | 7154 | 3200 | 9408  | 7200 | 192   | 1.86   |
| 20000 | .99  | .40 | .60 | 3200 | 9600 | 7200 | .3995 | .6005 | 3177 | 9550  | 7177 | 3200 | 9504  | 7200 | 96    | .46    |
| 20000 | 1.00 | .40 | .60 | 3200 | 9600 | 7200 | .4000 | .6000 | 3200 | 9600  | 7200 | 3200 | 9600  | 7200 | 0     | .00    |
| 20000 | 1.01 | .40 | .60 | 3200 | 9600 | 7200 | .4005 | .5995 | 3223 | 9650  | 7223 | 3200 | 9696  | 7200 | -96   | .46    |
| 20000 | 1.02 | .40 | .60 | 3200 | 9600 | 7200 | .4010 | .5990 | 3246 | 9700  | 7246 | 3200 | 9792  | 7200 | -192  | 1.82   |
| 20000 | 1.03 | .40 | .60 | 3200 | 9600 | 7200 | .4014 | .5986 | 3269 | 9750  | 7269 | 3200 | 9888  | 7200 | -288  | 4.08   |
| 20000 | 1.04 | .40 | .60 | 3200 | 9600 | 7200 | .4019 | .5981 | 3292 | 9800  | 7292 | 3200 | 9984  | 7200 | -384  | 7.22   |
| 20000 | 1.05 | .40 | .60 | 3200 | 9600 | 7200 | .4023 | .5977 | 3315 | 9849  | 7315 | 3200 | 10080 | 7200 | -480  | 11.23  |
| 20000 | 1.06 | .40 | .60 | 3200 | 9600 | 7200 | .4028 | .5972 | 3338 | 9899  | 7338 | 3200 | 10176 | 7200 | -576  | 16.09  |
| 20000 | 1.07 | .40 | .60 | 3200 | 9600 | 7200 | .4033 | .5967 | 3361 | 9949  | 7361 | 3200 | 10272 | 7200 | -672  | 21.79  |
| 20000 | 1.08 | .40 | .60 | 3200 | 9600 | 7200 | .4037 | .5963 | 3385 | 9999  | 7385 | 3200 | 10368 | 7200 | -768  | 28.32  |
| 20000 | 1.09 | .40 | .60 | 3200 | 9600 | 7200 | .4041 | .5959 | 3408 | 10049 | 7408 | 3200 | 10464 | 7200 | -864  | 35.66  |
| 20000 | 1.10 | .40 | .60 | 3200 | 9600 | 7200 | .4046 | .5954 | 3431 | 10098 | 7431 | 3200 | 10560 | 7200 | -960  | 43.81  |
| 20000 | 1.11 | .40 | .60 | 3200 | 9600 | 7200 | .4050 | .5950 | 3454 | 10148 | 7454 | 3200 | 10656 | 7200 | -1056 | 52.75  |
| 20000 | 1.12 | .40 | .60 | 3200 | 9600 | 7200 | .4054 | .5946 | 3477 | 10198 | 7477 | 3200 | 10752 | 7200 | -1152 | 62.47  |
| 20000 | 1.13 | .40 | .60 | 3200 | 9600 | 7200 | .4059 | .5941 | 3500 | 10247 | 7500 | 3200 | 10848 | 7200 | -1248 | 72.97  |
| 20000 | 1.14 | .40 | .60 | 3200 | 9600 | 7200 | .4063 | .5937 | 3523 | 10297 | 7523 | 3200 | 10944 | 7200 | -1344 | 84.22  |

|       |      |     |     |      |      |      |       |       |      |       |      |      |       |      |       |        |
|-------|------|-----|-----|------|------|------|-------|-------|------|-------|------|------|-------|------|-------|--------|
| 20000 | 1.15 | .40 | .60 | 3200 | 9600 | 7200 | .4067 | .5933 | 3547 | 10347 | 7547 | 3200 | 11040 | 7200 | -1440 | 96.21  |
| 20000 | 1.16 | .40 | .60 | 3200 | 9600 | 7200 | .4071 | .5929 | 3570 | 10397 | 7570 | 3200 | 11136 | 7200 | -1536 | 108.95 |
| 20000 | 1.17 | .40 | .60 | 3200 | 9600 | 7200 | .4075 | .5925 | 3593 | 10446 | 7593 | 3200 | 11232 | 7200 | -1632 | 122.41 |
| 20000 | 1.18 | .40 | .60 | 3200 | 9600 | 7200 | .4080 | .5920 | 3616 | 10496 | 7616 | 3200 | 11328 | 7200 | -1728 | 136.59 |
| 20000 | 1.19 | .40 | .60 | 3200 | 9600 | 7200 | .4084 | .5916 | 3639 | 10545 | 7639 | 3200 | 11424 | 7200 | -1824 | 151.48 |
| 20000 | 1.20 | .40 | .60 | 3200 | 9600 | 7200 | .4088 | .5912 | 3662 | 10595 | 7662 | 3200 | 11520 | 7200 | -1920 | 167.06 |
| 20000 | .80  | .45 | .55 | 4050 | 9900 | 6050 | .4445 | .5555 | 3560 | 8899  | 5560 | 4050 | 7920  | 6050 | 1980  | 218.10 |
| 20000 | .81  | .45 | .55 | 4050 | 9900 | 6050 | .4448 | .5552 | 3585 | 8949  | 5585 | 4050 | 8019  | 6050 | 1881  | 195.73 |
| 20000 | .82  | .45 | .55 | 4050 | 9900 | 6050 | .4451 | .5549 | 3609 | 8999  | 5609 | 4050 | 8118  | 6050 | 1782  | 174.69 |
| 20000 | .83  | .45 | .55 | 4050 | 9900 | 6050 | .4454 | .5546 | 3634 | 9049  | 5634 | 4050 | 8217  | 6050 | 1683  | 154.95 |
| 20000 | .84  | .45 | .55 | 4050 | 9900 | 6050 | .4457 | .5543 | 3658 | 9099  | 5658 | 4050 | 8316  | 6050 | 1584  | 136.50 |
| 20000 | .85  | .45 | .55 | 4050 | 9900 | 6050 | .4460 | .5540 | 3683 | 9149  | 5683 | 4050 | 8415  | 6050 | 1485  | 119.31 |
| 20000 | .86  | .45 | .55 | 4050 | 9900 | 6050 | .4463 | .5537 | 3707 | 9200  | 5707 | 4050 | 8514  | 6050 | 1386  | 103.37 |
| 20000 | .87  | .45 | .55 | 4050 | 9900 | 6050 | .4466 | .5534 | 3732 | 9250  | 5732 | 4050 | 8613  | 6050 | 1287  | 88.65  |
| 20000 | .88  | .45 | .55 | 4050 | 9900 | 6050 | .4468 | .5532 | 3756 | 9300  | 5756 | 4050 | 8712  | 6050 | 1188  | 75.13  |
| 20000 | .89  | .45 | .55 | 4050 | 9900 | 6050 | .4471 | .5529 | 3781 | 9350  | 5781 | 4050 | 8811  | 6050 | 1089  | 62.79  |
| 20000 | .90  | .45 | .55 | 4050 | 9900 | 6050 | .4474 | .5526 | 3805 | 9400  | 5805 | 4050 | 8910  | 6050 | 990   | 51.61  |
| 20000 | .91  | .45 | .55 | 4050 | 9900 | 6050 | .4477 | .5523 | 3830 | 9450  | 5830 | 4050 | 9009  | 6050 | 891   | 41.59  |
| 20000 | .92  | .45 | .55 | 4050 | 9900 | 6050 | .4479 | .5521 | 3854 | 9500  | 5854 | 4050 | 9108  | 6050 | 792   | 32.68  |
| 20000 | .93  | .45 | .55 | 4050 | 9900 | 6050 | .4482 | .5518 | 3879 | 9550  | 5879 | 4050 | 9207  | 6050 | 693   | 24.89  |
| 20000 | .94  | .45 | .55 | 4050 | 9900 | 6050 | .4485 | .5515 | 3903 | 9600  | 5903 | 4050 | 9306  | 6050 | 594   | 18.19  |
| 20000 | .95  | .45 | .55 | 4050 | 9900 | 6050 | .4487 | .5513 | 3928 | 9650  | 5928 | 4050 | 9405  | 6050 | 495   | 12.57  |



|       |      |     |     |      |       |      |       |       |      |       |      |      |       |      |       |        |
|-------|------|-----|-----|------|-------|------|-------|-------|------|-------|------|------|-------|------|-------|--------|
| 20000 | .96  | .45 | .55 | 4050 | 9900  | 6050 | .4490 | .5510 | 3952 | 9700  | 5952 | 4050 | 9504  | 6050 | 396   | 8.00   |
| 20000 | .97  | .45 | .55 | 4050 | 9900  | 6050 | .4492 | .5508 | 3977 | 9750  | 5977 | 4050 | 9603  | 6050 | 297   | 4.48   |
| 20000 | .98  | .45 | .55 | 4050 | 9900  | 6050 | .4495 | .5505 | 4001 | 9800  | 6001 | 4050 | 9702  | 6050 | 198   | 1.98   |
| 20000 | .99  | .45 | .55 | 4050 | 9900  | 6050 | .4498 | .5502 | 4025 | 9850  | 6025 | 4050 | 9801  | 6050 | 99    | .49    |
| 20000 | 1.00 | .45 | .55 | 4050 | 9900  | 6050 | .4500 | .5500 | 4050 | 9900  | 6050 | 4050 | 9900  | 6050 | 0     | .00    |
| 20000 | 1.01 | .45 | .55 | 4050 | 9900  | 6050 | .4502 | .5498 | 4075 | 9950  | 6075 | 4050 | 9999  | 6050 | -99   | .49    |
| 20000 | 1.02 | .45 | .55 | 4050 | 9900  | 6050 | .4505 | .5495 | 4099 | 10000 | 6099 | 4050 | 10098 | 6050 | -198  | 1.94   |
| 20000 | 1.03 | .45 | .55 | 4050 | 9900  | 6050 | .4507 | .5493 | 4124 | 10050 | 6124 | 4050 | 10197 | 6050 | -297  | 4.34   |
| 20000 | 1.04 | .45 | .55 | 4050 | 9900  | 6050 | .4510 | .5490 | 4148 | 10100 | 6148 | 4050 | 10296 | 6050 | -396  | 7.69   |
| 20000 | 1.05 | .45 | .55 | 4050 | 9900  | 6050 | .4512 | .5488 | 4173 | 10150 | 6173 | 4050 | 10395 | 6050 | -495  | 11.95  |
| 20000 | 1.06 | .45 | .55 | 4050 | 9900  | 6050 | .4514 | .5486 | 4197 | 10200 | 6197 | 4050 | 10494 | 6050 | -594  | 17.12  |
| 20000 | 1.07 | .45 | .55 | 4050 | 9900  | 6050 | .4517 | .5483 | 4222 | 10250 | 6222 | 4050 | 10593 | 6050 | -693  | 23.19  |
| 20000 | 1.08 | .45 | .55 | 4050 | 9900  | 6050 | .4519 | .5481 | 4246 | 10300 | 6246 | 4050 | 10692 | 6050 | -792  | 30.15  |
| 20000 | 1.09 | .45 | .55 | 4050 | 9900  | 6050 | .4521 | .5479 | 4271 | 10350 | 6271 | 4050 | 10791 | 6050 | -891  | 37.97  |
| 20000 | 1.10 | .45 | .55 | 4050 | 9900  | 6050 | .4524 | .5476 | 4295 | 10400 | 6295 | 4050 | 10890 | 6050 | -990  | 46.65  |
| 20000 | 1.11 | .45 | .55 | 4050 | 9900  | 6050 | .4526 | .5474 | 4320 | 10450 | 6320 | 4050 | 10989 | 6050 | -1089 | 56.18  |
| 20000 | 1.12 | .45 | .55 | 4050 | 9900  | 6050 | .4528 | .5472 | 4344 | 10500 | 6344 | 4050 | 11088 | 6050 | -1188 | 66.54  |
| 20000 | 1.13 | .45 | .55 | 4050 | 9900  | 6050 | .4530 | .5470 | 4369 | 10550 | 6369 | 4050 | 11187 | 6050 | -1287 | 77.72  |
| 20000 | 1.14 | .45 | .55 | 4050 | 9900  | 6050 | .4532 | .5468 | 4393 | 10599 | 6393 | 4050 | 11286 | 6050 | -1386 | 89.72  |
| 20000 | 1.15 | .45 | .55 | 4050 | 9900  | 6050 | .4535 | .5465 | 4418 | 10649 | 6418 | 4050 | 11385 | 6050 | -1485 | 102.51 |
| 20000 | 1.16 | .45 | .55 | 4050 | 9900  | 6050 | .4537 | .5463 | 4442 | 10699 | 6442 | 4050 | 11484 | 6050 | -1584 | 116.09 |
| 20000 | 1.17 | .45 | .55 | 4050 | 9900  | 6050 | .4539 | .5461 | 4467 | 10749 | 6467 | 4050 | 11583 | 6050 | -1683 | 130.44 |
| 20000 | 1.18 | .45 | .55 | 4050 | 9900  | 6050 | .4541 | .5459 | 4491 | 10799 | 6491 | 4050 | 11682 | 6050 | -1782 | 145.57 |
| 20000 | 1.19 | .45 | .55 | 4050 | 9900  | 6050 | .4543 | .5457 | 4516 | 10849 | 6516 | 4050 | 11781 | 6050 | -1881 | 161.44 |
| 20000 | 1.20 | .45 | .55 | 4050 | 9900  | 6050 | .4545 | .5455 | 4540 | 10899 | 6540 | 4050 | 11880 | 6050 | -1980 | 178.07 |
| 20000 | .80  | .50 | .50 | 5000 | 10000 | 5000 | .5000 | .5000 | 4500 | 9000  | 4500 | 5000 | 8000  | 5000 | 2000  | 222.22 |

|       |      |     |     |      |       |      |       |       |      |       |      |      |       |      |      |        |
|-------|------|-----|-----|------|-------|------|-------|-------|------|-------|------|------|-------|------|------|--------|
| 20000 | .81  | .50 | .50 | 5000 | 10000 | 5000 | .5000 | .5000 | 4525 | 9050  | 4525 | 5000 | 8100  | 5000 | 1900 | 199.45 |
| 20000 | .82  | .50 | .50 | 5000 | 10000 | 5000 | .5000 | .5000 | 4550 | 9100  | 4550 | 5000 | 8200  | 5000 | 1800 | 178.02 |
| 20000 | .83  | .50 | .50 | 5000 | 10000 | 5000 | .5000 | .5000 | 4575 | 9150  | 4575 | 5000 | 8300  | 5000 | 1700 | 157.92 |
| 20000 | .84  | .50 | .50 | 5000 | 10000 | 5000 | .5000 | .5000 | 4600 | 9200  | 4600 | 5000 | 8400  | 5000 | 1600 | 139.13 |
| 20000 | .85  | .50 | .50 | 5000 | 10000 | 5000 | .5000 | .5000 | 4625 | 9250  | 4625 | 5000 | 8500  | 5000 | 1500 | 121.62 |
| 20000 | .86  | .50 | .50 | 5000 | 10000 | 5000 | .5000 | .5000 | 4650 | 9300  | 4650 | 5000 | 8600  | 5000 | 1400 | 105.38 |
| 20000 | .87  | .50 | .50 | 5000 | 10000 | 5000 | .5000 | .5000 | 4675 | 9350  | 4675 | 5000 | 8700  | 5000 | 1300 | 90.37  |
| 20000 | .88  | .50 | .50 | 5000 | 10000 | 5000 | .5000 | .5000 | 4700 | 9400  | 4700 | 5000 | 8800  | 5000 | 1200 | 76.60  |
| 20000 | .89  | .50 | .50 | 5000 | 10000 | 5000 | .5000 | .5000 | 4725 | 9450  | 4725 | 5000 | 8900  | 5000 | 1100 | 64.02  |
| 20000 | .90  | .50 | .50 | 5000 | 10000 | 5000 | .5000 | .5000 | 4750 | 9500  | 4750 | 5000 | 9000  | 5000 | 1000 | 52.63  |
| 20000 | .91  | .50 | .50 | 5000 | 10000 | 5000 | .5000 | .5000 | 4775 | 9550  | 4775 | 5000 | 9100  | 5000 | 900  | 42.41  |
| 20000 | .92  | .50 | .50 | 5000 | 10000 | 5000 | .5000 | .5000 | 4800 | 9600  | 4800 | 5000 | 9200  | 5000 | 800  | 33.33  |
| 20000 | .93  | .50 | .50 | 5000 | 10000 | 5000 | .5000 | .5000 | 4825 | 9650  | 4825 | 5000 | 9300  | 5000 | 700  | 25.39  |
| 20000 | .94  | .50 | .50 | 5000 | 10000 | 5000 | .5000 | .5000 | 4850 | 9700  | 4850 | 5000 | 9400  | 5000 | 600  | 18.56  |
| 20000 | .95  | .50 | .50 | 5000 | 10000 | 5000 | .5000 | .5000 | 4875 | 9750  | 4875 | 5000 | 9500  | 5000 | 500  | 12.82  |
| 20000 | .96  | .50 | .50 | 5000 | 10000 | 5000 | .5000 | .5000 | 4900 | 9800  | 4900 | 5000 | 9600  | 5000 | 400  | 8.16   |
| 20000 | .97  | .50 | .50 | 5000 | 10000 | 5000 | .5000 | .5000 | 4925 | 9850  | 4925 | 5000 | 9700  | 5000 | 300  | 4.57   |
| 20000 | .98  | .50 | .50 | 5000 | 10000 | 5000 | .5000 | .5000 | 4950 | 9900  | 4950 | 5000 | 9800  | 5000 | 200  | 2.02   |
| 20000 | .99  | .50 | .50 | 5000 | 10000 | 5000 | .5000 | .5000 | 4975 | 9950  | 4975 | 5000 | 9900  | 5000 | 100  | .50    |
| 20000 | 1.00 | .50 | .50 | 5000 | 10000 | 5000 | .5000 | .5000 | 5000 | 10000 | 5000 | 5000 | 10000 | 5000 | 0    | .00    |
| 20000 | 1.01 | .50 | .50 | 5000 | 10000 | 5000 | .5000 | .5000 | 5025 | 10050 | 5025 | 5000 | 10100 | 5000 | -100 | .50    |
| 20000 | 1.02 | .50 | .50 | 5000 | 10000 | 5000 | .5000 | .5000 | 5050 | 10100 | 5050 | 5000 | 10200 | 5000 | -200 | 1.98   |
| 20000 | 1.03 | .50 | .50 | 5000 | 10000 | 5000 | .5000 | .5000 | 5075 | 10150 | 5075 | 5000 | 10300 | 5000 | -300 | 4.43   |
| 20000 | 1.04 | .50 | .50 | 5000 | 10000 | 5000 | .5000 | .5000 | 5100 | 10200 | 5100 | 5000 | 10400 | 5000 | -400 | 7.84   |
| 20000 | 1.05 | .50 | .50 | 5000 | 10000 | 5000 | .5000 | .5000 | 5125 | 10250 | 5125 | 5000 | 10500 | 5000 | -500 | 12.20  |
| 20000 | 1.06 | .50 | .50 | 5000 | 10000 | 5000 | .5000 | .5000 | 5150 | 10300 | 5150 | 5000 | 10600 | 5000 | -600 | 17.48  |
| 20000 | 1.07 | .50 | .50 | 5000 | 10000 | 5000 | .5000 | .5000 | 5175 | 10350 | 5175 | 5000 | 10700 | 5000 | -700 | 23.67  |

|       |      |     |     |      |       |      |       |       |      |       |      |      |       |      |       |        |
|-------|------|-----|-----|------|-------|------|-------|-------|------|-------|------|------|-------|------|-------|--------|
| 20000 | 1.08 | .50 | .50 | 5000 | 10000 | 5000 | .5000 | .5000 | 5200 | 10400 | 5200 | 5000 | 10800 | 5000 | -800  | 30.77  |
| 20000 | 1.09 | .50 | .50 | 5000 | 10000 | 5000 | .5000 | .5000 | 5225 | 10450 | 5225 | 5000 | 10900 | 5000 | -900  | 38.76  |
| 20000 | 1.10 | .50 | .50 | 5000 | 10000 | 5000 | .5000 | .5000 | 5250 | 10500 | 5250 | 5000 | 11000 | 5000 | -1000 | 47.62  |
| 20000 | 1.11 | .50 | .50 | 5000 | 10000 | 5000 | .5000 | .5000 | 5275 | 10550 | 5275 | 5000 | 11100 | 5000 | -1100 | 57.35  |
| 20000 | 1.12 | .50 | .50 | 5000 | 10000 | 5000 | .5000 | .5000 | 5300 | 10600 | 5300 | 5000 | 11200 | 5000 | -1200 | 67.92  |
| 20000 | 1.13 | .50 | .50 | 5000 | 10000 | 5000 | .5000 | .5000 | 5325 | 10650 | 5325 | 5000 | 11300 | 5000 | -1300 | 79.34  |
| 20000 | 1.14 | .50 | .50 | 5000 | 10000 | 5000 | .5000 | .5000 | 5350 | 10700 | 5350 | 5000 | 11400 | 5000 | -1400 | 91.59  |
| 20000 | 1.15 | .50 | .50 | 5000 | 10000 | 5000 | .5000 | .5000 | 5375 | 10750 | 5375 | 5000 | 11500 | 5000 | -1500 | 104.65 |
| 20000 | 1.16 | .50 | .50 | 5000 | 10000 | 5000 | .5000 | .5000 | 5400 | 10800 | 5400 | 5000 | 11600 | 5000 | -1600 | 118.52 |
| 20000 | 1.17 | .50 | .50 | 5000 | 10000 | 5000 | .5000 | .5000 | 5425 | 10850 | 5425 | 5000 | 11700 | 5000 | -1700 | 133.18 |
| 20000 | 1.18 | .50 | .50 | 5000 | 10000 | 5000 | .5000 | .5000 | 5450 | 10900 | 5450 | 5000 | 11800 | 5000 | -1800 | 148.62 |
| 20000 | 1.19 | .50 | .50 | 5000 | 10000 | 5000 | .5000 | .5000 | 5475 | 10950 | 5475 | 5000 | 11900 | 5000 | -1900 | 164.84 |
| 20000 | 1.20 | .50 | .50 | 5000 | 10000 | 5000 | .5000 | .5000 | 5500 | 11000 | 5500 | 5000 | 12000 | 5000 | -2000 | 181.82 |
| 20000 | .80  | .55 | .45 | 6050 | 9900  | 4050 | .5555 | .4445 | 5560 | 8899  | 3560 | 6050 | 7920  | 4050 | 1980  | 218.10 |
| 20000 | .81  | .55 | .45 | 6050 | 9900  | 4050 | .5552 | .4448 | 5585 | 8949  | 3585 | 6050 | 8019  | 4050 | 1881  | 195.73 |
| 20000 | .82  | .55 | .45 | 6050 | 9900  | 4050 | .5549 | .4451 | 5609 | 8999  | 3609 | 6050 | 8118  | 4050 | 1782  | 174.69 |
| 20000 | .83  | .55 | .45 | 6050 | 9900  | 4050 | .5546 | .4454 | 5634 | 9049  | 3634 | 6050 | 8217  | 4050 | 1683  | 154.95 |
| 20000 | .84  | .55 | .45 | 6050 | 9900  | 4050 | .5543 | .4457 | 5658 | 9099  | 3658 | 6050 | 8316  | 4050 | 1584  | 136.50 |
| 20000 | .85  | .55 | .45 | 6050 | 9900  | 4050 | .5540 | .4460 | 5683 | 9149  | 3683 | 6050 | 8415  | 4050 | 1485  | 119.31 |
| 20000 | .86  | .55 | .45 | 6050 | 9900  | 4050 | .5537 | .4463 | 5707 | 9200  | 3707 | 6050 | 8514  | 4050 | 1386  | 103.37 |
| 20000 | .87  | .55 | .45 | 6050 | 9900  | 4050 | .5534 | .4466 | 5732 | 9250  | 3732 | 6050 | 8613  | 4050 | 1287  | 88.65  |

|       |      |     |     |      |      |      |       |       |      |       |      |      |       |      |       |            |
|-------|------|-----|-----|------|------|------|-------|-------|------|-------|------|------|-------|------|-------|------------|
| 20000 | .88  | .55 | .45 | 6050 | 9900 | 4050 | .5532 | .4468 | 5756 | 9300  | 3756 | 6050 | 8712  | 4050 | 1188  | 75.13      |
| 20000 | .89  | .55 | .45 | 6050 | 9900 | 4050 | .5529 | .4471 | 5781 | 9350  | 3781 | 6050 | 8811  | 4050 | 1089  | 62.79      |
| 20000 | .90  | .55 | .45 | 6050 | 9900 | 4050 | .5526 | .4474 | 5805 | 9400  | 3805 | 6050 | 8910  | 4050 | 990   | 51.61      |
| 20000 | .91  | .55 | .45 | 6050 | 9900 | 4050 | .5523 | .4477 | 5830 | 9450  | 3830 | 6050 | 9009  | 4050 | 891   | 41.59      |
| 20000 | .92  | .55 | .45 | 6050 | 9900 | 4050 | .5521 | .4479 | 5854 | 9500  | 3854 | 6050 | 9108  | 4050 | 792   | 32.68      |
| 20000 | .93  | .55 | .45 | 6050 | 9900 | 4050 | .5518 | .4482 | 5879 | 9550  | 3879 | 6050 | 9207  | 4050 | 693   | 24.89      |
| 20000 | .94  | .55 | .45 | 6050 | 9900 | 4050 | .5515 | .4485 | 5903 | 9600  | 3903 | 6050 | 9306  | 4050 | 594   | 18.19      |
| 20000 | .95  | .55 | .45 | 6050 | 9900 | 4050 | .5513 | .4487 | 5928 | 9650  | 3928 | 6050 | 9405  | 4050 | 495   | 12.57      |
| 20000 | .96  | .55 | .45 | 6050 | 9900 | 4050 | .5510 | .4490 | 5952 | 9700  | 3952 | 6050 | 9504  | 4050 | 396   | 8.00       |
| 20000 | .97  | .55 | .45 | 6050 | 9900 | 4050 | .5508 | .4492 | 5977 | 9750  | 3977 | 6050 | 9603  | 4050 | 297   | 4.48       |
| 20000 | .98  | .55 | .45 | 6050 | 9900 | 4050 | .5505 | .4495 | 6001 | 9800  | 4001 | 6050 | 9702  | 4050 | 198   | 1.98       |
| 20000 | .99  | .55 | .45 | 6050 | 9900 | 4050 | .5502 | .4498 | 6025 | 9850  | 4025 | 6050 | 9801  | 4050 | 99    | .49        |
| 20000 | 1.00 | .55 | .45 | 6050 | 9900 | 4050 | .5500 | .4500 | 6050 | 9900  | 4050 | 6050 | 9900  | 4050 | 0     | .00        |
| 20000 | 1.01 | .55 | .45 | 6050 | 9900 | 4050 | .5498 | .4502 | 6075 | 9950  | 4075 | 6050 | 9999  | 4050 | -99   | .49        |
| 20000 | 1.02 | .55 | .45 | 6050 | 9900 | 4050 | .5495 | .4505 | 6099 | 10000 | 4099 | 6050 | 10098 | 4050 | -198  | 1.94       |
| 20000 | 1.03 | .55 | .45 | 6050 | 9900 | 4050 | .5493 | .4507 | 6124 | 10050 | 4124 | 6050 | 10197 | 4050 | -297  | 4.34       |
| 20000 | 1.04 | .55 | .45 | 6050 | 9900 | 4050 | .5490 | .4510 | 6148 | 10100 | 4148 | 6050 | 10296 | 4050 | -396  | 7.69       |
| 20000 | 1.05 | .55 | .45 | 6050 | 9900 | 4050 | .5488 | .4512 | 6173 | 10150 | 4173 | 6050 | 10395 | 4050 | -495  | 11.95      |
| 20000 | 1.06 | .55 | .45 | 6050 | 9900 | 4050 | .5486 | .4514 | 6197 | 10200 | 4197 | 6050 | 10494 | 4050 | -594  | 17.12      |
| 20000 | 1.07 | .55 | .45 | 6050 | 9900 | 4050 | .5483 | .4517 | 6222 | 10250 | 4222 | 6050 | 10593 | 4050 | -693  | 23.19      |
| 20000 | 1.08 | .55 | .45 | 6050 | 9900 | 4050 | .5481 | .4519 | 6246 | 10300 | 4246 | 6050 | 10692 | 4050 | -792  | 30.15      |
| 20000 | 1.09 | .55 | .45 | 6050 | 9900 | 4050 | .5479 | .4521 | 6271 | 10350 | 4271 | 6050 | 10791 | 4050 | -891  | 37.97      |
| 20000 | 1.10 | .55 | .45 | 6050 | 9900 | 4050 | .5476 | .4524 | 6295 | 10400 | 4295 | 6050 | 10890 | 4050 | -990  | 46.65      |
| 20000 | 1.11 | .55 | .45 | 6050 | 9900 | 4050 | .5474 | .4526 | 6320 | 10450 | 4320 | 6050 | 10989 | 4050 | -1089 | 56.18      |
| 20000 | 1.12 | .55 | .45 | 6050 | 9900 | 4050 | .5472 | .4528 | 6344 | 10500 | 4344 | 6050 | 11088 | 4050 | -1188 | 66.54      |
| 20000 | 1.13 | .55 | .45 | 6050 | 9900 | 4050 | .5470 | .4530 | 6369 | 10550 | 4369 | 6050 | 11187 | 4050 | -1287 | 77.72      |
| 20000 | 1.14 | .55 | .45 | 6050 | 9900 | 4050 | .5468 | .4532 | 6393 | 10599 | 4393 | 6050 | 11286 | 4050 | -1386 | 89.72      |
| 20000 | 1.15 | .55 | .45 | 6050 | 9900 | 4050 | .5465 | .4535 | 6418 | 10649 | 4418 | 6050 | 11385 | 4050 | -1485 | 102.5<br>1 |
| 20000 | 1.16 | .55 | .45 | 6050 | 9900 | 4050 | .5463 | .4537 | 6442 | 10699 | 4442 | 6050 | 11484 | 4050 | -1584 | 116.0<br>9 |
| 20000 | 1.17 | .55 | .45 | 6050 | 9900 | 4050 | .5461 | .4539 | 6467 | 10749 | 4467 | 6050 | 11583 | 4050 | -1683 | 130.4<br>4 |

|       |      |     |     |      |      |      |       |       |      |       |      |      |       |      |       |        |
|-------|------|-----|-----|------|------|------|-------|-------|------|-------|------|------|-------|------|-------|--------|
| 20000 | 1.18 | .55 | .45 | 6050 | 9900 | 4050 | .5459 | .4541 | 6491 | 10799 | 4491 | 6050 | 11682 | 4050 | -1782 | 145.57 |
| 20000 | 1.19 | .55 | .45 | 6050 | 9900 | 4050 | .5457 | .4543 | 6516 | 10849 | 4516 | 6050 | 11781 | 4050 | -1881 | 161.44 |
| 20000 | 1.20 | .55 | .45 | 6050 | 9900 | 4050 | .5455 | .4545 | 6540 | 10899 | 4540 | 6050 | 11880 | 4050 | -1980 | 178.07 |
| 20000 | .80  | .60 | .40 | 7200 | 9600 | 3200 | .6106 | .3894 | 6741 | 8598  | 2741 | 7200 | 7680  | 3200 | 1920  | 205.91 |
| 20000 | .81  | .60 | .40 | 7200 | 9600 | 3200 | .6100 | .3900 | 6764 | 8648  | 2764 | 7200 | 7776  | 3200 | 1824  | 184.75 |
| 20000 | .82  | .60 | .40 | 7200 | 9600 | 3200 | .6095 | .3905 | 6787 | 8698  | 2787 | 7200 | 7872  | 3200 | 1728  | 164.84 |
| 20000 | .83  | .60 | .40 | 7200 | 9600 | 3200 | .6089 | .3911 | 6810 | 8748  | 2810 | 7200 | 7968  | 3200 | 1632  | 146.18 |
| 20000 | .84  | .60 | .40 | 7200 | 9600 | 3200 | .6083 | .3917 | 6833 | 8799  | 2833 | 7200 | 8064  | 3200 | 1536  | 128.75 |
| 20000 | .85  | .60 | .40 | 7200 | 9600 | 3200 | .6078 | .3922 | 6856 | 8849  | 2856 | 7200 | 8160  | 3200 | 1440  | 112.51 |
| 20000 | .86  | .60 | .40 | 7200 | 9600 | 3200 | .6072 | .3928 | 6878 | 8899  | 2878 | 7200 | 8256  | 3200 | 1344  | 97.45  |
| 20000 | .87  | .60 | .40 | 7200 | 9600 | 3200 | .6067 | .3933 | 6901 | 8949  | 2901 | 7200 | 8352  | 3200 | 1248  | 83.55  |
| 20000 | .88  | .60 | .40 | 7200 | 9600 | 3200 | .6061 | .3939 | 6924 | 9000  | 2924 | 7200 | 8448  | 3200 | 1152  | 70.79  |
| 20000 | .89  | .60 | .40 | 7200 | 9600 | 3200 | .6056 | .3944 | 6947 | 9050  | 2947 | 7200 | 8544  | 3200 | 1056  | 59.16  |
| 20000 | .90  | .60 | .40 | 7200 | 9600 | 3200 | .6050 | .3950 | 6970 | 9100  | 2970 | 7200 | 8640  | 3200 | 960   | 48.62  |
| 20000 | .91  | .60 | .40 | 7200 | 9600 | 3200 | .6045 | .3955 | 6993 | 9150  | 2993 | 7200 | 8736  | 3200 | 864   | 39.16  |
| 20000 | .92  | .60 | .40 | 7200 | 9600 | 3200 | .6040 | .3960 | 7016 | 9200  | 3016 | 7200 | 8832  | 3200 | 768   | 30.78  |
| 20000 | .93  | .60 | .40 | 7200 | 9600 | 3200 | .6035 | .3965 | 7039 | 9250  | 3039 | 7200 | 8928  | 3200 | 672   | 23.43  |
| 20000 | .94  | .60 | .40 | 7200 | 9600 | 3200 | .6030 | .3970 | 7062 | 9300  | 3062 | 7200 | 9024  | 3200 | 576   | 17.12  |
| 20000 | .95  | .60 | .40 | 7200 | 9600 | 3200 | .6025 | .3975 | 7085 | 9350  | 3085 | 7200 | 9120  | 3200 | 480   | 11.83  |
| 20000 | .96  | .60 | .40 | 7200 | 9600 | 3200 | .6020 | .3980 | 7108 | 9400  | 3108 | 7200 | 9216  | 3200 | 384   | 7.53   |
| 20000 | .97  | .60 | .40 | 7200 | 9600 | 3200 | .6015 | .3985 | 7131 | 9450  | 3131 | 7200 | 9312  | 3200 | 288   | 4.21   |
| 20000 | .98  | .60 | .40 | 7200 | 9600 | 3200 | .6010 | .3990 | 7154 | 9500  | 3154 | 7200 | 9408  | 3200 | 192   | 1.86   |
| 20000 | .99  | .60 | .40 | 7200 | 9600 | 3200 | .6005 | .3995 | 7177 | 9550  | 3177 | 7200 | 9504  | 3200 | 96    | .46    |
| 20000 | 1.00 | .60 | .40 | 7200 | 9600 | 3200 | .6000 | .4000 | 7200 | 9600  | 3200 | 7200 | 9600  | 3200 | 0     | .00    |

|       |      |     |     |      |      |      |       |       |      |       |      |      |       |      |       |        |
|-------|------|-----|-----|------|------|------|-------|-------|------|-------|------|------|-------|------|-------|--------|
| 20000 | 1.01 | .60 | .40 | 7200 | 9600 | 3200 | .5995 | .4005 | 7223 | 9650  | 3223 | 7200 | 9696  | 3200 | -96   | .46    |
| 20000 | 1.02 | .60 | .40 | 7200 | 9600 | 3200 | .5990 | .4010 | 7246 | 9700  | 3246 | 7200 | 9792  | 3200 | -192  | 1.82   |
| 20000 | 1.03 | .60 | .40 | 7200 | 9600 | 3200 | .5986 | .4014 | 7269 | 9750  | 3269 | 7200 | 9888  | 3200 | -288  | 4.08   |
| 20000 | 1.04 | .60 | .40 | 7200 | 9600 | 3200 | .5981 | .4019 | 7292 | 9800  | 3292 | 7200 | 9984  | 3200 | -384  | 7.22   |
| 20000 | 1.05 | .60 | .40 | 7200 | 9600 | 3200 | .5977 | .4023 | 7315 | 9849  | 3315 | 7200 | 10080 | 3200 | -480  | 11.23  |
| 20000 | 1.06 | .60 | .40 | 7200 | 9600 | 3200 | .5972 | .4028 | 7338 | 9899  | 3338 | 7200 | 10176 | 3200 | -576  | 16.09  |
| 20000 | 1.07 | .60 | .40 | 7200 | 9600 | 3200 | .5967 | .4033 | 7361 | 9949  | 3361 | 7200 | 10272 | 3200 | -672  | 21.79  |
| 20000 | 1.08 | .60 | .40 | 7200 | 9600 | 3200 | .5963 | .4037 | 7385 | 9999  | 3385 | 7200 | 10368 | 3200 | -768  | 28.32  |
| 20000 | 1.09 | .60 | .40 | 7200 | 9600 | 3200 | .5959 | .4041 | 7408 | 10049 | 3408 | 7200 | 10464 | 3200 | -864  | 35.66  |
| 20000 | 1.10 | .60 | .40 | 7200 | 9600 | 3200 | .5954 | .4046 | 7431 | 10098 | 3431 | 7200 | 10560 | 3200 | -960  | 43.81  |
| 20000 | 1.11 | .60 | .40 | 7200 | 9600 | 3200 | .5950 | .4050 | 7454 | 10148 | 3454 | 7200 | 10656 | 3200 | -1056 | 52.75  |
| 20000 | 1.12 | .60 | .40 | 7200 | 9600 | 3200 | .5946 | .4054 | 7477 | 10198 | 3477 | 7200 | 10752 | 3200 | -1152 | 62.47  |
| 20000 | 1.13 | .60 | .40 | 7200 | 9600 | 3200 | .5941 | .4059 | 7500 | 10247 | 3500 | 7200 | 10848 | 3200 | -1248 | 72.97  |
| 20000 | 1.14 | .60 | .40 | 7200 | 9600 | 3200 | .5937 | .4063 | 7523 | 10297 | 3523 | 7200 | 10944 | 3200 | -1344 | 84.22  |
| 20000 | 1.15 | .60 | .40 | 7200 | 9600 | 3200 | .5933 | .4067 | 7547 | 10347 | 3547 | 7200 | 11040 | 3200 | -1440 | 96.21  |
| 20000 | 1.16 | .60 | .40 | 7200 | 9600 | 3200 | .5929 | .4071 | 7570 | 10397 | 3570 | 7200 | 11136 | 3200 | -1536 | 108.95 |
| 20000 | 1.17 | .60 | .40 | 7200 | 9600 | 3200 | .5925 | .4075 | 7593 | 10446 | 3593 | 7200 | 11232 | 3200 | -1632 | 122.41 |
| 20000 | 1.18 | .60 | .40 | 7200 | 9600 | 3200 | .5920 | .4080 | 7616 | 10496 | 3616 | 7200 | 11328 | 3200 | -1728 | 136.59 |
| 20000 | 1.19 | .60 | .40 | 7200 | 9600 | 3200 | .5916 | .4084 | 7639 | 10545 | 3639 | 7200 | 11424 | 3200 | -1824 | 151.48 |
| 20000 | 1.20 | .60 | .40 | 7200 | 9600 | 3200 | .5912 | .4088 | 7662 | 10595 | 3662 | 7200 | 11520 | 3200 | -1920 | 167.06 |
| 20000 | .80  | .65 | .35 | 8450 | 9100 | 2450 | .6650 | .3350 | 8040 | 8100  | 2040 | 8450 | 7280  | 2450 | 1820  | 186.28 |
| 20000 | .81  | .65 | .35 | 8450 | 9100 | 2450 | .6642 | .3358 | 8060 | 8150  | 2060 | 8450 | 7371  | 2450 | 1729  | 167.05 |
| 20000 | .82  | .65 | .35 | 8450 | 9100 | 2450 | .6634 | .3366 | 8081 | 8201  | 2081 | 8450 | 7462  | 2450 | 1638  | 148.99 |
| 20000 | .83  | .65 | .35 | 8450 | 9100 | 2450 | .6626 | .3374 | 8101 | 8251  | 2101 | 8450 | 7553  | 2450 | 1547  | 132.07 |

|       |      |     |     |      |      |      |       |       |      |      |      |      |       |      |       |        |
|-------|------|-----|-----|------|------|------|-------|-------|------|------|------|------|-------|------|-------|--------|
| 20000 | .84  | .65 | .35 | 8450 | 9100 | 2450 | .6618 | .3382 | 8121 | 8301 | 2121 | 8450 | 7644  | 2450 | 1456  | 116.27 |
| 20000 | .85  | .65 | .35 | 8450 | 9100 | 2450 | .6610 | .3390 | 8142 | 8352 | 2142 | 8450 | 7735  | 2450 | 1365  | 101.57 |
| 20000 | .86  | .65 | .35 | 8450 | 9100 | 2450 | .6602 | .3398 | 8162 | 8402 | 2162 | 8450 | 7826  | 2450 | 1274  | 87.94  |
| 20000 | .87  | .65 | .35 | 8450 | 9100 | 2450 | .6594 | .3406 | 8183 | 8452 | 2183 | 8450 | 7917  | 2450 | 1183  | 75.37  |
| 20000 | .88  | .65 | .35 | 8450 | 9100 | 2450 | .6587 | .3413 | 8203 | 8502 | 2203 | 8450 | 8008  | 2450 | 1092  | 63.84  |
| 20000 | .89  | .65 | .35 | 8450 | 9100 | 2450 | .6579 | .3421 | 8223 | 8552 | 2223 | 8450 | 8099  | 2450 | 1001  | 53.33  |
| 20000 | .90  | .65 | .35 | 8450 | 9100 | 2450 | .6572 | .3428 | 8244 | 8602 | 2244 | 8450 | 8190  | 2450 | 910   | 43.81  |
| 20000 | .91  | .65 | .35 | 8450 | 9100 | 2450 | .6564 | .3436 | 8264 | 8652 | 2264 | 8450 | 8281  | 2450 | 819   | 35.28  |
| 20000 | .92  | .65 | .35 | 8450 | 9100 | 2450 | .6557 | .3443 | 8285 | 8702 | 2285 | 8450 | 8372  | 2450 | 728   | 27.72  |
| 20000 | .93  | .65 | .35 | 8450 | 9100 | 2450 | .6549 | .3451 | 8306 | 8752 | 2306 | 8450 | 8463  | 2450 | 637   | 21.10  |
| 20000 | .94  | .65 | .35 | 8450 | 9100 | 2450 | .6542 | .3458 | 8326 | 8802 | 2326 | 8450 | 8554  | 2450 | 546   | 15.41  |
| 20000 | .95  | .65 | .35 | 8450 | 9100 | 2450 | .6535 | .3465 | 8347 | 8852 | 2347 | 8450 | 8645  | 2450 | 455   | 10.64  |
| 20000 | .96  | .65 | .35 | 8450 | 9100 | 2450 | .6528 | .3472 | 8367 | 8901 | 2367 | 8450 | 8736  | 2450 | 364   | 6.77   |
| 20000 | .97  | .65 | .35 | 8450 | 9100 | 2450 | .6521 | .3479 | 8388 | 8951 | 2388 | 8450 | 8827  | 2450 | 273   | 3.79   |
| 20000 | .98  | .65 | .35 | 8450 | 9100 | 2450 | .6514 | .3486 | 8409 | 9001 | 2409 | 8450 | 8918  | 2450 | 182   | 1.67   |
| 20000 | .99  | .65 | .35 | 8450 | 9100 | 2450 | .6507 | .3493 | 8429 | 9050 | 2429 | 8450 | 9009  | 2450 | 91    | .42    |
| 20000 | 1.00 | .65 | .35 | 8450 | 9100 | 2450 | .6500 | .3500 | 8450 | 9100 | 2450 | 8450 | 9100  | 2450 | 0     | .00    |
| 20000 | 1.01 | .65 | .35 | 8450 | 9100 | 2450 | .6493 | .3507 | 8471 | 9150 | 2471 | 8450 | 9191  | 2450 | -91   | .41    |
| 20000 | 1.02 | .65 | .35 | 8450 | 9100 | 2450 | .6486 | .3514 | 8491 | 9199 | 2491 | 8450 | 9282  | 2450 | -182  | 1.64   |
| 20000 | 1.03 | .65 | .35 | 8450 | 9100 | 2450 | .6480 | .3520 | 8512 | 9249 | 2512 | 8450 | 9373  | 2450 | -273  | 3.67   |
| 20000 | 1.04 | .65 | .35 | 8450 | 9100 | 2450 | .6473 | .3527 | 8533 | 9298 | 2533 | 8450 | 9464  | 2450 | -364  | 6.48   |
| 20000 | 1.05 | .65 | .35 | 8450 | 9100 | 2450 | .6467 | .3533 | 8554 | 9348 | 2554 | 8450 | 9555  | 2450 | -455  | 10.08  |
| 20000 | 1.06 | .65 | .35 | 8450 | 9100 | 2450 | .6460 | .3540 | 8575 | 9397 | 2575 | 8450 | 9646  | 2450 | -546  | 14.44  |
| 20000 | 1.07 | .65 | .35 | 8450 | 9100 | 2450 | .6454 | .3546 | 8595 | 9446 | 2595 | 8450 | 9737  | 2450 | -637  | 19.55  |
| 20000 | 1.08 | .65 | .35 | 8450 | 9100 | 2450 | .6447 | .3553 | 8616 | 9496 | 2616 | 8450 | 9828  | 2450 | -728  | 25.40  |
| 20000 | 1.09 | .65 | .35 | 8450 | 9100 | 2450 | .6441 | .3559 | 8637 | 9545 | 2637 | 8450 | 9919  | 2450 | -819  | 31.98  |
| 20000 | 1.10 | .65 | .35 | 8450 | 9100 | 2450 | .6435 | .3565 | 8658 | 9594 | 2658 | 8450 | 10010 | 2450 | -910  | 39.28  |
| 20000 | 1.11 | .65 | .35 | 8450 | 9100 | 2450 | .6429 | .3571 | 8679 | 9643 | 2679 | 8450 | 10101 | 2450 | -1001 | 47.29  |
| 20000 | 1.12 | .65 | .35 | 8450 | 9100 | 2450 | .6422 | .3578 | 8700 | 9693 | 2700 | 8450 | 10192 | 2450 | -1092 | 55.99  |
| 20000 | 1.13 | .65 | .35 | 8450 | 9100 | 2450 | .6416 | .3584 | 8721 | 9742 | 2721 | 8450 | 10283 | 2450 | -1183 | 65.39  |
| 20000 | 1.14 | .65 | .35 | 8450 | 9100 | 2450 | .6410 | .3590 | 8742 | 9791 | 2742 | 8450 | 10374 | 2450 | -1274 | 75.46  |

|       |      |     |     |      |      |      |       |       |      |       |      |      |       |      |       |        |
|-------|------|-----|-----|------|------|------|-------|-------|------|-------|------|------|-------|------|-------|--------|
| 20000 | 1.15 | .65 | .35 | 8450 | 9100 | 2450 | .6404 | .3596 | 8762 | 9840  | 2762 | 8450 | 10465 | 2450 | -1365 | 86.19  |
| 20000 | 1.16 | .65 | .35 | 8450 | 9100 | 2450 | .6398 | .3602 | 8783 | 9889  | 2783 | 8450 | 10556 | 2450 | -1456 | 97.59  |
| 20000 | 1.17 | .65 | .35 | 8450 | 9100 | 2450 | .6392 | .3608 | 8804 | 9938  | 2804 | 8450 | 10647 | 2450 | -1547 | 109.63 |
| 20000 | 1.18 | .65 | .35 | 8450 | 9100 | 2450 | .6386 | .3614 | 8825 | 9987  | 2825 | 8450 | 10738 | 2450 | -1638 | 122.31 |
| 20000 | 1.19 | .65 | .35 | 8450 | 9100 | 2450 | .6381 | .3619 | 8846 | 10036 | 2846 | 8450 | 10829 | 2450 | -1729 | 135.62 |
| 20000 | 1.20 | .65 | .35 | 8450 | 9100 | 2450 | .6375 | .3625 | 8867 | 10085 | 2867 | 8450 | 10920 | 2450 | -1820 | 149.55 |
| 20000 | .80  | .70 | .30 | 9800 | 8400 | 1800 | .7183 | .2817 | 9453 | 7413  | 1453 | 9800 | 6720  | 1800 | 1680  | 160.22 |
| 20000 | .81  | .70 | .30 | 9800 | 8400 | 1800 | .7173 | .2827 | 9470 | 7463  | 1470 | 9800 | 6804  | 1800 | 1596  | 143.60 |
| 20000 | .82  | .70 | .30 | 9800 | 8400 | 1800 | .7164 | .2836 | 9487 | 7513  | 1487 | 9800 | 6888  | 1800 | 1512  | 128.00 |
| 20000 | .83  | .70 | .30 | 9800 | 8400 | 1800 | .7154 | .2846 | 9505 | 7563  | 1505 | 9800 | 6972  | 1800 | 1428  | 113.40 |
| 20000 | .84  | .70 | .30 | 9800 | 8400 | 1800 | .7144 | .2856 | 9522 | 7613  | 1522 | 9800 | 7056  | 1800 | 1344  | 99.78  |
| 20000 | .85  | .70 | .30 | 9800 | 8400 | 1800 | .7134 | .2866 | 9539 | 7662  | 1539 | 9800 | 7140  | 1800 | 1260  | 87.11  |
| 20000 | .86  | .70 | .30 | 9800 | 8400 | 1800 | .7125 | .2875 | 9556 | 7712  | 1556 | 9800 | 7224  | 1800 | 1176  | 75.39  |
| 20000 | .87  | .70 | .30 | 9800 | 8400 | 1800 | .7116 | .2884 | 9573 | 7762  | 1573 | 9800 | 7308  | 1800 | 1092  | 64.58  |
| 20000 | .88  | .70 | .30 | 9800 | 8400 | 1800 | .7106 | .2894 | 9590 | 7811  | 1590 | 9800 | 7392  | 1800 | 1008  | 54.67  |
| 20000 | .89  | .70 | .30 | 9800 | 8400 | 1800 | .7097 | .2903 | 9608 | 7860  | 1608 | 9800 | 7476  | 1800 | 924   | 45.64  |
| 20000 | .90  | .70 | .30 | 9800 | 8400 | 1800 | .7088 | .2912 | 9625 | 7910  | 1625 | 9800 | 7560  | 1800 | 840   | 37.48  |
| 20000 | .91  | .70 | .30 | 9800 | 8400 | 1800 | .7079 | .2921 | 9642 | 7959  | 1642 | 9800 | 7644  | 1800 | 756   | 30.17  |
| 20000 | .92  | .70 | .30 | 9800 | 8400 | 1800 | .7070 | .2930 | 9660 | 8008  | 1660 | 9800 | 7728  | 1800 | 672   | 23.69  |
| 20000 | .93  | .70 | .30 | 9800 | 8400 | 1800 | .7061 | .2939 | 9677 | 8058  | 1677 | 9800 | 7812  | 1800 | 588   | 18.03  |
| 20000 | .94  | .70 | .30 | 9800 | 8400 | 1800 | .7052 | .2948 | 9695 | 8107  | 1695 | 9800 | 7896  | 1800 | 504   | 13.16  |
| 20000 | .95  | .70 | .30 | 9800 | 8400 | 1800 | .7043 | .2957 | 9712 | 8156  | 1712 | 9800 | 7980  | 1800 | 420   | 9.09   |
| 20000 | .96  | .70 | .30 | 9800 | 8400 | 1800 | .7034 | .2966 | 9730 | 8205  | 1730 | 9800 | 8064  | 1800 | 336   | 5.78   |
| 20000 | .97  | .70 | .30 | 9800 | 8400 | 1800 | .7026 | .2974 | 9747 | 8254  | 1747 | 9800 | 8148  | 1800 | 252   | 3.23   |
| 20000 | .98  | .70 | .30 | 9800 | 8400 | 1800 | .7017 | .2983 | 9765 | 8302  | 1765 | 9800 | 8232  | 1800 | 168   | 1.43   |



|       |      |     |     |       |      |      |       |       |       |      |      |       |       |      |       |        |
|-------|------|-----|-----|-------|------|------|-------|-------|-------|------|------|-------|-------|------|-------|--------|
| 20000 | .99  | .70 | .30 | 9800  | 8400 | 1800 | .7008 | .2992 | 9782  | 8351 | 1782 | 9800  | 8316  | 1800 | 84    | .35    |
| 20000 | 1.00 | .70 | .30 | 9800  | 8400 | 1800 | .7000 | .3000 | 9800  | 8400 | 1800 | 9800  | 8400  | 1800 | 0     | .00    |
| 20000 | 1.01 | .70 | .30 | 9800  | 8400 | 1800 | .6992 | .3008 | 9818  | 8449 | 1818 | 9800  | 8484  | 1800 | -84   | .35    |
| 20000 | 1.02 | .70 | .30 | 9800  | 8400 | 1800 | .6983 | .3017 | 9835  | 8497 | 1835 | 9800  | 8568  | 1800 | -168  | 1.40   |
| 20000 | 1.03 | .70 | .30 | 9800  | 8400 | 1800 | .6975 | .3025 | 9853  | 8546 | 1853 | 9800  | 8652  | 1800 | -252  | 3.12   |
| 20000 | 1.04 | .70 | .30 | 9800  | 8400 | 1800 | .6967 | .3033 | 9871  | 8594 | 1871 | 9800  | 8736  | 1800 | -336  | 5.52   |
| 20000 | 1.05 | .70 | .30 | 9800  | 8400 | 1800 | .6959 | .3041 | 9889  | 8643 | 1889 | 9800  | 8820  | 1800 | -420  | 8.57   |
| 20000 | 1.06 | .70 | .30 | 9800  | 8400 | 1800 | .6951 | .3049 | 9906  | 8691 | 1906 | 9800  | 8904  | 1800 | -504  | 12.28  |
| 20000 | 1.07 | .70 | .30 | 9800  | 8400 | 1800 | .6943 | .3057 | 9924  | 8740 | 1924 | 9800  | 8988  | 1800 | -588  | 16.62  |
| 20000 | 1.08 | .70 | .30 | 9800  | 8400 | 1800 | .6935 | .3065 | 9942  | 8788 | 1942 | 9800  | 9072  | 1800 | -672  | 21.59  |
| 20000 | 1.09 | .70 | .30 | 9800  | 8400 | 1800 | .6927 | .3073 | 9960  | 8836 | 1960 | 9800  | 9156  | 1800 | -756  | 27.17  |
| 20000 | 1.10 | .70 | .30 | 9800  | 8400 | 1800 | .6919 | .3081 | 9978  | 8884 | 1978 | 9800  | 9240  | 1800 | -840  | 33.37  |
| 20000 | 1.11 | .70 | .30 | 9800  | 8400 | 1800 | .6912 | .3088 | 9996  | 8933 | 1996 | 9800  | 9324  | 1800 | -924  | 40.16  |
| 20000 | 1.12 | .70 | .30 | 9800  | 8400 | 1800 | .6904 | .3096 | 10014 | 8981 | 2014 | 9800  | 9408  | 1800 | -1008 | 47.54  |
| 20000 | 1.13 | .70 | .30 | 9800  | 8400 | 1800 | .6896 | .3104 | 10032 | 9029 | 2032 | 9800  | 9492  | 1800 | -1092 | 55.50  |
| 20000 | 1.14 | .70 | .30 | 9800  | 8400 | 1800 | .6889 | .3111 | 10050 | 9077 | 2050 | 9800  | 9576  | 1800 | -1176 | 64.04  |
| 20000 | 1.15 | .70 | .30 | 9800  | 8400 | 1800 | .6881 | .3119 | 10068 | 9125 | 2068 | 9800  | 9660  | 1800 | -1260 | 73.13  |
| 20000 | 1.16 | .70 | .30 | 9800  | 8400 | 1800 | .6874 | .3126 | 10086 | 9173 | 2086 | 9800  | 9744  | 1800 | -1344 | 82.78  |
| 20000 | 1.17 | .70 | .30 | 9800  | 8400 | 1800 | .6867 | .3133 | 10104 | 9221 | 2104 | 9800  | 9828  | 1800 | -1428 | 92.98  |
| 20000 | 1.18 | .70 | .30 | 9800  | 8400 | 1800 | .6859 | .3141 | 10122 | 9268 | 2122 | 9800  | 9912  | 1800 | -1512 | 103.71 |
| 20000 | 1.19 | .70 | .30 | 9800  | 8400 | 1800 | .6852 | .3148 | 10140 | 9316 | 2140 | 9800  | 9996  | 1800 | -1596 | 114.97 |
| 20000 | 1.20 | .70 | .30 | 9800  | 8400 | 1800 | .6845 | .3155 | 10158 | 9364 | 2158 | 9800  | 10080 | 1800 | -1680 | 126.76 |
| 20000 | .80  | .75 | .25 | 11250 | 7500 | 1250 | .7703 | .2297 | 10976 | 6547 | 976  | 11250 | 6000  | 1250 | 1500  | 129.27 |
| 20000 | .81  | .75 | .25 | 11250 | 7500 | 1250 | .7692 | .2308 | 10990 | 6596 | 990  | 11250 | 6075  | 1250 | 1425  | 115.77 |
| 20000 | .82  | .75 | .25 | 11250 | 7500 | 1250 | .7681 | .2319 | 11003 | 6644 | 1003 | 11250 | 6150  | 1250 | 1350  | 103.12 |
| 20000 | .83  | .75 | .25 | 11250 | 7500 | 1250 | .7670 | .2330 | 11016 | 6692 | 1016 | 11250 | 6225  | 1250 | 1275  | 91.29  |
| 20000 | .84  | .75 | .25 | 11250 | 7500 | 1250 | .7660 | .2340 | 11030 | 6740 | 1030 | 11250 | 6300  | 1250 | 1200  | 80.27  |

|       |      |     |     |       |      |      |       |       |       |      |      |       |      |      |       |       |
|-------|------|-----|-----|-------|------|------|-------|-------|-------|------|------|-------|------|------|-------|-------|
| 20000 | .85  | .75 | .25 | 11250 | 7500 | 1250 | .7649 | .2351 | 11043 | 6788 | 1043 | 11250 | 6375 | 1250 | 1125  | 70.03 |
| 20000 | .86  | .75 | .25 | 11250 | 7500 | 1250 | .7639 | .2361 | 11057 | 6836 | 1057 | 11250 | 6450 | 1250 | 1050  | 60.56 |
| 20000 | .87  | .75 | .25 | 11250 | 7500 | 1250 | .7628 | .2372 | 11070 | 6884 | 1070 | 11250 | 6525 | 1250 | 975   | 51.84 |
| 20000 | .88  | .75 | .25 | 11250 | 7500 | 1250 | .7618 | .2382 | 11084 | 6932 | 1084 | 11250 | 6600 | 1250 | 900   | 43.86 |
| 20000 | .89  | .75 | .25 | 11250 | 7500 | 1250 | .7608 | .2392 | 11098 | 6980 | 1098 | 11250 | 6675 | 1250 | 825   | 36.60 |
| 20000 | .90  | .75 | .25 | 11250 | 7500 | 1250 | .7597 | .2403 | 11111 | 7028 | 1111 | 11250 | 6750 | 1250 | 750   | 30.04 |
| 20000 | .91  | .75 | .25 | 11250 | 7500 | 1250 | .7587 | .2413 | 11125 | 7075 | 1125 | 11250 | 6825 | 1250 | 675   | 24.16 |
| 20000 | .92  | .75 | .25 | 11250 | 7500 | 1250 | .7577 | .2423 | 11139 | 7123 | 1139 | 11250 | 6900 | 1250 | 600   | 18.96 |
| 20000 | .93  | .75 | .25 | 11250 | 7500 | 1250 | .7567 | .2433 | 11152 | 7170 | 1152 | 11250 | 6975 | 1250 | 525   | 14.42 |
| 20000 | .94  | .75 | .25 | 11250 | 7500 | 1250 | .7558 | .2442 | 11166 | 7217 | 1166 | 11250 | 7050 | 1250 | 450   | 10.52 |
| 20000 | .95  | .75 | .25 | 11250 | 7500 | 1250 | .7548 | .2452 | 11180 | 7265 | 1180 | 11250 | 7125 | 1250 | 375   | 7.26  |
| 20000 | .96  | .75 | .25 | 11250 | 7500 | 1250 | .7538 | .2462 | 11194 | 7312 | 1194 | 11250 | 7200 | 1250 | 300   | 4.62  |
| 20000 | .97  | .75 | .25 | 11250 | 7500 | 1250 | .7528 | .2472 | 11208 | 7359 | 1208 | 11250 | 7275 | 1250 | 225   | 2.58  |
| 20000 | .98  | .75 | .25 | 11250 | 7500 | 1250 | .7519 | .2481 | 11222 | 7406 | 1222 | 11250 | 7350 | 1250 | 150   | 1.14  |
| 20000 | .99  | .75 | .25 | 11250 | 7500 | 1250 | .7509 | .2491 | 11236 | 7453 | 1236 | 11250 | 7425 | 1250 | 75    | .28   |
| 20000 | 1.00 | .75 | .25 | 11250 | 7500 | 1250 | .7500 | .2500 | 11250 | 7500 | 1250 | 11250 | 7500 | 1250 | 0     | .00   |
| 20000 | 1.01 | .75 | .25 | 11250 | 7500 | 1250 | .7491 | .2509 | 11264 | 7547 | 1264 | 11250 | 7575 | 1250 | -75   | .28   |
| 20000 | 1.02 | .75 | .25 | 11250 | 7500 | 1250 | .7481 | .2519 | 11278 | 7594 | 1278 | 11250 | 7650 | 1250 | -150  | 1.11  |
| 20000 | 1.03 | .75 | .25 | 11250 | 7500 | 1250 | .7472 | .2528 | 11292 | 7640 | 1292 | 11250 | 7725 | 1250 | -225  | 2.48  |
| 20000 | 1.04 | .75 | .25 | 11250 | 7500 | 1250 | .7463 | .2537 | 11307 | 7687 | 1307 | 11250 | 7800 | 1250 | -300  | 4.39  |
| 20000 | 1.05 | .75 | .25 | 11250 | 7500 | 1250 | .7454 | .2546 | 11321 | 7734 | 1321 | 11250 | 7875 | 1250 | -375  | 6.82  |
| 20000 | 1.06 | .75 | .25 | 11250 | 7500 | 1250 | .7445 | .2555 | 11335 | 7780 | 1335 | 11250 | 7950 | 1250 | -450  | 9.76  |
| 20000 | 1.07 | .75 | .25 | 11250 | 7500 | 1250 | .7436 | .2564 | 11349 | 7826 | 1349 | 11250 | 8025 | 1250 | -525  | 13.21 |
| 20000 | 1.08 | .75 | .25 | 11250 | 7500 | 1250 | .7427 | .2573 | 11364 | 7873 | 1364 | 11250 | 8100 | 1250 | -600  | 17.15 |
| 20000 | 1.09 | .75 | .25 | 11250 | 7500 | 1250 | .7418 | .2582 | 11378 | 7919 | 1378 | 11250 | 8175 | 1250 | -675  | 21.59 |
| 20000 | 1.10 | .75 | .25 | 11250 | 7500 | 1250 | .7410 | .2590 | 11392 | 7965 | 1392 | 11250 | 8250 | 1250 | -750  | 26.50 |
| 20000 | 1.11 | .75 | .25 | 11250 | 7500 | 1250 | .7401 | .2599 | 11407 | 8012 | 1407 | 11250 | 8325 | 1250 | -825  | 31.88 |
| 20000 | 1.12 | .75 | .25 | 11250 | 7500 | 1250 | .7392 | .2608 | 11421 | 8058 | 1421 | 11250 | 8400 | 1250 | -900  | 37.73 |
| 20000 | 1.13 | .75 | .25 | 11250 | 7500 | 1250 | .7384 | .2616 | 11436 | 8104 | 1436 | 11250 | 8475 | 1250 | -975  | 44.03 |
| 20000 | 1.14 | .75 | .25 | 11250 | 7500 | 1250 | .7375 | .2625 | 11450 | 8150 | 1450 | 11250 | 8550 | 1250 | -1050 | 50.78 |
| 20000 | 1.15 | .75 | .25 | 11250 | 7500 | 1250 | .7367 | .2633 | 11465 | 8196 | 1465 | 11250 | 8625 | 1250 | -1125 | 57.98 |
| 20000 | 1.16 | .75 | .25 | 11250 | 7500 | 1250 | .7358 | .2642 | 11479 | 8242 | 1479 | 11250 | 8700 | 1250 | -1200 | 65.61 |
| 20000 | 1.17 | .75 | .25 | 11250 | 7500 | 1250 | .7350 | .2650 | 11494 | 8287 | 1494 | 11250 | 8775 | 1250 | -1275 | 73.67 |

|       |      |     |     |       |      |      |       |       |       |      |      |       |      |      |       |        |
|-------|------|-----|-----|-------|------|------|-------|-------|-------|------|------|-------|------|------|-------|--------|
| 20000 | 1.18 | .75 | .25 | 11250 | 7500 | 1250 | .7342 | .2658 | 11508 | 8333 | 1508 | 11250 | 8850 | 1250 | -1350 | 82.16  |
| 20000 | 1.19 | .75 | .25 | 11250 | 7500 | 1250 | .7334 | .2666 | 11523 | 8379 | 1523 | 11250 | 8925 | 1250 | -1425 | 91.05  |
| 20000 | 1.20 | .75 | .25 | 11250 | 7500 | 1250 | .7326 | .2674 | 11538 | 8424 | 1538 | 11250 | 9000 | 1250 | -1500 | 100.36 |
| 20000 | .80  | .80 | .20 | 12800 | 6400 | 800  | .8205 | .1795 | 12603 | 5514 | 603  | 12800 | 5120 | 800  | 1280  | 95.51  |
| 20000 | .81  | .80 | .20 | 12800 | 6400 | 800  | .8194 | .1806 | 12613 | 5559 | 613  | 12800 | 5184 | 800  | 1216  | 85.46  |
| 20000 | .82  | .80 | .20 | 12800 | 6400 | 800  | .8183 | .1817 | 12622 | 5604 | 622  | 12800 | 5248 | 800  | 1152  | 76.05  |
| 20000 | .83  | .80 | .20 | 12800 | 6400 | 800  | .8173 | .1827 | 12632 | 5649 | 632  | 12800 | 5312 | 800  | 1088  | 67.27  |
| 20000 | .84  | .80 | .20 | 12800 | 6400 | 800  | .8162 | .1838 | 12641 | 5694 | 641  | 12800 | 5376 | 800  | 1024  | 59.09  |
| 20000 | .85  | .80 | .20 | 12800 | 6400 | 800  | .8151 | .1849 | 12651 | 5738 | 651  | 12800 | 5440 | 800  | 960   | 51.51  |
| 20000 | .86  | .80 | .20 | 12800 | 6400 | 800  | .8141 | .1859 | 12660 | 5783 | 660  | 12800 | 5504 | 800  | 896   | 44.51  |
| 20000 | .87  | .80 | .20 | 12800 | 6400 | 800  | .8130 | .1870 | 12670 | 5828 | 670  | 12800 | 5568 | 800  | 832   | 38.08  |
| 20000 | .88  | .80 | .20 | 12800 | 6400 | 800  | .8120 | .1880 | 12680 | 5872 | 680  | 12800 | 5632 | 800  | 768   | 32.19  |
| 20000 | .89  | .80 | .20 | 12800 | 6400 | 800  | .8109 | .1891 | 12690 | 5917 | 690  | 12800 | 5696 | 800  | 704   | 26.84  |
| 20000 | .90  | .80 | .20 | 12800 | 6400 | 800  | .8099 | .1901 | 12700 | 5961 | 700  | 12800 | 5760 | 800  | 640   | 22.01  |
| 20000 | .91  | .80 | .20 | 12800 | 6400 | 800  | .8089 | .1911 | 12709 | 6005 | 709  | 12800 | 5824 | 800  | 576   | 17.69  |
| 20000 | .92  | .80 | .20 | 12800 | 6400 | 800  | .8079 | .1921 | 12719 | 6049 | 719  | 12800 | 5888 | 800  | 512   | 13.88  |
| 20000 | .93  | .80 | .20 | 12800 | 6400 | 800  | .8069 | .1931 | 12729 | 6094 | 729  | 12800 | 5952 | 800  | 448   | 10.54  |
| 20000 | .94  | .80 | .20 | 12800 | 6400 | 800  | .8059 | .1941 | 12739 | 6138 | 739  | 12800 | 6016 | 800  | 384   | 7.69   |
| 20000 | .95  | .80 | .20 | 12800 | 6400 | 800  | .8049 | .1951 | 12749 | 6181 | 749  | 12800 | 6080 | 800  | 320   | 5.30   |
| 20000 | .96  | .80 | .20 | 12800 | 6400 | 800  | .8039 | .1961 | 12759 | 6225 | 759  | 12800 | 6144 | 800  | 256   | 3.37   |
| 20000 | .97  | .80 | .20 | 12800 | 6400 | 800  | .8029 | .1971 | 12769 | 6269 | 769  | 12800 | 6208 | 800  | 192   | 1.88   |
| 20000 | .98  | .80 | .20 | 12800 | 6400 | 800  | .8019 | .1981 | 12780 | 6313 | 780  | 12800 | 6272 | 800  | 128   | .83    |
| 20000 | .99  | .80 | .20 | 12800 | 6400 | 800  | .8010 | .1990 | 12790 | 6356 | 790  | 12800 | 6336 | 800  | 64    | .21    |
| 20000 | 1.00 | .80 | .20 | 12800 | 6400 | 800  | .8000 | .2000 | 12800 | 6400 | 800  | 12800 | 6400 | 800  | 0     | .00    |
| 20000 | 1.01 | .80 | .20 | 12800 | 6400 | 800  | .7990 | .2010 | 12810 | 6443 | 810  | 12800 | 6464 | 800  | -64   | .20    |
| 20000 | 1.02 | .80 | .20 | 12800 | 6400 | 800  | .7981 | .2019 | 12821 | 6487 | 821  | 12800 | 6528 | 800  | -128  | .81    |
| 20000 | 1.03 | .80 | .20 | 12800 | 6400 | 800  | .7971 | .2029 | 12831 | 6530 | 831  | 12800 | 6592 | 800  | -192  | 1.81   |
| 20000 | 1.04 | .80 | .20 | 12800 | 6400 | 800  | .7962 | .2038 | 12841 | 6573 | 841  | 12800 | 6656 | 800  | -256  | 3.19   |
| 20000 | 1.05 | .80 | .20 | 12800 | 6400 | 800  | .7953 | .2047 | 12852 | 6617 | 852  | 12800 | 6720 | 800  | -320  | 4.95   |
| 20000 | 1.06 | .80 | .20 | 12800 | 6400 | 800  | .7943 | .2057 | 12862 | 6660 | 862  | 12800 | 6784 | 800  | -384  | 7.09   |
| 20000 | 1.07 | .80 | .20 | 12800 | 6400 | 800  | .7934 | .2066 | 12873 | 6703 | 873  | 12800 | 6848 | 800  | -448  | 9.59   |
| 20000 | 1.08 | .80 | .20 | 12800 | 6400 | 800  | .7925 | .2075 | 12883 | 6746 | 883  | 12800 | 6912 | 800  | -512  | 12.44  |

|       |      |     |     |       |      |     |       |       |       |      |      |       |      |     |       |       |
|-------|------|-----|-----|-------|------|-----|-------|-------|-------|------|------|-------|------|-----|-------|-------|
| 20000 | 1.09 | .80 | .20 | 12800 | 6400 | 800 | .7916 | .2084 | 12894 | 6789 | 894  | 12800 | 6976 | 800 | -576  | 15.65 |
| 20000 | 1.10 | .80 | .20 | 12800 | 6400 | 800 | .7907 | .2093 | 12904 | 6832 | 904  | 12800 | 7040 | 800 | -640  | 19.20 |
| 20000 | 1.11 | .80 | .20 | 12800 | 6400 | 800 | .7898 | .2102 | 12915 | 6874 | 915  | 12800 | 7104 | 800 | -704  | 23.09 |
| 20000 | 1.12 | .80 | .20 | 12800 | 6400 | 800 | .7889 | .2111 | 12925 | 6917 | 925  | 12800 | 7168 | 800 | -768  | 27.32 |
| 20000 | 1.13 | .80 | .20 | 12800 | 6400 | 800 | .7880 | .2120 | 12936 | 6960 | 936  | 12800 | 7232 | 800 | -832  | 31.87 |
| 20000 | 1.14 | .80 | .20 | 12800 | 6400 | 800 | .7871 | .2129 | 12947 | 7002 | 947  | 12800 | 7296 | 800 | -896  | 36.74 |
| 20000 | 1.15 | .80 | .20 | 12800 | 6400 | 800 | .7863 | .2137 | 12958 | 7045 | 958  | 12800 | 7360 | 800 | -960  | 41.94 |
| 20000 | 1.16 | .80 | .20 | 12800 | 6400 | 800 | .7854 | .2146 | 12968 | 7087 | 968  | 12800 | 7424 | 800 | -1024 | 47.44 |
| 20000 | 1.17 | .80 | .20 | 12800 | 6400 | 800 | .7845 | .2155 | 12979 | 7130 | 979  | 12800 | 7488 | 800 | -1088 | 53.25 |
| 20000 | 1.18 | .80 | .20 | 12800 | 6400 | 800 | .7837 | .2163 | 12990 | 7172 | 990  | 12800 | 7552 | 800 | -1152 | 59.36 |
| 20000 | 1.19 | .80 | .20 | 12800 | 6400 | 800 | .7828 | .2172 | 13001 | 7214 | 1001 | 12800 | 7616 | 800 | -1216 | 65.77 |
| 20000 | 1.20 | .80 | .20 | 12800 | 6400 | 800 | .7820 | .2180 | 13012 | 7257 | 1012 | 12800 | 7680 | 800 | -1280 | 72.47 |
| 20000 | .80  | .85 | .15 | 14450 | 5100 | 450 | .8688 | .1312 | 14327 | 4327 | 327  | 14450 | 4080 | 450 | 1020  | 61.69 |
| 20000 | .81  | .85 | .15 | 14450 | 5100 | 450 | .8678 | .1322 | 14332 | 4366 | 332  | 14450 | 4131 | 450 | 969   | 55.14 |
| 20000 | .82  | .85 | .15 | 14450 | 5100 | 450 | .8668 | .1332 | 14338 | 4405 | 338  | 14450 | 4182 | 450 | 918   | 49.02 |
| 20000 | .83  | .85 | .15 | 14450 | 5100 | 450 | .8659 | .1341 | 14344 | 4444 | 344  | 14450 | 4233 | 450 | 867   | 43.31 |
| 20000 | .84  | .85 | .15 | 14450 | 5100 | 450 | .8649 | .1351 | 14350 | 4484 | 350  | 14450 | 4284 | 450 | 816   | 38.01 |
| 20000 | .85  | .85 | .15 | 14450 | 5100 | 450 | .8639 | .1361 | 14356 | 4523 | 356  | 14450 | 4335 | 450 | 765   | 33.10 |
| 20000 | .86  | .85 | .15 | 14450 | 5100 | 450 | .8630 | .1370 | 14362 | 4562 | 362  | 14450 | 4386 | 450 | 714   | 28.58 |
| 20000 | .87  | .85 | .15 | 14450 | 5100 | 450 | .8620 | .1380 | 14368 | 4600 | 368  | 14450 | 4437 | 450 | 663   | 24.42 |
| 20000 | .88  | .85 | .15 | 14450 | 5100 | 450 | .8610 | .1390 | 14374 | 4639 | 374  | 14450 | 4488 | 450 | 612   | 20.63 |
| 20000 | .89  | .85 | .15 | 14450 | 5100 | 450 | .8601 | .1399 | 14380 | 4678 | 380  | 14450 | 4539 | 450 | 561   | 17.18 |
| 20000 | .90  | .85 | .15 | 14450 | 5100 | 450 | .8592 | .1408 | 14387 | 4717 | 387  | 14450 | 4590 | 450 | 510   | 14.08 |
| 20000 | .91  | .85 | .15 | 14450 | 5100 | 450 | .8582 | .1418 | 14393 | 4755 | 393  | 14450 | 4641 | 450 | 459   | 11.31 |
| 20000 | .92  | .85 | .15 | 14450 | 5100 | 450 | .8573 | .1427 | 14399 | 4794 | 399  | 14450 | 4692 | 450 | 408   | 8.86  |
| 20000 | .93  | .85 | .15 | 14450 | 5100 | 450 | .8564 | .1436 | 14405 | 4832 | 405  | 14450 | 4743 | 450 | 357   | 6.73  |
| 20000 | .94  | .85 | .15 | 14450 | 5100 | 450 | .8554 | .1446 | 14412 | 4871 | 412  | 14450 | 4794 | 450 | 306   | 4.90  |
| 20000 | .95  | .85 | .15 | 14450 | 5100 | 450 | .8545 | .1455 | 14418 | 4909 | 418  | 14450 | 4845 | 450 | 255   | 3.38  |
| 20000 | .96  | .85 | .15 | 14450 | 5100 | 450 | .8536 | .1464 | 14424 | 4948 | 424  | 14450 | 4896 | 450 | 204   | 2.15  |
| 20000 | .97  | .85 | .15 | 14450 | 5100 | 450 | .8527 | .1473 | 14431 | 4986 | 431  | 14450 | 4947 | 450 | 153   | 1.20  |
| 20000 | .98  | .85 | .15 | 14450 | 5100 | 450 | .8518 | .1482 | 14437 | 5024 | 437  | 14450 | 4998 | 450 | 102   | .53   |
| 20000 | .99  | .85 | .15 | 14450 | 5100 | 450 | .8509 | .1491 | 14444 | 5062 | 444  | 14450 | 5049 | 450 | 51    | .13   |
| 20000 | 1.00 | .85 | .15 | 14450 | 5100 | 450 | .8500 | .1500 | 14450 | 5100 | 450  | 14450 | 5100 | 450 | 0     | .00   |

|       |      |     |     |       |      |     |       |       |       |      |     |       |      |     |       |       |
|-------|------|-----|-----|-------|------|-----|-------|-------|-------|------|-----|-------|------|-----|-------|-------|
| 20000 | 1.01 | .85 | .15 | 14450 | 5100 | 450 | .8491 | .1509 | 14457 | 5138 | 457 | 14450 | 5151 | 450 | -51   | .13   |
| 20000 | 1.02 | .85 | .15 | 14450 | 5100 | 450 | .8482 | .1518 | 14463 | 5176 | 463 | 14450 | 5202 | 450 | -102  | .51   |
| 20000 | 1.03 | .85 | .15 | 14450 | 5100 | 450 | .8473 | .1527 | 14470 | 5214 | 470 | 14450 | 5253 | 450 | -153  | 1.15  |
| 20000 | 1.04 | .85 | .15 | 14450 | 5100 | 450 | .8465 | .1535 | 14476 | 5251 | 476 | 14450 | 5304 | 450 | -204  | 2.02  |
| 20000 | 1.05 | .85 | .15 | 14450 | 5100 | 450 | .8456 | .1544 | 14483 | 5289 | 483 | 14450 | 5355 | 450 | -255  | 3.14  |
| 20000 | 1.06 | .85 | .15 | 14450 | 5100 | 450 | .8447 | .1553 | 14490 | 5327 | 490 | 14450 | 5406 | 450 | -306  | 4.48  |
| 20000 | 1.07 | .85 | .15 | 14450 | 5100 | 450 | .8439 | .1561 | 14496 | 5364 | 496 | 14450 | 5457 | 450 | -357  | 6.06  |
| 20000 | 1.08 | .85 | .15 | 14450 | 5100 | 450 | .8430 | .1570 | 14503 | 5402 | 503 | 14450 | 5508 | 450 | -408  | 7.86  |
| 20000 | 1.09 | .85 | .15 | 14450 | 5100 | 450 | .8421 | .1579 | 14510 | 5439 | 510 | 14450 | 5559 | 450 | -459  | 9.89  |
| 20000 | 1.10 | .85 | .15 | 14450 | 5100 | 450 | .8413 | .1587 | 14517 | 5477 | 517 | 14450 | 5610 | 450 | -510  | 12.12 |
| 20000 | 1.11 | .85 | .15 | 14450 | 5100 | 450 | .8405 | .1595 | 14523 | 5514 | 523 | 14450 | 5661 | 450 | -561  | 14.57 |
| 20000 | 1.12 | .85 | .15 | 14450 | 5100 | 450 | .8396 | .1604 | 14530 | 5551 | 530 | 14450 | 5712 | 450 | -612  | 17.23 |
| 20000 | 1.13 | .85 | .15 | 14450 | 5100 | 450 | .8388 | .1612 | 14537 | 5589 | 537 | 14450 | 5763 | 450 | -663  | 20.09 |
| 20000 | 1.14 | .85 | .15 | 14450 | 5100 | 450 | .8379 | .1621 | 14544 | 5626 | 544 | 14450 | 5814 | 450 | -714  | 23.16 |
| 20000 | 1.15 | .85 | .15 | 14450 | 5100 | 450 | .8371 | .1629 | 14551 | 5663 | 551 | 14450 | 5865 | 450 | -765  | 26.42 |
| 20000 | 1.16 | .85 | .15 | 14450 | 5100 | 450 | .8363 | .1637 | 14558 | 5700 | 558 | 14450 | 5916 | 450 | -816  | 29.87 |
| 20000 | 1.17 | .85 | .15 | 14450 | 5100 | 450 | .8355 | .1645 | 14565 | 5737 | 565 | 14450 | 5967 | 450 | -867  | 33.51 |
| 20000 | 1.18 | .85 | .15 | 14450 | 5100 | 450 | .8346 | .1654 | 14572 | 5774 | 572 | 14450 | 6018 | 450 | -918  | 37.34 |
| 20000 | 1.19 | .85 | .15 | 14450 | 5100 | 450 | .8338 | .1662 | 14579 | 5811 | 579 | 14450 | 6069 | 450 | -969  | 41.36 |
| 20000 | 1.20 | .85 | .15 | 14450 | 5100 | 450 | .8330 | .1670 | 14586 | 5848 | 586 | 14450 | 6120 | 450 | -1020 | 45.55 |
| 20000 | .80  | .90 | .10 | 16200 | 3600 | 200 | .9149 | .0851 | 16140 | 3001 | 140 | 16200 | 2880 | 200 | 720   | 31.34 |
| 20000 | .81  | .90 | .10 | 16200 | 3600 | 200 | .9142 | .0858 | 16142 | 3031 | 142 | 16200 | 2916 | 200 | 684   | 27.98 |
| 20000 | .82  | .90 | .10 | 16200 | 3600 | 200 | .9134 | .0866 | 16145 | 3062 | 145 | 16200 | 2952 | 200 | 648   | 24.84 |
| 20000 | .83  | .90 | .10 | 16200 | 3600 | 200 | .9126 | .0874 | 16148 | 3092 | 148 | 16200 | 2988 | 200 | 612   | 21.93 |
| 20000 | .84  | .90 | .10 | 16200 | 3600 | 200 | .9119 | .0881 | 16151 | 3122 | 151 | 16200 | 3024 | 200 | 576   | 19.22 |
| 20000 | .85  | .90 | .10 | 16200 | 3600 | 200 | .9111 | .0889 | 16154 | 3152 | 154 | 16200 | 3060 | 200 | 540   | 16.72 |
| 20000 | .86  | .90 | .10 | 16200 | 3600 | 200 | .9103 | .0897 | 16157 | 3183 | 157 | 16200 | 3096 | 200 | 504   | 14.42 |
| 20000 | .87  | .90 | .10 | 16200 | 3600 | 200 | .9096 | .0904 | 16160 | 3213 | 160 | 16200 | 3132 | 200 | 468   | 12.31 |
| 20000 | .88  | .90 | .10 | 16200 | 3600 | 200 | .9088 | .0912 | 16163 | 3243 | 163 | 16200 | 3168 | 200 | 432   | 10.39 |
| 20000 | .89  | .90 | .10 | 16200 | 3600 | 200 | .9081 | .0919 | 16166 | 3273 | 166 | 16200 | 3204 | 200 | 396   | 8.64  |
| 20000 | .90  | .90 | .10 | 16200 | 3600 | 200 | .9073 | .0927 | 16169 | 3303 | 169 | 16200 | 3240 | 200 | 360   | 7.08  |
| 20000 | .91  | .90 | .10 | 16200 | 3600 | 200 | .9066 | .0934 | 16172 | 3333 | 172 | 16200 | 3276 | 200 | 324   | 5.68  |
| 20000 | .92  | .90 | .10 | 16200 | 3600 | 200 | .9058 | .0942 | 16175 | 3362 | 175 | 16200 | 3312 | 200 | 288   | 4.45  |

|       |      |     |     |       |      |     |       |       |       |      |     |       |      |     |      |       |
|-------|------|-----|-----|-------|------|-----|-------|-------|-------|------|-----|-------|------|-----|------|-------|
| 20000 | .93  | .90 | .10 | 16200 | 3600 | 200 | .9051 | .0949 | 16178 | 3392 | 178 | 16200 | 3348 | 200 | 252  | 3.37  |
| 20000 | .94  | .90 | .10 | 16200 | 3600 | 200 | .9044 | .0956 | 16181 | 3422 | 181 | 16200 | 3384 | 200 | 216  | 2.46  |
| 20000 | .95  | .90 | .10 | 16200 | 3600 | 200 | .9036 | .0964 | 16184 | 3452 | 184 | 16200 | 3420 | 200 | 180  | 1.69  |
| 20000 | .96  | .90 | .10 | 16200 | 3600 | 200 | .9029 | .0971 | 16187 | 3482 | 187 | 16200 | 3456 | 200 | 144  | 1.07  |
| 20000 | .97  | .90 | .10 | 16200 | 3600 | 200 | .9022 | .0978 | 16190 | 3511 | 190 | 16200 | 3492 | 200 | 108  | .60   |
| 20000 | .98  | .90 | .10 | 16200 | 3600 | 200 | .9014 | .0986 | 16194 | 3541 | 194 | 16200 | 3528 | 200 | 72   | .26   |
| 20000 | .99  | .90 | .10 | 16200 | 3600 | 200 | .9007 | .0993 | 16197 | 3570 | 197 | 16200 | 3564 | 200 | 36   | .07   |
| 20000 | 1.00 | .90 | .10 | 16200 | 3600 | 200 | .9000 | .1000 | 16200 | 3600 | 200 | 16200 | 3600 | 200 | 0    | .00   |
| 20000 | 1.01 | .90 | .10 | 16200 | 3600 | 200 | .8993 | .1007 | 16203 | 3629 | 203 | 16200 | 3636 | 200 | -36  | .06   |
| 20000 | 1.02 | .90 | .10 | 16200 | 3600 | 200 | .8986 | .1014 | 16207 | 3659 | 207 | 16200 | 3672 | 200 | -72  | .26   |
| 20000 | 1.03 | .90 | .10 | 16200 | 3600 | 200 | .8979 | .1021 | 16210 | 3688 | 210 | 16200 | 3708 | 200 | -108 | .57   |
| 20000 | 1.04 | .90 | .10 | 16200 | 3600 | 200 | .8971 | .1029 | 16213 | 3718 | 213 | 16200 | 3744 | 200 | -144 | 1.00  |
| 20000 | 1.05 | .90 | .10 | 16200 | 3600 | 200 | .8964 | .1036 | 16216 | 3747 | 216 | 16200 | 3780 | 200 | -180 | 1.56  |
| 20000 | 1.06 | .90 | .10 | 16200 | 3600 | 200 | .8957 | .1043 | 16220 | 3776 | 220 | 16200 | 3816 | 200 | -216 | 2.23  |
| 20000 | 1.07 | .90 | .10 | 16200 | 3600 | 200 | .8950 | .1050 | 16223 | 3806 | 223 | 16200 | 3852 | 200 | -252 | 3.01  |
| 20000 | 1.08 | .90 | .10 | 16200 | 3600 | 200 | .8943 | .1057 | 16227 | 3835 | 227 | 16200 | 3888 | 200 | -288 | 3.90  |
| 20000 | 1.09 | .90 | .10 | 16200 | 3600 | 200 | .8936 | .1064 | 16230 | 3864 | 230 | 16200 | 3924 | 200 | -324 | 4.90  |
| 20000 | 1.10 | .90 | .10 | 16200 | 3600 | 200 | .8929 | .1071 | 16233 | 3893 | 233 | 16200 | 3960 | 200 | -360 | 6.00  |
| 20000 | 1.11 | .90 | .10 | 16200 | 3600 | 200 | .8922 | .1078 | 16237 | 3922 | 237 | 16200 | 3996 | 200 | -396 | 7.21  |
| 20000 | 1.12 | .90 | .10 | 16200 | 3600 | 200 | .8915 | .1085 | 16240 | 3951 | 240 | 16200 | 4032 | 200 | -432 | 8.52  |
| 20000 | 1.13 | .90 | .10 | 16200 | 3600 | 200 | .8909 | .1091 | 16244 | 3980 | 244 | 16200 | 4068 | 200 | -468 | 9.93  |
| 20000 | 1.14 | .90 | .10 | 16200 | 3600 | 200 | .8902 | .1098 | 16247 | 4009 | 247 | 16200 | 4104 | 200 | -504 | 11.44 |
| 20000 | 1.15 | .90 | .10 | 16200 | 3600 | 200 | .8895 | .1105 | 16251 | 4038 | 251 | 16200 | 4140 | 200 | -540 | 13.04 |
| 20000 | 1.16 | .90 | .10 | 16200 | 3600 | 200 | .8888 | .1112 | 16254 | 4067 | 254 | 16200 | 4176 | 200 | -576 | 14.74 |
| 20000 | 1.17 | .90 | .10 | 16200 | 3600 | 200 | .8881 | .1119 | 16258 | 4096 | 258 | 16200 | 4212 | 200 | -612 | 16.52 |
| 20000 | 1.18 | .90 | .10 | 16200 | 3600 | 200 | .8874 | .1126 | 16262 | 4125 | 262 | 16200 | 4248 | 200 | -648 | 18.40 |
| 20000 | 1.19 | .90 | .10 | 16200 | 3600 | 200 | .8868 | .1132 | 16265 | 4154 | 265 | 16200 | 4284 | 200 | -684 | 20.37 |
| 20000 | 1.20 | .90 | .10 | 16200 | 3600 | 200 | .8861 | .1139 | 16269 | 4182 | 269 | 16200 | 4320 | 200 | -720 | 22.43 |
| 20000 | .80  | .95 | .05 | 18050 | 1900 | 50  | .9587 | .0413 | 18033 | 1553 | 33  | 18050 | 1520 | 50  | 380  | 8.92  |
| 20000 | .81  | .95 | .05 | 18050 | 1900 | 50  | .9583 | .0417 | 18034 | 1571 | 34  | 18050 | 1539 | 50  | 361  | 7.95  |
| 20000 | .82  | .95 | .05 | 18050 | 1900 | 50  | .9578 | .0422 | 18035 | 1588 | 35  | 18050 | 1558 | 50  | 342  | 7.05  |
| 20000 | .83  | .95 | .05 | 18050 | 1900 | 50  | .9574 | .0426 | 18036 | 1606 | 36  | 18050 | 1577 | 50  | 323  | 6.22  |
| 20000 | .84  | .95 | .05 | 18050 | 1900 | 50  | .9569 | .0431 | 18037 | 1623 | 37  | 18050 | 1596 | 50  | 304  | 5.44  |

|       |      |     |     |       |      |    |       |       |       |      |    |       |      |    |      |      |
|-------|------|-----|-----|-------|------|----|-------|-------|-------|------|----|-------|------|----|------|------|
| 20000 | .85  | .95 | .05 | 18050 | 1900 | 50 | .9565 | .0435 | 18037 | 1640 | 37 | 18050 | 1615 | 50 | 285  | 4.73 |
| 20000 | .86  | .95 | .05 | 18050 | 1900 | 50 | .9561 | .0439 | 18038 | 1658 | 38 | 18050 | 1634 | 50 | 266  | 4.07 |
| 20000 | .87  | .95 | .05 | 18050 | 1900 | 50 | .9556 | .0444 | 18039 | 1675 | 39 | 18050 | 1653 | 50 | 247  | 3.47 |
| 20000 | .88  | .95 | .05 | 18050 | 1900 | 50 | .9552 | .0448 | 18040 | 1693 | 40 | 18050 | 1672 | 50 | 228  | 2.93 |
| 20000 | .89  | .95 | .05 | 18050 | 1900 | 50 | .9548 | .0452 | 18041 | 1710 | 41 | 18050 | 1691 | 50 | 209  | 2.43 |
| 20000 | .90  | .95 | .05 | 18050 | 1900 | 50 | .9543 | .0457 | 18041 | 1727 | 41 | 18050 | 1710 | 50 | 190  | 1.99 |
| 20000 | .91  | .95 | .05 | 18050 | 1900 | 50 | .9539 | .0461 | 18042 | 1745 | 42 | 18050 | 1729 | 50 | 171  | 1.60 |
| 20000 | .92  | .95 | .05 | 18050 | 1900 | 50 | .9534 | .0466 | 18043 | 1762 | 43 | 18050 | 1748 | 50 | 152  | 1.25 |
| 20000 | .93  | .95 | .05 | 18050 | 1900 | 50 | .9530 | .0470 | 18044 | 1779 | 44 | 18050 | 1767 | 50 | 133  | .95  |
| 20000 | .94  | .95 | .05 | 18050 | 1900 | 50 | .9526 | .0474 | 18045 | 1797 | 45 | 18050 | 1786 | 50 | 114  | .69  |
| 20000 | .95  | .95 | .05 | 18050 | 1900 | 50 | .9521 | .0479 | 18046 | 1814 | 46 | 18050 | 1805 | 50 | 95   | .47  |
| 20000 | .96  | .95 | .05 | 18050 | 1900 | 50 | .9517 | .0483 | 18046 | 1831 | 46 | 18050 | 1824 | 50 | 76   | .30  |
| 20000 | .97  | .95 | .05 | 18050 | 1900 | 50 | .9513 | .0487 | 18047 | 1848 | 47 | 18050 | 1843 | 50 | 57   | .17  |
| 20000 | .98  | .95 | .05 | 18050 | 1900 | 50 | .9509 | .0491 | 18048 | 1866 | 48 | 18050 | 1862 | 50 | 38   | .07  |
| 20000 | .99  | .95 | .05 | 18050 | 1900 | 50 | .9504 | .0496 | 18049 | 1883 | 49 | 18050 | 1881 | 50 | 19   | .02  |
| 20000 | 1.00 | .95 | .05 | 18050 | 1900 | 50 | .9500 | .0500 | 18050 | 1900 | 50 | 18050 | 1900 | 50 | 0    | .00  |
| 20000 | 1.01 | .95 | .05 | 18050 | 1900 | 50 | .9496 | .0504 | 18051 | 1917 | 51 | 18050 | 1919 | 50 | -19  | .02  |
| 20000 | 1.02 | .95 | .05 | 18050 | 1900 | 50 | .9491 | .0509 | 18052 | 1934 | 52 | 18050 | 1938 | 50 | -38  | .07  |
| 20000 | 1.03 | .95 | .05 | 18050 | 1900 | 50 | .9487 | .0513 | 18053 | 1952 | 53 | 18050 | 1957 | 50 | -57  | .16  |
| 20000 | 1.04 | .95 | .05 | 18050 | 1900 | 50 | .9483 | .0517 | 18054 | 1969 | 54 | 18050 | 1976 | 50 | -76  | .28  |
| 20000 | 1.05 | .95 | .05 | 18050 | 1900 | 50 | .9479 | .0521 | 18055 | 1986 | 55 | 18050 | 1995 | 50 | -95  | .43  |
| 20000 | 1.06 | .95 | .05 | 18050 | 1900 | 50 | .9474 | .0526 | 18056 | 2003 | 56 | 18050 | 2014 | 50 | -114 | .62  |
| 20000 | 1.07 | .95 | .05 | 18050 | 1900 | 50 | .9470 | .0530 | 18056 | 2020 | 56 | 18050 | 2033 | 50 | -133 | .83  |
| 20000 | 1.08 | .95 | .05 | 18050 | 1900 | 50 | .9466 | .0534 | 18057 | 2037 | 57 | 18050 | 2052 | 50 | -152 | 1.08 |
| 20000 | 1.09 | .95 | .05 | 18050 | 1900 | 50 | .9462 | .0538 | 18058 | 2054 | 58 | 18050 | 2071 | 50 | -171 | 1.35 |
| 20000 | 1.10 | .95 | .05 | 18050 | 1900 | 50 | .9458 | .0542 | 18059 | 2071 | 59 | 18050 | 2090 | 50 | -190 | 1.66 |
| 20000 | 1.11 | .95 | .05 | 18050 | 1900 | 50 | .9453 | .0547 | 18060 | 2088 | 60 | 18050 | 2109 | 50 | -209 | 1.99 |
| 20000 | 1.12 | .95 | .05 | 18050 | 1900 | 50 | .9449 | .0551 | 18061 | 2105 | 61 | 18050 | 2128 | 50 | -228 | 2.35 |
| 20000 | 1.13 | .95 | .05 | 18050 | 1900 | 50 | .9445 | .0555 | 18062 | 2122 | 62 | 18050 | 2147 | 50 | -247 | 2.74 |
| 20000 | 1.14 | .95 | .05 | 18050 | 1900 | 50 | .9441 | .0559 | 18063 | 2139 | 63 | 18050 | 2166 | 50 | -266 | 3.15 |
| 20000 | 1.15 | .95 | .05 | 18050 | 1900 | 50 | .9437 | .0563 | 18064 | 2156 | 64 | 18050 | 2185 | 50 | -285 | 3.59 |
| 20000 | 1.16 | .95 | .05 | 18050 | 1900 | 50 | .9433 | .0567 | 18065 | 2173 | 65 | 18050 | 2204 | 50 | -304 | 4.06 |
| 20000 | 1.17 | .95 | .05 | 18050 | 1900 | 50 | .9428 | .0572 | 18066 | 2190 | 66 | 18050 | 2223 | 50 | -323 | 4.55 |

|       |      |      |     |       |      |    |            |       |       |      |    |       |      |    |      |      |
|-------|------|------|-----|-------|------|----|------------|-------|-------|------|----|-------|------|----|------|------|
| 20000 | 1.18 | .95  | .05 | 18050 | 1900 | 50 | .9424      | .0576 | 18067 | 2207 | 67 | 18050 | 2242 | 50 | -342 | 5.06 |
| 20000 | 1.19 | .95  | .05 | 18050 | 1900 | 50 | .9420      | .0580 | 18068 | 2224 | 68 | 18050 | 2261 | 50 | -361 | 5.60 |
| 20000 | 1.20 | .95  | .05 | 18050 | 1900 | 50 | .9416      | .0584 | 18069 | 2241 | 69 | 18050 | 2280 | 50 | -380 | 6.16 |
| 20000 | .80  | 1.00 | .00 | 20000 | 0    | 0  | 1.000<br>0 | .0000 | 20000 | 0    | 0  | 20000 | 0    | 0  | 0    | 6.16 |
| 20000 | .81  | 1.00 | .00 | 20000 | 0    | 0  | 1.000<br>0 | .0000 | 20000 | 0    | 0  | 20000 | 0    | 0  | 0    | 6.16 |
| 20000 | .82  | 1.00 | .00 | 20000 | 0    | 0  | 1.000<br>0 | .0000 | 20000 | 0    | 0  | 20000 | 0    | 0  | 0    | 6.16 |
| 20000 | .83  | 1.00 | .00 | 20000 | 0    | 0  | 1.000<br>0 | .0000 | 20000 | 0    | 0  | 20000 | 0    | 0  | 0    | 6.16 |
| 20000 | .84  | 1.00 | .00 | 20000 | 0    | 0  | 1.000<br>0 | .0000 | 20000 | 0    | 0  | 20000 | 0    | 0  | 0    | 6.16 |
| 20000 | .85  | 1.00 | .00 | 20000 | 0    | 0  | 1.000<br>0 | .0000 | 20000 | 0    | 0  | 20000 | 0    | 0  | 0    | 6.16 |
| 20000 | .86  | 1.00 | .00 | 20000 | 0    | 0  | 1.000<br>0 | .0000 | 20000 | 0    | 0  | 20000 | 0    | 0  | 0    | 6.16 |
| 20000 | .87  | 1.00 | .00 | 20000 | 0    | 0  | 1.000<br>0 | .0000 | 20000 | 0    | 0  | 20000 | 0    | 0  | 0    | 6.16 |
| 20000 | .88  | 1.00 | .00 | 20000 | 0    | 0  | 1.000<br>0 | .0000 | 20000 | 0    | 0  | 20000 | 0    | 0  | 0    | 6.16 |
| 20000 | .89  | 1.00 | .00 | 20000 | 0    | 0  | 1.000<br>0 | .0000 | 20000 | 0    | 0  | 20000 | 0    | 0  | 0    | 6.16 |
| 20000 | .90  | 1.00 | .00 | 20000 | 0    | 0  | 1.000<br>0 | .0000 | 20000 | 0    | 0  | 20000 | 0    | 0  | 0    | 6.16 |
| 20000 | .91  | 1.00 | .00 | 20000 | 0    | 0  | 1.000<br>0 | .0000 | 20000 | 0    | 0  | 20000 | 0    | 0  | 0    | 6.16 |
| 20000 | .92  | 1.00 | .00 | 20000 | 0    | 0  | 1.000<br>0 | .0000 | 20000 | 0    | 0  | 20000 | 0    | 0  | 0    | 6.16 |
| 20000 | .93  | 1.00 | .00 | 20000 | 0    | 0  | 1.000<br>0 | .0000 | 20000 | 0    | 0  | 20000 | 0    | 0  | 0    | 6.16 |
| 20000 | .94  | 1.00 | .00 | 20000 | 0    | 0  | 1.000<br>0 | .0000 | 20000 | 0    | 0  | 20000 | 0    | 0  | 0    | 6.16 |
| 20000 | .95  | 1.00 | .00 | 20000 | 0    | 0  | 1.000      | .0000 | 20000 | 0    | 0  | 20000 | 0    | 0  | 0    | 6.16 |



|       |      |      |     |       |   |   |            |       |       |   |   |       |   |   |   |      |
|-------|------|------|-----|-------|---|---|------------|-------|-------|---|---|-------|---|---|---|------|
|       |      |      |     |       |   |   | 0          |       |       |   |   |       |   |   |   |      |
| 20000 | .96  | 1.00 | .00 | 20000 | 0 | 0 | 1.000<br>0 | .0000 | 20000 | 0 | 0 | 20000 | 0 | 0 | 0 | 6.16 |
| 20000 | .97  | 1.00 | .00 | 20000 | 0 | 0 | 1.000<br>0 | .0000 | 20000 | 0 | 0 | 20000 | 0 | 0 | 0 | 6.16 |
| 20000 | .98  | 1.00 | .00 | 20000 | 0 | 0 | 1.000<br>0 | .0000 | 20000 | 0 | 0 | 20000 | 0 | 0 | 0 | 6.16 |
| 20000 | .99  | 1.00 | .00 | 20000 | 0 | 0 | 1.000<br>0 | .0000 | 20000 | 0 | 0 | 20000 | 0 | 0 | 0 | 6.16 |
| 20000 | 1.00 | 1.00 | .00 | 20000 | 0 | 0 | 1.000<br>0 | .0000 | 20000 | 0 | 0 | 20000 | 0 | 0 | 0 | 6.16 |
| 20000 | 1.01 | 1.00 | .00 | 20000 | 0 | 0 | 1.000<br>0 | .0000 | 20000 | 0 | 0 | 20000 | 0 | 0 | 0 | 6.16 |
| 20000 | 1.02 | 1.00 | .00 | 20000 | 0 | 0 | 1.000<br>0 | .0000 | 20000 | 0 | 0 | 20000 | 0 | 0 | 0 | 6.16 |
| 20000 | 1.03 | 1.00 | .00 | 20000 | 0 | 0 | 1.000<br>0 | .0000 | 20000 | 0 | 0 | 20000 | 0 | 0 | 0 | 6.16 |
| 20000 | 1.04 | 1.00 | .00 | 20000 | 0 | 0 | 1.000<br>0 | .0000 | 20000 | 0 | 0 | 20000 | 0 | 0 | 0 | 6.16 |
| 20000 | 1.05 | 1.00 | .00 | 20000 | 0 | 0 | 1.000<br>0 | .0000 | 20000 | 0 | 0 | 20000 | 0 | 0 | 0 | 6.16 |
| 20000 | 1.06 | 1.00 | .00 | 20000 | 0 | 0 | 1.000<br>0 | .0000 | 20000 | 0 | 0 | 20000 | 0 | 0 | 0 | 6.16 |
| 20000 | 1.07 | 1.00 | .00 | 20000 | 0 | 0 | 1.000<br>0 | .0000 | 20000 | 0 | 0 | 20000 | 0 | 0 | 0 | 6.16 |
| 20000 | 1.08 | 1.00 | .00 | 20000 | 0 | 0 | 1.000<br>0 | .0000 | 20000 | 0 | 0 | 20000 | 0 | 0 | 0 | 6.16 |
| 20000 | 1.09 | 1.00 | .00 | 20000 | 0 | 0 | 1.000<br>0 | .0000 | 20000 | 0 | 0 | 20000 | 0 | 0 | 0 | 6.16 |
| 20000 | 1.10 | 1.00 | .00 | 20000 | 0 | 0 | 1.000<br>0 | .0000 | 20000 | 0 | 0 | 20000 | 0 | 0 | 0 | 6.16 |
| 20000 | 1.11 | 1.00 | .00 | 20000 | 0 | 0 | 1.000<br>0 | .0000 | 20000 | 0 | 0 | 20000 | 0 | 0 | 0 | 6.16 |
| 20000 | 1.12 | 1.00 | .00 | 20000 | 0 | 0 | 1.000      | .0000 | 20000 | 0 | 0 | 20000 | 0 | 0 | 0 | 6.16 |

|       |      |      |     |       |      |       |            |       |       |      |       |       |      |       |     |       |
|-------|------|------|-----|-------|------|-------|------------|-------|-------|------|-------|-------|------|-------|-----|-------|
|       |      |      |     |       |      |       | 0          |       |       |      |       |       |      |       |     |       |
| 20000 | 1.13 | 1.00 | .00 | 20000 | 0    | 0     | 1.000<br>0 | .0000 | 20000 | 0    | 0     | 20000 | 0    | 0     | 0   | 6.16  |
| 20000 | 1.14 | 1.00 | .00 | 20000 | 0    | 0     | 1.000<br>0 | .0000 | 20000 | 0    | 0     | 20000 | 0    | 0     | 0   | 6.16  |
| 20000 | 1.15 | 1.00 | .00 | 20000 | 0    | 0     | 1.000<br>0 | .0000 | 20000 | 0    | 0     | 20000 | 0    | 0     | 0   | 6.16  |
| 20000 | 1.16 | 1.00 | .00 | 20000 | 0    | 0     | 1.000<br>0 | .0000 | 20000 | 0    | 0     | 20000 | 0    | 0     | 0   | 6.16  |
| 20000 | 1.17 | 1.00 | .00 | 20000 | 0    | 0     | 1.000<br>0 | .0000 | 20000 | 0    | 0     | 20000 | 0    | 0     | 0   | 6.16  |
| 20000 | 1.18 | 1.00 | .00 | 20000 | 0    | 0     | 1.000<br>0 | .0000 | 20000 | 0    | 0     | 20000 | 0    | 0     | 0   | 6.16  |
| 20000 | 1.19 | 1.00 | .00 | 20000 | 0    | 0     | 1.000<br>0 | .0000 | 20000 | 0    | 0     | 20000 | 0    | 0     | 0   | 6.16  |
| 20000 | 1.20 | 1.00 | .00 | 20000 | 0    | 0     | 1.000<br>0 | .0000 | 20000 | 0    | 0     | 20000 | 0    | 0     | 0   | 6.16  |
| 50000 | .80  | .05  | .95 | 125   | 4750 | 45125 | .0413      | .9587 | 84    | 3883 | 45084 | 125   | 3800 | 45125 | 950 | 22.30 |
| 50000 | .81  | .05  | .95 | 125   | 4750 | 45125 | .0417      | .9583 | 85    | 3927 | 45085 | 125   | 3848 | 45125 | 903 | 19.88 |
| 50000 | .82  | .05  | .95 | 125   | 4750 | 45125 | .0422      | .9578 | 87    | 3970 | 45087 | 125   | 3895 | 45125 | 855 | 17.63 |
| 50000 | .83  | .05  | .95 | 125   | 4750 | 45125 | .0426      | .9574 | 89    | 4014 | 45089 | 125   | 3943 | 45125 | 808 | 15.54 |
| 50000 | .84  | .05  | .95 | 125   | 4750 | 45125 | .0431      | .9569 | 91    | 4057 | 45091 | 125   | 3990 | 45125 | 760 | 13.61 |
| 50000 | .85  | .05  | .95 | 125   | 4750 | 45125 | .0435      | .9565 | 93    | 4101 | 45093 | 125   | 4038 | 45125 | 713 | 11.82 |
| 50000 | .86  | .05  | .95 | 125   | 4750 | 45125 | .0439      | .9561 | 95    | 4145 | 45095 | 125   | 4085 | 45125 | 665 | 10.18 |
| 50000 | .87  | .05  | .95 | 125   | 4750 | 45125 | .0444      | .9556 | 97    | 4188 | 45097 | 125   | 4133 | 45125 | 618 | 8.68  |
| 50000 | .88  | .05  | .95 | 125   | 4750 | 45125 | .0448      | .9552 | 99    | 4231 | 45099 | 125   | 4180 | 45125 | 570 | 7.32  |
| 50000 | .89  | .05  | .95 | 125   | 4750 | 45125 | .0452      | .9548 | 101   | 4275 | 45101 | 125   | 4228 | 45125 | 523 | 6.08  |
| 50000 | .90  | .05  | .95 | 125   | 4750 | 45125 | .0457      | .9543 | 103   | 4318 | 45103 | 125   | 4275 | 45125 | 475 | 4.97  |
| 50000 | .91  | .05  | .95 | 125   | 4750 | 45125 | .0461      | .9539 | 105   | 4362 | 45105 | 125   | 4323 | 45125 | 428 | 3.99  |
| 50000 | .92  | .05  | .95 | 125   | 4750 | 45125 | .0466      | .9534 | 108   | 4405 | 45108 | 125   | 4370 | 45125 | 380 | 3.12  |
| 50000 | .93  | .05  | .95 | 125   | 4750 | 45125 | .0470      | .9530 | 110   | 4448 | 45110 | 125   | 4418 | 45125 | 333 | 2.36  |
| 50000 | .94  | .05  | .95 | 125   | 4750 | 45125 | .0474      | .9526 | 112   | 4491 | 45112 | 125   | 4465 | 45125 | 285 | 1.72  |
| 50000 | .95  | .05  | .95 | 125   | 4750 | 45125 | .0479      | .9521 | 114   | 4535 | 45114 | 125   | 4513 | 45125 | 238 | 1.18  |

|       |      |     |     |     |      |       |       |       |     |      |       |     |      |       |      |       |
|-------|------|-----|-----|-----|------|-------|-------|-------|-----|------|-------|-----|------|-------|------|-------|
| 50000 | .96  | .05 | .95 | 125 | 4750 | 45125 | .0483 | .9517 | 116 | 4578 | 45116 | 125 | 4560 | 45125 | 190  | .75   |
| 50000 | .97  | .05 | .95 | 125 | 4750 | 45125 | .0487 | .9513 | 118 | 4621 | 45118 | 125 | 4608 | 45125 | 143  | .42   |
| 50000 | .98  | .05 | .95 | 125 | 4750 | 45125 | .0491 | .9509 | 121 | 4664 | 45121 | 125 | 4655 | 45125 | 95   | .18   |
| 50000 | .99  | .05 | .95 | 125 | 4750 | 45125 | .0496 | .9504 | 123 | 4707 | 45123 | 125 | 4703 | 45125 | 48   | .05   |
| 50000 | 1.00 | .05 | .95 | 125 | 4750 | 45125 | .0500 | .9500 | 125 | 4750 | 45125 | 125 | 4750 | 45125 | 0    | .00   |
| 50000 | 1.01 | .05 | .95 | 125 | 4750 | 45125 | .0504 | .9496 | 127 | 4793 | 45127 | 125 | 4798 | 45125 | -48  | .04   |
| 50000 | 1.02 | .05 | .95 | 125 | 4750 | 45125 | .0509 | .9491 | 130 | 4836 | 45130 | 125 | 4845 | 45125 | -95  | .18   |
| 50000 | 1.03 | .05 | .95 | 125 | 4750 | 45125 | .0513 | .9487 | 132 | 4879 | 45132 | 125 | 4893 | 45125 | -143 | .40   |
| 50000 | 1.04 | .05 | .95 | 125 | 4750 | 45125 | .0517 | .9483 | 134 | 4922 | 45134 | 125 | 4940 | 45125 | -190 | .70   |
| 50000 | 1.05 | .05 | .95 | 125 | 4750 | 45125 | .0521 | .9479 | 137 | 4964 | 45137 | 125 | 4988 | 45125 | -238 | 1.08  |
| 50000 | 1.06 | .05 | .95 | 125 | 4750 | 45125 | .0526 | .9474 | 139 | 5007 | 45139 | 125 | 5035 | 45125 | -285 | 1.54  |
| 50000 | 1.07 | .05 | .95 | 125 | 4750 | 45125 | .0530 | .9470 | 141 | 5050 | 45141 | 125 | 5083 | 45125 | -333 | 2.08  |
| 50000 | 1.08 | .05 | .95 | 125 | 4750 | 45125 | .0534 | .9466 | 144 | 5093 | 45144 | 125 | 5130 | 45125 | -380 | 2.70  |
| 50000 | 1.09 | .05 | .95 | 125 | 4750 | 45125 | .0538 | .9462 | 146 | 5135 | 45146 | 125 | 5178 | 45125 | -428 | 3.39  |
| 50000 | 1.10 | .05 | .95 | 125 | 4750 | 45125 | .0542 | .9458 | 148 | 5178 | 45148 | 125 | 5225 | 45125 | -475 | 4.15  |
| 50000 | 1.11 | .05 | .95 | 125 | 4750 | 45125 | .0547 | .9453 | 151 | 5221 | 45151 | 125 | 5273 | 45125 | -523 | 4.98  |
| 50000 | 1.12 | .05 | .95 | 125 | 4750 | 45125 | .0551 | .9449 | 153 | 5263 | 45153 | 125 | 5320 | 45125 | -570 | 5.88  |
| 50000 | 1.13 | .05 | .95 | 125 | 4750 | 45125 | .0555 | .9445 | 156 | 5306 | 45156 | 125 | 5368 | 45125 | -618 | 6.85  |
| 50000 | 1.14 | .05 | .95 | 125 | 4750 | 45125 | .0559 | .9441 | 158 | 5348 | 45158 | 125 | 5415 | 45125 | -665 | 7.88  |
| 50000 | 1.15 | .05 | .95 | 125 | 4750 | 45125 | .0563 | .9437 | 161 | 5391 | 45161 | 125 | 5463 | 45125 | -713 | 8.98  |
| 50000 | 1.16 | .05 | .95 | 125 | 4750 | 45125 | .0567 | .9433 | 163 | 5433 | 45163 | 125 | 5510 | 45125 | -760 | 10.14 |
| 50000 | 1.17 | .05 | .95 | 125 | 4750 | 45125 | .0572 | .9428 | 166 | 5476 | 45166 | 125 | 5558 | 45125 | -808 | 11.37 |
| 50000 | 1.18 | .05 | .95 | 125 | 4750 | 45125 | .0576 | .9424 | 169 | 5518 | 45169 | 125 | 5605 | 45125 | -855 | 12.66 |
| 50000 | 1.19 | .05 | .95 | 125 | 4750 | 45125 | .0580 | .9420 | 171 | 5560 | 45171 | 125 | 5653 | 45125 | -903 | 14.00 |
| 50000 | 1.20 | .05 | .95 | 125 | 4750 | 45125 | .0584 | .9416 | 174 | 5603 | 45174 | 125 | 5700 | 45125 | -950 | 15.41 |
| 50000 | .80  | .10 | .90 | 500 | 9000 | 40500 | .0851 | .9149 | 349 | 7502 | 40349 | 500 | 7200 | 40500 | 1800 | 78.35 |
| 50000 | .81  | .10 | .90 | 500 | 9000 | 40500 | .0858 | .9142 | 356 | 7578 | 40356 | 500 | 7290 | 40500 | 1710 | 69.95 |
| 50000 | .82  | .10 | .90 | 500 | 9000 | 40500 | .0866 | .9134 | 363 | 7654 | 40363 | 500 | 7380 | 40500 | 1620 | 62.11 |
| 50000 | .83  | .10 | .90 | 500 | 9000 | 40500 | .0874 | .9126 | 370 | 7730 | 40370 | 500 | 7470 | 40500 | 1530 | 54.81 |
| 50000 | .84  | .10 | .90 | 500 | 9000 | 40500 | .0881 | .9119 | 377 | 7806 | 40377 | 500 | 7560 | 40500 | 1440 | 48.05 |
| 50000 | .85  | .10 | .90 | 500 | 9000 | 40500 | .0889 | .9111 | 384 | 7881 | 40384 | 500 | 7650 | 40500 | 1350 | 41.80 |
| 50000 | .86  | .10 | .90 | 500 | 9000 | 40500 | .0897 | .9103 | 392 | 7956 | 40392 | 500 | 7740 | 40500 | 1260 | 36.05 |
| 50000 | .87  | .10 | .90 | 500 | 9000 | 40500 | .0904 | .9096 | 399 | 8032 | 40399 | 500 | 7830 | 40500 | 1170 | 30.77 |

|       |      |     |     |     |      |       |       |       |     |       |       |     |       |       |       |       |
|-------|------|-----|-----|-----|------|-------|-------|-------|-----|-------|-------|-----|-------|-------|-------|-------|
| 50000 | .88  | .10 | .90 | 500 | 9000 | 40500 | .0912 | .9088 | 407 | 8107  | 40407 | 500 | 7920  | 40500 | 1080  | 25.97 |
| 50000 | .89  | .10 | .90 | 500 | 9000 | 40500 | .0919 | .9081 | 414 | 8182  | 40414 | 500 | 8010  | 40500 | 990   | 21.61 |
| 50000 | .90  | .10 | .90 | 500 | 9000 | 40500 | .0927 | .9073 | 422 | 8257  | 40422 | 500 | 8100  | 40500 | 900   | 17.69 |
| 50000 | .91  | .10 | .90 | 500 | 9000 | 40500 | .0934 | .9066 | 429 | 8332  | 40429 | 500 | 8190  | 40500 | 810   | 14.19 |
| 50000 | .92  | .10 | .90 | 500 | 9000 | 40500 | .0942 | .9058 | 437 | 8406  | 40437 | 500 | 8280  | 40500 | 720   | 11.11 |
| 50000 | .93  | .10 | .90 | 500 | 9000 | 40500 | .0949 | .9051 | 445 | 8481  | 40445 | 500 | 8370  | 40500 | 630   | 8.43  |
| 50000 | .94  | .10 | .90 | 500 | 9000 | 40500 | .0956 | .9044 | 452 | 8555  | 40452 | 500 | 8460  | 40500 | 540   | 6.14  |
| 50000 | .95  | .10 | .90 | 500 | 9000 | 40500 | .0964 | .9036 | 460 | 8630  | 40460 | 500 | 8550  | 40500 | 450   | 4.23  |
| 50000 | .96  | .10 | .90 | 500 | 9000 | 40500 | .0971 | .9029 | 468 | 8704  | 40468 | 500 | 8640  | 40500 | 360   | 2.68  |
| 50000 | .97  | .10 | .90 | 500 | 9000 | 40500 | .0978 | .9022 | 476 | 8778  | 40476 | 500 | 8730  | 40500 | 270   | 1.50  |
| 50000 | .98  | .10 | .90 | 500 | 9000 | 40500 | .0986 | .9014 | 484 | 8852  | 40484 | 500 | 8820  | 40500 | 180   | .66   |
| 50000 | .99  | .10 | .90 | 500 | 9000 | 40500 | .0993 | .9007 | 492 | 8926  | 40492 | 500 | 8910  | 40500 | 90    | .16   |
| 50000 | 1.00 | .10 | .90 | 500 | 9000 | 40500 | .1000 | .9000 | 500 | 9000  | 40500 | 500 | 9000  | 40500 | 0     | .00   |
| 50000 | 1.01 | .10 | .90 | 500 | 9000 | 40500 | .1007 | .8993 | 508 | 9074  | 40508 | 500 | 9090  | 40500 | -90   | .16   |
| 50000 | 1.02 | .10 | .90 | 500 | 9000 | 40500 | .1014 | .8986 | 516 | 9147  | 40516 | 500 | 9180  | 40500 | -180  | .64   |
| 50000 | 1.03 | .10 | .90 | 500 | 9000 | 40500 | .1021 | .8979 | 525 | 9221  | 40525 | 500 | 9270  | 40500 | -270  | 1.42  |
| 50000 | 1.04 | .10 | .90 | 500 | 9000 | 40500 | .1029 | .8971 | 533 | 9294  | 40533 | 500 | 9360  | 40500 | -360  | 2.51  |
| 50000 | 1.05 | .10 | .90 | 500 | 9000 | 40500 | .1036 | .8964 | 541 | 9368  | 40541 | 500 | 9450  | 40500 | -450  | 3.89  |
| 50000 | 1.06 | .10 | .90 | 500 | 9000 | 40500 | .1043 | .8957 | 550 | 9441  | 40550 | 500 | 9540  | 40500 | -540  | 5.56  |
| 50000 | 1.07 | .10 | .90 | 500 | 9000 | 40500 | .1050 | .8950 | 558 | 9514  | 40558 | 500 | 9630  | 40500 | -630  | 7.51  |
| 50000 | 1.08 | .10 | .90 | 500 | 9000 | 40500 | .1057 | .8943 | 566 | 9587  | 40566 | 500 | 9720  | 40500 | -720  | 9.74  |
| 50000 | 1.09 | .10 | .90 | 500 | 9000 | 40500 | .1064 | .8936 | 575 | 9660  | 40575 | 500 | 9810  | 40500 | -810  | 12.24 |
| 50000 | 1.10 | .10 | .90 | 500 | 9000 | 40500 | .1071 | .8929 | 584 | 9733  | 40584 | 500 | 9900  | 40500 | -900  | 15.00 |
| 50000 | 1.11 | .10 | .90 | 500 | 9000 | 40500 | .1078 | .8922 | 592 | 9806  | 40592 | 500 | 9990  | 40500 | -990  | 18.02 |
| 50000 | 1.12 | .10 | .90 | 500 | 9000 | 40500 | .1085 | .8915 | 601 | 9878  | 40601 | 500 | 10080 | 40500 | -1080 | 21.30 |
| 50000 | 1.13 | .10 | .90 | 500 | 9000 | 40500 | .1091 | .8909 | 610 | 9951  | 40610 | 500 | 10170 | 40500 | -1170 | 24.82 |
| 50000 | 1.14 | .10 | .90 | 500 | 9000 | 40500 | .1098 | .8902 | 618 | 10023 | 40618 | 500 | 10260 | 40500 | -1260 | 28.59 |
| 50000 | 1.15 | .10 | .90 | 500 | 9000 | 40500 | .1105 | .8895 | 627 | 10096 | 40627 | 500 | 10350 | 40500 | -1350 | 32.60 |
| 50000 | 1.16 | .10 | .90 | 500 | 9000 | 40500 | .1112 | .8888 | 636 | 10168 | 40636 | 500 | 10440 | 40500 | -1440 | 36.84 |
| 50000 | 1.17 | .10 | .90 | 500 | 9000 | 40500 | .1119 | .8881 | 645 | 10240 | 40645 | 500 | 10530 | 40500 | -1530 | 41.31 |
| 50000 | 1.18 | .10 | .90 | 500 | 9000 | 40500 | .1126 | .8874 | 654 | 10312 | 40654 | 500 | 10620 | 40500 | -1620 | 46.01 |
| 50000 | 1.19 | .10 | .90 | 500 | 9000 | 40500 | .1132 | .8868 | 663 | 10384 | 40663 | 500 | 10710 | 40500 | -1710 | 50.93 |
| 50000 | 1.20 | .10 | .90 | 500 | 9000 | 40500 | .1139 | .8861 | 672 | 10456 | 40672 | 500 | 10800 | 40500 | -1800 | 56.07 |

|       |      |     |     |      |       |       |       |       |      |       |       |      |       |       |       |        |
|-------|------|-----|-----|------|-------|-------|-------|-------|------|-------|-------|------|-------|-------|-------|--------|
| 50000 | .80  | .15 | .85 | 1125 | 12750 | 36125 | .1312 | .8688 | 817  | 10817 | 35817 | 1125 | 10200 | 36125 | 2550  | 154.23 |
| 50000 | .81  | .15 | .85 | 1125 | 12750 | 36125 | .1322 | .8678 | 831  | 10915 | 35831 | 1125 | 10328 | 36125 | 2423  | 137.85 |
| 50000 | .82  | .15 | .85 | 1125 | 12750 | 36125 | .1332 | .8668 | 846  | 11013 | 35846 | 1125 | 10455 | 36125 | 2295  | 122.54 |
| 50000 | .83  | .15 | .85 | 1125 | 12750 | 36125 | .1341 | .8659 | 861  | 11111 | 35861 | 1125 | 10583 | 36125 | 2168  | 108.28 |
| 50000 | .84  | .15 | .85 | 1125 | 12750 | 36125 | .1351 | .8649 | 876  | 11209 | 35876 | 1125 | 10710 | 36125 | 2040  | 95.03  |
| 50000 | .85  | .15 | .85 | 1125 | 12750 | 36125 | .1361 | .8639 | 890  | 11307 | 35890 | 1125 | 10838 | 36125 | 1913  | 82.76  |
| 50000 | .86  | .15 | .85 | 1125 | 12750 | 36125 | .1370 | .8630 | 906  | 11404 | 35906 | 1125 | 10965 | 36125 | 1785  | 71.44  |
| 50000 | .87  | .15 | .85 | 1125 | 12750 | 36125 | .1380 | .8620 | 921  | 11501 | 35921 | 1125 | 11093 | 36125 | 1658  | 61.06  |
| 50000 | .88  | .15 | .85 | 1125 | 12750 | 36125 | .1390 | .8610 | 936  | 11598 | 35936 | 1125 | 11220 | 36125 | 1530  | 51.57  |
| 50000 | .89  | .15 | .85 | 1125 | 12750 | 36125 | .1399 | .8601 | 951  | 11695 | 35951 | 1125 | 11348 | 36125 | 1403  | 42.96  |
| 50000 | .90  | .15 | .85 | 1125 | 12750 | 36125 | .1408 | .8592 | 967  | 11792 | 35967 | 1125 | 11475 | 36125 | 1275  | 35.20  |
| 50000 | .91  | .15 | .85 | 1125 | 12750 | 36125 | .1418 | .8582 | 982  | 11889 | 35982 | 1125 | 11603 | 36125 | 1148  | 28.27  |
| 50000 | .92  | .15 | .85 | 1125 | 12750 | 36125 | .1427 | .8573 | 998  | 11985 | 35998 | 1125 | 11730 | 36125 | 1020  | 22.16  |
| 50000 | .93  | .15 | .85 | 1125 | 12750 | 36125 | .1436 | .8564 | 1013 | 12081 | 36013 | 1125 | 11858 | 36125 | 893   | 16.82  |
| 50000 | .94  | .15 | .85 | 1125 | 12750 | 36125 | .1446 | .8554 | 1029 | 12177 | 36029 | 1125 | 11985 | 36125 | 765   | 12.26  |
| 50000 | .95  | .15 | .85 | 1125 | 12750 | 36125 | .1455 | .8545 | 1045 | 12273 | 36045 | 1125 | 12113 | 36125 | 638   | 8.45   |
| 50000 | .96  | .15 | .85 | 1125 | 12750 | 36125 | .1464 | .8536 | 1061 | 12369 | 36061 | 1125 | 12240 | 36125 | 510   | 5.36   |
| 50000 | .97  | .15 | .85 | 1125 | 12750 | 36125 | .1473 | .8527 | 1077 | 12464 | 36077 | 1125 | 12368 | 36125 | 383   | 2.99   |
| 50000 | .98  | .15 | .85 | 1125 | 12750 | 36125 | .1482 | .8518 | 1093 | 12560 | 36093 | 1125 | 12495 | 36125 | 255   | 1.32   |
| 50000 | .99  | .15 | .85 | 1125 | 12750 | 36125 | .1491 | .8509 | 1109 | 12655 | 36109 | 1125 | 12623 | 36125 | 128   | .33    |
| 50000 | 1.00 | .15 | .85 | 1125 | 12750 | 36125 | .1500 | .8500 | 1125 | 12750 | 36125 | 1125 | 12750 | 36125 | 0     | .00    |
| 50000 | 1.01 | .15 | .85 | 1125 | 12750 | 36125 | .1509 | .8491 | 1141 | 12845 | 36141 | 1125 | 12878 | 36125 | -128  | .32    |
| 50000 | 1.02 | .15 | .85 | 1125 | 12750 | 36125 | .1518 | .8482 | 1158 | 12940 | 36158 | 1125 | 13005 | 36125 | -255  | 1.28   |
| 50000 | 1.03 | .15 | .85 | 1125 | 12750 | 36125 | .1527 | .8473 | 1174 | 13034 | 36174 | 1125 | 13133 | 36125 | -383  | 2.86   |
| 50000 | 1.04 | .15 | .85 | 1125 | 12750 | 36125 | .1535 | .8465 | 1191 | 13129 | 36191 | 1125 | 13260 | 36125 | -510  | 5.05   |
| 50000 | 1.05 | .15 | .85 | 1125 | 12750 | 36125 | .1544 | .8456 | 1207 | 13223 | 36207 | 1125 | 13388 | 36125 | -638  | 7.84   |
| 50000 | 1.06 | .15 | .85 | 1125 | 12750 | 36125 | .1553 | .8447 | 1224 | 13317 | 36224 | 1125 | 13515 | 36125 | -765  | 11.21  |
| 50000 | 1.07 | .15 | .85 | 1125 | 12750 | 36125 | .1561 | .8439 | 1241 | 13411 | 36241 | 1125 | 13643 | 36125 | -893  | 15.15  |
| 50000 | 1.08 | .15 | .85 | 1125 | 12750 | 36125 | .1570 | .8430 | 1258 | 13505 | 36258 | 1125 | 13770 | 36125 | -1020 | 19.66  |

|       |      |     |     |      |       |       |       |       |      |       |       |      |       |       |       |        |
|-------|------|-----|-----|------|-------|-------|-------|-------|------|-------|-------|------|-------|-------|-------|--------|
| 50000 | 1.09 | .15 | .85 | 1125 | 12750 | 36125 | .1579 | .8421 | 1274 | 13599 | 36274 | 1125 | 13898 | 36125 | -1148 | 24.71  |
| 50000 | 1.10 | .15 | .85 | 1125 | 12750 | 36125 | .1587 | .8413 | 1291 | 13692 | 36291 | 1125 | 14025 | 36125 | -1275 | 30.31  |
| 50000 | 1.11 | .15 | .85 | 1125 | 12750 | 36125 | .1595 | .8405 | 1309 | 13785 | 36309 | 1125 | 14153 | 36125 | -1403 | 36.43  |
| 50000 | 1.12 | .15 | .85 | 1125 | 12750 | 36125 | .1604 | .8396 | 1326 | 13879 | 36326 | 1125 | 14280 | 36125 | -1530 | 43.08  |
| 50000 | 1.13 | .15 | .85 | 1125 | 12750 | 36125 | .1612 | .8388 | 1343 | 13972 | 36343 | 1125 | 14408 | 36125 | -1658 | 50.23  |
| 50000 | 1.14 | .15 | .85 | 1125 | 12750 | 36125 | .1621 | .8379 | 1360 | 14065 | 36360 | 1125 | 14535 | 36125 | -1785 | 57.89  |
| 50000 | 1.15 | .15 | .85 | 1125 | 12750 | 36125 | .1629 | .8371 | 1377 | 14158 | 36377 | 1125 | 14663 | 36125 | -1913 | 66.04  |
| 50000 | 1.16 | .15 | .85 | 1125 | 12750 | 36125 | .1637 | .8363 | 1395 | 14250 | 36395 | 1125 | 14790 | 36125 | -2040 | 74.67  |
| 50000 | 1.17 | .15 | .85 | 1125 | 12750 | 36125 | .1645 | .8355 | 1412 | 14343 | 36412 | 1125 | 14918 | 36125 | -2168 | 83.78  |
| 50000 | 1.18 | .15 | .85 | 1125 | 12750 | 36125 | .1654 | .8346 | 1430 | 14435 | 36430 | 1125 | 15045 | 36125 | -2295 | 93.36  |
| 50000 | 1.19 | .15 | .85 | 1125 | 12750 | 36125 | .1662 | .8338 | 1448 | 14527 | 36448 | 1125 | 15173 | 36125 | -2423 | 103.39 |
| 50000 | 1.20 | .15 | .85 | 1125 | 12750 | 36125 | .1670 | .8330 | 1465 | 14619 | 36465 | 1125 | 15300 | 36125 | -2550 | 113.88 |
| 50000 | .80  | .20 | .80 | 2000 | 16000 | 32000 | .1795 | .8205 | 1508 | 13785 | 31508 | 2000 | 12800 | 32000 | 3200  | 238.78 |
| 50000 | .81  | .20 | .80 | 2000 | 16000 | 32000 | .1806 | .8194 | 1531 | 13897 | 31531 | 2000 | 12960 | 32000 | 3040  | 213.64 |
| 50000 | .82  | .20 | .80 | 2000 | 16000 | 32000 | .1817 | .8183 | 1555 | 14010 | 31555 | 2000 | 13120 | 32000 | 2880  | 190.12 |
| 50000 | .83  | .20 | .80 | 2000 | 16000 | 32000 | .1827 | .8173 | 1579 | 14122 | 31579 | 2000 | 13280 | 32000 | 2720  | 168.17 |
| 50000 | .84  | .20 | .80 | 2000 | 16000 | 32000 | .1838 | .8162 | 1603 | 14234 | 31603 | 2000 | 13440 | 32000 | 2560  | 147.73 |
| 50000 | .85  | .20 | .80 | 2000 | 16000 | 32000 | .1849 | .8151 | 1627 | 14346 | 31627 | 2000 | 13600 | 32000 | 2400  | 128.78 |
| 50000 | .86  | .20 | .80 | 2000 | 16000 | 32000 | .1859 | .8141 | 1651 | 14458 | 31651 | 2000 | 13760 | 32000 | 2240  | 111.28 |
| 50000 | .87  | .20 | .80 | 2000 | 16000 | 32000 | .1870 | .8130 | 1675 | 14569 | 31675 | 2000 | 13920 | 32000 | 2080  | 95.19  |
| 50000 | .88  | .20 | .80 | 2000 | 16000 | 32000 | .1880 | .8120 | 1700 | 14681 | 31700 | 2000 | 14080 | 32000 | 1920  | 80.47  |
| 50000 | .89  | .20 | .80 | 2000 | 16000 | 32000 | .1891 | .8109 | 1724 | 14792 | 31724 | 2000 | 14240 | 32000 | 1760  | 67.09  |
| 50000 | .90  | .20 | .80 | 2000 | 16000 | 32000 | .1901 | .8099 | 1749 | 14902 | 31749 | 2000 | 14400 | 32000 | 1600  | 55.03  |
| 50000 | .91  | .20 | .80 | 2000 | 16000 | 32000 | .1911 | .8089 | 1773 | 15013 | 31773 | 2000 | 14560 | 32000 | 1440  | 44.23  |

|       |      |     |     |      |       |       |       |       |      |       |       |      |       |       |       |        |
|-------|------|-----|-----|------|-------|-------|-------|-------|------|-------|-------|------|-------|-------|-------|--------|
| 50000 | .92  | .20 | .80 | 2000 | 16000 | 32000 | .1921 | .8079 | 1798 | 15124 | 31798 | 2000 | 14720 | 32000 | 1280  | 34.69  |
| 50000 | .93  | .20 | .80 | 2000 | 16000 | 32000 | .1931 | .8069 | 1823 | 15234 | 31823 | 2000 | 14880 | 32000 | 1120  | 26.36  |
| 50000 | .94  | .20 | .80 | 2000 | 16000 | 32000 | .1941 | .8059 | 1848 | 15344 | 31848 | 2000 | 15040 | 32000 | 960   | 19.23  |
| 50000 | .95  | .20 | .80 | 2000 | 16000 | 32000 | .1951 | .8049 | 1873 | 15454 | 31873 | 2000 | 15200 | 32000 | 800   | 13.26  |
| 50000 | .96  | .20 | .80 | 2000 | 16000 | 32000 | .1961 | .8039 | 1898 | 15563 | 31898 | 2000 | 15360 | 32000 | 640   | 8.42   |
| 50000 | .97  | .20 | .80 | 2000 | 16000 | 32000 | .1971 | .8029 | 1924 | 15673 | 31924 | 2000 | 15520 | 32000 | 480   | 4.70   |
| 50000 | .98  | .20 | .80 | 2000 | 16000 | 32000 | .1981 | .8019 | 1949 | 15782 | 31949 | 2000 | 15680 | 32000 | 320   | 2.08   |
| 50000 | .99  | .20 | .80 | 2000 | 16000 | 32000 | .1990 | .8010 | 1974 | 15891 | 31974 | 2000 | 15840 | 32000 | 160   | .52    |
| 50000 | 1.00 | .20 | .80 | 2000 | 16000 | 32000 | .2000 | .8000 | 2000 | 16000 | 32000 | 2000 | 16000 | 32000 | 0     | .00    |
| 50000 | 1.01 | .20 | .80 | 2000 | 16000 | 32000 | .2010 | .7990 | 2026 | 16109 | 32026 | 2000 | 16160 | 32000 | -160  | .51    |
| 50000 | 1.02 | .20 | .80 | 2000 | 16000 | 32000 | .2019 | .7981 | 2051 | 16217 | 32051 | 2000 | 16320 | 32000 | -320  | 2.02   |
| 50000 | 1.03 | .20 | .80 | 2000 | 16000 | 32000 | .2029 | .7971 | 2077 | 16326 | 32077 | 2000 | 16480 | 32000 | -480  | 4.52   |
| 50000 | 1.04 | .20 | .80 | 2000 | 16000 | 32000 | .2038 | .7962 | 2103 | 16434 | 32103 | 2000 | 16640 | 32000 | -640  | 7.98   |
| 50000 | 1.05 | .20 | .80 | 2000 | 16000 | 32000 | .2047 | .7953 | 2129 | 16542 | 32129 | 2000 | 16800 | 32000 | -800  | 12.38  |
| 50000 | 1.06 | .20 | .80 | 2000 | 16000 | 32000 | .2057 | .7943 | 2155 | 16650 | 32155 | 2000 | 16960 | 32000 | -960  | 17.72  |
| 50000 | 1.07 | .20 | .80 | 2000 | 16000 | 32000 | .2066 | .7934 | 2181 | 16757 | 32181 | 2000 | 17120 | 32000 | -1120 | 23.96  |
| 50000 | 1.08 | .20 | .80 | 2000 | 16000 | 32000 | .2075 | .7925 | 2208 | 16865 | 32208 | 2000 | 17280 | 32000 | -1280 | 31.10  |
| 50000 | 1.09 | .20 | .80 | 2000 | 16000 | 32000 | .2084 | .7916 | 2234 | 16972 | 32234 | 2000 | 17440 | 32000 | -1440 | 39.12  |
| 50000 | 1.10 | .20 | .80 | 2000 | 16000 | 32000 | .2093 | .7907 | 2260 | 17079 | 32260 | 2000 | 17600 | 32000 | -1600 | 48.00  |
| 50000 | 1.11 | .20 | .80 | 2000 | 16000 | 32000 | .2102 | .7898 | 2287 | 17186 | 32287 | 2000 | 17760 | 32000 | -1760 | 57.73  |
| 50000 | 1.12 | .20 | .80 | 2000 | 16000 | 32000 | .2111 | .7889 | 2314 | 17293 | 32314 | 2000 | 17920 | 32000 | -1920 | 68.29  |
| 50000 | 1.13 | .20 | .80 | 2000 | 16000 | 32000 | .2120 | .7880 | 2340 | 17399 | 32340 | 2000 | 18080 | 32000 | -2080 | 79.68  |
| 50000 | 1.14 | .20 | .80 | 2000 | 16000 | 32000 | .2129 | .7871 | 2367 | 17506 | 32367 | 2000 | 18240 | 32000 | -2240 | 91.86  |
| 50000 | 1.15 | .20 | .80 | 2000 | 16000 | 32000 | .2137 | .7863 | 2394 | 17612 | 32394 | 2000 | 18400 | 32000 | -2400 | 104.84 |
| 50000 | 1.16 | .20 | .80 | 2000 | 16000 | 32000 | .2146 | .7854 | 2421 | 17718 | 32421 | 2000 | 18560 | 32000 | -2560 | 118.59 |
| 50000 | 1.17 | .20 | .80 | 2000 | 16000 | 32000 | .2155 | .7845 | 2448 | 17824 | 32448 | 2000 | 18720 | 32000 | -2720 | 133.12 |
| 50000 | 1.18 | .20 | .80 | 2000 | 16000 | 32000 | .2163 | .7837 | 2475 | 17930 | 32475 | 2000 | 18880 | 32000 | -2880 | 148.39 |
| 50000 | 1.19 | .20 | .80 | 2000 | 16000 | 32000 | .2172 | .7828 | 2502 | 18036 | 32502 | 2000 | 19040 | 32000 | -3040 | 164.41 |

|       |      |     |     |      |       |       |       |       |      |       |       |      |       |       |       |        |
|-------|------|-----|-----|------|-------|-------|-------|-------|------|-------|-------|------|-------|-------|-------|--------|
| 50000 | 1.20 | .20 | .80 | 2000 | 16000 | 32000 | .2180 | .7820 | 2529 | 18141 | 32529 | 2000 | 19200 | 32000 | -3200 | 181.16 |
| 50000 | .80  | .25 | .75 | 3125 | 18750 | 28125 | .2297 | .7703 | 2441 | 16368 | 27441 | 3125 | 15000 | 28125 | 3750  | 323.17 |
| 50000 | .81  | .25 | .75 | 3125 | 18750 | 28125 | .2308 | .7692 | 2474 | 16489 | 27474 | 3125 | 15188 | 28125 | 3563  | 289.43 |
| 50000 | .82  | .25 | .75 | 3125 | 18750 | 28125 | .2319 | .7681 | 2507 | 16610 | 27507 | 3125 | 15375 | 28125 | 3375  | 257.79 |
| 50000 | .83  | .25 | .75 | 3125 | 18750 | 28125 | .2330 | .7670 | 2541 | 16731 | 27541 | 3125 | 15563 | 28125 | 3188  | 228.22 |
| 50000 | .84  | .25 | .75 | 3125 | 18750 | 28125 | .2340 | .7660 | 2574 | 16851 | 27574 | 3125 | 15750 | 28125 | 3000  | 200.66 |
| 50000 | .85  | .25 | .75 | 3125 | 18750 | 28125 | .2351 | .7649 | 2608 | 16971 | 27608 | 3125 | 15938 | 28125 | 2813  | 175.07 |
| 50000 | .86  | .25 | .75 | 3125 | 18750 | 28125 | .2361 | .7639 | 2642 | 17091 | 27642 | 3125 | 16125 | 28125 | 2625  | 151.40 |
| 50000 | .87  | .25 | .75 | 3125 | 18750 | 28125 | .2372 | .7628 | 2676 | 17211 | 27676 | 3125 | 16313 | 28125 | 2438  | 129.61 |
| 50000 | .88  | .25 | .75 | 3125 | 18750 | 28125 | .2382 | .7618 | 2710 | 17330 | 27710 | 3125 | 16500 | 28125 | 2250  | 109.65 |
| 50000 | .89  | .25 | .75 | 3125 | 18750 | 28125 | .2392 | .7608 | 2744 | 17450 | 27744 | 3125 | 16688 | 28125 | 2063  | 91.49  |
| 50000 | .90  | .25 | .75 | 3125 | 18750 | 28125 | .2403 | .7597 | 2778 | 17569 | 27778 | 3125 | 16875 | 28125 | 1875  | 75.09  |
| 50000 | .91  | .25 | .75 | 3125 | 18750 | 28125 | .2413 | .7587 | 2812 | 17688 | 27812 | 3125 | 17063 | 28125 | 1688  | 60.41  |
| 50000 | .92  | .25 | .75 | 3125 | 18750 | 28125 | .2423 | .7577 | 2847 | 17807 | 27847 | 3125 | 17250 | 28125 | 1500  | 47.40  |
| 50000 | .93  | .25 | .75 | 3125 | 18750 | 28125 | .2433 | .7567 | 2881 | 17925 | 27881 | 3125 | 17438 | 28125 | 1313  | 36.05  |
| 50000 | .94  | .25 | .75 | 3125 | 18750 | 28125 | .2442 | .7558 | 2916 | 18044 | 27916 | 3125 | 17625 | 28125 | 1125  | 26.31  |
| 50000 | .95  | .25 | .75 | 3125 | 18750 | 28125 | .2452 | .7548 | 2950 | 18162 | 27950 | 3125 | 17813 | 28125 | 938   | 18.15  |
| 50000 | .96  | .25 | .75 | 3125 | 18750 | 28125 | .2462 | .7538 | 2985 | 18280 | 27985 | 3125 | 18000 | 28125 | 750   | 11.54  |
| 50000 | .97  | .25 | .75 | 3125 | 18750 | 28125 | .2472 | .7528 | 3020 | 18398 | 28020 | 3125 | 18188 | 28125 | 563   | 6.45   |
| 50000 | .98  | .25 | .75 | 3125 | 18750 | 28125 | .2481 | .7519 | 3055 | 18515 | 28055 | 3125 | 18375 | 28125 | 375   | 2.85   |
| 50000 | .99  | .25 | .75 | 3125 | 18750 | 28125 | .2491 | .7509 | 3090 | 18633 | 28090 | 3125 | 18563 | 28125 | 188   | .71    |
| 50000 | 1.00 | .25 | .75 | 3125 | 18750 | 28125 | .2500 | .7500 | 3125 | 18750 | 28125 | 3125 | 18750 | 28125 | 0     | .00    |
| 50000 | 1.01 | .25 | .75 | 3125 | 18750 | 28125 | .2509 | .7491 | 3160 | 18867 | 28160 | 3125 | 18938 | 28125 | -188  | .70    |
| 50000 | 1.02 | .25 | .75 | 3125 | 18750 | 28125 | .2519 | .7481 | 3195 | 18984 | 28195 | 3125 | 19125 | 28125 | -375  | 2.78   |



|       |      |     |     |      |       |       |       |       |      |       |       |      |       |       |       |        |
|-------|------|-----|-----|------|-------|-------|-------|-------|------|-------|-------|------|-------|-------|-------|--------|
| 50000 | 1.03 | .25 | .75 | 3125 | 18750 | 28125 | .2528 | .7472 | 3231 | 19101 | 28231 | 3125 | 19313 | 28125 | -563  | 6.21   |
| 50000 | 1.04 | .25 | .75 | 3125 | 18750 | 28125 | .2537 | .7463 | 3266 | 19217 | 28266 | 3125 | 19500 | 28125 | -750  | 10.98  |
| 50000 | 1.05 | .25 | .75 | 3125 | 18750 | 28125 | .2546 | .7454 | 3302 | 19334 | 28302 | 3125 | 19688 | 28125 | -938  | 17.05  |
| 50000 | 1.06 | .25 | .75 | 3125 | 18750 | 28125 | .2555 | .7445 | 3337 | 19450 | 28337 | 3125 | 19875 | 28125 | -1125 | 24.41  |
| 50000 | 1.07 | .25 | .75 | 3125 | 18750 | 28125 | .2564 | .7436 | 3373 | 19566 | 28373 | 3125 | 20063 | 28125 | -1313 | 33.03  |
| 50000 | 1.08 | .25 | .75 | 3125 | 18750 | 28125 | .2573 | .7427 | 3409 | 19682 | 28409 | 3125 | 20250 | 28125 | -1500 | 42.88  |
| 50000 | 1.09 | .25 | .75 | 3125 | 18750 | 28125 | .2582 | .7418 | 3445 | 19798 | 28445 | 3125 | 20438 | 28125 | -1688 | 53.96  |
| 50000 | 1.10 | .25 | .75 | 3125 | 18750 | 28125 | .2590 | .7410 | 3481 | 19913 | 28481 | 3125 | 20625 | 28125 | -1875 | 66.24  |
| 50000 | 1.11 | .25 | .75 | 3125 | 18750 | 28125 | .2599 | .7401 | 3517 | 20029 | 28517 | 3125 | 20813 | 28125 | -2063 | 79.70  |
| 50000 | 1.12 | .25 | .75 | 3125 | 18750 | 28125 | .2608 | .7392 | 3553 | 20144 | 28553 | 3125 | 21000 | 28125 | -2250 | 94.32  |
| 50000 | 1.13 | .25 | .75 | 3125 | 18750 | 28125 | .2616 | .7384 | 3589 | 20259 | 28589 | 3125 | 21188 | 28125 | -2438 | 110.08 |
| 50000 | 1.14 | .25 | .75 | 3125 | 18750 | 28125 | .2625 | .7375 | 3625 | 20374 | 28625 | 3125 | 21375 | 28125 | -2625 | 126.96 |
| 50000 | 1.15 | .25 | .75 | 3125 | 18750 | 28125 | .2633 | .7367 | 3662 | 20489 | 28662 | 3125 | 21563 | 28125 | -2813 | 144.95 |
| 50000 | 1.16 | .25 | .75 | 3125 | 18750 | 28125 | .2642 | .7358 | 3698 | 20604 | 28698 | 3125 | 21750 | 28125 | -3000 | 164.03 |
| 50000 | 1.17 | .25 | .75 | 3125 | 18750 | 28125 | .2650 | .7350 | 3735 | 20718 | 28735 | 3125 | 21938 | 28125 | -3188 | 184.18 |
| 50000 | 1.18 | .25 | .75 | 3125 | 18750 | 28125 | .2658 | .7342 | 3771 | 20833 | 28771 | 3125 | 22125 | 28125 | -3375 | 205.39 |
| 50000 | 1.19 | .25 | .75 | 3125 | 18750 | 28125 | .2666 | .7334 | 3808 | 20947 | 28808 | 3125 | 22313 | 28125 | -3563 | 227.63 |
| 50000 | 1.20 | .25 | .75 | 3125 | 18750 | 28125 | .2674 | .7326 | 3844 | 21061 | 28844 | 3125 | 22500 | 28125 | -3750 | 250.91 |
| 50000 | .80  | .30 | .70 | 4500 | 21000 | 24500 | .2817 | .7183 | 3633 | 18533 | 23633 | 4500 | 16800 | 24500 | 4200  | 400.55 |
| 50000 | .81  | .30 | .70 | 4500 | 21000 | 24500 | .2827 | .7173 | 3676 | 18658 | 23676 | 4500 | 17010 | 24500 | 3990  | 359.00 |
| 50000 | .82  | .30 | .70 | 4500 | 21000 | 24500 | .2836 | .7164 | 3719 | 18783 | 23719 | 4500 | 17220 | 24500 | 3780  | 320.00 |
| 50000 | .83  | .30 | .70 | 4500 | 21000 | 24500 | .2846 | .7154 | 3761 | 18907 | 23761 | 4500 | 17430 | 24500 | 3570  | 283.50 |

|       |      |     |     |      |       |       |       |       |      |       |       |      |       |       |       |        |
|-------|------|-----|-----|------|-------|-------|-------|-------|------|-------|-------|------|-------|-------|-------|--------|
| 50000 | .84  | .30 | .70 | 4500 | 21000 | 24500 | .2856 | .7144 | 3804 | 19032 | 23804 | 4500 | 17640 | 24500 | 3360  | 249.44 |
| 50000 | .85  | .30 | .70 | 4500 | 21000 | 24500 | .2866 | .7134 | 3847 | 19156 | 23847 | 4500 | 17850 | 24500 | 3150  | 217.78 |
| 50000 | .86  | .30 | .70 | 4500 | 21000 | 24500 | .2875 | .7125 | 3890 | 19280 | 23890 | 4500 | 18060 | 24500 | 2940  | 188.46 |
| 50000 | .87  | .30 | .70 | 4500 | 21000 | 24500 | .2884 | .7116 | 3933 | 19404 | 23933 | 4500 | 18270 | 24500 | 2730  | 161.44 |
| 50000 | .88  | .30 | .70 | 4500 | 21000 | 24500 | .2894 | .7106 | 3976 | 19528 | 23976 | 4500 | 18480 | 24500 | 2520  | 136.67 |
| 50000 | .89  | .30 | .70 | 4500 | 21000 | 24500 | .2903 | .7097 | 4019 | 19651 | 24019 | 4500 | 18690 | 24500 | 2310  | 114.11 |
| 50000 | .90  | .30 | .70 | 4500 | 21000 | 24500 | .2912 | .7088 | 4063 | 19775 | 24063 | 4500 | 18900 | 24500 | 2100  | 93.71  |
| 50000 | .91  | .30 | .70 | 4500 | 21000 | 24500 | .2921 | .7079 | 4106 | 19898 | 24106 | 4500 | 19110 | 24500 | 1890  | 75.43  |
| 50000 | .92  | .30 | .70 | 4500 | 21000 | 24500 | .2930 | .7070 | 4150 | 20021 | 24150 | 4500 | 19320 | 24500 | 1680  | 59.22  |
| 50000 | .93  | .30 | .70 | 4500 | 21000 | 24500 | .2939 | .7061 | 4193 | 20144 | 24193 | 4500 | 19530 | 24500 | 1470  | 45.06  |
| 50000 | .94  | .30 | .70 | 4500 | 21000 | 24500 | .2948 | .7052 | 4237 | 20267 | 24237 | 4500 | 19740 | 24500 | 1260  | 32.91  |
| 50000 | .95  | .30 | .70 | 4500 | 21000 | 24500 | .2957 | .7043 | 4280 | 20389 | 24280 | 4500 | 19950 | 24500 | 1050  | 22.71  |
| 50000 | .96  | .30 | .70 | 4500 | 21000 | 24500 | .2966 | .7034 | 4324 | 20512 | 24324 | 4500 | 20160 | 24500 | 840   | 14.45  |
| 50000 | .97  | .30 | .70 | 4500 | 21000 | 24500 | .2974 | .7026 | 4368 | 20634 | 24368 | 4500 | 20370 | 24500 | 630   | 8.08   |
| 50000 | .98  | .30 | .70 | 4500 | 21000 | 24500 | .2983 | .7017 | 4412 | 20756 | 24412 | 4500 | 20580 | 24500 | 420   | 3.57   |
| 50000 | .99  | .30 | .70 | 4500 | 21000 | 24500 | .2992 | .7008 | 4456 | 20878 | 24456 | 4500 | 20790 | 24500 | 210   | .89    |
| 50000 | 1.00 | .30 | .70 | 4500 | 21000 | 24500 | .3000 | .7000 | 4500 | 21000 | 24500 | 4500 | 21000 | 24500 | 0     | .00    |
| 50000 | 1.01 | .30 | .70 | 4500 | 21000 | 24500 | .3008 | .6992 | 4544 | 21122 | 24544 | 4500 | 21210 | 24500 | -210  | .88    |
| 50000 | 1.02 | .30 | .70 | 4500 | 21000 | 24500 | .3017 | .6983 | 4588 | 21243 | 24588 | 4500 | 21420 | 24500 | -420  | 3.49   |
| 50000 | 1.03 | .30 | .70 | 4500 | 21000 | 24500 | .3025 | .6975 | 4633 | 21365 | 24633 | 4500 | 21630 | 24500 | -630  | 7.80   |
| 50000 | 1.04 | .30 | .70 | 4500 | 21000 | 24500 | .3033 | .6967 | 4677 | 21486 | 24677 | 4500 | 21840 | 24500 | -840  | 13.79  |
| 50000 | 1.05 | .30 | .70 | 4500 | 21000 | 24500 | .3041 | .6959 | 4721 | 21607 | 24721 | 4500 | 22050 | 24500 | -1050 | 21.43  |
| 50000 | 1.06 | .30 | .70 | 4500 | 21000 | 24500 | .3049 | .6951 | 4766 | 21728 | 24766 | 4500 | 22260 | 24500 | -1260 | 30.69  |
| 50000 | 1.07 | .30 | .70 | 4500 | 21000 | 24500 | .3057 | .6943 | 4810 | 21849 | 24810 | 4500 | 22470 | 24500 | -1470 | 41.55  |
| 50000 | 1.08 | .30 | .70 | 4500 | 21000 | 24500 | .3065 | .6935 | 4855 | 21970 | 24855 | 4500 | 22680 | 24500 | -1680 | 53.97  |
| 50000 | 1.09 | .30 | .70 | 4500 | 21000 | 24500 | .3073 | .6927 | 4900 | 22091 | 24900 | 4500 | 22890 | 24500 | -1890 | 67.93  |
| 50000 | 1.10 | .30 | .70 | 4500 | 21000 | 24500 | .3081 | .6919 | 4944 | 22211 | 24944 | 4500 | 23100 | 24500 | -2100 | 83.42  |

|       |      |     |     |      |       |       |       |       |      |       |       |      |       |       |       |        |
|-------|------|-----|-----|------|-------|-------|-------|-------|------|-------|-------|------|-------|-------|-------|--------|
| 50000 | 1.11 | .30 | .70 | 4500 | 21000 | 24500 | .3088 | .6912 | 4989 | 22332 | 24989 | 4500 | 23310 | 24500 | -2310 | 100.40 |
| 50000 | 1.12 | .30 | .70 | 4500 | 21000 | 24500 | .3096 | .6904 | 5034 | 22452 | 25034 | 4500 | 23520 | 24500 | -2520 | 118.86 |
| 50000 | 1.13 | .30 | .70 | 4500 | 21000 | 24500 | .3104 | .6896 | 5079 | 22572 | 25079 | 4500 | 23730 | 24500 | -2730 | 138.76 |
| 50000 | 1.14 | .30 | .70 | 4500 | 21000 | 24500 | .3111 | .6889 | 5124 | 22692 | 25124 | 4500 | 23940 | 24500 | -2940 | 160.09 |
| 50000 | 1.15 | .30 | .70 | 4500 | 21000 | 24500 | .3119 | .6881 | 5169 | 22812 | 25169 | 4500 | 24150 | 24500 | -3150 | 182.83 |
| 50000 | 1.16 | .30 | .70 | 4500 | 21000 | 24500 | .3126 | .6874 | 5214 | 22932 | 25214 | 4500 | 24360 | 24500 | -3360 | 206.95 |
| 50000 | 1.17 | .30 | .70 | 4500 | 21000 | 24500 | .3133 | .6867 | 5259 | 23052 | 25259 | 4500 | 24570 | 24500 | -3570 | 232.44 |
| 50000 | 1.18 | .30 | .70 | 4500 | 21000 | 24500 | .3141 | .6859 | 5304 | 23171 | 25304 | 4500 | 24780 | 24500 | -3780 | 259.27 |
| 50000 | 1.19 | .30 | .70 | 4500 | 21000 | 24500 | .3148 | .6852 | 5350 | 23291 | 25350 | 4500 | 24990 | 24500 | -3990 | 287.43 |
| 50000 | 1.20 | .30 | .70 | 4500 | 21000 | 24500 | .3155 | .6845 | 5395 | 23410 | 25395 | 4500 | 25200 | 24500 | -4200 | 316.90 |
| 50000 | .80  | .35 | .65 | 6125 | 22750 | 21125 | .3350 | .6650 | 5100 | 20250 | 20100 | 6125 | 18200 | 21125 | 4550  | 465.69 |
| 50000 | .81  | .35 | .65 | 6125 | 22750 | 21125 | .3358 | .6642 | 5151 | 20376 | 20151 | 6125 | 18428 | 21125 | 4323  | 417.64 |
| 50000 | .82  | .35 | .65 | 6125 | 22750 | 21125 | .3366 | .6634 | 5202 | 20502 | 20202 | 6125 | 18655 | 21125 | 4095  | 372.49 |
| 50000 | .83  | .35 | .65 | 6125 | 22750 | 21125 | .3374 | .6626 | 5252 | 20628 | 20252 | 6125 | 18883 | 21125 | 3868  | 330.19 |
| 50000 | .84  | .35 | .65 | 6125 | 22750 | 21125 | .3382 | .6618 | 5303 | 20753 | 20303 | 6125 | 19110 | 21125 | 3640  | 290.68 |
| 50000 | .85  | .35 | .65 | 6125 | 22750 | 21125 | .3390 | .6610 | 5354 | 20879 | 20354 | 6125 | 19338 | 21125 | 3413  | 253.92 |
| 50000 | .86  | .35 | .65 | 6125 | 22750 | 21125 | .3398 | .6602 | 5405 | 21004 | 20405 | 6125 | 19565 | 21125 | 3185  | 219.86 |

|       |      |     |     |      |       |       |       |       |      |       |       |      |       |       |       |        |
|-------|------|-----|-----|------|-------|-------|-------|-------|------|-------|-------|------|-------|-------|-------|--------|
| 50000 | .87  | .35 | .65 | 6125 | 22750 | 21125 | .3406 | .6594 | 5456 | 21130 | 20456 | 6125 | 19793 | 21125 | 2958  | 188.43 |
| 50000 | .88  | .35 | .65 | 6125 | 22750 | 21125 | .3413 | .6587 | 5507 | 21255 | 20507 | 6125 | 20020 | 21125 | 2730  | 159.60 |
| 50000 | .89  | .35 | .65 | 6125 | 22750 | 21125 | .3421 | .6579 | 5559 | 21380 | 20559 | 6125 | 20248 | 21125 | 2503  | 133.32 |
| 50000 | .90  | .35 | .65 | 6125 | 22750 | 21125 | .3428 | .6572 | 5610 | 21505 | 20610 | 6125 | 20475 | 21125 | 2275  | 109.53 |
| 50000 | .91  | .35 | .65 | 6125 | 22750 | 21125 | .3436 | .6564 | 5661 | 21630 | 20661 | 6125 | 20703 | 21125 | 2048  | 88.20  |
| 50000 | .92  | .35 | .65 | 6125 | 22750 | 21125 | .3443 | .6557 | 5712 | 21755 | 20712 | 6125 | 20930 | 21125 | 1820  | 69.29  |
| 50000 | .93  | .35 | .65 | 6125 | 22750 | 21125 | .3451 | .6549 | 5764 | 21880 | 20764 | 6125 | 21158 | 21125 | 1593  | 52.74  |
| 50000 | .94  | .35 | .65 | 6125 | 22750 | 21125 | .3458 | .6542 | 5815 | 22004 | 20815 | 6125 | 21385 | 21125 | 1365  | 38.53  |
| 50000 | .95  | .35 | .65 | 6125 | 22750 | 21125 | .3465 | .6535 | 5867 | 22129 | 20867 | 6125 | 21613 | 21125 | 1138  | 26.61  |
| 50000 | .96  | .35 | .65 | 6125 | 22750 | 21125 | .3472 | .6528 | 5918 | 22253 | 20918 | 6125 | 21840 | 21125 | 910   | 16.93  |
| 50000 | .97  | .35 | .65 | 6125 | 22750 | 21125 | .3479 | .6521 | 5970 | 22378 | 20970 | 6125 | 22068 | 21125 | 683   | 9.47   |
| 50000 | .98  | .35 | .65 | 6125 | 22750 | 21125 | .3486 | .6514 | 6022 | 22502 | 21022 | 6125 | 22295 | 21125 | 455   | 4.19   |
| 50000 | .99  | .35 | .65 | 6125 | 22750 | 21125 | .3493 | .6507 | 6073 | 22626 | 21073 | 6125 | 22523 | 21125 | 228   | 1.04   |
| 50000 | 1.00 | .35 | .65 | 6125 | 22750 | 21125 | .3500 | .6500 | 6125 | 22750 | 21125 | 6125 | 22750 | 21125 | 0     | .00    |
| 50000 | 1.01 | .35 | .65 | 6125 | 22750 | 21125 | .3507 | .6493 | 6177 | 22874 | 21177 | 6125 | 22978 | 21125 | -228  | 1.03   |
| 50000 | 1.02 | .35 | .65 | 6125 | 22750 | 21125 | .3514 | .6486 | 6229 | 22998 | 21229 | 6125 | 23205 | 21125 | -455  | 4.10   |
| 50000 | 1.03 | .35 | .65 | 6125 | 22750 | 21125 | .3520 | .6480 | 6280 | 23122 | 21280 | 6125 | 23433 | 21125 | -683  | 9.17   |
| 50000 | 1.04 | .35 | .65 | 6125 | 22750 | 21125 | .3527 | .6473 | 6332 | 23245 | 21332 | 6125 | 23660 | 21125 | -910  | 16.21  |
| 50000 | 1.05 | .35 | .65 | 6125 | 22750 | 21125 | .3533 | .6467 | 6384 | 23369 | 21384 | 6125 | 23888 | 21125 | -1138 | 25.19  |
| 50000 | 1.06 | .35 | .65 | 6125 | 22750 | 21125 | .3540 | .6460 | 6436 | 23492 | 21436 | 6125 | 24115 | 21125 | -1365 | 36.09  |
| 50000 | 1.07 | .35 | .65 | 6125 | 22750 | 21125 | .3546 | .6454 | 6488 | 23616 | 21488 | 6125 | 24343 | 21125 | -1593 | 48.87  |
| 50000 | 1.08 | .35 | .65 | 6125 | 22750 | 21125 | .3553 | .6447 | 6540 | 23739 | 21540 | 6125 | 24570 | 21125 | -1820 | 63.50  |
| 50000 | 1.09 | .35 | .65 | 6125 | 22750 | 21125 | .3559 | .6441 | 6593 | 23862 | 21593 | 6125 | 24798 | 21125 | -2048 | 79.95  |
| 50000 | 1.10 | .35 | .65 | 6125 | 22750 | 21125 | .3565 | .6435 | 6645 | 23985 | 21645 | 6125 | 25025 | 21125 | -2275 | 98.20  |
| 50000 | 1.11 | .35 | .65 | 6125 | 22750 | 21125 | .3571 | .6429 | 6697 | 24108 | 21697 | 6125 | 25253 | 21125 | -2503 | 118.22 |
| 50000 | 1.12 | .35 | .65 | 6125 | 22750 | 21125 | .3578 | .6422 | 6749 | 24231 | 21749 | 6125 | 25480 | 21125 | -2730 | 139.99 |
| 50000 | 1.13 | .35 | .65 | 6125 | 22750 | 21125 | .3584 | .6416 | 6802 | 24354 | 21802 | 6125 | 25708 | 21125 | -2958 | 163.4  |

|       |      |     |     |      |       |       |       |       |      |       |       |      |       |       |       |        |
|-------|------|-----|-----|------|-------|-------|-------|-------|------|-------|-------|------|-------|-------|-------|--------|
|       |      |     |     |      |       |       |       |       |      |       |       |      |       |       |       | 7      |
| 50000 | 1.14 | .35 | .65 | 6125 | 22750 | 21125 | .3590 | .6410 | 6854 | 24477 | 21854 | 6125 | 25935 | 21125 | -3185 | 188.64 |
| 50000 | 1.15 | .35 | .65 | 6125 | 22750 | 21125 | .3596 | .6404 | 6906 | 24600 | 21906 | 6125 | 26163 | 21125 | -3413 | 215.48 |
| 50000 | 1.16 | .35 | .65 | 6125 | 22750 | 21125 | .3602 | .6398 | 6959 | 24723 | 21959 | 6125 | 26390 | 21125 | -3640 | 243.97 |
| 50000 | 1.17 | .35 | .65 | 6125 | 22750 | 21125 | .3608 | .6392 | 7011 | 24845 | 22011 | 6125 | 26618 | 21125 | -3868 | 274.07 |
| 50000 | 1.18 | .35 | .65 | 6125 | 22750 | 21125 | .3614 | .6386 | 7064 | 24968 | 22064 | 6125 | 26845 | 21125 | -4095 | 305.78 |
| 50000 | 1.19 | .35 | .65 | 6125 | 22750 | 21125 | .3619 | .6381 | 7116 | 25090 | 22116 | 6125 | 27073 | 21125 | -4323 | 339.05 |
| 50000 | 1.20 | .35 | .65 | 6125 | 22750 | 21125 | .3625 | .6375 | 7169 | 25213 | 22169 | 6125 | 27300 | 21125 | -4550 | 373.89 |
| 50000 | .80  | .40 | .60 | 8000 | 24000 | 18000 | .3894 | .6106 | 6853 | 21494 | 16853 | 8000 | 19200 | 18000 | 4800  | 514.78 |
| 50000 | .81  | .40 | .60 | 8000 | 24000 | 18000 | .3900 | .6100 | 6910 | 21620 | 16910 | 8000 | 19440 | 18000 | 4560  | 461.86 |
| 50000 | .82  | .40 | .60 | 8000 | 24000 | 18000 | .3905 | .6095 | 6967 | 21745 | 16967 | 8000 | 19680 | 18000 | 4320  | 412.11 |
| 50000 | .83  | .40 | .60 | 8000 | 24000 | 18000 | .3911 | .6089 | 7024 | 21871 | 17024 | 8000 | 19920 | 18000 | 4080  | 365.46 |
| 50000 | .84  | .40 | .60 | 8000 | 24000 | 18000 | .3917 | .6083 | 7082 | 21997 | 17082 | 8000 | 20160 | 18000 | 3840  | 321.87 |
| 50000 | .85  | .40 | .60 | 8000 | 24000 | 18000 | .3922 | .6078 | 7139 | 22122 | 17139 | 8000 | 20400 | 18000 | 3600  | 281.27 |
| 50000 | .86  | .40 | .60 | 8000 | 24000 | 18000 | .3928 | .6072 | 7196 | 22248 | 17196 | 8000 | 20640 | 18000 | 3360  | 243.63 |
| 50000 | .87  | .40 | .60 | 8000 | 24000 | 18000 | .3933 | .6067 | 7253 | 22373 | 17253 | 8000 | 20880 | 18000 | 3120  | 208.88 |
| 50000 | .88  | .40 | .60 | 8000 | 24000 | 18000 | .3939 | .6061 | 7311 | 22499 | 17311 | 8000 | 21120 | 18000 | 2880  | 176.98 |
| 50000 | .89  | .40 | .60 | 8000 | 24000 | 18000 | .3944 | .6056 | 7368 | 22624 | 17368 | 8000 | 21360 | 18000 | 2640  | 147.8  |

|       |      |     |     |      |       |       |       |       |      |       |       |      |       |       |       |        |
|-------|------|-----|-----|------|-------|-------|-------|-------|------|-------|-------|------|-------|-------|-------|--------|
|       |      |     |     |      |       |       |       |       |      |       |       |      |       |       |       | 9      |
| 50000 | .90  | .40 | .60 | 8000 | 24000 | 18000 | .3950 | .6050 | 7425 | 22750 | 17425 | 8000 | 21600 | 18000 | 2400  | 121.55 |
| 50000 | .91  | .40 | .60 | 8000 | 24000 | 18000 | .3955 | .6045 | 7483 | 22875 | 17483 | 8000 | 21840 | 18000 | 2160  | 97.91  |
| 50000 | .92  | .40 | .60 | 8000 | 24000 | 18000 | .3960 | .6040 | 7540 | 23000 | 17540 | 8000 | 22080 | 18000 | 1920  | 76.94  |
| 50000 | .93  | .40 | .60 | 8000 | 24000 | 18000 | .3965 | .6035 | 7597 | 23125 | 17597 | 8000 | 22320 | 18000 | 1680  | 58.59  |
| 50000 | .94  | .40 | .60 | 8000 | 24000 | 18000 | .3970 | .6030 | 7655 | 23250 | 17655 | 8000 | 22560 | 18000 | 1440  | 42.81  |
| 50000 | .95  | .40 | .60 | 8000 | 24000 | 18000 | .3975 | .6025 | 7712 | 23375 | 17712 | 8000 | 22800 | 18000 | 1200  | 29.57  |
| 50000 | .96  | .40 | .60 | 8000 | 24000 | 18000 | .3980 | .6020 | 7770 | 23500 | 17770 | 8000 | 23040 | 18000 | 960   | 18.82  |
| 50000 | .97  | .40 | .60 | 8000 | 24000 | 18000 | .3985 | .6015 | 7827 | 23625 | 17827 | 8000 | 23280 | 18000 | 720   | 10.53  |
| 50000 | .98  | .40 | .60 | 8000 | 24000 | 18000 | .3990 | .6010 | 7885 | 23750 | 17885 | 8000 | 23520 | 18000 | 480   | 4.66   |
| 50000 | .99  | .40 | .60 | 8000 | 24000 | 18000 | .3995 | .6005 | 7942 | 23875 | 17942 | 8000 | 23760 | 18000 | 240   | 1.16   |
| 50000 | 1.00 | .40 | .60 | 8000 | 24000 | 18000 | .4000 | .6000 | 8000 | 24000 | 18000 | 8000 | 24000 | 18000 | 0     | .00    |
| 50000 | 1.01 | .40 | .60 | 8000 | 24000 | 18000 | .4005 | .5995 | 8058 | 24125 | 18058 | 8000 | 24240 | 18000 | -240  | 1.15   |
| 50000 | 1.02 | .40 | .60 | 8000 | 24000 | 18000 | .4010 | .5990 | 8115 | 24250 | 18115 | 8000 | 24480 | 18000 | -480  | 4.56   |
| 50000 | 1.03 | .40 | .60 | 8000 | 24000 | 18000 | .4014 | .5986 | 8173 | 24374 | 18173 | 8000 | 24720 | 18000 | -720  | 10.21  |
| 50000 | 1.04 | .40 | .60 | 8000 | 24000 | 18000 | .4019 | .5981 | 8231 | 24499 | 18231 | 8000 | 24960 | 18000 | -960  | 18.06  |
| 50000 | 1.05 | .40 | .60 | 8000 | 24000 | 18000 | .4023 | .5977 | 8288 | 24623 | 18288 | 8000 | 25200 | 18000 | -1200 | 28.07  |
| 50000 | 1.06 | .40 | .60 | 8000 | 24000 | 18000 | .4028 | .5972 | 8346 | 24748 | 18346 | 8000 | 25440 | 18000 | -1440 | 40.22  |
| 50000 | 1.07 | .40 | .60 | 8000 | 24000 | 18000 | .4033 | .5967 | 8404 | 24873 | 18404 | 8000 | 25680 | 18000 | -1680 | 54.47  |
| 50000 | 1.08 | .40 | .60 | 8000 | 24000 | 18000 | .4037 | .5963 | 8462 | 24997 | 18462 | 8000 | 25920 | 18000 | -1920 | 70.79  |
| 50000 | 1.09 | .40 | .60 | 8000 | 24000 | 18000 | .4041 | .5959 | 8519 | 25121 | 18519 | 8000 | 26160 | 18000 | -2160 | 89.15  |
| 50000 | 1.10 | .40 | .60 | 8000 | 24000 | 18000 | .4046 | .5954 | 8577 | 25246 | 18577 | 8000 | 26400 | 18000 | -2400 | 109.53 |
| 50000 | 1.11 | .40 | .60 | 8000 | 24000 | 18000 | .4050 | .5950 | 8635 | 25370 | 18635 | 8000 | 26640 | 18000 | -2640 | 131.88 |
| 50000 | 1.12 | .40 | .60 | 8000 | 24000 | 18000 | .4054 | .5946 | 8693 | 25494 | 18693 | 8000 | 26880 | 18000 | -2880 | 156.18 |
| 50000 | 1.13 | .40 | .60 | 8000 | 24000 | 18000 | .4059 | .5941 | 8751 | 25619 | 18751 | 8000 | 27120 | 18000 | -3120 | 182.41 |
| 50000 | 1.14 | .40 | .60 | 8000 | 24000 | 18000 | .4063 | .5937 | 8809 | 25743 | 18809 | 8000 | 27360 | 18000 | -3360 | 210.54 |
| 50000 | 1.15 | .40 | .60 | 8000 | 24000 | 18000 | .4067 | .5933 | 8866 | 25867 | 18866 | 8000 | 27600 | 18000 | -3600 | 240.5  |

|       |      |     |     |       |       |       |       |       |      |       |       |       |       |       |       |        |
|-------|------|-----|-----|-------|-------|-------|-------|-------|------|-------|-------|-------|-------|-------|-------|--------|
|       |      |     |     |       |       |       |       |       |      |       |       |       |       |       |       | 4      |
| 50000 | 1.16 | .40 | .60 | 8000  | 24000 | 18000 | .4071 | .5929 | 8924 | 25991 | 18924 | 8000  | 27840 | 18000 | -3840 | 272.38 |
| 50000 | 1.17 | .40 | .60 | 8000  | 24000 | 18000 | .4075 | .5925 | 8982 | 26115 | 18982 | 8000  | 28080 | 18000 | -4080 | 306.03 |
| 50000 | 1.18 | .40 | .60 | 8000  | 24000 | 18000 | .4080 | .5920 | 9040 | 26240 | 19040 | 8000  | 28320 | 18000 | -4320 | 341.48 |
| 50000 | 1.19 | .40 | .60 | 8000  | 24000 | 18000 | .4084 | .5916 | 9098 | 26364 | 19098 | 8000  | 28560 | 18000 | -4560 | 378.70 |
| 50000 | 1.20 | .40 | .60 | 8000  | 24000 | 18000 | .4088 | .5912 | 9156 | 26488 | 19156 | 8000  | 28800 | 18000 | -4800 | 417.66 |
| 50000 | .80  | .45 | .55 | 10125 | 24750 | 15125 | .4445 | .5555 | 8901 | 22248 | 13901 | 10125 | 19800 | 15125 | 4950  | 545.24 |
| 50000 | .81  | .45 | .55 | 10125 | 24750 | 15125 | .4448 | .5552 | 8962 | 22373 | 13962 | 10125 | 20048 | 15125 | 4703  | 489.32 |
| 50000 | .82  | .45 | .55 | 10125 | 24750 | 15125 | .4451 | .5549 | 9023 | 22498 | 14023 | 10125 | 20295 | 15125 | 4455  | 436.72 |
| 50000 | .83  | .45 | .55 | 10125 | 24750 | 15125 | .4454 | .5546 | 9085 | 22623 | 14085 | 10125 | 20543 | 15125 | 4208  | 387.38 |
| 50000 | .84  | .45 | .55 | 10125 | 24750 | 15125 | .4457 | .5543 | 9146 | 22748 | 14146 | 10125 | 20790 | 15125 | 3960  | 341.25 |
| 50000 | .85  | .45 | .55 | 10125 | 24750 | 15125 | .4460 | .5540 | 9207 | 22874 | 14207 | 10125 | 21038 | 15125 | 3713  | 298.28 |
| 50000 | .86  | .45 | .55 | 10125 | 24750 | 15125 | .4463 | .5537 | 9268 | 22999 | 14268 | 10125 | 21285 | 15125 | 3465  | 258.42 |
| 50000 | .87  | .45 | .55 | 10125 | 24750 | 15125 | .4466 | .5534 | 9329 | 23124 | 14329 | 10125 | 21533 | 15125 | 3218  | 221.62 |
| 50000 | .88  | .45 | .55 | 10125 | 24750 | 15125 | .4468 | .5532 | 9390 | 23249 | 14390 | 10125 | 21780 | 15125 | 2970  | 187.81 |
| 50000 | .89  | .45 | .55 | 10125 | 24750 | 15125 | .4471 | .5529 | 9452 | 23374 | 14452 | 10125 | 22028 | 15125 | 2723  | 156.97 |
| 50000 | .90  | .45 | .55 | 10125 | 24750 | 15125 | .4474 | .5526 | 9513 | 23499 | 14513 | 10125 | 22275 | 15125 | 2475  | 129.04 |
| 50000 | .91  | .45 | .55 | 10125 | 24750 | 15125 | .4477 | .5523 | 9574 | 23625 | 14574 | 10125 | 22523 | 15125 | 2228  | 103.9  |

|       |      |     |     |       |       |       |       |       |       |       |       |       |       |       |       |        |
|-------|------|-----|-----|-------|-------|-------|-------|-------|-------|-------|-------|-------|-------|-------|-------|--------|
|       |      |     |     |       |       |       |       |       |       |       |       |       |       |       |       | 6      |
| 50000 | .92  | .45 | .55 | 10125 | 24750 | 15125 | .4479 | .5521 | 9635  | 23750 | 14635 | 10125 | 22770 | 15125 | 1980  | 81.71  |
| 50000 | .93  | .45 | .55 | 10125 | 24750 | 15125 | .4482 | .5518 | 9696  | 23875 | 14696 | 10125 | 23018 | 15125 | 1733  | 62.23  |
| 50000 | .94  | .45 | .55 | 10125 | 24750 | 15125 | .4485 | .5515 | 9758  | 24000 | 14758 | 10125 | 23265 | 15125 | 1485  | 45.48  |
| 50000 | .95  | .45 | .55 | 10125 | 24750 | 15125 | .4487 | .5513 | 9819  | 24125 | 14819 | 10125 | 23513 | 15125 | 1238  | 31.42  |
| 50000 | .96  | .45 | .55 | 10125 | 24750 | 15125 | .4490 | .5510 | 9880  | 24250 | 14880 | 10125 | 23760 | 15125 | 990   | 20.01  |
| 50000 | .97  | .45 | .55 | 10125 | 24750 | 15125 | .4492 | .5508 | 9941  | 24375 | 14941 | 10125 | 24008 | 15125 | 743   | 11.20  |
| 50000 | .98  | .45 | .55 | 10125 | 24750 | 15125 | .4495 | .5505 | 10002 | 24500 | 15002 | 10125 | 24255 | 15125 | 495   | 4.95   |
| 50000 | .99  | .45 | .55 | 10125 | 24750 | 15125 | .4498 | .5502 | 10064 | 24625 | 15064 | 10125 | 24503 | 15125 | 248   | 1.23   |
| 50000 | 1.00 | .45 | .55 | 10125 | 24750 | 15125 | .4500 | .5500 | 10125 | 24750 | 15125 | 10125 | 24750 | 15125 | 0     | .00    |
| 50000 | 1.01 | .45 | .55 | 10125 | 24750 | 15125 | .4502 | .5498 | 10186 | 24875 | 15186 | 10125 | 24998 | 15125 | -248  | 1.22   |
| 50000 | 1.02 | .45 | .55 | 10125 | 24750 | 15125 | .4505 | .5495 | 10248 | 25000 | 15248 | 10125 | 25245 | 15125 | -495  | 4.85   |
| 50000 | 1.03 | .45 | .55 | 10125 | 24750 | 15125 | .4507 | .5493 | 10309 | 25125 | 15309 | 10125 | 25493 | 15125 | -743  | 10.86  |
| 50000 | 1.04 | .45 | .55 | 10125 | 24750 | 15125 | .4510 | .5490 | 10370 | 25250 | 15370 | 10125 | 25740 | 15125 | -990  | 19.21  |
| 50000 | 1.05 | .45 | .55 | 10125 | 24750 | 15125 | .4512 | .5488 | 10431 | 25375 | 15431 | 10125 | 25988 | 15125 | -1238 | 29.87  |
| 50000 | 1.06 | .45 | .55 | 10125 | 24750 | 15125 | .4514 | .5486 | 10493 | 25500 | 15493 | 10125 | 26235 | 15125 | -1485 | 42.81  |
| 50000 | 1.07 | .45 | .55 | 10125 | 24750 | 15125 | .4517 | .5483 | 10554 | 25625 | 15554 | 10125 | 26483 | 15125 | -1733 | 57.98  |
| 50000 | 1.08 | .45 | .55 | 10125 | 24750 | 15125 | .4519 | .5481 | 10615 | 25750 | 15615 | 10125 | 26730 | 15125 | -1980 | 75.37  |
| 50000 | 1.09 | .45 | .55 | 10125 | 24750 | 15125 | .4521 | .5479 | 10677 | 25874 | 15677 | 10125 | 26978 | 15125 | -2228 | 94.92  |
| 50000 | 1.10 | .45 | .55 | 10125 | 24750 | 15125 | .4524 | .5476 | 10738 | 25999 | 15738 | 10125 | 27225 | 15125 | -2475 | 116.63 |
| 50000 | 1.11 | .45 | .55 | 10125 | 24750 | 15125 | .4526 | .5474 | 10799 | 26124 | 15799 | 10125 | 27473 | 15125 | -2723 | 140.45 |
| 50000 | 1.12 | .45 | .55 | 10125 | 24750 | 15125 | .4528 | .5472 | 10860 | 26249 | 15860 | 10125 | 27720 | 15125 | -2970 | 166.35 |
| 50000 | 1.13 | .45 | .55 | 10125 | 24750 | 15125 | .4530 | .5470 | 10922 | 26374 | 15922 | 10125 | 27968 | 15125 | -3218 | 194.31 |
| 50000 | 1.14 | .45 | .55 | 10125 | 24750 | 15125 | .4532 | .5468 | 10983 | 26499 | 15983 | 10125 | 28215 | 15125 | -3465 | 224.29 |
| 50000 | 1.15 | .45 | .55 | 10125 | 24750 | 15125 | .4535 | .5465 | 11044 | 26624 | 16044 | 10125 | 28463 | 15125 | -3713 | 256.27 |
| 50000 | 1.16 | .45 | .55 | 10125 | 24750 | 15125 | .4537 | .5463 | 11106 | 26748 | 16106 | 10125 | 28710 | 15125 | -3960 | 290.22 |



|       |      |     |     |       |       |       |       |       |       |       |       |       |       |       |       |            |
|-------|------|-----|-----|-------|-------|-------|-------|-------|-------|-------|-------|-------|-------|-------|-------|------------|
| 50000 | 1.17 | .45 | .55 | 10125 | 24750 | 15125 | .4539 | .5461 | 11167 | 26873 | 16167 | 10125 | 28958 | 15125 | -4208 | 326.1<br>1 |
| 50000 | 1.18 | .45 | .55 | 10125 | 24750 | 15125 | .4541 | .5459 | 11229 | 26998 | 16229 | 10125 | 29205 | 15125 | -4455 | 363.9<br>1 |
| 50000 | 1.19 | .45 | .55 | 10125 | 24750 | 15125 | .4543 | .5457 | 11290 | 27123 | 16290 | 10125 | 29453 | 15125 | -4703 | 403.6<br>1 |
| 50000 | 1.20 | .45 | .55 | 10125 | 24750 | 15125 | .4545 | .5455 | 11351 | 27248 | 16351 | 10125 | 29700 | 15125 | -4950 | 445.1<br>7 |
| 50000 | .80  | .50 | .50 | 12500 | 25000 | 12500 | .5000 | .5000 | 11250 | 22500 | 11250 | 12500 | 20000 | 12500 | 5000  | 555.5<br>6 |
| 50000 | .81  | .50 | .50 | 12500 | 25000 | 12500 | .5000 | .5000 | 11313 | 22625 | 11313 | 12500 | 20250 | 12500 | 4750  | 498.6<br>2 |
| 50000 | .82  | .50 | .50 | 12500 | 25000 | 12500 | .5000 | .5000 | 11375 | 22750 | 11375 | 12500 | 20500 | 12500 | 4500  | 445.0<br>5 |
| 50000 | .83  | .50 | .50 | 12500 | 25000 | 12500 | .5000 | .5000 | 11438 | 22875 | 11438 | 12500 | 20750 | 12500 | 4250  | 394.8<br>1 |
| 50000 | .84  | .50 | .50 | 12500 | 25000 | 12500 | .5000 | .5000 | 11500 | 23000 | 11500 | 12500 | 21000 | 12500 | 4000  | 347.8<br>3 |
| 50000 | .85  | .50 | .50 | 12500 | 25000 | 12500 | .5000 | .5000 | 11563 | 23125 | 11563 | 12500 | 21250 | 12500 | 3750  | 304.0<br>5 |
| 50000 | .86  | .50 | .50 | 12500 | 25000 | 12500 | .5000 | .5000 | 11625 | 23250 | 11625 | 12500 | 21500 | 12500 | 3500  | 263.4<br>4 |
| 50000 | .87  | .50 | .50 | 12500 | 25000 | 12500 | .5000 | .5000 | 11688 | 23375 | 11688 | 12500 | 21750 | 12500 | 3250  | 225.9<br>4 |
| 50000 | .88  | .50 | .50 | 12500 | 25000 | 12500 | .5000 | .5000 | 11750 | 23500 | 11750 | 12500 | 22000 | 12500 | 3000  | 191.4<br>9 |
| 50000 | .89  | .50 | .50 | 12500 | 25000 | 12500 | .5000 | .5000 | 11813 | 23625 | 11813 | 12500 | 22250 | 12500 | 2750  | 160.0<br>5 |
| 50000 | .90  | .50 | .50 | 12500 | 25000 | 12500 | .5000 | .5000 | 11875 | 23750 | 11875 | 12500 | 22500 | 12500 | 2500  | 131.5<br>8 |
| 50000 | .91  | .50 | .50 | 12500 | 25000 | 12500 | .5000 | .5000 | 11938 | 23875 | 11938 | 12500 | 22750 | 12500 | 2250  | 106.0<br>2 |
| 50000 | .92  | .50 | .50 | 12500 | 25000 | 12500 | .5000 | .5000 | 12000 | 24000 | 12000 | 12500 | 23000 | 12500 | 2000  | 83.33      |
| 50000 | .93  | .50 | .50 | 12500 | 25000 | 12500 | .5000 | .5000 | 12063 | 24125 | 12063 | 12500 | 23250 | 12500 | 1750  | 63.47      |

|       |      |     |     |       |       |       |       |       |       |       |       |       |       |       |       |        |
|-------|------|-----|-----|-------|-------|-------|-------|-------|-------|-------|-------|-------|-------|-------|-------|--------|
| 50000 | .94  | .50 | .50 | 12500 | 25000 | 12500 | .5000 | .5000 | 12125 | 24250 | 12125 | 12500 | 23500 | 12500 | 1500  | 46.39  |
| 50000 | .95  | .50 | .50 | 12500 | 25000 | 12500 | .5000 | .5000 | 12188 | 24375 | 12188 | 12500 | 23750 | 12500 | 1250  | 32.05  |
| 50000 | .96  | .50 | .50 | 12500 | 25000 | 12500 | .5000 | .5000 | 12250 | 24500 | 12250 | 12500 | 24000 | 12500 | 1000  | 20.41  |
| 50000 | .97  | .50 | .50 | 12500 | 25000 | 12500 | .5000 | .5000 | 12313 | 24625 | 12313 | 12500 | 24250 | 12500 | 750   | 11.42  |
| 50000 | .98  | .50 | .50 | 12500 | 25000 | 12500 | .5000 | .5000 | 12375 | 24750 | 12375 | 12500 | 24500 | 12500 | 500   | 5.05   |
| 50000 | .99  | .50 | .50 | 12500 | 25000 | 12500 | .5000 | .5000 | 12438 | 24875 | 12438 | 12500 | 24750 | 12500 | 250   | 1.26   |
| 50000 | 1.00 | .50 | .50 | 12500 | 25000 | 12500 | .5000 | .5000 | 12500 | 25000 | 12500 | 12500 | 25000 | 12500 | 0     | .00    |
| 50000 | 1.01 | .50 | .50 | 12500 | 25000 | 12500 | .5000 | .5000 | 12563 | 25125 | 12563 | 12500 | 25250 | 12500 | -250  | 1.24   |
| 50000 | 1.02 | .50 | .50 | 12500 | 25000 | 12500 | .5000 | .5000 | 12625 | 25250 | 12625 | 12500 | 25500 | 12500 | -500  | 4.95   |
| 50000 | 1.03 | .50 | .50 | 12500 | 25000 | 12500 | .5000 | .5000 | 12688 | 25375 | 12688 | 12500 | 25750 | 12500 | -750  | 11.08  |
| 50000 | 1.04 | .50 | .50 | 12500 | 25000 | 12500 | .5000 | .5000 | 12750 | 25500 | 12750 | 12500 | 26000 | 12500 | -1000 | 19.61  |
| 50000 | 1.05 | .50 | .50 | 12500 | 25000 | 12500 | .5000 | .5000 | 12813 | 25625 | 12813 | 12500 | 26250 | 12500 | -1250 | 30.49  |
| 50000 | 1.06 | .50 | .50 | 12500 | 25000 | 12500 | .5000 | .5000 | 12875 | 25750 | 12875 | 12500 | 26500 | 12500 | -1500 | 43.69  |
| 50000 | 1.07 | .50 | .50 | 12500 | 25000 | 12500 | .5000 | .5000 | 12938 | 25875 | 12938 | 12500 | 26750 | 12500 | -1750 | 59.18  |
| 50000 | 1.08 | .50 | .50 | 12500 | 25000 | 12500 | .5000 | .5000 | 13000 | 26000 | 13000 | 12500 | 27000 | 12500 | -2000 | 76.92  |
| 50000 | 1.09 | .50 | .50 | 12500 | 25000 | 12500 | .5000 | .5000 | 13063 | 26125 | 13063 | 12500 | 27250 | 12500 | -2250 | 96.89  |
| 50000 | 1.10 | .50 | .50 | 12500 | 25000 | 12500 | .5000 | .5000 | 13125 | 26250 | 13125 | 12500 | 27500 | 12500 | -2500 | 119.05 |
| 50000 | 1.11 | .50 | .50 | 12500 | 25000 | 12500 | .5000 | .5000 | 13188 | 26375 | 13188 | 12500 | 27750 | 12500 | -2750 | 143.36 |
| 50000 | 1.12 | .50 | .50 | 12500 | 25000 | 12500 | .5000 | .5000 | 13250 | 26500 | 13250 | 12500 | 28000 | 12500 | -3000 | 169.81 |
| 50000 | 1.13 | .50 | .50 | 12500 | 25000 | 12500 | .5000 | .5000 | 13313 | 26625 | 13313 | 12500 | 28250 | 12500 | -3250 | 198.36 |
| 50000 | 1.14 | .50 | .50 | 12500 | 25000 | 12500 | .5000 | .5000 | 13375 | 26750 | 13375 | 12500 | 28500 | 12500 | -3500 | 228.97 |
| 50000 | 1.15 | .50 | .50 | 12500 | 25000 | 12500 | .5000 | .5000 | 13438 | 26875 | 13438 | 12500 | 28750 | 12500 | -3750 | 261.63 |
| 50000 | 1.16 | .50 | .50 | 12500 | 25000 | 12500 | .5000 | .5000 | 13500 | 27000 | 13500 | 12500 | 29000 | 12500 | -4000 | 296.30 |
| 50000 | 1.17 | .50 | .50 | 12500 | 25000 | 12500 | .5000 | .5000 | 13563 | 27125 | 13563 | 12500 | 29250 | 12500 | -4250 | 332.95 |
| 50000 | 1.18 | .50 | .50 | 12500 | 25000 | 12500 | .5000 | .5000 | 13625 | 27250 | 13625 | 12500 | 29500 | 12500 | -4500 | 371.5  |

|       |      |     |     |       |       |       |       |       |       |       |       |       |       |       |       |        |
|-------|------|-----|-----|-------|-------|-------|-------|-------|-------|-------|-------|-------|-------|-------|-------|--------|
|       |      |     |     |       |       |       |       |       |       |       |       |       |       |       |       | 6      |
| 50000 | 1.19 | .50 | .50 | 12500 | 25000 | 12500 | .5000 | .5000 | 13688 | 27375 | 13688 | 12500 | 29750 | 12500 | -4750 | 412.10 |
| 50000 | 1.20 | .50 | .50 | 12500 | 25000 | 12500 | .5000 | .5000 | 13750 | 27500 | 13750 | 12500 | 30000 | 12500 | -5000 | 454.55 |
| 50000 | .80  | .55 | .45 | 15125 | 24750 | 10125 | .5555 | .4445 | 13901 | 22248 | 8901  | 15125 | 19800 | 10125 | 4950  | 545.24 |
| 50000 | .81  | .55 | .45 | 15125 | 24750 | 10125 | .5552 | .4448 | 13962 | 22373 | 8962  | 15125 | 20048 | 10125 | 4703  | 489.32 |
| 50000 | .82  | .55 | .45 | 15125 | 24750 | 10125 | .5549 | .4451 | 14023 | 22498 | 9023  | 15125 | 20295 | 10125 | 4455  | 436.72 |
| 50000 | .83  | .55 | .45 | 15125 | 24750 | 10125 | .5546 | .4454 | 14085 | 22623 | 9085  | 15125 | 20543 | 10125 | 4208  | 387.38 |
| 50000 | .84  | .55 | .45 | 15125 | 24750 | 10125 | .5543 | .4457 | 14146 | 22748 | 9146  | 15125 | 20790 | 10125 | 3960  | 341.25 |
| 50000 | .85  | .55 | .45 | 15125 | 24750 | 10125 | .5540 | .4460 | 14207 | 22874 | 9207  | 15125 | 21038 | 10125 | 3713  | 298.28 |
| 50000 | .86  | .55 | .45 | 15125 | 24750 | 10125 | .5537 | .4463 | 14268 | 22999 | 9268  | 15125 | 21285 | 10125 | 3465  | 258.42 |
| 50000 | .87  | .55 | .45 | 15125 | 24750 | 10125 | .5534 | .4466 | 14329 | 23124 | 9329  | 15125 | 21533 | 10125 | 3218  | 221.62 |
| 50000 | .88  | .55 | .45 | 15125 | 24750 | 10125 | .5532 | .4468 | 14390 | 23249 | 9390  | 15125 | 21780 | 10125 | 2970  | 187.81 |
| 50000 | .89  | .55 | .45 | 15125 | 24750 | 10125 | .5529 | .4471 | 14452 | 23374 | 9452  | 15125 | 22028 | 10125 | 2723  | 156.97 |
| 50000 | .90  | .55 | .45 | 15125 | 24750 | 10125 | .5526 | .4474 | 14513 | 23499 | 9513  | 15125 | 22275 | 10125 | 2475  | 129.04 |
| 50000 | .91  | .55 | .45 | 15125 | 24750 | 10125 | .5523 | .4477 | 14574 | 23625 | 9574  | 15125 | 22523 | 10125 | 2228  | 103.96 |
| 50000 | .92  | .55 | .45 | 15125 | 24750 | 10125 | .5521 | .4479 | 14635 | 23750 | 9635  | 15125 | 22770 | 10125 | 1980  | 81.71  |
| 50000 | .93  | .55 | .45 | 15125 | 24750 | 10125 | .5518 | .4482 | 14696 | 23875 | 9696  | 15125 | 23018 | 10125 | 1733  | 62.23  |
| 50000 | .94  | .55 | .45 | 15125 | 24750 | 10125 | .5515 | .4485 | 14758 | 24000 | 9758  | 15125 | 23265 | 10125 | 1485  | 45.48  |
| 50000 | .95  | .55 | .45 | 15125 | 24750 | 10125 | .5513 | .4487 | 14819 | 24125 | 9819  | 15125 | 23513 | 10125 | 1238  | 31.42  |
| 50000 | .96  | .55 | .45 | 15125 | 24750 | 10125 | .5510 | .4490 | 14880 | 24250 | 9880  | 15125 | 23760 | 10125 | 990   | 20.01  |

|       |      |     |     |       |       |       |       |       |       |       |       |       |       |       |       |        |
|-------|------|-----|-----|-------|-------|-------|-------|-------|-------|-------|-------|-------|-------|-------|-------|--------|
| 50000 | .97  | .55 | .45 | 15125 | 24750 | 10125 | .5508 | .4492 | 14941 | 24375 | 9941  | 15125 | 24008 | 10125 | 743   | 11.20  |
| 50000 | .98  | .55 | .45 | 15125 | 24750 | 10125 | .5505 | .4495 | 15002 | 24500 | 10002 | 15125 | 24255 | 10125 | 495   | 4.95   |
| 50000 | .99  | .55 | .45 | 15125 | 24750 | 10125 | .5502 | .4498 | 15064 | 24625 | 10064 | 15125 | 24503 | 10125 | 248   | 1.23   |
| 50000 | 1.00 | .55 | .45 | 15125 | 24750 | 10125 | .5500 | .4500 | 15125 | 24750 | 10125 | 15125 | 24750 | 10125 | 0     | .00    |
| 50000 | 1.01 | .55 | .45 | 15125 | 24750 | 10125 | .5498 | .4502 | 15186 | 24875 | 10186 | 15125 | 24998 | 10125 | -248  | 1.22   |
| 50000 | 1.02 | .55 | .45 | 15125 | 24750 | 10125 | .5495 | .4505 | 15248 | 25000 | 10248 | 15125 | 25245 | 10125 | -495  | 4.85   |
| 50000 | 1.03 | .55 | .45 | 15125 | 24750 | 10125 | .5493 | .4507 | 15309 | 25125 | 10309 | 15125 | 25493 | 10125 | -743  | 10.86  |
| 50000 | 1.04 | .55 | .45 | 15125 | 24750 | 10125 | .5490 | .4510 | 15370 | 25250 | 10370 | 15125 | 25740 | 10125 | -990  | 19.21  |
| 50000 | 1.05 | .55 | .45 | 15125 | 24750 | 10125 | .5488 | .4512 | 15431 | 25375 | 10431 | 15125 | 25988 | 10125 | -1238 | 29.87  |
| 50000 | 1.06 | .55 | .45 | 15125 | 24750 | 10125 | .5486 | .4514 | 15493 | 25500 | 10493 | 15125 | 26235 | 10125 | -1485 | 42.81  |
| 50000 | 1.07 | .55 | .45 | 15125 | 24750 | 10125 | .5483 | .4517 | 15554 | 25625 | 10554 | 15125 | 26483 | 10125 | -1733 | 57.98  |
| 50000 | 1.08 | .55 | .45 | 15125 | 24750 | 10125 | .5481 | .4519 | 15615 | 25750 | 10615 | 15125 | 26730 | 10125 | -1980 | 75.37  |
| 50000 | 1.09 | .55 | .45 | 15125 | 24750 | 10125 | .5479 | .4521 | 15677 | 25874 | 10677 | 15125 | 26978 | 10125 | -2228 | 94.92  |
| 50000 | 1.10 | .55 | .45 | 15125 | 24750 | 10125 | .5476 | .4524 | 15738 | 25999 | 10738 | 15125 | 27225 | 10125 | -2475 | 116.63 |
| 50000 | 1.11 | .55 | .45 | 15125 | 24750 | 10125 | .5474 | .4526 | 15799 | 26124 | 10799 | 15125 | 27473 | 10125 | -2723 | 140.45 |
| 50000 | 1.12 | .55 | .45 | 15125 | 24750 | 10125 | .5472 | .4528 | 15860 | 26249 | 10860 | 15125 | 27720 | 10125 | -2970 | 166.35 |
| 50000 | 1.13 | .55 | .45 | 15125 | 24750 | 10125 | .5470 | .4530 | 15922 | 26374 | 10922 | 15125 | 27968 | 10125 | -3218 | 194.31 |
| 50000 | 1.14 | .55 | .45 | 15125 | 24750 | 10125 | .5468 | .4532 | 15983 | 26499 | 10983 | 15125 | 28215 | 10125 | -3465 | 224.29 |
| 50000 | 1.15 | .55 | .45 | 15125 | 24750 | 10125 | .5465 | .4535 | 16044 | 26624 | 11044 | 15125 | 28463 | 10125 | -3713 | 256.27 |
| 50000 | 1.16 | .55 | .45 | 15125 | 24750 | 10125 | .5463 | .4537 | 16106 | 26748 | 11106 | 15125 | 28710 | 10125 | -3960 | 290.22 |
| 50000 | 1.17 | .55 | .45 | 15125 | 24750 | 10125 | .5461 | .4539 | 16167 | 26873 | 11167 | 15125 | 28958 | 10125 | -4208 | 326.11 |
| 50000 | 1.18 | .55 | .45 | 15125 | 24750 | 10125 | .5459 | .4541 | 16229 | 26998 | 11229 | 15125 | 29205 | 10125 | -4455 | 363.91 |
| 50000 | 1.19 | .55 | .45 | 15125 | 24750 | 10125 | .5457 | .4543 | 16290 | 27123 | 11290 | 15125 | 29453 | 10125 | -4703 | 403.61 |
| 50000 | 1.20 | .55 | .45 | 15125 | 24750 | 10125 | .5455 | .4545 | 16351 | 27248 | 11351 | 15125 | 29700 | 10125 | -4950 | 445.1  |

|       |      |     |     |       |       |      |       |       |       |       |      |       |       |      |      |        |
|-------|------|-----|-----|-------|-------|------|-------|-------|-------|-------|------|-------|-------|------|------|--------|
|       |      |     |     |       |       |      |       |       |       |       |      |       |       |      |      | 7      |
| 50000 | .80  | .60 | .40 | 18000 | 24000 | 8000 | .6106 | .3894 | 16853 | 21494 | 6853 | 18000 | 19200 | 8000 | 4800 | 514.78 |
| 50000 | .81  | .60 | .40 | 18000 | 24000 | 8000 | .6100 | .3900 | 16910 | 21620 | 6910 | 18000 | 19440 | 8000 | 4560 | 461.86 |
| 50000 | .82  | .60 | .40 | 18000 | 24000 | 8000 | .6095 | .3905 | 16967 | 21745 | 6967 | 18000 | 19680 | 8000 | 4320 | 412.11 |
| 50000 | .83  | .60 | .40 | 18000 | 24000 | 8000 | .6089 | .3911 | 17024 | 21871 | 7024 | 18000 | 19920 | 8000 | 4080 | 365.46 |
| 50000 | .84  | .60 | .40 | 18000 | 24000 | 8000 | .6083 | .3917 | 17082 | 21997 | 7082 | 18000 | 20160 | 8000 | 3840 | 321.87 |
| 50000 | .85  | .60 | .40 | 18000 | 24000 | 8000 | .6078 | .3922 | 17139 | 22122 | 7139 | 18000 | 20400 | 8000 | 3600 | 281.27 |
| 50000 | .86  | .60 | .40 | 18000 | 24000 | 8000 | .6072 | .3928 | 17196 | 22248 | 7196 | 18000 | 20640 | 8000 | 3360 | 243.63 |
| 50000 | .87  | .60 | .40 | 18000 | 24000 | 8000 | .6067 | .3933 | 17253 | 22373 | 7253 | 18000 | 20880 | 8000 | 3120 | 208.88 |
| 50000 | .88  | .60 | .40 | 18000 | 24000 | 8000 | .6061 | .3939 | 17311 | 22499 | 7311 | 18000 | 21120 | 8000 | 2880 | 176.98 |
| 50000 | .89  | .60 | .40 | 18000 | 24000 | 8000 | .6056 | .3944 | 17368 | 22624 | 7368 | 18000 | 21360 | 8000 | 2640 | 147.89 |
| 50000 | .90  | .60 | .40 | 18000 | 24000 | 8000 | .6050 | .3950 | 17425 | 22750 | 7425 | 18000 | 21600 | 8000 | 2400 | 121.55 |
| 50000 | .91  | .60 | .40 | 18000 | 24000 | 8000 | .6045 | .3955 | 17483 | 22875 | 7483 | 18000 | 21840 | 8000 | 2160 | 97.91  |
| 50000 | .92  | .60 | .40 | 18000 | 24000 | 8000 | .6040 | .3960 | 17540 | 23000 | 7540 | 18000 | 22080 | 8000 | 1920 | 76.94  |
| 50000 | .93  | .60 | .40 | 18000 | 24000 | 8000 | .6035 | .3965 | 17597 | 23125 | 7597 | 18000 | 22320 | 8000 | 1680 | 58.59  |
| 50000 | .94  | .60 | .40 | 18000 | 24000 | 8000 | .6030 | .3970 | 17655 | 23250 | 7655 | 18000 | 22560 | 8000 | 1440 | 42.81  |
| 50000 | .95  | .60 | .40 | 18000 | 24000 | 8000 | .6025 | .3975 | 17712 | 23375 | 7712 | 18000 | 22800 | 8000 | 1200 | 29.57  |
| 50000 | .96  | .60 | .40 | 18000 | 24000 | 8000 | .6020 | .3980 | 17770 | 23500 | 7770 | 18000 | 23040 | 8000 | 960  | 18.82  |
| 50000 | .97  | .60 | .40 | 18000 | 24000 | 8000 | .6015 | .3985 | 17827 | 23625 | 7827 | 18000 | 23280 | 8000 | 720  | 10.53  |
| 50000 | .98  | .60 | .40 | 18000 | 24000 | 8000 | .6010 | .3990 | 17885 | 23750 | 7885 | 18000 | 23520 | 8000 | 480  | 4.66   |
| 50000 | .99  | .60 | .40 | 18000 | 24000 | 8000 | .6005 | .3995 | 17942 | 23875 | 7942 | 18000 | 23760 | 8000 | 240  | 1.16   |
| 50000 | 1.00 | .60 | .40 | 18000 | 24000 | 8000 | .6000 | .4000 | 18000 | 24000 | 8000 | 18000 | 24000 | 8000 | 0    | .00    |
| 50000 | 1.01 | .60 | .40 | 18000 | 24000 | 8000 | .5995 | .4005 | 18058 | 24125 | 8058 | 18000 | 24240 | 8000 | -240 | 1.15   |

|       |      |     |     |       |       |      |       |       |       |       |      |       |       |      |       |        |
|-------|------|-----|-----|-------|-------|------|-------|-------|-------|-------|------|-------|-------|------|-------|--------|
| 50000 | 1.02 | .60 | .40 | 18000 | 24000 | 8000 | .5990 | .4010 | 18115 | 24250 | 8115 | 18000 | 24480 | 8000 | -480  | 4.56   |
| 50000 | 1.03 | .60 | .40 | 18000 | 24000 | 8000 | .5986 | .4014 | 18173 | 24374 | 8173 | 18000 | 24720 | 8000 | -720  | 10.21  |
| 50000 | 1.04 | .60 | .40 | 18000 | 24000 | 8000 | .5981 | .4019 | 18231 | 24499 | 8231 | 18000 | 24960 | 8000 | -960  | 18.06  |
| 50000 | 1.05 | .60 | .40 | 18000 | 24000 | 8000 | .5977 | .4023 | 18288 | 24623 | 8288 | 18000 | 25200 | 8000 | -1200 | 28.07  |
| 50000 | 1.06 | .60 | .40 | 18000 | 24000 | 8000 | .5972 | .4028 | 18346 | 24748 | 8346 | 18000 | 25440 | 8000 | -1440 | 40.22  |
| 50000 | 1.07 | .60 | .40 | 18000 | 24000 | 8000 | .5967 | .4033 | 18404 | 24873 | 8404 | 18000 | 25680 | 8000 | -1680 | 54.47  |
| 50000 | 1.08 | .60 | .40 | 18000 | 24000 | 8000 | .5963 | .4037 | 18462 | 24997 | 8462 | 18000 | 25920 | 8000 | -1920 | 70.79  |
| 50000 | 1.09 | .60 | .40 | 18000 | 24000 | 8000 | .5959 | .4041 | 18519 | 25121 | 8519 | 18000 | 26160 | 8000 | -2160 | 89.15  |
| 50000 | 1.10 | .60 | .40 | 18000 | 24000 | 8000 | .5954 | .4046 | 18577 | 25246 | 8577 | 18000 | 26400 | 8000 | -2400 | 109.53 |
| 50000 | 1.11 | .60 | .40 | 18000 | 24000 | 8000 | .5950 | .4050 | 18635 | 25370 | 8635 | 18000 | 26640 | 8000 | -2640 | 131.88 |
| 50000 | 1.12 | .60 | .40 | 18000 | 24000 | 8000 | .5946 | .4054 | 18693 | 25494 | 8693 | 18000 | 26880 | 8000 | -2880 | 156.18 |
| 50000 | 1.13 | .60 | .40 | 18000 | 24000 | 8000 | .5941 | .4059 | 18751 | 25619 | 8751 | 18000 | 27120 | 8000 | -3120 | 182.41 |
| 50000 | 1.14 | .60 | .40 | 18000 | 24000 | 8000 | .5937 | .4063 | 18809 | 25743 | 8809 | 18000 | 27360 | 8000 | -3360 | 210.54 |
| 50000 | 1.15 | .60 | .40 | 18000 | 24000 | 8000 | .5933 | .4067 | 18866 | 25867 | 8866 | 18000 | 27600 | 8000 | -3600 | 240.54 |
| 50000 | 1.16 | .60 | .40 | 18000 | 24000 | 8000 | .5929 | .4071 | 18924 | 25991 | 8924 | 18000 | 27840 | 8000 | -3840 | 272.38 |
| 50000 | 1.17 | .60 | .40 | 18000 | 24000 | 8000 | .5925 | .4075 | 18982 | 26115 | 8982 | 18000 | 28080 | 8000 | -4080 | 306.03 |
| 50000 | 1.18 | .60 | .40 | 18000 | 24000 | 8000 | .5920 | .4080 | 19040 | 26240 | 9040 | 18000 | 28320 | 8000 | -4320 | 341.48 |
| 50000 | 1.19 | .60 | .40 | 18000 | 24000 | 8000 | .5916 | .4084 | 19098 | 26364 | 9098 | 18000 | 28560 | 8000 | -4560 | 378.70 |
| 50000 | 1.20 | .60 | .40 | 18000 | 24000 | 8000 | .5912 | .4088 | 19156 | 26488 | 9156 | 18000 | 28800 | 8000 | -4800 | 417.66 |
| 50000 | .80  | .65 | .35 | 21125 | 22750 | 6125 | .6650 | .3350 | 20100 | 20250 | 5100 | 21125 | 18200 | 6125 | 4550  | 465.69 |
| 50000 | .81  | .65 | .35 | 21125 | 22750 | 6125 | .6642 | .3358 | 20151 | 20376 | 5151 | 21125 | 18428 | 6125 | 4323  | 417.64 |

|       |      |     |     |       |       |      |       |       |       |       |      |       |       |      |       |        |
|-------|------|-----|-----|-------|-------|------|-------|-------|-------|-------|------|-------|-------|------|-------|--------|
| 50000 | .82  | .65 | .35 | 21125 | 22750 | 6125 | .6634 | .3366 | 20202 | 20502 | 5202 | 21125 | 18655 | 6125 | 4095  | 372.49 |
| 50000 | .83  | .65 | .35 | 21125 | 22750 | 6125 | .6626 | .3374 | 20252 | 20628 | 5252 | 21125 | 18883 | 6125 | 3868  | 330.19 |
| 50000 | .84  | .65 | .35 | 21125 | 22750 | 6125 | .6618 | .3382 | 20303 | 20753 | 5303 | 21125 | 19110 | 6125 | 3640  | 290.68 |
| 50000 | .85  | .65 | .35 | 21125 | 22750 | 6125 | .6610 | .3390 | 20354 | 20879 | 5354 | 21125 | 19338 | 6125 | 3413  | 253.92 |
| 50000 | .86  | .65 | .35 | 21125 | 22750 | 6125 | .6602 | .3398 | 20405 | 21004 | 5405 | 21125 | 19565 | 6125 | 3185  | 219.86 |
| 50000 | .87  | .65 | .35 | 21125 | 22750 | 6125 | .6594 | .3406 | 20456 | 21130 | 5456 | 21125 | 19793 | 6125 | 2958  | 188.43 |
| 50000 | .88  | .65 | .35 | 21125 | 22750 | 6125 | .6587 | .3413 | 20507 | 21255 | 5507 | 21125 | 20020 | 6125 | 2730  | 159.60 |
| 50000 | .89  | .65 | .35 | 21125 | 22750 | 6125 | .6579 | .3421 | 20559 | 21380 | 5559 | 21125 | 20248 | 6125 | 2503  | 133.32 |
| 50000 | .90  | .65 | .35 | 21125 | 22750 | 6125 | .6572 | .3428 | 20610 | 21505 | 5610 | 21125 | 20475 | 6125 | 2275  | 109.53 |
| 50000 | .91  | .65 | .35 | 21125 | 22750 | 6125 | .6564 | .3436 | 20661 | 21630 | 5661 | 21125 | 20703 | 6125 | 2048  | 88.20  |
| 50000 | .92  | .65 | .35 | 21125 | 22750 | 6125 | .6557 | .3443 | 20712 | 21755 | 5712 | 21125 | 20930 | 6125 | 1820  | 69.29  |
| 50000 | .93  | .65 | .35 | 21125 | 22750 | 6125 | .6549 | .3451 | 20764 | 21880 | 5764 | 21125 | 21158 | 6125 | 1593  | 52.74  |
| 50000 | .94  | .65 | .35 | 21125 | 22750 | 6125 | .6542 | .3458 | 20815 | 22004 | 5815 | 21125 | 21385 | 6125 | 1365  | 38.53  |
| 50000 | .95  | .65 | .35 | 21125 | 22750 | 6125 | .6535 | .3465 | 20867 | 22129 | 5867 | 21125 | 21613 | 6125 | 1138  | 26.61  |
| 50000 | .96  | .65 | .35 | 21125 | 22750 | 6125 | .6528 | .3472 | 20918 | 22253 | 5918 | 21125 | 21840 | 6125 | 910   | 16.93  |
| 50000 | .97  | .65 | .35 | 21125 | 22750 | 6125 | .6521 | .3479 | 20970 | 22378 | 5970 | 21125 | 22068 | 6125 | 683   | 9.47   |
| 50000 | .98  | .65 | .35 | 21125 | 22750 | 6125 | .6514 | .3486 | 21022 | 22502 | 6022 | 21125 | 22295 | 6125 | 455   | 4.19   |
| 50000 | .99  | .65 | .35 | 21125 | 22750 | 6125 | .6507 | .3493 | 21073 | 22626 | 6073 | 21125 | 22523 | 6125 | 228   | 1.04   |
| 50000 | 1.00 | .65 | .35 | 21125 | 22750 | 6125 | .6500 | .3500 | 21125 | 22750 | 6125 | 21125 | 22750 | 6125 | 0     | .00    |
| 50000 | 1.01 | .65 | .35 | 21125 | 22750 | 6125 | .6493 | .3507 | 21177 | 22874 | 6177 | 21125 | 22978 | 6125 | -228  | 1.03   |
| 50000 | 1.02 | .65 | .35 | 21125 | 22750 | 6125 | .6486 | .3514 | 21229 | 22998 | 6229 | 21125 | 23205 | 6125 | -455  | 4.10   |
| 50000 | 1.03 | .65 | .35 | 21125 | 22750 | 6125 | .6480 | .3520 | 21280 | 23122 | 6280 | 21125 | 23433 | 6125 | -683  | 9.17   |
| 50000 | 1.04 | .65 | .35 | 21125 | 22750 | 6125 | .6473 | .3527 | 21332 | 23245 | 6332 | 21125 | 23660 | 6125 | -910  | 16.21  |
| 50000 | 1.05 | .65 | .35 | 21125 | 22750 | 6125 | .6467 | .3533 | 21384 | 23369 | 6384 | 21125 | 23888 | 6125 | -1138 | 25.19  |

|       |      |     |     |       |       |      |       |       |       |       |      |       |       |      |       |            |
|-------|------|-----|-----|-------|-------|------|-------|-------|-------|-------|------|-------|-------|------|-------|------------|
| 50000 | 1.06 | .65 | .35 | 21125 | 22750 | 6125 | .6460 | .3540 | 21436 | 23492 | 6436 | 21125 | 24115 | 6125 | -1365 | 36.09      |
| 50000 | 1.07 | .65 | .35 | 21125 | 22750 | 6125 | .6454 | .3546 | 21488 | 23616 | 6488 | 21125 | 24343 | 6125 | -1593 | 48.87      |
| 50000 | 1.08 | .65 | .35 | 21125 | 22750 | 6125 | .6447 | .3553 | 21540 | 23739 | 6540 | 21125 | 24570 | 6125 | -1820 | 63.50      |
| 50000 | 1.09 | .65 | .35 | 21125 | 22750 | 6125 | .6441 | .3559 | 21593 | 23862 | 6593 | 21125 | 24798 | 6125 | -2048 | 79.95      |
| 50000 | 1.10 | .65 | .35 | 21125 | 22750 | 6125 | .6435 | .3565 | 21645 | 23985 | 6645 | 21125 | 25025 | 6125 | -2275 | 98.20      |
| 50000 | 1.11 | .65 | .35 | 21125 | 22750 | 6125 | .6429 | .3571 | 21697 | 24108 | 6697 | 21125 | 25253 | 6125 | -2503 | 118.2<br>2 |
| 50000 | 1.12 | .65 | .35 | 21125 | 22750 | 6125 | .6422 | .3578 | 21749 | 24231 | 6749 | 21125 | 25480 | 6125 | -2730 | 139.9<br>9 |
| 50000 | 1.13 | .65 | .35 | 21125 | 22750 | 6125 | .6416 | .3584 | 21802 | 24354 | 6802 | 21125 | 25708 | 6125 | -2958 | 163.4<br>7 |
| 50000 | 1.14 | .65 | .35 | 21125 | 22750 | 6125 | .6410 | .3590 | 21854 | 24477 | 6854 | 21125 | 25935 | 6125 | -3185 | 188.6<br>4 |
| 50000 | 1.15 | .65 | .35 | 21125 | 22750 | 6125 | .6404 | .3596 | 21906 | 24600 | 6906 | 21125 | 26163 | 6125 | -3413 | 215.4<br>8 |
| 50000 | 1.16 | .65 | .35 | 21125 | 22750 | 6125 | .6398 | .3602 | 21959 | 24723 | 6959 | 21125 | 26390 | 6125 | -3640 | 243.9<br>7 |
| 50000 | 1.17 | .65 | .35 | 21125 | 22750 | 6125 | .6392 | .3608 | 22011 | 24845 | 7011 | 21125 | 26618 | 6125 | -3868 | 274.0<br>7 |
| 50000 | 1.18 | .65 | .35 | 21125 | 22750 | 6125 | .6386 | .3614 | 22064 | 24968 | 7064 | 21125 | 26845 | 6125 | -4095 | 305.7<br>8 |
| 50000 | 1.19 | .65 | .35 | 21125 | 22750 | 6125 | .6381 | .3619 | 22116 | 25090 | 7116 | 21125 | 27073 | 6125 | -4323 | 339.0<br>5 |
| 50000 | 1.20 | .65 | .35 | 21125 | 22750 | 6125 | .6375 | .3625 | 22169 | 25213 | 7169 | 21125 | 27300 | 6125 | -4550 | 373.8<br>9 |
| 50000 | .80  | .70 | .30 | 24500 | 21000 | 4500 | .7183 | .2817 | 23633 | 18533 | 3633 | 24500 | 16800 | 4500 | 4200  | 400.5<br>5 |
| 50000 | .81  | .70 | .30 | 24500 | 21000 | 4500 | .7173 | .2827 | 23676 | 18658 | 3676 | 24500 | 17010 | 4500 | 3990  | 359.0<br>0 |
| 50000 | .82  | .70 | .30 | 24500 | 21000 | 4500 | .7164 | .2836 | 23719 | 18783 | 3719 | 24500 | 17220 | 4500 | 3780  | 320.0<br>0 |
| 50000 | .83  | .70 | .30 | 24500 | 21000 | 4500 | .7154 | .2846 | 23761 | 18907 | 3761 | 24500 | 17430 | 4500 | 3570  | 283.5<br>0 |
| 50000 | .84  | .70 | .30 | 24500 | 21000 | 4500 | .7144 | .2856 | 23804 | 19032 | 3804 | 24500 | 17640 | 4500 | 3360  | 249.4      |



|       |      |     |     |       |       |      |       |       |       |       |      |       |       |      |       |        |
|-------|------|-----|-----|-------|-------|------|-------|-------|-------|-------|------|-------|-------|------|-------|--------|
|       |      |     |     |       |       |      |       |       |       |       |      |       |       |      |       | 4      |
| 50000 | .85  | .70 | .30 | 24500 | 21000 | 4500 | .7134 | .2866 | 23847 | 19156 | 3847 | 24500 | 17850 | 4500 | 3150  | 217.78 |
| 50000 | .86  | .70 | .30 | 24500 | 21000 | 4500 | .7125 | .2875 | 23890 | 19280 | 3890 | 24500 | 18060 | 4500 | 2940  | 188.46 |
| 50000 | .87  | .70 | .30 | 24500 | 21000 | 4500 | .7116 | .2884 | 23933 | 19404 | 3933 | 24500 | 18270 | 4500 | 2730  | 161.44 |
| 50000 | .88  | .70 | .30 | 24500 | 21000 | 4500 | .7106 | .2894 | 23976 | 19528 | 3976 | 24500 | 18480 | 4500 | 2520  | 136.67 |
| 50000 | .89  | .70 | .30 | 24500 | 21000 | 4500 | .7097 | .2903 | 24019 | 19651 | 4019 | 24500 | 18690 | 4500 | 2310  | 114.11 |
| 50000 | .90  | .70 | .30 | 24500 | 21000 | 4500 | .7088 | .2912 | 24063 | 19775 | 4063 | 24500 | 18900 | 4500 | 2100  | 93.71  |
| 50000 | .91  | .70 | .30 | 24500 | 21000 | 4500 | .7079 | .2921 | 24106 | 19898 | 4106 | 24500 | 19110 | 4500 | 1890  | 75.43  |
| 50000 | .92  | .70 | .30 | 24500 | 21000 | 4500 | .7070 | .2930 | 24150 | 20021 | 4150 | 24500 | 19320 | 4500 | 1680  | 59.22  |
| 50000 | .93  | .70 | .30 | 24500 | 21000 | 4500 | .7061 | .2939 | 24193 | 20144 | 4193 | 24500 | 19530 | 4500 | 1470  | 45.06  |
| 50000 | .94  | .70 | .30 | 24500 | 21000 | 4500 | .7052 | .2948 | 24237 | 20267 | 4237 | 24500 | 19740 | 4500 | 1260  | 32.91  |
| 50000 | .95  | .70 | .30 | 24500 | 21000 | 4500 | .7043 | .2957 | 24280 | 20389 | 4280 | 24500 | 19950 | 4500 | 1050  | 22.71  |
| 50000 | .96  | .70 | .30 | 24500 | 21000 | 4500 | .7034 | .2966 | 24324 | 20512 | 4324 | 24500 | 20160 | 4500 | 840   | 14.45  |
| 50000 | .97  | .70 | .30 | 24500 | 21000 | 4500 | .7026 | .2974 | 24368 | 20634 | 4368 | 24500 | 20370 | 4500 | 630   | 8.08   |
| 50000 | .98  | .70 | .30 | 24500 | 21000 | 4500 | .7017 | .2983 | 24412 | 20756 | 4412 | 24500 | 20580 | 4500 | 420   | 3.57   |
| 50000 | .99  | .70 | .30 | 24500 | 21000 | 4500 | .7008 | .2992 | 24456 | 20878 | 4456 | 24500 | 20790 | 4500 | 210   | .89    |
| 50000 | 1.00 | .70 | .30 | 24500 | 21000 | 4500 | .7000 | .3000 | 24500 | 21000 | 4500 | 24500 | 21000 | 4500 | 0     | .00    |
| 50000 | 1.01 | .70 | .30 | 24500 | 21000 | 4500 | .6992 | .3008 | 24544 | 21122 | 4544 | 24500 | 21210 | 4500 | -210  | .88    |
| 50000 | 1.02 | .70 | .30 | 24500 | 21000 | 4500 | .6983 | .3017 | 24588 | 21243 | 4588 | 24500 | 21420 | 4500 | -420  | 3.49   |
| 50000 | 1.03 | .70 | .30 | 24500 | 21000 | 4500 | .6975 | .3025 | 24633 | 21365 | 4633 | 24500 | 21630 | 4500 | -630  | 7.80   |
| 50000 | 1.04 | .70 | .30 | 24500 | 21000 | 4500 | .6967 | .3033 | 24677 | 21486 | 4677 | 24500 | 21840 | 4500 | -840  | 13.79  |
| 50000 | 1.05 | .70 | .30 | 24500 | 21000 | 4500 | .6959 | .3041 | 24721 | 21607 | 4721 | 24500 | 22050 | 4500 | -1050 | 21.43  |
| 50000 | 1.06 | .70 | .30 | 24500 | 21000 | 4500 | .6951 | .3049 | 24766 | 21728 | 4766 | 24500 | 22260 | 4500 | -1260 | 30.69  |
| 50000 | 1.07 | .70 | .30 | 24500 | 21000 | 4500 | .6943 | .3057 | 24810 | 21849 | 4810 | 24500 | 22470 | 4500 | -1470 | 41.55  |
| 50000 | 1.08 | .70 | .30 | 24500 | 21000 | 4500 | .6935 | .3065 | 24855 | 21970 | 4855 | 24500 | 22680 | 4500 | -1680 | 53.97  |
| 50000 | 1.09 | .70 | .30 | 24500 | 21000 | 4500 | .6927 | .3073 | 24900 | 22091 | 4900 | 24500 | 22890 | 4500 | -1890 | 67.93  |
| 50000 | 1.10 | .70 | .30 | 24500 | 21000 | 4500 | .6919 | .3081 | 24944 | 22211 | 4944 | 24500 | 23100 | 4500 | -2100 | 83.42  |
| 50000 | 1.11 | .70 | .30 | 24500 | 21000 | 4500 | .6912 | .3088 | 24989 | 22332 | 4989 | 24500 | 23310 | 4500 | -2310 | 100.4  |

|       |      |     |     |       |       |      |       |       |       |       |      |       |       |      |       |        |
|-------|------|-----|-----|-------|-------|------|-------|-------|-------|-------|------|-------|-------|------|-------|--------|
|       |      |     |     |       |       |      |       |       |       |       |      |       |       |      |       | 0      |
| 50000 | 1.12 | .70 | .30 | 24500 | 21000 | 4500 | .6904 | .3096 | 25034 | 22452 | 5034 | 24500 | 23520 | 4500 | -2520 | 118.86 |
| 50000 | 1.13 | .70 | .30 | 24500 | 21000 | 4500 | .6896 | .3104 | 25079 | 22572 | 5079 | 24500 | 23730 | 4500 | -2730 | 138.76 |
| 50000 | 1.14 | .70 | .30 | 24500 | 21000 | 4500 | .6889 | .3111 | 25124 | 22692 | 5124 | 24500 | 23940 | 4500 | -2940 | 160.09 |
| 50000 | 1.15 | .70 | .30 | 24500 | 21000 | 4500 | .6881 | .3119 | 25169 | 22812 | 5169 | 24500 | 24150 | 4500 | -3150 | 182.83 |
| 50000 | 1.16 | .70 | .30 | 24500 | 21000 | 4500 | .6874 | .3126 | 25214 | 22932 | 5214 | 24500 | 24360 | 4500 | -3360 | 206.95 |
| 50000 | 1.17 | .70 | .30 | 24500 | 21000 | 4500 | .6867 | .3133 | 25259 | 23052 | 5259 | 24500 | 24570 | 4500 | -3570 | 232.44 |
| 50000 | 1.18 | .70 | .30 | 24500 | 21000 | 4500 | .6859 | .3141 | 25304 | 23171 | 5304 | 24500 | 24780 | 4500 | -3780 | 259.27 |
| 50000 | 1.19 | .70 | .30 | 24500 | 21000 | 4500 | .6852 | .3148 | 25350 | 23291 | 5350 | 24500 | 24990 | 4500 | -3990 | 287.43 |
| 50000 | 1.20 | .70 | .30 | 24500 | 21000 | 4500 | .6845 | .3155 | 25395 | 23410 | 5395 | 24500 | 25200 | 4500 | -4200 | 316.90 |
| 50000 | .80  | .75 | .25 | 28125 | 18750 | 3125 | .7703 | .2297 | 27441 | 16368 | 2441 | 28125 | 15000 | 3125 | 3750  | 323.17 |
| 50000 | .81  | .75 | .25 | 28125 | 18750 | 3125 | .7692 | .2308 | 27474 | 16489 | 2474 | 28125 | 15188 | 3125 | 3563  | 289.43 |
| 50000 | .82  | .75 | .25 | 28125 | 18750 | 3125 | .7681 | .2319 | 27507 | 16610 | 2507 | 28125 | 15375 | 3125 | 3375  | 257.79 |
| 50000 | .83  | .75 | .25 | 28125 | 18750 | 3125 | .7670 | .2330 | 27541 | 16731 | 2541 | 28125 | 15563 | 3125 | 3188  | 228.22 |
| 50000 | .84  | .75 | .25 | 28125 | 18750 | 3125 | .7660 | .2340 | 27574 | 16851 | 2574 | 28125 | 15750 | 3125 | 3000  | 200.66 |
| 50000 | .85  | .75 | .25 | 28125 | 18750 | 3125 | .7649 | .2351 | 27608 | 16971 | 2608 | 28125 | 15938 | 3125 | 2813  | 175.07 |
| 50000 | .86  | .75 | .25 | 28125 | 18750 | 3125 | .7639 | .2361 | 27642 | 17091 | 2642 | 28125 | 16125 | 3125 | 2625  | 151.40 |
| 50000 | .87  | .75 | .25 | 28125 | 18750 | 3125 | .7628 | .2372 | 27676 | 17211 | 2676 | 28125 | 16313 | 3125 | 2438  | 129.6  |

|       |      |     |     |       |       |      |       |       |       |       |      |       |       |      |       |        |
|-------|------|-----|-----|-------|-------|------|-------|-------|-------|-------|------|-------|-------|------|-------|--------|
|       |      |     |     |       |       |      |       |       |       |       |      |       |       |      |       | 1      |
| 50000 | .88  | .75 | .25 | 28125 | 18750 | 3125 | .7618 | .2382 | 27710 | 17330 | 2710 | 28125 | 16500 | 3125 | 2250  | 109.65 |
| 50000 | .89  | .75 | .25 | 28125 | 18750 | 3125 | .7608 | .2392 | 27744 | 17450 | 2744 | 28125 | 16688 | 3125 | 2063  | 91.49  |
| 50000 | .90  | .75 | .25 | 28125 | 18750 | 3125 | .7597 | .2403 | 27778 | 17569 | 2778 | 28125 | 16875 | 3125 | 1875  | 75.09  |
| 50000 | .91  | .75 | .25 | 28125 | 18750 | 3125 | .7587 | .2413 | 27812 | 17688 | 2812 | 28125 | 17063 | 3125 | 1688  | 60.41  |
| 50000 | .92  | .75 | .25 | 28125 | 18750 | 3125 | .7577 | .2423 | 27847 | 17807 | 2847 | 28125 | 17250 | 3125 | 1500  | 47.40  |
| 50000 | .93  | .75 | .25 | 28125 | 18750 | 3125 | .7567 | .2433 | 27881 | 17925 | 2881 | 28125 | 17438 | 3125 | 1313  | 36.05  |
| 50000 | .94  | .75 | .25 | 28125 | 18750 | 3125 | .7558 | .2442 | 27916 | 18044 | 2916 | 28125 | 17625 | 3125 | 1125  | 26.31  |
| 50000 | .95  | .75 | .25 | 28125 | 18750 | 3125 | .7548 | .2452 | 27950 | 18162 | 2950 | 28125 | 17813 | 3125 | 938   | 18.15  |
| 50000 | .96  | .75 | .25 | 28125 | 18750 | 3125 | .7538 | .2462 | 27985 | 18280 | 2985 | 28125 | 18000 | 3125 | 750   | 11.54  |
| 50000 | .97  | .75 | .25 | 28125 | 18750 | 3125 | .7528 | .2472 | 28020 | 18398 | 3020 | 28125 | 18188 | 3125 | 563   | 6.45   |
| 50000 | .98  | .75 | .25 | 28125 | 18750 | 3125 | .7519 | .2481 | 28055 | 18515 | 3055 | 28125 | 18375 | 3125 | 375   | 2.85   |
| 50000 | .99  | .75 | .25 | 28125 | 18750 | 3125 | .7509 | .2491 | 28090 | 18633 | 3090 | 28125 | 18563 | 3125 | 188   | .71    |
| 50000 | 1.00 | .75 | .25 | 28125 | 18750 | 3125 | .7500 | .2500 | 28125 | 18750 | 3125 | 28125 | 18750 | 3125 | 0     | .00    |
| 50000 | 1.01 | .75 | .25 | 28125 | 18750 | 3125 | .7491 | .2509 | 28160 | 18867 | 3160 | 28125 | 18938 | 3125 | -188  | .70    |
| 50000 | 1.02 | .75 | .25 | 28125 | 18750 | 3125 | .7481 | .2519 | 28195 | 18984 | 3195 | 28125 | 19125 | 3125 | -375  | 2.78   |
| 50000 | 1.03 | .75 | .25 | 28125 | 18750 | 3125 | .7472 | .2528 | 28231 | 19101 | 3231 | 28125 | 19313 | 3125 | -563  | 6.21   |
| 50000 | 1.04 | .75 | .25 | 28125 | 18750 | 3125 | .7463 | .2537 | 28266 | 19217 | 3266 | 28125 | 19500 | 3125 | -750  | 10.98  |
| 50000 | 1.05 | .75 | .25 | 28125 | 18750 | 3125 | .7454 | .2546 | 28302 | 19334 | 3302 | 28125 | 19688 | 3125 | -938  | 17.05  |
| 50000 | 1.06 | .75 | .25 | 28125 | 18750 | 3125 | .7445 | .2555 | 28337 | 19450 | 3337 | 28125 | 19875 | 3125 | -1125 | 24.41  |
| 50000 | 1.07 | .75 | .25 | 28125 | 18750 | 3125 | .7436 | .2564 | 28373 | 19566 | 3373 | 28125 | 20063 | 3125 | -1313 | 33.03  |
| 50000 | 1.08 | .75 | .25 | 28125 | 18750 | 3125 | .7427 | .2573 | 28409 | 19682 | 3409 | 28125 | 20250 | 3125 | -1500 | 42.88  |
| 50000 | 1.09 | .75 | .25 | 28125 | 18750 | 3125 | .7418 | .2582 | 28445 | 19798 | 3445 | 28125 | 20438 | 3125 | -1688 | 53.96  |
| 50000 | 1.10 | .75 | .25 | 28125 | 18750 | 3125 | .7410 | .2590 | 28481 | 19913 | 3481 | 28125 | 20625 | 3125 | -1875 | 66.24  |
| 50000 | 1.11 | .75 | .25 | 28125 | 18750 | 3125 | .7401 | .2599 | 28517 | 20029 | 3517 | 28125 | 20813 | 3125 | -2063 | 79.70  |
| 50000 | 1.12 | .75 | .25 | 28125 | 18750 | 3125 | .7392 | .2608 | 28553 | 20144 | 3553 | 28125 | 21000 | 3125 | -2250 | 94.32  |
| 50000 | 1.13 | .75 | .25 | 28125 | 18750 | 3125 | .7384 | .2616 | 28589 | 20259 | 3589 | 28125 | 21188 | 3125 | -2438 | 110.08 |
| 50000 | 1.14 | .75 | .25 | 28125 | 18750 | 3125 | .7375 | .2625 | 28625 | 20374 | 3625 | 28125 | 21375 | 3125 | -2625 | 126.96 |
| 50000 | 1.15 | .75 | .25 | 28125 | 18750 | 3125 | .7367 | .2633 | 28662 | 20489 | 3662 | 28125 | 21563 | 3125 | -2813 | 144.95 |

|       |      |     |     |       |       |      |       |       |       |       |      |       |       |      |       |        |
|-------|------|-----|-----|-------|-------|------|-------|-------|-------|-------|------|-------|-------|------|-------|--------|
| 50000 | 1.16 | .75 | .25 | 28125 | 18750 | 3125 | .7358 | .2642 | 28698 | 20604 | 3698 | 28125 | 21750 | 3125 | -3000 | 164.03 |
| 50000 | 1.17 | .75 | .25 | 28125 | 18750 | 3125 | .7350 | .2650 | 28735 | 20718 | 3735 | 28125 | 21938 | 3125 | -3188 | 184.18 |
| 50000 | 1.18 | .75 | .25 | 28125 | 18750 | 3125 | .7342 | .2658 | 28771 | 20833 | 3771 | 28125 | 22125 | 3125 | -3375 | 205.39 |
| 50000 | 1.19 | .75 | .25 | 28125 | 18750 | 3125 | .7334 | .2666 | 28808 | 20947 | 3808 | 28125 | 22313 | 3125 | -3563 | 227.63 |
| 50000 | 1.20 | .75 | .25 | 28125 | 18750 | 3125 | .7326 | .2674 | 28844 | 21061 | 3844 | 28125 | 22500 | 3125 | -3750 | 250.91 |
| 50000 | .80  | .80 | .20 | 32000 | 16000 | 2000 | .8205 | .1795 | 31508 | 13785 | 1508 | 32000 | 12800 | 2000 | 3200  | 238.78 |
| 50000 | .81  | .80 | .20 | 32000 | 16000 | 2000 | .8194 | .1806 | 31531 | 13897 | 1531 | 32000 | 12960 | 2000 | 3040  | 213.64 |
| 50000 | .82  | .80 | .20 | 32000 | 16000 | 2000 | .8183 | .1817 | 31555 | 14010 | 1555 | 32000 | 13120 | 2000 | 2880  | 190.12 |
| 50000 | .83  | .80 | .20 | 32000 | 16000 | 2000 | .8173 | .1827 | 31579 | 14122 | 1579 | 32000 | 13280 | 2000 | 2720  | 168.17 |
| 50000 | .84  | .80 | .20 | 32000 | 16000 | 2000 | .8162 | .1838 | 31603 | 14234 | 1603 | 32000 | 13440 | 2000 | 2560  | 147.73 |
| 50000 | .85  | .80 | .20 | 32000 | 16000 | 2000 | .8151 | .1849 | 31627 | 14346 | 1627 | 32000 | 13600 | 2000 | 2400  | 128.78 |
| 50000 | .86  | .80 | .20 | 32000 | 16000 | 2000 | .8141 | .1859 | 31651 | 14458 | 1651 | 32000 | 13760 | 2000 | 2240  | 111.28 |
| 50000 | .87  | .80 | .20 | 32000 | 16000 | 2000 | .8130 | .1870 | 31675 | 14569 | 1675 | 32000 | 13920 | 2000 | 2080  | 95.19  |
| 50000 | .88  | .80 | .20 | 32000 | 16000 | 2000 | .8120 | .1880 | 31700 | 14681 | 1700 | 32000 | 14080 | 2000 | 1920  | 80.47  |
| 50000 | .89  | .80 | .20 | 32000 | 16000 | 2000 | .8109 | .1891 | 31724 | 14792 | 1724 | 32000 | 14240 | 2000 | 1760  | 67.09  |
| 50000 | .90  | .80 | .20 | 32000 | 16000 | 2000 | .8099 | .1901 | 31749 | 14902 | 1749 | 32000 | 14400 | 2000 | 1600  | 55.03  |
| 50000 | .91  | .80 | .20 | 32000 | 16000 | 2000 | .8089 | .1911 | 31773 | 15013 | 1773 | 32000 | 14560 | 2000 | 1440  | 44.23  |
| 50000 | .92  | .80 | .20 | 32000 | 16000 | 2000 | .8079 | .1921 | 31798 | 15124 | 1798 | 32000 | 14720 | 2000 | 1280  | 34.69  |
| 50000 | .93  | .80 | .20 | 32000 | 16000 | 2000 | .8069 | .1931 | 31823 | 15234 | 1823 | 32000 | 14880 | 2000 | 1120  | 26.36  |
| 50000 | .94  | .80 | .20 | 32000 | 16000 | 2000 | .8059 | .1941 | 31848 | 15344 | 1848 | 32000 | 15040 | 2000 | 960   | 19.23  |
| 50000 | .95  | .80 | .20 | 32000 | 16000 | 2000 | .8049 | .1951 | 31873 | 15454 | 1873 | 32000 | 15200 | 2000 | 800   | 13.26  |
| 50000 | .96  | .80 | .20 | 32000 | 16000 | 2000 | .8039 | .1961 | 31898 | 15563 | 1898 | 32000 | 15360 | 2000 | 640   | 8.42   |

|       |      |     |     |       |       |      |       |       |       |       |      |       |       |      |       |        |
|-------|------|-----|-----|-------|-------|------|-------|-------|-------|-------|------|-------|-------|------|-------|--------|
| 50000 | .97  | .80 | .20 | 32000 | 16000 | 2000 | .8029 | .1971 | 31924 | 15673 | 1924 | 32000 | 15520 | 2000 | 480   | 4.70   |
| 50000 | .98  | .80 | .20 | 32000 | 16000 | 2000 | .8019 | .1981 | 31949 | 15782 | 1949 | 32000 | 15680 | 2000 | 320   | 2.08   |
| 50000 | .99  | .80 | .20 | 32000 | 16000 | 2000 | .8010 | .1990 | 31974 | 15891 | 1974 | 32000 | 15840 | 2000 | 160   | .52    |
| 50000 | 1.00 | .80 | .20 | 32000 | 16000 | 2000 | .8000 | .2000 | 32000 | 16000 | 2000 | 32000 | 16000 | 2000 | 0     | .00    |
| 50000 | 1.01 | .80 | .20 | 32000 | 16000 | 2000 | .7990 | .2010 | 32026 | 16109 | 2026 | 32000 | 16160 | 2000 | -160  | .51    |
| 50000 | 1.02 | .80 | .20 | 32000 | 16000 | 2000 | .7981 | .2019 | 32051 | 16217 | 2051 | 32000 | 16320 | 2000 | -320  | 2.02   |
| 50000 | 1.03 | .80 | .20 | 32000 | 16000 | 2000 | .7971 | .2029 | 32077 | 16326 | 2077 | 32000 | 16480 | 2000 | -480  | 4.52   |
| 50000 | 1.04 | .80 | .20 | 32000 | 16000 | 2000 | .7962 | .2038 | 32103 | 16434 | 2103 | 32000 | 16640 | 2000 | -640  | 7.98   |
| 50000 | 1.05 | .80 | .20 | 32000 | 16000 | 2000 | .7953 | .2047 | 32129 | 16542 | 2129 | 32000 | 16800 | 2000 | -800  | 12.38  |
| 50000 | 1.06 | .80 | .20 | 32000 | 16000 | 2000 | .7943 | .2057 | 32155 | 16650 | 2155 | 32000 | 16960 | 2000 | -960  | 17.72  |
| 50000 | 1.07 | .80 | .20 | 32000 | 16000 | 2000 | .7934 | .2066 | 32181 | 16757 | 2181 | 32000 | 17120 | 2000 | -1120 | 23.96  |
| 50000 | 1.08 | .80 | .20 | 32000 | 16000 | 2000 | .7925 | .2075 | 32208 | 16865 | 2208 | 32000 | 17280 | 2000 | -1280 | 31.10  |
| 50000 | 1.09 | .80 | .20 | 32000 | 16000 | 2000 | .7916 | .2084 | 32234 | 16972 | 2234 | 32000 | 17440 | 2000 | -1440 | 39.12  |
| 50000 | 1.10 | .80 | .20 | 32000 | 16000 | 2000 | .7907 | .2093 | 32260 | 17079 | 2260 | 32000 | 17600 | 2000 | -1600 | 48.00  |
| 50000 | 1.11 | .80 | .20 | 32000 | 16000 | 2000 | .7898 | .2102 | 32287 | 17186 | 2287 | 32000 | 17760 | 2000 | -1760 | 57.73  |
| 50000 | 1.12 | .80 | .20 | 32000 | 16000 | 2000 | .7889 | .2111 | 32314 | 17293 | 2314 | 32000 | 17920 | 2000 | -1920 | 68.29  |
| 50000 | 1.13 | .80 | .20 | 32000 | 16000 | 2000 | .7880 | .2120 | 32340 | 17399 | 2340 | 32000 | 18080 | 2000 | -2080 | 79.68  |
| 50000 | 1.14 | .80 | .20 | 32000 | 16000 | 2000 | .7871 | .2129 | 32367 | 17506 | 2367 | 32000 | 18240 | 2000 | -2240 | 91.86  |
| 50000 | 1.15 | .80 | .20 | 32000 | 16000 | 2000 | .7863 | .2137 | 32394 | 17612 | 2394 | 32000 | 18400 | 2000 | -2400 | 104.84 |
| 50000 | 1.16 | .80 | .20 | 32000 | 16000 | 2000 | .7854 | .2146 | 32421 | 17718 | 2421 | 32000 | 18560 | 2000 | -2560 | 118.59 |
| 50000 | 1.17 | .80 | .20 | 32000 | 16000 | 2000 | .7845 | .2155 | 32448 | 17824 | 2448 | 32000 | 18720 | 2000 | -2720 | 133.12 |
| 50000 | 1.18 | .80 | .20 | 32000 | 16000 | 2000 | .7837 | .2163 | 32475 | 17930 | 2475 | 32000 | 18880 | 2000 | -2880 | 148.39 |
| 50000 | 1.19 | .80 | .20 | 32000 | 16000 | 2000 | .7828 | .2172 | 32502 | 18036 | 2502 | 32000 | 19040 | 2000 | -3040 | 164.41 |
| 50000 | 1.20 | .80 | .20 | 32000 | 16000 | 2000 | .7820 | .2180 | 32529 | 18141 | 2529 | 32000 | 19200 | 2000 | -3200 | 181.16 |
| 50000 | .80  | .85 | .15 | 36125 | 12750 | 1125 | .8688 | .1312 | 35817 | 10817 | 817  | 36125 | 10200 | 1125 | 2550  | 154.23 |
| 50000 | .81  | .85 | .15 | 36125 | 12750 | 1125 | .8678 | .1322 | 35831 | 10915 | 831  | 36125 | 10328 | 1125 | 2423  | 137.8  |

|       |      |     |     |       |       |      |       |       |       |       |      |       |       |      |       |        |
|-------|------|-----|-----|-------|-------|------|-------|-------|-------|-------|------|-------|-------|------|-------|--------|
|       |      |     |     |       |       |      |       |       |       |       |      |       |       |      |       | 5      |
| 50000 | .82  | .85 | .15 | 36125 | 12750 | 1125 | .8668 | .1332 | 35846 | 11013 | 846  | 36125 | 10455 | 1125 | 2295  | 122.54 |
| 50000 | .83  | .85 | .15 | 36125 | 12750 | 1125 | .8659 | .1341 | 35861 | 11111 | 861  | 36125 | 10583 | 1125 | 2168  | 108.28 |
| 50000 | .84  | .85 | .15 | 36125 | 12750 | 1125 | .8649 | .1351 | 35876 | 11209 | 876  | 36125 | 10710 | 1125 | 2040  | 95.03  |
| 50000 | .85  | .85 | .15 | 36125 | 12750 | 1125 | .8639 | .1361 | 35890 | 11307 | 890  | 36125 | 10838 | 1125 | 1913  | 82.76  |
| 50000 | .86  | .85 | .15 | 36125 | 12750 | 1125 | .8630 | .1370 | 35906 | 11404 | 906  | 36125 | 10965 | 1125 | 1785  | 71.44  |
| 50000 | .87  | .85 | .15 | 36125 | 12750 | 1125 | .8620 | .1380 | 35921 | 11501 | 921  | 36125 | 11093 | 1125 | 1658  | 61.06  |
| 50000 | .88  | .85 | .15 | 36125 | 12750 | 1125 | .8610 | .1390 | 35936 | 11598 | 936  | 36125 | 11220 | 1125 | 1530  | 51.57  |
| 50000 | .89  | .85 | .15 | 36125 | 12750 | 1125 | .8601 | .1399 | 35951 | 11695 | 951  | 36125 | 11348 | 1125 | 1403  | 42.96  |
| 50000 | .90  | .85 | .15 | 36125 | 12750 | 1125 | .8592 | .1408 | 35967 | 11792 | 967  | 36125 | 11475 | 1125 | 1275  | 35.20  |
| 50000 | .91  | .85 | .15 | 36125 | 12750 | 1125 | .8582 | .1418 | 35982 | 11889 | 982  | 36125 | 11603 | 1125 | 1148  | 28.27  |
| 50000 | .92  | .85 | .15 | 36125 | 12750 | 1125 | .8573 | .1427 | 35998 | 11985 | 998  | 36125 | 11730 | 1125 | 1020  | 22.16  |
| 50000 | .93  | .85 | .15 | 36125 | 12750 | 1125 | .8564 | .1436 | 36013 | 12081 | 1013 | 36125 | 11858 | 1125 | 893   | 16.82  |
| 50000 | .94  | .85 | .15 | 36125 | 12750 | 1125 | .8554 | .1446 | 36029 | 12177 | 1029 | 36125 | 11985 | 1125 | 765   | 12.26  |
| 50000 | .95  | .85 | .15 | 36125 | 12750 | 1125 | .8545 | .1455 | 36045 | 12273 | 1045 | 36125 | 12113 | 1125 | 638   | 8.45   |
| 50000 | .96  | .85 | .15 | 36125 | 12750 | 1125 | .8536 | .1464 | 36061 | 12369 | 1061 | 36125 | 12240 | 1125 | 510   | 5.36   |
| 50000 | .97  | .85 | .15 | 36125 | 12750 | 1125 | .8527 | .1473 | 36077 | 12464 | 1077 | 36125 | 12368 | 1125 | 383   | 2.99   |
| 50000 | .98  | .85 | .15 | 36125 | 12750 | 1125 | .8518 | .1482 | 36093 | 12560 | 1093 | 36125 | 12495 | 1125 | 255   | 1.32   |
| 50000 | .99  | .85 | .15 | 36125 | 12750 | 1125 | .8509 | .1491 | 36109 | 12655 | 1109 | 36125 | 12623 | 1125 | 128   | .33    |
| 50000 | 1.00 | .85 | .15 | 36125 | 12750 | 1125 | .8500 | .1500 | 36125 | 12750 | 1125 | 36125 | 12750 | 1125 | 0     | .00    |
| 50000 | 1.01 | .85 | .15 | 36125 | 12750 | 1125 | .8491 | .1509 | 36141 | 12845 | 1141 | 36125 | 12878 | 1125 | -128  | .32    |
| 50000 | 1.02 | .85 | .15 | 36125 | 12750 | 1125 | .8482 | .1518 | 36158 | 12940 | 1158 | 36125 | 13005 | 1125 | -255  | 1.28   |
| 50000 | 1.03 | .85 | .15 | 36125 | 12750 | 1125 | .8473 | .1527 | 36174 | 13034 | 1174 | 36125 | 13133 | 1125 | -383  | 2.86   |
| 50000 | 1.04 | .85 | .15 | 36125 | 12750 | 1125 | .8465 | .1535 | 36191 | 13129 | 1191 | 36125 | 13260 | 1125 | -510  | 5.05   |
| 50000 | 1.05 | .85 | .15 | 36125 | 12750 | 1125 | .8456 | .1544 | 36207 | 13223 | 1207 | 36125 | 13388 | 1125 | -638  | 7.84   |
| 50000 | 1.06 | .85 | .15 | 36125 | 12750 | 1125 | .8447 | .1553 | 36224 | 13317 | 1224 | 36125 | 13515 | 1125 | -765  | 11.21  |
| 50000 | 1.07 | .85 | .15 | 36125 | 12750 | 1125 | .8439 | .1561 | 36241 | 13411 | 1241 | 36125 | 13643 | 1125 | -893  | 15.15  |
| 50000 | 1.08 | .85 | .15 | 36125 | 12750 | 1125 | .8430 | .1570 | 36258 | 13505 | 1258 | 36125 | 13770 | 1125 | -1020 | 19.66  |
| 50000 | 1.09 | .85 | .15 | 36125 | 12750 | 1125 | .8421 | .1579 | 36274 | 13599 | 1274 | 36125 | 13898 | 1125 | -1148 | 24.71  |
| 50000 | 1.10 | .85 | .15 | 36125 | 12750 | 1125 | .8413 | .1587 | 36291 | 13692 | 1291 | 36125 | 14025 | 1125 | -1275 | 30.31  |
| 50000 | 1.11 | .85 | .15 | 36125 | 12750 | 1125 | .8405 | .1595 | 36309 | 13785 | 1309 | 36125 | 14153 | 1125 | -1403 | 36.43  |

|       |      |     |     |       |       |      |       |       |       |       |      |       |       |      |       |        |
|-------|------|-----|-----|-------|-------|------|-------|-------|-------|-------|------|-------|-------|------|-------|--------|
| 50000 | 1.12 | .85 | .15 | 36125 | 12750 | 1125 | .8396 | .1604 | 36326 | 13879 | 1326 | 36125 | 14280 | 1125 | -1530 | 43.08  |
| 50000 | 1.13 | .85 | .15 | 36125 | 12750 | 1125 | .8388 | .1612 | 36343 | 13972 | 1343 | 36125 | 14408 | 1125 | -1658 | 50.23  |
| 50000 | 1.14 | .85 | .15 | 36125 | 12750 | 1125 | .8379 | .1621 | 36360 | 14065 | 1360 | 36125 | 14535 | 1125 | -1785 | 57.89  |
| 50000 | 1.15 | .85 | .15 | 36125 | 12750 | 1125 | .8371 | .1629 | 36377 | 14158 | 1377 | 36125 | 14663 | 1125 | -1913 | 66.04  |
| 50000 | 1.16 | .85 | .15 | 36125 | 12750 | 1125 | .8363 | .1637 | 36395 | 14250 | 1395 | 36125 | 14790 | 1125 | -2040 | 74.67  |
| 50000 | 1.17 | .85 | .15 | 36125 | 12750 | 1125 | .8355 | .1645 | 36412 | 14343 | 1412 | 36125 | 14918 | 1125 | -2168 | 83.78  |
| 50000 | 1.18 | .85 | .15 | 36125 | 12750 | 1125 | .8346 | .1654 | 36430 | 14435 | 1430 | 36125 | 15045 | 1125 | -2295 | 93.36  |
| 50000 | 1.19 | .85 | .15 | 36125 | 12750 | 1125 | .8338 | .1662 | 36448 | 14527 | 1448 | 36125 | 15173 | 1125 | -2423 | 103.39 |
| 50000 | 1.20 | .85 | .15 | 36125 | 12750 | 1125 | .8330 | .1670 | 36465 | 14619 | 1465 | 36125 | 15300 | 1125 | -2550 | 113.88 |
| 50000 | .80  | .90 | .10 | 40500 | 9000  | 500  | .9149 | .0851 | 40349 | 7502  | 349  | 40500 | 7200  | 500  | 1800  | 78.35  |
| 50000 | .81  | .90 | .10 | 40500 | 9000  | 500  | .9142 | .0858 | 40356 | 7578  | 356  | 40500 | 7290  | 500  | 1710  | 69.95  |
| 50000 | .82  | .90 | .10 | 40500 | 9000  | 500  | .9134 | .0866 | 40363 | 7654  | 363  | 40500 | 7380  | 500  | 1620  | 62.11  |
| 50000 | .83  | .90 | .10 | 40500 | 9000  | 500  | .9126 | .0874 | 40370 | 7730  | 370  | 40500 | 7470  | 500  | 1530  | 54.81  |
| 50000 | .84  | .90 | .10 | 40500 | 9000  | 500  | .9119 | .0881 | 40377 | 7806  | 377  | 40500 | 7560  | 500  | 1440  | 48.05  |
| 50000 | .85  | .90 | .10 | 40500 | 9000  | 500  | .9111 | .0889 | 40384 | 7881  | 384  | 40500 | 7650  | 500  | 1350  | 41.80  |
| 50000 | .86  | .90 | .10 | 40500 | 9000  | 500  | .9103 | .0897 | 40392 | 7956  | 392  | 40500 | 7740  | 500  | 1260  | 36.05  |
| 50000 | .87  | .90 | .10 | 40500 | 9000  | 500  | .9096 | .0904 | 40399 | 8032  | 399  | 40500 | 7830  | 500  | 1170  | 30.77  |
| 50000 | .88  | .90 | .10 | 40500 | 9000  | 500  | .9088 | .0912 | 40407 | 8107  | 407  | 40500 | 7920  | 500  | 1080  | 25.97  |
| 50000 | .89  | .90 | .10 | 40500 | 9000  | 500  | .9081 | .0919 | 40414 | 8182  | 414  | 40500 | 8010  | 500  | 990   | 21.61  |
| 50000 | .90  | .90 | .10 | 40500 | 9000  | 500  | .9073 | .0927 | 40422 | 8257  | 422  | 40500 | 8100  | 500  | 900   | 17.69  |
| 50000 | .91  | .90 | .10 | 40500 | 9000  | 500  | .9066 | .0934 | 40429 | 8332  | 429  | 40500 | 8190  | 500  | 810   | 14.19  |
| 50000 | .92  | .90 | .10 | 40500 | 9000  | 500  | .9058 | .0942 | 40437 | 8406  | 437  | 40500 | 8280  | 500  | 720   | 11.11  |
| 50000 | .93  | .90 | .10 | 40500 | 9000  | 500  | .9051 | .0949 | 40445 | 8481  | 445  | 40500 | 8370  | 500  | 630   | 8.43   |
| 50000 | .94  | .90 | .10 | 40500 | 9000  | 500  | .9044 | .0956 | 40452 | 8555  | 452  | 40500 | 8460  | 500  | 540   | 6.14   |
| 50000 | .95  | .90 | .10 | 40500 | 9000  | 500  | .9036 | .0964 | 40460 | 8630  | 460  | 40500 | 8550  | 500  | 450   | 4.23   |
| 50000 | .96  | .90 | .10 | 40500 | 9000  | 500  | .9029 | .0971 | 40468 | 8704  | 468  | 40500 | 8640  | 500  | 360   | 2.68   |
| 50000 | .97  | .90 | .10 | 40500 | 9000  | 500  | .9022 | .0978 | 40476 | 8778  | 476  | 40500 | 8730  | 500  | 270   | 1.50   |
| 50000 | .98  | .90 | .10 | 40500 | 9000  | 500  | .9014 | .0986 | 40484 | 8852  | 484  | 40500 | 8820  | 500  | 180   | .66    |
| 50000 | .99  | .90 | .10 | 40500 | 9000  | 500  | .9007 | .0993 | 40492 | 8926  | 492  | 40500 | 8910  | 500  | 90    | .16    |
| 50000 | 1.00 | .90 | .10 | 40500 | 9000  | 500  | .9000 | .1000 | 40500 | 9000  | 500  | 40500 | 9000  | 500  | 0     | .00    |
| 50000 | 1.01 | .90 | .10 | 40500 | 9000  | 500  | .8993 | .1007 | 40508 | 9074  | 508  | 40500 | 9090  | 500  | -90   | .16    |

|       |      |     |     |       |      |     |       |       |       |       |     |       |       |     |       |       |
|-------|------|-----|-----|-------|------|-----|-------|-------|-------|-------|-----|-------|-------|-----|-------|-------|
| 50000 | 1.02 | .90 | .10 | 40500 | 9000 | 500 | .8986 | .1014 | 40516 | 9147  | 516 | 40500 | 9180  | 500 | -180  | .64   |
| 50000 | 1.03 | .90 | .10 | 40500 | 9000 | 500 | .8979 | .1021 | 40525 | 9221  | 525 | 40500 | 9270  | 500 | -270  | 1.42  |
| 50000 | 1.04 | .90 | .10 | 40500 | 9000 | 500 | .8971 | .1029 | 40533 | 9294  | 533 | 40500 | 9360  | 500 | -360  | 2.51  |
| 50000 | 1.05 | .90 | .10 | 40500 | 9000 | 500 | .8964 | .1036 | 40541 | 9368  | 541 | 40500 | 9450  | 500 | -450  | 3.89  |
| 50000 | 1.06 | .90 | .10 | 40500 | 9000 | 500 | .8957 | .1043 | 40550 | 9441  | 550 | 40500 | 9540  | 500 | -540  | 5.56  |
| 50000 | 1.07 | .90 | .10 | 40500 | 9000 | 500 | .8950 | .1050 | 40558 | 9514  | 558 | 40500 | 9630  | 500 | -630  | 7.51  |
| 50000 | 1.08 | .90 | .10 | 40500 | 9000 | 500 | .8943 | .1057 | 40566 | 9587  | 566 | 40500 | 9720  | 500 | -720  | 9.74  |
| 50000 | 1.09 | .90 | .10 | 40500 | 9000 | 500 | .8936 | .1064 | 40575 | 9660  | 575 | 40500 | 9810  | 500 | -810  | 12.24 |
| 50000 | 1.10 | .90 | .10 | 40500 | 9000 | 500 | .8929 | .1071 | 40584 | 9733  | 584 | 40500 | 9900  | 500 | -900  | 15.00 |
| 50000 | 1.11 | .90 | .10 | 40500 | 9000 | 500 | .8922 | .1078 | 40592 | 9806  | 592 | 40500 | 9990  | 500 | -990  | 18.02 |
| 50000 | 1.12 | .90 | .10 | 40500 | 9000 | 500 | .8915 | .1085 | 40601 | 9878  | 601 | 40500 | 10080 | 500 | -1080 | 21.30 |
| 50000 | 1.13 | .90 | .10 | 40500 | 9000 | 500 | .8909 | .1091 | 40610 | 9951  | 610 | 40500 | 10170 | 500 | -1170 | 24.82 |
| 50000 | 1.14 | .90 | .10 | 40500 | 9000 | 500 | .8902 | .1098 | 40618 | 10023 | 618 | 40500 | 10260 | 500 | -1260 | 28.59 |
| 50000 | 1.15 | .90 | .10 | 40500 | 9000 | 500 | .8895 | .1105 | 40627 | 10096 | 627 | 40500 | 10350 | 500 | -1350 | 32.60 |
| 50000 | 1.16 | .90 | .10 | 40500 | 9000 | 500 | .8888 | .1112 | 40636 | 10168 | 636 | 40500 | 10440 | 500 | -1440 | 36.84 |
| 50000 | 1.17 | .90 | .10 | 40500 | 9000 | 500 | .8881 | .1119 | 40645 | 10240 | 645 | 40500 | 10530 | 500 | -1530 | 41.31 |
| 50000 | 1.18 | .90 | .10 | 40500 | 9000 | 500 | .8874 | .1126 | 40654 | 10312 | 654 | 40500 | 10620 | 500 | -1620 | 46.01 |
| 50000 | 1.19 | .90 | .10 | 40500 | 9000 | 500 | .8868 | .1132 | 40663 | 10384 | 663 | 40500 | 10710 | 500 | -1710 | 50.93 |
| 50000 | 1.20 | .90 | .10 | 40500 | 9000 | 500 | .8861 | .1139 | 40672 | 10456 | 672 | 40500 | 10800 | 500 | -1800 | 56.07 |
| 50000 | .80  | .95 | .05 | 45125 | 4750 | 125 | .9587 | .0413 | 45084 | 3883  | 84  | 45125 | 3800  | 125 | 950   | 22.30 |
| 50000 | .81  | .95 | .05 | 45125 | 4750 | 125 | .9583 | .0417 | 45085 | 3927  | 85  | 45125 | 3848  | 125 | 903   | 19.88 |
| 50000 | .82  | .95 | .05 | 45125 | 4750 | 125 | .9578 | .0422 | 45087 | 3970  | 87  | 45125 | 3895  | 125 | 855   | 17.63 |
| 50000 | .83  | .95 | .05 | 45125 | 4750 | 125 | .9574 | .0426 | 45089 | 4014  | 89  | 45125 | 3943  | 125 | 808   | 15.54 |
| 50000 | .84  | .95 | .05 | 45125 | 4750 | 125 | .9569 | .0431 | 45091 | 4057  | 91  | 45125 | 3990  | 125 | 760   | 13.61 |
| 50000 | .85  | .95 | .05 | 45125 | 4750 | 125 | .9565 | .0435 | 45093 | 4101  | 93  | 45125 | 4038  | 125 | 713   | 11.82 |
| 50000 | .86  | .95 | .05 | 45125 | 4750 | 125 | .9561 | .0439 | 45095 | 4145  | 95  | 45125 | 4085  | 125 | 665   | 10.18 |
| 50000 | .87  | .95 | .05 | 45125 | 4750 | 125 | .9556 | .0444 | 45097 | 4188  | 97  | 45125 | 4133  | 125 | 618   | 8.68  |
| 50000 | .88  | .95 | .05 | 45125 | 4750 | 125 | .9552 | .0448 | 45099 | 4231  | 99  | 45125 | 4180  | 125 | 570   | 7.32  |
| 50000 | .89  | .95 | .05 | 45125 | 4750 | 125 | .9548 | .0452 | 45101 | 4275  | 101 | 45125 | 4228  | 125 | 523   | 6.08  |
| 50000 | .90  | .95 | .05 | 45125 | 4750 | 125 | .9543 | .0457 | 45103 | 4318  | 103 | 45125 | 4275  | 125 | 475   | 4.97  |
| 50000 | .91  | .95 | .05 | 45125 | 4750 | 125 | .9539 | .0461 | 45105 | 4362  | 105 | 45125 | 4323  | 125 | 428   | 3.99  |
| 50000 | .92  | .95 | .05 | 45125 | 4750 | 125 | .9534 | .0466 | 45108 | 4405  | 108 | 45125 | 4370  | 125 | 380   | 3.12  |
| 50000 | .93  | .95 | .05 | 45125 | 4750 | 125 | .9530 | .0470 | 45110 | 4448  | 110 | 45125 | 4418  | 125 | 333   | 2.36  |



|       |      |      |     |       |      |     |            |       |       |      |     |       |      |     |      |       |
|-------|------|------|-----|-------|------|-----|------------|-------|-------|------|-----|-------|------|-----|------|-------|
| 50000 | .94  | .95  | .05 | 45125 | 4750 | 125 | .9526      | .0474 | 45112 | 4491 | 112 | 45125 | 4465 | 125 | 285  | 1.72  |
| 50000 | .95  | .95  | .05 | 45125 | 4750 | 125 | .9521      | .0479 | 45114 | 4535 | 114 | 45125 | 4513 | 125 | 238  | 1.18  |
| 50000 | .96  | .95  | .05 | 45125 | 4750 | 125 | .9517      | .0483 | 45116 | 4578 | 116 | 45125 | 4560 | 125 | 190  | .75   |
| 50000 | .97  | .95  | .05 | 45125 | 4750 | 125 | .9513      | .0487 | 45118 | 4621 | 118 | 45125 | 4608 | 125 | 143  | .42   |
| 50000 | .98  | .95  | .05 | 45125 | 4750 | 125 | .9509      | .0491 | 45121 | 4664 | 121 | 45125 | 4655 | 125 | 95   | .18   |
| 50000 | .99  | .95  | .05 | 45125 | 4750 | 125 | .9504      | .0496 | 45123 | 4707 | 123 | 45125 | 4703 | 125 | 48   | .05   |
| 50000 | 1.00 | .95  | .05 | 45125 | 4750 | 125 | .9500      | .0500 | 45125 | 4750 | 125 | 45125 | 4750 | 125 | 0    | .00   |
| 50000 | 1.01 | .95  | .05 | 45125 | 4750 | 125 | .9496      | .0504 | 45127 | 4793 | 127 | 45125 | 4798 | 125 | -48  | .04   |
| 50000 | 1.02 | .95  | .05 | 45125 | 4750 | 125 | .9491      | .0509 | 45130 | 4836 | 130 | 45125 | 4845 | 125 | -95  | .18   |
| 50000 | 1.03 | .95  | .05 | 45125 | 4750 | 125 | .9487      | .0513 | 45132 | 4879 | 132 | 45125 | 4893 | 125 | -143 | .40   |
| 50000 | 1.04 | .95  | .05 | 45125 | 4750 | 125 | .9483      | .0517 | 45134 | 4922 | 134 | 45125 | 4940 | 125 | -190 | .70   |
| 50000 | 1.05 | .95  | .05 | 45125 | 4750 | 125 | .9479      | .0521 | 45137 | 4964 | 137 | 45125 | 4988 | 125 | -238 | 1.08  |
| 50000 | 1.06 | .95  | .05 | 45125 | 4750 | 125 | .9474      | .0526 | 45139 | 5007 | 139 | 45125 | 5035 | 125 | -285 | 1.54  |
| 50000 | 1.07 | .95  | .05 | 45125 | 4750 | 125 | .9470      | .0530 | 45141 | 5050 | 141 | 45125 | 5083 | 125 | -333 | 2.08  |
| 50000 | 1.08 | .95  | .05 | 45125 | 4750 | 125 | .9466      | .0534 | 45144 | 5093 | 144 | 45125 | 5130 | 125 | -380 | 2.70  |
| 50000 | 1.09 | .95  | .05 | 45125 | 4750 | 125 | .9462      | .0538 | 45146 | 5135 | 146 | 45125 | 5178 | 125 | -428 | 3.39  |
| 50000 | 1.10 | .95  | .05 | 45125 | 4750 | 125 | .9458      | .0542 | 45148 | 5178 | 148 | 45125 | 5225 | 125 | -475 | 4.15  |
| 50000 | 1.11 | .95  | .05 | 45125 | 4750 | 125 | .9453      | .0547 | 45151 | 5221 | 151 | 45125 | 5273 | 125 | -523 | 4.98  |
| 50000 | 1.12 | .95  | .05 | 45125 | 4750 | 125 | .9449      | .0551 | 45153 | 5263 | 153 | 45125 | 5320 | 125 | -570 | 5.88  |
| 50000 | 1.13 | .95  | .05 | 45125 | 4750 | 125 | .9445      | .0555 | 45156 | 5306 | 156 | 45125 | 5368 | 125 | -618 | 6.85  |
| 50000 | 1.14 | .95  | .05 | 45125 | 4750 | 125 | .9441      | .0559 | 45158 | 5348 | 158 | 45125 | 5415 | 125 | -665 | 7.88  |
| 50000 | 1.15 | .95  | .05 | 45125 | 4750 | 125 | .9437      | .0563 | 45161 | 5391 | 161 | 45125 | 5463 | 125 | -713 | 8.98  |
| 50000 | 1.16 | .95  | .05 | 45125 | 4750 | 125 | .9433      | .0567 | 45163 | 5433 | 163 | 45125 | 5510 | 125 | -760 | 10.14 |
| 50000 | 1.17 | .95  | .05 | 45125 | 4750 | 125 | .9428      | .0572 | 45166 | 5476 | 166 | 45125 | 5558 | 125 | -808 | 11.37 |
| 50000 | 1.18 | .95  | .05 | 45125 | 4750 | 125 | .9424      | .0576 | 45169 | 5518 | 169 | 45125 | 5605 | 125 | -855 | 12.66 |
| 50000 | 1.19 | .95  | .05 | 45125 | 4750 | 125 | .9420      | .0580 | 45171 | 5560 | 171 | 45125 | 5653 | 125 | -903 | 14.00 |
| 50000 | 1.20 | .95  | .05 | 45125 | 4750 | 125 | .9416      | .0584 | 45174 | 5603 | 174 | 45125 | 5700 | 125 | -950 | 15.41 |
| 50000 | .80  | 1.00 | .00 | 50000 | 0    | 0   | 1.000<br>0 | .0000 | 50000 | 0    | 0   | 50000 | 0    | 0   | 0    | 15.41 |
| 50000 | .81  | 1.00 | .00 | 50000 | 0    | 0   | 1.000<br>0 | .0000 | 50000 | 0    | 0   | 50000 | 0    | 0   | 0    | 15.41 |
| 50000 | .82  | 1.00 | .00 | 50000 | 0    | 0   | 1.000<br>0 | .0000 | 50000 | 0    | 0   | 50000 | 0    | 0   | 0    | 15.41 |

|       |     |      |     |       |   |   |            |       |       |   |   |       |   |   |   |       |
|-------|-----|------|-----|-------|---|---|------------|-------|-------|---|---|-------|---|---|---|-------|
| 50000 | .83 | 1.00 | .00 | 50000 | 0 | 0 | 1.000<br>0 | .0000 | 50000 | 0 | 0 | 50000 | 0 | 0 | 0 | 15.41 |
| 50000 | .84 | 1.00 | .00 | 50000 | 0 | 0 | 1.000<br>0 | .0000 | 50000 | 0 | 0 | 50000 | 0 | 0 | 0 | 15.41 |
| 50000 | .85 | 1.00 | .00 | 50000 | 0 | 0 | 1.000<br>0 | .0000 | 50000 | 0 | 0 | 50000 | 0 | 0 | 0 | 15.41 |
| 50000 | .86 | 1.00 | .00 | 50000 | 0 | 0 | 1.000<br>0 | .0000 | 50000 | 0 | 0 | 50000 | 0 | 0 | 0 | 15.41 |
| 50000 | .87 | 1.00 | .00 | 50000 | 0 | 0 | 1.000<br>0 | .0000 | 50000 | 0 | 0 | 50000 | 0 | 0 | 0 | 15.41 |
| 50000 | .88 | 1.00 | .00 | 50000 | 0 | 0 | 1.000<br>0 | .0000 | 50000 | 0 | 0 | 50000 | 0 | 0 | 0 | 15.41 |
| 50000 | .89 | 1.00 | .00 | 50000 | 0 | 0 | 1.000<br>0 | .0000 | 50000 | 0 | 0 | 50000 | 0 | 0 | 0 | 15.41 |
| 50000 | .90 | 1.00 | .00 | 50000 | 0 | 0 | 1.000<br>0 | .0000 | 50000 | 0 | 0 | 50000 | 0 | 0 | 0 | 15.41 |
| 50000 | .91 | 1.00 | .00 | 50000 | 0 | 0 | 1.000<br>0 | .0000 | 50000 | 0 | 0 | 50000 | 0 | 0 | 0 | 15.41 |
| 50000 | .92 | 1.00 | .00 | 50000 | 0 | 0 | 1.000<br>0 | .0000 | 50000 | 0 | 0 | 50000 | 0 | 0 | 0 | 15.41 |
| 50000 | .93 | 1.00 | .00 | 50000 | 0 | 0 | 1.000<br>0 | .0000 | 50000 | 0 | 0 | 50000 | 0 | 0 | 0 | 15.41 |
| 50000 | .94 | 1.00 | .00 | 50000 | 0 | 0 | 1.000<br>0 | .0000 | 50000 | 0 | 0 | 50000 | 0 | 0 | 0 | 15.41 |
| 50000 | .95 | 1.00 | .00 | 50000 | 0 | 0 | 1.000<br>0 | .0000 | 50000 | 0 | 0 | 50000 | 0 | 0 | 0 | 15.41 |
| 50000 | .96 | 1.00 | .00 | 50000 | 0 | 0 | 1.000<br>0 | .0000 | 50000 | 0 | 0 | 50000 | 0 | 0 | 0 | 15.41 |
| 50000 | .97 | 1.00 | .00 | 50000 | 0 | 0 | 1.000<br>0 | .0000 | 50000 | 0 | 0 | 50000 | 0 | 0 | 0 | 15.41 |
| 50000 | .98 | 1.00 | .00 | 50000 | 0 | 0 | 1.000<br>0 | .0000 | 50000 | 0 | 0 | 50000 | 0 | 0 | 0 | 15.41 |
| 50000 | .99 | 1.00 | .00 | 50000 | 0 | 0 | 1.000<br>0 | .0000 | 50000 | 0 | 0 | 50000 | 0 | 0 | 0 | 15.41 |

|       |      |      |     |       |   |   |            |       |       |   |   |       |   |   |   |       |
|-------|------|------|-----|-------|---|---|------------|-------|-------|---|---|-------|---|---|---|-------|
| 50000 | 1.00 | 1.00 | .00 | 50000 | 0 | 0 | 1.000<br>0 | .0000 | 50000 | 0 | 0 | 50000 | 0 | 0 | 0 | 15.41 |
| 50000 | 1.01 | 1.00 | .00 | 50000 | 0 | 0 | 1.000<br>0 | .0000 | 50000 | 0 | 0 | 50000 | 0 | 0 | 0 | 15.41 |
| 50000 | 1.02 | 1.00 | .00 | 50000 | 0 | 0 | 1.000<br>0 | .0000 | 50000 | 0 | 0 | 50000 | 0 | 0 | 0 | 15.41 |
| 50000 | 1.03 | 1.00 | .00 | 50000 | 0 | 0 | 1.000<br>0 | .0000 | 50000 | 0 | 0 | 50000 | 0 | 0 | 0 | 15.41 |
| 50000 | 1.04 | 1.00 | .00 | 50000 | 0 | 0 | 1.000<br>0 | .0000 | 50000 | 0 | 0 | 50000 | 0 | 0 | 0 | 15.41 |
| 50000 | 1.05 | 1.00 | .00 | 50000 | 0 | 0 | 1.000<br>0 | .0000 | 50000 | 0 | 0 | 50000 | 0 | 0 | 0 | 15.41 |
| 50000 | 1.06 | 1.00 | .00 | 50000 | 0 | 0 | 1.000<br>0 | .0000 | 50000 | 0 | 0 | 50000 | 0 | 0 | 0 | 15.41 |
| 50000 | 1.07 | 1.00 | .00 | 50000 | 0 | 0 | 1.000<br>0 | .0000 | 50000 | 0 | 0 | 50000 | 0 | 0 | 0 | 15.41 |
| 50000 | 1.08 | 1.00 | .00 | 50000 | 0 | 0 | 1.000<br>0 | .0000 | 50000 | 0 | 0 | 50000 | 0 | 0 | 0 | 15.41 |
| 50000 | 1.09 | 1.00 | .00 | 50000 | 0 | 0 | 1.000<br>0 | .0000 | 50000 | 0 | 0 | 50000 | 0 | 0 | 0 | 15.41 |
| 50000 | 1.10 | 1.00 | .00 | 50000 | 0 | 0 | 1.000<br>0 | .0000 | 50000 | 0 | 0 | 50000 | 0 | 0 | 0 | 15.41 |
| 50000 | 1.11 | 1.00 | .00 | 50000 | 0 | 0 | 1.000<br>0 | .0000 | 50000 | 0 | 0 | 50000 | 0 | 0 | 0 | 15.41 |
| 50000 | 1.12 | 1.00 | .00 | 50000 | 0 | 0 | 1.000<br>0 | .0000 | 50000 | 0 | 0 | 50000 | 0 | 0 | 0 | 15.41 |
| 50000 | 1.13 | 1.00 | .00 | 50000 | 0 | 0 | 1.000<br>0 | .0000 | 50000 | 0 | 0 | 50000 | 0 | 0 | 0 | 15.41 |
| 50000 | 1.14 | 1.00 | .00 | 50000 | 0 | 0 | 1.000<br>0 | .0000 | 50000 | 0 | 0 | 50000 | 0 | 0 | 0 | 15.41 |
| 50000 | 1.15 | 1.00 | .00 | 50000 | 0 | 0 | 1.000<br>0 | .0000 | 50000 | 0 | 0 | 50000 | 0 | 0 | 0 | 15.41 |
| 50000 | 1.16 | 1.00 | .00 | 50000 | 0 | 0 | 1.000<br>0 | .0000 | 50000 | 0 | 0 | 50000 | 0 | 0 | 0 | 15.41 |

|        |      |      |     |       |      |       |            |       |       |      |       |       |      |       |      |       |
|--------|------|------|-----|-------|------|-------|------------|-------|-------|------|-------|-------|------|-------|------|-------|
| 50000  | 1.17 | 1.00 | .00 | 50000 | 0    | 0     | 1.000<br>0 | .0000 | 50000 | 0    | 0     | 50000 | 0    | 0     | 0    | 15.41 |
| 50000  | 1.18 | 1.00 | .00 | 50000 | 0    | 0     | 1.000<br>0 | .0000 | 50000 | 0    | 0     | 50000 | 0    | 0     | 0    | 15.41 |
| 50000  | 1.19 | 1.00 | .00 | 50000 | 0    | 0     | 1.000<br>0 | .0000 | 50000 | 0    | 0     | 50000 | 0    | 0     | 0    | 15.41 |
| 50000  | 1.20 | 1.00 | .00 | 50000 | 0    | 0     | 1.000<br>0 | .0000 | 50000 | 0    | 0     | 50000 | 0    | 0     | 0    | 15.41 |
| 100000 | .80  | .05  | .95 | 250   | 9500 | 90250 | .0413      | .9587 | 167   | 7766 | 90167 | 250   | 7600 | 90250 | 1900 | 44.61 |
| 100000 | .81  | .05  | .95 | 250   | 9500 | 90250 | .0417      | .9583 | 171   | 7853 | 90171 | 250   | 7695 | 90250 | 1805 | 39.77 |
| 100000 | .82  | .05  | .95 | 250   | 9500 | 90250 | .0422      | .9578 | 175   | 7940 | 90175 | 250   | 7790 | 90250 | 1710 | 35.26 |
| 100000 | .83  | .05  | .95 | 250   | 9500 | 90250 | .0426      | .9574 | 179   | 8028 | 90179 | 250   | 7885 | 90250 | 1615 | 31.08 |
| 100000 | .84  | .05  | .95 | 250   | 9500 | 90250 | .0431      | .9569 | 183   | 8115 | 90183 | 250   | 7980 | 90250 | 1520 | 27.21 |
| 100000 | .85  | .05  | .95 | 250   | 9500 | 90250 | .0435      | .9565 | 186   | 8202 | 90186 | 250   | 8075 | 90250 | 1425 | 23.65 |
| 100000 | .86  | .05  | .95 | 250   | 9500 | 90250 | .0439      | .9561 | 190   | 8289 | 90190 | 250   | 8170 | 90250 | 1330 | 20.37 |
| 100000 | .87  | .05  | .95 | 250   | 9500 | 90250 | .0444      | .9556 | 194   | 8376 | 90194 | 250   | 8265 | 90250 | 1235 | 17.37 |
| 100000 | .88  | .05  | .95 | 250   | 9500 | 90250 | .0448      | .9552 | 199   | 8463 | 90199 | 250   | 8360 | 90250 | 1140 | 14.64 |
| 100000 | .89  | .05  | .95 | 250   | 9500 | 90250 | .0452      | .9548 | 203   | 8550 | 90203 | 250   | 8455 | 90250 | 1045 | 12.17 |
| 100000 | .90  | .05  | .95 | 250   | 9500 | 90250 | .0457      | .9543 | 207   | 8637 | 90207 | 250   | 8550 | 90250 | 950  | 9.95  |
| 100000 | .91  | .05  | .95 | 250   | 9500 | 90250 | .0461      | .9539 | 211   | 8723 | 90211 | 250   | 8645 | 90250 | 855  | 7.98  |
| 100000 | .92  | .05  | .95 | 250   | 9500 | 90250 | .0466      | .9534 | 215   | 8810 | 90215 | 250   | 8740 | 90250 | 760  | 6.24  |
| 100000 | .93  | .05  | .95 | 250   | 9500 | 90250 | .0470      | .9530 | 219   | 8896 | 90219 | 250   | 8835 | 90250 | 665  | 4.73  |
| 100000 | .94  | .05  | .95 | 250   | 9500 | 90250 | .0474      | .9526 | 224   | 8983 | 90224 | 250   | 8930 | 90250 | 570  | 3.44  |
| 100000 | .95  | .05  | .95 | 250   | 9500 | 90250 | .0479      | .9521 | 228   | 9069 | 90228 | 250   | 9025 | 90250 | 475  | 2.36  |
| 100000 | .96  | .05  | .95 | 250   | 9500 | 90250 | .0483      | .9517 | 232   | 9156 | 90232 | 250   | 9120 | 90250 | 380  | 1.50  |
| 100000 | .97  | .05  | .95 | 250   | 9500 | 90250 | .0487      | .9513 | 237   | 9242 | 90237 | 250   | 9215 | 90250 | 285  | .84   |
| 100000 | .98  | .05  | .95 | 250   | 9500 | 90250 | .0491      | .9509 | 241   | 9328 | 90241 | 250   | 9310 | 90250 | 190  | .37   |
| 100000 | .99  | .05  | .95 | 250   | 9500 | 90250 | .0496      | .9504 | 246   | 9414 | 90246 | 250   | 9405 | 90250 | 95   | .09   |
| 100000 | 1.00 | .05  | .95 | 250   | 9500 | 90250 | .0500      | .9500 | 250   | 9500 | 90250 | 250   | 9500 | 90250 | 0    | .00   |
| 100000 | 1.01 | .05  | .95 | 250   | 9500 | 90250 | .0504      | .9496 | 255   | 9586 | 90255 | 250   | 9595 | 90250 | -95  | .09   |
| 100000 | 1.02 | .05  | .95 | 250   | 9500 | 90250 | .0509      | .9491 | 259   | 9672 | 90259 | 250   | 9690 | 90250 | -190 | .35   |
| 100000 | 1.03 | .05  | .95 | 250   | 9500 | 90250 | .0513      | .9487 | 264   | 9758 | 90264 | 250   | 9785 | 90250 | -285 | .79   |
| 100000 | 1.04 | .05  | .95 | 250   | 9500 | 90250 | .0517      | .9483 | 268   | 9843 | 90268 | 250   | 9880 | 90250 | -380 | 1.39  |

|        |      |     |     |      |       |       |       |       |     |       |       |      |       |       |       |        |
|--------|------|-----|-----|------|-------|-------|-------|-------|-----|-------|-------|------|-------|-------|-------|--------|
| 100000 | 1.05 | .05 | .95 | 250  | 9500  | 90250 | .0521 | .9479 | 273 | 9929  | 90273 | 250  | 9975  | 90250 | -475  | 2.16   |
| 100000 | 1.06 | .05 | .95 | 250  | 9500  | 90250 | .0526 | .9474 | 278 | 10015 | 90278 | 250  | 10070 | 90250 | -570  | 3.08   |
| 100000 | 1.07 | .05 | .95 | 250  | 9500  | 90250 | .0530 | .9470 | 282 | 10100 | 90282 | 250  | 10165 | 90250 | -665  | 4.16   |
| 100000 | 1.08 | .05 | .95 | 250  | 9500  | 90250 | .0534 | .9466 | 287 | 10185 | 90287 | 250  | 10260 | 90250 | -760  | 5.39   |
| 100000 | 1.09 | .05 | .95 | 250  | 9500  | 90250 | .0538 | .9462 | 292 | 10271 | 90292 | 250  | 10355 | 90250 | -855  | 6.77   |
| 100000 | 1.10 | .05 | .95 | 250  | 9500  | 90250 | .0542 | .9458 | 297 | 10356 | 90297 | 250  | 10450 | 90250 | -950  | 8.29   |
| 100000 | 1.11 | .05 | .95 | 250  | 9500  | 90250 | .0547 | .9453 | 302 | 10441 | 90302 | 250  | 10545 | 90250 | -1045 | 9.96   |
| 100000 | 1.12 | .05 | .95 | 250  | 9500  | 90250 | .0551 | .9449 | 307 | 10526 | 90307 | 250  | 10640 | 90250 | -1140 | 11.76  |
| 100000 | 1.13 | .05 | .95 | 250  | 9500  | 90250 | .0555 | .9445 | 312 | 10612 | 90312 | 250  | 10735 | 90250 | -1235 | 13.70  |
| 100000 | 1.14 | .05 | .95 | 250  | 9500  | 90250 | .0559 | .9441 | 317 | 10697 | 90317 | 250  | 10830 | 90250 | -1330 | 15.76  |
| 100000 | 1.15 | .05 | .95 | 250  | 9500  | 90250 | .0563 | .9437 | 322 | 10782 | 90322 | 250  | 10925 | 90250 | -1425 | 17.96  |
| 100000 | 1.16 | .05 | .95 | 250  | 9500  | 90250 | .0567 | .9433 | 327 | 10866 | 90327 | 250  | 11020 | 90250 | -1520 | 20.29  |
| 100000 | 1.17 | .05 | .95 | 250  | 9500  | 90250 | .0572 | .9428 | 332 | 10951 | 90332 | 250  | 11115 | 90250 | -1615 | 22.74  |
| 100000 | 1.18 | .05 | .95 | 250  | 9500  | 90250 | .0576 | .9424 | 337 | 11036 | 90337 | 250  | 11210 | 90250 | -1710 | 25.31  |
| 100000 | 1.19 | .05 | .95 | 250  | 9500  | 90250 | .0580 | .9420 | 342 | 11121 | 90342 | 250  | 11305 | 90250 | -1805 | 28.00  |
| 100000 | 1.20 | .05 | .95 | 250  | 9500  | 90250 | .0584 | .9416 | 347 | 11205 | 90347 | 250  | 11400 | 90250 | -1900 | 30.81  |
| 100000 | .80  | .10 | .90 | 1000 | 18000 | 81000 | .0851 | .9149 | 698 | 15005 | 80698 | 1000 | 14400 | 81000 | 3600  | 156.71 |
| 100000 | .81  | .10 | .90 | 1000 | 18000 | 81000 | .0858 | .9142 | 712 | 15157 | 80712 | 1000 | 14580 | 81000 | 3420  | 139.89 |
| 100000 | .82  | .10 | .90 | 1000 | 18000 | 81000 | .0866 | .9134 | 726 | 15308 | 80726 | 1000 | 14760 | 81000 | 3240  | 124.21 |
| 100000 | .83  | .10 | .90 | 1000 | 18000 | 81000 | .0874 | .9126 | 740 | 15460 | 80740 | 1000 | 14940 | 81000 | 3060  | 109.63 |
| 100000 | .84  | .10 | .90 | 1000 | 18000 | 81000 | .0881 | .9119 | 754 | 15611 | 80754 | 1000 | 15120 | 81000 | 2880  | 96.10  |
| 100000 | .85  | .10 | .90 | 1000 | 18000 | 81000 | .0889 | .9111 | 769 | 15762 | 80769 | 1000 | 15300 | 81000 | 2700  | 83.60  |
| 100000 | .86  | .10 | .90 | 1000 | 18000 | 81000 | .0897 | .9103 | 784 | 15913 | 80784 | 1000 | 15480 | 81000 | 2520  | 72.10  |
| 100000 | .87  | .10 | .90 | 1000 | 18000 | 81000 | .0904 | .9096 | 798 | 16063 | 80798 | 1000 | 15660 | 81000 | 2340  | 61.55  |
| 100000 | .88  | .10 | .90 | 1000 | 18000 | 81000 | .0912 | .9088 | 813 | 16214 | 80813 | 1000 | 15840 | 81000 | 2160  | 51.93  |
| 100000 | .89  | .10 | .90 | 1000 | 18000 | 81000 | .0919 | .9081 | 828 | 16364 | 80828 | 1000 | 16020 | 81000 | 1980  | 43.22  |
| 100000 | .90  | .10 | .90 | 1000 | 18000 | 81000 | .0927 | .9073 | 843 | 16513 | 80843 | 1000 | 16200 | 81000 | 1800  | 35.38  |
| 100000 | .91  | .10 | .90 | 1000 | 18000 | 81000 | .0934 | .9066 | 858 | 16663 | 80858 | 1000 | 16380 | 81000 | 1620  | 28.39  |
| 100000 | .92  | .10 | .90 | 1000 | 18000 | 81000 | .0942 | .9058 | 874 | 16812 | 80874 | 1000 | 16560 | 81000 | 1440  | 22.23  |

|        |      |     |     |      |       |       |       |       |      |       |       |      |       |       |       |        |
|--------|------|-----|-----|------|-------|-------|-------|-------|------|-------|-------|------|-------|-------|-------|--------|
| 100000 | .93  | .10 | .90 | 1000 | 18000 | 81000 | .0949 | .9051 | 889  | 16962 | 80889 | 1000 | 16740 | 81000 | 1260  | 16.86  |
| 100000 | .94  | .10 | .90 | 1000 | 18000 | 81000 | .0956 | .9044 | 905  | 17111 | 80905 | 1000 | 16920 | 81000 | 1080  | 12.28  |
| 100000 | .95  | .10 | .90 | 1000 | 18000 | 81000 | .0964 | .9036 | 920  | 17259 | 80920 | 1000 | 17100 | 81000 | 900   | 8.45   |
| 100000 | .96  | .10 | .90 | 1000 | 18000 | 81000 | .0971 | .9029 | 936  | 17408 | 80936 | 1000 | 17280 | 81000 | 720   | 5.36   |
| 100000 | .97  | .10 | .90 | 1000 | 18000 | 81000 | .0978 | .9022 | 952  | 17556 | 80952 | 1000 | 17460 | 81000 | 540   | 2.99   |
| 100000 | .98  | .10 | .90 | 1000 | 18000 | 81000 | .0986 | .9014 | 968  | 17704 | 80968 | 1000 | 17640 | 81000 | 360   | 1.32   |
| 100000 | .99  | .10 | .90 | 1000 | 18000 | 81000 | .0993 | .9007 | 984  | 17852 | 80984 | 1000 | 17820 | 81000 | 180   | .33    |
| 100000 | 1.00 | .10 | .90 | 1000 | 18000 | 81000 | .1000 | .9000 | 1000 | 18000 | 81000 | 1000 | 18000 | 81000 | 0     | .00    |
| 100000 | 1.01 | .10 | .90 | 1000 | 18000 | 81000 | .1007 | .8993 | 1016 | 18147 | 81016 | 1000 | 18180 | 81000 | -180  | .32    |
| 100000 | 1.02 | .10 | .90 | 1000 | 18000 | 81000 | .1014 | .8986 | 1033 | 18295 | 81033 | 1000 | 18360 | 81000 | -360  | 1.28   |
| 100000 | 1.03 | .10 | .90 | 1000 | 18000 | 81000 | .1021 | .8979 | 1049 | 18442 | 81049 | 1000 | 18540 | 81000 | -540  | 2.85   |
| 100000 | 1.04 | .10 | .90 | 1000 | 18000 | 81000 | .1029 | .8971 | 1066 | 18589 | 81066 | 1000 | 18720 | 81000 | -720  | 5.02   |
| 100000 | 1.05 | .10 | .90 | 1000 | 18000 | 81000 | .1036 | .8964 | 1082 | 18735 | 81082 | 1000 | 18900 | 81000 | -900  | 7.79   |
| 100000 | 1.06 | .10 | .90 | 1000 | 18000 | 81000 | .1043 | .8957 | 1099 | 18882 | 81099 | 1000 | 19080 | 81000 | -1080 | 11.13  |
| 100000 | 1.07 | .10 | .90 | 1000 | 18000 | 81000 | .1050 | .8950 | 1116 | 19028 | 81116 | 1000 | 19260 | 81000 | -1260 | 15.03  |
| 100000 | 1.08 | .10 | .90 | 1000 | 18000 | 81000 | .1057 | .8943 | 1133 | 19174 | 81133 | 1000 | 19440 | 81000 | -1440 | 19.48  |
| 100000 | 1.09 | .10 | .90 | 1000 | 18000 | 81000 | .1064 | .8936 | 1150 | 19320 | 81150 | 1000 | 19620 | 81000 | -1620 | 24.48  |
| 100000 | 1.10 | .10 | .90 | 1000 | 18000 | 81000 | .1071 | .8929 | 1167 | 19466 | 81167 | 1000 | 19800 | 81000 | -1800 | 30.00  |
| 100000 | 1.11 | .10 | .90 | 1000 | 18000 | 81000 | .1078 | .8922 | 1184 | 19611 | 81184 | 1000 | 19980 | 81000 | -1980 | 36.05  |
| 100000 | 1.12 | .10 | .90 | 1000 | 18000 | 81000 | .1085 | .8915 | 1202 | 19757 | 81202 | 1000 | 20160 | 81000 | -2160 | 42.60  |
| 100000 | 1.13 | .10 | .90 | 1000 | 18000 | 81000 | .1091 | .8909 | 1219 | 19902 | 81219 | 1000 | 20340 | 81000 | -2340 | 49.64  |
| 100000 | 1.14 | .10 | .90 | 1000 | 18000 | 81000 | .1098 | .8902 | 1237 | 20047 | 81237 | 1000 | 20520 | 81000 | -2520 | 57.18  |
| 100000 | 1.15 | .10 | .90 | 1000 | 18000 | 81000 | .1105 | .8895 | 1254 | 20191 | 81254 | 1000 | 20700 | 81000 | -2700 | 65.19  |
| 100000 | 1.16 | .10 | .90 | 1000 | 18000 | 81000 | .1112 | .8888 | 1272 | 20336 | 81272 | 1000 | 20880 | 81000 | -2880 | 73.68  |
| 100000 | 1.17 | .10 | .90 | 1000 | 18000 | 81000 | .1119 | .8881 | 1290 | 20480 | 81290 | 1000 | 21060 | 81000 | -3060 | 82.62  |
| 100000 | 1.18 | .10 | .90 | 1000 | 18000 | 81000 | .1126 | .8874 | 1308 | 20624 | 81308 | 1000 | 21240 | 81000 | -3240 | 92.02  |
| 100000 | 1.19 | .10 | .90 | 1000 | 18000 | 81000 | .1132 | .8868 | 1326 | 20768 | 81326 | 1000 | 21420 | 81000 | -3420 | 101.86 |
| 100000 | 1.20 | .10 | .90 | 1000 | 18000 | 81000 | .1139 | .8861 | 1344 | 20912 | 81344 | 1000 | 21600 | 81000 | -3600 | 112.15 |
| 100000 | .80  | .15 | .85 | 2250 | 25500 | 72250 | .1312 | .8688 | 1633 | 21633 | 71633 | 2250 | 20400 | 72250 | 5100  | 308.46 |
| 100000 | .81  | .15 | .85 | 2250 | 25500 | 72250 | .1322 | .8678 | 1662 | 21830 | 71662 | 2250 | 20655 | 72250 | 4845  | 275.6  |

|        |      |     |     |      |       |       |       |       |      |       |       |      |       |       |       |        |
|--------|------|-----|-----|------|-------|-------|-------|-------|------|-------|-------|------|-------|-------|-------|--------|
|        |      |     |     |      |       |       |       |       |      |       |       |      |       |       |       | 9      |
| 100000 | .82  | .15 | .85 | 2250 | 25500 | 72250 | .1332 | .8668 | 1692 | 22026 | 71692 | 2250 | 20910 | 72250 | 4590  | 245.08 |
| 100000 | .83  | .15 | .85 | 2250 | 25500 | 72250 | .1341 | .8659 | 1721 | 22222 | 71721 | 2250 | 21165 | 72250 | 4335  | 216.56 |
| 100000 | .84  | .15 | .85 | 2250 | 25500 | 72250 | .1351 | .8649 | 1751 | 22418 | 71751 | 2250 | 21420 | 72250 | 4080  | 190.05 |
| 100000 | .85  | .15 | .85 | 2250 | 25500 | 72250 | .1361 | .8639 | 1781 | 22613 | 71781 | 2250 | 21675 | 72250 | 3825  | 165.52 |
| 100000 | .86  | .15 | .85 | 2250 | 25500 | 72250 | .1370 | .8630 | 1811 | 22808 | 71811 | 2250 | 21930 | 72250 | 3570  | 142.89 |
| 100000 | .87  | .15 | .85 | 2250 | 25500 | 72250 | .1380 | .8620 | 1841 | 23002 | 71841 | 2250 | 22185 | 72250 | 3315  | 122.11 |
| 100000 | .88  | .15 | .85 | 2250 | 25500 | 72250 | .1390 | .8610 | 1872 | 23197 | 71872 | 2250 | 22440 | 72250 | 3060  | 103.14 |
| 100000 | .89  | .15 | .85 | 2250 | 25500 | 72250 | .1399 | .8601 | 1902 | 23390 | 71902 | 2250 | 22695 | 72250 | 2805  | 85.92  |
| 100000 | .90  | .15 | .85 | 2250 | 25500 | 72250 | .1408 | .8592 | 1933 | 23584 | 71933 | 2250 | 22950 | 72250 | 2550  | 70.40  |
| 100000 | .91  | .15 | .85 | 2250 | 25500 | 72250 | .1418 | .8582 | 1964 | 23777 | 71964 | 2250 | 23205 | 72250 | 2295  | 56.55  |
| 100000 | .92  | .15 | .85 | 2250 | 25500 | 72250 | .1427 | .8573 | 1995 | 23970 | 71995 | 2250 | 23460 | 72250 | 2040  | 44.31  |
| 100000 | .93  | .15 | .85 | 2250 | 25500 | 72250 | .1436 | .8564 | 2026 | 24162 | 72026 | 2250 | 23715 | 72250 | 1785  | 33.65  |
| 100000 | .94  | .15 | .85 | 2250 | 25500 | 72250 | .1446 | .8554 | 2058 | 24354 | 72058 | 2250 | 23970 | 72250 | 1530  | 24.52  |
| 100000 | .95  | .15 | .85 | 2250 | 25500 | 72250 | .1455 | .8545 | 2089 | 24546 | 72089 | 2250 | 24225 | 72250 | 1275  | 16.89  |
| 100000 | .96  | .15 | .85 | 2250 | 25500 | 72250 | .1464 | .8536 | 2121 | 24738 | 72121 | 2250 | 24480 | 72250 | 1020  | 10.73  |
| 100000 | .97  | .15 | .85 | 2250 | 25500 | 72250 | .1473 | .8527 | 2153 | 24929 | 72153 | 2250 | 24735 | 72250 | 765   | 5.99   |
| 100000 | .98  | .15 | .85 | 2250 | 25500 | 72250 | .1482 | .8518 | 2185 | 25119 | 72185 | 2250 | 24990 | 72250 | 510   | 2.64   |
| 100000 | .99  | .15 | .85 | 2250 | 25500 | 72250 | .1491 | .8509 | 2218 | 25310 | 72218 | 2250 | 25245 | 72250 | 255   | .66    |
| 100000 | 1.00 | .15 | .85 | 2250 | 25500 | 72250 | .1500 | .8500 | 2250 | 25500 | 72250 | 2250 | 25500 | 72250 | 0     | .00    |
| 100000 | 1.01 | .15 | .85 | 2250 | 25500 | 72250 | .1509 | .8491 | 2283 | 25690 | 72283 | 2250 | 25755 | 72250 | -255  | .65    |
| 100000 | 1.02 | .15 | .85 | 2250 | 25500 | 72250 | .1518 | .8482 | 2315 | 25879 | 72315 | 2250 | 26010 | 72250 | -510  | 2.56   |
| 100000 | 1.03 | .15 | .85 | 2250 | 25500 | 72250 | .1527 | .8473 | 2348 | 26069 | 72348 | 2250 | 26265 | 72250 | -765  | 5.73   |
| 100000 | 1.04 | .15 | .85 | 2250 | 25500 | 72250 | .1535 | .8465 | 2381 | 26257 | 72381 | 2250 | 26520 | 72250 | -1020 | 10.11  |
| 100000 | 1.05 | .15 | .85 | 2250 | 25500 | 72250 | .1544 | .8456 | 2415 | 26446 | 72415 | 2250 | 26775 | 72250 | -1275 | 15.68  |
| 100000 | 1.06 | .15 | .85 | 2250 | 25500 | 72250 | .1553 | .8447 | 2448 | 26634 | 72448 | 2250 | 27030 | 72250 | -1530 | 22.42  |

|        |      |     |     |      |       |       |       |       |      |       |       |      |       |       |       |        |
|--------|------|-----|-----|------|-------|-------|-------|-------|------|-------|-------|------|-------|-------|-------|--------|
| 100000 | 1.07 | .15 | .85 | 2250 | 25500 | 72250 | .1561 | .8439 | 2481 | 26822 | 72481 | 2250 | 27285 | 72250 | -1785 | 30.31  |
| 100000 | 1.08 | .15 | .85 | 2250 | 25500 | 72250 | .1570 | .8430 | 2515 | 27010 | 72515 | 2250 | 27540 | 72250 | -2040 | 39.32  |
| 100000 | 1.09 | .15 | .85 | 2250 | 25500 | 72250 | .1579 | .8421 | 2549 | 27197 | 72549 | 2250 | 27795 | 72250 | -2295 | 49.43  |
| 100000 | 1.10 | .15 | .85 | 2250 | 25500 | 72250 | .1587 | .8413 | 2583 | 27384 | 72583 | 2250 | 28050 | 72250 | -2550 | 60.62  |
| 100000 | 1.11 | .15 | .85 | 2250 | 25500 | 72250 | .1595 | .8405 | 2617 | 27571 | 72617 | 2250 | 28305 | 72250 | -2805 | 72.87  |
| 100000 | 1.12 | .15 | .85 | 2250 | 25500 | 72250 | .1604 | .8396 | 2651 | 27757 | 72651 | 2250 | 28560 | 72250 | -3060 | 86.16  |
| 100000 | 1.13 | .15 | .85 | 2250 | 25500 | 72250 | .1612 | .8388 | 2686 | 27944 | 72686 | 2250 | 28815 | 72250 | -3315 | 100.47 |
| 100000 | 1.14 | .15 | .85 | 2250 | 25500 | 72250 | .1621 | .8379 | 2720 | 28130 | 72720 | 2250 | 29070 | 72250 | -3570 | 115.78 |
| 100000 | 1.15 | .15 | .85 | 2250 | 25500 | 72250 | .1629 | .8371 | 2755 | 28315 | 72755 | 2250 | 29325 | 72250 | -3825 | 132.08 |
| 100000 | 1.16 | .15 | .85 | 2250 | 25500 | 72250 | .1637 | .8363 | 2790 | 28500 | 72790 | 2250 | 29580 | 72250 | -4080 | 149.34 |
| 100000 | 1.17 | .15 | .85 | 2250 | 25500 | 72250 | .1645 | .8355 | 2825 | 28685 | 72825 | 2250 | 29835 | 72250 | -4335 | 167.56 |
| 100000 | 1.18 | .15 | .85 | 2250 | 25500 | 72250 | .1654 | .8346 | 2860 | 28870 | 72860 | 2250 | 30090 | 72250 | -4590 | 186.71 |
| 100000 | 1.19 | .15 | .85 | 2250 | 25500 | 72250 | .1662 | .8338 | 2895 | 29055 | 72895 | 2250 | 30345 | 72250 | -4845 | 206.78 |
| 100000 | 1.20 | .15 | .85 | 2250 | 25500 | 72250 | .1670 | .8330 | 2931 | 29239 | 72931 | 2250 | 30600 | 72250 | -5100 | 227.76 |
| 100000 | .80  | .20 | .80 | 4000 | 32000 | 64000 | .1795 | .8205 | 3015 | 27569 | 63015 | 4000 | 25600 | 64000 | 6400  | 477.55 |
| 100000 | .81  | .20 | .80 | 4000 | 32000 | 64000 | .1806 | .8194 | 3063 | 27795 | 63063 | 4000 | 25920 | 64000 | 6080  | 427.29 |
| 100000 | .82  | .20 | .80 | 4000 | 32000 | 64000 | .1817 | .8183 | 3110 | 28020 | 63110 | 4000 | 26240 | 64000 | 5760  | 380.24 |
| 100000 | .83  | .20 | .80 | 4000 | 32000 | 64000 | .1827 | .8173 | 3158 | 28244 | 63158 | 4000 | 26560 | 64000 | 5440  | 336.33 |
| 100000 | .84  | .20 | .80 | 4000 | 32000 | 64000 | .1838 | .8162 | 3206 | 28469 | 63206 | 4000 | 26880 | 64000 | 5120  | 295.47 |
| 100000 | .85  | .20 | .80 | 4000 | 32000 | 64000 | .1849 | .8151 | 3254 | 28692 | 63254 | 4000 | 27200 | 64000 | 4800  | 257.57 |



|        |      |     |     |      |       |       |       |       |      |       |       |      |       |       |       |        |
|--------|------|-----|-----|------|-------|-------|-------|-------|------|-------|-------|------|-------|-------|-------|--------|
| 100000 | .86  | .20 | .80 | 4000 | 32000 | 64000 | .1859 | .8141 | 3302 | 28916 | 63302 | 4000 | 27520 | 64000 | 4480  | 222.57 |
| 100000 | .87  | .20 | .80 | 4000 | 32000 | 64000 | .1870 | .8130 | 3351 | 29139 | 63351 | 4000 | 27840 | 64000 | 4160  | 190.38 |
| 100000 | .88  | .20 | .80 | 4000 | 32000 | 64000 | .1880 | .8120 | 3399 | 29361 | 63399 | 4000 | 28160 | 64000 | 3840  | 160.94 |
| 100000 | .89  | .20 | .80 | 4000 | 32000 | 64000 | .1891 | .8109 | 3448 | 29583 | 63448 | 4000 | 28480 | 64000 | 3520  | 134.19 |
| 100000 | .90  | .20 | .80 | 4000 | 32000 | 64000 | .1901 | .8099 | 3498 | 29805 | 63498 | 4000 | 28800 | 64000 | 3200  | 110.05 |
| 100000 | .91  | .20 | .80 | 4000 | 32000 | 64000 | .1911 | .8089 | 3547 | 30026 | 63547 | 4000 | 29120 | 64000 | 2880  | 88.47  |
| 100000 | .92  | .20 | .80 | 4000 | 32000 | 64000 | .1921 | .8079 | 3596 | 30247 | 63596 | 4000 | 29440 | 64000 | 2560  | 69.38  |
| 100000 | .93  | .20 | .80 | 4000 | 32000 | 64000 | .1931 | .8069 | 3646 | 30468 | 63646 | 4000 | 29760 | 64000 | 2240  | 52.72  |
| 100000 | .94  | .20 | .80 | 4000 | 32000 | 64000 | .1941 | .8059 | 3696 | 30688 | 63696 | 4000 | 30080 | 64000 | 1920  | 38.45  |
| 100000 | .95  | .20 | .80 | 4000 | 32000 | 64000 | .1951 | .8049 | 3746 | 30907 | 63746 | 4000 | 30400 | 64000 | 1600  | 26.51  |
| 100000 | .96  | .20 | .80 | 4000 | 32000 | 64000 | .1961 | .8039 | 3797 | 31127 | 63797 | 4000 | 30720 | 64000 | 1280  | 16.85  |
| 100000 | .97  | .20 | .80 | 4000 | 32000 | 64000 | .1971 | .8029 | 3847 | 31346 | 63847 | 4000 | 31040 | 64000 | 960   | 9.41   |
| 100000 | .98  | .20 | .80 | 4000 | 32000 | 64000 | .1981 | .8019 | 3898 | 31564 | 63898 | 4000 | 31360 | 64000 | 640   | 4.15   |
| 100000 | .99  | .20 | .80 | 4000 | 32000 | 64000 | .1990 | .8010 | 3949 | 31782 | 63949 | 4000 | 31680 | 64000 | 320   | 1.03   |
| 100000 | 1.00 | .20 | .80 | 4000 | 32000 | 64000 | .2000 | .8000 | 4000 | 32000 | 64000 | 4000 | 32000 | 64000 | 0     | .00    |
| 100000 | 1.01 | .20 | .80 | 4000 | 32000 | 64000 | .2010 | .7990 | 4051 | 32217 | 64051 | 4000 | 32320 | 64000 | -320  | 1.02   |
| 100000 | 1.02 | .20 | .80 | 4000 | 32000 | 64000 | .2019 | .7981 | 4103 | 32434 | 64103 | 4000 | 32640 | 64000 | -640  | 4.04   |
| 100000 | 1.03 | .20 | .80 | 4000 | 32000 | 64000 | .2029 | .7971 | 4154 | 32651 | 64154 | 4000 | 32960 | 64000 | -960  | 9.03   |
| 100000 | 1.04 | .20 | .80 | 4000 | 32000 | 64000 | .2038 | .7962 | 4206 | 32867 | 64206 | 4000 | 33280 | 64000 | -1280 | 15.95  |
| 100000 | 1.05 | .20 | .80 | 4000 | 32000 | 64000 | .2047 | .7953 | 4258 | 33083 | 64258 | 4000 | 33600 | 64000 | -1600 | 24.77  |
| 100000 | 1.06 | .20 | .80 | 4000 | 32000 | 64000 | .2057 | .7943 | 4310 | 33299 | 64310 | 4000 | 33920 | 64000 | -1920 | 35.44  |
| 100000 | 1.07 | .20 | .80 | 4000 | 32000 | 64000 | .2066 | .7934 | 4363 | 33514 | 64363 | 4000 | 34240 | 64000 | -2240 | 47.93  |
| 100000 | 1.08 | .20 | .80 | 4000 | 32000 | 64000 | .2075 | .7925 | 4415 | 33729 | 64415 | 4000 | 34560 | 64000 | -2560 | 62.21  |
| 100000 | 1.09 | .20 | .80 | 4000 | 32000 | 64000 | .2084 | .7916 | 4468 | 33944 | 64468 | 4000 | 34880 | 64000 | -2880 | 78.25  |
| 100000 | 1.10 | .20 | .80 | 4000 | 32000 | 64000 | .2093 | .7907 | 4521 | 34158 | 64521 | 4000 | 35200 | 64000 | -3200 | 96.01  |
| 100000 | 1.11 | .20 | .80 | 4000 | 32000 | 64000 | .2102 | .7898 | 4574 | 34372 | 64574 | 4000 | 35520 | 64000 | -3520 | 115.47 |
| 100000 | 1.12 | .20 | .80 | 4000 | 32000 | 64000 | .2111 | .7889 | 4627 | 34586 | 64627 | 4000 | 35840 | 64000 | -3840 | 136.5  |

|        |      |     |     |      |       |       |       |       |      |       |       |      |       |       |       |        |
|--------|------|-----|-----|------|-------|-------|-------|-------|------|-------|-------|------|-------|-------|-------|--------|
|        |      |     |     |      |       |       |       |       |      |       |       |      |       |       | 9     |        |
| 100000 | 1.13 | .20 | .80 | 4000 | 32000 | 64000 | .2120 | .7880 | 4681 | 34799 | 64681 | 4000 | 36160 | 64000 | -4160 | 159.35 |
| 100000 | 1.14 | .20 | .80 | 4000 | 32000 | 64000 | .2129 | .7871 | 4734 | 35012 | 64734 | 4000 | 36480 | 64000 | -4480 | 183.72 |
| 100000 | 1.15 | .20 | .80 | 4000 | 32000 | 64000 | .2137 | .7863 | 4788 | 35224 | 64788 | 4000 | 36800 | 64000 | -4800 | 209.68 |
| 100000 | 1.16 | .20 | .80 | 4000 | 32000 | 64000 | .2146 | .7854 | 4842 | 35437 | 64842 | 4000 | 37120 | 64000 | -5120 | 237.19 |
| 100000 | 1.17 | .20 | .80 | 4000 | 32000 | 64000 | .2155 | .7845 | 4896 | 35649 | 64896 | 4000 | 37440 | 64000 | -5440 | 266.23 |
| 100000 | 1.18 | .20 | .80 | 4000 | 32000 | 64000 | .2163 | .7837 | 4950 | 35860 | 64950 | 4000 | 37760 | 64000 | -5760 | 296.79 |
| 100000 | 1.19 | .20 | .80 | 4000 | 32000 | 64000 | .2172 | .7828 | 5004 | 36072 | 65004 | 4000 | 38080 | 64000 | -6080 | 328.83 |
| 100000 | 1.20 | .20 | .80 | 4000 | 32000 | 64000 | .2180 | .7820 | 5059 | 36283 | 65059 | 4000 | 38400 | 64000 | -6400 | 362.33 |
| 100000 | .80  | .25 | .75 | 6250 | 37500 | 56250 | .2297 | .7703 | 4882 | 32736 | 54882 | 6250 | 30000 | 56250 | 7500  | 646.34 |
| 100000 | .81  | .25 | .75 | 6250 | 37500 | 56250 | .2308 | .7692 | 4948 | 32979 | 54948 | 6250 | 30375 | 56250 | 7125  | 578.85 |
| 100000 | .82  | .25 | .75 | 6250 | 37500 | 56250 | .2319 | .7681 | 5015 | 33220 | 55015 | 6250 | 30750 | 56250 | 6750  | 515.58 |
| 100000 | .83  | .25 | .75 | 6250 | 37500 | 56250 | .2330 | .7670 | 5082 | 33461 | 55082 | 6250 | 31125 | 56250 | 6375  | 456.44 |
| 100000 | .84  | .25 | .75 | 6250 | 37500 | 56250 | .2340 | .7660 | 5149 | 33702 | 55149 | 6250 | 31500 | 56250 | 6000  | 401.33 |
| 100000 | .85  | .25 | .75 | 6250 | 37500 | 56250 | .2351 | .7649 | 5216 | 33942 | 55216 | 6250 | 31875 | 56250 | 5625  | 350.14 |
| 100000 | .86  | .25 | .75 | 6250 | 37500 | 56250 | .2361 | .7639 | 5284 | 34182 | 55284 | 6250 | 32250 | 56250 | 5250  | 302.80 |
| 100000 | .87  | .25 | .75 | 6250 | 37500 | 56250 | .2372 | .7628 | 5352 | 34422 | 55352 | 6250 | 32625 | 56250 | 4875  | 259.22 |
| 100000 | .88  | .25 | .75 | 6250 | 37500 | 56250 | .2382 | .7618 | 5420 | 34661 | 55420 | 6250 | 33000 | 56250 | 4500  | 219.3  |

|        |      |     |     |      |       |       |       |       |      |       |       |      |       |       |       |        |
|--------|------|-----|-----|------|-------|-------|-------|-------|------|-------|-------|------|-------|-------|-------|--------|
|        |      |     |     |      |       |       |       |       |      |       |       |      |       |       |       | 1      |
| 100000 | .89  | .25 | .75 | 6250 | 37500 | 56250 | .2392 | .7608 | 5488 | 34900 | 55488 | 6250 | 33375 | 56250 | 4125  | 182.99 |
| 100000 | .90  | .25 | .75 | 6250 | 37500 | 56250 | .2403 | .7597 | 5556 | 35138 | 55556 | 6250 | 33750 | 56250 | 3750  | 150.18 |
| 100000 | .91  | .25 | .75 | 6250 | 37500 | 56250 | .2413 | .7587 | 5625 | 35376 | 55625 | 6250 | 34125 | 56250 | 3375  | 120.81 |
| 100000 | .92  | .25 | .75 | 6250 | 37500 | 56250 | .2423 | .7577 | 5693 | 35613 | 55693 | 6250 | 34500 | 56250 | 3000  | 94.81  |
| 100000 | .93  | .25 | .75 | 6250 | 37500 | 56250 | .2433 | .7567 | 5762 | 35851 | 55762 | 6250 | 34875 | 56250 | 2625  | 72.10  |
| 100000 | .94  | .25 | .75 | 6250 | 37500 | 56250 | .2442 | .7558 | 5831 | 36087 | 55831 | 6250 | 35250 | 56250 | 2250  | 52.62  |
| 100000 | .95  | .25 | .75 | 6250 | 37500 | 56250 | .2452 | .7548 | 5901 | 36324 | 55901 | 6250 | 35625 | 56250 | 1875  | 36.30  |
| 100000 | .96  | .25 | .75 | 6250 | 37500 | 56250 | .2462 | .7538 | 5970 | 36560 | 55970 | 6250 | 36000 | 56250 | 1500  | 23.08  |
| 100000 | .97  | .25 | .75 | 6250 | 37500 | 56250 | .2472 | .7528 | 6040 | 36795 | 56040 | 6250 | 36375 | 56250 | 1125  | 12.90  |
| 100000 | .98  | .25 | .75 | 6250 | 37500 | 56250 | .2481 | .7519 | 6110 | 37031 | 56110 | 6250 | 36750 | 56250 | 750   | 5.70   |
| 100000 | .99  | .25 | .75 | 6250 | 37500 | 56250 | .2491 | .7509 | 6180 | 37265 | 56180 | 6250 | 37125 | 56250 | 375   | 1.42   |
| 100000 | 1.00 | .25 | .75 | 6250 | 37500 | 56250 | .2500 | .7500 | 6250 | 37500 | 56250 | 6250 | 37500 | 56250 | 0     | .00    |
| 100000 | 1.01 | .25 | .75 | 6250 | 37500 | 56250 | .2509 | .7491 | 6320 | 37734 | 56320 | 6250 | 37875 | 56250 | -375  | 1.40   |
| 100000 | 1.02 | .25 | .75 | 6250 | 37500 | 56250 | .2519 | .7481 | 6391 | 37968 | 56391 | 6250 | 38250 | 56250 | -750  | 5.56   |
| 100000 | 1.03 | .25 | .75 | 6250 | 37500 | 56250 | .2528 | .7472 | 6462 | 38202 | 56462 | 6250 | 38625 | 56250 | -1125 | 12.42  |
| 100000 | 1.04 | .25 | .75 | 6250 | 37500 | 56250 | .2537 | .7463 | 6533 | 38435 | 56533 | 6250 | 39000 | 56250 | -1500 | 21.95  |
| 100000 | 1.05 | .25 | .75 | 6250 | 37500 | 56250 | .2546 | .7454 | 6604 | 38668 | 56604 | 6250 | 39375 | 56250 | -1875 | 34.10  |
| 100000 | 1.06 | .25 | .75 | 6250 | 37500 | 56250 | .2555 | .7445 | 6675 | 38900 | 56675 | 6250 | 39750 | 56250 | -2250 | 48.81  |
| 100000 | 1.07 | .25 | .75 | 6250 | 37500 | 56250 | .2564 | .7436 | 6746 | 39132 | 56746 | 6250 | 40125 | 56250 | -2625 | 66.05  |
| 100000 | 1.08 | .25 | .75 | 6250 | 37500 | 56250 | .2573 | .7427 | 6818 | 39364 | 56818 | 6250 | 40500 | 56250 | -3000 | 85.77  |
| 100000 | 1.09 | .25 | .75 | 6250 | 37500 | 56250 | .2582 | .7418 | 6890 | 39596 | 56890 | 6250 | 40875 | 56250 | -3375 | 107.93 |
| 100000 | 1.10 | .25 | .75 | 6250 | 37500 | 56250 | .2590 | .7410 | 6962 | 39827 | 56962 | 6250 | 41250 | 56250 | -3750 | 132.48 |
| 100000 | 1.11 | .25 | .75 | 6250 | 37500 | 56250 | .2599 | .7401 | 7034 | 40058 | 57034 | 6250 | 41625 | 56250 | -4125 | 159.40 |
| 100000 | 1.12 | .25 | .75 | 6250 | 37500 | 56250 | .2608 | .7392 | 7106 | 40288 | 57106 | 6250 | 42000 | 56250 | -4500 | 188.64 |
| 100000 | 1.13 | .25 | .75 | 6250 | 37500 | 56250 | .2616 | .7384 | 7178 | 40519 | 57178 | 6250 | 42375 | 56250 | -4875 | 220.1  |

|        |      |     |     |      |       |       |       |       |      |       |       |      |       |       |       |        |
|--------|------|-----|-----|------|-------|-------|-------|-------|------|-------|-------|------|-------|-------|-------|--------|
|        |      |     |     |      |       |       |       |       |      |       |       |      |       |       |       | 6      |
| 100000 | 1.14 | .25 | .75 | 6250 | 37500 | 56250 | .2625 | .7375 | 7251 | 40749 | 57251 | 6250 | 42750 | 56250 | -5250 | 253.92 |
| 100000 | 1.15 | .25 | .75 | 6250 | 37500 | 56250 | .2633 | .7367 | 7323 | 40978 | 57323 | 6250 | 43125 | 56250 | -5625 | 289.90 |
| 100000 | 1.16 | .25 | .75 | 6250 | 37500 | 56250 | .2642 | .7358 | 7396 | 41208 | 57396 | 6250 | 43500 | 56250 | -6000 | 328.06 |
| 100000 | 1.17 | .25 | .75 | 6250 | 37500 | 56250 | .2650 | .7350 | 7469 | 41437 | 57469 | 6250 | 43875 | 56250 | -6375 | 368.36 |
| 100000 | 1.18 | .25 | .75 | 6250 | 37500 | 56250 | .2658 | .7342 | 7542 | 41665 | 57542 | 6250 | 44250 | 56250 | -6750 | 410.78 |
| 100000 | 1.19 | .25 | .75 | 6250 | 37500 | 56250 | .2666 | .7334 | 7616 | 41894 | 57616 | 6250 | 44625 | 56250 | -7125 | 455.27 |
| 100000 | 1.20 | .25 | .75 | 6250 | 37500 | 56250 | .2674 | .7326 | 7689 | 42122 | 57689 | 6250 | 45000 | 56250 | -7500 | 501.81 |
| 100000 | .80  | .30 | .70 | 9000 | 42000 | 49000 | .2817 | .7183 | 7267 | 37066 | 47267 | 9000 | 33600 | 49000 | 8400  | 801.10 |
| 100000 | .81  | .30 | .70 | 9000 | 42000 | 49000 | .2827 | .7173 | 7352 | 37316 | 47352 | 9000 | 34020 | 49000 | 7980  | 718.00 |
| 100000 | .82  | .30 | .70 | 9000 | 42000 | 49000 | .2836 | .7164 | 7437 | 37566 | 47437 | 9000 | 34440 | 49000 | 7560  | 640.00 |
| 100000 | .83  | .30 | .70 | 9000 | 42000 | 49000 | .2846 | .7154 | 7523 | 37815 | 47523 | 9000 | 34860 | 49000 | 7140  | 567.00 |
| 100000 | .84  | .30 | .70 | 9000 | 42000 | 49000 | .2856 | .7144 | 7608 | 38064 | 47608 | 9000 | 35280 | 49000 | 6720  | 498.89 |
| 100000 | .85  | .30 | .70 | 9000 | 42000 | 49000 | .2866 | .7134 | 7694 | 38312 | 47694 | 9000 | 35700 | 49000 | 6300  | 435.56 |
| 100000 | .86  | .30 | .70 | 9000 | 42000 | 49000 | .2875 | .7125 | 7780 | 38560 | 47780 | 9000 | 36120 | 49000 | 5880  | 376.93 |
| 100000 | .87  | .30 | .70 | 9000 | 42000 | 49000 | .2884 | .7116 | 7866 | 38808 | 47866 | 9000 | 36540 | 49000 | 5460  | 322.89 |
| 100000 | .88  | .30 | .70 | 9000 | 42000 | 49000 | .2894 | .7106 | 7952 | 39055 | 47952 | 9000 | 36960 | 49000 | 5040  | 273.35 |
| 100000 | .89  | .30 | .70 | 9000 | 42000 | 49000 | .2903 | .7097 | 8039 | 39302 | 48039 | 9000 | 37380 | 49000 | 4620  | 228.2  |

|        |      |     |     |      |       |       |       |       |       |       |       |      |       |       |       |        |
|--------|------|-----|-----|------|-------|-------|-------|-------|-------|-------|-------|------|-------|-------|-------|--------|
|        |      |     |     |      |       |       |       |       |       |       |       |      |       |       |       | 2      |
| 100000 | .90  | .30 | .70 | 9000 | 42000 | 49000 | .2912 | .7088 | 8125  | 39549 | 48125 | 9000 | 37800 | 49000 | 4200  | 187.41 |
| 100000 | .91  | .30 | .70 | 9000 | 42000 | 49000 | .2921 | .7079 | 8212  | 39796 | 48212 | 9000 | 38220 | 49000 | 3780  | 150.85 |
| 100000 | .92  | .30 | .70 | 9000 | 42000 | 49000 | .2930 | .7070 | 8299  | 40042 | 48299 | 9000 | 38640 | 49000 | 3360  | 118.45 |
| 100000 | .93  | .30 | .70 | 9000 | 42000 | 49000 | .2939 | .7061 | 8386  | 40288 | 48386 | 9000 | 39060 | 49000 | 2940  | 90.13  |
| 100000 | .94  | .30 | .70 | 9000 | 42000 | 49000 | .2948 | .7052 | 8473  | 40533 | 48473 | 9000 | 39480 | 49000 | 2520  | 65.81  |
| 100000 | .95  | .30 | .70 | 9000 | 42000 | 49000 | .2957 | .7043 | 8561  | 40778 | 48561 | 9000 | 39900 | 49000 | 2100  | 45.43  |
| 100000 | .96  | .30 | .70 | 9000 | 42000 | 49000 | .2966 | .7034 | 8648  | 41023 | 48648 | 9000 | 40320 | 49000 | 1680  | 28.90  |
| 100000 | .97  | .30 | .70 | 9000 | 42000 | 49000 | .2974 | .7026 | 8736  | 41268 | 48736 | 9000 | 40740 | 49000 | 1260  | 16.16  |
| 100000 | .98  | .30 | .70 | 9000 | 42000 | 49000 | .2983 | .7017 | 8824  | 41512 | 48824 | 9000 | 41160 | 49000 | 840   | 7.14   |
| 100000 | .99  | .30 | .70 | 9000 | 42000 | 49000 | .2992 | .7008 | 8912  | 41756 | 48912 | 9000 | 41580 | 49000 | 420   | 1.77   |
| 100000 | 1.00 | .30 | .70 | 9000 | 42000 | 49000 | .3000 | .7000 | 9000  | 42000 | 49000 | 9000 | 42000 | 49000 | 0     | .00    |
| 100000 | 1.01 | .30 | .70 | 9000 | 42000 | 49000 | .3008 | .6992 | 9088  | 42243 | 49088 | 9000 | 42420 | 49000 | -420  | 1.75   |
| 100000 | 1.02 | .30 | .70 | 9000 | 42000 | 49000 | .3017 | .6983 | 9177  | 42487 | 49177 | 9000 | 42840 | 49000 | -840  | 6.98   |
| 100000 | 1.03 | .30 | .70 | 9000 | 42000 | 49000 | .3025 | .6975 | 9265  | 42730 | 49265 | 9000 | 43260 | 49000 | -1260 | 15.61  |
| 100000 | 1.04 | .30 | .70 | 9000 | 42000 | 49000 | .3033 | .6967 | 9354  | 42972 | 49354 | 9000 | 43680 | 49000 | -1680 | 27.59  |
| 100000 | 1.05 | .30 | .70 | 9000 | 42000 | 49000 | .3041 | .6959 | 9443  | 43215 | 49443 | 9000 | 44100 | 49000 | -2100 | 42.86  |
| 100000 | 1.06 | .30 | .70 | 9000 | 42000 | 49000 | .3049 | .6951 | 9532  | 43457 | 49532 | 9000 | 44520 | 49000 | -2520 | 61.38  |
| 100000 | 1.07 | .30 | .70 | 9000 | 42000 | 49000 | .3057 | .6943 | 9621  | 43698 | 49621 | 9000 | 44940 | 49000 | -2940 | 83.09  |
| 100000 | 1.08 | .30 | .70 | 9000 | 42000 | 49000 | .3065 | .6935 | 9710  | 43940 | 49710 | 9000 | 45360 | 49000 | -3360 | 107.94 |
| 100000 | 1.09 | .30 | .70 | 9000 | 42000 | 49000 | .3073 | .6927 | 9799  | 44181 | 49799 | 9000 | 45780 | 49000 | -3780 | 135.87 |
| 100000 | 1.10 | .30 | .70 | 9000 | 42000 | 49000 | .3081 | .6919 | 9889  | 44422 | 49889 | 9000 | 46200 | 49000 | -4200 | 166.84 |
| 100000 | 1.11 | .30 | .70 | 9000 | 42000 | 49000 | .3088 | .6912 | 9978  | 44663 | 49978 | 9000 | 46620 | 49000 | -4620 | 200.80 |
| 100000 | 1.12 | .30 | .70 | 9000 | 42000 | 49000 | .3096 | .6904 | 10068 | 44904 | 50068 | 9000 | 47040 | 49000 | -5040 | 237.71 |
| 100000 | 1.13 | .30 | .70 | 9000 | 42000 | 49000 | .3104 | .6896 | 10158 | 45144 | 50158 | 9000 | 47460 | 49000 | -5460 | 277.5  |

|        |      |     |     |       |       |       |       |       |       |       |       |       |       |       |       |        |
|--------|------|-----|-----|-------|-------|-------|-------|-------|-------|-------|-------|-------|-------|-------|-------|--------|
|        |      |     |     |       |       |       |       |       |       |       |       |       |       |       |       | 2      |
| 100000 | 1.14 | .30 | .70 | 9000  | 42000 | 49000 | .3111 | .6889 | 10248 | 45384 | 50248 | 9000  | 47880 | 49000 | -5880 | 320.18 |
| 100000 | 1.15 | .30 | .70 | 9000  | 42000 | 49000 | .3119 | .6881 | 10338 | 45624 | 50338 | 9000  | 48300 | 49000 | -6300 | 365.66 |
| 100000 | 1.16 | .30 | .70 | 9000  | 42000 | 49000 | .3126 | .6874 | 10428 | 45864 | 50428 | 9000  | 48720 | 49000 | -6720 | 413.90 |
| 100000 | 1.17 | .30 | .70 | 9000  | 42000 | 49000 | .3133 | .6867 | 10518 | 46103 | 50518 | 9000  | 49140 | 49000 | -7140 | 464.88 |
| 100000 | 1.18 | .30 | .70 | 9000  | 42000 | 49000 | .3141 | .6859 | 10609 | 46342 | 50609 | 9000  | 49560 | 49000 | -7560 | 518.55 |
| 100000 | 1.19 | .30 | .70 | 9000  | 42000 | 49000 | .3148 | .6852 | 10699 | 46581 | 50699 | 9000  | 49980 | 49000 | -7980 | 574.87 |
| 100000 | 1.20 | .30 | .70 | 9000  | 42000 | 49000 | .3155 | .6845 | 10790 | 46820 | 50790 | 9000  | 50400 | 49000 | -8400 | 633.80 |
| 100000 | .80  | .35 | .65 | 12250 | 45500 | 42250 | .3350 | .6650 | 10200 | 40500 | 40200 | 12250 | 36400 | 42250 | 9100  | 931.38 |
| 100000 | .81  | .35 | .65 | 12250 | 45500 | 42250 | .3358 | .6642 | 10302 | 40752 | 40302 | 12250 | 36855 | 42250 | 8645  | 835.27 |
| 100000 | .82  | .35 | .65 | 12250 | 45500 | 42250 | .3366 | .6634 | 10403 | 41004 | 40403 | 12250 | 37310 | 42250 | 8190  | 744.97 |
| 100000 | .83  | .35 | .65 | 12250 | 45500 | 42250 | .3374 | .6626 | 10505 | 41255 | 40505 | 12250 | 37765 | 42250 | 7735  | 660.37 |
| 100000 | .84  | .35 | .65 | 12250 | 45500 | 42250 | .3382 | .6618 | 10607 | 41507 | 40607 | 12250 | 38220 | 42250 | 7280  | 581.37 |
| 100000 | .85  | .35 | .65 | 12250 | 45500 | 42250 | .3390 | .6610 | 10709 | 41758 | 40709 | 12250 | 38675 | 42250 | 6825  | 507.85 |
| 100000 | .86  | .35 | .65 | 12250 | 45500 | 42250 | .3398 | .6602 | 10811 | 42009 | 40811 | 12250 | 39130 | 42250 | 6370  | 439.71 |
| 100000 | .87  | .35 | .65 | 12250 | 45500 | 42250 | .3406 | .6594 | 10913 | 42260 | 40913 | 12250 | 39585 | 42250 | 5915  | 376.86 |
| 100000 | .88  | .35 | .65 | 12250 | 45500 | 42250 | .3413 | .6587 | 11015 | 42510 | 41015 | 12250 | 40040 | 42250 | 5460  | 319.20 |
| 100000 | .89  | .35 | .65 | 12250 | 45500 | 42250 | .3421 | .6579 | 11117 | 42760 | 41117 | 12250 | 40495 | 42250 | 5005  | 266.6  |

|        |      |     |     |       |       |       |       |       |       |       |       |       |       |       |       |        |
|--------|------|-----|-----|-------|-------|-------|-------|-------|-------|-------|-------|-------|-------|-------|-------|--------|
|        |      |     |     |       |       |       |       |       |       |       |       |       |       |       |       | 3      |
| 100000 | .90  | .35 | .65 | 12250 | 45500 | 42250 | .3428 | .6572 | 11220 | 43010 | 41220 | 12250 | 40950 | 42250 | 4550  | 219.06 |
| 100000 | .91  | .35 | .65 | 12250 | 45500 | 42250 | .3436 | .6564 | 11322 | 43260 | 41322 | 12250 | 41405 | 42250 | 4095  | 176.41 |
| 100000 | .92  | .35 | .65 | 12250 | 45500 | 42250 | .3443 | .6557 | 11425 | 43510 | 41425 | 12250 | 41860 | 42250 | 3640  | 138.58 |
| 100000 | .93  | .35 | .65 | 12250 | 45500 | 42250 | .3451 | .6549 | 11528 | 43759 | 41528 | 12250 | 42315 | 42250 | 3185  | 105.49 |
| 100000 | .94  | .35 | .65 | 12250 | 45500 | 42250 | .3458 | .6542 | 11631 | 44009 | 41631 | 12250 | 42770 | 42250 | 2730  | 77.06  |
| 100000 | .95  | .35 | .65 | 12250 | 45500 | 42250 | .3465 | .6535 | 11734 | 44258 | 41734 | 12250 | 43225 | 42250 | 2275  | 53.21  |
| 100000 | .96  | .35 | .65 | 12250 | 45500 | 42250 | .3472 | .6528 | 11837 | 44507 | 41837 | 12250 | 43680 | 42250 | 1820  | 33.86  |
| 100000 | .97  | .35 | .65 | 12250 | 45500 | 42250 | .3479 | .6521 | 11940 | 44755 | 41940 | 12250 | 44135 | 42250 | 1365  | 18.94  |
| 100000 | .98  | .35 | .65 | 12250 | 45500 | 42250 | .3486 | .6514 | 12043 | 45004 | 42043 | 12250 | 44590 | 42250 | 910   | 8.37   |
| 100000 | .99  | .35 | .65 | 12250 | 45500 | 42250 | .3493 | .6507 | 12147 | 45252 | 42147 | 12250 | 45045 | 42250 | 455   | 2.08   |
| 100000 | 1.00 | .35 | .65 | 12250 | 45500 | 42250 | .3500 | .6500 | 12250 | 45500 | 42250 | 12250 | 45500 | 42250 | 0     | .00    |
| 100000 | 1.01 | .35 | .65 | 12250 | 45500 | 42250 | .3507 | .6493 | 12354 | 45748 | 42354 | 12250 | 45955 | 42250 | -455  | 2.06   |
| 100000 | 1.02 | .35 | .65 | 12250 | 45500 | 42250 | .3514 | .6486 | 12457 | 45996 | 42457 | 12250 | 46410 | 42250 | -910  | 8.19   |
| 100000 | 1.03 | .35 | .65 | 12250 | 45500 | 42250 | .3520 | .6480 | 12561 | 46243 | 42561 | 12250 | 46865 | 42250 | -1365 | 18.33  |
| 100000 | 1.04 | .35 | .65 | 12250 | 45500 | 42250 | .3527 | .6473 | 12665 | 46490 | 42665 | 12250 | 47320 | 42250 | -1820 | 32.42  |
| 100000 | 1.05 | .35 | .65 | 12250 | 45500 | 42250 | .3533 | .6467 | 12769 | 46738 | 42769 | 12250 | 47775 | 42250 | -2275 | 50.39  |
| 100000 | 1.06 | .35 | .65 | 12250 | 45500 | 42250 | .3540 | .6460 | 12873 | 46985 | 42873 | 12250 | 48230 | 42250 | -2730 | 72.18  |
| 100000 | 1.07 | .35 | .65 | 12250 | 45500 | 42250 | .3546 | .6454 | 12977 | 47231 | 42977 | 12250 | 48685 | 42250 | -3185 | 97.73  |
| 100000 | 1.08 | .35 | .65 | 12250 | 45500 | 42250 | .3553 | .6447 | 13081 | 47478 | 43081 | 12250 | 49140 | 42250 | -3640 | 126.99 |
| 100000 | 1.09 | .35 | .65 | 12250 | 45500 | 42250 | .3559 | .6441 | 13185 | 47725 | 43185 | 12250 | 49595 | 42250 | -4095 | 159.90 |
| 100000 | 1.10 | .35 | .65 | 12250 | 45500 | 42250 | .3565 | .6435 | 13290 | 47971 | 43290 | 12250 | 50050 | 42250 | -4550 | 196.40 |
| 100000 | 1.11 | .35 | .65 | 12250 | 45500 | 42250 | .3571 | .6429 | 13394 | 48217 | 43394 | 12250 | 50505 | 42250 | -5005 | 236.44 |
| 100000 | 1.12 | .35 | .65 | 12250 | 45500 | 42250 | .3578 | .6422 | 13499 | 48463 | 43499 | 12250 | 50960 | 42250 | -5460 | 279.97 |

|        |      |     |     |       |       |       |       |       |       |       |       |       |       |       |       |             |
|--------|------|-----|-----|-------|-------|-------|-------|-------|-------|-------|-------|-------|-------|-------|-------|-------------|
| 100000 | 1.13 | .35 | .65 | 12250 | 45500 | 42250 | .3584 | .6416 | 13603 | 48709 | 43603 | 12250 | 51415 | 42250 | -5915 | 326.9<br>3  |
| 100000 | 1.14 | .35 | .65 | 12250 | 45500 | 42250 | .3590 | .6410 | 13708 | 48954 | 43708 | 12250 | 51870 | 42250 | -6370 | 377.2<br>8  |
| 100000 | 1.15 | .35 | .65 | 12250 | 45500 | 42250 | .3596 | .6404 | 13812 | 49200 | 43812 | 12250 | 52325 | 42250 | -6825 | 430.9<br>6  |
| 100000 | 1.16 | .35 | .65 | 12250 | 45500 | 42250 | .3602 | .6398 | 13917 | 49445 | 43917 | 12250 | 52780 | 42250 | -7280 | 487.9<br>4  |
| 100000 | 1.17 | .35 | .65 | 12250 | 45500 | 42250 | .3608 | .6392 | 14022 | 49691 | 44022 | 12250 | 53235 | 42250 | -7735 | 548.1<br>5  |
| 100000 | 1.18 | .35 | .65 | 12250 | 45500 | 42250 | .3614 | .6386 | 14127 | 49936 | 44127 | 12250 | 53690 | 42250 | -8190 | 611.5<br>5  |
| 100000 | 1.19 | .35 | .65 | 12250 | 45500 | 42250 | .3619 | .6381 | 14232 | 50181 | 44232 | 12250 | 54145 | 42250 | -8645 | 678.1<br>1  |
| 100000 | 1.20 | .35 | .65 | 12250 | 45500 | 42250 | .3625 | .6375 | 14337 | 50425 | 44337 | 12250 | 54600 | 42250 | -9100 | 747.7<br>7  |
| 100000 | .80  | .40 | .60 | 16000 | 48000 | 36000 | .3894 | .6106 | 13706 | 42988 | 33706 | 16000 | 38400 | 36000 | 9600  | 1029.<br>57 |
| 100000 | .81  | .40 | .60 | 16000 | 48000 | 36000 | .3900 | .6100 | 13820 | 43239 | 33820 | 16000 | 38880 | 36000 | 9120  | 923.7<br>3  |
| 100000 | .82  | .40 | .60 | 16000 | 48000 | 36000 | .3905 | .6095 | 13935 | 43491 | 33935 | 16000 | 39360 | 36000 | 8640  | 824.2<br>2  |
| 100000 | .83  | .40 | .60 | 16000 | 48000 | 36000 | .3911 | .6089 | 14049 | 43742 | 34049 | 16000 | 39840 | 36000 | 8160  | 730.9<br>2  |
| 100000 | .84  | .40 | .60 | 16000 | 48000 | 36000 | .3917 | .6083 | 14163 | 43994 | 34163 | 16000 | 40320 | 36000 | 7680  | 643.7<br>3  |
| 100000 | .85  | .40 | .60 | 16000 | 48000 | 36000 | .3922 | .6078 | 14278 | 44245 | 34278 | 16000 | 40800 | 36000 | 7200  | 562.5<br>5  |
| 100000 | .86  | .40 | .60 | 16000 | 48000 | 36000 | .3928 | .6072 | 14392 | 44496 | 34392 | 16000 | 41280 | 36000 | 6720  | 487.2<br>6  |
| 100000 | .87  | .40 | .60 | 16000 | 48000 | 36000 | .3933 | .6067 | 14507 | 44747 | 34507 | 16000 | 41760 | 36000 | 6240  | 417.7<br>6  |
| 100000 | .88  | .40 | .60 | 16000 | 48000 | 36000 | .3939 | .6061 | 14621 | 44998 | 34621 | 16000 | 42240 | 36000 | 5760  | 353.9<br>7  |



|        |      |     |     |       |       |       |       |       |       |       |       |       |       |       |       |        |
|--------|------|-----|-----|-------|-------|-------|-------|-------|-------|-------|-------|-------|-------|-------|-------|--------|
| 100000 | .89  | .40 | .60 | 16000 | 48000 | 36000 | .3944 | .6056 | 14736 | 45249 | 34736 | 16000 | 42720 | 36000 | 5280  | 295.78 |
| 100000 | .90  | .40 | .60 | 16000 | 48000 | 36000 | .3950 | .6050 | 14850 | 45499 | 34850 | 16000 | 43200 | 36000 | 4800  | 243.09 |
| 100000 | .91  | .40 | .60 | 16000 | 48000 | 36000 | .3955 | .6045 | 14965 | 45750 | 34965 | 16000 | 43680 | 36000 | 4320  | 195.82 |
| 100000 | .92  | .40 | .60 | 16000 | 48000 | 36000 | .3960 | .6040 | 15080 | 46000 | 35080 | 16000 | 44160 | 36000 | 3840  | 153.88 |
| 100000 | .93  | .40 | .60 | 16000 | 48000 | 36000 | .3965 | .6035 | 15195 | 46250 | 35195 | 16000 | 44640 | 36000 | 3360  | 117.17 |
| 100000 | .94  | .40 | .60 | 16000 | 48000 | 36000 | .3970 | .6030 | 15310 | 46501 | 35310 | 16000 | 45120 | 36000 | 2880  | 85.62  |
| 100000 | .95  | .40 | .60 | 16000 | 48000 | 36000 | .3975 | .6025 | 15425 | 46751 | 35425 | 16000 | 45600 | 36000 | 2400  | 59.14  |
| 100000 | .96  | .40 | .60 | 16000 | 48000 | 36000 | .3980 | .6020 | 15540 | 47001 | 35540 | 16000 | 46080 | 36000 | 1920  | 37.65  |
| 100000 | .97  | .40 | .60 | 16000 | 48000 | 36000 | .3985 | .6015 | 15655 | 47251 | 35655 | 16000 | 46560 | 36000 | 1440  | 21.06  |
| 100000 | .98  | .40 | .60 | 16000 | 48000 | 36000 | .3990 | .6010 | 15770 | 47501 | 35770 | 16000 | 47040 | 36000 | 960   | 9.31   |
| 100000 | .99  | .40 | .60 | 16000 | 48000 | 36000 | .3995 | .6005 | 15885 | 47750 | 35885 | 16000 | 47520 | 36000 | 480   | 2.32   |
| 100000 | 1.00 | .40 | .60 | 16000 | 48000 | 36000 | .4000 | .6000 | 16000 | 48000 | 36000 | 16000 | 48000 | 36000 | 0     | .00    |
| 100000 | 1.01 | .40 | .60 | 16000 | 48000 | 36000 | .4005 | .5995 | 16115 | 48250 | 36115 | 16000 | 48480 | 36000 | -480  | 2.29   |
| 100000 | 1.02 | .40 | .60 | 16000 | 48000 | 36000 | .4010 | .5990 | 16230 | 48499 | 36230 | 16000 | 48960 | 36000 | -960  | 9.12   |
| 100000 | 1.03 | .40 | .60 | 16000 | 48000 | 36000 | .4014 | .5986 | 16346 | 48748 | 36346 | 16000 | 49440 | 36000 | -1440 | 20.42  |
| 100000 | 1.04 | .40 | .60 | 16000 | 48000 | 36000 | .4019 | .5981 | 16461 | 48998 | 36461 | 16000 | 49920 | 36000 | -1920 | 36.11  |
| 100000 | 1.05 | .40 | .60 | 16000 | 48000 | 36000 | .4023 | .5977 | 16577 | 49247 | 36577 | 16000 | 50400 | 36000 | -2400 | 56.14  |
| 100000 | 1.06 | .40 | .60 | 16000 | 48000 | 36000 | .4028 | .5972 | 16692 | 49496 | 36692 | 16000 | 50880 | 36000 | -2880 | 80.44  |
| 100000 | 1.07 | .40 | .60 | 16000 | 48000 | 36000 | .4033 | .5967 | 16807 | 49745 | 36807 | 16000 | 51360 | 36000 | -3360 | 108.94 |
| 100000 | 1.08 | .40 | .60 | 16000 | 48000 | 36000 | .4037 | .5963 | 16923 | 49994 | 36923 | 16000 | 51840 | 36000 | -3840 | 141.58 |
| 100000 | 1.09 | .40 | .60 | 16000 | 48000 | 36000 | .4041 | .5959 | 17039 | 50243 | 37039 | 16000 | 52320 | 36000 | -4320 | 178.31 |
| 100000 | 1.10 | .40 | .60 | 16000 | 48000 | 36000 | .4046 | .5954 | 17154 | 50492 | 37154 | 16000 | 52800 | 36000 | -4800 | 219.05 |
| 100000 | 1.11 | .40 | .60 | 16000 | 48000 | 36000 | .4050 | .5950 | 17270 | 50740 | 37270 | 16000 | 53280 | 36000 | -5280 | 263.76 |
| 100000 | 1.12 | .40 | .60 | 16000 | 48000 | 36000 | .4054 | .5946 | 17386 | 50989 | 37386 | 16000 | 53760 | 36000 | -5760 | 312.3  |

|        |      |     |     |       |       |       |       |       |       |       |       |       |       |       |       |         |
|--------|------|-----|-----|-------|-------|-------|-------|-------|-------|-------|-------|-------|-------|-------|-------|---------|
|        |      |     |     |       |       |       |       |       |       |       |       |       |       |       |       | 7       |
| 100000 | 1.13 | .40 | .60 | 16000 | 48000 | 36000 | .4059 | .5941 | 17501 | 51237 | 37501 | 16000 | 54240 | 36000 | -6240 | 364.83  |
| 100000 | 1.14 | .40 | .60 | 16000 | 48000 | 36000 | .4063 | .5937 | 17617 | 51486 | 37617 | 16000 | 54720 | 36000 | -6720 | 421.08  |
| 100000 | 1.15 | .40 | .60 | 16000 | 48000 | 36000 | .4067 | .5933 | 17733 | 51734 | 37733 | 16000 | 55200 | 36000 | -7200 | 481.07  |
| 100000 | 1.16 | .40 | .60 | 16000 | 48000 | 36000 | .4071 | .5929 | 17849 | 51983 | 37849 | 16000 | 55680 | 36000 | -7680 | 544.75  |
| 100000 | 1.17 | .40 | .60 | 16000 | 48000 | 36000 | .4075 | .5925 | 17965 | 52231 | 37965 | 16000 | 56160 | 36000 | -8160 | 612.07  |
| 100000 | 1.18 | .40 | .60 | 16000 | 48000 | 36000 | .4080 | .5920 | 18080 | 52479 | 38080 | 16000 | 56640 | 36000 | -8640 | 682.97  |
| 100000 | 1.19 | .40 | .60 | 16000 | 48000 | 36000 | .4084 | .5916 | 18196 | 52727 | 38196 | 16000 | 57120 | 36000 | -9120 | 757.40  |
| 100000 | 1.20 | .40 | .60 | 16000 | 48000 | 36000 | .4088 | .5912 | 18312 | 52975 | 38312 | 16000 | 57600 | 36000 | -9600 | 835.32  |
| 100000 | .80  | .45 | .55 | 20250 | 49500 | 30250 | .4445 | .5555 | 17802 | 44495 | 27802 | 20250 | 39600 | 30250 | 9900  | 1090.48 |
| 100000 | .81  | .45 | .55 | 20250 | 49500 | 30250 | .4448 | .5552 | 17925 | 44746 | 27925 | 20250 | 40095 | 30250 | 9405  | 978.63  |
| 100000 | .82  | .45 | .55 | 20250 | 49500 | 30250 | .4451 | .5549 | 18047 | 44996 | 28047 | 20250 | 40590 | 30250 | 8910  | 873.43  |
| 100000 | .83  | .45 | .55 | 20250 | 49500 | 30250 | .4454 | .5546 | 18169 | 45247 | 28169 | 20250 | 41085 | 30250 | 8415  | 774.76  |
| 100000 | .84  | .45 | .55 | 20250 | 49500 | 30250 | .4457 | .5543 | 18292 | 45497 | 28292 | 20250 | 41580 | 30250 | 7920  | 682.50  |
| 100000 | .85  | .45 | .55 | 20250 | 49500 | 30250 | .4460 | .5540 | 18414 | 45747 | 28414 | 20250 | 42075 | 30250 | 7425  | 596.57  |
| 100000 | .86  | .45 | .55 | 20250 | 49500 | 30250 | .4463 | .5537 | 18536 | 45998 | 28536 | 20250 | 42570 | 30250 | 6930  | 516.84  |
| 100000 | .87  | .45 | .55 | 20250 | 49500 | 30250 | .4466 | .5534 | 18658 | 46248 | 28658 | 20250 | 43065 | 30250 | 6435  | 443.23  |
| 100000 | .88  | .45 | .55 | 20250 | 49500 | 30250 | .4468 | .5532 | 18781 | 46498 | 28781 | 20250 | 43560 | 30250 | 5940  | 375.6   |

|        |      |     |     |       |       |       |       |       |       |       |       |       |       |       |       |        |
|--------|------|-----|-----|-------|-------|-------|-------|-------|-------|-------|-------|-------|-------|-------|-------|--------|
|        |      |     |     |       |       |       |       |       |       |       |       |       |       |       |       | 3      |
| 100000 | .89  | .45 | .55 | 20250 | 49500 | 30250 | .4471 | .5529 | 18903 | 46749 | 28903 | 20250 | 44055 | 30250 | 5445  | 313.94 |
| 100000 | .90  | .45 | .55 | 20250 | 49500 | 30250 | .4474 | .5526 | 19026 | 46999 | 29026 | 20250 | 44550 | 30250 | 4950  | 258.07 |
| 100000 | .91  | .45 | .55 | 20250 | 49500 | 30250 | .4477 | .5523 | 19148 | 47249 | 29148 | 20250 | 45045 | 30250 | 4455  | 207.93 |
| 100000 | .92  | .45 | .55 | 20250 | 49500 | 30250 | .4479 | .5521 | 19270 | 47499 | 29270 | 20250 | 45540 | 30250 | 3960  | 163.42 |
| 100000 | .93  | .45 | .55 | 20250 | 49500 | 30250 | .4482 | .5518 | 19393 | 47750 | 29393 | 20250 | 46035 | 30250 | 3465  | 124.47 |
| 100000 | .94  | .45 | .55 | 20250 | 49500 | 30250 | .4485 | .5515 | 19515 | 48000 | 29515 | 20250 | 46530 | 30250 | 2970  | 90.97  |
| 100000 | .95  | .45 | .55 | 20250 | 49500 | 30250 | .4487 | .5513 | 19638 | 48250 | 29638 | 20250 | 47025 | 30250 | 2475  | 62.84  |
| 100000 | .96  | .45 | .55 | 20250 | 49500 | 30250 | .4490 | .5510 | 19760 | 48500 | 29760 | 20250 | 47520 | 30250 | 1980  | 40.01  |
| 100000 | .97  | .45 | .55 | 20250 | 49500 | 30250 | .4492 | .5508 | 19883 | 48750 | 29883 | 20250 | 48015 | 30250 | 1485  | 22.39  |
| 100000 | .98  | .45 | .55 | 20250 | 49500 | 30250 | .4495 | .5505 | 20005 | 49000 | 30005 | 20250 | 48510 | 30250 | 990   | 9.90   |
| 100000 | .99  | .45 | .55 | 20250 | 49500 | 30250 | .4498 | .5502 | 20127 | 49250 | 30127 | 20250 | 49005 | 30250 | 495   | 2.46   |
| 100000 | 1.00 | .45 | .55 | 20250 | 49500 | 30250 | .4500 | .5500 | 20250 | 49500 | 30250 | 20250 | 49500 | 30250 | 0     | .00    |
| 100000 | 1.01 | .45 | .55 | 20250 | 49500 | 30250 | .4502 | .5498 | 20373 | 49750 | 30373 | 20250 | 49995 | 30250 | -495  | 2.44   |
| 100000 | 1.02 | .45 | .55 | 20250 | 49500 | 30250 | .4505 | .5495 | 20495 | 50000 | 30495 | 20250 | 50490 | 30250 | -990  | 9.70   |
| 100000 | 1.03 | .45 | .55 | 20250 | 49500 | 30250 | .4507 | .5493 | 20618 | 50250 | 30618 | 20250 | 50985 | 30250 | -1485 | 21.72  |
| 100000 | 1.04 | .45 | .55 | 20250 | 49500 | 30250 | .4510 | .5490 | 20740 | 50500 | 30740 | 20250 | 51480 | 30250 | -1980 | 38.43  |
| 100000 | 1.05 | .45 | .55 | 20250 | 49500 | 30250 | .4512 | .5488 | 20863 | 50750 | 30863 | 20250 | 51975 | 30250 | -2475 | 59.75  |
| 100000 | 1.06 | .45 | .55 | 20250 | 49500 | 30250 | .4514 | .5486 | 20985 | 50999 | 30985 | 20250 | 52470 | 30250 | -2970 | 85.62  |
| 100000 | 1.07 | .45 | .55 | 20250 | 49500 | 30250 | .4517 | .5483 | 21108 | 51249 | 31108 | 20250 | 52965 | 30250 | -3465 | 115.97 |
| 100000 | 1.08 | .45 | .55 | 20250 | 49500 | 30250 | .4519 | .5481 | 21230 | 51499 | 31230 | 20250 | 53460 | 30250 | -3960 | 150.73 |
| 100000 | 1.09 | .45 | .55 | 20250 | 49500 | 30250 | .4521 | .5479 | 21353 | 51749 | 31353 | 20250 | 53955 | 30250 | -4455 | 189.85 |
| 100000 | 1.10 | .45 | .55 | 20250 | 49500 | 30250 | .4524 | .5476 | 21476 | 51999 | 31476 | 20250 | 54450 | 30250 | -4950 | 233.26 |
| 100000 | 1.11 | .45 | .55 | 20250 | 49500 | 30250 | .4526 | .5474 | 21598 | 52248 | 31598 | 20250 | 54945 | 30250 | -5445 | 280.89 |

|        |      |     |     |       |       |       |       |       |       |       |       |       |       |       |       |         |
|--------|------|-----|-----|-------|-------|-------|-------|-------|-------|-------|-------|-------|-------|-------|-------|---------|
| 100000 | 1.12 | .45 | .55 | 20250 | 49500 | 30250 | .4528 | .5472 | 21721 | 52498 | 31721 | 20250 | 55440 | 30250 | -5940 | 332.70  |
| 100000 | 1.13 | .45 | .55 | 20250 | 49500 | 30250 | .4530 | .5470 | 21844 | 52748 | 31844 | 20250 | 55935 | 30250 | -6435 | 388.61  |
| 100000 | 1.14 | .45 | .55 | 20250 | 49500 | 30250 | .4532 | .5468 | 21966 | 52997 | 31966 | 20250 | 56430 | 30250 | -6930 | 448.58  |
| 100000 | 1.15 | .45 | .55 | 20250 | 49500 | 30250 | .4535 | .5465 | 22089 | 53247 | 32089 | 20250 | 56925 | 30250 | -7425 | 512.54  |
| 100000 | 1.16 | .45 | .55 | 20250 | 49500 | 30250 | .4537 | .5463 | 22212 | 53497 | 32212 | 20250 | 57420 | 30250 | -7920 | 580.43  |
| 100000 | 1.17 | .45 | .55 | 20250 | 49500 | 30250 | .4539 | .5461 | 22334 | 53746 | 32334 | 20250 | 57915 | 30250 | -8415 | 652.22  |
| 100000 | 1.18 | .45 | .55 | 20250 | 49500 | 30250 | .4541 | .5459 | 22457 | 53996 | 32457 | 20250 | 58410 | 30250 | -8910 | 727.83  |
| 100000 | 1.19 | .45 | .55 | 20250 | 49500 | 30250 | .4543 | .5457 | 22580 | 54245 | 32580 | 20250 | 58905 | 30250 | -9405 | 807.22  |
| 100000 | 1.20 | .45 | .55 | 20250 | 49500 | 30250 | .4545 | .5455 | 22702 | 54495 | 32702 | 20250 | 59400 | 30250 | -9900 | 890.34  |
| 100000 | .80  | .50 | .50 | 25000 | 50000 | 25000 | .5000 | .5000 | 22500 | 45000 | 22500 | 25000 | 40000 | 25000 | 10000 | 1111.11 |
| 100000 | .81  | .50 | .50 | 25000 | 50000 | 25000 | .5000 | .5000 | 22625 | 45250 | 22625 | 25000 | 40500 | 25000 | 9500  | 997.24  |
| 100000 | .82  | .50 | .50 | 25000 | 50000 | 25000 | .5000 | .5000 | 22750 | 45500 | 22750 | 25000 | 41000 | 25000 | 9000  | 890.11  |
| 100000 | .83  | .50 | .50 | 25000 | 50000 | 25000 | .5000 | .5000 | 22875 | 45750 | 22875 | 25000 | 41500 | 25000 | 8500  | 789.62  |
| 100000 | .84  | .50 | .50 | 25000 | 50000 | 25000 | .5000 | .5000 | 23000 | 46000 | 23000 | 25000 | 42000 | 25000 | 8000  | 695.65  |
| 100000 | .85  | .50 | .50 | 25000 | 50000 | 25000 | .5000 | .5000 | 23125 | 46250 | 23125 | 25000 | 42500 | 25000 | 7500  | 608.11  |
| 100000 | .86  | .50 | .50 | 25000 | 50000 | 25000 | .5000 | .5000 | 23250 | 46500 | 23250 | 25000 | 43000 | 25000 | 7000  | 526.88  |
| 100000 | .87  | .50 | .50 | 25000 | 50000 | 25000 | .5000 | .5000 | 23375 | 46750 | 23375 | 25000 | 43500 | 25000 | 6500  | 451.87  |

|        |      |     |     |       |       |       |       |       |       |       |       |       |       |       |       |        |
|--------|------|-----|-----|-------|-------|-------|-------|-------|-------|-------|-------|-------|-------|-------|-------|--------|
| 100000 | .88  | .50 | .50 | 25000 | 50000 | 25000 | .5000 | .5000 | 23500 | 47000 | 23500 | 25000 | 44000 | 25000 | 6000  | 382.98 |
| 100000 | .89  | .50 | .50 | 25000 | 50000 | 25000 | .5000 | .5000 | 23625 | 47250 | 23625 | 25000 | 44500 | 25000 | 5500  | 320.11 |
| 100000 | .90  | .50 | .50 | 25000 | 50000 | 25000 | .5000 | .5000 | 23750 | 47500 | 23750 | 25000 | 45000 | 25000 | 5000  | 263.16 |
| 100000 | .91  | .50 | .50 | 25000 | 50000 | 25000 | .5000 | .5000 | 23875 | 47750 | 23875 | 25000 | 45500 | 25000 | 4500  | 212.04 |
| 100000 | .92  | .50 | .50 | 25000 | 50000 | 25000 | .5000 | .5000 | 24000 | 48000 | 24000 | 25000 | 46000 | 25000 | 4000  | 166.67 |
| 100000 | .93  | .50 | .50 | 25000 | 50000 | 25000 | .5000 | .5000 | 24125 | 48250 | 24125 | 25000 | 46500 | 25000 | 3500  | 126.94 |
| 100000 | .94  | .50 | .50 | 25000 | 50000 | 25000 | .5000 | .5000 | 24250 | 48500 | 24250 | 25000 | 47000 | 25000 | 3000  | 92.78  |
| 100000 | .95  | .50 | .50 | 25000 | 50000 | 25000 | .5000 | .5000 | 24375 | 48750 | 24375 | 25000 | 47500 | 25000 | 2500  | 64.10  |
| 100000 | .96  | .50 | .50 | 25000 | 50000 | 25000 | .5000 | .5000 | 24500 | 49000 | 24500 | 25000 | 48000 | 25000 | 2000  | 40.82  |
| 100000 | .97  | .50 | .50 | 25000 | 50000 | 25000 | .5000 | .5000 | 24625 | 49250 | 24625 | 25000 | 48500 | 25000 | 1500  | 22.84  |
| 100000 | .98  | .50 | .50 | 25000 | 50000 | 25000 | .5000 | .5000 | 24750 | 49500 | 24750 | 25000 | 49000 | 25000 | 1000  | 10.10  |
| 100000 | .99  | .50 | .50 | 25000 | 50000 | 25000 | .5000 | .5000 | 24875 | 49750 | 24875 | 25000 | 49500 | 25000 | 500   | 2.51   |
| 100000 | 1.00 | .50 | .50 | 25000 | 50000 | 25000 | .5000 | .5000 | 25000 | 50000 | 25000 | 25000 | 50000 | 25000 | 0     | .00    |
| 100000 | 1.01 | .50 | .50 | 25000 | 50000 | 25000 | .5000 | .5000 | 25125 | 50250 | 25125 | 25000 | 50500 | 25000 | -500  | 2.49   |
| 100000 | 1.02 | .50 | .50 | 25000 | 50000 | 25000 | .5000 | .5000 | 25250 | 50500 | 25250 | 25000 | 51000 | 25000 | -1000 | 9.90   |
| 100000 | 1.03 | .50 | .50 | 25000 | 50000 | 25000 | .5000 | .5000 | 25375 | 50750 | 25375 | 25000 | 51500 | 25000 | -1500 | 22.17  |
| 100000 | 1.04 | .50 | .50 | 25000 | 50000 | 25000 | .5000 | .5000 | 25500 | 51000 | 25500 | 25000 | 52000 | 25000 | -2000 | 39.22  |
| 100000 | 1.05 | .50 | .50 | 25000 | 50000 | 25000 | .5000 | .5000 | 25625 | 51250 | 25625 | 25000 | 52500 | 25000 | -2500 | 60.98  |
| 100000 | 1.06 | .50 | .50 | 25000 | 50000 | 25000 | .5000 | .5000 | 25750 | 51500 | 25750 | 25000 | 53000 | 25000 | -3000 | 87.38  |
| 100000 | 1.07 | .50 | .50 | 25000 | 50000 | 25000 | .5000 | .5000 | 25875 | 51750 | 25875 | 25000 | 53500 | 25000 | -3500 | 118.36 |
| 100000 | 1.08 | .50 | .50 | 25000 | 50000 | 25000 | .5000 | .5000 | 26000 | 52000 | 26000 | 25000 | 54000 | 25000 | -4000 | 153.85 |
| 100000 | 1.09 | .50 | .50 | 25000 | 50000 | 25000 | .5000 | .5000 | 26125 | 52250 | 26125 | 25000 | 54500 | 25000 | -4500 | 193.78 |
| 100000 | 1.10 | .50 | .50 | 25000 | 50000 | 25000 | .5000 | .5000 | 26250 | 52500 | 26250 | 25000 | 55000 | 25000 | -5000 | 238.10 |
| 100000 | 1.11 | .50 | .50 | 25000 | 50000 | 25000 | .5000 | .5000 | 26375 | 52750 | 26375 | 25000 | 55500 | 25000 | -5500 | 286.7  |

|        |      |     |     |       |       |       |       |       |       |       |       |       |       |       |        |         |
|--------|------|-----|-----|-------|-------|-------|-------|-------|-------|-------|-------|-------|-------|-------|--------|---------|
|        |      |     |     |       |       |       |       |       |       |       |       |       |       |       |        | 3       |
| 100000 | 1.12 | .50 | .50 | 25000 | 50000 | 25000 | .5000 | .5000 | 26500 | 53000 | 26500 | 25000 | 56000 | 25000 | -6000  | 339.62  |
| 100000 | 1.13 | .50 | .50 | 25000 | 50000 | 25000 | .5000 | .5000 | 26625 | 53250 | 26625 | 25000 | 56500 | 25000 | -6500  | 396.71  |
| 100000 | 1.14 | .50 | .50 | 25000 | 50000 | 25000 | .5000 | .5000 | 26750 | 53500 | 26750 | 25000 | 57000 | 25000 | -7000  | 457.94  |
| 100000 | 1.15 | .50 | .50 | 25000 | 50000 | 25000 | .5000 | .5000 | 26875 | 53750 | 26875 | 25000 | 57500 | 25000 | -7500  | 523.26  |
| 100000 | 1.16 | .50 | .50 | 25000 | 50000 | 25000 | .5000 | .5000 | 27000 | 54000 | 27000 | 25000 | 58000 | 25000 | -8000  | 592.59  |
| 100000 | 1.17 | .50 | .50 | 25000 | 50000 | 25000 | .5000 | .5000 | 27125 | 54250 | 27125 | 25000 | 58500 | 25000 | -8500  | 665.90  |
| 100000 | 1.18 | .50 | .50 | 25000 | 50000 | 25000 | .5000 | .5000 | 27250 | 54500 | 27250 | 25000 | 59000 | 25000 | -9000  | 743.12  |
| 100000 | 1.19 | .50 | .50 | 25000 | 50000 | 25000 | .5000 | .5000 | 27375 | 54750 | 27375 | 25000 | 59500 | 25000 | -9500  | 824.20  |
| 100000 | 1.20 | .50 | .50 | 25000 | 50000 | 25000 | .5000 | .5000 | 27500 | 55000 | 27500 | 25000 | 60000 | 25000 | -10000 | 909.09  |
| 100000 | .80  | .55 | .45 | 30250 | 49500 | 20250 | .5555 | .4445 | 27802 | 44495 | 17802 | 30250 | 39600 | 20250 | 9900   | 1090.48 |
| 100000 | .81  | .55 | .45 | 30250 | 49500 | 20250 | .5552 | .4448 | 27925 | 44746 | 17925 | 30250 | 40095 | 20250 | 9405   | 978.63  |
| 100000 | .82  | .55 | .45 | 30250 | 49500 | 20250 | .5549 | .4451 | 28047 | 44996 | 18047 | 30250 | 40590 | 20250 | 8910   | 873.43  |
| 100000 | .83  | .55 | .45 | 30250 | 49500 | 20250 | .5546 | .4454 | 28169 | 45247 | 18169 | 30250 | 41085 | 20250 | 8415   | 774.76  |
| 100000 | .84  | .55 | .45 | 30250 | 49500 | 20250 | .5543 | .4457 | 28292 | 45497 | 18292 | 30250 | 41580 | 20250 | 7920   | 682.50  |
| 100000 | .85  | .55 | .45 | 30250 | 49500 | 20250 | .5540 | .4460 | 28414 | 45747 | 18414 | 30250 | 42075 | 20250 | 7425   | 596.57  |
| 100000 | .86  | .55 | .45 | 30250 | 49500 | 20250 | .5537 | .4463 | 28536 | 45998 | 18536 | 30250 | 42570 | 20250 | 6930   | 516.84  |
| 100000 | .87  | .55 | .45 | 30250 | 49500 | 20250 | .5534 | .4466 | 28658 | 46248 | 18658 | 30250 | 43065 | 20250 | 6435   | 443.2   |

|        |      |     |     |       |       |       |       |       |       |       |       |       |       |       |       |        |
|--------|------|-----|-----|-------|-------|-------|-------|-------|-------|-------|-------|-------|-------|-------|-------|--------|
|        |      |     |     |       |       |       |       |       |       |       |       |       |       |       |       | 3      |
| 100000 | .88  | .55 | .45 | 30250 | 49500 | 20250 | .5532 | .4468 | 28781 | 46498 | 18781 | 30250 | 43560 | 20250 | 5940  | 375.63 |
| 100000 | .89  | .55 | .45 | 30250 | 49500 | 20250 | .5529 | .4471 | 28903 | 46749 | 18903 | 30250 | 44055 | 20250 | 5445  | 313.94 |
| 100000 | .90  | .55 | .45 | 30250 | 49500 | 20250 | .5526 | .4474 | 29026 | 46999 | 19026 | 30250 | 44550 | 20250 | 4950  | 258.07 |
| 100000 | .91  | .55 | .45 | 30250 | 49500 | 20250 | .5523 | .4477 | 29148 | 47249 | 19148 | 30250 | 45045 | 20250 | 4455  | 207.93 |
| 100000 | .92  | .55 | .45 | 30250 | 49500 | 20250 | .5521 | .4479 | 29270 | 47499 | 19270 | 30250 | 45540 | 20250 | 3960  | 163.42 |
| 100000 | .93  | .55 | .45 | 30250 | 49500 | 20250 | .5518 | .4482 | 29393 | 47750 | 19393 | 30250 | 46035 | 20250 | 3465  | 124.47 |
| 100000 | .94  | .55 | .45 | 30250 | 49500 | 20250 | .5515 | .4485 | 29515 | 48000 | 19515 | 30250 | 46530 | 20250 | 2970  | 90.97  |
| 100000 | .95  | .55 | .45 | 30250 | 49500 | 20250 | .5513 | .4487 | 29638 | 48250 | 19638 | 30250 | 47025 | 20250 | 2475  | 62.84  |
| 100000 | .96  | .55 | .45 | 30250 | 49500 | 20250 | .5510 | .4490 | 29760 | 48500 | 19760 | 30250 | 47520 | 20250 | 1980  | 40.01  |
| 100000 | .97  | .55 | .45 | 30250 | 49500 | 20250 | .5508 | .4492 | 29883 | 48750 | 19883 | 30250 | 48015 | 20250 | 1485  | 22.39  |
| 100000 | .98  | .55 | .45 | 30250 | 49500 | 20250 | .5505 | .4495 | 30005 | 49000 | 20005 | 30250 | 48510 | 20250 | 990   | 9.90   |
| 100000 | .99  | .55 | .45 | 30250 | 49500 | 20250 | .5502 | .4498 | 30127 | 49250 | 20127 | 30250 | 49005 | 20250 | 495   | 2.46   |
| 100000 | 1.00 | .55 | .45 | 30250 | 49500 | 20250 | .5500 | .4500 | 30250 | 49500 | 20250 | 30250 | 49500 | 20250 | 0     | .00    |
| 100000 | 1.01 | .55 | .45 | 30250 | 49500 | 20250 | .5498 | .4502 | 30373 | 49750 | 20373 | 30250 | 49995 | 20250 | -495  | 2.44   |
| 100000 | 1.02 | .55 | .45 | 30250 | 49500 | 20250 | .5495 | .4505 | 30495 | 50000 | 20495 | 30250 | 50490 | 20250 | -990  | 9.70   |
| 100000 | 1.03 | .55 | .45 | 30250 | 49500 | 20250 | .5493 | .4507 | 30618 | 50250 | 20618 | 30250 | 50985 | 20250 | -1485 | 21.72  |
| 100000 | 1.04 | .55 | .45 | 30250 | 49500 | 20250 | .5490 | .4510 | 30740 | 50500 | 20740 | 30250 | 51480 | 20250 | -1980 | 38.43  |
| 100000 | 1.05 | .55 | .45 | 30250 | 49500 | 20250 | .5488 | .4512 | 30863 | 50750 | 20863 | 30250 | 51975 | 20250 | -2475 | 59.75  |
| 100000 | 1.06 | .55 | .45 | 30250 | 49500 | 20250 | .5486 | .4514 | 30985 | 50999 | 20985 | 30250 | 52470 | 20250 | -2970 | 85.62  |
| 100000 | 1.07 | .55 | .45 | 30250 | 49500 | 20250 | .5483 | .4517 | 31108 | 51249 | 21108 | 30250 | 52965 | 20250 | -3465 | 115.97 |
| 100000 | 1.08 | .55 | .45 | 30250 | 49500 | 20250 | .5481 | .4519 | 31230 | 51499 | 21230 | 30250 | 53460 | 20250 | -3960 | 150.73 |
| 100000 | 1.09 | .55 | .45 | 30250 | 49500 | 20250 | .5479 | .4521 | 31353 | 51749 | 21353 | 30250 | 53955 | 20250 | -4455 | 189.85 |
| 100000 | 1.10 | .55 | .45 | 30250 | 49500 | 20250 | .5476 | .4524 | 31476 | 51999 | 21476 | 30250 | 54450 | 20250 | -4950 | 233.26 |

|        |      |     |     |       |       |       |       |       |       |       |       |       |       |       |       |         |
|--------|------|-----|-----|-------|-------|-------|-------|-------|-------|-------|-------|-------|-------|-------|-------|---------|
| 100000 | 1.11 | .55 | .45 | 30250 | 49500 | 20250 | .5474 | .4526 | 31598 | 52248 | 21598 | 30250 | 54945 | 20250 | -5445 | 280.89  |
| 100000 | 1.12 | .55 | .45 | 30250 | 49500 | 20250 | .5472 | .4528 | 31721 | 52498 | 21721 | 30250 | 55440 | 20250 | -5940 | 332.70  |
| 100000 | 1.13 | .55 | .45 | 30250 | 49500 | 20250 | .5470 | .4530 | 31844 | 52748 | 21844 | 30250 | 55935 | 20250 | -6435 | 388.61  |
| 100000 | 1.14 | .55 | .45 | 30250 | 49500 | 20250 | .5468 | .4532 | 31966 | 52997 | 21966 | 30250 | 56430 | 20250 | -6930 | 448.58  |
| 100000 | 1.15 | .55 | .45 | 30250 | 49500 | 20250 | .5465 | .4535 | 32089 | 53247 | 22089 | 30250 | 56925 | 20250 | -7425 | 512.54  |
| 100000 | 1.16 | .55 | .45 | 30250 | 49500 | 20250 | .5463 | .4537 | 32212 | 53497 | 22212 | 30250 | 57420 | 20250 | -7920 | 580.43  |
| 100000 | 1.17 | .55 | .45 | 30250 | 49500 | 20250 | .5461 | .4539 | 32334 | 53746 | 22334 | 30250 | 57915 | 20250 | -8415 | 652.22  |
| 100000 | 1.18 | .55 | .45 | 30250 | 49500 | 20250 | .5459 | .4541 | 32457 | 53996 | 22457 | 30250 | 58410 | 20250 | -8910 | 727.83  |
| 100000 | 1.19 | .55 | .45 | 30250 | 49500 | 20250 | .5457 | .4543 | 32580 | 54245 | 22580 | 30250 | 58905 | 20250 | -9405 | 807.22  |
| 100000 | 1.20 | .55 | .45 | 30250 | 49500 | 20250 | .5455 | .4545 | 32702 | 54495 | 22702 | 30250 | 59400 | 20250 | -9900 | 890.34  |
| 100000 | .80  | .60 | .40 | 36000 | 48000 | 16000 | .6106 | .3894 | 33706 | 42988 | 13706 | 36000 | 38400 | 16000 | 9600  | 1029.57 |
| 100000 | .81  | .60 | .40 | 36000 | 48000 | 16000 | .6100 | .3900 | 33820 | 43239 | 13820 | 36000 | 38880 | 16000 | 9120  | 923.73  |
| 100000 | .82  | .60 | .40 | 36000 | 48000 | 16000 | .6095 | .3905 | 33935 | 43491 | 13935 | 36000 | 39360 | 16000 | 8640  | 824.22  |
| 100000 | .83  | .60 | .40 | 36000 | 48000 | 16000 | .6089 | .3911 | 34049 | 43742 | 14049 | 36000 | 39840 | 16000 | 8160  | 730.92  |
| 100000 | .84  | .60 | .40 | 36000 | 48000 | 16000 | .6083 | .3917 | 34163 | 43994 | 14163 | 36000 | 40320 | 16000 | 7680  | 643.73  |
| 100000 | .85  | .60 | .40 | 36000 | 48000 | 16000 | .6078 | .3922 | 34278 | 44245 | 14278 | 36000 | 40800 | 16000 | 7200  | 562.55  |
| 100000 | .86  | .60 | .40 | 36000 | 48000 | 16000 | .6072 | .3928 | 34392 | 44496 | 14392 | 36000 | 41280 | 16000 | 6720  | 487.26  |



|        |      |     |     |       |       |       |       |       |       |       |       |       |       |       |       |        |
|--------|------|-----|-----|-------|-------|-------|-------|-------|-------|-------|-------|-------|-------|-------|-------|--------|
| 100000 | .87  | .60 | .40 | 36000 | 48000 | 16000 | .6067 | .3933 | 34507 | 44747 | 14507 | 36000 | 41760 | 16000 | 6240  | 417.76 |
| 100000 | .88  | .60 | .40 | 36000 | 48000 | 16000 | .6061 | .3939 | 34621 | 44998 | 14621 | 36000 | 42240 | 16000 | 5760  | 353.97 |
| 100000 | .89  | .60 | .40 | 36000 | 48000 | 16000 | .6056 | .3944 | 34736 | 45249 | 14736 | 36000 | 42720 | 16000 | 5280  | 295.78 |
| 100000 | .90  | .60 | .40 | 36000 | 48000 | 16000 | .6050 | .3950 | 34850 | 45499 | 14850 | 36000 | 43200 | 16000 | 4800  | 243.09 |
| 100000 | .91  | .60 | .40 | 36000 | 48000 | 16000 | .6045 | .3955 | 34965 | 45750 | 14965 | 36000 | 43680 | 16000 | 4320  | 195.82 |
| 100000 | .92  | .60 | .40 | 36000 | 48000 | 16000 | .6040 | .3960 | 35080 | 46000 | 15080 | 36000 | 44160 | 16000 | 3840  | 153.88 |
| 100000 | .93  | .60 | .40 | 36000 | 48000 | 16000 | .6035 | .3965 | 35195 | 46250 | 15195 | 36000 | 44640 | 16000 | 3360  | 117.17 |
| 100000 | .94  | .60 | .40 | 36000 | 48000 | 16000 | .6030 | .3970 | 35310 | 46501 | 15310 | 36000 | 45120 | 16000 | 2880  | 85.62  |
| 100000 | .95  | .60 | .40 | 36000 | 48000 | 16000 | .6025 | .3975 | 35425 | 46751 | 15425 | 36000 | 45600 | 16000 | 2400  | 59.14  |
| 100000 | .96  | .60 | .40 | 36000 | 48000 | 16000 | .6020 | .3980 | 35540 | 47001 | 15540 | 36000 | 46080 | 16000 | 1920  | 37.65  |
| 100000 | .97  | .60 | .40 | 36000 | 48000 | 16000 | .6015 | .3985 | 35655 | 47251 | 15655 | 36000 | 46560 | 16000 | 1440  | 21.06  |
| 100000 | .98  | .60 | .40 | 36000 | 48000 | 16000 | .6010 | .3990 | 35770 | 47501 | 15770 | 36000 | 47040 | 16000 | 960   | 9.31   |
| 100000 | .99  | .60 | .40 | 36000 | 48000 | 16000 | .6005 | .3995 | 35885 | 47750 | 15885 | 36000 | 47520 | 16000 | 480   | 2.32   |
| 100000 | 1.00 | .60 | .40 | 36000 | 48000 | 16000 | .6000 | .4000 | 36000 | 48000 | 16000 | 36000 | 48000 | 16000 | 0     | .00    |
| 100000 | 1.01 | .60 | .40 | 36000 | 48000 | 16000 | .5995 | .4005 | 36115 | 48250 | 16115 | 36000 | 48480 | 16000 | -480  | 2.29   |
| 100000 | 1.02 | .60 | .40 | 36000 | 48000 | 16000 | .5990 | .4010 | 36230 | 48499 | 16230 | 36000 | 48960 | 16000 | -960  | 9.12   |
| 100000 | 1.03 | .60 | .40 | 36000 | 48000 | 16000 | .5986 | .4014 | 36346 | 48748 | 16346 | 36000 | 49440 | 16000 | -1440 | 20.42  |
| 100000 | 1.04 | .60 | .40 | 36000 | 48000 | 16000 | .5981 | .4019 | 36461 | 48998 | 16461 | 36000 | 49920 | 16000 | -1920 | 36.11  |
| 100000 | 1.05 | .60 | .40 | 36000 | 48000 | 16000 | .5977 | .4023 | 36577 | 49247 | 16577 | 36000 | 50400 | 16000 | -2400 | 56.14  |
| 100000 | 1.06 | .60 | .40 | 36000 | 48000 | 16000 | .5972 | .4028 | 36692 | 49496 | 16692 | 36000 | 50880 | 16000 | -2880 | 80.44  |
| 100000 | 1.07 | .60 | .40 | 36000 | 48000 | 16000 | .5967 | .4033 | 36807 | 49745 | 16807 | 36000 | 51360 | 16000 | -3360 | 108.94 |
| 100000 | 1.08 | .60 | .40 | 36000 | 48000 | 16000 | .5963 | .4037 | 36923 | 49994 | 16923 | 36000 | 51840 | 16000 | -3840 | 141.58 |
| 100000 | 1.09 | .60 | .40 | 36000 | 48000 | 16000 | .5959 | .4041 | 37039 | 50243 | 17039 | 36000 | 52320 | 16000 | -4320 | 178.31 |
| 100000 | 1.10 | .60 | .40 | 36000 | 48000 | 16000 | .5954 | .4046 | 37154 | 50492 | 17154 | 36000 | 52800 | 16000 | -4800 | 219.0  |

|        |      |     |     |       |       |       |       |       |       |       |       |       |       |       |       |        |
|--------|------|-----|-----|-------|-------|-------|-------|-------|-------|-------|-------|-------|-------|-------|-------|--------|
|        |      |     |     |       |       |       |       |       |       |       |       |       |       |       |       | 5      |
| 100000 | 1.11 | .60 | .40 | 36000 | 48000 | 16000 | .5950 | .4050 | 37270 | 50740 | 17270 | 36000 | 53280 | 16000 | -5280 | 263.76 |
| 100000 | 1.12 | .60 | .40 | 36000 | 48000 | 16000 | .5946 | .4054 | 37386 | 50989 | 17386 | 36000 | 53760 | 16000 | -5760 | 312.37 |
| 100000 | 1.13 | .60 | .40 | 36000 | 48000 | 16000 | .5941 | .4059 | 37501 | 51237 | 17501 | 36000 | 54240 | 16000 | -6240 | 364.83 |
| 100000 | 1.14 | .60 | .40 | 36000 | 48000 | 16000 | .5937 | .4063 | 37617 | 51486 | 17617 | 36000 | 54720 | 16000 | -6720 | 421.08 |
| 100000 | 1.15 | .60 | .40 | 36000 | 48000 | 16000 | .5933 | .4067 | 37733 | 51734 | 17733 | 36000 | 55200 | 16000 | -7200 | 481.07 |
| 100000 | 1.16 | .60 | .40 | 36000 | 48000 | 16000 | .5929 | .4071 | 37849 | 51983 | 17849 | 36000 | 55680 | 16000 | -7680 | 544.75 |
| 100000 | 1.17 | .60 | .40 | 36000 | 48000 | 16000 | .5925 | .4075 | 37965 | 52231 | 17965 | 36000 | 56160 | 16000 | -8160 | 612.07 |
| 100000 | 1.18 | .60 | .40 | 36000 | 48000 | 16000 | .5920 | .4080 | 38080 | 52479 | 18080 | 36000 | 56640 | 16000 | -8640 | 682.97 |
| 100000 | 1.19 | .60 | .40 | 36000 | 48000 | 16000 | .5916 | .4084 | 38196 | 52727 | 18196 | 36000 | 57120 | 16000 | -9120 | 757.40 |
| 100000 | 1.20 | .60 | .40 | 36000 | 48000 | 16000 | .5912 | .4088 | 38312 | 52975 | 18312 | 36000 | 57600 | 16000 | -9600 | 835.32 |
| 100000 | .80  | .65 | .35 | 42250 | 45500 | 12250 | .6650 | .3350 | 40200 | 40500 | 10200 | 42250 | 36400 | 12250 | 9100  | 931.38 |
| 100000 | .81  | .65 | .35 | 42250 | 45500 | 12250 | .6642 | .3358 | 40302 | 40752 | 10302 | 42250 | 36855 | 12250 | 8645  | 835.27 |
| 100000 | .82  | .65 | .35 | 42250 | 45500 | 12250 | .6634 | .3366 | 40403 | 41004 | 10403 | 42250 | 37310 | 12250 | 8190  | 744.97 |
| 100000 | .83  | .65 | .35 | 42250 | 45500 | 12250 | .6626 | .3374 | 40505 | 41255 | 10505 | 42250 | 37765 | 12250 | 7735  | 660.37 |
| 100000 | .84  | .65 | .35 | 42250 | 45500 | 12250 | .6618 | .3382 | 40607 | 41507 | 10607 | 42250 | 38220 | 12250 | 7280  | 581.37 |
| 100000 | .85  | .65 | .35 | 42250 | 45500 | 12250 | .6610 | .3390 | 40709 | 41758 | 10709 | 42250 | 38675 | 12250 | 6825  | 507.85 |
| 100000 | .86  | .65 | .35 | 42250 | 45500 | 12250 | .6602 | .3398 | 40811 | 42009 | 10811 | 42250 | 39130 | 12250 | 6370  | 439.7  |

|        |      |     |     |       |       |       |       |       |       |       |       |       |       |       |       |        |
|--------|------|-----|-----|-------|-------|-------|-------|-------|-------|-------|-------|-------|-------|-------|-------|--------|
|        |      |     |     |       |       |       |       |       |       |       |       |       |       |       |       | 1      |
| 100000 | .87  | .65 | .35 | 42250 | 45500 | 12250 | .6594 | .3406 | 40913 | 42260 | 10913 | 42250 | 39585 | 12250 | 5915  | 376.86 |
| 100000 | .88  | .65 | .35 | 42250 | 45500 | 12250 | .6587 | .3413 | 41015 | 42510 | 11015 | 42250 | 40040 | 12250 | 5460  | 319.20 |
| 100000 | .89  | .65 | .35 | 42250 | 45500 | 12250 | .6579 | .3421 | 41117 | 42760 | 11117 | 42250 | 40495 | 12250 | 5005  | 266.63 |
| 100000 | .90  | .65 | .35 | 42250 | 45500 | 12250 | .6572 | .3428 | 41220 | 43010 | 11220 | 42250 | 40950 | 12250 | 4550  | 219.06 |
| 100000 | .91  | .65 | .35 | 42250 | 45500 | 12250 | .6564 | .3436 | 41322 | 43260 | 11322 | 42250 | 41405 | 12250 | 4095  | 176.41 |
| 100000 | .92  | .65 | .35 | 42250 | 45500 | 12250 | .6557 | .3443 | 41425 | 43510 | 11425 | 42250 | 41860 | 12250 | 3640  | 138.58 |
| 100000 | .93  | .65 | .35 | 42250 | 45500 | 12250 | .6549 | .3451 | 41528 | 43759 | 11528 | 42250 | 42315 | 12250 | 3185  | 105.49 |
| 100000 | .94  | .65 | .35 | 42250 | 45500 | 12250 | .6542 | .3458 | 41631 | 44009 | 11631 | 42250 | 42770 | 12250 | 2730  | 77.06  |
| 100000 | .95  | .65 | .35 | 42250 | 45500 | 12250 | .6535 | .3465 | 41734 | 44258 | 11734 | 42250 | 43225 | 12250 | 2275  | 53.21  |
| 100000 | .96  | .65 | .35 | 42250 | 45500 | 12250 | .6528 | .3472 | 41837 | 44507 | 11837 | 42250 | 43680 | 12250 | 1820  | 33.86  |
| 100000 | .97  | .65 | .35 | 42250 | 45500 | 12250 | .6521 | .3479 | 41940 | 44755 | 11940 | 42250 | 44135 | 12250 | 1365  | 18.94  |
| 100000 | .98  | .65 | .35 | 42250 | 45500 | 12250 | .6514 | .3486 | 42043 | 45004 | 12043 | 42250 | 44590 | 12250 | 910   | 8.37   |
| 100000 | .99  | .65 | .35 | 42250 | 45500 | 12250 | .6507 | .3493 | 42147 | 45252 | 12147 | 42250 | 45045 | 12250 | 455   | 2.08   |
| 100000 | 1.00 | .65 | .35 | 42250 | 45500 | 12250 | .6500 | .3500 | 42250 | 45500 | 12250 | 42250 | 45500 | 12250 | 0     | .00    |
| 100000 | 1.01 | .65 | .35 | 42250 | 45500 | 12250 | .6493 | .3507 | 42354 | 45748 | 12354 | 42250 | 45955 | 12250 | -455  | 2.06   |
| 100000 | 1.02 | .65 | .35 | 42250 | 45500 | 12250 | .6486 | .3514 | 42457 | 45996 | 12457 | 42250 | 46410 | 12250 | -910  | 8.19   |
| 100000 | 1.03 | .65 | .35 | 42250 | 45500 | 12250 | .6480 | .3520 | 42561 | 46243 | 12561 | 42250 | 46865 | 12250 | -1365 | 18.33  |
| 100000 | 1.04 | .65 | .35 | 42250 | 45500 | 12250 | .6473 | .3527 | 42665 | 46490 | 12665 | 42250 | 47320 | 12250 | -1820 | 32.42  |
| 100000 | 1.05 | .65 | .35 | 42250 | 45500 | 12250 | .6467 | .3533 | 42769 | 46738 | 12769 | 42250 | 47775 | 12250 | -2275 | 50.39  |
| 100000 | 1.06 | .65 | .35 | 42250 | 45500 | 12250 | .6460 | .3540 | 42873 | 46985 | 12873 | 42250 | 48230 | 12250 | -2730 | 72.18  |
| 100000 | 1.07 | .65 | .35 | 42250 | 45500 | 12250 | .6454 | .3546 | 42977 | 47231 | 12977 | 42250 | 48685 | 12250 | -3185 | 97.73  |
| 100000 | 1.08 | .65 | .35 | 42250 | 45500 | 12250 | .6447 | .3553 | 43081 | 47478 | 13081 | 42250 | 49140 | 12250 | -3640 | 126.99 |
| 100000 | 1.09 | .65 | .35 | 42250 | 45500 | 12250 | .6441 | .3559 | 43185 | 47725 | 13185 | 42250 | 49595 | 12250 | -4095 | 159.90 |

|        |      |     |     |       |       |       |       |       |       |       |       |       |       |       |       |        |
|--------|------|-----|-----|-------|-------|-------|-------|-------|-------|-------|-------|-------|-------|-------|-------|--------|
| 100000 | 1.10 | .65 | .35 | 42250 | 45500 | 12250 | .6435 | .3565 | 43290 | 47971 | 13290 | 42250 | 50050 | 12250 | -4550 | 196.40 |
| 100000 | 1.11 | .65 | .35 | 42250 | 45500 | 12250 | .6429 | .3571 | 43394 | 48217 | 13394 | 42250 | 50505 | 12250 | -5005 | 236.44 |
| 100000 | 1.12 | .65 | .35 | 42250 | 45500 | 12250 | .6422 | .3578 | 43499 | 48463 | 13499 | 42250 | 50960 | 12250 | -5460 | 279.97 |
| 100000 | 1.13 | .65 | .35 | 42250 | 45500 | 12250 | .6416 | .3584 | 43603 | 48709 | 13603 | 42250 | 51415 | 12250 | -5915 | 326.93 |
| 100000 | 1.14 | .65 | .35 | 42250 | 45500 | 12250 | .6410 | .3590 | 43708 | 48954 | 13708 | 42250 | 51870 | 12250 | -6370 | 377.28 |
| 100000 | 1.15 | .65 | .35 | 42250 | 45500 | 12250 | .6404 | .3596 | 43812 | 49200 | 13812 | 42250 | 52325 | 12250 | -6825 | 430.96 |
| 100000 | 1.16 | .65 | .35 | 42250 | 45500 | 12250 | .6398 | .3602 | 43917 | 49445 | 13917 | 42250 | 52780 | 12250 | -7280 | 487.94 |
| 100000 | 1.17 | .65 | .35 | 42250 | 45500 | 12250 | .6392 | .3608 | 44022 | 49691 | 14022 | 42250 | 53235 | 12250 | -7735 | 548.15 |
| 100000 | 1.18 | .65 | .35 | 42250 | 45500 | 12250 | .6386 | .3614 | 44127 | 49936 | 14127 | 42250 | 53690 | 12250 | -8190 | 611.55 |
| 100000 | 1.19 | .65 | .35 | 42250 | 45500 | 12250 | .6381 | .3619 | 44232 | 50181 | 14232 | 42250 | 54145 | 12250 | -8645 | 678.11 |
| 100000 | 1.20 | .65 | .35 | 42250 | 45500 | 12250 | .6375 | .3625 | 44337 | 50425 | 14337 | 42250 | 54600 | 12250 | -9100 | 747.77 |
| 100000 | .80  | .70 | .30 | 49000 | 42000 | 9000  | .7183 | .2817 | 47267 | 37066 | 7267  | 49000 | 33600 | 9000  | 8400  | 801.10 |
| 100000 | .81  | .70 | .30 | 49000 | 42000 | 9000  | .7173 | .2827 | 47352 | 37316 | 7352  | 49000 | 34020 | 9000  | 7980  | 718.00 |
| 100000 | .82  | .70 | .30 | 49000 | 42000 | 9000  | .7164 | .2836 | 47437 | 37566 | 7437  | 49000 | 34440 | 9000  | 7560  | 640.00 |
| 100000 | .83  | .70 | .30 | 49000 | 42000 | 9000  | .7154 | .2846 | 47523 | 37815 | 7523  | 49000 | 34860 | 9000  | 7140  | 567.00 |
| 100000 | .84  | .70 | .30 | 49000 | 42000 | 9000  | .7144 | .2856 | 47608 | 38064 | 7608  | 49000 | 35280 | 9000  | 6720  | 498.89 |
| 100000 | .85  | .70 | .30 | 49000 | 42000 | 9000  | .7134 | .2866 | 47694 | 38312 | 7694  | 49000 | 35700 | 9000  | 6300  | 435.56 |

|        |      |     |     |       |       |      |       |       |       |       |      |       |       |      |       |        |
|--------|------|-----|-----|-------|-------|------|-------|-------|-------|-------|------|-------|-------|------|-------|--------|
| 100000 | .86  | .70 | .30 | 49000 | 42000 | 9000 | .7125 | .2875 | 47780 | 38560 | 7780 | 49000 | 36120 | 9000 | 5880  | 376.93 |
| 100000 | .87  | .70 | .30 | 49000 | 42000 | 9000 | .7116 | .2884 | 47866 | 38808 | 7866 | 49000 | 36540 | 9000 | 5460  | 322.89 |
| 100000 | .88  | .70 | .30 | 49000 | 42000 | 9000 | .7106 | .2894 | 47952 | 39055 | 7952 | 49000 | 36960 | 9000 | 5040  | 273.35 |
| 100000 | .89  | .70 | .30 | 49000 | 42000 | 9000 | .7097 | .2903 | 48039 | 39302 | 8039 | 49000 | 37380 | 9000 | 4620  | 228.22 |
| 100000 | .90  | .70 | .30 | 49000 | 42000 | 9000 | .7088 | .2912 | 48125 | 39549 | 8125 | 49000 | 37800 | 9000 | 4200  | 187.41 |
| 100000 | .91  | .70 | .30 | 49000 | 42000 | 9000 | .7079 | .2921 | 48212 | 39796 | 8212 | 49000 | 38220 | 9000 | 3780  | 150.85 |
| 100000 | .92  | .70 | .30 | 49000 | 42000 | 9000 | .7070 | .2930 | 48299 | 40042 | 8299 | 49000 | 38640 | 9000 | 3360  | 118.45 |
| 100000 | .93  | .70 | .30 | 49000 | 42000 | 9000 | .7061 | .2939 | 48386 | 40288 | 8386 | 49000 | 39060 | 9000 | 2940  | 90.13  |
| 100000 | .94  | .70 | .30 | 49000 | 42000 | 9000 | .7052 | .2948 | 48473 | 40533 | 8473 | 49000 | 39480 | 9000 | 2520  | 65.81  |
| 100000 | .95  | .70 | .30 | 49000 | 42000 | 9000 | .7043 | .2957 | 48561 | 40778 | 8561 | 49000 | 39900 | 9000 | 2100  | 45.43  |
| 100000 | .96  | .70 | .30 | 49000 | 42000 | 9000 | .7034 | .2966 | 48648 | 41023 | 8648 | 49000 | 40320 | 9000 | 1680  | 28.90  |
| 100000 | .97  | .70 | .30 | 49000 | 42000 | 9000 | .7026 | .2974 | 48736 | 41268 | 8736 | 49000 | 40740 | 9000 | 1260  | 16.16  |
| 100000 | .98  | .70 | .30 | 49000 | 42000 | 9000 | .7017 | .2983 | 48824 | 41512 | 8824 | 49000 | 41160 | 9000 | 840   | 7.14   |
| 100000 | .99  | .70 | .30 | 49000 | 42000 | 9000 | .7008 | .2992 | 48912 | 41756 | 8912 | 49000 | 41580 | 9000 | 420   | 1.77   |
| 100000 | 1.00 | .70 | .30 | 49000 | 42000 | 9000 | .7000 | .3000 | 49000 | 42000 | 9000 | 49000 | 42000 | 9000 | 0     | .00    |
| 100000 | 1.01 | .70 | .30 | 49000 | 42000 | 9000 | .6992 | .3008 | 49088 | 42243 | 9088 | 49000 | 42420 | 9000 | -420  | 1.75   |
| 100000 | 1.02 | .70 | .30 | 49000 | 42000 | 9000 | .6983 | .3017 | 49177 | 42487 | 9177 | 49000 | 42840 | 9000 | -840  | 6.98   |
| 100000 | 1.03 | .70 | .30 | 49000 | 42000 | 9000 | .6975 | .3025 | 49265 | 42730 | 9265 | 49000 | 43260 | 9000 | -1260 | 15.61  |
| 100000 | 1.04 | .70 | .30 | 49000 | 42000 | 9000 | .6967 | .3033 | 49354 | 42972 | 9354 | 49000 | 43680 | 9000 | -1680 | 27.59  |
| 100000 | 1.05 | .70 | .30 | 49000 | 42000 | 9000 | .6959 | .3041 | 49443 | 43215 | 9443 | 49000 | 44100 | 9000 | -2100 | 42.86  |
| 100000 | 1.06 | .70 | .30 | 49000 | 42000 | 9000 | .6951 | .3049 | 49532 | 43457 | 9532 | 49000 | 44520 | 9000 | -2520 | 61.38  |
| 100000 | 1.07 | .70 | .30 | 49000 | 42000 | 9000 | .6943 | .3057 | 49621 | 43698 | 9621 | 49000 | 44940 | 9000 | -2940 | 83.09  |
| 100000 | 1.08 | .70 | .30 | 49000 | 42000 | 9000 | .6935 | .3065 | 49710 | 43940 | 9710 | 49000 | 45360 | 9000 | -3360 | 107.94 |
| 100000 | 1.09 | .70 | .30 | 49000 | 42000 | 9000 | .6927 | .3073 | 49799 | 44181 | 9799 | 49000 | 45780 | 9000 | -3780 | 135.87 |

|        |      |     |     |       |       |      |       |       |       |       |       |       |       |      |       |        |
|--------|------|-----|-----|-------|-------|------|-------|-------|-------|-------|-------|-------|-------|------|-------|--------|
| 100000 | 1.10 | .70 | .30 | 49000 | 42000 | 9000 | .6919 | .3081 | 49889 | 44422 | 9889  | 49000 | 46200 | 9000 | -4200 | 166.84 |
| 100000 | 1.11 | .70 | .30 | 49000 | 42000 | 9000 | .6912 | .3088 | 49978 | 44663 | 9978  | 49000 | 46620 | 9000 | -4620 | 200.80 |
| 100000 | 1.12 | .70 | .30 | 49000 | 42000 | 9000 | .6904 | .3096 | 50068 | 44904 | 10068 | 49000 | 47040 | 9000 | -5040 | 237.71 |
| 100000 | 1.13 | .70 | .30 | 49000 | 42000 | 9000 | .6896 | .3104 | 50158 | 45144 | 10158 | 49000 | 47460 | 9000 | -5460 | 277.52 |
| 100000 | 1.14 | .70 | .30 | 49000 | 42000 | 9000 | .6889 | .3111 | 50248 | 45384 | 10248 | 49000 | 47880 | 9000 | -5880 | 320.18 |
| 100000 | 1.15 | .70 | .30 | 49000 | 42000 | 9000 | .6881 | .3119 | 50338 | 45624 | 10338 | 49000 | 48300 | 9000 | -6300 | 365.66 |
| 100000 | 1.16 | .70 | .30 | 49000 | 42000 | 9000 | .6874 | .3126 | 50428 | 45864 | 10428 | 49000 | 48720 | 9000 | -6720 | 413.90 |
| 100000 | 1.17 | .70 | .30 | 49000 | 42000 | 9000 | .6867 | .3133 | 50518 | 46103 | 10518 | 49000 | 49140 | 9000 | -7140 | 464.88 |
| 100000 | 1.18 | .70 | .30 | 49000 | 42000 | 9000 | .6859 | .3141 | 50609 | 46342 | 10609 | 49000 | 49560 | 9000 | -7560 | 518.55 |
| 100000 | 1.19 | .70 | .30 | 49000 | 42000 | 9000 | .6852 | .3148 | 50699 | 46581 | 10699 | 49000 | 49980 | 9000 | -7980 | 574.87 |
| 100000 | 1.20 | .70 | .30 | 49000 | 42000 | 9000 | .6845 | .3155 | 50790 | 46820 | 10790 | 49000 | 50400 | 9000 | -8400 | 633.80 |
| 100000 | .80  | .75 | .25 | 56250 | 37500 | 6250 | .7703 | .2297 | 54882 | 32736 | 4882  | 56250 | 30000 | 6250 | 7500  | 646.34 |
| 100000 | .81  | .75 | .25 | 56250 | 37500 | 6250 | .7692 | .2308 | 54948 | 32979 | 4948  | 56250 | 30375 | 6250 | 7125  | 578.85 |
| 100000 | .82  | .75 | .25 | 56250 | 37500 | 6250 | .7681 | .2319 | 55015 | 33220 | 5015  | 56250 | 30750 | 6250 | 6750  | 515.58 |
| 100000 | .83  | .75 | .25 | 56250 | 37500 | 6250 | .7670 | .2330 | 55082 | 33461 | 5082  | 56250 | 31125 | 6250 | 6375  | 456.44 |
| 100000 | .84  | .75 | .25 | 56250 | 37500 | 6250 | .7660 | .2340 | 55149 | 33702 | 5149  | 56250 | 31500 | 6250 | 6000  | 401.33 |
| 100000 | .85  | .75 | .25 | 56250 | 37500 | 6250 | .7649 | .2351 | 55216 | 33942 | 5216  | 56250 | 31875 | 6250 | 5625  | 350.14 |

|        |      |     |     |       |       |      |       |       |       |       |      |       |       |      |       |        |
|--------|------|-----|-----|-------|-------|------|-------|-------|-------|-------|------|-------|-------|------|-------|--------|
| 100000 | .86  | .75 | .25 | 56250 | 37500 | 6250 | .7639 | .2361 | 55284 | 34182 | 5284 | 56250 | 32250 | 6250 | 5250  | 302.80 |
| 100000 | .87  | .75 | .25 | 56250 | 37500 | 6250 | .7628 | .2372 | 55352 | 34422 | 5352 | 56250 | 32625 | 6250 | 4875  | 259.22 |
| 100000 | .88  | .75 | .25 | 56250 | 37500 | 6250 | .7618 | .2382 | 55420 | 34661 | 5420 | 56250 | 33000 | 6250 | 4500  | 219.31 |
| 100000 | .89  | .75 | .25 | 56250 | 37500 | 6250 | .7608 | .2392 | 55488 | 34900 | 5488 | 56250 | 33375 | 6250 | 4125  | 182.99 |
| 100000 | .90  | .75 | .25 | 56250 | 37500 | 6250 | .7597 | .2403 | 55556 | 35138 | 5556 | 56250 | 33750 | 6250 | 3750  | 150.18 |
| 100000 | .91  | .75 | .25 | 56250 | 37500 | 6250 | .7587 | .2413 | 55625 | 35376 | 5625 | 56250 | 34125 | 6250 | 3375  | 120.81 |
| 100000 | .92  | .75 | .25 | 56250 | 37500 | 6250 | .7577 | .2423 | 55693 | 35613 | 5693 | 56250 | 34500 | 6250 | 3000  | 94.81  |
| 100000 | .93  | .75 | .25 | 56250 | 37500 | 6250 | .7567 | .2433 | 55762 | 35851 | 5762 | 56250 | 34875 | 6250 | 2625  | 72.10  |
| 100000 | .94  | .75 | .25 | 56250 | 37500 | 6250 | .7558 | .2442 | 55831 | 36087 | 5831 | 56250 | 35250 | 6250 | 2250  | 52.62  |
| 100000 | .95  | .75 | .25 | 56250 | 37500 | 6250 | .7548 | .2452 | 55901 | 36324 | 5901 | 56250 | 35625 | 6250 | 1875  | 36.30  |
| 100000 | .96  | .75 | .25 | 56250 | 37500 | 6250 | .7538 | .2462 | 55970 | 36560 | 5970 | 56250 | 36000 | 6250 | 1500  | 23.08  |
| 100000 | .97  | .75 | .25 | 56250 | 37500 | 6250 | .7528 | .2472 | 56040 | 36795 | 6040 | 56250 | 36375 | 6250 | 1125  | 12.90  |
| 100000 | .98  | .75 | .25 | 56250 | 37500 | 6250 | .7519 | .2481 | 56110 | 37031 | 6110 | 56250 | 36750 | 6250 | 750   | 5.70   |
| 100000 | .99  | .75 | .25 | 56250 | 37500 | 6250 | .7509 | .2491 | 56180 | 37265 | 6180 | 56250 | 37125 | 6250 | 375   | 1.42   |
| 100000 | 1.00 | .75 | .25 | 56250 | 37500 | 6250 | .7500 | .2500 | 56250 | 37500 | 6250 | 56250 | 37500 | 6250 | 0     | .00    |
| 100000 | 1.01 | .75 | .25 | 56250 | 37500 | 6250 | .7491 | .2509 | 56320 | 37734 | 6320 | 56250 | 37875 | 6250 | -375  | 1.40   |
| 100000 | 1.02 | .75 | .25 | 56250 | 37500 | 6250 | .7481 | .2519 | 56391 | 37968 | 6391 | 56250 | 38250 | 6250 | -750  | 5.56   |
| 100000 | 1.03 | .75 | .25 | 56250 | 37500 | 6250 | .7472 | .2528 | 56462 | 38202 | 6462 | 56250 | 38625 | 6250 | -1125 | 12.42  |
| 100000 | 1.04 | .75 | .25 | 56250 | 37500 | 6250 | .7463 | .2537 | 56533 | 38435 | 6533 | 56250 | 39000 | 6250 | -1500 | 21.95  |
| 100000 | 1.05 | .75 | .25 | 56250 | 37500 | 6250 | .7454 | .2546 | 56604 | 38668 | 6604 | 56250 | 39375 | 6250 | -1875 | 34.10  |
| 100000 | 1.06 | .75 | .25 | 56250 | 37500 | 6250 | .7445 | .2555 | 56675 | 38900 | 6675 | 56250 | 39750 | 6250 | -2250 | 48.81  |
| 100000 | 1.07 | .75 | .25 | 56250 | 37500 | 6250 | .7436 | .2564 | 56746 | 39132 | 6746 | 56250 | 40125 | 6250 | -2625 | 66.05  |
| 100000 | 1.08 | .75 | .25 | 56250 | 37500 | 6250 | .7427 | .2573 | 56818 | 39364 | 6818 | 56250 | 40500 | 6250 | -3000 | 85.77  |
| 100000 | 1.09 | .75 | .25 | 56250 | 37500 | 6250 | .7418 | .2582 | 56890 | 39596 | 6890 | 56250 | 40875 | 6250 | -3375 | 107.93 |
| 100000 | 1.10 | .75 | .25 | 56250 | 37500 | 6250 | .7410 | .2590 | 56962 | 39827 | 6962 | 56250 | 41250 | 6250 | -3750 | 132.48 |

|        |      |     |     |       |       |      |       |       |       |       |      |       |       |      |       |        |
|--------|------|-----|-----|-------|-------|------|-------|-------|-------|-------|------|-------|-------|------|-------|--------|
| 100000 | 1.11 | .75 | .25 | 56250 | 37500 | 6250 | .7401 | .2599 | 57034 | 40058 | 7034 | 56250 | 41625 | 6250 | -4125 | 159.40 |
| 100000 | 1.12 | .75 | .25 | 56250 | 37500 | 6250 | .7392 | .2608 | 57106 | 40288 | 7106 | 56250 | 42000 | 6250 | -4500 | 188.64 |
| 100000 | 1.13 | .75 | .25 | 56250 | 37500 | 6250 | .7384 | .2616 | 57178 | 40519 | 7178 | 56250 | 42375 | 6250 | -4875 | 220.16 |
| 100000 | 1.14 | .75 | .25 | 56250 | 37500 | 6250 | .7375 | .2625 | 57251 | 40749 | 7251 | 56250 | 42750 | 6250 | -5250 | 253.92 |
| 100000 | 1.15 | .75 | .25 | 56250 | 37500 | 6250 | .7367 | .2633 | 57323 | 40978 | 7323 | 56250 | 43125 | 6250 | -5625 | 289.90 |
| 100000 | 1.16 | .75 | .25 | 56250 | 37500 | 6250 | .7358 | .2642 | 57396 | 41208 | 7396 | 56250 | 43500 | 6250 | -6000 | 328.06 |
| 100000 | 1.17 | .75 | .25 | 56250 | 37500 | 6250 | .7350 | .2650 | 57469 | 41437 | 7469 | 56250 | 43875 | 6250 | -6375 | 368.36 |
| 100000 | 1.18 | .75 | .25 | 56250 | 37500 | 6250 | .7342 | .2658 | 57542 | 41665 | 7542 | 56250 | 44250 | 6250 | -6750 | 410.78 |
| 100000 | 1.19 | .75 | .25 | 56250 | 37500 | 6250 | .7334 | .2666 | 57616 | 41894 | 7616 | 56250 | 44625 | 6250 | -7125 | 455.27 |
| 100000 | 1.20 | .75 | .25 | 56250 | 37500 | 6250 | .7326 | .2674 | 57689 | 42122 | 7689 | 56250 | 45000 | 6250 | -7500 | 501.81 |
| 100000 | .80  | .80 | .20 | 64000 | 32000 | 4000 | .8205 | .1795 | 63015 | 27569 | 3015 | 64000 | 25600 | 4000 | 6400  | 477.55 |
| 100000 | .81  | .80 | .20 | 64000 | 32000 | 4000 | .8194 | .1806 | 63063 | 27795 | 3063 | 64000 | 25920 | 4000 | 6080  | 427.29 |
| 100000 | .82  | .80 | .20 | 64000 | 32000 | 4000 | .8183 | .1817 | 63110 | 28020 | 3110 | 64000 | 26240 | 4000 | 5760  | 380.24 |
| 100000 | .83  | .80 | .20 | 64000 | 32000 | 4000 | .8173 | .1827 | 63158 | 28244 | 3158 | 64000 | 26560 | 4000 | 5440  | 336.33 |
| 100000 | .84  | .80 | .20 | 64000 | 32000 | 4000 | .8162 | .1838 | 63206 | 28469 | 3206 | 64000 | 26880 | 4000 | 5120  | 295.47 |
| 100000 | .85  | .80 | .20 | 64000 | 32000 | 4000 | .8151 | .1849 | 63254 | 28692 | 3254 | 64000 | 27200 | 4000 | 4800  | 257.57 |
| 100000 | .86  | .80 | .20 | 64000 | 32000 | 4000 | .8141 | .1859 | 63302 | 28916 | 3302 | 64000 | 27520 | 4000 | 4480  | 222.57 |



|        |      |     |     |       |       |      |       |       |       |       |      |       |       |      |       |        |
|--------|------|-----|-----|-------|-------|------|-------|-------|-------|-------|------|-------|-------|------|-------|--------|
| 100000 | .87  | .80 | .20 | 64000 | 32000 | 4000 | .8130 | .1870 | 63351 | 29139 | 3351 | 64000 | 27840 | 4000 | 4160  | 190.38 |
| 100000 | .88  | .80 | .20 | 64000 | 32000 | 4000 | .8120 | .1880 | 63399 | 29361 | 3399 | 64000 | 28160 | 4000 | 3840  | 160.94 |
| 100000 | .89  | .80 | .20 | 64000 | 32000 | 4000 | .8109 | .1891 | 63448 | 29583 | 3448 | 64000 | 28480 | 4000 | 3520  | 134.19 |
| 100000 | .90  | .80 | .20 | 64000 | 32000 | 4000 | .8099 | .1901 | 63498 | 29805 | 3498 | 64000 | 28800 | 4000 | 3200  | 110.05 |
| 100000 | .91  | .80 | .20 | 64000 | 32000 | 4000 | .8089 | .1911 | 63547 | 30026 | 3547 | 64000 | 29120 | 4000 | 2880  | 88.47  |
| 100000 | .92  | .80 | .20 | 64000 | 32000 | 4000 | .8079 | .1921 | 63596 | 30247 | 3596 | 64000 | 29440 | 4000 | 2560  | 69.38  |
| 100000 | .93  | .80 | .20 | 64000 | 32000 | 4000 | .8069 | .1931 | 63646 | 30468 | 3646 | 64000 | 29760 | 4000 | 2240  | 52.72  |
| 100000 | .94  | .80 | .20 | 64000 | 32000 | 4000 | .8059 | .1941 | 63696 | 30688 | 3696 | 64000 | 30080 | 4000 | 1920  | 38.45  |
| 100000 | .95  | .80 | .20 | 64000 | 32000 | 4000 | .8049 | .1951 | 63746 | 30907 | 3746 | 64000 | 30400 | 4000 | 1600  | 26.51  |
| 100000 | .96  | .80 | .20 | 64000 | 32000 | 4000 | .8039 | .1961 | 63797 | 31127 | 3797 | 64000 | 30720 | 4000 | 1280  | 16.85  |
| 100000 | .97  | .80 | .20 | 64000 | 32000 | 4000 | .8029 | .1971 | 63847 | 31346 | 3847 | 64000 | 31040 | 4000 | 960   | 9.41   |
| 100000 | .98  | .80 | .20 | 64000 | 32000 | 4000 | .8019 | .1981 | 63898 | 31564 | 3898 | 64000 | 31360 | 4000 | 640   | 4.15   |
| 100000 | .99  | .80 | .20 | 64000 | 32000 | 4000 | .8010 | .1990 | 63949 | 31782 | 3949 | 64000 | 31680 | 4000 | 320   | 1.03   |
| 100000 | 1.00 | .80 | .20 | 64000 | 32000 | 4000 | .8000 | .2000 | 64000 | 32000 | 4000 | 64000 | 32000 | 4000 | 0     | .00    |
| 100000 | 1.01 | .80 | .20 | 64000 | 32000 | 4000 | .7990 | .2010 | 64051 | 32217 | 4051 | 64000 | 32320 | 4000 | -320  | 1.02   |
| 100000 | 1.02 | .80 | .20 | 64000 | 32000 | 4000 | .7981 | .2019 | 64103 | 32434 | 4103 | 64000 | 32640 | 4000 | -640  | 4.04   |
| 100000 | 1.03 | .80 | .20 | 64000 | 32000 | 4000 | .7971 | .2029 | 64154 | 32651 | 4154 | 64000 | 32960 | 4000 | -960  | 9.03   |
| 100000 | 1.04 | .80 | .20 | 64000 | 32000 | 4000 | .7962 | .2038 | 64206 | 32867 | 4206 | 64000 | 33280 | 4000 | -1280 | 15.95  |
| 100000 | 1.05 | .80 | .20 | 64000 | 32000 | 4000 | .7953 | .2047 | 64258 | 33083 | 4258 | 64000 | 33600 | 4000 | -1600 | 24.77  |
| 100000 | 1.06 | .80 | .20 | 64000 | 32000 | 4000 | .7943 | .2057 | 64310 | 33299 | 4310 | 64000 | 33920 | 4000 | -1920 | 35.44  |
| 100000 | 1.07 | .80 | .20 | 64000 | 32000 | 4000 | .7934 | .2066 | 64363 | 33514 | 4363 | 64000 | 34240 | 4000 | -2240 | 47.93  |
| 100000 | 1.08 | .80 | .20 | 64000 | 32000 | 4000 | .7925 | .2075 | 64415 | 33729 | 4415 | 64000 | 34560 | 4000 | -2560 | 62.21  |
| 100000 | 1.09 | .80 | .20 | 64000 | 32000 | 4000 | .7916 | .2084 | 64468 | 33944 | 4468 | 64000 | 34880 | 4000 | -2880 | 78.25  |
| 100000 | 1.10 | .80 | .20 | 64000 | 32000 | 4000 | .7907 | .2093 | 64521 | 34158 | 4521 | 64000 | 35200 | 4000 | -3200 | 96.01  |
| 100000 | 1.11 | .80 | .20 | 64000 | 32000 | 4000 | .7898 | .2102 | 64574 | 34372 | 4574 | 64000 | 35520 | 4000 | -3520 | 115.47 |
| 100000 | 1.12 | .80 | .20 | 64000 | 32000 | 4000 | .7889 | .2111 | 64627 | 34586 | 4627 | 64000 | 35840 | 4000 | -3840 | 136.59 |
| 100000 | 1.13 | .80 | .20 | 64000 | 32000 | 4000 | .7880 | .2120 | 64681 | 34799 | 4681 | 64000 | 36160 | 4000 | -4160 | 159.3  |

|        |      |     |     |       |       |      |       |       |       |       |      |       |       |      |       |        |
|--------|------|-----|-----|-------|-------|------|-------|-------|-------|-------|------|-------|-------|------|-------|--------|
|        |      |     |     |       |       |      |       |       |       |       |      |       |       |      | 5     |        |
| 100000 | 1.14 | .80 | .20 | 64000 | 32000 | 4000 | .7871 | .2129 | 64734 | 35012 | 4734 | 64000 | 36480 | 4000 | -4480 | 183.72 |
| 100000 | 1.15 | .80 | .20 | 64000 | 32000 | 4000 | .7863 | .2137 | 64788 | 35224 | 4788 | 64000 | 36800 | 4000 | -4800 | 209.68 |
| 100000 | 1.16 | .80 | .20 | 64000 | 32000 | 4000 | .7854 | .2146 | 64842 | 35437 | 4842 | 64000 | 37120 | 4000 | -5120 | 237.19 |
| 100000 | 1.17 | .80 | .20 | 64000 | 32000 | 4000 | .7845 | .2155 | 64896 | 35649 | 4896 | 64000 | 37440 | 4000 | -5440 | 266.23 |
| 100000 | 1.18 | .80 | .20 | 64000 | 32000 | 4000 | .7837 | .2163 | 64950 | 35860 | 4950 | 64000 | 37760 | 4000 | -5760 | 296.79 |
| 100000 | 1.19 | .80 | .20 | 64000 | 32000 | 4000 | .7828 | .2172 | 65004 | 36072 | 5004 | 64000 | 38080 | 4000 | -6080 | 328.83 |
| 100000 | 1.20 | .80 | .20 | 64000 | 32000 | 4000 | .7820 | .2180 | 65059 | 36283 | 5059 | 64000 | 38400 | 4000 | -6400 | 362.33 |
| 100000 | .80  | .85 | .15 | 72250 | 25500 | 2250 | .8688 | .1312 | 71633 | 21633 | 1633 | 72250 | 20400 | 2250 | 5100  | 308.46 |
| 100000 | .81  | .85 | .15 | 72250 | 25500 | 2250 | .8678 | .1322 | 71662 | 21830 | 1662 | 72250 | 20655 | 2250 | 4845  | 275.69 |
| 100000 | .82  | .85 | .15 | 72250 | 25500 | 2250 | .8668 | .1332 | 71692 | 22026 | 1692 | 72250 | 20910 | 2250 | 4590  | 245.08 |
| 100000 | .83  | .85 | .15 | 72250 | 25500 | 2250 | .8659 | .1341 | 71721 | 22222 | 1721 | 72250 | 21165 | 2250 | 4335  | 216.56 |
| 100000 | .84  | .85 | .15 | 72250 | 25500 | 2250 | .8649 | .1351 | 71751 | 22418 | 1751 | 72250 | 21420 | 2250 | 4080  | 190.05 |
| 100000 | .85  | .85 | .15 | 72250 | 25500 | 2250 | .8639 | .1361 | 71781 | 22613 | 1781 | 72250 | 21675 | 2250 | 3825  | 165.52 |
| 100000 | .86  | .85 | .15 | 72250 | 25500 | 2250 | .8630 | .1370 | 71811 | 22808 | 1811 | 72250 | 21930 | 2250 | 3570  | 142.89 |
| 100000 | .87  | .85 | .15 | 72250 | 25500 | 2250 | .8620 | .1380 | 71841 | 23002 | 1841 | 72250 | 22185 | 2250 | 3315  | 122.11 |
| 100000 | .88  | .85 | .15 | 72250 | 25500 | 2250 | .8610 | .1390 | 71872 | 23197 | 1872 | 72250 | 22440 | 2250 | 3060  | 103.14 |
| 100000 | .89  | .85 | .15 | 72250 | 25500 | 2250 | .8601 | .1399 | 71902 | 23390 | 1902 | 72250 | 22695 | 2250 | 2805  | 85.92  |

|        |      |     |     |       |       |      |       |       |       |       |      |       |       |      |       |        |
|--------|------|-----|-----|-------|-------|------|-------|-------|-------|-------|------|-------|-------|------|-------|--------|
| 100000 | .90  | .85 | .15 | 72250 | 25500 | 2250 | .8592 | .1408 | 71933 | 23584 | 1933 | 72250 | 22950 | 2250 | 2550  | 70.40  |
| 100000 | .91  | .85 | .15 | 72250 | 25500 | 2250 | .8582 | .1418 | 71964 | 23777 | 1964 | 72250 | 23205 | 2250 | 2295  | 56.55  |
| 100000 | .92  | .85 | .15 | 72250 | 25500 | 2250 | .8573 | .1427 | 71995 | 23970 | 1995 | 72250 | 23460 | 2250 | 2040  | 44.31  |
| 100000 | .93  | .85 | .15 | 72250 | 25500 | 2250 | .8564 | .1436 | 72026 | 24162 | 2026 | 72250 | 23715 | 2250 | 1785  | 33.65  |
| 100000 | .94  | .85 | .15 | 72250 | 25500 | 2250 | .8554 | .1446 | 72058 | 24354 | 2058 | 72250 | 23970 | 2250 | 1530  | 24.52  |
| 100000 | .95  | .85 | .15 | 72250 | 25500 | 2250 | .8545 | .1455 | 72089 | 24546 | 2089 | 72250 | 24225 | 2250 | 1275  | 16.89  |
| 100000 | .96  | .85 | .15 | 72250 | 25500 | 2250 | .8536 | .1464 | 72121 | 24738 | 2121 | 72250 | 24480 | 2250 | 1020  | 10.73  |
| 100000 | .97  | .85 | .15 | 72250 | 25500 | 2250 | .8527 | .1473 | 72153 | 24929 | 2153 | 72250 | 24735 | 2250 | 765   | 5.99   |
| 100000 | .98  | .85 | .15 | 72250 | 25500 | 2250 | .8518 | .1482 | 72185 | 25119 | 2185 | 72250 | 24990 | 2250 | 510   | 2.64   |
| 100000 | .99  | .85 | .15 | 72250 | 25500 | 2250 | .8509 | .1491 | 72218 | 25310 | 2218 | 72250 | 25245 | 2250 | 255   | .66    |
| 100000 | 1.00 | .85 | .15 | 72250 | 25500 | 2250 | .8500 | .1500 | 72250 | 25500 | 2250 | 72250 | 25500 | 2250 | 0     | .00    |
| 100000 | 1.01 | .85 | .15 | 72250 | 25500 | 2250 | .8491 | .1509 | 72283 | 25690 | 2283 | 72250 | 25755 | 2250 | -255  | .65    |
| 100000 | 1.02 | .85 | .15 | 72250 | 25500 | 2250 | .8482 | .1518 | 72315 | 25879 | 2315 | 72250 | 26010 | 2250 | -510  | 2.56   |
| 100000 | 1.03 | .85 | .15 | 72250 | 25500 | 2250 | .8473 | .1527 | 72348 | 26069 | 2348 | 72250 | 26265 | 2250 | -765  | 5.73   |
| 100000 | 1.04 | .85 | .15 | 72250 | 25500 | 2250 | .8465 | .1535 | 72381 | 26257 | 2381 | 72250 | 26520 | 2250 | -1020 | 10.11  |
| 100000 | 1.05 | .85 | .15 | 72250 | 25500 | 2250 | .8456 | .1544 | 72415 | 26446 | 2415 | 72250 | 26775 | 2250 | -1275 | 15.68  |
| 100000 | 1.06 | .85 | .15 | 72250 | 25500 | 2250 | .8447 | .1553 | 72448 | 26634 | 2448 | 72250 | 27030 | 2250 | -1530 | 22.42  |
| 100000 | 1.07 | .85 | .15 | 72250 | 25500 | 2250 | .8439 | .1561 | 72481 | 26822 | 2481 | 72250 | 27285 | 2250 | -1785 | 30.31  |
| 100000 | 1.08 | .85 | .15 | 72250 | 25500 | 2250 | .8430 | .1570 | 72515 | 27010 | 2515 | 72250 | 27540 | 2250 | -2040 | 39.32  |
| 100000 | 1.09 | .85 | .15 | 72250 | 25500 | 2250 | .8421 | .1579 | 72549 | 27197 | 2549 | 72250 | 27795 | 2250 | -2295 | 49.43  |
| 100000 | 1.10 | .85 | .15 | 72250 | 25500 | 2250 | .8413 | .1587 | 72583 | 27384 | 2583 | 72250 | 28050 | 2250 | -2550 | 60.62  |
| 100000 | 1.11 | .85 | .15 | 72250 | 25500 | 2250 | .8405 | .1595 | 72617 | 27571 | 2617 | 72250 | 28305 | 2250 | -2805 | 72.87  |
| 100000 | 1.12 | .85 | .15 | 72250 | 25500 | 2250 | .8396 | .1604 | 72651 | 27757 | 2651 | 72250 | 28560 | 2250 | -3060 | 86.16  |
| 100000 | 1.13 | .85 | .15 | 72250 | 25500 | 2250 | .8388 | .1612 | 72686 | 27944 | 2686 | 72250 | 28815 | 2250 | -3315 | 100.47 |
| 100000 | 1.14 | .85 | .15 | 72250 | 25500 | 2250 | .8379 | .1621 | 72720 | 28130 | 2720 | 72250 | 29070 | 2250 | -3570 | 115.78 |
| 100000 | 1.15 | .85 | .15 | 72250 | 25500 | 2250 | .8371 | .1629 | 72755 | 28315 | 2755 | 72250 | 29325 | 2250 | -3825 | 132.08 |
| 100000 | 1.16 | .85 | .15 | 72250 | 25500 | 2250 | .8363 | .1637 | 72790 | 28500 | 2790 | 72250 | 29580 | 2250 | -4080 | 149.34 |
| 100000 | 1.17 | .85 | .15 | 72250 | 25500 | 2250 | .8355 | .1645 | 72825 | 28685 | 2825 | 72250 | 29835 | 2250 | -4335 | 167.56 |

|        |      |     |     |       |       |      |       |       |       |       |      |       |       |      |       |        |
|--------|------|-----|-----|-------|-------|------|-------|-------|-------|-------|------|-------|-------|------|-------|--------|
| 100000 | 1.18 | .85 | .15 | 72250 | 25500 | 2250 | .8346 | .1654 | 72860 | 28870 | 2860 | 72250 | 30090 | 2250 | -4590 | 186.71 |
| 100000 | 1.19 | .85 | .15 | 72250 | 25500 | 2250 | .8338 | .1662 | 72895 | 29055 | 2895 | 72250 | 30345 | 2250 | -4845 | 206.78 |
| 100000 | 1.20 | .85 | .15 | 72250 | 25500 | 2250 | .8330 | .1670 | 72931 | 29239 | 2931 | 72250 | 30600 | 2250 | -5100 | 227.76 |
| 100000 | .80  | .90 | .10 | 81000 | 18000 | 1000 | .9149 | .0851 | 80698 | 15005 | 698  | 81000 | 14400 | 1000 | 3600  | 156.71 |
| 100000 | .81  | .90 | .10 | 81000 | 18000 | 1000 | .9142 | .0858 | 80712 | 15157 | 712  | 81000 | 14580 | 1000 | 3420  | 139.89 |
| 100000 | .82  | .90 | .10 | 81000 | 18000 | 1000 | .9134 | .0866 | 80726 | 15308 | 726  | 81000 | 14760 | 1000 | 3240  | 124.21 |
| 100000 | .83  | .90 | .10 | 81000 | 18000 | 1000 | .9126 | .0874 | 80740 | 15460 | 740  | 81000 | 14940 | 1000 | 3060  | 109.63 |
| 100000 | .84  | .90 | .10 | 81000 | 18000 | 1000 | .9119 | .0881 | 80754 | 15611 | 754  | 81000 | 15120 | 1000 | 2880  | 96.10  |
| 100000 | .85  | .90 | .10 | 81000 | 18000 | 1000 | .9111 | .0889 | 80769 | 15762 | 769  | 81000 | 15300 | 1000 | 2700  | 83.60  |
| 100000 | .86  | .90 | .10 | 81000 | 18000 | 1000 | .9103 | .0897 | 80784 | 15913 | 784  | 81000 | 15480 | 1000 | 2520  | 72.10  |
| 100000 | .87  | .90 | .10 | 81000 | 18000 | 1000 | .9096 | .0904 | 80798 | 16063 | 798  | 81000 | 15660 | 1000 | 2340  | 61.55  |
| 100000 | .88  | .90 | .10 | 81000 | 18000 | 1000 | .9088 | .0912 | 80813 | 16214 | 813  | 81000 | 15840 | 1000 | 2160  | 51.93  |
| 100000 | .89  | .90 | .10 | 81000 | 18000 | 1000 | .9081 | .0919 | 80828 | 16364 | 828  | 81000 | 16020 | 1000 | 1980  | 43.22  |
| 100000 | .90  | .90 | .10 | 81000 | 18000 | 1000 | .9073 | .0927 | 80843 | 16513 | 843  | 81000 | 16200 | 1000 | 1800  | 35.38  |
| 100000 | .91  | .90 | .10 | 81000 | 18000 | 1000 | .9066 | .0934 | 80858 | 16663 | 858  | 81000 | 16380 | 1000 | 1620  | 28.39  |
| 100000 | .92  | .90 | .10 | 81000 | 18000 | 1000 | .9058 | .0942 | 80874 | 16812 | 874  | 81000 | 16560 | 1000 | 1440  | 22.23  |
| 100000 | .93  | .90 | .10 | 81000 | 18000 | 1000 | .9051 | .0949 | 80889 | 16962 | 889  | 81000 | 16740 | 1000 | 1260  | 16.86  |
| 100000 | .94  | .90 | .10 | 81000 | 18000 | 1000 | .9044 | .0956 | 80905 | 17111 | 905  | 81000 | 16920 | 1000 | 1080  | 12.28  |
| 100000 | .95  | .90 | .10 | 81000 | 18000 | 1000 | .9036 | .0964 | 80920 | 17259 | 920  | 81000 | 17100 | 1000 | 900   | 8.45   |
| 100000 | .96  | .90 | .10 | 81000 | 18000 | 1000 | .9029 | .0971 | 80936 | 17408 | 936  | 81000 | 17280 | 1000 | 720   | 5.36   |
| 100000 | .97  | .90 | .10 | 81000 | 18000 | 1000 | .9022 | .0978 | 80952 | 17556 | 952  | 81000 | 17460 | 1000 | 540   | 2.99   |
| 100000 | .98  | .90 | .10 | 81000 | 18000 | 1000 | .9014 | .0986 | 80968 | 17704 | 968  | 81000 | 17640 | 1000 | 360   | 1.32   |
| 100000 | .99  | .90 | .10 | 81000 | 18000 | 1000 | .9007 | .0993 | 80984 | 17852 | 984  | 81000 | 17820 | 1000 | 180   | .33    |
| 100000 | 1.00 | .90 | .10 | 81000 | 18000 | 1000 | .9000 | .1000 | 81000 | 18000 | 1000 | 81000 | 18000 | 1000 | 0     | .00    |
| 100000 | 1.01 | .90 | .10 | 81000 | 18000 | 1000 | .8993 | .1007 | 81016 | 18147 | 1016 | 81000 | 18180 | 1000 | -180  | .32    |
| 100000 | 1.02 | .90 | .10 | 81000 | 18000 | 1000 | .8986 | .1014 | 81033 | 18295 | 1033 | 81000 | 18360 | 1000 | -360  | 1.28   |

|        |      |     |     |       |       |      |       |       |       |       |      |       |       |      |       |        |
|--------|------|-----|-----|-------|-------|------|-------|-------|-------|-------|------|-------|-------|------|-------|--------|
| 100000 | 1.03 | .90 | .10 | 81000 | 18000 | 1000 | .8979 | .1021 | 81049 | 18442 | 1049 | 81000 | 18540 | 1000 | -540  | 2.85   |
| 100000 | 1.04 | .90 | .10 | 81000 | 18000 | 1000 | .8971 | .1029 | 81066 | 18589 | 1066 | 81000 | 18720 | 1000 | -720  | 5.02   |
| 100000 | 1.05 | .90 | .10 | 81000 | 18000 | 1000 | .8964 | .1036 | 81082 | 18735 | 1082 | 81000 | 18900 | 1000 | -900  | 7.79   |
| 100000 | 1.06 | .90 | .10 | 81000 | 18000 | 1000 | .8957 | .1043 | 81099 | 18882 | 1099 | 81000 | 19080 | 1000 | -1080 | 11.13  |
| 100000 | 1.07 | .90 | .10 | 81000 | 18000 | 1000 | .8950 | .1050 | 81116 | 19028 | 1116 | 81000 | 19260 | 1000 | -1260 | 15.03  |
| 100000 | 1.08 | .90 | .10 | 81000 | 18000 | 1000 | .8943 | .1057 | 81133 | 19174 | 1133 | 81000 | 19440 | 1000 | -1440 | 19.48  |
| 100000 | 1.09 | .90 | .10 | 81000 | 18000 | 1000 | .8936 | .1064 | 81150 | 19320 | 1150 | 81000 | 19620 | 1000 | -1620 | 24.48  |
| 100000 | 1.10 | .90 | .10 | 81000 | 18000 | 1000 | .8929 | .1071 | 81167 | 19466 | 1167 | 81000 | 19800 | 1000 | -1800 | 30.00  |
| 100000 | 1.11 | .90 | .10 | 81000 | 18000 | 1000 | .8922 | .1078 | 81184 | 19611 | 1184 | 81000 | 19980 | 1000 | -1980 | 36.05  |
| 100000 | 1.12 | .90 | .10 | 81000 | 18000 | 1000 | .8915 | .1085 | 81202 | 19757 | 1202 | 81000 | 20160 | 1000 | -2160 | 42.60  |
| 100000 | 1.13 | .90 | .10 | 81000 | 18000 | 1000 | .8909 | .1091 | 81219 | 19902 | 1219 | 81000 | 20340 | 1000 | -2340 | 49.64  |
| 100000 | 1.14 | .90 | .10 | 81000 | 18000 | 1000 | .8902 | .1098 | 81237 | 20047 | 1237 | 81000 | 20520 | 1000 | -2520 | 57.18  |
| 100000 | 1.15 | .90 | .10 | 81000 | 18000 | 1000 | .8895 | .1105 | 81254 | 20191 | 1254 | 81000 | 20700 | 1000 | -2700 | 65.19  |
| 100000 | 1.16 | .90 | .10 | 81000 | 18000 | 1000 | .8888 | .1112 | 81272 | 20336 | 1272 | 81000 | 20880 | 1000 | -2880 | 73.68  |
| 100000 | 1.17 | .90 | .10 | 81000 | 18000 | 1000 | .8881 | .1119 | 81290 | 20480 | 1290 | 81000 | 21060 | 1000 | -3060 | 82.62  |
| 100000 | 1.18 | .90 | .10 | 81000 | 18000 | 1000 | .8874 | .1126 | 81308 | 20624 | 1308 | 81000 | 21240 | 1000 | -3240 | 92.02  |
| 100000 | 1.19 | .90 | .10 | 81000 | 18000 | 1000 | .8868 | .1132 | 81326 | 20768 | 1326 | 81000 | 21420 | 1000 | -3420 | 101.86 |
| 100000 | 1.20 | .90 | .10 | 81000 | 18000 | 1000 | .8861 | .1139 | 81344 | 20912 | 1344 | 81000 | 21600 | 1000 | -3600 | 112.15 |
| 100000 | .80  | .95 | .05 | 90250 | 9500  | 250  | .9587 | .0413 | 90167 | 7766  | 167  | 90250 | 7600  | 250  | 1900  | 44.61  |
| 100000 | .81  | .95 | .05 | 90250 | 9500  | 250  | .9583 | .0417 | 90171 | 7853  | 171  | 90250 | 7695  | 250  | 1805  | 39.77  |
| 100000 | .82  | .95 | .05 | 90250 | 9500  | 250  | .9578 | .0422 | 90175 | 7940  | 175  | 90250 | 7790  | 250  | 1710  | 35.26  |
| 100000 | .83  | .95 | .05 | 90250 | 9500  | 250  | .9574 | .0426 | 90179 | 8028  | 179  | 90250 | 7885  | 250  | 1615  | 31.08  |
| 100000 | .84  | .95 | .05 | 90250 | 9500  | 250  | .9569 | .0431 | 90183 | 8115  | 183  | 90250 | 7980  | 250  | 1520  | 27.21  |
| 100000 | .85  | .95 | .05 | 90250 | 9500  | 250  | .9565 | .0435 | 90186 | 8202  | 186  | 90250 | 8075  | 250  | 1425  | 23.65  |
| 100000 | .86  | .95 | .05 | 90250 | 9500  | 250  | .9561 | .0439 | 90190 | 8289  | 190  | 90250 | 8170  | 250  | 1330  | 20.37  |
| 100000 | .87  | .95 | .05 | 90250 | 9500  | 250  | .9556 | .0444 | 90194 | 8376  | 194  | 90250 | 8265  | 250  | 1235  | 17.37  |
| 100000 | .88  | .95 | .05 | 90250 | 9500  | 250  | .9552 | .0448 | 90199 | 8463  | 199  | 90250 | 8360  | 250  | 1140  | 14.64  |
| 100000 | .89  | .95 | .05 | 90250 | 9500  | 250  | .9548 | .0452 | 90203 | 8550  | 203  | 90250 | 8455  | 250  | 1045  | 12.17  |
| 100000 | .90  | .95 | .05 | 90250 | 9500  | 250  | .9543 | .0457 | 90207 | 8637  | 207  | 90250 | 8550  | 250  | 950   | 9.95   |
| 100000 | .91  | .95 | .05 | 90250 | 9500  | 250  | .9539 | .0461 | 90211 | 8723  | 211  | 90250 | 8645  | 250  | 855   | 7.98   |
| 100000 | .92  | .95 | .05 | 90250 | 9500  | 250  | .9534 | .0466 | 90215 | 8810  | 215  | 90250 | 8740  | 250  | 760   | 6.24   |

|        |      |      |     |        |      |     |            |       |        |       |     |        |       |     |       |       |
|--------|------|------|-----|--------|------|-----|------------|-------|--------|-------|-----|--------|-------|-----|-------|-------|
| 100000 | .93  | .95  | .05 | 90250  | 9500 | 250 | .9530      | .0470 | 90219  | 8896  | 219 | 90250  | 8835  | 250 | 665   | 4.73  |
| 100000 | .94  | .95  | .05 | 90250  | 9500 | 250 | .9526      | .0474 | 90224  | 8983  | 224 | 90250  | 8930  | 250 | 570   | 3.44  |
| 100000 | .95  | .95  | .05 | 90250  | 9500 | 250 | .9521      | .0479 | 90228  | 9069  | 228 | 90250  | 9025  | 250 | 475   | 2.36  |
| 100000 | .96  | .95  | .05 | 90250  | 9500 | 250 | .9517      | .0483 | 90232  | 9156  | 232 | 90250  | 9120  | 250 | 380   | 1.50  |
| 100000 | .97  | .95  | .05 | 90250  | 9500 | 250 | .9513      | .0487 | 90237  | 9242  | 237 | 90250  | 9215  | 250 | 285   | .84   |
| 100000 | .98  | .95  | .05 | 90250  | 9500 | 250 | .9509      | .0491 | 90241  | 9328  | 241 | 90250  | 9310  | 250 | 190   | .37   |
| 100000 | .99  | .95  | .05 | 90250  | 9500 | 250 | .9504      | .0496 | 90246  | 9414  | 246 | 90250  | 9405  | 250 | 95    | .09   |
| 100000 | 1.00 | .95  | .05 | 90250  | 9500 | 250 | .9500      | .0500 | 90250  | 9500  | 250 | 90250  | 9500  | 250 | 0     | .00   |
| 100000 | 1.01 | .95  | .05 | 90250  | 9500 | 250 | .9496      | .0504 | 90255  | 9586  | 255 | 90250  | 9595  | 250 | -95   | .09   |
| 100000 | 1.02 | .95  | .05 | 90250  | 9500 | 250 | .9491      | .0509 | 90259  | 9672  | 259 | 90250  | 9690  | 250 | -190  | .35   |
| 100000 | 1.03 | .95  | .05 | 90250  | 9500 | 250 | .9487      | .0513 | 90264  | 9758  | 264 | 90250  | 9785  | 250 | -285  | .79   |
| 100000 | 1.04 | .95  | .05 | 90250  | 9500 | 250 | .9483      | .0517 | 90268  | 9843  | 268 | 90250  | 9880  | 250 | -380  | 1.39  |
| 100000 | 1.05 | .95  | .05 | 90250  | 9500 | 250 | .9479      | .0521 | 90273  | 9929  | 273 | 90250  | 9975  | 250 | -475  | 2.16  |
| 100000 | 1.06 | .95  | .05 | 90250  | 9500 | 250 | .9474      | .0526 | 90278  | 10015 | 278 | 90250  | 10070 | 250 | -570  | 3.08  |
| 100000 | 1.07 | .95  | .05 | 90250  | 9500 | 250 | .9470      | .0530 | 90282  | 10100 | 282 | 90250  | 10165 | 250 | -665  | 4.16  |
| 100000 | 1.08 | .95  | .05 | 90250  | 9500 | 250 | .9466      | .0534 | 90287  | 10185 | 287 | 90250  | 10260 | 250 | -760  | 5.39  |
| 100000 | 1.09 | .95  | .05 | 90250  | 9500 | 250 | .9462      | .0538 | 90292  | 10271 | 292 | 90250  | 10355 | 250 | -855  | 6.77  |
| 100000 | 1.10 | .95  | .05 | 90250  | 9500 | 250 | .9458      | .0542 | 90297  | 10356 | 297 | 90250  | 10450 | 250 | -950  | 8.29  |
| 100000 | 1.11 | .95  | .05 | 90250  | 9500 | 250 | .9453      | .0547 | 90302  | 10441 | 302 | 90250  | 10545 | 250 | -1045 | 9.96  |
| 100000 | 1.12 | .95  | .05 | 90250  | 9500 | 250 | .9449      | .0551 | 90307  | 10526 | 307 | 90250  | 10640 | 250 | -1140 | 11.76 |
| 100000 | 1.13 | .95  | .05 | 90250  | 9500 | 250 | .9445      | .0555 | 90312  | 10612 | 312 | 90250  | 10735 | 250 | -1235 | 13.70 |
| 100000 | 1.14 | .95  | .05 | 90250  | 9500 | 250 | .9441      | .0559 | 90317  | 10697 | 317 | 90250  | 10830 | 250 | -1330 | 15.76 |
| 100000 | 1.15 | .95  | .05 | 90250  | 9500 | 250 | .9437      | .0563 | 90322  | 10782 | 322 | 90250  | 10925 | 250 | -1425 | 17.96 |
| 100000 | 1.16 | .95  | .05 | 90250  | 9500 | 250 | .9433      | .0567 | 90327  | 10866 | 327 | 90250  | 11020 | 250 | -1520 | 20.29 |
| 100000 | 1.17 | .95  | .05 | 90250  | 9500 | 250 | .9428      | .0572 | 90332  | 10951 | 332 | 90250  | 11115 | 250 | -1615 | 22.74 |
| 100000 | 1.18 | .95  | .05 | 90250  | 9500 | 250 | .9424      | .0576 | 90337  | 11036 | 337 | 90250  | 11210 | 250 | -1710 | 25.31 |
| 100000 | 1.19 | .95  | .05 | 90250  | 9500 | 250 | .9420      | .0580 | 90342  | 11121 | 342 | 90250  | 11305 | 250 | -1805 | 28.00 |
| 100000 | 1.20 | .95  | .05 | 90250  | 9500 | 250 | .9416      | .0584 | 90347  | 11205 | 347 | 90250  | 11400 | 250 | -1900 | 30.81 |
| 100000 | .80  | 1.00 | .00 | 100000 | 0    | 0   | 1.000<br>0 | .0000 | 100000 | 0     | 0   | 100000 | 0     | 0   | 0     | 30.81 |
| 100000 | .81  | 1.00 | .00 | 100000 | 0    | 0   | 1.000<br>0 | .0000 | 100000 | 0     | 0   | 100000 | 0     | 0   | 0     | 30.81 |
| 100000 | .82  | 1.00 | .00 | 100000 | 0    | 0   | 1.000      | .0000 | 100000 | 0     | 0   | 100000 | 0     | 0   | 0     | 30.81 |

|        |     |      |     |        |   |   |           |       |        |   |   |        |   |   |   |       |
|--------|-----|------|-----|--------|---|---|-----------|-------|--------|---|---|--------|---|---|---|-------|
|        |     |      |     |        |   |   | 0         |       |        |   |   |        |   |   |   |       |
| 100000 | .83 | 1.00 | .00 | 100000 | 0 | 0 | 1.00<br>0 | .0000 | 100000 | 0 | 0 | 100000 | 0 | 0 | 0 | 30.81 |
| 100000 | .84 | 1.00 | .00 | 100000 | 0 | 0 | 1.00<br>0 | .0000 | 100000 | 0 | 0 | 100000 | 0 | 0 | 0 | 30.81 |
| 100000 | .85 | 1.00 | .00 | 100000 | 0 | 0 | 1.00<br>0 | .0000 | 100000 | 0 | 0 | 100000 | 0 | 0 | 0 | 30.81 |
| 100000 | .86 | 1.00 | .00 | 100000 | 0 | 0 | 1.00<br>0 | .0000 | 100000 | 0 | 0 | 100000 | 0 | 0 | 0 | 30.81 |
| 100000 | .87 | 1.00 | .00 | 100000 | 0 | 0 | 1.00<br>0 | .0000 | 100000 | 0 | 0 | 100000 | 0 | 0 | 0 | 30.81 |
| 100000 | .88 | 1.00 | .00 | 100000 | 0 | 0 | 1.00<br>0 | .0000 | 100000 | 0 | 0 | 100000 | 0 | 0 | 0 | 30.81 |
| 100000 | .89 | 1.00 | .00 | 100000 | 0 | 0 | 1.00<br>0 | .0000 | 100000 | 0 | 0 | 100000 | 0 | 0 | 0 | 30.81 |
| 100000 | .90 | 1.00 | .00 | 100000 | 0 | 0 | 1.00<br>0 | .0000 | 100000 | 0 | 0 | 100000 | 0 | 0 | 0 | 30.81 |
| 100000 | .91 | 1.00 | .00 | 100000 | 0 | 0 | 1.00<br>0 | .0000 | 100000 | 0 | 0 | 100000 | 0 | 0 | 0 | 30.81 |
| 100000 | .92 | 1.00 | .00 | 100000 | 0 | 0 | 1.00<br>0 | .0000 | 100000 | 0 | 0 | 100000 | 0 | 0 | 0 | 30.81 |
| 100000 | .93 | 1.00 | .00 | 100000 | 0 | 0 | 1.00<br>0 | .0000 | 100000 | 0 | 0 | 100000 | 0 | 0 | 0 | 30.81 |
| 100000 | .94 | 1.00 | .00 | 100000 | 0 | 0 | 1.00<br>0 | .0000 | 100000 | 0 | 0 | 100000 | 0 | 0 | 0 | 30.81 |
| 100000 | .95 | 1.00 | .00 | 100000 | 0 | 0 | 1.00<br>0 | .0000 | 100000 | 0 | 0 | 100000 | 0 | 0 | 0 | 30.81 |
| 100000 | .96 | 1.00 | .00 | 100000 | 0 | 0 | 1.00<br>0 | .0000 | 100000 | 0 | 0 | 100000 | 0 | 0 | 0 | 30.81 |
| 100000 | .97 | 1.00 | .00 | 100000 | 0 | 0 | 1.00<br>0 | .0000 | 100000 | 0 | 0 | 100000 | 0 | 0 | 0 | 30.81 |
| 100000 | .98 | 1.00 | .00 | 100000 | 0 | 0 | 1.00<br>0 | .0000 | 100000 | 0 | 0 | 100000 | 0 | 0 | 0 | 30.81 |
| 100000 | .99 | 1.00 | .00 | 100000 | 0 | 0 | 1.00      | .0000 | 100000 | 0 | 0 | 100000 | 0 | 0 | 0 | 30.81 |

|        |      |      |     |        |   |   |           |       |        |   |   |        |   |   |   |       |
|--------|------|------|-----|--------|---|---|-----------|-------|--------|---|---|--------|---|---|---|-------|
|        |      |      |     |        |   |   | 0         |       |        |   |   |        |   |   |   |       |
| 100000 | 1.00 | 1.00 | .00 | 100000 | 0 | 0 | 1.00<br>0 | .0000 | 100000 | 0 | 0 | 100000 | 0 | 0 | 0 | 30.81 |
| 100000 | 1.01 | 1.00 | .00 | 100000 | 0 | 0 | 1.00<br>0 | .0000 | 100000 | 0 | 0 | 100000 | 0 | 0 | 0 | 30.81 |
| 100000 | 1.02 | 1.00 | .00 | 100000 | 0 | 0 | 1.00<br>0 | .0000 | 100000 | 0 | 0 | 100000 | 0 | 0 | 0 | 30.81 |
| 100000 | 1.03 | 1.00 | .00 | 100000 | 0 | 0 | 1.00<br>0 | .0000 | 100000 | 0 | 0 | 100000 | 0 | 0 | 0 | 30.81 |
| 100000 | 1.04 | 1.00 | .00 | 100000 | 0 | 0 | 1.00<br>0 | .0000 | 100000 | 0 | 0 | 100000 | 0 | 0 | 0 | 30.81 |
| 100000 | 1.05 | 1.00 | .00 | 100000 | 0 | 0 | 1.00<br>0 | .0000 | 100000 | 0 | 0 | 100000 | 0 | 0 | 0 | 30.81 |
| 100000 | 1.06 | 1.00 | .00 | 100000 | 0 | 0 | 1.00<br>0 | .0000 | 100000 | 0 | 0 | 100000 | 0 | 0 | 0 | 30.81 |
| 100000 | 1.07 | 1.00 | .00 | 100000 | 0 | 0 | 1.00<br>0 | .0000 | 100000 | 0 | 0 | 100000 | 0 | 0 | 0 | 30.81 |
| 100000 | 1.08 | 1.00 | .00 | 100000 | 0 | 0 | 1.00<br>0 | .0000 | 100000 | 0 | 0 | 100000 | 0 | 0 | 0 | 30.81 |
| 100000 | 1.09 | 1.00 | .00 | 100000 | 0 | 0 | 1.00<br>0 | .0000 | 100000 | 0 | 0 | 100000 | 0 | 0 | 0 | 30.81 |
| 100000 | 1.10 | 1.00 | .00 | 100000 | 0 | 0 | 1.00<br>0 | .0000 | 100000 | 0 | 0 | 100000 | 0 | 0 | 0 | 30.81 |
| 100000 | 1.11 | 1.00 | .00 | 100000 | 0 | 0 | 1.00<br>0 | .0000 | 100000 | 0 | 0 | 100000 | 0 | 0 | 0 | 30.81 |
| 100000 | 1.12 | 1.00 | .00 | 100000 | 0 | 0 | 1.00<br>0 | .0000 | 100000 | 0 | 0 | 100000 | 0 | 0 | 0 | 30.81 |
| 100000 | 1.13 | 1.00 | .00 | 100000 | 0 | 0 | 1.00<br>0 | .0000 | 100000 | 0 | 0 | 100000 | 0 | 0 | 0 | 30.81 |
| 100000 | 1.14 | 1.00 | .00 | 100000 | 0 | 0 | 1.00<br>0 | .0000 | 100000 | 0 | 0 | 100000 | 0 | 0 | 0 | 30.81 |
| 100000 | 1.15 | 1.00 | .00 | 100000 | 0 | 0 | 1.00<br>0 | .0000 | 100000 | 0 | 0 | 100000 | 0 | 0 | 0 | 30.81 |
| 100000 | 1.16 | 1.00 | .00 | 100000 | 0 | 0 | 1.00      | .0000 | 100000 | 0 | 0 | 100000 | 0 | 0 | 0 | 30.81 |



|        |      |      |     |        |   |   |            |       |        |   |   |        |   |   |   |       |
|--------|------|------|-----|--------|---|---|------------|-------|--------|---|---|--------|---|---|---|-------|
|        |      |      |     |        |   |   | 0          |       |        |   |   |        |   |   |   |       |
| 100000 | 1.17 | 1.00 | .00 | 100000 | 0 | 0 | 1.000<br>0 | .0000 | 100000 | 0 | 0 | 100000 | 0 | 0 | 0 | 30.81 |
| 100000 | 1.18 | 1.00 | .00 | 100000 | 0 | 0 | 1.000<br>0 | .0000 | 100000 | 0 | 0 | 100000 | 0 | 0 | 0 | 30.81 |
| 100000 | 1.19 | 1.00 | .00 | 100000 | 0 | 0 | 1.000<br>0 | .0000 | 100000 | 0 | 0 | 100000 | 0 | 0 | 0 | 30.81 |
| 100000 | 1.20 | 1.00 | .00 | 100000 | 0 | 0 | 1.000<br>0 | .0000 | 100000 | 0 | 0 | 100000 | 0 | 0 | 0 | 30.81 |
