# Supplementary material for: Hardy-Weinberg Equilibrium Testing of Biological Ascertainment for Mendelian Randomization Studies
Source: PubMed Central journal article supplement — Am J Epidemiol. 2009 Jan 6;169(4):505–14. doi: 10.1093/aje/kwn359 (PMC2640163; doi:10.1093/aje/kwn359), 2009-01-06
Supplement: kwn359_9.pdf [file kwn359_9.pdf]

Web Table 7. Deviations from Hardy Weinberg Equilibrium computed from the 95% CI bounds of allele frequency for sample sizes of 5000, 10000, 20000, 50000 and 100000, and for starting allele frequencies from 0.05 to 0.95 (with increments of 0.05).  $p_{true}$  and  $q_{true}$  are the allele frequencies used to start the computations. We consider here  $\chi^2 = 0$  (perfect HWE).  $\chi^2$  (low CI) and  $\chi^2$  (high CI) are the HWE  $\chi^2$  values for the allele frequencies defined by the low bound of the 95% CI and by the high bound of the 95% CI, respectively. Also shown are the expected counts for each genotype group computed by the low and high bounds of the 95% CI.

| N     | $p_{true}$ | $q_{true}$ | Hz1<br>Obs | Het<br>Obs | Hz2<br>Obs | $\chi^2$ | LowCI p | HighCI p | LowCI q | HighCI q | Hz1 Exp<br>(lowCI) | Het Exp<br>(lowCI) | Hz1 Exp<br>(low CI) | Hz1 Exp<br>(high CI) | Het Exp<br>(high CI) | Hz2Exp<br>(high CI) | $\chi^2$<br>(low CI) | $\chi^2$<br>(high CI) |
|-------|------------|------------|------------|------------|------------|----------|---------|----------|---------|----------|--------------------|--------------------|---------------------|----------------------|----------------------|---------------------|----------------------|-----------------------|
| 5000  | 0.05       | 0.95       | 13         | 475        | 4513       | 0        | 0.0457  | 0.0543   | 0.9457  | 0.9543   | 10                 | 436                | 4553                | 15                   | 513                  | 4472                | 4.18                 | 3.56                  |
| 5000  | 0.10       | 0.90       | 50         | 900        | 4050       | 0        | 0.0941  | 0.1059   | 0.8941  | 0.9059   | 44                 | 853                | 4103                | 56                   | 947                  | 3997                | 4.06                 | 3.65                  |
| 5000  | 0.15       | 0.85       | 113        | 1275       | 3613       | 0        | 0.1430  | 0.1570   | 0.8430  | 0.8570   | 102                | 1226               | 3672                | 123                  | 1324                 | 3553                | 4.00                 | 3.70                  |
| 5000  | 0.20       | 0.80       | 200        | 1600       | 3200       | 0        | 0.1922  | 0.2078   | 0.7922  | 0.8078   | 185                | 1552               | 3263                | 216                  | 1646                 | 3138                | 3.96                 | 3.73                  |
| 5000  | 0.25       | 0.75       | 313        | 1875       | 2813       | 0        | 0.2415  | 0.2585   | 0.7415  | 0.7585   | 292                | 1832               | 2877                | 334                  | 1917                 | 2749                | 3.93                 | 3.76                  |
| 5000  | 0.30       | 0.70       | 450        | 2100       | 2450       | 0        | 0.2910  | 0.3090   | 0.6910  | 0.7090   | 423                | 2063               | 2513                | 477                  | 2135                 | 2388                | 3.91                 | 3.78                  |
| 5000  | 0.35       | 0.65       | 613        | 2275       | 2113       | 0        | 0.3407  | 0.3593   | 0.6407  | 0.6593   | 580                | 2246               | 2174                | 646                  | 2302                 | 2052                | 3.89                 | 3.80                  |
| 5000  | 0.40       | 0.60       | 800        | 2400       | 1800       | 0        | 0.3904  | 0.4096   | 0.5904  | 0.6096   | 762                | 2380               | 1858                | 839                  | 2418                 | 1743                | 3.87                 | 3.81                  |
| 5000  | 0.45       | 0.55       | 1013       | 2475       | 1513       | 0        | 0.4402  | 0.4598   | 0.5402  | 0.5598   | 969                | 2464               | 1567                | 1057                 | 2484                 | 1459                | 3.86                 | 3.83                  |
| 5000  | 0.50       | 0.50       | 1250       | 2500       | 1250       | 0        | 0.4902  | 0.5098   | 0.4902  | 0.5098   | 1201               | 2499               | 1299                | 1299                 | 2499                 | 1201                | 3.84                 | 3.84                  |
| 5000  | 0.55       | 0.45       | 1513       | 2475       | 1013       | 0        | 0.5402  | 0.5598   | 0.4402  | 0.4598   | 1459               | 2484               | 1057                | 1567                 | 2464                 | 969                 | 3.83                 | 3.86                  |
| 5000  | 0.60       | 0.40       | 1800       | 2400       | 800        | 0        | 0.5904  | 0.6096   | 0.3904  | 0.4096   | 1743               | 2418               | 839                 | 1858                 | 2380                 | 762                 | 3.81                 | 3.87                  |
| 5000  | 0.65       | 0.35       | 2113       | 2275       | 613        | 0        | 0.6407  | 0.6593   | 0.3407  | 0.3593   | 2052               | 2302               | 646                 | 2174                 | 2246                 | 580                 | 3.80                 | 3.89                  |
| 5000  | 0.70       | 0.30       | 2450       | 2100       | 450        | 0        | 0.6910  | 0.7090   | 0.2910  | 0.3090   | 2388               | 2135               | 477                 | 2513                 | 2063                 | 423                 | 3.78                 | 3.91                  |
| 5000  | 0.75       | 0.25       | 2813       | 1875       | 313        | 0        | 0.7415  | 0.7585   | 0.2415  | 0.2585   | 2749               | 1917               | 334                 | 2877                 | 1832                 | 292                 | 3.76                 | 3.93                  |
| 5000  | 0.80       | 0.20       | 3200       | 1600       | 200        | 0        | 0.7922  | 0.8078   | 0.1922  | 0.2078   | 3138               | 1646               | 216                 | 3263                 | 1552                 | 185                 | 3.73                 | 3.96                  |
| 5000  | 0.85       | 0.15       | 3613       | 1275       | 113        | 0        | 0.8430  | 0.8570   | 0.1430  | 0.1570   | 3553               | 1324               | 123                 | 3672                 | 1226                 | 102                 | 3.70                 | 4.00                  |
| 5000  | 0.90       | 0.10       | 4050       | 900        | 50         | 0        | 0.8941  | 0.9059   | 0.0941  | 0.1059   | 3997               | 947                | 56                  | 4103                 | 853                  | 44                  | 3.65                 | 4.06                  |
| 5000  | 0.95       | 0.05       | 4513       | 475        | 13         | 0        | 0.9457  | 0.9543   | 0.0457  | 0.0543   | 4472               | 513                | 15                  | 4553                 | 436                  | 10                  | 3.56                 | 4.18                  |
| 10000 | 0.05       | 0.95       | 25         | 950        | 9025       | 0        | 0.0470  | 0.0530   | 0.9470  | 0.9530   | 22                 | 895                | 9082                | 28                   | 1004                 | 8968                | 4.08                 | 3.63                  |
| 10000 | 0.10       | 0.90       | 100        | 1800       | 8100       | 0        | 0.0958  | 0.1042   | 0.8958  | 0.9042   | 92                 | 1733               | 8175                | 108                  | 1866                 | 8025                | 3.99                 | 3.71                  |
| 10000 | 0.15       | 0.85       | 225        | 2550       | 7225       | 0        | 0.1451  | 0.1549   | 0.8451  | 0.8549   | 210                | 2480               | 7309                | 240                  | 2619                 | 7141                | 3.95                 | 3.74                  |

|       |      |      |      |       |       |   |        |        |        |        |      |      |       |      |      |       |      |      |
|-------|------|------|------|-------|-------|---|--------|--------|--------|--------|------|------|-------|------|------|-------|------|------|
| 10000 | 0.20 | 0.80 | 400  | 3200  | 6400  | 0 | 0.1945 | 0.2055 | 0.7945 | 0.8055 | 378  | 3133 | 6489  | 422  | 3266 | 6312  | 3.92 | 3.76 |
| 10000 | 0.25 | 0.75 | 625  | 3750  | 5625  | 0 | 0.2440 | 0.2560 | 0.7440 | 0.7560 | 595  | 3689 | 5715  | 655  | 3809 | 5535  | 3.91 | 3.78 |
| 10000 | 0.30 | 0.70 | 900  | 4200  | 4900  | 0 | 0.2936 | 0.3064 | 0.6936 | 0.7064 | 862  | 4148 | 4989  | 939  | 4250 | 4811  | 3.89 | 3.80 |
| 10000 | 0.35 | 0.65 | 1225 | 4550  | 4225  | 0 | 0.3434 | 0.3566 | 0.6434 | 0.6566 | 1179 | 4509 | 4311  | 1272 | 4589 | 4140  | 3.88 | 3.81 |
| 10000 | 0.40 | 0.60 | 1600 | 4800  | 3600  | 0 | 0.3932 | 0.4068 | 0.5932 | 0.6068 | 1546 | 4772 | 3682  | 1655 | 4826 | 3519  | 3.86 | 3.82 |
| 10000 | 0.45 | 0.55 | 2025 | 4950  | 3025  | 0 | 0.4431 | 0.4569 | 0.5431 | 0.5569 | 1963 | 4935 | 3101  | 2088 | 4963 | 2950  | 3.85 | 3.83 |
| 10000 | 0.50 | 0.50 | 2500 | 5000  | 2500  | 0 | 0.4931 | 0.5069 | 0.4931 | 0.5069 | 2431 | 4999 | 2570  | 2570 | 4999 | 2431  | 3.84 | 3.84 |
| 10000 | 0.55 | 0.45 | 3025 | 4950  | 2025  | 0 | 0.5431 | 0.5569 | 0.4431 | 0.4569 | 2950 | 4963 | 2088  | 3101 | 4935 | 1963  | 3.83 | 3.85 |
| 10000 | 0.60 | 0.40 | 3600 | 4800  | 1600  | 0 | 0.5932 | 0.6068 | 0.3932 | 0.4068 | 3519 | 4826 | 1655  | 3682 | 4772 | 1546  | 3.82 | 3.86 |
| 10000 | 0.65 | 0.35 | 4225 | 4550  | 1225  | 0 | 0.6434 | 0.6566 | 0.3434 | 0.3566 | 4140 | 4589 | 1272  | 4311 | 4509 | 1179  | 3.81 | 3.88 |
| 10000 | 0.70 | 0.30 | 4900 | 4200  | 900   | 0 | 0.6936 | 0.7064 | 0.2936 | 0.3064 | 4811 | 4250 | 939   | 4989 | 4148 | 862   | 3.80 | 3.89 |
| 10000 | 0.75 | 0.25 | 5625 | 3750  | 625   | 0 | 0.7440 | 0.7560 | 0.2440 | 0.2560 | 5535 | 3809 | 655   | 5715 | 3689 | 595   | 3.78 | 3.91 |
| 10000 | 0.80 | 0.20 | 6400 | 3200  | 400   | 0 | 0.7945 | 0.8055 | 0.1945 | 0.2055 | 6312 | 3266 | 422   | 6489 | 3133 | 378   | 3.76 | 3.92 |
| 10000 | 0.85 | 0.15 | 7225 | 2550  | 225   | 0 | 0.8451 | 0.8549 | 0.1451 | 0.1549 | 7141 | 2619 | 240   | 7309 | 2480 | 210   | 3.74 | 3.95 |
| 10000 | 0.90 | 0.10 | 8100 | 1800  | 100   | 0 | 0.8958 | 0.9042 | 0.0958 | 0.1042 | 8025 | 1866 | 108   | 8175 | 1733 | 92    | 3.71 | 3.99 |
| 10000 | 0.95 | 0.05 | 9025 | 950   | 25    | 0 | 0.9470 | 0.9530 | 0.0470 | 0.0530 | 8968 | 1004 | 28    | 9082 | 895  | 22    | 3.63 | 4.08 |
| 20000 | 0.05 | 0.95 | 50   | 1900  | 18050 | 0 | 0.0479 | 0.0521 | 0.9479 | 0.9521 | 46   | 1823 | 18131 | 54   | 1977 | 17969 | 4.00 | 3.69 |
| 20000 | 0.10 | 0.90 | 200  | 3600  | 16200 | 0 | 0.0971 | 0.1029 | 0.8971 | 0.9029 | 188  | 3506 | 16306 | 212  | 3694 | 16094 | 3.95 | 3.74 |
| 20000 | 0.15 | 0.85 | 450  | 5100  | 14450 | 0 | 0.1465 | 0.1535 | 0.8465 | 0.8535 | 429  | 5002 | 14569 | 471  | 5197 | 14331 | 3.92 | 3.77 |
| 20000 | 0.20 | 0.80 | 800  | 6400  | 12800 | 0 | 0.1961 | 0.2039 | 0.7961 | 0.8039 | 769  | 6305 | 12926 | 832  | 6493 | 12675 | 3.90 | 3.79 |
| 20000 | 0.25 | 0.75 | 1250 | 7500  | 11250 | 0 | 0.2458 | 0.2542 | 0.7458 | 0.7542 | 1208 | 7414 | 11378 | 1293 | 7584 | 11123 | 3.89 | 3.80 |
| 20000 | 0.30 | 0.70 | 1800 | 8400  | 9800  | 0 | 0.2955 | 0.3045 | 0.6955 | 0.7045 | 1747 | 8327 | 9926  | 1854 | 8471 | 9675  | 3.88 | 3.81 |
| 20000 | 0.35 | 0.65 | 2450 | 9100  | 8450  | 0 | 0.3453 | 0.3547 | 0.6453 | 0.6547 | 2385 | 9043 | 8572  | 2516 | 9155 | 8329  | 3.87 | 3.82 |
| 20000 | 0.40 | 0.60 | 3200 | 9600  | 7200  | 0 | 0.3952 | 0.4048 | 0.5952 | 0.6048 | 3124 | 9561 | 7316  | 3277 | 9637 | 7085  | 3.86 | 3.83 |
| 20000 | 0.45 | 0.55 | 4050 | 9900  | 6050  | 0 | 0.4451 | 0.4549 | 0.5451 | 0.5549 | 3963 | 9880 | 6158  | 4138 | 9919 | 5943  | 3.85 | 3.83 |
| 20000 | 0.50 | 0.50 | 5000 | 10000 | 5000  | 0 | 0.4951 | 0.5049 | 0.4951 | 0.5049 | 4902 | 9999 | 5098  | 5098 | 9999 | 4902  | 3.84 | 3.84 |
| 20000 | 0.55 | 0.45 | 6050 | 9900  | 4050  | 0 | 0.5451 | 0.5549 | 0.4451 | 0.4549 | 5943 | 9919 | 4138  | 6158 | 9880 | 3963  | 3.83 | 3.85 |
| 20000 | 0.60 | 0.40 | 7200 | 9600  | 3200  | 0 | 0.5952 | 0.6048 | 0.3952 | 0.4048 | 7085 | 9637 | 3277  | 7316 | 9561 | 3124  | 3.83 | 3.86 |
| 20000 | 0.65 | 0.35 | 8450 | 9100  | 2450  | 0 | 0.6453 | 0.6547 | 0.3453 | 0.3547 | 8329 | 9155 | 2516  | 8572 | 9043 | 2385  | 3.82 | 3.87 |
| 20000 | 0.70 | 0.30 | 9800 | 8400  | 1800  | 0 | 0.6955 | 0.7045 | 0.2955 | 0.3045 | 9675 | 8471 | 1854  | 9926 | 8327 | 1747  | 3.81 | 3.88 |

|        |      |      |       |       |       |   |        |        |        |        |       |       |       |       |       |       |      |      |
|--------|------|------|-------|-------|-------|---|--------|--------|--------|--------|-------|-------|-------|-------|-------|-------|------|------|
| 20000  | 0.75 | 0.25 | 11250 | 7500  | 1250  | 0 | 0.7458 | 0.7542 | 0.2458 | 0.2542 | 11123 | 7584  | 1293  | 11378 | 7414  | 1208  | 3.80 | 3.89 |
| 20000  | 0.80 | 0.20 | 12800 | 6400  | 800   | 0 | 0.7961 | 0.8039 | 0.1961 | 0.2039 | 12675 | 6493  | 832   | 12926 | 6305  | 769   | 3.79 | 3.90 |
| 20000  | 0.85 | 0.15 | 14450 | 5100  | 450   | 0 | 0.8465 | 0.8535 | 0.1465 | 0.1535 | 14331 | 5197  | 471   | 14569 | 5002  | 429   | 3.77 | 3.92 |
| 20000  | 0.90 | 0.10 | 16200 | 3600  | 200   | 0 | 0.8971 | 0.9029 | 0.0971 | 0.1029 | 16094 | 3694  | 212   | 16306 | 3506  | 188   | 3.74 | 3.95 |
| 20000  | 0.95 | 0.05 | 18050 | 1900  | 50    | 0 | 0.9479 | 0.9521 | 0.0479 | 0.0521 | 17969 | 1977  | 54    | 18131 | 1823  | 46    | 3.69 | 4.00 |
| 50000  | 0.05 | 0.95 | 125   | 4750  | 45125 | 0 | 0.0486 | 0.0514 | 0.9486 | 0.9514 | 118   | 4628  | 45253 | 132   | 4871  | 44997 | 3.94 | 3.75 |
| 50000  | 0.10 | 0.90 | 500   | 9000  | 40500 | 0 | 0.0981 | 0.1019 | 0.8981 | 0.9019 | 482   | 8851  | 40668 | 519   | 9148  | 40333 | 3.91 | 3.78 |
| 50000  | 0.15 | 0.85 | 1125  | 12750 | 36125 | 0 | 0.1478 | 0.1522 | 0.8478 | 0.8522 | 1092  | 12595 | 36313 | 1158  | 12904 | 35937 | 3.89 | 3.80 |
| 50000  | 0.20 | 0.80 | 2000  | 16000 | 32000 | 0 | 0.1975 | 0.2025 | 0.7975 | 0.8025 | 1951  | 15851 | 32199 | 2050  | 16148 | 31802 | 3.88 | 3.81 |
| 50000  | 0.25 | 0.75 | 3125  | 18750 | 28125 | 0 | 0.2473 | 0.2527 | 0.7473 | 0.7527 | 3058  | 18615 | 28327 | 3192  | 18883 | 27924 | 3.87 | 3.81 |
| 50000  | 0.30 | 0.70 | 4500  | 21000 | 24500 | 0 | 0.2972 | 0.3028 | 0.6972 | 0.7028 | 4415  | 20886 | 24699 | 4586  | 21113 | 24302 | 3.86 | 3.82 |
| 50000  | 0.35 | 0.65 | 6125  | 22750 | 21125 | 0 | 0.3470 | 0.3530 | 0.6470 | 0.6530 | 6022  | 22660 | 21318 | 6229  | 22838 | 20933 | 3.86 | 3.83 |
| 50000  | 0.40 | 0.60 | 8000  | 24000 | 18000 | 0 | 0.3970 | 0.4030 | 0.5970 | 0.6030 | 7879  | 23938 | 18183 | 8122  | 24060 | 17818 | 3.85 | 3.83 |
| 50000  | 0.45 | 0.55 | 10125 | 24750 | 15125 | 0 | 0.4469 | 0.4531 | 0.5469 | 0.5531 | 9987  | 24718 | 15295 | 10264 | 24780 | 14956 | 3.85 | 3.84 |
| 50000  | 0.50 | 0.50 | 12500 | 25000 | 12500 | 0 | 0.4969 | 0.5031 | 0.4969 | 0.5031 | 12346 | 24999 | 12655 | 12655 | 24999 | 12346 | 3.84 | 3.84 |
| 50000  | 0.55 | 0.45 | 15125 | 24750 | 10125 | 0 | 0.5469 | 0.5531 | 0.4469 | 0.4531 | 14956 | 24780 | 10264 | 15295 | 24718 | 9987  | 3.84 | 3.85 |
| 50000  | 0.60 | 0.40 | 18000 | 24000 | 8000  | 0 | 0.5970 | 0.6030 | 0.3970 | 0.4030 | 17818 | 24060 | 8122  | 18183 | 23938 | 7879  | 3.83 | 3.85 |
| 50000  | 0.65 | 0.35 | 21125 | 22750 | 6125  | 0 | 0.6470 | 0.6530 | 0.3470 | 0.3530 | 20933 | 22838 | 6229  | 21318 | 22660 | 6022  | 3.83 | 3.86 |
| 50000  | 0.70 | 0.30 | 24500 | 21000 | 4500  | 0 | 0.6972 | 0.7028 | 0.2972 | 0.3028 | 24302 | 21113 | 4586  | 24699 | 20886 | 4415  | 3.82 | 3.86 |
| 50000  | 0.75 | 0.25 | 28125 | 18750 | 3125  | 0 | 0.7473 | 0.7527 | 0.2473 | 0.2527 | 27924 | 18883 | 3192  | 28327 | 18615 | 3058  | 3.81 | 3.87 |
| 50000  | 0.80 | 0.20 | 32000 | 16000 | 2000  | 0 | 0.7975 | 0.8025 | 0.1975 | 0.2025 | 31802 | 16148 | 2050  | 32199 | 15851 | 1951  | 3.81 | 3.88 |
| 50000  | 0.85 | 0.15 | 36125 | 12750 | 1125  | 0 | 0.8478 | 0.8522 | 0.1478 | 0.1522 | 35937 | 12904 | 1158  | 36313 | 12595 | 1092  | 3.80 | 3.89 |
| 50000  | 0.90 | 0.10 | 40500 | 9000  | 500   | 0 | 0.8981 | 0.9019 | 0.0981 | 0.1019 | 40333 | 9148  | 519   | 40668 | 8851  | 482   | 3.78 | 3.91 |
| 50000  | 0.95 | 0.05 | 45125 | 4750  | 125   | 0 | 0.9486 | 0.9514 | 0.0486 | 0.0514 | 44997 | 4871  | 132   | 45253 | 4628  | 118   | 3.75 | 3.94 |
| 100000 | 0.05 | 0.95 | 250   | 9500  | 90250 | 0 | 0.0490 | 0.0510 | 0.9490 | 0.9510 | 241   | 9328  | 90432 | 260   | 9672  | 90069 | 3.91 | 3.77 |
| 100000 | 0.10 | 0.90 | 1000  | 18000 | 81000 | 0 | 0.0987 | 0.1013 | 0.8987 | 0.9013 | 974   | 17789 | 81237 | 1026  | 18210 | 80764 | 3.89 | 3.80 |
| 100000 | 0.15 | 0.85 | 2250  | 25500 | 72250 | 0 | 0.1484 | 0.1516 | 0.8484 | 0.8516 | 2203  | 25280 | 72516 | 2297  | 25719 | 71984 | 3.88 | 3.81 |
| 100000 | 0.20 | 0.80 | 4000  | 32000 | 64000 | 0 | 0.1982 | 0.2018 | 0.7982 | 0.8018 | 3930  | 31789 | 64281 | 4070  | 32210 | 63720 | 3.87 | 3.82 |
| 100000 | 0.25 | 0.75 | 6250  | 37500 | 56250 | 0 | 0.2481 | 0.2519 | 0.7481 | 0.7519 | 6155  | 37310 | 56535 | 6345  | 37689 | 55966 | 3.86 | 3.82 |
| 100000 | 0.30 | 0.70 | 9000  | 42000 | 49000 | 0 | 0.2980 | 0.3020 | 0.6980 | 0.7020 | 8880  | 41839 | 49282 | 9121  | 42160 | 48719 | 3.86 | 3.83 |

|        |      |      |       |       |       |   |        |        |        |        |       |       |       |       |       |       |      |      |
|--------|------|------|-------|-------|-------|---|--------|--------|--------|--------|-------|-------|-------|-------|-------|-------|------|------|
| 100000 | 0.35 | 0.65 | 12250 | 45500 | 42250 | 0 | 0.3479 | 0.3521 | 0.6479 | 0.6521 | 12104 | 45374 | 42522 | 12397 | 45625 | 41979 | 3.85 | 3.83 |
| 100000 | 0.40 | 0.60 | 16000 | 48000 | 36000 | 0 | 0.3979 | 0.4021 | 0.5979 | 0.6021 | 15829 | 47913 | 36258 | 16172 | 48085 | 35743 | 3.85 | 3.83 |
| 100000 | 0.45 | 0.55 | 20250 | 49500 | 30250 | 0 | 0.4478 | 0.4522 | 0.5478 | 0.5522 | 20054 | 49455 | 30490 | 20447 | 49543 | 30011 | 3.85 | 3.84 |
| 100000 | 0.50 | 0.50 | 25000 | 50000 | 25000 | 0 | 0.4978 | 0.5022 | 0.4978 | 0.5022 | 24781 | 49999 | 25220 | 25220 | 49999 | 24781 | 3.84 | 3.84 |
| 100000 | 0.55 | 0.45 | 30250 | 49500 | 20250 | 0 | 0.5478 | 0.5522 | 0.4478 | 0.4522 | 30011 | 49543 | 20447 | 30490 | 49455 | 20054 | 3.84 | 3.85 |
| 100000 | 0.60 | 0.40 | 36000 | 48000 | 16000 | 0 | 0.5979 | 0.6021 | 0.3979 | 0.4021 | 35743 | 48085 | 16172 | 36258 | 47913 | 15829 | 3.83 | 3.85 |
| 100000 | 0.65 | 0.35 | 42250 | 45500 | 12250 | 0 | 0.6479 | 0.6521 | 0.3479 | 0.3521 | 41979 | 45625 | 12397 | 42522 | 45374 | 12104 | 3.83 | 3.85 |
| 100000 | 0.70 | 0.30 | 49000 | 42000 | 9000  | 0 | 0.6980 | 0.7020 | 0.2980 | 0.3020 | 48719 | 42160 | 9121  | 49282 | 41839 | 8880  | 3.83 | 3.86 |
| 100000 | 0.75 | 0.25 | 56250 | 37500 | 6250  | 0 | 0.7481 | 0.7519 | 0.2481 | 0.2519 | 55966 | 37689 | 6345  | 56535 | 37310 | 6155  | 3.82 | 3.86 |
| 100000 | 0.80 | 0.20 | 64000 | 32000 | 4000  | 0 | 0.7982 | 0.8018 | 0.1982 | 0.2018 | 63720 | 32210 | 4070  | 64281 | 31789 | 3930  | 3.82 | 3.87 |
| 100000 | 0.85 | 0.15 | 72250 | 25500 | 2250  | 0 | 0.8484 | 0.8516 | 0.1484 | 0.1516 | 71984 | 25719 | 2297  | 72516 | 25280 | 2203  | 3.81 | 3.88 |
| 100000 | 0.90 | 0.10 | 81000 | 18000 | 1000  | 0 | 0.8987 | 0.9013 | 0.0987 | 0.1013 | 80764 | 18210 | 1026  | 81237 | 17789 | 974   | 3.80 | 3.89 |
| 100000 | 0.95 | 0.05 | 90250 | 9500  | 250   | 0 | 0.9490 | 0.9510 | 0.0490 | 0.0510 | 90069 | 9672  | 260   | 90432 | 9328  | 241   | 3.77 | 3.91 |
