# Supplementary material for: Hardy-Weinberg Equilibrium Testing of Biological Ascertainment for Mendelian Randomization Studies
Source: PubMed Central journal article supplement — Am J Epidemiol. 2009 Jan 6;169(4):505–14. doi: 10.1093/aje/kwn359 (PMC2640163; doi:10.1093/aje/kwn359), 2009-01-06
Supplement: kwn359_10.pdf [file kwn359_10.pdf]

Web Table 8. Deviations from Hardy Weinberg Equilibrium computed from the 95% CI bounds of allele frequency for sample sizes of 5000, 10000, 20000, 50000 and 100000, and for starting allele frequencies from 0.05 to 0.95 (with increments of 0.05).  $p_{true}$  and  $q_{true}$  are the allele frequencies used to start the computations. Het Obs are the observed values for Het after subtracting/adding from the homozygote group a constant number k ranging from 80% to 120%.  $\chi^2$  is the HWE  $\chi^2$  value.  $\chi^2$  (low CI) and  $\chi^2$  (high CI) are the HWE  $\chi^2$  values for the allele frequencies defined by the low bound of the 95% CI and by the high bound of the 95% CI, respectively. Also shown are the expected counts for each genotype group computed by the low and high bounds of the 95% CI.

| N    | k    | $p_{true}$ | $q_{true}$ | Hz1 Obs | Het Obs | Hz2 Obs | $\chi^2$ | LowCI p | HighCI p | LowCI q | HighCI q | Hz1 Exp (lowCI) | Het Exp (lowCI) | Hz1 Exp (low CI) | Hz1 Exp (high CI) | Het Exp (high CI) | Hz2Exp (high CI) | $\chi^2$ (low CI) | $\chi^2$ (high CI) |
|------|------|------------|------------|---------|---------|---------|----------|---------|----------|---------|----------|-----------------|-----------------|------------------|-------------------|-------------------|------------------|-------------------|--------------------|
| 5000 | 0.80 | 0.0500     | 0.9500     | 13      | 380     | 4513    | 2.23     | 0.0457  | 0.0543   | 0.9457  | 0.9543   | 10              | 436             | 4553             | 15                | 513               | 4472             | 8.05              | 35.30              |
| 5000 | 0.81 | 0.0500     | 0.9500     | 13      | 385     | 4513    | 1.99     | 0.0457  | 0.0543   | 0.9457  | 0.9543   | 10              | 436             | 4553             | 15                | 513               | 4472             | 6.87              | 32.88              |
| 5000 | 0.82 | 0.0500     | 0.9500     | 13      | 390     | 4513    | 1.76     | 0.0457  | 0.0543   | 0.9457  | 0.9543   | 10              | 436             | 4553             | 15                | 513               | 4472             | 5.80              | 30.55              |
| 5000 | 0.83 | 0.0500     | 0.9500     | 13      | 394     | 4513    | 1.55     | 0.0457  | 0.0543   | 0.9457  | 0.9543   | 10              | 436             | 4553             | 15                | 513               | 4472             | 4.83              | 28.30              |
| 5000 | 0.84 | 0.0500     | 0.9500     | 13      | 399     | 4513    | 1.36     | 0.0457  | 0.0543   | 0.9457  | 0.9543   | 10              | 436             | 4553             | 15                | 513               | 4472             | 3.96              | 26.14              |
| 5000 | 0.85 | 0.0500     | 0.9500     | 13      | 404     | 4513    | 1.18     | 0.0457  | 0.0543   | 0.9457  | 0.9543   | 10              | 436             | 4553             | 15                | 513               | 4472             | 3.20              | 24.07              |
| 5000 | 0.86 | 0.0500     | 0.9500     | 13      | 409     | 4513    | 1.02     | 0.0457  | 0.0543   | 0.9457  | 0.9543   | 10              | 436             | 4553             | 15                | 513               | 4472             | 2.54              | 22.09              |
| 5000 | 0.87 | 0.0500     | 0.9500     | 13      | 413     | 4513    | 0.87     | 0.0457  | 0.0543   | 0.9457  | 0.9543   | 10              | 436             | 4553             | 15                | 513               | 4472             | 1.99              | 20.19              |
| 5000 | 0.88 | 0.0500     | 0.9500     | 13      | 418     | 4513    | 0.73     | 0.0457  | 0.0543   | 0.9457  | 0.9543   | 10              | 436             | 4553             | 15                | 513               | 4472             | 1.54              | 18.38              |
| 5000 | 0.89 | 0.0500     | 0.9500     | 13      | 423     | 4513    | 0.61     | 0.0457  | 0.0543   | 0.9457  | 0.9543   | 10              | 436             | 4553             | 15                | 513               | 4472             | 1.19              | 16.67              |
| 5000 | 0.90 | 0.0500     | 0.9500     | 13      | 428     | 4513    | 0.50     | 0.0457  | 0.0543   | 0.9457  | 0.9543   | 10              | 436             | 4553             | 15                | 513               | 4472             | .94               | 15.03              |
| 5000 | 0.91 | 0.0500     | 0.9500     | 13      | 432     | 4513    | 0.40     | 0.0457  | 0.0543   | 0.9457  | 0.9543   | 10              | 436             | 4553             | 15                | 513               | 4472             | .80               | 13.49              |
| 5000 | 0.92 | 0.0500     | 0.9500     | 13      | 437     | 4513    | 0.31     | 0.0457  | 0.0543   | 0.9457  | 0.9543   | 10              | 436             | 4553             | 15                | 513               | 4472             | .76               | 12.03              |
| 5000 | 0.93 | 0.0500     | 0.9500     | 13      | 442     | 4513    | 0.24     | 0.0457  | 0.0543   | 0.9457  | 0.9543   | 10              | 436             | 4553             | 15                | 513               | 4472             | .83               | 10.67              |
| 5000 | 0.94 | 0.0500     | 0.9500     | 13      | 447     | 4513    | 0.17     | 0.0457  | 0.0543   | 0.9457  | 0.9543   | 10              | 436             | 4553             | 15                | 513               | 4472             | 1.00              | 9.39               |
| 5000 | 0.95 | 0.0500     | 0.9500     | 13      | 451     | 4513    | 0.12     | 0.0457  | 0.0543   | 0.9457  | 0.9543   | 10              | 436             | 4553             | 15                | 513               | 4472             | 1.27              | 8.20               |
| 5000 | 0.96 | 0.0500     | 0.9500     | 13      | 456     | 4513    | 0.07     | 0.0457  | 0.0543   | 0.9457  | 0.9543   | 10              | 436             | 4553             | 15                | 513               | 4472             | 1.65              | 7.09               |
| 5000 | 0.97 | 0.0500     | 0.9500     | 13      | 461     | 4513    | 0.04     | 0.0457  | 0.0543   | 0.9457  | 0.9543   | 10              | 436             | 4553             | 15                | 513               | 4472             | 2.13              | 6.08               |
| 5000 | 0.98 | 0.0500     | 0.9500     | 13      | 466     | 4513    | 0.02     | 0.0457  | 0.0543   | 0.9457  | 0.9543   | 10              | 436             | 4553             | 15                | 513               | 4472             | 2.71              | 5.15               |
| 5000 | 0.99 | 0.0500     | 0.9500     | 13      | 470     | 4513    | 0.00     | 0.0457  | 0.0543   | 0.9457  | 0.9543   | 10              | 436             | 4553             | 15                | 513               | 4472             | 3.39              | 4.31               |
| 5000 | 1.00 | 0.0500     | 0.9500     | 13      | 475     | 4513    | 0.00     | 0.0457  | 0.0543   | 0.9457  | 0.9543   | 10              | 436             | 4553             | 15                | 513               | 4472             | 4.18              | 3.56               |
| 5000 | 1.01 | 0.0500     | 0.9500     | 13      | 480     | 4513    | 0.00     | 0.0457  | 0.0543   | 0.9457  | 0.9543   | 10              | 436             | 4553             | 15                | 513               | 4472             | 5.08              | 2.89               |
| 5000 | 1.02 | 0.0500     | 0.9500     | 13      | 485     | 4513    | 0.02     | 0.0457  | 0.0543   | 0.9457  | 0.9543   | 10              | 436             | 4553             | 15                | 513               | 4472             | 6.07              | 2.32               |
| 5000 | 1.03 | 0.0500     | 0.9500     | 13      | 489     | 4513    | 0.04     | 0.0457  | 0.0543   | 0.9457  | 0.9543   | 10              | 436             | 4553             | 15                | 513               | 4472             | 7.17              | 1.83               |
| 5000 | 1.04 | 0.0500     | 0.9500     | 13      | 494     | 4513    | 0.07     | 0.0457  | 0.0543   | 0.9457  | 0.9543   | 10              | 436             | 4553             | 15                | 513               | 4472             | 8.37              | 1.43               |
| 5000 | 1.05 | 0.0500     | 0.9500     | 13      | 499     | 4513    | 0.11     | 0.0457  | 0.0543   | 0.9457  | 0.9543   | 10              | 436             | 4553             | 15                | 513               | 4472             | 9.68              | 1.11               |
| 5000 | 1.06 | 0.0500     | 0.9500     | 13      | 504     | 4513    | 0.15     | 0.0457  | 0.0543   | 0.9457  | 0.9543   | 10              | 436             | 4553             | 15                | 513               | 4472             | 11.09             | .89                |

|      |      |        |        |    |     |      |      |        |        |        |        |    |     |      |    |     |      |       |       |
|------|------|--------|--------|----|-----|------|------|--------|--------|--------|--------|----|-----|------|----|-----|------|-------|-------|
| 5000 | 1.07 | 0.0500 | 0.9500 | 13 | 508 | 4513 | 0.21 | 0.0457 | 0.0543 | 0.9457 | 0.9543 | 10 | 436 | 4553 | 15 | 513 | 4472 | 12.60 | .75   |
| 5000 | 1.08 | 0.0500 | 0.9500 | 13 | 513 | 4513 | 0.27 | 0.0457 | 0.0543 | 0.9457 | 0.9543 | 10 | 436 | 4553 | 15 | 513 | 4472 | 14.22 | .70   |
| 5000 | 1.09 | 0.0500 | 0.9500 | 13 | 518 | 4513 | 0.34 | 0.0457 | 0.0543 | 0.9457 | 0.9543 | 10 | 436 | 4553 | 15 | 513 | 4472 | 15.94 | .74   |
| 5000 | 1.10 | 0.0500 | 0.9500 | 13 | 523 | 4513 | 0.41 | 0.0457 | 0.0543 | 0.9457 | 0.9543 | 10 | 436 | 4553 | 15 | 513 | 4472 | 17.76 | .87   |
| 5000 | 1.11 | 0.0500 | 0.9500 | 13 | 527 | 4513 | 0.50 | 0.0457 | 0.0543 | 0.9457 | 0.9543 | 10 | 436 | 4553 | 15 | 513 | 4472 | 19.69 | 1.08  |
| 5000 | 1.12 | 0.0500 | 0.9500 | 13 | 532 | 4513 | 0.59 | 0.0457 | 0.0543 | 0.9457 | 0.9543 | 10 | 436 | 4553 | 15 | 513 | 4472 | 21.72 | 1.39  |
| 5000 | 1.13 | 0.0500 | 0.9500 | 13 | 537 | 4513 | 0.68 | 0.0457 | 0.0543 | 0.9457 | 0.9543 | 10 | 436 | 4553 | 15 | 513 | 4472 | 23.85 | 1.78  |
| 5000 | 1.14 | 0.0500 | 0.9500 | 13 | 542 | 4513 | 0.79 | 0.0457 | 0.0543 | 0.9457 | 0.9543 | 10 | 436 | 4553 | 15 | 513 | 4472 | 26.09 | 2.26  |
| 5000 | 1.15 | 0.0500 | 0.9500 | 13 | 546 | 4513 | 0.90 | 0.0457 | 0.0543 | 0.9457 | 0.9543 | 10 | 436 | 4553 | 15 | 513 | 4472 | 28.43 | 2.82  |
| 5000 | 1.16 | 0.0500 | 0.9500 | 13 | 551 | 4513 | 1.01 | 0.0457 | 0.0543 | 0.9457 | 0.9543 | 10 | 436 | 4553 | 15 | 513 | 4472 | 30.87 | 3.48  |
| 5000 | 1.17 | 0.0500 | 0.9500 | 13 | 556 | 4513 | 1.14 | 0.0457 | 0.0543 | 0.9457 | 0.9543 | 10 | 436 | 4553 | 15 | 513 | 4472 | 33.42 | 4.22  |
| 5000 | 1.18 | 0.0500 | 0.9500 | 13 | 561 | 4513 | 1.27 | 0.0457 | 0.0543 | 0.9457 | 0.9543 | 10 | 436 | 4553 | 15 | 513 | 4472 | 36.07 | 5.05  |
| 5000 | 1.19 | 0.0500 | 0.9500 | 13 | 565 | 4513 | 1.40 | 0.0457 | 0.0543 | 0.9457 | 0.9543 | 10 | 436 | 4553 | 15 | 513 | 4472 | 38.83 | 5.97  |
| 5000 | 1.20 | 0.0500 | 0.9500 | 13 | 570 | 4513 | 1.54 | 0.0457 | 0.0543 | 0.9457 | 0.9543 | 10 | 436 | 4553 | 15 | 513 | 4472 | 41.68 | 6.98  |
| 5000 | 0.80 | 0.1000 | 0.9000 | 50 | 720 | 4050 | 7.84 | 0.0941 | 0.1059 | 0.8941 | 0.9059 | 44 | 853 | 4103 | 56 | 947 | 3997 | 22.05 | 55.63 |
| 5000 | 0.81 | 0.1000 | 0.9000 | 50 | 729 | 4050 | 6.99 | 0.0941 | 0.1059 | 0.8941 | 0.9059 | 44 | 853 | 4103 | 56 | 947 | 3997 | 19.34 | 51.41 |
| 5000 | 0.82 | 0.1000 | 0.9000 | 50 | 738 | 4050 | 6.21 | 0.0941 | 0.1059 | 0.8941 | 0.9059 | 44 | 853 | 4103 | 56 | 947 | 3997 | 16.83 | 47.36 |
| 5000 | 0.83 | 0.1000 | 0.9000 | 50 | 747 | 4050 | 5.48 | 0.0941 | 0.1059 | 0.8941 | 0.9059 | 44 | 853 | 4103 | 56 | 947 | 3997 | 14.50 | 43.47 |
| 5000 | 0.84 | 0.1000 | 0.9000 | 50 | 756 | 4050 | 4.81 | 0.0941 | 0.1059 | 0.8941 | 0.9059 | 44 | 853 | 4103 | 56 | 947 | 3997 | 12.37 | 39.76 |
| 5000 | 0.85 | 0.1000 | 0.9000 | 50 | 765 | 4050 | 4.18 | 0.0941 | 0.1059 | 0.8941 | 0.9059 | 44 | 853 | 4103 | 56 | 947 | 3997 | 10.43 | 36.22 |
| 5000 | 0.86 | 0.1000 | 0.9000 | 50 | 774 | 4050 | 3.60 | 0.0941 | 0.1059 | 0.8941 | 0.9059 | 44 | 853 | 4103 | 56 | 947 | 3997 | 8.67  | 32.85 |
| 5000 | 0.87 | 0.1000 | 0.9000 | 50 | 783 | 4050 | 3.08 | 0.0941 | 0.1059 | 0.8941 | 0.9059 | 44 | 853 | 4103 | 56 | 947 | 3997 | 7.11  | 29.65 |
| 5000 | 0.88 | 0.1000 | 0.9000 | 50 | 792 | 4050 | 2.60 | 0.0941 | 0.1059 | 0.8941 | 0.9059 | 44 | 853 | 4103 | 56 | 947 | 3997 | 5.73  | 26.63 |
| 5000 | 0.89 | 0.1000 | 0.9000 | 50 | 801 | 4050 | 2.16 | 0.0941 | 0.1059 | 0.8941 | 0.9059 | 44 | 853 | 4103 | 56 | 947 | 3997 | 4.55  | 23.77 |
| 5000 | 0.90 | 0.1000 | 0.9000 | 50 | 810 | 4050 | 1.77 | 0.0941 | 0.1059 | 0.8941 | 0.9059 | 44 | 853 | 4103 | 56 | 947 | 3997 | 3.55  | 21.09 |
| 5000 | 0.91 | 0.1000 | 0.9000 | 50 | 819 | 4050 | 1.42 | 0.0941 | 0.1059 | 0.8941 | 0.9059 | 44 | 853 | 4103 | 56 | 947 | 3997 | 2.75  | 18.57 |
| 5000 | 0.92 | 0.1000 | 0.9000 | 50 | 828 | 4050 | 1.11 | 0.0941 | 0.1059 | 0.8941 | 0.9059 | 44 | 853 | 4103 | 56 | 947 | 3997 | 2.13  | 16.23 |
| 5000 | 0.93 | 0.1000 | 0.9000 | 50 | 837 | 4050 | 0.84 | 0.0941 | 0.1059 | 0.8941 | 0.9059 | 44 | 853 | 4103 | 56 | 947 | 3997 | 1.71  | 14.06 |
| 5000 | 0.94 | 0.1000 | 0.9000 | 50 | 846 | 4050 | 0.61 | 0.0941 | 0.1059 | 0.8941 | 0.9059 | 44 | 853 | 4103 | 56 | 947 | 3997 | 1.47  | 12.06 |
| 5000 | 0.95 | 0.1000 | 0.9000 | 50 | 855 | 4050 | 0.42 | 0.0941 | 0.1059 | 0.8941 | 0.9059 | 44 | 853 | 4103 | 56 | 947 | 3997 | 1.43  | 10.23 |
| 5000 | 0.96 | 0.1000 | 0.9000 | 50 | 864 | 4050 | 0.27 | 0.0941 | 0.1059 | 0.8941 | 0.9059 | 44 | 853 | 4103 | 56 | 947 | 3997 | 1.57  | 8.57  |
| 5000 | 0.97 | 0.1000 | 0.9000 | 50 | 873 | 4050 | 0.15 | 0.0941 | 0.1059 | 0.8941 | 0.9059 | 44 | 853 | 4103 | 56 | 947 | 3997 | 1.91  | 7.09  |
| 5000 | 0.98 | 0.1000 | 0.9000 | 50 | 882 | 4050 | 0.07 | 0.0941 | 0.1059 | 0.8941 | 0.9059 | 44 | 853 | 4103 | 56 | 947 | 3997 | 2.44  | 5.77  |
| 5000 | 0.99 | 0.1000 | 0.9000 | 50 | 891 | 4050 | 0.02 | 0.0941 | 0.1059 | 0.8941 | 0.9059 | 44 | 853 | 4103 | 56 | 947 | 3997 | 3.15  | 4.63  |
| 5000 | 1.00 | 0.1000 | 0.9000 | 50 | 900 | 4050 | 0.00 | 0.0941 | 0.1059 | 0.8941 | 0.9059 | 44 | 853 | 4103 | 56 | 947 | 3997 | 4.06  | 3.65  |

|      |      |        |        |     |      |      |       |        |        |        |        |     |      |      |     |      |      |       |       |
|------|------|--------|--------|-----|------|------|-------|--------|--------|--------|--------|-----|------|------|-----|------|------|-------|-------|
| 5000 | 1.01 | 0.1000 | 0.9000 | 50  | 909  | 4050 | 0.02  | 0.0941 | 0.1059 | 0.8941 | 0.9059 | 44  | 853  | 4103 | 56  | 947  | 3997 | 5.15  | 2.85  |
| 5000 | 1.02 | 0.1000 | 0.9000 | 50  | 918  | 4050 | 0.06  | 0.0941 | 0.1059 | 0.8941 | 0.9059 | 44  | 853  | 4103 | 56  | 947  | 3997 | 6.44  | 2.22  |
| 5000 | 1.03 | 0.1000 | 0.9000 | 50  | 927  | 4050 | 0.14  | 0.0941 | 0.1059 | 0.8941 | 0.9059 | 44  | 853  | 4103 | 56  | 947  | 3997 | 7.91  | 1.76  |
| 5000 | 1.04 | 0.1000 | 0.9000 | 50  | 936  | 4050 | 0.25  | 0.0941 | 0.1059 | 0.8941 | 0.9059 | 44  | 853  | 4103 | 56  | 947  | 3997 | 9.58  | 1.47  |
| 5000 | 1.05 | 0.1000 | 0.9000 | 50  | 945  | 4050 | 0.39  | 0.0941 | 0.1059 | 0.8941 | 0.9059 | 44  | 853  | 4103 | 56  | 947  | 3997 | 11.43 | 1.35  |
| 5000 | 1.06 | 0.1000 | 0.9000 | 50  | 954  | 4050 | 0.56  | 0.0941 | 0.1059 | 0.8941 | 0.9059 | 44  | 853  | 4103 | 56  | 947  | 3997 | 13.48 | 1.41  |
| 5000 | 1.07 | 0.1000 | 0.9000 | 50  | 963  | 4050 | 0.75  | 0.0941 | 0.1059 | 0.8941 | 0.9059 | 44  | 853  | 4103 | 56  | 947  | 3997 | 15.71 | 1.63  |
| 5000 | 1.08 | 0.1000 | 0.9000 | 50  | 972  | 4050 | 0.97  | 0.0941 | 0.1059 | 0.8941 | 0.9059 | 44  | 853  | 4103 | 56  | 947  | 3997 | 18.14 | 2.03  |
| 5000 | 1.09 | 0.1000 | 0.9000 | 50  | 981  | 4050 | 1.22  | 0.0941 | 0.1059 | 0.8941 | 0.9059 | 44  | 853  | 4103 | 56  | 947  | 3997 | 20.75 | 2.59  |
| 5000 | 1.10 | 0.1000 | 0.9000 | 50  | 990  | 4050 | 1.50  | 0.0941 | 0.1059 | 0.8941 | 0.9059 | 44  | 853  | 4103 | 56  | 947  | 3997 | 23.56 | 3.33  |
| 5000 | 1.11 | 0.1000 | 0.9000 | 50  | 999  | 4050 | 1.80  | 0.0941 | 0.1059 | 0.8941 | 0.9059 | 44  | 853  | 4103 | 56  | 947  | 3997 | 26.56 | 4.24  |
| 5000 | 1.12 | 0.1000 | 0.9000 | 50  | 1008 | 4050 | 2.13  | 0.0941 | 0.1059 | 0.8941 | 0.9059 | 44  | 853  | 4103 | 56  | 947  | 3997 | 29.74 | 5.32  |
| 5000 | 1.13 | 0.1000 | 0.9000 | 50  | 1017 | 4050 | 2.48  | 0.0941 | 0.1059 | 0.8941 | 0.9059 | 44  | 853  | 4103 | 56  | 947  | 3997 | 33.12 | 6.57  |
| 5000 | 1.14 | 0.1000 | 0.9000 | 50  | 1026 | 4050 | 2.86  | 0.0941 | 0.1059 | 0.8941 | 0.9059 | 44  | 853  | 4103 | 56  | 947  | 3997 | 36.68 | 7.99  |
| 5000 | 1.15 | 0.1000 | 0.9000 | 50  | 1035 | 4050 | 3.26  | 0.0941 | 0.1059 | 0.8941 | 0.9059 | 44  | 853  | 4103 | 56  | 947  | 3997 | 40.44 | 9.59  |
| 5000 | 1.16 | 0.1000 | 0.9000 | 50  | 1044 | 4050 | 3.68  | 0.0941 | 0.1059 | 0.8941 | 0.9059 | 44  | 853  | 4103 | 56  | 947  | 3997 | 44.38 | 11.35 |
| 5000 | 1.17 | 0.1000 | 0.9000 | 50  | 1053 | 4050 | 4.13  | 0.0941 | 0.1059 | 0.8941 | 0.9059 | 44  | 853  | 4103 | 56  | 947  | 3997 | 48.52 | 13.29 |
| 5000 | 1.18 | 0.1000 | 0.9000 | 50  | 1062 | 4050 | 4.60  | 0.0941 | 0.1059 | 0.8941 | 0.9059 | 44  | 853  | 4103 | 56  | 947  | 3997 | 52.84 | 15.39 |
| 5000 | 1.19 | 0.1000 | 0.9000 | 50  | 1071 | 4050 | 5.09  | 0.0941 | 0.1059 | 0.8941 | 0.9059 | 44  | 853  | 4103 | 56  | 947  | 3997 | 57.36 | 17.67 |
| 5000 | 1.20 | 0.1000 | 0.9000 | 50  | 1080 | 4050 | 5.61  | 0.0941 | 0.1059 | 0.8941 | 0.9059 | 44  | 853  | 4103 | 56  | 947  | 3997 | 62.06 | 20.12 |
| 5000 | 0.80 | 0.1500 | 0.8500 | 113 | 1020 | 3613 | 15.42 | 0.1430 | 0.1570 | 0.8430 | 0.8570 | 102 | 1226 | 3672 | 123 | 1324 | 3553 | 36.47 | 71.52 |
| 5000 | 0.81 | 0.1500 | 0.8500 | 113 | 1033 | 3613 | 13.78 | 0.1430 | 0.1570 | 0.8430 | 0.8570 | 102 | 1226 | 3672 | 123 | 1324 | 3553 | 32.32 | 65.80 |
| 5000 | 0.82 | 0.1500 | 0.8500 | 113 | 1046 | 3613 | 12.25 | 0.1430 | 0.1570 | 0.8430 | 0.8570 | 102 | 1226 | 3672 | 123 | 1324 | 3553 | 28.44 | 60.32 |
| 5000 | 0.83 | 0.1500 | 0.8500 | 113 | 1058 | 3613 | 10.83 | 0.1430 | 0.1570 | 0.8430 | 0.8570 | 102 | 1226 | 3672 | 123 | 1324 | 3553 | 24.83 | 55.08 |
| 5000 | 0.84 | 0.1500 | 0.8500 | 113 | 1071 | 3613 | 9.50  | 0.1430 | 0.1570 | 0.8430 | 0.8570 | 102 | 1226 | 3672 | 123 | 1324 | 3553 | 21.48 | 50.10 |
| 5000 | 0.85 | 0.1500 | 0.8500 | 113 | 1084 | 3613 | 8.28  | 0.1430 | 0.1570 | 0.8430 | 0.8570 | 102 | 1226 | 3672 | 123 | 1324 | 3553 | 18.40 | 45.35 |
| 5000 | 0.86 | 0.1500 | 0.8500 | 113 | 1097 | 3613 | 7.14  | 0.1430 | 0.1570 | 0.8430 | 0.8570 | 102 | 1226 | 3672 | 123 | 1324 | 3553 | 15.58 | 40.86 |
| 5000 | 0.87 | 0.1500 | 0.8500 | 113 | 1109 | 3613 | 6.11  | 0.1430 | 0.1570 | 0.8430 | 0.8570 | 102 | 1226 | 3672 | 123 | 1324 | 3553 | 13.03 | 36.61 |
| 5000 | 0.88 | 0.1500 | 0.8500 | 113 | 1122 | 3613 | 5.16  | 0.1430 | 0.1570 | 0.8430 | 0.8570 | 102 | 1226 | 3672 | 123 | 1324 | 3553 | 10.74 | 32.60 |
| 5000 | 0.89 | 0.1500 | 0.8500 | 113 | 1135 | 3613 | 4.30  | 0.1430 | 0.1570 | 0.8430 | 0.8570 | 102 | 1226 | 3672 | 123 | 1324 | 3553 | 8.72  | 28.84 |
| 5000 | 0.90 | 0.1500 | 0.8500 | 113 | 1148 | 3613 | 3.52  | 0.1430 | 0.1570 | 0.8430 | 0.8570 | 102 | 1226 | 3672 | 123 | 1324 | 3553 | 6.97  | 25.33 |
| 5000 | 0.91 | 0.1500 | 0.8500 | 113 | 1160 | 3613 | 2.83  | 0.1430 | 0.1570 | 0.8430 | 0.8570 | 102 | 1226 | 3672 | 123 | 1324 | 3553 | 5.48  | 22.06 |
| 5000 | 0.92 | 0.1500 | 0.8500 | 113 | 1173 | 3613 | 2.22  | 0.1430 | 0.1570 | 0.8430 | 0.8570 | 102 | 1226 | 3672 | 123 | 1324 | 3553 | 4.25  | 19.04 |
| 5000 | 0.93 | 0.1500 | 0.8500 | 113 | 1186 | 3613 | 1.68  | 0.1430 | 0.1570 | 0.8430 | 0.8570 | 102 | 1226 | 3672 | 123 | 1324 | 3553 | 3.29  | 16.26 |
| 5000 | 0.94 | 0.1500 | 0.8500 | 113 | 1199 | 3613 | 1.23  | 0.1430 | 0.1570 | 0.8430 | 0.8570 | 102 | 1226 | 3672 | 123 | 1324 | 3553 | 2.60  | 13.73 |

|      |      |        |        |     |      |      |       |        |        |        |        |     |      |      |     |      |      |       |       |
|------|------|--------|--------|-----|------|------|-------|--------|--------|--------|--------|-----|------|------|-----|------|------|-------|-------|
| 5000 | 0.95 | 0.1500 | 0.8500 | 113 | 1211 | 3613 | 0.84  | 0.1430 | 0.1570 | 0.8430 | 0.8570 | 102 | 1226 | 3672 | 123 | 1324 | 3553 | 2.17  | 11.44 |
| 5000 | 0.96 | 0.1500 | 0.8500 | 113 | 1224 | 3613 | 0.54  | 0.1430 | 0.1570 | 0.8430 | 0.8570 | 102 | 1226 | 3672 | 123 | 1324 | 3553 | 2.00  | 9.40  |
| 5000 | 0.97 | 0.1500 | 0.8500 | 113 | 1237 | 3613 | 0.30  | 0.1430 | 0.1570 | 0.8430 | 0.8570 | 102 | 1226 | 3672 | 123 | 1324 | 3553 | 2.10  | 7.61  |
| 5000 | 0.98 | 0.1500 | 0.8500 | 113 | 1250 | 3613 | 0.13  | 0.1430 | 0.1570 | 0.8430 | 0.8570 | 102 | 1226 | 3672 | 123 | 1324 | 3553 | 2.47  | 6.06  |
| 5000 | 0.99 | 0.1500 | 0.8500 | 113 | 1262 | 3613 | 0.03  | 0.1430 | 0.1570 | 0.8430 | 0.8570 | 102 | 1226 | 3672 | 123 | 1324 | 3553 | 3.10  | 4.76  |
| 5000 | 1.00 | 0.1500 | 0.8500 | 113 | 1275 | 3613 | 0.00  | 0.1430 | 0.1570 | 0.8430 | 0.8570 | 102 | 1226 | 3672 | 123 | 1324 | 3553 | 4.00  | 3.70  |
| 5000 | 1.01 | 0.1500 | 0.8500 | 113 | 1288 | 3613 | 0.03  | 0.1430 | 0.1570 | 0.8430 | 0.8570 | 102 | 1226 | 3672 | 123 | 1324 | 3553 | 5.16  | 2.89  |
| 5000 | 1.02 | 0.1500 | 0.8500 | 113 | 1301 | 3613 | 0.13  | 0.1430 | 0.1570 | 0.8430 | 0.8570 | 102 | 1226 | 3672 | 123 | 1324 | 3553 | 6.59  | 2.32  |
| 5000 | 1.03 | 0.1500 | 0.8500 | 113 | 1313 | 3613 | 0.29  | 0.1430 | 0.1570 | 0.8430 | 0.8570 | 102 | 1226 | 3672 | 123 | 1324 | 3553 | 8.28  | 2.00  |
| 5000 | 1.04 | 0.1500 | 0.8500 | 113 | 1326 | 3613 | 0.51  | 0.1430 | 0.1570 | 0.8430 | 0.8570 | 102 | 1226 | 3672 | 123 | 1324 | 3553 | 10.24 | 1.93  |
| 5000 | 1.05 | 0.1500 | 0.8500 | 113 | 1339 | 3613 | 0.78  | 0.1430 | 0.1570 | 0.8430 | 0.8570 | 102 | 1226 | 3672 | 123 | 1324 | 3553 | 12.46 | 2.10  |
| 5000 | 1.06 | 0.1500 | 0.8500 | 113 | 1352 | 3613 | 1.12  | 0.1430 | 0.1570 | 0.8430 | 0.8570 | 102 | 1226 | 3672 | 123 | 1324 | 3553 | 14.95 | 2.52  |
| 5000 | 1.07 | 0.1500 | 0.8500 | 113 | 1364 | 3613 | 1.52  | 0.1430 | 0.1570 | 0.8430 | 0.8570 | 102 | 1226 | 3672 | 123 | 1324 | 3553 | 17.70 | 3.18  |
| 5000 | 1.08 | 0.1500 | 0.8500 | 113 | 1377 | 3613 | 1.97  | 0.1430 | 0.1570 | 0.8430 | 0.8570 | 102 | 1226 | 3672 | 123 | 1324 | 3553 | 20.72 | 4.09  |
| 5000 | 1.09 | 0.1500 | 0.8500 | 113 | 1390 | 3613 | 2.47  | 0.1430 | 0.1570 | 0.8430 | 0.8570 | 102 | 1226 | 3672 | 123 | 1324 | 3553 | 24.01 | 5.24  |
| 5000 | 1.10 | 0.1500 | 0.8500 | 113 | 1403 | 3613 | 3.03  | 0.1430 | 0.1570 | 0.8430 | 0.8570 | 102 | 1226 | 3672 | 123 | 1324 | 3553 | 27.56 | 6.64  |
| 5000 | 1.11 | 0.1500 | 0.8500 | 113 | 1415 | 3613 | 3.64  | 0.1430 | 0.1570 | 0.8430 | 0.8570 | 102 | 1226 | 3672 | 123 | 1324 | 3553 | 31.37 | 8.28  |
| 5000 | 1.12 | 0.1500 | 0.8500 | 113 | 1428 | 3613 | 4.31  | 0.1430 | 0.1570 | 0.8430 | 0.8570 | 102 | 1226 | 3672 | 123 | 1324 | 3553 | 35.45 | 10.18 |
| 5000 | 1.13 | 0.1500 | 0.8500 | 113 | 1441 | 3613 | 5.02  | 0.1430 | 0.1570 | 0.8430 | 0.8570 | 102 | 1226 | 3672 | 123 | 1324 | 3553 | 39.80 | 12.31 |
| 5000 | 1.14 | 0.1500 | 0.8500 | 113 | 1454 | 3613 | 5.79  | 0.1430 | 0.1570 | 0.8430 | 0.8570 | 102 | 1226 | 3672 | 123 | 1324 | 3553 | 44.41 | 14.69 |
| 5000 | 1.15 | 0.1500 | 0.8500 | 113 | 1466 | 3613 | 6.60  | 0.1430 | 0.1570 | 0.8430 | 0.8570 | 102 | 1226 | 3672 | 123 | 1324 | 3553 | 49.29 | 17.32 |
| 5000 | 1.16 | 0.1500 | 0.8500 | 113 | 1479 | 3613 | 7.47  | 0.1430 | 0.1570 | 0.8430 | 0.8570 | 102 | 1226 | 3672 | 123 | 1324 | 3553 | 54.43 | 20.19 |
| 5000 | 1.17 | 0.1500 | 0.8500 | 113 | 1492 | 3613 | 8.38  | 0.1430 | 0.1570 | 0.8430 | 0.8570 | 102 | 1226 | 3672 | 123 | 1324 | 3553 | 59.84 | 23.31 |
| 5000 | 1.18 | 0.1500 | 0.8500 | 113 | 1505 | 3613 | 9.34  | 0.1430 | 0.1570 | 0.8430 | 0.8570 | 102 | 1226 | 3672 | 123 | 1324 | 3553 | 65.51 | 26.68 |
| 5000 | 1.19 | 0.1500 | 0.8500 | 113 | 1517 | 3613 | 10.34 | 0.1430 | 0.1570 | 0.8430 | 0.8570 | 102 | 1226 | 3672 | 123 | 1324 | 3553 | 71.44 | 30.29 |
| 5000 | 1.20 | 0.1500 | 0.8500 | 113 | 1530 | 3613 | 11.39 | 0.1430 | 0.1570 | 0.8430 | 0.8570 | 102 | 1226 | 3672 | 123 | 1324 | 3553 | 77.65 | 34.14 |
| 5000 | 0.80 | 0.2000 | 0.8000 | 200 | 1280 | 3200 | 23.88 | 0.1922 | 0.2078 | 0.7922 | 0.8078 | 185 | 1552 | 3263 | 216 | 1646 | 3138 | 50.28 | 83.98 |
| 5000 | 0.81 | 0.2000 | 0.8000 | 200 | 1296 | 3200 | 21.36 | 0.1922 | 0.2078 | 0.7922 | 0.8078 | 185 | 1552 | 3263 | 216 | 1646 | 3138 | 44.83 | 77.01 |
| 5000 | 0.82 | 0.2000 | 0.8000 | 200 | 1312 | 3200 | 19.01 | 0.1922 | 0.2078 | 0.7922 | 0.8078 | 185 | 1552 | 3263 | 216 | 1646 | 3138 | 39.71 | 70.35 |
| 5000 | 0.83 | 0.2000 | 0.8000 | 200 | 1328 | 3200 | 16.82 | 0.1922 | 0.2078 | 0.7922 | 0.8078 | 185 | 1552 | 3263 | 216 | 1646 | 3138 | 34.92 | 64.01 |
| 5000 | 0.84 | 0.2000 | 0.8000 | 200 | 1344 | 3200 | 14.77 | 0.1922 | 0.2078 | 0.7922 | 0.8078 | 185 | 1552 | 3263 | 216 | 1646 | 3138 | 30.46 | 57.98 |
| 5000 | 0.85 | 0.2000 | 0.8000 | 200 | 1360 | 3200 | 12.88 | 0.1922 | 0.2078 | 0.7922 | 0.8078 | 185 | 1552 | 3263 | 216 | 1646 | 3138 | 26.33 | 52.25 |
| 5000 | 0.86 | 0.2000 | 0.8000 | 200 | 1376 | 3200 | 11.13 | 0.1922 | 0.2078 | 0.7922 | 0.8078 | 185 | 1552 | 3263 | 216 | 1646 | 3138 | 22.53 | 46.84 |
| 5000 | 0.87 | 0.2000 | 0.8000 | 200 | 1392 | 3200 | 9.52  | 0.1922 | 0.2078 | 0.7922 | 0.8078 | 185 | 1552 | 3263 | 216 | 1646 | 3138 | 19.06 | 41.74 |
| 5000 | 0.88 | 0.2000 | 0.8000 | 200 | 1408 | 3200 | 8.05  | 0.1922 | 0.2078 | 0.7922 | 0.8078 | 185 | 1552 | 3263 | 216 | 1646 | 3138 | 15.92 | 36.95 |

|      |      |        |        |     |      |      |       |        |        |        |        |     |      |      |     |      |      |       |       |
|------|------|--------|--------|-----|------|------|-------|--------|--------|--------|--------|-----|------|------|-----|------|------|-------|-------|
| 5000 | 0.89 | 0.2000 | 0.8000 | 200 | 1424 | 3200 | 6.71  | 0.1922 | 0.2078 | 0.7922 | 0.8078 | 185 | 1552 | 3263 | 216 | 1646 | 3138 | 13.11 | 32.47 |
| 5000 | 0.90 | 0.2000 | 0.8000 | 200 | 1440 | 3200 | 5.50  | 0.1922 | 0.2078 | 0.7922 | 0.8078 | 185 | 1552 | 3263 | 216 | 1646 | 3138 | 10.63 | 28.31 |
| 5000 | 0.91 | 0.2000 | 0.8000 | 200 | 1456 | 3200 | 4.42  | 0.1922 | 0.2078 | 0.7922 | 0.8078 | 185 | 1552 | 3263 | 216 | 1646 | 3138 | 8.48  | 24.45 |
| 5000 | 0.92 | 0.2000 | 0.8000 | 200 | 1472 | 3200 | 3.47  | 0.1922 | 0.2078 | 0.7922 | 0.8078 | 185 | 1552 | 3263 | 216 | 1646 | 3138 | 6.66  | 20.90 |
| 5000 | 0.93 | 0.2000 | 0.8000 | 200 | 1488 | 3200 | 2.64  | 0.1922 | 0.2078 | 0.7922 | 0.8078 | 185 | 1552 | 3263 | 216 | 1646 | 3138 | 5.16  | 17.67 |
| 5000 | 0.94 | 0.2000 | 0.8000 | 200 | 1504 | 3200 | 1.92  | 0.1922 | 0.2078 | 0.7922 | 0.8078 | 185 | 1552 | 3263 | 216 | 1646 | 3138 | 4.00  | 14.75 |
| 5000 | 0.95 | 0.2000 | 0.8000 | 200 | 1520 | 3200 | 1.33  | 0.1922 | 0.2078 | 0.7922 | 0.8078 | 185 | 1552 | 3263 | 216 | 1646 | 3138 | 3.17  | 12.13 |
| 5000 | 0.96 | 0.2000 | 0.8000 | 200 | 1536 | 3200 | 0.84  | 0.1922 | 0.2078 | 0.7922 | 0.8078 | 185 | 1552 | 3263 | 216 | 1646 | 3138 | 2.67  | 9.83  |
| 5000 | 0.97 | 0.2000 | 0.8000 | 200 | 1552 | 3200 | 0.47  | 0.1922 | 0.2078 | 0.7922 | 0.8078 | 185 | 1552 | 3263 | 216 | 1646 | 3138 | 2.50  | 7.84  |
| 5000 | 0.98 | 0.2000 | 0.8000 | 200 | 1568 | 3200 | 0.21  | 0.1922 | 0.2078 | 0.7922 | 0.8078 | 185 | 1552 | 3263 | 216 | 1646 | 3138 | 2.66  | 6.16  |
| 5000 | 0.99 | 0.2000 | 0.8000 | 200 | 1584 | 3200 | 0.05  | 0.1922 | 0.2078 | 0.7922 | 0.8078 | 185 | 1552 | 3263 | 216 | 1646 | 3138 | 3.14  | 4.79  |
| 5000 | 1.00 | 0.2000 | 0.8000 | 200 | 1600 | 3200 | 0.00  | 0.1922 | 0.2078 | 0.7922 | 0.8078 | 185 | 1552 | 3263 | 216 | 1646 | 3138 | 3.96  | 3.73  |
| 5000 | 1.01 | 0.2000 | 0.8000 | 200 | 1616 | 3200 | 0.05  | 0.1922 | 0.2078 | 0.7922 | 0.8078 | 185 | 1552 | 3263 | 216 | 1646 | 3138 | 5.11  | 2.99  |
| 5000 | 1.02 | 0.2000 | 0.8000 | 200 | 1632 | 3200 | 0.20  | 0.1922 | 0.2078 | 0.7922 | 0.8078 | 185 | 1552 | 3263 | 216 | 1646 | 3138 | 6.58  | 2.55  |
| 5000 | 1.03 | 0.2000 | 0.8000 | 200 | 1648 | 3200 | 0.45  | 0.1922 | 0.2078 | 0.7922 | 0.8078 | 185 | 1552 | 3263 | 216 | 1646 | 3138 | 8.39  | 2.43  |
| 5000 | 1.04 | 0.2000 | 0.8000 | 200 | 1664 | 3200 | 0.80  | 0.1922 | 0.2078 | 0.7922 | 0.8078 | 185 | 1552 | 3263 | 216 | 1646 | 3138 | 10.53 | 2.61  |
| 5000 | 1.05 | 0.2000 | 0.8000 | 200 | 1680 | 3200 | 1.24  | 0.1922 | 0.2078 | 0.7922 | 0.8078 | 185 | 1552 | 3263 | 216 | 1646 | 3138 | 12.99 | 3.11  |
| 5000 | 1.06 | 0.2000 | 0.8000 | 200 | 1696 | 3200 | 1.77  | 0.1922 | 0.2078 | 0.7922 | 0.8078 | 185 | 1552 | 3263 | 216 | 1646 | 3138 | 15.79 | 3.92  |
| 5000 | 1.07 | 0.2000 | 0.8000 | 200 | 1712 | 3200 | 2.40  | 0.1922 | 0.2078 | 0.7922 | 0.8078 | 185 | 1552 | 3263 | 216 | 1646 | 3138 | 18.92 | 5.04  |
| 5000 | 1.08 | 0.2000 | 0.8000 | 200 | 1728 | 3200 | 3.11  | 0.1922 | 0.2078 | 0.7922 | 0.8078 | 185 | 1552 | 3263 | 216 | 1646 | 3138 | 22.37 | 6.47  |
| 5000 | 1.09 | 0.2000 | 0.8000 | 200 | 1744 | 3200 | 3.91  | 0.1922 | 0.2078 | 0.7922 | 0.8078 | 185 | 1552 | 3263 | 216 | 1646 | 3138 | 26.16 | 8.21  |
| 5000 | 1.10 | 0.2000 | 0.8000 | 200 | 1760 | 3200 | 4.80  | 0.1922 | 0.2078 | 0.7922 | 0.8078 | 185 | 1552 | 3263 | 216 | 1646 | 3138 | 30.28 | 10.26 |
| 5000 | 1.11 | 0.2000 | 0.8000 | 200 | 1776 | 3200 | 5.77  | 0.1922 | 0.2078 | 0.7922 | 0.8078 | 185 | 1552 | 3263 | 216 | 1646 | 3138 | 34.72 | 12.62 |
| 5000 | 1.12 | 0.2000 | 0.8000 | 200 | 1792 | 3200 | 6.83  | 0.1922 | 0.2078 | 0.7922 | 0.8078 | 185 | 1552 | 3263 | 216 | 1646 | 3138 | 39.50 | 15.30 |
| 5000 | 1.13 | 0.2000 | 0.8000 | 200 | 1808 | 3200 | 7.97  | 0.1922 | 0.2078 | 0.7922 | 0.8078 | 185 | 1552 | 3263 | 216 | 1646 | 3138 | 44.60 | 18.28 |
| 5000 | 1.14 | 0.2000 | 0.8000 | 200 | 1824 | 3200 | 9.19  | 0.1922 | 0.2078 | 0.7922 | 0.8078 | 185 | 1552 | 3263 | 216 | 1646 | 3138 | 50.04 | 21.58 |
| 5000 | 1.15 | 0.2000 | 0.8000 | 200 | 1840 | 3200 | 10.48 | 0.1922 | 0.2078 | 0.7922 | 0.8078 | 185 | 1552 | 3263 | 216 | 1646 | 3138 | 55.80 | 25.18 |
| 5000 | 1.16 | 0.2000 | 0.8000 | 200 | 1856 | 3200 | 11.86 | 0.1922 | 0.2078 | 0.7922 | 0.8078 | 185 | 1552 | 3263 | 216 | 1646 | 3138 | 61.90 | 29.10 |
| 5000 | 1.17 | 0.2000 | 0.8000 | 200 | 1872 | 3200 | 13.31 | 0.1922 | 0.2078 | 0.7922 | 0.8078 | 185 | 1552 | 3263 | 216 | 1646 | 3138 | 68.32 | 33.33 |
| 5000 | 1.18 | 0.2000 | 0.8000 | 200 | 1888 | 3200 | 14.84 | 0.1922 | 0.2078 | 0.7922 | 0.8078 | 185 | 1552 | 3263 | 216 | 1646 | 3138 | 75.07 | 37.87 |
| 5000 | 1.19 | 0.2000 | 0.8000 | 200 | 1904 | 3200 | 16.44 | 0.1922 | 0.2078 | 0.7922 | 0.8078 | 185 | 1552 | 3263 | 216 | 1646 | 3138 | 82.16 | 42.72 |
| 5000 | 1.20 | 0.2000 | 0.8000 | 200 | 1920 | 3200 | 18.12 | 0.1922 | 0.2078 | 0.7922 | 0.8078 | 185 | 1552 | 3263 | 216 | 1646 | 3138 | 89.57 | 47.88 |
| 5000 | 0.80 | 0.2500 | 0.7500 | 313 | 1500 | 2813 | 32.32 | 0.2415 | 0.2585 | 0.7415 | 0.7585 | 292 | 1832 | 2877 | 334 | 1917 | 2749 | 63.03 | 93.45 |
| 5000 | 0.81 | 0.2500 | 0.7500 | 313 | 1519 | 2813 | 28.94 | 0.2415 | 0.2585 | 0.7415 | 0.7585 | 292 | 1832 | 2877 | 334 | 1917 | 2749 | 56.43 | 85.48 |
| 5000 | 0.82 | 0.2500 | 0.7500 | 313 | 1538 | 2813 | 25.78 | 0.2415 | 0.2585 | 0.7415 | 0.7585 | 292 | 1832 | 2877 | 334 | 1917 | 2749 | 50.21 | 77.88 |

|      |      |        |        |     |      |      |       |        |        |        |        |     |      |      |     |      |      |       |       |
|------|------|--------|--------|-----|------|------|-------|--------|--------|--------|--------|-----|------|------|-----|------|------|-------|-------|
| 5000 | 0.83 | 0.2500 | 0.7500 | 313 | 1556 | 2813 | 22.82 | 0.2415 | 0.2585 | 0.7415 | 0.7585 | 292 | 1832 | 2877 | 334 | 1917 | 2749 | 44.38 | 70.64 |
| 5000 | 0.84 | 0.2500 | 0.7500 | 313 | 1575 | 2813 | 20.07 | 0.2415 | 0.2585 | 0.7415 | 0.7585 | 292 | 1832 | 2877 | 334 | 1917 | 2749 | 38.93 | 63.77 |
| 5000 | 0.85 | 0.2500 | 0.7500 | 313 | 1594 | 2813 | 17.51 | 0.2415 | 0.2585 | 0.7415 | 0.7585 | 292 | 1832 | 2877 | 334 | 1917 | 2749 | 33.86 | 57.27 |
| 5000 | 0.86 | 0.2500 | 0.7500 | 313 | 1613 | 2813 | 15.14 | 0.2415 | 0.2585 | 0.7415 | 0.7585 | 292 | 1832 | 2877 | 334 | 1917 | 2749 | 29.18 | 51.13 |
| 5000 | 0.87 | 0.2500 | 0.7500 | 313 | 1631 | 2813 | 12.96 | 0.2415 | 0.2585 | 0.7415 | 0.7585 | 292 | 1832 | 2877 | 334 | 1917 | 2749 | 24.88 | 45.37 |
| 5000 | 0.88 | 0.2500 | 0.7500 | 313 | 1650 | 2813 | 10.97 | 0.2415 | 0.2585 | 0.7415 | 0.7585 | 292 | 1832 | 2877 | 334 | 1917 | 2749 | 20.97 | 39.96 |
| 5000 | 0.89 | 0.2500 | 0.7500 | 313 | 1669 | 2813 | 9.15  | 0.2415 | 0.2585 | 0.7415 | 0.7585 | 292 | 1832 | 2877 | 334 | 1917 | 2749 | 17.44 | 34.93 |
| 5000 | 0.90 | 0.2500 | 0.7500 | 313 | 1688 | 2813 | 7.51  | 0.2415 | 0.2585 | 0.7415 | 0.7585 | 292 | 1832 | 2877 | 334 | 1917 | 2749 | 14.29 | 30.26 |
| 5000 | 0.91 | 0.2500 | 0.7500 | 313 | 1706 | 2813 | 6.04  | 0.2415 | 0.2585 | 0.7415 | 0.7585 | 292 | 1832 | 2877 | 334 | 1917 | 2749 | 11.53 | 25.96 |
| 5000 | 0.92 | 0.2500 | 0.7500 | 313 | 1725 | 2813 | 4.74  | 0.2415 | 0.2585 | 0.7415 | 0.7585 | 292 | 1832 | 2877 | 334 | 1917 | 2749 | 9.15  | 22.03 |
| 5000 | 0.93 | 0.2500 | 0.7500 | 313 | 1744 | 2813 | 3.61  | 0.2415 | 0.2585 | 0.7415 | 0.7585 | 292 | 1832 | 2877 | 334 | 1917 | 2749 | 7.15  | 18.46 |
| 5000 | 0.94 | 0.2500 | 0.7500 | 313 | 1763 | 2813 | 2.63  | 0.2415 | 0.2585 | 0.7415 | 0.7585 | 292 | 1832 | 2877 | 334 | 1917 | 2749 | 5.54  | 15.26 |
| 5000 | 0.95 | 0.2500 | 0.7500 | 313 | 1781 | 2813 | 1.82  | 0.2415 | 0.2585 | 0.7415 | 0.7585 | 292 | 1832 | 2877 | 334 | 1917 | 2749 | 4.31  | 12.42 |
| 5000 | 0.96 | 0.2500 | 0.7500 | 313 | 1800 | 2813 | 1.15  | 0.2415 | 0.2585 | 0.7415 | 0.7585 | 292 | 1832 | 2877 | 334 | 1917 | 2749 | 3.47  | 9.96  |
| 5000 | 0.97 | 0.2500 | 0.7500 | 313 | 1819 | 2813 | 0.64  | 0.2415 | 0.2585 | 0.7415 | 0.7585 | 292 | 1832 | 2877 | 334 | 1917 | 2749 | 3.01  | 7.86  |
| 5000 | 0.98 | 0.2500 | 0.7500 | 313 | 1838 | 2813 | 0.28  | 0.2415 | 0.2585 | 0.7415 | 0.7585 | 292 | 1832 | 2877 | 334 | 1917 | 2749 | 2.93  | 6.12  |
| 5000 | 0.99 | 0.2500 | 0.7500 | 313 | 1856 | 2813 | 0.07  | 0.2415 | 0.2585 | 0.7415 | 0.7585 | 292 | 1832 | 2877 | 334 | 1917 | 2749 | 3.24  | 4.76  |
| 5000 | 1.00 | 0.2500 | 0.7500 | 313 | 1875 | 2813 | 0.00  | 0.2415 | 0.2585 | 0.7415 | 0.7585 | 292 | 1832 | 2877 | 334 | 1917 | 2749 | 3.93  | 3.76  |
| 5000 | 1.01 | 0.2500 | 0.7500 | 313 | 1894 | 2813 | 0.07  | 0.2415 | 0.2585 | 0.7415 | 0.7585 | 292 | 1832 | 2877 | 334 | 1917 | 2749 | 5.01  | 3.13  |
| 5000 | 1.02 | 0.2500 | 0.7500 | 313 | 1913 | 2813 | 0.28  | 0.2415 | 0.2585 | 0.7415 | 0.7585 | 292 | 1832 | 2877 | 334 | 1917 | 2749 | 6.47  | 2.86  |
| 5000 | 1.03 | 0.2500 | 0.7500 | 313 | 1931 | 2813 | 0.62  | 0.2415 | 0.2585 | 0.7415 | 0.7585 | 292 | 1832 | 2877 | 334 | 1917 | 2749 | 8.31  | 2.96  |
| 5000 | 1.04 | 0.2500 | 0.7500 | 313 | 1950 | 2813 | 1.10  | 0.2415 | 0.2585 | 0.7415 | 0.7585 | 292 | 1832 | 2877 | 334 | 1917 | 2749 | 10.54 | 3.43  |
| 5000 | 1.05 | 0.2500 | 0.7500 | 313 | 1969 | 2813 | 1.70  | 0.2415 | 0.2585 | 0.7415 | 0.7585 | 292 | 1832 | 2877 | 334 | 1917 | 2749 | 13.15 | 4.26  |
| 5000 | 1.06 | 0.2500 | 0.7500 | 313 | 1988 | 2813 | 2.44  | 0.2415 | 0.2585 | 0.7415 | 0.7585 | 292 | 1832 | 2877 | 334 | 1917 | 2749 | 16.14 | 5.46  |
| 5000 | 1.07 | 0.2500 | 0.7500 | 313 | 2006 | 2813 | 3.30  | 0.2415 | 0.2585 | 0.7415 | 0.7585 | 292 | 1832 | 2877 | 334 | 1917 | 2749 | 19.52 | 7.03  |
| 5000 | 1.08 | 0.2500 | 0.7500 | 313 | 2025 | 2813 | 4.29  | 0.2415 | 0.2585 | 0.7415 | 0.7585 | 292 | 1832 | 2877 | 334 | 1917 | 2749 | 23.28 | 8.97  |
| 5000 | 1.09 | 0.2500 | 0.7500 | 313 | 2044 | 2813 | 5.40  | 0.2415 | 0.2585 | 0.7415 | 0.7585 | 292 | 1832 | 2877 | 334 | 1917 | 2749 | 27.43 | 11.27 |
| 5000 | 1.10 | 0.2500 | 0.7500 | 313 | 2063 | 2813 | 6.62  | 0.2415 | 0.2585 | 0.7415 | 0.7585 | 292 | 1832 | 2877 | 334 | 1917 | 2749 | 31.96 | 13.94 |
| 5000 | 1.11 | 0.2500 | 0.7500 | 313 | 2081 | 2813 | 7.97  | 0.2415 | 0.2585 | 0.7415 | 0.7585 | 292 | 1832 | 2877 | 334 | 1917 | 2749 | 36.87 | 16.97 |
| 5000 | 1.12 | 0.2500 | 0.7500 | 313 | 2100 | 2813 | 9.43  | 0.2415 | 0.2585 | 0.7415 | 0.7585 | 292 | 1832 | 2877 | 334 | 1917 | 2749 | 42.17 | 20.38 |
| 5000 | 1.13 | 0.2500 | 0.7500 | 313 | 2119 | 2813 | 11.01 | 0.2415 | 0.2585 | 0.7415 | 0.7585 | 292 | 1832 | 2877 | 334 | 1917 | 2749 | 47.85 | 24.15 |
| 5000 | 1.14 | 0.2500 | 0.7500 | 313 | 2138 | 2813 | 12.70 | 0.2415 | 0.2585 | 0.7415 | 0.7585 | 292 | 1832 | 2877 | 334 | 1917 | 2749 | 53.92 | 28.28 |
| 5000 | 1.15 | 0.2500 | 0.7500 | 313 | 2156 | 2813 | 14.50 | 0.2415 | 0.2585 | 0.7415 | 0.7585 | 292 | 1832 | 2877 | 334 | 1917 | 2749 | 60.37 | 32.79 |
| 5000 | 1.16 | 0.2500 | 0.7500 | 313 | 2175 | 2813 | 16.40 | 0.2415 | 0.2585 | 0.7415 | 0.7585 | 292 | 1832 | 2877 | 334 | 1917 | 2749 | 67.20 | 37.66 |
| 5000 | 1.17 | 0.2500 | 0.7500 | 313 | 2194 | 2813 | 18.42 | 0.2415 | 0.2585 | 0.7415 | 0.7585 | 292 | 1832 | 2877 | 334 | 1917 | 2749 | 74.42 | 42.89 |

|      |      |        |        |     |      |      |       |        |        |        |        |     |      |      |     |      |      |       |        |
|------|------|--------|--------|-----|------|------|-------|--------|--------|--------|--------|-----|------|------|-----|------|------|-------|--------|
| 5000 | 1.18 | 0.2500 | 0.7500 | 313 | 2213 | 2813 | 20.54 | 0.2415 | 0.2585 | 0.7415 | 0.7585 | 292 | 1832 | 2877 | 334 | 1917 | 2749 | 82.02 | 48.50  |
| 5000 | 1.19 | 0.2500 | 0.7500 | 313 | 2231 | 2813 | 22.76 | 0.2415 | 0.2585 | 0.7415 | 0.7585 | 292 | 1832 | 2877 | 334 | 1917 | 2749 | 90.00 | 54.47  |
| 5000 | 1.20 | 0.2500 | 0.7500 | 313 | 2250 | 2813 | 25.09 | 0.2415 | 0.2585 | 0.7415 | 0.7585 | 292 | 1832 | 2877 | 334 | 1917 | 2749 | 98.37 | 60.80  |
| 5000 | 0.80 | 0.3000 | 0.7000 | 450 | 1680 | 2450 | 40.05 | 0.2910 | 0.3090 | 0.6910 | 0.7090 | 423 | 2063 | 2513 | 477 | 2135 | 2388 | 74.45 | 100.21 |
| 5000 | 0.81 | 0.3000 | 0.7000 | 450 | 1701 | 2450 | 35.90 | 0.2910 | 0.3090 | 0.6910 | 0.7090 | 423 | 2063 | 2513 | 477 | 2135 | 2388 | 66.86 | 91.47  |
| 5000 | 0.82 | 0.3000 | 0.7000 | 450 | 1722 | 2450 | 32.00 | 0.2910 | 0.3090 | 0.6910 | 0.7090 | 423 | 2063 | 2513 | 477 | 2135 | 2388 | 59.70 | 83.14  |
| 5000 | 0.83 | 0.3000 | 0.7000 | 450 | 1743 | 2450 | 28.35 | 0.2910 | 0.3090 | 0.6910 | 0.7090 | 423 | 2063 | 2513 | 477 | 2135 | 2388 | 52.97 | 75.22  |
| 5000 | 0.84 | 0.3000 | 0.7000 | 450 | 1764 | 2450 | 24.94 | 0.2910 | 0.3090 | 0.6910 | 0.7090 | 423 | 2063 | 2513 | 477 | 2135 | 2388 | 46.66 | 67.71  |
| 5000 | 0.85 | 0.3000 | 0.7000 | 450 | 1785 | 2450 | 21.78 | 0.2910 | 0.3090 | 0.6910 | 0.7090 | 423 | 2063 | 2513 | 477 | 2135 | 2388 | 40.79 | 60.61  |
| 5000 | 0.86 | 0.3000 | 0.7000 | 450 | 1806 | 2450 | 18.85 | 0.2910 | 0.3090 | 0.6910 | 0.7090 | 423 | 2063 | 2513 | 477 | 2135 | 2388 | 35.33 | 53.93  |
| 5000 | 0.87 | 0.3000 | 0.7000 | 450 | 1827 | 2450 | 16.14 | 0.2910 | 0.3090 | 0.6910 | 0.7090 | 423 | 2063 | 2513 | 477 | 2135 | 2388 | 30.31 | 47.67  |
| 5000 | 0.88 | 0.3000 | 0.7000 | 450 | 1848 | 2450 | 13.67 | 0.2910 | 0.3090 | 0.6910 | 0.7090 | 423 | 2063 | 2513 | 477 | 2135 | 2388 | 25.72 | 41.81  |
| 5000 | 0.89 | 0.3000 | 0.7000 | 450 | 1869 | 2450 | 11.41 | 0.2910 | 0.3090 | 0.6910 | 0.7090 | 423 | 2063 | 2513 | 477 | 2135 | 2388 | 21.55 | 36.37  |
| 5000 | 0.90 | 0.3000 | 0.7000 | 450 | 1890 | 2450 | 9.37  | 0.2910 | 0.3090 | 0.6910 | 0.7090 | 423 | 2063 | 2513 | 477 | 2135 | 2388 | 17.81 | 31.34  |
| 5000 | 0.91 | 0.3000 | 0.7000 | 450 | 1911 | 2450 | 7.54  | 0.2910 | 0.3090 | 0.6910 | 0.7090 | 423 | 2063 | 2513 | 477 | 2135 | 2388 | 14.49 | 26.73  |
| 5000 | 0.92 | 0.3000 | 0.7000 | 450 | 1932 | 2450 | 5.92  | 0.2910 | 0.3090 | 0.6910 | 0.7090 | 423 | 2063 | 2513 | 477 | 2135 | 2388 | 11.61 | 22.52  |
| 5000 | 0.93 | 0.3000 | 0.7000 | 450 | 1953 | 2450 | 4.51  | 0.2910 | 0.3090 | 0.6910 | 0.7090 | 423 | 2063 | 2513 | 477 | 2135 | 2388 | 9.15  | 18.74  |
| 5000 | 0.94 | 0.3000 | 0.7000 | 450 | 1974 | 2450 | 3.29  | 0.2910 | 0.3090 | 0.6910 | 0.7090 | 423 | 2063 | 2513 | 477 | 2135 | 2388 | 7.12  | 15.36  |
| 5000 | 0.95 | 0.3000 | 0.7000 | 450 | 1995 | 2450 | 2.27  | 0.2910 | 0.3090 | 0.6910 | 0.7090 | 423 | 2063 | 2513 | 477 | 2135 | 2388 | 5.52  | 12.40  |
| 5000 | 0.96 | 0.3000 | 0.7000 | 450 | 2016 | 2450 | 1.44  | 0.2910 | 0.3090 | 0.6910 | 0.7090 | 423 | 2063 | 2513 | 477 | 2135 | 2388 | 4.34  | 9.85   |
| 5000 | 0.97 | 0.3000 | 0.7000 | 450 | 2037 | 2450 | 0.81  | 0.2910 | 0.3090 | 0.6910 | 0.7090 | 423 | 2063 | 2513 | 477 | 2135 | 2388 | 3.59  | 7.71   |
| 5000 | 0.98 | 0.3000 | 0.7000 | 450 | 2058 | 2450 | 0.36  | 0.2910 | 0.3090 | 0.6910 | 0.7090 | 423 | 2063 | 2513 | 477 | 2135 | 2388 | 3.27  | 5.99   |
| 5000 | 0.99 | 0.3000 | 0.7000 | 450 | 2079 | 2450 | 0.09  | 0.2910 | 0.3090 | 0.6910 | 0.7090 | 423 | 2063 | 2513 | 477 | 2135 | 2388 | 3.38  | 4.68   |
| 5000 | 1.00 | 0.3000 | 0.7000 | 450 | 2100 | 2450 | 0.00  | 0.2910 | 0.3090 | 0.6910 | 0.7090 | 423 | 2063 | 2513 | 477 | 2135 | 2388 | 3.91  | 3.78   |
| 5000 | 1.01 | 0.3000 | 0.7000 | 450 | 2121 | 2450 | 0.09  | 0.2910 | 0.3090 | 0.6910 | 0.7090 | 423 | 2063 | 2513 | 477 | 2135 | 2388 | 4.87  | 3.29   |
| 5000 | 1.02 | 0.3000 | 0.7000 | 450 | 2142 | 2450 | 0.35  | 0.2910 | 0.3090 | 0.6910 | 0.7090 | 423 | 2063 | 2513 | 477 | 2135 | 2388 | 6.26  | 3.22   |
| 5000 | 1.03 | 0.3000 | 0.7000 | 450 | 2163 | 2450 | 0.78  | 0.2910 | 0.3090 | 0.6910 | 0.7090 | 423 | 2063 | 2513 | 477 | 2135 | 2388 | 8.08  | 3.57   |
| 5000 | 1.04 | 0.3000 | 0.7000 | 450 | 2184 | 2450 | 1.38  | 0.2910 | 0.3090 | 0.6910 | 0.7090 | 423 | 2063 | 2513 | 477 | 2135 | 2388 | 10.32 | 4.32   |
| 5000 | 1.05 | 0.3000 | 0.7000 | 450 | 2205 | 2450 | 2.14  | 0.2910 | 0.3090 | 0.6910 | 0.7090 | 423 | 2063 | 2513 | 477 | 2135 | 2388 | 12.99 | 5.49   |
| 5000 | 1.06 | 0.3000 | 0.7000 | 450 | 2226 | 2450 | 3.07  | 0.2910 | 0.3090 | 0.6910 | 0.7090 | 423 | 2063 | 2513 | 477 | 2135 | 2388 | 16.09 | 7.07   |
| 5000 | 1.07 | 0.3000 | 0.7000 | 450 | 2247 | 2450 | 4.15  | 0.2910 | 0.3090 | 0.6910 | 0.7090 | 423 | 2063 | 2513 | 477 | 2135 | 2388 | 19.62 | 9.06   |
| 5000 | 1.08 | 0.3000 | 0.7000 | 450 | 2268 | 2450 | 5.40  | 0.2910 | 0.3090 | 0.6910 | 0.7090 | 423 | 2063 | 2513 | 477 | 2135 | 2388 | 23.57 | 11.47  |
| 5000 | 1.09 | 0.3000 | 0.7000 | 450 | 2289 | 2450 | 6.79  | 0.2910 | 0.3090 | 0.6910 | 0.7090 | 423 | 2063 | 2513 | 477 | 2135 | 2388 | 27.95 | 14.29  |
| 5000 | 1.10 | 0.3000 | 0.7000 | 450 | 2310 | 2450 | 8.34  | 0.2910 | 0.3090 | 0.6910 | 0.7090 | 423 | 2063 | 2513 | 477 | 2135 | 2388 | 32.76 | 17.53  |
| 5000 | 1.11 | 0.3000 | 0.7000 | 450 | 2331 | 2450 | 10.04 | 0.2910 | 0.3090 | 0.6910 | 0.7090 | 423 | 2063 | 2513 | 477 | 2135 | 2388 | 38.00 | 21.17  |

|      |      |        |        |     |      |      |       |        |        |        |        |     |      |      |     |      |      |        |        |
|------|------|--------|--------|-----|------|------|-------|--------|--------|--------|--------|-----|------|------|-----|------|------|--------|--------|
| 5000 | 1.12 | 0.3000 | 0.7000 | 450 | 2352 | 2450 | 11.89 | 0.2910 | 0.3090 | 0.6910 | 0.7090 | 423 | 2063 | 2513 | 477 | 2135 | 2388 | 43.66  | 25.23  |
| 5000 | 1.13 | 0.3000 | 0.7000 | 450 | 2373 | 2450 | 13.88 | 0.2910 | 0.3090 | 0.6910 | 0.7090 | 423 | 2063 | 2513 | 477 | 2135 | 2388 | 49.75  | 29.70  |
| 5000 | 1.14 | 0.3000 | 0.7000 | 450 | 2394 | 2450 | 16.01 | 0.2910 | 0.3090 | 0.6910 | 0.7090 | 423 | 2063 | 2513 | 477 | 2135 | 2388 | 56.27  | 34.59  |
| 5000 | 1.15 | 0.3000 | 0.7000 | 450 | 2415 | 2450 | 18.28 | 0.2910 | 0.3090 | 0.6910 | 0.7090 | 423 | 2063 | 2513 | 477 | 2135 | 2388 | 63.22  | 39.89  |
| 5000 | 1.16 | 0.3000 | 0.7000 | 450 | 2436 | 2450 | 20.70 | 0.2910 | 0.3090 | 0.6910 | 0.7090 | 423 | 2063 | 2513 | 477 | 2135 | 2388 | 70.59  | 45.60  |
| 5000 | 1.17 | 0.3000 | 0.7000 | 450 | 2457 | 2450 | 23.24 | 0.2910 | 0.3090 | 0.6910 | 0.7090 | 423 | 2063 | 2513 | 477 | 2135 | 2388 | 78.39  | 51.73  |
| 5000 | 1.18 | 0.3000 | 0.7000 | 450 | 2478 | 2450 | 25.93 | 0.2910 | 0.3090 | 0.6910 | 0.7090 | 423 | 2063 | 2513 | 477 | 2135 | 2388 | 86.62  | 58.26  |
| 5000 | 1.19 | 0.3000 | 0.7000 | 450 | 2499 | 2450 | 28.74 | 0.2910 | 0.3090 | 0.6910 | 0.7090 | 423 | 2063 | 2513 | 477 | 2135 | 2388 | 95.28  | 65.22  |
| 5000 | 1.20 | 0.3000 | 0.7000 | 450 | 2520 | 2450 | 31.69 | 0.2910 | 0.3090 | 0.6910 | 0.7090 | 423 | 2063 | 2513 | 477 | 2135 | 2388 | 104.36 | 72.58  |
| 5000 | 0.80 | 0.3500 | 0.6500 | 613 | 1820 | 2113 | 46.57 | 0.3407 | 0.3593 | 0.6407 | 0.6593 | 580 | 2246 | 2174 | 646 | 2302 | 2052 | 84.35  | 104.46 |
| 5000 | 0.81 | 0.3500 | 0.6500 | 613 | 1843 | 2113 | 41.76 | 0.3407 | 0.3593 | 0.6407 | 0.6593 | 580 | 2246 | 2174 | 646 | 2302 | 2052 | 75.95  | 95.16  |
| 5000 | 0.82 | 0.3500 | 0.6500 | 613 | 1866 | 2113 | 37.25 | 0.3407 | 0.3593 | 0.6407 | 0.6593 | 580 | 2246 | 2174 | 646 | 2302 | 2052 | 68.01  | 86.30  |
| 5000 | 0.83 | 0.3500 | 0.6500 | 613 | 1888 | 2113 | 33.02 | 0.3407 | 0.3593 | 0.6407 | 0.6593 | 580 | 2246 | 2174 | 646 | 2302 | 2052 | 60.53  | 77.90  |
| 5000 | 0.84 | 0.3500 | 0.6500 | 613 | 1911 | 2113 | 29.07 | 0.3407 | 0.3593 | 0.6407 | 0.6593 | 580 | 2246 | 2174 | 646 | 2302 | 2052 | 53.51  | 69.94  |
| 5000 | 0.85 | 0.3500 | 0.6500 | 613 | 1934 | 2113 | 25.39 | 0.3407 | 0.3593 | 0.6407 | 0.6593 | 580 | 2246 | 2174 | 646 | 2302 | 2052 | 46.95  | 62.44  |
| 5000 | 0.86 | 0.3500 | 0.6500 | 613 | 1957 | 2113 | 21.99 | 0.3407 | 0.3593 | 0.6407 | 0.6593 | 580 | 2246 | 2174 | 646 | 2302 | 2052 | 40.85  | 55.38  |
| 5000 | 0.87 | 0.3500 | 0.6500 | 613 | 1979 | 2113 | 18.84 | 0.3407 | 0.3593 | 0.6407 | 0.6593 | 580 | 2246 | 2174 | 646 | 2302 | 2052 | 35.22  | 48.77  |
| 5000 | 0.88 | 0.3500 | 0.6500 | 613 | 2002 | 2113 | 15.96 | 0.3407 | 0.3593 | 0.6407 | 0.6593 | 580 | 2246 | 2174 | 646 | 2302 | 2052 | 30.04  | 42.61  |
| 5000 | 0.89 | 0.3500 | 0.6500 | 613 | 2025 | 2113 | 13.33 | 0.3407 | 0.3593 | 0.6407 | 0.6593 | 580 | 2246 | 2174 | 646 | 2302 | 2052 | 25.33  | 36.91  |
| 5000 | 0.90 | 0.3500 | 0.6500 | 613 | 2048 | 2113 | 10.95 | 0.3407 | 0.3593 | 0.6407 | 0.6593 | 580 | 2246 | 2174 | 646 | 2302 | 2052 | 21.08  | 31.65  |
| 5000 | 0.91 | 0.3500 | 0.6500 | 613 | 2070 | 2113 | 8.82  | 0.3407 | 0.3593 | 0.6407 | 0.6593 | 580 | 2246 | 2174 | 646 | 2302 | 2052 | 17.28  | 26.84  |
| 5000 | 0.92 | 0.3500 | 0.6500 | 613 | 2093 | 2113 | 6.93  | 0.3407 | 0.3593 | 0.6407 | 0.6593 | 580 | 2246 | 2174 | 646 | 2302 | 2052 | 13.95  | 22.48  |
| 5000 | 0.93 | 0.3500 | 0.6500 | 613 | 2116 | 2113 | 5.27  | 0.3407 | 0.3593 | 0.6407 | 0.6593 | 580 | 2246 | 2174 | 646 | 2302 | 2052 | 11.08  | 18.57  |
| 5000 | 0.94 | 0.3500 | 0.6500 | 613 | 2139 | 2113 | 3.85  | 0.3407 | 0.3593 | 0.6407 | 0.6593 | 580 | 2246 | 2174 | 646 | 2302 | 2052 | 8.67   | 15.11  |
| 5000 | 0.95 | 0.3500 | 0.6500 | 613 | 2161 | 2113 | 2.66  | 0.3407 | 0.3593 | 0.6407 | 0.6593 | 580 | 2246 | 2174 | 646 | 2302 | 2052 | 6.72   | 12.10  |
| 5000 | 0.96 | 0.3500 | 0.6500 | 613 | 2184 | 2113 | 1.69  | 0.3407 | 0.3593 | 0.6407 | 0.6593 | 580 | 2246 | 2174 | 646 | 2302 | 2052 | 5.24   | 9.54   |
| 5000 | 0.97 | 0.3500 | 0.6500 | 613 | 2207 | 2113 | 0.95  | 0.3407 | 0.3593 | 0.6407 | 0.6593 | 580 | 2246 | 2174 | 646 | 2302 | 2052 | 4.21   | 7.43   |
| 5000 | 0.98 | 0.3500 | 0.6500 | 613 | 2230 | 2113 | 0.42  | 0.3407 | 0.3593 | 0.6407 | 0.6593 | 580 | 2246 | 2174 | 646 | 2302 | 2052 | 3.64   | 5.77   |
| 5000 | 0.99 | 0.3500 | 0.6500 | 613 | 2252 | 2113 | 0.10  | 0.3407 | 0.3593 | 0.6407 | 0.6593 | 580 | 2246 | 2174 | 646 | 2302 | 2052 | 3.54   | 4.56   |
| 5000 | 1.00 | 0.3500 | 0.6500 | 613 | 2275 | 2113 | 0.00  | 0.3407 | 0.3593 | 0.6407 | 0.6593 | 580 | 2246 | 2174 | 646 | 2302 | 2052 | 3.89   | 3.80   |
| 5000 | 1.01 | 0.3500 | 0.6500 | 613 | 2298 | 2113 | 0.10  | 0.3407 | 0.3593 | 0.6407 | 0.6593 | 580 | 2246 | 2174 | 646 | 2302 | 2052 | 4.71   | 3.48   |
| 5000 | 1.02 | 0.3500 | 0.6500 | 613 | 2321 | 2113 | 0.41  | 0.3407 | 0.3593 | 0.6407 | 0.6593 | 580 | 2246 | 2174 | 646 | 2302 | 2052 | 5.99   | 3.62   |
| 5000 | 1.03 | 0.3500 | 0.6500 | 613 | 2343 | 2113 | 0.92  | 0.3407 | 0.3593 | 0.6407 | 0.6593 | 580 | 2246 | 2174 | 646 | 2302 | 2052 | 7.72   | 4.21   |
| 5000 | 1.04 | 0.3500 | 0.6500 | 613 | 2366 | 2113 | 1.62  | 0.3407 | 0.3593 | 0.6407 | 0.6593 | 580 | 2246 | 2174 | 646 | 2302 | 2052 | 9.92   | 5.25   |
| 5000 | 1.05 | 0.3500 | 0.6500 | 613 | 2389 | 2113 | 2.52  | 0.3407 | 0.3593 | 0.6407 | 0.6593 | 580 | 2246 | 2174 | 646 | 2302 | 2052 | 12.58  | 6.73   |



|      |      |        |        |     |      |      |       |        |        |        |        |     |      |      |     |      |      |        |        |
|------|------|--------|--------|-----|------|------|-------|--------|--------|--------|--------|-----|------|------|-----|------|------|--------|--------|
| 5000 | 1.06 | 0.3500 | 0.6500 | 613 | 2412 | 2113 | 3.61  | 0.3407 | 0.3593 | 0.6407 | 0.6593 | 580 | 2246 | 2174 | 646 | 2302 | 2052 | 15.70  | 8.67   |
| 5000 | 1.07 | 0.3500 | 0.6500 | 613 | 2434 | 2113 | 4.89  | 0.3407 | 0.3593 | 0.6407 | 0.6593 | 580 | 2246 | 2174 | 646 | 2302 | 2052 | 19.28  | 11.05  |
| 5000 | 1.08 | 0.3500 | 0.6500 | 613 | 2457 | 2113 | 6.35  | 0.3407 | 0.3593 | 0.6407 | 0.6593 | 580 | 2246 | 2174 | 646 | 2302 | 2052 | 23.33  | 13.89  |
| 5000 | 1.09 | 0.3500 | 0.6500 | 613 | 2480 | 2113 | 8.00  | 0.3407 | 0.3593 | 0.6407 | 0.6593 | 580 | 2246 | 2174 | 646 | 2302 | 2052 | 27.83  | 17.17  |
| 5000 | 1.10 | 0.3500 | 0.6500 | 613 | 2503 | 2113 | 9.82  | 0.3407 | 0.3593 | 0.6407 | 0.6593 | 580 | 2246 | 2174 | 646 | 2302 | 2052 | 32.79  | 20.91  |
| 5000 | 1.11 | 0.3500 | 0.6500 | 613 | 2525 | 2113 | 11.82 | 0.3407 | 0.3593 | 0.6407 | 0.6593 | 580 | 2246 | 2174 | 646 | 2302 | 2052 | 38.22  | 25.09  |
| 5000 | 1.12 | 0.3500 | 0.6500 | 613 | 2548 | 2113 | 14.00 | 0.3407 | 0.3593 | 0.6407 | 0.6593 | 580 | 2246 | 2174 | 646 | 2302 | 2052 | 44.10  | 29.73  |
| 5000 | 1.13 | 0.3500 | 0.6500 | 613 | 2571 | 2113 | 16.35 | 0.3407 | 0.3593 | 0.6407 | 0.6593 | 580 | 2246 | 2174 | 646 | 2302 | 2052 | 50.45  | 34.81  |
| 5000 | 1.14 | 0.3500 | 0.6500 | 613 | 2594 | 2113 | 18.86 | 0.3407 | 0.3593 | 0.6407 | 0.6593 | 580 | 2246 | 2174 | 646 | 2302 | 2052 | 57.26  | 40.34  |
| 5000 | 1.15 | 0.3500 | 0.6500 | 613 | 2616 | 2113 | 21.55 | 0.3407 | 0.3593 | 0.6407 | 0.6593 | 580 | 2246 | 2174 | 646 | 2302 | 2052 | 64.53  | 46.32  |
| 5000 | 1.16 | 0.3500 | 0.6500 | 613 | 2639 | 2113 | 24.40 | 0.3407 | 0.3593 | 0.6407 | 0.6593 | 580 | 2246 | 2174 | 646 | 2302 | 2052 | 72.26  | 52.76  |
| 5000 | 1.17 | 0.3500 | 0.6500 | 613 | 2662 | 2113 | 27.41 | 0.3407 | 0.3593 | 0.6407 | 0.6593 | 580 | 2246 | 2174 | 646 | 2302 | 2052 | 80.45  | 59.64  |
| 5000 | 1.18 | 0.3500 | 0.6500 | 613 | 2685 | 2113 | 30.58 | 0.3407 | 0.3593 | 0.6407 | 0.6593 | 580 | 2246 | 2174 | 646 | 2302 | 2052 | 89.10  | 66.97  |
| 5000 | 1.19 | 0.3500 | 0.6500 | 613 | 2707 | 2113 | 33.91 | 0.3407 | 0.3593 | 0.6407 | 0.6593 | 580 | 2246 | 2174 | 646 | 2302 | 2052 | 98.21  | 74.75  |
| 5000 | 1.20 | 0.3500 | 0.6500 | 613 | 2730 | 2113 | 37.39 | 0.3407 | 0.3593 | 0.6407 | 0.6593 | 580 | 2246 | 2174 | 646 | 2302 | 2052 | 107.78 | 82.98  |
| 5000 | 0.80 | 0.4000 | 0.6000 | 800 | 1920 | 1800 | 51.48 | 0.3904 | 0.4096 | 0.5904 | 0.6096 | 762 | 2380 | 1858 | 839 | 2418 | 1743 | 92.57  | 106.35 |
| 5000 | 0.81 | 0.4000 | 0.6000 | 800 | 1944 | 1800 | 46.19 | 0.3904 | 0.4096 | 0.5904 | 0.6096 | 762 | 2380 | 1858 | 839 | 2418 | 1743 | 83.53  | 96.69  |
| 5000 | 0.82 | 0.4000 | 0.6000 | 800 | 1968 | 1800 | 41.21 | 0.3904 | 0.4096 | 0.5904 | 0.6096 | 762 | 2380 | 1858 | 839 | 2418 | 1743 | 74.99  | 87.52  |
| 5000 | 0.83 | 0.4000 | 0.6000 | 800 | 1992 | 1800 | 36.55 | 0.3904 | 0.4096 | 0.5904 | 0.6096 | 762 | 2380 | 1858 | 839 | 2418 | 1743 | 66.92  | 78.82  |
| 5000 | 0.84 | 0.4000 | 0.6000 | 800 | 2016 | 1800 | 32.19 | 0.3904 | 0.4096 | 0.5904 | 0.6096 | 762 | 2380 | 1858 | 839 | 2418 | 1743 | 59.34  | 70.59  |
| 5000 | 0.85 | 0.4000 | 0.6000 | 800 | 2040 | 1800 | 28.13 | 0.3904 | 0.4096 | 0.5904 | 0.6096 | 762 | 2380 | 1858 | 839 | 2418 | 1743 | 52.24  | 62.85  |
| 5000 | 0.86 | 0.4000 | 0.6000 | 800 | 2064 | 1800 | 24.36 | 0.3904 | 0.4096 | 0.5904 | 0.6096 | 762 | 2380 | 1858 | 839 | 2418 | 1743 | 45.63  | 55.58  |
| 5000 | 0.87 | 0.4000 | 0.6000 | 800 | 2088 | 1800 | 20.89 | 0.3904 | 0.4096 | 0.5904 | 0.6096 | 762 | 2380 | 1858 | 839 | 2418 | 1743 | 39.50  | 48.78  |
| 5000 | 0.88 | 0.4000 | 0.6000 | 800 | 2112 | 1800 | 17.70 | 0.3904 | 0.4096 | 0.5904 | 0.6096 | 762 | 2380 | 1858 | 839 | 2418 | 1743 | 33.86  | 42.47  |
| 5000 | 0.89 | 0.4000 | 0.6000 | 800 | 2136 | 1800 | 14.79 | 0.3904 | 0.4096 | 0.5904 | 0.6096 | 762 | 2380 | 1858 | 839 | 2418 | 1743 | 28.70  | 36.63  |
| 5000 | 0.90 | 0.4000 | 0.6000 | 800 | 2160 | 1800 | 12.15 | 0.3904 | 0.4096 | 0.5904 | 0.6096 | 762 | 2380 | 1858 | 839 | 2418 | 1743 | 24.02  | 31.26  |
| 5000 | 0.91 | 0.4000 | 0.6000 | 800 | 2184 | 1800 | 9.79  | 0.3904 | 0.4096 | 0.5904 | 0.6096 | 762 | 2380 | 1858 | 839 | 2418 | 1743 | 19.83  | 26.37  |
| 5000 | 0.92 | 0.4000 | 0.6000 | 800 | 2208 | 1800 | 7.69  | 0.3904 | 0.4096 | 0.5904 | 0.6096 | 762 | 2380 | 1858 | 839 | 2418 | 1743 | 16.12  | 21.96  |
| 5000 | 0.93 | 0.4000 | 0.6000 | 800 | 2232 | 1800 | 5.86  | 0.3904 | 0.4096 | 0.5904 | 0.6096 | 762 | 2380 | 1858 | 839 | 2418 | 1743 | 12.89  | 18.02  |
| 5000 | 0.94 | 0.4000 | 0.6000 | 800 | 2256 | 1800 | 4.28  | 0.3904 | 0.4096 | 0.5904 | 0.6096 | 762 | 2380 | 1858 | 839 | 2418 | 1743 | 10.15  | 14.57  |
| 5000 | 0.95 | 0.4000 | 0.6000 | 800 | 2280 | 1800 | 2.96  | 0.3904 | 0.4096 | 0.5904 | 0.6096 | 762 | 2380 | 1858 | 839 | 2418 | 1743 | 7.90   | 11.58  |
| 5000 | 0.96 | 0.4000 | 0.6000 | 800 | 2304 | 1800 | 1.88  | 0.3904 | 0.4096 | 0.5904 | 0.6096 | 762 | 2380 | 1858 | 839 | 2418 | 1743 | 6.12   | 9.08   |
| 5000 | 0.97 | 0.4000 | 0.6000 | 800 | 2328 | 1800 | 1.05  | 0.3904 | 0.4096 | 0.5904 | 0.6096 | 762 | 2380 | 1858 | 839 | 2418 | 1743 | 4.84   | 7.05   |
| 5000 | 0.98 | 0.4000 | 0.6000 | 800 | 2352 | 1800 | 0.47  | 0.3904 | 0.4096 | 0.5904 | 0.6096 | 762 | 2380 | 1858 | 839 | 2418 | 1743 | 4.03   | 5.49   |
| 5000 | 0.99 | 0.4000 | 0.6000 | 800 | 2376 | 1800 | 0.12  | 0.3904 | 0.4096 | 0.5904 | 0.6096 | 762 | 2380 | 1858 | 839 | 2418 | 1743 | 3.71   | 4.41   |

|      |      |        |        |      |      |      |       |        |        |        |        |     |      |      |      |      |      |        |        |
|------|------|--------|--------|------|------|------|-------|--------|--------|--------|--------|-----|------|------|------|------|------|--------|--------|
| 5000 | 1.00 | 0.4000 | 0.6000 | 800  | 2400 | 1800 | 0.00  | 0.3904 | 0.4096 | 0.5904 | 0.6096 | 762 | 2380 | 1858 | 839  | 2418 | 1743 | 3.87   | 3.81   |
| 5000 | 1.01 | 0.4000 | 0.6000 | 800  | 2424 | 1800 | 0.11  | 0.3904 | 0.4096 | 0.5904 | 0.6096 | 762 | 2380 | 1858 | 839  | 2418 | 1743 | 4.52   | 3.69   |
| 5000 | 1.02 | 0.4000 | 0.6000 | 800  | 2448 | 1800 | 0.46  | 0.3904 | 0.4096 | 0.5904 | 0.6096 | 762 | 2380 | 1858 | 839  | 2418 | 1743 | 5.65   | 4.04   |
| 5000 | 1.03 | 0.4000 | 0.6000 | 800  | 2472 | 1800 | 1.02  | 0.3904 | 0.4096 | 0.5904 | 0.6096 | 762 | 2380 | 1858 | 839  | 2418 | 1743 | 7.27   | 4.87   |
| 5000 | 1.04 | 0.4000 | 0.6000 | 800  | 2496 | 1800 | 1.81  | 0.3904 | 0.4096 | 0.5904 | 0.6096 | 762 | 2380 | 1858 | 839  | 2418 | 1743 | 9.37   | 6.17   |
| 5000 | 1.05 | 0.4000 | 0.6000 | 800  | 2520 | 1800 | 2.81  | 0.3904 | 0.4096 | 0.5904 | 0.6096 | 762 | 2380 | 1858 | 839  | 2418 | 1743 | 11.96  | 7.95   |
| 5000 | 1.06 | 0.4000 | 0.6000 | 800  | 2544 | 1800 | 4.02  | 0.3904 | 0.4096 | 0.5904 | 0.6096 | 762 | 2380 | 1858 | 839  | 2418 | 1743 | 15.02  | 10.21  |
| 5000 | 1.07 | 0.4000 | 0.6000 | 800  | 2568 | 1800 | 5.45  | 0.3904 | 0.4096 | 0.5904 | 0.6096 | 762 | 2380 | 1858 | 839  | 2418 | 1743 | 18.58  | 12.94  |
| 5000 | 1.08 | 0.4000 | 0.6000 | 800  | 2592 | 1800 | 7.08  | 0.3904 | 0.4096 | 0.5904 | 0.6096 | 762 | 2380 | 1858 | 839  | 2418 | 1743 | 22.61  | 16.15  |
| 5000 | 1.09 | 0.4000 | 0.6000 | 800  | 2616 | 1800 | 8.92  | 0.3904 | 0.4096 | 0.5904 | 0.6096 | 762 | 2380 | 1858 | 839  | 2418 | 1743 | 27.13  | 19.84  |
| 5000 | 1.10 | 0.4000 | 0.6000 | 800  | 2640 | 1800 | 10.95 | 0.3904 | 0.4096 | 0.5904 | 0.6096 | 762 | 2380 | 1858 | 839  | 2418 | 1743 | 32.14  | 24.00  |
| 5000 | 1.11 | 0.4000 | 0.6000 | 800  | 2664 | 1800 | 13.19 | 0.3904 | 0.4096 | 0.5904 | 0.6096 | 762 | 2380 | 1858 | 839  | 2418 | 1743 | 37.63  | 28.64  |
| 5000 | 1.12 | 0.4000 | 0.6000 | 800  | 2688 | 1800 | 15.62 | 0.3904 | 0.4096 | 0.5904 | 0.6096 | 762 | 2380 | 1858 | 839  | 2418 | 1743 | 43.60  | 33.76  |
| 5000 | 1.13 | 0.4000 | 0.6000 | 800  | 2712 | 1800 | 18.24 | 0.3904 | 0.4096 | 0.5904 | 0.6096 | 762 | 2380 | 1858 | 839  | 2418 | 1743 | 50.05  | 39.35  |
| 5000 | 1.14 | 0.4000 | 0.6000 | 800  | 2736 | 1800 | 21.05 | 0.3904 | 0.4096 | 0.5904 | 0.6096 | 762 | 2380 | 1858 | 839  | 2418 | 1743 | 57.00  | 45.42  |
| 5000 | 1.15 | 0.4000 | 0.6000 | 800  | 2760 | 1800 | 24.05 | 0.3904 | 0.4096 | 0.5904 | 0.6096 | 762 | 2380 | 1858 | 839  | 2418 | 1743 | 64.42  | 51.96  |
| 5000 | 1.16 | 0.4000 | 0.6000 | 800  | 2784 | 1800 | 27.24 | 0.3904 | 0.4096 | 0.5904 | 0.6096 | 762 | 2380 | 1858 | 839  | 2418 | 1743 | 72.33  | 58.98  |
| 5000 | 1.17 | 0.4000 | 0.6000 | 800  | 2808 | 1800 | 30.60 | 0.3904 | 0.4096 | 0.5904 | 0.6096 | 762 | 2380 | 1858 | 839  | 2418 | 1743 | 80.72  | 66.48  |
| 5000 | 1.18 | 0.4000 | 0.6000 | 800  | 2832 | 1800 | 34.15 | 0.3904 | 0.4096 | 0.5904 | 0.6096 | 762 | 2380 | 1858 | 839  | 2418 | 1743 | 89.60  | 74.45  |
| 5000 | 1.19 | 0.4000 | 0.6000 | 800  | 2856 | 1800 | 37.87 | 0.3904 | 0.4096 | 0.5904 | 0.6096 | 762 | 2380 | 1858 | 839  | 2418 | 1743 | 98.96  | 82.90  |
| 5000 | 1.20 | 0.4000 | 0.6000 | 800  | 2880 | 1800 | 41.77 | 0.3904 | 0.4096 | 0.5904 | 0.6096 | 762 | 2380 | 1858 | 839  | 2418 | 1743 | 108.81 | 91.83  |
| 5000 | 0.80 | 0.4500 | 0.5500 | 1013 | 1980 | 1513 | 54.52 | 0.4402 | 0.4598 | 0.5402 | 0.5598 | 969 | 2464 | 1567 | 1057 | 2484 | 1459 | 98.99  | 105.99 |
| 5000 | 0.81 | 0.4500 | 0.5500 | 1013 | 2005 | 1513 | 48.93 | 0.4402 | 0.4598 | 0.5402 | 0.5598 | 969 | 2464 | 1567 | 1057 | 2484 | 1459 | 89.51  | 96.19  |
| 5000 | 0.82 | 0.4500 | 0.5500 | 1013 | 2030 | 1513 | 43.67 | 0.4402 | 0.4598 | 0.5402 | 0.5598 | 969 | 2464 | 1567 | 1057 | 2484 | 1459 | 80.53  | 86.89  |
| 5000 | 0.83 | 0.4500 | 0.5500 | 1013 | 2054 | 1513 | 38.74 | 0.4402 | 0.4598 | 0.5402 | 0.5598 | 969 | 2464 | 1567 | 1057 | 2484 | 1459 | 72.04  | 78.08  |
| 5000 | 0.84 | 0.4500 | 0.5500 | 1013 | 2079 | 1513 | 34.13 | 0.4402 | 0.4598 | 0.5402 | 0.5598 | 969 | 2464 | 1567 | 1057 | 2484 | 1459 | 64.05  | 69.77  |
| 5000 | 0.85 | 0.4500 | 0.5500 | 1013 | 2104 | 1513 | 29.83 | 0.4402 | 0.4598 | 0.5402 | 0.5598 | 969 | 2464 | 1567 | 1057 | 2484 | 1459 | 56.56  | 61.95  |
| 5000 | 0.86 | 0.4500 | 0.5500 | 1013 | 2129 | 1513 | 25.84 | 0.4402 | 0.4598 | 0.5402 | 0.5598 | 969 | 2464 | 1567 | 1057 | 2484 | 1459 | 49.57  | 54.62  |
| 5000 | 0.87 | 0.4500 | 0.5500 | 1013 | 2153 | 1513 | 22.16 | 0.4402 | 0.4598 | 0.5402 | 0.5598 | 969 | 2464 | 1567 | 1057 | 2484 | 1459 | 43.07  | 47.79  |
| 5000 | 0.88 | 0.4500 | 0.5500 | 1013 | 2178 | 1513 | 18.78 | 0.4402 | 0.4598 | 0.5402 | 0.5598 | 969 | 2464 | 1567 | 1057 | 2484 | 1459 | 37.07  | 41.45  |
| 5000 | 0.89 | 0.4500 | 0.5500 | 1013 | 2203 | 1513 | 15.70 | 0.4402 | 0.4598 | 0.5402 | 0.5598 | 969 | 2464 | 1567 | 1057 | 2484 | 1459 | 31.57  | 35.60  |
| 5000 | 0.90 | 0.4500 | 0.5500 | 1013 | 2228 | 1513 | 12.90 | 0.4402 | 0.4598 | 0.5402 | 0.5598 | 969 | 2464 | 1567 | 1057 | 2484 | 1459 | 26.57  | 30.24  |
| 5000 | 0.91 | 0.4500 | 0.5500 | 1013 | 2252 | 1513 | 10.40 | 0.4402 | 0.4598 | 0.5402 | 0.5598 | 969 | 2464 | 1567 | 1057 | 2484 | 1459 | 22.06  | 25.38  |
| 5000 | 0.92 | 0.4500 | 0.5500 | 1013 | 2277 | 1513 | 8.17  | 0.4402 | 0.4598 | 0.5402 | 0.5598 | 969 | 2464 | 1567 | 1057 | 2484 | 1459 | 18.05  | 21.02  |
| 5000 | 0.93 | 0.4500 | 0.5500 | 1013 | 2302 | 1513 | 6.22  | 0.4402 | 0.4598 | 0.5402 | 0.5598 | 969 | 2464 | 1567 | 1057 | 2484 | 1459 | 14.53  | 17.14  |

|      |      |        |        |      |      |      |       |        |        |        |        |      |      |      |      |      |      |        |        |
|------|------|--------|--------|------|------|------|-------|--------|--------|--------|--------|------|------|------|------|------|------|--------|--------|
| 5000 | 0.94 | 0.4500 | 0.5500 | 1013 | 2327 | 1513 | 4.55  | 0.4402 | 0.4598 | 0.5402 | 0.5598 | 969  | 2464 | 1567 | 1057 | 2484 | 1459 | 11.52  | 13.76  |
| 5000 | 0.95 | 0.4500 | 0.5500 | 1013 | 2351 | 1513 | 3.14  | 0.4402 | 0.4598 | 0.5402 | 0.5598 | 969  | 2464 | 1567 | 1057 | 2484 | 1459 | 9.00   | 10.87  |
| 5000 | 0.96 | 0.4500 | 0.5500 | 1013 | 2376 | 1513 | 2.00  | 0.4402 | 0.4598 | 0.5402 | 0.5598 | 969  | 2464 | 1567 | 1057 | 2484 | 1459 | 6.98   | 8.48   |
| 5000 | 0.97 | 0.4500 | 0.5500 | 1013 | 2401 | 1513 | 1.12  | 0.4402 | 0.4598 | 0.5402 | 0.5598 | 969  | 2464 | 1567 | 1057 | 2484 | 1459 | 5.45   | 6.57   |
| 5000 | 0.98 | 0.4500 | 0.5500 | 1013 | 2426 | 1513 | 0.50  | 0.4402 | 0.4598 | 0.5402 | 0.5598 | 969  | 2464 | 1567 | 1057 | 2484 | 1459 | 4.42   | 5.17   |
| 5000 | 0.99 | 0.4500 | 0.5500 | 1013 | 2450 | 1513 | 0.12  | 0.4402 | 0.4598 | 0.5402 | 0.5598 | 969  | 2464 | 1567 | 1057 | 2484 | 1459 | 3.89   | 4.25   |
| 5000 | 1.00 | 0.4500 | 0.5500 | 1013 | 2475 | 1513 | 0.00  | 0.4402 | 0.4598 | 0.5402 | 0.5598 | 969  | 2464 | 1567 | 1057 | 2484 | 1459 | 3.86   | 3.83   |
| 5000 | 1.01 | 0.4500 | 0.5500 | 1013 | 2500 | 1513 | 0.12  | 0.4402 | 0.4598 | 0.5402 | 0.5598 | 969  | 2464 | 1567 | 1057 | 2484 | 1459 | 4.32   | 3.90   |
| 5000 | 1.02 | 0.4500 | 0.5500 | 1013 | 2525 | 1513 | 0.49  | 0.4402 | 0.4598 | 0.5402 | 0.5598 | 969  | 2464 | 1567 | 1057 | 2484 | 1459 | 5.28   | 4.46   |
| 5000 | 1.03 | 0.4500 | 0.5500 | 1013 | 2549 | 1513 | 1.09  | 0.4402 | 0.4598 | 0.5402 | 0.5598 | 969  | 2464 | 1567 | 1057 | 2484 | 1459 | 6.74   | 5.52   |
| 5000 | 1.04 | 0.4500 | 0.5500 | 1013 | 2574 | 1513 | 1.92  | 0.4402 | 0.4598 | 0.5402 | 0.5598 | 969  | 2464 | 1567 | 1057 | 2484 | 1459 | 8.70   | 7.07   |
| 5000 | 1.05 | 0.4500 | 0.5500 | 1013 | 2599 | 1513 | 2.99  | 0.4402 | 0.4598 | 0.5402 | 0.5598 | 969  | 2464 | 1567 | 1057 | 2484 | 1459 | 11.15  | 9.12   |
| 5000 | 1.06 | 0.4500 | 0.5500 | 1013 | 2624 | 1513 | 4.28  | 0.4402 | 0.4598 | 0.5402 | 0.5598 | 969  | 2464 | 1567 | 1057 | 2484 | 1459 | 14.10  | 11.65  |
| 5000 | 1.07 | 0.4500 | 0.5500 | 1013 | 2648 | 1513 | 5.80  | 0.4402 | 0.4598 | 0.5402 | 0.5598 | 969  | 2464 | 1567 | 1057 | 2484 | 1459 | 17.54  | 14.69  |
| 5000 | 1.08 | 0.4500 | 0.5500 | 1013 | 2673 | 1513 | 7.54  | 0.4402 | 0.4598 | 0.5402 | 0.5598 | 969  | 2464 | 1567 | 1057 | 2484 | 1459 | 21.49  | 18.21  |
| 5000 | 1.09 | 0.4500 | 0.5500 | 1013 | 2698 | 1513 | 9.49  | 0.4402 | 0.4598 | 0.5402 | 0.5598 | 969  | 2464 | 1567 | 1057 | 2484 | 1459 | 25.93  | 22.23  |
| 5000 | 1.10 | 0.4500 | 0.5500 | 1013 | 2723 | 1513 | 11.66 | 0.4402 | 0.4598 | 0.5402 | 0.5598 | 969  | 2464 | 1567 | 1057 | 2484 | 1459 | 30.87  | 26.74  |
| 5000 | 1.11 | 0.4500 | 0.5500 | 1013 | 2747 | 1513 | 14.04 | 0.4402 | 0.4598 | 0.5402 | 0.5598 | 969  | 2464 | 1567 | 1057 | 2484 | 1459 | 36.30  | 31.74  |
| 5000 | 1.12 | 0.4500 | 0.5500 | 1013 | 2772 | 1513 | 16.63 | 0.4402 | 0.4598 | 0.5402 | 0.5598 | 969  | 2464 | 1567 | 1057 | 2484 | 1459 | 42.23  | 37.24  |
| 5000 | 1.13 | 0.4500 | 0.5500 | 1013 | 2797 | 1513 | 19.43 | 0.4402 | 0.4598 | 0.5402 | 0.5598 | 969  | 2464 | 1567 | 1057 | 2484 | 1459 | 48.66  | 43.23  |
| 5000 | 1.14 | 0.4500 | 0.5500 | 1013 | 2822 | 1513 | 22.43 | 0.4402 | 0.4598 | 0.5402 | 0.5598 | 969  | 2464 | 1567 | 1057 | 2484 | 1459 | 55.59  | 49.71  |
| 5000 | 1.15 | 0.4500 | 0.5500 | 1013 | 2846 | 1513 | 25.63 | 0.4402 | 0.4598 | 0.5402 | 0.5598 | 969  | 2464 | 1567 | 1057 | 2484 | 1459 | 63.01  | 56.69  |
| 5000 | 1.16 | 0.4500 | 0.5500 | 1013 | 2871 | 1513 | 29.02 | 0.4402 | 0.4598 | 0.5402 | 0.5598 | 969  | 2464 | 1567 | 1057 | 2484 | 1459 | 70.93  | 64.16  |
| 5000 | 1.17 | 0.4500 | 0.5500 | 1013 | 2896 | 1513 | 32.61 | 0.4402 | 0.4598 | 0.5402 | 0.5598 | 969  | 2464 | 1567 | 1057 | 2484 | 1459 | 79.35  | 72.12  |
| 5000 | 1.18 | 0.4500 | 0.5500 | 1013 | 2921 | 1513 | 36.39 | 0.4402 | 0.4598 | 0.5402 | 0.5598 | 969  | 2464 | 1567 | 1057 | 2484 | 1459 | 88.27  | 80.58  |
| 5000 | 1.19 | 0.4500 | 0.5500 | 1013 | 2945 | 1513 | 40.36 | 0.4402 | 0.4598 | 0.5402 | 0.5598 | 969  | 2464 | 1567 | 1057 | 2484 | 1459 | 97.68  | 89.53  |
| 5000 | 1.20 | 0.4500 | 0.5500 | 1013 | 2970 | 1513 | 44.52 | 0.4402 | 0.4598 | 0.5402 | 0.5598 | 969  | 2464 | 1567 | 1057 | 2484 | 1459 | 107.59 | 98.97  |
| 5000 | 0.80 | 0.5000 | 0.5000 | 1250 | 2000 | 1250 | 55.56 | 0.4902 | 0.5098 | 0.4902 | 0.5098 | 1201 | 2499 | 1299 | 1299 | 2499 | 1201 | 103.50 | 103.50 |
| 5000 | 0.81 | 0.5000 | 0.5000 | 1250 | 2025 | 1250 | 49.86 | 0.4902 | 0.5098 | 0.4902 | 0.5098 | 1201 | 2499 | 1299 | 1299 | 2499 | 1201 | 93.76  | 93.76  |
| 5000 | 0.82 | 0.5000 | 0.5000 | 1250 | 2050 | 1250 | 44.51 | 0.4902 | 0.5098 | 0.4902 | 0.5098 | 1201 | 2499 | 1299 | 1299 | 2499 | 1201 | 84.53  | 84.53  |
| 5000 | 0.83 | 0.5000 | 0.5000 | 1250 | 2075 | 1250 | 39.48 | 0.4902 | 0.5098 | 0.4902 | 0.5098 | 1201 | 2499 | 1299 | 1299 | 2499 | 1201 | 75.79  | 75.79  |
| 5000 | 0.84 | 0.5000 | 0.5000 | 1250 | 2100 | 1250 | 34.78 | 0.4902 | 0.5098 | 0.4902 | 0.5098 | 1201 | 2499 | 1299 | 1299 | 2499 | 1201 | 67.56  | 67.56  |
| 5000 | 0.85 | 0.5000 | 0.5000 | 1250 | 2125 | 1250 | 30.41 | 0.4902 | 0.5098 | 0.4902 | 0.5098 | 1201 | 2499 | 1299 | 1299 | 2499 | 1201 | 59.83  | 59.83  |
| 5000 | 0.86 | 0.5000 | 0.5000 | 1250 | 2150 | 1250 | 26.34 | 0.4902 | 0.5098 | 0.4902 | 0.5098 | 1201 | 2499 | 1299 | 1299 | 2499 | 1201 | 52.59  | 52.59  |
| 5000 | 0.87 | 0.5000 | 0.5000 | 1250 | 2175 | 1250 | 22.59 | 0.4902 | 0.5098 | 0.4902 | 0.5098 | 1201 | 2499 | 1299 | 1299 | 2499 | 1201 | 45.86  | 45.86  |

|      |      |        |        |      |      |      |       |        |        |        |        |      |      |      |      |      |      |        |        |
|------|------|--------|--------|------|------|------|-------|--------|--------|--------|--------|------|------|------|------|------|------|--------|--------|
| 5000 | 0.88 | 0.5000 | 0.5000 | 1250 | 2200 | 1250 | 19.15 | 0.4902 | 0.5098 | 0.4902 | 0.5098 | 1201 | 2499 | 1299 | 1299 | 2499 | 1201 | 39.63  | 39.63  |
| 5000 | 0.89 | 0.5000 | 0.5000 | 1250 | 2225 | 1250 | 16.01 | 0.4902 | 0.5098 | 0.4902 | 0.5098 | 1201 | 2499 | 1299 | 1299 | 2499 | 1201 | 33.89  | 33.89  |
| 5000 | 0.90 | 0.5000 | 0.5000 | 1250 | 2250 | 1250 | 13.16 | 0.4902 | 0.5098 | 0.4902 | 0.5098 | 1201 | 2499 | 1299 | 1299 | 2499 | 1201 | 28.66  | 28.66  |
| 5000 | 0.91 | 0.5000 | 0.5000 | 1250 | 2275 | 1250 | 10.60 | 0.4902 | 0.5098 | 0.4902 | 0.5098 | 1201 | 2499 | 1299 | 1299 | 2499 | 1201 | 23.93  | 23.93  |
| 5000 | 0.92 | 0.5000 | 0.5000 | 1250 | 2300 | 1250 | 8.33  | 0.4902 | 0.5098 | 0.4902 | 0.5098 | 1201 | 2499 | 1299 | 1299 | 2499 | 1201 | 19.70  | 19.70  |
| 5000 | 0.93 | 0.5000 | 0.5000 | 1250 | 2325 | 1250 | 6.35  | 0.4902 | 0.5098 | 0.4902 | 0.5098 | 1201 | 2499 | 1299 | 1299 | 2499 | 1201 | 15.96  | 15.96  |
| 5000 | 0.94 | 0.5000 | 0.5000 | 1250 | 2350 | 1250 | 4.64  | 0.4902 | 0.5098 | 0.4902 | 0.5098 | 1201 | 2499 | 1299 | 1299 | 2499 | 1201 | 12.73  | 12.73  |
| 5000 | 0.95 | 0.5000 | 0.5000 | 1250 | 2375 | 1250 | 3.21  | 0.4902 | 0.5098 | 0.4902 | 0.5098 | 1201 | 2499 | 1299 | 1299 | 2499 | 1201 | 10.00  | 10.00  |
| 5000 | 0.96 | 0.5000 | 0.5000 | 1250 | 2400 | 1250 | 2.04  | 0.4902 | 0.5098 | 0.4902 | 0.5098 | 1201 | 2499 | 1299 | 1299 | 2499 | 1201 | 7.77   | 7.77   |
| 5000 | 0.97 | 0.5000 | 0.5000 | 1250 | 2425 | 1250 | 1.14  | 0.4902 | 0.5098 | 0.4902 | 0.5098 | 1201 | 2499 | 1299 | 1299 | 2499 | 1201 | 6.04   | 6.04   |
| 5000 | 0.98 | 0.5000 | 0.5000 | 1250 | 2450 | 1250 | 0.51  | 0.4902 | 0.5098 | 0.4902 | 0.5098 | 1201 | 2499 | 1299 | 1299 | 2499 | 1201 | 4.81   | 4.81   |
| 5000 | 0.99 | 0.5000 | 0.5000 | 1250 | 2475 | 1250 | 0.13  | 0.4902 | 0.5098 | 0.4902 | 0.5098 | 1201 | 2499 | 1299 | 1299 | 2499 | 1201 | 4.07   | 4.07   |
| 5000 | 1.00 | 0.5000 | 0.5000 | 1250 | 2500 | 1250 | 0.00  | 0.4902 | 0.5098 | 0.4902 | 0.5098 | 1201 | 2499 | 1299 | 1299 | 2499 | 1201 | 3.84   | 3.84   |
| 5000 | 1.01 | 0.5000 | 0.5000 | 1250 | 2525 | 1250 | 0.12  | 0.4902 | 0.5098 | 0.4902 | 0.5098 | 1201 | 2499 | 1299 | 1299 | 2499 | 1201 | 4.11   | 4.11   |
| 5000 | 1.02 | 0.5000 | 0.5000 | 1250 | 2550 | 1250 | 0.50  | 0.4902 | 0.5098 | 0.4902 | 0.5098 | 1201 | 2499 | 1299 | 1299 | 2499 | 1201 | 4.88   | 4.88   |
| 5000 | 1.03 | 0.5000 | 0.5000 | 1250 | 2575 | 1250 | 1.11  | 0.4902 | 0.5098 | 0.4902 | 0.5098 | 1201 | 2499 | 1299 | 1299 | 2499 | 1201 | 6.15   | 6.15   |
| 5000 | 1.04 | 0.5000 | 0.5000 | 1250 | 2600 | 1250 | 1.96  | 0.4902 | 0.5098 | 0.4902 | 0.5098 | 1201 | 2499 | 1299 | 1299 | 2499 | 1201 | 7.92   | 7.92   |
| 5000 | 1.05 | 0.5000 | 0.5000 | 1250 | 2625 | 1250 | 3.05  | 0.4902 | 0.5098 | 0.4902 | 0.5098 | 1201 | 2499 | 1299 | 1299 | 2499 | 1201 | 10.19  | 10.19  |
| 5000 | 1.06 | 0.5000 | 0.5000 | 1250 | 2650 | 1250 | 4.37  | 0.4902 | 0.5098 | 0.4902 | 0.5098 | 1201 | 2499 | 1299 | 1299 | 2499 | 1201 | 12.96  | 12.96  |
| 5000 | 1.07 | 0.5000 | 0.5000 | 1250 | 2675 | 1250 | 5.92  | 0.4902 | 0.5098 | 0.4902 | 0.5098 | 1201 | 2499 | 1299 | 1299 | 2499 | 1201 | 16.23  | 16.23  |
| 5000 | 1.08 | 0.5000 | 0.5000 | 1250 | 2700 | 1250 | 7.69  | 0.4902 | 0.5098 | 0.4902 | 0.5098 | 1201 | 2499 | 1299 | 1299 | 2499 | 1201 | 20.00  | 20.00  |
| 5000 | 1.09 | 0.5000 | 0.5000 | 1250 | 2725 | 1250 | 9.69  | 0.4902 | 0.5098 | 0.4902 | 0.5098 | 1201 | 2499 | 1299 | 1299 | 2499 | 1201 | 24.27  | 24.27  |
| 5000 | 1.10 | 0.5000 | 0.5000 | 1250 | 2750 | 1250 | 11.90 | 0.4902 | 0.5098 | 0.4902 | 0.5098 | 1201 | 2499 | 1299 | 1299 | 2499 | 1201 | 29.05  | 29.05  |
| 5000 | 1.11 | 0.5000 | 0.5000 | 1250 | 2775 | 1250 | 14.34 | 0.4902 | 0.5098 | 0.4902 | 0.5098 | 1201 | 2499 | 1299 | 1299 | 2499 | 1201 | 34.32  | 34.32  |
| 5000 | 1.12 | 0.5000 | 0.5000 | 1250 | 2800 | 1250 | 16.98 | 0.4902 | 0.5098 | 0.4902 | 0.5098 | 1201 | 2499 | 1299 | 1299 | 2499 | 1201 | 40.09  | 40.09  |
| 5000 | 1.13 | 0.5000 | 0.5000 | 1250 | 2825 | 1250 | 19.84 | 0.4902 | 0.5098 | 0.4902 | 0.5098 | 1201 | 2499 | 1299 | 1299 | 2499 | 1201 | 46.36  | 46.36  |
| 5000 | 1.14 | 0.5000 | 0.5000 | 1250 | 2850 | 1250 | 22.90 | 0.4902 | 0.5098 | 0.4902 | 0.5098 | 1201 | 2499 | 1299 | 1299 | 2499 | 1201 | 53.13  | 53.13  |
| 5000 | 1.15 | 0.5000 | 0.5000 | 1250 | 2875 | 1250 | 26.16 | 0.4902 | 0.5098 | 0.4902 | 0.5098 | 1201 | 2499 | 1299 | 1299 | 2499 | 1201 | 60.40  | 60.40  |
| 5000 | 1.16 | 0.5000 | 0.5000 | 1250 | 2900 | 1250 | 29.63 | 0.4902 | 0.5098 | 0.4902 | 0.5098 | 1201 | 2499 | 1299 | 1299 | 2499 | 1201 | 68.18  | 68.18  |
| 5000 | 1.17 | 0.5000 | 0.5000 | 1250 | 2925 | 1250 | 33.29 | 0.4902 | 0.5098 | 0.4902 | 0.5098 | 1201 | 2499 | 1299 | 1299 | 2499 | 1201 | 76.45  | 76.45  |
| 5000 | 1.18 | 0.5000 | 0.5000 | 1250 | 2950 | 1250 | 37.16 | 0.4902 | 0.5098 | 0.4902 | 0.5098 | 1201 | 2499 | 1299 | 1299 | 2499 | 1201 | 85.22  | 85.22  |
| 5000 | 1.19 | 0.5000 | 0.5000 | 1250 | 2975 | 1250 | 41.21 | 0.4902 | 0.5098 | 0.4902 | 0.5098 | 1201 | 2499 | 1299 | 1299 | 2499 | 1201 | 94.49  | 94.49  |
| 5000 | 1.20 | 0.5000 | 0.5000 | 1250 | 3000 | 1250 | 45.45 | 0.4902 | 0.5098 | 0.4902 | 0.5098 | 1201 | 2499 | 1299 | 1299 | 2499 | 1201 | 104.27 | 104.27 |
| 5000 | 0.80 | 0.5500 | 0.4500 | 1513 | 1980 | 1013 | 54.52 | 0.5402 | 0.5598 | 0.4402 | 0.4598 | 1459 | 2484 | 1057 | 1567 | 2464 | 969  | 105.99 | 98.99  |
| 5000 | 0.81 | 0.5500 | 0.4500 | 1513 | 2005 | 1013 | 48.93 | 0.5402 | 0.5598 | 0.4402 | 0.4598 | 1459 | 2484 | 1057 | 1567 | 2464 | 969  | 96.19  | 89.51  |

|      |      |        |        |      |      |      |       |        |        |        |        |      |      |      |      |      |     |       |       |
|------|------|--------|--------|------|------|------|-------|--------|--------|--------|--------|------|------|------|------|------|-----|-------|-------|
| 5000 | 0.82 | 0.5500 | 0.4500 | 1513 | 2030 | 1013 | 43.67 | 0.5402 | 0.5598 | 0.4402 | 0.4598 | 1459 | 2484 | 1057 | 1567 | 2464 | 969 | 86.89 | 80.53 |
| 5000 | 0.83 | 0.5500 | 0.4500 | 1513 | 2054 | 1013 | 38.74 | 0.5402 | 0.5598 | 0.4402 | 0.4598 | 1459 | 2484 | 1057 | 1567 | 2464 | 969 | 78.08 | 72.04 |
| 5000 | 0.84 | 0.5500 | 0.4500 | 1513 | 2079 | 1013 | 34.13 | 0.5402 | 0.5598 | 0.4402 | 0.4598 | 1459 | 2484 | 1057 | 1567 | 2464 | 969 | 69.77 | 64.05 |
| 5000 | 0.85 | 0.5500 | 0.4500 | 1513 | 2104 | 1013 | 29.83 | 0.5402 | 0.5598 | 0.4402 | 0.4598 | 1459 | 2484 | 1057 | 1567 | 2464 | 969 | 61.95 | 56.56 |
| 5000 | 0.86 | 0.5500 | 0.4500 | 1513 | 2129 | 1013 | 25.84 | 0.5402 | 0.5598 | 0.4402 | 0.4598 | 1459 | 2484 | 1057 | 1567 | 2464 | 969 | 54.62 | 49.57 |
| 5000 | 0.87 | 0.5500 | 0.4500 | 1513 | 2153 | 1013 | 22.16 | 0.5402 | 0.5598 | 0.4402 | 0.4598 | 1459 | 2484 | 1057 | 1567 | 2464 | 969 | 47.79 | 43.07 |
| 5000 | 0.88 | 0.5500 | 0.4500 | 1513 | 2178 | 1013 | 18.78 | 0.5402 | 0.5598 | 0.4402 | 0.4598 | 1459 | 2484 | 1057 | 1567 | 2464 | 969 | 41.45 | 37.07 |
| 5000 | 0.89 | 0.5500 | 0.4500 | 1513 | 2203 | 1013 | 15.70 | 0.5402 | 0.5598 | 0.4402 | 0.4598 | 1459 | 2484 | 1057 | 1567 | 2464 | 969 | 35.60 | 31.57 |
| 5000 | 0.90 | 0.5500 | 0.4500 | 1513 | 2228 | 1013 | 12.90 | 0.5402 | 0.5598 | 0.4402 | 0.4598 | 1459 | 2484 | 1057 | 1567 | 2464 | 969 | 30.24 | 26.57 |
| 5000 | 0.91 | 0.5500 | 0.4500 | 1513 | 2252 | 1013 | 10.40 | 0.5402 | 0.5598 | 0.4402 | 0.4598 | 1459 | 2484 | 1057 | 1567 | 2464 | 969 | 25.38 | 22.06 |
| 5000 | 0.92 | 0.5500 | 0.4500 | 1513 | 2277 | 1013 | 8.17  | 0.5402 | 0.5598 | 0.4402 | 0.4598 | 1459 | 2484 | 1057 | 1567 | 2464 | 969 | 21.02 | 18.05 |
| 5000 | 0.93 | 0.5500 | 0.4500 | 1513 | 2302 | 1013 | 6.22  | 0.5402 | 0.5598 | 0.4402 | 0.4598 | 1459 | 2484 | 1057 | 1567 | 2464 | 969 | 17.14 | 14.53 |
| 5000 | 0.94 | 0.5500 | 0.4500 | 1513 | 2327 | 1013 | 4.55  | 0.5402 | 0.5598 | 0.4402 | 0.4598 | 1459 | 2484 | 1057 | 1567 | 2464 | 969 | 13.76 | 11.52 |
| 5000 | 0.95 | 0.5500 | 0.4500 | 1513 | 2351 | 1013 | 3.14  | 0.5402 | 0.5598 | 0.4402 | 0.4598 | 1459 | 2484 | 1057 | 1567 | 2464 | 969 | 10.87 | 9.00  |
| 5000 | 0.96 | 0.5500 | 0.4500 | 1513 | 2376 | 1013 | 2.00  | 0.5402 | 0.5598 | 0.4402 | 0.4598 | 1459 | 2484 | 1057 | 1567 | 2464 | 969 | 8.48  | 6.98  |
| 5000 | 0.97 | 0.5500 | 0.4500 | 1513 | 2401 | 1013 | 1.12  | 0.5402 | 0.5598 | 0.4402 | 0.4598 | 1459 | 2484 | 1057 | 1567 | 2464 | 969 | 6.57  | 5.45  |
| 5000 | 0.98 | 0.5500 | 0.4500 | 1513 | 2426 | 1013 | 0.50  | 0.5402 | 0.5598 | 0.4402 | 0.4598 | 1459 | 2484 | 1057 | 1567 | 2464 | 969 | 5.17  | 4.42  |
| 5000 | 0.99 | 0.5500 | 0.4500 | 1513 | 2450 | 1013 | 0.12  | 0.5402 | 0.5598 | 0.4402 | 0.4598 | 1459 | 2484 | 1057 | 1567 | 2464 | 969 | 4.25  | 3.89  |
| 5000 | 1.00 | 0.5500 | 0.4500 | 1513 | 2475 | 1013 | 0.00  | 0.5402 | 0.5598 | 0.4402 | 0.4598 | 1459 | 2484 | 1057 | 1567 | 2464 | 969 | 3.83  | 3.86  |
| 5000 | 1.01 | 0.5500 | 0.4500 | 1513 | 2500 | 1013 | 0.12  | 0.5402 | 0.5598 | 0.4402 | 0.4598 | 1459 | 2484 | 1057 | 1567 | 2464 | 969 | 3.90  | 4.32  |
| 5000 | 1.02 | 0.5500 | 0.4500 | 1513 | 2525 | 1013 | 0.49  | 0.5402 | 0.5598 | 0.4402 | 0.4598 | 1459 | 2484 | 1057 | 1567 | 2464 | 969 | 4.46  | 5.28  |
| 5000 | 1.03 | 0.5500 | 0.4500 | 1513 | 2549 | 1013 | 1.09  | 0.5402 | 0.5598 | 0.4402 | 0.4598 | 1459 | 2484 | 1057 | 1567 | 2464 | 969 | 5.52  | 6.74  |
| 5000 | 1.04 | 0.5500 | 0.4500 | 1513 | 2574 | 1013 | 1.92  | 0.5402 | 0.5598 | 0.4402 | 0.4598 | 1459 | 2484 | 1057 | 1567 | 2464 | 969 | 7.07  | 8.70  |
| 5000 | 1.05 | 0.5500 | 0.4500 | 1513 | 2599 | 1013 | 2.99  | 0.5402 | 0.5598 | 0.4402 | 0.4598 | 1459 | 2484 | 1057 | 1567 | 2464 | 969 | 9.12  | 11.15 |
| 5000 | 1.06 | 0.5500 | 0.4500 | 1513 | 2624 | 1013 | 4.28  | 0.5402 | 0.5598 | 0.4402 | 0.4598 | 1459 | 2484 | 1057 | 1567 | 2464 | 969 | 11.65 | 14.10 |
| 5000 | 1.07 | 0.5500 | 0.4500 | 1513 | 2648 | 1013 | 5.80  | 0.5402 | 0.5598 | 0.4402 | 0.4598 | 1459 | 2484 | 1057 | 1567 | 2464 | 969 | 14.69 | 17.54 |
| 5000 | 1.08 | 0.5500 | 0.4500 | 1513 | 2673 | 1013 | 7.54  | 0.5402 | 0.5598 | 0.4402 | 0.4598 | 1459 | 2484 | 1057 | 1567 | 2464 | 969 | 18.21 | 21.49 |
| 5000 | 1.09 | 0.5500 | 0.4500 | 1513 | 2698 | 1013 | 9.49  | 0.5402 | 0.5598 | 0.4402 | 0.4598 | 1459 | 2484 | 1057 | 1567 | 2464 | 969 | 22.23 | 25.93 |
| 5000 | 1.10 | 0.5500 | 0.4500 | 1513 | 2723 | 1013 | 11.66 | 0.5402 | 0.5598 | 0.4402 | 0.4598 | 1459 | 2484 | 1057 | 1567 | 2464 | 969 | 26.74 | 30.87 |
| 5000 | 1.11 | 0.5500 | 0.4500 | 1513 | 2747 | 1013 | 14.04 | 0.5402 | 0.5598 | 0.4402 | 0.4598 | 1459 | 2484 | 1057 | 1567 | 2464 | 969 | 31.74 | 36.30 |
| 5000 | 1.12 | 0.5500 | 0.4500 | 1513 | 2772 | 1013 | 16.63 | 0.5402 | 0.5598 | 0.4402 | 0.4598 | 1459 | 2484 | 1057 | 1567 | 2464 | 969 | 37.24 | 42.23 |
| 5000 | 1.13 | 0.5500 | 0.4500 | 1513 | 2797 | 1013 | 19.43 | 0.5402 | 0.5598 | 0.4402 | 0.4598 | 1459 | 2484 | 1057 | 1567 | 2464 | 969 | 43.23 | 48.66 |
| 5000 | 1.14 | 0.5500 | 0.4500 | 1513 | 2822 | 1013 | 22.43 | 0.5402 | 0.5598 | 0.4402 | 0.4598 | 1459 | 2484 | 1057 | 1567 | 2464 | 969 | 49.71 | 55.59 |
| 5000 | 1.15 | 0.5500 | 0.4500 | 1513 | 2846 | 1013 | 25.63 | 0.5402 | 0.5598 | 0.4402 | 0.4598 | 1459 | 2484 | 1057 | 1567 | 2464 | 969 | 56.69 | 63.01 |
| 5000 | 1.16 | 0.5500 | 0.4500 | 1513 | 2871 | 1013 | 29.02 | 0.5402 | 0.5598 | 0.4402 | 0.4598 | 1459 | 2484 | 1057 | 1567 | 2464 | 969 | 64.16 | 70.93 |

|      |      |        |        |      |      |      |       |        |        |        |        |      |      |      |      |      |     |        |        |
|------|------|--------|--------|------|------|------|-------|--------|--------|--------|--------|------|------|------|------|------|-----|--------|--------|
| 5000 | 1.17 | 0.5500 | 0.4500 | 1513 | 2896 | 1013 | 32.61 | 0.5402 | 0.5598 | 0.4402 | 0.4598 | 1459 | 2484 | 1057 | 1567 | 2464 | 969 | 72.12  | 79.35  |
| 5000 | 1.18 | 0.5500 | 0.4500 | 1513 | 2921 | 1013 | 36.39 | 0.5402 | 0.5598 | 0.4402 | 0.4598 | 1459 | 2484 | 1057 | 1567 | 2464 | 969 | 80.58  | 88.27  |
| 5000 | 1.19 | 0.5500 | 0.4500 | 1513 | 2945 | 1013 | 40.36 | 0.5402 | 0.5598 | 0.4402 | 0.4598 | 1459 | 2484 | 1057 | 1567 | 2464 | 969 | 89.53  | 97.68  |
| 5000 | 1.20 | 0.5500 | 0.4500 | 1513 | 2970 | 1013 | 44.52 | 0.5402 | 0.5598 | 0.4402 | 0.4598 | 1459 | 2484 | 1057 | 1567 | 2464 | 969 | 98.97  | 107.59 |
| 5000 | 0.80 | 0.6000 | 0.4000 | 1800 | 1920 | 800  | 51.48 | 0.5904 | 0.6096 | 0.3904 | 0.4096 | 1743 | 2418 | 839  | 1858 | 2380 | 762 | 106.35 | 92.57  |
| 5000 | 0.81 | 0.6000 | 0.4000 | 1800 | 1944 | 800  | 46.19 | 0.5904 | 0.6096 | 0.3904 | 0.4096 | 1743 | 2418 | 839  | 1858 | 2380 | 762 | 96.69  | 83.53  |
| 5000 | 0.82 | 0.6000 | 0.4000 | 1800 | 1968 | 800  | 41.21 | 0.5904 | 0.6096 | 0.3904 | 0.4096 | 1743 | 2418 | 839  | 1858 | 2380 | 762 | 87.52  | 74.99  |
| 5000 | 0.83 | 0.6000 | 0.4000 | 1800 | 1992 | 800  | 36.55 | 0.5904 | 0.6096 | 0.3904 | 0.4096 | 1743 | 2418 | 839  | 1858 | 2380 | 762 | 78.82  | 66.92  |
| 5000 | 0.84 | 0.6000 | 0.4000 | 1800 | 2016 | 800  | 32.19 | 0.5904 | 0.6096 | 0.3904 | 0.4096 | 1743 | 2418 | 839  | 1858 | 2380 | 762 | 70.59  | 59.34  |
| 5000 | 0.85 | 0.6000 | 0.4000 | 1800 | 2040 | 800  | 28.13 | 0.5904 | 0.6096 | 0.3904 | 0.4096 | 1743 | 2418 | 839  | 1858 | 2380 | 762 | 62.85  | 52.24  |
| 5000 | 0.86 | 0.6000 | 0.4000 | 1800 | 2064 | 800  | 24.36 | 0.5904 | 0.6096 | 0.3904 | 0.4096 | 1743 | 2418 | 839  | 1858 | 2380 | 762 | 55.58  | 45.63  |
| 5000 | 0.87 | 0.6000 | 0.4000 | 1800 | 2088 | 800  | 20.89 | 0.5904 | 0.6096 | 0.3904 | 0.4096 | 1743 | 2418 | 839  | 1858 | 2380 | 762 | 48.78  | 39.50  |
| 5000 | 0.88 | 0.6000 | 0.4000 | 1800 | 2112 | 800  | 17.70 | 0.5904 | 0.6096 | 0.3904 | 0.4096 | 1743 | 2418 | 839  | 1858 | 2380 | 762 | 42.47  | 33.86  |
| 5000 | 0.89 | 0.6000 | 0.4000 | 1800 | 2136 | 800  | 14.79 | 0.5904 | 0.6096 | 0.3904 | 0.4096 | 1743 | 2418 | 839  | 1858 | 2380 | 762 | 36.63  | 28.70  |
| 5000 | 0.90 | 0.6000 | 0.4000 | 1800 | 2160 | 800  | 12.15 | 0.5904 | 0.6096 | 0.3904 | 0.4096 | 1743 | 2418 | 839  | 1858 | 2380 | 762 | 31.26  | 24.02  |
| 5000 | 0.91 | 0.6000 | 0.4000 | 1800 | 2184 | 800  | 9.79  | 0.5904 | 0.6096 | 0.3904 | 0.4096 | 1743 | 2418 | 839  | 1858 | 2380 | 762 | 26.37  | 19.83  |
| 5000 | 0.92 | 0.6000 | 0.4000 | 1800 | 2208 | 800  | 7.69  | 0.5904 | 0.6096 | 0.3904 | 0.4096 | 1743 | 2418 | 839  | 1858 | 2380 | 762 | 21.96  | 16.12  |
| 5000 | 0.93 | 0.6000 | 0.4000 | 1800 | 2232 | 800  | 5.86  | 0.5904 | 0.6096 | 0.3904 | 0.4096 | 1743 | 2418 | 839  | 1858 | 2380 | 762 | 18.02  | 12.89  |
| 5000 | 0.94 | 0.6000 | 0.4000 | 1800 | 2256 | 800  | 4.28  | 0.5904 | 0.6096 | 0.3904 | 0.4096 | 1743 | 2418 | 839  | 1858 | 2380 | 762 | 14.57  | 10.15  |
| 5000 | 0.95 | 0.6000 | 0.4000 | 1800 | 2280 | 800  | 2.96  | 0.5904 | 0.6096 | 0.3904 | 0.4096 | 1743 | 2418 | 839  | 1858 | 2380 | 762 | 11.58  | 7.90   |
| 5000 | 0.96 | 0.6000 | 0.4000 | 1800 | 2304 | 800  | 1.88  | 0.5904 | 0.6096 | 0.3904 | 0.4096 | 1743 | 2418 | 839  | 1858 | 2380 | 762 | 9.08   | 6.12   |
| 5000 | 0.97 | 0.6000 | 0.4000 | 1800 | 2328 | 800  | 1.05  | 0.5904 | 0.6096 | 0.3904 | 0.4096 | 1743 | 2418 | 839  | 1858 | 2380 | 762 | 7.05   | 4.84   |
| 5000 | 0.98 | 0.6000 | 0.4000 | 1800 | 2352 | 800  | 0.47  | 0.5904 | 0.6096 | 0.3904 | 0.4096 | 1743 | 2418 | 839  | 1858 | 2380 | 762 | 5.49   | 4.03   |
| 5000 | 0.99 | 0.6000 | 0.4000 | 1800 | 2376 | 800  | 0.12  | 0.5904 | 0.6096 | 0.3904 | 0.4096 | 1743 | 2418 | 839  | 1858 | 2380 | 762 | 4.41   | 3.71   |
| 5000 | 1.00 | 0.6000 | 0.4000 | 1800 | 2400 | 800  | 0.00  | 0.5904 | 0.6096 | 0.3904 | 0.4096 | 1743 | 2418 | 839  | 1858 | 2380 | 762 | 3.81   | 3.87   |
| 5000 | 1.01 | 0.6000 | 0.4000 | 1800 | 2424 | 800  | 0.11  | 0.5904 | 0.6096 | 0.3904 | 0.4096 | 1743 | 2418 | 839  | 1858 | 2380 | 762 | 3.69   | 4.52   |
| 5000 | 1.02 | 0.6000 | 0.4000 | 1800 | 2448 | 800  | 0.46  | 0.5904 | 0.6096 | 0.3904 | 0.4096 | 1743 | 2418 | 839  | 1858 | 2380 | 762 | 4.04   | 5.65   |
| 5000 | 1.03 | 0.6000 | 0.4000 | 1800 | 2472 | 800  | 1.02  | 0.5904 | 0.6096 | 0.3904 | 0.4096 | 1743 | 2418 | 839  | 1858 | 2380 | 762 | 4.87   | 7.27   |
| 5000 | 1.04 | 0.6000 | 0.4000 | 1800 | 2496 | 800  | 1.81  | 0.5904 | 0.6096 | 0.3904 | 0.4096 | 1743 | 2418 | 839  | 1858 | 2380 | 762 | 6.17   | 9.37   |
| 5000 | 1.05 | 0.6000 | 0.4000 | 1800 | 2520 | 800  | 2.81  | 0.5904 | 0.6096 | 0.3904 | 0.4096 | 1743 | 2418 | 839  | 1858 | 2380 | 762 | 7.95   | 11.96  |
| 5000 | 1.06 | 0.6000 | 0.4000 | 1800 | 2544 | 800  | 4.02  | 0.5904 | 0.6096 | 0.3904 | 0.4096 | 1743 | 2418 | 839  | 1858 | 2380 | 762 | 10.21  | 15.02  |
| 5000 | 1.07 | 0.6000 | 0.4000 | 1800 | 2568 | 800  | 5.45  | 0.5904 | 0.6096 | 0.3904 | 0.4096 | 1743 | 2418 | 839  | 1858 | 2380 | 762 | 12.94  | 18.58  |
| 5000 | 1.08 | 0.6000 | 0.4000 | 1800 | 2592 | 800  | 7.08  | 0.5904 | 0.6096 | 0.3904 | 0.4096 | 1743 | 2418 | 839  | 1858 | 2380 | 762 | 16.15  | 22.61  |
| 5000 | 1.09 | 0.6000 | 0.4000 | 1800 | 2616 | 800  | 8.92  | 0.5904 | 0.6096 | 0.3904 | 0.4096 | 1743 | 2418 | 839  | 1858 | 2380 | 762 | 19.84  | 27.13  |
| 5000 | 1.10 | 0.6000 | 0.4000 | 1800 | 2640 | 800  | 10.95 | 0.5904 | 0.6096 | 0.3904 | 0.4096 | 1743 | 2418 | 839  | 1858 | 2380 | 762 | 24.00  | 32.14  |

|      |      |        |        |      |      |     |       |        |        |        |        |      |      |     |      |      |     |        |        |
|------|------|--------|--------|------|------|-----|-------|--------|--------|--------|--------|------|------|-----|------|------|-----|--------|--------|
| 5000 | 1.11 | 0.6000 | 0.4000 | 1800 | 2664 | 800 | 13.19 | 0.5904 | 0.6096 | 0.3904 | 0.4096 | 1743 | 2418 | 839 | 1858 | 2380 | 762 | 28.64  | 37.63  |
| 5000 | 1.12 | 0.6000 | 0.4000 | 1800 | 2688 | 800 | 15.62 | 0.5904 | 0.6096 | 0.3904 | 0.4096 | 1743 | 2418 | 839 | 1858 | 2380 | 762 | 33.76  | 43.60  |
| 5000 | 1.13 | 0.6000 | 0.4000 | 1800 | 2712 | 800 | 18.24 | 0.5904 | 0.6096 | 0.3904 | 0.4096 | 1743 | 2418 | 839 | 1858 | 2380 | 762 | 39.35  | 50.05  |
| 5000 | 1.14 | 0.6000 | 0.4000 | 1800 | 2736 | 800 | 21.05 | 0.5904 | 0.6096 | 0.3904 | 0.4096 | 1743 | 2418 | 839 | 1858 | 2380 | 762 | 45.42  | 57.00  |
| 5000 | 1.15 | 0.6000 | 0.4000 | 1800 | 2760 | 800 | 24.05 | 0.5904 | 0.6096 | 0.3904 | 0.4096 | 1743 | 2418 | 839 | 1858 | 2380 | 762 | 51.96  | 64.42  |
| 5000 | 1.16 | 0.6000 | 0.4000 | 1800 | 2784 | 800 | 27.24 | 0.5904 | 0.6096 | 0.3904 | 0.4096 | 1743 | 2418 | 839 | 1858 | 2380 | 762 | 58.98  | 72.33  |
| 5000 | 1.17 | 0.6000 | 0.4000 | 1800 | 2808 | 800 | 30.60 | 0.5904 | 0.6096 | 0.3904 | 0.4096 | 1743 | 2418 | 839 | 1858 | 2380 | 762 | 66.48  | 80.72  |
| 5000 | 1.18 | 0.6000 | 0.4000 | 1800 | 2832 | 800 | 34.15 | 0.5904 | 0.6096 | 0.3904 | 0.4096 | 1743 | 2418 | 839 | 1858 | 2380 | 762 | 74.45  | 89.60  |
| 5000 | 1.19 | 0.6000 | 0.4000 | 1800 | 2856 | 800 | 37.87 | 0.5904 | 0.6096 | 0.3904 | 0.4096 | 1743 | 2418 | 839 | 1858 | 2380 | 762 | 82.90  | 98.96  |
| 5000 | 1.20 | 0.6000 | 0.4000 | 1800 | 2880 | 800 | 41.77 | 0.5904 | 0.6096 | 0.3904 | 0.4096 | 1743 | 2418 | 839 | 1858 | 2380 | 762 | 91.83  | 108.81 |
| 5000 | 0.80 | 0.6500 | 0.3500 | 2113 | 1820 | 613 | 46.57 | 0.6407 | 0.6593 | 0.3407 | 0.3593 | 2052 | 2302 | 646 | 2174 | 2246 | 580 | 104.46 | 84.35  |
| 5000 | 0.81 | 0.6500 | 0.3500 | 2113 | 1843 | 613 | 41.76 | 0.6407 | 0.6593 | 0.3407 | 0.3593 | 2052 | 2302 | 646 | 2174 | 2246 | 580 | 95.16  | 75.95  |
| 5000 | 0.82 | 0.6500 | 0.3500 | 2113 | 1866 | 613 | 37.25 | 0.6407 | 0.6593 | 0.3407 | 0.3593 | 2052 | 2302 | 646 | 2174 | 2246 | 580 | 86.30  | 68.01  |
| 5000 | 0.83 | 0.6500 | 0.3500 | 2113 | 1888 | 613 | 33.02 | 0.6407 | 0.6593 | 0.3407 | 0.3593 | 2052 | 2302 | 646 | 2174 | 2246 | 580 | 77.90  | 60.53  |
| 5000 | 0.84 | 0.6500 | 0.3500 | 2113 | 1911 | 613 | 29.07 | 0.6407 | 0.6593 | 0.3407 | 0.3593 | 2052 | 2302 | 646 | 2174 | 2246 | 580 | 69.94  | 53.51  |
| 5000 | 0.85 | 0.6500 | 0.3500 | 2113 | 1934 | 613 | 25.39 | 0.6407 | 0.6593 | 0.3407 | 0.3593 | 2052 | 2302 | 646 | 2174 | 2246 | 580 | 62.44  | 46.95  |
| 5000 | 0.86 | 0.6500 | 0.3500 | 2113 | 1957 | 613 | 21.99 | 0.6407 | 0.6593 | 0.3407 | 0.3593 | 2052 | 2302 | 646 | 2174 | 2246 | 580 | 55.38  | 40.85  |
| 5000 | 0.87 | 0.6500 | 0.3500 | 2113 | 1979 | 613 | 18.84 | 0.6407 | 0.6593 | 0.3407 | 0.3593 | 2052 | 2302 | 646 | 2174 | 2246 | 580 | 48.77  | 35.22  |
| 5000 | 0.88 | 0.6500 | 0.3500 | 2113 | 2002 | 613 | 15.96 | 0.6407 | 0.6593 | 0.3407 | 0.3593 | 2052 | 2302 | 646 | 2174 | 2246 | 580 | 42.61  | 30.04  |
| 5000 | 0.89 | 0.6500 | 0.3500 | 2113 | 2025 | 613 | 13.33 | 0.6407 | 0.6593 | 0.3407 | 0.3593 | 2052 | 2302 | 646 | 2174 | 2246 | 580 | 36.91  | 25.33  |
| 5000 | 0.90 | 0.6500 | 0.3500 | 2113 | 2048 | 613 | 10.95 | 0.6407 | 0.6593 | 0.3407 | 0.3593 | 2052 | 2302 | 646 | 2174 | 2246 | 580 | 31.65  | 21.08  |
| 5000 | 0.91 | 0.6500 | 0.3500 | 2113 | 2070 | 613 | 8.82  | 0.6407 | 0.6593 | 0.3407 | 0.3593 | 2052 | 2302 | 646 | 2174 | 2246 | 580 | 26.84  | 17.28  |
| 5000 | 0.92 | 0.6500 | 0.3500 | 2113 | 2093 | 613 | 6.93  | 0.6407 | 0.6593 | 0.3407 | 0.3593 | 2052 | 2302 | 646 | 2174 | 2246 | 580 | 22.48  | 13.95  |
| 5000 | 0.93 | 0.6500 | 0.3500 | 2113 | 2116 | 613 | 5.27  | 0.6407 | 0.6593 | 0.3407 | 0.3593 | 2052 | 2302 | 646 | 2174 | 2246 | 580 | 18.57  | 11.08  |
| 5000 | 0.94 | 0.6500 | 0.3500 | 2113 | 2139 | 613 | 3.85  | 0.6407 | 0.6593 | 0.3407 | 0.3593 | 2052 | 2302 | 646 | 2174 | 2246 | 580 | 15.11  | 8.67   |
| 5000 | 0.95 | 0.6500 | 0.3500 | 2113 | 2161 | 613 | 2.66  | 0.6407 | 0.6593 | 0.3407 | 0.3593 | 2052 | 2302 | 646 | 2174 | 2246 | 580 | 12.10  | 6.72   |
| 5000 | 0.96 | 0.6500 | 0.3500 | 2113 | 2184 | 613 | 1.69  | 0.6407 | 0.6593 | 0.3407 | 0.3593 | 2052 | 2302 | 646 | 2174 | 2246 | 580 | 9.54   | 5.24   |
| 5000 | 0.97 | 0.6500 | 0.3500 | 2113 | 2207 | 613 | 0.95  | 0.6407 | 0.6593 | 0.3407 | 0.3593 | 2052 | 2302 | 646 | 2174 | 2246 | 580 | 7.43   | 4.21   |
| 5000 | 0.98 | 0.6500 | 0.3500 | 2113 | 2230 | 613 | 0.42  | 0.6407 | 0.6593 | 0.3407 | 0.3593 | 2052 | 2302 | 646 | 2174 | 2246 | 580 | 5.77   | 3.64   |
| 5000 | 0.99 | 0.6500 | 0.3500 | 2113 | 2252 | 613 | 0.10  | 0.6407 | 0.6593 | 0.3407 | 0.3593 | 2052 | 2302 | 646 | 2174 | 2246 | 580 | 4.56   | 3.54   |
| 5000 | 1.00 | 0.6500 | 0.3500 | 2113 | 2275 | 613 | 0.00  | 0.6407 | 0.6593 | 0.3407 | 0.3593 | 2052 | 2302 | 646 | 2174 | 2246 | 580 | 3.80   | 3.89   |
| 5000 | 1.01 | 0.6500 | 0.3500 | 2113 | 2298 | 613 | 0.10  | 0.6407 | 0.6593 | 0.3407 | 0.3593 | 2052 | 2302 | 646 | 2174 | 2246 | 580 | 3.48   | 4.71   |
| 5000 | 1.02 | 0.6500 | 0.3500 | 2113 | 2321 | 613 | 0.41  | 0.6407 | 0.6593 | 0.3407 | 0.3593 | 2052 | 2302 | 646 | 2174 | 2246 | 580 | 3.62   | 5.99   |
| 5000 | 1.03 | 0.6500 | 0.3500 | 2113 | 2343 | 613 | 0.92  | 0.6407 | 0.6593 | 0.3407 | 0.3593 | 2052 | 2302 | 646 | 2174 | 2246 | 580 | 4.21   | 7.72   |
| 5000 | 1.04 | 0.6500 | 0.3500 | 2113 | 2366 | 613 | 1.62  | 0.6407 | 0.6593 | 0.3407 | 0.3593 | 2052 | 2302 | 646 | 2174 | 2246 | 580 | 5.25   | 9.92   |

|      |      |        |        |      |      |     |       |        |        |        |        |      |      |     |      |      |     |        |        |
|------|------|--------|--------|------|------|-----|-------|--------|--------|--------|--------|------|------|-----|------|------|-----|--------|--------|
| 5000 | 1.05 | 0.6500 | 0.3500 | 2113 | 2389 | 613 | 2.52  | 0.6407 | 0.6593 | 0.3407 | 0.3593 | 2052 | 2302 | 646 | 2174 | 2246 | 580 | 6.73   | 12.58  |
| 5000 | 1.06 | 0.6500 | 0.3500 | 2113 | 2412 | 613 | 3.61  | 0.6407 | 0.6593 | 0.3407 | 0.3593 | 2052 | 2302 | 646 | 2174 | 2246 | 580 | 8.67   | 15.70  |
| 5000 | 1.07 | 0.6500 | 0.3500 | 2113 | 2434 | 613 | 4.89  | 0.6407 | 0.6593 | 0.3407 | 0.3593 | 2052 | 2302 | 646 | 2174 | 2246 | 580 | 11.05  | 19.28  |
| 5000 | 1.08 | 0.6500 | 0.3500 | 2113 | 2457 | 613 | 6.35  | 0.6407 | 0.6593 | 0.3407 | 0.3593 | 2052 | 2302 | 646 | 2174 | 2246 | 580 | 13.89  | 23.33  |
| 5000 | 1.09 | 0.6500 | 0.3500 | 2113 | 2480 | 613 | 8.00  | 0.6407 | 0.6593 | 0.3407 | 0.3593 | 2052 | 2302 | 646 | 2174 | 2246 | 580 | 17.17  | 27.83  |
| 5000 | 1.10 | 0.6500 | 0.3500 | 2113 | 2503 | 613 | 9.82  | 0.6407 | 0.6593 | 0.3407 | 0.3593 | 2052 | 2302 | 646 | 2174 | 2246 | 580 | 20.91  | 32.79  |
| 5000 | 1.11 | 0.6500 | 0.3500 | 2113 | 2525 | 613 | 11.82 | 0.6407 | 0.6593 | 0.3407 | 0.3593 | 2052 | 2302 | 646 | 2174 | 2246 | 580 | 25.09  | 38.22  |
| 5000 | 1.12 | 0.6500 | 0.3500 | 2113 | 2548 | 613 | 14.00 | 0.6407 | 0.6593 | 0.3407 | 0.3593 | 2052 | 2302 | 646 | 2174 | 2246 | 580 | 29.73  | 44.10  |
| 5000 | 1.13 | 0.6500 | 0.3500 | 2113 | 2571 | 613 | 16.35 | 0.6407 | 0.6593 | 0.3407 | 0.3593 | 2052 | 2302 | 646 | 2174 | 2246 | 580 | 34.81  | 50.45  |
| 5000 | 1.14 | 0.6500 | 0.3500 | 2113 | 2594 | 613 | 18.86 | 0.6407 | 0.6593 | 0.3407 | 0.3593 | 2052 | 2302 | 646 | 2174 | 2246 | 580 | 40.34  | 57.26  |
| 5000 | 1.15 | 0.6500 | 0.3500 | 2113 | 2616 | 613 | 21.55 | 0.6407 | 0.6593 | 0.3407 | 0.3593 | 2052 | 2302 | 646 | 2174 | 2246 | 580 | 46.32  | 64.53  |
| 5000 | 1.16 | 0.6500 | 0.3500 | 2113 | 2639 | 613 | 24.40 | 0.6407 | 0.6593 | 0.3407 | 0.3593 | 2052 | 2302 | 646 | 2174 | 2246 | 580 | 52.76  | 72.26  |
| 5000 | 1.17 | 0.6500 | 0.3500 | 2113 | 2662 | 613 | 27.41 | 0.6407 | 0.6593 | 0.3407 | 0.3593 | 2052 | 2302 | 646 | 2174 | 2246 | 580 | 59.64  | 80.45  |
| 5000 | 1.18 | 0.6500 | 0.3500 | 2113 | 2685 | 613 | 30.58 | 0.6407 | 0.6593 | 0.3407 | 0.3593 | 2052 | 2302 | 646 | 2174 | 2246 | 580 | 66.97  | 89.10  |
| 5000 | 1.19 | 0.6500 | 0.3500 | 2113 | 2707 | 613 | 33.91 | 0.6407 | 0.6593 | 0.3407 | 0.3593 | 2052 | 2302 | 646 | 2174 | 2246 | 580 | 74.75  | 98.21  |
| 5000 | 1.20 | 0.6500 | 0.3500 | 2113 | 2730 | 613 | 37.39 | 0.6407 | 0.6593 | 0.3407 | 0.3593 | 2052 | 2302 | 646 | 2174 | 2246 | 580 | 82.98  | 107.78 |
| 5000 | 0.80 | 0.7000 | 0.3000 | 2450 | 1680 | 450 | 40.05 | 0.6910 | 0.7090 | 0.2910 | 0.3090 | 2388 | 2135 | 477 | 2513 | 2063 | 423 | 100.21 | 74.45  |
| 5000 | 0.81 | 0.7000 | 0.3000 | 2450 | 1701 | 450 | 35.90 | 0.6910 | 0.7090 | 0.2910 | 0.3090 | 2388 | 2135 | 477 | 2513 | 2063 | 423 | 91.47  | 66.86  |
| 5000 | 0.82 | 0.7000 | 0.3000 | 2450 | 1722 | 450 | 32.00 | 0.6910 | 0.7090 | 0.2910 | 0.3090 | 2388 | 2135 | 477 | 2513 | 2063 | 423 | 83.14  | 59.70  |
| 5000 | 0.83 | 0.7000 | 0.3000 | 2450 | 1743 | 450 | 28.35 | 0.6910 | 0.7090 | 0.2910 | 0.3090 | 2388 | 2135 | 477 | 2513 | 2063 | 423 | 75.22  | 52.97  |
| 5000 | 0.84 | 0.7000 | 0.3000 | 2450 | 1764 | 450 | 24.94 | 0.6910 | 0.7090 | 0.2910 | 0.3090 | 2388 | 2135 | 477 | 2513 | 2063 | 423 | 67.71  | 46.66  |
| 5000 | 0.85 | 0.7000 | 0.3000 | 2450 | 1785 | 450 | 21.78 | 0.6910 | 0.7090 | 0.2910 | 0.3090 | 2388 | 2135 | 477 | 2513 | 2063 | 423 | 60.61  | 40.79  |
| 5000 | 0.86 | 0.7000 | 0.3000 | 2450 | 1806 | 450 | 18.85 | 0.6910 | 0.7090 | 0.2910 | 0.3090 | 2388 | 2135 | 477 | 2513 | 2063 | 423 | 53.93  | 35.33  |
| 5000 | 0.87 | 0.7000 | 0.3000 | 2450 | 1827 | 450 | 16.14 | 0.6910 | 0.7090 | 0.2910 | 0.3090 | 2388 | 2135 | 477 | 2513 | 2063 | 423 | 47.67  | 30.31  |
| 5000 | 0.88 | 0.7000 | 0.3000 | 2450 | 1848 | 450 | 13.67 | 0.6910 | 0.7090 | 0.2910 | 0.3090 | 2388 | 2135 | 477 | 2513 | 2063 | 423 | 41.81  | 25.72  |
| 5000 | 0.89 | 0.7000 | 0.3000 | 2450 | 1869 | 450 | 11.41 | 0.6910 | 0.7090 | 0.2910 | 0.3090 | 2388 | 2135 | 477 | 2513 | 2063 | 423 | 36.37  | 21.55  |
| 5000 | 0.90 | 0.7000 | 0.3000 | 2450 | 1890 | 450 | 9.37  | 0.6910 | 0.7090 | 0.2910 | 0.3090 | 2388 | 2135 | 477 | 2513 | 2063 | 423 | 31.34  | 17.81  |
| 5000 | 0.91 | 0.7000 | 0.3000 | 2450 | 1911 | 450 | 7.54  | 0.6910 | 0.7090 | 0.2910 | 0.3090 | 2388 | 2135 | 477 | 2513 | 2063 | 423 | 26.73  | 14.49  |
| 5000 | 0.92 | 0.7000 | 0.3000 | 2450 | 1932 | 450 | 5.92  | 0.6910 | 0.7090 | 0.2910 | 0.3090 | 2388 | 2135 | 477 | 2513 | 2063 | 423 | 22.52  | 11.61  |
| 5000 | 0.93 | 0.7000 | 0.3000 | 2450 | 1953 | 450 | 4.51  | 0.6910 | 0.7090 | 0.2910 | 0.3090 | 2388 | 2135 | 477 | 2513 | 2063 | 423 | 18.74  | 9.15   |
| 5000 | 0.94 | 0.7000 | 0.3000 | 2450 | 1974 | 450 | 3.29  | 0.6910 | 0.7090 | 0.2910 | 0.3090 | 2388 | 2135 | 477 | 2513 | 2063 | 423 | 15.36  | 7.12   |
| 5000 | 0.95 | 0.7000 | 0.3000 | 2450 | 1995 | 450 | 2.27  | 0.6910 | 0.7090 | 0.2910 | 0.3090 | 2388 | 2135 | 477 | 2513 | 2063 | 423 | 12.40  | 5.52   |
| 5000 | 0.96 | 0.7000 | 0.3000 | 2450 | 2016 | 450 | 1.44  | 0.6910 | 0.7090 | 0.2910 | 0.3090 | 2388 | 2135 | 477 | 2513 | 2063 | 423 | 9.85   | 4.34   |
| 5000 | 0.97 | 0.7000 | 0.3000 | 2450 | 2037 | 450 | 0.81  | 0.6910 | 0.7090 | 0.2910 | 0.3090 | 2388 | 2135 | 477 | 2513 | 2063 | 423 | 7.71   | 3.59   |
| 5000 | 0.98 | 0.7000 | 0.3000 | 2450 | 2058 | 450 | 0.36  | 0.6910 | 0.7090 | 0.2910 | 0.3090 | 2388 | 2135 | 477 | 2513 | 2063 | 423 | 5.99   | 3.27   |



|      |      |        |        |      |      |     |       |        |        |        |        |      |      |     |      |      |     |       |        |
|------|------|--------|--------|------|------|-----|-------|--------|--------|--------|--------|------|------|-----|------|------|-----|-------|--------|
| 5000 | 0.99 | 0.7000 | 0.3000 | 2450 | 2079 | 450 | 0.09  | 0.6910 | 0.7090 | 0.2910 | 0.3090 | 2388 | 2135 | 477 | 2513 | 2063 | 423 | 4.68  | 3.38   |
| 5000 | 1.00 | 0.7000 | 0.3000 | 2450 | 2100 | 450 | 0.00  | 0.6910 | 0.7090 | 0.2910 | 0.3090 | 2388 | 2135 | 477 | 2513 | 2063 | 423 | 3.78  | 3.91   |
| 5000 | 1.01 | 0.7000 | 0.3000 | 2450 | 2121 | 450 | 0.09  | 0.6910 | 0.7090 | 0.2910 | 0.3090 | 2388 | 2135 | 477 | 2513 | 2063 | 423 | 3.29  | 4.87   |
| 5000 | 1.02 | 0.7000 | 0.3000 | 2450 | 2142 | 450 | 0.35  | 0.6910 | 0.7090 | 0.2910 | 0.3090 | 2388 | 2135 | 477 | 2513 | 2063 | 423 | 3.22  | 6.26   |
| 5000 | 1.03 | 0.7000 | 0.3000 | 2450 | 2163 | 450 | 0.78  | 0.6910 | 0.7090 | 0.2910 | 0.3090 | 2388 | 2135 | 477 | 2513 | 2063 | 423 | 3.57  | 8.08   |
| 5000 | 1.04 | 0.7000 | 0.3000 | 2450 | 2184 | 450 | 1.38  | 0.6910 | 0.7090 | 0.2910 | 0.3090 | 2388 | 2135 | 477 | 2513 | 2063 | 423 | 4.32  | 10.32  |
| 5000 | 1.05 | 0.7000 | 0.3000 | 2450 | 2205 | 450 | 2.14  | 0.6910 | 0.7090 | 0.2910 | 0.3090 | 2388 | 2135 | 477 | 2513 | 2063 | 423 | 5.49  | 12.99  |
| 5000 | 1.06 | 0.7000 | 0.3000 | 2450 | 2226 | 450 | 3.07  | 0.6910 | 0.7090 | 0.2910 | 0.3090 | 2388 | 2135 | 477 | 2513 | 2063 | 423 | 7.07  | 16.09  |
| 5000 | 1.07 | 0.7000 | 0.3000 | 2450 | 2247 | 450 | 4.15  | 0.6910 | 0.7090 | 0.2910 | 0.3090 | 2388 | 2135 | 477 | 2513 | 2063 | 423 | 9.06  | 19.62  |
| 5000 | 1.08 | 0.7000 | 0.3000 | 2450 | 2268 | 450 | 5.40  | 0.6910 | 0.7090 | 0.2910 | 0.3090 | 2388 | 2135 | 477 | 2513 | 2063 | 423 | 11.47 | 23.57  |
| 5000 | 1.09 | 0.7000 | 0.3000 | 2450 | 2289 | 450 | 6.79  | 0.6910 | 0.7090 | 0.2910 | 0.3090 | 2388 | 2135 | 477 | 2513 | 2063 | 423 | 14.29 | 27.95  |
| 5000 | 1.10 | 0.7000 | 0.3000 | 2450 | 2310 | 450 | 8.34  | 0.6910 | 0.7090 | 0.2910 | 0.3090 | 2388 | 2135 | 477 | 2513 | 2063 | 423 | 17.53 | 32.76  |
| 5000 | 1.11 | 0.7000 | 0.3000 | 2450 | 2331 | 450 | 10.04 | 0.6910 | 0.7090 | 0.2910 | 0.3090 | 2388 | 2135 | 477 | 2513 | 2063 | 423 | 21.17 | 38.00  |
| 5000 | 1.12 | 0.7000 | 0.3000 | 2450 | 2352 | 450 | 11.89 | 0.6910 | 0.7090 | 0.2910 | 0.3090 | 2388 | 2135 | 477 | 2513 | 2063 | 423 | 25.23 | 43.66  |
| 5000 | 1.13 | 0.7000 | 0.3000 | 2450 | 2373 | 450 | 13.88 | 0.6910 | 0.7090 | 0.2910 | 0.3090 | 2388 | 2135 | 477 | 2513 | 2063 | 423 | 29.70 | 49.75  |
| 5000 | 1.14 | 0.7000 | 0.3000 | 2450 | 2394 | 450 | 16.01 | 0.6910 | 0.7090 | 0.2910 | 0.3090 | 2388 | 2135 | 477 | 2513 | 2063 | 423 | 34.59 | 56.27  |
| 5000 | 1.15 | 0.7000 | 0.3000 | 2450 | 2415 | 450 | 18.28 | 0.6910 | 0.7090 | 0.2910 | 0.3090 | 2388 | 2135 | 477 | 2513 | 2063 | 423 | 39.89 | 63.22  |
| 5000 | 1.16 | 0.7000 | 0.3000 | 2450 | 2436 | 450 | 20.70 | 0.6910 | 0.7090 | 0.2910 | 0.3090 | 2388 | 2135 | 477 | 2513 | 2063 | 423 | 45.60 | 70.59  |
| 5000 | 1.17 | 0.7000 | 0.3000 | 2450 | 2457 | 450 | 23.24 | 0.6910 | 0.7090 | 0.2910 | 0.3090 | 2388 | 2135 | 477 | 2513 | 2063 | 423 | 51.73 | 78.39  |
| 5000 | 1.18 | 0.7000 | 0.3000 | 2450 | 2478 | 450 | 25.93 | 0.6910 | 0.7090 | 0.2910 | 0.3090 | 2388 | 2135 | 477 | 2513 | 2063 | 423 | 58.26 | 86.62  |
| 5000 | 1.19 | 0.7000 | 0.3000 | 2450 | 2499 | 450 | 28.74 | 0.6910 | 0.7090 | 0.2910 | 0.3090 | 2388 | 2135 | 477 | 2513 | 2063 | 423 | 65.22 | 95.28  |
| 5000 | 1.20 | 0.7000 | 0.3000 | 2450 | 2520 | 450 | 31.69 | 0.6910 | 0.7090 | 0.2910 | 0.3090 | 2388 | 2135 | 477 | 2513 | 2063 | 423 | 72.58 | 104.36 |
| 5000 | 0.80 | 0.7500 | 0.2500 | 2813 | 1500 | 313 | 32.32 | 0.7415 | 0.7585 | 0.2415 | 0.2585 | 2749 | 1917 | 334 | 2877 | 1832 | 292 | 93.45 | 63.03  |
| 5000 | 0.81 | 0.7500 | 0.2500 | 2813 | 1519 | 313 | 28.94 | 0.7415 | 0.7585 | 0.2415 | 0.2585 | 2749 | 1917 | 334 | 2877 | 1832 | 292 | 85.48 | 56.43  |
| 5000 | 0.82 | 0.7500 | 0.2500 | 2813 | 1538 | 313 | 25.78 | 0.7415 | 0.7585 | 0.2415 | 0.2585 | 2749 | 1917 | 334 | 2877 | 1832 | 292 | 77.88 | 50.21  |
| 5000 | 0.83 | 0.7500 | 0.2500 | 2813 | 1556 | 313 | 22.82 | 0.7415 | 0.7585 | 0.2415 | 0.2585 | 2749 | 1917 | 334 | 2877 | 1832 | 292 | 70.64 | 44.38  |
| 5000 | 0.84 | 0.7500 | 0.2500 | 2813 | 1575 | 313 | 20.07 | 0.7415 | 0.7585 | 0.2415 | 0.2585 | 2749 | 1917 | 334 | 2877 | 1832 | 292 | 63.77 | 38.93  |
| 5000 | 0.85 | 0.7500 | 0.2500 | 2813 | 1594 | 313 | 17.51 | 0.7415 | 0.7585 | 0.2415 | 0.2585 | 2749 | 1917 | 334 | 2877 | 1832 | 292 | 57.27 | 33.86  |
| 5000 | 0.86 | 0.7500 | 0.2500 | 2813 | 1613 | 313 | 15.14 | 0.7415 | 0.7585 | 0.2415 | 0.2585 | 2749 | 1917 | 334 | 2877 | 1832 | 292 | 51.13 | 29.18  |
| 5000 | 0.87 | 0.7500 | 0.2500 | 2813 | 1631 | 313 | 12.96 | 0.7415 | 0.7585 | 0.2415 | 0.2585 | 2749 | 1917 | 334 | 2877 | 1832 | 292 | 45.37 | 24.88  |
| 5000 | 0.88 | 0.7500 | 0.2500 | 2813 | 1650 | 313 | 10.97 | 0.7415 | 0.7585 | 0.2415 | 0.2585 | 2749 | 1917 | 334 | 2877 | 1832 | 292 | 39.96 | 20.97  |
| 5000 | 0.89 | 0.7500 | 0.2500 | 2813 | 1669 | 313 | 9.15  | 0.7415 | 0.7585 | 0.2415 | 0.2585 | 2749 | 1917 | 334 | 2877 | 1832 | 292 | 34.93 | 17.44  |
| 5000 | 0.90 | 0.7500 | 0.2500 | 2813 | 1688 | 313 | 7.51  | 0.7415 | 0.7585 | 0.2415 | 0.2585 | 2749 | 1917 | 334 | 2877 | 1832 | 292 | 30.26 | 14.29  |
| 5000 | 0.91 | 0.7500 | 0.2500 | 2813 | 1706 | 313 | 6.04  | 0.7415 | 0.7585 | 0.2415 | 0.2585 | 2749 | 1917 | 334 | 2877 | 1832 | 292 | 25.96 | 11.53  |
| 5000 | 0.92 | 0.7500 | 0.2500 | 2813 | 1725 | 313 | 4.74  | 0.7415 | 0.7585 | 0.2415 | 0.2585 | 2749 | 1917 | 334 | 2877 | 1832 | 292 | 22.03 | 9.15   |

|      |      |        |        |      |      |     |       |        |        |        |        |      |      |     |      |      |     |       |       |
|------|------|--------|--------|------|------|-----|-------|--------|--------|--------|--------|------|------|-----|------|------|-----|-------|-------|
| 5000 | 0.93 | 0.7500 | 0.2500 | 2813 | 1744 | 313 | 3.61  | 0.7415 | 0.7585 | 0.2415 | 0.2585 | 2749 | 1917 | 334 | 2877 | 1832 | 292 | 18.46 | 7.15  |
| 5000 | 0.94 | 0.7500 | 0.2500 | 2813 | 1763 | 313 | 2.63  | 0.7415 | 0.7585 | 0.2415 | 0.2585 | 2749 | 1917 | 334 | 2877 | 1832 | 292 | 15.26 | 5.54  |
| 5000 | 0.95 | 0.7500 | 0.2500 | 2813 | 1781 | 313 | 1.82  | 0.7415 | 0.7585 | 0.2415 | 0.2585 | 2749 | 1917 | 334 | 2877 | 1832 | 292 | 12.42 | 4.31  |
| 5000 | 0.96 | 0.7500 | 0.2500 | 2813 | 1800 | 313 | 1.15  | 0.7415 | 0.7585 | 0.2415 | 0.2585 | 2749 | 1917 | 334 | 2877 | 1832 | 292 | 9.96  | 3.47  |
| 5000 | 0.97 | 0.7500 | 0.2500 | 2813 | 1819 | 313 | 0.64  | 0.7415 | 0.7585 | 0.2415 | 0.2585 | 2749 | 1917 | 334 | 2877 | 1832 | 292 | 7.86  | 3.01  |
| 5000 | 0.98 | 0.7500 | 0.2500 | 2813 | 1838 | 313 | 0.28  | 0.7415 | 0.7585 | 0.2415 | 0.2585 | 2749 | 1917 | 334 | 2877 | 1832 | 292 | 6.12  | 2.93  |
| 5000 | 0.99 | 0.7500 | 0.2500 | 2813 | 1856 | 313 | 0.07  | 0.7415 | 0.7585 | 0.2415 | 0.2585 | 2749 | 1917 | 334 | 2877 | 1832 | 292 | 4.76  | 3.24  |
| 5000 | 1.00 | 0.7500 | 0.2500 | 2813 | 1875 | 313 | 0.00  | 0.7415 | 0.7585 | 0.2415 | 0.2585 | 2749 | 1917 | 334 | 2877 | 1832 | 292 | 3.76  | 3.93  |
| 5000 | 1.01 | 0.7500 | 0.2500 | 2813 | 1894 | 313 | 0.07  | 0.7415 | 0.7585 | 0.2415 | 0.2585 | 2749 | 1917 | 334 | 2877 | 1832 | 292 | 3.13  | 5.01  |
| 5000 | 1.02 | 0.7500 | 0.2500 | 2813 | 1913 | 313 | 0.28  | 0.7415 | 0.7585 | 0.2415 | 0.2585 | 2749 | 1917 | 334 | 2877 | 1832 | 292 | 2.86  | 6.47  |
| 5000 | 1.03 | 0.7500 | 0.2500 | 2813 | 1931 | 313 | 0.62  | 0.7415 | 0.7585 | 0.2415 | 0.2585 | 2749 | 1917 | 334 | 2877 | 1832 | 292 | 2.96  | 8.31  |
| 5000 | 1.04 | 0.7500 | 0.2500 | 2813 | 1950 | 313 | 1.10  | 0.7415 | 0.7585 | 0.2415 | 0.2585 | 2749 | 1917 | 334 | 2877 | 1832 | 292 | 3.43  | 10.54 |
| 5000 | 1.05 | 0.7500 | 0.2500 | 2813 | 1969 | 313 | 1.70  | 0.7415 | 0.7585 | 0.2415 | 0.2585 | 2749 | 1917 | 334 | 2877 | 1832 | 292 | 4.26  | 13.15 |
| 5000 | 1.06 | 0.7500 | 0.2500 | 2813 | 1988 | 313 | 2.44  | 0.7415 | 0.7585 | 0.2415 | 0.2585 | 2749 | 1917 | 334 | 2877 | 1832 | 292 | 5.46  | 16.14 |
| 5000 | 1.07 | 0.7500 | 0.2500 | 2813 | 2006 | 313 | 3.30  | 0.7415 | 0.7585 | 0.2415 | 0.2585 | 2749 | 1917 | 334 | 2877 | 1832 | 292 | 7.03  | 19.52 |
| 5000 | 1.08 | 0.7500 | 0.2500 | 2813 | 2025 | 313 | 4.29  | 0.7415 | 0.7585 | 0.2415 | 0.2585 | 2749 | 1917 | 334 | 2877 | 1832 | 292 | 8.97  | 23.28 |
| 5000 | 1.09 | 0.7500 | 0.2500 | 2813 | 2044 | 313 | 5.40  | 0.7415 | 0.7585 | 0.2415 | 0.2585 | 2749 | 1917 | 334 | 2877 | 1832 | 292 | 11.27 | 27.43 |
| 5000 | 1.10 | 0.7500 | 0.2500 | 2813 | 2063 | 313 | 6.62  | 0.7415 | 0.7585 | 0.2415 | 0.2585 | 2749 | 1917 | 334 | 2877 | 1832 | 292 | 13.94 | 31.96 |
| 5000 | 1.11 | 0.7500 | 0.2500 | 2813 | 2081 | 313 | 7.97  | 0.7415 | 0.7585 | 0.2415 | 0.2585 | 2749 | 1917 | 334 | 2877 | 1832 | 292 | 16.97 | 36.87 |
| 5000 | 1.12 | 0.7500 | 0.2500 | 2813 | 2100 | 313 | 9.43  | 0.7415 | 0.7585 | 0.2415 | 0.2585 | 2749 | 1917 | 334 | 2877 | 1832 | 292 | 20.38 | 42.17 |
| 5000 | 1.13 | 0.7500 | 0.2500 | 2813 | 2119 | 313 | 11.01 | 0.7415 | 0.7585 | 0.2415 | 0.2585 | 2749 | 1917 | 334 | 2877 | 1832 | 292 | 24.15 | 47.85 |
| 5000 | 1.14 | 0.7500 | 0.2500 | 2813 | 2138 | 313 | 12.70 | 0.7415 | 0.7585 | 0.2415 | 0.2585 | 2749 | 1917 | 334 | 2877 | 1832 | 292 | 28.28 | 53.92 |
| 5000 | 1.15 | 0.7500 | 0.2500 | 2813 | 2156 | 313 | 14.50 | 0.7415 | 0.7585 | 0.2415 | 0.2585 | 2749 | 1917 | 334 | 2877 | 1832 | 292 | 32.79 | 60.37 |
| 5000 | 1.16 | 0.7500 | 0.2500 | 2813 | 2175 | 313 | 16.40 | 0.7415 | 0.7585 | 0.2415 | 0.2585 | 2749 | 1917 | 334 | 2877 | 1832 | 292 | 37.66 | 67.20 |
| 5000 | 1.17 | 0.7500 | 0.2500 | 2813 | 2194 | 313 | 18.42 | 0.7415 | 0.7585 | 0.2415 | 0.2585 | 2749 | 1917 | 334 | 2877 | 1832 | 292 | 42.89 | 74.42 |
| 5000 | 1.18 | 0.7500 | 0.2500 | 2813 | 2213 | 313 | 20.54 | 0.7415 | 0.7585 | 0.2415 | 0.2585 | 2749 | 1917 | 334 | 2877 | 1832 | 292 | 48.50 | 82.02 |
| 5000 | 1.19 | 0.7500 | 0.2500 | 2813 | 2231 | 313 | 22.76 | 0.7415 | 0.7585 | 0.2415 | 0.2585 | 2749 | 1917 | 334 | 2877 | 1832 | 292 | 54.47 | 90.00 |
| 5000 | 1.20 | 0.7500 | 0.2500 | 2813 | 2250 | 313 | 25.09 | 0.7415 | 0.7585 | 0.2415 | 0.2585 | 2749 | 1917 | 334 | 2877 | 1832 | 292 | 60.80 | 98.37 |
| 5000 | 0.80 | 0.8000 | 0.2000 | 3200 | 1280 | 200 | 23.88 | 0.7922 | 0.8078 | 0.1922 | 0.2078 | 3138 | 1646 | 216 | 3263 | 1552 | 185 | 83.98 | 50.28 |
| 5000 | 0.81 | 0.8000 | 0.2000 | 3200 | 1296 | 200 | 21.36 | 0.7922 | 0.8078 | 0.1922 | 0.2078 | 3138 | 1646 | 216 | 3263 | 1552 | 185 | 77.01 | 44.83 |
| 5000 | 0.82 | 0.8000 | 0.2000 | 3200 | 1312 | 200 | 19.01 | 0.7922 | 0.8078 | 0.1922 | 0.2078 | 3138 | 1646 | 216 | 3263 | 1552 | 185 | 70.35 | 39.71 |
| 5000 | 0.83 | 0.8000 | 0.2000 | 3200 | 1328 | 200 | 16.82 | 0.7922 | 0.8078 | 0.1922 | 0.2078 | 3138 | 1646 | 216 | 3263 | 1552 | 185 | 64.01 | 34.92 |
| 5000 | 0.84 | 0.8000 | 0.2000 | 3200 | 1344 | 200 | 14.77 | 0.7922 | 0.8078 | 0.1922 | 0.2078 | 3138 | 1646 | 216 | 3263 | 1552 | 185 | 57.98 | 30.46 |
| 5000 | 0.85 | 0.8000 | 0.2000 | 3200 | 1360 | 200 | 12.88 | 0.7922 | 0.8078 | 0.1922 | 0.2078 | 3138 | 1646 | 216 | 3263 | 1552 | 185 | 52.25 | 26.33 |
| 5000 | 0.86 | 0.8000 | 0.2000 | 3200 | 1376 | 200 | 11.13 | 0.7922 | 0.8078 | 0.1922 | 0.2078 | 3138 | 1646 | 216 | 3263 | 1552 | 185 | 46.84 | 22.53 |

|      |      |        |        |      |      |     |       |        |        |        |        |      |      |     |      |      |     |       |       |
|------|------|--------|--------|------|------|-----|-------|--------|--------|--------|--------|------|------|-----|------|------|-----|-------|-------|
| 5000 | 0.87 | 0.8000 | 0.2000 | 3200 | 1392 | 200 | 9.52  | 0.7922 | 0.8078 | 0.1922 | 0.2078 | 3138 | 1646 | 216 | 3263 | 1552 | 185 | 41.74 | 19.06 |
| 5000 | 0.88 | 0.8000 | 0.2000 | 3200 | 1408 | 200 | 8.05  | 0.7922 | 0.8078 | 0.1922 | 0.2078 | 3138 | 1646 | 216 | 3263 | 1552 | 185 | 36.95 | 15.92 |
| 5000 | 0.89 | 0.8000 | 0.2000 | 3200 | 1424 | 200 | 6.71  | 0.7922 | 0.8078 | 0.1922 | 0.2078 | 3138 | 1646 | 216 | 3263 | 1552 | 185 | 32.47 | 13.11 |
| 5000 | 0.90 | 0.8000 | 0.2000 | 3200 | 1440 | 200 | 5.50  | 0.7922 | 0.8078 | 0.1922 | 0.2078 | 3138 | 1646 | 216 | 3263 | 1552 | 185 | 28.31 | 10.63 |
| 5000 | 0.91 | 0.8000 | 0.2000 | 3200 | 1456 | 200 | 4.42  | 0.7922 | 0.8078 | 0.1922 | 0.2078 | 3138 | 1646 | 216 | 3263 | 1552 | 185 | 24.45 | 8.48  |
| 5000 | 0.92 | 0.8000 | 0.2000 | 3200 | 1472 | 200 | 3.47  | 0.7922 | 0.8078 | 0.1922 | 0.2078 | 3138 | 1646 | 216 | 3263 | 1552 | 185 | 20.90 | 6.66  |
| 5000 | 0.93 | 0.8000 | 0.2000 | 3200 | 1488 | 200 | 2.64  | 0.7922 | 0.8078 | 0.1922 | 0.2078 | 3138 | 1646 | 216 | 3263 | 1552 | 185 | 17.67 | 5.16  |
| 5000 | 0.94 | 0.8000 | 0.2000 | 3200 | 1504 | 200 | 1.92  | 0.7922 | 0.8078 | 0.1922 | 0.2078 | 3138 | 1646 | 216 | 3263 | 1552 | 185 | 14.75 | 4.00  |
| 5000 | 0.95 | 0.8000 | 0.2000 | 3200 | 1520 | 200 | 1.33  | 0.7922 | 0.8078 | 0.1922 | 0.2078 | 3138 | 1646 | 216 | 3263 | 1552 | 185 | 12.13 | 3.17  |
| 5000 | 0.96 | 0.8000 | 0.2000 | 3200 | 1536 | 200 | 0.84  | 0.7922 | 0.8078 | 0.1922 | 0.2078 | 3138 | 1646 | 216 | 3263 | 1552 | 185 | 9.83  | 2.67  |
| 5000 | 0.97 | 0.8000 | 0.2000 | 3200 | 1552 | 200 | 0.47  | 0.7922 | 0.8078 | 0.1922 | 0.2078 | 3138 | 1646 | 216 | 3263 | 1552 | 185 | 7.84  | 2.50  |
| 5000 | 0.98 | 0.8000 | 0.2000 | 3200 | 1568 | 200 | 0.21  | 0.7922 | 0.8078 | 0.1922 | 0.2078 | 3138 | 1646 | 216 | 3263 | 1552 | 185 | 6.16  | 2.66  |
| 5000 | 0.99 | 0.8000 | 0.2000 | 3200 | 1584 | 200 | 0.05  | 0.7922 | 0.8078 | 0.1922 | 0.2078 | 3138 | 1646 | 216 | 3263 | 1552 | 185 | 4.79  | 3.14  |
| 5000 | 1.00 | 0.8000 | 0.2000 | 3200 | 1600 | 200 | 0.00  | 0.7922 | 0.8078 | 0.1922 | 0.2078 | 3138 | 1646 | 216 | 3263 | 1552 | 185 | 3.73  | 3.96  |
| 5000 | 1.01 | 0.8000 | 0.2000 | 3200 | 1616 | 200 | 0.05  | 0.7922 | 0.8078 | 0.1922 | 0.2078 | 3138 | 1646 | 216 | 3263 | 1552 | 185 | 2.99  | 5.11  |
| 5000 | 1.02 | 0.8000 | 0.2000 | 3200 | 1632 | 200 | 0.20  | 0.7922 | 0.8078 | 0.1922 | 0.2078 | 3138 | 1646 | 216 | 3263 | 1552 | 185 | 2.55  | 6.58  |
| 5000 | 1.03 | 0.8000 | 0.2000 | 3200 | 1648 | 200 | 0.45  | 0.7922 | 0.8078 | 0.1922 | 0.2078 | 3138 | 1646 | 216 | 3263 | 1552 | 185 | 2.43  | 8.39  |
| 5000 | 1.04 | 0.8000 | 0.2000 | 3200 | 1664 | 200 | 0.80  | 0.7922 | 0.8078 | 0.1922 | 0.2078 | 3138 | 1646 | 216 | 3263 | 1552 | 185 | 2.61  | 10.53 |
| 5000 | 1.05 | 0.8000 | 0.2000 | 3200 | 1680 | 200 | 1.24  | 0.7922 | 0.8078 | 0.1922 | 0.2078 | 3138 | 1646 | 216 | 3263 | 1552 | 185 | 3.11  | 12.99 |
| 5000 | 1.06 | 0.8000 | 0.2000 | 3200 | 1696 | 200 | 1.77  | 0.7922 | 0.8078 | 0.1922 | 0.2078 | 3138 | 1646 | 216 | 3263 | 1552 | 185 | 3.92  | 15.79 |
| 5000 | 1.07 | 0.8000 | 0.2000 | 3200 | 1712 | 200 | 2.40  | 0.7922 | 0.8078 | 0.1922 | 0.2078 | 3138 | 1646 | 216 | 3263 | 1552 | 185 | 5.04  | 18.92 |
| 5000 | 1.08 | 0.8000 | 0.2000 | 3200 | 1728 | 200 | 3.11  | 0.7922 | 0.8078 | 0.1922 | 0.2078 | 3138 | 1646 | 216 | 3263 | 1552 | 185 | 6.47  | 22.37 |
| 5000 | 1.09 | 0.8000 | 0.2000 | 3200 | 1744 | 200 | 3.91  | 0.7922 | 0.8078 | 0.1922 | 0.2078 | 3138 | 1646 | 216 | 3263 | 1552 | 185 | 8.21  | 26.16 |
| 5000 | 1.10 | 0.8000 | 0.2000 | 3200 | 1760 | 200 | 4.80  | 0.7922 | 0.8078 | 0.1922 | 0.2078 | 3138 | 1646 | 216 | 3263 | 1552 | 185 | 10.26 | 30.28 |
| 5000 | 1.11 | 0.8000 | 0.2000 | 3200 | 1776 | 200 | 5.77  | 0.7922 | 0.8078 | 0.1922 | 0.2078 | 3138 | 1646 | 216 | 3263 | 1552 | 185 | 12.62 | 34.72 |
| 5000 | 1.12 | 0.8000 | 0.2000 | 3200 | 1792 | 200 | 6.83  | 0.7922 | 0.8078 | 0.1922 | 0.2078 | 3138 | 1646 | 216 | 3263 | 1552 | 185 | 15.30 | 39.50 |
| 5000 | 1.13 | 0.8000 | 0.2000 | 3200 | 1808 | 200 | 7.97  | 0.7922 | 0.8078 | 0.1922 | 0.2078 | 3138 | 1646 | 216 | 3263 | 1552 | 185 | 18.28 | 44.60 |
| 5000 | 1.14 | 0.8000 | 0.2000 | 3200 | 1824 | 200 | 9.19  | 0.7922 | 0.8078 | 0.1922 | 0.2078 | 3138 | 1646 | 216 | 3263 | 1552 | 185 | 21.58 | 50.04 |
| 5000 | 1.15 | 0.8000 | 0.2000 | 3200 | 1840 | 200 | 10.48 | 0.7922 | 0.8078 | 0.1922 | 0.2078 | 3138 | 1646 | 216 | 3263 | 1552 | 185 | 25.18 | 55.80 |
| 5000 | 1.16 | 0.8000 | 0.2000 | 3200 | 1856 | 200 | 11.86 | 0.7922 | 0.8078 | 0.1922 | 0.2078 | 3138 | 1646 | 216 | 3263 | 1552 | 185 | 29.10 | 61.90 |
| 5000 | 1.17 | 0.8000 | 0.2000 | 3200 | 1872 | 200 | 13.31 | 0.7922 | 0.8078 | 0.1922 | 0.2078 | 3138 | 1646 | 216 | 3263 | 1552 | 185 | 33.33 | 68.32 |
| 5000 | 1.18 | 0.8000 | 0.2000 | 3200 | 1888 | 200 | 14.84 | 0.7922 | 0.8078 | 0.1922 | 0.2078 | 3138 | 1646 | 216 | 3263 | 1552 | 185 | 37.87 | 75.07 |
| 5000 | 1.19 | 0.8000 | 0.2000 | 3200 | 1904 | 200 | 16.44 | 0.7922 | 0.8078 | 0.1922 | 0.2078 | 3138 | 1646 | 216 | 3263 | 1552 | 185 | 42.72 | 82.16 |
| 5000 | 1.20 | 0.8000 | 0.2000 | 3200 | 1920 | 200 | 18.12 | 0.7922 | 0.8078 | 0.1922 | 0.2078 | 3138 | 1646 | 216 | 3263 | 1552 | 185 | 47.88 | 89.57 |
| 5000 | 0.80 | 0.8500 | 0.1500 | 3613 | 1020 | 113 | 15.42 | 0.8430 | 0.8570 | 0.1430 | 0.1570 | 3553 | 1324 | 123 | 3672 | 1226 | 102 | 71.52 | 36.47 |

|      |      |        |        |      |      |     |       |        |        |        |        |      |      |     |      |      |     |       |       |
|------|------|--------|--------|------|------|-----|-------|--------|--------|--------|--------|------|------|-----|------|------|-----|-------|-------|
| 5000 | 0.81 | 0.8500 | 0.1500 | 3613 | 1033 | 113 | 13.78 | 0.8430 | 0.8570 | 0.1430 | 0.1570 | 3553 | 1324 | 123 | 3672 | 1226 | 102 | 65.80 | 32.32 |
| 5000 | 0.82 | 0.8500 | 0.1500 | 3613 | 1046 | 113 | 12.25 | 0.8430 | 0.8570 | 0.1430 | 0.1570 | 3553 | 1324 | 123 | 3672 | 1226 | 102 | 60.32 | 28.44 |
| 5000 | 0.83 | 0.8500 | 0.1500 | 3613 | 1058 | 113 | 10.83 | 0.8430 | 0.8570 | 0.1430 | 0.1570 | 3553 | 1324 | 123 | 3672 | 1226 | 102 | 55.08 | 24.83 |
| 5000 | 0.84 | 0.8500 | 0.1500 | 3613 | 1071 | 113 | 9.50  | 0.8430 | 0.8570 | 0.1430 | 0.1570 | 3553 | 1324 | 123 | 3672 | 1226 | 102 | 50.10 | 21.48 |
| 5000 | 0.85 | 0.8500 | 0.1500 | 3613 | 1084 | 113 | 8.28  | 0.8430 | 0.8570 | 0.1430 | 0.1570 | 3553 | 1324 | 123 | 3672 | 1226 | 102 | 45.35 | 18.40 |
| 5000 | 0.86 | 0.8500 | 0.1500 | 3613 | 1097 | 113 | 7.14  | 0.8430 | 0.8570 | 0.1430 | 0.1570 | 3553 | 1324 | 123 | 3672 | 1226 | 102 | 40.86 | 15.58 |
| 5000 | 0.87 | 0.8500 | 0.1500 | 3613 | 1109 | 113 | 6.11  | 0.8430 | 0.8570 | 0.1430 | 0.1570 | 3553 | 1324 | 123 | 3672 | 1226 | 102 | 36.61 | 13.03 |
| 5000 | 0.88 | 0.8500 | 0.1500 | 3613 | 1122 | 113 | 5.16  | 0.8430 | 0.8570 | 0.1430 | 0.1570 | 3553 | 1324 | 123 | 3672 | 1226 | 102 | 32.60 | 10.74 |
| 5000 | 0.89 | 0.8500 | 0.1500 | 3613 | 1135 | 113 | 4.30  | 0.8430 | 0.8570 | 0.1430 | 0.1570 | 3553 | 1324 | 123 | 3672 | 1226 | 102 | 28.84 | 8.72  |
| 5000 | 0.90 | 0.8500 | 0.1500 | 3613 | 1148 | 113 | 3.52  | 0.8430 | 0.8570 | 0.1430 | 0.1570 | 3553 | 1324 | 123 | 3672 | 1226 | 102 | 25.33 | 6.97  |
| 5000 | 0.91 | 0.8500 | 0.1500 | 3613 | 1160 | 113 | 2.83  | 0.8430 | 0.8570 | 0.1430 | 0.1570 | 3553 | 1324 | 123 | 3672 | 1226 | 102 | 22.06 | 5.48  |
| 5000 | 0.92 | 0.8500 | 0.1500 | 3613 | 1173 | 113 | 2.22  | 0.8430 | 0.8570 | 0.1430 | 0.1570 | 3553 | 1324 | 123 | 3672 | 1226 | 102 | 19.04 | 4.25  |
| 5000 | 0.93 | 0.8500 | 0.1500 | 3613 | 1186 | 113 | 1.68  | 0.8430 | 0.8570 | 0.1430 | 0.1570 | 3553 | 1324 | 123 | 3672 | 1226 | 102 | 16.26 | 3.29  |
| 5000 | 0.94 | 0.8500 | 0.1500 | 3613 | 1199 | 113 | 1.23  | 0.8430 | 0.8570 | 0.1430 | 0.1570 | 3553 | 1324 | 123 | 3672 | 1226 | 102 | 13.73 | 2.60  |
| 5000 | 0.95 | 0.8500 | 0.1500 | 3613 | 1211 | 113 | 0.84  | 0.8430 | 0.8570 | 0.1430 | 0.1570 | 3553 | 1324 | 123 | 3672 | 1226 | 102 | 11.44 | 2.17  |
| 5000 | 0.96 | 0.8500 | 0.1500 | 3613 | 1224 | 113 | 0.54  | 0.8430 | 0.8570 | 0.1430 | 0.1570 | 3553 | 1324 | 123 | 3672 | 1226 | 102 | 9.40  | 2.00  |
| 5000 | 0.97 | 0.8500 | 0.1500 | 3613 | 1237 | 113 | 0.30  | 0.8430 | 0.8570 | 0.1430 | 0.1570 | 3553 | 1324 | 123 | 3672 | 1226 | 102 | 7.61  | 2.10  |
| 5000 | 0.98 | 0.8500 | 0.1500 | 3613 | 1250 | 113 | 0.13  | 0.8430 | 0.8570 | 0.1430 | 0.1570 | 3553 | 1324 | 123 | 3672 | 1226 | 102 | 6.06  | 2.47  |
| 5000 | 0.99 | 0.8500 | 0.1500 | 3613 | 1262 | 113 | 0.03  | 0.8430 | 0.8570 | 0.1430 | 0.1570 | 3553 | 1324 | 123 | 3672 | 1226 | 102 | 4.76  | 3.10  |
| 5000 | 1.00 | 0.8500 | 0.1500 | 3613 | 1275 | 113 | 0.00  | 0.8430 | 0.8570 | 0.1430 | 0.1570 | 3553 | 1324 | 123 | 3672 | 1226 | 102 | 3.70  | 4.00  |
| 5000 | 1.01 | 0.8500 | 0.1500 | 3613 | 1288 | 113 | 0.03  | 0.8430 | 0.8570 | 0.1430 | 0.1570 | 3553 | 1324 | 123 | 3672 | 1226 | 102 | 2.89  | 5.16  |
| 5000 | 1.02 | 0.8500 | 0.1500 | 3613 | 1301 | 113 | 0.13  | 0.8430 | 0.8570 | 0.1430 | 0.1570 | 3553 | 1324 | 123 | 3672 | 1226 | 102 | 2.32  | 6.59  |
| 5000 | 1.03 | 0.8500 | 0.1500 | 3613 | 1313 | 113 | 0.29  | 0.8430 | 0.8570 | 0.1430 | 0.1570 | 3553 | 1324 | 123 | 3672 | 1226 | 102 | 2.00  | 8.28  |
| 5000 | 1.04 | 0.8500 | 0.1500 | 3613 | 1326 | 113 | 0.51  | 0.8430 | 0.8570 | 0.1430 | 0.1570 | 3553 | 1324 | 123 | 3672 | 1226 | 102 | 1.93  | 10.24 |
| 5000 | 1.05 | 0.8500 | 0.1500 | 3613 | 1339 | 113 | 0.78  | 0.8430 | 0.8570 | 0.1430 | 0.1570 | 3553 | 1324 | 123 | 3672 | 1226 | 102 | 2.10  | 12.46 |
| 5000 | 1.06 | 0.8500 | 0.1500 | 3613 | 1352 | 113 | 1.12  | 0.8430 | 0.8570 | 0.1430 | 0.1570 | 3553 | 1324 | 123 | 3672 | 1226 | 102 | 2.52  | 14.95 |
| 5000 | 1.07 | 0.8500 | 0.1500 | 3613 | 1364 | 113 | 1.52  | 0.8430 | 0.8570 | 0.1430 | 0.1570 | 3553 | 1324 | 123 | 3672 | 1226 | 102 | 3.18  | 17.70 |
| 5000 | 1.08 | 0.8500 | 0.1500 | 3613 | 1377 | 113 | 1.97  | 0.8430 | 0.8570 | 0.1430 | 0.1570 | 3553 | 1324 | 123 | 3672 | 1226 | 102 | 4.09  | 20.72 |
| 5000 | 1.09 | 0.8500 | 0.1500 | 3613 | 1390 | 113 | 2.47  | 0.8430 | 0.8570 | 0.1430 | 0.1570 | 3553 | 1324 | 123 | 3672 | 1226 | 102 | 5.24  | 24.01 |
| 5000 | 1.10 | 0.8500 | 0.1500 | 3613 | 1403 | 113 | 3.03  | 0.8430 | 0.8570 | 0.1430 | 0.1570 | 3553 | 1324 | 123 | 3672 | 1226 | 102 | 6.64  | 27.56 |
| 5000 | 1.11 | 0.8500 | 0.1500 | 3613 | 1415 | 113 | 3.64  | 0.8430 | 0.8570 | 0.1430 | 0.1570 | 3553 | 1324 | 123 | 3672 | 1226 | 102 | 8.28  | 31.37 |
| 5000 | 1.12 | 0.8500 | 0.1500 | 3613 | 1428 | 113 | 4.31  | 0.8430 | 0.8570 | 0.1430 | 0.1570 | 3553 | 1324 | 123 | 3672 | 1226 | 102 | 10.18 | 35.45 |
| 5000 | 1.13 | 0.8500 | 0.1500 | 3613 | 1441 | 113 | 5.02  | 0.8430 | 0.8570 | 0.1430 | 0.1570 | 3553 | 1324 | 123 | 3672 | 1226 | 102 | 12.31 | 39.80 |
| 5000 | 1.14 | 0.8500 | 0.1500 | 3613 | 1454 | 113 | 5.79  | 0.8430 | 0.8570 | 0.1430 | 0.1570 | 3553 | 1324 | 123 | 3672 | 1226 | 102 | 14.69 | 44.41 |
| 5000 | 1.15 | 0.8500 | 0.1500 | 3613 | 1466 | 113 | 6.60  | 0.8430 | 0.8570 | 0.1430 | 0.1570 | 3553 | 1324 | 123 | 3672 | 1226 | 102 | 17.32 | 49.29 |

|      |      |        |        |      |      |     |       |        |        |        |        |      |      |     |      |      |     |       |       |
|------|------|--------|--------|------|------|-----|-------|--------|--------|--------|--------|------|------|-----|------|------|-----|-------|-------|
| 5000 | 1.16 | 0.8500 | 0.1500 | 3613 | 1479 | 113 | 7.47  | 0.8430 | 0.8570 | 0.1430 | 0.1570 | 3553 | 1324 | 123 | 3672 | 1226 | 102 | 20.19 | 54.43 |
| 5000 | 1.17 | 0.8500 | 0.1500 | 3613 | 1492 | 113 | 8.38  | 0.8430 | 0.8570 | 0.1430 | 0.1570 | 3553 | 1324 | 123 | 3672 | 1226 | 102 | 23.31 | 59.84 |
| 5000 | 1.18 | 0.8500 | 0.1500 | 3613 | 1505 | 113 | 9.34  | 0.8430 | 0.8570 | 0.1430 | 0.1570 | 3553 | 1324 | 123 | 3672 | 1226 | 102 | 26.68 | 65.51 |
| 5000 | 1.19 | 0.8500 | 0.1500 | 3613 | 1517 | 113 | 10.34 | 0.8430 | 0.8570 | 0.1430 | 0.1570 | 3553 | 1324 | 123 | 3672 | 1226 | 102 | 30.29 | 71.44 |
| 5000 | 1.20 | 0.8500 | 0.1500 | 3613 | 1530 | 113 | 11.39 | 0.8430 | 0.8570 | 0.1430 | 0.1570 | 3553 | 1324 | 123 | 3672 | 1226 | 102 | 34.14 | 77.65 |
| 5000 | 0.80 | 0.9000 | 0.1000 | 4050 | 720  | 50  | 7.84  | 0.8941 | 0.9059 | 0.0941 | 0.1059 | 3997 | 947  | 56  | 4103 | 853  | 44  | 55.63 | 22.05 |
| 5000 | 0.81 | 0.9000 | 0.1000 | 4050 | 729  | 50  | 6.99  | 0.8941 | 0.9059 | 0.0941 | 0.1059 | 3997 | 947  | 56  | 4103 | 853  | 44  | 51.41 | 19.34 |
| 5000 | 0.82 | 0.9000 | 0.1000 | 4050 | 738  | 50  | 6.21  | 0.8941 | 0.9059 | 0.0941 | 0.1059 | 3997 | 947  | 56  | 4103 | 853  | 44  | 47.36 | 16.83 |
| 5000 | 0.83 | 0.9000 | 0.1000 | 4050 | 747  | 50  | 5.48  | 0.8941 | 0.9059 | 0.0941 | 0.1059 | 3997 | 947  | 56  | 4103 | 853  | 44  | 43.47 | 14.50 |
| 5000 | 0.84 | 0.9000 | 0.1000 | 4050 | 756  | 50  | 4.81  | 0.8941 | 0.9059 | 0.0941 | 0.1059 | 3997 | 947  | 56  | 4103 | 853  | 44  | 39.76 | 12.37 |
| 5000 | 0.85 | 0.9000 | 0.1000 | 4050 | 765  | 50  | 4.18  | 0.8941 | 0.9059 | 0.0941 | 0.1059 | 3997 | 947  | 56  | 4103 | 853  | 44  | 36.22 | 10.43 |
| 5000 | 0.86 | 0.9000 | 0.1000 | 4050 | 774  | 50  | 3.60  | 0.8941 | 0.9059 | 0.0941 | 0.1059 | 3997 | 947  | 56  | 4103 | 853  | 44  | 32.85 | 8.67  |
| 5000 | 0.87 | 0.9000 | 0.1000 | 4050 | 783  | 50  | 3.08  | 0.8941 | 0.9059 | 0.0941 | 0.1059 | 3997 | 947  | 56  | 4103 | 853  | 44  | 29.65 | 7.11  |
| 5000 | 0.88 | 0.9000 | 0.1000 | 4050 | 792  | 50  | 2.60  | 0.8941 | 0.9059 | 0.0941 | 0.1059 | 3997 | 947  | 56  | 4103 | 853  | 44  | 26.63 | 5.73  |
| 5000 | 0.89 | 0.9000 | 0.1000 | 4050 | 801  | 50  | 2.16  | 0.8941 | 0.9059 | 0.0941 | 0.1059 | 3997 | 947  | 56  | 4103 | 853  | 44  | 23.77 | 4.55  |
| 5000 | 0.90 | 0.9000 | 0.1000 | 4050 | 810  | 50  | 1.77  | 0.8941 | 0.9059 | 0.0941 | 0.1059 | 3997 | 947  | 56  | 4103 | 853  | 44  | 21.09 | 3.55  |
| 5000 | 0.91 | 0.9000 | 0.1000 | 4050 | 819  | 50  | 1.42  | 0.8941 | 0.9059 | 0.0941 | 0.1059 | 3997 | 947  | 56  | 4103 | 853  | 44  | 18.57 | 2.75  |
| 5000 | 0.92 | 0.9000 | 0.1000 | 4050 | 828  | 50  | 1.11  | 0.8941 | 0.9059 | 0.0941 | 0.1059 | 3997 | 947  | 56  | 4103 | 853  | 44  | 16.23 | 2.13  |
| 5000 | 0.93 | 0.9000 | 0.1000 | 4050 | 837  | 50  | 0.84  | 0.8941 | 0.9059 | 0.0941 | 0.1059 | 3997 | 947  | 56  | 4103 | 853  | 44  | 14.06 | 1.71  |
| 5000 | 0.94 | 0.9000 | 0.1000 | 4050 | 846  | 50  | 0.61  | 0.8941 | 0.9059 | 0.0941 | 0.1059 | 3997 | 947  | 56  | 4103 | 853  | 44  | 12.06 | 1.47  |
| 5000 | 0.95 | 0.9000 | 0.1000 | 4050 | 855  | 50  | 0.42  | 0.8941 | 0.9059 | 0.0941 | 0.1059 | 3997 | 947  | 56  | 4103 | 853  | 44  | 10.23 | 1.43  |
| 5000 | 0.96 | 0.9000 | 0.1000 | 4050 | 864  | 50  | 0.27  | 0.8941 | 0.9059 | 0.0941 | 0.1059 | 3997 | 947  | 56  | 4103 | 853  | 44  | 8.57  | 1.57  |
| 5000 | 0.97 | 0.9000 | 0.1000 | 4050 | 873  | 50  | 0.15  | 0.8941 | 0.9059 | 0.0941 | 0.1059 | 3997 | 947  | 56  | 4103 | 853  | 44  | 7.09  | 1.91  |
| 5000 | 0.98 | 0.9000 | 0.1000 | 4050 | 882  | 50  | 0.07  | 0.8941 | 0.9059 | 0.0941 | 0.1059 | 3997 | 947  | 56  | 4103 | 853  | 44  | 5.77  | 2.44  |
| 5000 | 0.99 | 0.9000 | 0.1000 | 4050 | 891  | 50  | 0.02  | 0.8941 | 0.9059 | 0.0941 | 0.1059 | 3997 | 947  | 56  | 4103 | 853  | 44  | 4.63  | 3.15  |
| 5000 | 1.00 | 0.9000 | 0.1000 | 4050 | 900  | 50  | 0.00  | 0.8941 | 0.9059 | 0.0941 | 0.1059 | 3997 | 947  | 56  | 4103 | 853  | 44  | 3.65  | 4.06  |
| 5000 | 1.01 | 0.9000 | 0.1000 | 4050 | 909  | 50  | 0.02  | 0.8941 | 0.9059 | 0.0941 | 0.1059 | 3997 | 947  | 56  | 4103 | 853  | 44  | 2.85  | 5.15  |
| 5000 | 1.02 | 0.9000 | 0.1000 | 4050 | 918  | 50  | 0.06  | 0.8941 | 0.9059 | 0.0941 | 0.1059 | 3997 | 947  | 56  | 4103 | 853  | 44  | 2.22  | 6.44  |
| 5000 | 1.03 | 0.9000 | 0.1000 | 4050 | 927  | 50  | 0.14  | 0.8941 | 0.9059 | 0.0941 | 0.1059 | 3997 | 947  | 56  | 4103 | 853  | 44  | 1.76  | 7.91  |
| 5000 | 1.04 | 0.9000 | 0.1000 | 4050 | 936  | 50  | 0.25  | 0.8941 | 0.9059 | 0.0941 | 0.1059 | 3997 | 947  | 56  | 4103 | 853  | 44  | 1.47  | 9.58  |
| 5000 | 1.05 | 0.9000 | 0.1000 | 4050 | 945  | 50  | 0.39  | 0.8941 | 0.9059 | 0.0941 | 0.1059 | 3997 | 947  | 56  | 4103 | 853  | 44  | 1.35  | 11.43 |
| 5000 | 1.06 | 0.9000 | 0.1000 | 4050 | 954  | 50  | 0.56  | 0.8941 | 0.9059 | 0.0941 | 0.1059 | 3997 | 947  | 56  | 4103 | 853  | 44  | 1.41  | 13.48 |
| 5000 | 1.07 | 0.9000 | 0.1000 | 4050 | 963  | 50  | 0.75  | 0.8941 | 0.9059 | 0.0941 | 0.1059 | 3997 | 947  | 56  | 4103 | 853  | 44  | 1.63  | 15.71 |
| 5000 | 1.08 | 0.9000 | 0.1000 | 4050 | 972  | 50  | 0.97  | 0.8941 | 0.9059 | 0.0941 | 0.1059 | 3997 | 947  | 56  | 4103 | 853  | 44  | 2.03  | 18.14 |
| 5000 | 1.09 | 0.9000 | 0.1000 | 4050 | 981  | 50  | 1.22  | 0.8941 | 0.9059 | 0.0941 | 0.1059 | 3997 | 947  | 56  | 4103 | 853  | 44  | 2.59  | 20.75 |

|      |      |        |        |      |      |    |      |        |        |        |        |      |     |    |      |     |    |       |       |
|------|------|--------|--------|------|------|----|------|--------|--------|--------|--------|------|-----|----|------|-----|----|-------|-------|
| 5000 | 1.10 | 0.9000 | 0.1000 | 4050 | 990  | 50 | 1.50 | 0.8941 | 0.9059 | 0.0941 | 0.1059 | 3997 | 947 | 56 | 4103 | 853 | 44 | 3.33  | 23.56 |
| 5000 | 1.11 | 0.9000 | 0.1000 | 4050 | 999  | 50 | 1.80 | 0.8941 | 0.9059 | 0.0941 | 0.1059 | 3997 | 947 | 56 | 4103 | 853 | 44 | 4.24  | 26.56 |
| 5000 | 1.12 | 0.9000 | 0.1000 | 4050 | 1008 | 50 | 2.13 | 0.8941 | 0.9059 | 0.0941 | 0.1059 | 3997 | 947 | 56 | 4103 | 853 | 44 | 5.32  | 29.74 |
| 5000 | 1.13 | 0.9000 | 0.1000 | 4050 | 1017 | 50 | 2.48 | 0.8941 | 0.9059 | 0.0941 | 0.1059 | 3997 | 947 | 56 | 4103 | 853 | 44 | 6.57  | 33.12 |
| 5000 | 1.14 | 0.9000 | 0.1000 | 4050 | 1026 | 50 | 2.86 | 0.8941 | 0.9059 | 0.0941 | 0.1059 | 3997 | 947 | 56 | 4103 | 853 | 44 | 7.99  | 36.68 |
| 5000 | 1.15 | 0.9000 | 0.1000 | 4050 | 1035 | 50 | 3.26 | 0.8941 | 0.9059 | 0.0941 | 0.1059 | 3997 | 947 | 56 | 4103 | 853 | 44 | 9.59  | 40.44 |
| 5000 | 1.16 | 0.9000 | 0.1000 | 4050 | 1044 | 50 | 3.68 | 0.8941 | 0.9059 | 0.0941 | 0.1059 | 3997 | 947 | 56 | 4103 | 853 | 44 | 11.35 | 44.38 |
| 5000 | 1.17 | 0.9000 | 0.1000 | 4050 | 1053 | 50 | 4.13 | 0.8941 | 0.9059 | 0.0941 | 0.1059 | 3997 | 947 | 56 | 4103 | 853 | 44 | 13.29 | 48.52 |
| 5000 | 1.18 | 0.9000 | 0.1000 | 4050 | 1062 | 50 | 4.60 | 0.8941 | 0.9059 | 0.0941 | 0.1059 | 3997 | 947 | 56 | 4103 | 853 | 44 | 15.39 | 52.84 |
| 5000 | 1.19 | 0.9000 | 0.1000 | 4050 | 1071 | 50 | 5.09 | 0.8941 | 0.9059 | 0.0941 | 0.1059 | 3997 | 947 | 56 | 4103 | 853 | 44 | 17.67 | 57.36 |
| 5000 | 1.20 | 0.9000 | 0.1000 | 4050 | 1080 | 50 | 5.61 | 0.8941 | 0.9059 | 0.0941 | 0.1059 | 3997 | 947 | 56 | 4103 | 853 | 44 | 20.12 | 62.06 |
| 5000 | 0.80 | 0.9500 | 0.0500 | 4513 | 380  | 13 | 2.23 | 0.9457 | 0.9543 | 0.0457 | 0.0543 | 4472 | 513 | 15 | 4553 | 436 | 10 | 35.30 | 8.05  |
| 5000 | 0.81 | 0.9500 | 0.0500 | 4513 | 385  | 13 | 1.99 | 0.9457 | 0.9543 | 0.0457 | 0.0543 | 4472 | 513 | 15 | 4553 | 436 | 10 | 32.88 | 6.87  |
| 5000 | 0.82 | 0.9500 | 0.0500 | 4513 | 390  | 13 | 1.76 | 0.9457 | 0.9543 | 0.0457 | 0.0543 | 4472 | 513 | 15 | 4553 | 436 | 10 | 30.55 | 5.80  |
| 5000 | 0.83 | 0.9500 | 0.0500 | 4513 | 394  | 13 | 1.55 | 0.9457 | 0.9543 | 0.0457 | 0.0543 | 4472 | 513 | 15 | 4553 | 436 | 10 | 28.30 | 4.83  |
| 5000 | 0.84 | 0.9500 | 0.0500 | 4513 | 399  | 13 | 1.36 | 0.9457 | 0.9543 | 0.0457 | 0.0543 | 4472 | 513 | 15 | 4553 | 436 | 10 | 26.14 | 3.96  |
| 5000 | 0.85 | 0.9500 | 0.0500 | 4513 | 404  | 13 | 1.18 | 0.9457 | 0.9543 | 0.0457 | 0.0543 | 4472 | 513 | 15 | 4553 | 436 | 10 | 24.07 | 3.20  |
| 5000 | 0.86 | 0.9500 | 0.0500 | 4513 | 409  | 13 | 1.02 | 0.9457 | 0.9543 | 0.0457 | 0.0543 | 4472 | 513 | 15 | 4553 | 436 | 10 | 22.09 | 2.54  |
| 5000 | 0.87 | 0.9500 | 0.0500 | 4513 | 413  | 13 | 0.87 | 0.9457 | 0.9543 | 0.0457 | 0.0543 | 4472 | 513 | 15 | 4553 | 436 | 10 | 20.19 | 1.99  |
| 5000 | 0.88 | 0.9500 | 0.0500 | 4513 | 418  | 13 | 0.73 | 0.9457 | 0.9543 | 0.0457 | 0.0543 | 4472 | 513 | 15 | 4553 | 436 | 10 | 18.38 | 1.54  |
| 5000 | 0.89 | 0.9500 | 0.0500 | 4513 | 423  | 13 | 0.61 | 0.9457 | 0.9543 | 0.0457 | 0.0543 | 4472 | 513 | 15 | 4553 | 436 | 10 | 16.67 | 1.19  |
| 5000 | 0.90 | 0.9500 | 0.0500 | 4513 | 428  | 13 | 0.50 | 0.9457 | 0.9543 | 0.0457 | 0.0543 | 4472 | 513 | 15 | 4553 | 436 | 10 | 15.03 | .94   |
| 5000 | 0.91 | 0.9500 | 0.0500 | 4513 | 432  | 13 | 0.40 | 0.9457 | 0.9543 | 0.0457 | 0.0543 | 4472 | 513 | 15 | 4553 | 436 | 10 | 13.49 | .80   |
| 5000 | 0.92 | 0.9500 | 0.0500 | 4513 | 437  | 13 | 0.31 | 0.9457 | 0.9543 | 0.0457 | 0.0543 | 4472 | 513 | 15 | 4553 | 436 | 10 | 12.03 | .76   |
| 5000 | 0.93 | 0.9500 | 0.0500 | 4513 | 442  | 13 | 0.24 | 0.9457 | 0.9543 | 0.0457 | 0.0543 | 4472 | 513 | 15 | 4553 | 436 | 10 | 10.67 | .83   |
| 5000 | 0.94 | 0.9500 | 0.0500 | 4513 | 447  | 13 | 0.17 | 0.9457 | 0.9543 | 0.0457 | 0.0543 | 4472 | 513 | 15 | 4553 | 436 | 10 | 9.39  | 1.00  |
| 5000 | 0.95 | 0.9500 | 0.0500 | 4513 | 451  | 13 | 0.12 | 0.9457 | 0.9543 | 0.0457 | 0.0543 | 4472 | 513 | 15 | 4553 | 436 | 10 | 8.20  | 1.27  |
| 5000 | 0.96 | 0.9500 | 0.0500 | 4513 | 456  | 13 | 0.07 | 0.9457 | 0.9543 | 0.0457 | 0.0543 | 4472 | 513 | 15 | 4553 | 436 | 10 | 7.09  | 1.65  |
| 5000 | 0.97 | 0.9500 | 0.0500 | 4513 | 461  | 13 | 0.04 | 0.9457 | 0.9543 | 0.0457 | 0.0543 | 4472 | 513 | 15 | 4553 | 436 | 10 | 6.08  | 2.13  |
| 5000 | 0.98 | 0.9500 | 0.0500 | 4513 | 466  | 13 | 0.02 | 0.9457 | 0.9543 | 0.0457 | 0.0543 | 4472 | 513 | 15 | 4553 | 436 | 10 | 5.15  | 2.71  |
| 5000 | 0.99 | 0.9500 | 0.0500 | 4513 | 470  | 13 | 0.00 | 0.9457 | 0.9543 | 0.0457 | 0.0543 | 4472 | 513 | 15 | 4553 | 436 | 10 | 4.31  | 3.39  |
| 5000 | 1.00 | 0.9500 | 0.0500 | 4513 | 475  | 13 | 0.00 | 0.9457 | 0.9543 | 0.0457 | 0.0543 | 4472 | 513 | 15 | 4553 | 436 | 10 | 3.56  | 4.18  |
| 5000 | 1.01 | 0.9500 | 0.0500 | 4513 | 480  | 13 | 0.00 | 0.9457 | 0.9543 | 0.0457 | 0.0543 | 4472 | 513 | 15 | 4553 | 436 | 10 | 2.89  | 5.08  |
| 5000 | 1.02 | 0.9500 | 0.0500 | 4513 | 485  | 13 | 0.02 | 0.9457 | 0.9543 | 0.0457 | 0.0543 | 4472 | 513 | 15 | 4553 | 436 | 10 | 2.32  | 6.07  |
| 5000 | 1.03 | 0.9500 | 0.0500 | 4513 | 489  | 13 | 0.04 | 0.9457 | 0.9543 | 0.0457 | 0.0543 | 4472 | 513 | 15 | 4553 | 436 | 10 | 1.83  | 7.17  |

|      |      |        |        |      |     |    |      |        |        |        |        |      |     |    |      |     |    |      |       |
|------|------|--------|--------|------|-----|----|------|--------|--------|--------|--------|------|-----|----|------|-----|----|------|-------|
| 5000 | 1.04 | 0.9500 | 0.0500 | 4513 | 494 | 13 | 0.07 | 0.9457 | 0.9543 | 0.0457 | 0.0543 | 4472 | 513 | 15 | 4553 | 436 | 10 | 1.43 | 8.37  |
| 5000 | 1.05 | 0.9500 | 0.0500 | 4513 | 499 | 13 | 0.11 | 0.9457 | 0.9543 | 0.0457 | 0.0543 | 4472 | 513 | 15 | 4553 | 436 | 10 | 1.11 | 9.68  |
| 5000 | 1.06 | 0.9500 | 0.0500 | 4513 | 504 | 13 | 0.15 | 0.9457 | 0.9543 | 0.0457 | 0.0543 | 4472 | 513 | 15 | 4553 | 436 | 10 | .89  | 11.09 |
| 5000 | 1.07 | 0.9500 | 0.0500 | 4513 | 508 | 13 | 0.21 | 0.9457 | 0.9543 | 0.0457 | 0.0543 | 4472 | 513 | 15 | 4553 | 436 | 10 | .75  | 12.60 |
| 5000 | 1.08 | 0.9500 | 0.0500 | 4513 | 513 | 13 | 0.27 | 0.9457 | 0.9543 | 0.0457 | 0.0543 | 4472 | 513 | 15 | 4553 | 436 | 10 | .70  | 14.22 |
| 5000 | 1.09 | 0.9500 | 0.0500 | 4513 | 518 | 13 | 0.34 | 0.9457 | 0.9543 | 0.0457 | 0.0543 | 4472 | 513 | 15 | 4553 | 436 | 10 | .74  | 15.94 |
| 5000 | 1.10 | 0.9500 | 0.0500 | 4513 | 523 | 13 | 0.41 | 0.9457 | 0.9543 | 0.0457 | 0.0543 | 4472 | 513 | 15 | 4553 | 436 | 10 | .87  | 17.76 |
| 5000 | 1.11 | 0.9500 | 0.0500 | 4513 | 527 | 13 | 0.50 | 0.9457 | 0.9543 | 0.0457 | 0.0543 | 4472 | 513 | 15 | 4553 | 436 | 10 | 1.08 | 19.69 |
| 5000 | 1.12 | 0.9500 | 0.0500 | 4513 | 532 | 13 | 0.59 | 0.9457 | 0.9543 | 0.0457 | 0.0543 | 4472 | 513 | 15 | 4553 | 436 | 10 | 1.39 | 21.72 |
| 5000 | 1.13 | 0.9500 | 0.0500 | 4513 | 537 | 13 | 0.68 | 0.9457 | 0.9543 | 0.0457 | 0.0543 | 4472 | 513 | 15 | 4553 | 436 | 10 | 1.78 | 23.85 |
| 5000 | 1.14 | 0.9500 | 0.0500 | 4513 | 542 | 13 | 0.79 | 0.9457 | 0.9543 | 0.0457 | 0.0543 | 4472 | 513 | 15 | 4553 | 436 | 10 | 2.26 | 26.09 |
| 5000 | 1.15 | 0.9500 | 0.0500 | 4513 | 546 | 13 | 0.90 | 0.9457 | 0.9543 | 0.0457 | 0.0543 | 4472 | 513 | 15 | 4553 | 436 | 10 | 2.82 | 28.43 |
| 5000 | 1.16 | 0.9500 | 0.0500 | 4513 | 551 | 13 | 1.01 | 0.9457 | 0.9543 | 0.0457 | 0.0543 | 4472 | 513 | 15 | 4553 | 436 | 10 | 3.48 | 30.87 |
| 5000 | 1.17 | 0.9500 | 0.0500 | 4513 | 556 | 13 | 1.14 | 0.9457 | 0.9543 | 0.0457 | 0.0543 | 4472 | 513 | 15 | 4553 | 436 | 10 | 4.22 | 33.42 |
| 5000 | 1.18 | 0.9500 | 0.0500 | 4513 | 561 | 13 | 1.27 | 0.9457 | 0.9543 | 0.0457 | 0.0543 | 4472 | 513 | 15 | 4553 | 436 | 10 | 5.05 | 36.07 |
| 5000 | 1.19 | 0.9500 | 0.0500 | 4513 | 565 | 13 | 1.40 | 0.9457 | 0.9543 | 0.0457 | 0.0543 | 4472 | 513 | 15 | 4553 | 436 | 10 | 5.97 | 38.83 |
| 5000 | 1.20 | 0.9500 | 0.0500 | 4513 | 570 | 13 | 1.54 | 0.9457 | 0.9543 | 0.0457 | 0.0543 | 4472 | 513 | 15 | 4553 | 436 | 10 | 6.98 | 41.68 |
| 5000 | 0.80 | 1.0000 | 0.0000 | 5000 | 0   | 0  | 1.54 | 1.0000 | 1.0000 | 0.0000 | 0.0000 | 5000 | 0   | 0  | 5000 | 0   | 0  | .    | .     |
| 5000 | 0.81 | 1.0000 | 0.0000 | 5000 | 0   | 0  | 1.54 | 1.0000 | 1.0000 | 0.0000 | 0.0000 | 5000 | 0   | 0  | 5000 | 0   | 0  | .    | .     |
| 5000 | 0.82 | 1.0000 | 0.0000 | 5000 | 0   | 0  | 1.54 | 1.0000 | 1.0000 | 0.0000 | 0.0000 | 5000 | 0   | 0  | 5000 | 0   | 0  | .    | .     |
| 5000 | 0.83 | 1.0000 | 0.0000 | 5000 | 0   | 0  | 1.54 | 1.0000 | 1.0000 | 0.0000 | 0.0000 | 5000 | 0   | 0  | 5000 | 0   | 0  | .    | .     |
| 5000 | 0.84 | 1.0000 | 0.0000 | 5000 | 0   | 0  | 1.54 | 1.0000 | 1.0000 | 0.0000 | 0.0000 | 5000 | 0   | 0  | 5000 | 0   | 0  | .    | .     |
| 5000 | 0.85 | 1.0000 | 0.0000 | 5000 | 0   | 0  | 1.54 | 1.0000 | 1.0000 | 0.0000 | 0.0000 | 5000 | 0   | 0  | 5000 | 0   | 0  | .    | .     |
| 5000 | 0.86 | 1.0000 | 0.0000 | 5000 | 0   | 0  | 1.54 | 1.0000 | 1.0000 | 0.0000 | 0.0000 | 5000 | 0   | 0  | 5000 | 0   | 0  | .    | .     |
| 5000 | 0.87 | 1.0000 | 0.0000 | 5000 | 0   | 0  | 1.54 | 1.0000 | 1.0000 | 0.0000 | 0.0000 | 5000 | 0   | 0  | 5000 | 0   | 0  | .    | .     |
| 5000 | 0.88 | 1.0000 | 0.0000 | 5000 | 0   | 0  | 1.54 | 1.0000 | 1.0000 | 0.0000 | 0.0000 | 5000 | 0   | 0  | 5000 | 0   | 0  | .    | .     |
| 5000 | 0.89 | 1.0000 | 0.0000 | 5000 | 0   | 0  | 1.54 | 1.0000 | 1.0000 | 0.0000 | 0.0000 | 5000 | 0   | 0  | 5000 | 0   | 0  | .    | .     |
| 5000 | 0.90 | 1.0000 | 0.0000 | 5000 | 0   | 0  | 1.54 | 1.0000 | 1.0000 | 0.0000 | 0.0000 | 5000 | 0   | 0  | 5000 | 0   | 0  | .    | .     |
| 5000 | 0.91 | 1.0000 | 0.0000 | 5000 | 0   | 0  | 1.54 | 1.0000 | 1.0000 | 0.0000 | 0.0000 | 5000 | 0   | 0  | 5000 | 0   | 0  | .    | .     |
| 5000 | 0.92 | 1.0000 | 0.0000 | 5000 | 0   | 0  | 1.54 | 1.0000 | 1.0000 | 0.0000 | 0.0000 | 5000 | 0   | 0  | 5000 | 0   | 0  | .    | .     |
| 5000 | 0.93 | 1.0000 | 0.0000 | 5000 | 0   | 0  | 1.54 | 1.0000 | 1.0000 | 0.0000 | 0.0000 | 5000 | 0   | 0  | 5000 | 0   | 0  | .    | .     |
| 5000 | 0.94 | 1.0000 | 0.0000 | 5000 | 0   | 0  | 1.54 | 1.0000 | 1.0000 | 0.0000 | 0.0000 | 5000 | 0   | 0  | 5000 | 0   | 0  | .    | .     |
| 5000 | 0.95 | 1.0000 | 0.0000 | 5000 | 0   | 0  | 1.54 | 1.0000 | 1.0000 | 0.0000 | 0.0000 | 5000 | 0   | 0  | 5000 | 0   | 0  | .    | .     |
| 5000 | 0.96 | 1.0000 | 0.0000 | 5000 | 0   | 0  | 1.54 | 1.0000 | 1.0000 | 0.0000 | 0.0000 | 5000 | 0   | 0  | 5000 | 0   | 0  | .    | .     |
| 5000 | 0.97 | 1.0000 | 0.0000 | 5000 | 0   | 0  | 1.54 | 1.0000 | 1.0000 | 0.0000 | 0.0000 | 5000 | 0   | 0  | 5000 | 0   | 0  | .    | .     |

|       |      |        |        |      |     |      |      |        |        |        |        |      |     |      |      |      |      |       |       |
|-------|------|--------|--------|------|-----|------|------|--------|--------|--------|--------|------|-----|------|------|------|------|-------|-------|
| 5000  | 0.98 | 1.0000 | 0.0000 | 5000 | 0   | 0    | 1.54 | 1.0000 | 1.0000 | 0.0000 | 0.0000 | 5000 | 0   | 0    | 5000 | 0    | 0    | .     | .     |
| 5000  | 0.99 | 1.0000 | 0.0000 | 5000 | 0   | 0    | 1.54 | 1.0000 | 1.0000 | 0.0000 | 0.0000 | 5000 | 0   | 0    | 5000 | 0    | 0    | .     | .     |
| 5000  | 1.00 | 1.0000 | 0.0000 | 5000 | 0   | 0    | 1.54 | 1.0000 | 1.0000 | 0.0000 | 0.0000 | 5000 | 0   | 0    | 5000 | 0    | 0    | .     | .     |
| 5000  | 1.01 | 1.0000 | 0.0000 | 5000 | 0   | 0    | 1.54 | 1.0000 | 1.0000 | 0.0000 | 0.0000 | 5000 | 0   | 0    | 5000 | 0    | 0    | .     | .     |
| 5000  | 1.02 | 1.0000 | 0.0000 | 5000 | 0   | 0    | 1.54 | 1.0000 | 1.0000 | 0.0000 | 0.0000 | 5000 | 0   | 0    | 5000 | 0    | 0    | .     | .     |
| 5000  | 1.03 | 1.0000 | 0.0000 | 5000 | 0   | 0    | 1.54 | 1.0000 | 1.0000 | 0.0000 | 0.0000 | 5000 | 0   | 0    | 5000 | 0    | 0    | .     | .     |
| 5000  | 1.04 | 1.0000 | 0.0000 | 5000 | 0   | 0    | 1.54 | 1.0000 | 1.0000 | 0.0000 | 0.0000 | 5000 | 0   | 0    | 5000 | 0    | 0    | .     | .     |
| 5000  | 1.05 | 1.0000 | 0.0000 | 5000 | 0   | 0    | 1.54 | 1.0000 | 1.0000 | 0.0000 | 0.0000 | 5000 | 0   | 0    | 5000 | 0    | 0    | .     | .     |
| 5000  | 1.06 | 1.0000 | 0.0000 | 5000 | 0   | 0    | 1.54 | 1.0000 | 1.0000 | 0.0000 | 0.0000 | 5000 | 0   | 0    | 5000 | 0    | 0    | .     | .     |
| 5000  | 1.07 | 1.0000 | 0.0000 | 5000 | 0   | 0    | 1.54 | 1.0000 | 1.0000 | 0.0000 | 0.0000 | 5000 | 0   | 0    | 5000 | 0    | 0    | .     | .     |
| 5000  | 1.08 | 1.0000 | 0.0000 | 5000 | 0   | 0    | 1.54 | 1.0000 | 1.0000 | 0.0000 | 0.0000 | 5000 | 0   | 0    | 5000 | 0    | 0    | .     | .     |
| 5000  | 1.09 | 1.0000 | 0.0000 | 5000 | 0   | 0    | 1.54 | 1.0000 | 1.0000 | 0.0000 | 0.0000 | 5000 | 0   | 0    | 5000 | 0    | 0    | .     | .     |
| 5000  | 1.10 | 1.0000 | 0.0000 | 5000 | 0   | 0    | 1.54 | 1.0000 | 1.0000 | 0.0000 | 0.0000 | 5000 | 0   | 0    | 5000 | 0    | 0    | .     | .     |
| 5000  | 1.11 | 1.0000 | 0.0000 | 5000 | 0   | 0    | 1.54 | 1.0000 | 1.0000 | 0.0000 | 0.0000 | 5000 | 0   | 0    | 5000 | 0    | 0    | .     | .     |
| 5000  | 1.12 | 1.0000 | 0.0000 | 5000 | 0   | 0    | 1.54 | 1.0000 | 1.0000 | 0.0000 | 0.0000 | 5000 | 0   | 0    | 5000 | 0    | 0    | .     | .     |
| 5000  | 1.13 | 1.0000 | 0.0000 | 5000 | 0   | 0    | 1.54 | 1.0000 | 1.0000 | 0.0000 | 0.0000 | 5000 | 0   | 0    | 5000 | 0    | 0    | .     | .     |
| 5000  | 1.14 | 1.0000 | 0.0000 | 5000 | 0   | 0    | 1.54 | 1.0000 | 1.0000 | 0.0000 | 0.0000 | 5000 | 0   | 0    | 5000 | 0    | 0    | .     | .     |
| 5000  | 1.15 | 1.0000 | 0.0000 | 5000 | 0   | 0    | 1.54 | 1.0000 | 1.0000 | 0.0000 | 0.0000 | 5000 | 0   | 0    | 5000 | 0    | 0    | .     | .     |
| 5000  | 1.16 | 1.0000 | 0.0000 | 5000 | 0   | 0    | 1.54 | 1.0000 | 1.0000 | 0.0000 | 0.0000 | 5000 | 0   | 0    | 5000 | 0    | 0    | .     | .     |
| 5000  | 1.17 | 1.0000 | 0.0000 | 5000 | 0   | 0    | 1.54 | 1.0000 | 1.0000 | 0.0000 | 0.0000 | 5000 | 0   | 0    | 5000 | 0    | 0    | .     | .     |
| 5000  | 1.18 | 1.0000 | 0.0000 | 5000 | 0   | 0    | 1.54 | 1.0000 | 1.0000 | 0.0000 | 0.0000 | 5000 | 0   | 0    | 5000 | 0    | 0    | .     | .     |
| 5000  | 1.19 | 1.0000 | 0.0000 | 5000 | 0   | 0    | 1.54 | 1.0000 | 1.0000 | 0.0000 | 0.0000 | 5000 | 0   | 0    | 5000 | 0    | 0    | .     | .     |
| 5000  | 1.20 | 1.0000 | 0.0000 | 5000 | 0   | 0    | 1.54 | 1.0000 | 1.0000 | 0.0000 | 0.0000 | 5000 | 0   | 0    | 5000 | 0    | 0    | .     | .     |
| 10000 | 0.80 | 0.0500 | 0.9500 | 25   | 760 | 9025 | 4.46 | 0.0470 | 0.0530 | 0.9470 | 0.9530 | 22   | 895 | 9082 | 28   | 1004 | 8968 | 21.24 | 60.09 |
| 10000 | 0.81 | 0.0500 | 0.9500 | 25   | 770 | 9025 | 3.98 | 0.0470 | 0.0530 | 0.9470 | 0.9530 | 22   | 895 | 9082 | 28   | 1004 | 8968 | 18.47 | 55.56 |
| 10000 | 0.82 | 0.0500 | 0.9500 | 25   | 779 | 9025 | 3.53 | 0.0470 | 0.0530 | 0.9470 | 0.9530 | 22   | 895 | 9082 | 28   | 1004 | 8968 | 15.90 | 51.21 |
| 10000 | 0.83 | 0.0500 | 0.9500 | 25   | 789 | 9025 | 3.11 | 0.0470 | 0.0530 | 0.9470 | 0.9530 | 22   | 895 | 9082 | 28   | 1004 | 8968 | 13.53 | 47.04 |
| 10000 | 0.84 | 0.0500 | 0.9500 | 25   | 798 | 9025 | 2.72 | 0.0470 | 0.0530 | 0.9470 | 0.9530 | 22   | 895 | 9082 | 28   | 1004 | 8968 | 11.36 | 43.05 |
| 10000 | 0.85 | 0.0500 | 0.9500 | 25   | 808 | 9025 | 2.36 | 0.0470 | 0.0530 | 0.9470 | 0.9530 | 22   | 895 | 9082 | 28   | 1004 | 8968 | 9.39  | 39.24 |
| 10000 | 0.86 | 0.0500 | 0.9500 | 25   | 817 | 9025 | 2.04 | 0.0470 | 0.0530 | 0.9470 | 0.9530 | 22   | 895 | 9082 | 28   | 1004 | 8968 | 7.63  | 35.60 |
| 10000 | 0.87 | 0.0500 | 0.9500 | 25   | 827 | 9025 | 1.74 | 0.0470 | 0.0530 | 0.9470 | 0.9530 | 22   | 895 | 9082 | 28   | 1004 | 8968 | 6.06  | 32.15 |
| 10000 | 0.88 | 0.0500 | 0.9500 | 25   | 836 | 9025 | 1.46 | 0.0470 | 0.0530 | 0.9470 | 0.9530 | 22   | 895 | 9082 | 28   | 1004 | 8968 | 4.70  | 28.88 |
| 10000 | 0.89 | 0.0500 | 0.9500 | 25   | 846 | 9025 | 1.22 | 0.0470 | 0.0530 | 0.9470 | 0.9530 | 22   | 895 | 9082 | 28   | 1004 | 8968 | 3.54  | 25.79 |
| 10000 | 0.90 | 0.0500 | 0.9500 | 25   | 855 | 9025 | 0.99 | 0.0470 | 0.0530 | 0.9470 | 0.9530 | 22   | 895 | 9082 | 28   | 1004 | 8968 | 2.58  | 22.87 |
| 10000 | 0.91 | 0.0500 | 0.9500 | 25   | 865 | 9025 | 0.80 | 0.0470 | 0.0530 | 0.9470 | 0.9530 | 22   | 895 | 9082 | 28   | 1004 | 8968 | 1.82  | 20.14 |



|       |      |        |        |     |      |      |       |        |        |        |        |    |      |      |     |      |      |       |       |
|-------|------|--------|--------|-----|------|------|-------|--------|--------|--------|--------|----|------|------|-----|------|------|-------|-------|
| 10000 | 0.92 | 0.0500 | 0.9500 | 25  | 874  | 9025 | 0.62  | 0.0470 | 0.0530 | 0.9470 | 0.9530 | 22 | 895  | 9082 | 28  | 1004 | 8968 | 1.27  | 17.59 |
| 10000 | 0.93 | 0.0500 | 0.9500 | 25  | 884  | 9025 | 0.47  | 0.0470 | 0.0530 | 0.9470 | 0.9530 | 22 | 895  | 9082 | 28  | 1004 | 8968 | .91   | 15.22 |
| 10000 | 0.94 | 0.0500 | 0.9500 | 25  | 893  | 9025 | 0.34  | 0.0470 | 0.0530 | 0.9470 | 0.9530 | 22 | 895  | 9082 | 28  | 1004 | 8968 | .76   | 13.02 |
| 10000 | 0.95 | 0.0500 | 0.9500 | 25  | 903  | 9025 | 0.24  | 0.0470 | 0.0530 | 0.9470 | 0.9530 | 22 | 895  | 9082 | 28  | 1004 | 8968 | .81   | 11.01 |
| 10000 | 0.96 | 0.0500 | 0.9500 | 25  | 912  | 9025 | 0.15  | 0.0470 | 0.0530 | 0.9470 | 0.9530 | 22 | 895  | 9082 | 28  | 1004 | 8968 | 1.06  | 9.17  |
| 10000 | 0.97 | 0.0500 | 0.9500 | 25  | 922  | 9025 | 0.08  | 0.0470 | 0.0530 | 0.9470 | 0.9530 | 22 | 895  | 9082 | 28  | 1004 | 8968 | 1.51  | 7.52  |
| 10000 | 0.98 | 0.0500 | 0.9500 | 25  | 931  | 9025 | 0.04  | 0.0470 | 0.0530 | 0.9470 | 0.9530 | 22 | 895  | 9082 | 28  | 1004 | 8968 | 2.16  | 6.04  |
| 10000 | 0.99 | 0.0500 | 0.9500 | 25  | 941  | 9025 | 0.01  | 0.0470 | 0.0530 | 0.9470 | 0.9530 | 22 | 895  | 9082 | 28  | 1004 | 8968 | 3.02  | 4.75  |
| 10000 | 1.00 | 0.0500 | 0.9500 | 25  | 950  | 9025 | 0.00  | 0.0470 | 0.0530 | 0.9470 | 0.9530 | 22 | 895  | 9082 | 28  | 1004 | 8968 | 4.08  | 3.63  |
| 10000 | 1.01 | 0.0500 | 0.9500 | 25  | 960  | 9025 | 0.01  | 0.0470 | 0.0530 | 0.9470 | 0.9530 | 22 | 895  | 9082 | 28  | 1004 | 8968 | 5.33  | 2.70  |
| 10000 | 1.02 | 0.0500 | 0.9500 | 25  | 969  | 9025 | 0.04  | 0.0470 | 0.0530 | 0.9470 | 0.9530 | 22 | 895  | 9082 | 28  | 1004 | 8968 | 6.79  | 1.94  |
| 10000 | 1.03 | 0.0500 | 0.9500 | 25  | 979  | 9025 | 0.08  | 0.0470 | 0.0530 | 0.9470 | 0.9530 | 22 | 895  | 9082 | 28  | 1004 | 8968 | 8.46  | 1.37  |
| 10000 | 1.04 | 0.0500 | 0.9500 | 25  | 988  | 9025 | 0.14  | 0.0470 | 0.0530 | 0.9470 | 0.9530 | 22 | 895  | 9082 | 28  | 1004 | 8968 | 10.32 | .97   |
| 10000 | 1.05 | 0.0500 | 0.9500 | 25  | 998  | 9025 | 0.22  | 0.0470 | 0.0530 | 0.9470 | 0.9530 | 22 | 895  | 9082 | 28  | 1004 | 8968 | 12.38 | .76   |
| 10000 | 1.06 | 0.0500 | 0.9500 | 25  | 1007 | 9025 | 0.31  | 0.0470 | 0.0530 | 0.9470 | 0.9530 | 22 | 895  | 9082 | 28  | 1004 | 8968 | 14.65 | .72   |
| 10000 | 1.07 | 0.0500 | 0.9500 | 25  | 1017 | 9025 | 0.42  | 0.0470 | 0.0530 | 0.9470 | 0.9530 | 22 | 895  | 9082 | 28  | 1004 | 8968 | 17.12 | .86   |
| 10000 | 1.08 | 0.0500 | 0.9500 | 25  | 1026 | 9025 | 0.54  | 0.0470 | 0.0530 | 0.9470 | 0.9530 | 22 | 895  | 9082 | 28  | 1004 | 8968 | 19.79 | 1.18  |
| 10000 | 1.09 | 0.0500 | 0.9500 | 25  | 1036 | 9025 | 0.68  | 0.0470 | 0.0530 | 0.9470 | 0.9530 | 22 | 895  | 9082 | 28  | 1004 | 8968 | 22.66 | 1.69  |
| 10000 | 1.10 | 0.0500 | 0.9500 | 25  | 1045 | 9025 | 0.83  | 0.0470 | 0.0530 | 0.9470 | 0.9530 | 22 | 895  | 9082 | 28  | 1004 | 8968 | 25.73 | 2.37  |
| 10000 | 1.11 | 0.0500 | 0.9500 | 25  | 1055 | 9025 | 1.00  | 0.0470 | 0.0530 | 0.9470 | 0.9530 | 22 | 895  | 9082 | 28  | 1004 | 8968 | 29.00 | 3.23  |
| 10000 | 1.12 | 0.0500 | 0.9500 | 25  | 1064 | 9025 | 1.18  | 0.0470 | 0.0530 | 0.9470 | 0.9530 | 22 | 895  | 9082 | 28  | 1004 | 8968 | 32.48 | 4.27  |
| 10000 | 1.13 | 0.0500 | 0.9500 | 25  | 1074 | 9025 | 1.37  | 0.0470 | 0.0530 | 0.9470 | 0.9530 | 22 | 895  | 9082 | 28  | 1004 | 8968 | 36.16 | 5.49  |
| 10000 | 1.14 | 0.0500 | 0.9500 | 25  | 1083 | 9025 | 1.58  | 0.0470 | 0.0530 | 0.9470 | 0.9530 | 22 | 895  | 9082 | 28  | 1004 | 8968 | 40.04 | 6.90  |
| 10000 | 1.15 | 0.0500 | 0.9500 | 25  | 1093 | 9025 | 1.80  | 0.0470 | 0.0530 | 0.9470 | 0.9530 | 22 | 895  | 9082 | 28  | 1004 | 8968 | 44.12 | 8.48  |
| 10000 | 1.16 | 0.0500 | 0.9500 | 25  | 1102 | 9025 | 2.03  | 0.0470 | 0.0530 | 0.9470 | 0.9530 | 22 | 895  | 9082 | 28  | 1004 | 8968 | 48.40 | 10.24 |
| 10000 | 1.17 | 0.0500 | 0.9500 | 25  | 1112 | 9025 | 2.27  | 0.0470 | 0.0530 | 0.9470 | 0.9530 | 22 | 895  | 9082 | 28  | 1004 | 8968 | 52.88 | 12.18 |
| 10000 | 1.18 | 0.0500 | 0.9500 | 25  | 1121 | 9025 | 2.53  | 0.0470 | 0.0530 | 0.9470 | 0.9530 | 22 | 895  | 9082 | 28  | 1004 | 8968 | 57.57 | 14.30 |
| 10000 | 1.19 | 0.0500 | 0.9500 | 25  | 1131 | 9025 | 2.80  | 0.0470 | 0.0530 | 0.9470 | 0.9530 | 22 | 895  | 9082 | 28  | 1004 | 8968 | 62.45 | 16.60 |
| 10000 | 1.20 | 0.0500 | 0.9500 | 25  | 1140 | 9025 | 3.08  | 0.0470 | 0.0530 | 0.9470 | 0.9530 | 22 | 895  | 9082 | 28  | 1004 | 8968 | 67.54 | 19.08 |
| 10000 | 0.80 | 0.1000 | 0.9000 | 100 | 1440 | 8100 | 15.67 | 0.0958 | 0.1042 | 0.8958 | 0.9042 | 92 | 1733 | 8175 | 108 | 1866 | 8025 | 50.99 | 98.69 |
| 10000 | 0.81 | 0.1000 | 0.9000 | 100 | 1458 | 8100 | 13.99 | 0.0958 | 0.1042 | 0.8958 | 0.9042 | 92 | 1733 | 8175 | 108 | 1866 | 8025 | 45.09 | 90.64 |
| 10000 | 0.82 | 0.1000 | 0.9000 | 100 | 1476 | 8100 | 12.42 | 0.0958 | 0.1042 | 0.8958 | 0.9042 | 92 | 1733 | 8175 | 108 | 1866 | 8025 | 39.56 | 82.94 |
| 10000 | 0.83 | 0.1000 | 0.9000 | 100 | 1494 | 8100 | 10.96 | 0.0958 | 0.1042 | 0.8958 | 0.9042 | 92 | 1733 | 8175 | 108 | 1866 | 8025 | 34.40 | 75.58 |
| 10000 | 0.84 | 0.1000 | 0.9000 | 100 | 1512 | 8100 | 9.61  | 0.0958 | 0.1042 | 0.8958 | 0.9042 | 92 | 1733 | 8175 | 108 | 1866 | 8025 | 29.62 | 68.58 |
| 10000 | 0.85 | 0.1000 | 0.9000 | 100 | 1530 | 8100 | 8.36  | 0.0958 | 0.1042 | 0.8958 | 0.9042 | 92 | 1733 | 8175 | 108 | 1866 | 8025 | 25.22 | 61.92 |

|       |      |        |        |     |      |      |       |        |        |        |        |    |      |      |     |      |      |        |       |
|-------|------|--------|--------|-----|------|------|-------|--------|--------|--------|--------|----|------|------|-----|------|------|--------|-------|
| 10000 | 0.86 | 0.1000 | 0.9000 | 100 | 1548 | 8100 | 7.21  | 0.0958 | 0.1042 | 0.8958 | 0.9042 | 92 | 1733 | 8175 | 108 | 1866 | 8025 | 21.19  | 55.61 |
| 10000 | 0.87 | 0.1000 | 0.9000 | 100 | 1566 | 8100 | 6.15  | 0.0958 | 0.1042 | 0.8958 | 0.9042 | 92 | 1733 | 8175 | 108 | 1866 | 8025 | 17.53  | 49.64 |
| 10000 | 0.88 | 0.1000 | 0.9000 | 100 | 1584 | 8100 | 5.19  | 0.0958 | 0.1042 | 0.8958 | 0.9042 | 92 | 1733 | 8175 | 108 | 1866 | 8025 | 14.24  | 44.03 |
| 10000 | 0.89 | 0.1000 | 0.9000 | 100 | 1602 | 8100 | 4.32  | 0.0958 | 0.1042 | 0.8958 | 0.9042 | 92 | 1733 | 8175 | 108 | 1866 | 8025 | 11.33  | 38.76 |
| 10000 | 0.90 | 0.1000 | 0.9000 | 100 | 1620 | 8100 | 3.54  | 0.0958 | 0.1042 | 0.8958 | 0.9042 | 92 | 1733 | 8175 | 108 | 1866 | 8025 | 8.79   | 33.83 |
| 10000 | 0.91 | 0.1000 | 0.9000 | 100 | 1638 | 8100 | 2.84  | 0.0958 | 0.1042 | 0.8958 | 0.9042 | 92 | 1733 | 8175 | 108 | 1866 | 8025 | 6.63   | 29.26 |
| 10000 | 0.92 | 0.1000 | 0.9000 | 100 | 1656 | 8100 | 2.22  | 0.0958 | 0.1042 | 0.8958 | 0.9042 | 92 | 1733 | 8175 | 108 | 1866 | 8025 | 4.84   | 25.03 |
| 10000 | 0.93 | 0.1000 | 0.9000 | 100 | 1674 | 8100 | 1.69  | 0.0958 | 0.1042 | 0.8958 | 0.9042 | 92 | 1733 | 8175 | 108 | 1866 | 8025 | 3.43   | 21.15 |
| 10000 | 0.94 | 0.1000 | 0.9000 | 100 | 1692 | 8100 | 1.23  | 0.0958 | 0.1042 | 0.8958 | 0.9042 | 92 | 1733 | 8175 | 108 | 1866 | 8025 | 2.39   | 17.62 |
| 10000 | 0.95 | 0.1000 | 0.9000 | 100 | 1710 | 8100 | 0.85  | 0.0958 | 0.1042 | 0.8958 | 0.9042 | 92 | 1733 | 8175 | 108 | 1866 | 8025 | 1.72   | 14.43 |
| 10000 | 0.96 | 0.1000 | 0.9000 | 100 | 1728 | 8100 | 0.54  | 0.0958 | 0.1042 | 0.8958 | 0.9042 | 92 | 1733 | 8175 | 108 | 1866 | 8025 | 1.43   | 11.59 |
| 10000 | 0.97 | 0.1000 | 0.9000 | 100 | 1746 | 8100 | 0.30  | 0.0958 | 0.1042 | 0.8958 | 0.9042 | 92 | 1733 | 8175 | 108 | 1866 | 8025 | 1.51   | 9.10  |
| 10000 | 0.98 | 0.1000 | 0.9000 | 100 | 1764 | 8100 | 0.13  | 0.0958 | 0.1042 | 0.8958 | 0.9042 | 92 | 1733 | 8175 | 108 | 1866 | 8025 | 1.96   | 6.95  |
| 10000 | 0.99 | 0.1000 | 0.9000 | 100 | 1782 | 8100 | 0.03  | 0.0958 | 0.1042 | 0.8958 | 0.9042 | 92 | 1733 | 8175 | 108 | 1866 | 8025 | 2.79   | 5.16  |
| 10000 | 1.00 | 0.1000 | 0.9000 | 100 | 1800 | 8100 | 0.00  | 0.0958 | 0.1042 | 0.8958 | 0.9042 | 92 | 1733 | 8175 | 108 | 1866 | 8025 | 3.99   | 3.71  |
| 10000 | 1.01 | 0.1000 | 0.9000 | 100 | 1818 | 8100 | 0.03  | 0.0958 | 0.1042 | 0.8958 | 0.9042 | 92 | 1733 | 8175 | 108 | 1866 | 8025 | 5.57   | 2.60  |
| 10000 | 1.02 | 0.1000 | 0.9000 | 100 | 1836 | 8100 | 0.13  | 0.0958 | 0.1042 | 0.8958 | 0.9042 | 92 | 1733 | 8175 | 108 | 1866 | 8025 | 7.52   | 1.85  |
| 10000 | 1.03 | 0.1000 | 0.9000 | 100 | 1854 | 8100 | 0.28  | 0.0958 | 0.1042 | 0.8958 | 0.9042 | 92 | 1733 | 8175 | 108 | 1866 | 8025 | 9.84   | 1.44  |
| 10000 | 1.04 | 0.1000 | 0.9000 | 100 | 1872 | 8100 | 0.50  | 0.0958 | 0.1042 | 0.8958 | 0.9042 | 92 | 1733 | 8175 | 108 | 1866 | 8025 | 12.54  | 1.38  |
| 10000 | 1.05 | 0.1000 | 0.9000 | 100 | 1890 | 8100 | 0.78  | 0.0958 | 0.1042 | 0.8958 | 0.9042 | 92 | 1733 | 8175 | 108 | 1866 | 8025 | 15.61  | 1.66  |
| 10000 | 1.06 | 0.1000 | 0.9000 | 100 | 1908 | 8100 | 1.11  | 0.0958 | 0.1042 | 0.8958 | 0.9042 | 92 | 1733 | 8175 | 108 | 1866 | 8025 | 19.05  | 2.30  |
| 10000 | 1.07 | 0.1000 | 0.9000 | 100 | 1926 | 8100 | 1.50  | 0.0958 | 0.1042 | 0.8958 | 0.9042 | 92 | 1733 | 8175 | 108 | 1866 | 8025 | 22.87  | 3.28  |
| 10000 | 1.08 | 0.1000 | 0.9000 | 100 | 1944 | 8100 | 1.95  | 0.0958 | 0.1042 | 0.8958 | 0.9042 | 92 | 1733 | 8175 | 108 | 1866 | 8025 | 27.07  | 4.60  |
| 10000 | 1.09 | 0.1000 | 0.9000 | 100 | 1962 | 8100 | 2.45  | 0.0958 | 0.1042 | 0.8958 | 0.9042 | 92 | 1733 | 8175 | 108 | 1866 | 8025 | 31.63  | 6.28  |
| 10000 | 1.10 | 0.1000 | 0.9000 | 100 | 1980 | 8100 | 3.00  | 0.0958 | 0.1042 | 0.8958 | 0.9042 | 92 | 1733 | 8175 | 108 | 1866 | 8025 | 36.57  | 8.30  |
| 10000 | 1.11 | 0.1000 | 0.9000 | 100 | 1998 | 8100 | 3.60  | 0.0958 | 0.1042 | 0.8958 | 0.9042 | 92 | 1733 | 8175 | 108 | 1866 | 8025 | 41.89  | 10.67 |
| 10000 | 1.12 | 0.1000 | 0.9000 | 100 | 2016 | 8100 | 4.26  | 0.0958 | 0.1042 | 0.8958 | 0.9042 | 92 | 1733 | 8175 | 108 | 1866 | 8025 | 47.58  | 13.39 |
| 10000 | 1.13 | 0.1000 | 0.9000 | 100 | 2034 | 8100 | 4.96  | 0.0958 | 0.1042 | 0.8958 | 0.9042 | 92 | 1733 | 8175 | 108 | 1866 | 8025 | 53.64  | 16.45 |
| 10000 | 1.14 | 0.1000 | 0.9000 | 100 | 2052 | 8100 | 5.72  | 0.0958 | 0.1042 | 0.8958 | 0.9042 | 92 | 1733 | 8175 | 108 | 1866 | 8025 | 60.08  | 19.86 |
| 10000 | 1.15 | 0.1000 | 0.9000 | 100 | 2070 | 8100 | 6.52  | 0.0958 | 0.1042 | 0.8958 | 0.9042 | 92 | 1733 | 8175 | 108 | 1866 | 8025 | 66.89  | 23.62 |
| 10000 | 1.16 | 0.1000 | 0.9000 | 100 | 2088 | 8100 | 7.37  | 0.0958 | 0.1042 | 0.8958 | 0.9042 | 92 | 1733 | 8175 | 108 | 1866 | 8025 | 74.07  | 27.73 |
| 10000 | 1.17 | 0.1000 | 0.9000 | 100 | 2106 | 8100 | 8.26  | 0.0958 | 0.1042 | 0.8958 | 0.9042 | 92 | 1733 | 8175 | 108 | 1866 | 8025 | 81.63  | 32.18 |
| 10000 | 1.18 | 0.1000 | 0.9000 | 100 | 2124 | 8100 | 9.20  | 0.0958 | 0.1042 | 0.8958 | 0.9042 | 92 | 1733 | 8175 | 108 | 1866 | 8025 | 89.56  | 36.98 |
| 10000 | 1.19 | 0.1000 | 0.9000 | 100 | 2142 | 8100 | 10.19 | 0.0958 | 0.1042 | 0.8958 | 0.9042 | 92 | 1733 | 8175 | 108 | 1866 | 8025 | 97.87  | 42.13 |
| 10000 | 1.20 | 0.1000 | 0.9000 | 100 | 2160 | 8100 | 11.21 | 0.0958 | 0.1042 | 0.8958 | 0.9042 | 92 | 1733 | 8175 | 108 | 1866 | 8025 | 106.55 | 47.62 |

|       |      |        |        |     |      |      |       |        |        |        |        |     |      |      |     |      |      |       |        |
|-------|------|--------|--------|-----|------|------|-------|--------|--------|--------|--------|-----|------|------|-----|------|------|-------|--------|
| 10000 | 0.80 | 0.1500 | 0.8500 | 225 | 2040 | 7225 | 30.85 | 0.1451 | 0.1549 | 0.8451 | 0.8549 | 210 | 2480 | 7309 | 240 | 2619 | 7141 | 80.13 | 129.86 |
| 10000 | 0.81 | 0.1500 | 0.8500 | 225 | 2066 | 7225 | 27.57 | 0.1451 | 0.1549 | 0.8451 | 0.8549 | 210 | 2480 | 7309 | 240 | 2619 | 7141 | 71.34 | 118.83 |
| 10000 | 0.82 | 0.1500 | 0.8500 | 225 | 2091 | 7225 | 24.51 | 0.1451 | 0.1549 | 0.8451 | 0.8549 | 210 | 2480 | 7309 | 240 | 2619 | 7141 | 63.07 | 108.31 |
| 10000 | 0.83 | 0.1500 | 0.8500 | 225 | 2117 | 7225 | 21.66 | 0.1451 | 0.1549 | 0.8451 | 0.8549 | 210 | 2480 | 7309 | 240 | 2619 | 7141 | 55.33 | 98.28  |
| 10000 | 0.84 | 0.1500 | 0.8500 | 225 | 2142 | 7225 | 19.01 | 0.1451 | 0.1549 | 0.8451 | 0.8549 | 210 | 2480 | 7309 | 240 | 2619 | 7141 | 48.11 | 88.74  |
| 10000 | 0.85 | 0.1500 | 0.8500 | 225 | 2168 | 7225 | 16.55 | 0.1451 | 0.1549 | 0.8451 | 0.8549 | 210 | 2480 | 7309 | 240 | 2619 | 7141 | 41.42 | 79.70  |
| 10000 | 0.86 | 0.1500 | 0.8500 | 225 | 2193 | 7225 | 14.29 | 0.1451 | 0.1549 | 0.8451 | 0.8549 | 210 | 2480 | 7309 | 240 | 2619 | 7141 | 35.25 | 71.16  |
| 10000 | 0.87 | 0.1500 | 0.8500 | 225 | 2219 | 7225 | 12.21 | 0.1451 | 0.1549 | 0.8451 | 0.8549 | 210 | 2480 | 7309 | 240 | 2619 | 7141 | 29.61 | 63.12  |
| 10000 | 0.88 | 0.1500 | 0.8500 | 225 | 2244 | 7225 | 10.31 | 0.1451 | 0.1549 | 0.8451 | 0.8549 | 210 | 2480 | 7309 | 240 | 2619 | 7141 | 24.49 | 55.57  |
| 10000 | 0.89 | 0.1500 | 0.8500 | 225 | 2270 | 7225 | 8.59  | 0.1451 | 0.1549 | 0.8451 | 0.8549 | 210 | 2480 | 7309 | 240 | 2619 | 7141 | 19.89 | 48.52  |
| 10000 | 0.90 | 0.1500 | 0.8500 | 225 | 2295 | 7225 | 7.04  | 0.1451 | 0.1549 | 0.8451 | 0.8549 | 210 | 2480 | 7309 | 240 | 2619 | 7141 | 15.82 | 41.97  |
| 10000 | 0.91 | 0.1500 | 0.8500 | 225 | 2321 | 7225 | 5.65  | 0.1451 | 0.1549 | 0.8451 | 0.8549 | 210 | 2480 | 7309 | 240 | 2619 | 7141 | 12.27 | 35.91  |
| 10000 | 0.92 | 0.1500 | 0.8500 | 225 | 2346 | 7225 | 4.43  | 0.1451 | 0.1549 | 0.8451 | 0.8549 | 210 | 2480 | 7309 | 240 | 2619 | 7141 | 9.25  | 30.35  |
| 10000 | 0.93 | 0.1500 | 0.8500 | 225 | 2372 | 7225 | 3.36  | 0.1451 | 0.1549 | 0.8451 | 0.8549 | 210 | 2480 | 7309 | 240 | 2619 | 7141 | 6.75  | 25.29  |
| 10000 | 0.94 | 0.1500 | 0.8500 | 225 | 2397 | 7225 | 2.45  | 0.1451 | 0.1549 | 0.8451 | 0.8549 | 210 | 2480 | 7309 | 240 | 2619 | 7141 | 4.78  | 20.72  |
| 10000 | 0.95 | 0.1500 | 0.8500 | 225 | 2423 | 7225 | 1.69  | 0.1451 | 0.1549 | 0.8451 | 0.8549 | 210 | 2480 | 7309 | 240 | 2619 | 7141 | 3.33  | 16.65  |
| 10000 | 0.96 | 0.1500 | 0.8500 | 225 | 2448 | 7225 | 1.07  | 0.1451 | 0.1549 | 0.8451 | 0.8549 | 210 | 2480 | 7309 | 240 | 2619 | 7141 | 2.41  | 13.07  |
| 10000 | 0.97 | 0.1500 | 0.8500 | 225 | 2474 | 7225 | 0.60  | 0.1451 | 0.1549 | 0.8451 | 0.8549 | 210 | 2480 | 7309 | 240 | 2619 | 7141 | 2.01  | 9.99   |
| 10000 | 0.98 | 0.1500 | 0.8500 | 225 | 2499 | 7225 | 0.26  | 0.1451 | 0.1549 | 0.8451 | 0.8549 | 210 | 2480 | 7309 | 240 | 2619 | 7141 | 2.13  | 7.41   |
| 10000 | 0.99 | 0.1500 | 0.8500 | 225 | 2525 | 7225 | 0.07  | 0.1451 | 0.1549 | 0.8451 | 0.8549 | 210 | 2480 | 7309 | 240 | 2619 | 7141 | 2.78  | 5.33   |
| 10000 | 1.00 | 0.1500 | 0.8500 | 225 | 2550 | 7225 | 0.00  | 0.1451 | 0.1549 | 0.8451 | 0.8549 | 210 | 2480 | 7309 | 240 | 2619 | 7141 | 3.95  | 3.74   |
| 10000 | 1.01 | 0.1500 | 0.8500 | 225 | 2576 | 7225 | 0.06  | 0.1451 | 0.1549 | 0.8451 | 0.8549 | 210 | 2480 | 7309 | 240 | 2619 | 7141 | 5.65  | 2.65   |
| 10000 | 1.02 | 0.1500 | 0.8500 | 225 | 2601 | 7225 | 0.26  | 0.1451 | 0.1549 | 0.8451 | 0.8549 | 210 | 2480 | 7309 | 240 | 2619 | 7141 | 7.87  | 2.05   |
| 10000 | 1.03 | 0.1500 | 0.8500 | 225 | 2627 | 7225 | 0.57  | 0.1451 | 0.1549 | 0.8451 | 0.8549 | 210 | 2480 | 7309 | 240 | 2619 | 7141 | 10.61 | 1.96   |
| 10000 | 1.04 | 0.1500 | 0.8500 | 225 | 2652 | 7225 | 1.01  | 0.1451 | 0.1549 | 0.8451 | 0.8549 | 210 | 2480 | 7309 | 240 | 2619 | 7141 | 13.88 | 2.36   |
| 10000 | 1.05 | 0.1500 | 0.8500 | 225 | 2678 | 7225 | 1.57  | 0.1451 | 0.1549 | 0.8451 | 0.8549 | 210 | 2480 | 7309 | 240 | 2619 | 7141 | 17.68 | 3.25   |
| 10000 | 1.06 | 0.1500 | 0.8500 | 225 | 2703 | 7225 | 2.24  | 0.1451 | 0.1549 | 0.8451 | 0.8549 | 210 | 2480 | 7309 | 240 | 2619 | 7141 | 22.00 | 4.64   |
| 10000 | 1.07 | 0.1500 | 0.8500 | 225 | 2729 | 7225 | 3.03  | 0.1451 | 0.1549 | 0.8451 | 0.8549 | 210 | 2480 | 7309 | 240 | 2619 | 7141 | 26.84 | 6.53   |
| 10000 | 1.08 | 0.1500 | 0.8500 | 225 | 2754 | 7225 | 3.93  | 0.1451 | 0.1549 | 0.8451 | 0.8549 | 210 | 2480 | 7309 | 240 | 2619 | 7141 | 32.21 | 8.91   |
| 10000 | 1.09 | 0.1500 | 0.8500 | 225 | 2780 | 7225 | 4.94  | 0.1451 | 0.1549 | 0.8451 | 0.8549 | 210 | 2480 | 7309 | 240 | 2619 | 7141 | 38.10 | 11.80  |
| 10000 | 1.10 | 0.1500 | 0.8500 | 225 | 2805 | 7225 | 6.06  | 0.1451 | 0.1549 | 0.8451 | 0.8549 | 210 | 2480 | 7309 | 240 | 2619 | 7141 | 44.51 | 15.17  |
| 10000 | 1.11 | 0.1500 | 0.8500 | 225 | 2831 | 7225 | 7.29  | 0.1451 | 0.1549 | 0.8451 | 0.8549 | 210 | 2480 | 7309 | 240 | 2619 | 7141 | 51.45 | 19.05  |
| 10000 | 1.12 | 0.1500 | 0.8500 | 225 | 2856 | 7225 | 8.62  | 0.1451 | 0.1549 | 0.8451 | 0.8549 | 210 | 2480 | 7309 | 240 | 2619 | 7141 | 58.92 | 23.42  |
| 10000 | 1.13 | 0.1500 | 0.8500 | 225 | 2882 | 7225 | 10.05 | 0.1451 | 0.1549 | 0.8451 | 0.8549 | 210 | 2480 | 7309 | 240 | 2619 | 7141 | 66.91 | 28.29  |
| 10000 | 1.14 | 0.1500 | 0.8500 | 225 | 2907 | 7225 | 11.58 | 0.1451 | 0.1549 | 0.8451 | 0.8549 | 210 | 2480 | 7309 | 240 | 2619 | 7141 | 75.42 | 33.65  |

|       |      |        |        |     |      |      |       |        |        |        |        |     |      |      |     |      |      |        |        |
|-------|------|--------|--------|-----|------|------|-------|--------|--------|--------|--------|-----|------|------|-----|------|------|--------|--------|
| 10000 | 1.15 | 0.1500 | 0.8500 | 225 | 2933 | 7225 | 13.21 | 0.1451 | 0.1549 | 0.8451 | 0.8549 | 210 | 2480 | 7309 | 240 | 2619 | 7141 | 84.46  | 39.51  |
| 10000 | 1.16 | 0.1500 | 0.8500 | 225 | 2958 | 7225 | 14.93 | 0.1451 | 0.1549 | 0.8451 | 0.8549 | 210 | 2480 | 7309 | 240 | 2619 | 7141 | 94.02  | 45.87  |
| 10000 | 1.17 | 0.1500 | 0.8500 | 225 | 2984 | 7225 | 16.76 | 0.1451 | 0.1549 | 0.8451 | 0.8549 | 210 | 2480 | 7309 | 240 | 2619 | 7141 | 104.11 | 52.73  |
| 10000 | 1.18 | 0.1500 | 0.8500 | 225 | 3009 | 7225 | 18.67 | 0.1451 | 0.1549 | 0.8451 | 0.8549 | 210 | 2480 | 7309 | 240 | 2619 | 7141 | 114.72 | 60.08  |
| 10000 | 1.19 | 0.1500 | 0.8500 | 225 | 3035 | 7225 | 20.68 | 0.1451 | 0.1549 | 0.8451 | 0.8549 | 210 | 2480 | 7309 | 240 | 2619 | 7141 | 125.85 | 67.92  |
| 10000 | 1.20 | 0.1500 | 0.8500 | 225 | 3060 | 7225 | 22.78 | 0.1451 | 0.1549 | 0.8451 | 0.8549 | 210 | 2480 | 7309 | 240 | 2619 | 7141 | 137.51 | 76.27  |
| 10000 | 0.80 | 0.2000 | 0.8000 | 400 | 2560 | 6400 | 47.76 | 0.1945 | 0.2055 | 0.7945 | 0.8055 | 378 | 3133 | 6489 | 422 | 3266 | 6312 | 107.24 | 155.01 |
| 10000 | 0.81 | 0.2000 | 0.8000 | 400 | 2592 | 6400 | 42.73 | 0.1945 | 0.2055 | 0.7945 | 0.8055 | 378 | 3133 | 6489 | 422 | 3266 | 6312 | 95.86  | 141.49 |
| 10000 | 0.82 | 0.2000 | 0.8000 | 400 | 2624 | 6400 | 38.02 | 0.1945 | 0.2055 | 0.7945 | 0.8055 | 378 | 3133 | 6489 | 422 | 3266 | 6312 | 85.14  | 128.60 |
| 10000 | 0.83 | 0.2000 | 0.8000 | 400 | 2656 | 6400 | 33.63 | 0.1945 | 0.2055 | 0.7945 | 0.8055 | 378 | 3133 | 6489 | 422 | 3266 | 6312 | 75.07  | 116.34 |
| 10000 | 0.84 | 0.2000 | 0.8000 | 400 | 2688 | 6400 | 29.55 | 0.1945 | 0.2055 | 0.7945 | 0.8055 | 378 | 3133 | 6489 | 422 | 3266 | 6312 | 65.65  | 104.70 |
| 10000 | 0.85 | 0.2000 | 0.8000 | 400 | 2720 | 6400 | 25.76 | 0.1945 | 0.2055 | 0.7945 | 0.8055 | 378 | 3133 | 6489 | 422 | 3266 | 6312 | 56.89  | 93.69  |
| 10000 | 0.86 | 0.2000 | 0.8000 | 400 | 2752 | 6400 | 22.26 | 0.1945 | 0.2055 | 0.7945 | 0.8055 | 378 | 3133 | 6489 | 422 | 3266 | 6312 | 48.79  | 83.30  |
| 10000 | 0.87 | 0.2000 | 0.8000 | 400 | 2784 | 6400 | 19.04 | 0.1945 | 0.2055 | 0.7945 | 0.8055 | 378 | 3133 | 6489 | 422 | 3266 | 6312 | 41.33  | 73.54  |
| 10000 | 0.88 | 0.2000 | 0.8000 | 400 | 2816 | 6400 | 16.09 | 0.1945 | 0.2055 | 0.7945 | 0.8055 | 378 | 3133 | 6489 | 422 | 3266 | 6312 | 34.53  | 64.41  |
| 10000 | 0.89 | 0.2000 | 0.8000 | 400 | 2848 | 6400 | 13.42 | 0.1945 | 0.2055 | 0.7945 | 0.8055 | 378 | 3133 | 6489 | 422 | 3266 | 6312 | 28.39  | 55.91  |
| 10000 | 0.90 | 0.2000 | 0.8000 | 400 | 2880 | 6400 | 11.01 | 0.1945 | 0.2055 | 0.7945 | 0.8055 | 378 | 3133 | 6489 | 422 | 3266 | 6312 | 22.89  | 48.03  |
| 10000 | 0.91 | 0.2000 | 0.8000 | 400 | 2912 | 6400 | 8.85  | 0.1945 | 0.2055 | 0.7945 | 0.8055 | 378 | 3133 | 6489 | 422 | 3266 | 6312 | 18.06  | 40.79  |
| 10000 | 0.92 | 0.2000 | 0.8000 | 400 | 2944 | 6400 | 6.94  | 0.1945 | 0.2055 | 0.7945 | 0.8055 | 378 | 3133 | 6489 | 422 | 3266 | 6312 | 13.87  | 34.16  |
| 10000 | 0.93 | 0.2000 | 0.8000 | 400 | 2976 | 6400 | 5.27  | 0.1945 | 0.2055 | 0.7945 | 0.8055 | 378 | 3133 | 6489 | 422 | 3266 | 6312 | 10.34  | 28.17  |
| 10000 | 0.94 | 0.2000 | 0.8000 | 400 | 3008 | 6400 | 3.85  | 0.1945 | 0.2055 | 0.7945 | 0.8055 | 378 | 3133 | 6489 | 422 | 3266 | 6312 | 7.46   | 22.80  |
| 10000 | 0.95 | 0.2000 | 0.8000 | 400 | 3040 | 6400 | 2.65  | 0.1945 | 0.2055 | 0.7945 | 0.8055 | 378 | 3133 | 6489 | 422 | 3266 | 6312 | 5.24   | 18.06  |
| 10000 | 0.96 | 0.2000 | 0.8000 | 400 | 3072 | 6400 | 1.68  | 0.1945 | 0.2055 | 0.7945 | 0.8055 | 378 | 3133 | 6489 | 422 | 3266 | 6312 | 3.67   | 13.95  |
| 10000 | 0.97 | 0.2000 | 0.8000 | 400 | 3104 | 6400 | 0.94  | 0.1945 | 0.2055 | 0.7945 | 0.8055 | 378 | 3133 | 6489 | 422 | 3266 | 6312 | 2.75   | 10.46  |
| 10000 | 0.98 | 0.2000 | 0.8000 | 400 | 3136 | 6400 | 0.42  | 0.1945 | 0.2055 | 0.7945 | 0.8055 | 378 | 3133 | 6489 | 422 | 3266 | 6312 | 2.49   | 7.60   |
| 10000 | 0.99 | 0.2000 | 0.8000 | 400 | 3168 | 6400 | 0.10  | 0.1945 | 0.2055 | 0.7945 | 0.8055 | 378 | 3133 | 6489 | 422 | 3266 | 6312 | 2.88   | 5.37   |
| 10000 | 1.00 | 0.2000 | 0.8000 | 400 | 3200 | 6400 | 0.00  | 0.1945 | 0.2055 | 0.7945 | 0.8055 | 378 | 3133 | 6489 | 422 | 3266 | 6312 | 3.92   | 3.76   |
| 10000 | 1.01 | 0.2000 | 0.8000 | 400 | 3232 | 6400 | 0.10  | 0.1945 | 0.2055 | 0.7945 | 0.8055 | 378 | 3133 | 6489 | 422 | 3266 | 6312 | 5.62   | 2.79   |
| 10000 | 1.02 | 0.2000 | 0.8000 | 400 | 3264 | 6400 | 0.40  | 0.1945 | 0.2055 | 0.7945 | 0.8055 | 378 | 3133 | 6489 | 422 | 3266 | 6312 | 7.97   | 2.44   |
| 10000 | 1.03 | 0.2000 | 0.8000 | 400 | 3296 | 6400 | 0.90  | 0.1945 | 0.2055 | 0.7945 | 0.8055 | 378 | 3133 | 6489 | 422 | 3266 | 6312 | 10.98  | 2.71   |
| 10000 | 1.04 | 0.2000 | 0.8000 | 400 | 3328 | 6400 | 1.60  | 0.1945 | 0.2055 | 0.7945 | 0.8055 | 378 | 3133 | 6489 | 422 | 3266 | 6312 | 14.64  | 3.61   |
| 10000 | 1.05 | 0.2000 | 0.8000 | 400 | 3360 | 6400 | 2.48  | 0.1945 | 0.2055 | 0.7945 | 0.8055 | 378 | 3133 | 6489 | 422 | 3266 | 6312 | 18.95  | 5.14   |
| 10000 | 1.06 | 0.2000 | 0.8000 | 400 | 3392 | 6400 | 3.54  | 0.1945 | 0.2055 | 0.7945 | 0.8055 | 378 | 3133 | 6489 | 422 | 3266 | 6312 | 23.92  | 7.30   |
| 10000 | 1.07 | 0.2000 | 0.8000 | 400 | 3424 | 6400 | 4.79  | 0.1945 | 0.2055 | 0.7945 | 0.8055 | 378 | 3133 | 6489 | 422 | 3266 | 6312 | 29.54  | 10.09  |
| 10000 | 1.08 | 0.2000 | 0.8000 | 400 | 3456 | 6400 | 6.22  | 0.1945 | 0.2055 | 0.7945 | 0.8055 | 378 | 3133 | 6489 | 422 | 3266 | 6312 | 35.82  | 13.50  |

|       |      |        |        |     |      |      |       |        |        |        |        |     |      |      |     |      |      |        |        |
|-------|------|--------|--------|-----|------|------|-------|--------|--------|--------|--------|-----|------|------|-----|------|------|--------|--------|
| 10000 | 1.09 | 0.2000 | 0.8000 | 400 | 3488 | 6400 | 7.82  | 0.1945 | 0.2055 | 0.7945 | 0.8055 | 378 | 3133 | 6489 | 422 | 3266 | 6312 | 42.74  | 17.54  |
| 10000 | 1.10 | 0.2000 | 0.8000 | 400 | 3520 | 6400 | 9.60  | 0.1945 | 0.2055 | 0.7945 | 0.8055 | 378 | 3133 | 6489 | 422 | 3266 | 6312 | 50.33  | 22.20  |
| 10000 | 1.11 | 0.2000 | 0.8000 | 400 | 3552 | 6400 | 11.55 | 0.1945 | 0.2055 | 0.7945 | 0.8055 | 378 | 3133 | 6489 | 422 | 3266 | 6312 | 58.56  | 27.50  |
| 10000 | 1.12 | 0.2000 | 0.8000 | 400 | 3584 | 6400 | 13.66 | 0.1945 | 0.2055 | 0.7945 | 0.8055 | 378 | 3133 | 6489 | 422 | 3266 | 6312 | 67.45  | 33.42  |
| 10000 | 1.13 | 0.2000 | 0.8000 | 400 | 3616 | 6400 | 15.94 | 0.1945 | 0.2055 | 0.7945 | 0.8055 | 378 | 3133 | 6489 | 422 | 3266 | 6312 | 76.99  | 39.96  |
| 10000 | 1.14 | 0.2000 | 0.8000 | 400 | 3648 | 6400 | 18.37 | 0.1945 | 0.2055 | 0.7945 | 0.8055 | 378 | 3133 | 6489 | 422 | 3266 | 6312 | 87.19  | 47.14  |
| 10000 | 1.15 | 0.2000 | 0.8000 | 400 | 3680 | 6400 | 20.97 | 0.1945 | 0.2055 | 0.7945 | 0.8055 | 378 | 3133 | 6489 | 422 | 3266 | 6312 | 98.04  | 54.94  |
| 10000 | 1.16 | 0.2000 | 0.8000 | 400 | 3712 | 6400 | 23.72 | 0.1945 | 0.2055 | 0.7945 | 0.8055 | 378 | 3133 | 6489 | 422 | 3266 | 6312 | 109.54 | 63.37  |
| 10000 | 1.17 | 0.2000 | 0.8000 | 400 | 3744 | 6400 | 26.62 | 0.1945 | 0.2055 | 0.7945 | 0.8055 | 378 | 3133 | 6489 | 422 | 3266 | 6312 | 121.70 | 72.42  |
| 10000 | 1.18 | 0.2000 | 0.8000 | 400 | 3776 | 6400 | 29.68 | 0.1945 | 0.2055 | 0.7945 | 0.8055 | 378 | 3133 | 6489 | 422 | 3266 | 6312 | 134.51 | 82.10  |
| 10000 | 1.19 | 0.2000 | 0.8000 | 400 | 3808 | 6400 | 32.88 | 0.1945 | 0.2055 | 0.7945 | 0.8055 | 378 | 3133 | 6489 | 422 | 3266 | 6312 | 147.98 | 92.41  |
| 10000 | 1.20 | 0.2000 | 0.8000 | 400 | 3840 | 6400 | 36.23 | 0.1945 | 0.2055 | 0.7945 | 0.8055 | 378 | 3133 | 6489 | 422 | 3266 | 6312 | 162.10 | 103.35 |
| 10000 | 0.80 | 0.2500 | 0.7500 | 625 | 3000 | 5625 | 64.63 | 0.2440 | 0.2560 | 0.7440 | 0.7560 | 595 | 3689 | 5715 | 655 | 3809 | 5535 | 131.68 | 174.80 |
| 10000 | 0.81 | 0.2500 | 0.7500 | 625 | 3038 | 5625 | 57.89 | 0.2440 | 0.2560 | 0.7440 | 0.7560 | 595 | 3689 | 5715 | 655 | 3809 | 5535 | 118.05 | 159.23 |
| 10000 | 0.82 | 0.2500 | 0.7500 | 625 | 3075 | 5625 | 51.56 | 0.2440 | 0.2560 | 0.7440 | 0.7560 | 595 | 3689 | 5715 | 655 | 3809 | 5535 | 105.18 | 144.40 |
| 10000 | 0.83 | 0.2500 | 0.7500 | 625 | 3113 | 5625 | 45.64 | 0.2440 | 0.2560 | 0.7440 | 0.7560 | 595 | 3689 | 5715 | 655 | 3809 | 5535 | 93.08  | 130.32 |
| 10000 | 0.84 | 0.2500 | 0.7500 | 625 | 3150 | 5625 | 40.13 | 0.2440 | 0.2560 | 0.7440 | 0.7560 | 595 | 3689 | 5715 | 655 | 3809 | 5535 | 81.73  | 116.97 |
| 10000 | 0.85 | 0.2500 | 0.7500 | 625 | 3188 | 5625 | 35.01 | 0.2440 | 0.2560 | 0.7440 | 0.7560 | 595 | 3689 | 5715 | 655 | 3809 | 5535 | 71.15  | 104.35 |
| 10000 | 0.86 | 0.2500 | 0.7500 | 625 | 3225 | 5625 | 30.28 | 0.2440 | 0.2560 | 0.7440 | 0.7560 | 595 | 3689 | 5715 | 655 | 3809 | 5535 | 61.33  | 92.48  |
| 10000 | 0.87 | 0.2500 | 0.7500 | 625 | 3263 | 5625 | 25.92 | 0.2440 | 0.2560 | 0.7440 | 0.7560 | 595 | 3689 | 5715 | 655 | 3809 | 5535 | 52.27  | 81.35  |
| 10000 | 0.88 | 0.2500 | 0.7500 | 625 | 3300 | 5625 | 21.93 | 0.2440 | 0.2560 | 0.7440 | 0.7560 | 595 | 3689 | 5715 | 655 | 3809 | 5535 | 43.98  | 70.95  |
| 10000 | 0.89 | 0.2500 | 0.7500 | 625 | 3338 | 5625 | 18.30 | 0.2440 | 0.2560 | 0.7440 | 0.7560 | 595 | 3689 | 5715 | 655 | 3809 | 5535 | 36.45  | 61.29  |
| 10000 | 0.90 | 0.2500 | 0.7500 | 625 | 3375 | 5625 | 15.02 | 0.2440 | 0.2560 | 0.7440 | 0.7560 | 595 | 3689 | 5715 | 655 | 3809 | 5535 | 29.68  | 52.37  |
| 10000 | 0.91 | 0.2500 | 0.7500 | 625 | 3413 | 5625 | 12.08 | 0.2440 | 0.2560 | 0.7440 | 0.7560 | 595 | 3689 | 5715 | 655 | 3809 | 5535 | 23.67  | 44.19  |
| 10000 | 0.92 | 0.2500 | 0.7500 | 625 | 3450 | 5625 | 9.48  | 0.2440 | 0.2560 | 0.7440 | 0.7560 | 595 | 3689 | 5715 | 655 | 3809 | 5535 | 18.42  | 36.75  |
| 10000 | 0.93 | 0.2500 | 0.7500 | 625 | 3488 | 5625 | 7.21  | 0.2440 | 0.2560 | 0.7440 | 0.7560 | 595 | 3689 | 5715 | 655 | 3809 | 5535 | 13.94  | 30.04  |
| 10000 | 0.94 | 0.2500 | 0.7500 | 625 | 3525 | 5625 | 5.26  | 0.2440 | 0.2560 | 0.7440 | 0.7560 | 595 | 3689 | 5715 | 655 | 3809 | 5535 | 10.22  | 24.08  |
| 10000 | 0.95 | 0.2500 | 0.7500 | 625 | 3563 | 5625 | 3.63  | 0.2440 | 0.2560 | 0.7440 | 0.7560 | 595 | 3689 | 5715 | 655 | 3809 | 5535 | 7.26   | 18.85  |
| 10000 | 0.96 | 0.2500 | 0.7500 | 625 | 3600 | 5625 | 2.31  | 0.2440 | 0.2560 | 0.7440 | 0.7560 | 595 | 3689 | 5715 | 655 | 3809 | 5535 | 5.07   | 14.36  |
| 10000 | 0.97 | 0.2500 | 0.7500 | 625 | 3638 | 5625 | 1.29  | 0.2440 | 0.2560 | 0.7440 | 0.7560 | 595 | 3689 | 5715 | 655 | 3809 | 5535 | 3.63   | 10.61  |
| 10000 | 0.98 | 0.2500 | 0.7500 | 625 | 3675 | 5625 | 0.57  | 0.2440 | 0.2560 | 0.7440 | 0.7560 | 595 | 3689 | 5715 | 655 | 3809 | 5535 | 2.96   | 7.59   |
| 10000 | 0.99 | 0.2500 | 0.7500 | 625 | 3713 | 5625 | 0.14  | 0.2440 | 0.2560 | 0.7440 | 0.7560 | 595 | 3689 | 5715 | 655 | 3809 | 5535 | 3.05   | 5.32   |
| 10000 | 1.00 | 0.2500 | 0.7500 | 625 | 3750 | 5625 | 0.00  | 0.2440 | 0.2560 | 0.7440 | 0.7560 | 595 | 3689 | 5715 | 655 | 3809 | 5535 | 3.91   | 3.78   |
| 10000 | 1.01 | 0.2500 | 0.7500 | 625 | 3788 | 5625 | 0.14  | 0.2440 | 0.2560 | 0.7440 | 0.7560 | 595 | 3689 | 5715 | 655 | 3809 | 5535 | 5.52   | 2.98   |
| 10000 | 1.02 | 0.2500 | 0.7500 | 625 | 3825 | 5625 | 0.56  | 0.2440 | 0.2560 | 0.7440 | 0.7560 | 595 | 3689 | 5715 | 655 | 3809 | 5535 | 7.90   | 2.92   |

|       |      |        |        |     |      |      |       |        |        |        |        |     |      |      |     |      |      |        |        |
|-------|------|--------|--------|-----|------|------|-------|--------|--------|--------|--------|-----|------|------|-----|------|------|--------|--------|
| 10000 | 1.03 | 0.2500 | 0.7500 | 625 | 3863 | 5625 | 1.24  | 0.2440 | 0.2560 | 0.7440 | 0.7560 | 595 | 3689 | 5715 | 655 | 3809 | 5535 | 11.04  | 3.60   |
| 10000 | 1.04 | 0.2500 | 0.7500 | 625 | 3900 | 5625 | 2.20  | 0.2440 | 0.2560 | 0.7440 | 0.7560 | 595 | 3689 | 5715 | 655 | 3809 | 5535 | 14.94  | 5.02   |
| 10000 | 1.05 | 0.2500 | 0.7500 | 625 | 3938 | 5625 | 3.41  | 0.2440 | 0.2560 | 0.7440 | 0.7560 | 595 | 3689 | 5715 | 655 | 3809 | 5535 | 19.61  | 7.17   |
| 10000 | 1.06 | 0.2500 | 0.7500 | 625 | 3975 | 5625 | 4.88  | 0.2440 | 0.2560 | 0.7440 | 0.7560 | 595 | 3689 | 5715 | 655 | 3809 | 5535 | 25.04  | 10.07  |
| 10000 | 1.07 | 0.2500 | 0.7500 | 625 | 4013 | 5625 | 6.61  | 0.2440 | 0.2560 | 0.7440 | 0.7560 | 595 | 3689 | 5715 | 655 | 3809 | 5535 | 31.23  | 13.70  |
| 10000 | 1.08 | 0.2500 | 0.7500 | 625 | 4050 | 5625 | 8.58  | 0.2440 | 0.2560 | 0.7440 | 0.7560 | 595 | 3689 | 5715 | 655 | 3809 | 5535 | 38.18  | 18.07  |
| 10000 | 1.09 | 0.2500 | 0.7500 | 625 | 4088 | 5625 | 10.79 | 0.2440 | 0.2560 | 0.7440 | 0.7560 | 595 | 3689 | 5715 | 655 | 3809 | 5535 | 45.89  | 23.18  |
| 10000 | 1.10 | 0.2500 | 0.7500 | 625 | 4125 | 5625 | 13.25 | 0.2440 | 0.2560 | 0.7440 | 0.7560 | 595 | 3689 | 5715 | 655 | 3809 | 5535 | 54.37  | 29.02  |
| 10000 | 1.11 | 0.2500 | 0.7500 | 625 | 4163 | 5625 | 15.94 | 0.2440 | 0.2560 | 0.7440 | 0.7560 | 595 | 3689 | 5715 | 655 | 3809 | 5535 | 63.61  | 35.61  |
| 10000 | 1.12 | 0.2500 | 0.7500 | 625 | 4200 | 5625 | 18.86 | 0.2440 | 0.2560 | 0.7440 | 0.7560 | 595 | 3689 | 5715 | 655 | 3809 | 5535 | 73.61  | 42.93  |
| 10000 | 1.13 | 0.2500 | 0.7500 | 625 | 4238 | 5625 | 22.02 | 0.2440 | 0.2560 | 0.7440 | 0.7560 | 595 | 3689 | 5715 | 655 | 3809 | 5535 | 84.37  | 50.99  |
| 10000 | 1.14 | 0.2500 | 0.7500 | 625 | 4275 | 5625 | 25.39 | 0.2440 | 0.2560 | 0.7440 | 0.7560 | 595 | 3689 | 5715 | 655 | 3809 | 5535 | 95.90  | 59.79  |
| 10000 | 1.15 | 0.2500 | 0.7500 | 625 | 4313 | 5625 | 28.99 | 0.2440 | 0.2560 | 0.7440 | 0.7560 | 595 | 3689 | 5715 | 655 | 3809 | 5535 | 108.19 | 69.33  |
| 10000 | 1.16 | 0.2500 | 0.7500 | 625 | 4350 | 5625 | 32.81 | 0.2440 | 0.2560 | 0.7440 | 0.7560 | 595 | 3689 | 5715 | 655 | 3809 | 5535 | 121.24 | 79.61  |
| 10000 | 1.17 | 0.2500 | 0.7500 | 625 | 4388 | 5625 | 36.84 | 0.2440 | 0.2560 | 0.7440 | 0.7560 | 595 | 3689 | 5715 | 655 | 3809 | 5535 | 135.05 | 90.62  |
| 10000 | 1.18 | 0.2500 | 0.7500 | 625 | 4425 | 5625 | 41.08 | 0.2440 | 0.2560 | 0.7440 | 0.7560 | 595 | 3689 | 5715 | 655 | 3809 | 5535 | 149.63 | 102.38 |
| 10000 | 1.19 | 0.2500 | 0.7500 | 625 | 4463 | 5625 | 45.53 | 0.2440 | 0.2560 | 0.7440 | 0.7560 | 595 | 3689 | 5715 | 655 | 3809 | 5535 | 164.97 | 114.87 |
| 10000 | 1.20 | 0.2500 | 0.7500 | 625 | 4500 | 5625 | 50.18 | 0.2440 | 0.2560 | 0.7440 | 0.7560 | 595 | 3689 | 5715 | 655 | 3809 | 5535 | 181.07 | 128.10 |
| 10000 | 0.80 | 0.3000 | 0.7000 | 900 | 3360 | 4900 | 80.11 | 0.2936 | 0.3064 | 0.6936 | 0.7064 | 862 | 4148 | 4989 | 939 | 4250 | 4811 | 153.08 | 189.59 |
| 10000 | 0.81 | 0.3000 | 0.7000 | 900 | 3402 | 4900 | 71.80 | 0.2936 | 0.3064 | 0.6936 | 0.7064 | 862 | 4148 | 4989 | 939 | 4250 | 4811 | 137.54 | 172.41 |
| 10000 | 0.82 | 0.3000 | 0.7000 | 900 | 3444 | 4900 | 64.00 | 0.2936 | 0.3064 | 0.6936 | 0.7064 | 862 | 4148 | 4989 | 939 | 4250 | 4811 | 122.85 | 156.06 |
| 10000 | 0.83 | 0.3000 | 0.7000 | 900 | 3486 | 4900 | 56.70 | 0.2936 | 0.3064 | 0.6936 | 0.7064 | 862 | 4148 | 4989 | 939 | 4250 | 4811 | 109.01 | 140.55 |
| 10000 | 0.84 | 0.3000 | 0.7000 | 900 | 3528 | 4900 | 49.89 | 0.2936 | 0.3064 | 0.6936 | 0.7064 | 862 | 4148 | 4989 | 939 | 4250 | 4811 | 96.03  | 125.86 |
| 10000 | 0.85 | 0.3000 | 0.7000 | 900 | 3570 | 4900 | 43.56 | 0.2936 | 0.3064 | 0.6936 | 0.7064 | 862 | 4148 | 4989 | 939 | 4250 | 4811 | 83.89  | 112.01 |
| 10000 | 0.86 | 0.3000 | 0.7000 | 900 | 3612 | 4900 | 37.69 | 0.2936 | 0.3064 | 0.6936 | 0.7064 | 862 | 4148 | 4989 | 939 | 4250 | 4811 | 72.60  | 98.98  |
| 10000 | 0.87 | 0.3000 | 0.7000 | 900 | 3654 | 4900 | 32.29 | 0.2936 | 0.3064 | 0.6936 | 0.7064 | 862 | 4148 | 4989 | 939 | 4250 | 4811 | 62.17  | 86.79  |
| 10000 | 0.88 | 0.3000 | 0.7000 | 900 | 3696 | 4900 | 27.33 | 0.2936 | 0.3064 | 0.6936 | 0.7064 | 862 | 4148 | 4989 | 939 | 4250 | 4811 | 52.58  | 75.42  |
| 10000 | 0.89 | 0.3000 | 0.7000 | 900 | 3738 | 4900 | 22.82 | 0.2936 | 0.3064 | 0.6936 | 0.7064 | 862 | 4148 | 4989 | 939 | 4250 | 4811 | 43.85  | 64.89  |
| 10000 | 0.90 | 0.3000 | 0.7000 | 900 | 3780 | 4900 | 18.74 | 0.2936 | 0.3064 | 0.6936 | 0.7064 | 862 | 4148 | 4989 | 939 | 4250 | 4811 | 35.96  | 55.19  |
| 10000 | 0.91 | 0.3000 | 0.7000 | 900 | 3822 | 4900 | 15.09 | 0.2936 | 0.3064 | 0.6936 | 0.7064 | 862 | 4148 | 4989 | 939 | 4250 | 4811 | 28.93  | 46.31  |
| 10000 | 0.92 | 0.3000 | 0.7000 | 900 | 3864 | 4900 | 11.84 | 0.2936 | 0.3064 | 0.6936 | 0.7064 | 862 | 4148 | 4989 | 939 | 4250 | 4811 | 22.74  | 38.27  |
| 10000 | 0.93 | 0.3000 | 0.7000 | 900 | 3906 | 4900 | 9.01  | 0.2936 | 0.3064 | 0.6936 | 0.7064 | 862 | 4148 | 4989 | 939 | 4250 | 4811 | 17.41  | 31.05  |
| 10000 | 0.94 | 0.3000 | 0.7000 | 900 | 3948 | 4900 | 6.58  | 0.2936 | 0.3064 | 0.6936 | 0.7064 | 862 | 4148 | 4989 | 939 | 4250 | 4811 | 12.93  | 24.67  |
| 10000 | 0.95 | 0.3000 | 0.7000 | 900 | 3990 | 4900 | 4.54  | 0.2936 | 0.3064 | 0.6936 | 0.7064 | 862 | 4148 | 4989 | 939 | 4250 | 4811 | 9.29   | 19.11  |
| 10000 | 0.96 | 0.3000 | 0.7000 | 900 | 4032 | 4900 | 2.89  | 0.2936 | 0.3064 | 0.6936 | 0.7064 | 862 | 4148 | 4989 | 939 | 4250 | 4811 | 6.51   | 14.39  |

|       |      |        |        |      |      |      |       |        |        |        |        |      |      |      |      |      |      |        |        |
|-------|------|--------|--------|------|------|------|-------|--------|--------|--------|--------|------|------|------|------|------|------|--------|--------|
| 10000 | 0.97 | 0.3000 | 0.7000 | 900  | 4074 | 4900 | 1.62  | 0.2936 | 0.3064 | 0.6936 | 0.7064 | 862  | 4148 | 4989 | 939  | 4250 | 4811 | 4.58   | 10.50  |
| 10000 | 0.98 | 0.3000 | 0.7000 | 900  | 4116 | 4900 | 0.71  | 0.2936 | 0.3064 | 0.6936 | 0.7064 | 862  | 4148 | 4989 | 939  | 4250 | 4811 | 3.50   | 7.43   |
| 10000 | 0.99 | 0.3000 | 0.7000 | 900  | 4158 | 4900 | 0.18  | 0.2936 | 0.3064 | 0.6936 | 0.7064 | 862  | 4148 | 4989 | 939  | 4250 | 4811 | 3.27   | 5.20   |
| 10000 | 1.00 | 0.3000 | 0.7000 | 900  | 4200 | 4900 | 0.00  | 0.2936 | 0.3064 | 0.6936 | 0.7064 | 862  | 4148 | 4989 | 939  | 4250 | 4811 | 3.89   | 3.80   |
| 10000 | 1.01 | 0.3000 | 0.7000 | 900  | 4242 | 4900 | 0.18  | 0.2936 | 0.3064 | 0.6936 | 0.7064 | 862  | 4148 | 4989 | 939  | 4250 | 4811 | 5.36   | 3.22   |
| 10000 | 1.02 | 0.3000 | 0.7000 | 900  | 4284 | 4900 | 0.70  | 0.2936 | 0.3064 | 0.6936 | 0.7064 | 862  | 4148 | 4989 | 939  | 4250 | 4811 | 7.68   | 3.48   |
| 10000 | 1.03 | 0.3000 | 0.7000 | 900  | 4326 | 4900 | 1.56  | 0.2936 | 0.3064 | 0.6936 | 0.7064 | 862  | 4148 | 4989 | 939  | 4250 | 4811 | 10.85  | 4.57   |
| 10000 | 1.04 | 0.3000 | 0.7000 | 900  | 4368 | 4900 | 2.76  | 0.2936 | 0.3064 | 0.6936 | 0.7064 | 862  | 4148 | 4989 | 939  | 4250 | 4811 | 14.87  | 6.48   |
| 10000 | 1.05 | 0.3000 | 0.7000 | 900  | 4410 | 4900 | 4.29  | 0.2936 | 0.3064 | 0.6936 | 0.7064 | 862  | 4148 | 4989 | 939  | 4250 | 4811 | 19.75  | 9.23   |
| 10000 | 1.06 | 0.3000 | 0.7000 | 900  | 4452 | 4900 | 6.14  | 0.2936 | 0.3064 | 0.6936 | 0.7064 | 862  | 4148 | 4989 | 939  | 4250 | 4811 | 25.47  | 12.81  |
| 10000 | 1.07 | 0.3000 | 0.7000 | 900  | 4494 | 4900 | 8.31  | 0.2936 | 0.3064 | 0.6936 | 0.7064 | 862  | 4148 | 4989 | 939  | 4250 | 4811 | 32.04  | 17.22  |
| 10000 | 1.08 | 0.3000 | 0.7000 | 900  | 4536 | 4900 | 10.79 | 0.2936 | 0.3064 | 0.6936 | 0.7064 | 862  | 4148 | 4989 | 939  | 4250 | 4811 | 39.47  | 22.45  |
| 10000 | 1.09 | 0.3000 | 0.7000 | 900  | 4578 | 4900 | 13.59 | 0.2936 | 0.3064 | 0.6936 | 0.7064 | 862  | 4148 | 4989 | 939  | 4250 | 4811 | 47.74  | 28.52  |
| 10000 | 1.10 | 0.3000 | 0.7000 | 900  | 4620 | 4900 | 16.68 | 0.2936 | 0.3064 | 0.6936 | 0.7064 | 862  | 4148 | 4989 | 939  | 4250 | 4811 | 56.86  | 35.42  |
| 10000 | 1.11 | 0.3000 | 0.7000 | 900  | 4662 | 4900 | 20.08 | 0.2936 | 0.3064 | 0.6936 | 0.7064 | 862  | 4148 | 4989 | 939  | 4250 | 4811 | 66.84  | 43.15  |
| 10000 | 1.12 | 0.3000 | 0.7000 | 900  | 4704 | 4900 | 23.77 | 0.2936 | 0.3064 | 0.6936 | 0.7064 | 862  | 4148 | 4989 | 939  | 4250 | 4811 | 77.66  | 51.71  |
| 10000 | 1.13 | 0.3000 | 0.7000 | 900  | 4746 | 4900 | 27.75 | 0.2936 | 0.3064 | 0.6936 | 0.7064 | 862  | 4148 | 4989 | 939  | 4250 | 4811 | 89.34  | 61.09  |
| 10000 | 1.14 | 0.3000 | 0.7000 | 900  | 4788 | 4900 | 32.02 | 0.2936 | 0.3064 | 0.6936 | 0.7064 | 862  | 4148 | 4989 | 939  | 4250 | 4811 | 101.87 | 71.31  |
| 10000 | 1.15 | 0.3000 | 0.7000 | 900  | 4830 | 4900 | 36.57 | 0.2936 | 0.3064 | 0.6936 | 0.7064 | 862  | 4148 | 4989 | 939  | 4250 | 4811 | 115.24 | 82.36  |
| 10000 | 1.16 | 0.3000 | 0.7000 | 900  | 4872 | 4900 | 41.39 | 0.2936 | 0.3064 | 0.6936 | 0.7064 | 862  | 4148 | 4989 | 939  | 4250 | 4811 | 129.47 | 94.24  |
| 10000 | 1.17 | 0.3000 | 0.7000 | 900  | 4914 | 4900 | 46.49 | 0.2936 | 0.3064 | 0.6936 | 0.7064 | 862  | 4148 | 4989 | 939  | 4250 | 4811 | 144.55 | 106.95 |
| 10000 | 1.18 | 0.3000 | 0.7000 | 900  | 4956 | 4900 | 51.85 | 0.2936 | 0.3064 | 0.6936 | 0.7064 | 862  | 4148 | 4989 | 939  | 4250 | 4811 | 160.48 | 120.49 |
| 10000 | 1.19 | 0.3000 | 0.7000 | 900  | 4998 | 4900 | 57.49 | 0.2936 | 0.3064 | 0.6936 | 0.7064 | 862  | 4148 | 4989 | 939  | 4250 | 4811 | 177.25 | 134.86 |
| 10000 | 1.20 | 0.3000 | 0.7000 | 900  | 5040 | 4900 | 63.38 | 0.2936 | 0.3064 | 0.6936 | 0.7064 | 862  | 4148 | 4989 | 939  | 4250 | 4811 | 194.88 | 150.05 |
| 10000 | 0.80 | 0.3500 | 0.6500 | 1225 | 3640 | 4225 | 93.14 | 0.3434 | 0.3566 | 0.6434 | 0.6566 | 1179 | 4509 | 4311 | 1272 | 4589 | 4140 | 171.15 | 199.66 |
| 10000 | 0.81 | 0.3500 | 0.6500 | 1225 | 3686 | 4225 | 83.53 | 0.3434 | 0.3566 | 0.6434 | 0.6566 | 1179 | 4509 | 4311 | 1272 | 4589 | 4140 | 154.07 | 181.29 |
| 10000 | 0.82 | 0.3500 | 0.6500 | 1225 | 3731 | 4225 | 74.50 | 0.3434 | 0.3566 | 0.6434 | 0.6566 | 1179 | 4509 | 4311 | 1272 | 4589 | 4140 | 137.90 | 163.83 |
| 10000 | 0.83 | 0.3500 | 0.6500 | 1225 | 3777 | 4225 | 66.04 | 0.3434 | 0.3566 | 0.6434 | 0.6566 | 1179 | 4509 | 4311 | 1272 | 4589 | 4140 | 122.65 | 147.27 |
| 10000 | 0.84 | 0.3500 | 0.6500 | 1225 | 3822 | 4225 | 58.14 | 0.3434 | 0.3566 | 0.6434 | 0.6566 | 1179 | 4509 | 4311 | 1272 | 4589 | 4140 | 108.32 | 131.61 |
| 10000 | 0.85 | 0.3500 | 0.6500 | 1225 | 3868 | 4225 | 50.78 | 0.3434 | 0.3566 | 0.6434 | 0.6566 | 1179 | 4509 | 4311 | 1272 | 4589 | 4140 | 94.90  | 116.86 |
| 10000 | 0.86 | 0.3500 | 0.6500 | 1225 | 3913 | 4225 | 43.97 | 0.3434 | 0.3566 | 0.6434 | 0.6566 | 1179 | 4509 | 4311 | 1272 | 4589 | 4140 | 82.41  | 103.00 |
| 10000 | 0.87 | 0.3500 | 0.6500 | 1225 | 3959 | 4225 | 37.69 | 0.3434 | 0.3566 | 0.6434 | 0.6566 | 1179 | 4509 | 4311 | 1272 | 4589 | 4140 | 70.83  | 90.05  |
| 10000 | 0.88 | 0.3500 | 0.6500 | 1225 | 4004 | 4225 | 31.92 | 0.3434 | 0.3566 | 0.6434 | 0.6566 | 1179 | 4509 | 4311 | 1272 | 4589 | 4140 | 60.17  | 78.01  |
| 10000 | 0.89 | 0.3500 | 0.6500 | 1225 | 4050 | 4225 | 26.66 | 0.3434 | 0.3566 | 0.6434 | 0.6566 | 1179 | 4509 | 4311 | 1272 | 4589 | 4140 | 50.43  | 66.86  |
| 10000 | 0.90 | 0.3500 | 0.6500 | 1225 | 4095 | 4225 | 21.91 | 0.3434 | 0.3566 | 0.6434 | 0.6566 | 1179 | 4509 | 4311 | 1272 | 4589 | 4140 | 41.61  | 56.62  |

|       |      |        |        |      |      |      |        |        |        |        |        |      |      |      |      |      |      |        |        |
|-------|------|--------|--------|------|------|------|--------|--------|--------|--------|--------|------|------|------|------|------|------|--------|--------|
| 10000 | 0.91 | 0.3500 | 0.6500 | 1225 | 4141 | 4225 | 17.64  | 0.3434 | 0.3566 | 0.6434 | 0.6566 | 1179 | 4509 | 4311 | 1272 | 4589 | 4140 | 33.70  | 47.28  |
| 10000 | 0.92 | 0.3500 | 0.6500 | 1225 | 4186 | 4225 | 13.86  | 0.3434 | 0.3566 | 0.6434 | 0.6566 | 1179 | 4509 | 4311 | 1272 | 4589 | 4140 | 26.71  | 38.84  |
| 10000 | 0.93 | 0.3500 | 0.6500 | 1225 | 4232 | 4225 | 10.55  | 0.3434 | 0.3566 | 0.6434 | 0.6566 | 1179 | 4509 | 4311 | 1272 | 4589 | 4140 | 20.65  | 31.30  |
| 10000 | 0.94 | 0.3500 | 0.6500 | 1225 | 4277 | 4225 | 7.71   | 0.3434 | 0.3566 | 0.6434 | 0.6566 | 1179 | 4509 | 4311 | 1272 | 4589 | 4140 | 15.50  | 24.67  |
| 10000 | 0.95 | 0.3500 | 0.6500 | 1225 | 4323 | 4225 | 5.32   | 0.3434 | 0.3566 | 0.6434 | 0.6566 | 1179 | 4509 | 4311 | 1272 | 4589 | 4140 | 11.26  | 18.93  |
| 10000 | 0.96 | 0.3500 | 0.6500 | 1225 | 4368 | 4225 | 3.39   | 0.3434 | 0.3566 | 0.6434 | 0.6566 | 1179 | 4509 | 4311 | 1272 | 4589 | 4140 | 7.95   | 14.10  |
| 10000 | 0.97 | 0.3500 | 0.6500 | 1225 | 4414 | 4225 | 1.89   | 0.3434 | 0.3566 | 0.6434 | 0.6566 | 1179 | 4509 | 4311 | 1272 | 4589 | 4140 | 5.55   | 10.18  |
| 10000 | 0.98 | 0.3500 | 0.6500 | 1225 | 4459 | 4225 | 0.84   | 0.3434 | 0.3566 | 0.6434 | 0.6566 | 1179 | 4509 | 4311 | 1272 | 4589 | 4140 | 4.08   | 7.15   |
| 10000 | 0.99 | 0.3500 | 0.6500 | 1225 | 4505 | 4225 | 0.21   | 0.3434 | 0.3566 | 0.6434 | 0.6566 | 1179 | 4509 | 4311 | 1272 | 4589 | 4140 | 3.52   | 5.03   |
| 10000 | 1.00 | 0.3500 | 0.6500 | 1225 | 4550 | 4225 | 0.00   | 0.3434 | 0.3566 | 0.6434 | 0.6566 | 1179 | 4509 | 4311 | 1272 | 4589 | 4140 | 3.88   | 3.81   |
| 10000 | 1.01 | 0.3500 | 0.6500 | 1225 | 4596 | 4225 | 0.21   | 0.3434 | 0.3566 | 0.6434 | 0.6566 | 1179 | 4509 | 4311 | 1272 | 4589 | 4140 | 5.15   | 3.49   |
| 10000 | 1.02 | 0.3500 | 0.6500 | 1225 | 4641 | 4225 | 0.82   | 0.3434 | 0.3566 | 0.6434 | 0.6566 | 1179 | 4509 | 4311 | 1272 | 4589 | 4140 | 7.35   | 4.08   |
| 10000 | 1.03 | 0.3500 | 0.6500 | 1225 | 4687 | 4225 | 1.83   | 0.3434 | 0.3566 | 0.6434 | 0.6566 | 1179 | 4509 | 4311 | 1272 | 4589 | 4140 | 10.46  | 5.56   |
| 10000 | 1.04 | 0.3500 | 0.6500 | 1225 | 4732 | 4225 | 3.24   | 0.3434 | 0.3566 | 0.6434 | 0.6566 | 1179 | 4509 | 4311 | 1272 | 4589 | 4140 | 14.49  | 7.95   |
| 10000 | 1.05 | 0.3500 | 0.6500 | 1225 | 4778 | 4225 | 5.04   | 0.3434 | 0.3566 | 0.6434 | 0.6566 | 1179 | 4509 | 4311 | 1272 | 4589 | 4140 | 19.44  | 11.24  |
| 10000 | 1.06 | 0.3500 | 0.6500 | 1225 | 4823 | 4225 | 7.22   | 0.3434 | 0.3566 | 0.6434 | 0.6566 | 1179 | 4509 | 4311 | 1272 | 4589 | 4140 | 25.31  | 15.44  |
| 10000 | 1.07 | 0.3500 | 0.6500 | 1225 | 4869 | 4225 | 9.77   | 0.3434 | 0.3566 | 0.6434 | 0.6566 | 1179 | 4509 | 4311 | 1272 | 4589 | 4140 | 32.10  | 20.53  |
| 10000 | 1.08 | 0.3500 | 0.6500 | 1225 | 4914 | 4225 | 12.70  | 0.3434 | 0.3566 | 0.6434 | 0.6566 | 1179 | 4509 | 4311 | 1272 | 4589 | 4140 | 39.80  | 26.53  |
| 10000 | 1.09 | 0.3500 | 0.6500 | 1225 | 4960 | 4225 | 15.99  | 0.3434 | 0.3566 | 0.6434 | 0.6566 | 1179 | 4509 | 4311 | 1272 | 4589 | 4140 | 48.43  | 33.43  |
| 10000 | 1.10 | 0.3500 | 0.6500 | 1225 | 5005 | 4225 | 19.64  | 0.3434 | 0.3566 | 0.6434 | 0.6566 | 1179 | 4509 | 4311 | 1272 | 4589 | 4140 | 57.97  | 41.23  |
| 10000 | 1.11 | 0.3500 | 0.6500 | 1225 | 5051 | 4225 | 23.64  | 0.3434 | 0.3566 | 0.6434 | 0.6566 | 1179 | 4509 | 4311 | 1272 | 4589 | 4140 | 68.42  | 49.94  |
| 10000 | 1.12 | 0.3500 | 0.6500 | 1225 | 5096 | 4225 | 28.00  | 0.3434 | 0.3566 | 0.6434 | 0.6566 | 1179 | 4509 | 4311 | 1272 | 4589 | 4140 | 79.80  | 59.55  |
| 10000 | 1.13 | 0.3500 | 0.6500 | 1225 | 5142 | 4225 | 32.69  | 0.3434 | 0.3566 | 0.6434 | 0.6566 | 1179 | 4509 | 4311 | 1272 | 4589 | 4140 | 92.10  | 70.05  |
| 10000 | 1.14 | 0.3500 | 0.6500 | 1225 | 5187 | 4225 | 37.73  | 0.3434 | 0.3566 | 0.6434 | 0.6566 | 1179 | 4509 | 4311 | 1272 | 4589 | 4140 | 105.31 | 81.47  |
| 10000 | 1.15 | 0.3500 | 0.6500 | 1225 | 5233 | 4225 | 43.10  | 0.3434 | 0.3566 | 0.6434 | 0.6566 | 1179 | 4509 | 4311 | 1272 | 4589 | 4140 | 119.44 | 93.78  |
| 10000 | 1.16 | 0.3500 | 0.6500 | 1225 | 5278 | 4225 | 48.79  | 0.3434 | 0.3566 | 0.6434 | 0.6566 | 1179 | 4509 | 4311 | 1272 | 4589 | 4140 | 134.49 | 107.00 |
| 10000 | 1.17 | 0.3500 | 0.6500 | 1225 | 5324 | 4225 | 54.81  | 0.3434 | 0.3566 | 0.6434 | 0.6566 | 1179 | 4509 | 4311 | 1272 | 4589 | 4140 | 150.46 | 121.12 |
| 10000 | 1.18 | 0.3500 | 0.6500 | 1225 | 5369 | 4225 | 61.16  | 0.3434 | 0.3566 | 0.6434 | 0.6566 | 1179 | 4509 | 4311 | 1272 | 4589 | 4140 | 167.35 | 136.14 |
| 10000 | 1.19 | 0.3500 | 0.6500 | 1225 | 5415 | 4225 | 67.81  | 0.3434 | 0.3566 | 0.6434 | 0.6566 | 1179 | 4509 | 4311 | 1272 | 4589 | 4140 | 185.15 | 152.06 |
| 10000 | 1.20 | 0.3500 | 0.6500 | 1225 | 5460 | 4225 | 74.78  | 0.3434 | 0.3566 | 0.6434 | 0.6566 | 1179 | 4509 | 4311 | 1272 | 4589 | 4140 | 203.87 | 168.89 |
| 10000 | 0.80 | 0.4000 | 0.6000 | 1600 | 3840 | 3600 | 102.96 | 0.3932 | 0.4068 | 0.5932 | 0.6068 | 1546 | 4772 | 3682 | 1655 | 4826 | 3519 | 185.70 | 205.21 |
| 10000 | 0.81 | 0.4000 | 0.6000 | 1600 | 3888 | 3600 | 92.37  | 0.3932 | 0.4068 | 0.5932 | 0.6068 | 1546 | 4772 | 3682 | 1655 | 4826 | 3519 | 167.43 | 186.07 |
| 10000 | 0.82 | 0.4000 | 0.6000 | 1600 | 3936 | 3600 | 82.42  | 0.3932 | 0.4068 | 0.5932 | 0.6068 | 1546 | 4772 | 3682 | 1655 | 4826 | 3519 | 150.13 | 167.89 |
| 10000 | 0.83 | 0.4000 | 0.6000 | 1600 | 3984 | 3600 | 73.09  | 0.3932 | 0.4068 | 0.5932 | 0.6068 | 1546 | 4772 | 3682 | 1655 | 4826 | 3519 | 133.80 | 150.66 |
| 10000 | 0.84 | 0.4000 | 0.6000 | 1600 | 4032 | 3600 | 64.37  | 0.3932 | 0.4068 | 0.5932 | 0.6068 | 1546 | 4772 | 3682 | 1655 | 4826 | 3519 | 118.43 | 134.38 |



|       |      |        |        |      |      |      |       |        |        |        |        |      |      |      |      |      |      |        |        |
|-------|------|--------|--------|------|------|------|-------|--------|--------|--------|--------|------|------|------|------|------|------|--------|--------|
| 10000 | 0.85 | 0.4000 | 0.6000 | 1600 | 4080 | 3600 | 56.25 | 0.3932 | 0.4068 | 0.5932 | 0.6068 | 1546 | 4772 | 3682 | 1655 | 4826 | 3519 | 104.03 | 119.06 |
| 10000 | 0.86 | 0.4000 | 0.6000 | 1600 | 4128 | 3600 | 48.73 | 0.3932 | 0.4068 | 0.5932 | 0.6068 | 1546 | 4772 | 3682 | 1655 | 4826 | 3519 | 90.59  | 104.70 |
| 10000 | 0.87 | 0.4000 | 0.6000 | 1600 | 4176 | 3600 | 41.78 | 0.3932 | 0.4068 | 0.5932 | 0.6068 | 1546 | 4772 | 3682 | 1655 | 4826 | 3519 | 78.12  | 91.28  |
| 10000 | 0.88 | 0.4000 | 0.6000 | 1600 | 4224 | 3600 | 35.40 | 0.3932 | 0.4068 | 0.5932 | 0.6068 | 1546 | 4772 | 3682 | 1655 | 4826 | 3519 | 66.61  | 78.83  |
| 10000 | 0.89 | 0.4000 | 0.6000 | 1600 | 4272 | 3600 | 29.58 | 0.3932 | 0.4068 | 0.5932 | 0.6068 | 1546 | 4772 | 3682 | 1655 | 4826 | 3519 | 56.07  | 67.33  |
| 10000 | 0.90 | 0.4000 | 0.6000 | 1600 | 4320 | 3600 | 24.31 | 0.3932 | 0.4068 | 0.5932 | 0.6068 | 1546 | 4772 | 3682 | 1655 | 4826 | 3519 | 46.50  | 56.78  |
| 10000 | 0.91 | 0.4000 | 0.6000 | 1600 | 4368 | 3600 | 19.58 | 0.3932 | 0.4068 | 0.5932 | 0.6068 | 1546 | 4772 | 3682 | 1655 | 4826 | 3519 | 37.89  | 47.19  |
| 10000 | 0.92 | 0.4000 | 0.6000 | 1600 | 4416 | 3600 | 15.39 | 0.3932 | 0.4068 | 0.5932 | 0.6068 | 1546 | 4772 | 3682 | 1655 | 4826 | 3519 | 30.25  | 38.55  |
| 10000 | 0.93 | 0.4000 | 0.6000 | 1600 | 4464 | 3600 | 11.72 | 0.3932 | 0.4068 | 0.5932 | 0.6068 | 1546 | 4772 | 3682 | 1655 | 4826 | 3519 | 23.57  | 30.87  |
| 10000 | 0.94 | 0.4000 | 0.6000 | 1600 | 4512 | 3600 | 8.56  | 0.3932 | 0.4068 | 0.5932 | 0.6068 | 1546 | 4772 | 3682 | 1655 | 4826 | 3519 | 17.86  | 24.14  |
| 10000 | 0.95 | 0.4000 | 0.6000 | 1600 | 4560 | 3600 | 5.91  | 0.3932 | 0.4068 | 0.5932 | 0.6068 | 1546 | 4772 | 3682 | 1655 | 4826 | 3519 | 13.11  | 18.37  |
| 10000 | 0.96 | 0.4000 | 0.6000 | 1600 | 4608 | 3600 | 3.76  | 0.3932 | 0.4068 | 0.5932 | 0.6068 | 1546 | 4772 | 3682 | 1655 | 4826 | 3519 | 9.33   | 13.55  |
| 10000 | 0.97 | 0.4000 | 0.6000 | 1600 | 4656 | 3600 | 2.11  | 0.3932 | 0.4068 | 0.5932 | 0.6068 | 1546 | 4772 | 3682 | 1655 | 4826 | 3519 | 6.52   | 9.68   |
| 10000 | 0.98 | 0.4000 | 0.6000 | 1600 | 4704 | 3600 | 0.93  | 0.3932 | 0.4068 | 0.5932 | 0.6068 | 1546 | 4772 | 3682 | 1655 | 4826 | 3519 | 4.67   | 6.77   |
| 10000 | 0.99 | 0.4000 | 0.6000 | 1600 | 4752 | 3600 | 0.23  | 0.3932 | 0.4068 | 0.5932 | 0.6068 | 1546 | 4772 | 3682 | 1655 | 4826 | 3519 | 3.78   | 4.82   |
| 10000 | 1.00 | 0.4000 | 0.6000 | 1600 | 4800 | 3600 | 0.00  | 0.3932 | 0.4068 | 0.5932 | 0.6068 | 1546 | 4772 | 3682 | 1655 | 4826 | 3519 | 3.86   | 3.82   |
| 10000 | 1.01 | 0.4000 | 0.6000 | 1600 | 4848 | 3600 | 0.23  | 0.3932 | 0.4068 | 0.5932 | 0.6068 | 1546 | 4772 | 3682 | 1655 | 4826 | 3519 | 4.91   | 3.78   |
| 10000 | 1.02 | 0.4000 | 0.6000 | 1600 | 4896 | 3600 | 0.91  | 0.3932 | 0.4068 | 0.5932 | 0.6068 | 1546 | 4772 | 3682 | 1655 | 4826 | 3519 | 6.93   | 4.69   |
| 10000 | 1.03 | 0.4000 | 0.6000 | 1600 | 4944 | 3600 | 2.04  | 0.3932 | 0.4068 | 0.5932 | 0.6068 | 1546 | 4772 | 3682 | 1655 | 4826 | 3519 | 9.90   | 6.55   |
| 10000 | 1.04 | 0.4000 | 0.6000 | 1600 | 4992 | 3600 | 3.61  | 0.3932 | 0.4068 | 0.5932 | 0.6068 | 1546 | 4772 | 3682 | 1655 | 4826 | 3519 | 13.85  | 9.37   |
| 10000 | 1.05 | 0.4000 | 0.6000 | 1600 | 5040 | 3600 | 5.61  | 0.3932 | 0.4068 | 0.5932 | 0.6068 | 1546 | 4772 | 3682 | 1655 | 4826 | 3519 | 18.76  | 13.15  |
| 10000 | 1.06 | 0.4000 | 0.6000 | 1600 | 5088 | 3600 | 8.04  | 0.3932 | 0.4068 | 0.5932 | 0.6068 | 1546 | 4772 | 3682 | 1655 | 4826 | 3519 | 24.64  | 17.88  |
| 10000 | 1.07 | 0.4000 | 0.6000 | 1600 | 5136 | 3600 | 10.89 | 0.3932 | 0.4068 | 0.5932 | 0.6068 | 1546 | 4772 | 3682 | 1655 | 4826 | 3519 | 31.48  | 23.56  |
| 10000 | 1.08 | 0.4000 | 0.6000 | 1600 | 5184 | 3600 | 14.16 | 0.3932 | 0.4068 | 0.5932 | 0.6068 | 1546 | 4772 | 3682 | 1655 | 4826 | 3519 | 39.28  | 30.20  |
| 10000 | 1.09 | 0.4000 | 0.6000 | 1600 | 5232 | 3600 | 17.83 | 0.3932 | 0.4068 | 0.5932 | 0.6068 | 1546 | 4772 | 3682 | 1655 | 4826 | 3519 | 48.06  | 37.79  |
| 10000 | 1.10 | 0.4000 | 0.6000 | 1600 | 5280 | 3600 | 21.91 | 0.3932 | 0.4068 | 0.5932 | 0.6068 | 1546 | 4772 | 3682 | 1655 | 4826 | 3519 | 57.80  | 46.34  |
| 10000 | 1.11 | 0.4000 | 0.6000 | 1600 | 5328 | 3600 | 26.38 | 0.3932 | 0.4068 | 0.5932 | 0.6068 | 1546 | 4772 | 3682 | 1655 | 4826 | 3519 | 68.50  | 55.84  |
| 10000 | 1.12 | 0.4000 | 0.6000 | 1600 | 5376 | 3600 | 31.24 | 0.3932 | 0.4068 | 0.5932 | 0.6068 | 1546 | 4772 | 3682 | 1655 | 4826 | 3519 | 80.17  | 66.30  |
| 10000 | 1.13 | 0.4000 | 0.6000 | 1600 | 5424 | 3600 | 36.48 | 0.3932 | 0.4068 | 0.5932 | 0.6068 | 1546 | 4772 | 3682 | 1655 | 4826 | 3519 | 92.81  | 77.72  |
| 10000 | 1.14 | 0.4000 | 0.6000 | 1600 | 5472 | 3600 | 42.11 | 0.3932 | 0.4068 | 0.5932 | 0.6068 | 1546 | 4772 | 3682 | 1655 | 4826 | 3519 | 106.41 | 90.08  |
| 10000 | 1.15 | 0.4000 | 0.6000 | 1600 | 5520 | 3600 | 48.11 | 0.3932 | 0.4068 | 0.5932 | 0.6068 | 1546 | 4772 | 3682 | 1655 | 4826 | 3519 | 120.97 | 103.41 |
| 10000 | 1.16 | 0.4000 | 0.6000 | 1600 | 5568 | 3600 | 54.48 | 0.3932 | 0.4068 | 0.5932 | 0.6068 | 1546 | 4772 | 3682 | 1655 | 4826 | 3519 | 136.51 | 117.68 |
| 10000 | 1.17 | 0.4000 | 0.6000 | 1600 | 5616 | 3600 | 61.21 | 0.3932 | 0.4068 | 0.5932 | 0.6068 | 1546 | 4772 | 3682 | 1655 | 4826 | 3519 | 153.00 | 132.92 |
| 10000 | 1.18 | 0.4000 | 0.6000 | 1600 | 5664 | 3600 | 68.30 | 0.3932 | 0.4068 | 0.5932 | 0.6068 | 1546 | 4772 | 3682 | 1655 | 4826 | 3519 | 170.47 | 149.10 |
| 10000 | 1.19 | 0.4000 | 0.6000 | 1600 | 5712 | 3600 | 75.74 | 0.3932 | 0.4068 | 0.5932 | 0.6068 | 1546 | 4772 | 3682 | 1655 | 4826 | 3519 | 188.90 | 166.24 |

|       |      |        |        |      |      |      |        |        |        |        |        |      |      |      |      |      |      |        |        |
|-------|------|--------|--------|------|------|------|--------|--------|--------|--------|--------|------|------|------|------|------|------|--------|--------|
| 10000 | 1.20 | 0.4000 | 0.6000 | 1600 | 5760 | 3600 | 83.53  | 0.3932 | 0.4068 | 0.5932 | 0.6068 | 1546 | 4772 | 3682 | 1655 | 4826 | 3519 | 208.29 | 184.34 |
| 10000 | 0.80 | 0.4500 | 0.5500 | 2025 | 3960 | 3025 | 109.05 | 0.4431 | 0.4569 | 0.5431 | 0.5569 | 1963 | 4935 | 3101 | 2088 | 4963 | 2950 | 196.53 | 206.44 |
| 10000 | 0.81 | 0.4500 | 0.5500 | 2025 | 4010 | 3025 | 97.86  | 0.4431 | 0.4569 | 0.5431 | 0.5569 | 1963 | 4935 | 3101 | 2088 | 4963 | 2950 | 177.46 | 186.93 |
| 10000 | 0.82 | 0.4500 | 0.5500 | 2025 | 4059 | 3025 | 87.34  | 0.4431 | 0.4569 | 0.5431 | 0.5569 | 1963 | 4935 | 3101 | 2088 | 4963 | 2950 | 159.39 | 168.41 |
| 10000 | 0.83 | 0.4500 | 0.5500 | 2025 | 4109 | 3025 | 77.48  | 0.4431 | 0.4569 | 0.5431 | 0.5569 | 1963 | 4935 | 3101 | 2088 | 4963 | 2950 | 142.31 | 150.87 |
| 10000 | 0.84 | 0.4500 | 0.5500 | 2025 | 4158 | 3025 | 68.25  | 0.4431 | 0.4569 | 0.5431 | 0.5569 | 1963 | 4935 | 3101 | 2088 | 4963 | 2950 | 126.22 | 134.32 |
| 10000 | 0.85 | 0.4500 | 0.5500 | 2025 | 4208 | 3025 | 59.66  | 0.4431 | 0.4569 | 0.5431 | 0.5569 | 1963 | 4935 | 3101 | 2088 | 4963 | 2950 | 111.13 | 118.76 |
| 10000 | 0.86 | 0.4500 | 0.5500 | 2025 | 4257 | 3025 | 51.68  | 0.4431 | 0.4569 | 0.5431 | 0.5569 | 1963 | 4935 | 3101 | 2088 | 4963 | 2950 | 97.02  | 104.19 |
| 10000 | 0.87 | 0.4500 | 0.5500 | 2025 | 4307 | 3025 | 44.32  | 0.4431 | 0.4569 | 0.5431 | 0.5569 | 1963 | 4935 | 3101 | 2088 | 4963 | 2950 | 83.91  | 90.60  |
| 10000 | 0.88 | 0.4500 | 0.5500 | 2025 | 4356 | 3025 | 37.56  | 0.4431 | 0.4569 | 0.5431 | 0.5569 | 1963 | 4935 | 3101 | 2088 | 4963 | 2950 | 71.80  | 78.00  |
| 10000 | 0.89 | 0.4500 | 0.5500 | 2025 | 4406 | 3025 | 31.39  | 0.4431 | 0.4569 | 0.5431 | 0.5569 | 1963 | 4935 | 3101 | 2088 | 4963 | 2950 | 60.67  | 66.39  |
| 10000 | 0.90 | 0.4500 | 0.5500 | 2025 | 4455 | 3025 | 25.81  | 0.4431 | 0.4569 | 0.5431 | 0.5569 | 1963 | 4935 | 3101 | 2088 | 4963 | 2950 | 50.54  | 55.77  |
| 10000 | 0.91 | 0.4500 | 0.5500 | 2025 | 4505 | 3025 | 20.79  | 0.4431 | 0.4569 | 0.5431 | 0.5569 | 1963 | 4935 | 3101 | 2088 | 4963 | 2950 | 41.41  | 46.13  |
| 10000 | 0.92 | 0.4500 | 0.5500 | 2025 | 4554 | 3025 | 16.34  | 0.4431 | 0.4569 | 0.5431 | 0.5569 | 1963 | 4935 | 3101 | 2088 | 4963 | 2950 | 33.26  | 37.48  |
| 10000 | 0.93 | 0.4500 | 0.5500 | 2025 | 4604 | 3025 | 12.45  | 0.4431 | 0.4569 | 0.5431 | 0.5569 | 1963 | 4935 | 3101 | 2088 | 4963 | 2950 | 26.11  | 29.82  |
| 10000 | 0.94 | 0.4500 | 0.5500 | 2025 | 4653 | 3025 | 9.10   | 0.4431 | 0.4569 | 0.5431 | 0.5569 | 1963 | 4935 | 3101 | 2088 | 4963 | 2950 | 19.95  | 23.14  |
| 10000 | 0.95 | 0.4500 | 0.5500 | 2025 | 4703 | 3025 | 6.28   | 0.4431 | 0.4569 | 0.5431 | 0.5569 | 1963 | 4935 | 3101 | 2088 | 4963 | 2950 | 14.79  | 17.46  |
| 10000 | 0.96 | 0.4500 | 0.5500 | 2025 | 4752 | 3025 | 4.00   | 0.4431 | 0.4569 | 0.5431 | 0.5569 | 1963 | 4935 | 3101 | 2088 | 4963 | 2950 | 10.61  | 12.76  |
| 10000 | 0.97 | 0.4500 | 0.5500 | 2025 | 4802 | 3025 | 2.24   | 0.4431 | 0.4569 | 0.5431 | 0.5569 | 1963 | 4935 | 3101 | 2088 | 4963 | 2950 | 7.43   | 9.04   |
| 10000 | 0.98 | 0.4500 | 0.5500 | 2025 | 4851 | 3025 | 0.99   | 0.4431 | 0.4569 | 0.5431 | 0.5569 | 1963 | 4935 | 3101 | 2088 | 4963 | 2950 | 5.25   | 6.32   |
| 10000 | 0.99 | 0.4500 | 0.5500 | 2025 | 4901 | 3025 | 0.25   | 0.4431 | 0.4569 | 0.5431 | 0.5569 | 1963 | 4935 | 3101 | 2088 | 4963 | 2950 | 4.05   | 4.58   |
| 10000 | 1.00 | 0.4500 | 0.5500 | 2025 | 4950 | 3025 | 0.00   | 0.4431 | 0.4569 | 0.5431 | 0.5569 | 1963 | 4935 | 3101 | 2088 | 4963 | 2950 | 3.85   | 3.83   |
| 10000 | 1.01 | 0.4500 | 0.5500 | 2025 | 5000 | 3025 | 0.24   | 0.4431 | 0.4569 | 0.5431 | 0.5569 | 1963 | 4935 | 3101 | 2088 | 4963 | 2950 | 4.65   | 4.07   |
| 10000 | 1.02 | 0.4500 | 0.5500 | 2025 | 5049 | 3025 | 0.97   | 0.4431 | 0.4569 | 0.5431 | 0.5569 | 1963 | 4935 | 3101 | 2088 | 4963 | 2950 | 6.43   | 5.29   |
| 10000 | 1.03 | 0.4500 | 0.5500 | 2025 | 5099 | 3025 | 2.17   | 0.4431 | 0.4569 | 0.5431 | 0.5569 | 1963 | 4935 | 3101 | 2088 | 4963 | 2950 | 9.21   | 7.51   |
| 10000 | 1.04 | 0.4500 | 0.5500 | 2025 | 5148 | 3025 | 3.84   | 0.4431 | 0.4569 | 0.5431 | 0.5569 | 1963 | 4935 | 3101 | 2088 | 4963 | 2950 | 12.98  | 10.71  |
| 10000 | 1.05 | 0.4500 | 0.5500 | 2025 | 5198 | 3025 | 5.97   | 0.4431 | 0.4569 | 0.5431 | 0.5569 | 1963 | 4935 | 3101 | 2088 | 4963 | 2950 | 17.74  | 14.89  |
| 10000 | 1.06 | 0.4500 | 0.5500 | 2025 | 5247 | 3025 | 8.56   | 0.4431 | 0.4569 | 0.5431 | 0.5569 | 1963 | 4935 | 3101 | 2088 | 4963 | 2950 | 23.50  | 20.07  |
| 10000 | 1.07 | 0.4500 | 0.5500 | 2025 | 5297 | 3025 | 11.60  | 0.4431 | 0.4569 | 0.5431 | 0.5569 | 1963 | 4935 | 3101 | 2088 | 4963 | 2950 | 30.25  | 26.23  |
| 10000 | 1.08 | 0.4500 | 0.5500 | 2025 | 5346 | 3025 | 15.07  | 0.4431 | 0.4569 | 0.5431 | 0.5569 | 1963 | 4935 | 3101 | 2088 | 4963 | 2950 | 37.99  | 33.38  |
| 10000 | 1.09 | 0.4500 | 0.5500 | 2025 | 5396 | 3025 | 18.98  | 0.4431 | 0.4569 | 0.5431 | 0.5569 | 1963 | 4935 | 3101 | 2088 | 4963 | 2950 | 46.73  | 41.52  |
| 10000 | 1.10 | 0.4500 | 0.5500 | 2025 | 5445 | 3025 | 23.33  | 0.4431 | 0.4569 | 0.5431 | 0.5569 | 1963 | 4935 | 3101 | 2088 | 4963 | 2950 | 56.46  | 50.64  |
| 10000 | 1.11 | 0.4500 | 0.5500 | 2025 | 5495 | 3025 | 28.09  | 0.4431 | 0.4569 | 0.5431 | 0.5569 | 1963 | 4935 | 3101 | 2088 | 4963 | 2950 | 67.18  | 60.75  |
| 10000 | 1.12 | 0.4500 | 0.5500 | 2025 | 5544 | 3025 | 33.27  | 0.4431 | 0.4569 | 0.5431 | 0.5569 | 1963 | 4935 | 3101 | 2088 | 4963 | 2950 | 78.89  | 71.85  |
| 10000 | 1.13 | 0.4500 | 0.5500 | 2025 | 5594 | 3025 | 38.86  | 0.4431 | 0.4569 | 0.5431 | 0.5569 | 1963 | 4935 | 3101 | 2088 | 4963 | 2950 | 91.60  | 83.94  |

|       |      |        |        |      |      |      |        |        |        |        |        |      |      |      |      |      |      |        |        |
|-------|------|--------|--------|------|------|------|--------|--------|--------|--------|--------|------|------|------|------|------|------|--------|--------|
| 10000 | 1.14 | 0.4500 | 0.5500 | 2025 | 5643 | 3025 | 44.86  | 0.4431 | 0.4569 | 0.5431 | 0.5569 | 1963 | 4935 | 3101 | 2088 | 4963 | 2950 | 105.30 | 97.02  |
| 10000 | 1.15 | 0.4500 | 0.5500 | 2025 | 5693 | 3025 | 51.25  | 0.4431 | 0.4569 | 0.5431 | 0.5569 | 1963 | 4935 | 3101 | 2088 | 4963 | 2950 | 120.00 | 111.08 |
| 10000 | 1.16 | 0.4500 | 0.5500 | 2025 | 5742 | 3025 | 58.04  | 0.4431 | 0.4569 | 0.5431 | 0.5569 | 1963 | 4935 | 3101 | 2088 | 4963 | 2950 | 135.68 | 126.13 |
| 10000 | 1.17 | 0.4500 | 0.5500 | 2025 | 5792 | 3025 | 65.22  | 0.4431 | 0.4569 | 0.5431 | 0.5569 | 1963 | 4935 | 3101 | 2088 | 4963 | 2950 | 152.36 | 142.16 |
| 10000 | 1.18 | 0.4500 | 0.5500 | 2025 | 5841 | 3025 | 72.78  | 0.4431 | 0.4569 | 0.5431 | 0.5569 | 1963 | 4935 | 3101 | 2088 | 4963 | 2950 | 170.03 | 159.19 |
| 10000 | 1.19 | 0.4500 | 0.5500 | 2025 | 5891 | 3025 | 80.72  | 0.4431 | 0.4569 | 0.5431 | 0.5569 | 1963 | 4935 | 3101 | 2088 | 4963 | 2950 | 188.70 | 177.20 |
| 10000 | 1.20 | 0.4500 | 0.5500 | 2025 | 5940 | 3025 | 89.03  | 0.4431 | 0.4569 | 0.5431 | 0.5569 | 1963 | 4935 | 3101 | 2088 | 4963 | 2950 | 208.36 | 196.20 |
| 10000 | 0.80 | 0.5000 | 0.5000 | 2500 | 4000 | 2500 | 111.11 | 0.4931 | 0.5069 | 0.4931 | 0.5069 | 2431 | 4999 | 2570 | 2570 | 4999 | 2431 | 203.50 | 203.50 |
| 10000 | 0.81 | 0.5000 | 0.5000 | 2500 | 4050 | 2500 | 99.72  | 0.4931 | 0.5069 | 0.4931 | 0.5069 | 2431 | 4999 | 2570 | 2570 | 4999 | 2431 | 184.01 | 184.01 |
| 10000 | 0.82 | 0.5000 | 0.5000 | 2500 | 4100 | 2500 | 89.01  | 0.4931 | 0.5069 | 0.4931 | 0.5069 | 2431 | 4999 | 2570 | 2570 | 4999 | 2431 | 165.53 | 165.53 |
| 10000 | 0.83 | 0.5000 | 0.5000 | 2500 | 4150 | 2500 | 78.96  | 0.4931 | 0.5069 | 0.4931 | 0.5069 | 2431 | 4999 | 2570 | 2570 | 4999 | 2431 | 148.04 | 148.04 |
| 10000 | 0.84 | 0.5000 | 0.5000 | 2500 | 4200 | 2500 | 69.57  | 0.4931 | 0.5069 | 0.4931 | 0.5069 | 2431 | 4999 | 2570 | 2570 | 4999 | 2431 | 131.56 | 131.56 |
| 10000 | 0.85 | 0.5000 | 0.5000 | 2500 | 4250 | 2500 | 60.81  | 0.4931 | 0.5069 | 0.4931 | 0.5069 | 2431 | 4999 | 2570 | 2570 | 4999 | 2431 | 116.08 | 116.08 |
| 10000 | 0.86 | 0.5000 | 0.5000 | 2500 | 4300 | 2500 | 52.69  | 0.4931 | 0.5069 | 0.4931 | 0.5069 | 2431 | 4999 | 2570 | 2570 | 4999 | 2431 | 101.59 | 101.59 |
| 10000 | 0.87 | 0.5000 | 0.5000 | 2500 | 4350 | 2500 | 45.19  | 0.4931 | 0.5069 | 0.4931 | 0.5069 | 2431 | 4999 | 2570 | 2570 | 4999 | 2431 | 88.11  | 88.11  |
| 10000 | 0.88 | 0.5000 | 0.5000 | 2500 | 4400 | 2500 | 38.30  | 0.4931 | 0.5069 | 0.4931 | 0.5069 | 2431 | 4999 | 2570 | 2570 | 4999 | 2431 | 75.63  | 75.63  |
| 10000 | 0.89 | 0.5000 | 0.5000 | 2500 | 4450 | 2500 | 32.01  | 0.4931 | 0.5069 | 0.4931 | 0.5069 | 2431 | 4999 | 2570 | 2570 | 4999 | 2431 | 64.14  | 64.14  |
| 10000 | 0.90 | 0.5000 | 0.5000 | 2500 | 4500 | 2500 | 26.32  | 0.4931 | 0.5069 | 0.4931 | 0.5069 | 2431 | 4999 | 2570 | 2570 | 4999 | 2431 | 53.66  | 53.66  |
| 10000 | 0.91 | 0.5000 | 0.5000 | 2500 | 4550 | 2500 | 21.20  | 0.4931 | 0.5069 | 0.4931 | 0.5069 | 2431 | 4999 | 2570 | 2570 | 4999 | 2431 | 44.18  | 44.18  |
| 10000 | 0.92 | 0.5000 | 0.5000 | 2500 | 4600 | 2500 | 16.67  | 0.4931 | 0.5069 | 0.4931 | 0.5069 | 2431 | 4999 | 2570 | 2570 | 4999 | 2431 | 35.70  | 35.70  |
| 10000 | 0.93 | 0.5000 | 0.5000 | 2500 | 4650 | 2500 | 12.69  | 0.4931 | 0.5069 | 0.4931 | 0.5069 | 2431 | 4999 | 2570 | 2570 | 4999 | 2431 | 28.21  | 28.21  |
| 10000 | 0.94 | 0.5000 | 0.5000 | 2500 | 4700 | 2500 | 9.28   | 0.4931 | 0.5069 | 0.4931 | 0.5069 | 2431 | 4999 | 2570 | 2570 | 4999 | 2431 | 21.73  | 21.73  |
| 10000 | 0.95 | 0.5000 | 0.5000 | 2500 | 4750 | 2500 | 6.41   | 0.4931 | 0.5069 | 0.4931 | 0.5069 | 2431 | 4999 | 2570 | 2570 | 4999 | 2431 | 16.25  | 16.25  |
| 10000 | 0.96 | 0.5000 | 0.5000 | 2500 | 4800 | 2500 | 4.08   | 0.4931 | 0.5069 | 0.4931 | 0.5069 | 2431 | 4999 | 2570 | 2570 | 4999 | 2431 | 11.77  | 11.77  |
| 10000 | 0.97 | 0.5000 | 0.5000 | 2500 | 4850 | 2500 | 2.28   | 0.4931 | 0.5069 | 0.4931 | 0.5069 | 2431 | 4999 | 2570 | 2570 | 4999 | 2431 | 8.29   | 8.29   |
| 10000 | 0.98 | 0.5000 | 0.5000 | 2500 | 4900 | 2500 | 1.01   | 0.4931 | 0.5069 | 0.4931 | 0.5069 | 2431 | 4999 | 2570 | 2570 | 4999 | 2431 | 5.80   | 5.80   |
| 10000 | 0.99 | 0.5000 | 0.5000 | 2500 | 4950 | 2500 | 0.25   | 0.4931 | 0.5069 | 0.4931 | 0.5069 | 2431 | 4999 | 2570 | 2570 | 4999 | 2431 | 4.32   | 4.32   |
| 10000 | 1.00 | 0.5000 | 0.5000 | 2500 | 5000 | 2500 | 0.00   | 0.4931 | 0.5069 | 0.4931 | 0.5069 | 2431 | 4999 | 2570 | 2570 | 4999 | 2431 | 3.84   | 3.84   |
| 10000 | 1.01 | 0.5000 | 0.5000 | 2500 | 5050 | 2500 | 0.25   | 0.4931 | 0.5069 | 0.4931 | 0.5069 | 2431 | 4999 | 2570 | 2570 | 4999 | 2431 | 4.36   | 4.36   |
| 10000 | 1.02 | 0.5000 | 0.5000 | 2500 | 5100 | 2500 | 0.99   | 0.4931 | 0.5069 | 0.4931 | 0.5069 | 2431 | 4999 | 2570 | 2570 | 4999 | 2431 | 5.88   | 5.88   |
| 10000 | 1.03 | 0.5000 | 0.5000 | 2500 | 5150 | 2500 | 2.22   | 0.4931 | 0.5069 | 0.4931 | 0.5069 | 2431 | 4999 | 2570 | 2570 | 4999 | 2431 | 8.40   | 8.40   |
| 10000 | 1.04 | 0.5000 | 0.5000 | 2500 | 5200 | 2500 | 3.92   | 0.4931 | 0.5069 | 0.4931 | 0.5069 | 2431 | 4999 | 2570 | 2570 | 4999 | 2431 | 11.92  | 11.92  |
| 10000 | 1.05 | 0.5000 | 0.5000 | 2500 | 5250 | 2500 | 6.10   | 0.4931 | 0.5069 | 0.4931 | 0.5069 | 2431 | 4999 | 2570 | 2570 | 4999 | 2431 | 16.44  | 16.44  |
| 10000 | 1.06 | 0.5000 | 0.5000 | 2500 | 5300 | 2500 | 8.74   | 0.4931 | 0.5069 | 0.4931 | 0.5069 | 2431 | 4999 | 2570 | 2570 | 4999 | 2431 | 21.96  | 21.96  |
| 10000 | 1.07 | 0.5000 | 0.5000 | 2500 | 5350 | 2500 | 11.84  | 0.4931 | 0.5069 | 0.4931 | 0.5069 | 2431 | 4999 | 2570 | 2570 | 4999 | 2431 | 28.48  | 28.48  |

|       |      |        |        |      |      |      |        |        |        |        |        |      |      |      |      |      |      |        |        |
|-------|------|--------|--------|------|------|------|--------|--------|--------|--------|--------|------|------|------|------|------|------|--------|--------|
| 10000 | 1.08 | 0.5000 | 0.5000 | 2500 | 5400 | 2500 | 15.38  | 0.4931 | 0.5069 | 0.4931 | 0.5069 | 2431 | 4999 | 2570 | 2570 | 4999 | 2431 | 36.00  | 36.00  |
| 10000 | 1.09 | 0.5000 | 0.5000 | 2500 | 5450 | 2500 | 19.38  | 0.4931 | 0.5069 | 0.4931 | 0.5069 | 2431 | 4999 | 2570 | 2570 | 4999 | 2431 | 44.52  | 44.52  |
| 10000 | 1.10 | 0.5000 | 0.5000 | 2500 | 5500 | 2500 | 23.81  | 0.4931 | 0.5069 | 0.4931 | 0.5069 | 2431 | 4999 | 2570 | 2570 | 4999 | 2431 | 54.04  | 54.04  |
| 10000 | 1.11 | 0.5000 | 0.5000 | 2500 | 5550 | 2500 | 28.67  | 0.4931 | 0.5069 | 0.4931 | 0.5069 | 2431 | 4999 | 2570 | 2570 | 4999 | 2431 | 64.57  | 64.57  |
| 10000 | 1.12 | 0.5000 | 0.5000 | 2500 | 5600 | 2500 | 33.96  | 0.4931 | 0.5069 | 0.4931 | 0.5069 | 2431 | 4999 | 2570 | 2570 | 4999 | 2431 | 76.09  | 76.09  |
| 10000 | 1.13 | 0.5000 | 0.5000 | 2500 | 5650 | 2500 | 39.67  | 0.4931 | 0.5069 | 0.4931 | 0.5069 | 2431 | 4999 | 2570 | 2570 | 4999 | 2431 | 88.61  | 88.61  |
| 10000 | 1.14 | 0.5000 | 0.5000 | 2500 | 5700 | 2500 | 45.79  | 0.4931 | 0.5069 | 0.4931 | 0.5069 | 2431 | 4999 | 2570 | 2570 | 4999 | 2431 | 102.13 | 102.13 |
| 10000 | 1.15 | 0.5000 | 0.5000 | 2500 | 5750 | 2500 | 52.33  | 0.4931 | 0.5069 | 0.4931 | 0.5069 | 2431 | 4999 | 2570 | 2570 | 4999 | 2431 | 116.65 | 116.65 |
| 10000 | 1.16 | 0.5000 | 0.5000 | 2500 | 5800 | 2500 | 59.26  | 0.4931 | 0.5069 | 0.4931 | 0.5069 | 2431 | 4999 | 2570 | 2570 | 4999 | 2431 | 132.17 | 132.17 |
| 10000 | 1.17 | 0.5000 | 0.5000 | 2500 | 5850 | 2500 | 66.59  | 0.4931 | 0.5069 | 0.4931 | 0.5069 | 2431 | 4999 | 2570 | 2570 | 4999 | 2431 | 148.70 | 148.70 |
| 10000 | 1.18 | 0.5000 | 0.5000 | 2500 | 5900 | 2500 | 74.31  | 0.4931 | 0.5069 | 0.4931 | 0.5069 | 2431 | 4999 | 2570 | 2570 | 4999 | 2431 | 166.22 | 166.22 |
| 10000 | 1.19 | 0.5000 | 0.5000 | 2500 | 5950 | 2500 | 82.42  | 0.4931 | 0.5069 | 0.4931 | 0.5069 | 2431 | 4999 | 2570 | 2570 | 4999 | 2431 | 184.74 | 184.74 |
| 10000 | 1.20 | 0.5000 | 0.5000 | 2500 | 6000 | 2500 | 90.91  | 0.4931 | 0.5069 | 0.4931 | 0.5069 | 2431 | 4999 | 2570 | 2570 | 4999 | 2431 | 204.27 | 204.27 |
| 10000 | 0.80 | 0.5500 | 0.4500 | 3025 | 3960 | 2025 | 109.05 | 0.5431 | 0.5569 | 0.4431 | 0.4569 | 2950 | 4963 | 2088 | 3101 | 4935 | 1963 | 206.44 | 196.53 |
| 10000 | 0.81 | 0.5500 | 0.4500 | 3025 | 4010 | 2025 | 97.86  | 0.5431 | 0.5569 | 0.4431 | 0.4569 | 2950 | 4963 | 2088 | 3101 | 4935 | 1963 | 186.93 | 177.46 |
| 10000 | 0.82 | 0.5500 | 0.4500 | 3025 | 4059 | 2025 | 87.34  | 0.5431 | 0.5569 | 0.4431 | 0.4569 | 2950 | 4963 | 2088 | 3101 | 4935 | 1963 | 168.41 | 159.39 |
| 10000 | 0.83 | 0.5500 | 0.4500 | 3025 | 4109 | 2025 | 77.48  | 0.5431 | 0.5569 | 0.4431 | 0.4569 | 2950 | 4963 | 2088 | 3101 | 4935 | 1963 | 150.87 | 142.31 |
| 10000 | 0.84 | 0.5500 | 0.4500 | 3025 | 4158 | 2025 | 68.25  | 0.5431 | 0.5569 | 0.4431 | 0.4569 | 2950 | 4963 | 2088 | 3101 | 4935 | 1963 | 134.32 | 126.22 |
| 10000 | 0.85 | 0.5500 | 0.4500 | 3025 | 4208 | 2025 | 59.66  | 0.5431 | 0.5569 | 0.4431 | 0.4569 | 2950 | 4963 | 2088 | 3101 | 4935 | 1963 | 118.76 | 111.13 |
| 10000 | 0.86 | 0.5500 | 0.4500 | 3025 | 4257 | 2025 | 51.68  | 0.5431 | 0.5569 | 0.4431 | 0.4569 | 2950 | 4963 | 2088 | 3101 | 4935 | 1963 | 104.19 | 97.02  |
| 10000 | 0.87 | 0.5500 | 0.4500 | 3025 | 4307 | 2025 | 44.32  | 0.5431 | 0.5569 | 0.4431 | 0.4569 | 2950 | 4963 | 2088 | 3101 | 4935 | 1963 | 90.60  | 83.91  |
| 10000 | 0.88 | 0.5500 | 0.4500 | 3025 | 4356 | 2025 | 37.56  | 0.5431 | 0.5569 | 0.4431 | 0.4569 | 2950 | 4963 | 2088 | 3101 | 4935 | 1963 | 78.00  | 71.80  |
| 10000 | 0.89 | 0.5500 | 0.4500 | 3025 | 4406 | 2025 | 31.39  | 0.5431 | 0.5569 | 0.4431 | 0.4569 | 2950 | 4963 | 2088 | 3101 | 4935 | 1963 | 66.39  | 60.67  |
| 10000 | 0.90 | 0.5500 | 0.4500 | 3025 | 4455 | 2025 | 25.81  | 0.5431 | 0.5569 | 0.4431 | 0.4569 | 2950 | 4963 | 2088 | 3101 | 4935 | 1963 | 55.77  | 50.54  |
| 10000 | 0.91 | 0.5500 | 0.4500 | 3025 | 4505 | 2025 | 20.79  | 0.5431 | 0.5569 | 0.4431 | 0.4569 | 2950 | 4963 | 2088 | 3101 | 4935 | 1963 | 46.13  | 41.41  |
| 10000 | 0.92 | 0.5500 | 0.4500 | 3025 | 4554 | 2025 | 16.34  | 0.5431 | 0.5569 | 0.4431 | 0.4569 | 2950 | 4963 | 2088 | 3101 | 4935 | 1963 | 37.48  | 33.26  |
| 10000 | 0.93 | 0.5500 | 0.4500 | 3025 | 4604 | 2025 | 12.45  | 0.5431 | 0.5569 | 0.4431 | 0.4569 | 2950 | 4963 | 2088 | 3101 | 4935 | 1963 | 29.82  | 26.11  |
| 10000 | 0.94 | 0.5500 | 0.4500 | 3025 | 4653 | 2025 | 9.10   | 0.5431 | 0.5569 | 0.4431 | 0.4569 | 2950 | 4963 | 2088 | 3101 | 4935 | 1963 | 23.14  | 19.95  |
| 10000 | 0.95 | 0.5500 | 0.4500 | 3025 | 4703 | 2025 | 6.28   | 0.5431 | 0.5569 | 0.4431 | 0.4569 | 2950 | 4963 | 2088 | 3101 | 4935 | 1963 | 17.46  | 14.79  |
| 10000 | 0.96 | 0.5500 | 0.4500 | 3025 | 4752 | 2025 | 4.00   | 0.5431 | 0.5569 | 0.4431 | 0.4569 | 2950 | 4963 | 2088 | 3101 | 4935 | 1963 | 12.76  | 10.61  |
| 10000 | 0.97 | 0.5500 | 0.4500 | 3025 | 4802 | 2025 | 2.24   | 0.5431 | 0.5569 | 0.4431 | 0.4569 | 2950 | 4963 | 2088 | 3101 | 4935 | 1963 | 9.04   | 7.43   |
| 10000 | 0.98 | 0.5500 | 0.4500 | 3025 | 4851 | 2025 | 0.99   | 0.5431 | 0.5569 | 0.4431 | 0.4569 | 2950 | 4963 | 2088 | 3101 | 4935 | 1963 | 6.32   | 5.25   |
| 10000 | 0.99 | 0.5500 | 0.4500 | 3025 | 4901 | 2025 | 0.25   | 0.5431 | 0.5569 | 0.4431 | 0.4569 | 2950 | 4963 | 2088 | 3101 | 4935 | 1963 | 4.58   | 4.05   |
| 10000 | 1.00 | 0.5500 | 0.4500 | 3025 | 4950 | 2025 | 0.00   | 0.5431 | 0.5569 | 0.4431 | 0.4569 | 2950 | 4963 | 2088 | 3101 | 4935 | 1963 | 3.83   | 3.85   |
| 10000 | 1.01 | 0.5500 | 0.4500 | 3025 | 5000 | 2025 | 0.24   | 0.5431 | 0.5569 | 0.4431 | 0.4569 | 2950 | 4963 | 2088 | 3101 | 4935 | 1963 | 4.07   | 4.65   |

|       |      |        |        |      |      |      |        |        |        |        |        |      |      |      |      |      |      |        |        |
|-------|------|--------|--------|------|------|------|--------|--------|--------|--------|--------|------|------|------|------|------|------|--------|--------|
| 10000 | 1.02 | 0.5500 | 0.4500 | 3025 | 5049 | 2025 | 0.97   | 0.5431 | 0.5569 | 0.4431 | 0.4569 | 2950 | 4963 | 2088 | 3101 | 4935 | 1963 | 5.29   | 6.43   |
| 10000 | 1.03 | 0.5500 | 0.4500 | 3025 | 5099 | 2025 | 2.17   | 0.5431 | 0.5569 | 0.4431 | 0.4569 | 2950 | 4963 | 2088 | 3101 | 4935 | 1963 | 7.51   | 9.21   |
| 10000 | 1.04 | 0.5500 | 0.4500 | 3025 | 5148 | 2025 | 3.84   | 0.5431 | 0.5569 | 0.4431 | 0.4569 | 2950 | 4963 | 2088 | 3101 | 4935 | 1963 | 10.71  | 12.98  |
| 10000 | 1.05 | 0.5500 | 0.4500 | 3025 | 5198 | 2025 | 5.97   | 0.5431 | 0.5569 | 0.4431 | 0.4569 | 2950 | 4963 | 2088 | 3101 | 4935 | 1963 | 14.89  | 17.74  |
| 10000 | 1.06 | 0.5500 | 0.4500 | 3025 | 5247 | 2025 | 8.56   | 0.5431 | 0.5569 | 0.4431 | 0.4569 | 2950 | 4963 | 2088 | 3101 | 4935 | 1963 | 20.07  | 23.50  |
| 10000 | 1.07 | 0.5500 | 0.4500 | 3025 | 5297 | 2025 | 11.60  | 0.5431 | 0.5569 | 0.4431 | 0.4569 | 2950 | 4963 | 2088 | 3101 | 4935 | 1963 | 26.23  | 30.25  |
| 10000 | 1.08 | 0.5500 | 0.4500 | 3025 | 5346 | 2025 | 15.07  | 0.5431 | 0.5569 | 0.4431 | 0.4569 | 2950 | 4963 | 2088 | 3101 | 4935 | 1963 | 33.38  | 37.99  |
| 10000 | 1.09 | 0.5500 | 0.4500 | 3025 | 5396 | 2025 | 18.98  | 0.5431 | 0.5569 | 0.4431 | 0.4569 | 2950 | 4963 | 2088 | 3101 | 4935 | 1963 | 41.52  | 46.73  |
| 10000 | 1.10 | 0.5500 | 0.4500 | 3025 | 5445 | 2025 | 23.33  | 0.5431 | 0.5569 | 0.4431 | 0.4569 | 2950 | 4963 | 2088 | 3101 | 4935 | 1963 | 50.64  | 56.46  |
| 10000 | 1.11 | 0.5500 | 0.4500 | 3025 | 5495 | 2025 | 28.09  | 0.5431 | 0.5569 | 0.4431 | 0.4569 | 2950 | 4963 | 2088 | 3101 | 4935 | 1963 | 60.75  | 67.18  |
| 10000 | 1.12 | 0.5500 | 0.4500 | 3025 | 5544 | 2025 | 33.27  | 0.5431 | 0.5569 | 0.4431 | 0.4569 | 2950 | 4963 | 2088 | 3101 | 4935 | 1963 | 71.85  | 78.89  |
| 10000 | 1.13 | 0.5500 | 0.4500 | 3025 | 5594 | 2025 | 38.86  | 0.5431 | 0.5569 | 0.4431 | 0.4569 | 2950 | 4963 | 2088 | 3101 | 4935 | 1963 | 83.94  | 91.60  |
| 10000 | 1.14 | 0.5500 | 0.4500 | 3025 | 5643 | 2025 | 44.86  | 0.5431 | 0.5569 | 0.4431 | 0.4569 | 2950 | 4963 | 2088 | 3101 | 4935 | 1963 | 97.02  | 105.30 |
| 10000 | 1.15 | 0.5500 | 0.4500 | 3025 | 5693 | 2025 | 51.25  | 0.5431 | 0.5569 | 0.4431 | 0.4569 | 2950 | 4963 | 2088 | 3101 | 4935 | 1963 | 111.08 | 120.00 |
| 10000 | 1.16 | 0.5500 | 0.4500 | 3025 | 5742 | 2025 | 58.04  | 0.5431 | 0.5569 | 0.4431 | 0.4569 | 2950 | 4963 | 2088 | 3101 | 4935 | 1963 | 126.13 | 135.68 |
| 10000 | 1.17 | 0.5500 | 0.4500 | 3025 | 5792 | 2025 | 65.22  | 0.5431 | 0.5569 | 0.4431 | 0.4569 | 2950 | 4963 | 2088 | 3101 | 4935 | 1963 | 142.16 | 152.36 |
| 10000 | 1.18 | 0.5500 | 0.4500 | 3025 | 5841 | 2025 | 72.78  | 0.5431 | 0.5569 | 0.4431 | 0.4569 | 2950 | 4963 | 2088 | 3101 | 4935 | 1963 | 159.19 | 170.03 |
| 10000 | 1.19 | 0.5500 | 0.4500 | 3025 | 5891 | 2025 | 80.72  | 0.5431 | 0.5569 | 0.4431 | 0.4569 | 2950 | 4963 | 2088 | 3101 | 4935 | 1963 | 177.20 | 188.70 |
| 10000 | 1.20 | 0.5500 | 0.4500 | 3025 | 5940 | 2025 | 89.03  | 0.5431 | 0.5569 | 0.4431 | 0.4569 | 2950 | 4963 | 2088 | 3101 | 4935 | 1963 | 196.20 | 208.36 |
| 10000 | 0.80 | 0.6000 | 0.4000 | 3600 | 3840 | 1600 | 102.96 | 0.5932 | 0.6068 | 0.3932 | 0.4068 | 3519 | 4826 | 1655 | 3682 | 4772 | 1546 | 205.21 | 185.70 |
| 10000 | 0.81 | 0.6000 | 0.4000 | 3600 | 3888 | 1600 | 92.37  | 0.5932 | 0.6068 | 0.3932 | 0.4068 | 3519 | 4826 | 1655 | 3682 | 4772 | 1546 | 186.07 | 167.43 |
| 10000 | 0.82 | 0.6000 | 0.4000 | 3600 | 3936 | 1600 | 82.42  | 0.5932 | 0.6068 | 0.3932 | 0.4068 | 3519 | 4826 | 1655 | 3682 | 4772 | 1546 | 167.89 | 150.13 |
| 10000 | 0.83 | 0.6000 | 0.4000 | 3600 | 3984 | 1600 | 73.09  | 0.5932 | 0.6068 | 0.3932 | 0.4068 | 3519 | 4826 | 1655 | 3682 | 4772 | 1546 | 150.66 | 133.80 |
| 10000 | 0.84 | 0.6000 | 0.4000 | 3600 | 4032 | 1600 | 64.37  | 0.5932 | 0.6068 | 0.3932 | 0.4068 | 3519 | 4826 | 1655 | 3682 | 4772 | 1546 | 134.38 | 118.43 |
| 10000 | 0.85 | 0.6000 | 0.4000 | 3600 | 4080 | 1600 | 56.25  | 0.5932 | 0.6068 | 0.3932 | 0.4068 | 3519 | 4826 | 1655 | 3682 | 4772 | 1546 | 119.06 | 104.03 |
| 10000 | 0.86 | 0.6000 | 0.4000 | 3600 | 4128 | 1600 | 48.73  | 0.5932 | 0.6068 | 0.3932 | 0.4068 | 3519 | 4826 | 1655 | 3682 | 4772 | 1546 | 104.70 | 90.59  |
| 10000 | 0.87 | 0.6000 | 0.4000 | 3600 | 4176 | 1600 | 41.78  | 0.5932 | 0.6068 | 0.3932 | 0.4068 | 3519 | 4826 | 1655 | 3682 | 4772 | 1546 | 91.28  | 78.12  |
| 10000 | 0.88 | 0.6000 | 0.4000 | 3600 | 4224 | 1600 | 35.40  | 0.5932 | 0.6068 | 0.3932 | 0.4068 | 3519 | 4826 | 1655 | 3682 | 4772 | 1546 | 78.83  | 66.61  |
| 10000 | 0.89 | 0.6000 | 0.4000 | 3600 | 4272 | 1600 | 29.58  | 0.5932 | 0.6068 | 0.3932 | 0.4068 | 3519 | 4826 | 1655 | 3682 | 4772 | 1546 | 67.33  | 56.07  |
| 10000 | 0.90 | 0.6000 | 0.4000 | 3600 | 4320 | 1600 | 24.31  | 0.5932 | 0.6068 | 0.3932 | 0.4068 | 3519 | 4826 | 1655 | 3682 | 4772 | 1546 | 56.78  | 46.50  |
| 10000 | 0.91 | 0.6000 | 0.4000 | 3600 | 4368 | 1600 | 19.58  | 0.5932 | 0.6068 | 0.3932 | 0.4068 | 3519 | 4826 | 1655 | 3682 | 4772 | 1546 | 47.19  | 37.89  |
| 10000 | 0.92 | 0.6000 | 0.4000 | 3600 | 4416 | 1600 | 15.39  | 0.5932 | 0.6068 | 0.3932 | 0.4068 | 3519 | 4826 | 1655 | 3682 | 4772 | 1546 | 38.55  | 30.25  |
| 10000 | 0.93 | 0.6000 | 0.4000 | 3600 | 4464 | 1600 | 11.72  | 0.5932 | 0.6068 | 0.3932 | 0.4068 | 3519 | 4826 | 1655 | 3682 | 4772 | 1546 | 30.87  | 23.57  |
| 10000 | 0.94 | 0.6000 | 0.4000 | 3600 | 4512 | 1600 | 8.56   | 0.5932 | 0.6068 | 0.3932 | 0.4068 | 3519 | 4826 | 1655 | 3682 | 4772 | 1546 | 24.14  | 17.86  |
| 10000 | 0.95 | 0.6000 | 0.4000 | 3600 | 4560 | 1600 | 5.91   | 0.5932 | 0.6068 | 0.3932 | 0.4068 | 3519 | 4826 | 1655 | 3682 | 4772 | 1546 | 18.37  | 13.11  |

|       |      |        |        |      |      |      |       |        |        |        |        |      |      |      |      |      |      |        |        |
|-------|------|--------|--------|------|------|------|-------|--------|--------|--------|--------|------|------|------|------|------|------|--------|--------|
| 10000 | 0.96 | 0.6000 | 0.4000 | 3600 | 4608 | 1600 | 3.76  | 0.5932 | 0.6068 | 0.3932 | 0.4068 | 3519 | 4826 | 1655 | 3682 | 4772 | 1546 | 13.55  | 9.33   |
| 10000 | 0.97 | 0.6000 | 0.4000 | 3600 | 4656 | 1600 | 2.11  | 0.5932 | 0.6068 | 0.3932 | 0.4068 | 3519 | 4826 | 1655 | 3682 | 4772 | 1546 | 9.68   | 6.52   |
| 10000 | 0.98 | 0.6000 | 0.4000 | 3600 | 4704 | 1600 | 0.93  | 0.5932 | 0.6068 | 0.3932 | 0.4068 | 3519 | 4826 | 1655 | 3682 | 4772 | 1546 | 6.77   | 4.67   |
| 10000 | 0.99 | 0.6000 | 0.4000 | 3600 | 4752 | 1600 | 0.23  | 0.5932 | 0.6068 | 0.3932 | 0.4068 | 3519 | 4826 | 1655 | 3682 | 4772 | 1546 | 4.82   | 3.78   |
| 10000 | 1.00 | 0.6000 | 0.4000 | 3600 | 4800 | 1600 | 0.00  | 0.5932 | 0.6068 | 0.3932 | 0.4068 | 3519 | 4826 | 1655 | 3682 | 4772 | 1546 | 3.82   | 3.86   |
| 10000 | 1.01 | 0.6000 | 0.4000 | 3600 | 4848 | 1600 | 0.23  | 0.5932 | 0.6068 | 0.3932 | 0.4068 | 3519 | 4826 | 1655 | 3682 | 4772 | 1546 | 3.78   | 4.91   |
| 10000 | 1.02 | 0.6000 | 0.4000 | 3600 | 4896 | 1600 | 0.91  | 0.5932 | 0.6068 | 0.3932 | 0.4068 | 3519 | 4826 | 1655 | 3682 | 4772 | 1546 | 4.69   | 6.93   |
| 10000 | 1.03 | 0.6000 | 0.4000 | 3600 | 4944 | 1600 | 2.04  | 0.5932 | 0.6068 | 0.3932 | 0.4068 | 3519 | 4826 | 1655 | 3682 | 4772 | 1546 | 6.55   | 9.90   |
| 10000 | 1.04 | 0.6000 | 0.4000 | 3600 | 4992 | 1600 | 3.61  | 0.5932 | 0.6068 | 0.3932 | 0.4068 | 3519 | 4826 | 1655 | 3682 | 4772 | 1546 | 9.37   | 13.85  |
| 10000 | 1.05 | 0.6000 | 0.4000 | 3600 | 5040 | 1600 | 5.61  | 0.5932 | 0.6068 | 0.3932 | 0.4068 | 3519 | 4826 | 1655 | 3682 | 4772 | 1546 | 13.15  | 18.76  |
| 10000 | 1.06 | 0.6000 | 0.4000 | 3600 | 5088 | 1600 | 8.04  | 0.5932 | 0.6068 | 0.3932 | 0.4068 | 3519 | 4826 | 1655 | 3682 | 4772 | 1546 | 17.88  | 24.64  |
| 10000 | 1.07 | 0.6000 | 0.4000 | 3600 | 5136 | 1600 | 10.89 | 0.5932 | 0.6068 | 0.3932 | 0.4068 | 3519 | 4826 | 1655 | 3682 | 4772 | 1546 | 23.56  | 31.48  |
| 10000 | 1.08 | 0.6000 | 0.4000 | 3600 | 5184 | 1600 | 14.16 | 0.5932 | 0.6068 | 0.3932 | 0.4068 | 3519 | 4826 | 1655 | 3682 | 4772 | 1546 | 30.20  | 39.28  |
| 10000 | 1.09 | 0.6000 | 0.4000 | 3600 | 5232 | 1600 | 17.83 | 0.5932 | 0.6068 | 0.3932 | 0.4068 | 3519 | 4826 | 1655 | 3682 | 4772 | 1546 | 37.79  | 48.06  |
| 10000 | 1.10 | 0.6000 | 0.4000 | 3600 | 5280 | 1600 | 21.91 | 0.5932 | 0.6068 | 0.3932 | 0.4068 | 3519 | 4826 | 1655 | 3682 | 4772 | 1546 | 46.34  | 57.80  |
| 10000 | 1.11 | 0.6000 | 0.4000 | 3600 | 5328 | 1600 | 26.38 | 0.5932 | 0.6068 | 0.3932 | 0.4068 | 3519 | 4826 | 1655 | 3682 | 4772 | 1546 | 55.84  | 68.50  |
| 10000 | 1.12 | 0.6000 | 0.4000 | 3600 | 5376 | 1600 | 31.24 | 0.5932 | 0.6068 | 0.3932 | 0.4068 | 3519 | 4826 | 1655 | 3682 | 4772 | 1546 | 66.30  | 80.17  |
| 10000 | 1.13 | 0.6000 | 0.4000 | 3600 | 5424 | 1600 | 36.48 | 0.5932 | 0.6068 | 0.3932 | 0.4068 | 3519 | 4826 | 1655 | 3682 | 4772 | 1546 | 77.72  | 92.81  |
| 10000 | 1.14 | 0.6000 | 0.4000 | 3600 | 5472 | 1600 | 42.11 | 0.5932 | 0.6068 | 0.3932 | 0.4068 | 3519 | 4826 | 1655 | 3682 | 4772 | 1546 | 90.08  | 106.41 |
| 10000 | 1.15 | 0.6000 | 0.4000 | 3600 | 5520 | 1600 | 48.11 | 0.5932 | 0.6068 | 0.3932 | 0.4068 | 3519 | 4826 | 1655 | 3682 | 4772 | 1546 | 103.41 | 120.97 |
| 10000 | 1.16 | 0.6000 | 0.4000 | 3600 | 5568 | 1600 | 54.48 | 0.5932 | 0.6068 | 0.3932 | 0.4068 | 3519 | 4826 | 1655 | 3682 | 4772 | 1546 | 117.68 | 136.51 |
| 10000 | 1.17 | 0.6000 | 0.4000 | 3600 | 5616 | 1600 | 61.21 | 0.5932 | 0.6068 | 0.3932 | 0.4068 | 3519 | 4826 | 1655 | 3682 | 4772 | 1546 | 132.92 | 153.00 |
| 10000 | 1.18 | 0.6000 | 0.4000 | 3600 | 5664 | 1600 | 68.30 | 0.5932 | 0.6068 | 0.3932 | 0.4068 | 3519 | 4826 | 1655 | 3682 | 4772 | 1546 | 149.10 | 170.47 |
| 10000 | 1.19 | 0.6000 | 0.4000 | 3600 | 5712 | 1600 | 75.74 | 0.5932 | 0.6068 | 0.3932 | 0.4068 | 3519 | 4826 | 1655 | 3682 | 4772 | 1546 | 166.24 | 188.90 |
| 10000 | 1.20 | 0.6000 | 0.4000 | 3600 | 5760 | 1600 | 83.53 | 0.5932 | 0.6068 | 0.3932 | 0.4068 | 3519 | 4826 | 1655 | 3682 | 4772 | 1546 | 184.34 | 208.29 |
| 10000 | 0.80 | 0.6500 | 0.3500 | 4225 | 3640 | 1225 | 93.14 | 0.6434 | 0.6566 | 0.3434 | 0.3566 | 4140 | 4589 | 1272 | 4311 | 4509 | 1179 | 199.66 | 171.15 |
| 10000 | 0.81 | 0.6500 | 0.3500 | 4225 | 3686 | 1225 | 83.53 | 0.6434 | 0.6566 | 0.3434 | 0.3566 | 4140 | 4589 | 1272 | 4311 | 4509 | 1179 | 181.29 | 154.07 |
| 10000 | 0.82 | 0.6500 | 0.3500 | 4225 | 3731 | 1225 | 74.50 | 0.6434 | 0.6566 | 0.3434 | 0.3566 | 4140 | 4589 | 1272 | 4311 | 4509 | 1179 | 163.83 | 137.90 |
| 10000 | 0.83 | 0.6500 | 0.3500 | 4225 | 3777 | 1225 | 66.04 | 0.6434 | 0.6566 | 0.3434 | 0.3566 | 4140 | 4589 | 1272 | 4311 | 4509 | 1179 | 147.27 | 122.65 |
| 10000 | 0.84 | 0.6500 | 0.3500 | 4225 | 3822 | 1225 | 58.14 | 0.6434 | 0.6566 | 0.3434 | 0.3566 | 4140 | 4589 | 1272 | 4311 | 4509 | 1179 | 131.61 | 108.32 |
| 10000 | 0.85 | 0.6500 | 0.3500 | 4225 | 3868 | 1225 | 50.78 | 0.6434 | 0.6566 | 0.3434 | 0.3566 | 4140 | 4589 | 1272 | 4311 | 4509 | 1179 | 116.86 | 94.90  |
| 10000 | 0.86 | 0.6500 | 0.3500 | 4225 | 3913 | 1225 | 43.97 | 0.6434 | 0.6566 | 0.3434 | 0.3566 | 4140 | 4589 | 1272 | 4311 | 4509 | 1179 | 103.00 | 82.41  |
| 10000 | 0.87 | 0.6500 | 0.3500 | 4225 | 3959 | 1225 | 37.69 | 0.6434 | 0.6566 | 0.3434 | 0.3566 | 4140 | 4589 | 1272 | 4311 | 4509 | 1179 | 90.05  | 70.83  |
| 10000 | 0.88 | 0.6500 | 0.3500 | 4225 | 4004 | 1225 | 31.92 | 0.6434 | 0.6566 | 0.3434 | 0.3566 | 4140 | 4589 | 1272 | 4311 | 4509 | 1179 | 78.01  | 60.17  |
| 10000 | 0.89 | 0.6500 | 0.3500 | 4225 | 4050 | 1225 | 26.66 | 0.6434 | 0.6566 | 0.3434 | 0.3566 | 4140 | 4589 | 1272 | 4311 | 4509 | 1179 | 66.86  | 50.43  |

|       |      |        |        |      |      |      |       |        |        |        |        |      |      |      |      |      |      |        |        |
|-------|------|--------|--------|------|------|------|-------|--------|--------|--------|--------|------|------|------|------|------|------|--------|--------|
| 10000 | 0.90 | 0.6500 | 0.3500 | 4225 | 4095 | 1225 | 21.91 | 0.6434 | 0.6566 | 0.3434 | 0.3566 | 4140 | 4589 | 1272 | 4311 | 4509 | 1179 | 56.62  | 41.61  |
| 10000 | 0.91 | 0.6500 | 0.3500 | 4225 | 4141 | 1225 | 17.64 | 0.6434 | 0.6566 | 0.3434 | 0.3566 | 4140 | 4589 | 1272 | 4311 | 4509 | 1179 | 47.28  | 33.70  |
| 10000 | 0.92 | 0.6500 | 0.3500 | 4225 | 4186 | 1225 | 13.86 | 0.6434 | 0.6566 | 0.3434 | 0.3566 | 4140 | 4589 | 1272 | 4311 | 4509 | 1179 | 38.84  | 26.71  |
| 10000 | 0.93 | 0.6500 | 0.3500 | 4225 | 4232 | 1225 | 10.55 | 0.6434 | 0.6566 | 0.3434 | 0.3566 | 4140 | 4589 | 1272 | 4311 | 4509 | 1179 | 31.30  | 20.65  |
| 10000 | 0.94 | 0.6500 | 0.3500 | 4225 | 4277 | 1225 | 7.71  | 0.6434 | 0.6566 | 0.3434 | 0.3566 | 4140 | 4589 | 1272 | 4311 | 4509 | 1179 | 24.67  | 15.50  |
| 10000 | 0.95 | 0.6500 | 0.3500 | 4225 | 4323 | 1225 | 5.32  | 0.6434 | 0.6566 | 0.3434 | 0.3566 | 4140 | 4589 | 1272 | 4311 | 4509 | 1179 | 18.93  | 11.26  |
| 10000 | 0.96 | 0.6500 | 0.3500 | 4225 | 4368 | 1225 | 3.39  | 0.6434 | 0.6566 | 0.3434 | 0.3566 | 4140 | 4589 | 1272 | 4311 | 4509 | 1179 | 14.10  | 7.95   |
| 10000 | 0.97 | 0.6500 | 0.3500 | 4225 | 4414 | 1225 | 1.89  | 0.6434 | 0.6566 | 0.3434 | 0.3566 | 4140 | 4589 | 1272 | 4311 | 4509 | 1179 | 10.18  | 5.55   |
| 10000 | 0.98 | 0.6500 | 0.3500 | 4225 | 4459 | 1225 | 0.84  | 0.6434 | 0.6566 | 0.3434 | 0.3566 | 4140 | 4589 | 1272 | 4311 | 4509 | 1179 | 7.15   | 4.08   |
| 10000 | 0.99 | 0.6500 | 0.3500 | 4225 | 4505 | 1225 | 0.21  | 0.6434 | 0.6566 | 0.3434 | 0.3566 | 4140 | 4589 | 1272 | 4311 | 4509 | 1179 | 5.03   | 3.52   |
| 10000 | 1.00 | 0.6500 | 0.3500 | 4225 | 4550 | 1225 | 0.00  | 0.6434 | 0.6566 | 0.3434 | 0.3566 | 4140 | 4589 | 1272 | 4311 | 4509 | 1179 | 3.81   | 3.88   |
| 10000 | 1.01 | 0.6500 | 0.3500 | 4225 | 4596 | 1225 | 0.21  | 0.6434 | 0.6566 | 0.3434 | 0.3566 | 4140 | 4589 | 1272 | 4311 | 4509 | 1179 | 3.49   | 5.15   |
| 10000 | 1.02 | 0.6500 | 0.3500 | 4225 | 4641 | 1225 | 0.82  | 0.6434 | 0.6566 | 0.3434 | 0.3566 | 4140 | 4589 | 1272 | 4311 | 4509 | 1179 | 4.08   | 7.35   |
| 10000 | 1.03 | 0.6500 | 0.3500 | 4225 | 4687 | 1225 | 1.83  | 0.6434 | 0.6566 | 0.3434 | 0.3566 | 4140 | 4589 | 1272 | 4311 | 4509 | 1179 | 5.56   | 10.46  |
| 10000 | 1.04 | 0.6500 | 0.3500 | 4225 | 4732 | 1225 | 3.24  | 0.6434 | 0.6566 | 0.3434 | 0.3566 | 4140 | 4589 | 1272 | 4311 | 4509 | 1179 | 7.95   | 14.49  |
| 10000 | 1.05 | 0.6500 | 0.3500 | 4225 | 4778 | 1225 | 5.04  | 0.6434 | 0.6566 | 0.3434 | 0.3566 | 4140 | 4589 | 1272 | 4311 | 4509 | 1179 | 11.24  | 19.44  |
| 10000 | 1.06 | 0.6500 | 0.3500 | 4225 | 4823 | 1225 | 7.22  | 0.6434 | 0.6566 | 0.3434 | 0.3566 | 4140 | 4589 | 1272 | 4311 | 4509 | 1179 | 15.44  | 25.31  |
| 10000 | 1.07 | 0.6500 | 0.3500 | 4225 | 4869 | 1225 | 9.77  | 0.6434 | 0.6566 | 0.3434 | 0.3566 | 4140 | 4589 | 1272 | 4311 | 4509 | 1179 | 20.53  | 32.10  |
| 10000 | 1.08 | 0.6500 | 0.3500 | 4225 | 4914 | 1225 | 12.70 | 0.6434 | 0.6566 | 0.3434 | 0.3566 | 4140 | 4589 | 1272 | 4311 | 4509 | 1179 | 26.53  | 39.80  |
| 10000 | 1.09 | 0.6500 | 0.3500 | 4225 | 4960 | 1225 | 15.99 | 0.6434 | 0.6566 | 0.3434 | 0.3566 | 4140 | 4589 | 1272 | 4311 | 4509 | 1179 | 33.43  | 48.43  |
| 10000 | 1.10 | 0.6500 | 0.3500 | 4225 | 5005 | 1225 | 19.64 | 0.6434 | 0.6566 | 0.3434 | 0.3566 | 4140 | 4589 | 1272 | 4311 | 4509 | 1179 | 41.23  | 57.97  |
| 10000 | 1.11 | 0.6500 | 0.3500 | 4225 | 5051 | 1225 | 23.64 | 0.6434 | 0.6566 | 0.3434 | 0.3566 | 4140 | 4589 | 1272 | 4311 | 4509 | 1179 | 49.94  | 68.42  |
| 10000 | 1.12 | 0.6500 | 0.3500 | 4225 | 5096 | 1225 | 28.00 | 0.6434 | 0.6566 | 0.3434 | 0.3566 | 4140 | 4589 | 1272 | 4311 | 4509 | 1179 | 59.55  | 79.80  |
| 10000 | 1.13 | 0.6500 | 0.3500 | 4225 | 5142 | 1225 | 32.69 | 0.6434 | 0.6566 | 0.3434 | 0.3566 | 4140 | 4589 | 1272 | 4311 | 4509 | 1179 | 70.05  | 92.10  |
| 10000 | 1.14 | 0.6500 | 0.3500 | 4225 | 5187 | 1225 | 37.73 | 0.6434 | 0.6566 | 0.3434 | 0.3566 | 4140 | 4589 | 1272 | 4311 | 4509 | 1179 | 81.47  | 105.31 |
| 10000 | 1.15 | 0.6500 | 0.3500 | 4225 | 5233 | 1225 | 43.10 | 0.6434 | 0.6566 | 0.3434 | 0.3566 | 4140 | 4589 | 1272 | 4311 | 4509 | 1179 | 93.78  | 119.44 |
| 10000 | 1.16 | 0.6500 | 0.3500 | 4225 | 5278 | 1225 | 48.79 | 0.6434 | 0.6566 | 0.3434 | 0.3566 | 4140 | 4589 | 1272 | 4311 | 4509 | 1179 | 107.00 | 134.49 |
| 10000 | 1.17 | 0.6500 | 0.3500 | 4225 | 5324 | 1225 | 54.81 | 0.6434 | 0.6566 | 0.3434 | 0.3566 | 4140 | 4589 | 1272 | 4311 | 4509 | 1179 | 121.12 | 150.46 |
| 10000 | 1.18 | 0.6500 | 0.3500 | 4225 | 5369 | 1225 | 61.16 | 0.6434 | 0.6566 | 0.3434 | 0.3566 | 4140 | 4589 | 1272 | 4311 | 4509 | 1179 | 136.14 | 167.35 |
| 10000 | 1.19 | 0.6500 | 0.3500 | 4225 | 5415 | 1225 | 67.81 | 0.6434 | 0.6566 | 0.3434 | 0.3566 | 4140 | 4589 | 1272 | 4311 | 4509 | 1179 | 152.06 | 185.15 |
| 10000 | 1.20 | 0.6500 | 0.3500 | 4225 | 5460 | 1225 | 74.78 | 0.6434 | 0.6566 | 0.3434 | 0.3566 | 4140 | 4589 | 1272 | 4311 | 4509 | 1179 | 168.89 | 203.87 |
| 10000 | 0.80 | 0.7000 | 0.3000 | 4900 | 3360 | 900  | 80.11 | 0.6936 | 0.7064 | 0.2936 | 0.3064 | 4811 | 4250 | 939  | 4989 | 4148 | 862  | 189.59 | 153.08 |
| 10000 | 0.81 | 0.7000 | 0.3000 | 4900 | 3402 | 900  | 71.80 | 0.6936 | 0.7064 | 0.2936 | 0.3064 | 4811 | 4250 | 939  | 4989 | 4148 | 862  | 172.41 | 137.54 |
| 10000 | 0.82 | 0.7000 | 0.3000 | 4900 | 3444 | 900  | 64.00 | 0.6936 | 0.7064 | 0.2936 | 0.3064 | 4811 | 4250 | 939  | 4989 | 4148 | 862  | 156.06 | 122.85 |
| 10000 | 0.83 | 0.7000 | 0.3000 | 4900 | 3486 | 900  | 56.70 | 0.6936 | 0.7064 | 0.2936 | 0.3064 | 4811 | 4250 | 939  | 4989 | 4148 | 862  | 140.55 | 109.01 |

|       |      |        |        |      |      |     |       |        |        |        |        |      |      |     |      |      |     |        |        |
|-------|------|--------|--------|------|------|-----|-------|--------|--------|--------|--------|------|------|-----|------|------|-----|--------|--------|
| 10000 | 0.84 | 0.7000 | 0.3000 | 4900 | 3528 | 900 | 49.89 | 0.6936 | 0.7064 | 0.2936 | 0.3064 | 4811 | 4250 | 939 | 4989 | 4148 | 862 | 125.86 | 96.03  |
| 10000 | 0.85 | 0.7000 | 0.3000 | 4900 | 3570 | 900 | 43.56 | 0.6936 | 0.7064 | 0.2936 | 0.3064 | 4811 | 4250 | 939 | 4989 | 4148 | 862 | 112.01 | 83.89  |
| 10000 | 0.86 | 0.7000 | 0.3000 | 4900 | 3612 | 900 | 37.69 | 0.6936 | 0.7064 | 0.2936 | 0.3064 | 4811 | 4250 | 939 | 4989 | 4148 | 862 | 98.98  | 72.60  |
| 10000 | 0.87 | 0.7000 | 0.3000 | 4900 | 3654 | 900 | 32.29 | 0.6936 | 0.7064 | 0.2936 | 0.3064 | 4811 | 4250 | 939 | 4989 | 4148 | 862 | 86.79  | 62.17  |
| 10000 | 0.88 | 0.7000 | 0.3000 | 4900 | 3696 | 900 | 27.33 | 0.6936 | 0.7064 | 0.2936 | 0.3064 | 4811 | 4250 | 939 | 4989 | 4148 | 862 | 75.42  | 52.58  |
| 10000 | 0.89 | 0.7000 | 0.3000 | 4900 | 3738 | 900 | 22.82 | 0.6936 | 0.7064 | 0.2936 | 0.3064 | 4811 | 4250 | 939 | 4989 | 4148 | 862 | 64.89  | 43.85  |
| 10000 | 0.90 | 0.7000 | 0.3000 | 4900 | 3780 | 900 | 18.74 | 0.6936 | 0.7064 | 0.2936 | 0.3064 | 4811 | 4250 | 939 | 4989 | 4148 | 862 | 55.19  | 35.96  |
| 10000 | 0.91 | 0.7000 | 0.3000 | 4900 | 3822 | 900 | 15.09 | 0.6936 | 0.7064 | 0.2936 | 0.3064 | 4811 | 4250 | 939 | 4989 | 4148 | 862 | 46.31  | 28.93  |
| 10000 | 0.92 | 0.7000 | 0.3000 | 4900 | 3864 | 900 | 11.84 | 0.6936 | 0.7064 | 0.2936 | 0.3064 | 4811 | 4250 | 939 | 4989 | 4148 | 862 | 38.27  | 22.74  |
| 10000 | 0.93 | 0.7000 | 0.3000 | 4900 | 3906 | 900 | 9.01  | 0.6936 | 0.7064 | 0.2936 | 0.3064 | 4811 | 4250 | 939 | 4989 | 4148 | 862 | 31.05  | 17.41  |
| 10000 | 0.94 | 0.7000 | 0.3000 | 4900 | 3948 | 900 | 6.58  | 0.6936 | 0.7064 | 0.2936 | 0.3064 | 4811 | 4250 | 939 | 4989 | 4148 | 862 | 24.67  | 12.93  |
| 10000 | 0.95 | 0.7000 | 0.3000 | 4900 | 3990 | 900 | 4.54  | 0.6936 | 0.7064 | 0.2936 | 0.3064 | 4811 | 4250 | 939 | 4989 | 4148 | 862 | 19.11  | 9.29   |
| 10000 | 0.96 | 0.7000 | 0.3000 | 4900 | 4032 | 900 | 2.89  | 0.6936 | 0.7064 | 0.2936 | 0.3064 | 4811 | 4250 | 939 | 4989 | 4148 | 862 | 14.39  | 6.51   |
| 10000 | 0.97 | 0.7000 | 0.3000 | 4900 | 4074 | 900 | 1.62  | 0.6936 | 0.7064 | 0.2936 | 0.3064 | 4811 | 4250 | 939 | 4989 | 4148 | 862 | 10.50  | 4.58   |
| 10000 | 0.98 | 0.7000 | 0.3000 | 4900 | 4116 | 900 | 0.71  | 0.6936 | 0.7064 | 0.2936 | 0.3064 | 4811 | 4250 | 939 | 4989 | 4148 | 862 | 7.43   | 3.50   |
| 10000 | 0.99 | 0.7000 | 0.3000 | 4900 | 4158 | 900 | 0.18  | 0.6936 | 0.7064 | 0.2936 | 0.3064 | 4811 | 4250 | 939 | 4989 | 4148 | 862 | 5.20   | 3.27   |
| 10000 | 1.00 | 0.7000 | 0.3000 | 4900 | 4200 | 900 | 0.00  | 0.6936 | 0.7064 | 0.2936 | 0.3064 | 4811 | 4250 | 939 | 4989 | 4148 | 862 | 3.80   | 3.89   |
| 10000 | 1.01 | 0.7000 | 0.3000 | 4900 | 4242 | 900 | 0.18  | 0.6936 | 0.7064 | 0.2936 | 0.3064 | 4811 | 4250 | 939 | 4989 | 4148 | 862 | 3.22   | 5.36   |
| 10000 | 1.02 | 0.7000 | 0.3000 | 4900 | 4284 | 900 | 0.70  | 0.6936 | 0.7064 | 0.2936 | 0.3064 | 4811 | 4250 | 939 | 4989 | 4148 | 862 | 3.48   | 7.68   |
| 10000 | 1.03 | 0.7000 | 0.3000 | 4900 | 4326 | 900 | 1.56  | 0.6936 | 0.7064 | 0.2936 | 0.3064 | 4811 | 4250 | 939 | 4989 | 4148 | 862 | 4.57   | 10.85  |
| 10000 | 1.04 | 0.7000 | 0.3000 | 4900 | 4368 | 900 | 2.76  | 0.6936 | 0.7064 | 0.2936 | 0.3064 | 4811 | 4250 | 939 | 4989 | 4148 | 862 | 6.48   | 14.87  |
| 10000 | 1.05 | 0.7000 | 0.3000 | 4900 | 4410 | 900 | 4.29  | 0.6936 | 0.7064 | 0.2936 | 0.3064 | 4811 | 4250 | 939 | 4989 | 4148 | 862 | 9.23   | 19.75  |
| 10000 | 1.06 | 0.7000 | 0.3000 | 4900 | 4452 | 900 | 6.14  | 0.6936 | 0.7064 | 0.2936 | 0.3064 | 4811 | 4250 | 939 | 4989 | 4148 | 862 | 12.81  | 25.47  |
| 10000 | 1.07 | 0.7000 | 0.3000 | 4900 | 4494 | 900 | 8.31  | 0.6936 | 0.7064 | 0.2936 | 0.3064 | 4811 | 4250 | 939 | 4989 | 4148 | 862 | 17.22  | 32.04  |
| 10000 | 1.08 | 0.7000 | 0.3000 | 4900 | 4536 | 900 | 10.79 | 0.6936 | 0.7064 | 0.2936 | 0.3064 | 4811 | 4250 | 939 | 4989 | 4148 | 862 | 22.45  | 39.47  |
| 10000 | 1.09 | 0.7000 | 0.3000 | 4900 | 4578 | 900 | 13.59 | 0.6936 | 0.7064 | 0.2936 | 0.3064 | 4811 | 4250 | 939 | 4989 | 4148 | 862 | 28.52  | 47.74  |
| 10000 | 1.10 | 0.7000 | 0.3000 | 4900 | 4620 | 900 | 16.68 | 0.6936 | 0.7064 | 0.2936 | 0.3064 | 4811 | 4250 | 939 | 4989 | 4148 | 862 | 35.42  | 56.86  |
| 10000 | 1.11 | 0.7000 | 0.3000 | 4900 | 4662 | 900 | 20.08 | 0.6936 | 0.7064 | 0.2936 | 0.3064 | 4811 | 4250 | 939 | 4989 | 4148 | 862 | 43.15  | 66.84  |
| 10000 | 1.12 | 0.7000 | 0.3000 | 4900 | 4704 | 900 | 23.77 | 0.6936 | 0.7064 | 0.2936 | 0.3064 | 4811 | 4250 | 939 | 4989 | 4148 | 862 | 51.71  | 77.66  |
| 10000 | 1.13 | 0.7000 | 0.3000 | 4900 | 4746 | 900 | 27.75 | 0.6936 | 0.7064 | 0.2936 | 0.3064 | 4811 | 4250 | 939 | 4989 | 4148 | 862 | 61.09  | 89.34  |
| 10000 | 1.14 | 0.7000 | 0.3000 | 4900 | 4788 | 900 | 32.02 | 0.6936 | 0.7064 | 0.2936 | 0.3064 | 4811 | 4250 | 939 | 4989 | 4148 | 862 | 71.31  | 101.87 |
| 10000 | 1.15 | 0.7000 | 0.3000 | 4900 | 4830 | 900 | 36.57 | 0.6936 | 0.7064 | 0.2936 | 0.3064 | 4811 | 4250 | 939 | 4989 | 4148 | 862 | 82.36  | 115.24 |
| 10000 | 1.16 | 0.7000 | 0.3000 | 4900 | 4872 | 900 | 41.39 | 0.6936 | 0.7064 | 0.2936 | 0.3064 | 4811 | 4250 | 939 | 4989 | 4148 | 862 | 94.24  | 129.47 |
| 10000 | 1.17 | 0.7000 | 0.3000 | 4900 | 4914 | 900 | 46.49 | 0.6936 | 0.7064 | 0.2936 | 0.3064 | 4811 | 4250 | 939 | 4989 | 4148 | 862 | 106.95 | 144.55 |
| 10000 | 1.18 | 0.7000 | 0.3000 | 4900 | 4956 | 900 | 51.85 | 0.6936 | 0.7064 | 0.2936 | 0.3064 | 4811 | 4250 | 939 | 4989 | 4148 | 862 | 120.49 | 160.48 |



|       |      |        |        |      |      |     |       |        |        |        |        |      |      |     |      |      |     |        |        |
|-------|------|--------|--------|------|------|-----|-------|--------|--------|--------|--------|------|------|-----|------|------|-----|--------|--------|
| 10000 | 1.19 | 0.7000 | 0.3000 | 4900 | 4998 | 900 | 57.49 | 0.6936 | 0.7064 | 0.2936 | 0.3064 | 4811 | 4250 | 939 | 4989 | 4148 | 862 | 134.86 | 177.25 |
| 10000 | 1.20 | 0.7000 | 0.3000 | 4900 | 5040 | 900 | 63.38 | 0.6936 | 0.7064 | 0.2936 | 0.3064 | 4811 | 4250 | 939 | 4989 | 4148 | 862 | 150.05 | 194.88 |
| 10000 | 0.80 | 0.7500 | 0.2500 | 5625 | 3000 | 625 | 64.63 | 0.7440 | 0.7560 | 0.2440 | 0.2560 | 5535 | 3809 | 655 | 5715 | 3689 | 595 | 174.80 | 131.68 |
| 10000 | 0.81 | 0.7500 | 0.2500 | 5625 | 3038 | 625 | 57.89 | 0.7440 | 0.7560 | 0.2440 | 0.2560 | 5535 | 3809 | 655 | 5715 | 3689 | 595 | 159.23 | 118.05 |
| 10000 | 0.82 | 0.7500 | 0.2500 | 5625 | 3075 | 625 | 51.56 | 0.7440 | 0.7560 | 0.2440 | 0.2560 | 5535 | 3809 | 655 | 5715 | 3689 | 595 | 144.40 | 105.18 |
| 10000 | 0.83 | 0.7500 | 0.2500 | 5625 | 3113 | 625 | 45.64 | 0.7440 | 0.7560 | 0.2440 | 0.2560 | 5535 | 3809 | 655 | 5715 | 3689 | 595 | 130.32 | 93.08  |
| 10000 | 0.84 | 0.7500 | 0.2500 | 5625 | 3150 | 625 | 40.13 | 0.7440 | 0.7560 | 0.2440 | 0.2560 | 5535 | 3809 | 655 | 5715 | 3689 | 595 | 116.97 | 81.73  |
| 10000 | 0.85 | 0.7500 | 0.2500 | 5625 | 3188 | 625 | 35.01 | 0.7440 | 0.7560 | 0.2440 | 0.2560 | 5535 | 3809 | 655 | 5715 | 3689 | 595 | 104.35 | 71.15  |
| 10000 | 0.86 | 0.7500 | 0.2500 | 5625 | 3225 | 625 | 30.28 | 0.7440 | 0.7560 | 0.2440 | 0.2560 | 5535 | 3809 | 655 | 5715 | 3689 | 595 | 92.48  | 61.33  |
| 10000 | 0.87 | 0.7500 | 0.2500 | 5625 | 3263 | 625 | 25.92 | 0.7440 | 0.7560 | 0.2440 | 0.2560 | 5535 | 3809 | 655 | 5715 | 3689 | 595 | 81.35  | 52.27  |
| 10000 | 0.88 | 0.7500 | 0.2500 | 5625 | 3300 | 625 | 21.93 | 0.7440 | 0.7560 | 0.2440 | 0.2560 | 5535 | 3809 | 655 | 5715 | 3689 | 595 | 70.95  | 43.98  |
| 10000 | 0.89 | 0.7500 | 0.2500 | 5625 | 3338 | 625 | 18.30 | 0.7440 | 0.7560 | 0.2440 | 0.2560 | 5535 | 3809 | 655 | 5715 | 3689 | 595 | 61.29  | 36.45  |
| 10000 | 0.90 | 0.7500 | 0.2500 | 5625 | 3375 | 625 | 15.02 | 0.7440 | 0.7560 | 0.2440 | 0.2560 | 5535 | 3809 | 655 | 5715 | 3689 | 595 | 52.37  | 29.68  |
| 10000 | 0.91 | 0.7500 | 0.2500 | 5625 | 3413 | 625 | 12.08 | 0.7440 | 0.7560 | 0.2440 | 0.2560 | 5535 | 3809 | 655 | 5715 | 3689 | 595 | 44.19  | 23.67  |
| 10000 | 0.92 | 0.7500 | 0.2500 | 5625 | 3450 | 625 | 9.48  | 0.7440 | 0.7560 | 0.2440 | 0.2560 | 5535 | 3809 | 655 | 5715 | 3689 | 595 | 36.75  | 18.42  |
| 10000 | 0.93 | 0.7500 | 0.2500 | 5625 | 3488 | 625 | 7.21  | 0.7440 | 0.7560 | 0.2440 | 0.2560 | 5535 | 3809 | 655 | 5715 | 3689 | 595 | 30.04  | 13.94  |
| 10000 | 0.94 | 0.7500 | 0.2500 | 5625 | 3525 | 625 | 5.26  | 0.7440 | 0.7560 | 0.2440 | 0.2560 | 5535 | 3809 | 655 | 5715 | 3689 | 595 | 24.08  | 10.22  |
| 10000 | 0.95 | 0.7500 | 0.2500 | 5625 | 3563 | 625 | 3.63  | 0.7440 | 0.7560 | 0.2440 | 0.2560 | 5535 | 3809 | 655 | 5715 | 3689 | 595 | 18.85  | 7.26   |
| 10000 | 0.96 | 0.7500 | 0.2500 | 5625 | 3600 | 625 | 2.31  | 0.7440 | 0.7560 | 0.2440 | 0.2560 | 5535 | 3809 | 655 | 5715 | 3689 | 595 | 14.36  | 5.07   |
| 10000 | 0.97 | 0.7500 | 0.2500 | 5625 | 3638 | 625 | 1.29  | 0.7440 | 0.7560 | 0.2440 | 0.2560 | 5535 | 3809 | 655 | 5715 | 3689 | 595 | 10.61  | 3.63   |
| 10000 | 0.98 | 0.7500 | 0.2500 | 5625 | 3675 | 625 | 0.57  | 0.7440 | 0.7560 | 0.2440 | 0.2560 | 5535 | 3809 | 655 | 5715 | 3689 | 595 | 7.59   | 2.96   |
| 10000 | 0.99 | 0.7500 | 0.2500 | 5625 | 3713 | 625 | 0.14  | 0.7440 | 0.7560 | 0.2440 | 0.2560 | 5535 | 3809 | 655 | 5715 | 3689 | 595 | 5.32   | 3.05   |
| 10000 | 1.00 | 0.7500 | 0.2500 | 5625 | 3750 | 625 | 0.00  | 0.7440 | 0.7560 | 0.2440 | 0.2560 | 5535 | 3809 | 655 | 5715 | 3689 | 595 | 3.78   | 3.91   |
| 10000 | 1.01 | 0.7500 | 0.2500 | 5625 | 3788 | 625 | 0.14  | 0.7440 | 0.7560 | 0.2440 | 0.2560 | 5535 | 3809 | 655 | 5715 | 3689 | 595 | 2.98   | 5.52   |
| 10000 | 1.02 | 0.7500 | 0.2500 | 5625 | 3825 | 625 | 0.56  | 0.7440 | 0.7560 | 0.2440 | 0.2560 | 5535 | 3809 | 655 | 5715 | 3689 | 595 | 2.92   | 7.90   |
| 10000 | 1.03 | 0.7500 | 0.2500 | 5625 | 3863 | 625 | 1.24  | 0.7440 | 0.7560 | 0.2440 | 0.2560 | 5535 | 3809 | 655 | 5715 | 3689 | 595 | 3.60   | 11.04  |
| 10000 | 1.04 | 0.7500 | 0.2500 | 5625 | 3900 | 625 | 2.20  | 0.7440 | 0.7560 | 0.2440 | 0.2560 | 5535 | 3809 | 655 | 5715 | 3689 | 595 | 5.02   | 14.94  |
| 10000 | 1.05 | 0.7500 | 0.2500 | 5625 | 3938 | 625 | 3.41  | 0.7440 | 0.7560 | 0.2440 | 0.2560 | 5535 | 3809 | 655 | 5715 | 3689 | 595 | 7.17   | 19.61  |
| 10000 | 1.06 | 0.7500 | 0.2500 | 5625 | 3975 | 625 | 4.88  | 0.7440 | 0.7560 | 0.2440 | 0.2560 | 5535 | 3809 | 655 | 5715 | 3689 | 595 | 10.07  | 25.04  |
| 10000 | 1.07 | 0.7500 | 0.2500 | 5625 | 4013 | 625 | 6.61  | 0.7440 | 0.7560 | 0.2440 | 0.2560 | 5535 | 3809 | 655 | 5715 | 3689 | 595 | 13.70  | 31.23  |
| 10000 | 1.08 | 0.7500 | 0.2500 | 5625 | 4050 | 625 | 8.58  | 0.7440 | 0.7560 | 0.2440 | 0.2560 | 5535 | 3809 | 655 | 5715 | 3689 | 595 | 18.07  | 38.18  |
| 10000 | 1.09 | 0.7500 | 0.2500 | 5625 | 4088 | 625 | 10.79 | 0.7440 | 0.7560 | 0.2440 | 0.2560 | 5535 | 3809 | 655 | 5715 | 3689 | 595 | 23.18  | 45.89  |
| 10000 | 1.10 | 0.7500 | 0.2500 | 5625 | 4125 | 625 | 13.25 | 0.7440 | 0.7560 | 0.2440 | 0.2560 | 5535 | 3809 | 655 | 5715 | 3689 | 595 | 29.02  | 54.37  |
| 10000 | 1.11 | 0.7500 | 0.2500 | 5625 | 4163 | 625 | 15.94 | 0.7440 | 0.7560 | 0.2440 | 0.2560 | 5535 | 3809 | 655 | 5715 | 3689 | 595 | 35.61  | 63.61  |
| 10000 | 1.12 | 0.7500 | 0.2500 | 5625 | 4200 | 625 | 18.86 | 0.7440 | 0.7560 | 0.2440 | 0.2560 | 5535 | 3809 | 655 | 5715 | 3689 | 595 | 42.93  | 73.61  |

|       |      |        |        |      |      |     |       |        |        |        |        |      |      |     |      |      |     |        |        |
|-------|------|--------|--------|------|------|-----|-------|--------|--------|--------|--------|------|------|-----|------|------|-----|--------|--------|
| 10000 | 1.13 | 0.7500 | 0.2500 | 5625 | 4238 | 625 | 22.02 | 0.7440 | 0.7560 | 0.2440 | 0.2560 | 5535 | 3809 | 655 | 5715 | 3689 | 595 | 50.99  | 84.37  |
| 10000 | 1.14 | 0.7500 | 0.2500 | 5625 | 4275 | 625 | 25.39 | 0.7440 | 0.7560 | 0.2440 | 0.2560 | 5535 | 3809 | 655 | 5715 | 3689 | 595 | 59.79  | 95.90  |
| 10000 | 1.15 | 0.7500 | 0.2500 | 5625 | 4313 | 625 | 28.99 | 0.7440 | 0.7560 | 0.2440 | 0.2560 | 5535 | 3809 | 655 | 5715 | 3689 | 595 | 69.33  | 108.19 |
| 10000 | 1.16 | 0.7500 | 0.2500 | 5625 | 4350 | 625 | 32.81 | 0.7440 | 0.7560 | 0.2440 | 0.2560 | 5535 | 3809 | 655 | 5715 | 3689 | 595 | 79.61  | 121.24 |
| 10000 | 1.17 | 0.7500 | 0.2500 | 5625 | 4388 | 625 | 36.84 | 0.7440 | 0.7560 | 0.2440 | 0.2560 | 5535 | 3809 | 655 | 5715 | 3689 | 595 | 90.62  | 135.05 |
| 10000 | 1.18 | 0.7500 | 0.2500 | 5625 | 4425 | 625 | 41.08 | 0.7440 | 0.7560 | 0.2440 | 0.2560 | 5535 | 3809 | 655 | 5715 | 3689 | 595 | 102.38 | 149.63 |
| 10000 | 1.19 | 0.7500 | 0.2500 | 5625 | 4463 | 625 | 45.53 | 0.7440 | 0.7560 | 0.2440 | 0.2560 | 5535 | 3809 | 655 | 5715 | 3689 | 595 | 114.87 | 164.97 |
| 10000 | 1.20 | 0.7500 | 0.2500 | 5625 | 4500 | 625 | 50.18 | 0.7440 | 0.7560 | 0.2440 | 0.2560 | 5535 | 3809 | 655 | 5715 | 3689 | 595 | 128.10 | 181.07 |
| 10000 | 0.80 | 0.8000 | 0.2000 | 6400 | 2560 | 400 | 47.76 | 0.7945 | 0.8055 | 0.1945 | 0.2055 | 6312 | 3266 | 422 | 6489 | 3133 | 378 | 155.01 | 107.24 |
| 10000 | 0.81 | 0.8000 | 0.2000 | 6400 | 2592 | 400 | 42.73 | 0.7945 | 0.8055 | 0.1945 | 0.2055 | 6312 | 3266 | 422 | 6489 | 3133 | 378 | 141.49 | 95.86  |
| 10000 | 0.82 | 0.8000 | 0.2000 | 6400 | 2624 | 400 | 38.02 | 0.7945 | 0.8055 | 0.1945 | 0.2055 | 6312 | 3266 | 422 | 6489 | 3133 | 378 | 128.60 | 85.14  |
| 10000 | 0.83 | 0.8000 | 0.2000 | 6400 | 2656 | 400 | 33.63 | 0.7945 | 0.8055 | 0.1945 | 0.2055 | 6312 | 3266 | 422 | 6489 | 3133 | 378 | 116.34 | 75.07  |
| 10000 | 0.84 | 0.8000 | 0.2000 | 6400 | 2688 | 400 | 29.55 | 0.7945 | 0.8055 | 0.1945 | 0.2055 | 6312 | 3266 | 422 | 6489 | 3133 | 378 | 104.70 | 65.65  |
| 10000 | 0.85 | 0.8000 | 0.2000 | 6400 | 2720 | 400 | 25.76 | 0.7945 | 0.8055 | 0.1945 | 0.2055 | 6312 | 3266 | 422 | 6489 | 3133 | 378 | 93.69  | 56.89  |
| 10000 | 0.86 | 0.8000 | 0.2000 | 6400 | 2752 | 400 | 22.26 | 0.7945 | 0.8055 | 0.1945 | 0.2055 | 6312 | 3266 | 422 | 6489 | 3133 | 378 | 83.30  | 48.79  |
| 10000 | 0.87 | 0.8000 | 0.2000 | 6400 | 2784 | 400 | 19.04 | 0.7945 | 0.8055 | 0.1945 | 0.2055 | 6312 | 3266 | 422 | 6489 | 3133 | 378 | 73.54  | 41.33  |
| 10000 | 0.88 | 0.8000 | 0.2000 | 6400 | 2816 | 400 | 16.09 | 0.7945 | 0.8055 | 0.1945 | 0.2055 | 6312 | 3266 | 422 | 6489 | 3133 | 378 | 64.41  | 34.53  |
| 10000 | 0.89 | 0.8000 | 0.2000 | 6400 | 2848 | 400 | 13.42 | 0.7945 | 0.8055 | 0.1945 | 0.2055 | 6312 | 3266 | 422 | 6489 | 3133 | 378 | 55.91  | 28.39  |
| 10000 | 0.90 | 0.8000 | 0.2000 | 6400 | 2880 | 400 | 11.01 | 0.7945 | 0.8055 | 0.1945 | 0.2055 | 6312 | 3266 | 422 | 6489 | 3133 | 378 | 48.03  | 22.89  |
| 10000 | 0.91 | 0.8000 | 0.2000 | 6400 | 2912 | 400 | 8.85  | 0.7945 | 0.8055 | 0.1945 | 0.2055 | 6312 | 3266 | 422 | 6489 | 3133 | 378 | 40.79  | 18.06  |
| 10000 | 0.92 | 0.8000 | 0.2000 | 6400 | 2944 | 400 | 6.94  | 0.7945 | 0.8055 | 0.1945 | 0.2055 | 6312 | 3266 | 422 | 6489 | 3133 | 378 | 34.16  | 13.87  |
| 10000 | 0.93 | 0.8000 | 0.2000 | 6400 | 2976 | 400 | 5.27  | 0.7945 | 0.8055 | 0.1945 | 0.2055 | 6312 | 3266 | 422 | 6489 | 3133 | 378 | 28.17  | 10.34  |
| 10000 | 0.94 | 0.8000 | 0.2000 | 6400 | 3008 | 400 | 3.85  | 0.7945 | 0.8055 | 0.1945 | 0.2055 | 6312 | 3266 | 422 | 6489 | 3133 | 378 | 22.80  | 7.46   |
| 10000 | 0.95 | 0.8000 | 0.2000 | 6400 | 3040 | 400 | 2.65  | 0.7945 | 0.8055 | 0.1945 | 0.2055 | 6312 | 3266 | 422 | 6489 | 3133 | 378 | 18.06  | 5.24   |
| 10000 | 0.96 | 0.8000 | 0.2000 | 6400 | 3072 | 400 | 1.68  | 0.7945 | 0.8055 | 0.1945 | 0.2055 | 6312 | 3266 | 422 | 6489 | 3133 | 378 | 13.95  | 3.67   |
| 10000 | 0.97 | 0.8000 | 0.2000 | 6400 | 3104 | 400 | 0.94  | 0.7945 | 0.8055 | 0.1945 | 0.2055 | 6312 | 3266 | 422 | 6489 | 3133 | 378 | 10.46  | 2.75   |
| 10000 | 0.98 | 0.8000 | 0.2000 | 6400 | 3136 | 400 | 0.42  | 0.7945 | 0.8055 | 0.1945 | 0.2055 | 6312 | 3266 | 422 | 6489 | 3133 | 378 | 7.60   | 2.49   |
| 10000 | 0.99 | 0.8000 | 0.2000 | 6400 | 3168 | 400 | 0.10  | 0.7945 | 0.8055 | 0.1945 | 0.2055 | 6312 | 3266 | 422 | 6489 | 3133 | 378 | 5.37   | 2.88   |
| 10000 | 1.00 | 0.8000 | 0.2000 | 6400 | 3200 | 400 | 0.00  | 0.7945 | 0.8055 | 0.1945 | 0.2055 | 6312 | 3266 | 422 | 6489 | 3133 | 378 | 3.76   | 3.92   |
| 10000 | 1.01 | 0.8000 | 0.2000 | 6400 | 3232 | 400 | 0.10  | 0.7945 | 0.8055 | 0.1945 | 0.2055 | 6312 | 3266 | 422 | 6489 | 3133 | 378 | 2.79   | 5.62   |
| 10000 | 1.02 | 0.8000 | 0.2000 | 6400 | 3264 | 400 | 0.40  | 0.7945 | 0.8055 | 0.1945 | 0.2055 | 6312 | 3266 | 422 | 6489 | 3133 | 378 | 2.44   | 7.97   |
| 10000 | 1.03 | 0.8000 | 0.2000 | 6400 | 3296 | 400 | 0.90  | 0.7945 | 0.8055 | 0.1945 | 0.2055 | 6312 | 3266 | 422 | 6489 | 3133 | 378 | 2.71   | 10.98  |
| 10000 | 1.04 | 0.8000 | 0.2000 | 6400 | 3328 | 400 | 1.60  | 0.7945 | 0.8055 | 0.1945 | 0.2055 | 6312 | 3266 | 422 | 6489 | 3133 | 378 | 3.61   | 14.64  |
| 10000 | 1.05 | 0.8000 | 0.2000 | 6400 | 3360 | 400 | 2.48  | 0.7945 | 0.8055 | 0.1945 | 0.2055 | 6312 | 3266 | 422 | 6489 | 3133 | 378 | 5.14   | 18.95  |
| 10000 | 1.06 | 0.8000 | 0.2000 | 6400 | 3392 | 400 | 3.54  | 0.7945 | 0.8055 | 0.1945 | 0.2055 | 6312 | 3266 | 422 | 6489 | 3133 | 378 | 7.30   | 23.92  |

|       |      |        |        |      |      |     |       |        |        |        |        |      |      |     |      |      |     |        |        |
|-------|------|--------|--------|------|------|-----|-------|--------|--------|--------|--------|------|------|-----|------|------|-----|--------|--------|
| 10000 | 1.07 | 0.8000 | 0.2000 | 6400 | 3424 | 400 | 4.79  | 0.7945 | 0.8055 | 0.1945 | 0.2055 | 6312 | 3266 | 422 | 6489 | 3133 | 378 | 10.09  | 29.54  |
| 10000 | 1.08 | 0.8000 | 0.2000 | 6400 | 3456 | 400 | 6.22  | 0.7945 | 0.8055 | 0.1945 | 0.2055 | 6312 | 3266 | 422 | 6489 | 3133 | 378 | 13.50  | 35.82  |
| 10000 | 1.09 | 0.8000 | 0.2000 | 6400 | 3488 | 400 | 7.82  | 0.7945 | 0.8055 | 0.1945 | 0.2055 | 6312 | 3266 | 422 | 6489 | 3133 | 378 | 17.54  | 42.74  |
| 10000 | 1.10 | 0.8000 | 0.2000 | 6400 | 3520 | 400 | 9.60  | 0.7945 | 0.8055 | 0.1945 | 0.2055 | 6312 | 3266 | 422 | 6489 | 3133 | 378 | 22.20  | 50.33  |
| 10000 | 1.11 | 0.8000 | 0.2000 | 6400 | 3552 | 400 | 11.55 | 0.7945 | 0.8055 | 0.1945 | 0.2055 | 6312 | 3266 | 422 | 6489 | 3133 | 378 | 27.50  | 58.56  |
| 10000 | 1.12 | 0.8000 | 0.2000 | 6400 | 3584 | 400 | 13.66 | 0.7945 | 0.8055 | 0.1945 | 0.2055 | 6312 | 3266 | 422 | 6489 | 3133 | 378 | 33.42  | 67.45  |
| 10000 | 1.13 | 0.8000 | 0.2000 | 6400 | 3616 | 400 | 15.94 | 0.7945 | 0.8055 | 0.1945 | 0.2055 | 6312 | 3266 | 422 | 6489 | 3133 | 378 | 39.96  | 76.99  |
| 10000 | 1.14 | 0.8000 | 0.2000 | 6400 | 3648 | 400 | 18.37 | 0.7945 | 0.8055 | 0.1945 | 0.2055 | 6312 | 3266 | 422 | 6489 | 3133 | 378 | 47.14  | 87.19  |
| 10000 | 1.15 | 0.8000 | 0.2000 | 6400 | 3680 | 400 | 20.97 | 0.7945 | 0.8055 | 0.1945 | 0.2055 | 6312 | 3266 | 422 | 6489 | 3133 | 378 | 54.94  | 98.04  |
| 10000 | 1.16 | 0.8000 | 0.2000 | 6400 | 3712 | 400 | 23.72 | 0.7945 | 0.8055 | 0.1945 | 0.2055 | 6312 | 3266 | 422 | 6489 | 3133 | 378 | 63.37  | 109.54 |
| 10000 | 1.17 | 0.8000 | 0.2000 | 6400 | 3744 | 400 | 26.62 | 0.7945 | 0.8055 | 0.1945 | 0.2055 | 6312 | 3266 | 422 | 6489 | 3133 | 378 | 72.42  | 121.70 |
| 10000 | 1.18 | 0.8000 | 0.2000 | 6400 | 3776 | 400 | 29.68 | 0.7945 | 0.8055 | 0.1945 | 0.2055 | 6312 | 3266 | 422 | 6489 | 3133 | 378 | 82.10  | 134.51 |
| 10000 | 1.19 | 0.8000 | 0.2000 | 6400 | 3808 | 400 | 32.88 | 0.7945 | 0.8055 | 0.1945 | 0.2055 | 6312 | 3266 | 422 | 6489 | 3133 | 378 | 92.41  | 147.98 |
| 10000 | 1.20 | 0.8000 | 0.2000 | 6400 | 3840 | 400 | 36.23 | 0.7945 | 0.8055 | 0.1945 | 0.2055 | 6312 | 3266 | 422 | 6489 | 3133 | 378 | 103.35 | 162.10 |
| 10000 | 0.80 | 0.8500 | 0.1500 | 7225 | 2040 | 225 | 30.85 | 0.8451 | 0.8549 | 0.1451 | 0.1549 | 7141 | 2619 | 240 | 7309 | 2480 | 210 | 129.86 | 80.13  |
| 10000 | 0.81 | 0.8500 | 0.1500 | 7225 | 2066 | 225 | 27.57 | 0.8451 | 0.8549 | 0.1451 | 0.1549 | 7141 | 2619 | 240 | 7309 | 2480 | 210 | 118.83 | 71.34  |
| 10000 | 0.82 | 0.8500 | 0.1500 | 7225 | 2091 | 225 | 24.51 | 0.8451 | 0.8549 | 0.1451 | 0.1549 | 7141 | 2619 | 240 | 7309 | 2480 | 210 | 108.31 | 63.07  |
| 10000 | 0.83 | 0.8500 | 0.1500 | 7225 | 2117 | 225 | 21.66 | 0.8451 | 0.8549 | 0.1451 | 0.1549 | 7141 | 2619 | 240 | 7309 | 2480 | 210 | 98.28  | 55.33  |
| 10000 | 0.84 | 0.8500 | 0.1500 | 7225 | 2142 | 225 | 19.01 | 0.8451 | 0.8549 | 0.1451 | 0.1549 | 7141 | 2619 | 240 | 7309 | 2480 | 210 | 88.74  | 48.11  |
| 10000 | 0.85 | 0.8500 | 0.1500 | 7225 | 2168 | 225 | 16.55 | 0.8451 | 0.8549 | 0.1451 | 0.1549 | 7141 | 2619 | 240 | 7309 | 2480 | 210 | 79.70  | 41.42  |
| 10000 | 0.86 | 0.8500 | 0.1500 | 7225 | 2193 | 225 | 14.29 | 0.8451 | 0.8549 | 0.1451 | 0.1549 | 7141 | 2619 | 240 | 7309 | 2480 | 210 | 71.16  | 35.25  |
| 10000 | 0.87 | 0.8500 | 0.1500 | 7225 | 2219 | 225 | 12.21 | 0.8451 | 0.8549 | 0.1451 | 0.1549 | 7141 | 2619 | 240 | 7309 | 2480 | 210 | 63.12  | 29.61  |
| 10000 | 0.88 | 0.8500 | 0.1500 | 7225 | 2244 | 225 | 10.31 | 0.8451 | 0.8549 | 0.1451 | 0.1549 | 7141 | 2619 | 240 | 7309 | 2480 | 210 | 55.57  | 24.49  |
| 10000 | 0.89 | 0.8500 | 0.1500 | 7225 | 2270 | 225 | 8.59  | 0.8451 | 0.8549 | 0.1451 | 0.1549 | 7141 | 2619 | 240 | 7309 | 2480 | 210 | 48.52  | 19.89  |
| 10000 | 0.90 | 0.8500 | 0.1500 | 7225 | 2295 | 225 | 7.04  | 0.8451 | 0.8549 | 0.1451 | 0.1549 | 7141 | 2619 | 240 | 7309 | 2480 | 210 | 41.97  | 15.82  |
| 10000 | 0.91 | 0.8500 | 0.1500 | 7225 | 2321 | 225 | 5.65  | 0.8451 | 0.8549 | 0.1451 | 0.1549 | 7141 | 2619 | 240 | 7309 | 2480 | 210 | 35.91  | 12.27  |
| 10000 | 0.92 | 0.8500 | 0.1500 | 7225 | 2346 | 225 | 4.43  | 0.8451 | 0.8549 | 0.1451 | 0.1549 | 7141 | 2619 | 240 | 7309 | 2480 | 210 | 30.35  | 9.25   |
| 10000 | 0.93 | 0.8500 | 0.1500 | 7225 | 2372 | 225 | 3.36  | 0.8451 | 0.8549 | 0.1451 | 0.1549 | 7141 | 2619 | 240 | 7309 | 2480 | 210 | 25.29  | 6.75   |
| 10000 | 0.94 | 0.8500 | 0.1500 | 7225 | 2397 | 225 | 2.45  | 0.8451 | 0.8549 | 0.1451 | 0.1549 | 7141 | 2619 | 240 | 7309 | 2480 | 210 | 20.72  | 4.78   |
| 10000 | 0.95 | 0.8500 | 0.1500 | 7225 | 2423 | 225 | 1.69  | 0.8451 | 0.8549 | 0.1451 | 0.1549 | 7141 | 2619 | 240 | 7309 | 2480 | 210 | 16.65  | 3.33   |
| 10000 | 0.96 | 0.8500 | 0.1500 | 7225 | 2448 | 225 | 1.07  | 0.8451 | 0.8549 | 0.1451 | 0.1549 | 7141 | 2619 | 240 | 7309 | 2480 | 210 | 13.07  | 2.41   |
| 10000 | 0.97 | 0.8500 | 0.1500 | 7225 | 2474 | 225 | 0.60  | 0.8451 | 0.8549 | 0.1451 | 0.1549 | 7141 | 2619 | 240 | 7309 | 2480 | 210 | 9.99   | 2.01   |
| 10000 | 0.98 | 0.8500 | 0.1500 | 7225 | 2499 | 225 | 0.26  | 0.8451 | 0.8549 | 0.1451 | 0.1549 | 7141 | 2619 | 240 | 7309 | 2480 | 210 | 7.41   | 2.13   |
| 10000 | 0.99 | 0.8500 | 0.1500 | 7225 | 2525 | 225 | 0.07  | 0.8451 | 0.8549 | 0.1451 | 0.1549 | 7141 | 2619 | 240 | 7309 | 2480 | 210 | 5.33   | 2.78   |
| 10000 | 1.00 | 0.8500 | 0.1500 | 7225 | 2550 | 225 | 0.00  | 0.8451 | 0.8549 | 0.1451 | 0.1549 | 7141 | 2619 | 240 | 7309 | 2480 | 210 | 3.74   | 3.95   |

|       |      |        |        |      |      |     |       |        |        |        |        |      |      |     |      |      |     |       |        |
|-------|------|--------|--------|------|------|-----|-------|--------|--------|--------|--------|------|------|-----|------|------|-----|-------|--------|
| 10000 | 1.01 | 0.8500 | 0.1500 | 7225 | 2576 | 225 | 0.06  | 0.8451 | 0.8549 | 0.1451 | 0.1549 | 7141 | 2619 | 240 | 7309 | 2480 | 210 | 2.65  | 5.65   |
| 10000 | 1.02 | 0.8500 | 0.1500 | 7225 | 2601 | 225 | 0.26  | 0.8451 | 0.8549 | 0.1451 | 0.1549 | 7141 | 2619 | 240 | 7309 | 2480 | 210 | 2.05  | 7.87   |
| 10000 | 1.03 | 0.8500 | 0.1500 | 7225 | 2627 | 225 | 0.57  | 0.8451 | 0.8549 | 0.1451 | 0.1549 | 7141 | 2619 | 240 | 7309 | 2480 | 210 | 1.96  | 10.61  |
| 10000 | 1.04 | 0.8500 | 0.1500 | 7225 | 2652 | 225 | 1.01  | 0.8451 | 0.8549 | 0.1451 | 0.1549 | 7141 | 2619 | 240 | 7309 | 2480 | 210 | 2.36  | 13.88  |
| 10000 | 1.05 | 0.8500 | 0.1500 | 7225 | 2678 | 225 | 1.57  | 0.8451 | 0.8549 | 0.1451 | 0.1549 | 7141 | 2619 | 240 | 7309 | 2480 | 210 | 3.25  | 17.68  |
| 10000 | 1.06 | 0.8500 | 0.1500 | 7225 | 2703 | 225 | 2.24  | 0.8451 | 0.8549 | 0.1451 | 0.1549 | 7141 | 2619 | 240 | 7309 | 2480 | 210 | 4.64  | 22.00  |
| 10000 | 1.07 | 0.8500 | 0.1500 | 7225 | 2729 | 225 | 3.03  | 0.8451 | 0.8549 | 0.1451 | 0.1549 | 7141 | 2619 | 240 | 7309 | 2480 | 210 | 6.53  | 26.84  |
| 10000 | 1.08 | 0.8500 | 0.1500 | 7225 | 2754 | 225 | 3.93  | 0.8451 | 0.8549 | 0.1451 | 0.1549 | 7141 | 2619 | 240 | 7309 | 2480 | 210 | 8.91  | 32.21  |
| 10000 | 1.09 | 0.8500 | 0.1500 | 7225 | 2780 | 225 | 4.94  | 0.8451 | 0.8549 | 0.1451 | 0.1549 | 7141 | 2619 | 240 | 7309 | 2480 | 210 | 11.80 | 38.10  |
| 10000 | 1.10 | 0.8500 | 0.1500 | 7225 | 2805 | 225 | 6.06  | 0.8451 | 0.8549 | 0.1451 | 0.1549 | 7141 | 2619 | 240 | 7309 | 2480 | 210 | 15.17 | 44.51  |
| 10000 | 1.11 | 0.8500 | 0.1500 | 7225 | 2831 | 225 | 7.29  | 0.8451 | 0.8549 | 0.1451 | 0.1549 | 7141 | 2619 | 240 | 7309 | 2480 | 210 | 19.05 | 51.45  |
| 10000 | 1.12 | 0.8500 | 0.1500 | 7225 | 2856 | 225 | 8.62  | 0.8451 | 0.8549 | 0.1451 | 0.1549 | 7141 | 2619 | 240 | 7309 | 2480 | 210 | 23.42 | 58.92  |
| 10000 | 1.13 | 0.8500 | 0.1500 | 7225 | 2882 | 225 | 10.05 | 0.8451 | 0.8549 | 0.1451 | 0.1549 | 7141 | 2619 | 240 | 7309 | 2480 | 210 | 28.29 | 66.91  |
| 10000 | 1.14 | 0.8500 | 0.1500 | 7225 | 2907 | 225 | 11.58 | 0.8451 | 0.8549 | 0.1451 | 0.1549 | 7141 | 2619 | 240 | 7309 | 2480 | 210 | 33.65 | 75.42  |
| 10000 | 1.15 | 0.8500 | 0.1500 | 7225 | 2933 | 225 | 13.21 | 0.8451 | 0.8549 | 0.1451 | 0.1549 | 7141 | 2619 | 240 | 7309 | 2480 | 210 | 39.51 | 84.46  |
| 10000 | 1.16 | 0.8500 | 0.1500 | 7225 | 2958 | 225 | 14.93 | 0.8451 | 0.8549 | 0.1451 | 0.1549 | 7141 | 2619 | 240 | 7309 | 2480 | 210 | 45.87 | 94.02  |
| 10000 | 1.17 | 0.8500 | 0.1500 | 7225 | 2984 | 225 | 16.76 | 0.8451 | 0.8549 | 0.1451 | 0.1549 | 7141 | 2619 | 240 | 7309 | 2480 | 210 | 52.73 | 104.11 |
| 10000 | 1.18 | 0.8500 | 0.1500 | 7225 | 3009 | 225 | 18.67 | 0.8451 | 0.8549 | 0.1451 | 0.1549 | 7141 | 2619 | 240 | 7309 | 2480 | 210 | 60.08 | 114.72 |
| 10000 | 1.19 | 0.8500 | 0.1500 | 7225 | 3035 | 225 | 20.68 | 0.8451 | 0.8549 | 0.1451 | 0.1549 | 7141 | 2619 | 240 | 7309 | 2480 | 210 | 67.92 | 125.85 |
| 10000 | 1.20 | 0.8500 | 0.1500 | 7225 | 3060 | 225 | 22.78 | 0.8451 | 0.8549 | 0.1451 | 0.1549 | 7141 | 2619 | 240 | 7309 | 2480 | 210 | 76.27 | 137.51 |
| 10000 | 0.80 | 0.9000 | 0.1000 | 8100 | 1440 | 100 | 15.67 | 0.8958 | 0.9042 | 0.0958 | 0.1042 | 8025 | 1866 | 108 | 8175 | 1733 | 92  | 98.69 | 50.99  |
| 10000 | 0.81 | 0.9000 | 0.1000 | 8100 | 1458 | 100 | 13.99 | 0.8958 | 0.9042 | 0.0958 | 0.1042 | 8025 | 1866 | 108 | 8175 | 1733 | 92  | 90.64 | 45.09  |
| 10000 | 0.82 | 0.9000 | 0.1000 | 8100 | 1476 | 100 | 12.42 | 0.8958 | 0.9042 | 0.0958 | 0.1042 | 8025 | 1866 | 108 | 8175 | 1733 | 92  | 82.94 | 39.56  |
| 10000 | 0.83 | 0.9000 | 0.1000 | 8100 | 1494 | 100 | 10.96 | 0.8958 | 0.9042 | 0.0958 | 0.1042 | 8025 | 1866 | 108 | 8175 | 1733 | 92  | 75.58 | 34.40  |
| 10000 | 0.84 | 0.9000 | 0.1000 | 8100 | 1512 | 100 | 9.61  | 0.8958 | 0.9042 | 0.0958 | 0.1042 | 8025 | 1866 | 108 | 8175 | 1733 | 92  | 68.58 | 29.62  |
| 10000 | 0.85 | 0.9000 | 0.1000 | 8100 | 1530 | 100 | 8.36  | 0.8958 | 0.9042 | 0.0958 | 0.1042 | 8025 | 1866 | 108 | 8175 | 1733 | 92  | 61.92 | 25.22  |
| 10000 | 0.86 | 0.9000 | 0.1000 | 8100 | 1548 | 100 | 7.21  | 0.8958 | 0.9042 | 0.0958 | 0.1042 | 8025 | 1866 | 108 | 8175 | 1733 | 92  | 55.61 | 21.19  |
| 10000 | 0.87 | 0.9000 | 0.1000 | 8100 | 1566 | 100 | 6.15  | 0.8958 | 0.9042 | 0.0958 | 0.1042 | 8025 | 1866 | 108 | 8175 | 1733 | 92  | 49.64 | 17.53  |
| 10000 | 0.88 | 0.9000 | 0.1000 | 8100 | 1584 | 100 | 5.19  | 0.8958 | 0.9042 | 0.0958 | 0.1042 | 8025 | 1866 | 108 | 8175 | 1733 | 92  | 44.03 | 14.24  |
| 10000 | 0.89 | 0.9000 | 0.1000 | 8100 | 1602 | 100 | 4.32  | 0.8958 | 0.9042 | 0.0958 | 0.1042 | 8025 | 1866 | 108 | 8175 | 1733 | 92  | 38.76 | 11.33  |
| 10000 | 0.90 | 0.9000 | 0.1000 | 8100 | 1620 | 100 | 3.54  | 0.8958 | 0.9042 | 0.0958 | 0.1042 | 8025 | 1866 | 108 | 8175 | 1733 | 92  | 33.83 | 8.79   |
| 10000 | 0.91 | 0.9000 | 0.1000 | 8100 | 1638 | 100 | 2.84  | 0.8958 | 0.9042 | 0.0958 | 0.1042 | 8025 | 1866 | 108 | 8175 | 1733 | 92  | 29.26 | 6.63   |
| 10000 | 0.92 | 0.9000 | 0.1000 | 8100 | 1656 | 100 | 2.22  | 0.8958 | 0.9042 | 0.0958 | 0.1042 | 8025 | 1866 | 108 | 8175 | 1733 | 92  | 25.03 | 4.84   |
| 10000 | 0.93 | 0.9000 | 0.1000 | 8100 | 1674 | 100 | 1.69  | 0.8958 | 0.9042 | 0.0958 | 0.1042 | 8025 | 1866 | 108 | 8175 | 1733 | 92  | 21.15 | 3.43   |
| 10000 | 0.94 | 0.9000 | 0.1000 | 8100 | 1692 | 100 | 1.23  | 0.8958 | 0.9042 | 0.0958 | 0.1042 | 8025 | 1866 | 108 | 8175 | 1733 | 92  | 17.62 | 2.39   |

|       |      |        |        |      |      |     |       |        |        |        |        |      |      |     |      |      |    |       |        |
|-------|------|--------|--------|------|------|-----|-------|--------|--------|--------|--------|------|------|-----|------|------|----|-------|--------|
| 10000 | 0.95 | 0.9000 | 0.1000 | 8100 | 1710 | 100 | 0.85  | 0.8958 | 0.9042 | 0.0958 | 0.1042 | 8025 | 1866 | 108 | 8175 | 1733 | 92 | 14.43 | 1.72   |
| 10000 | 0.96 | 0.9000 | 0.1000 | 8100 | 1728 | 100 | 0.54  | 0.8958 | 0.9042 | 0.0958 | 0.1042 | 8025 | 1866 | 108 | 8175 | 1733 | 92 | 11.59 | 1.43   |
| 10000 | 0.97 | 0.9000 | 0.1000 | 8100 | 1746 | 100 | 0.30  | 0.8958 | 0.9042 | 0.0958 | 0.1042 | 8025 | 1866 | 108 | 8175 | 1733 | 92 | 9.10  | 1.51   |
| 10000 | 0.98 | 0.9000 | 0.1000 | 8100 | 1764 | 100 | 0.13  | 0.8958 | 0.9042 | 0.0958 | 0.1042 | 8025 | 1866 | 108 | 8175 | 1733 | 92 | 6.95  | 1.96   |
| 10000 | 0.99 | 0.9000 | 0.1000 | 8100 | 1782 | 100 | 0.03  | 0.8958 | 0.9042 | 0.0958 | 0.1042 | 8025 | 1866 | 108 | 8175 | 1733 | 92 | 5.16  | 2.79   |
| 10000 | 1.00 | 0.9000 | 0.1000 | 8100 | 1800 | 100 | 0.00  | 0.8958 | 0.9042 | 0.0958 | 0.1042 | 8025 | 1866 | 108 | 8175 | 1733 | 92 | 3.71  | 3.99   |
| 10000 | 1.01 | 0.9000 | 0.1000 | 8100 | 1818 | 100 | 0.03  | 0.8958 | 0.9042 | 0.0958 | 0.1042 | 8025 | 1866 | 108 | 8175 | 1733 | 92 | 2.60  | 5.57   |
| 10000 | 1.02 | 0.9000 | 0.1000 | 8100 | 1836 | 100 | 0.13  | 0.8958 | 0.9042 | 0.0958 | 0.1042 | 8025 | 1866 | 108 | 8175 | 1733 | 92 | 1.85  | 7.52   |
| 10000 | 1.03 | 0.9000 | 0.1000 | 8100 | 1854 | 100 | 0.28  | 0.8958 | 0.9042 | 0.0958 | 0.1042 | 8025 | 1866 | 108 | 8175 | 1733 | 92 | 1.44  | 9.84   |
| 10000 | 1.04 | 0.9000 | 0.1000 | 8100 | 1872 | 100 | 0.50  | 0.8958 | 0.9042 | 0.0958 | 0.1042 | 8025 | 1866 | 108 | 8175 | 1733 | 92 | 1.38  | 12.54  |
| 10000 | 1.05 | 0.9000 | 0.1000 | 8100 | 1890 | 100 | 0.78  | 0.8958 | 0.9042 | 0.0958 | 0.1042 | 8025 | 1866 | 108 | 8175 | 1733 | 92 | 1.66  | 15.61  |
| 10000 | 1.06 | 0.9000 | 0.1000 | 8100 | 1908 | 100 | 1.11  | 0.8958 | 0.9042 | 0.0958 | 0.1042 | 8025 | 1866 | 108 | 8175 | 1733 | 92 | 2.30  | 19.05  |
| 10000 | 1.07 | 0.9000 | 0.1000 | 8100 | 1926 | 100 | 1.50  | 0.8958 | 0.9042 | 0.0958 | 0.1042 | 8025 | 1866 | 108 | 8175 | 1733 | 92 | 3.28  | 22.87  |
| 10000 | 1.08 | 0.9000 | 0.1000 | 8100 | 1944 | 100 | 1.95  | 0.8958 | 0.9042 | 0.0958 | 0.1042 | 8025 | 1866 | 108 | 8175 | 1733 | 92 | 4.60  | 27.07  |
| 10000 | 1.09 | 0.9000 | 0.1000 | 8100 | 1962 | 100 | 2.45  | 0.8958 | 0.9042 | 0.0958 | 0.1042 | 8025 | 1866 | 108 | 8175 | 1733 | 92 | 6.28  | 31.63  |
| 10000 | 1.10 | 0.9000 | 0.1000 | 8100 | 1980 | 100 | 3.00  | 0.8958 | 0.9042 | 0.0958 | 0.1042 | 8025 | 1866 | 108 | 8175 | 1733 | 92 | 8.30  | 36.57  |
| 10000 | 1.11 | 0.9000 | 0.1000 | 8100 | 1998 | 100 | 3.60  | 0.8958 | 0.9042 | 0.0958 | 0.1042 | 8025 | 1866 | 108 | 8175 | 1733 | 92 | 10.67 | 41.89  |
| 10000 | 1.12 | 0.9000 | 0.1000 | 8100 | 2016 | 100 | 4.26  | 0.8958 | 0.9042 | 0.0958 | 0.1042 | 8025 | 1866 | 108 | 8175 | 1733 | 92 | 13.39 | 47.58  |
| 10000 | 1.13 | 0.9000 | 0.1000 | 8100 | 2034 | 100 | 4.96  | 0.8958 | 0.9042 | 0.0958 | 0.1042 | 8025 | 1866 | 108 | 8175 | 1733 | 92 | 16.45 | 53.64  |
| 10000 | 1.14 | 0.9000 | 0.1000 | 8100 | 2052 | 100 | 5.72  | 0.8958 | 0.9042 | 0.0958 | 0.1042 | 8025 | 1866 | 108 | 8175 | 1733 | 92 | 19.86 | 60.08  |
| 10000 | 1.15 | 0.9000 | 0.1000 | 8100 | 2070 | 100 | 6.52  | 0.8958 | 0.9042 | 0.0958 | 0.1042 | 8025 | 1866 | 108 | 8175 | 1733 | 92 | 23.62 | 66.89  |
| 10000 | 1.16 | 0.9000 | 0.1000 | 8100 | 2088 | 100 | 7.37  | 0.8958 | 0.9042 | 0.0958 | 0.1042 | 8025 | 1866 | 108 | 8175 | 1733 | 92 | 27.73 | 74.07  |
| 10000 | 1.17 | 0.9000 | 0.1000 | 8100 | 2106 | 100 | 8.26  | 0.8958 | 0.9042 | 0.0958 | 0.1042 | 8025 | 1866 | 108 | 8175 | 1733 | 92 | 32.18 | 81.63  |
| 10000 | 1.18 | 0.9000 | 0.1000 | 8100 | 2124 | 100 | 9.20  | 0.8958 | 0.9042 | 0.0958 | 0.1042 | 8025 | 1866 | 108 | 8175 | 1733 | 92 | 36.98 | 89.56  |
| 10000 | 1.19 | 0.9000 | 0.1000 | 8100 | 2142 | 100 | 10.19 | 0.8958 | 0.9042 | 0.0958 | 0.1042 | 8025 | 1866 | 108 | 8175 | 1733 | 92 | 42.13 | 97.87  |
| 10000 | 1.20 | 0.9000 | 0.1000 | 8100 | 2160 | 100 | 11.21 | 0.8958 | 0.9042 | 0.0958 | 0.1042 | 8025 | 1866 | 108 | 8175 | 1733 | 92 | 47.62 | 106.55 |
| 10000 | 0.80 | 0.9500 | 0.0500 | 9025 | 760  | 25  | 4.46  | 0.9470 | 0.9530 | 0.0470 | 0.0530 | 8968 | 1004 | 28  | 9082 | 895  | 22 | 60.09 | 21.24  |
| 10000 | 0.81 | 0.9500 | 0.0500 | 9025 | 770  | 25  | 3.98  | 0.9470 | 0.9530 | 0.0470 | 0.0530 | 8968 | 1004 | 28  | 9082 | 895  | 22 | 55.56 | 18.47  |
| 10000 | 0.82 | 0.9500 | 0.0500 | 9025 | 779  | 25  | 3.53  | 0.9470 | 0.9530 | 0.0470 | 0.0530 | 8968 | 1004 | 28  | 9082 | 895  | 22 | 51.21 | 15.90  |
| 10000 | 0.83 | 0.9500 | 0.0500 | 9025 | 789  | 25  | 3.11  | 0.9470 | 0.9530 | 0.0470 | 0.0530 | 8968 | 1004 | 28  | 9082 | 895  | 22 | 47.04 | 13.53  |
| 10000 | 0.84 | 0.9500 | 0.0500 | 9025 | 798  | 25  | 2.72  | 0.9470 | 0.9530 | 0.0470 | 0.0530 | 8968 | 1004 | 28  | 9082 | 895  | 22 | 43.05 | 11.36  |
| 10000 | 0.85 | 0.9500 | 0.0500 | 9025 | 808  | 25  | 2.36  | 0.9470 | 0.9530 | 0.0470 | 0.0530 | 8968 | 1004 | 28  | 9082 | 895  | 22 | 39.24 | 9.39   |
| 10000 | 0.86 | 0.9500 | 0.0500 | 9025 | 817  | 25  | 2.04  | 0.9470 | 0.9530 | 0.0470 | 0.0530 | 8968 | 1004 | 28  | 9082 | 895  | 22 | 35.60 | 7.63   |
| 10000 | 0.87 | 0.9500 | 0.0500 | 9025 | 827  | 25  | 1.74  | 0.9470 | 0.9530 | 0.0470 | 0.0530 | 8968 | 1004 | 28  | 9082 | 895  | 22 | 32.15 | 6.06   |
| 10000 | 0.88 | 0.9500 | 0.0500 | 9025 | 836  | 25  | 1.46  | 0.9470 | 0.9530 | 0.0470 | 0.0530 | 8968 | 1004 | 28  | 9082 | 895  | 22 | 28.88 | 4.70   |

|       |      |        |        |       |      |    |      |        |        |        |        |       |      |    |       |     |    |       |       |
|-------|------|--------|--------|-------|------|----|------|--------|--------|--------|--------|-------|------|----|-------|-----|----|-------|-------|
| 10000 | 0.89 | 0.9500 | 0.0500 | 9025  | 846  | 25 | 1.22 | 0.9470 | 0.9530 | 0.0470 | 0.0530 | 8968  | 1004 | 28 | 9082  | 895 | 22 | 25.79 | 3.54  |
| 10000 | 0.90 | 0.9500 | 0.0500 | 9025  | 855  | 25 | 0.99 | 0.9470 | 0.9530 | 0.0470 | 0.0530 | 8968  | 1004 | 28 | 9082  | 895 | 22 | 22.87 | 2.58  |
| 10000 | 0.91 | 0.9500 | 0.0500 | 9025  | 865  | 25 | 0.80 | 0.9470 | 0.9530 | 0.0470 | 0.0530 | 8968  | 1004 | 28 | 9082  | 895 | 22 | 20.14 | 1.82  |
| 10000 | 0.92 | 0.9500 | 0.0500 | 9025  | 874  | 25 | 0.62 | 0.9470 | 0.9530 | 0.0470 | 0.0530 | 8968  | 1004 | 28 | 9082  | 895 | 22 | 17.59 | 1.27  |
| 10000 | 0.93 | 0.9500 | 0.0500 | 9025  | 884  | 25 | 0.47 | 0.9470 | 0.9530 | 0.0470 | 0.0530 | 8968  | 1004 | 28 | 9082  | 895 | 22 | 15.22 | .91   |
| 10000 | 0.94 | 0.9500 | 0.0500 | 9025  | 893  | 25 | 0.34 | 0.9470 | 0.9530 | 0.0470 | 0.0530 | 8968  | 1004 | 28 | 9082  | 895 | 22 | 13.02 | .76   |
| 10000 | 0.95 | 0.9500 | 0.0500 | 9025  | 903  | 25 | 0.24 | 0.9470 | 0.9530 | 0.0470 | 0.0530 | 8968  | 1004 | 28 | 9082  | 895 | 22 | 11.01 | .81   |
| 10000 | 0.96 | 0.9500 | 0.0500 | 9025  | 912  | 25 | 0.15 | 0.9470 | 0.9530 | 0.0470 | 0.0530 | 8968  | 1004 | 28 | 9082  | 895 | 22 | 9.17  | 1.06  |
| 10000 | 0.97 | 0.9500 | 0.0500 | 9025  | 922  | 25 | 0.08 | 0.9470 | 0.9530 | 0.0470 | 0.0530 | 8968  | 1004 | 28 | 9082  | 895 | 22 | 7.52  | 1.51  |
| 10000 | 0.98 | 0.9500 | 0.0500 | 9025  | 931  | 25 | 0.04 | 0.9470 | 0.9530 | 0.0470 | 0.0530 | 8968  | 1004 | 28 | 9082  | 895 | 22 | 6.04  | 2.16  |
| 10000 | 0.99 | 0.9500 | 0.0500 | 9025  | 941  | 25 | 0.01 | 0.9470 | 0.9530 | 0.0470 | 0.0530 | 8968  | 1004 | 28 | 9082  | 895 | 22 | 4.75  | 3.02  |
| 10000 | 1.00 | 0.9500 | 0.0500 | 9025  | 950  | 25 | 0.00 | 0.9470 | 0.9530 | 0.0470 | 0.0530 | 8968  | 1004 | 28 | 9082  | 895 | 22 | 3.63  | 4.08  |
| 10000 | 1.01 | 0.9500 | 0.0500 | 9025  | 960  | 25 | 0.01 | 0.9470 | 0.9530 | 0.0470 | 0.0530 | 8968  | 1004 | 28 | 9082  | 895 | 22 | 2.70  | 5.33  |
| 10000 | 1.02 | 0.9500 | 0.0500 | 9025  | 969  | 25 | 0.04 | 0.9470 | 0.9530 | 0.0470 | 0.0530 | 8968  | 1004 | 28 | 9082  | 895 | 22 | 1.94  | 6.79  |
| 10000 | 1.03 | 0.9500 | 0.0500 | 9025  | 979  | 25 | 0.08 | 0.9470 | 0.9530 | 0.0470 | 0.0530 | 8968  | 1004 | 28 | 9082  | 895 | 22 | 1.37  | 8.46  |
| 10000 | 1.04 | 0.9500 | 0.0500 | 9025  | 988  | 25 | 0.14 | 0.9470 | 0.9530 | 0.0470 | 0.0530 | 8968  | 1004 | 28 | 9082  | 895 | 22 | .97   | 10.32 |
| 10000 | 1.05 | 0.9500 | 0.0500 | 9025  | 998  | 25 | 0.22 | 0.9470 | 0.9530 | 0.0470 | 0.0530 | 8968  | 1004 | 28 | 9082  | 895 | 22 | .76   | 12.38 |
| 10000 | 1.06 | 0.9500 | 0.0500 | 9025  | 1007 | 25 | 0.31 | 0.9470 | 0.9530 | 0.0470 | 0.0530 | 8968  | 1004 | 28 | 9082  | 895 | 22 | .72   | 14.65 |
| 10000 | 1.07 | 0.9500 | 0.0500 | 9025  | 1017 | 25 | 0.42 | 0.9470 | 0.9530 | 0.0470 | 0.0530 | 8968  | 1004 | 28 | 9082  | 895 | 22 | .86   | 17.12 |
| 10000 | 1.08 | 0.9500 | 0.0500 | 9025  | 1026 | 25 | 0.54 | 0.9470 | 0.9530 | 0.0470 | 0.0530 | 8968  | 1004 | 28 | 9082  | 895 | 22 | 1.18  | 19.79 |
| 10000 | 1.09 | 0.9500 | 0.0500 | 9025  | 1036 | 25 | 0.68 | 0.9470 | 0.9530 | 0.0470 | 0.0530 | 8968  | 1004 | 28 | 9082  | 895 | 22 | 1.69  | 22.66 |
| 10000 | 1.10 | 0.9500 | 0.0500 | 9025  | 1045 | 25 | 0.83 | 0.9470 | 0.9530 | 0.0470 | 0.0530 | 8968  | 1004 | 28 | 9082  | 895 | 22 | 2.37  | 25.73 |
| 10000 | 1.11 | 0.9500 | 0.0500 | 9025  | 1055 | 25 | 1.00 | 0.9470 | 0.9530 | 0.0470 | 0.0530 | 8968  | 1004 | 28 | 9082  | 895 | 22 | 3.23  | 29.00 |
| 10000 | 1.12 | 0.9500 | 0.0500 | 9025  | 1064 | 25 | 1.18 | 0.9470 | 0.9530 | 0.0470 | 0.0530 | 8968  | 1004 | 28 | 9082  | 895 | 22 | 4.27  | 32.48 |
| 10000 | 1.13 | 0.9500 | 0.0500 | 9025  | 1074 | 25 | 1.37 | 0.9470 | 0.9530 | 0.0470 | 0.0530 | 8968  | 1004 | 28 | 9082  | 895 | 22 | 5.49  | 36.16 |
| 10000 | 1.14 | 0.9500 | 0.0500 | 9025  | 1083 | 25 | 1.58 | 0.9470 | 0.9530 | 0.0470 | 0.0530 | 8968  | 1004 | 28 | 9082  | 895 | 22 | 6.90  | 40.04 |
| 10000 | 1.15 | 0.9500 | 0.0500 | 9025  | 1093 | 25 | 1.80 | 0.9470 | 0.9530 | 0.0470 | 0.0530 | 8968  | 1004 | 28 | 9082  | 895 | 22 | 8.48  | 44.12 |
| 10000 | 1.16 | 0.9500 | 0.0500 | 9025  | 1102 | 25 | 2.03 | 0.9470 | 0.9530 | 0.0470 | 0.0530 | 8968  | 1004 | 28 | 9082  | 895 | 22 | 10.24 | 48.40 |
| 10000 | 1.17 | 0.9500 | 0.0500 | 9025  | 1112 | 25 | 2.27 | 0.9470 | 0.9530 | 0.0470 | 0.0530 | 8968  | 1004 | 28 | 9082  | 895 | 22 | 12.18 | 52.88 |
| 10000 | 1.18 | 0.9500 | 0.0500 | 9025  | 1121 | 25 | 2.53 | 0.9470 | 0.9530 | 0.0470 | 0.0530 | 8968  | 1004 | 28 | 9082  | 895 | 22 | 14.30 | 57.57 |
| 10000 | 1.19 | 0.9500 | 0.0500 | 9025  | 1131 | 25 | 2.80 | 0.9470 | 0.9530 | 0.0470 | 0.0530 | 8968  | 1004 | 28 | 9082  | 895 | 22 | 16.60 | 62.45 |
| 10000 | 1.20 | 0.9500 | 0.0500 | 9025  | 1140 | 25 | 3.08 | 0.9470 | 0.9530 | 0.0470 | 0.0530 | 8968  | 1004 | 28 | 9082  | 895 | 22 | 19.08 | 67.54 |
| 10000 | 0.80 | 1.0000 | 0.0000 | 10000 | 0    | 0  | 3.08 | 1.0000 | 1.0000 | 0.0000 | 0.0000 | 10000 | 0    | 0  | 10000 | 0   | 0  | .     | .     |
| 10000 | 0.81 | 1.0000 | 0.0000 | 10000 | 0    | 0  | 3.08 | 1.0000 | 1.0000 | 0.0000 | 0.0000 | 10000 | 0    | 0  | 10000 | 0   | 0  | .     | .     |
| 10000 | 0.82 | 1.0000 | 0.0000 | 10000 | 0    | 0  | 3.08 | 1.0000 | 1.0000 | 0.0000 | 0.0000 | 10000 | 0    | 0  | 10000 | 0   | 0  | .     | .     |



|       |      |        |        |       |      |       |      |        |        |        |        |       |      |       |       |      |       |       |        |
|-------|------|--------|--------|-------|------|-------|------|--------|--------|--------|--------|-------|------|-------|-------|------|-------|-------|--------|
| 10000 | 1.18 | 1.0000 | 0.0000 | 10000 | 0    | 0     | 3.08 | 1.0000 | 1.0000 | 0.0000 | 0.0000 | 10000 | 0    | 0     | 10000 | 0    | 0     | .     | .      |
| 10000 | 1.19 | 1.0000 | 0.0000 | 10000 | 0    | 0     | 3.08 | 1.0000 | 1.0000 | 0.0000 | 0.0000 | 10000 | 0    | 0     | 10000 | 0    | 0     | .     | .      |
| 10000 | 1.20 | 1.0000 | 0.0000 | 10000 | 0    | 0     | 3.08 | 1.0000 | 1.0000 | 0.0000 | 0.0000 | 10000 | 0    | 0     | 10000 | 0    | 0     | .     | .      |
| 20000 | 0.80 | 0.0500 | 0.9500 | 50    | 1520 | 18050 | 8.92 | 0.0479 | 0.0521 | 0.9479 | 0.9521 | 46    | 1823 | 18131 | 54    | 1977 | 17969 | 51.08 | 106.24 |
| 20000 | 0.81 | 0.0500 | 0.9500 | 50    | 1539 | 18050 | 7.95 | 0.0479 | 0.0521 | 0.9479 | 0.9521 | 46    | 1823 | 18131 | 54    | 1977 | 17969 | 44.97 | 97.64  |
| 20000 | 0.82 | 0.0500 | 0.9500 | 50    | 1558 | 18050 | 7.05 | 0.0479 | 0.0521 | 0.9479 | 0.9521 | 46    | 1823 | 18131 | 54    | 1977 | 17969 | 39.25 | 89.41  |
| 20000 | 0.83 | 0.0500 | 0.9500 | 50    | 1577 | 18050 | 6.22 | 0.0479 | 0.0521 | 0.9479 | 0.9521 | 46    | 1823 | 18131 | 54    | 1977 | 17969 | 33.92 | 81.54  |
| 20000 | 0.84 | 0.0500 | 0.9500 | 50    | 1596 | 18050 | 5.44 | 0.0479 | 0.0521 | 0.9479 | 0.9521 | 46    | 1823 | 18131 | 54    | 1977 | 17969 | 28.99 | 74.04  |
| 20000 | 0.85 | 0.0500 | 0.9500 | 50    | 1615 | 18050 | 4.73 | 0.0479 | 0.0521 | 0.9479 | 0.9521 | 46    | 1823 | 18131 | 54    | 1977 | 17969 | 24.46 | 66.90  |
| 20000 | 0.86 | 0.0500 | 0.9500 | 50    | 1634 | 18050 | 4.07 | 0.0479 | 0.0521 | 0.9479 | 0.9521 | 46    | 1823 | 18131 | 54    | 1977 | 17969 | 20.33 | 60.13  |
| 20000 | 0.87 | 0.0500 | 0.9500 | 50    | 1653 | 18050 | 3.47 | 0.0479 | 0.0521 | 0.9479 | 0.9521 | 46    | 1823 | 18131 | 54    | 1977 | 17969 | 16.59 | 53.73  |
| 20000 | 0.88 | 0.0500 | 0.9500 | 50    | 1672 | 18050 | 2.93 | 0.0479 | 0.0521 | 0.9479 | 0.9521 | 46    | 1823 | 18131 | 54    | 1977 | 17969 | 13.24 | 47.69  |
| 20000 | 0.89 | 0.0500 | 0.9500 | 50    | 1691 | 18050 | 2.43 | 0.0479 | 0.0521 | 0.9479 | 0.9521 | 46    | 1823 | 18131 | 54    | 1977 | 17969 | 10.29 | 42.01  |
| 20000 | 0.90 | 0.0500 | 0.9500 | 50    | 1710 | 18050 | 1.99 | 0.0479 | 0.0521 | 0.9479 | 0.9521 | 46    | 1823 | 18131 | 54    | 1977 | 17969 | 7.74  | 36.70  |
| 20000 | 0.91 | 0.0500 | 0.9500 | 50    | 1729 | 18050 | 1.60 | 0.0479 | 0.0521 | 0.9479 | 0.9521 | 46    | 1823 | 18131 | 54    | 1977 | 17969 | 5.59  | 31.76  |
| 20000 | 0.92 | 0.0500 | 0.9500 | 50    | 1748 | 18050 | 1.25 | 0.0479 | 0.0521 | 0.9479 | 0.9521 | 46    | 1823 | 18131 | 54    | 1977 | 17969 | 3.83  | 27.18  |
| 20000 | 0.93 | 0.0500 | 0.9500 | 50    | 1767 | 18050 | 0.95 | 0.0479 | 0.0521 | 0.9479 | 0.9521 | 46    | 1823 | 18131 | 54    | 1977 | 17969 | 2.46  | 22.96  |
| 20000 | 0.94 | 0.0500 | 0.9500 | 50    | 1786 | 18050 | 0.69 | 0.0479 | 0.0521 | 0.9479 | 0.9521 | 46    | 1823 | 18131 | 54    | 1977 | 17969 | 1.49  | 19.12  |
| 20000 | 0.95 | 0.0500 | 0.9500 | 50    | 1805 | 18050 | 0.47 | 0.0479 | 0.0521 | 0.9479 | 0.9521 | 46    | 1823 | 18131 | 54    | 1977 | 17969 | .92   | 15.63  |
| 20000 | 0.96 | 0.0500 | 0.9500 | 50    | 1824 | 18050 | 0.30 | 0.0479 | 0.0521 | 0.9479 | 0.9521 | 46    | 1823 | 18131 | 54    | 1977 | 17969 | .75   | 12.51  |
| 20000 | 0.97 | 0.0500 | 0.9500 | 50    | 1843 | 18050 | 0.17 | 0.0479 | 0.0521 | 0.9479 | 0.9521 | 46    | 1823 | 18131 | 54    | 1977 | 17969 | .97   | 9.76   |
| 20000 | 0.98 | 0.0500 | 0.9500 | 50    | 1862 | 18050 | 0.07 | 0.0479 | 0.0521 | 0.9479 | 0.9521 | 46    | 1823 | 18131 | 54    | 1977 | 17969 | 1.58  | 7.37   |
| 20000 | 0.99 | 0.0500 | 0.9500 | 50    | 1881 | 18050 | 0.02 | 0.0479 | 0.0521 | 0.9479 | 0.9521 | 46    | 1823 | 18131 | 54    | 1977 | 17969 | 2.60  | 5.35   |
| 20000 | 1.00 | 0.0500 | 0.9500 | 50    | 1900 | 18050 | 0.00 | 0.0479 | 0.0521 | 0.9479 | 0.9521 | 46    | 1823 | 18131 | 54    | 1977 | 17969 | 4.00  | 3.69   |
| 20000 | 1.01 | 0.0500 | 0.9500 | 50    | 1919 | 18050 | 0.02 | 0.0479 | 0.0521 | 0.9479 | 0.9521 | 46    | 1823 | 18131 | 54    | 1977 | 17969 | 5.81  | 2.40   |
| 20000 | 1.02 | 0.0500 | 0.9500 | 50    | 1938 | 18050 | 0.07 | 0.0479 | 0.0521 | 0.9479 | 0.9521 | 46    | 1823 | 18131 | 54    | 1977 | 17969 | 8.01  | 1.47   |
| 20000 | 1.03 | 0.0500 | 0.9500 | 50    | 1957 | 18050 | 0.16 | 0.0479 | 0.0521 | 0.9479 | 0.9521 | 46    | 1823 | 18131 | 54    | 1977 | 17969 | 10.61 | .91    |
| 20000 | 1.04 | 0.0500 | 0.9500 | 50    | 1976 | 18050 | 0.28 | 0.0479 | 0.0521 | 0.9479 | 0.9521 | 46    | 1823 | 18131 | 54    | 1977 | 17969 | 13.60 | .72    |
| 20000 | 1.05 | 0.0500 | 0.9500 | 50    | 1995 | 18050 | 0.43 | 0.0479 | 0.0521 | 0.9479 | 0.9521 | 46    | 1823 | 18131 | 54    | 1977 | 17969 | 16.99 | .89    |
| 20000 | 1.06 | 0.0500 | 0.9500 | 50    | 2014 | 18050 | 0.62 | 0.0479 | 0.0521 | 0.9479 | 0.9521 | 46    | 1823 | 18131 | 54    | 1977 | 17969 | 20.77 | 1.42   |
| 20000 | 1.07 | 0.0500 | 0.9500 | 50    | 2033 | 18050 | 0.83 | 0.0479 | 0.0521 | 0.9479 | 0.9521 | 46    | 1823 | 18131 | 54    | 1977 | 17969 | 24.95 | 2.32   |
| 20000 | 1.08 | 0.0500 | 0.9500 | 50    | 2052 | 18050 | 1.08 | 0.0479 | 0.0521 | 0.9479 | 0.9521 | 46    | 1823 | 18131 | 54    | 1977 | 17969 | 29.53 | 3.58   |
| 20000 | 1.09 | 0.0500 | 0.9500 | 50    | 2071 | 18050 | 1.35 | 0.0479 | 0.0521 | 0.9479 | 0.9521 | 46    | 1823 | 18131 | 54    | 1977 | 17969 | 34.50 | 5.21   |
| 20000 | 1.10 | 0.0500 | 0.9500 | 50    | 2090 | 18050 | 1.66 | 0.0479 | 0.0521 | 0.9479 | 0.9521 | 46    | 1823 | 18131 | 54    | 1977 | 17969 | 39.87 | 7.21   |
| 20000 | 1.11 | 0.0500 | 0.9500 | 50    | 2109 | 18050 | 1.99 | 0.0479 | 0.0521 | 0.9479 | 0.9521 | 46    | 1823 | 18131 | 54    | 1977 | 17969 | 45.64 | 9.57   |



|       |      |        |        |     |      |       |       |        |        |        |        |     |      |       |     |      |       |        |        |
|-------|------|--------|--------|-----|------|-------|-------|--------|--------|--------|--------|-----|------|-------|-----|------|-------|--------|--------|
| 20000 | 1.12 | 0.0500 | 0.9500 | 50  | 2128 | 18050 | 2.35  | 0.0479 | 0.0521 | 0.9479 | 0.9521 | 46  | 1823 | 18131 | 54  | 1977 | 17969 | 51.80  | 12.30  |
| 20000 | 1.13 | 0.0500 | 0.9500 | 50  | 2147 | 18050 | 2.74  | 0.0479 | 0.0521 | 0.9479 | 0.9521 | 46  | 1823 | 18131 | 54  | 1977 | 17969 | 58.36  | 15.39  |
| 20000 | 1.14 | 0.0500 | 0.9500 | 50  | 2166 | 18050 | 3.15  | 0.0479 | 0.0521 | 0.9479 | 0.9521 | 46  | 1823 | 18131 | 54  | 1977 | 17969 | 65.31  | 18.84  |
| 20000 | 1.15 | 0.0500 | 0.9500 | 50  | 2185 | 18050 | 3.59  | 0.0479 | 0.0521 | 0.9479 | 0.9521 | 46  | 1823 | 18131 | 54  | 1977 | 17969 | 72.66  | 22.66  |
| 20000 | 1.16 | 0.0500 | 0.9500 | 50  | 2204 | 18050 | 4.06  | 0.0479 | 0.0521 | 0.9479 | 0.9521 | 46  | 1823 | 18131 | 54  | 1977 | 17969 | 80.41  | 26.85  |
| 20000 | 1.17 | 0.0500 | 0.9500 | 50  | 2223 | 18050 | 4.55  | 0.0479 | 0.0521 | 0.9479 | 0.9521 | 46  | 1823 | 18131 | 54  | 1977 | 17969 | 88.55  | 31.40  |
| 20000 | 1.18 | 0.0500 | 0.9500 | 50  | 2242 | 18050 | 5.06  | 0.0479 | 0.0521 | 0.9479 | 0.9521 | 46  | 1823 | 18131 | 54  | 1977 | 17969 | 97.09  | 36.32  |
| 20000 | 1.19 | 0.0500 | 0.9500 | 50  | 2261 | 18050 | 5.60  | 0.0479 | 0.0521 | 0.9479 | 0.9521 | 46  | 1823 | 18131 | 54  | 1977 | 17969 | 106.02 | 41.60  |
| 20000 | 1.20 | 0.0500 | 0.9500 | 50  | 2280 | 18050 | 6.16  | 0.0479 | 0.0521 | 0.9479 | 0.9521 | 46  | 1823 | 18131 | 54  | 1977 | 17969 | 115.35 | 47.25  |
| 20000 | 0.80 | 0.1000 | 0.9000 | 200 | 2880 | 16200 | 31.34 | 0.0971 | 0.1029 | 0.8971 | 0.9029 | 188 | 3506 | 16306 | 212 | 3694 | 16094 | 113.04 | 180.63 |
| 20000 | 0.81 | 0.1000 | 0.9000 | 200 | 2916 | 16200 | 27.98 | 0.0971 | 0.1029 | 0.8971 | 0.9029 | 188 | 3506 | 16306 | 212 | 3694 | 16094 | 100.56 | 165.12 |
| 20000 | 0.82 | 0.1000 | 0.9000 | 200 | 2952 | 16200 | 24.84 | 0.0971 | 0.1029 | 0.8971 | 0.9029 | 188 | 3506 | 16306 | 212 | 3694 | 16094 | 88.82  | 150.31 |
| 20000 | 0.83 | 0.1000 | 0.9000 | 200 | 2988 | 16200 | 21.93 | 0.0971 | 0.1029 | 0.8971 | 0.9029 | 188 | 3506 | 16306 | 212 | 3694 | 16094 | 77.82  | 136.21 |
| 20000 | 0.84 | 0.1000 | 0.9000 | 200 | 3024 | 16200 | 19.22 | 0.0971 | 0.1029 | 0.8971 | 0.9029 | 188 | 3506 | 16306 | 212 | 3694 | 16094 | 67.56  | 122.80 |
| 20000 | 0.85 | 0.1000 | 0.9000 | 200 | 3060 | 16200 | 16.72 | 0.0971 | 0.1029 | 0.8971 | 0.9029 | 188 | 3506 | 16306 | 212 | 3694 | 16094 | 58.04  | 110.10 |
| 20000 | 0.86 | 0.1000 | 0.9000 | 200 | 3096 | 16200 | 14.42 | 0.0971 | 0.1029 | 0.8971 | 0.9029 | 188 | 3506 | 16306 | 212 | 3694 | 16094 | 49.25  | 98.09  |
| 20000 | 0.87 | 0.1000 | 0.9000 | 200 | 3132 | 16200 | 12.31 | 0.0971 | 0.1029 | 0.8971 | 0.9029 | 188 | 3506 | 16306 | 212 | 3694 | 16094 | 41.21  | 86.79  |
| 20000 | 0.88 | 0.1000 | 0.9000 | 200 | 3168 | 16200 | 10.39 | 0.0971 | 0.1029 | 0.8971 | 0.9029 | 188 | 3506 | 16306 | 212 | 3694 | 16094 | 33.91  | 76.19  |
| 20000 | 0.89 | 0.1000 | 0.9000 | 200 | 3204 | 16200 | 8.64  | 0.0971 | 0.1029 | 0.8971 | 0.9029 | 188 | 3506 | 16306 | 212 | 3694 | 16094 | 27.35  | 66.30  |
| 20000 | 0.90 | 0.1000 | 0.9000 | 200 | 3240 | 16200 | 7.08  | 0.0971 | 0.1029 | 0.8971 | 0.9029 | 188 | 3506 | 16306 | 212 | 3694 | 16094 | 21.52  | 57.10  |
| 20000 | 0.91 | 0.1000 | 0.9000 | 200 | 3276 | 16200 | 5.68  | 0.0971 | 0.1029 | 0.8971 | 0.9029 | 188 | 3506 | 16306 | 212 | 3694 | 16094 | 16.44  | 48.61  |
| 20000 | 0.92 | 0.1000 | 0.9000 | 200 | 3312 | 16200 | 4.45  | 0.0971 | 0.1029 | 0.8971 | 0.9029 | 188 | 3506 | 16306 | 212 | 3694 | 16094 | 12.09  | 40.82  |
| 20000 | 0.93 | 0.1000 | 0.9000 | 200 | 3348 | 16200 | 3.37  | 0.0971 | 0.1029 | 0.8971 | 0.9029 | 188 | 3506 | 16306 | 212 | 3694 | 16094 | 8.48   | 33.73  |
| 20000 | 0.94 | 0.1000 | 0.9000 | 200 | 3384 | 16200 | 2.46  | 0.0971 | 0.1029 | 0.8971 | 0.9029 | 188 | 3506 | 16306 | 212 | 3694 | 16094 | 5.62   | 27.34  |
| 20000 | 0.95 | 0.1000 | 0.9000 | 200 | 3420 | 16200 | 1.69  | 0.0971 | 0.1029 | 0.8971 | 0.9029 | 188 | 3506 | 16306 | 212 | 3694 | 16094 | 3.49   | 21.65  |
| 20000 | 0.96 | 0.1000 | 0.9000 | 200 | 3456 | 16200 | 1.07  | 0.0971 | 0.1029 | 0.8971 | 0.9029 | 188 | 3506 | 16306 | 212 | 3694 | 16094 | 2.10   | 16.67  |
| 20000 | 0.97 | 0.1000 | 0.9000 | 200 | 3492 | 16200 | 0.60  | 0.0971 | 0.1029 | 0.8971 | 0.9029 | 188 | 3506 | 16306 | 212 | 3694 | 16094 | 1.45   | 12.38  |
| 20000 | 0.98 | 0.1000 | 0.9000 | 200 | 3528 | 16200 | 0.26  | 0.0971 | 0.1029 | 0.8971 | 0.9029 | 188 | 3506 | 16306 | 212 | 3694 | 16094 | 1.55   | 8.80   |
| 20000 | 0.99 | 0.1000 | 0.9000 | 200 | 3564 | 16200 | 0.07  | 0.0971 | 0.1029 | 0.8971 | 0.9029 | 188 | 3506 | 16306 | 212 | 3694 | 16094 | 2.38   | 5.92   |
| 20000 | 1.00 | 0.1000 | 0.9000 | 200 | 3600 | 16200 | 0.00  | 0.0971 | 0.1029 | 0.8971 | 0.9029 | 188 | 3506 | 16306 | 212 | 3694 | 16094 | 3.95   | 3.74   |
| 20000 | 1.01 | 0.1000 | 0.9000 | 200 | 3636 | 16200 | 0.06  | 0.0971 | 0.1029 | 0.8971 | 0.9029 | 188 | 3506 | 16306 | 212 | 3694 | 16094 | 6.25   | 2.27   |
| 20000 | 1.02 | 0.1000 | 0.9000 | 200 | 3672 | 16200 | 0.26  | 0.0971 | 0.1029 | 0.8971 | 0.9029 | 188 | 3506 | 16306 | 212 | 3694 | 16094 | 9.30   | 1.49   |
| 20000 | 1.03 | 0.1000 | 0.9000 | 200 | 3708 | 16200 | 0.57  | 0.0971 | 0.1029 | 0.8971 | 0.9029 | 188 | 3506 | 16306 | 212 | 3694 | 16094 | 13.09  | 1.42   |
| 20000 | 1.04 | 0.1000 | 0.9000 | 200 | 3744 | 16200 | 1.00  | 0.0971 | 0.1029 | 0.8971 | 0.9029 | 188 | 3506 | 16306 | 212 | 3694 | 16094 | 17.62  | 2.05   |
| 20000 | 1.05 | 0.1000 | 0.9000 | 200 | 3780 | 16200 | 1.56  | 0.0971 | 0.1029 | 0.8971 | 0.9029 | 188 | 3506 | 16306 | 212 | 3694 | 16094 | 22.88  | 3.38   |

|       |      |        |        |     |      |       |       |        |        |        |        |     |      |       |     |      |       |        |        |
|-------|------|--------|--------|-----|------|-------|-------|--------|--------|--------|--------|-----|------|-------|-----|------|-------|--------|--------|
| 20000 | 1.06 | 0.1000 | 0.9000 | 200 | 3816 | 16200 | 2.23  | 0.0971 | 0.1029 | 0.8971 | 0.9029 | 188 | 3506 | 16306 | 212 | 3694 | 16094 | 28.89  | 5.41   |
| 20000 | 1.07 | 0.1000 | 0.9000 | 200 | 3852 | 16200 | 3.01  | 0.0971 | 0.1029 | 0.8971 | 0.9029 | 188 | 3506 | 16306 | 212 | 3694 | 16094 | 35.64  | 8.15   |
| 20000 | 1.08 | 0.1000 | 0.9000 | 200 | 3888 | 16200 | 3.90  | 0.0971 | 0.1029 | 0.8971 | 0.9029 | 188 | 3506 | 16306 | 212 | 3694 | 16094 | 43.12  | 11.58  |
| 20000 | 1.09 | 0.1000 | 0.9000 | 200 | 3924 | 16200 | 4.90  | 0.0971 | 0.1029 | 0.8971 | 0.9029 | 188 | 3506 | 16306 | 212 | 3694 | 16094 | 51.35  | 15.72  |
| 20000 | 1.10 | 0.1000 | 0.9000 | 200 | 3960 | 16200 | 6.00  | 0.0971 | 0.1029 | 0.8971 | 0.9029 | 188 | 3506 | 16306 | 212 | 3694 | 16094 | 60.31  | 20.56  |
| 20000 | 1.11 | 0.1000 | 0.9000 | 200 | 3996 | 16200 | 7.21  | 0.0971 | 0.1029 | 0.8971 | 0.9029 | 188 | 3506 | 16306 | 212 | 3694 | 16094 | 70.01  | 26.10  |
| 20000 | 1.12 | 0.1000 | 0.9000 | 200 | 4032 | 16200 | 8.52  | 0.0971 | 0.1029 | 0.8971 | 0.9029 | 188 | 3506 | 16306 | 212 | 3694 | 16094 | 80.45  | 32.34  |
| 20000 | 1.13 | 0.1000 | 0.9000 | 200 | 4068 | 16200 | 9.93  | 0.0971 | 0.1029 | 0.8971 | 0.9029 | 188 | 3506 | 16306 | 212 | 3694 | 16094 | 91.64  | 39.29  |
| 20000 | 1.14 | 0.1000 | 0.9000 | 200 | 4104 | 16200 | 11.44 | 0.0971 | 0.1029 | 0.8971 | 0.9029 | 188 | 3506 | 16306 | 212 | 3694 | 16094 | 103.56 | 46.93  |
| 20000 | 1.15 | 0.1000 | 0.9000 | 200 | 4140 | 16200 | 13.04 | 0.0971 | 0.1029 | 0.8971 | 0.9029 | 188 | 3506 | 16306 | 212 | 3694 | 16094 | 116.22 | 55.28  |
| 20000 | 1.16 | 0.1000 | 0.9000 | 200 | 4176 | 16200 | 14.74 | 0.0971 | 0.1029 | 0.8971 | 0.9029 | 188 | 3506 | 16306 | 212 | 3694 | 16094 | 129.62 | 64.33  |
| 20000 | 1.17 | 0.1000 | 0.9000 | 200 | 4212 | 16200 | 16.52 | 0.0971 | 0.1029 | 0.8971 | 0.9029 | 188 | 3506 | 16306 | 212 | 3694 | 16094 | 143.76 | 74.08  |
| 20000 | 1.18 | 0.1000 | 0.9000 | 200 | 4248 | 16200 | 18.40 | 0.0971 | 0.1029 | 0.8971 | 0.9029 | 188 | 3506 | 16306 | 212 | 3694 | 16094 | 158.64 | 84.54  |
| 20000 | 1.19 | 0.1000 | 0.9000 | 200 | 4284 | 16200 | 20.37 | 0.0971 | 0.1029 | 0.8971 | 0.9029 | 188 | 3506 | 16306 | 212 | 3694 | 16094 | 174.25 | 95.69  |
| 20000 | 1.20 | 0.1000 | 0.9000 | 200 | 4320 | 16200 | 22.43 | 0.0971 | 0.1029 | 0.8971 | 0.9029 | 188 | 3506 | 16306 | 212 | 3694 | 16094 | 190.61 | 107.55 |
| 20000 | 0.80 | 0.1500 | 0.8500 | 450 | 4080 | 14450 | 61.69 | 0.1465 | 0.1535 | 0.8465 | 0.8535 | 429 | 5002 | 14569 | 471 | 5197 | 14331 | 171.77 | 242.21 |
| 20000 | 0.81 | 0.1500 | 0.8500 | 450 | 4131 | 14450 | 55.14 | 0.1465 | 0.1535 | 0.8465 | 0.8535 | 429 | 5002 | 14569 | 471 | 5197 | 14331 | 153.50 | 220.78 |
| 20000 | 0.82 | 0.1500 | 0.8500 | 450 | 4182 | 14450 | 49.02 | 0.1465 | 0.1535 | 0.8465 | 0.8535 | 429 | 5002 | 14569 | 471 | 5197 | 14331 | 136.26 | 200.35 |
| 20000 | 0.83 | 0.1500 | 0.8500 | 450 | 4233 | 14450 | 43.31 | 0.1465 | 0.1535 | 0.8465 | 0.8535 | 429 | 5002 | 14569 | 471 | 5197 | 14331 | 120.07 | 180.92 |
| 20000 | 0.84 | 0.1500 | 0.8500 | 450 | 4284 | 14450 | 38.01 | 0.1465 | 0.1535 | 0.8465 | 0.8535 | 429 | 5002 | 14569 | 471 | 5197 | 14331 | 104.92 | 162.49 |
| 20000 | 0.85 | 0.1500 | 0.8500 | 450 | 4335 | 14450 | 33.10 | 0.1465 | 0.1535 | 0.8465 | 0.8535 | 429 | 5002 | 14569 | 471 | 5197 | 14331 | 90.80  | 145.07 |
| 20000 | 0.86 | 0.1500 | 0.8500 | 450 | 4386 | 14450 | 28.58 | 0.1465 | 0.1535 | 0.8465 | 0.8535 | 429 | 5002 | 14569 | 471 | 5197 | 14331 | 77.73  | 128.64 |
| 20000 | 0.87 | 0.1500 | 0.8500 | 450 | 4437 | 14450 | 24.42 | 0.1465 | 0.1535 | 0.8465 | 0.8535 | 429 | 5002 | 14569 | 471 | 5197 | 14331 | 65.70  | 113.22 |
| 20000 | 0.88 | 0.1500 | 0.8500 | 450 | 4488 | 14450 | 20.63 | 0.1465 | 0.1535 | 0.8465 | 0.8535 | 429 | 5002 | 14569 | 471 | 5197 | 14331 | 54.71  | 98.79  |
| 20000 | 0.89 | 0.1500 | 0.8500 | 450 | 4539 | 14450 | 17.18 | 0.1465 | 0.1535 | 0.8465 | 0.8535 | 429 | 5002 | 14569 | 471 | 5197 | 14331 | 44.75  | 85.37  |
| 20000 | 0.90 | 0.1500 | 0.8500 | 450 | 4590 | 14450 | 14.08 | 0.1465 | 0.1535 | 0.8465 | 0.8535 | 429 | 5002 | 14569 | 471 | 5197 | 14331 | 35.84  | 72.95  |
| 20000 | 0.91 | 0.1500 | 0.8500 | 450 | 4641 | 14450 | 11.31 | 0.1465 | 0.1535 | 0.8465 | 0.8535 | 429 | 5002 | 14569 | 471 | 5197 | 14331 | 27.97  | 61.52  |
| 20000 | 0.92 | 0.1500 | 0.8500 | 450 | 4692 | 14450 | 8.86  | 0.1465 | 0.1535 | 0.8465 | 0.8535 | 429 | 5002 | 14569 | 471 | 5197 | 14331 | 21.13  | 51.10  |
| 20000 | 0.93 | 0.1500 | 0.8500 | 450 | 4743 | 14450 | 6.73  | 0.1465 | 0.1535 | 0.8465 | 0.8535 | 429 | 5002 | 14569 | 471 | 5197 | 14331 | 15.34  | 41.68  |
| 20000 | 0.94 | 0.1500 | 0.8500 | 450 | 4794 | 14450 | 4.90  | 0.1465 | 0.1535 | 0.8465 | 0.8535 | 429 | 5002 | 14569 | 471 | 5197 | 14331 | 10.59  | 33.26  |
| 20000 | 0.95 | 0.1500 | 0.8500 | 450 | 4845 | 14450 | 3.38  | 0.1465 | 0.1535 | 0.8465 | 0.8535 | 429 | 5002 | 14569 | 471 | 5197 | 14331 | 6.88   | 25.85  |
| 20000 | 0.96 | 0.1500 | 0.8500 | 450 | 4896 | 14450 | 2.15  | 0.1465 | 0.1535 | 0.8465 | 0.8535 | 429 | 5002 | 14569 | 471 | 5197 | 14331 | 4.21   | 19.43  |
| 20000 | 0.97 | 0.1500 | 0.8500 | 450 | 4947 | 14450 | 1.20  | 0.1465 | 0.1535 | 0.8465 | 0.8535 | 429 | 5002 | 14569 | 471 | 5197 | 14331 | 2.57   | 14.01  |
| 20000 | 0.98 | 0.1500 | 0.8500 | 450 | 4998 | 14450 | 0.53  | 0.1465 | 0.1535 | 0.8465 | 0.8535 | 429 | 5002 | 14569 | 471 | 5197 | 14331 | 1.98   | 9.60   |
| 20000 | 0.99 | 0.1500 | 0.8500 | 450 | 5049 | 14450 | 0.13  | 0.1465 | 0.1535 | 0.8465 | 0.8535 | 429 | 5002 | 14569 | 471 | 5197 | 14331 | 2.43   | 6.18   |

|       |      |        |        |     |      |       |       |        |        |        |        |     |      |       |     |      |       |        |        |
|-------|------|--------|--------|-----|------|-------|-------|--------|--------|--------|--------|-----|------|-------|-----|------|-------|--------|--------|
| 20000 | 1.00 | 0.1500 | 0.8500 | 450 | 5100 | 14450 | 0.00  | 0.1465 | 0.1535 | 0.8465 | 0.8535 | 429 | 5002 | 14569 | 471 | 5197 | 14331 | 3.92   | 3.77   |
| 20000 | 1.01 | 0.1500 | 0.8500 | 450 | 5151 | 14450 | 0.13  | 0.1465 | 0.1535 | 0.8465 | 0.8535 | 429 | 5002 | 14569 | 471 | 5197 | 14331 | 6.45   | 2.36   |
| 20000 | 1.02 | 0.1500 | 0.8500 | 450 | 5202 | 14450 | 0.51  | 0.1465 | 0.1535 | 0.8465 | 0.8535 | 429 | 5002 | 14569 | 471 | 5197 | 14331 | 10.01  | 1.94   |
| 20000 | 1.03 | 0.1500 | 0.8500 | 450 | 5253 | 14450 | 1.15  | 0.1465 | 0.1535 | 0.8465 | 0.8535 | 429 | 5002 | 14569 | 471 | 5197 | 14331 | 14.62  | 2.53   |
| 20000 | 1.04 | 0.1500 | 0.8500 | 450 | 5304 | 14450 | 2.02  | 0.1465 | 0.1535 | 0.8465 | 0.8535 | 429 | 5002 | 14569 | 471 | 5197 | 14331 | 20.27  | 4.12   |
| 20000 | 1.05 | 0.1500 | 0.8500 | 450 | 5355 | 14450 | 3.14  | 0.1465 | 0.1535 | 0.8465 | 0.8535 | 429 | 5002 | 14569 | 471 | 5197 | 14331 | 26.96  | 6.71   |
| 20000 | 1.06 | 0.1500 | 0.8500 | 450 | 5406 | 14450 | 4.48  | 0.1465 | 0.1535 | 0.8465 | 0.8535 | 429 | 5002 | 14569 | 471 | 5197 | 14331 | 34.69  | 10.31  |
| 20000 | 1.07 | 0.1500 | 0.8500 | 450 | 5457 | 14450 | 6.06  | 0.1465 | 0.1535 | 0.8465 | 0.8535 | 429 | 5002 | 14569 | 471 | 5197 | 14331 | 43.46  | 14.90  |
| 20000 | 1.08 | 0.1500 | 0.8500 | 450 | 5508 | 14450 | 7.86  | 0.1465 | 0.1535 | 0.8465 | 0.8535 | 429 | 5002 | 14569 | 471 | 5197 | 14331 | 53.27  | 20.49  |
| 20000 | 1.09 | 0.1500 | 0.8500 | 450 | 5559 | 14450 | 9.89  | 0.1465 | 0.1535 | 0.8465 | 0.8535 | 429 | 5002 | 14569 | 471 | 5197 | 14331 | 64.11  | 27.09  |
| 20000 | 1.10 | 0.1500 | 0.8500 | 450 | 5610 | 14450 | 12.12 | 0.1465 | 0.1535 | 0.8465 | 0.8535 | 429 | 5002 | 14569 | 471 | 5197 | 14331 | 76.00  | 34.68  |
| 20000 | 1.11 | 0.1500 | 0.8500 | 450 | 5661 | 14450 | 14.57 | 0.1465 | 0.1535 | 0.8465 | 0.8535 | 429 | 5002 | 14569 | 471 | 5197 | 14331 | 88.93  | 43.28  |
| 20000 | 1.12 | 0.1500 | 0.8500 | 450 | 5712 | 14450 | 17.23 | 0.1465 | 0.1535 | 0.8465 | 0.8535 | 429 | 5002 | 14569 | 471 | 5197 | 14331 | 102.90 | 52.87  |
| 20000 | 1.13 | 0.1500 | 0.8500 | 450 | 5763 | 14450 | 20.09 | 0.1465 | 0.1535 | 0.8465 | 0.8535 | 429 | 5002 | 14569 | 471 | 5197 | 14331 | 117.91 | 63.47  |
| 20000 | 1.14 | 0.1500 | 0.8500 | 450 | 5814 | 14450 | 23.16 | 0.1465 | 0.1535 | 0.8465 | 0.8535 | 429 | 5002 | 14569 | 471 | 5197 | 14331 | 133.96 | 75.07  |
| 20000 | 1.15 | 0.1500 | 0.8500 | 450 | 5865 | 14450 | 26.42 | 0.1465 | 0.1535 | 0.8465 | 0.8535 | 429 | 5002 | 14569 | 471 | 5197 | 14331 | 151.05 | 87.67  |
| 20000 | 1.16 | 0.1500 | 0.8500 | 450 | 5916 | 14450 | 29.87 | 0.1465 | 0.1535 | 0.8465 | 0.8535 | 429 | 5002 | 14569 | 471 | 5197 | 14331 | 169.18 | 101.27 |
| 20000 | 1.17 | 0.1500 | 0.8500 | 450 | 5967 | 14450 | 33.51 | 0.1465 | 0.1535 | 0.8465 | 0.8535 | 429 | 5002 | 14569 | 471 | 5197 | 14331 | 188.35 | 115.87 |
| 20000 | 1.18 | 0.1500 | 0.8500 | 450 | 6018 | 14450 | 37.34 | 0.1465 | 0.1535 | 0.8465 | 0.8535 | 429 | 5002 | 14569 | 471 | 5197 | 14331 | 208.56 | 131.47 |
| 20000 | 1.19 | 0.1500 | 0.8500 | 450 | 6069 | 14450 | 41.36 | 0.1465 | 0.1535 | 0.8465 | 0.8535 | 429 | 5002 | 14569 | 471 | 5197 | 14331 | 229.81 | 148.07 |
| 20000 | 1.20 | 0.1500 | 0.8500 | 450 | 6120 | 14450 | 45.55 | 0.1465 | 0.1535 | 0.8465 | 0.8535 | 429 | 5002 | 14569 | 471 | 5197 | 14331 | 252.10 | 165.68 |
| 20000 | 0.80 | 0.2000 | 0.8000 | 800 | 5120 | 12800 | 95.51 | 0.1961 | 0.2039 | 0.7961 | 0.8039 | 769 | 6305 | 12926 | 832 | 6493 | 12675 | 225.30 | 292.95 |
| 20000 | 0.81 | 0.2000 | 0.8000 | 800 | 5184 | 12800 | 85.46 | 0.1961 | 0.2039 | 0.7961 | 0.8039 | 769 | 6305 | 12926 | 832 | 6493 | 12675 | 201.88 | 266.51 |
| 20000 | 0.82 | 0.2000 | 0.8000 | 800 | 5248 | 12800 | 76.05 | 0.1961 | 0.2039 | 0.7961 | 0.8039 | 769 | 6305 | 12926 | 832 | 6493 | 12675 | 179.77 | 241.33 |
| 20000 | 0.83 | 0.2000 | 0.8000 | 800 | 5312 | 12800 | 67.27 | 0.1961 | 0.2039 | 0.7961 | 0.8039 | 769 | 6305 | 12926 | 832 | 6493 | 12675 | 158.96 | 217.41 |
| 20000 | 0.84 | 0.2000 | 0.8000 | 800 | 5376 | 12800 | 59.09 | 0.1961 | 0.2039 | 0.7961 | 0.8039 | 769 | 6305 | 12926 | 832 | 6493 | 12675 | 139.44 | 194.75 |
| 20000 | 0.85 | 0.2000 | 0.8000 | 800 | 5440 | 12800 | 51.51 | 0.1961 | 0.2039 | 0.7961 | 0.8039 | 769 | 6305 | 12926 | 832 | 6493 | 12675 | 121.23 | 173.35 |
| 20000 | 0.86 | 0.2000 | 0.8000 | 800 | 5504 | 12800 | 44.51 | 0.1961 | 0.2039 | 0.7961 | 0.8039 | 769 | 6305 | 12926 | 832 | 6493 | 12675 | 104.31 | 153.21 |
| 20000 | 0.87 | 0.2000 | 0.8000 | 800 | 5568 | 12800 | 38.08 | 0.1961 | 0.2039 | 0.7961 | 0.8039 | 769 | 6305 | 12926 | 832 | 6493 | 12675 | 88.69  | 134.34 |
| 20000 | 0.88 | 0.2000 | 0.8000 | 800 | 5632 | 12800 | 32.19 | 0.1961 | 0.2039 | 0.7961 | 0.8039 | 769 | 6305 | 12926 | 832 | 6493 | 12675 | 74.38  | 116.73 |
| 20000 | 0.89 | 0.2000 | 0.8000 | 800 | 5696 | 12800 | 26.84 | 0.1961 | 0.2039 | 0.7961 | 0.8039 | 769 | 6305 | 12926 | 832 | 6493 | 12675 | 61.36  | 100.38 |
| 20000 | 0.90 | 0.2000 | 0.8000 | 800 | 5760 | 12800 | 22.01 | 0.1961 | 0.2039 | 0.7961 | 0.8039 | 769 | 6305 | 12926 | 832 | 6493 | 12675 | 49.64  | 85.29  |
| 20000 | 0.91 | 0.2000 | 0.8000 | 800 | 5824 | 12800 | 17.69 | 0.1961 | 0.2039 | 0.7961 | 0.8039 | 769 | 6305 | 12926 | 832 | 6493 | 12675 | 39.22  | 71.46  |
| 20000 | 0.92 | 0.2000 | 0.8000 | 800 | 5888 | 12800 | 13.88 | 0.1961 | 0.2039 | 0.7961 | 0.8039 | 769 | 6305 | 12926 | 832 | 6493 | 12675 | 30.10  | 58.90  |
| 20000 | 0.93 | 0.2000 | 0.8000 | 800 | 5952 | 12800 | 10.54 | 0.1961 | 0.2039 | 0.7961 | 0.8039 | 769 | 6305 | 12926 | 832 | 6493 | 12675 | 22.27  | 47.59  |

|       |      |        |        |      |      |       |        |        |        |        |        |      |      |       |      |      |       |        |        |
|-------|------|--------|--------|------|------|-------|--------|--------|--------|--------|--------|------|------|-------|------|------|-------|--------|--------|
| 20000 | 0.94 | 0.2000 | 0.8000 | 800  | 6016 | 12800 | 7.69   | 0.1961 | 0.2039 | 0.7961 | 0.8039 | 769  | 6305 | 12926 | 832  | 6493 | 12675 | 15.75  | 37.55  |
| 20000 | 0.95 | 0.2000 | 0.8000 | 800  | 6080 | 12800 | 5.30   | 0.1961 | 0.2039 | 0.7961 | 0.8039 | 769  | 6305 | 12926 | 832  | 6493 | 12675 | 10.53  | 28.77  |
| 20000 | 0.96 | 0.2000 | 0.8000 | 800  | 6144 | 12800 | 3.37   | 0.1961 | 0.2039 | 0.7961 | 0.8039 | 769  | 6305 | 12926 | 832  | 6493 | 12675 | 6.60   | 21.25  |
| 20000 | 0.97 | 0.2000 | 0.8000 | 800  | 6208 | 12800 | 1.88   | 0.1961 | 0.2039 | 0.7961 | 0.8039 | 769  | 6305 | 12926 | 832  | 6493 | 12675 | 3.98   | 14.99  |
| 20000 | 0.98 | 0.2000 | 0.8000 | 800  | 6272 | 12800 | 0.83   | 0.1961 | 0.2039 | 0.7961 | 0.8039 | 769  | 6305 | 12926 | 832  | 6493 | 12675 | 2.65   | 9.99   |
| 20000 | 0.99 | 0.2000 | 0.8000 | 800  | 6336 | 12800 | 0.21   | 0.1961 | 0.2039 | 0.7961 | 0.8039 | 769  | 6305 | 12926 | 832  | 6493 | 12675 | 2.63   | 6.26   |
| 20000 | 1.00 | 0.2000 | 0.8000 | 800  | 6400 | 12800 | 0.00   | 0.1961 | 0.2039 | 0.7961 | 0.8039 | 769  | 6305 | 12926 | 832  | 6493 | 12675 | 3.90   | 3.79   |
| 20000 | 1.01 | 0.2000 | 0.8000 | 800  | 6464 | 12800 | 0.20   | 0.1961 | 0.2039 | 0.7961 | 0.8039 | 769  | 6305 | 12926 | 832  | 6493 | 12675 | 6.47   | 2.57   |
| 20000 | 1.02 | 0.2000 | 0.8000 | 800  | 6528 | 12800 | 0.81   | 0.1961 | 0.2039 | 0.7961 | 0.8039 | 769  | 6305 | 12926 | 832  | 6493 | 12675 | 10.34  | 2.62   |
| 20000 | 1.03 | 0.2000 | 0.8000 | 800  | 6592 | 12800 | 1.81   | 0.1961 | 0.2039 | 0.7961 | 0.8039 | 769  | 6305 | 12926 | 832  | 6493 | 12675 | 15.51  | 3.94   |
| 20000 | 1.04 | 0.2000 | 0.8000 | 800  | 6656 | 12800 | 3.19   | 0.1961 | 0.2039 | 0.7961 | 0.8039 | 769  | 6305 | 12926 | 832  | 6493 | 12675 | 21.98  | 6.51   |
| 20000 | 1.05 | 0.2000 | 0.8000 | 800  | 6720 | 12800 | 4.95   | 0.1961 | 0.2039 | 0.7961 | 0.8039 | 769  | 6305 | 12926 | 832  | 6493 | 12675 | 29.75  | 10.34  |
| 20000 | 1.06 | 0.2000 | 0.8000 | 800  | 6784 | 12800 | 7.09   | 0.1961 | 0.2039 | 0.7961 | 0.8039 | 769  | 6305 | 12926 | 832  | 6493 | 12675 | 38.82  | 15.44  |
| 20000 | 1.07 | 0.2000 | 0.8000 | 800  | 6848 | 12800 | 9.59   | 0.1961 | 0.2039 | 0.7961 | 0.8039 | 769  | 6305 | 12926 | 832  | 6493 | 12675 | 49.19  | 21.80  |
| 20000 | 1.08 | 0.2000 | 0.8000 | 800  | 6912 | 12800 | 12.44  | 0.1961 | 0.2039 | 0.7961 | 0.8039 | 769  | 6305 | 12926 | 832  | 6493 | 12675 | 60.85  | 29.42  |
| 20000 | 1.09 | 0.2000 | 0.8000 | 800  | 6976 | 12800 | 15.65  | 0.1961 | 0.2039 | 0.7961 | 0.8039 | 769  | 6305 | 12926 | 832  | 6493 | 12675 | 73.82  | 38.30  |
| 20000 | 1.10 | 0.2000 | 0.8000 | 800  | 7040 | 12800 | 19.20  | 0.1961 | 0.2039 | 0.7961 | 0.8039 | 769  | 6305 | 12926 | 832  | 6493 | 12675 | 88.08  | 48.44  |
| 20000 | 1.11 | 0.2000 | 0.8000 | 800  | 7104 | 12800 | 23.09  | 0.1961 | 0.2039 | 0.7961 | 0.8039 | 769  | 6305 | 12926 | 832  | 6493 | 12675 | 103.65 | 59.85  |
| 20000 | 1.12 | 0.2000 | 0.8000 | 800  | 7168 | 12800 | 27.32  | 0.1961 | 0.2039 | 0.7961 | 0.8039 | 769  | 6305 | 12926 | 832  | 6493 | 12675 | 120.51 | 72.51  |
| 20000 | 1.13 | 0.2000 | 0.8000 | 800  | 7232 | 12800 | 31.87  | 0.1961 | 0.2039 | 0.7961 | 0.8039 | 769  | 6305 | 12926 | 832  | 6493 | 12675 | 138.67 | 86.44  |
| 20000 | 1.14 | 0.2000 | 0.8000 | 800  | 7296 | 12800 | 36.74  | 0.1961 | 0.2039 | 0.7961 | 0.8039 | 769  | 6305 | 12926 | 832  | 6493 | 12675 | 158.14 | 101.63 |
| 20000 | 1.15 | 0.2000 | 0.8000 | 800  | 7360 | 12800 | 41.94  | 0.1961 | 0.2039 | 0.7961 | 0.8039 | 769  | 6305 | 12926 | 832  | 6493 | 12675 | 178.90 | 118.08 |
| 20000 | 1.16 | 0.2000 | 0.8000 | 800  | 7424 | 12800 | 47.44  | 0.1961 | 0.2039 | 0.7961 | 0.8039 | 769  | 6305 | 12926 | 832  | 6493 | 12675 | 200.96 | 135.79 |
| 20000 | 1.17 | 0.2000 | 0.8000 | 800  | 7488 | 12800 | 53.25  | 0.1961 | 0.2039 | 0.7961 | 0.8039 | 769  | 6305 | 12926 | 832  | 6493 | 12675 | 224.32 | 154.76 |
| 20000 | 1.18 | 0.2000 | 0.8000 | 800  | 7552 | 12800 | 59.36  | 0.1961 | 0.2039 | 0.7961 | 0.8039 | 769  | 6305 | 12926 | 832  | 6493 | 12675 | 248.98 | 175.00 |
| 20000 | 1.19 | 0.2000 | 0.8000 | 800  | 7616 | 12800 | 65.77  | 0.1961 | 0.2039 | 0.7961 | 0.8039 | 769  | 6305 | 12926 | 832  | 6493 | 12675 | 274.93 | 196.50 |
| 20000 | 1.20 | 0.2000 | 0.8000 | 800  | 7680 | 12800 | 72.47  | 0.1961 | 0.2039 | 0.7961 | 0.8039 | 769  | 6305 | 12926 | 832  | 6493 | 12675 | 302.19 | 219.25 |
| 20000 | 0.80 | 0.2500 | 0.7500 | 1250 | 6000 | 11250 | 129.27 | 0.2458 | 0.2542 | 0.7458 | 0.7542 | 1208 | 7414 | 11378 | 1293 | 7584 | 11123 | 272.72 | 333.76 |
| 20000 | 0.81 | 0.2500 | 0.7500 | 1250 | 6075 | 11250 | 115.77 | 0.2458 | 0.2542 | 0.7458 | 0.7542 | 1208 | 7414 | 11378 | 1293 | 7584 | 11123 | 244.86 | 303.17 |
| 20000 | 0.82 | 0.2500 | 0.7500 | 1250 | 6150 | 11250 | 103.12 | 0.2458 | 0.2542 | 0.7458 | 0.7542 | 1208 | 7414 | 11378 | 1293 | 7584 | 11123 | 218.52 | 274.06 |
| 20000 | 0.83 | 0.2500 | 0.7500 | 1250 | 6225 | 11250 | 91.29  | 0.2458 | 0.2542 | 0.7458 | 0.7542 | 1208 | 7414 | 11378 | 1293 | 7584 | 11123 | 193.70 | 246.44 |
| 20000 | 0.84 | 0.2500 | 0.7500 | 1250 | 6300 | 11250 | 80.27  | 0.2458 | 0.2542 | 0.7458 | 0.7542 | 1208 | 7414 | 11378 | 1293 | 7584 | 11123 | 170.40 | 220.30 |
| 20000 | 0.85 | 0.2500 | 0.7500 | 1250 | 6375 | 11250 | 70.03  | 0.2458 | 0.2542 | 0.7458 | 0.7542 | 1208 | 7414 | 11378 | 1293 | 7584 | 11123 | 148.61 | 195.64 |
| 20000 | 0.86 | 0.2500 | 0.7500 | 1250 | 6450 | 11250 | 60.56  | 0.2458 | 0.2542 | 0.7458 | 0.7542 | 1208 | 7414 | 11378 | 1293 | 7584 | 11123 | 128.34 | 172.47 |
| 20000 | 0.87 | 0.2500 | 0.7500 | 1250 | 6525 | 11250 | 51.84  | 0.2458 | 0.2542 | 0.7458 | 0.7542 | 1208 | 7414 | 11378 | 1293 | 7584 | 11123 | 109.59 | 150.78 |

|       |      |        |        |      |      |       |        |        |        |        |        |      |      |       |      |      |       |        |        |
|-------|------|--------|--------|------|------|-------|--------|--------|--------|--------|--------|------|------|-------|------|------|-------|--------|--------|
| 20000 | 0.88 | 0.2500 | 0.7500 | 1250 | 6600 | 11250 | 43.86  | 0.2458 | 0.2542 | 0.7458 | 0.7542 | 1208 | 7414 | 11378 | 1293 | 7584 | 11123 | 92.35  | 130.57 |
| 20000 | 0.89 | 0.2500 | 0.7500 | 1250 | 6675 | 11250 | 36.60  | 0.2458 | 0.2542 | 0.7458 | 0.7542 | 1208 | 7414 | 11378 | 1293 | 7584 | 11123 | 76.64  | 111.85 |
| 20000 | 0.90 | 0.2500 | 0.7500 | 1250 | 6750 | 11250 | 30.04  | 0.2458 | 0.2542 | 0.7458 | 0.7542 | 1208 | 7414 | 11378 | 1293 | 7584 | 11123 | 62.44  | 94.61  |
| 20000 | 0.91 | 0.2500 | 0.7500 | 1250 | 6825 | 11250 | 24.16  | 0.2458 | 0.2542 | 0.7458 | 0.7542 | 1208 | 7414 | 11378 | 1293 | 7584 | 11123 | 49.75  | 78.85  |
| 20000 | 0.92 | 0.2500 | 0.7500 | 1250 | 6900 | 11250 | 18.96  | 0.2458 | 0.2542 | 0.7458 | 0.7542 | 1208 | 7414 | 11378 | 1293 | 7584 | 11123 | 38.59  | 64.58  |
| 20000 | 0.93 | 0.2500 | 0.7500 | 1250 | 6975 | 11250 | 14.42  | 0.2458 | 0.2542 | 0.7458 | 0.7542 | 1208 | 7414 | 11378 | 1293 | 7584 | 11123 | 28.94  | 51.79  |
| 20000 | 0.94 | 0.2500 | 0.7500 | 1250 | 7050 | 11250 | 10.52  | 0.2458 | 0.2542 | 0.7458 | 0.7542 | 1208 | 7414 | 11378 | 1293 | 7584 | 11123 | 20.81  | 40.49  |
| 20000 | 0.95 | 0.2500 | 0.7500 | 1250 | 7125 | 11250 | 7.26   | 0.2458 | 0.2542 | 0.7458 | 0.7542 | 1208 | 7414 | 11378 | 1293 | 7584 | 11123 | 14.19  | 30.66  |
| 20000 | 0.96 | 0.2500 | 0.7500 | 1250 | 7200 | 11250 | 4.62   | 0.2458 | 0.2542 | 0.7458 | 0.7542 | 1208 | 7414 | 11378 | 1293 | 7584 | 11123 | 9.10   | 22.32  |
| 20000 | 0.97 | 0.2500 | 0.7500 | 1250 | 7275 | 11250 | 2.58   | 0.2458 | 0.2542 | 0.7458 | 0.7542 | 1208 | 7414 | 11378 | 1293 | 7584 | 11123 | 5.52   | 15.47  |
| 20000 | 0.98 | 0.2500 | 0.7500 | 1250 | 7350 | 11250 | 1.14   | 0.2458 | 0.2542 | 0.7458 | 0.7542 | 1208 | 7414 | 11378 | 1293 | 7584 | 11123 | 3.46   | 10.09  |
| 20000 | 0.99 | 0.2500 | 0.7500 | 1250 | 7425 | 11250 | 0.28   | 0.2458 | 0.2542 | 0.7458 | 0.7542 | 1208 | 7414 | 11378 | 1293 | 7584 | 11123 | 2.91   | 6.21   |
| 20000 | 1.00 | 0.2500 | 0.7500 | 1250 | 7500 | 11250 | 0.00   | 0.2458 | 0.2542 | 0.7458 | 0.7542 | 1208 | 7414 | 11378 | 1293 | 7584 | 11123 | 3.89   | 3.80   |
| 20000 | 1.01 | 0.2500 | 0.7500 | 1250 | 7575 | 11250 | 0.28   | 0.2458 | 0.2542 | 0.7458 | 0.7542 | 1208 | 7414 | 11378 | 1293 | 7584 | 11123 | 6.38   | 2.88   |
| 20000 | 1.02 | 0.2500 | 0.7500 | 1250 | 7650 | 11250 | 1.11   | 0.2458 | 0.2542 | 0.7458 | 0.7542 | 1208 | 7414 | 11378 | 1293 | 7584 | 11123 | 10.38  | 3.44   |
| 20000 | 1.03 | 0.2500 | 0.7500 | 1250 | 7725 | 11250 | 2.48   | 0.2458 | 0.2542 | 0.7458 | 0.7542 | 1208 | 7414 | 11378 | 1293 | 7584 | 11123 | 15.91  | 5.48   |
| 20000 | 1.04 | 0.2500 | 0.7500 | 1250 | 7800 | 11250 | 4.39   | 0.2458 | 0.2542 | 0.7458 | 0.7542 | 1208 | 7414 | 11378 | 1293 | 7584 | 11123 | 22.95  | 9.01   |
| 20000 | 1.05 | 0.2500 | 0.7500 | 1250 | 7875 | 11250 | 6.82   | 0.2458 | 0.2542 | 0.7458 | 0.7542 | 1208 | 7414 | 11378 | 1293 | 7584 | 11123 | 31.51  | 14.02  |
| 20000 | 1.06 | 0.2500 | 0.7500 | 1250 | 7950 | 11250 | 9.76   | 0.2458 | 0.2542 | 0.7458 | 0.7542 | 1208 | 7414 | 11378 | 1293 | 7584 | 11123 | 41.59  | 20.51  |
| 20000 | 1.07 | 0.2500 | 0.7500 | 1250 | 8025 | 11250 | 13.21  | 0.2458 | 0.2542 | 0.7458 | 0.7542 | 1208 | 7414 | 11378 | 1293 | 7584 | 11123 | 53.18  | 28.49  |
| 20000 | 1.08 | 0.2500 | 0.7500 | 1250 | 8100 | 11250 | 17.15  | 0.2458 | 0.2542 | 0.7458 | 0.7542 | 1208 | 7414 | 11378 | 1293 | 7584 | 11123 | 66.29  | 37.95  |
| 20000 | 1.09 | 0.2500 | 0.7500 | 1250 | 8175 | 11250 | 21.59  | 0.2458 | 0.2542 | 0.7458 | 0.7542 | 1208 | 7414 | 11378 | 1293 | 7584 | 11123 | 80.92  | 48.90  |
| 20000 | 1.10 | 0.2500 | 0.7500 | 1250 | 8250 | 11250 | 26.50  | 0.2458 | 0.2542 | 0.7458 | 0.7542 | 1208 | 7414 | 11378 | 1293 | 7584 | 11123 | 97.07  | 61.32  |
| 20000 | 1.11 | 0.2500 | 0.7500 | 1250 | 8325 | 11250 | 31.88  | 0.2458 | 0.2542 | 0.7458 | 0.7542 | 1208 | 7414 | 11378 | 1293 | 7584 | 11123 | 114.73 | 75.23  |
| 20000 | 1.12 | 0.2500 | 0.7500 | 1250 | 8400 | 11250 | 37.73  | 0.2458 | 0.2542 | 0.7458 | 0.7542 | 1208 | 7414 | 11378 | 1293 | 7584 | 11123 | 133.91 | 90.63  |
| 20000 | 1.13 | 0.2500 | 0.7500 | 1250 | 8475 | 11250 | 44.03  | 0.2458 | 0.2542 | 0.7458 | 0.7542 | 1208 | 7414 | 11378 | 1293 | 7584 | 11123 | 154.61 | 107.51 |
| 20000 | 1.14 | 0.2500 | 0.7500 | 1250 | 8550 | 11250 | 50.78  | 0.2458 | 0.2542 | 0.7458 | 0.7542 | 1208 | 7414 | 11378 | 1293 | 7584 | 11123 | 176.83 | 125.87 |
| 20000 | 1.15 | 0.2500 | 0.7500 | 1250 | 8625 | 11250 | 57.98  | 0.2458 | 0.2542 | 0.7458 | 0.7542 | 1208 | 7414 | 11378 | 1293 | 7584 | 11123 | 200.56 | 145.71 |
| 20000 | 1.16 | 0.2500 | 0.7500 | 1250 | 8700 | 11250 | 65.61  | 0.2458 | 0.2542 | 0.7458 | 0.7542 | 1208 | 7414 | 11378 | 1293 | 7584 | 11123 | 225.81 | 167.04 |
| 20000 | 1.17 | 0.2500 | 0.7500 | 1250 | 8775 | 11250 | 73.67  | 0.2458 | 0.2542 | 0.7458 | 0.7542 | 1208 | 7414 | 11378 | 1293 | 7584 | 11123 | 252.58 | 189.85 |
| 20000 | 1.18 | 0.2500 | 0.7500 | 1250 | 8850 | 11250 | 82.16  | 0.2458 | 0.2542 | 0.7458 | 0.7542 | 1208 | 7414 | 11378 | 1293 | 7584 | 11123 | 280.86 | 214.15 |
| 20000 | 1.19 | 0.2500 | 0.7500 | 1250 | 8925 | 11250 | 91.05  | 0.2458 | 0.2542 | 0.7458 | 0.7542 | 1208 | 7414 | 11378 | 1293 | 7584 | 11123 | 310.66 | 239.92 |
| 20000 | 1.20 | 0.2500 | 0.7500 | 1250 | 9000 | 11250 | 100.36 | 0.2458 | 0.2542 | 0.7458 | 0.7542 | 1208 | 7414 | 11378 | 1293 | 7584 | 11123 | 341.98 | 267.18 |
| 20000 | 0.80 | 0.3000 | 0.7000 | 1800 | 6720 | 9800  | 160.22 | 0.2955 | 0.3045 | 0.6955 | 0.7045 | 1747 | 8327 | 9926  | 1854 | 8471 | 9675  | 313.49 | 365.17 |
| 20000 | 0.81 | 0.3000 | 0.7000 | 1800 | 6804 | 9800  | 143.60 | 0.2955 | 0.3045 | 0.6955 | 0.7045 | 1747 | 8327 | 9926  | 1854 | 8471 | 9675  | 281.91 | 331.28 |

|       |      |        |        |      |      |      |        |        |        |        |        |      |      |      |      |      |      |        |        |
|-------|------|--------|--------|------|------|------|--------|--------|--------|--------|--------|------|------|------|------|------|------|--------|--------|
| 20000 | 0.82 | 0.3000 | 0.7000 | 1800 | 6888 | 9800 | 128.00 | 0.2955 | 0.3045 | 0.6955 | 0.7045 | 1747 | 8327 | 9926 | 1854 | 8471 | 9675 | 252.02 | 299.05 |
| 20000 | 0.83 | 0.3000 | 0.7000 | 1800 | 6972 | 9800 | 113.40 | 0.2955 | 0.3045 | 0.6955 | 0.7045 | 1747 | 8327 | 9926 | 1854 | 8471 | 9675 | 223.83 | 268.49 |
| 20000 | 0.84 | 0.3000 | 0.7000 | 1800 | 7056 | 9800 | 99.78  | 0.2955 | 0.3045 | 0.6955 | 0.7045 | 1747 | 8327 | 9926 | 1854 | 8471 | 9675 | 197.34 | 239.59 |
| 20000 | 0.85 | 0.3000 | 0.7000 | 1800 | 7140 | 9800 | 87.11  | 0.2955 | 0.3045 | 0.6955 | 0.7045 | 1747 | 8327 | 9926 | 1854 | 8471 | 9675 | 172.54 | 212.36 |
| 20000 | 0.86 | 0.3000 | 0.7000 | 1800 | 7224 | 9800 | 75.39  | 0.2955 | 0.3045 | 0.6955 | 0.7045 | 1747 | 8327 | 9926 | 1854 | 8471 | 9675 | 149.43 | 186.80 |
| 20000 | 0.87 | 0.3000 | 0.7000 | 1800 | 7308 | 9800 | 64.58  | 0.2955 | 0.3045 | 0.6955 | 0.7045 | 1747 | 8327 | 9926 | 1854 | 8471 | 9675 | 128.02 | 162.90 |
| 20000 | 0.88 | 0.3000 | 0.7000 | 1800 | 7392 | 9800 | 54.67  | 0.2955 | 0.3045 | 0.6955 | 0.7045 | 1747 | 8327 | 9926 | 1854 | 8471 | 9675 | 108.30 | 140.66 |
| 20000 | 0.89 | 0.3000 | 0.7000 | 1800 | 7476 | 9800 | 45.64  | 0.2955 | 0.3045 | 0.6955 | 0.7045 | 1747 | 8327 | 9926 | 1854 | 8471 | 9675 | 90.28  | 120.10 |
| 20000 | 0.90 | 0.3000 | 0.7000 | 1800 | 7560 | 9800 | 37.48  | 0.2955 | 0.3045 | 0.6955 | 0.7045 | 1747 | 8327 | 9926 | 1854 | 8471 | 9675 | 73.95  | 101.20 |
| 20000 | 0.91 | 0.3000 | 0.7000 | 1800 | 7644 | 9800 | 30.17  | 0.2955 | 0.3045 | 0.6955 | 0.7045 | 1747 | 8327 | 9926 | 1854 | 8471 | 9675 | 59.32  | 83.96  |
| 20000 | 0.92 | 0.3000 | 0.7000 | 1800 | 7728 | 9800 | 23.69  | 0.2955 | 0.3045 | 0.6955 | 0.7045 | 1747 | 8327 | 9926 | 1854 | 8471 | 9675 | 46.38  | 68.39  |
| 20000 | 0.93 | 0.3000 | 0.7000 | 1800 | 7812 | 9800 | 18.03  | 0.2955 | 0.3045 | 0.6955 | 0.7045 | 1747 | 8327 | 9926 | 1854 | 8471 | 9675 | 35.13  | 54.49  |
| 20000 | 0.94 | 0.3000 | 0.7000 | 1800 | 7896 | 9800 | 13.16  | 0.2955 | 0.3045 | 0.6955 | 0.7045 | 1747 | 8327 | 9926 | 1854 | 8471 | 9675 | 25.58  | 42.25  |
| 20000 | 0.95 | 0.3000 | 0.7000 | 1800 | 7980 | 9800 | 9.09   | 0.2955 | 0.3045 | 0.6955 | 0.7045 | 1747 | 8327 | 9926 | 1854 | 8471 | 9675 | 17.73  | 31.68  |
| 20000 | 0.96 | 0.3000 | 0.7000 | 1800 | 8064 | 9800 | 5.78   | 0.2955 | 0.3045 | 0.6955 | 0.7045 | 1747 | 8327 | 9926 | 1854 | 8471 | 9675 | 11.57  | 22.77  |
| 20000 | 0.97 | 0.3000 | 0.7000 | 1800 | 8148 | 9800 | 3.23   | 0.2955 | 0.3045 | 0.6955 | 0.7045 | 1747 | 8327 | 9926 | 1854 | 8471 | 9675 | 7.10   | 15.53  |
| 20000 | 0.98 | 0.3000 | 0.7000 | 1800 | 8232 | 9800 | 1.43   | 0.2955 | 0.3045 | 0.6955 | 0.7045 | 1747 | 8327 | 9926 | 1854 | 8471 | 9675 | 4.33   | 9.96   |
| 20000 | 0.99 | 0.3000 | 0.7000 | 1800 | 8316 | 9800 | 0.35   | 0.2955 | 0.3045 | 0.6955 | 0.7045 | 1747 | 8327 | 9926 | 1854 | 8471 | 9675 | 3.26   | 6.05   |
| 20000 | 1.00 | 0.3000 | 0.7000 | 1800 | 8400 | 9800 | 0.00   | 0.2955 | 0.3045 | 0.6955 | 0.7045 | 1747 | 8327 | 9926 | 1854 | 8471 | 9675 | 3.88   | 3.81   |
| 20000 | 1.01 | 0.3000 | 0.7000 | 1800 | 8484 | 9800 | 0.35   | 0.2955 | 0.3045 | 0.6955 | 0.7045 | 1747 | 8327 | 9926 | 1854 | 8471 | 9675 | 6.19   | 3.23   |
| 20000 | 1.02 | 0.3000 | 0.7000 | 1800 | 8568 | 9800 | 1.40   | 0.2955 | 0.3045 | 0.6955 | 0.7045 | 1747 | 8327 | 9926 | 1854 | 8471 | 9675 | 10.20  | 4.32   |
| 20000 | 1.03 | 0.3000 | 0.7000 | 1800 | 8652 | 9800 | 3.12   | 0.2955 | 0.3045 | 0.6955 | 0.7045 | 1747 | 8327 | 9926 | 1854 | 8471 | 9675 | 15.90  | 7.08   |
| 20000 | 1.04 | 0.3000 | 0.7000 | 1800 | 8736 | 9800 | 5.52   | 0.2955 | 0.3045 | 0.6955 | 0.7045 | 1747 | 8327 | 9926 | 1854 | 8471 | 9675 | 23.30  | 11.50  |
| 20000 | 1.05 | 0.3000 | 0.7000 | 1800 | 8820 | 9800 | 8.57   | 0.2955 | 0.3045 | 0.6955 | 0.7045 | 1747 | 8327 | 9926 | 1854 | 8471 | 9675 | 32.39  | 17.59  |
| 20000 | 1.06 | 0.3000 | 0.7000 | 1800 | 8904 | 9800 | 12.28  | 0.2955 | 0.3045 | 0.6955 | 0.7045 | 1747 | 8327 | 9926 | 1854 | 8471 | 9675 | 43.17  | 25.34  |
| 20000 | 1.07 | 0.3000 | 0.7000 | 1800 | 8988 | 9800 | 16.62  | 0.2955 | 0.3045 | 0.6955 | 0.7045 | 1747 | 8327 | 9926 | 1854 | 8471 | 9675 | 55.66  | 34.76  |
| 20000 | 1.08 | 0.3000 | 0.7000 | 1800 | 9072 | 9800 | 21.59  | 0.2955 | 0.3045 | 0.6955 | 0.7045 | 1747 | 8327 | 9926 | 1854 | 8471 | 9675 | 69.83  | 45.85  |
| 20000 | 1.09 | 0.3000 | 0.7000 | 1800 | 9156 | 9800 | 27.17  | 0.2955 | 0.3045 | 0.6955 | 0.7045 | 1747 | 8327 | 9926 | 1854 | 8471 | 9675 | 85.70  | 58.60  |
| 20000 | 1.10 | 0.3000 | 0.7000 | 1800 | 9240 | 9800 | 33.37  | 0.2955 | 0.3045 | 0.6955 | 0.7045 | 1747 | 8327 | 9926 | 1854 | 8471 | 9675 | 103.27 | 73.01  |
| 20000 | 1.11 | 0.3000 | 0.7000 | 1800 | 9324 | 9800 | 40.16  | 0.2955 | 0.3045 | 0.6955 | 0.7045 | 1747 | 8327 | 9926 | 1854 | 8471 | 9675 | 122.53 | 89.10  |
| 20000 | 1.12 | 0.3000 | 0.7000 | 1800 | 9408 | 9800 | 47.54  | 0.2955 | 0.3045 | 0.6955 | 0.7045 | 1747 | 8327 | 9926 | 1854 | 8471 | 9675 | 143.48 | 106.85 |
| 20000 | 1.13 | 0.3000 | 0.7000 | 1800 | 9492 | 9800 | 55.50  | 0.2955 | 0.3045 | 0.6955 | 0.7045 | 1747 | 8327 | 9926 | 1854 | 8471 | 9675 | 166.13 | 126.26 |
| 20000 | 1.14 | 0.3000 | 0.7000 | 1800 | 9576 | 9800 | 64.04  | 0.2955 | 0.3045 | 0.6955 | 0.7045 | 1747 | 8327 | 9926 | 1854 | 8471 | 9675 | 190.47 | 147.34 |
| 20000 | 1.15 | 0.3000 | 0.7000 | 1800 | 9660 | 9800 | 73.13  | 0.2955 | 0.3045 | 0.6955 | 0.7045 | 1747 | 8327 | 9926 | 1854 | 8471 | 9675 | 216.51 | 170.09 |
| 20000 | 1.16 | 0.3000 | 0.7000 | 1800 | 9744 | 9800 | 82.78  | 0.2955 | 0.3045 | 0.6955 | 0.7045 | 1747 | 8327 | 9926 | 1854 | 8471 | 9675 | 244.25 | 194.50 |

|       |      |        |        |      |       |      |        |        |        |        |        |      |      |      |      |      |      |        |        |
|-------|------|--------|--------|------|-------|------|--------|--------|--------|--------|--------|------|------|------|------|------|------|--------|--------|
| 20000 | 1.17 | 0.3000 | 0.7000 | 1800 | 9828  | 9800 | 92.98  | 0.2955 | 0.3045 | 0.6955 | 0.7045 | 1747 | 8327 | 9926 | 1854 | 8471 | 9675 | 273.67 | 220.58 |
| 20000 | 1.18 | 0.3000 | 0.7000 | 1800 | 9912  | 9800 | 103.71 | 0.2955 | 0.3045 | 0.6955 | 0.7045 | 1747 | 8327 | 9926 | 1854 | 8471 | 9675 | 304.80 | 248.32 |
| 20000 | 1.19 | 0.3000 | 0.7000 | 1800 | 9996  | 9800 | 114.97 | 0.2955 | 0.3045 | 0.6955 | 0.7045 | 1747 | 8327 | 9926 | 1854 | 8471 | 9675 | 337.61 | 277.73 |
| 20000 | 1.20 | 0.3000 | 0.7000 | 1800 | 10080 | 9800 | 126.76 | 0.2955 | 0.3045 | 0.6955 | 0.7045 | 1747 | 8327 | 9926 | 1854 | 8471 | 9675 | 372.13 | 308.81 |
| 20000 | 0.80 | 0.3500 | 0.6500 | 2450 | 7280  | 8450 | 186.28 | 0.3453 | 0.3547 | 0.6453 | 0.6547 | 2385 | 9043 | 8572 | 2516 | 9155 | 8329 | 347.23 | 387.58 |
| 20000 | 0.81 | 0.3500 | 0.6500 | 2450 | 7371  | 8450 | 167.05 | 0.3453 | 0.3547 | 0.6453 | 0.6547 | 2385 | 9043 | 8572 | 2516 | 9155 | 8329 | 312.66 | 351.20 |
| 20000 | 0.82 | 0.3500 | 0.6500 | 2450 | 7462  | 8450 | 148.99 | 0.3453 | 0.3547 | 0.6453 | 0.6547 | 2385 | 9043 | 8572 | 2516 | 9155 | 8329 | 279.93 | 316.64 |
| 20000 | 0.83 | 0.3500 | 0.6500 | 2450 | 7553  | 8450 | 132.07 | 0.3453 | 0.3547 | 0.6453 | 0.6547 | 2385 | 9043 | 8572 | 2516 | 9155 | 8329 | 249.02 | 283.88 |
| 20000 | 0.84 | 0.3500 | 0.6500 | 2450 | 7644  | 8450 | 116.27 | 0.3453 | 0.3547 | 0.6453 | 0.6547 | 2385 | 9043 | 8572 | 2516 | 9155 | 8329 | 219.95 | 252.94 |
| 20000 | 0.85 | 0.3500 | 0.6500 | 2450 | 7735  | 8450 | 101.57 | 0.3453 | 0.3547 | 0.6453 | 0.6547 | 2385 | 9043 | 8572 | 2516 | 9155 | 8329 | 192.71 | 223.80 |
| 20000 | 0.86 | 0.3500 | 0.6500 | 2450 | 7826  | 8450 | 87.94  | 0.3453 | 0.3547 | 0.6453 | 0.6547 | 2385 | 9043 | 8572 | 2516 | 9155 | 8329 | 167.30 | 196.47 |
| 20000 | 0.87 | 0.3500 | 0.6500 | 2450 | 7917  | 8450 | 75.37  | 0.3453 | 0.3547 | 0.6453 | 0.6547 | 2385 | 9043 | 8572 | 2516 | 9155 | 8329 | 143.72 | 170.95 |
| 20000 | 0.88 | 0.3500 | 0.6500 | 2450 | 8008  | 8450 | 63.84  | 0.3453 | 0.3547 | 0.6453 | 0.6547 | 2385 | 9043 | 8572 | 2516 | 9155 | 8329 | 121.97 | 147.24 |
| 20000 | 0.89 | 0.3500 | 0.6500 | 2450 | 8099  | 8450 | 53.33  | 0.3453 | 0.3547 | 0.6453 | 0.6547 | 2385 | 9043 | 8572 | 2516 | 9155 | 8329 | 102.06 | 125.34 |
| 20000 | 0.90 | 0.3500 | 0.6500 | 2450 | 8190  | 8450 | 43.81  | 0.3453 | 0.3547 | 0.6453 | 0.6547 | 2385 | 9043 | 8572 | 2516 | 9155 | 8329 | 83.97  | 105.25 |
| 20000 | 0.91 | 0.3500 | 0.6500 | 2450 | 8281  | 8450 | 35.28  | 0.3453 | 0.3547 | 0.6453 | 0.6547 | 2385 | 9043 | 8572 | 2516 | 9155 | 8329 | 67.72  | 86.96  |
| 20000 | 0.92 | 0.3500 | 0.6500 | 2450 | 8372  | 8450 | 27.72  | 0.3453 | 0.3547 | 0.6453 | 0.6547 | 2385 | 9043 | 8572 | 2516 | 9155 | 8329 | 53.30  | 70.49  |
| 20000 | 0.93 | 0.3500 | 0.6500 | 2450 | 8463  | 8450 | 21.10  | 0.3453 | 0.3547 | 0.6453 | 0.6547 | 2385 | 9043 | 8572 | 2516 | 9155 | 8329 | 40.71  | 55.82  |
| 20000 | 0.94 | 0.3500 | 0.6500 | 2450 | 8554  | 8450 | 15.41  | 0.3453 | 0.3547 | 0.6453 | 0.6547 | 2385 | 9043 | 8572 | 2516 | 9155 | 8329 | 29.95  | 42.97  |
| 20000 | 0.95 | 0.3500 | 0.6500 | 2450 | 8645  | 8450 | 10.64  | 0.3453 | 0.3547 | 0.6453 | 0.6547 | 2385 | 9043 | 8572 | 2516 | 9155 | 8329 | 21.03  | 31.92  |
| 20000 | 0.96 | 0.3500 | 0.6500 | 2450 | 8736  | 8450 | 6.77   | 0.3453 | 0.3547 | 0.6453 | 0.6547 | 2385 | 9043 | 8572 | 2516 | 9155 | 8329 | 13.93  | 22.68  |
| 20000 | 0.97 | 0.3500 | 0.6500 | 2450 | 8827  | 8450 | 3.79   | 0.3453 | 0.3547 | 0.6453 | 0.6547 | 2385 | 9043 | 8572 | 2516 | 9155 | 8329 | 8.67   | 15.25  |
| 20000 | 0.98 | 0.3500 | 0.6500 | 2450 | 8918  | 8450 | 1.67   | 0.3453 | 0.3547 | 0.6453 | 0.6547 | 2385 | 9043 | 8572 | 2516 | 9155 | 8329 | 5.24   | 9.63   |
| 20000 | 0.99 | 0.3500 | 0.6500 | 2450 | 9009  | 8450 | 0.42   | 0.3453 | 0.3547 | 0.6453 | 0.6547 | 2385 | 9043 | 8572 | 2516 | 9155 | 8329 | 3.64   | 5.82   |
| 20000 | 1.00 | 0.3500 | 0.6500 | 2450 | 9100  | 8450 | 0.00   | 0.3453 | 0.3547 | 0.6453 | 0.6547 | 2385 | 9043 | 8572 | 2516 | 9155 | 8329 | 3.87   | 3.82   |
| 20000 | 1.01 | 0.3500 | 0.6500 | 2450 | 9191  | 8450 | 0.41   | 0.3453 | 0.3547 | 0.6453 | 0.6547 | 2385 | 9043 | 8572 | 2516 | 9155 | 8329 | 5.93   | 3.63   |
| 20000 | 1.02 | 0.3500 | 0.6500 | 2450 | 9282  | 8450 | 1.64   | 0.3453 | 0.3547 | 0.6453 | 0.6547 | 2385 | 9043 | 8572 | 2516 | 9155 | 8329 | 9.82   | 5.24   |
| 20000 | 1.03 | 0.3500 | 0.6500 | 2450 | 9373  | 8450 | 3.67   | 0.3453 | 0.3547 | 0.6453 | 0.6547 | 2385 | 9043 | 8572 | 2516 | 9155 | 8329 | 15.55  | 8.67   |
| 20000 | 1.04 | 0.3500 | 0.6500 | 2450 | 9464  | 8450 | 6.48   | 0.3453 | 0.3547 | 0.6453 | 0.6547 | 2385 | 9043 | 8572 | 2516 | 9155 | 8329 | 23.10  | 13.90  |
| 20000 | 1.05 | 0.3500 | 0.6500 | 2450 | 9555  | 8450 | 10.08  | 0.3453 | 0.3547 | 0.6453 | 0.6547 | 2385 | 9043 | 8572 | 2516 | 9155 | 8329 | 32.49  | 20.94  |
| 20000 | 1.06 | 0.3500 | 0.6500 | 2450 | 9646  | 8450 | 14.44  | 0.3453 | 0.3547 | 0.6453 | 0.6547 | 2385 | 9043 | 8572 | 2516 | 9155 | 8329 | 43.71  | 29.79  |
| 20000 | 1.07 | 0.3500 | 0.6500 | 2450 | 9737  | 8450 | 19.55  | 0.3453 | 0.3547 | 0.6453 | 0.6547 | 2385 | 9043 | 8572 | 2516 | 9155 | 8329 | 56.76  | 40.46  |
| 20000 | 1.08 | 0.3500 | 0.6500 | 2450 | 9828  | 8450 | 25.40  | 0.3453 | 0.3547 | 0.6453 | 0.6547 | 2385 | 9043 | 8572 | 2516 | 9155 | 8329 | 71.64  | 52.93  |
| 20000 | 1.09 | 0.3500 | 0.6500 | 2450 | 9919  | 8450 | 31.98  | 0.3453 | 0.3547 | 0.6453 | 0.6547 | 2385 | 9043 | 8572 | 2516 | 9155 | 8329 | 88.36  | 67.20  |
| 20000 | 1.10 | 0.3500 | 0.6500 | 2450 | 10010 | 8450 | 39.28  | 0.3453 | 0.3547 | 0.6453 | 0.6547 | 2385 | 9043 | 8572 | 2516 | 9155 | 8329 | 106.90 | 83.29  |

|       |      |        |        |      |       |      |        |        |        |        |        |      |      |      |      |      |      |        |        |
|-------|------|--------|--------|------|-------|------|--------|--------|--------|--------|--------|------|------|------|------|------|------|--------|--------|
| 20000 | 1.11 | 0.3500 | 0.6500 | 2450 | 10101 | 8450 | 47.29  | 0.3453 | 0.3547 | 0.6453 | 0.6547 | 2385 | 9043 | 8572 | 2516 | 9155 | 8329 | 127.28 | 101.19 |
| 20000 | 1.12 | 0.3500 | 0.6500 | 2450 | 10192 | 8450 | 55.99  | 0.3453 | 0.3547 | 0.6453 | 0.6547 | 2385 | 9043 | 8572 | 2516 | 9155 | 8329 | 149.49 | 120.90 |
| 20000 | 1.13 | 0.3500 | 0.6500 | 2450 | 10283 | 8450 | 65.39  | 0.3453 | 0.3547 | 0.6453 | 0.6547 | 2385 | 9043 | 8572 | 2516 | 9155 | 8329 | 173.53 | 142.41 |
| 20000 | 1.14 | 0.3500 | 0.6500 | 2450 | 10374 | 8450 | 75.46  | 0.3453 | 0.3547 | 0.6453 | 0.6547 | 2385 | 9043 | 8572 | 2516 | 9155 | 8329 | 199.40 | 165.74 |
| 20000 | 1.15 | 0.3500 | 0.6500 | 2450 | 10465 | 8450 | 86.19  | 0.3453 | 0.3547 | 0.6453 | 0.6547 | 2385 | 9043 | 8572 | 2516 | 9155 | 8329 | 227.10 | 190.87 |
| 20000 | 1.16 | 0.3500 | 0.6500 | 2450 | 10556 | 8450 | 97.59  | 0.3453 | 0.3547 | 0.6453 | 0.6547 | 2385 | 9043 | 8572 | 2516 | 9155 | 8329 | 256.64 | 217.81 |
| 20000 | 1.17 | 0.3500 | 0.6500 | 2450 | 10647 | 8450 | 109.63 | 0.3453 | 0.3547 | 0.6453 | 0.6547 | 2385 | 9043 | 8572 | 2516 | 9155 | 8329 | 288.00 | 246.56 |
| 20000 | 1.18 | 0.3500 | 0.6500 | 2450 | 10738 | 8450 | 122.31 | 0.3453 | 0.3547 | 0.6453 | 0.6547 | 2385 | 9043 | 8572 | 2516 | 9155 | 8329 | 321.20 | 277.12 |
| 20000 | 1.19 | 0.3500 | 0.6500 | 2450 | 10829 | 8450 | 135.62 | 0.3453 | 0.3547 | 0.6453 | 0.6547 | 2385 | 9043 | 8572 | 2516 | 9155 | 8329 | 356.23 | 309.49 |
| 20000 | 1.20 | 0.3500 | 0.6500 | 2450 | 10920 | 8450 | 149.55 | 0.3453 | 0.3547 | 0.6453 | 0.6547 | 2385 | 9043 | 8572 | 2516 | 9155 | 8329 | 393.09 | 343.67 |
| 20000 | 0.80 | 0.4000 | 0.6000 | 3200 | 7680  | 7200 | 205.91 | 0.3952 | 0.4048 | 0.5952 | 0.6048 | 3124 | 9561 | 7316 | 3277 | 9637 | 7085 | 373.64 | 401.27 |
| 20000 | 0.81 | 0.4000 | 0.6000 | 3200 | 7776  | 7200 | 184.75 | 0.3952 | 0.4048 | 0.5952 | 0.6048 | 3124 | 9561 | 7316 | 3277 | 9637 | 7085 | 336.84 | 363.23 |
| 20000 | 0.82 | 0.4000 | 0.6000 | 3200 | 7872  | 7200 | 164.84 | 0.3952 | 0.4048 | 0.5952 | 0.6048 | 3124 | 9561 | 7316 | 3277 | 9637 | 7085 | 301.96 | 327.10 |
| 20000 | 0.83 | 0.4000 | 0.6000 | 3200 | 7968  | 7200 | 146.18 | 0.3952 | 0.4048 | 0.5952 | 0.6048 | 3124 | 9561 | 7316 | 3277 | 9637 | 7085 | 269.01 | 292.88 |
| 20000 | 0.84 | 0.4000 | 0.6000 | 3200 | 8064  | 7200 | 128.75 | 0.3952 | 0.4048 | 0.5952 | 0.6048 | 3124 | 9561 | 7316 | 3277 | 9637 | 7085 | 237.99 | 260.58 |
| 20000 | 0.85 | 0.4000 | 0.6000 | 3200 | 8160  | 7200 | 112.51 | 0.3952 | 0.4048 | 0.5952 | 0.6048 | 3124 | 9561 | 7316 | 3277 | 9637 | 7085 | 208.90 | 230.19 |
| 20000 | 0.86 | 0.4000 | 0.6000 | 3200 | 8256  | 7200 | 97.45  | 0.3952 | 0.4048 | 0.5952 | 0.6048 | 3124 | 9561 | 7316 | 3277 | 9637 | 7085 | 181.73 | 201.71 |
| 20000 | 0.87 | 0.4000 | 0.6000 | 3200 | 8352  | 7200 | 83.55  | 0.3952 | 0.4048 | 0.5952 | 0.6048 | 3124 | 9561 | 7316 | 3277 | 9637 | 7085 | 156.50 | 175.14 |
| 20000 | 0.88 | 0.4000 | 0.6000 | 3200 | 8448  | 7200 | 70.79  | 0.3952 | 0.4048 | 0.5952 | 0.6048 | 3124 | 9561 | 7316 | 3277 | 9637 | 7085 | 133.19 | 150.49 |
| 20000 | 0.89 | 0.4000 | 0.6000 | 3200 | 8544  | 7200 | 59.16  | 0.3952 | 0.4048 | 0.5952 | 0.6048 | 3124 | 9561 | 7316 | 3277 | 9637 | 7085 | 111.81 | 127.75 |
| 20000 | 0.90 | 0.4000 | 0.6000 | 3200 | 8640  | 7200 | 48.62  | 0.3952 | 0.4048 | 0.5952 | 0.6048 | 3124 | 9561 | 7316 | 3277 | 9637 | 7085 | 92.35  | 106.92 |
| 20000 | 0.91 | 0.4000 | 0.6000 | 3200 | 8736  | 7200 | 39.16  | 0.3952 | 0.4048 | 0.5952 | 0.6048 | 3124 | 9561 | 7316 | 3277 | 9637 | 7085 | 74.83  | 88.01  |
| 20000 | 0.92 | 0.4000 | 0.6000 | 3200 | 8832  | 7200 | 30.78  | 0.3952 | 0.4048 | 0.5952 | 0.6048 | 3124 | 9561 | 7316 | 3277 | 9637 | 7085 | 59.23  | 71.00  |
| 20000 | 0.93 | 0.4000 | 0.6000 | 3200 | 8928  | 7200 | 23.43  | 0.3952 | 0.4048 | 0.5952 | 0.6048 | 3124 | 9561 | 7316 | 3277 | 9637 | 7085 | 45.56  | 55.91  |
| 20000 | 0.94 | 0.4000 | 0.6000 | 3200 | 9024  | 7200 | 17.12  | 0.3952 | 0.4048 | 0.5952 | 0.6048 | 3124 | 9561 | 7316 | 3277 | 9637 | 7085 | 33.82  | 42.73  |
| 20000 | 0.95 | 0.4000 | 0.6000 | 3200 | 9120  | 7200 | 11.83  | 0.3952 | 0.4048 | 0.5952 | 0.6048 | 3124 | 9561 | 7316 | 3277 | 9637 | 7085 | 24.01  | 31.47  |
| 20000 | 0.96 | 0.4000 | 0.6000 | 3200 | 9216  | 7200 | 7.53   | 0.3952 | 0.4048 | 0.5952 | 0.6048 | 3124 | 9561 | 7316 | 3277 | 9637 | 7085 | 16.12  | 22.11  |
| 20000 | 0.97 | 0.4000 | 0.6000 | 3200 | 9312  | 7200 | 4.21   | 0.3952 | 0.4048 | 0.5952 | 0.6048 | 3124 | 9561 | 7316 | 3277 | 9637 | 7085 | 10.16  | 14.67  |
| 20000 | 0.98 | 0.4000 | 0.6000 | 3200 | 9408  | 7200 | 1.86   | 0.3952 | 0.4048 | 0.5952 | 0.6048 | 3124 | 9561 | 7316 | 3277 | 9637 | 7085 | 6.13   | 9.15   |
| 20000 | 0.99 | 0.4000 | 0.6000 | 3200 | 9504  | 7200 | 0.46   | 0.3952 | 0.4048 | 0.5952 | 0.6048 | 3124 | 9561 | 7316 | 3277 | 9637 | 7085 | 4.03   | 5.53   |
| 20000 | 1.00 | 0.4000 | 0.6000 | 3200 | 9600  | 7200 | 0.00   | 0.3952 | 0.4048 | 0.5952 | 0.6048 | 3124 | 9561 | 7316 | 3277 | 9637 | 7085 | 3.86   | 3.83   |
| 20000 | 1.01 | 0.4000 | 0.6000 | 3200 | 9696  | 7200 | 0.46   | 0.3952 | 0.4048 | 0.5952 | 0.6048 | 3124 | 9561 | 7316 | 3277 | 9637 | 7085 | 5.61   | 4.04   |
| 20000 | 1.02 | 0.4000 | 0.6000 | 3200 | 9792  | 7200 | 1.82   | 0.3952 | 0.4048 | 0.5952 | 0.6048 | 3124 | 9561 | 7316 | 3277 | 9637 | 7085 | 9.29   | 6.16   |
| 20000 | 1.03 | 0.4000 | 0.6000 | 3200 | 9888  | 7200 | 4.08   | 0.3952 | 0.4048 | 0.5952 | 0.6048 | 3124 | 9561 | 7316 | 3277 | 9637 | 7085 | 14.90  | 10.19  |
| 20000 | 1.04 | 0.4000 | 0.6000 | 3200 | 9984  | 7200 | 7.22   | 0.3952 | 0.4048 | 0.5952 | 0.6048 | 3124 | 9561 | 7316 | 3277 | 9637 | 7085 | 22.44  | 16.14  |



|       |      |        |        |      |       |      |        |        |        |        |        |      |      |      |      |      |      |        |        |
|-------|------|--------|--------|------|-------|------|--------|--------|--------|--------|--------|------|------|------|------|------|------|--------|--------|
| 20000 | 1.05 | 0.4000 | 0.6000 | 3200 | 10080 | 7200 | 11.23  | 0.3952 | 0.4048 | 0.5952 | 0.6048 | 3124 | 9561 | 7316 | 3277 | 9637 | 7085 | 31.91  | 24.00  |
| 20000 | 1.06 | 0.4000 | 0.6000 | 3200 | 10176 | 7200 | 16.09  | 0.3952 | 0.4048 | 0.5952 | 0.6048 | 3124 | 9561 | 7316 | 3277 | 9637 | 7085 | 43.30  | 33.77  |
| 20000 | 1.07 | 0.4000 | 0.6000 | 3200 | 10272 | 7200 | 21.79  | 0.3952 | 0.4048 | 0.5952 | 0.6048 | 3124 | 9561 | 7316 | 3277 | 9637 | 7085 | 56.62  | 45.46  |
| 20000 | 1.08 | 0.4000 | 0.6000 | 3200 | 10368 | 7200 | 28.32  | 0.3952 | 0.4048 | 0.5952 | 0.6048 | 3124 | 9561 | 7316 | 3277 | 9637 | 7085 | 71.87  | 59.05  |
| 20000 | 1.09 | 0.4000 | 0.6000 | 3200 | 10464 | 7200 | 35.66  | 0.3952 | 0.4048 | 0.5952 | 0.6048 | 3124 | 9561 | 7316 | 3277 | 9637 | 7085 | 89.05  | 74.56  |
| 20000 | 1.10 | 0.4000 | 0.6000 | 3200 | 10560 | 7200 | 43.81  | 0.3952 | 0.4048 | 0.5952 | 0.6048 | 3124 | 9561 | 7316 | 3277 | 9637 | 7085 | 108.15 | 91.99  |
| 20000 | 1.11 | 0.4000 | 0.6000 | 3200 | 10656 | 7200 | 52.75  | 0.3952 | 0.4048 | 0.5952 | 0.6048 | 3124 | 9561 | 7316 | 3277 | 9637 | 7085 | 129.18 | 111.32 |
| 20000 | 1.12 | 0.4000 | 0.6000 | 3200 | 10752 | 7200 | 62.47  | 0.3952 | 0.4048 | 0.5952 | 0.6048 | 3124 | 9561 | 7316 | 3277 | 9637 | 7085 | 152.14 | 132.57 |
| 20000 | 1.13 | 0.4000 | 0.6000 | 3200 | 10848 | 7200 | 72.97  | 0.3952 | 0.4048 | 0.5952 | 0.6048 | 3124 | 9561 | 7316 | 3277 | 9637 | 7085 | 177.03 | 155.73 |
| 20000 | 1.14 | 0.4000 | 0.6000 | 3200 | 10944 | 7200 | 84.22  | 0.3952 | 0.4048 | 0.5952 | 0.6048 | 3124 | 9561 | 7316 | 3277 | 9637 | 7085 | 203.85 | 180.80 |
| 20000 | 1.15 | 0.4000 | 0.6000 | 3200 | 11040 | 7200 | 96.21  | 0.3952 | 0.4048 | 0.5952 | 0.6048 | 3124 | 9561 | 7316 | 3277 | 9637 | 7085 | 232.59 | 207.78 |
| 20000 | 1.16 | 0.4000 | 0.6000 | 3200 | 11136 | 7200 | 108.95 | 0.3952 | 0.4048 | 0.5952 | 0.6048 | 3124 | 9561 | 7316 | 3277 | 9637 | 7085 | 263.27 | 236.68 |
| 20000 | 1.17 | 0.4000 | 0.6000 | 3200 | 11232 | 7200 | 122.41 | 0.3952 | 0.4048 | 0.5952 | 0.6048 | 3124 | 9561 | 7316 | 3277 | 9637 | 7085 | 295.87 | 267.49 |
| 20000 | 1.18 | 0.4000 | 0.6000 | 3200 | 11328 | 7200 | 136.59 | 0.3952 | 0.4048 | 0.5952 | 0.6048 | 3124 | 9561 | 7316 | 3277 | 9637 | 7085 | 330.39 | 300.21 |
| 20000 | 1.19 | 0.4000 | 0.6000 | 3200 | 11424 | 7200 | 151.48 | 0.3952 | 0.4048 | 0.5952 | 0.6048 | 3124 | 9561 | 7316 | 3277 | 9637 | 7085 | 366.85 | 334.85 |
| 20000 | 1.20 | 0.4000 | 0.6000 | 3200 | 11520 | 7200 | 167.06 | 0.3952 | 0.4048 | 0.5952 | 0.6048 | 3124 | 9561 | 7316 | 3277 | 9637 | 7085 | 405.23 | 371.40 |
| 20000 | 0.80 | 0.4500 | 0.5500 | 4050 | 7920  | 6050 | 218.10 | 0.4451 | 0.4549 | 0.5451 | 0.5549 | 3963 | 9880 | 6158 | 4138 | 9919 | 5943 | 392.47 | 406.50 |
| 20000 | 0.81 | 0.4500 | 0.5500 | 4050 | 8019  | 6050 | 195.73 | 0.4451 | 0.4549 | 0.5451 | 0.5549 | 3963 | 9880 | 6158 | 4138 | 9919 | 5943 | 354.19 | 367.59 |
| 20000 | 0.82 | 0.4500 | 0.5500 | 4050 | 8118  | 6050 | 174.69 | 0.4451 | 0.4549 | 0.5451 | 0.5549 | 3963 | 9880 | 6158 | 4138 | 9919 | 5943 | 317.90 | 330.66 |
| 20000 | 0.83 | 0.4500 | 0.5500 | 4050 | 8217  | 6050 | 154.95 | 0.4451 | 0.4549 | 0.5451 | 0.5549 | 3963 | 9880 | 6158 | 4138 | 9919 | 5943 | 283.58 | 295.71 |
| 20000 | 0.84 | 0.4500 | 0.5500 | 4050 | 8316  | 6050 | 136.50 | 0.4451 | 0.4549 | 0.5451 | 0.5549 | 3963 | 9880 | 6158 | 4138 | 9919 | 5943 | 251.26 | 262.73 |
| 20000 | 0.85 | 0.4500 | 0.5500 | 4050 | 8415  | 6050 | 119.31 | 0.4451 | 0.4549 | 0.5451 | 0.5549 | 3963 | 9880 | 6158 | 4138 | 9919 | 5943 | 220.91 | 231.72 |
| 20000 | 0.86 | 0.4500 | 0.5500 | 4050 | 8514  | 6050 | 103.37 | 0.4451 | 0.4549 | 0.5451 | 0.5549 | 3963 | 9880 | 6158 | 4138 | 9919 | 5943 | 192.55 | 202.70 |
| 20000 | 0.87 | 0.4500 | 0.5500 | 4050 | 8613  | 6050 | 88.65  | 0.4451 | 0.4549 | 0.5451 | 0.5549 | 3963 | 9880 | 6158 | 4138 | 9919 | 5943 | 166.18 | 175.65 |
| 20000 | 0.88 | 0.4500 | 0.5500 | 4050 | 8712  | 6050 | 75.13  | 0.4451 | 0.4549 | 0.5451 | 0.5549 | 3963 | 9880 | 6158 | 4138 | 9919 | 5943 | 141.79 | 150.57 |
| 20000 | 0.89 | 0.4500 | 0.5500 | 4050 | 8811  | 6050 | 62.79  | 0.4451 | 0.4549 | 0.5451 | 0.5549 | 3963 | 9880 | 6158 | 4138 | 9919 | 5943 | 119.38 | 127.47 |
| 20000 | 0.90 | 0.4500 | 0.5500 | 4050 | 8910  | 6050 | 51.61  | 0.4451 | 0.4549 | 0.5451 | 0.5549 | 3963 | 9880 | 6158 | 4138 | 9919 | 5943 | 98.96  | 106.35 |
| 20000 | 0.91 | 0.4500 | 0.5500 | 4050 | 9009  | 6050 | 41.59  | 0.4451 | 0.4549 | 0.5451 | 0.5549 | 3963 | 9880 | 6158 | 4138 | 9919 | 5943 | 80.52  | 87.21  |
| 20000 | 0.92 | 0.4500 | 0.5500 | 4050 | 9108  | 6050 | 32.68  | 0.4451 | 0.4549 | 0.5451 | 0.5549 | 3963 | 9880 | 6158 | 4138 | 9919 | 5943 | 64.06  | 70.04  |
| 20000 | 0.93 | 0.4500 | 0.5500 | 4050 | 9207  | 6050 | 24.89  | 0.4451 | 0.4549 | 0.5451 | 0.5549 | 3963 | 9880 | 6158 | 4138 | 9919 | 5943 | 49.59  | 54.85  |
| 20000 | 0.94 | 0.4500 | 0.5500 | 4050 | 9306  | 6050 | 18.19  | 0.4451 | 0.4549 | 0.5451 | 0.5549 | 3963 | 9880 | 6158 | 4138 | 9919 | 5943 | 37.10  | 41.63  |
| 20000 | 0.95 | 0.4500 | 0.5500 | 4050 | 9405  | 6050 | 12.57  | 0.4451 | 0.4549 | 0.5451 | 0.5549 | 3963 | 9880 | 6158 | 4138 | 9919 | 5943 | 26.60  | 30.39  |
| 20000 | 0.96 | 0.4500 | 0.5500 | 4050 | 9504  | 6050 | 8.00   | 0.4451 | 0.4549 | 0.5451 | 0.5549 | 3963 | 9880 | 6158 | 4138 | 9919 | 5943 | 18.08  | 21.13  |
| 20000 | 0.97 | 0.4500 | 0.5500 | 4050 | 9603  | 6050 | 4.48   | 0.4451 | 0.4549 | 0.5451 | 0.5549 | 3963 | 9880 | 6158 | 4138 | 9919 | 5943 | 11.55  | 13.84  |
| 20000 | 0.98 | 0.4500 | 0.5500 | 4050 | 9702  | 6050 | 1.98   | 0.4451 | 0.4549 | 0.5451 | 0.5549 | 3963 | 9880 | 6158 | 4138 | 9919 | 5943 | 7.00   | 8.53   |

|       |      |        |        |      |       |      |        |        |        |        |        |      |      |      |      |      |      |        |        |
|-------|------|--------|--------|------|-------|------|--------|--------|--------|--------|--------|------|------|------|------|------|------|--------|--------|
| 20000 | 0.99 | 0.4500 | 0.5500 | 4050 | 9801  | 6050 | 0.49   | 0.4451 | 0.4549 | 0.5451 | 0.5549 | 3963 | 9880 | 6158 | 4138 | 9919 | 5943 | 4.43   | 5.19   |
| 20000 | 1.00 | 0.4500 | 0.5500 | 4050 | 9900  | 6050 | 0.00   | 0.4451 | 0.4549 | 0.5451 | 0.5549 | 3963 | 9880 | 6158 | 4138 | 9919 | 5943 | 3.85   | 3.83   |
| 20000 | 1.01 | 0.4500 | 0.5500 | 4050 | 9999  | 6050 | 0.49   | 0.4451 | 0.4549 | 0.5451 | 0.5549 | 3963 | 9880 | 6158 | 4138 | 9919 | 5943 | 5.25   | 4.45   |
| 20000 | 1.02 | 0.4500 | 0.5500 | 4050 | 10098 | 6050 | 1.94   | 0.4451 | 0.4549 | 0.5451 | 0.5549 | 3963 | 9880 | 6158 | 4138 | 9919 | 5943 | 8.64   | 7.05   |
| 20000 | 1.03 | 0.4500 | 0.5500 | 4050 | 10197 | 6050 | 4.34   | 0.4451 | 0.4549 | 0.5451 | 0.5549 | 3963 | 9880 | 6158 | 4138 | 9919 | 5943 | 14.01  | 11.62  |
| 20000 | 1.04 | 0.4500 | 0.5500 | 4050 | 10296 | 6050 | 7.69   | 0.4451 | 0.4549 | 0.5451 | 0.5549 | 3963 | 9880 | 6158 | 4138 | 9919 | 5943 | 21.36  | 18.16  |
| 20000 | 1.05 | 0.4500 | 0.5500 | 4050 | 10395 | 6050 | 11.95  | 0.4451 | 0.4549 | 0.5451 | 0.5549 | 3963 | 9880 | 6158 | 4138 | 9919 | 5943 | 30.70  | 26.69  |
| 20000 | 1.06 | 0.4500 | 0.5500 | 4050 | 10494 | 6050 | 17.12  | 0.4451 | 0.4549 | 0.5451 | 0.5549 | 3963 | 9880 | 6158 | 4138 | 9919 | 5943 | 42.02  | 37.19  |
| 20000 | 1.07 | 0.4500 | 0.5500 | 4050 | 10593 | 6050 | 23.19  | 0.4451 | 0.4549 | 0.5451 | 0.5549 | 3963 | 9880 | 6158 | 4138 | 9919 | 5943 | 55.33  | 49.66  |
| 20000 | 1.08 | 0.4500 | 0.5500 | 4050 | 10692 | 6050 | 30.15  | 0.4451 | 0.4549 | 0.5451 | 0.5549 | 3963 | 9880 | 6158 | 4138 | 9919 | 5943 | 70.62  | 64.11  |
| 20000 | 1.09 | 0.4500 | 0.5500 | 4050 | 10791 | 6050 | 37.97  | 0.4451 | 0.4549 | 0.5451 | 0.5549 | 3963 | 9880 | 6158 | 4138 | 9919 | 5943 | 87.89  | 80.54  |
| 20000 | 1.10 | 0.4500 | 0.5500 | 4050 | 10890 | 6050 | 46.65  | 0.4451 | 0.4549 | 0.5451 | 0.5549 | 3963 | 9880 | 6158 | 4138 | 9919 | 5943 | 107.15 | 98.95  |
| 20000 | 1.11 | 0.4500 | 0.5500 | 4050 | 10989 | 6050 | 56.18  | 0.4451 | 0.4549 | 0.5451 | 0.5549 | 3963 | 9880 | 6158 | 4138 | 9919 | 5943 | 128.40 | 119.33 |
| 20000 | 1.12 | 0.4500 | 0.5500 | 4050 | 11088 | 6050 | 66.54  | 0.4451 | 0.4549 | 0.5451 | 0.5549 | 3963 | 9880 | 6158 | 4138 | 9919 | 5943 | 151.62 | 141.68 |
| 20000 | 1.13 | 0.4500 | 0.5500 | 4050 | 11187 | 6050 | 77.72  | 0.4451 | 0.4549 | 0.5451 | 0.5549 | 3963 | 9880 | 6158 | 4138 | 9919 | 5943 | 176.83 | 166.02 |
| 20000 | 1.14 | 0.4500 | 0.5500 | 4050 | 11286 | 6050 | 89.72  | 0.4451 | 0.4549 | 0.5451 | 0.5549 | 3963 | 9880 | 6158 | 4138 | 9919 | 5943 | 204.03 | 192.33 |
| 20000 | 1.15 | 0.4500 | 0.5500 | 4050 | 11385 | 6050 | 102.51 | 0.4451 | 0.4549 | 0.5451 | 0.5549 | 3963 | 9880 | 6158 | 4138 | 9919 | 5943 | 233.21 | 220.61 |
| 20000 | 1.16 | 0.4500 | 0.5500 | 4050 | 11484 | 6050 | 116.09 | 0.4451 | 0.4549 | 0.5451 | 0.5549 | 3963 | 9880 | 6158 | 4138 | 9919 | 5943 | 264.37 | 250.88 |
| 20000 | 1.17 | 0.4500 | 0.5500 | 4050 | 11583 | 6050 | 130.44 | 0.4451 | 0.4549 | 0.5451 | 0.5549 | 3963 | 9880 | 6158 | 4138 | 9919 | 5943 | 297.52 | 283.11 |
| 20000 | 1.18 | 0.4500 | 0.5500 | 4050 | 11682 | 6050 | 145.57 | 0.4451 | 0.4549 | 0.5451 | 0.5549 | 3963 | 9880 | 6158 | 4138 | 9919 | 5943 | 332.65 | 317.33 |
| 20000 | 1.19 | 0.4500 | 0.5500 | 4050 | 11781 | 6050 | 161.44 | 0.4451 | 0.4549 | 0.5451 | 0.5549 | 3963 | 9880 | 6158 | 4138 | 9919 | 5943 | 369.77 | 353.52 |
| 20000 | 1.20 | 0.4500 | 0.5500 | 4050 | 11880 | 6050 | 178.07 | 0.4451 | 0.4549 | 0.5451 | 0.5549 | 3963 | 9880 | 6158 | 4138 | 9919 | 5943 | 408.87 | 391.69 |
| 20000 | 0.80 | 0.5000 | 0.5000 | 5000 | 8000  | 5000 | 222.22 | 0.4951 | 0.5049 | 0.4951 | 0.5049 | 4902 | 9999 | 5098 | 5098 | 9999 | 4902 | 403.50 | 403.50 |
| 20000 | 0.81 | 0.5000 | 0.5000 | 5000 | 8100  | 5000 | 199.45 | 0.4951 | 0.5049 | 0.4951 | 0.5049 | 4902 | 9999 | 5098 | 5098 | 9999 | 4902 | 364.51 | 364.51 |
| 20000 | 0.82 | 0.5000 | 0.5000 | 5000 | 8200  | 5000 | 178.02 | 0.4951 | 0.5049 | 0.4951 | 0.5049 | 4902 | 9999 | 5098 | 5098 | 9999 | 4902 | 327.53 | 327.53 |
| 20000 | 0.83 | 0.5000 | 0.5000 | 5000 | 8300  | 5000 | 157.92 | 0.4951 | 0.5049 | 0.4951 | 0.5049 | 4902 | 9999 | 5098 | 5098 | 9999 | 4902 | 292.54 | 292.54 |
| 20000 | 0.84 | 0.5000 | 0.5000 | 5000 | 8400  | 5000 | 139.13 | 0.4951 | 0.5049 | 0.4951 | 0.5049 | 4902 | 9999 | 5098 | 5098 | 9999 | 4902 | 259.56 | 259.56 |
| 20000 | 0.85 | 0.5000 | 0.5000 | 5000 | 8500  | 5000 | 121.62 | 0.4951 | 0.5049 | 0.4951 | 0.5049 | 4902 | 9999 | 5098 | 5098 | 9999 | 4902 | 228.58 | 228.58 |
| 20000 | 0.86 | 0.5000 | 0.5000 | 5000 | 8600  | 5000 | 105.38 | 0.4951 | 0.5049 | 0.4951 | 0.5049 | 4902 | 9999 | 5098 | 5098 | 9999 | 4902 | 199.59 | 199.59 |
| 20000 | 0.87 | 0.5000 | 0.5000 | 5000 | 8700  | 5000 | 90.37  | 0.4951 | 0.5049 | 0.4951 | 0.5049 | 4902 | 9999 | 5098 | 5098 | 9999 | 4902 | 172.61 | 172.61 |
| 20000 | 0.88 | 0.5000 | 0.5000 | 5000 | 8800  | 5000 | 76.60  | 0.4951 | 0.5049 | 0.4951 | 0.5049 | 4902 | 9999 | 5098 | 5098 | 9999 | 4902 | 147.63 | 147.63 |
| 20000 | 0.89 | 0.5000 | 0.5000 | 5000 | 8900  | 5000 | 64.02  | 0.4951 | 0.5049 | 0.4951 | 0.5049 | 4902 | 9999 | 5098 | 5098 | 9999 | 4902 | 124.64 | 124.64 |
| 20000 | 0.90 | 0.5000 | 0.5000 | 5000 | 9000  | 5000 | 52.63  | 0.4951 | 0.5049 | 0.4951 | 0.5049 | 4902 | 9999 | 5098 | 5098 | 9999 | 4902 | 103.66 | 103.66 |
| 20000 | 0.91 | 0.5000 | 0.5000 | 5000 | 9100  | 5000 | 42.41  | 0.4951 | 0.5049 | 0.4951 | 0.5049 | 4902 | 9999 | 5098 | 5098 | 9999 | 4902 | 84.68  | 84.68  |
| 20000 | 0.92 | 0.5000 | 0.5000 | 5000 | 9200  | 5000 | 33.33  | 0.4951 | 0.5049 | 0.4951 | 0.5049 | 4902 | 9999 | 5098 | 5098 | 9999 | 4902 | 67.69  | 67.69  |

|       |      |        |        |      |       |      |        |        |        |        |        |      |      |      |      |      |      |        |        |
|-------|------|--------|--------|------|-------|------|--------|--------|--------|--------|--------|------|------|------|------|------|------|--------|--------|
| 20000 | 0.93 | 0.5000 | 0.5000 | 5000 | 9300  | 5000 | 25.39  | 0.4951 | 0.5049 | 0.4951 | 0.5049 | 4902 | 9999 | 5098 | 5098 | 9999 | 4902 | 52.71  | 52.71  |
| 20000 | 0.94 | 0.5000 | 0.5000 | 5000 | 9400  | 5000 | 18.56  | 0.4951 | 0.5049 | 0.4951 | 0.5049 | 4902 | 9999 | 5098 | 5098 | 9999 | 4902 | 39.73  | 39.73  |
| 20000 | 0.95 | 0.5000 | 0.5000 | 5000 | 9500  | 5000 | 12.82  | 0.4951 | 0.5049 | 0.4951 | 0.5049 | 4902 | 9999 | 5098 | 5098 | 9999 | 4902 | 28.75  | 28.75  |
| 20000 | 0.96 | 0.5000 | 0.5000 | 5000 | 9600  | 5000 | 8.16   | 0.4951 | 0.5049 | 0.4951 | 0.5049 | 4902 | 9999 | 5098 | 5098 | 9999 | 4902 | 19.77  | 19.77  |
| 20000 | 0.97 | 0.5000 | 0.5000 | 5000 | 9700  | 5000 | 4.57   | 0.4951 | 0.5049 | 0.4951 | 0.5049 | 4902 | 9999 | 5098 | 5098 | 9999 | 4902 | 12.79  | 12.79  |
| 20000 | 0.98 | 0.5000 | 0.5000 | 5000 | 9800  | 5000 | 2.02   | 0.4951 | 0.5049 | 0.4951 | 0.5049 | 4902 | 9999 | 5098 | 5098 | 9999 | 4902 | 7.80   | 7.80   |
| 20000 | 0.99 | 0.5000 | 0.5000 | 5000 | 9900  | 5000 | 0.50   | 0.4951 | 0.5049 | 0.4951 | 0.5049 | 4902 | 9999 | 5098 | 5098 | 9999 | 4902 | 4.82   | 4.82   |
| 20000 | 1.00 | 0.5000 | 0.5000 | 5000 | 10000 | 5000 | 0.00   | 0.4951 | 0.5049 | 0.4951 | 0.5049 | 4902 | 9999 | 5098 | 5098 | 9999 | 4902 | 3.84   | 3.84   |
| 20000 | 1.01 | 0.5000 | 0.5000 | 5000 | 10100 | 5000 | 0.50   | 0.4951 | 0.5049 | 0.4951 | 0.5049 | 4902 | 9999 | 5098 | 5098 | 9999 | 4902 | 4.86   | 4.86   |
| 20000 | 1.02 | 0.5000 | 0.5000 | 5000 | 10200 | 5000 | 1.98   | 0.4951 | 0.5049 | 0.4951 | 0.5049 | 4902 | 9999 | 5098 | 5098 | 9999 | 4902 | 7.88   | 7.88   |
| 20000 | 1.03 | 0.5000 | 0.5000 | 5000 | 10300 | 5000 | 4.43   | 0.4951 | 0.5049 | 0.4951 | 0.5049 | 4902 | 9999 | 5098 | 5098 | 9999 | 4902 | 12.90  | 12.90  |
| 20000 | 1.04 | 0.5000 | 0.5000 | 5000 | 10400 | 5000 | 7.84   | 0.4951 | 0.5049 | 0.4951 | 0.5049 | 4902 | 9999 | 5098 | 5098 | 9999 | 4902 | 19.92  | 19.92  |
| 20000 | 1.05 | 0.5000 | 0.5000 | 5000 | 10500 | 5000 | 12.20  | 0.4951 | 0.5049 | 0.4951 | 0.5049 | 4902 | 9999 | 5098 | 5098 | 9999 | 4902 | 28.94  | 28.94  |
| 20000 | 1.06 | 0.5000 | 0.5000 | 5000 | 10600 | 5000 | 17.48  | 0.4951 | 0.5049 | 0.4951 | 0.5049 | 4902 | 9999 | 5098 | 5098 | 9999 | 4902 | 39.96  | 39.96  |
| 20000 | 1.07 | 0.5000 | 0.5000 | 5000 | 10700 | 5000 | 23.67  | 0.4951 | 0.5049 | 0.4951 | 0.5049 | 4902 | 9999 | 5098 | 5098 | 9999 | 4902 | 52.98  | 52.98  |
| 20000 | 1.08 | 0.5000 | 0.5000 | 5000 | 10800 | 5000 | 30.77  | 0.4951 | 0.5049 | 0.4951 | 0.5049 | 4902 | 9999 | 5098 | 5098 | 9999 | 4902 | 68.00  | 68.00  |
| 20000 | 1.09 | 0.5000 | 0.5000 | 5000 | 10900 | 5000 | 38.76  | 0.4951 | 0.5049 | 0.4951 | 0.5049 | 4902 | 9999 | 5098 | 5098 | 9999 | 4902 | 85.02  | 85.02  |
| 20000 | 1.10 | 0.5000 | 0.5000 | 5000 | 11000 | 5000 | 47.62  | 0.4951 | 0.5049 | 0.4951 | 0.5049 | 4902 | 9999 | 5098 | 5098 | 9999 | 4902 | 104.04 | 104.04 |
| 20000 | 1.11 | 0.5000 | 0.5000 | 5000 | 11100 | 5000 | 57.35  | 0.4951 | 0.5049 | 0.4951 | 0.5049 | 4902 | 9999 | 5098 | 5098 | 9999 | 4902 | 125.07 | 125.07 |
| 20000 | 1.12 | 0.5000 | 0.5000 | 5000 | 11200 | 5000 | 67.92  | 0.4951 | 0.5049 | 0.4951 | 0.5049 | 4902 | 9999 | 5098 | 5098 | 9999 | 4902 | 148.09 | 148.09 |
| 20000 | 1.13 | 0.5000 | 0.5000 | 5000 | 11300 | 5000 | 79.34  | 0.4951 | 0.5049 | 0.4951 | 0.5049 | 4902 | 9999 | 5098 | 5098 | 9999 | 4902 | 173.11 | 173.11 |
| 20000 | 1.14 | 0.5000 | 0.5000 | 5000 | 11400 | 5000 | 91.59  | 0.4951 | 0.5049 | 0.4951 | 0.5049 | 4902 | 9999 | 5098 | 5098 | 9999 | 4902 | 200.13 | 200.13 |
| 20000 | 1.15 | 0.5000 | 0.5000 | 5000 | 11500 | 5000 | 104.65 | 0.4951 | 0.5049 | 0.4951 | 0.5049 | 4902 | 9999 | 5098 | 5098 | 9999 | 4902 | 229.15 | 229.15 |
| 20000 | 1.16 | 0.5000 | 0.5000 | 5000 | 11600 | 5000 | 118.52 | 0.4951 | 0.5049 | 0.4951 | 0.5049 | 4902 | 9999 | 5098 | 5098 | 9999 | 4902 | 260.17 | 260.17 |
| 20000 | 1.17 | 0.5000 | 0.5000 | 5000 | 11700 | 5000 | 133.18 | 0.4951 | 0.5049 | 0.4951 | 0.5049 | 4902 | 9999 | 5098 | 5098 | 9999 | 4902 | 293.20 | 293.20 |
| 20000 | 1.18 | 0.5000 | 0.5000 | 5000 | 11800 | 5000 | 148.62 | 0.4951 | 0.5049 | 0.4951 | 0.5049 | 4902 | 9999 | 5098 | 5098 | 9999 | 4902 | 328.22 | 328.22 |
| 20000 | 1.19 | 0.5000 | 0.5000 | 5000 | 11900 | 5000 | 164.84 | 0.4951 | 0.5049 | 0.4951 | 0.5049 | 4902 | 9999 | 5098 | 5098 | 9999 | 4902 | 365.24 | 365.24 |
| 20000 | 1.20 | 0.5000 | 0.5000 | 5000 | 12000 | 5000 | 181.82 | 0.4951 | 0.5049 | 0.4951 | 0.5049 | 4902 | 9999 | 5098 | 5098 | 9999 | 4902 | 404.26 | 404.26 |
| 20000 | 0.80 | 0.5500 | 0.4500 | 6050 | 7920  | 4050 | 218.10 | 0.5451 | 0.5549 | 0.4451 | 0.4549 | 5943 | 9919 | 4138 | 6158 | 9880 | 3963 | 406.50 | 392.47 |
| 20000 | 0.81 | 0.5500 | 0.4500 | 6050 | 8019  | 4050 | 195.73 | 0.5451 | 0.5549 | 0.4451 | 0.4549 | 5943 | 9919 | 4138 | 6158 | 9880 | 3963 | 367.59 | 354.19 |
| 20000 | 0.82 | 0.5500 | 0.4500 | 6050 | 8118  | 4050 | 174.69 | 0.5451 | 0.5549 | 0.4451 | 0.4549 | 5943 | 9919 | 4138 | 6158 | 9880 | 3963 | 330.66 | 317.90 |
| 20000 | 0.83 | 0.5500 | 0.4500 | 6050 | 8217  | 4050 | 154.95 | 0.5451 | 0.5549 | 0.4451 | 0.4549 | 5943 | 9919 | 4138 | 6158 | 9880 | 3963 | 295.71 | 283.58 |
| 20000 | 0.84 | 0.5500 | 0.4500 | 6050 | 8316  | 4050 | 136.50 | 0.5451 | 0.5549 | 0.4451 | 0.4549 | 5943 | 9919 | 4138 | 6158 | 9880 | 3963 | 262.73 | 251.26 |
| 20000 | 0.85 | 0.5500 | 0.4500 | 6050 | 8415  | 4050 | 119.31 | 0.5451 | 0.5549 | 0.4451 | 0.4549 | 5943 | 9919 | 4138 | 6158 | 9880 | 3963 | 231.72 | 220.91 |
| 20000 | 0.86 | 0.5500 | 0.4500 | 6050 | 8514  | 4050 | 103.37 | 0.5451 | 0.5549 | 0.4451 | 0.4549 | 5943 | 9919 | 4138 | 6158 | 9880 | 3963 | 202.70 | 192.55 |

|       |      |        |        |      |       |      |        |        |        |        |        |      |      |      |      |      |      |        |        |
|-------|------|--------|--------|------|-------|------|--------|--------|--------|--------|--------|------|------|------|------|------|------|--------|--------|
| 20000 | 0.87 | 0.5500 | 0.4500 | 6050 | 8613  | 4050 | 88.65  | 0.5451 | 0.5549 | 0.4451 | 0.4549 | 5943 | 9919 | 4138 | 6158 | 9880 | 3963 | 175.65 | 166.18 |
| 20000 | 0.88 | 0.5500 | 0.4500 | 6050 | 8712  | 4050 | 75.13  | 0.5451 | 0.5549 | 0.4451 | 0.4549 | 5943 | 9919 | 4138 | 6158 | 9880 | 3963 | 150.57 | 141.79 |
| 20000 | 0.89 | 0.5500 | 0.4500 | 6050 | 8811  | 4050 | 62.79  | 0.5451 | 0.5549 | 0.4451 | 0.4549 | 5943 | 9919 | 4138 | 6158 | 9880 | 3963 | 127.47 | 119.38 |
| 20000 | 0.90 | 0.5500 | 0.4500 | 6050 | 8910  | 4050 | 51.61  | 0.5451 | 0.5549 | 0.4451 | 0.4549 | 5943 | 9919 | 4138 | 6158 | 9880 | 3963 | 106.35 | 98.96  |
| 20000 | 0.91 | 0.5500 | 0.4500 | 6050 | 9009  | 4050 | 41.59  | 0.5451 | 0.5549 | 0.4451 | 0.4549 | 5943 | 9919 | 4138 | 6158 | 9880 | 3963 | 87.21  | 80.52  |
| 20000 | 0.92 | 0.5500 | 0.4500 | 6050 | 9108  | 4050 | 32.68  | 0.5451 | 0.5549 | 0.4451 | 0.4549 | 5943 | 9919 | 4138 | 6158 | 9880 | 3963 | 70.04  | 64.06  |
| 20000 | 0.93 | 0.5500 | 0.4500 | 6050 | 9207  | 4050 | 24.89  | 0.5451 | 0.5549 | 0.4451 | 0.4549 | 5943 | 9919 | 4138 | 6158 | 9880 | 3963 | 54.85  | 49.59  |
| 20000 | 0.94 | 0.5500 | 0.4500 | 6050 | 9306  | 4050 | 18.19  | 0.5451 | 0.5549 | 0.4451 | 0.4549 | 5943 | 9919 | 4138 | 6158 | 9880 | 3963 | 41.63  | 37.10  |
| 20000 | 0.95 | 0.5500 | 0.4500 | 6050 | 9405  | 4050 | 12.57  | 0.5451 | 0.5549 | 0.4451 | 0.4549 | 5943 | 9919 | 4138 | 6158 | 9880 | 3963 | 30.39  | 26.60  |
| 20000 | 0.96 | 0.5500 | 0.4500 | 6050 | 9504  | 4050 | 8.00   | 0.5451 | 0.5549 | 0.4451 | 0.4549 | 5943 | 9919 | 4138 | 6158 | 9880 | 3963 | 21.13  | 18.08  |
| 20000 | 0.97 | 0.5500 | 0.4500 | 6050 | 9603  | 4050 | 4.48   | 0.5451 | 0.5549 | 0.4451 | 0.4549 | 5943 | 9919 | 4138 | 6158 | 9880 | 3963 | 13.84  | 11.55  |
| 20000 | 0.98 | 0.5500 | 0.4500 | 6050 | 9702  | 4050 | 1.98   | 0.5451 | 0.5549 | 0.4451 | 0.4549 | 5943 | 9919 | 4138 | 6158 | 9880 | 3963 | 8.53   | 7.00   |
| 20000 | 0.99 | 0.5500 | 0.4500 | 6050 | 9801  | 4050 | 0.49   | 0.5451 | 0.5549 | 0.4451 | 0.4549 | 5943 | 9919 | 4138 | 6158 | 9880 | 3963 | 5.19   | 4.43   |
| 20000 | 1.00 | 0.5500 | 0.4500 | 6050 | 9900  | 4050 | 0.00   | 0.5451 | 0.5549 | 0.4451 | 0.4549 | 5943 | 9919 | 4138 | 6158 | 9880 | 3963 | 3.83   | 3.85   |
| 20000 | 1.01 | 0.5500 | 0.4500 | 6050 | 9999  | 4050 | 0.49   | 0.5451 | 0.5549 | 0.4451 | 0.4549 | 5943 | 9919 | 4138 | 6158 | 9880 | 3963 | 4.45   | 5.25   |
| 20000 | 1.02 | 0.5500 | 0.4500 | 6050 | 10098 | 4050 | 1.94   | 0.5451 | 0.5549 | 0.4451 | 0.4549 | 5943 | 9919 | 4138 | 6158 | 9880 | 3963 | 7.05   | 8.64   |
| 20000 | 1.03 | 0.5500 | 0.4500 | 6050 | 10197 | 4050 | 4.34   | 0.5451 | 0.5549 | 0.4451 | 0.4549 | 5943 | 9919 | 4138 | 6158 | 9880 | 3963 | 11.62  | 14.01  |
| 20000 | 1.04 | 0.5500 | 0.4500 | 6050 | 10296 | 4050 | 7.69   | 0.5451 | 0.5549 | 0.4451 | 0.4549 | 5943 | 9919 | 4138 | 6158 | 9880 | 3963 | 18.16  | 21.36  |
| 20000 | 1.05 | 0.5500 | 0.4500 | 6050 | 10395 | 4050 | 11.95  | 0.5451 | 0.5549 | 0.4451 | 0.4549 | 5943 | 9919 | 4138 | 6158 | 9880 | 3963 | 26.69  | 30.70  |
| 20000 | 1.06 | 0.5500 | 0.4500 | 6050 | 10494 | 4050 | 17.12  | 0.5451 | 0.5549 | 0.4451 | 0.4549 | 5943 | 9919 | 4138 | 6158 | 9880 | 3963 | 37.19  | 42.02  |
| 20000 | 1.07 | 0.5500 | 0.4500 | 6050 | 10593 | 4050 | 23.19  | 0.5451 | 0.5549 | 0.4451 | 0.4549 | 5943 | 9919 | 4138 | 6158 | 9880 | 3963 | 49.66  | 55.33  |
| 20000 | 1.08 | 0.5500 | 0.4500 | 6050 | 10692 | 4050 | 30.15  | 0.5451 | 0.5549 | 0.4451 | 0.4549 | 5943 | 9919 | 4138 | 6158 | 9880 | 3963 | 64.11  | 70.62  |
| 20000 | 1.09 | 0.5500 | 0.4500 | 6050 | 10791 | 4050 | 37.97  | 0.5451 | 0.5549 | 0.4451 | 0.4549 | 5943 | 9919 | 4138 | 6158 | 9880 | 3963 | 80.54  | 87.89  |
| 20000 | 1.10 | 0.5500 | 0.4500 | 6050 | 10890 | 4050 | 46.65  | 0.5451 | 0.5549 | 0.4451 | 0.4549 | 5943 | 9919 | 4138 | 6158 | 9880 | 3963 | 98.95  | 107.15 |
| 20000 | 1.11 | 0.5500 | 0.4500 | 6050 | 10989 | 4050 | 56.18  | 0.5451 | 0.5549 | 0.4451 | 0.4549 | 5943 | 9919 | 4138 | 6158 | 9880 | 3963 | 119.33 | 128.40 |
| 20000 | 1.12 | 0.5500 | 0.4500 | 6050 | 11088 | 4050 | 66.54  | 0.5451 | 0.5549 | 0.4451 | 0.4549 | 5943 | 9919 | 4138 | 6158 | 9880 | 3963 | 141.68 | 151.62 |
| 20000 | 1.13 | 0.5500 | 0.4500 | 6050 | 11187 | 4050 | 77.72  | 0.5451 | 0.5549 | 0.4451 | 0.4549 | 5943 | 9919 | 4138 | 6158 | 9880 | 3963 | 166.02 | 176.83 |
| 20000 | 1.14 | 0.5500 | 0.4500 | 6050 | 11286 | 4050 | 89.72  | 0.5451 | 0.5549 | 0.4451 | 0.4549 | 5943 | 9919 | 4138 | 6158 | 9880 | 3963 | 192.33 | 204.03 |
| 20000 | 1.15 | 0.5500 | 0.4500 | 6050 | 11385 | 4050 | 102.51 | 0.5451 | 0.5549 | 0.4451 | 0.4549 | 5943 | 9919 | 4138 | 6158 | 9880 | 3963 | 220.61 | 233.21 |
| 20000 | 1.16 | 0.5500 | 0.4500 | 6050 | 11484 | 4050 | 116.09 | 0.5451 | 0.5549 | 0.4451 | 0.4549 | 5943 | 9919 | 4138 | 6158 | 9880 | 3963 | 250.88 | 264.37 |
| 20000 | 1.17 | 0.5500 | 0.4500 | 6050 | 11583 | 4050 | 130.44 | 0.5451 | 0.5549 | 0.4451 | 0.4549 | 5943 | 9919 | 4138 | 6158 | 9880 | 3963 | 283.11 | 297.52 |
| 20000 | 1.18 | 0.5500 | 0.4500 | 6050 | 11682 | 4050 | 145.57 | 0.5451 | 0.5549 | 0.4451 | 0.4549 | 5943 | 9919 | 4138 | 6158 | 9880 | 3963 | 317.33 | 332.65 |
| 20000 | 1.19 | 0.5500 | 0.4500 | 6050 | 11781 | 4050 | 161.44 | 0.5451 | 0.5549 | 0.4451 | 0.4549 | 5943 | 9919 | 4138 | 6158 | 9880 | 3963 | 353.52 | 369.77 |
| 20000 | 1.20 | 0.5500 | 0.4500 | 6050 | 11880 | 4050 | 178.07 | 0.5451 | 0.5549 | 0.4451 | 0.4549 | 5943 | 9919 | 4138 | 6158 | 9880 | 3963 | 391.69 | 408.87 |
| 20000 | 0.80 | 0.6000 | 0.4000 | 7200 | 7680  | 3200 | 205.91 | 0.5952 | 0.6048 | 0.3952 | 0.4048 | 7085 | 9637 | 3277 | 7316 | 9561 | 3124 | 401.27 | 373.64 |

|       |      |        |        |      |       |      |        |        |        |        |        |      |      |      |      |      |      |        |        |
|-------|------|--------|--------|------|-------|------|--------|--------|--------|--------|--------|------|------|------|------|------|------|--------|--------|
| 20000 | 0.81 | 0.6000 | 0.4000 | 7200 | 7776  | 3200 | 184.75 | 0.5952 | 0.6048 | 0.3952 | 0.4048 | 7085 | 9637 | 3277 | 7316 | 9561 | 3124 | 363.23 | 336.84 |
| 20000 | 0.82 | 0.6000 | 0.4000 | 7200 | 7872  | 3200 | 164.84 | 0.5952 | 0.6048 | 0.3952 | 0.4048 | 7085 | 9637 | 3277 | 7316 | 9561 | 3124 | 327.10 | 301.96 |
| 20000 | 0.83 | 0.6000 | 0.4000 | 7200 | 7968  | 3200 | 146.18 | 0.5952 | 0.6048 | 0.3952 | 0.4048 | 7085 | 9637 | 3277 | 7316 | 9561 | 3124 | 292.88 | 269.01 |
| 20000 | 0.84 | 0.6000 | 0.4000 | 7200 | 8064  | 3200 | 128.75 | 0.5952 | 0.6048 | 0.3952 | 0.4048 | 7085 | 9637 | 3277 | 7316 | 9561 | 3124 | 260.58 | 237.99 |
| 20000 | 0.85 | 0.6000 | 0.4000 | 7200 | 8160  | 3200 | 112.51 | 0.5952 | 0.6048 | 0.3952 | 0.4048 | 7085 | 9637 | 3277 | 7316 | 9561 | 3124 | 230.19 | 208.90 |
| 20000 | 0.86 | 0.6000 | 0.4000 | 7200 | 8256  | 3200 | 97.45  | 0.5952 | 0.6048 | 0.3952 | 0.4048 | 7085 | 9637 | 3277 | 7316 | 9561 | 3124 | 201.71 | 181.73 |
| 20000 | 0.87 | 0.6000 | 0.4000 | 7200 | 8352  | 3200 | 83.55  | 0.5952 | 0.6048 | 0.3952 | 0.4048 | 7085 | 9637 | 3277 | 7316 | 9561 | 3124 | 175.14 | 156.50 |
| 20000 | 0.88 | 0.6000 | 0.4000 | 7200 | 8448  | 3200 | 70.79  | 0.5952 | 0.6048 | 0.3952 | 0.4048 | 7085 | 9637 | 3277 | 7316 | 9561 | 3124 | 150.49 | 133.19 |
| 20000 | 0.89 | 0.6000 | 0.4000 | 7200 | 8544  | 3200 | 59.16  | 0.5952 | 0.6048 | 0.3952 | 0.4048 | 7085 | 9637 | 3277 | 7316 | 9561 | 3124 | 127.75 | 111.81 |
| 20000 | 0.90 | 0.6000 | 0.4000 | 7200 | 8640  | 3200 | 48.62  | 0.5952 | 0.6048 | 0.3952 | 0.4048 | 7085 | 9637 | 3277 | 7316 | 9561 | 3124 | 106.92 | 92.35  |
| 20000 | 0.91 | 0.6000 | 0.4000 | 7200 | 8736  | 3200 | 39.16  | 0.5952 | 0.6048 | 0.3952 | 0.4048 | 7085 | 9637 | 3277 | 7316 | 9561 | 3124 | 88.01  | 74.83  |
| 20000 | 0.92 | 0.6000 | 0.4000 | 7200 | 8832  | 3200 | 30.78  | 0.5952 | 0.6048 | 0.3952 | 0.4048 | 7085 | 9637 | 3277 | 7316 | 9561 | 3124 | 71.00  | 59.23  |
| 20000 | 0.93 | 0.6000 | 0.4000 | 7200 | 8928  | 3200 | 23.43  | 0.5952 | 0.6048 | 0.3952 | 0.4048 | 7085 | 9637 | 3277 | 7316 | 9561 | 3124 | 55.91  | 45.56  |
| 20000 | 0.94 | 0.6000 | 0.4000 | 7200 | 9024  | 3200 | 17.12  | 0.5952 | 0.6048 | 0.3952 | 0.4048 | 7085 | 9637 | 3277 | 7316 | 9561 | 3124 | 42.73  | 33.82  |
| 20000 | 0.95 | 0.6000 | 0.4000 | 7200 | 9120  | 3200 | 11.83  | 0.5952 | 0.6048 | 0.3952 | 0.4048 | 7085 | 9637 | 3277 | 7316 | 9561 | 3124 | 31.47  | 24.01  |
| 20000 | 0.96 | 0.6000 | 0.4000 | 7200 | 9216  | 3200 | 7.53   | 0.5952 | 0.6048 | 0.3952 | 0.4048 | 7085 | 9637 | 3277 | 7316 | 9561 | 3124 | 22.11  | 16.12  |
| 20000 | 0.97 | 0.6000 | 0.4000 | 7200 | 9312  | 3200 | 4.21   | 0.5952 | 0.6048 | 0.3952 | 0.4048 | 7085 | 9637 | 3277 | 7316 | 9561 | 3124 | 14.67  | 10.16  |
| 20000 | 0.98 | 0.6000 | 0.4000 | 7200 | 9408  | 3200 | 1.86   | 0.5952 | 0.6048 | 0.3952 | 0.4048 | 7085 | 9637 | 3277 | 7316 | 9561 | 3124 | 9.15   | 6.13   |
| 20000 | 0.99 | 0.6000 | 0.4000 | 7200 | 9504  | 3200 | 0.46   | 0.5952 | 0.6048 | 0.3952 | 0.4048 | 7085 | 9637 | 3277 | 7316 | 9561 | 3124 | 5.53   | 4.03   |
| 20000 | 1.00 | 0.6000 | 0.4000 | 7200 | 9600  | 3200 | 0.00   | 0.5952 | 0.6048 | 0.3952 | 0.4048 | 7085 | 9637 | 3277 | 7316 | 9561 | 3124 | 3.83   | 3.86   |
| 20000 | 1.01 | 0.6000 | 0.4000 | 7200 | 9696  | 3200 | 0.46   | 0.5952 | 0.6048 | 0.3952 | 0.4048 | 7085 | 9637 | 3277 | 7316 | 9561 | 3124 | 4.04   | 5.61   |
| 20000 | 1.02 | 0.6000 | 0.4000 | 7200 | 9792  | 3200 | 1.82   | 0.5952 | 0.6048 | 0.3952 | 0.4048 | 7085 | 9637 | 3277 | 7316 | 9561 | 3124 | 6.16   | 9.29   |
| 20000 | 1.03 | 0.6000 | 0.4000 | 7200 | 9888  | 3200 | 4.08   | 0.5952 | 0.6048 | 0.3952 | 0.4048 | 7085 | 9637 | 3277 | 7316 | 9561 | 3124 | 10.19  | 14.90  |
| 20000 | 1.04 | 0.6000 | 0.4000 | 7200 | 9984  | 3200 | 7.22   | 0.5952 | 0.6048 | 0.3952 | 0.4048 | 7085 | 9637 | 3277 | 7316 | 9561 | 3124 | 16.14  | 22.44  |
| 20000 | 1.05 | 0.6000 | 0.4000 | 7200 | 10080 | 3200 | 11.23  | 0.5952 | 0.6048 | 0.3952 | 0.4048 | 7085 | 9637 | 3277 | 7316 | 9561 | 3124 | 24.00  | 31.91  |
| 20000 | 1.06 | 0.6000 | 0.4000 | 7200 | 10176 | 3200 | 16.09  | 0.5952 | 0.6048 | 0.3952 | 0.4048 | 7085 | 9637 | 3277 | 7316 | 9561 | 3124 | 33.77  | 43.30  |
| 20000 | 1.07 | 0.6000 | 0.4000 | 7200 | 10272 | 3200 | 21.79  | 0.5952 | 0.6048 | 0.3952 | 0.4048 | 7085 | 9637 | 3277 | 7316 | 9561 | 3124 | 45.46  | 56.62  |
| 20000 | 1.08 | 0.6000 | 0.4000 | 7200 | 10368 | 3200 | 28.32  | 0.5952 | 0.6048 | 0.3952 | 0.4048 | 7085 | 9637 | 3277 | 7316 | 9561 | 3124 | 59.05  | 71.87  |
| 20000 | 1.09 | 0.6000 | 0.4000 | 7200 | 10464 | 3200 | 35.66  | 0.5952 | 0.6048 | 0.3952 | 0.4048 | 7085 | 9637 | 3277 | 7316 | 9561 | 3124 | 74.56  | 89.05  |
| 20000 | 1.10 | 0.6000 | 0.4000 | 7200 | 10560 | 3200 | 43.81  | 0.5952 | 0.6048 | 0.3952 | 0.4048 | 7085 | 9637 | 3277 | 7316 | 9561 | 3124 | 91.99  | 108.15 |
| 20000 | 1.11 | 0.6000 | 0.4000 | 7200 | 10656 | 3200 | 52.75  | 0.5952 | 0.6048 | 0.3952 | 0.4048 | 7085 | 9637 | 3277 | 7316 | 9561 | 3124 | 111.32 | 129.18 |
| 20000 | 1.12 | 0.6000 | 0.4000 | 7200 | 10752 | 3200 | 62.47  | 0.5952 | 0.6048 | 0.3952 | 0.4048 | 7085 | 9637 | 3277 | 7316 | 9561 | 3124 | 132.57 | 152.14 |
| 20000 | 1.13 | 0.6000 | 0.4000 | 7200 | 10848 | 3200 | 72.97  | 0.5952 | 0.6048 | 0.3952 | 0.4048 | 7085 | 9637 | 3277 | 7316 | 9561 | 3124 | 155.73 | 177.03 |
| 20000 | 1.14 | 0.6000 | 0.4000 | 7200 | 10944 | 3200 | 84.22  | 0.5952 | 0.6048 | 0.3952 | 0.4048 | 7085 | 9637 | 3277 | 7316 | 9561 | 3124 | 180.80 | 203.85 |
| 20000 | 1.15 | 0.6000 | 0.4000 | 7200 | 11040 | 3200 | 96.21  | 0.5952 | 0.6048 | 0.3952 | 0.4048 | 7085 | 9637 | 3277 | 7316 | 9561 | 3124 | 207.78 | 232.59 |

|       |      |        |        |      |       |      |        |        |        |        |        |      |      |      |      |      |      |        |        |
|-------|------|--------|--------|------|-------|------|--------|--------|--------|--------|--------|------|------|------|------|------|------|--------|--------|
| 20000 | 1.16 | 0.6000 | 0.4000 | 7200 | 11136 | 3200 | 108.95 | 0.5952 | 0.6048 | 0.3952 | 0.4048 | 7085 | 9637 | 3277 | 7316 | 9561 | 3124 | 236.68 | 263.27 |
| 20000 | 1.17 | 0.6000 | 0.4000 | 7200 | 11232 | 3200 | 122.41 | 0.5952 | 0.6048 | 0.3952 | 0.4048 | 7085 | 9637 | 3277 | 7316 | 9561 | 3124 | 267.49 | 295.87 |
| 20000 | 1.18 | 0.6000 | 0.4000 | 7200 | 11328 | 3200 | 136.59 | 0.5952 | 0.6048 | 0.3952 | 0.4048 | 7085 | 9637 | 3277 | 7316 | 9561 | 3124 | 300.21 | 330.39 |
| 20000 | 1.19 | 0.6000 | 0.4000 | 7200 | 11424 | 3200 | 151.48 | 0.5952 | 0.6048 | 0.3952 | 0.4048 | 7085 | 9637 | 3277 | 7316 | 9561 | 3124 | 334.85 | 366.85 |
| 20000 | 1.20 | 0.6000 | 0.4000 | 7200 | 11520 | 3200 | 167.06 | 0.5952 | 0.6048 | 0.3952 | 0.4048 | 7085 | 9637 | 3277 | 7316 | 9561 | 3124 | 371.40 | 405.23 |
| 20000 | 0.80 | 0.6500 | 0.3500 | 8450 | 7280  | 2450 | 186.28 | 0.6453 | 0.6547 | 0.3453 | 0.3547 | 8329 | 9155 | 2516 | 8572 | 9043 | 2385 | 387.58 | 347.23 |
| 20000 | 0.81 | 0.6500 | 0.3500 | 8450 | 7371  | 2450 | 167.05 | 0.6453 | 0.6547 | 0.3453 | 0.3547 | 8329 | 9155 | 2516 | 8572 | 9043 | 2385 | 351.20 | 312.66 |
| 20000 | 0.82 | 0.6500 | 0.3500 | 8450 | 7462  | 2450 | 148.99 | 0.6453 | 0.6547 | 0.3453 | 0.3547 | 8329 | 9155 | 2516 | 8572 | 9043 | 2385 | 316.64 | 279.93 |
| 20000 | 0.83 | 0.6500 | 0.3500 | 8450 | 7553  | 2450 | 132.07 | 0.6453 | 0.6547 | 0.3453 | 0.3547 | 8329 | 9155 | 2516 | 8572 | 9043 | 2385 | 283.88 | 249.02 |
| 20000 | 0.84 | 0.6500 | 0.3500 | 8450 | 7644  | 2450 | 116.27 | 0.6453 | 0.6547 | 0.3453 | 0.3547 | 8329 | 9155 | 2516 | 8572 | 9043 | 2385 | 252.94 | 219.95 |
| 20000 | 0.85 | 0.6500 | 0.3500 | 8450 | 7735  | 2450 | 101.57 | 0.6453 | 0.6547 | 0.3453 | 0.3547 | 8329 | 9155 | 2516 | 8572 | 9043 | 2385 | 223.80 | 192.71 |
| 20000 | 0.86 | 0.6500 | 0.3500 | 8450 | 7826  | 2450 | 87.94  | 0.6453 | 0.6547 | 0.3453 | 0.3547 | 8329 | 9155 | 2516 | 8572 | 9043 | 2385 | 196.47 | 167.30 |
| 20000 | 0.87 | 0.6500 | 0.3500 | 8450 | 7917  | 2450 | 75.37  | 0.6453 | 0.6547 | 0.3453 | 0.3547 | 8329 | 9155 | 2516 | 8572 | 9043 | 2385 | 170.95 | 143.72 |
| 20000 | 0.88 | 0.6500 | 0.3500 | 8450 | 8008  | 2450 | 63.84  | 0.6453 | 0.6547 | 0.3453 | 0.3547 | 8329 | 9155 | 2516 | 8572 | 9043 | 2385 | 147.24 | 121.97 |
| 20000 | 0.89 | 0.6500 | 0.3500 | 8450 | 8099  | 2450 | 53.33  | 0.6453 | 0.6547 | 0.3453 | 0.3547 | 8329 | 9155 | 2516 | 8572 | 9043 | 2385 | 125.34 | 102.06 |
| 20000 | 0.90 | 0.6500 | 0.3500 | 8450 | 8190  | 2450 | 43.81  | 0.6453 | 0.6547 | 0.3453 | 0.3547 | 8329 | 9155 | 2516 | 8572 | 9043 | 2385 | 105.25 | 83.97  |
| 20000 | 0.91 | 0.6500 | 0.3500 | 8450 | 8281  | 2450 | 35.28  | 0.6453 | 0.6547 | 0.3453 | 0.3547 | 8329 | 9155 | 2516 | 8572 | 9043 | 2385 | 86.96  | 67.72  |
| 20000 | 0.92 | 0.6500 | 0.3500 | 8450 | 8372  | 2450 | 27.72  | 0.6453 | 0.6547 | 0.3453 | 0.3547 | 8329 | 9155 | 2516 | 8572 | 9043 | 2385 | 70.49  | 53.30  |
| 20000 | 0.93 | 0.6500 | 0.3500 | 8450 | 8463  | 2450 | 21.10  | 0.6453 | 0.6547 | 0.3453 | 0.3547 | 8329 | 9155 | 2516 | 8572 | 9043 | 2385 | 55.82  | 40.71  |
| 20000 | 0.94 | 0.6500 | 0.3500 | 8450 | 8554  | 2450 | 15.41  | 0.6453 | 0.6547 | 0.3453 | 0.3547 | 8329 | 9155 | 2516 | 8572 | 9043 | 2385 | 42.97  | 29.95  |
| 20000 | 0.95 | 0.6500 | 0.3500 | 8450 | 8645  | 2450 | 10.64  | 0.6453 | 0.6547 | 0.3453 | 0.3547 | 8329 | 9155 | 2516 | 8572 | 9043 | 2385 | 31.92  | 21.03  |
| 20000 | 0.96 | 0.6500 | 0.3500 | 8450 | 8736  | 2450 | 6.77   | 0.6453 | 0.6547 | 0.3453 | 0.3547 | 8329 | 9155 | 2516 | 8572 | 9043 | 2385 | 22.68  | 13.93  |
| 20000 | 0.97 | 0.6500 | 0.3500 | 8450 | 8827  | 2450 | 3.79   | 0.6453 | 0.6547 | 0.3453 | 0.3547 | 8329 | 9155 | 2516 | 8572 | 9043 | 2385 | 15.25  | 8.67   |
| 20000 | 0.98 | 0.6500 | 0.3500 | 8450 | 8918  | 2450 | 1.67   | 0.6453 | 0.6547 | 0.3453 | 0.3547 | 8329 | 9155 | 2516 | 8572 | 9043 | 2385 | 9.63   | 5.24   |
| 20000 | 0.99 | 0.6500 | 0.3500 | 8450 | 9009  | 2450 | 0.42   | 0.6453 | 0.6547 | 0.3453 | 0.3547 | 8329 | 9155 | 2516 | 8572 | 9043 | 2385 | 5.82   | 3.64   |
| 20000 | 1.00 | 0.6500 | 0.3500 | 8450 | 9100  | 2450 | 0.00   | 0.6453 | 0.6547 | 0.3453 | 0.3547 | 8329 | 9155 | 2516 | 8572 | 9043 | 2385 | 3.82   | 3.87   |
| 20000 | 1.01 | 0.6500 | 0.3500 | 8450 | 9191  | 2450 | 0.41   | 0.6453 | 0.6547 | 0.3453 | 0.3547 | 8329 | 9155 | 2516 | 8572 | 9043 | 2385 | 3.63   | 5.93   |
| 20000 | 1.02 | 0.6500 | 0.3500 | 8450 | 9282  | 2450 | 1.64   | 0.6453 | 0.6547 | 0.3453 | 0.3547 | 8329 | 9155 | 2516 | 8572 | 9043 | 2385 | 5.24   | 9.82   |
| 20000 | 1.03 | 0.6500 | 0.3500 | 8450 | 9373  | 2450 | 3.67   | 0.6453 | 0.6547 | 0.3453 | 0.3547 | 8329 | 9155 | 2516 | 8572 | 9043 | 2385 | 8.67   | 15.55  |
| 20000 | 1.04 | 0.6500 | 0.3500 | 8450 | 9464  | 2450 | 6.48   | 0.6453 | 0.6547 | 0.3453 | 0.3547 | 8329 | 9155 | 2516 | 8572 | 9043 | 2385 | 13.90  | 23.10  |
| 20000 | 1.05 | 0.6500 | 0.3500 | 8450 | 9555  | 2450 | 10.08  | 0.6453 | 0.6547 | 0.3453 | 0.3547 | 8329 | 9155 | 2516 | 8572 | 9043 | 2385 | 20.94  | 32.49  |
| 20000 | 1.06 | 0.6500 | 0.3500 | 8450 | 9646  | 2450 | 14.44  | 0.6453 | 0.6547 | 0.3453 | 0.3547 | 8329 | 9155 | 2516 | 8572 | 9043 | 2385 | 29.79  | 43.71  |
| 20000 | 1.07 | 0.6500 | 0.3500 | 8450 | 9737  | 2450 | 19.55  | 0.6453 | 0.6547 | 0.3453 | 0.3547 | 8329 | 9155 | 2516 | 8572 | 9043 | 2385 | 40.46  | 56.76  |
| 20000 | 1.08 | 0.6500 | 0.3500 | 8450 | 9828  | 2450 | 25.40  | 0.6453 | 0.6547 | 0.3453 | 0.3547 | 8329 | 9155 | 2516 | 8572 | 9043 | 2385 | 52.93  | 71.64  |
| 20000 | 1.09 | 0.6500 | 0.3500 | 8450 | 9919  | 2450 | 31.98  | 0.6453 | 0.6547 | 0.3453 | 0.3547 | 8329 | 9155 | 2516 | 8572 | 9043 | 2385 | 67.20  | 88.36  |

|       |      |        |        |      |       |      |        |        |        |        |        |      |      |      |      |      |      |        |        |
|-------|------|--------|--------|------|-------|------|--------|--------|--------|--------|--------|------|------|------|------|------|------|--------|--------|
| 20000 | 1.10 | 0.6500 | 0.3500 | 8450 | 10010 | 2450 | 39.28  | 0.6453 | 0.6547 | 0.3453 | 0.3547 | 8329 | 9155 | 2516 | 8572 | 9043 | 2385 | 83.29  | 106.90 |
| 20000 | 1.11 | 0.6500 | 0.3500 | 8450 | 10101 | 2450 | 47.29  | 0.6453 | 0.6547 | 0.3453 | 0.3547 | 8329 | 9155 | 2516 | 8572 | 9043 | 2385 | 101.19 | 127.28 |
| 20000 | 1.12 | 0.6500 | 0.3500 | 8450 | 10192 | 2450 | 55.99  | 0.6453 | 0.6547 | 0.3453 | 0.3547 | 8329 | 9155 | 2516 | 8572 | 9043 | 2385 | 120.90 | 149.49 |
| 20000 | 1.13 | 0.6500 | 0.3500 | 8450 | 10283 | 2450 | 65.39  | 0.6453 | 0.6547 | 0.3453 | 0.3547 | 8329 | 9155 | 2516 | 8572 | 9043 | 2385 | 142.41 | 173.53 |
| 20000 | 1.14 | 0.6500 | 0.3500 | 8450 | 10374 | 2450 | 75.46  | 0.6453 | 0.6547 | 0.3453 | 0.3547 | 8329 | 9155 | 2516 | 8572 | 9043 | 2385 | 165.74 | 199.40 |
| 20000 | 1.15 | 0.6500 | 0.3500 | 8450 | 10465 | 2450 | 86.19  | 0.6453 | 0.6547 | 0.3453 | 0.3547 | 8329 | 9155 | 2516 | 8572 | 9043 | 2385 | 190.87 | 227.10 |
| 20000 | 1.16 | 0.6500 | 0.3500 | 8450 | 10556 | 2450 | 97.59  | 0.6453 | 0.6547 | 0.3453 | 0.3547 | 8329 | 9155 | 2516 | 8572 | 9043 | 2385 | 217.81 | 256.64 |
| 20000 | 1.17 | 0.6500 | 0.3500 | 8450 | 10647 | 2450 | 109.63 | 0.6453 | 0.6547 | 0.3453 | 0.3547 | 8329 | 9155 | 2516 | 8572 | 9043 | 2385 | 246.56 | 288.00 |
| 20000 | 1.18 | 0.6500 | 0.3500 | 8450 | 10738 | 2450 | 122.31 | 0.6453 | 0.6547 | 0.3453 | 0.3547 | 8329 | 9155 | 2516 | 8572 | 9043 | 2385 | 277.12 | 321.20 |
| 20000 | 1.19 | 0.6500 | 0.3500 | 8450 | 10829 | 2450 | 135.62 | 0.6453 | 0.6547 | 0.3453 | 0.3547 | 8329 | 9155 | 2516 | 8572 | 9043 | 2385 | 309.49 | 356.23 |
| 20000 | 1.20 | 0.6500 | 0.3500 | 8450 | 10920 | 2450 | 149.55 | 0.6453 | 0.6547 | 0.3453 | 0.3547 | 8329 | 9155 | 2516 | 8572 | 9043 | 2385 | 343.67 | 393.09 |
| 20000 | 0.80 | 0.7000 | 0.3000 | 9800 | 6720  | 1800 | 160.22 | 0.6955 | 0.7045 | 0.2955 | 0.3045 | 9675 | 8471 | 1854 | 9926 | 8327 | 1747 | 365.17 | 313.49 |
| 20000 | 0.81 | 0.7000 | 0.3000 | 9800 | 6804  | 1800 | 143.60 | 0.6955 | 0.7045 | 0.2955 | 0.3045 | 9675 | 8471 | 1854 | 9926 | 8327 | 1747 | 331.28 | 281.91 |
| 20000 | 0.82 | 0.7000 | 0.3000 | 9800 | 6888  | 1800 | 128.00 | 0.6955 | 0.7045 | 0.2955 | 0.3045 | 9675 | 8471 | 1854 | 9926 | 8327 | 1747 | 299.05 | 252.02 |
| 20000 | 0.83 | 0.7000 | 0.3000 | 9800 | 6972  | 1800 | 113.40 | 0.6955 | 0.7045 | 0.2955 | 0.3045 | 9675 | 8471 | 1854 | 9926 | 8327 | 1747 | 268.49 | 223.83 |
| 20000 | 0.84 | 0.7000 | 0.3000 | 9800 | 7056  | 1800 | 99.78  | 0.6955 | 0.7045 | 0.2955 | 0.3045 | 9675 | 8471 | 1854 | 9926 | 8327 | 1747 | 239.59 | 197.34 |
| 20000 | 0.85 | 0.7000 | 0.3000 | 9800 | 7140  | 1800 | 87.11  | 0.6955 | 0.7045 | 0.2955 | 0.3045 | 9675 | 8471 | 1854 | 9926 | 8327 | 1747 | 212.36 | 172.54 |
| 20000 | 0.86 | 0.7000 | 0.3000 | 9800 | 7224  | 1800 | 75.39  | 0.6955 | 0.7045 | 0.2955 | 0.3045 | 9675 | 8471 | 1854 | 9926 | 8327 | 1747 | 186.80 | 149.43 |
| 20000 | 0.87 | 0.7000 | 0.3000 | 9800 | 7308  | 1800 | 64.58  | 0.6955 | 0.7045 | 0.2955 | 0.3045 | 9675 | 8471 | 1854 | 9926 | 8327 | 1747 | 162.90 | 128.02 |
| 20000 | 0.88 | 0.7000 | 0.3000 | 9800 | 7392  | 1800 | 54.67  | 0.6955 | 0.7045 | 0.2955 | 0.3045 | 9675 | 8471 | 1854 | 9926 | 8327 | 1747 | 140.66 | 108.30 |
| 20000 | 0.89 | 0.7000 | 0.3000 | 9800 | 7476  | 1800 | 45.64  | 0.6955 | 0.7045 | 0.2955 | 0.3045 | 9675 | 8471 | 1854 | 9926 | 8327 | 1747 | 120.10 | 90.28  |
| 20000 | 0.90 | 0.7000 | 0.3000 | 9800 | 7560  | 1800 | 37.48  | 0.6955 | 0.7045 | 0.2955 | 0.3045 | 9675 | 8471 | 1854 | 9926 | 8327 | 1747 | 101.20 | 73.95  |
| 20000 | 0.91 | 0.7000 | 0.3000 | 9800 | 7644  | 1800 | 30.17  | 0.6955 | 0.7045 | 0.2955 | 0.3045 | 9675 | 8471 | 1854 | 9926 | 8327 | 1747 | 83.96  | 59.32  |
| 20000 | 0.92 | 0.7000 | 0.3000 | 9800 | 7728  | 1800 | 23.69  | 0.6955 | 0.7045 | 0.2955 | 0.3045 | 9675 | 8471 | 1854 | 9926 | 8327 | 1747 | 68.39  | 46.38  |
| 20000 | 0.93 | 0.7000 | 0.3000 | 9800 | 7812  | 1800 | 18.03  | 0.6955 | 0.7045 | 0.2955 | 0.3045 | 9675 | 8471 | 1854 | 9926 | 8327 | 1747 | 54.49  | 35.13  |
| 20000 | 0.94 | 0.7000 | 0.3000 | 9800 | 7896  | 1800 | 13.16  | 0.6955 | 0.7045 | 0.2955 | 0.3045 | 9675 | 8471 | 1854 | 9926 | 8327 | 1747 | 42.25  | 25.58  |
| 20000 | 0.95 | 0.7000 | 0.3000 | 9800 | 7980  | 1800 | 9.09   | 0.6955 | 0.7045 | 0.2955 | 0.3045 | 9675 | 8471 | 1854 | 9926 | 8327 | 1747 | 31.68  | 17.73  |
| 20000 | 0.96 | 0.7000 | 0.3000 | 9800 | 8064  | 1800 | 5.78   | 0.6955 | 0.7045 | 0.2955 | 0.3045 | 9675 | 8471 | 1854 | 9926 | 8327 | 1747 | 22.77  | 11.57  |
| 20000 | 0.97 | 0.7000 | 0.3000 | 9800 | 8148  | 1800 | 3.23   | 0.6955 | 0.7045 | 0.2955 | 0.3045 | 9675 | 8471 | 1854 | 9926 | 8327 | 1747 | 15.53  | 7.10   |
| 20000 | 0.98 | 0.7000 | 0.3000 | 9800 | 8232  | 1800 | 1.43   | 0.6955 | 0.7045 | 0.2955 | 0.3045 | 9675 | 8471 | 1854 | 9926 | 8327 | 1747 | 9.96   | 4.33   |
| 20000 | 0.99 | 0.7000 | 0.3000 | 9800 | 8316  | 1800 | 0.35   | 0.6955 | 0.7045 | 0.2955 | 0.3045 | 9675 | 8471 | 1854 | 9926 | 8327 | 1747 | 6.05   | 3.26   |
| 20000 | 1.00 | 0.7000 | 0.3000 | 9800 | 8400  | 1800 | 0.00   | 0.6955 | 0.7045 | 0.2955 | 0.3045 | 9675 | 8471 | 1854 | 9926 | 8327 | 1747 | 3.81   | 3.88   |
| 20000 | 1.01 | 0.7000 | 0.3000 | 9800 | 8484  | 1800 | 0.35   | 0.6955 | 0.7045 | 0.2955 | 0.3045 | 9675 | 8471 | 1854 | 9926 | 8327 | 1747 | 3.23   | 6.19   |
| 20000 | 1.02 | 0.7000 | 0.3000 | 9800 | 8568  | 1800 | 1.40   | 0.6955 | 0.7045 | 0.2955 | 0.3045 | 9675 | 8471 | 1854 | 9926 | 8327 | 1747 | 4.32   | 10.20  |
| 20000 | 1.03 | 0.7000 | 0.3000 | 9800 | 8652  | 1800 | 3.12   | 0.6955 | 0.7045 | 0.2955 | 0.3045 | 9675 | 8471 | 1854 | 9926 | 8327 | 1747 | 7.08   | 15.90  |

|       |      |        |        |       |       |      |        |        |        |        |        |       |      |      |       |      |      |        |        |
|-------|------|--------|--------|-------|-------|------|--------|--------|--------|--------|--------|-------|------|------|-------|------|------|--------|--------|
| 20000 | 1.04 | 0.7000 | 0.3000 | 9800  | 8736  | 1800 | 5.52   | 0.6955 | 0.7045 | 0.2955 | 0.3045 | 9675  | 8471 | 1854 | 9926  | 8327 | 1747 | 11.50  | 23.30  |
| 20000 | 1.05 | 0.7000 | 0.3000 | 9800  | 8820  | 1800 | 8.57   | 0.6955 | 0.7045 | 0.2955 | 0.3045 | 9675  | 8471 | 1854 | 9926  | 8327 | 1747 | 17.59  | 32.39  |
| 20000 | 1.06 | 0.7000 | 0.3000 | 9800  | 8904  | 1800 | 12.28  | 0.6955 | 0.7045 | 0.2955 | 0.3045 | 9675  | 8471 | 1854 | 9926  | 8327 | 1747 | 25.34  | 43.17  |
| 20000 | 1.07 | 0.7000 | 0.3000 | 9800  | 8988  | 1800 | 16.62  | 0.6955 | 0.7045 | 0.2955 | 0.3045 | 9675  | 8471 | 1854 | 9926  | 8327 | 1747 | 34.76  | 55.66  |
| 20000 | 1.08 | 0.7000 | 0.3000 | 9800  | 9072  | 1800 | 21.59  | 0.6955 | 0.7045 | 0.2955 | 0.3045 | 9675  | 8471 | 1854 | 9926  | 8327 | 1747 | 45.85  | 69.83  |
| 20000 | 1.09 | 0.7000 | 0.3000 | 9800  | 9156  | 1800 | 27.17  | 0.6955 | 0.7045 | 0.2955 | 0.3045 | 9675  | 8471 | 1854 | 9926  | 8327 | 1747 | 58.60  | 85.70  |
| 20000 | 1.10 | 0.7000 | 0.3000 | 9800  | 9240  | 1800 | 33.37  | 0.6955 | 0.7045 | 0.2955 | 0.3045 | 9675  | 8471 | 1854 | 9926  | 8327 | 1747 | 73.01  | 103.27 |
| 20000 | 1.11 | 0.7000 | 0.3000 | 9800  | 9324  | 1800 | 40.16  | 0.6955 | 0.7045 | 0.2955 | 0.3045 | 9675  | 8471 | 1854 | 9926  | 8327 | 1747 | 89.10  | 122.53 |
| 20000 | 1.12 | 0.7000 | 0.3000 | 9800  | 9408  | 1800 | 47.54  | 0.6955 | 0.7045 | 0.2955 | 0.3045 | 9675  | 8471 | 1854 | 9926  | 8327 | 1747 | 106.85 | 143.48 |
| 20000 | 1.13 | 0.7000 | 0.3000 | 9800  | 9492  | 1800 | 55.50  | 0.6955 | 0.7045 | 0.2955 | 0.3045 | 9675  | 8471 | 1854 | 9926  | 8327 | 1747 | 126.26 | 166.13 |
| 20000 | 1.14 | 0.7000 | 0.3000 | 9800  | 9576  | 1800 | 64.04  | 0.6955 | 0.7045 | 0.2955 | 0.3045 | 9675  | 8471 | 1854 | 9926  | 8327 | 1747 | 147.34 | 190.47 |
| 20000 | 1.15 | 0.7000 | 0.3000 | 9800  | 9660  | 1800 | 73.13  | 0.6955 | 0.7045 | 0.2955 | 0.3045 | 9675  | 8471 | 1854 | 9926  | 8327 | 1747 | 170.09 | 216.51 |
| 20000 | 1.16 | 0.7000 | 0.3000 | 9800  | 9744  | 1800 | 82.78  | 0.6955 | 0.7045 | 0.2955 | 0.3045 | 9675  | 8471 | 1854 | 9926  | 8327 | 1747 | 194.50 | 244.25 |
| 20000 | 1.17 | 0.7000 | 0.3000 | 9800  | 9828  | 1800 | 92.98  | 0.6955 | 0.7045 | 0.2955 | 0.3045 | 9675  | 8471 | 1854 | 9926  | 8327 | 1747 | 220.58 | 273.67 |
| 20000 | 1.18 | 0.7000 | 0.3000 | 9800  | 9912  | 1800 | 103.71 | 0.6955 | 0.7045 | 0.2955 | 0.3045 | 9675  | 8471 | 1854 | 9926  | 8327 | 1747 | 248.32 | 304.80 |
| 20000 | 1.19 | 0.7000 | 0.3000 | 9800  | 9996  | 1800 | 114.97 | 0.6955 | 0.7045 | 0.2955 | 0.3045 | 9675  | 8471 | 1854 | 9926  | 8327 | 1747 | 277.73 | 337.61 |
| 20000 | 1.20 | 0.7000 | 0.3000 | 9800  | 10080 | 1800 | 126.76 | 0.6955 | 0.7045 | 0.2955 | 0.3045 | 9675  | 8471 | 1854 | 9926  | 8327 | 1747 | 308.81 | 372.13 |
| 20000 | 0.80 | 0.7500 | 0.2500 | 11250 | 6000  | 1250 | 129.27 | 0.7458 | 0.7542 | 0.2458 | 0.2542 | 11123 | 7584 | 1293 | 11378 | 7414 | 1208 | 333.76 | 272.72 |
| 20000 | 0.81 | 0.7500 | 0.2500 | 11250 | 6075  | 1250 | 115.77 | 0.7458 | 0.7542 | 0.2458 | 0.2542 | 11123 | 7584 | 1293 | 11378 | 7414 | 1208 | 303.17 | 244.86 |
| 20000 | 0.82 | 0.7500 | 0.2500 | 11250 | 6150  | 1250 | 103.12 | 0.7458 | 0.7542 | 0.2458 | 0.2542 | 11123 | 7584 | 1293 | 11378 | 7414 | 1208 | 274.06 | 218.52 |
| 20000 | 0.83 | 0.7500 | 0.2500 | 11250 | 6225  | 1250 | 91.29  | 0.7458 | 0.7542 | 0.2458 | 0.2542 | 11123 | 7584 | 1293 | 11378 | 7414 | 1208 | 246.44 | 193.70 |
| 20000 | 0.84 | 0.7500 | 0.2500 | 11250 | 6300  | 1250 | 80.27  | 0.7458 | 0.7542 | 0.2458 | 0.2542 | 11123 | 7584 | 1293 | 11378 | 7414 | 1208 | 220.30 | 170.40 |
| 20000 | 0.85 | 0.7500 | 0.2500 | 11250 | 6375  | 1250 | 70.03  | 0.7458 | 0.7542 | 0.2458 | 0.2542 | 11123 | 7584 | 1293 | 11378 | 7414 | 1208 | 195.64 | 148.61 |
| 20000 | 0.86 | 0.7500 | 0.2500 | 11250 | 6450  | 1250 | 60.56  | 0.7458 | 0.7542 | 0.2458 | 0.2542 | 11123 | 7584 | 1293 | 11378 | 7414 | 1208 | 172.47 | 128.34 |
| 20000 | 0.87 | 0.7500 | 0.2500 | 11250 | 6525  | 1250 | 51.84  | 0.7458 | 0.7542 | 0.2458 | 0.2542 | 11123 | 7584 | 1293 | 11378 | 7414 | 1208 | 150.78 | 109.59 |
| 20000 | 0.88 | 0.7500 | 0.2500 | 11250 | 6600  | 1250 | 43.86  | 0.7458 | 0.7542 | 0.2458 | 0.2542 | 11123 | 7584 | 1293 | 11378 | 7414 | 1208 | 130.57 | 92.35  |
| 20000 | 0.89 | 0.7500 | 0.2500 | 11250 | 6675  | 1250 | 36.60  | 0.7458 | 0.7542 | 0.2458 | 0.2542 | 11123 | 7584 | 1293 | 11378 | 7414 | 1208 | 111.85 | 76.64  |
| 20000 | 0.90 | 0.7500 | 0.2500 | 11250 | 6750  | 1250 | 30.04  | 0.7458 | 0.7542 | 0.2458 | 0.2542 | 11123 | 7584 | 1293 | 11378 | 7414 | 1208 | 94.61  | 62.44  |
| 20000 | 0.91 | 0.7500 | 0.2500 | 11250 | 6825  | 1250 | 24.16  | 0.7458 | 0.7542 | 0.2458 | 0.2542 | 11123 | 7584 | 1293 | 11378 | 7414 | 1208 | 78.85  | 49.75  |
| 20000 | 0.92 | 0.7500 | 0.2500 | 11250 | 6900  | 1250 | 18.96  | 0.7458 | 0.7542 | 0.2458 | 0.2542 | 11123 | 7584 | 1293 | 11378 | 7414 | 1208 | 64.58  | 38.59  |
| 20000 | 0.93 | 0.7500 | 0.2500 | 11250 | 6975  | 1250 | 14.42  | 0.7458 | 0.7542 | 0.2458 | 0.2542 | 11123 | 7584 | 1293 | 11378 | 7414 | 1208 | 51.79  | 28.94  |
| 20000 | 0.94 | 0.7500 | 0.2500 | 11250 | 7050  | 1250 | 10.52  | 0.7458 | 0.7542 | 0.2458 | 0.2542 | 11123 | 7584 | 1293 | 11378 | 7414 | 1208 | 40.49  | 20.81  |
| 20000 | 0.95 | 0.7500 | 0.2500 | 11250 | 7125  | 1250 | 7.26   | 0.7458 | 0.7542 | 0.2458 | 0.2542 | 11123 | 7584 | 1293 | 11378 | 7414 | 1208 | 30.66  | 14.19  |
| 20000 | 0.96 | 0.7500 | 0.2500 | 11250 | 7200  | 1250 | 4.62   | 0.7458 | 0.7542 | 0.2458 | 0.2542 | 11123 | 7584 | 1293 | 11378 | 7414 | 1208 | 22.32  | 9.10   |
| 20000 | 0.97 | 0.7500 | 0.2500 | 11250 | 7275  | 1250 | 2.58   | 0.7458 | 0.7542 | 0.2458 | 0.2542 | 11123 | 7584 | 1293 | 11378 | 7414 | 1208 | 15.47  | 5.52   |



|       |      |        |        |       |      |      |        |        |        |        |        |       |      |      |       |      |      |        |        |
|-------|------|--------|--------|-------|------|------|--------|--------|--------|--------|--------|-------|------|------|-------|------|------|--------|--------|
| 20000 | 0.98 | 0.7500 | 0.2500 | 11250 | 7350 | 1250 | 1.14   | 0.7458 | 0.7542 | 0.2458 | 0.2542 | 11123 | 7584 | 1293 | 11378 | 7414 | 1208 | 10.09  | 3.46   |
| 20000 | 0.99 | 0.7500 | 0.2500 | 11250 | 7425 | 1250 | 0.28   | 0.7458 | 0.7542 | 0.2458 | 0.2542 | 11123 | 7584 | 1293 | 11378 | 7414 | 1208 | 6.21   | 2.91   |
| 20000 | 1.00 | 0.7500 | 0.2500 | 11250 | 7500 | 1250 | 0.00   | 0.7458 | 0.7542 | 0.2458 | 0.2542 | 11123 | 7584 | 1293 | 11378 | 7414 | 1208 | 3.80   | 3.89   |
| 20000 | 1.01 | 0.7500 | 0.2500 | 11250 | 7575 | 1250 | 0.28   | 0.7458 | 0.7542 | 0.2458 | 0.2542 | 11123 | 7584 | 1293 | 11378 | 7414 | 1208 | 2.88   | 6.38   |
| 20000 | 1.02 | 0.7500 | 0.2500 | 11250 | 7650 | 1250 | 1.11   | 0.7458 | 0.7542 | 0.2458 | 0.2542 | 11123 | 7584 | 1293 | 11378 | 7414 | 1208 | 3.44   | 10.38  |
| 20000 | 1.03 | 0.7500 | 0.2500 | 11250 | 7725 | 1250 | 2.48   | 0.7458 | 0.7542 | 0.2458 | 0.2542 | 11123 | 7584 | 1293 | 11378 | 7414 | 1208 | 5.48   | 15.91  |
| 20000 | 1.04 | 0.7500 | 0.2500 | 11250 | 7800 | 1250 | 4.39   | 0.7458 | 0.7542 | 0.2458 | 0.2542 | 11123 | 7584 | 1293 | 11378 | 7414 | 1208 | 9.01   | 22.95  |
| 20000 | 1.05 | 0.7500 | 0.2500 | 11250 | 7875 | 1250 | 6.82   | 0.7458 | 0.7542 | 0.2458 | 0.2542 | 11123 | 7584 | 1293 | 11378 | 7414 | 1208 | 14.02  | 31.51  |
| 20000 | 1.06 | 0.7500 | 0.2500 | 11250 | 7950 | 1250 | 9.76   | 0.7458 | 0.7542 | 0.2458 | 0.2542 | 11123 | 7584 | 1293 | 11378 | 7414 | 1208 | 20.51  | 41.59  |
| 20000 | 1.07 | 0.7500 | 0.2500 | 11250 | 8025 | 1250 | 13.21  | 0.7458 | 0.7542 | 0.2458 | 0.2542 | 11123 | 7584 | 1293 | 11378 | 7414 | 1208 | 28.49  | 53.18  |
| 20000 | 1.08 | 0.7500 | 0.2500 | 11250 | 8100 | 1250 | 17.15  | 0.7458 | 0.7542 | 0.2458 | 0.2542 | 11123 | 7584 | 1293 | 11378 | 7414 | 1208 | 37.95  | 66.29  |
| 20000 | 1.09 | 0.7500 | 0.2500 | 11250 | 8175 | 1250 | 21.59  | 0.7458 | 0.7542 | 0.2458 | 0.2542 | 11123 | 7584 | 1293 | 11378 | 7414 | 1208 | 48.90  | 80.92  |
| 20000 | 1.10 | 0.7500 | 0.2500 | 11250 | 8250 | 1250 | 26.50  | 0.7458 | 0.7542 | 0.2458 | 0.2542 | 11123 | 7584 | 1293 | 11378 | 7414 | 1208 | 61.32  | 97.07  |
| 20000 | 1.11 | 0.7500 | 0.2500 | 11250 | 8325 | 1250 | 31.88  | 0.7458 | 0.7542 | 0.2458 | 0.2542 | 11123 | 7584 | 1293 | 11378 | 7414 | 1208 | 75.23  | 114.73 |
| 20000 | 1.12 | 0.7500 | 0.2500 | 11250 | 8400 | 1250 | 37.73  | 0.7458 | 0.7542 | 0.2458 | 0.2542 | 11123 | 7584 | 1293 | 11378 | 7414 | 1208 | 90.63  | 133.91 |
| 20000 | 1.13 | 0.7500 | 0.2500 | 11250 | 8475 | 1250 | 44.03  | 0.7458 | 0.7542 | 0.2458 | 0.2542 | 11123 | 7584 | 1293 | 11378 | 7414 | 1208 | 107.51 | 154.61 |
| 20000 | 1.14 | 0.7500 | 0.2500 | 11250 | 8550 | 1250 | 50.78  | 0.7458 | 0.7542 | 0.2458 | 0.2542 | 11123 | 7584 | 1293 | 11378 | 7414 | 1208 | 125.87 | 176.83 |
| 20000 | 1.15 | 0.7500 | 0.2500 | 11250 | 8625 | 1250 | 57.98  | 0.7458 | 0.7542 | 0.2458 | 0.2542 | 11123 | 7584 | 1293 | 11378 | 7414 | 1208 | 145.71 | 200.56 |
| 20000 | 1.16 | 0.7500 | 0.2500 | 11250 | 8700 | 1250 | 65.61  | 0.7458 | 0.7542 | 0.2458 | 0.2542 | 11123 | 7584 | 1293 | 11378 | 7414 | 1208 | 167.04 | 225.81 |
| 20000 | 1.17 | 0.7500 | 0.2500 | 11250 | 8775 | 1250 | 73.67  | 0.7458 | 0.7542 | 0.2458 | 0.2542 | 11123 | 7584 | 1293 | 11378 | 7414 | 1208 | 189.85 | 252.58 |
| 20000 | 1.18 | 0.7500 | 0.2500 | 11250 | 8850 | 1250 | 82.16  | 0.7458 | 0.7542 | 0.2458 | 0.2542 | 11123 | 7584 | 1293 | 11378 | 7414 | 1208 | 214.15 | 280.86 |
| 20000 | 1.19 | 0.7500 | 0.2500 | 11250 | 8925 | 1250 | 91.05  | 0.7458 | 0.7542 | 0.2458 | 0.2542 | 11123 | 7584 | 1293 | 11378 | 7414 | 1208 | 239.92 | 310.66 |
| 20000 | 1.20 | 0.7500 | 0.2500 | 11250 | 9000 | 1250 | 100.36 | 0.7458 | 0.7542 | 0.2458 | 0.2542 | 11123 | 7584 | 1293 | 11378 | 7414 | 1208 | 267.18 | 341.98 |
| 20000 | 0.80 | 0.8000 | 0.2000 | 12800 | 5120 | 800  | 95.51  | 0.7961 | 0.8039 | 0.1961 | 0.2039 | 12675 | 6493 | 832  | 12926 | 6305 | 769  | 292.95 | 225.30 |
| 20000 | 0.81 | 0.8000 | 0.2000 | 12800 | 5184 | 800  | 85.46  | 0.7961 | 0.8039 | 0.1961 | 0.2039 | 12675 | 6493 | 832  | 12926 | 6305 | 769  | 266.51 | 201.88 |
| 20000 | 0.82 | 0.8000 | 0.2000 | 12800 | 5248 | 800  | 76.05  | 0.7961 | 0.8039 | 0.1961 | 0.2039 | 12675 | 6493 | 832  | 12926 | 6305 | 769  | 241.33 | 179.77 |
| 20000 | 0.83 | 0.8000 | 0.2000 | 12800 | 5312 | 800  | 67.27  | 0.7961 | 0.8039 | 0.1961 | 0.2039 | 12675 | 6493 | 832  | 12926 | 6305 | 769  | 217.41 | 158.96 |
| 20000 | 0.84 | 0.8000 | 0.2000 | 12800 | 5376 | 800  | 59.09  | 0.7961 | 0.8039 | 0.1961 | 0.2039 | 12675 | 6493 | 832  | 12926 | 6305 | 769  | 194.75 | 139.44 |
| 20000 | 0.85 | 0.8000 | 0.2000 | 12800 | 5440 | 800  | 51.51  | 0.7961 | 0.8039 | 0.1961 | 0.2039 | 12675 | 6493 | 832  | 12926 | 6305 | 769  | 173.35 | 121.23 |
| 20000 | 0.86 | 0.8000 | 0.2000 | 12800 | 5504 | 800  | 44.51  | 0.7961 | 0.8039 | 0.1961 | 0.2039 | 12675 | 6493 | 832  | 12926 | 6305 | 769  | 153.21 | 104.31 |
| 20000 | 0.87 | 0.8000 | 0.2000 | 12800 | 5568 | 800  | 38.08  | 0.7961 | 0.8039 | 0.1961 | 0.2039 | 12675 | 6493 | 832  | 12926 | 6305 | 769  | 134.34 | 88.69  |
| 20000 | 0.88 | 0.8000 | 0.2000 | 12800 | 5632 | 800  | 32.19  | 0.7961 | 0.8039 | 0.1961 | 0.2039 | 12675 | 6493 | 832  | 12926 | 6305 | 769  | 116.73 | 74.38  |
| 20000 | 0.89 | 0.8000 | 0.2000 | 12800 | 5696 | 800  | 26.84  | 0.7961 | 0.8039 | 0.1961 | 0.2039 | 12675 | 6493 | 832  | 12926 | 6305 | 769  | 100.38 | 61.36  |
| 20000 | 0.90 | 0.8000 | 0.2000 | 12800 | 5760 | 800  | 22.01  | 0.7961 | 0.8039 | 0.1961 | 0.2039 | 12675 | 6493 | 832  | 12926 | 6305 | 769  | 85.29  | 49.64  |
| 20000 | 0.91 | 0.8000 | 0.2000 | 12800 | 5824 | 800  | 17.69  | 0.7961 | 0.8039 | 0.1961 | 0.2039 | 12675 | 6493 | 832  | 12926 | 6305 | 769  | 71.46  | 39.22  |

|       |      |        |        |       |      |     |       |        |        |        |        |       |      |     |       |      |     |        |        |
|-------|------|--------|--------|-------|------|-----|-------|--------|--------|--------|--------|-------|------|-----|-------|------|-----|--------|--------|
| 20000 | 0.92 | 0.8000 | 0.2000 | 12800 | 5888 | 800 | 13.88 | 0.7961 | 0.8039 | 0.1961 | 0.2039 | 12675 | 6493 | 832 | 12926 | 6305 | 769 | 58.90  | 30.10  |
| 20000 | 0.93 | 0.8000 | 0.2000 | 12800 | 5952 | 800 | 10.54 | 0.7961 | 0.8039 | 0.1961 | 0.2039 | 12675 | 6493 | 832 | 12926 | 6305 | 769 | 47.59  | 22.27  |
| 20000 | 0.94 | 0.8000 | 0.2000 | 12800 | 6016 | 800 | 7.69  | 0.7961 | 0.8039 | 0.1961 | 0.2039 | 12675 | 6493 | 832 | 12926 | 6305 | 769 | 37.55  | 15.75  |
| 20000 | 0.95 | 0.8000 | 0.2000 | 12800 | 6080 | 800 | 5.30  | 0.7961 | 0.8039 | 0.1961 | 0.2039 | 12675 | 6493 | 832 | 12926 | 6305 | 769 | 28.77  | 10.53  |
| 20000 | 0.96 | 0.8000 | 0.2000 | 12800 | 6144 | 800 | 3.37  | 0.7961 | 0.8039 | 0.1961 | 0.2039 | 12675 | 6493 | 832 | 12926 | 6305 | 769 | 21.25  | 6.60   |
| 20000 | 0.97 | 0.8000 | 0.2000 | 12800 | 6208 | 800 | 1.88  | 0.7961 | 0.8039 | 0.1961 | 0.2039 | 12675 | 6493 | 832 | 12926 | 6305 | 769 | 14.99  | 3.98   |
| 20000 | 0.98 | 0.8000 | 0.2000 | 12800 | 6272 | 800 | 0.83  | 0.7961 | 0.8039 | 0.1961 | 0.2039 | 12675 | 6493 | 832 | 12926 | 6305 | 769 | 9.99   | 2.65   |
| 20000 | 0.99 | 0.8000 | 0.2000 | 12800 | 6336 | 800 | 0.21  | 0.7961 | 0.8039 | 0.1961 | 0.2039 | 12675 | 6493 | 832 | 12926 | 6305 | 769 | 6.26   | 2.63   |
| 20000 | 1.00 | 0.8000 | 0.2000 | 12800 | 6400 | 800 | 0.00  | 0.7961 | 0.8039 | 0.1961 | 0.2039 | 12675 | 6493 | 832 | 12926 | 6305 | 769 | 3.79   | 3.90   |
| 20000 | 1.01 | 0.8000 | 0.2000 | 12800 | 6464 | 800 | 0.20  | 0.7961 | 0.8039 | 0.1961 | 0.2039 | 12675 | 6493 | 832 | 12926 | 6305 | 769 | 2.57   | 6.47   |
| 20000 | 1.02 | 0.8000 | 0.2000 | 12800 | 6528 | 800 | 0.81  | 0.7961 | 0.8039 | 0.1961 | 0.2039 | 12675 | 6493 | 832 | 12926 | 6305 | 769 | 2.62   | 10.34  |
| 20000 | 1.03 | 0.8000 | 0.2000 | 12800 | 6592 | 800 | 1.81  | 0.7961 | 0.8039 | 0.1961 | 0.2039 | 12675 | 6493 | 832 | 12926 | 6305 | 769 | 3.94   | 15.51  |
| 20000 | 1.04 | 0.8000 | 0.2000 | 12800 | 6656 | 800 | 3.19  | 0.7961 | 0.8039 | 0.1961 | 0.2039 | 12675 | 6493 | 832 | 12926 | 6305 | 769 | 6.51   | 21.98  |
| 20000 | 1.05 | 0.8000 | 0.2000 | 12800 | 6720 | 800 | 4.95  | 0.7961 | 0.8039 | 0.1961 | 0.2039 | 12675 | 6493 | 832 | 12926 | 6305 | 769 | 10.34  | 29.75  |
| 20000 | 1.06 | 0.8000 | 0.2000 | 12800 | 6784 | 800 | 7.09  | 0.7961 | 0.8039 | 0.1961 | 0.2039 | 12675 | 6493 | 832 | 12926 | 6305 | 769 | 15.44  | 38.82  |
| 20000 | 1.07 | 0.8000 | 0.2000 | 12800 | 6848 | 800 | 9.59  | 0.7961 | 0.8039 | 0.1961 | 0.2039 | 12675 | 6493 | 832 | 12926 | 6305 | 769 | 21.80  | 49.19  |
| 20000 | 1.08 | 0.8000 | 0.2000 | 12800 | 6912 | 800 | 12.44 | 0.7961 | 0.8039 | 0.1961 | 0.2039 | 12675 | 6493 | 832 | 12926 | 6305 | 769 | 29.42  | 60.85  |
| 20000 | 1.09 | 0.8000 | 0.2000 | 12800 | 6976 | 800 | 15.65 | 0.7961 | 0.8039 | 0.1961 | 0.2039 | 12675 | 6493 | 832 | 12926 | 6305 | 769 | 38.30  | 73.82  |
| 20000 | 1.10 | 0.8000 | 0.2000 | 12800 | 7040 | 800 | 19.20 | 0.7961 | 0.8039 | 0.1961 | 0.2039 | 12675 | 6493 | 832 | 12926 | 6305 | 769 | 48.44  | 88.08  |
| 20000 | 1.11 | 0.8000 | 0.2000 | 12800 | 7104 | 800 | 23.09 | 0.7961 | 0.8039 | 0.1961 | 0.2039 | 12675 | 6493 | 832 | 12926 | 6305 | 769 | 59.85  | 103.65 |
| 20000 | 1.12 | 0.8000 | 0.2000 | 12800 | 7168 | 800 | 27.32 | 0.7961 | 0.8039 | 0.1961 | 0.2039 | 12675 | 6493 | 832 | 12926 | 6305 | 769 | 72.51  | 120.51 |
| 20000 | 1.13 | 0.8000 | 0.2000 | 12800 | 7232 | 800 | 31.87 | 0.7961 | 0.8039 | 0.1961 | 0.2039 | 12675 | 6493 | 832 | 12926 | 6305 | 769 | 86.44  | 138.67 |
| 20000 | 1.14 | 0.8000 | 0.2000 | 12800 | 7296 | 800 | 36.74 | 0.7961 | 0.8039 | 0.1961 | 0.2039 | 12675 | 6493 | 832 | 12926 | 6305 | 769 | 101.63 | 158.14 |
| 20000 | 1.15 | 0.8000 | 0.2000 | 12800 | 7360 | 800 | 41.94 | 0.7961 | 0.8039 | 0.1961 | 0.2039 | 12675 | 6493 | 832 | 12926 | 6305 | 769 | 118.08 | 178.90 |
| 20000 | 1.16 | 0.8000 | 0.2000 | 12800 | 7424 | 800 | 47.44 | 0.7961 | 0.8039 | 0.1961 | 0.2039 | 12675 | 6493 | 832 | 12926 | 6305 | 769 | 135.79 | 200.96 |
| 20000 | 1.17 | 0.8000 | 0.2000 | 12800 | 7488 | 800 | 53.25 | 0.7961 | 0.8039 | 0.1961 | 0.2039 | 12675 | 6493 | 832 | 12926 | 6305 | 769 | 154.76 | 224.32 |
| 20000 | 1.18 | 0.8000 | 0.2000 | 12800 | 7552 | 800 | 59.36 | 0.7961 | 0.8039 | 0.1961 | 0.2039 | 12675 | 6493 | 832 | 12926 | 6305 | 769 | 175.00 | 248.98 |
| 20000 | 1.19 | 0.8000 | 0.2000 | 12800 | 7616 | 800 | 65.77 | 0.7961 | 0.8039 | 0.1961 | 0.2039 | 12675 | 6493 | 832 | 12926 | 6305 | 769 | 196.50 | 274.93 |
| 20000 | 1.20 | 0.8000 | 0.2000 | 12800 | 7680 | 800 | 72.47 | 0.7961 | 0.8039 | 0.1961 | 0.2039 | 12675 | 6493 | 832 | 12926 | 6305 | 769 | 219.25 | 302.19 |
| 20000 | 0.80 | 0.8500 | 0.1500 | 14450 | 4080 | 450 | 61.69 | 0.8465 | 0.8535 | 0.1465 | 0.1535 | 14331 | 5197 | 471 | 14569 | 5002 | 429 | 242.21 | 171.77 |
| 20000 | 0.81 | 0.8500 | 0.1500 | 14450 | 4131 | 450 | 55.14 | 0.8465 | 0.8535 | 0.1465 | 0.1535 | 14331 | 5197 | 471 | 14569 | 5002 | 429 | 220.78 | 153.50 |
| 20000 | 0.82 | 0.8500 | 0.1500 | 14450 | 4182 | 450 | 49.02 | 0.8465 | 0.8535 | 0.1465 | 0.1535 | 14331 | 5197 | 471 | 14569 | 5002 | 429 | 200.35 | 136.26 |
| 20000 | 0.83 | 0.8500 | 0.1500 | 14450 | 4233 | 450 | 43.31 | 0.8465 | 0.8535 | 0.1465 | 0.1535 | 14331 | 5197 | 471 | 14569 | 5002 | 429 | 180.92 | 120.07 |
| 20000 | 0.84 | 0.8500 | 0.1500 | 14450 | 4284 | 450 | 38.01 | 0.8465 | 0.8535 | 0.1465 | 0.1535 | 14331 | 5197 | 471 | 14569 | 5002 | 429 | 162.49 | 104.92 |
| 20000 | 0.85 | 0.8500 | 0.1500 | 14450 | 4335 | 450 | 33.10 | 0.8465 | 0.8535 | 0.1465 | 0.1535 | 14331 | 5197 | 471 | 14569 | 5002 | 429 | 145.07 | 90.80  |

|       |      |        |        |       |      |     |       |        |        |        |        |       |      |     |       |      |     |        |        |
|-------|------|--------|--------|-------|------|-----|-------|--------|--------|--------|--------|-------|------|-----|-------|------|-----|--------|--------|
| 20000 | 0.86 | 0.8500 | 0.1500 | 14450 | 4386 | 450 | 28.58 | 0.8465 | 0.8535 | 0.1465 | 0.1535 | 14331 | 5197 | 471 | 14569 | 5002 | 429 | 128.64 | 77.73  |
| 20000 | 0.87 | 0.8500 | 0.1500 | 14450 | 4437 | 450 | 24.42 | 0.8465 | 0.8535 | 0.1465 | 0.1535 | 14331 | 5197 | 471 | 14569 | 5002 | 429 | 113.22 | 65.70  |
| 20000 | 0.88 | 0.8500 | 0.1500 | 14450 | 4488 | 450 | 20.63 | 0.8465 | 0.8535 | 0.1465 | 0.1535 | 14331 | 5197 | 471 | 14569 | 5002 | 429 | 98.79  | 54.71  |
| 20000 | 0.89 | 0.8500 | 0.1500 | 14450 | 4539 | 450 | 17.18 | 0.8465 | 0.8535 | 0.1465 | 0.1535 | 14331 | 5197 | 471 | 14569 | 5002 | 429 | 85.37  | 44.75  |
| 20000 | 0.90 | 0.8500 | 0.1500 | 14450 | 4590 | 450 | 14.08 | 0.8465 | 0.8535 | 0.1465 | 0.1535 | 14331 | 5197 | 471 | 14569 | 5002 | 429 | 72.95  | 35.84  |
| 20000 | 0.91 | 0.8500 | 0.1500 | 14450 | 4641 | 450 | 11.31 | 0.8465 | 0.8535 | 0.1465 | 0.1535 | 14331 | 5197 | 471 | 14569 | 5002 | 429 | 61.52  | 27.97  |
| 20000 | 0.92 | 0.8500 | 0.1500 | 14450 | 4692 | 450 | 8.86  | 0.8465 | 0.8535 | 0.1465 | 0.1535 | 14331 | 5197 | 471 | 14569 | 5002 | 429 | 51.10  | 21.13  |
| 20000 | 0.93 | 0.8500 | 0.1500 | 14450 | 4743 | 450 | 6.73  | 0.8465 | 0.8535 | 0.1465 | 0.1535 | 14331 | 5197 | 471 | 14569 | 5002 | 429 | 41.68  | 15.34  |
| 20000 | 0.94 | 0.8500 | 0.1500 | 14450 | 4794 | 450 | 4.90  | 0.8465 | 0.8535 | 0.1465 | 0.1535 | 14331 | 5197 | 471 | 14569 | 5002 | 429 | 33.26  | 10.59  |
| 20000 | 0.95 | 0.8500 | 0.1500 | 14450 | 4845 | 450 | 3.38  | 0.8465 | 0.8535 | 0.1465 | 0.1535 | 14331 | 5197 | 471 | 14569 | 5002 | 429 | 25.85  | 6.88   |
| 20000 | 0.96 | 0.8500 | 0.1500 | 14450 | 4896 | 450 | 2.15  | 0.8465 | 0.8535 | 0.1465 | 0.1535 | 14331 | 5197 | 471 | 14569 | 5002 | 429 | 19.43  | 4.21   |
| 20000 | 0.97 | 0.8500 | 0.1500 | 14450 | 4947 | 450 | 1.20  | 0.8465 | 0.8535 | 0.1465 | 0.1535 | 14331 | 5197 | 471 | 14569 | 5002 | 429 | 14.01  | 2.57   |
| 20000 | 0.98 | 0.8500 | 0.1500 | 14450 | 4998 | 450 | 0.53  | 0.8465 | 0.8535 | 0.1465 | 0.1535 | 14331 | 5197 | 471 | 14569 | 5002 | 429 | 9.60   | 1.98   |
| 20000 | 0.99 | 0.8500 | 0.1500 | 14450 | 5049 | 450 | 0.13  | 0.8465 | 0.8535 | 0.1465 | 0.1535 | 14331 | 5197 | 471 | 14569 | 5002 | 429 | 6.18   | 2.43   |
| 20000 | 1.00 | 0.8500 | 0.1500 | 14450 | 5100 | 450 | 0.00  | 0.8465 | 0.8535 | 0.1465 | 0.1535 | 14331 | 5197 | 471 | 14569 | 5002 | 429 | 3.77   | 3.92   |
| 20000 | 1.01 | 0.8500 | 0.1500 | 14450 | 5151 | 450 | 0.13  | 0.8465 | 0.8535 | 0.1465 | 0.1535 | 14331 | 5197 | 471 | 14569 | 5002 | 429 | 2.36   | 6.45   |
| 20000 | 1.02 | 0.8500 | 0.1500 | 14450 | 5202 | 450 | 0.51  | 0.8465 | 0.8535 | 0.1465 | 0.1535 | 14331 | 5197 | 471 | 14569 | 5002 | 429 | 1.94   | 10.01  |
| 20000 | 1.03 | 0.8500 | 0.1500 | 14450 | 5253 | 450 | 1.15  | 0.8465 | 0.8535 | 0.1465 | 0.1535 | 14331 | 5197 | 471 | 14569 | 5002 | 429 | 2.53   | 14.62  |
| 20000 | 1.04 | 0.8500 | 0.1500 | 14450 | 5304 | 450 | 2.02  | 0.8465 | 0.8535 | 0.1465 | 0.1535 | 14331 | 5197 | 471 | 14569 | 5002 | 429 | 4.12   | 20.27  |
| 20000 | 1.05 | 0.8500 | 0.1500 | 14450 | 5355 | 450 | 3.14  | 0.8465 | 0.8535 | 0.1465 | 0.1535 | 14331 | 5197 | 471 | 14569 | 5002 | 429 | 6.71   | 26.96  |
| 20000 | 1.06 | 0.8500 | 0.1500 | 14450 | 5406 | 450 | 4.48  | 0.8465 | 0.8535 | 0.1465 | 0.1535 | 14331 | 5197 | 471 | 14569 | 5002 | 429 | 10.31  | 34.69  |
| 20000 | 1.07 | 0.8500 | 0.1500 | 14450 | 5457 | 450 | 6.06  | 0.8465 | 0.8535 | 0.1465 | 0.1535 | 14331 | 5197 | 471 | 14569 | 5002 | 429 | 14.90  | 43.46  |
| 20000 | 1.08 | 0.8500 | 0.1500 | 14450 | 5508 | 450 | 7.86  | 0.8465 | 0.8535 | 0.1465 | 0.1535 | 14331 | 5197 | 471 | 14569 | 5002 | 429 | 20.49  | 53.27  |
| 20000 | 1.09 | 0.8500 | 0.1500 | 14450 | 5559 | 450 | 9.89  | 0.8465 | 0.8535 | 0.1465 | 0.1535 | 14331 | 5197 | 471 | 14569 | 5002 | 429 | 27.09  | 64.11  |
| 20000 | 1.10 | 0.8500 | 0.1500 | 14450 | 5610 | 450 | 12.12 | 0.8465 | 0.8535 | 0.1465 | 0.1535 | 14331 | 5197 | 471 | 14569 | 5002 | 429 | 34.68  | 76.00  |
| 20000 | 1.11 | 0.8500 | 0.1500 | 14450 | 5661 | 450 | 14.57 | 0.8465 | 0.8535 | 0.1465 | 0.1535 | 14331 | 5197 | 471 | 14569 | 5002 | 429 | 43.28  | 88.93  |
| 20000 | 1.12 | 0.8500 | 0.1500 | 14450 | 5712 | 450 | 17.23 | 0.8465 | 0.8535 | 0.1465 | 0.1535 | 14331 | 5197 | 471 | 14569 | 5002 | 429 | 52.87  | 102.90 |
| 20000 | 1.13 | 0.8500 | 0.1500 | 14450 | 5763 | 450 | 20.09 | 0.8465 | 0.8535 | 0.1465 | 0.1535 | 14331 | 5197 | 471 | 14569 | 5002 | 429 | 63.47  | 117.91 |
| 20000 | 1.14 | 0.8500 | 0.1500 | 14450 | 5814 | 450 | 23.16 | 0.8465 | 0.8535 | 0.1465 | 0.1535 | 14331 | 5197 | 471 | 14569 | 5002 | 429 | 75.07  | 133.96 |
| 20000 | 1.15 | 0.8500 | 0.1500 | 14450 | 5865 | 450 | 26.42 | 0.8465 | 0.8535 | 0.1465 | 0.1535 | 14331 | 5197 | 471 | 14569 | 5002 | 429 | 87.67  | 151.05 |
| 20000 | 1.16 | 0.8500 | 0.1500 | 14450 | 5916 | 450 | 29.87 | 0.8465 | 0.8535 | 0.1465 | 0.1535 | 14331 | 5197 | 471 | 14569 | 5002 | 429 | 101.27 | 169.18 |
| 20000 | 1.17 | 0.8500 | 0.1500 | 14450 | 5967 | 450 | 33.51 | 0.8465 | 0.8535 | 0.1465 | 0.1535 | 14331 | 5197 | 471 | 14569 | 5002 | 429 | 115.87 | 188.35 |
| 20000 | 1.18 | 0.8500 | 0.1500 | 14450 | 6018 | 450 | 37.34 | 0.8465 | 0.8535 | 0.1465 | 0.1535 | 14331 | 5197 | 471 | 14569 | 5002 | 429 | 131.47 | 208.56 |
| 20000 | 1.19 | 0.8500 | 0.1500 | 14450 | 6069 | 450 | 41.36 | 0.8465 | 0.8535 | 0.1465 | 0.1535 | 14331 | 5197 | 471 | 14569 | 5002 | 429 | 148.07 | 229.81 |
| 20000 | 1.20 | 0.8500 | 0.1500 | 14450 | 6120 | 450 | 45.55 | 0.8465 | 0.8535 | 0.1465 | 0.1535 | 14331 | 5197 | 471 | 14569 | 5002 | 429 | 165.68 | 252.10 |

|       |      |        |        |       |      |     |       |        |        |        |        |       |      |     |       |      |     |        |        |
|-------|------|--------|--------|-------|------|-----|-------|--------|--------|--------|--------|-------|------|-----|-------|------|-----|--------|--------|
| 20000 | 0.80 | 0.9000 | 0.1000 | 16200 | 2880 | 200 | 31.34 | 0.8971 | 0.9029 | 0.0971 | 0.1029 | 16094 | 3694 | 212 | 16306 | 3506 | 188 | 180.63 | 113.04 |
| 20000 | 0.81 | 0.9000 | 0.1000 | 16200 | 2916 | 200 | 27.98 | 0.8971 | 0.9029 | 0.0971 | 0.1029 | 16094 | 3694 | 212 | 16306 | 3506 | 188 | 165.12 | 100.56 |
| 20000 | 0.82 | 0.9000 | 0.1000 | 16200 | 2952 | 200 | 24.84 | 0.8971 | 0.9029 | 0.0971 | 0.1029 | 16094 | 3694 | 212 | 16306 | 3506 | 188 | 150.31 | 88.82  |
| 20000 | 0.83 | 0.9000 | 0.1000 | 16200 | 2988 | 200 | 21.93 | 0.8971 | 0.9029 | 0.0971 | 0.1029 | 16094 | 3694 | 212 | 16306 | 3506 | 188 | 136.21 | 77.82  |
| 20000 | 0.84 | 0.9000 | 0.1000 | 16200 | 3024 | 200 | 19.22 | 0.8971 | 0.9029 | 0.0971 | 0.1029 | 16094 | 3694 | 212 | 16306 | 3506 | 188 | 122.80 | 67.56  |
| 20000 | 0.85 | 0.9000 | 0.1000 | 16200 | 3060 | 200 | 16.72 | 0.8971 | 0.9029 | 0.0971 | 0.1029 | 16094 | 3694 | 212 | 16306 | 3506 | 188 | 110.10 | 58.04  |
| 20000 | 0.86 | 0.9000 | 0.1000 | 16200 | 3096 | 200 | 14.42 | 0.8971 | 0.9029 | 0.0971 | 0.1029 | 16094 | 3694 | 212 | 16306 | 3506 | 188 | 98.09  | 49.25  |
| 20000 | 0.87 | 0.9000 | 0.1000 | 16200 | 3132 | 200 | 12.31 | 0.8971 | 0.9029 | 0.0971 | 0.1029 | 16094 | 3694 | 212 | 16306 | 3506 | 188 | 86.79  | 41.21  |
| 20000 | 0.88 | 0.9000 | 0.1000 | 16200 | 3168 | 200 | 10.39 | 0.8971 | 0.9029 | 0.0971 | 0.1029 | 16094 | 3694 | 212 | 16306 | 3506 | 188 | 76.19  | 33.91  |
| 20000 | 0.89 | 0.9000 | 0.1000 | 16200 | 3204 | 200 | 8.64  | 0.8971 | 0.9029 | 0.0971 | 0.1029 | 16094 | 3694 | 212 | 16306 | 3506 | 188 | 66.30  | 27.35  |
| 20000 | 0.90 | 0.9000 | 0.1000 | 16200 | 3240 | 200 | 7.08  | 0.8971 | 0.9029 | 0.0971 | 0.1029 | 16094 | 3694 | 212 | 16306 | 3506 | 188 | 57.10  | 21.52  |
| 20000 | 0.91 | 0.9000 | 0.1000 | 16200 | 3276 | 200 | 5.68  | 0.8971 | 0.9029 | 0.0971 | 0.1029 | 16094 | 3694 | 212 | 16306 | 3506 | 188 | 48.61  | 16.44  |
| 20000 | 0.92 | 0.9000 | 0.1000 | 16200 | 3312 | 200 | 4.45  | 0.8971 | 0.9029 | 0.0971 | 0.1029 | 16094 | 3694 | 212 | 16306 | 3506 | 188 | 40.82  | 12.09  |
| 20000 | 0.93 | 0.9000 | 0.1000 | 16200 | 3348 | 200 | 3.37  | 0.8971 | 0.9029 | 0.0971 | 0.1029 | 16094 | 3694 | 212 | 16306 | 3506 | 188 | 33.73  | 8.48   |
| 20000 | 0.94 | 0.9000 | 0.1000 | 16200 | 3384 | 200 | 2.46  | 0.8971 | 0.9029 | 0.0971 | 0.1029 | 16094 | 3694 | 212 | 16306 | 3506 | 188 | 27.34  | 5.62   |
| 20000 | 0.95 | 0.9000 | 0.1000 | 16200 | 3420 | 200 | 1.69  | 0.8971 | 0.9029 | 0.0971 | 0.1029 | 16094 | 3694 | 212 | 16306 | 3506 | 188 | 21.65  | 3.49   |
| 20000 | 0.96 | 0.9000 | 0.1000 | 16200 | 3456 | 200 | 1.07  | 0.8971 | 0.9029 | 0.0971 | 0.1029 | 16094 | 3694 | 212 | 16306 | 3506 | 188 | 16.67  | 2.10   |
| 20000 | 0.97 | 0.9000 | 0.1000 | 16200 | 3492 | 200 | 0.60  | 0.8971 | 0.9029 | 0.0971 | 0.1029 | 16094 | 3694 | 212 | 16306 | 3506 | 188 | 12.38  | 1.45   |
| 20000 | 0.98 | 0.9000 | 0.1000 | 16200 | 3528 | 200 | 0.26  | 0.8971 | 0.9029 | 0.0971 | 0.1029 | 16094 | 3694 | 212 | 16306 | 3506 | 188 | 8.80   | 1.55   |
| 20000 | 0.99 | 0.9000 | 0.1000 | 16200 | 3564 | 200 | 0.07  | 0.8971 | 0.9029 | 0.0971 | 0.1029 | 16094 | 3694 | 212 | 16306 | 3506 | 188 | 5.92   | 2.38   |
| 20000 | 1.00 | 0.9000 | 0.1000 | 16200 | 3600 | 200 | 0.00  | 0.8971 | 0.9029 | 0.0971 | 0.1029 | 16094 | 3694 | 212 | 16306 | 3506 | 188 | 3.74   | 3.95   |
| 20000 | 1.01 | 0.9000 | 0.1000 | 16200 | 3636 | 200 | 0.06  | 0.8971 | 0.9029 | 0.0971 | 0.1029 | 16094 | 3694 | 212 | 16306 | 3506 | 188 | 2.27   | 6.25   |
| 20000 | 1.02 | 0.9000 | 0.1000 | 16200 | 3672 | 200 | 0.26  | 0.8971 | 0.9029 | 0.0971 | 0.1029 | 16094 | 3694 | 212 | 16306 | 3506 | 188 | 1.49   | 9.30   |
| 20000 | 1.03 | 0.9000 | 0.1000 | 16200 | 3708 | 200 | 0.57  | 0.8971 | 0.9029 | 0.0971 | 0.1029 | 16094 | 3694 | 212 | 16306 | 3506 | 188 | 1.42   | 13.09  |
| 20000 | 1.04 | 0.9000 | 0.1000 | 16200 | 3744 | 200 | 1.00  | 0.8971 | 0.9029 | 0.0971 | 0.1029 | 16094 | 3694 | 212 | 16306 | 3506 | 188 | 2.05   | 17.62  |
| 20000 | 1.05 | 0.9000 | 0.1000 | 16200 | 3780 | 200 | 1.56  | 0.8971 | 0.9029 | 0.0971 | 0.1029 | 16094 | 3694 | 212 | 16306 | 3506 | 188 | 3.38   | 22.88  |
| 20000 | 1.06 | 0.9000 | 0.1000 | 16200 | 3816 | 200 | 2.23  | 0.8971 | 0.9029 | 0.0971 | 0.1029 | 16094 | 3694 | 212 | 16306 | 3506 | 188 | 5.41   | 28.89  |
| 20000 | 1.07 | 0.9000 | 0.1000 | 16200 | 3852 | 200 | 3.01  | 0.8971 | 0.9029 | 0.0971 | 0.1029 | 16094 | 3694 | 212 | 16306 | 3506 | 188 | 8.15   | 35.64  |
| 20000 | 1.08 | 0.9000 | 0.1000 | 16200 | 3888 | 200 | 3.90  | 0.8971 | 0.9029 | 0.0971 | 0.1029 | 16094 | 3694 | 212 | 16306 | 3506 | 188 | 11.58  | 43.12  |
| 20000 | 1.09 | 0.9000 | 0.1000 | 16200 | 3924 | 200 | 4.90  | 0.8971 | 0.9029 | 0.0971 | 0.1029 | 16094 | 3694 | 212 | 16306 | 3506 | 188 | 15.72  | 51.35  |
| 20000 | 1.10 | 0.9000 | 0.1000 | 16200 | 3960 | 200 | 6.00  | 0.8971 | 0.9029 | 0.0971 | 0.1029 | 16094 | 3694 | 212 | 16306 | 3506 | 188 | 20.56  | 60.31  |
| 20000 | 1.11 | 0.9000 | 0.1000 | 16200 | 3996 | 200 | 7.21  | 0.8971 | 0.9029 | 0.0971 | 0.1029 | 16094 | 3694 | 212 | 16306 | 3506 | 188 | 26.10  | 70.01  |
| 20000 | 1.12 | 0.9000 | 0.1000 | 16200 | 4032 | 200 | 8.52  | 0.8971 | 0.9029 | 0.0971 | 0.1029 | 16094 | 3694 | 212 | 16306 | 3506 | 188 | 32.34  | 80.45  |
| 20000 | 1.13 | 0.9000 | 0.1000 | 16200 | 4068 | 200 | 9.93  | 0.8971 | 0.9029 | 0.0971 | 0.1029 | 16094 | 3694 | 212 | 16306 | 3506 | 188 | 39.29  | 91.64  |
| 20000 | 1.14 | 0.9000 | 0.1000 | 16200 | 4104 | 200 | 11.44 | 0.8971 | 0.9029 | 0.0971 | 0.1029 | 16094 | 3694 | 212 | 16306 | 3506 | 188 | 46.93  | 103.56 |

|       |      |        |        |       |      |     |       |        |        |        |        |       |      |     |       |      |     |        |        |
|-------|------|--------|--------|-------|------|-----|-------|--------|--------|--------|--------|-------|------|-----|-------|------|-----|--------|--------|
| 20000 | 1.15 | 0.9000 | 0.1000 | 16200 | 4140 | 200 | 13.04 | 0.8971 | 0.9029 | 0.0971 | 0.1029 | 16094 | 3694 | 212 | 16306 | 3506 | 188 | 55.28  | 116.22 |
| 20000 | 1.16 | 0.9000 | 0.1000 | 16200 | 4176 | 200 | 14.74 | 0.8971 | 0.9029 | 0.0971 | 0.1029 | 16094 | 3694 | 212 | 16306 | 3506 | 188 | 64.33  | 129.62 |
| 20000 | 1.17 | 0.9000 | 0.1000 | 16200 | 4212 | 200 | 16.52 | 0.8971 | 0.9029 | 0.0971 | 0.1029 | 16094 | 3694 | 212 | 16306 | 3506 | 188 | 74.08  | 143.76 |
| 20000 | 1.18 | 0.9000 | 0.1000 | 16200 | 4248 | 200 | 18.40 | 0.8971 | 0.9029 | 0.0971 | 0.1029 | 16094 | 3694 | 212 | 16306 | 3506 | 188 | 84.54  | 158.64 |
| 20000 | 1.19 | 0.9000 | 0.1000 | 16200 | 4284 | 200 | 20.37 | 0.8971 | 0.9029 | 0.0971 | 0.1029 | 16094 | 3694 | 212 | 16306 | 3506 | 188 | 95.69  | 174.25 |
| 20000 | 1.20 | 0.9000 | 0.1000 | 16200 | 4320 | 200 | 22.43 | 0.8971 | 0.9029 | 0.0971 | 0.1029 | 16094 | 3694 | 212 | 16306 | 3506 | 188 | 107.55 | 190.61 |
| 20000 | 0.80 | 0.9500 | 0.0500 | 18050 | 1520 | 50  | 8.92  | 0.9479 | 0.9521 | 0.0479 | 0.0521 | 17969 | 1977 | 54  | 18131 | 1823 | 46  | 106.24 | 51.08  |
| 20000 | 0.81 | 0.9500 | 0.0500 | 18050 | 1539 | 50  | 7.95  | 0.9479 | 0.9521 | 0.0479 | 0.0521 | 17969 | 1977 | 54  | 18131 | 1823 | 46  | 97.64  | 44.97  |
| 20000 | 0.82 | 0.9500 | 0.0500 | 18050 | 1558 | 50  | 7.05  | 0.9479 | 0.9521 | 0.0479 | 0.0521 | 17969 | 1977 | 54  | 18131 | 1823 | 46  | 89.41  | 39.25  |
| 20000 | 0.83 | 0.9500 | 0.0500 | 18050 | 1577 | 50  | 6.22  | 0.9479 | 0.9521 | 0.0479 | 0.0521 | 17969 | 1977 | 54  | 18131 | 1823 | 46  | 81.54  | 33.92  |
| 20000 | 0.84 | 0.9500 | 0.0500 | 18050 | 1596 | 50  | 5.44  | 0.9479 | 0.9521 | 0.0479 | 0.0521 | 17969 | 1977 | 54  | 18131 | 1823 | 46  | 74.04  | 28.99  |
| 20000 | 0.85 | 0.9500 | 0.0500 | 18050 | 1615 | 50  | 4.73  | 0.9479 | 0.9521 | 0.0479 | 0.0521 | 17969 | 1977 | 54  | 18131 | 1823 | 46  | 66.90  | 24.46  |
| 20000 | 0.86 | 0.9500 | 0.0500 | 18050 | 1634 | 50  | 4.07  | 0.9479 | 0.9521 | 0.0479 | 0.0521 | 17969 | 1977 | 54  | 18131 | 1823 | 46  | 60.13  | 20.33  |
| 20000 | 0.87 | 0.9500 | 0.0500 | 18050 | 1653 | 50  | 3.47  | 0.9479 | 0.9521 | 0.0479 | 0.0521 | 17969 | 1977 | 54  | 18131 | 1823 | 46  | 53.73  | 16.59  |
| 20000 | 0.88 | 0.9500 | 0.0500 | 18050 | 1672 | 50  | 2.93  | 0.9479 | 0.9521 | 0.0479 | 0.0521 | 17969 | 1977 | 54  | 18131 | 1823 | 46  | 47.69  | 13.24  |
| 20000 | 0.89 | 0.9500 | 0.0500 | 18050 | 1691 | 50  | 2.43  | 0.9479 | 0.9521 | 0.0479 | 0.0521 | 17969 | 1977 | 54  | 18131 | 1823 | 46  | 42.01  | 10.29  |
| 20000 | 0.90 | 0.9500 | 0.0500 | 18050 | 1710 | 50  | 1.99  | 0.9479 | 0.9521 | 0.0479 | 0.0521 | 17969 | 1977 | 54  | 18131 | 1823 | 46  | 36.70  | 7.74   |
| 20000 | 0.91 | 0.9500 | 0.0500 | 18050 | 1729 | 50  | 1.60  | 0.9479 | 0.9521 | 0.0479 | 0.0521 | 17969 | 1977 | 54  | 18131 | 1823 | 46  | 31.76  | 5.59   |
| 20000 | 0.92 | 0.9500 | 0.0500 | 18050 | 1748 | 50  | 1.25  | 0.9479 | 0.9521 | 0.0479 | 0.0521 | 17969 | 1977 | 54  | 18131 | 1823 | 46  | 27.18  | 3.83   |
| 20000 | 0.93 | 0.9500 | 0.0500 | 18050 | 1767 | 50  | 0.95  | 0.9479 | 0.9521 | 0.0479 | 0.0521 | 17969 | 1977 | 54  | 18131 | 1823 | 46  | 22.96  | 2.46   |
| 20000 | 0.94 | 0.9500 | 0.0500 | 18050 | 1786 | 50  | 0.69  | 0.9479 | 0.9521 | 0.0479 | 0.0521 | 17969 | 1977 | 54  | 18131 | 1823 | 46  | 19.12  | 1.49   |
| 20000 | 0.95 | 0.9500 | 0.0500 | 18050 | 1805 | 50  | 0.47  | 0.9479 | 0.9521 | 0.0479 | 0.0521 | 17969 | 1977 | 54  | 18131 | 1823 | 46  | 15.63  | .92    |
| 20000 | 0.96 | 0.9500 | 0.0500 | 18050 | 1824 | 50  | 0.30  | 0.9479 | 0.9521 | 0.0479 | 0.0521 | 17969 | 1977 | 54  | 18131 | 1823 | 46  | 12.51  | .75    |
| 20000 | 0.97 | 0.9500 | 0.0500 | 18050 | 1843 | 50  | 0.17  | 0.9479 | 0.9521 | 0.0479 | 0.0521 | 17969 | 1977 | 54  | 18131 | 1823 | 46  | 9.76   | .97    |
| 20000 | 0.98 | 0.9500 | 0.0500 | 18050 | 1862 | 50  | 0.07  | 0.9479 | 0.9521 | 0.0479 | 0.0521 | 17969 | 1977 | 54  | 18131 | 1823 | 46  | 7.37   | 1.58   |
| 20000 | 0.99 | 0.9500 | 0.0500 | 18050 | 1881 | 50  | 0.02  | 0.9479 | 0.9521 | 0.0479 | 0.0521 | 17969 | 1977 | 54  | 18131 | 1823 | 46  | 5.35   | 2.60   |
| 20000 | 1.00 | 0.9500 | 0.0500 | 18050 | 1900 | 50  | 0.00  | 0.9479 | 0.9521 | 0.0479 | 0.0521 | 17969 | 1977 | 54  | 18131 | 1823 | 46  | 3.69   | 4.00   |
| 20000 | 1.01 | 0.9500 | 0.0500 | 18050 | 1919 | 50  | 0.02  | 0.9479 | 0.9521 | 0.0479 | 0.0521 | 17969 | 1977 | 54  | 18131 | 1823 | 46  | 2.40   | 5.81   |
| 20000 | 1.02 | 0.9500 | 0.0500 | 18050 | 1938 | 50  | 0.07  | 0.9479 | 0.9521 | 0.0479 | 0.0521 | 17969 | 1977 | 54  | 18131 | 1823 | 46  | 1.47   | 8.01   |
| 20000 | 1.03 | 0.9500 | 0.0500 | 18050 | 1957 | 50  | 0.16  | 0.9479 | 0.9521 | 0.0479 | 0.0521 | 17969 | 1977 | 54  | 18131 | 1823 | 46  | .91    | 10.61  |
| 20000 | 1.04 | 0.9500 | 0.0500 | 18050 | 1976 | 50  | 0.28  | 0.9479 | 0.9521 | 0.0479 | 0.0521 | 17969 | 1977 | 54  | 18131 | 1823 | 46  | .72    | 13.60  |
| 20000 | 1.05 | 0.9500 | 0.0500 | 18050 | 1995 | 50  | 0.43  | 0.9479 | 0.9521 | 0.0479 | 0.0521 | 17969 | 1977 | 54  | 18131 | 1823 | 46  | .89    | 16.99  |
| 20000 | 1.06 | 0.9500 | 0.0500 | 18050 | 2014 | 50  | 0.62  | 0.9479 | 0.9521 | 0.0479 | 0.0521 | 17969 | 1977 | 54  | 18131 | 1823 | 46  | 1.42   | 20.77  |
| 20000 | 1.07 | 0.9500 | 0.0500 | 18050 | 2033 | 50  | 0.83  | 0.9479 | 0.9521 | 0.0479 | 0.0521 | 17969 | 1977 | 54  | 18131 | 1823 | 46  | 2.32   | 24.95  |
| 20000 | 1.08 | 0.9500 | 0.0500 | 18050 | 2052 | 50  | 1.08  | 0.9479 | 0.9521 | 0.0479 | 0.0521 | 17969 | 1977 | 54  | 18131 | 1823 | 46  | 3.58   | 29.53  |

|       |      |        |        |       |      |    |      |        |        |        |        |       |      |    |       |      |    |       |        |
|-------|------|--------|--------|-------|------|----|------|--------|--------|--------|--------|-------|------|----|-------|------|----|-------|--------|
| 20000 | 1.09 | 0.9500 | 0.0500 | 18050 | 2071 | 50 | 1.35 | 0.9479 | 0.9521 | 0.0479 | 0.0521 | 17969 | 1977 | 54 | 18131 | 1823 | 46 | 5.21  | 34.50  |
| 20000 | 1.10 | 0.9500 | 0.0500 | 18050 | 2090 | 50 | 1.66 | 0.9479 | 0.9521 | 0.0479 | 0.0521 | 17969 | 1977 | 54 | 18131 | 1823 | 46 | 7.21  | 39.87  |
| 20000 | 1.11 | 0.9500 | 0.0500 | 18050 | 2109 | 50 | 1.99 | 0.9479 | 0.9521 | 0.0479 | 0.0521 | 17969 | 1977 | 54 | 18131 | 1823 | 46 | 9.57  | 45.64  |
| 20000 | 1.12 | 0.9500 | 0.0500 | 18050 | 2128 | 50 | 2.35 | 0.9479 | 0.9521 | 0.0479 | 0.0521 | 17969 | 1977 | 54 | 18131 | 1823 | 46 | 12.30 | 51.80  |
| 20000 | 1.13 | 0.9500 | 0.0500 | 18050 | 2147 | 50 | 2.74 | 0.9479 | 0.9521 | 0.0479 | 0.0521 | 17969 | 1977 | 54 | 18131 | 1823 | 46 | 15.39 | 58.36  |
| 20000 | 1.14 | 0.9500 | 0.0500 | 18050 | 2166 | 50 | 3.15 | 0.9479 | 0.9521 | 0.0479 | 0.0521 | 17969 | 1977 | 54 | 18131 | 1823 | 46 | 18.84 | 65.31  |
| 20000 | 1.15 | 0.9500 | 0.0500 | 18050 | 2185 | 50 | 3.59 | 0.9479 | 0.9521 | 0.0479 | 0.0521 | 17969 | 1977 | 54 | 18131 | 1823 | 46 | 22.66 | 72.66  |
| 20000 | 1.16 | 0.9500 | 0.0500 | 18050 | 2204 | 50 | 4.06 | 0.9479 | 0.9521 | 0.0479 | 0.0521 | 17969 | 1977 | 54 | 18131 | 1823 | 46 | 26.85 | 80.41  |
| 20000 | 1.17 | 0.9500 | 0.0500 | 18050 | 2223 | 50 | 4.55 | 0.9479 | 0.9521 | 0.0479 | 0.0521 | 17969 | 1977 | 54 | 18131 | 1823 | 46 | 31.40 | 88.55  |
| 20000 | 1.18 | 0.9500 | 0.0500 | 18050 | 2242 | 50 | 5.06 | 0.9479 | 0.9521 | 0.0479 | 0.0521 | 17969 | 1977 | 54 | 18131 | 1823 | 46 | 36.32 | 97.09  |
| 20000 | 1.19 | 0.9500 | 0.0500 | 18050 | 2261 | 50 | 5.60 | 0.9479 | 0.9521 | 0.0479 | 0.0521 | 17969 | 1977 | 54 | 18131 | 1823 | 46 | 41.60 | 106.02 |
| 20000 | 1.20 | 0.9500 | 0.0500 | 18050 | 2280 | 50 | 6.16 | 0.9479 | 0.9521 | 0.0479 | 0.0521 | 17969 | 1977 | 54 | 18131 | 1823 | 46 | 47.25 | 115.35 |
| 20000 | 0.80 | 1.0000 | 0.0000 | 20000 | 0    | 0  | 6.16 | 1.0000 | 1.0000 | 0.0000 | 0.0000 | 20000 | 0    | 0  | 20000 | 0    | 0  | .     | .      |
| 20000 | 0.81 | 1.0000 | 0.0000 | 20000 | 0    | 0  | 6.16 | 1.0000 | 1.0000 | 0.0000 | 0.0000 | 20000 | 0    | 0  | 20000 | 0    | 0  | .     | .      |
| 20000 | 0.82 | 1.0000 | 0.0000 | 20000 | 0    | 0  | 6.16 | 1.0000 | 1.0000 | 0.0000 | 0.0000 | 20000 | 0    | 0  | 20000 | 0    | 0  | .     | .      |
| 20000 | 0.83 | 1.0000 | 0.0000 | 20000 | 0    | 0  | 6.16 | 1.0000 | 1.0000 | 0.0000 | 0.0000 | 20000 | 0    | 0  | 20000 | 0    | 0  | .     | .      |
| 20000 | 0.84 | 1.0000 | 0.0000 | 20000 | 0    | 0  | 6.16 | 1.0000 | 1.0000 | 0.0000 | 0.0000 | 20000 | 0    | 0  | 20000 | 0    | 0  | .     | .      |
| 20000 | 0.85 | 1.0000 | 0.0000 | 20000 | 0    | 0  | 6.16 | 1.0000 | 1.0000 | 0.0000 | 0.0000 | 20000 | 0    | 0  | 20000 | 0    | 0  | .     | .      |
| 20000 | 0.86 | 1.0000 | 0.0000 | 20000 | 0    | 0  | 6.16 | 1.0000 | 1.0000 | 0.0000 | 0.0000 | 20000 | 0    | 0  | 20000 | 0    | 0  | .     | .      |
| 20000 | 0.87 | 1.0000 | 0.0000 | 20000 | 0    | 0  | 6.16 | 1.0000 | 1.0000 | 0.0000 | 0.0000 | 20000 | 0    | 0  | 20000 | 0    | 0  | .     | .      |
| 20000 | 0.88 | 1.0000 | 0.0000 | 20000 | 0    | 0  | 6.16 | 1.0000 | 1.0000 | 0.0000 | 0.0000 | 20000 | 0    | 0  | 20000 | 0    | 0  | .     | .      |
| 20000 | 0.89 | 1.0000 | 0.0000 | 20000 | 0    | 0  | 6.16 | 1.0000 | 1.0000 | 0.0000 | 0.0000 | 20000 | 0    | 0  | 20000 | 0    | 0  | .     | .      |
| 20000 | 0.90 | 1.0000 | 0.0000 | 20000 | 0    | 0  | 6.16 | 1.0000 | 1.0000 | 0.0000 | 0.0000 | 20000 | 0    | 0  | 20000 | 0    | 0  | .     | .      |
| 20000 | 0.91 | 1.0000 | 0.0000 | 20000 | 0    | 0  | 6.16 | 1.0000 | 1.0000 | 0.0000 | 0.0000 | 20000 | 0    | 0  | 20000 | 0    | 0  | .     | .      |
| 20000 | 0.92 | 1.0000 | 0.0000 | 20000 | 0    | 0  | 6.16 | 1.0000 | 1.0000 | 0.0000 | 0.0000 | 20000 | 0    | 0  | 20000 | 0    | 0  | .     | .      |
| 20000 | 0.93 | 1.0000 | 0.0000 | 20000 | 0    | 0  | 6.16 | 1.0000 | 1.0000 | 0.0000 | 0.0000 | 20000 | 0    | 0  | 20000 | 0    | 0  | .     | .      |
| 20000 | 0.94 | 1.0000 | 0.0000 | 20000 | 0    | 0  | 6.16 | 1.0000 | 1.0000 | 0.0000 | 0.0000 | 20000 | 0    | 0  | 20000 | 0    | 0  | .     | .      |
| 20000 | 0.95 | 1.0000 | 0.0000 | 20000 | 0    | 0  | 6.16 | 1.0000 | 1.0000 | 0.0000 | 0.0000 | 20000 | 0    | 0  | 20000 | 0    | 0  | .     | .      |
| 20000 | 0.96 | 1.0000 | 0.0000 | 20000 | 0    | 0  | 6.16 | 1.0000 | 1.0000 | 0.0000 | 0.0000 | 20000 | 0    | 0  | 20000 | 0    | 0  | .     | .      |
| 20000 | 0.97 | 1.0000 | 0.0000 | 20000 | 0    | 0  | 6.16 | 1.0000 | 1.0000 | 0.0000 | 0.0000 | 20000 | 0    | 0  | 20000 | 0    | 0  | .     | .      |
| 20000 | 0.98 | 1.0000 | 0.0000 | 20000 | 0    | 0  | 6.16 | 1.0000 | 1.0000 | 0.0000 | 0.0000 | 20000 | 0    | 0  | 20000 | 0    | 0  | .     | .      |
| 20000 | 0.99 | 1.0000 | 0.0000 | 20000 | 0    | 0  | 6.16 | 1.0000 | 1.0000 | 0.0000 | 0.0000 | 20000 | 0    | 0  | 20000 | 0    | 0  | .     | .      |
| 20000 | 1.00 | 1.0000 | 0.0000 | 20000 | 0    | 0  | 6.16 | 1.0000 | 1.0000 | 0.0000 | 0.0000 | 20000 | 0    | 0  | 20000 | 0    | 0  | .     | .      |
| 20000 | 1.01 | 1.0000 | 0.0000 | 20000 | 0    | 0  | 6.16 | 1.0000 | 1.0000 | 0.0000 | 0.0000 | 20000 | 0    | 0  | 20000 | 0    | 0  | .     | .      |
| 20000 | 1.02 | 1.0000 | 0.0000 | 20000 | 0    | 0  | 6.16 | 1.0000 | 1.0000 | 0.0000 | 0.0000 | 20000 | 0    | 0  | 20000 | 0    | 0  | .     | .      |

|       |      |        |        |       |      |       |       |        |        |        |        |       |      |       |       |      |       |        |        |
|-------|------|--------|--------|-------|------|-------|-------|--------|--------|--------|--------|-------|------|-------|-------|------|-------|--------|--------|
| 20000 | 1.03 | 1.0000 | 0.0000 | 20000 | 0    | 0     | 6.16  | 1.0000 | 1.0000 | 0.0000 | 0.0000 | 20000 | 0    | 0     | 20000 | 0    | 0     | .      | .      |
| 20000 | 1.04 | 1.0000 | 0.0000 | 20000 | 0    | 0     | 6.16  | 1.0000 | 1.0000 | 0.0000 | 0.0000 | 20000 | 0    | 0     | 20000 | 0    | 0     | .      | .      |
| 20000 | 1.05 | 1.0000 | 0.0000 | 20000 | 0    | 0     | 6.16  | 1.0000 | 1.0000 | 0.0000 | 0.0000 | 20000 | 0    | 0     | 20000 | 0    | 0     | .      | .      |
| 20000 | 1.06 | 1.0000 | 0.0000 | 20000 | 0    | 0     | 6.16  | 1.0000 | 1.0000 | 0.0000 | 0.0000 | 20000 | 0    | 0     | 20000 | 0    | 0     | .      | .      |
| 20000 | 1.07 | 1.0000 | 0.0000 | 20000 | 0    | 0     | 6.16  | 1.0000 | 1.0000 | 0.0000 | 0.0000 | 20000 | 0    | 0     | 20000 | 0    | 0     | .      | .      |
| 20000 | 1.08 | 1.0000 | 0.0000 | 20000 | 0    | 0     | 6.16  | 1.0000 | 1.0000 | 0.0000 | 0.0000 | 20000 | 0    | 0     | 20000 | 0    | 0     | .      | .      |
| 20000 | 1.09 | 1.0000 | 0.0000 | 20000 | 0    | 0     | 6.16  | 1.0000 | 1.0000 | 0.0000 | 0.0000 | 20000 | 0    | 0     | 20000 | 0    | 0     | .      | .      |
| 20000 | 1.10 | 1.0000 | 0.0000 | 20000 | 0    | 0     | 6.16  | 1.0000 | 1.0000 | 0.0000 | 0.0000 | 20000 | 0    | 0     | 20000 | 0    | 0     | .      | .      |
| 20000 | 1.11 | 1.0000 | 0.0000 | 20000 | 0    | 0     | 6.16  | 1.0000 | 1.0000 | 0.0000 | 0.0000 | 20000 | 0    | 0     | 20000 | 0    | 0     | .      | .      |
| 20000 | 1.12 | 1.0000 | 0.0000 | 20000 | 0    | 0     | 6.16  | 1.0000 | 1.0000 | 0.0000 | 0.0000 | 20000 | 0    | 0     | 20000 | 0    | 0     | .      | .      |
| 20000 | 1.13 | 1.0000 | 0.0000 | 20000 | 0    | 0     | 6.16  | 1.0000 | 1.0000 | 0.0000 | 0.0000 | 20000 | 0    | 0     | 20000 | 0    | 0     | .      | .      |
| 20000 | 1.14 | 1.0000 | 0.0000 | 20000 | 0    | 0     | 6.16  | 1.0000 | 1.0000 | 0.0000 | 0.0000 | 20000 | 0    | 0     | 20000 | 0    | 0     | .      | .      |
| 20000 | 1.15 | 1.0000 | 0.0000 | 20000 | 0    | 0     | 6.16  | 1.0000 | 1.0000 | 0.0000 | 0.0000 | 20000 | 0    | 0     | 20000 | 0    | 0     | .      | .      |
| 20000 | 1.16 | 1.0000 | 0.0000 | 20000 | 0    | 0     | 6.16  | 1.0000 | 1.0000 | 0.0000 | 0.0000 | 20000 | 0    | 0     | 20000 | 0    | 0     | .      | .      |
| 20000 | 1.17 | 1.0000 | 0.0000 | 20000 | 0    | 0     | 6.16  | 1.0000 | 1.0000 | 0.0000 | 0.0000 | 20000 | 0    | 0     | 20000 | 0    | 0     | .      | .      |
| 20000 | 1.18 | 1.0000 | 0.0000 | 20000 | 0    | 0     | 6.16  | 1.0000 | 1.0000 | 0.0000 | 0.0000 | 20000 | 0    | 0     | 20000 | 0    | 0     | .      | .      |
| 20000 | 1.19 | 1.0000 | 0.0000 | 20000 | 0    | 0     | 6.16  | 1.0000 | 1.0000 | 0.0000 | 0.0000 | 20000 | 0    | 0     | 20000 | 0    | 0     | .      | .      |
| 20000 | 1.20 | 1.0000 | 0.0000 | 20000 | 0    | 0     | 6.16  | 1.0000 | 1.0000 | 0.0000 | 0.0000 | 20000 | 0    | 0     | 20000 | 0    | 0     | .      | .      |
| 50000 | 0.80 | 0.0500 | 0.9500 | 125   | 3800 | 45125 | 22.30 | 0.0486 | 0.0514 | 0.9486 | 0.9514 | 118   | 4628 | 45253 | 132   | 4871 | 44997 | 148.96 | 236.36 |
| 50000 | 0.81 | 0.0500 | 0.9500 | 125   | 3848 | 45125 | 19.88 | 0.0486 | 0.0514 | 0.9486 | 0.9514 | 118   | 4628 | 45253 | 132   | 4871 | 44997 | 132.44 | 215.93 |
| 50000 | 0.82 | 0.0500 | 0.9500 | 125   | 3895 | 45125 | 17.63 | 0.0486 | 0.0514 | 0.9486 | 0.9514 | 118   | 4628 | 45253 | 132   | 4871 | 44997 | 116.91 | 196.42 |
| 50000 | 0.83 | 0.0500 | 0.9500 | 125   | 3943 | 45125 | 15.54 | 0.0486 | 0.0514 | 0.9486 | 0.9514 | 118   | 4628 | 45253 | 132   | 4871 | 44997 | 102.34 | 177.85 |
| 50000 | 0.84 | 0.0500 | 0.9500 | 125   | 3990 | 45125 | 13.61 | 0.0486 | 0.0514 | 0.9486 | 0.9514 | 118   | 4628 | 45253 | 132   | 4871 | 44997 | 88.75  | 160.19 |
| 50000 | 0.85 | 0.0500 | 0.9500 | 125   | 4038 | 45125 | 11.82 | 0.0486 | 0.0514 | 0.9486 | 0.9514 | 118   | 4628 | 45253 | 132   | 4871 | 44997 | 76.14  | 143.47 |
| 50000 | 0.86 | 0.0500 | 0.9500 | 125   | 4085 | 45125 | 10.18 | 0.0486 | 0.0514 | 0.9486 | 0.9514 | 118   | 4628 | 45253 | 132   | 4871 | 44997 | 64.50  | 127.67 |
| 50000 | 0.87 | 0.0500 | 0.9500 | 125   | 4133 | 45125 | 8.68  | 0.0486 | 0.0514 | 0.9486 | 0.9514 | 118   | 4628 | 45253 | 132   | 4871 | 44997 | 53.84  | 112.80 |
| 50000 | 0.88 | 0.0500 | 0.9500 | 125   | 4180 | 45125 | 7.32  | 0.0486 | 0.0514 | 0.9486 | 0.9514 | 118   | 4628 | 45253 | 132   | 4871 | 44997 | 44.15  | 98.85  |
| 50000 | 0.89 | 0.0500 | 0.9500 | 125   | 4228 | 45125 | 6.08  | 0.0486 | 0.0514 | 0.9486 | 0.9514 | 118   | 4628 | 45253 | 132   | 4871 | 44997 | 35.44  | 85.83  |
| 50000 | 0.90 | 0.0500 | 0.9500 | 125   | 4275 | 45125 | 4.97  | 0.0486 | 0.0514 | 0.9486 | 0.9514 | 118   | 4628 | 45253 | 132   | 4871 | 44997 | 27.70  | 73.74  |
| 50000 | 0.91 | 0.0500 | 0.9500 | 125   | 4323 | 45125 | 3.99  | 0.0486 | 0.0514 | 0.9486 | 0.9514 | 118   | 4628 | 45253 | 132   | 4871 | 44997 | 20.94  | 62.57  |
| 50000 | 0.92 | 0.0500 | 0.9500 | 125   | 4370 | 45125 | 3.12  | 0.0486 | 0.0514 | 0.9486 | 0.9514 | 118   | 4628 | 45253 | 132   | 4871 | 44997 | 15.15  | 52.33  |
| 50000 | 0.93 | 0.0500 | 0.9500 | 125   | 4418 | 45125 | 2.36  | 0.0486 | 0.0514 | 0.9486 | 0.9514 | 118   | 4628 | 45253 | 132   | 4871 | 44997 | 10.34  | 43.01  |
| 50000 | 0.94 | 0.0500 | 0.9500 | 125   | 4465 | 45125 | 1.72  | 0.0486 | 0.0514 | 0.9486 | 0.9514 | 118   | 4628 | 45253 | 132   | 4871 | 44997 | 6.50   | 34.62  |
| 50000 | 0.95 | 0.0500 | 0.9500 | 125   | 4513 | 45125 | 1.18  | 0.0486 | 0.0514 | 0.9486 | 0.9514 | 118   | 4628 | 45253 | 132   | 4871 | 44997 | 3.63   | 27.16  |
| 50000 | 0.96 | 0.0500 | 0.9500 | 125   | 4560 | 45125 | 0.75  | 0.0486 | 0.0514 | 0.9486 | 0.9514 | 118   | 4628 | 45253 | 132   | 4871 | 44997 | 1.75   | 20.63  |

|       |      |        |        |     |      |       |       |        |        |        |        |     |      |       |     |      |       |        |        |
|-------|------|--------|--------|-----|------|-------|-------|--------|--------|--------|--------|-----|------|-------|-----|------|-------|--------|--------|
| 50000 | 0.97 | 0.0500 | 0.9500 | 125 | 4608 | 45125 | 0.42  | 0.0486 | 0.0514 | 0.9486 | 0.9514 | 118 | 4628 | 45253 | 132 | 4871 | 44997 | .83    | 15.02  |
| 50000 | 0.98 | 0.0500 | 0.9500 | 125 | 4655 | 45125 | 0.18  | 0.0486 | 0.0514 | 0.9486 | 0.9514 | 118 | 4628 | 45253 | 132 | 4871 | 44997 | .89    | 10.33  |
| 50000 | 0.99 | 0.0500 | 0.9500 | 125 | 4703 | 45125 | 0.05  | 0.0486 | 0.0514 | 0.9486 | 0.9514 | 118 | 4628 | 45253 | 132 | 4871 | 44997 | 1.93   | 6.58   |
| 50000 | 1.00 | 0.0500 | 0.9500 | 125 | 4750 | 45125 | 0.00  | 0.0486 | 0.0514 | 0.9486 | 0.9514 | 118 | 4628 | 45253 | 132 | 4871 | 44997 | 3.94   | 3.75   |
| 50000 | 1.01 | 0.0500 | 0.9500 | 125 | 4798 | 45125 | 0.04  | 0.0486 | 0.0514 | 0.9486 | 0.9514 | 118 | 4628 | 45253 | 132 | 4871 | 44997 | 6.93   | 1.84   |
| 50000 | 1.02 | 0.0500 | 0.9500 | 125 | 4845 | 45125 | 0.18  | 0.0486 | 0.0514 | 0.9486 | 0.9514 | 118 | 4628 | 45253 | 132 | 4871 | 44997 | 10.89  | .86    |
| 50000 | 1.03 | 0.0500 | 0.9500 | 125 | 4893 | 45125 | 0.40  | 0.0486 | 0.0514 | 0.9486 | 0.9514 | 118 | 4628 | 45253 | 132 | 4871 | 44997 | 15.83  | .81    |
| 50000 | 1.04 | 0.0500 | 0.9500 | 125 | 4940 | 45125 | 0.70  | 0.0486 | 0.0514 | 0.9486 | 0.9514 | 118 | 4628 | 45253 | 132 | 4871 | 44997 | 21.74  | 1.69   |
| 50000 | 1.05 | 0.0500 | 0.9500 | 125 | 4988 | 45125 | 1.08  | 0.0486 | 0.0514 | 0.9486 | 0.9514 | 118 | 4628 | 45253 | 132 | 4871 | 44997 | 28.63  | 3.49   |
| 50000 | 1.06 | 0.0500 | 0.9500 | 125 | 5035 | 45125 | 1.54  | 0.0486 | 0.0514 | 0.9486 | 0.9514 | 118 | 4628 | 45253 | 132 | 4871 | 44997 | 36.49  | 6.22   |
| 50000 | 1.07 | 0.0500 | 0.9500 | 125 | 5083 | 45125 | 2.08  | 0.0486 | 0.0514 | 0.9486 | 0.9514 | 118 | 4628 | 45253 | 132 | 4871 | 44997 | 45.32  | 9.87   |
| 50000 | 1.08 | 0.0500 | 0.9500 | 125 | 5130 | 45125 | 2.70  | 0.0486 | 0.0514 | 0.9486 | 0.9514 | 118 | 4628 | 45253 | 132 | 4871 | 44997 | 55.14  | 14.45  |
| 50000 | 1.09 | 0.0500 | 0.9500 | 125 | 5178 | 45125 | 3.39  | 0.0486 | 0.0514 | 0.9486 | 0.9514 | 118 | 4628 | 45253 | 132 | 4871 | 44997 | 65.92  | 19.96  |
| 50000 | 1.10 | 0.0500 | 0.9500 | 125 | 5225 | 45125 | 4.15  | 0.0486 | 0.0514 | 0.9486 | 0.9514 | 118 | 4628 | 45253 | 132 | 4871 | 44997 | 77.68  | 26.39  |
| 50000 | 1.11 | 0.0500 | 0.9500 | 125 | 5273 | 45125 | 4.98  | 0.0486 | 0.0514 | 0.9486 | 0.9514 | 118 | 4628 | 45253 | 132 | 4871 | 44997 | 90.42  | 33.75  |
| 50000 | 1.12 | 0.0500 | 0.9500 | 125 | 5320 | 45125 | 5.88  | 0.0486 | 0.0514 | 0.9486 | 0.9514 | 118 | 4628 | 45253 | 132 | 4871 | 44997 | 104.13 | 42.03  |
| 50000 | 1.13 | 0.0500 | 0.9500 | 125 | 5368 | 45125 | 6.85  | 0.0486 | 0.0514 | 0.9486 | 0.9514 | 118 | 4628 | 45253 | 132 | 4871 | 44997 | 118.82 | 51.24  |
| 50000 | 1.14 | 0.0500 | 0.9500 | 125 | 5415 | 45125 | 7.88  | 0.0486 | 0.0514 | 0.9486 | 0.9514 | 118 | 4628 | 45253 | 132 | 4871 | 44997 | 134.48 | 61.38  |
| 50000 | 1.15 | 0.0500 | 0.9500 | 125 | 5463 | 45125 | 8.98  | 0.0486 | 0.0514 | 0.9486 | 0.9514 | 118 | 4628 | 45253 | 132 | 4871 | 44997 | 151.12 | 72.45  |
| 50000 | 1.16 | 0.0500 | 0.9500 | 125 | 5510 | 45125 | 10.14 | 0.0486 | 0.0514 | 0.9486 | 0.9514 | 118 | 4628 | 45253 | 132 | 4871 | 44997 | 168.73 | 84.44  |
| 50000 | 1.17 | 0.0500 | 0.9500 | 125 | 5558 | 45125 | 11.37 | 0.0486 | 0.0514 | 0.9486 | 0.9514 | 118 | 4628 | 45253 | 132 | 4871 | 44997 | 187.32 | 97.36  |
| 50000 | 1.18 | 0.0500 | 0.9500 | 125 | 5605 | 45125 | 12.66 | 0.0486 | 0.0514 | 0.9486 | 0.9514 | 118 | 4628 | 45253 | 132 | 4871 | 44997 | 206.88 | 111.20 |
| 50000 | 1.19 | 0.0500 | 0.9500 | 125 | 5653 | 45125 | 14.00 | 0.0486 | 0.0514 | 0.9486 | 0.9514 | 118 | 4628 | 45253 | 132 | 4871 | 44997 | 227.41 | 125.97 |
| 50000 | 1.20 | 0.0500 | 0.9500 | 125 | 5700 | 45125 | 15.41 | 0.0486 | 0.0514 | 0.9486 | 0.9514 | 118 | 4628 | 45253 | 132 | 4871 | 44997 | 248.93 | 141.66 |
| 50000 | 0.80 | 0.1000 | 0.9000 | 500 | 7200 | 40500 | 78.35 | 0.0981 | 0.1019 | 0.8981 | 0.9019 | 482 | 8851 | 40668 | 519 | 9148 | 40333 | 309.33 | 416.34 |
| 50000 | 0.81 | 0.1000 | 0.9000 | 500 | 7290 | 40500 | 69.95 | 0.0981 | 0.1019 | 0.8981 | 0.9019 | 482 | 8851 | 40668 | 519 | 9148 | 40333 | 276.67 | 378.89 |
| 50000 | 0.82 | 0.1000 | 0.9000 | 500 | 7380 | 40500 | 62.11 | 0.0981 | 0.1019 | 0.8981 | 0.9019 | 482 | 8851 | 40668 | 519 | 9148 | 40333 | 245.84 | 343.21 |
| 50000 | 0.83 | 0.1000 | 0.9000 | 500 | 7470 | 40500 | 54.81 | 0.0981 | 0.1019 | 0.8981 | 0.9019 | 482 | 8851 | 40668 | 519 | 9148 | 40333 | 216.84 | 309.30 |
| 50000 | 0.84 | 0.1000 | 0.9000 | 500 | 7560 | 40500 | 48.05 | 0.0981 | 0.1019 | 0.8981 | 0.9019 | 482 | 8851 | 40668 | 519 | 9148 | 40333 | 189.67 | 277.16 |
| 50000 | 0.85 | 0.1000 | 0.9000 | 500 | 7650 | 40500 | 41.80 | 0.0981 | 0.1019 | 0.8981 | 0.9019 | 482 | 8851 | 40668 | 519 | 9148 | 40333 | 164.33 | 246.79 |
| 50000 | 0.86 | 0.1000 | 0.9000 | 500 | 7740 | 40500 | 36.05 | 0.0981 | 0.1019 | 0.8981 | 0.9019 | 482 | 8851 | 40668 | 519 | 9148 | 40333 | 140.83 | 218.20 |
| 50000 | 0.87 | 0.1000 | 0.9000 | 500 | 7830 | 40500 | 30.77 | 0.0981 | 0.1019 | 0.8981 | 0.9019 | 482 | 8851 | 40668 | 519 | 9148 | 40333 | 119.15 | 191.37 |
| 50000 | 0.88 | 0.1000 | 0.9000 | 500 | 7920 | 40500 | 25.97 | 0.0981 | 0.1019 | 0.8981 | 0.9019 | 482 | 8851 | 40668 | 519 | 9148 | 40333 | 99.30  | 166.32 |
| 50000 | 0.89 | 0.1000 | 0.9000 | 500 | 8010 | 40500 | 21.61 | 0.0981 | 0.1019 | 0.8981 | 0.9019 | 482 | 8851 | 40668 | 519 | 9148 | 40333 | 81.29  | 143.03 |
| 50000 | 0.90 | 0.1000 | 0.9000 | 500 | 8100 | 40500 | 17.69 | 0.0981 | 0.1019 | 0.8981 | 0.9019 | 482 | 8851 | 40668 | 519 | 9148 | 40333 | 65.10  | 121.52 |



|       |      |        |        |      |       |       |        |        |        |        |        |      |       |       |      |       |       |        |        |
|-------|------|--------|--------|------|-------|-------|--------|--------|--------|--------|--------|------|-------|-------|------|-------|-------|--------|--------|
| 50000 | 0.91 | 0.1000 | 0.9000 | 500  | 8190  | 40500 | 14.19  | 0.0981 | 0.1019 | 0.8981 | 0.9019 | 482  | 8851  | 40668 | 519  | 9148  | 40333 | 50.74  | 101.78 |
| 50000 | 0.92 | 0.1000 | 0.9000 | 500  | 8280  | 40500 | 11.11  | 0.0981 | 0.1019 | 0.8981 | 0.9019 | 482  | 8851  | 40668 | 519  | 9148  | 40333 | 38.22  | 83.80  |
| 50000 | 0.93 | 0.1000 | 0.9000 | 500  | 8370  | 40500 | 8.43   | 0.0981 | 0.1019 | 0.8981 | 0.9019 | 482  | 8851  | 40668 | 519  | 9148  | 40333 | 27.52  | 67.60  |
| 50000 | 0.94 | 0.1000 | 0.9000 | 500  | 8460  | 40500 | 6.14   | 0.0981 | 0.1019 | 0.8981 | 0.9019 | 482  | 8851  | 40668 | 519  | 9148  | 40333 | 18.66  | 53.17  |
| 50000 | 0.95 | 0.1000 | 0.9000 | 500  | 8550  | 40500 | 4.23   | 0.0981 | 0.1019 | 0.8981 | 0.9019 | 482  | 8851  | 40668 | 519  | 9148  | 40333 | 11.62  | 40.51  |
| 50000 | 0.96 | 0.1000 | 0.9000 | 500  | 8640  | 40500 | 2.68   | 0.0981 | 0.1019 | 0.8981 | 0.9019 | 482  | 8851  | 40668 | 519  | 9148  | 40333 | 6.42   | 29.63  |
| 50000 | 0.97 | 0.1000 | 0.9000 | 500  | 8730  | 40500 | 1.50   | 0.0981 | 0.1019 | 0.8981 | 0.9019 | 482  | 8851  | 40668 | 519  | 9148  | 40333 | 3.05   | 20.51  |
| 50000 | 0.98 | 0.1000 | 0.9000 | 500  | 8820  | 40500 | 0.66   | 0.0981 | 0.1019 | 0.8981 | 0.9019 | 482  | 8851  | 40668 | 519  | 9148  | 40333 | 1.50   | 13.16  |
| 50000 | 0.99 | 0.1000 | 0.9000 | 500  | 8910  | 40500 | 0.16   | 0.0981 | 0.1019 | 0.8981 | 0.9019 | 482  | 8851  | 40668 | 519  | 9148  | 40333 | 1.79   | 7.58   |
| 50000 | 1.00 | 0.1000 | 0.9000 | 500  | 9000  | 40500 | 0.00   | 0.0981 | 0.1019 | 0.8981 | 0.9019 | 482  | 8851  | 40668 | 519  | 9148  | 40333 | 3.91   | 3.78   |
| 50000 | 1.01 | 0.1000 | 0.9000 | 500  | 9090  | 40500 | 0.16   | 0.0981 | 0.1019 | 0.8981 | 0.9019 | 482  | 8851  | 40668 | 519  | 9148  | 40333 | 7.85   | 1.74   |
| 50000 | 1.02 | 0.1000 | 0.9000 | 500  | 9180  | 40500 | 0.64   | 0.0981 | 0.1019 | 0.8981 | 0.9019 | 482  | 8851  | 40668 | 519  | 9148  | 40333 | 13.63  | 1.48   |
| 50000 | 1.03 | 0.1000 | 0.9000 | 500  | 9270  | 40500 | 1.42   | 0.0981 | 0.1019 | 0.8981 | 0.9019 | 482  | 8851  | 40668 | 519  | 9148  | 40333 | 21.24  | 2.99   |
| 50000 | 1.04 | 0.1000 | 0.9000 | 500  | 9360  | 40500 | 2.51   | 0.0981 | 0.1019 | 0.8981 | 0.9019 | 482  | 8851  | 40668 | 519  | 9148  | 40333 | 30.68  | 6.27   |
| 50000 | 1.05 | 0.1000 | 0.9000 | 500  | 9450  | 40500 | 3.89   | 0.0981 | 0.1019 | 0.8981 | 0.9019 | 482  | 8851  | 40668 | 519  | 9148  | 40333 | 41.95  | 11.31  |
| 50000 | 1.06 | 0.1000 | 0.9000 | 500  | 9540  | 40500 | 5.56   | 0.0981 | 0.1019 | 0.8981 | 0.9019 | 482  | 8851  | 40668 | 519  | 9148  | 40333 | 55.05  | 18.13  |
| 50000 | 1.07 | 0.1000 | 0.9000 | 500  | 9630  | 40500 | 7.51   | 0.0981 | 0.1019 | 0.8981 | 0.9019 | 482  | 8851  | 40668 | 519  | 9148  | 40333 | 69.97  | 26.72  |
| 50000 | 1.08 | 0.1000 | 0.9000 | 500  | 9720  | 40500 | 9.74   | 0.0981 | 0.1019 | 0.8981 | 0.9019 | 482  | 8851  | 40668 | 519  | 9148  | 40333 | 86.73  | 37.08  |
| 50000 | 1.09 | 0.1000 | 0.9000 | 500  | 9810  | 40500 | 12.24  | 0.0981 | 0.1019 | 0.8981 | 0.9019 | 482  | 8851  | 40668 | 519  | 9148  | 40333 | 105.32 | 49.22  |
| 50000 | 1.10 | 0.1000 | 0.9000 | 500  | 9900  | 40500 | 15.00  | 0.0981 | 0.1019 | 0.8981 | 0.9019 | 482  | 8851  | 40668 | 519  | 9148  | 40333 | 125.74 | 63.12  |
| 50000 | 1.11 | 0.1000 | 0.9000 | 500  | 9990  | 40500 | 18.02  | 0.0981 | 0.1019 | 0.8981 | 0.9019 | 482  | 8851  | 40668 | 519  | 9148  | 40333 | 148.00 | 78.79  |
| 50000 | 1.12 | 0.1000 | 0.9000 | 500  | 10080 | 40500 | 21.30  | 0.0981 | 0.1019 | 0.8981 | 0.9019 | 482  | 8851  | 40668 | 519  | 9148  | 40333 | 172.08 | 96.24  |
| 50000 | 1.13 | 0.1000 | 0.9000 | 500  | 10170 | 40500 | 24.82  | 0.0981 | 0.1019 | 0.8981 | 0.9019 | 482  | 8851  | 40668 | 519  | 9148  | 40333 | 197.99 | 115.45 |
| 50000 | 1.14 | 0.1000 | 0.9000 | 500  | 10260 | 40500 | 28.59  | 0.0981 | 0.1019 | 0.8981 | 0.9019 | 482  | 8851  | 40668 | 519  | 9148  | 40333 | 225.73 | 136.44 |
| 50000 | 1.15 | 0.1000 | 0.9000 | 500  | 10350 | 40500 | 32.60  | 0.0981 | 0.1019 | 0.8981 | 0.9019 | 482  | 8851  | 40668 | 519  | 9148  | 40333 | 255.30 | 159.19 |
| 50000 | 1.16 | 0.1000 | 0.9000 | 500  | 10440 | 40500 | 36.84  | 0.0981 | 0.1019 | 0.8981 | 0.9019 | 482  | 8851  | 40668 | 519  | 9148  | 40333 | 286.70 | 183.72 |
| 50000 | 1.17 | 0.1000 | 0.9000 | 500  | 10530 | 40500 | 41.31  | 0.0981 | 0.1019 | 0.8981 | 0.9019 | 482  | 8851  | 40668 | 519  | 9148  | 40333 | 319.94 | 210.02 |
| 50000 | 1.18 | 0.1000 | 0.9000 | 500  | 10620 | 40500 | 46.01  | 0.0981 | 0.1019 | 0.8981 | 0.9019 | 482  | 8851  | 40668 | 519  | 9148  | 40333 | 355.00 | 238.09 |
| 50000 | 1.19 | 0.1000 | 0.9000 | 500  | 10710 | 40500 | 50.93  | 0.0981 | 0.1019 | 0.8981 | 0.9019 | 482  | 8851  | 40668 | 519  | 9148  | 40333 | 391.89 | 267.93 |
| 50000 | 1.20 | 0.1000 | 0.9000 | 500  | 10800 | 40500 | 56.07  | 0.0981 | 0.1019 | 0.8981 | 0.9019 | 482  | 8851  | 40668 | 519  | 9148  | 40333 | 430.62 | 299.54 |
| 50000 | 0.80 | 0.1500 | 0.8500 | 1125 | 10200 | 36125 | 154.23 | 0.1478 | 0.1522 | 0.8478 | 0.8522 | 1092 | 12595 | 36313 | 1158 | 12904 | 35937 | 457.25 | 568.73 |
| 50000 | 0.81 | 0.1500 | 0.8500 | 1125 | 10328 | 36125 | 137.85 | 0.1478 | 0.1522 | 0.8478 | 0.8522 | 1092 | 12595 | 36313 | 1158 | 12904 | 35937 | 410.06 | 516.54 |
| 50000 | 0.82 | 0.1500 | 0.8500 | 1125 | 10455 | 36125 | 122.54 | 0.1478 | 0.1522 | 0.8478 | 0.8522 | 1092 | 12595 | 36313 | 1158 | 12904 | 35937 | 365.45 | 466.88 |
| 50000 | 0.83 | 0.1500 | 0.8500 | 1125 | 10583 | 36125 | 108.28 | 0.1478 | 0.1522 | 0.8478 | 0.8522 | 1092 | 12595 | 36313 | 1158 | 12904 | 35937 | 323.42 | 419.74 |
| 50000 | 0.84 | 0.1500 | 0.8500 | 1125 | 10710 | 36125 | 95.03  | 0.1478 | 0.1522 | 0.8478 | 0.8522 | 1092 | 12595 | 36313 | 1158 | 12904 | 35937 | 283.97 | 375.12 |

|       |      |        |        |      |       |       |        |        |        |        |        |      |       |       |      |       |       |        |        |
|-------|------|--------|--------|------|-------|-------|--------|--------|--------|--------|--------|------|-------|-------|------|-------|-------|--------|--------|
| 50000 | 0.85 | 0.1500 | 0.8500 | 1125 | 10838 | 36125 | 82.76  | 0.1478 | 0.1522 | 0.8478 | 0.8522 | 1092 | 12595 | 36313 | 1158 | 12904 | 35937 | 247.11 | 333.01 |
| 50000 | 0.86 | 0.1500 | 0.8500 | 1125 | 10965 | 36125 | 71.44  | 0.1478 | 0.1522 | 0.8478 | 0.8522 | 1092 | 12595 | 36313 | 1158 | 12904 | 35937 | 212.82 | 293.43 |
| 50000 | 0.87 | 0.1500 | 0.8500 | 1125 | 11093 | 36125 | 61.06  | 0.1478 | 0.1522 | 0.8478 | 0.8522 | 1092 | 12595 | 36313 | 1158 | 12904 | 35937 | 181.12 | 256.36 |
| 50000 | 0.88 | 0.1500 | 0.8500 | 1125 | 11220 | 36125 | 51.57  | 0.1478 | 0.1522 | 0.8478 | 0.8522 | 1092 | 12595 | 36313 | 1158 | 12904 | 35937 | 152.00 | 221.82 |
| 50000 | 0.89 | 0.1500 | 0.8500 | 1125 | 11348 | 36125 | 42.96  | 0.1478 | 0.1522 | 0.8478 | 0.8522 | 1092 | 12595 | 36313 | 1158 | 12904 | 35937 | 125.46 | 189.79 |
| 50000 | 0.90 | 0.1500 | 0.8500 | 1125 | 11475 | 36125 | 35.20  | 0.1478 | 0.1522 | 0.8478 | 0.8522 | 1092 | 12595 | 36313 | 1158 | 12904 | 35937 | 101.50 | 160.29 |
| 50000 | 0.91 | 0.1500 | 0.8500 | 1125 | 11603 | 36125 | 28.27  | 0.1478 | 0.1522 | 0.8478 | 0.8522 | 1092 | 12595 | 36313 | 1158 | 12904 | 35937 | 80.12  | 133.30 |
| 50000 | 0.92 | 0.1500 | 0.8500 | 1125 | 11730 | 36125 | 22.16  | 0.1478 | 0.1522 | 0.8478 | 0.8522 | 1092 | 12595 | 36313 | 1158 | 12904 | 35937 | 61.32  | 108.83 |
| 50000 | 0.93 | 0.1500 | 0.8500 | 1125 | 11858 | 36125 | 16.82  | 0.1478 | 0.1522 | 0.8478 | 0.8522 | 1092 | 12595 | 36313 | 1158 | 12904 | 35937 | 45.11  | 86.88  |
| 50000 | 0.94 | 0.1500 | 0.8500 | 1125 | 11985 | 36125 | 12.26  | 0.1478 | 0.1522 | 0.8478 | 0.8522 | 1092 | 12595 | 36313 | 1158 | 12904 | 35937 | 31.48  | 67.46  |
| 50000 | 0.95 | 0.1500 | 0.8500 | 1125 | 12113 | 36125 | 8.45   | 0.1478 | 0.1522 | 0.8478 | 0.8522 | 1092 | 12595 | 36313 | 1158 | 12904 | 35937 | 20.42  | 50.55  |
| 50000 | 0.96 | 0.1500 | 0.8500 | 1125 | 12240 | 36125 | 5.36   | 0.1478 | 0.1522 | 0.8478 | 0.8522 | 1092 | 12595 | 36313 | 1158 | 12904 | 35937 | 11.95  | 36.16  |
| 50000 | 0.97 | 0.1500 | 0.8500 | 1125 | 12368 | 36125 | 2.99   | 0.1478 | 0.1522 | 0.8478 | 0.8522 | 1092 | 12595 | 36313 | 1158 | 12904 | 35937 | 6.07   | 24.29  |
| 50000 | 0.98 | 0.1500 | 0.8500 | 1125 | 12495 | 36125 | 1.32   | 0.1478 | 0.1522 | 0.8478 | 0.8522 | 1092 | 12595 | 36313 | 1158 | 12904 | 35937 | 2.76   | 14.94  |
| 50000 | 0.99 | 0.1500 | 0.8500 | 1125 | 12623 | 36125 | 0.33   | 0.1478 | 0.1522 | 0.8478 | 0.8522 | 1092 | 12595 | 36313 | 1158 | 12904 | 35937 | 2.03   | 8.11   |
| 50000 | 1.00 | 0.1500 | 0.8500 | 1125 | 12750 | 36125 | 0.00   | 0.1478 | 0.1522 | 0.8478 | 0.8522 | 1092 | 12595 | 36313 | 1158 | 12904 | 35937 | 3.89   | 3.80   |
| 50000 | 1.01 | 0.1500 | 0.8500 | 1125 | 12878 | 36125 | 0.32   | 0.1478 | 0.1522 | 0.8478 | 0.8522 | 1092 | 12595 | 36313 | 1158 | 12904 | 35937 | 8.33   | 2.00   |
| 50000 | 1.02 | 0.1500 | 0.8500 | 1125 | 13005 | 36125 | 1.28   | 0.1478 | 0.1522 | 0.8478 | 0.8522 | 1092 | 12595 | 36313 | 1158 | 12904 | 35937 | 15.35  | 2.73   |
| 50000 | 1.03 | 0.1500 | 0.8500 | 1125 | 13133 | 36125 | 2.86   | 0.1478 | 0.1522 | 0.8478 | 0.8522 | 1092 | 12595 | 36313 | 1158 | 12904 | 35937 | 24.95  | 5.98   |
| 50000 | 1.04 | 0.1500 | 0.8500 | 1125 | 13260 | 36125 | 5.05   | 0.1478 | 0.1522 | 0.8478 | 0.8522 | 1092 | 12595 | 36313 | 1158 | 12904 | 35937 | 37.13  | 11.74  |
| 50000 | 1.05 | 0.1500 | 0.8500 | 1125 | 13388 | 36125 | 7.84   | 0.1478 | 0.1522 | 0.8478 | 0.8522 | 1092 | 12595 | 36313 | 1158 | 12904 | 35937 | 51.89  | 20.03  |
| 50000 | 1.06 | 0.1500 | 0.8500 | 1125 | 13515 | 36125 | 11.21  | 0.1478 | 0.1522 | 0.8478 | 0.8522 | 1092 | 12595 | 36313 | 1158 | 12904 | 35937 | 69.23  | 30.84  |
| 50000 | 1.07 | 0.1500 | 0.8500 | 1125 | 13643 | 36125 | 15.15  | 0.1478 | 0.1522 | 0.8478 | 0.8522 | 1092 | 12595 | 36313 | 1158 | 12904 | 35937 | 89.16  | 44.16  |
| 50000 | 1.08 | 0.1500 | 0.8500 | 1125 | 13770 | 36125 | 19.66  | 0.1478 | 0.1522 | 0.8478 | 0.8522 | 1092 | 12595 | 36313 | 1158 | 12904 | 35937 | 111.67 | 60.01  |
| 50000 | 1.09 | 0.1500 | 0.8500 | 1125 | 13898 | 36125 | 24.71  | 0.1478 | 0.1522 | 0.8478 | 0.8522 | 1092 | 12595 | 36313 | 1158 | 12904 | 35937 | 136.76 | 78.37  |
| 50000 | 1.10 | 0.1500 | 0.8500 | 1125 | 14025 | 36125 | 30.31  | 0.1478 | 0.1522 | 0.8478 | 0.8522 | 1092 | 12595 | 36313 | 1158 | 12904 | 35937 | 164.43 | 99.25  |
| 50000 | 1.11 | 0.1500 | 0.8500 | 1125 | 14153 | 36125 | 36.43  | 0.1478 | 0.1522 | 0.8478 | 0.8522 | 1092 | 12595 | 36313 | 1158 | 12904 | 35937 | 194.68 | 122.66 |
| 50000 | 1.12 | 0.1500 | 0.8500 | 1125 | 14280 | 36125 | 43.08  | 0.1478 | 0.1522 | 0.8478 | 0.8522 | 1092 | 12595 | 36313 | 1158 | 12904 | 35937 | 227.51 | 148.58 |
| 50000 | 1.13 | 0.1500 | 0.8500 | 1125 | 14408 | 36125 | 50.23  | 0.1478 | 0.1522 | 0.8478 | 0.8522 | 1092 | 12595 | 36313 | 1158 | 12904 | 35937 | 262.93 | 177.02 |
| 50000 | 1.14 | 0.1500 | 0.8500 | 1125 | 14535 | 36125 | 57.89  | 0.1478 | 0.1522 | 0.8478 | 0.8522 | 1092 | 12595 | 36313 | 1158 | 12904 | 35937 | 300.92 | 207.98 |
| 50000 | 1.15 | 0.1500 | 0.8500 | 1125 | 14663 | 36125 | 66.04  | 0.1478 | 0.1522 | 0.8478 | 0.8522 | 1092 | 12595 | 36313 | 1158 | 12904 | 35937 | 341.50 | 241.46 |
| 50000 | 1.16 | 0.1500 | 0.8500 | 1125 | 14790 | 36125 | 74.67  | 0.1478 | 0.1522 | 0.8478 | 0.8522 | 1092 | 12595 | 36313 | 1158 | 12904 | 35937 | 384.66 | 277.46 |
| 50000 | 1.17 | 0.1500 | 0.8500 | 1125 | 14918 | 36125 | 83.78  | 0.1478 | 0.1522 | 0.8478 | 0.8522 | 1092 | 12595 | 36313 | 1158 | 12904 | 35937 | 430.40 | 315.98 |
| 50000 | 1.18 | 0.1500 | 0.8500 | 1125 | 15045 | 36125 | 93.36  | 0.1478 | 0.1522 | 0.8478 | 0.8522 | 1092 | 12595 | 36313 | 1158 | 12904 | 35937 | 478.72 | 357.02 |
| 50000 | 1.19 | 0.1500 | 0.8500 | 1125 | 15173 | 36125 | 103.39 | 0.1478 | 0.1522 | 0.8478 | 0.8522 | 1092 | 12595 | 36313 | 1158 | 12904 | 35937 | 529.63 | 400.58 |

|       |      |        |        |      |       |       |        |        |        |        |        |      |       |       |      |       |       |        |        |
|-------|------|--------|--------|------|-------|-------|--------|--------|--------|--------|--------|------|-------|-------|------|-------|-------|--------|--------|
| 50000 | 1.20 | 0.1500 | 0.8500 | 1125 | 15300 | 36125 | 113.88 | 0.1478 | 0.1522 | 0.8478 | 0.8522 | 1092 | 12595 | 36313 | 1158 | 12904 | 35937 | 583.11 | 446.66 |
| 50000 | 0.80 | 0.2000 | 0.8000 | 2000 | 12800 | 32000 | 238.78 | 0.1975 | 0.2025 | 0.7975 | 0.8025 | 1951 | 15851 | 32199 | 2050 | 16148 | 31802 | 589.60 | 696.65 |
| 50000 | 0.81 | 0.2000 | 0.8000 | 2000 | 12960 | 32000 | 213.64 | 0.1975 | 0.2025 | 0.7975 | 0.8025 | 1951 | 15851 | 32199 | 2050 | 16148 | 31802 | 529.63 | 631.88 |
| 50000 | 0.82 | 0.2000 | 0.8000 | 2000 | 13120 | 32000 | 190.12 | 0.1975 | 0.2025 | 0.7975 | 0.8025 | 1951 | 15851 | 32199 | 2050 | 16148 | 31802 | 472.88 | 570.29 |
| 50000 | 0.83 | 0.2000 | 0.8000 | 2000 | 13280 | 32000 | 168.17 | 0.1975 | 0.2025 | 0.7975 | 0.8025 | 1951 | 15851 | 32199 | 2050 | 16148 | 31802 | 419.37 | 511.87 |
| 50000 | 0.84 | 0.2000 | 0.8000 | 2000 | 13440 | 32000 | 147.73 | 0.1975 | 0.2025 | 0.7975 | 0.8025 | 1951 | 15851 | 32199 | 2050 | 16148 | 31802 | 369.09 | 456.62 |
| 50000 | 0.85 | 0.2000 | 0.8000 | 2000 | 13600 | 32000 | 128.78 | 0.1975 | 0.2025 | 0.7975 | 0.8025 | 1951 | 15851 | 32199 | 2050 | 16148 | 31802 | 322.04 | 404.54 |
| 50000 | 0.86 | 0.2000 | 0.8000 | 2000 | 13760 | 32000 | 111.28 | 0.1975 | 0.2025 | 0.7975 | 0.8025 | 1951 | 15851 | 32199 | 2050 | 16148 | 31802 | 278.22 | 355.63 |
| 50000 | 0.87 | 0.2000 | 0.8000 | 2000 | 13920 | 32000 | 95.19  | 0.1975 | 0.2025 | 0.7975 | 0.8025 | 1951 | 15851 | 32199 | 2050 | 16148 | 31802 | 237.62 | 309.89 |
| 50000 | 0.88 | 0.2000 | 0.8000 | 2000 | 14080 | 32000 | 80.47  | 0.1975 | 0.2025 | 0.7975 | 0.8025 | 1951 | 15851 | 32199 | 2050 | 16148 | 31802 | 200.26 | 267.32 |
| 50000 | 0.89 | 0.2000 | 0.8000 | 2000 | 14240 | 32000 | 67.09  | 0.1975 | 0.2025 | 0.7975 | 0.8025 | 1951 | 15851 | 32199 | 2050 | 16148 | 31802 | 166.13 | 227.92 |
| 50000 | 0.90 | 0.2000 | 0.8000 | 2000 | 14400 | 32000 | 55.03  | 0.1975 | 0.2025 | 0.7975 | 0.8025 | 1951 | 15851 | 32199 | 2050 | 16148 | 31802 | 135.23 | 191.69 |
| 50000 | 0.91 | 0.2000 | 0.8000 | 2000 | 14560 | 32000 | 44.23  | 0.1975 | 0.2025 | 0.7975 | 0.8025 | 1951 | 15851 | 32199 | 2050 | 16148 | 31802 | 107.56 | 158.64 |
| 50000 | 0.92 | 0.2000 | 0.8000 | 2000 | 14720 | 32000 | 34.69  | 0.1975 | 0.2025 | 0.7975 | 0.8025 | 1951 | 15851 | 32199 | 2050 | 16148 | 31802 | 83.12  | 128.75 |
| 50000 | 0.93 | 0.2000 | 0.8000 | 2000 | 14880 | 32000 | 26.36  | 0.1975 | 0.2025 | 0.7975 | 0.8025 | 1951 | 15851 | 32199 | 2050 | 16148 | 31802 | 61.91  | 102.04 |
| 50000 | 0.94 | 0.2000 | 0.8000 | 2000 | 15040 | 32000 | 19.23  | 0.1975 | 0.2025 | 0.7975 | 0.8025 | 1951 | 15851 | 32199 | 2050 | 16148 | 31802 | 43.93  | 78.49  |
| 50000 | 0.95 | 0.2000 | 0.8000 | 2000 | 15200 | 32000 | 13.26  | 0.1975 | 0.2025 | 0.7975 | 0.8025 | 1951 | 15851 | 32199 | 2050 | 16148 | 31802 | 29.18  | 58.12  |
| 50000 | 0.96 | 0.2000 | 0.8000 | 2000 | 15360 | 32000 | 8.42   | 0.1975 | 0.2025 | 0.7975 | 0.8025 | 1951 | 15851 | 32199 | 2050 | 16148 | 31802 | 17.66  | 40.91  |
| 50000 | 0.97 | 0.2000 | 0.8000 | 2000 | 15520 | 32000 | 4.70   | 0.1975 | 0.2025 | 0.7975 | 0.8025 | 1951 | 15851 | 32199 | 2050 | 16148 | 31802 | 9.37   | 26.88  |
| 50000 | 0.98 | 0.2000 | 0.8000 | 2000 | 15680 | 32000 | 2.08   | 0.1975 | 0.2025 | 0.7975 | 0.8025 | 1951 | 15851 | 32199 | 2050 | 16148 | 31802 | 4.31   | 16.02  |
| 50000 | 0.99 | 0.2000 | 0.8000 | 2000 | 15840 | 32000 | 0.52   | 0.1975 | 0.2025 | 0.7975 | 0.8025 | 1951 | 15851 | 32199 | 2050 | 16148 | 31802 | 2.48   | 8.33   |
| 50000 | 1.00 | 0.2000 | 0.8000 | 2000 | 16000 | 32000 | 0.00   | 0.1975 | 0.2025 | 0.7975 | 0.8025 | 1951 | 15851 | 32199 | 2050 | 16148 | 31802 | 3.88   | 3.81   |
| 50000 | 1.01 | 0.2000 | 0.8000 | 2000 | 16160 | 32000 | 0.51   | 0.1975 | 0.2025 | 0.7975 | 0.8025 | 1951 | 15851 | 32199 | 2050 | 16148 | 31802 | 8.51   | 2.46   |
| 50000 | 1.02 | 0.2000 | 0.8000 | 2000 | 16320 | 32000 | 2.02   | 0.1975 | 0.2025 | 0.7975 | 0.8025 | 1951 | 15851 | 32199 | 2050 | 16148 | 31802 | 16.37  | 4.28   |
| 50000 | 1.03 | 0.2000 | 0.8000 | 2000 | 16480 | 32000 | 4.52   | 0.1975 | 0.2025 | 0.7975 | 0.8025 | 1951 | 15851 | 32199 | 2050 | 16148 | 31802 | 27.46  | 9.27   |
| 50000 | 1.04 | 0.2000 | 0.8000 | 2000 | 16640 | 32000 | 7.98   | 0.1975 | 0.2025 | 0.7975 | 0.8025 | 1951 | 15851 | 32199 | 2050 | 16148 | 31802 | 41.78  | 17.43  |
| 50000 | 1.05 | 0.2000 | 0.8000 | 2000 | 16800 | 32000 | 12.38  | 0.1975 | 0.2025 | 0.7975 | 0.8025 | 1951 | 15851 | 32199 | 2050 | 16148 | 31802 | 59.33  | 28.76  |
| 50000 | 1.06 | 0.2000 | 0.8000 | 2000 | 16960 | 32000 | 17.72  | 0.1975 | 0.2025 | 0.7975 | 0.8025 | 1951 | 15851 | 32199 | 2050 | 16148 | 31802 | 80.11  | 43.26  |
| 50000 | 1.07 | 0.2000 | 0.8000 | 2000 | 17120 | 32000 | 23.96  | 0.1975 | 0.2025 | 0.7975 | 0.8025 | 1951 | 15851 | 32199 | 2050 | 16148 | 31802 | 104.13 | 60.94  |
| 50000 | 1.08 | 0.2000 | 0.8000 | 2000 | 17280 | 32000 | 31.10  | 0.1975 | 0.2025 | 0.7975 | 0.8025 | 1951 | 15851 | 32199 | 2050 | 16148 | 31802 | 131.37 | 81.78  |
| 50000 | 1.09 | 0.2000 | 0.8000 | 2000 | 17440 | 32000 | 39.12  | 0.1975 | 0.2025 | 0.7975 | 0.8025 | 1951 | 15851 | 32199 | 2050 | 16148 | 31802 | 161.84 | 105.80 |
| 50000 | 1.10 | 0.2000 | 0.8000 | 2000 | 17600 | 32000 | 48.00  | 0.1975 | 0.2025 | 0.7975 | 0.8025 | 1951 | 15851 | 32199 | 2050 | 16148 | 31802 | 195.54 | 132.98 |
| 50000 | 1.11 | 0.2000 | 0.8000 | 2000 | 17760 | 32000 | 57.73  | 0.1975 | 0.2025 | 0.7975 | 0.8025 | 1951 | 15851 | 32199 | 2050 | 16148 | 31802 | 232.47 | 163.34 |
| 50000 | 1.12 | 0.2000 | 0.8000 | 2000 | 17920 | 32000 | 68.29  | 0.1975 | 0.2025 | 0.7975 | 0.8025 | 1951 | 15851 | 32199 | 2050 | 16148 | 31802 | 272.64 | 196.87 |
| 50000 | 1.13 | 0.2000 | 0.8000 | 2000 | 18080 | 32000 | 79.68  | 0.1975 | 0.2025 | 0.7975 | 0.8025 | 1951 | 15851 | 32199 | 2050 | 16148 | 31802 | 316.03 | 233.56 |

|       |      |        |        |      |       |       |        |        |        |        |        |      |       |       |      |       |       |        |        |
|-------|------|--------|--------|------|-------|-------|--------|--------|--------|--------|--------|------|-------|-------|------|-------|-------|--------|--------|
| 50000 | 1.14 | 0.2000 | 0.8000 | 2000 | 18240 | 32000 | 91.86  | 0.1975 | 0.2025 | 0.7975 | 0.8025 | 1951 | 15851 | 32199 | 2050 | 16148 | 31802 | 362.65 | 273.43 |
| 50000 | 1.15 | 0.2000 | 0.8000 | 2000 | 18400 | 32000 | 104.84 | 0.1975 | 0.2025 | 0.7975 | 0.8025 | 1951 | 15851 | 32199 | 2050 | 16148 | 31802 | 412.50 | 316.47 |
| 50000 | 1.16 | 0.2000 | 0.8000 | 2000 | 18560 | 32000 | 118.59 | 0.1975 | 0.2025 | 0.7975 | 0.8025 | 1951 | 15851 | 32199 | 2050 | 16148 | 31802 | 465.59 | 362.68 |
| 50000 | 1.17 | 0.2000 | 0.8000 | 2000 | 18720 | 32000 | 133.12 | 0.1975 | 0.2025 | 0.7975 | 0.8025 | 1951 | 15851 | 32199 | 2050 | 16148 | 31802 | 521.90 | 412.06 |
| 50000 | 1.18 | 0.2000 | 0.8000 | 2000 | 18880 | 32000 | 148.39 | 0.1975 | 0.2025 | 0.7975 | 0.8025 | 1951 | 15851 | 32199 | 2050 | 16148 | 31802 | 581.44 | 464.61 |
| 50000 | 1.19 | 0.2000 | 0.8000 | 2000 | 19040 | 32000 | 164.41 | 0.1975 | 0.2025 | 0.7975 | 0.8025 | 1951 | 15851 | 32199 | 2050 | 16148 | 31802 | 644.22 | 520.33 |
| 50000 | 1.20 | 0.2000 | 0.8000 | 2000 | 19200 | 32000 | 181.16 | 0.1975 | 0.2025 | 0.7975 | 0.8025 | 1951 | 15851 | 32199 | 2050 | 16148 | 31802 | 710.22 | 579.22 |
| 50000 | 0.80 | 0.2500 | 0.7500 | 3125 | 15000 | 28125 | 323.17 | 0.2473 | 0.2527 | 0.7473 | 0.7527 | 3058 | 18615 | 28327 | 3192 | 18883 | 27924 | 704.95 | 801.52 |
| 50000 | 0.81 | 0.2500 | 0.7500 | 3125 | 15188 | 28125 | 289.43 | 0.2473 | 0.2527 | 0.7473 | 0.7527 | 3058 | 18615 | 28327 | 3192 | 18883 | 27924 | 634.01 | 726.27 |
| 50000 | 0.82 | 0.2500 | 0.7500 | 3125 | 15375 | 28125 | 257.79 | 0.2473 | 0.2527 | 0.7473 | 0.7527 | 3058 | 18615 | 28327 | 3192 | 18883 | 27924 | 566.85 | 654.73 |
| 50000 | 0.83 | 0.2500 | 0.7500 | 3125 | 15563 | 28125 | 228.22 | 0.2473 | 0.2527 | 0.7473 | 0.7527 | 3058 | 18615 | 28327 | 3192 | 18883 | 27924 | 503.47 | 586.92 |
| 50000 | 0.84 | 0.2500 | 0.7500 | 3125 | 15750 | 28125 | 200.66 | 0.2473 | 0.2527 | 0.7473 | 0.7527 | 3058 | 18615 | 28327 | 3192 | 18883 | 27924 | 443.86 | 522.83 |
| 50000 | 0.85 | 0.2500 | 0.7500 | 3125 | 15938 | 28125 | 175.07 | 0.2473 | 0.2527 | 0.7473 | 0.7527 | 3058 | 18615 | 28327 | 3192 | 18883 | 27924 | 388.04 | 462.47 |
| 50000 | 0.86 | 0.2500 | 0.7500 | 3125 | 16125 | 28125 | 151.40 | 0.2473 | 0.2527 | 0.7473 | 0.7527 | 3058 | 18615 | 28327 | 3192 | 18883 | 27924 | 335.98 | 405.82 |
| 50000 | 0.87 | 0.2500 | 0.7500 | 3125 | 16313 | 28125 | 129.61 | 0.2473 | 0.2527 | 0.7473 | 0.7527 | 3058 | 18615 | 28327 | 3192 | 18883 | 27924 | 287.71 | 352.91 |
| 50000 | 0.88 | 0.2500 | 0.7500 | 3125 | 16500 | 28125 | 109.65 | 0.2473 | 0.2527 | 0.7473 | 0.7527 | 3058 | 18615 | 28327 | 3192 | 18883 | 27924 | 243.21 | 303.71 |
| 50000 | 0.89 | 0.2500 | 0.7500 | 3125 | 16688 | 28125 | 91.49  | 0.2473 | 0.2527 | 0.7473 | 0.7527 | 3058 | 18615 | 28327 | 3192 | 18883 | 27924 | 202.49 | 258.24 |
| 50000 | 0.90 | 0.2500 | 0.7500 | 3125 | 16875 | 28125 | 75.09  | 0.2473 | 0.2527 | 0.7473 | 0.7527 | 3058 | 18615 | 28327 | 3192 | 18883 | 27924 | 165.55 | 216.49 |
| 50000 | 0.91 | 0.2500 | 0.7500 | 3125 | 17063 | 28125 | 60.41  | 0.2473 | 0.2527 | 0.7473 | 0.7527 | 3058 | 18615 | 28327 | 3192 | 18883 | 27924 | 132.39 | 178.47 |
| 50000 | 0.92 | 0.2500 | 0.7500 | 3125 | 17250 | 28125 | 47.40  | 0.2473 | 0.2527 | 0.7473 | 0.7527 | 3058 | 18615 | 28327 | 3192 | 18883 | 27924 | 103.00 | 144.17 |
| 50000 | 0.93 | 0.2500 | 0.7500 | 3125 | 17438 | 28125 | 36.05  | 0.2473 | 0.2527 | 0.7473 | 0.7527 | 3058 | 18615 | 28327 | 3192 | 18883 | 27924 | 77.39  | 113.59 |
| 50000 | 0.94 | 0.2500 | 0.7500 | 3125 | 17625 | 28125 | 26.31  | 0.2473 | 0.2527 | 0.7473 | 0.7527 | 3058 | 18615 | 28327 | 3192 | 18883 | 27924 | 55.55  | 86.74  |
| 50000 | 0.95 | 0.2500 | 0.7500 | 3125 | 17813 | 28125 | 18.15  | 0.2473 | 0.2527 | 0.7473 | 0.7527 | 3058 | 18615 | 28327 | 3192 | 18883 | 27924 | 37.50  | 63.61  |
| 50000 | 0.96 | 0.2500 | 0.7500 | 3125 | 18000 | 28125 | 11.54  | 0.2473 | 0.2527 | 0.7473 | 0.7527 | 3058 | 18615 | 28327 | 3192 | 18883 | 27924 | 23.22  | 44.20  |
| 50000 | 0.97 | 0.2500 | 0.7500 | 3125 | 18188 | 28125 | 6.45   | 0.2473 | 0.2527 | 0.7473 | 0.7527 | 3058 | 18615 | 28327 | 3192 | 18883 | 27924 | 12.71  | 28.52  |
| 50000 | 0.98 | 0.2500 | 0.7500 | 3125 | 18375 | 28125 | 2.85   | 0.2473 | 0.2527 | 0.7473 | 0.7527 | 3058 | 18615 | 28327 | 3192 | 18883 | 27924 | 5.99   | 16.56  |
| 50000 | 0.99 | 0.2500 | 0.7500 | 3125 | 18563 | 28125 | 0.71   | 0.2473 | 0.2527 | 0.7473 | 0.7527 | 3058 | 18615 | 28327 | 3192 | 18883 | 27924 | 3.04   | 8.33   |
| 50000 | 1.00 | 0.2500 | 0.7500 | 3125 | 18750 | 28125 | 0.00   | 0.2473 | 0.2527 | 0.7473 | 0.7527 | 3058 | 18615 | 28327 | 3192 | 18883 | 27924 | 3.87   | 3.81   |
| 50000 | 1.01 | 0.2500 | 0.7500 | 3125 | 18938 | 28125 | 0.70   | 0.2473 | 0.2527 | 0.7473 | 0.7527 | 3058 | 18615 | 28327 | 3192 | 18883 | 27924 | 8.48   | 3.03   |
| 50000 | 1.02 | 0.2500 | 0.7500 | 3125 | 19125 | 28125 | 2.78   | 0.2473 | 0.2527 | 0.7473 | 0.7527 | 3058 | 18615 | 28327 | 3192 | 18883 | 27924 | 16.86  | 5.96   |
| 50000 | 1.03 | 0.2500 | 0.7500 | 3125 | 19313 | 28125 | 6.21   | 0.2473 | 0.2527 | 0.7473 | 0.7527 | 3058 | 18615 | 28327 | 3192 | 18883 | 27924 | 29.02  | 12.62  |
| 50000 | 1.04 | 0.2500 | 0.7500 | 3125 | 19500 | 28125 | 10.98  | 0.2473 | 0.2527 | 0.7473 | 0.7527 | 3058 | 18615 | 28327 | 3192 | 18883 | 27924 | 44.96  | 23.00  |
| 50000 | 1.05 | 0.2500 | 0.7500 | 3125 | 19688 | 28125 | 17.05  | 0.2473 | 0.2527 | 0.7473 | 0.7527 | 3058 | 18615 | 28327 | 3192 | 18883 | 27924 | 64.67  | 37.11  |
| 50000 | 1.06 | 0.2500 | 0.7500 | 3125 | 19875 | 28125 | 24.41  | 0.2473 | 0.2527 | 0.7473 | 0.7527 | 3058 | 18615 | 28327 | 3192 | 18883 | 27924 | 88.17  | 54.93  |
| 50000 | 1.07 | 0.2500 | 0.7500 | 3125 | 20063 | 28125 | 33.03  | 0.2473 | 0.2527 | 0.7473 | 0.7527 | 3058 | 18615 | 28327 | 3192 | 18883 | 27924 | 115.43 | 76.49  |

|       |      |        |        |      |       |       |        |        |        |        |        |      |       |       |      |       |       |        |        |
|-------|------|--------|--------|------|-------|-------|--------|--------|--------|--------|--------|------|-------|-------|------|-------|-------|--------|--------|
| 50000 | 1.08 | 0.2500 | 0.7500 | 3125 | 20250 | 28125 | 42.88  | 0.2473 | 0.2527 | 0.7473 | 0.7527 | 3058 | 18615 | 28327 | 3192 | 18883 | 27924 | 146.48 | 101.76 |
| 50000 | 1.09 | 0.2500 | 0.7500 | 3125 | 20438 | 28125 | 53.96  | 0.2473 | 0.2527 | 0.7473 | 0.7527 | 3058 | 18615 | 28327 | 3192 | 18883 | 27924 | 181.31 | 130.76 |
| 50000 | 1.10 | 0.2500 | 0.7500 | 3125 | 20625 | 28125 | 66.24  | 0.2473 | 0.2527 | 0.7473 | 0.7527 | 3058 | 18615 | 28327 | 3192 | 18883 | 27924 | 219.91 | 163.48 |
| 50000 | 1.11 | 0.2500 | 0.7500 | 3125 | 20813 | 28125 | 79.70  | 0.2473 | 0.2527 | 0.7473 | 0.7527 | 3058 | 18615 | 28327 | 3192 | 18883 | 27924 | 262.28 | 199.93 |
| 50000 | 1.12 | 0.2500 | 0.7500 | 3125 | 21000 | 28125 | 94.32  | 0.2473 | 0.2527 | 0.7473 | 0.7527 | 3058 | 18615 | 28327 | 3192 | 18883 | 27924 | 308.44 | 240.10 |
| 50000 | 1.13 | 0.2500 | 0.7500 | 3125 | 21188 | 28125 | 110.08 | 0.2473 | 0.2527 | 0.7473 | 0.7527 | 3058 | 18615 | 28327 | 3192 | 18883 | 27924 | 358.37 | 283.99 |
| 50000 | 1.14 | 0.2500 | 0.7500 | 3125 | 21375 | 28125 | 126.96 | 0.2473 | 0.2527 | 0.7473 | 0.7527 | 3058 | 18615 | 28327 | 3192 | 18883 | 27924 | 412.08 | 331.61 |
| 50000 | 1.15 | 0.2500 | 0.7500 | 3125 | 21563 | 28125 | 144.95 | 0.2473 | 0.2527 | 0.7473 | 0.7527 | 3058 | 18615 | 28327 | 3192 | 18883 | 27924 | 469.57 | 382.95 |
| 50000 | 1.16 | 0.2500 | 0.7500 | 3125 | 21750 | 28125 | 164.03 | 0.2473 | 0.2527 | 0.7473 | 0.7527 | 3058 | 18615 | 28327 | 3192 | 18883 | 27924 | 530.83 | 438.01 |
| 50000 | 1.17 | 0.2500 | 0.7500 | 3125 | 21938 | 28125 | 184.18 | 0.2473 | 0.2527 | 0.7473 | 0.7527 | 3058 | 18615 | 28327 | 3192 | 18883 | 27924 | 595.87 | 496.80 |
| 50000 | 1.18 | 0.2500 | 0.7500 | 3125 | 22125 | 28125 | 205.39 | 0.2473 | 0.2527 | 0.7473 | 0.7527 | 3058 | 18615 | 28327 | 3192 | 18883 | 27924 | 664.69 | 559.31 |
| 50000 | 1.19 | 0.2500 | 0.7500 | 3125 | 22313 | 28125 | 227.63 | 0.2473 | 0.2527 | 0.7473 | 0.7527 | 3058 | 18615 | 28327 | 3192 | 18883 | 27924 | 737.29 | 625.54 |
| 50000 | 1.20 | 0.2500 | 0.7500 | 3125 | 22500 | 28125 | 250.91 | 0.2473 | 0.2527 | 0.7473 | 0.7527 | 3058 | 18615 | 28327 | 3192 | 18883 | 27924 | 813.66 | 695.50 |
| 50000 | 0.80 | 0.3000 | 0.7000 | 4500 | 16800 | 24500 | 400.55 | 0.2972 | 0.3028 | 0.6972 | 0.7028 | 4415 | 20886 | 24699 | 4586 | 21113 | 24302 | 802.45 | 884.21 |
| 50000 | 0.81 | 0.3000 | 0.7000 | 4500 | 17010 | 24500 | 359.00 | 0.2972 | 0.3028 | 0.6972 | 0.7028 | 4415 | 20886 | 24699 | 4586 | 21113 | 24302 | 722.40 | 800.51 |
| 50000 | 0.82 | 0.3000 | 0.7000 | 4500 | 17220 | 24500 | 320.00 | 0.2972 | 0.3028 | 0.6972 | 0.7028 | 4415 | 20886 | 24699 | 4586 | 21113 | 24302 | 646.57 | 720.98 |
| 50000 | 0.83 | 0.3000 | 0.7000 | 4500 | 17430 | 24500 | 283.50 | 0.2972 | 0.3028 | 0.6972 | 0.7028 | 4415 | 20886 | 24699 | 4586 | 21113 | 24302 | 574.97 | 645.63 |
| 50000 | 0.84 | 0.3000 | 0.7000 | 4500 | 17640 | 24500 | 249.44 | 0.2972 | 0.3028 | 0.6972 | 0.7028 | 4415 | 20886 | 24699 | 4586 | 21113 | 24302 | 507.59 | 574.45 |
| 50000 | 0.85 | 0.3000 | 0.7000 | 4500 | 17850 | 24500 | 217.78 | 0.2972 | 0.3028 | 0.6972 | 0.7028 | 4415 | 20886 | 24699 | 4586 | 21113 | 24302 | 444.44 | 507.46 |
| 50000 | 0.86 | 0.3000 | 0.7000 | 4500 | 18060 | 24500 | 188.46 | 0.2972 | 0.3028 | 0.6972 | 0.7028 | 4415 | 20886 | 24699 | 4586 | 21113 | 24302 | 385.50 | 444.64 |
| 50000 | 0.87 | 0.3000 | 0.7000 | 4500 | 18270 | 24500 | 161.44 | 0.2972 | 0.3028 | 0.6972 | 0.7028 | 4415 | 20886 | 24699 | 4586 | 21113 | 24302 | 330.80 | 386.00 |
| 50000 | 0.88 | 0.3000 | 0.7000 | 4500 | 18480 | 24500 | 136.67 | 0.2972 | 0.3028 | 0.6972 | 0.7028 | 4415 | 20886 | 24699 | 4586 | 21113 | 24302 | 280.31 | 331.53 |
| 50000 | 0.89 | 0.3000 | 0.7000 | 4500 | 18690 | 24500 | 114.11 | 0.2972 | 0.3028 | 0.6972 | 0.7028 | 4415 | 20886 | 24699 | 4586 | 21113 | 24302 | 234.04 | 281.25 |
| 50000 | 0.90 | 0.3000 | 0.7000 | 4500 | 18900 | 24500 | 93.71  | 0.2972 | 0.3028 | 0.6972 | 0.7028 | 4415 | 20886 | 24699 | 4586 | 21113 | 24302 | 192.00 | 235.14 |
| 50000 | 0.91 | 0.3000 | 0.7000 | 4500 | 19110 | 24500 | 75.43  | 0.2972 | 0.3028 | 0.6972 | 0.7028 | 4415 | 20886 | 24699 | 4586 | 21113 | 24302 | 154.19 | 193.21 |
| 50000 | 0.92 | 0.3000 | 0.7000 | 4500 | 19320 | 24500 | 59.22  | 0.2972 | 0.3028 | 0.6972 | 0.7028 | 4415 | 20886 | 24699 | 4586 | 21113 | 24302 | 120.59 | 155.46 |
| 50000 | 0.93 | 0.3000 | 0.7000 | 4500 | 19530 | 24500 | 45.06  | 0.2972 | 0.3028 | 0.6972 | 0.7028 | 4415 | 20886 | 24699 | 4586 | 21113 | 24302 | 91.22  | 121.88 |
| 50000 | 0.94 | 0.3000 | 0.7000 | 4500 | 19740 | 24500 | 32.91  | 0.2972 | 0.3028 | 0.6972 | 0.7028 | 4415 | 20886 | 24699 | 4586 | 21113 | 24302 | 66.07  | 92.48  |
| 50000 | 0.95 | 0.3000 | 0.7000 | 4500 | 19950 | 24500 | 22.71  | 0.2972 | 0.3028 | 0.6972 | 0.7028 | 4415 | 20886 | 24699 | 4586 | 21113 | 24302 | 45.15  | 67.26  |
| 50000 | 0.96 | 0.3000 | 0.7000 | 4500 | 20160 | 24500 | 14.45  | 0.2972 | 0.3028 | 0.6972 | 0.7028 | 4415 | 20886 | 24699 | 4586 | 21113 | 24302 | 28.44  | 46.22  |
| 50000 | 0.97 | 0.3000 | 0.7000 | 4500 | 20370 | 24500 | 8.08   | 0.2972 | 0.3028 | 0.6972 | 0.7028 | 4415 | 20886 | 24699 | 4586 | 21113 | 24302 | 15.96  | 29.35  |
| 50000 | 0.98 | 0.3000 | 0.7000 | 4500 | 20580 | 24500 | 3.57   | 0.2972 | 0.3028 | 0.6972 | 0.7028 | 4415 | 20886 | 24699 | 4586 | 21113 | 24302 | 7.71   | 16.66  |
| 50000 | 0.99 | 0.3000 | 0.7000 | 4500 | 20790 | 24500 | 0.89   | 0.2972 | 0.3028 | 0.6972 | 0.7028 | 4415 | 20886 | 24699 | 4586 | 21113 | 24302 | 3.67   | 8.15   |
| 50000 | 1.00 | 0.3000 | 0.7000 | 4500 | 21000 | 24500 | 0.00   | 0.2972 | 0.3028 | 0.6972 | 0.7028 | 4415 | 20886 | 24699 | 4586 | 21113 | 24302 | 3.86   | 3.82   |
| 50000 | 1.01 | 0.3000 | 0.7000 | 4500 | 21210 | 24500 | 0.88   | 0.2972 | 0.3028 | 0.6972 | 0.7028 | 4415 | 20886 | 24699 | 4586 | 21113 | 24302 | 8.28   | 3.67   |

|       |      |        |        |      |       |       |        |        |        |        |        |      |       |       |      |       |       |        |        |
|-------|------|--------|--------|------|-------|-------|--------|--------|--------|--------|--------|------|-------|-------|------|-------|-------|--------|--------|
| 50000 | 1.02 | 0.3000 | 0.7000 | 4500 | 21420 | 24500 | 3.49   | 0.2972 | 0.3028 | 0.6972 | 0.7028 | 4415 | 20886 | 24699 | 4586 | 21113 | 24302 | 16.91  | 7.69   |
| 50000 | 1.03 | 0.3000 | 0.7000 | 4500 | 21630 | 24500 | 7.80   | 0.2972 | 0.3028 | 0.6972 | 0.7028 | 4415 | 20886 | 24699 | 4586 | 21113 | 24302 | 29.77  | 15.89  |
| 50000 | 1.04 | 0.3000 | 0.7000 | 4500 | 21840 | 24500 | 13.79  | 0.2972 | 0.3028 | 0.6972 | 0.7028 | 4415 | 20886 | 24699 | 4586 | 21113 | 24302 | 46.85  | 28.27  |
| 50000 | 1.05 | 0.3000 | 0.7000 | 4500 | 22050 | 24500 | 21.43  | 0.2972 | 0.3028 | 0.6972 | 0.7028 | 4415 | 20886 | 24699 | 4586 | 21113 | 24302 | 68.15  | 44.82  |
| 50000 | 1.06 | 0.3000 | 0.7000 | 4500 | 22260 | 24500 | 30.69  | 0.2972 | 0.3028 | 0.6972 | 0.7028 | 4415 | 20886 | 24699 | 4586 | 21113 | 24302 | 93.68  | 65.55  |
| 50000 | 1.07 | 0.3000 | 0.7000 | 4500 | 22470 | 24500 | 41.55  | 0.2972 | 0.3028 | 0.6972 | 0.7028 | 4415 | 20886 | 24699 | 4586 | 21113 | 24302 | 123.43 | 90.46  |
| 50000 | 1.08 | 0.3000 | 0.7000 | 4500 | 22680 | 24500 | 53.97  | 0.2972 | 0.3028 | 0.6972 | 0.7028 | 4415 | 20886 | 24699 | 4586 | 21113 | 24302 | 157.41 | 119.55 |
| 50000 | 1.09 | 0.3000 | 0.7000 | 4500 | 22890 | 24500 | 67.93  | 0.2972 | 0.3028 | 0.6972 | 0.7028 | 4415 | 20886 | 24699 | 4586 | 21113 | 24302 | 195.60 | 152.82 |
| 50000 | 1.10 | 0.3000 | 0.7000 | 4500 | 23100 | 24500 | 83.42  | 0.2972 | 0.3028 | 0.6972 | 0.7028 | 4415 | 20886 | 24699 | 4586 | 21113 | 24302 | 238.02 | 190.26 |
| 50000 | 1.11 | 0.3000 | 0.7000 | 4500 | 23310 | 24500 | 100.40 | 0.2972 | 0.3028 | 0.6972 | 0.7028 | 4415 | 20886 | 24699 | 4586 | 21113 | 24302 | 284.66 | 231.88 |
| 50000 | 1.12 | 0.3000 | 0.7000 | 4500 | 23520 | 24500 | 118.86 | 0.2972 | 0.3028 | 0.6972 | 0.7028 | 4415 | 20886 | 24699 | 4586 | 21113 | 24302 | 335.53 | 277.68 |
| 50000 | 1.13 | 0.3000 | 0.7000 | 4500 | 23730 | 24500 | 138.76 | 0.2972 | 0.3028 | 0.6972 | 0.7028 | 4415 | 20886 | 24699 | 4586 | 21113 | 24302 | 390.62 | 327.65 |
| 50000 | 1.14 | 0.3000 | 0.7000 | 4500 | 23940 | 24500 | 160.09 | 0.2972 | 0.3028 | 0.6972 | 0.7028 | 4415 | 20886 | 24699 | 4586 | 21113 | 24302 | 449.93 | 381.81 |
| 50000 | 1.15 | 0.3000 | 0.7000 | 4500 | 24150 | 24500 | 182.83 | 0.2972 | 0.3028 | 0.6972 | 0.7028 | 4415 | 20886 | 24699 | 4586 | 21113 | 24302 | 513.47 | 440.14 |
| 50000 | 1.16 | 0.3000 | 0.7000 | 4500 | 24360 | 24500 | 206.95 | 0.2972 | 0.3028 | 0.6972 | 0.7028 | 4415 | 20886 | 24699 | 4586 | 21113 | 24302 | 581.22 | 502.64 |
| 50000 | 1.17 | 0.3000 | 0.7000 | 4500 | 24570 | 24500 | 232.44 | 0.2972 | 0.3028 | 0.6972 | 0.7028 | 4415 | 20886 | 24699 | 4586 | 21113 | 24302 | 653.20 | 569.33 |
| 50000 | 1.18 | 0.3000 | 0.7000 | 4500 | 24780 | 24500 | 259.27 | 0.2972 | 0.3028 | 0.6972 | 0.7028 | 4415 | 20886 | 24699 | 4586 | 21113 | 24302 | 729.41 | 640.19 |
| 50000 | 1.19 | 0.3000 | 0.7000 | 4500 | 24990 | 24500 | 287.43 | 0.2972 | 0.3028 | 0.6972 | 0.7028 | 4415 | 20886 | 24699 | 4586 | 21113 | 24302 | 809.83 | 715.23 |
| 50000 | 1.20 | 0.3000 | 0.7000 | 4500 | 25200 | 24500 | 316.90 | 0.2972 | 0.3028 | 0.6972 | 0.7028 | 4415 | 20886 | 24699 | 4586 | 21113 | 24302 | 894.48 | 794.45 |
| 50000 | 0.80 | 0.3500 | 0.6500 | 6125 | 18200 | 21125 | 465.69 | 0.3470 | 0.3530 | 0.6470 | 0.6530 | 6022 | 22660 | 21318 | 6229 | 22838 | 20933 | 881.49 | 945.32 |
| 50000 | 0.81 | 0.3500 | 0.6500 | 6125 | 18428 | 21125 | 417.64 | 0.3470 | 0.3530 | 0.6470 | 0.6530 | 6022 | 22660 | 21318 | 6229 | 22838 | 20933 | 794.21 | 855.19 |
| 50000 | 0.82 | 0.3500 | 0.6500 | 6125 | 18655 | 21125 | 372.49 | 0.3470 | 0.3530 | 0.6470 | 0.6530 | 6022 | 22660 | 21318 | 6229 | 22838 | 20933 | 711.50 | 769.58 |
| 50000 | 0.83 | 0.3500 | 0.6500 | 6125 | 18883 | 21125 | 330.19 | 0.3470 | 0.3530 | 0.6470 | 0.6530 | 6022 | 22660 | 21318 | 6229 | 22838 | 20933 | 633.36 | 688.52 |
| 50000 | 0.84 | 0.3500 | 0.6500 | 6125 | 19110 | 21125 | 290.68 | 0.3470 | 0.3530 | 0.6470 | 0.6530 | 6022 | 22660 | 21318 | 6229 | 22838 | 20933 | 559.79 | 611.98 |
| 50000 | 0.85 | 0.3500 | 0.6500 | 6125 | 19338 | 21125 | 253.92 | 0.3470 | 0.3530 | 0.6470 | 0.6530 | 6022 | 22660 | 21318 | 6229 | 22838 | 20933 | 490.78 | 539.98 |
| 50000 | 0.86 | 0.3500 | 0.6500 | 6125 | 19565 | 21125 | 219.86 | 0.3470 | 0.3530 | 0.6470 | 0.6530 | 6022 | 22660 | 21318 | 6229 | 22838 | 20933 | 426.34 | 472.51 |
| 50000 | 0.87 | 0.3500 | 0.6500 | 6125 | 19793 | 21125 | 188.43 | 0.3470 | 0.3530 | 0.6470 | 0.6530 | 6022 | 22660 | 21318 | 6229 | 22838 | 20933 | 366.47 | 409.57 |
| 50000 | 0.88 | 0.3500 | 0.6500 | 6125 | 20020 | 21125 | 159.60 | 0.3470 | 0.3530 | 0.6470 | 0.6530 | 6022 | 22660 | 21318 | 6229 | 22838 | 20933 | 311.17 | 351.16 |
| 50000 | 0.89 | 0.3500 | 0.6500 | 6125 | 20248 | 21125 | 133.32 | 0.3470 | 0.3530 | 0.6470 | 0.6530 | 6022 | 22660 | 21318 | 6229 | 22838 | 20933 | 260.44 | 297.29 |
| 50000 | 0.90 | 0.3500 | 0.6500 | 6125 | 20475 | 21125 | 109.53 | 0.3470 | 0.3530 | 0.6470 | 0.6530 | 6022 | 22660 | 21318 | 6229 | 22838 | 20933 | 214.27 | 247.95 |
| 50000 | 0.91 | 0.3500 | 0.6500 | 6125 | 20703 | 21125 | 88.20  | 0.3470 | 0.3530 | 0.6470 | 0.6530 | 6022 | 22660 | 21318 | 6229 | 22838 | 20933 | 172.68 | 203.14 |
| 50000 | 0.92 | 0.3500 | 0.6500 | 6125 | 20930 | 21125 | 69.29  | 0.3470 | 0.3530 | 0.6470 | 0.6530 | 6022 | 22660 | 21318 | 6229 | 22838 | 20933 | 135.65 | 162.86 |
| 50000 | 0.93 | 0.3500 | 0.6500 | 6125 | 21158 | 21125 | 52.74  | 0.3470 | 0.3530 | 0.6470 | 0.6530 | 6022 | 22660 | 21318 | 6229 | 22838 | 20933 | 103.18 | 127.12 |
| 50000 | 0.94 | 0.3500 | 0.6500 | 6125 | 21385 | 21125 | 38.53  | 0.3470 | 0.3530 | 0.6470 | 0.6530 | 6022 | 22660 | 21318 | 6229 | 22838 | 20933 | 75.29  | 95.91  |
| 50000 | 0.95 | 0.3500 | 0.6500 | 6125 | 21613 | 21125 | 26.61  | 0.3470 | 0.3530 | 0.6470 | 0.6530 | 6022 | 22660 | 21318 | 6229 | 22838 | 20933 | 51.96  | 69.23  |

|       |      |        |        |      |       |       |        |        |        |        |        |      |       |       |      |       |       |        |        |
|-------|------|--------|--------|------|-------|-------|--------|--------|--------|--------|--------|------|-------|-------|------|-------|-------|--------|--------|
| 50000 | 0.96 | 0.3500 | 0.6500 | 6125 | 21840 | 21125 | 16.93  | 0.3470 | 0.3530 | 0.6470 | 0.6530 | 6022 | 22660 | 21318 | 6229 | 22838 | 20933 | 33.21  | 47.09  |
| 50000 | 0.97 | 0.3500 | 0.6500 | 6125 | 22068 | 21125 | 9.47   | 0.3470 | 0.3530 | 0.6470 | 0.6530 | 6022 | 22660 | 21318 | 6229 | 22838 | 20933 | 19.02  | 29.47  |
| 50000 | 0.98 | 0.3500 | 0.6500 | 6125 | 22295 | 21125 | 4.19   | 0.3470 | 0.3530 | 0.6470 | 0.6530 | 6022 | 22660 | 21318 | 6229 | 22838 | 20933 | 9.40   | 16.39  |
| 50000 | 0.99 | 0.3500 | 0.6500 | 6125 | 22523 | 21125 | 1.04   | 0.3470 | 0.3530 | 0.6470 | 0.6530 | 6022 | 22660 | 21318 | 6229 | 22838 | 20933 | 4.34   | 7.84   |
| 50000 | 1.00 | 0.3500 | 0.6500 | 6125 | 22750 | 21125 | 0.00   | 0.3470 | 0.3530 | 0.6470 | 0.6530 | 6022 | 22660 | 21318 | 6229 | 22838 | 20933 | 3.86   | 3.83   |
| 50000 | 1.01 | 0.3500 | 0.6500 | 6125 | 22978 | 21125 | 1.03   | 0.3470 | 0.3530 | 0.6470 | 0.6530 | 6022 | 22660 | 21318 | 6229 | 22838 | 20933 | 7.94   | 4.34   |
| 50000 | 1.02 | 0.3500 | 0.6500 | 6125 | 23205 | 21125 | 4.10   | 0.3470 | 0.3530 | 0.6470 | 0.6530 | 6022 | 22660 | 21318 | 6229 | 22838 | 20933 | 16.59  | 9.39   |
| 50000 | 1.03 | 0.3500 | 0.6500 | 6125 | 23433 | 21125 | 9.17   | 0.3470 | 0.3530 | 0.6470 | 0.6530 | 6022 | 22660 | 21318 | 6229 | 22838 | 20933 | 29.81  | 18.97  |
| 50000 | 1.04 | 0.3500 | 0.6500 | 6125 | 23660 | 21125 | 16.21  | 0.3470 | 0.3530 | 0.6470 | 0.6530 | 6022 | 22660 | 21318 | 6229 | 22838 | 20933 | 47.59  | 33.09  |
| 50000 | 1.05 | 0.3500 | 0.6500 | 6125 | 23888 | 21125 | 25.19  | 0.3470 | 0.3530 | 0.6470 | 0.6530 | 6022 | 22660 | 21318 | 6229 | 22838 | 20933 | 69.95  | 51.74  |
| 50000 | 1.06 | 0.3500 | 0.6500 | 6125 | 24115 | 21125 | 36.09  | 0.3470 | 0.3530 | 0.6470 | 0.6530 | 6022 | 22660 | 21318 | 6229 | 22838 | 20933 | 96.87  | 74.91  |
| 50000 | 1.07 | 0.3500 | 0.6500 | 6125 | 24343 | 21125 | 48.87  | 0.3470 | 0.3530 | 0.6470 | 0.6530 | 6022 | 22660 | 21318 | 6229 | 22838 | 20933 | 128.36 | 102.63 |
| 50000 | 1.08 | 0.3500 | 0.6500 | 6125 | 24570 | 21125 | 63.50  | 0.3470 | 0.3530 | 0.6470 | 0.6530 | 6022 | 22660 | 21318 | 6229 | 22838 | 20933 | 164.42 | 134.87 |
| 50000 | 1.09 | 0.3500 | 0.6500 | 6125 | 24798 | 21125 | 79.95  | 0.3470 | 0.3530 | 0.6470 | 0.6530 | 6022 | 22660 | 21318 | 6229 | 22838 | 20933 | 205.05 | 171.65 |
| 50000 | 1.10 | 0.3500 | 0.6500 | 6125 | 25025 | 21125 | 98.20  | 0.3470 | 0.3530 | 0.6470 | 0.6530 | 6022 | 22660 | 21318 | 6229 | 22838 | 20933 | 250.24 | 212.96 |
| 50000 | 1.11 | 0.3500 | 0.6500 | 6125 | 25253 | 21125 | 118.22 | 0.3470 | 0.3530 | 0.6470 | 0.6530 | 6022 | 22660 | 21318 | 6229 | 22838 | 20933 | 300.00 | 258.80 |
| 50000 | 1.12 | 0.3500 | 0.6500 | 6125 | 25480 | 21125 | 139.99 | 0.3470 | 0.3530 | 0.6470 | 0.6530 | 6022 | 22660 | 21318 | 6229 | 22838 | 20933 | 354.33 | 309.17 |
| 50000 | 1.13 | 0.3500 | 0.6500 | 6125 | 25708 | 21125 | 163.47 | 0.3470 | 0.3530 | 0.6470 | 0.6530 | 6022 | 22660 | 21318 | 6229 | 22838 | 20933 | 413.23 | 364.08 |
| 50000 | 1.14 | 0.3500 | 0.6500 | 6125 | 25935 | 21125 | 188.64 | 0.3470 | 0.3530 | 0.6470 | 0.6530 | 6022 | 22660 | 21318 | 6229 | 22838 | 20933 | 476.70 | 423.52 |
| 50000 | 1.15 | 0.3500 | 0.6500 | 6125 | 26163 | 21125 | 215.48 | 0.3470 | 0.3530 | 0.6470 | 0.6530 | 6022 | 22660 | 21318 | 6229 | 22838 | 20933 | 544.73 | 487.49 |
| 50000 | 1.16 | 0.3500 | 0.6500 | 6125 | 26390 | 21125 | 243.97 | 0.3470 | 0.3530 | 0.6470 | 0.6530 | 6022 | 22660 | 21318 | 6229 | 22838 | 20933 | 617.33 | 555.99 |
| 50000 | 1.17 | 0.3500 | 0.6500 | 6125 | 26618 | 21125 | 274.07 | 0.3470 | 0.3530 | 0.6470 | 0.6530 | 6022 | 22660 | 21318 | 6229 | 22838 | 20933 | 694.50 | 629.03 |
| 50000 | 1.18 | 0.3500 | 0.6500 | 6125 | 26845 | 21125 | 305.78 | 0.3470 | 0.3530 | 0.6470 | 0.6530 | 6022 | 22660 | 21318 | 6229 | 22838 | 20933 | 776.24 | 706.60 |
| 50000 | 1.19 | 0.3500 | 0.6500 | 6125 | 27073 | 21125 | 339.05 | 0.3470 | 0.3530 | 0.6470 | 0.6530 | 6022 | 22660 | 21318 | 6229 | 22838 | 20933 | 862.55 | 788.70 |
| 50000 | 1.20 | 0.3500 | 0.6500 | 6125 | 27300 | 21125 | 373.89 | 0.3470 | 0.3530 | 0.6470 | 0.6530 | 6022 | 22660 | 21318 | 6229 | 22838 | 20933 | 953.42 | 875.34 |
| 50000 | 0.80 | 0.4000 | 0.6000 | 8000 | 19200 | 18000 | 514.78 | 0.3970 | 0.4030 | 0.5970 | 0.6030 | 7879 | 23938 | 18183 | 8122 | 24060 | 17818 | 941.60 | 985.31 |
| 50000 | 0.81 | 0.4000 | 0.6000 | 8000 | 19440 | 18000 | 461.86 | 0.3970 | 0.4030 | 0.5970 | 0.6030 | 7879 | 23938 | 18183 | 8122 | 24060 | 17818 | 849.00 | 890.75 |
| 50000 | 0.82 | 0.4000 | 0.6000 | 8000 | 19680 | 18000 | 412.11 | 0.3970 | 0.4030 | 0.5970 | 0.6030 | 7879 | 23938 | 18183 | 8122 | 24060 | 17818 | 761.20 | 800.98 |
| 50000 | 0.83 | 0.4000 | 0.6000 | 8000 | 19920 | 18000 | 365.46 | 0.3970 | 0.4030 | 0.5970 | 0.6030 | 7879 | 23938 | 18183 | 8122 | 24060 | 17818 | 678.22 | 715.99 |
| 50000 | 0.84 | 0.4000 | 0.6000 | 8000 | 20160 | 18000 | 321.87 | 0.3970 | 0.4030 | 0.5970 | 0.6030 | 7879 | 23938 | 18183 | 8122 | 24060 | 17818 | 600.05 | 635.80 |
| 50000 | 0.85 | 0.4000 | 0.6000 | 8000 | 20400 | 18000 | 281.27 | 0.3970 | 0.4030 | 0.5970 | 0.6030 | 7879 | 23938 | 18183 | 8122 | 24060 | 17818 | 526.70 | 560.39 |
| 50000 | 0.86 | 0.4000 | 0.6000 | 8000 | 20640 | 18000 | 243.63 | 0.3970 | 0.4030 | 0.5970 | 0.6030 | 7879 | 23938 | 18183 | 8122 | 24060 | 17818 | 458.16 | 489.77 |
| 50000 | 0.87 | 0.4000 | 0.6000 | 8000 | 20880 | 18000 | 208.88 | 0.3970 | 0.4030 | 0.5970 | 0.6030 | 7879 | 23938 | 18183 | 8122 | 24060 | 17818 | 394.43 | 423.93 |
| 50000 | 0.88 | 0.4000 | 0.6000 | 8000 | 21120 | 18000 | 176.98 | 0.3970 | 0.4030 | 0.5970 | 0.6030 | 7879 | 23938 | 18183 | 8122 | 24060 | 17818 | 335.51 | 362.89 |
| 50000 | 0.89 | 0.4000 | 0.6000 | 8000 | 21360 | 18000 | 147.89 | 0.3970 | 0.4030 | 0.5970 | 0.6030 | 7879 | 23938 | 18183 | 8122 | 24060 | 17818 | 281.40 | 306.63 |

|       |      |        |        |       |       |       |        |        |        |        |        |      |       |       |       |       |       |        |         |
|-------|------|--------|--------|-------|-------|-------|--------|--------|--------|--------|--------|------|-------|-------|-------|-------|-------|--------|---------|
| 50000 | 0.90 | 0.4000 | 0.6000 | 8000  | 21600 | 18000 | 121.55 | 0.3970 | 0.4030 | 0.5970 | 0.6030 | 7879 | 23938 | 18183 | 8122  | 24060 | 17818 | 232.11 | 255.17  |
| 50000 | 0.91 | 0.4000 | 0.6000 | 8000  | 21840 | 18000 | 97.91  | 0.3970 | 0.4030 | 0.5970 | 0.6030 | 7879 | 23938 | 18183 | 8122  | 24060 | 17818 | 187.63 | 208.49  |
| 50000 | 0.92 | 0.4000 | 0.6000 | 8000  | 22080 | 18000 | 76.94  | 0.3970 | 0.4030 | 0.5970 | 0.6030 | 7879 | 23938 | 18183 | 8122  | 24060 | 17818 | 147.96 | 166.60  |
| 50000 | 0.93 | 0.4000 | 0.6000 | 8000  | 22320 | 18000 | 58.59  | 0.3970 | 0.4030 | 0.5970 | 0.6030 | 7879 | 23938 | 18183 | 8122  | 24060 | 17818 | 113.10 | 129.49  |
| 50000 | 0.94 | 0.4000 | 0.6000 | 8000  | 22560 | 18000 | 42.81  | 0.3970 | 0.4030 | 0.5970 | 0.6030 | 7879 | 23938 | 18183 | 8122  | 24060 | 17818 | 83.06  | 97.18   |
| 50000 | 0.95 | 0.4000 | 0.6000 | 8000  | 22800 | 18000 | 29.57  | 0.3970 | 0.4030 | 0.5970 | 0.6030 | 7879 | 23938 | 18183 | 8122  | 24060 | 17818 | 57.83  | 69.65   |
| 50000 | 0.96 | 0.4000 | 0.6000 | 8000  | 23040 | 18000 | 18.82  | 0.3970 | 0.4030 | 0.5970 | 0.6030 | 7879 | 23938 | 18183 | 8122  | 24060 | 17818 | 37.41  | 46.91   |
| 50000 | 0.97 | 0.4000 | 0.6000 | 8000  | 23280 | 18000 | 10.53  | 0.3970 | 0.4030 | 0.5970 | 0.6030 | 7879 | 23938 | 18183 | 8122  | 24060 | 17818 | 21.80  | 28.96   |
| 50000 | 0.98 | 0.4000 | 0.6000 | 8000  | 23520 | 18000 | 4.66   | 0.3970 | 0.4030 | 0.5970 | 0.6030 | 7879 | 23938 | 18183 | 8122  | 24060 | 17818 | 11.00  | 15.79   |
| 50000 | 0.99 | 0.4000 | 0.6000 | 8000  | 23760 | 18000 | 1.16   | 0.3970 | 0.4030 | 0.5970 | 0.6030 | 7879 | 23938 | 18183 | 8122  | 24060 | 17818 | 5.02   | 7.42    |
| 50000 | 1.00 | 0.4000 | 0.6000 | 8000  | 24000 | 18000 | 0.00   | 0.3970 | 0.4030 | 0.5970 | 0.6030 | 7879 | 23938 | 18183 | 8122  | 24060 | 17818 | 3.85   | 3.83    |
| 50000 | 1.01 | 0.4000 | 0.6000 | 8000  | 24240 | 18000 | 1.15   | 0.3970 | 0.4030 | 0.5970 | 0.6030 | 7879 | 23938 | 18183 | 8122  | 24060 | 17818 | 7.49   | 5.03    |
| 50000 | 1.02 | 0.4000 | 0.6000 | 8000  | 24480 | 18000 | 4.56   | 0.3970 | 0.4030 | 0.5970 | 0.6030 | 7879 | 23938 | 18183 | 8122  | 24060 | 17818 | 15.95  | 11.02   |
| 50000 | 1.03 | 0.4000 | 0.6000 | 8000  | 24720 | 18000 | 10.21  | 0.3970 | 0.4030 | 0.5970 | 0.6030 | 7879 | 23938 | 18183 | 8122  | 24060 | 17818 | 29.22  | 21.80   |
| 50000 | 1.04 | 0.4000 | 0.6000 | 8000  | 24960 | 18000 | 18.06  | 0.3970 | 0.4030 | 0.5970 | 0.6030 | 7879 | 23938 | 18183 | 8122  | 24060 | 17818 | 47.30  | 37.36   |
| 50000 | 1.05 | 0.4000 | 0.6000 | 8000  | 25200 | 18000 | 28.07  | 0.3970 | 0.4030 | 0.5970 | 0.6030 | 7879 | 23938 | 18183 | 8122  | 24060 | 17818 | 70.19  | 57.72   |
| 50000 | 1.06 | 0.4000 | 0.6000 | 8000  | 25440 | 18000 | 40.22  | 0.3970 | 0.4030 | 0.5970 | 0.6030 | 7879 | 23938 | 18183 | 8122  | 24060 | 17818 | 97.89  | 82.86   |
| 50000 | 1.07 | 0.4000 | 0.6000 | 8000  | 25680 | 18000 | 54.47  | 0.3970 | 0.4030 | 0.5970 | 0.6030 | 7879 | 23938 | 18183 | 8122  | 24060 | 17818 | 130.41 | 112.79  |
| 50000 | 1.08 | 0.4000 | 0.6000 | 8000  | 25920 | 18000 | 70.79  | 0.3970 | 0.4030 | 0.5970 | 0.6030 | 7879 | 23938 | 18183 | 8122  | 24060 | 17818 | 167.74 | 147.51  |
| 50000 | 1.09 | 0.4000 | 0.6000 | 8000  | 26160 | 18000 | 89.15  | 0.3970 | 0.4030 | 0.5970 | 0.6030 | 7879 | 23938 | 18183 | 8122  | 24060 | 17818 | 209.88 | 187.01  |
| 50000 | 1.10 | 0.4000 | 0.6000 | 8000  | 26400 | 18000 | 109.53 | 0.3970 | 0.4030 | 0.5970 | 0.6030 | 7879 | 23938 | 18183 | 8122  | 24060 | 17818 | 256.83 | 231.30  |
| 50000 | 1.11 | 0.4000 | 0.6000 | 8000  | 26640 | 18000 | 131.88 | 0.3970 | 0.4030 | 0.5970 | 0.6030 | 7879 | 23938 | 18183 | 8122  | 24060 | 17818 | 308.60 | 280.39  |
| 50000 | 1.12 | 0.4000 | 0.6000 | 8000  | 26880 | 18000 | 156.18 | 0.3970 | 0.4030 | 0.5970 | 0.6030 | 7879 | 23938 | 18183 | 8122  | 24060 | 17818 | 365.18 | 334.26  |
| 50000 | 1.13 | 0.4000 | 0.6000 | 8000  | 27120 | 18000 | 182.41 | 0.3970 | 0.4030 | 0.5970 | 0.6030 | 7879 | 23938 | 18183 | 8122  | 24060 | 17818 | 426.57 | 392.91  |
| 50000 | 1.14 | 0.4000 | 0.6000 | 8000  | 27360 | 18000 | 210.54 | 0.3970 | 0.4030 | 0.5970 | 0.6030 | 7879 | 23938 | 18183 | 8122  | 24060 | 17818 | 492.77 | 456.36  |
| 50000 | 1.15 | 0.4000 | 0.6000 | 8000  | 27600 | 18000 | 240.54 | 0.3970 | 0.4030 | 0.5970 | 0.6030 | 7879 | 23938 | 18183 | 8122  | 24060 | 17818 | 563.79 | 524.59  |
| 50000 | 1.16 | 0.4000 | 0.6000 | 8000  | 27840 | 18000 | 272.38 | 0.3970 | 0.4030 | 0.5970 | 0.6030 | 7879 | 23938 | 18183 | 8122  | 24060 | 17818 | 639.61 | 597.61  |
| 50000 | 1.17 | 0.4000 | 0.6000 | 8000  | 28080 | 18000 | 306.03 | 0.3970 | 0.4030 | 0.5970 | 0.6030 | 7879 | 23938 | 18183 | 8122  | 24060 | 17818 | 720.25 | 675.42  |
| 50000 | 1.18 | 0.4000 | 0.6000 | 8000  | 28320 | 18000 | 341.48 | 0.3970 | 0.4030 | 0.5970 | 0.6030 | 7879 | 23938 | 18183 | 8122  | 24060 | 17818 | 805.71 | 758.02  |
| 50000 | 1.19 | 0.4000 | 0.6000 | 8000  | 28560 | 18000 | 378.70 | 0.3970 | 0.4030 | 0.5970 | 0.6030 | 7879 | 23938 | 18183 | 8122  | 24060 | 17818 | 895.97 | 845.41  |
| 50000 | 1.20 | 0.4000 | 0.6000 | 8000  | 28800 | 18000 | 417.66 | 0.3970 | 0.4030 | 0.5970 | 0.6030 | 7879 | 23938 | 18183 | 8122  | 24060 | 17818 | 991.05 | 937.58  |
| 50000 | 0.80 | 0.4500 | 0.5500 | 10125 | 19800 | 15125 | 545.24 | 0.4469 | 0.4531 | 0.5469 | 0.5531 | 9987 | 24718 | 15295 | 10264 | 24780 | 14956 | 982.39 | 1004.58 |
| 50000 | 0.81 | 0.4500 | 0.5500 | 10125 | 20048 | 15125 | 489.32 | 0.4469 | 0.4531 | 0.5469 | 0.5531 | 9987 | 24718 | 15295 | 10264 | 24780 | 14956 | 886.38 | 907.58  |
| 50000 | 0.82 | 0.4500 | 0.5500 | 10125 | 20295 | 15125 | 436.72 | 0.4469 | 0.4531 | 0.5469 | 0.5531 | 9987 | 24718 | 15295 | 10264 | 24780 | 14956 | 795.32 | 815.52  |
| 50000 | 0.83 | 0.4500 | 0.5500 | 10125 | 20543 | 15125 | 387.38 | 0.4469 | 0.4531 | 0.5469 | 0.5531 | 9987 | 24718 | 15295 | 10264 | 24780 | 14956 | 709.22 | 728.40  |



|       |      |        |        |       |       |       |        |        |        |        |        |      |       |       |       |       |       |        |        |
|-------|------|--------|--------|-------|-------|-------|--------|--------|--------|--------|--------|------|-------|-------|-------|-------|-------|--------|--------|
| 50000 | 0.84 | 0.4500 | 0.5500 | 10125 | 20790 | 15125 | 341.25 | 0.4469 | 0.4531 | 0.5469 | 0.5531 | 9987 | 24718 | 15295 | 10264 | 24780 | 14956 | 628.08 | 646.22 |
| 50000 | 0.85 | 0.4500 | 0.5500 | 10125 | 21038 | 15125 | 298.28 | 0.4469 | 0.4531 | 0.5469 | 0.5531 | 9987 | 24718 | 15295 | 10264 | 24780 | 14956 | 551.89 | 568.99 |
| 50000 | 0.86 | 0.4500 | 0.5500 | 10125 | 21285 | 15125 | 258.42 | 0.4469 | 0.4531 | 0.5469 | 0.5531 | 9987 | 24718 | 15295 | 10264 | 24780 | 14956 | 480.66 | 496.71 |
| 50000 | 0.87 | 0.4500 | 0.5500 | 10125 | 21533 | 15125 | 221.62 | 0.4469 | 0.4531 | 0.5469 | 0.5531 | 9987 | 24718 | 15295 | 10264 | 24780 | 14956 | 414.38 | 429.37 |
| 50000 | 0.88 | 0.4500 | 0.5500 | 10125 | 21780 | 15125 | 187.81 | 0.4469 | 0.4531 | 0.5469 | 0.5531 | 9987 | 24718 | 15295 | 10264 | 24780 | 14956 | 353.07 | 366.97 |
| 50000 | 0.89 | 0.4500 | 0.5500 | 10125 | 22028 | 15125 | 156.97 | 0.4469 | 0.4531 | 0.5469 | 0.5531 | 9987 | 24718 | 15295 | 10264 | 24780 | 14956 | 296.70 | 309.52 |
| 50000 | 0.90 | 0.4500 | 0.5500 | 10125 | 22275 | 15125 | 129.04 | 0.4469 | 0.4531 | 0.5469 | 0.5531 | 9987 | 24718 | 15295 | 10264 | 24780 | 14956 | 245.30 | 257.01 |
| 50000 | 0.91 | 0.4500 | 0.5500 | 10125 | 22523 | 15125 | 103.96 | 0.4469 | 0.4531 | 0.5469 | 0.5531 | 9987 | 24718 | 15295 | 10264 | 24780 | 14956 | 198.85 | 209.44 |
| 50000 | 0.92 | 0.4500 | 0.5500 | 10125 | 22770 | 15125 | 81.71  | 0.4469 | 0.4531 | 0.5469 | 0.5531 | 9987 | 24718 | 15295 | 10264 | 24780 | 14956 | 157.36 | 166.82 |
| 50000 | 0.93 | 0.4500 | 0.5500 | 10125 | 23018 | 15125 | 62.23  | 0.4469 | 0.4531 | 0.5469 | 0.5531 | 9987 | 24718 | 15295 | 10264 | 24780 | 14956 | 120.82 | 129.14 |
| 50000 | 0.94 | 0.4500 | 0.5500 | 10125 | 23265 | 15125 | 45.48  | 0.4469 | 0.4531 | 0.5469 | 0.5531 | 9987 | 24718 | 15295 | 10264 | 24780 | 14956 | 89.24  | 96.41  |
| 50000 | 0.95 | 0.4500 | 0.5500 | 10125 | 23513 | 15125 | 31.42  | 0.4469 | 0.4531 | 0.5469 | 0.5531 | 9987 | 24718 | 15295 | 10264 | 24780 | 14956 | 62.62  | 68.62  |
| 50000 | 0.96 | 0.4500 | 0.5500 | 10125 | 23760 | 15125 | 20.01  | 0.4469 | 0.4531 | 0.5469 | 0.5531 | 9987 | 24718 | 15295 | 10264 | 24780 | 14956 | 40.95  | 45.78  |
| 50000 | 0.97 | 0.4500 | 0.5500 | 10125 | 24008 | 15125 | 11.20  | 0.4469 | 0.4531 | 0.5469 | 0.5531 | 9987 | 24718 | 15295 | 10264 | 24780 | 14956 | 24.24  | 27.88  |
| 50000 | 0.98 | 0.4500 | 0.5500 | 10125 | 24255 | 15125 | 4.95   | 0.4469 | 0.4531 | 0.5469 | 0.5531 | 9987 | 24718 | 15295 | 10264 | 24780 | 14956 | 12.49  | 14.92  |
| 50000 | 0.99 | 0.4500 | 0.5500 | 10125 | 24503 | 15125 | 1.23   | 0.4469 | 0.4531 | 0.5469 | 0.5531 | 9987 | 24718 | 15295 | 10264 | 24780 | 14956 | 5.69   | 6.91   |
| 50000 | 1.00 | 0.4500 | 0.5500 | 10125 | 24750 | 15125 | 0.00   | 0.4469 | 0.4531 | 0.5469 | 0.5531 | 9987 | 24718 | 15295 | 10264 | 24780 | 14956 | 3.85   | 3.84   |
| 50000 | 1.01 | 0.4500 | 0.5500 | 10125 | 24998 | 15125 | 1.22   | 0.4469 | 0.4531 | 0.5469 | 0.5531 | 9987 | 24718 | 15295 | 10264 | 24780 | 14956 | 6.96   | 5.71   |
| 50000 | 1.02 | 0.4500 | 0.5500 | 10125 | 25245 | 15125 | 4.85   | 0.4469 | 0.4531 | 0.5469 | 0.5531 | 9987 | 24718 | 15295 | 10264 | 24780 | 14956 | 15.03  | 12.53  |
| 50000 | 1.03 | 0.4500 | 0.5500 | 10125 | 25493 | 15125 | 10.86  | 0.4469 | 0.4531 | 0.5469 | 0.5531 | 9987 | 24718 | 15295 | 10264 | 24780 | 14956 | 28.06  | 24.29  |
| 50000 | 1.04 | 0.4500 | 0.5500 | 10125 | 25740 | 15125 | 19.21  | 0.4469 | 0.4531 | 0.5469 | 0.5531 | 9987 | 24718 | 15295 | 10264 | 24780 | 14956 | 46.04  | 41.00  |
| 50000 | 1.05 | 0.4500 | 0.5500 | 10125 | 25988 | 15125 | 29.87  | 0.4469 | 0.4531 | 0.5469 | 0.5531 | 9987 | 24718 | 15295 | 10264 | 24780 | 14956 | 68.98  | 62.65  |
| 50000 | 1.06 | 0.4500 | 0.5500 | 10125 | 26235 | 15125 | 42.81  | 0.4469 | 0.4531 | 0.5469 | 0.5531 | 9987 | 24718 | 15295 | 10264 | 24780 | 14956 | 96.88  | 89.25  |
| 50000 | 1.07 | 0.4500 | 0.5500 | 10125 | 26483 | 15125 | 57.98  | 0.4469 | 0.4531 | 0.5469 | 0.5531 | 9987 | 24718 | 15295 | 10264 | 24780 | 14956 | 129.73 | 120.79 |
| 50000 | 1.08 | 0.4500 | 0.5500 | 10125 | 26730 | 15125 | 75.37  | 0.4469 | 0.4531 | 0.5469 | 0.5531 | 9987 | 24718 | 15295 | 10264 | 24780 | 14956 | 167.54 | 157.27 |
| 50000 | 1.09 | 0.4500 | 0.5500 | 10125 | 26978 | 15125 | 94.92  | 0.4469 | 0.4531 | 0.5469 | 0.5531 | 9987 | 24718 | 15295 | 10264 | 24780 | 14956 | 210.31 | 198.70 |
| 50000 | 1.10 | 0.4500 | 0.5500 | 10125 | 27225 | 15125 | 116.63 | 0.4469 | 0.4531 | 0.5469 | 0.5531 | 9987 | 24718 | 15295 | 10264 | 24780 | 14956 | 258.03 | 245.07 |
| 50000 | 1.11 | 0.4500 | 0.5500 | 10125 | 27473 | 15125 | 140.45 | 0.4469 | 0.4531 | 0.5469 | 0.5531 | 9987 | 24718 | 15295 | 10264 | 24780 | 14956 | 310.71 | 296.38 |
| 50000 | 1.12 | 0.4500 | 0.5500 | 10125 | 27720 | 15125 | 166.35 | 0.4469 | 0.4531 | 0.5469 | 0.5531 | 9987 | 24718 | 15295 | 10264 | 24780 | 14956 | 368.34 | 352.64 |
| 50000 | 1.13 | 0.4500 | 0.5500 | 10125 | 27968 | 15125 | 194.31 | 0.4469 | 0.4531 | 0.5469 | 0.5531 | 9987 | 24718 | 15295 | 10264 | 24780 | 14956 | 430.93 | 413.85 |
| 50000 | 1.14 | 0.4500 | 0.5500 | 10125 | 28215 | 15125 | 224.29 | 0.4469 | 0.4531 | 0.5469 | 0.5531 | 9987 | 24718 | 15295 | 10264 | 24780 | 14956 | 498.48 | 479.99 |
| 50000 | 1.15 | 0.4500 | 0.5500 | 10125 | 28463 | 15125 | 256.27 | 0.4469 | 0.4531 | 0.5469 | 0.5531 | 9987 | 24718 | 15295 | 10264 | 24780 | 14956 | 570.99 | 551.09 |
| 50000 | 1.16 | 0.4500 | 0.5500 | 10125 | 28710 | 15125 | 290.22 | 0.4469 | 0.4531 | 0.5469 | 0.5531 | 9987 | 24718 | 15295 | 10264 | 24780 | 14956 | 648.45 | 627.12 |
| 50000 | 1.17 | 0.4500 | 0.5500 | 10125 | 28958 | 15125 | 326.11 | 0.4469 | 0.4531 | 0.5469 | 0.5531 | 9987 | 24718 | 15295 | 10264 | 24780 | 14956 | 730.86 | 708.10 |
| 50000 | 1.18 | 0.4500 | 0.5500 | 10125 | 29205 | 15125 | 363.91 | 0.4469 | 0.4531 | 0.5469 | 0.5531 | 9987 | 24718 | 15295 | 10264 | 24780 | 14956 | 818.24 | 794.02 |

|       |      |        |        |       |       |       |        |        |        |        |        |       |       |       |       |       |       |         |         |
|-------|------|--------|--------|-------|-------|-------|--------|--------|--------|--------|--------|-------|-------|-------|-------|-------|-------|---------|---------|
| 50000 | 1.19 | 0.4500 | 0.5500 | 10125 | 29453 | 15125 | 403.61 | 0.4469 | 0.4531 | 0.5469 | 0.5531 | 9987  | 24718 | 15295 | 10264 | 24780 | 14956 | 910.56  | 884.89  |
| 50000 | 1.20 | 0.4500 | 0.5500 | 10125 | 29700 | 15125 | 445.17 | 0.4469 | 0.4531 | 0.5469 | 0.5531 | 9987  | 24718 | 15295 | 10264 | 24780 | 14956 | 1007.85 | 980.70  |
| 50000 | 0.80 | 0.5000 | 0.5000 | 12500 | 20000 | 12500 | 555.56 | 0.4969 | 0.5031 | 0.4969 | 0.5031 | 12346 | 24999 | 12655 | 12655 | 24999 | 12346 | 1003.50 | 1003.50 |
| 50000 | 0.81 | 0.5000 | 0.5000 | 12500 | 20250 | 12500 | 498.62 | 0.4969 | 0.5031 | 0.4969 | 0.5031 | 12346 | 24999 | 12655 | 12655 | 24999 | 12346 | 906.01  | 906.01  |
| 50000 | 0.82 | 0.5000 | 0.5000 | 12500 | 20500 | 12500 | 445.05 | 0.4969 | 0.5031 | 0.4969 | 0.5031 | 12346 | 24999 | 12655 | 12655 | 24999 | 12346 | 813.53  | 813.53  |
| 50000 | 0.83 | 0.5000 | 0.5000 | 12500 | 20750 | 12500 | 394.81 | 0.4969 | 0.5031 | 0.4969 | 0.5031 | 12346 | 24999 | 12655 | 12655 | 24999 | 12346 | 726.04  | 726.04  |
| 50000 | 0.84 | 0.5000 | 0.5000 | 12500 | 21000 | 12500 | 347.83 | 0.4969 | 0.5031 | 0.4969 | 0.5031 | 12346 | 24999 | 12655 | 12655 | 24999 | 12346 | 643.56  | 643.56  |
| 50000 | 0.85 | 0.5000 | 0.5000 | 12500 | 21250 | 12500 | 304.05 | 0.4969 | 0.5031 | 0.4969 | 0.5031 | 12346 | 24999 | 12655 | 12655 | 24999 | 12346 | 566.08  | 566.08  |
| 50000 | 0.86 | 0.5000 | 0.5000 | 12500 | 21500 | 12500 | 263.44 | 0.4969 | 0.5031 | 0.4969 | 0.5031 | 12346 | 24999 | 12655 | 12655 | 24999 | 12346 | 493.59  | 493.59  |
| 50000 | 0.87 | 0.5000 | 0.5000 | 12500 | 21750 | 12500 | 225.94 | 0.4969 | 0.5031 | 0.4969 | 0.5031 | 12346 | 24999 | 12655 | 12655 | 24999 | 12346 | 426.11  | 426.11  |
| 50000 | 0.88 | 0.5000 | 0.5000 | 12500 | 22000 | 12500 | 191.49 | 0.4969 | 0.5031 | 0.4969 | 0.5031 | 12346 | 24999 | 12655 | 12655 | 24999 | 12346 | 363.63  | 363.63  |
| 50000 | 0.89 | 0.5000 | 0.5000 | 12500 | 22250 | 12500 | 160.05 | 0.4969 | 0.5031 | 0.4969 | 0.5031 | 12346 | 24999 | 12655 | 12655 | 24999 | 12346 | 306.14  | 306.14  |
| 50000 | 0.90 | 0.5000 | 0.5000 | 12500 | 22500 | 12500 | 131.58 | 0.4969 | 0.5031 | 0.4969 | 0.5031 | 12346 | 24999 | 12655 | 12655 | 24999 | 12346 | 253.66  | 253.66  |
| 50000 | 0.91 | 0.5000 | 0.5000 | 12500 | 22750 | 12500 | 106.02 | 0.4969 | 0.5031 | 0.4969 | 0.5031 | 12346 | 24999 | 12655 | 12655 | 24999 | 12346 | 206.18  | 206.18  |
| 50000 | 0.92 | 0.5000 | 0.5000 | 12500 | 23000 | 12500 | 83.33  | 0.4969 | 0.5031 | 0.4969 | 0.5031 | 12346 | 24999 | 12655 | 12655 | 24999 | 12346 | 163.69  | 163.69  |
| 50000 | 0.93 | 0.5000 | 0.5000 | 12500 | 23250 | 12500 | 63.47  | 0.4969 | 0.5031 | 0.4969 | 0.5031 | 12346 | 24999 | 12655 | 12655 | 24999 | 12346 | 126.21  | 126.21  |
| 50000 | 0.94 | 0.5000 | 0.5000 | 12500 | 23500 | 12500 | 46.39  | 0.4969 | 0.5031 | 0.4969 | 0.5031 | 12346 | 24999 | 12655 | 12655 | 24999 | 12346 | 93.73   | 93.73   |
| 50000 | 0.95 | 0.5000 | 0.5000 | 12500 | 23750 | 12500 | 32.05  | 0.4969 | 0.5031 | 0.4969 | 0.5031 | 12346 | 24999 | 12655 | 12655 | 24999 | 12346 | 66.25   | 66.25   |
| 50000 | 0.96 | 0.5000 | 0.5000 | 12500 | 24000 | 12500 | 20.41  | 0.4969 | 0.5031 | 0.4969 | 0.5031 | 12346 | 24999 | 12655 | 12655 | 24999 | 12346 | 43.77   | 43.77   |
| 50000 | 0.97 | 0.5000 | 0.5000 | 12500 | 24250 | 12500 | 11.42  | 0.4969 | 0.5031 | 0.4969 | 0.5031 | 12346 | 24999 | 12655 | 12655 | 24999 | 12346 | 26.29   | 26.29   |
| 50000 | 0.98 | 0.5000 | 0.5000 | 12500 | 24500 | 12500 | 5.05   | 0.4969 | 0.5031 | 0.4969 | 0.5031 | 12346 | 24999 | 12655 | 12655 | 24999 | 12346 | 13.80   | 13.80   |
| 50000 | 0.99 | 0.5000 | 0.5000 | 12500 | 24750 | 12500 | 1.26   | 0.4969 | 0.5031 | 0.4969 | 0.5031 | 12346 | 24999 | 12655 | 12655 | 24999 | 12346 | 6.32    | 6.32    |
| 50000 | 1.00 | 0.5000 | 0.5000 | 12500 | 25000 | 12500 | 0.00   | 0.4969 | 0.5031 | 0.4969 | 0.5031 | 12346 | 24999 | 12655 | 12655 | 24999 | 12346 | 3.84    | 3.84    |
| 50000 | 1.01 | 0.5000 | 0.5000 | 12500 | 25250 | 12500 | 1.24   | 0.4969 | 0.5031 | 0.4969 | 0.5031 | 12346 | 24999 | 12655 | 12655 | 24999 | 12346 | 6.36    | 6.36    |
| 50000 | 1.02 | 0.5000 | 0.5000 | 12500 | 25500 | 12500 | 4.95   | 0.4969 | 0.5031 | 0.4969 | 0.5031 | 12346 | 24999 | 12655 | 12655 | 24999 | 12346 | 13.88   | 13.88   |
| 50000 | 1.03 | 0.5000 | 0.5000 | 12500 | 25750 | 12500 | 11.08  | 0.4969 | 0.5031 | 0.4969 | 0.5031 | 12346 | 24999 | 12655 | 12655 | 24999 | 12346 | 26.40   | 26.40   |
| 50000 | 1.04 | 0.5000 | 0.5000 | 12500 | 26000 | 12500 | 19.61  | 0.4969 | 0.5031 | 0.4969 | 0.5031 | 12346 | 24999 | 12655 | 12655 | 24999 | 12346 | 43.92   | 43.92   |
| 50000 | 1.05 | 0.5000 | 0.5000 | 12500 | 26250 | 12500 | 30.49  | 0.4969 | 0.5031 | 0.4969 | 0.5031 | 12346 | 24999 | 12655 | 12655 | 24999 | 12346 | 66.44   | 66.44   |
| 50000 | 1.06 | 0.5000 | 0.5000 | 12500 | 26500 | 12500 | 43.69  | 0.4969 | 0.5031 | 0.4969 | 0.5031 | 12346 | 24999 | 12655 | 12655 | 24999 | 12346 | 93.96   | 93.96   |
| 50000 | 1.07 | 0.5000 | 0.5000 | 12500 | 26750 | 12500 | 59.18  | 0.4969 | 0.5031 | 0.4969 | 0.5031 | 12346 | 24999 | 12655 | 12655 | 24999 | 12346 | 126.48  | 126.48  |
| 50000 | 1.08 | 0.5000 | 0.5000 | 12500 | 27000 | 12500 | 76.92  | 0.4969 | 0.5031 | 0.4969 | 0.5031 | 12346 | 24999 | 12655 | 12655 | 24999 | 12346 | 164.00  | 164.00  |
| 50000 | 1.09 | 0.5000 | 0.5000 | 12500 | 27250 | 12500 | 96.89  | 0.4969 | 0.5031 | 0.4969 | 0.5031 | 12346 | 24999 | 12655 | 12655 | 24999 | 12346 | 206.52  | 206.52  |
| 50000 | 1.10 | 0.5000 | 0.5000 | 12500 | 27500 | 12500 | 119.05 | 0.4969 | 0.5031 | 0.4969 | 0.5031 | 12346 | 24999 | 12655 | 12655 | 24999 | 12346 | 254.04  | 254.04  |
| 50000 | 1.11 | 0.5000 | 0.5000 | 12500 | 27750 | 12500 | 143.36 | 0.4969 | 0.5031 | 0.4969 | 0.5031 | 12346 | 24999 | 12655 | 12655 | 24999 | 12346 | 306.56  | 306.56  |
| 50000 | 1.12 | 0.5000 | 0.5000 | 12500 | 28000 | 12500 | 169.81 | 0.4969 | 0.5031 | 0.4969 | 0.5031 | 12346 | 24999 | 12655 | 12655 | 24999 | 12346 | 364.09  | 364.09  |

|       |      |        |        |       |       |       |        |        |        |        |        |       |       |       |       |       |       |         |         |
|-------|------|--------|--------|-------|-------|-------|--------|--------|--------|--------|--------|-------|-------|-------|-------|-------|-------|---------|---------|
| 50000 | 1.13 | 0.5000 | 0.5000 | 12500 | 28250 | 12500 | 198.36 | 0.4969 | 0.5031 | 0.4969 | 0.5031 | 12346 | 24999 | 12655 | 12655 | 24999 | 12346 | 426.61  | 426.61  |
| 50000 | 1.14 | 0.5000 | 0.5000 | 12500 | 28500 | 12500 | 228.97 | 0.4969 | 0.5031 | 0.4969 | 0.5031 | 12346 | 24999 | 12655 | 12655 | 24999 | 12346 | 494.13  | 494.13  |
| 50000 | 1.15 | 0.5000 | 0.5000 | 12500 | 28750 | 12500 | 261.63 | 0.4969 | 0.5031 | 0.4969 | 0.5031 | 12346 | 24999 | 12655 | 12655 | 24999 | 12346 | 566.65  | 566.65  |
| 50000 | 1.16 | 0.5000 | 0.5000 | 12500 | 29000 | 12500 | 296.30 | 0.4969 | 0.5031 | 0.4969 | 0.5031 | 12346 | 24999 | 12655 | 12655 | 24999 | 12346 | 644.17  | 644.17  |
| 50000 | 1.17 | 0.5000 | 0.5000 | 12500 | 29250 | 12500 | 332.95 | 0.4969 | 0.5031 | 0.4969 | 0.5031 | 12346 | 24999 | 12655 | 12655 | 24999 | 12346 | 726.70  | 726.70  |
| 50000 | 1.18 | 0.5000 | 0.5000 | 12500 | 29500 | 12500 | 371.56 | 0.4969 | 0.5031 | 0.4969 | 0.5031 | 12346 | 24999 | 12655 | 12655 | 24999 | 12346 | 814.22  | 814.22  |
| 50000 | 1.19 | 0.5000 | 0.5000 | 12500 | 29750 | 12500 | 412.10 | 0.4969 | 0.5031 | 0.4969 | 0.5031 | 12346 | 24999 | 12655 | 12655 | 24999 | 12346 | 906.74  | 906.74  |
| 50000 | 1.20 | 0.5000 | 0.5000 | 12500 | 30000 | 12500 | 454.55 | 0.4969 | 0.5031 | 0.4969 | 0.5031 | 12346 | 24999 | 12655 | 12655 | 24999 | 12346 | 1004.26 | 1004.26 |
| 50000 | 0.80 | 0.5500 | 0.4500 | 15125 | 19800 | 10125 | 545.24 | 0.5469 | 0.5531 | 0.4469 | 0.4531 | 14956 | 24780 | 10264 | 15295 | 24718 | 9987  | 1004.58 | 982.39  |
| 50000 | 0.81 | 0.5500 | 0.4500 | 15125 | 20048 | 10125 | 489.32 | 0.5469 | 0.5531 | 0.4469 | 0.4531 | 14956 | 24780 | 10264 | 15295 | 24718 | 9987  | 907.58  | 886.38  |
| 50000 | 0.82 | 0.5500 | 0.4500 | 15125 | 20295 | 10125 | 436.72 | 0.5469 | 0.5531 | 0.4469 | 0.4531 | 14956 | 24780 | 10264 | 15295 | 24718 | 9987  | 815.52  | 795.32  |
| 50000 | 0.83 | 0.5500 | 0.4500 | 15125 | 20543 | 10125 | 387.38 | 0.5469 | 0.5531 | 0.4469 | 0.4531 | 14956 | 24780 | 10264 | 15295 | 24718 | 9987  | 728.40  | 709.22  |
| 50000 | 0.84 | 0.5500 | 0.4500 | 15125 | 20790 | 10125 | 341.25 | 0.5469 | 0.5531 | 0.4469 | 0.4531 | 14956 | 24780 | 10264 | 15295 | 24718 | 9987  | 646.22  | 628.08  |
| 50000 | 0.85 | 0.5500 | 0.4500 | 15125 | 21038 | 10125 | 298.28 | 0.5469 | 0.5531 | 0.4469 | 0.4531 | 14956 | 24780 | 10264 | 15295 | 24718 | 9987  | 568.99  | 551.89  |
| 50000 | 0.86 | 0.5500 | 0.4500 | 15125 | 21285 | 10125 | 258.42 | 0.5469 | 0.5531 | 0.4469 | 0.4531 | 14956 | 24780 | 10264 | 15295 | 24718 | 9987  | 496.71  | 480.66  |
| 50000 | 0.87 | 0.5500 | 0.4500 | 15125 | 21533 | 10125 | 221.62 | 0.5469 | 0.5531 | 0.4469 | 0.4531 | 14956 | 24780 | 10264 | 15295 | 24718 | 9987  | 429.37  | 414.38  |
| 50000 | 0.88 | 0.5500 | 0.4500 | 15125 | 21780 | 10125 | 187.81 | 0.5469 | 0.5531 | 0.4469 | 0.4531 | 14956 | 24780 | 10264 | 15295 | 24718 | 9987  | 366.97  | 353.07  |
| 50000 | 0.89 | 0.5500 | 0.4500 | 15125 | 22028 | 10125 | 156.97 | 0.5469 | 0.5531 | 0.4469 | 0.4531 | 14956 | 24780 | 10264 | 15295 | 24718 | 9987  | 309.52  | 296.70  |
| 50000 | 0.90 | 0.5500 | 0.4500 | 15125 | 22275 | 10125 | 129.04 | 0.5469 | 0.5531 | 0.4469 | 0.4531 | 14956 | 24780 | 10264 | 15295 | 24718 | 9987  | 257.01  | 245.30  |
| 50000 | 0.91 | 0.5500 | 0.4500 | 15125 | 22523 | 10125 | 103.96 | 0.5469 | 0.5531 | 0.4469 | 0.4531 | 14956 | 24780 | 10264 | 15295 | 24718 | 9987  | 209.44  | 198.85  |
| 50000 | 0.92 | 0.5500 | 0.4500 | 15125 | 22770 | 10125 | 81.71  | 0.5469 | 0.5531 | 0.4469 | 0.4531 | 14956 | 24780 | 10264 | 15295 | 24718 | 9987  | 166.82  | 157.36  |
| 50000 | 0.93 | 0.5500 | 0.4500 | 15125 | 23018 | 10125 | 62.23  | 0.5469 | 0.5531 | 0.4469 | 0.4531 | 14956 | 24780 | 10264 | 15295 | 24718 | 9987  | 129.14  | 120.82  |
| 50000 | 0.94 | 0.5500 | 0.4500 | 15125 | 23265 | 10125 | 45.48  | 0.5469 | 0.5531 | 0.4469 | 0.4531 | 14956 | 24780 | 10264 | 15295 | 24718 | 9987  | 96.41   | 89.24   |
| 50000 | 0.95 | 0.5500 | 0.4500 | 15125 | 23513 | 10125 | 31.42  | 0.5469 | 0.5531 | 0.4469 | 0.4531 | 14956 | 24780 | 10264 | 15295 | 24718 | 9987  | 68.62   | 62.62   |
| 50000 | 0.96 | 0.5500 | 0.4500 | 15125 | 23760 | 10125 | 20.01  | 0.5469 | 0.5531 | 0.4469 | 0.4531 | 14956 | 24780 | 10264 | 15295 | 24718 | 9987  | 45.78   | 40.95   |
| 50000 | 0.97 | 0.5500 | 0.4500 | 15125 | 24008 | 10125 | 11.20  | 0.5469 | 0.5531 | 0.4469 | 0.4531 | 14956 | 24780 | 10264 | 15295 | 24718 | 9987  | 27.88   | 24.24   |
| 50000 | 0.98 | 0.5500 | 0.4500 | 15125 | 24255 | 10125 | 4.95   | 0.5469 | 0.5531 | 0.4469 | 0.4531 | 14956 | 24780 | 10264 | 15295 | 24718 | 9987  | 14.92   | 12.49   |
| 50000 | 0.99 | 0.5500 | 0.4500 | 15125 | 24503 | 10125 | 1.23   | 0.5469 | 0.5531 | 0.4469 | 0.4531 | 14956 | 24780 | 10264 | 15295 | 24718 | 9987  | 6.91    | 5.69    |
| 50000 | 1.00 | 0.5500 | 0.4500 | 15125 | 24750 | 10125 | 0.00   | 0.5469 | 0.5531 | 0.4469 | 0.4531 | 14956 | 24780 | 10264 | 15295 | 24718 | 9987  | 3.84    | 3.85    |
| 50000 | 1.01 | 0.5500 | 0.4500 | 15125 | 24998 | 10125 | 1.22   | 0.5469 | 0.5531 | 0.4469 | 0.4531 | 14956 | 24780 | 10264 | 15295 | 24718 | 9987  | 5.71    | 6.96    |
| 50000 | 1.02 | 0.5500 | 0.4500 | 15125 | 25245 | 10125 | 4.85   | 0.5469 | 0.5531 | 0.4469 | 0.4531 | 14956 | 24780 | 10264 | 15295 | 24718 | 9987  | 12.53   | 15.03   |
| 50000 | 1.03 | 0.5500 | 0.4500 | 15125 | 25493 | 10125 | 10.86  | 0.5469 | 0.5531 | 0.4469 | 0.4531 | 14956 | 24780 | 10264 | 15295 | 24718 | 9987  | 24.29   | 28.06   |
| 50000 | 1.04 | 0.5500 | 0.4500 | 15125 | 25740 | 10125 | 19.21  | 0.5469 | 0.5531 | 0.4469 | 0.4531 | 14956 | 24780 | 10264 | 15295 | 24718 | 9987  | 41.00   | 46.04   |
| 50000 | 1.05 | 0.5500 | 0.4500 | 15125 | 25988 | 10125 | 29.87  | 0.5469 | 0.5531 | 0.4469 | 0.4531 | 14956 | 24780 | 10264 | 15295 | 24718 | 9987  | 62.65   | 68.98   |
| 50000 | 1.06 | 0.5500 | 0.4500 | 15125 | 26235 | 10125 | 42.81  | 0.5469 | 0.5531 | 0.4469 | 0.4531 | 14956 | 24780 | 10264 | 15295 | 24718 | 9987  | 89.25   | 96.88   |

|       |      |        |        |       |       |       |        |        |        |        |        |       |       |       |       |       |      |        |         |
|-------|------|--------|--------|-------|-------|-------|--------|--------|--------|--------|--------|-------|-------|-------|-------|-------|------|--------|---------|
| 50000 | 1.07 | 0.5500 | 0.4500 | 15125 | 26483 | 10125 | 57.98  | 0.5469 | 0.5531 | 0.4469 | 0.4531 | 14956 | 24780 | 10264 | 15295 | 24718 | 9987 | 120.79 | 129.73  |
| 50000 | 1.08 | 0.5500 | 0.4500 | 15125 | 26730 | 10125 | 75.37  | 0.5469 | 0.5531 | 0.4469 | 0.4531 | 14956 | 24780 | 10264 | 15295 | 24718 | 9987 | 157.27 | 167.54  |
| 50000 | 1.09 | 0.5500 | 0.4500 | 15125 | 26978 | 10125 | 94.92  | 0.5469 | 0.5531 | 0.4469 | 0.4531 | 14956 | 24780 | 10264 | 15295 | 24718 | 9987 | 198.70 | 210.31  |
| 50000 | 1.10 | 0.5500 | 0.4500 | 15125 | 27225 | 10125 | 116.63 | 0.5469 | 0.5531 | 0.4469 | 0.4531 | 14956 | 24780 | 10264 | 15295 | 24718 | 9987 | 245.07 | 258.03  |
| 50000 | 1.11 | 0.5500 | 0.4500 | 15125 | 27473 | 10125 | 140.45 | 0.5469 | 0.5531 | 0.4469 | 0.4531 | 14956 | 24780 | 10264 | 15295 | 24718 | 9987 | 296.38 | 310.71  |
| 50000 | 1.12 | 0.5500 | 0.4500 | 15125 | 27720 | 10125 | 166.35 | 0.5469 | 0.5531 | 0.4469 | 0.4531 | 14956 | 24780 | 10264 | 15295 | 24718 | 9987 | 352.64 | 368.34  |
| 50000 | 1.13 | 0.5500 | 0.4500 | 15125 | 27968 | 10125 | 194.31 | 0.5469 | 0.5531 | 0.4469 | 0.4531 | 14956 | 24780 | 10264 | 15295 | 24718 | 9987 | 413.85 | 430.93  |
| 50000 | 1.14 | 0.5500 | 0.4500 | 15125 | 28215 | 10125 | 224.29 | 0.5469 | 0.5531 | 0.4469 | 0.4531 | 14956 | 24780 | 10264 | 15295 | 24718 | 9987 | 479.99 | 498.48  |
| 50000 | 1.15 | 0.5500 | 0.4500 | 15125 | 28463 | 10125 | 256.27 | 0.5469 | 0.5531 | 0.4469 | 0.4531 | 14956 | 24780 | 10264 | 15295 | 24718 | 9987 | 551.09 | 570.99  |
| 50000 | 1.16 | 0.5500 | 0.4500 | 15125 | 28710 | 10125 | 290.22 | 0.5469 | 0.5531 | 0.4469 | 0.4531 | 14956 | 24780 | 10264 | 15295 | 24718 | 9987 | 627.12 | 648.45  |
| 50000 | 1.17 | 0.5500 | 0.4500 | 15125 | 28958 | 10125 | 326.11 | 0.5469 | 0.5531 | 0.4469 | 0.4531 | 14956 | 24780 | 10264 | 15295 | 24718 | 9987 | 708.10 | 730.86  |
| 50000 | 1.18 | 0.5500 | 0.4500 | 15125 | 29205 | 10125 | 363.91 | 0.5469 | 0.5531 | 0.4469 | 0.4531 | 14956 | 24780 | 10264 | 15295 | 24718 | 9987 | 794.02 | 818.24  |
| 50000 | 1.19 | 0.5500 | 0.4500 | 15125 | 29453 | 10125 | 403.61 | 0.5469 | 0.5531 | 0.4469 | 0.4531 | 14956 | 24780 | 10264 | 15295 | 24718 | 9987 | 884.89 | 910.56  |
| 50000 | 1.20 | 0.5500 | 0.4500 | 15125 | 29700 | 10125 | 445.17 | 0.5469 | 0.5531 | 0.4469 | 0.4531 | 14956 | 24780 | 10264 | 15295 | 24718 | 9987 | 980.70 | 1007.85 |
| 50000 | 0.80 | 0.6000 | 0.4000 | 18000 | 19200 | 8000  | 514.78 | 0.5970 | 0.6030 | 0.3970 | 0.4030 | 17818 | 24060 | 8122  | 18183 | 23938 | 7879 | 985.31 | 941.60  |
| 50000 | 0.81 | 0.6000 | 0.4000 | 18000 | 19440 | 8000  | 461.86 | 0.5970 | 0.6030 | 0.3970 | 0.4030 | 17818 | 24060 | 8122  | 18183 | 23938 | 7879 | 890.75 | 849.00  |
| 50000 | 0.82 | 0.6000 | 0.4000 | 18000 | 19680 | 8000  | 412.11 | 0.5970 | 0.6030 | 0.3970 | 0.4030 | 17818 | 24060 | 8122  | 18183 | 23938 | 7879 | 800.98 | 761.20  |
| 50000 | 0.83 | 0.6000 | 0.4000 | 18000 | 19920 | 8000  | 365.46 | 0.5970 | 0.6030 | 0.3970 | 0.4030 | 17818 | 24060 | 8122  | 18183 | 23938 | 7879 | 715.99 | 678.22  |
| 50000 | 0.84 | 0.6000 | 0.4000 | 18000 | 20160 | 8000  | 321.87 | 0.5970 | 0.6030 | 0.3970 | 0.4030 | 17818 | 24060 | 8122  | 18183 | 23938 | 7879 | 635.80 | 600.05  |
| 50000 | 0.85 | 0.6000 | 0.4000 | 18000 | 20400 | 8000  | 281.27 | 0.5970 | 0.6030 | 0.3970 | 0.4030 | 17818 | 24060 | 8122  | 18183 | 23938 | 7879 | 560.39 | 526.70  |
| 50000 | 0.86 | 0.6000 | 0.4000 | 18000 | 20640 | 8000  | 243.63 | 0.5970 | 0.6030 | 0.3970 | 0.4030 | 17818 | 24060 | 8122  | 18183 | 23938 | 7879 | 489.77 | 458.16  |
| 50000 | 0.87 | 0.6000 | 0.4000 | 18000 | 20880 | 8000  | 208.88 | 0.5970 | 0.6030 | 0.3970 | 0.4030 | 17818 | 24060 | 8122  | 18183 | 23938 | 7879 | 423.93 | 394.43  |
| 50000 | 0.88 | 0.6000 | 0.4000 | 18000 | 21120 | 8000  | 176.98 | 0.5970 | 0.6030 | 0.3970 | 0.4030 | 17818 | 24060 | 8122  | 18183 | 23938 | 7879 | 362.89 | 335.51  |
| 50000 | 0.89 | 0.6000 | 0.4000 | 18000 | 21360 | 8000  | 147.89 | 0.5970 | 0.6030 | 0.3970 | 0.4030 | 17818 | 24060 | 8122  | 18183 | 23938 | 7879 | 306.63 | 281.40  |
| 50000 | 0.90 | 0.6000 | 0.4000 | 18000 | 21600 | 8000  | 121.55 | 0.5970 | 0.6030 | 0.3970 | 0.4030 | 17818 | 24060 | 8122  | 18183 | 23938 | 7879 | 255.17 | 232.11  |
| 50000 | 0.91 | 0.6000 | 0.4000 | 18000 | 21840 | 8000  | 97.91  | 0.5970 | 0.6030 | 0.3970 | 0.4030 | 17818 | 24060 | 8122  | 18183 | 23938 | 7879 | 208.49 | 187.63  |
| 50000 | 0.92 | 0.6000 | 0.4000 | 18000 | 22080 | 8000  | 76.94  | 0.5970 | 0.6030 | 0.3970 | 0.4030 | 17818 | 24060 | 8122  | 18183 | 23938 | 7879 | 166.60 | 147.96  |
| 50000 | 0.93 | 0.6000 | 0.4000 | 18000 | 22320 | 8000  | 58.59  | 0.5970 | 0.6030 | 0.3970 | 0.4030 | 17818 | 24060 | 8122  | 18183 | 23938 | 7879 | 129.49 | 113.10  |
| 50000 | 0.94 | 0.6000 | 0.4000 | 18000 | 22560 | 8000  | 42.81  | 0.5970 | 0.6030 | 0.3970 | 0.4030 | 17818 | 24060 | 8122  | 18183 | 23938 | 7879 | 97.18  | 83.06   |
| 50000 | 0.95 | 0.6000 | 0.4000 | 18000 | 22800 | 8000  | 29.57  | 0.5970 | 0.6030 | 0.3970 | 0.4030 | 17818 | 24060 | 8122  | 18183 | 23938 | 7879 | 69.65  | 57.83   |
| 50000 | 0.96 | 0.6000 | 0.4000 | 18000 | 23040 | 8000  | 18.82  | 0.5970 | 0.6030 | 0.3970 | 0.4030 | 17818 | 24060 | 8122  | 18183 | 23938 | 7879 | 46.91  | 37.41   |
| 50000 | 0.97 | 0.6000 | 0.4000 | 18000 | 23280 | 8000  | 10.53  | 0.5970 | 0.6030 | 0.3970 | 0.4030 | 17818 | 24060 | 8122  | 18183 | 23938 | 7879 | 28.96  | 21.80   |
| 50000 | 0.98 | 0.6000 | 0.4000 | 18000 | 23520 | 8000  | 4.66   | 0.5970 | 0.6030 | 0.3970 | 0.4030 | 17818 | 24060 | 8122  | 18183 | 23938 | 7879 | 15.79  | 11.00   |
| 50000 | 0.99 | 0.6000 | 0.4000 | 18000 | 23760 | 8000  | 1.16   | 0.5970 | 0.6030 | 0.3970 | 0.4030 | 17818 | 24060 | 8122  | 18183 | 23938 | 7879 | 7.42   | 5.02    |
| 50000 | 1.00 | 0.6000 | 0.4000 | 18000 | 24000 | 8000  | 0.00   | 0.5970 | 0.6030 | 0.3970 | 0.4030 | 17818 | 24060 | 8122  | 18183 | 23938 | 7879 | 3.83   | 3.85    |

|       |      |        |        |       |       |      |        |        |        |        |        |       |       |      |       |       |      |        |        |
|-------|------|--------|--------|-------|-------|------|--------|--------|--------|--------|--------|-------|-------|------|-------|-------|------|--------|--------|
| 50000 | 1.01 | 0.6000 | 0.4000 | 18000 | 24240 | 8000 | 1.15   | 0.5970 | 0.6030 | 0.3970 | 0.4030 | 17818 | 24060 | 8122 | 18183 | 23938 | 7879 | 5.03   | 7.49   |
| 50000 | 1.02 | 0.6000 | 0.4000 | 18000 | 24480 | 8000 | 4.56   | 0.5970 | 0.6030 | 0.3970 | 0.4030 | 17818 | 24060 | 8122 | 18183 | 23938 | 7879 | 11.02  | 15.95  |
| 50000 | 1.03 | 0.6000 | 0.4000 | 18000 | 24720 | 8000 | 10.21  | 0.5970 | 0.6030 | 0.3970 | 0.4030 | 17818 | 24060 | 8122 | 18183 | 23938 | 7879 | 21.80  | 29.22  |
| 50000 | 1.04 | 0.6000 | 0.4000 | 18000 | 24960 | 8000 | 18.06  | 0.5970 | 0.6030 | 0.3970 | 0.4030 | 17818 | 24060 | 8122 | 18183 | 23938 | 7879 | 37.36  | 47.30  |
| 50000 | 1.05 | 0.6000 | 0.4000 | 18000 | 25200 | 8000 | 28.07  | 0.5970 | 0.6030 | 0.3970 | 0.4030 | 17818 | 24060 | 8122 | 18183 | 23938 | 7879 | 57.72  | 70.19  |
| 50000 | 1.06 | 0.6000 | 0.4000 | 18000 | 25440 | 8000 | 40.22  | 0.5970 | 0.6030 | 0.3970 | 0.4030 | 17818 | 24060 | 8122 | 18183 | 23938 | 7879 | 82.86  | 97.89  |
| 50000 | 1.07 | 0.6000 | 0.4000 | 18000 | 25680 | 8000 | 54.47  | 0.5970 | 0.6030 | 0.3970 | 0.4030 | 17818 | 24060 | 8122 | 18183 | 23938 | 7879 | 112.79 | 130.41 |
| 50000 | 1.08 | 0.6000 | 0.4000 | 18000 | 25920 | 8000 | 70.79  | 0.5970 | 0.6030 | 0.3970 | 0.4030 | 17818 | 24060 | 8122 | 18183 | 23938 | 7879 | 147.51 | 167.74 |
| 50000 | 1.09 | 0.6000 | 0.4000 | 18000 | 26160 | 8000 | 89.15  | 0.5970 | 0.6030 | 0.3970 | 0.4030 | 17818 | 24060 | 8122 | 18183 | 23938 | 7879 | 187.01 | 209.88 |
| 50000 | 1.10 | 0.6000 | 0.4000 | 18000 | 26400 | 8000 | 109.53 | 0.5970 | 0.6030 | 0.3970 | 0.4030 | 17818 | 24060 | 8122 | 18183 | 23938 | 7879 | 231.30 | 256.83 |
| 50000 | 1.11 | 0.6000 | 0.4000 | 18000 | 26640 | 8000 | 131.88 | 0.5970 | 0.6030 | 0.3970 | 0.4030 | 17818 | 24060 | 8122 | 18183 | 23938 | 7879 | 280.39 | 308.60 |
| 50000 | 1.12 | 0.6000 | 0.4000 | 18000 | 26880 | 8000 | 156.18 | 0.5970 | 0.6030 | 0.3970 | 0.4030 | 17818 | 24060 | 8122 | 18183 | 23938 | 7879 | 334.26 | 365.18 |
| 50000 | 1.13 | 0.6000 | 0.4000 | 18000 | 27120 | 8000 | 182.41 | 0.5970 | 0.6030 | 0.3970 | 0.4030 | 17818 | 24060 | 8122 | 18183 | 23938 | 7879 | 392.91 | 426.57 |
| 50000 | 1.14 | 0.6000 | 0.4000 | 18000 | 27360 | 8000 | 210.54 | 0.5970 | 0.6030 | 0.3970 | 0.4030 | 17818 | 24060 | 8122 | 18183 | 23938 | 7879 | 456.36 | 492.77 |
| 50000 | 1.15 | 0.6000 | 0.4000 | 18000 | 27600 | 8000 | 240.54 | 0.5970 | 0.6030 | 0.3970 | 0.4030 | 17818 | 24060 | 8122 | 18183 | 23938 | 7879 | 524.59 | 563.79 |
| 50000 | 1.16 | 0.6000 | 0.4000 | 18000 | 27840 | 8000 | 272.38 | 0.5970 | 0.6030 | 0.3970 | 0.4030 | 17818 | 24060 | 8122 | 18183 | 23938 | 7879 | 597.61 | 639.61 |
| 50000 | 1.17 | 0.6000 | 0.4000 | 18000 | 28080 | 8000 | 306.03 | 0.5970 | 0.6030 | 0.3970 | 0.4030 | 17818 | 24060 | 8122 | 18183 | 23938 | 7879 | 675.42 | 720.25 |
| 50000 | 1.18 | 0.6000 | 0.4000 | 18000 | 28320 | 8000 | 341.48 | 0.5970 | 0.6030 | 0.3970 | 0.4030 | 17818 | 24060 | 8122 | 18183 | 23938 | 7879 | 758.02 | 805.71 |
| 50000 | 1.19 | 0.6000 | 0.4000 | 18000 | 28560 | 8000 | 378.70 | 0.5970 | 0.6030 | 0.3970 | 0.4030 | 17818 | 24060 | 8122 | 18183 | 23938 | 7879 | 845.41 | 895.97 |
| 50000 | 1.20 | 0.6000 | 0.4000 | 18000 | 28800 | 8000 | 417.66 | 0.5970 | 0.6030 | 0.3970 | 0.4030 | 17818 | 24060 | 8122 | 18183 | 23938 | 7879 | 937.58 | 991.05 |
| 50000 | 0.80 | 0.6500 | 0.3500 | 21125 | 18200 | 6125 | 465.69 | 0.6470 | 0.6530 | 0.3470 | 0.3530 | 20933 | 22838 | 6229 | 21318 | 22660 | 6022 | 945.32 | 881.49 |
| 50000 | 0.81 | 0.6500 | 0.3500 | 21125 | 18428 | 6125 | 417.64 | 0.6470 | 0.6530 | 0.3470 | 0.3530 | 20933 | 22838 | 6229 | 21318 | 22660 | 6022 | 855.19 | 794.21 |
| 50000 | 0.82 | 0.6500 | 0.3500 | 21125 | 18655 | 6125 | 372.49 | 0.6470 | 0.6530 | 0.3470 | 0.3530 | 20933 | 22838 | 6229 | 21318 | 22660 | 6022 | 769.58 | 711.50 |
| 50000 | 0.83 | 0.6500 | 0.3500 | 21125 | 18883 | 6125 | 330.19 | 0.6470 | 0.6530 | 0.3470 | 0.3530 | 20933 | 22838 | 6229 | 21318 | 22660 | 6022 | 688.52 | 633.36 |
| 50000 | 0.84 | 0.6500 | 0.3500 | 21125 | 19110 | 6125 | 290.68 | 0.6470 | 0.6530 | 0.3470 | 0.3530 | 20933 | 22838 | 6229 | 21318 | 22660 | 6022 | 611.98 | 559.79 |
| 50000 | 0.85 | 0.6500 | 0.3500 | 21125 | 19338 | 6125 | 253.92 | 0.6470 | 0.6530 | 0.3470 | 0.3530 | 20933 | 22838 | 6229 | 21318 | 22660 | 6022 | 539.98 | 490.78 |
| 50000 | 0.86 | 0.6500 | 0.3500 | 21125 | 19565 | 6125 | 219.86 | 0.6470 | 0.6530 | 0.3470 | 0.3530 | 20933 | 22838 | 6229 | 21318 | 22660 | 6022 | 472.51 | 426.34 |
| 50000 | 0.87 | 0.6500 | 0.3500 | 21125 | 19793 | 6125 | 188.43 | 0.6470 | 0.6530 | 0.3470 | 0.3530 | 20933 | 22838 | 6229 | 21318 | 22660 | 6022 | 409.57 | 366.47 |
| 50000 | 0.88 | 0.6500 | 0.3500 | 21125 | 20020 | 6125 | 159.60 | 0.6470 | 0.6530 | 0.3470 | 0.3530 | 20933 | 22838 | 6229 | 21318 | 22660 | 6022 | 351.16 | 311.17 |
| 50000 | 0.89 | 0.6500 | 0.3500 | 21125 | 20248 | 6125 | 133.32 | 0.6470 | 0.6530 | 0.3470 | 0.3530 | 20933 | 22838 | 6229 | 21318 | 22660 | 6022 | 297.29 | 260.44 |
| 50000 | 0.90 | 0.6500 | 0.3500 | 21125 | 20475 | 6125 | 109.53 | 0.6470 | 0.6530 | 0.3470 | 0.3530 | 20933 | 22838 | 6229 | 21318 | 22660 | 6022 | 247.95 | 214.27 |
| 50000 | 0.91 | 0.6500 | 0.3500 | 21125 | 20703 | 6125 | 88.20  | 0.6470 | 0.6530 | 0.3470 | 0.3530 | 20933 | 22838 | 6229 | 21318 | 22660 | 6022 | 203.14 | 172.68 |
| 50000 | 0.92 | 0.6500 | 0.3500 | 21125 | 20930 | 6125 | 69.29  | 0.6470 | 0.6530 | 0.3470 | 0.3530 | 20933 | 22838 | 6229 | 21318 | 22660 | 6022 | 162.86 | 135.65 |
| 50000 | 0.93 | 0.6500 | 0.3500 | 21125 | 21158 | 6125 | 52.74  | 0.6470 | 0.6530 | 0.3470 | 0.3530 | 20933 | 22838 | 6229 | 21318 | 22660 | 6022 | 127.12 | 103.18 |
| 50000 | 0.94 | 0.6500 | 0.3500 | 21125 | 21385 | 6125 | 38.53  | 0.6470 | 0.6530 | 0.3470 | 0.3530 | 20933 | 22838 | 6229 | 21318 | 22660 | 6022 | 95.91  | 75.29  |

|       |      |        |        |       |       |      |        |        |        |        |        |       |       |      |       |       |      |        |        |
|-------|------|--------|--------|-------|-------|------|--------|--------|--------|--------|--------|-------|-------|------|-------|-------|------|--------|--------|
| 50000 | 0.95 | 0.6500 | 0.3500 | 21125 | 21613 | 6125 | 26.61  | 0.6470 | 0.6530 | 0.3470 | 0.3530 | 20933 | 22838 | 6229 | 21318 | 22660 | 6022 | 69.23  | 51.96  |
| 50000 | 0.96 | 0.6500 | 0.3500 | 21125 | 21840 | 6125 | 16.93  | 0.6470 | 0.6530 | 0.3470 | 0.3530 | 20933 | 22838 | 6229 | 21318 | 22660 | 6022 | 47.09  | 33.21  |
| 50000 | 0.97 | 0.6500 | 0.3500 | 21125 | 22068 | 6125 | 9.47   | 0.6470 | 0.6530 | 0.3470 | 0.3530 | 20933 | 22838 | 6229 | 21318 | 22660 | 6022 | 29.47  | 19.02  |
| 50000 | 0.98 | 0.6500 | 0.3500 | 21125 | 22295 | 6125 | 4.19   | 0.6470 | 0.6530 | 0.3470 | 0.3530 | 20933 | 22838 | 6229 | 21318 | 22660 | 6022 | 16.39  | 9.40   |
| 50000 | 0.99 | 0.6500 | 0.3500 | 21125 | 22523 | 6125 | 1.04   | 0.6470 | 0.6530 | 0.3470 | 0.3530 | 20933 | 22838 | 6229 | 21318 | 22660 | 6022 | 7.84   | 4.34   |
| 50000 | 1.00 | 0.6500 | 0.3500 | 21125 | 22750 | 6125 | 0.00   | 0.6470 | 0.6530 | 0.3470 | 0.3530 | 20933 | 22838 | 6229 | 21318 | 22660 | 6022 | 3.83   | 3.86   |
| 50000 | 1.01 | 0.6500 | 0.3500 | 21125 | 22978 | 6125 | 1.03   | 0.6470 | 0.6530 | 0.3470 | 0.3530 | 20933 | 22838 | 6229 | 21318 | 22660 | 6022 | 4.34   | 7.94   |
| 50000 | 1.02 | 0.6500 | 0.3500 | 21125 | 23205 | 6125 | 4.10   | 0.6470 | 0.6530 | 0.3470 | 0.3530 | 20933 | 22838 | 6229 | 21318 | 22660 | 6022 | 9.39   | 16.59  |
| 50000 | 1.03 | 0.6500 | 0.3500 | 21125 | 23433 | 6125 | 9.17   | 0.6470 | 0.6530 | 0.3470 | 0.3530 | 20933 | 22838 | 6229 | 21318 | 22660 | 6022 | 18.97  | 29.81  |
| 50000 | 1.04 | 0.6500 | 0.3500 | 21125 | 23660 | 6125 | 16.21  | 0.6470 | 0.6530 | 0.3470 | 0.3530 | 20933 | 22838 | 6229 | 21318 | 22660 | 6022 | 33.09  | 47.59  |
| 50000 | 1.05 | 0.6500 | 0.3500 | 21125 | 23888 | 6125 | 25.19  | 0.6470 | 0.6530 | 0.3470 | 0.3530 | 20933 | 22838 | 6229 | 21318 | 22660 | 6022 | 51.74  | 69.95  |
| 50000 | 1.06 | 0.6500 | 0.3500 | 21125 | 24115 | 6125 | 36.09  | 0.6470 | 0.6530 | 0.3470 | 0.3530 | 20933 | 22838 | 6229 | 21318 | 22660 | 6022 | 74.91  | 96.87  |
| 50000 | 1.07 | 0.6500 | 0.3500 | 21125 | 24343 | 6125 | 48.87  | 0.6470 | 0.6530 | 0.3470 | 0.3530 | 20933 | 22838 | 6229 | 21318 | 22660 | 6022 | 102.63 | 128.36 |
| 50000 | 1.08 | 0.6500 | 0.3500 | 21125 | 24570 | 6125 | 63.50  | 0.6470 | 0.6530 | 0.3470 | 0.3530 | 20933 | 22838 | 6229 | 21318 | 22660 | 6022 | 134.87 | 164.42 |
| 50000 | 1.09 | 0.6500 | 0.3500 | 21125 | 24798 | 6125 | 79.95  | 0.6470 | 0.6530 | 0.3470 | 0.3530 | 20933 | 22838 | 6229 | 21318 | 22660 | 6022 | 171.65 | 205.05 |
| 50000 | 1.10 | 0.6500 | 0.3500 | 21125 | 25025 | 6125 | 98.20  | 0.6470 | 0.6530 | 0.3470 | 0.3530 | 20933 | 22838 | 6229 | 21318 | 22660 | 6022 | 212.96 | 250.24 |
| 50000 | 1.11 | 0.6500 | 0.3500 | 21125 | 25253 | 6125 | 118.22 | 0.6470 | 0.6530 | 0.3470 | 0.3530 | 20933 | 22838 | 6229 | 21318 | 22660 | 6022 | 258.80 | 300.00 |
| 50000 | 1.12 | 0.6500 | 0.3500 | 21125 | 25480 | 6125 | 139.99 | 0.6470 | 0.6530 | 0.3470 | 0.3530 | 20933 | 22838 | 6229 | 21318 | 22660 | 6022 | 309.17 | 354.33 |
| 50000 | 1.13 | 0.6500 | 0.3500 | 21125 | 25708 | 6125 | 163.47 | 0.6470 | 0.6530 | 0.3470 | 0.3530 | 20933 | 22838 | 6229 | 21318 | 22660 | 6022 | 364.08 | 413.23 |
| 50000 | 1.14 | 0.6500 | 0.3500 | 21125 | 25935 | 6125 | 188.64 | 0.6470 | 0.6530 | 0.3470 | 0.3530 | 20933 | 22838 | 6229 | 21318 | 22660 | 6022 | 423.52 | 476.70 |
| 50000 | 1.15 | 0.6500 | 0.3500 | 21125 | 26163 | 6125 | 215.48 | 0.6470 | 0.6530 | 0.3470 | 0.3530 | 20933 | 22838 | 6229 | 21318 | 22660 | 6022 | 487.49 | 544.73 |
| 50000 | 1.16 | 0.6500 | 0.3500 | 21125 | 26390 | 6125 | 243.97 | 0.6470 | 0.6530 | 0.3470 | 0.3530 | 20933 | 22838 | 6229 | 21318 | 22660 | 6022 | 555.99 | 617.33 |
| 50000 | 1.17 | 0.6500 | 0.3500 | 21125 | 26618 | 6125 | 274.07 | 0.6470 | 0.6530 | 0.3470 | 0.3530 | 20933 | 22838 | 6229 | 21318 | 22660 | 6022 | 629.03 | 694.50 |
| 50000 | 1.18 | 0.6500 | 0.3500 | 21125 | 26845 | 6125 | 305.78 | 0.6470 | 0.6530 | 0.3470 | 0.3530 | 20933 | 22838 | 6229 | 21318 | 22660 | 6022 | 706.60 | 776.24 |
| 50000 | 1.19 | 0.6500 | 0.3500 | 21125 | 27073 | 6125 | 339.05 | 0.6470 | 0.6530 | 0.3470 | 0.3530 | 20933 | 22838 | 6229 | 21318 | 22660 | 6022 | 788.70 | 862.55 |
| 50000 | 1.20 | 0.6500 | 0.3500 | 21125 | 27300 | 6125 | 373.89 | 0.6470 | 0.6530 | 0.3470 | 0.3530 | 20933 | 22838 | 6229 | 21318 | 22660 | 6022 | 875.34 | 953.42 |
| 50000 | 0.80 | 0.7000 | 0.3000 | 24500 | 16800 | 4500 | 400.55 | 0.6972 | 0.7028 | 0.2972 | 0.3028 | 24302 | 21113 | 4586 | 24699 | 20886 | 4415 | 884.21 | 802.45 |
| 50000 | 0.81 | 0.7000 | 0.3000 | 24500 | 17010 | 4500 | 359.00 | 0.6972 | 0.7028 | 0.2972 | 0.3028 | 24302 | 21113 | 4586 | 24699 | 20886 | 4415 | 800.51 | 722.40 |
| 50000 | 0.82 | 0.7000 | 0.3000 | 24500 | 17220 | 4500 | 320.00 | 0.6972 | 0.7028 | 0.2972 | 0.3028 | 24302 | 21113 | 4586 | 24699 | 20886 | 4415 | 720.98 | 646.57 |
| 50000 | 0.83 | 0.7000 | 0.3000 | 24500 | 17430 | 4500 | 283.50 | 0.6972 | 0.7028 | 0.2972 | 0.3028 | 24302 | 21113 | 4586 | 24699 | 20886 | 4415 | 645.63 | 574.97 |
| 50000 | 0.84 | 0.7000 | 0.3000 | 24500 | 17640 | 4500 | 249.44 | 0.6972 | 0.7028 | 0.2972 | 0.3028 | 24302 | 21113 | 4586 | 24699 | 20886 | 4415 | 574.45 | 507.59 |
| 50000 | 0.85 | 0.7000 | 0.3000 | 24500 | 17850 | 4500 | 217.78 | 0.6972 | 0.7028 | 0.2972 | 0.3028 | 24302 | 21113 | 4586 | 24699 | 20886 | 4415 | 507.46 | 444.44 |
| 50000 | 0.86 | 0.7000 | 0.3000 | 24500 | 18060 | 4500 | 188.46 | 0.6972 | 0.7028 | 0.2972 | 0.3028 | 24302 | 21113 | 4586 | 24699 | 20886 | 4415 | 444.64 | 385.50 |
| 50000 | 0.87 | 0.7000 | 0.3000 | 24500 | 18270 | 4500 | 161.44 | 0.6972 | 0.7028 | 0.2972 | 0.3028 | 24302 | 21113 | 4586 | 24699 | 20886 | 4415 | 386.00 | 330.80 |
| 50000 | 0.88 | 0.7000 | 0.3000 | 24500 | 18480 | 4500 | 136.67 | 0.6972 | 0.7028 | 0.2972 | 0.3028 | 24302 | 21113 | 4586 | 24699 | 20886 | 4415 | 331.53 | 280.31 |

|       |      |        |        |       |       |      |        |        |        |        |        |       |       |      |       |       |      |        |        |
|-------|------|--------|--------|-------|-------|------|--------|--------|--------|--------|--------|-------|-------|------|-------|-------|------|--------|--------|
| 50000 | 0.89 | 0.7000 | 0.3000 | 24500 | 18690 | 4500 | 114.11 | 0.6972 | 0.7028 | 0.2972 | 0.3028 | 24302 | 21113 | 4586 | 24699 | 20886 | 4415 | 281.25 | 234.04 |
| 50000 | 0.90 | 0.7000 | 0.3000 | 24500 | 18900 | 4500 | 93.71  | 0.6972 | 0.7028 | 0.2972 | 0.3028 | 24302 | 21113 | 4586 | 24699 | 20886 | 4415 | 235.14 | 192.00 |
| 50000 | 0.91 | 0.7000 | 0.3000 | 24500 | 19110 | 4500 | 75.43  | 0.6972 | 0.7028 | 0.2972 | 0.3028 | 24302 | 21113 | 4586 | 24699 | 20886 | 4415 | 193.21 | 154.19 |
| 50000 | 0.92 | 0.7000 | 0.3000 | 24500 | 19320 | 4500 | 59.22  | 0.6972 | 0.7028 | 0.2972 | 0.3028 | 24302 | 21113 | 4586 | 24699 | 20886 | 4415 | 155.46 | 120.59 |
| 50000 | 0.93 | 0.7000 | 0.3000 | 24500 | 19530 | 4500 | 45.06  | 0.6972 | 0.7028 | 0.2972 | 0.3028 | 24302 | 21113 | 4586 | 24699 | 20886 | 4415 | 121.88 | 91.22  |
| 50000 | 0.94 | 0.7000 | 0.3000 | 24500 | 19740 | 4500 | 32.91  | 0.6972 | 0.7028 | 0.2972 | 0.3028 | 24302 | 21113 | 4586 | 24699 | 20886 | 4415 | 92.48  | 66.07  |
| 50000 | 0.95 | 0.7000 | 0.3000 | 24500 | 19950 | 4500 | 22.71  | 0.6972 | 0.7028 | 0.2972 | 0.3028 | 24302 | 21113 | 4586 | 24699 | 20886 | 4415 | 67.26  | 45.15  |
| 50000 | 0.96 | 0.7000 | 0.3000 | 24500 | 20160 | 4500 | 14.45  | 0.6972 | 0.7028 | 0.2972 | 0.3028 | 24302 | 21113 | 4586 | 24699 | 20886 | 4415 | 46.22  | 28.44  |
| 50000 | 0.97 | 0.7000 | 0.3000 | 24500 | 20370 | 4500 | 8.08   | 0.6972 | 0.7028 | 0.2972 | 0.3028 | 24302 | 21113 | 4586 | 24699 | 20886 | 4415 | 29.35  | 15.96  |
| 50000 | 0.98 | 0.7000 | 0.3000 | 24500 | 20580 | 4500 | 3.57   | 0.6972 | 0.7028 | 0.2972 | 0.3028 | 24302 | 21113 | 4586 | 24699 | 20886 | 4415 | 16.66  | 7.71   |
| 50000 | 0.99 | 0.7000 | 0.3000 | 24500 | 20790 | 4500 | 0.89   | 0.6972 | 0.7028 | 0.2972 | 0.3028 | 24302 | 21113 | 4586 | 24699 | 20886 | 4415 | 8.15   | 3.67   |
| 50000 | 1.00 | 0.7000 | 0.3000 | 24500 | 21000 | 4500 | 0.00   | 0.6972 | 0.7028 | 0.2972 | 0.3028 | 24302 | 21113 | 4586 | 24699 | 20886 | 4415 | 3.82   | 3.86   |
| 50000 | 1.01 | 0.7000 | 0.3000 | 24500 | 21210 | 4500 | 0.88   | 0.6972 | 0.7028 | 0.2972 | 0.3028 | 24302 | 21113 | 4586 | 24699 | 20886 | 4415 | 3.67   | 8.28   |
| 50000 | 1.02 | 0.7000 | 0.3000 | 24500 | 21420 | 4500 | 3.49   | 0.6972 | 0.7028 | 0.2972 | 0.3028 | 24302 | 21113 | 4586 | 24699 | 20886 | 4415 | 7.69   | 16.91  |
| 50000 | 1.03 | 0.7000 | 0.3000 | 24500 | 21630 | 4500 | 7.80   | 0.6972 | 0.7028 | 0.2972 | 0.3028 | 24302 | 21113 | 4586 | 24699 | 20886 | 4415 | 15.89  | 29.77  |
| 50000 | 1.04 | 0.7000 | 0.3000 | 24500 | 21840 | 4500 | 13.79  | 0.6972 | 0.7028 | 0.2972 | 0.3028 | 24302 | 21113 | 4586 | 24699 | 20886 | 4415 | 28.27  | 46.85  |
| 50000 | 1.05 | 0.7000 | 0.3000 | 24500 | 22050 | 4500 | 21.43  | 0.6972 | 0.7028 | 0.2972 | 0.3028 | 24302 | 21113 | 4586 | 24699 | 20886 | 4415 | 44.82  | 68.15  |
| 50000 | 1.06 | 0.7000 | 0.3000 | 24500 | 22260 | 4500 | 30.69  | 0.6972 | 0.7028 | 0.2972 | 0.3028 | 24302 | 21113 | 4586 | 24699 | 20886 | 4415 | 65.55  | 93.68  |
| 50000 | 1.07 | 0.7000 | 0.3000 | 24500 | 22470 | 4500 | 41.55  | 0.6972 | 0.7028 | 0.2972 | 0.3028 | 24302 | 21113 | 4586 | 24699 | 20886 | 4415 | 90.46  | 123.43 |
| 50000 | 1.08 | 0.7000 | 0.3000 | 24500 | 22680 | 4500 | 53.97  | 0.6972 | 0.7028 | 0.2972 | 0.3028 | 24302 | 21113 | 4586 | 24699 | 20886 | 4415 | 119.55 | 157.41 |
| 50000 | 1.09 | 0.7000 | 0.3000 | 24500 | 22890 | 4500 | 67.93  | 0.6972 | 0.7028 | 0.2972 | 0.3028 | 24302 | 21113 | 4586 | 24699 | 20886 | 4415 | 152.82 | 195.60 |
| 50000 | 1.10 | 0.7000 | 0.3000 | 24500 | 23100 | 4500 | 83.42  | 0.6972 | 0.7028 | 0.2972 | 0.3028 | 24302 | 21113 | 4586 | 24699 | 20886 | 4415 | 190.26 | 238.02 |
| 50000 | 1.11 | 0.7000 | 0.3000 | 24500 | 23310 | 4500 | 100.40 | 0.6972 | 0.7028 | 0.2972 | 0.3028 | 24302 | 21113 | 4586 | 24699 | 20886 | 4415 | 231.88 | 284.66 |
| 50000 | 1.12 | 0.7000 | 0.3000 | 24500 | 23520 | 4500 | 118.86 | 0.6972 | 0.7028 | 0.2972 | 0.3028 | 24302 | 21113 | 4586 | 24699 | 20886 | 4415 | 277.68 | 335.53 |
| 50000 | 1.13 | 0.7000 | 0.3000 | 24500 | 23730 | 4500 | 138.76 | 0.6972 | 0.7028 | 0.2972 | 0.3028 | 24302 | 21113 | 4586 | 24699 | 20886 | 4415 | 327.65 | 390.62 |
| 50000 | 1.14 | 0.7000 | 0.3000 | 24500 | 23940 | 4500 | 160.09 | 0.6972 | 0.7028 | 0.2972 | 0.3028 | 24302 | 21113 | 4586 | 24699 | 20886 | 4415 | 381.81 | 449.93 |
| 50000 | 1.15 | 0.7000 | 0.3000 | 24500 | 24150 | 4500 | 182.83 | 0.6972 | 0.7028 | 0.2972 | 0.3028 | 24302 | 21113 | 4586 | 24699 | 20886 | 4415 | 440.14 | 513.47 |
| 50000 | 1.16 | 0.7000 | 0.3000 | 24500 | 24360 | 4500 | 206.95 | 0.6972 | 0.7028 | 0.2972 | 0.3028 | 24302 | 21113 | 4586 | 24699 | 20886 | 4415 | 502.64 | 581.22 |
| 50000 | 1.17 | 0.7000 | 0.3000 | 24500 | 24570 | 4500 | 232.44 | 0.6972 | 0.7028 | 0.2972 | 0.3028 | 24302 | 21113 | 4586 | 24699 | 20886 | 4415 | 569.33 | 653.20 |
| 50000 | 1.18 | 0.7000 | 0.3000 | 24500 | 24780 | 4500 | 259.27 | 0.6972 | 0.7028 | 0.2972 | 0.3028 | 24302 | 21113 | 4586 | 24699 | 20886 | 4415 | 640.19 | 729.41 |
| 50000 | 1.19 | 0.7000 | 0.3000 | 24500 | 24990 | 4500 | 287.43 | 0.6972 | 0.7028 | 0.2972 | 0.3028 | 24302 | 21113 | 4586 | 24699 | 20886 | 4415 | 715.23 | 809.83 |
| 50000 | 1.20 | 0.7000 | 0.3000 | 24500 | 25200 | 4500 | 316.90 | 0.6972 | 0.7028 | 0.2972 | 0.3028 | 24302 | 21113 | 4586 | 24699 | 20886 | 4415 | 794.45 | 894.48 |
| 50000 | 0.80 | 0.7500 | 0.2500 | 28125 | 15000 | 3125 | 323.17 | 0.7473 | 0.7527 | 0.2473 | 0.2527 | 27924 | 18883 | 3192 | 28327 | 18615 | 3058 | 801.52 | 704.95 |
| 50000 | 0.81 | 0.7500 | 0.2500 | 28125 | 15188 | 3125 | 289.43 | 0.7473 | 0.7527 | 0.2473 | 0.2527 | 27924 | 18883 | 3192 | 28327 | 18615 | 3058 | 726.27 | 634.01 |
| 50000 | 0.82 | 0.7500 | 0.2500 | 28125 | 15375 | 3125 | 257.79 | 0.7473 | 0.7527 | 0.2473 | 0.2527 | 27924 | 18883 | 3192 | 28327 | 18615 | 3058 | 654.73 | 566.85 |

|       |      |        |        |       |       |      |        |        |        |        |        |       |       |      |       |       |      |        |        |
|-------|------|--------|--------|-------|-------|------|--------|--------|--------|--------|--------|-------|-------|------|-------|-------|------|--------|--------|
| 50000 | 0.83 | 0.7500 | 0.2500 | 28125 | 15563 | 3125 | 228.22 | 0.7473 | 0.7527 | 0.2473 | 0.2527 | 27924 | 18883 | 3192 | 28327 | 18615 | 3058 | 586.92 | 503.47 |
| 50000 | 0.84 | 0.7500 | 0.2500 | 28125 | 15750 | 3125 | 200.66 | 0.7473 | 0.7527 | 0.2473 | 0.2527 | 27924 | 18883 | 3192 | 28327 | 18615 | 3058 | 522.83 | 443.86 |
| 50000 | 0.85 | 0.7500 | 0.2500 | 28125 | 15938 | 3125 | 175.07 | 0.7473 | 0.7527 | 0.2473 | 0.2527 | 27924 | 18883 | 3192 | 28327 | 18615 | 3058 | 462.47 | 388.04 |
| 50000 | 0.86 | 0.7500 | 0.2500 | 28125 | 16125 | 3125 | 151.40 | 0.7473 | 0.7527 | 0.2473 | 0.2527 | 27924 | 18883 | 3192 | 28327 | 18615 | 3058 | 405.82 | 335.98 |
| 50000 | 0.87 | 0.7500 | 0.2500 | 28125 | 16313 | 3125 | 129.61 | 0.7473 | 0.7527 | 0.2473 | 0.2527 | 27924 | 18883 | 3192 | 28327 | 18615 | 3058 | 352.91 | 287.71 |
| 50000 | 0.88 | 0.7500 | 0.2500 | 28125 | 16500 | 3125 | 109.65 | 0.7473 | 0.7527 | 0.2473 | 0.2527 | 27924 | 18883 | 3192 | 28327 | 18615 | 3058 | 303.71 | 243.21 |
| 50000 | 0.89 | 0.7500 | 0.2500 | 28125 | 16688 | 3125 | 91.49  | 0.7473 | 0.7527 | 0.2473 | 0.2527 | 27924 | 18883 | 3192 | 28327 | 18615 | 3058 | 258.24 | 202.49 |
| 50000 | 0.90 | 0.7500 | 0.2500 | 28125 | 16875 | 3125 | 75.09  | 0.7473 | 0.7527 | 0.2473 | 0.2527 | 27924 | 18883 | 3192 | 28327 | 18615 | 3058 | 216.49 | 165.55 |
| 50000 | 0.91 | 0.7500 | 0.2500 | 28125 | 17063 | 3125 | 60.41  | 0.7473 | 0.7527 | 0.2473 | 0.2527 | 27924 | 18883 | 3192 | 28327 | 18615 | 3058 | 178.47 | 132.39 |
| 50000 | 0.92 | 0.7500 | 0.2500 | 28125 | 17250 | 3125 | 47.40  | 0.7473 | 0.7527 | 0.2473 | 0.2527 | 27924 | 18883 | 3192 | 28327 | 18615 | 3058 | 144.17 | 103.00 |
| 50000 | 0.93 | 0.7500 | 0.2500 | 28125 | 17438 | 3125 | 36.05  | 0.7473 | 0.7527 | 0.2473 | 0.2527 | 27924 | 18883 | 3192 | 28327 | 18615 | 3058 | 113.59 | 77.39  |
| 50000 | 0.94 | 0.7500 | 0.2500 | 28125 | 17625 | 3125 | 26.31  | 0.7473 | 0.7527 | 0.2473 | 0.2527 | 27924 | 18883 | 3192 | 28327 | 18615 | 3058 | 86.74  | 55.55  |
| 50000 | 0.95 | 0.7500 | 0.2500 | 28125 | 17813 | 3125 | 18.15  | 0.7473 | 0.7527 | 0.2473 | 0.2527 | 27924 | 18883 | 3192 | 28327 | 18615 | 3058 | 63.61  | 37.50  |
| 50000 | 0.96 | 0.7500 | 0.2500 | 28125 | 18000 | 3125 | 11.54  | 0.7473 | 0.7527 | 0.2473 | 0.2527 | 27924 | 18883 | 3192 | 28327 | 18615 | 3058 | 44.20  | 23.22  |
| 50000 | 0.97 | 0.7500 | 0.2500 | 28125 | 18188 | 3125 | 6.45   | 0.7473 | 0.7527 | 0.2473 | 0.2527 | 27924 | 18883 | 3192 | 28327 | 18615 | 3058 | 28.52  | 12.71  |
| 50000 | 0.98 | 0.7500 | 0.2500 | 28125 | 18375 | 3125 | 2.85   | 0.7473 | 0.7527 | 0.2473 | 0.2527 | 27924 | 18883 | 3192 | 28327 | 18615 | 3058 | 16.56  | 5.99   |
| 50000 | 0.99 | 0.7500 | 0.2500 | 28125 | 18563 | 3125 | 0.71   | 0.7473 | 0.7527 | 0.2473 | 0.2527 | 27924 | 18883 | 3192 | 28327 | 18615 | 3058 | 8.33   | 3.04   |
| 50000 | 1.00 | 0.7500 | 0.2500 | 28125 | 18750 | 3125 | 0.00   | 0.7473 | 0.7527 | 0.2473 | 0.2527 | 27924 | 18883 | 3192 | 28327 | 18615 | 3058 | 3.81   | 3.87   |
| 50000 | 1.01 | 0.7500 | 0.2500 | 28125 | 18938 | 3125 | 0.70   | 0.7473 | 0.7527 | 0.2473 | 0.2527 | 27924 | 18883 | 3192 | 28327 | 18615 | 3058 | 3.03   | 8.48   |
| 50000 | 1.02 | 0.7500 | 0.2500 | 28125 | 19125 | 3125 | 2.78   | 0.7473 | 0.7527 | 0.2473 | 0.2527 | 27924 | 18883 | 3192 | 28327 | 18615 | 3058 | 5.96   | 16.86  |
| 50000 | 1.03 | 0.7500 | 0.2500 | 28125 | 19313 | 3125 | 6.21   | 0.7473 | 0.7527 | 0.2473 | 0.2527 | 27924 | 18883 | 3192 | 28327 | 18615 | 3058 | 12.62  | 29.02  |
| 50000 | 1.04 | 0.7500 | 0.2500 | 28125 | 19500 | 3125 | 10.98  | 0.7473 | 0.7527 | 0.2473 | 0.2527 | 27924 | 18883 | 3192 | 28327 | 18615 | 3058 | 23.00  | 44.96  |
| 50000 | 1.05 | 0.7500 | 0.2500 | 28125 | 19688 | 3125 | 17.05  | 0.7473 | 0.7527 | 0.2473 | 0.2527 | 27924 | 18883 | 3192 | 28327 | 18615 | 3058 | 37.11  | 64.67  |
| 50000 | 1.06 | 0.7500 | 0.2500 | 28125 | 19875 | 3125 | 24.41  | 0.7473 | 0.7527 | 0.2473 | 0.2527 | 27924 | 18883 | 3192 | 28327 | 18615 | 3058 | 54.93  | 88.17  |
| 50000 | 1.07 | 0.7500 | 0.2500 | 28125 | 20063 | 3125 | 33.03  | 0.7473 | 0.7527 | 0.2473 | 0.2527 | 27924 | 18883 | 3192 | 28327 | 18615 | 3058 | 76.49  | 115.43 |
| 50000 | 1.08 | 0.7500 | 0.2500 | 28125 | 20250 | 3125 | 42.88  | 0.7473 | 0.7527 | 0.2473 | 0.2527 | 27924 | 18883 | 3192 | 28327 | 18615 | 3058 | 101.76 | 146.48 |
| 50000 | 1.09 | 0.7500 | 0.2500 | 28125 | 20438 | 3125 | 53.96  | 0.7473 | 0.7527 | 0.2473 | 0.2527 | 27924 | 18883 | 3192 | 28327 | 18615 | 3058 | 130.76 | 181.31 |
| 50000 | 1.10 | 0.7500 | 0.2500 | 28125 | 20625 | 3125 | 66.24  | 0.7473 | 0.7527 | 0.2473 | 0.2527 | 27924 | 18883 | 3192 | 28327 | 18615 | 3058 | 163.48 | 219.91 |
| 50000 | 1.11 | 0.7500 | 0.2500 | 28125 | 20813 | 3125 | 79.70  | 0.7473 | 0.7527 | 0.2473 | 0.2527 | 27924 | 18883 | 3192 | 28327 | 18615 | 3058 | 199.93 | 262.28 |
| 50000 | 1.12 | 0.7500 | 0.2500 | 28125 | 21000 | 3125 | 94.32  | 0.7473 | 0.7527 | 0.2473 | 0.2527 | 27924 | 18883 | 3192 | 28327 | 18615 | 3058 | 240.10 | 308.44 |
| 50000 | 1.13 | 0.7500 | 0.2500 | 28125 | 21188 | 3125 | 110.08 | 0.7473 | 0.7527 | 0.2473 | 0.2527 | 27924 | 18883 | 3192 | 28327 | 18615 | 3058 | 283.99 | 358.37 |
| 50000 | 1.14 | 0.7500 | 0.2500 | 28125 | 21375 | 3125 | 126.96 | 0.7473 | 0.7527 | 0.2473 | 0.2527 | 27924 | 18883 | 3192 | 28327 | 18615 | 3058 | 331.61 | 412.08 |
| 50000 | 1.15 | 0.7500 | 0.2500 | 28125 | 21563 | 3125 | 144.95 | 0.7473 | 0.7527 | 0.2473 | 0.2527 | 27924 | 18883 | 3192 | 28327 | 18615 | 3058 | 382.95 | 469.57 |
| 50000 | 1.16 | 0.7500 | 0.2500 | 28125 | 21750 | 3125 | 164.03 | 0.7473 | 0.7527 | 0.2473 | 0.2527 | 27924 | 18883 | 3192 | 28327 | 18615 | 3058 | 438.01 | 530.83 |
| 50000 | 1.17 | 0.7500 | 0.2500 | 28125 | 21938 | 3125 | 184.18 | 0.7473 | 0.7527 | 0.2473 | 0.2527 | 27924 | 18883 | 3192 | 28327 | 18615 | 3058 | 496.80 | 595.87 |



|       |      |        |        |       |       |      |        |        |        |        |        |       |       |      |       |       |      |        |        |
|-------|------|--------|--------|-------|-------|------|--------|--------|--------|--------|--------|-------|-------|------|-------|-------|------|--------|--------|
| 50000 | 1.18 | 0.7500 | 0.2500 | 28125 | 22125 | 3125 | 205.39 | 0.7473 | 0.7527 | 0.2473 | 0.2527 | 27924 | 18883 | 3192 | 28327 | 18615 | 3058 | 559.31 | 664.69 |
| 50000 | 1.19 | 0.7500 | 0.2500 | 28125 | 22313 | 3125 | 227.63 | 0.7473 | 0.7527 | 0.2473 | 0.2527 | 27924 | 18883 | 3192 | 28327 | 18615 | 3058 | 625.54 | 737.29 |
| 50000 | 1.20 | 0.7500 | 0.2500 | 28125 | 22500 | 3125 | 250.91 | 0.7473 | 0.7527 | 0.2473 | 0.2527 | 27924 | 18883 | 3192 | 28327 | 18615 | 3058 | 695.50 | 813.66 |
| 50000 | 0.80 | 0.8000 | 0.2000 | 32000 | 12800 | 2000 | 238.78 | 0.7975 | 0.8025 | 0.1975 | 0.2025 | 31802 | 16148 | 2050 | 32199 | 15851 | 1951 | 696.65 | 589.60 |
| 50000 | 0.81 | 0.8000 | 0.2000 | 32000 | 12960 | 2000 | 213.64 | 0.7975 | 0.8025 | 0.1975 | 0.2025 | 31802 | 16148 | 2050 | 32199 | 15851 | 1951 | 631.88 | 529.63 |
| 50000 | 0.82 | 0.8000 | 0.2000 | 32000 | 13120 | 2000 | 190.12 | 0.7975 | 0.8025 | 0.1975 | 0.2025 | 31802 | 16148 | 2050 | 32199 | 15851 | 1951 | 570.29 | 472.88 |
| 50000 | 0.83 | 0.8000 | 0.2000 | 32000 | 13280 | 2000 | 168.17 | 0.7975 | 0.8025 | 0.1975 | 0.2025 | 31802 | 16148 | 2050 | 32199 | 15851 | 1951 | 511.87 | 419.37 |
| 50000 | 0.84 | 0.8000 | 0.2000 | 32000 | 13440 | 2000 | 147.73 | 0.7975 | 0.8025 | 0.1975 | 0.2025 | 31802 | 16148 | 2050 | 32199 | 15851 | 1951 | 456.62 | 369.09 |
| 50000 | 0.85 | 0.8000 | 0.2000 | 32000 | 13600 | 2000 | 128.78 | 0.7975 | 0.8025 | 0.1975 | 0.2025 | 31802 | 16148 | 2050 | 32199 | 15851 | 1951 | 404.54 | 322.04 |
| 50000 | 0.86 | 0.8000 | 0.2000 | 32000 | 13760 | 2000 | 111.28 | 0.7975 | 0.8025 | 0.1975 | 0.2025 | 31802 | 16148 | 2050 | 32199 | 15851 | 1951 | 355.63 | 278.22 |
| 50000 | 0.87 | 0.8000 | 0.2000 | 32000 | 13920 | 2000 | 95.19  | 0.7975 | 0.8025 | 0.1975 | 0.2025 | 31802 | 16148 | 2050 | 32199 | 15851 | 1951 | 309.89 | 237.62 |
| 50000 | 0.88 | 0.8000 | 0.2000 | 32000 | 14080 | 2000 | 80.47  | 0.7975 | 0.8025 | 0.1975 | 0.2025 | 31802 | 16148 | 2050 | 32199 | 15851 | 1951 | 267.32 | 200.26 |
| 50000 | 0.89 | 0.8000 | 0.2000 | 32000 | 14240 | 2000 | 67.09  | 0.7975 | 0.8025 | 0.1975 | 0.2025 | 31802 | 16148 | 2050 | 32199 | 15851 | 1951 | 227.92 | 166.13 |
| 50000 | 0.90 | 0.8000 | 0.2000 | 32000 | 14400 | 2000 | 55.03  | 0.7975 | 0.8025 | 0.1975 | 0.2025 | 31802 | 16148 | 2050 | 32199 | 15851 | 1951 | 191.69 | 135.23 |
| 50000 | 0.91 | 0.8000 | 0.2000 | 32000 | 14560 | 2000 | 44.23  | 0.7975 | 0.8025 | 0.1975 | 0.2025 | 31802 | 16148 | 2050 | 32199 | 15851 | 1951 | 158.64 | 107.56 |
| 50000 | 0.92 | 0.8000 | 0.2000 | 32000 | 14720 | 2000 | 34.69  | 0.7975 | 0.8025 | 0.1975 | 0.2025 | 31802 | 16148 | 2050 | 32199 | 15851 | 1951 | 128.75 | 83.12  |
| 50000 | 0.93 | 0.8000 | 0.2000 | 32000 | 14880 | 2000 | 26.36  | 0.7975 | 0.8025 | 0.1975 | 0.2025 | 31802 | 16148 | 2050 | 32199 | 15851 | 1951 | 102.04 | 61.91  |
| 50000 | 0.94 | 0.8000 | 0.2000 | 32000 | 15040 | 2000 | 19.23  | 0.7975 | 0.8025 | 0.1975 | 0.2025 | 31802 | 16148 | 2050 | 32199 | 15851 | 1951 | 78.49  | 43.93  |
| 50000 | 0.95 | 0.8000 | 0.2000 | 32000 | 15200 | 2000 | 13.26  | 0.7975 | 0.8025 | 0.1975 | 0.2025 | 31802 | 16148 | 2050 | 32199 | 15851 | 1951 | 58.12  | 29.18  |
| 50000 | 0.96 | 0.8000 | 0.2000 | 32000 | 15360 | 2000 | 8.42   | 0.7975 | 0.8025 | 0.1975 | 0.2025 | 31802 | 16148 | 2050 | 32199 | 15851 | 1951 | 40.91  | 17.66  |
| 50000 | 0.97 | 0.8000 | 0.2000 | 32000 | 15520 | 2000 | 4.70   | 0.7975 | 0.8025 | 0.1975 | 0.2025 | 31802 | 16148 | 2050 | 32199 | 15851 | 1951 | 26.88  | 9.37   |
| 50000 | 0.98 | 0.8000 | 0.2000 | 32000 | 15680 | 2000 | 2.08   | 0.7975 | 0.8025 | 0.1975 | 0.2025 | 31802 | 16148 | 2050 | 32199 | 15851 | 1951 | 16.02  | 4.31   |
| 50000 | 0.99 | 0.8000 | 0.2000 | 32000 | 15840 | 2000 | 0.52   | 0.7975 | 0.8025 | 0.1975 | 0.2025 | 31802 | 16148 | 2050 | 32199 | 15851 | 1951 | 8.33   | 2.48   |
| 50000 | 1.00 | 0.8000 | 0.2000 | 32000 | 16000 | 2000 | 0.00   | 0.7975 | 0.8025 | 0.1975 | 0.2025 | 31802 | 16148 | 2050 | 32199 | 15851 | 1951 | 3.81   | 3.88   |
| 50000 | 1.01 | 0.8000 | 0.2000 | 32000 | 16160 | 2000 | 0.51   | 0.7975 | 0.8025 | 0.1975 | 0.2025 | 31802 | 16148 | 2050 | 32199 | 15851 | 1951 | 2.46   | 8.51   |
| 50000 | 1.02 | 0.8000 | 0.2000 | 32000 | 16320 | 2000 | 2.02   | 0.7975 | 0.8025 | 0.1975 | 0.2025 | 31802 | 16148 | 2050 | 32199 | 15851 | 1951 | 4.28   | 16.37  |
| 50000 | 1.03 | 0.8000 | 0.2000 | 32000 | 16480 | 2000 | 4.52   | 0.7975 | 0.8025 | 0.1975 | 0.2025 | 31802 | 16148 | 2050 | 32199 | 15851 | 1951 | 9.27   | 27.46  |
| 50000 | 1.04 | 0.8000 | 0.2000 | 32000 | 16640 | 2000 | 7.98   | 0.7975 | 0.8025 | 0.1975 | 0.2025 | 31802 | 16148 | 2050 | 32199 | 15851 | 1951 | 17.43  | 41.78  |
| 50000 | 1.05 | 0.8000 | 0.2000 | 32000 | 16800 | 2000 | 12.38  | 0.7975 | 0.8025 | 0.1975 | 0.2025 | 31802 | 16148 | 2050 | 32199 | 15851 | 1951 | 28.76  | 59.33  |
| 50000 | 1.06 | 0.8000 | 0.2000 | 32000 | 16960 | 2000 | 17.72  | 0.7975 | 0.8025 | 0.1975 | 0.2025 | 31802 | 16148 | 2050 | 32199 | 15851 | 1951 | 43.26  | 80.11  |
| 50000 | 1.07 | 0.8000 | 0.2000 | 32000 | 17120 | 2000 | 23.96  | 0.7975 | 0.8025 | 0.1975 | 0.2025 | 31802 | 16148 | 2050 | 32199 | 15851 | 1951 | 60.94  | 104.13 |
| 50000 | 1.08 | 0.8000 | 0.2000 | 32000 | 17280 | 2000 | 31.10  | 0.7975 | 0.8025 | 0.1975 | 0.2025 | 31802 | 16148 | 2050 | 32199 | 15851 | 1951 | 81.78  | 131.37 |
| 50000 | 1.09 | 0.8000 | 0.2000 | 32000 | 17440 | 2000 | 39.12  | 0.7975 | 0.8025 | 0.1975 | 0.2025 | 31802 | 16148 | 2050 | 32199 | 15851 | 1951 | 105.80 | 161.84 |
| 50000 | 1.10 | 0.8000 | 0.2000 | 32000 | 17600 | 2000 | 48.00  | 0.7975 | 0.8025 | 0.1975 | 0.2025 | 31802 | 16148 | 2050 | 32199 | 15851 | 1951 | 132.98 | 195.54 |
| 50000 | 1.11 | 0.8000 | 0.2000 | 32000 | 17760 | 2000 | 57.73  | 0.7975 | 0.8025 | 0.1975 | 0.2025 | 31802 | 16148 | 2050 | 32199 | 15851 | 1951 | 163.34 | 232.47 |

|       |      |        |        |       |       |      |        |        |        |        |        |       |       |      |       |       |      |        |        |
|-------|------|--------|--------|-------|-------|------|--------|--------|--------|--------|--------|-------|-------|------|-------|-------|------|--------|--------|
| 50000 | 1.12 | 0.8000 | 0.2000 | 32000 | 17920 | 2000 | 68.29  | 0.7975 | 0.8025 | 0.1975 | 0.2025 | 31802 | 16148 | 2050 | 32199 | 15851 | 1951 | 196.87 | 272.64 |
| 50000 | 1.13 | 0.8000 | 0.2000 | 32000 | 18080 | 2000 | 79.68  | 0.7975 | 0.8025 | 0.1975 | 0.2025 | 31802 | 16148 | 2050 | 32199 | 15851 | 1951 | 233.56 | 316.03 |
| 50000 | 1.14 | 0.8000 | 0.2000 | 32000 | 18240 | 2000 | 91.86  | 0.7975 | 0.8025 | 0.1975 | 0.2025 | 31802 | 16148 | 2050 | 32199 | 15851 | 1951 | 273.43 | 362.65 |
| 50000 | 1.15 | 0.8000 | 0.2000 | 32000 | 18400 | 2000 | 104.84 | 0.7975 | 0.8025 | 0.1975 | 0.2025 | 31802 | 16148 | 2050 | 32199 | 15851 | 1951 | 316.47 | 412.50 |
| 50000 | 1.16 | 0.8000 | 0.2000 | 32000 | 18560 | 2000 | 118.59 | 0.7975 | 0.8025 | 0.1975 | 0.2025 | 31802 | 16148 | 2050 | 32199 | 15851 | 1951 | 362.68 | 465.59 |
| 50000 | 1.17 | 0.8000 | 0.2000 | 32000 | 18720 | 2000 | 133.12 | 0.7975 | 0.8025 | 0.1975 | 0.2025 | 31802 | 16148 | 2050 | 32199 | 15851 | 1951 | 412.06 | 521.90 |
| 50000 | 1.18 | 0.8000 | 0.2000 | 32000 | 18880 | 2000 | 148.39 | 0.7975 | 0.8025 | 0.1975 | 0.2025 | 31802 | 16148 | 2050 | 32199 | 15851 | 1951 | 464.61 | 581.44 |
| 50000 | 1.19 | 0.8000 | 0.2000 | 32000 | 19040 | 2000 | 164.41 | 0.7975 | 0.8025 | 0.1975 | 0.2025 | 31802 | 16148 | 2050 | 32199 | 15851 | 1951 | 520.33 | 644.22 |
| 50000 | 1.20 | 0.8000 | 0.2000 | 32000 | 19200 | 2000 | 181.16 | 0.7975 | 0.8025 | 0.1975 | 0.2025 | 31802 | 16148 | 2050 | 32199 | 15851 | 1951 | 579.22 | 710.22 |
| 50000 | 0.80 | 0.8500 | 0.1500 | 36125 | 10200 | 1125 | 154.23 | 0.8478 | 0.8522 | 0.1478 | 0.1522 | 35937 | 12904 | 1158 | 36313 | 12595 | 1092 | 568.73 | 457.25 |
| 50000 | 0.81 | 0.8500 | 0.1500 | 36125 | 10328 | 1125 | 137.85 | 0.8478 | 0.8522 | 0.1478 | 0.1522 | 35937 | 12904 | 1158 | 36313 | 12595 | 1092 | 516.54 | 410.06 |
| 50000 | 0.82 | 0.8500 | 0.1500 | 36125 | 10455 | 1125 | 122.54 | 0.8478 | 0.8522 | 0.1478 | 0.1522 | 35937 | 12904 | 1158 | 36313 | 12595 | 1092 | 466.88 | 365.45 |
| 50000 | 0.83 | 0.8500 | 0.1500 | 36125 | 10583 | 1125 | 108.28 | 0.8478 | 0.8522 | 0.1478 | 0.1522 | 35937 | 12904 | 1158 | 36313 | 12595 | 1092 | 419.74 | 323.42 |
| 50000 | 0.84 | 0.8500 | 0.1500 | 36125 | 10710 | 1125 | 95.03  | 0.8478 | 0.8522 | 0.1478 | 0.1522 | 35937 | 12904 | 1158 | 36313 | 12595 | 1092 | 375.12 | 283.97 |
| 50000 | 0.85 | 0.8500 | 0.1500 | 36125 | 10838 | 1125 | 82.76  | 0.8478 | 0.8522 | 0.1478 | 0.1522 | 35937 | 12904 | 1158 | 36313 | 12595 | 1092 | 333.01 | 247.11 |
| 50000 | 0.86 | 0.8500 | 0.1500 | 36125 | 10965 | 1125 | 71.44  | 0.8478 | 0.8522 | 0.1478 | 0.1522 | 35937 | 12904 | 1158 | 36313 | 12595 | 1092 | 293.43 | 212.82 |
| 50000 | 0.87 | 0.8500 | 0.1500 | 36125 | 11093 | 1125 | 61.06  | 0.8478 | 0.8522 | 0.1478 | 0.1522 | 35937 | 12904 | 1158 | 36313 | 12595 | 1092 | 256.36 | 181.12 |
| 50000 | 0.88 | 0.8500 | 0.1500 | 36125 | 11220 | 1125 | 51.57  | 0.8478 | 0.8522 | 0.1478 | 0.1522 | 35937 | 12904 | 1158 | 36313 | 12595 | 1092 | 221.82 | 152.00 |
| 50000 | 0.89 | 0.8500 | 0.1500 | 36125 | 11348 | 1125 | 42.96  | 0.8478 | 0.8522 | 0.1478 | 0.1522 | 35937 | 12904 | 1158 | 36313 | 12595 | 1092 | 189.79 | 125.46 |
| 50000 | 0.90 | 0.8500 | 0.1500 | 36125 | 11475 | 1125 | 35.20  | 0.8478 | 0.8522 | 0.1478 | 0.1522 | 35937 | 12904 | 1158 | 36313 | 12595 | 1092 | 160.29 | 101.50 |
| 50000 | 0.91 | 0.8500 | 0.1500 | 36125 | 11603 | 1125 | 28.27  | 0.8478 | 0.8522 | 0.1478 | 0.1522 | 35937 | 12904 | 1158 | 36313 | 12595 | 1092 | 133.30 | 80.12  |
| 50000 | 0.92 | 0.8500 | 0.1500 | 36125 | 11730 | 1125 | 22.16  | 0.8478 | 0.8522 | 0.1478 | 0.1522 | 35937 | 12904 | 1158 | 36313 | 12595 | 1092 | 108.83 | 61.32  |
| 50000 | 0.93 | 0.8500 | 0.1500 | 36125 | 11858 | 1125 | 16.82  | 0.8478 | 0.8522 | 0.1478 | 0.1522 | 35937 | 12904 | 1158 | 36313 | 12595 | 1092 | 86.88  | 45.11  |
| 50000 | 0.94 | 0.8500 | 0.1500 | 36125 | 11985 | 1125 | 12.26  | 0.8478 | 0.8522 | 0.1478 | 0.1522 | 35937 | 12904 | 1158 | 36313 | 12595 | 1092 | 67.46  | 31.48  |
| 50000 | 0.95 | 0.8500 | 0.1500 | 36125 | 12113 | 1125 | 8.45   | 0.8478 | 0.8522 | 0.1478 | 0.1522 | 35937 | 12904 | 1158 | 36313 | 12595 | 1092 | 50.55  | 20.42  |
| 50000 | 0.96 | 0.8500 | 0.1500 | 36125 | 12240 | 1125 | 5.36   | 0.8478 | 0.8522 | 0.1478 | 0.1522 | 35937 | 12904 | 1158 | 36313 | 12595 | 1092 | 36.16  | 11.95  |
| 50000 | 0.97 | 0.8500 | 0.1500 | 36125 | 12368 | 1125 | 2.99   | 0.8478 | 0.8522 | 0.1478 | 0.1522 | 35937 | 12904 | 1158 | 36313 | 12595 | 1092 | 24.29  | 6.07   |
| 50000 | 0.98 | 0.8500 | 0.1500 | 36125 | 12495 | 1125 | 1.32   | 0.8478 | 0.8522 | 0.1478 | 0.1522 | 35937 | 12904 | 1158 | 36313 | 12595 | 1092 | 14.94  | 2.76   |
| 50000 | 0.99 | 0.8500 | 0.1500 | 36125 | 12623 | 1125 | 0.33   | 0.8478 | 0.8522 | 0.1478 | 0.1522 | 35937 | 12904 | 1158 | 36313 | 12595 | 1092 | 8.11   | 2.03   |
| 50000 | 1.00 | 0.8500 | 0.1500 | 36125 | 12750 | 1125 | 0.00   | 0.8478 | 0.8522 | 0.1478 | 0.1522 | 35937 | 12904 | 1158 | 36313 | 12595 | 1092 | 3.80   | 3.89   |
| 50000 | 1.01 | 0.8500 | 0.1500 | 36125 | 12878 | 1125 | 0.32   | 0.8478 | 0.8522 | 0.1478 | 0.1522 | 35937 | 12904 | 1158 | 36313 | 12595 | 1092 | 2.00   | 8.33   |
| 50000 | 1.02 | 0.8500 | 0.1500 | 36125 | 13005 | 1125 | 1.28   | 0.8478 | 0.8522 | 0.1478 | 0.1522 | 35937 | 12904 | 1158 | 36313 | 12595 | 1092 | 2.73   | 15.35  |
| 50000 | 1.03 | 0.8500 | 0.1500 | 36125 | 13133 | 1125 | 2.86   | 0.8478 | 0.8522 | 0.1478 | 0.1522 | 35937 | 12904 | 1158 | 36313 | 12595 | 1092 | 5.98   | 24.95  |
| 50000 | 1.04 | 0.8500 | 0.1500 | 36125 | 13260 | 1125 | 5.05   | 0.8478 | 0.8522 | 0.1478 | 0.1522 | 35937 | 12904 | 1158 | 36313 | 12595 | 1092 | 11.74  | 37.13  |
| 50000 | 1.05 | 0.8500 | 0.1500 | 36125 | 13388 | 1125 | 7.84   | 0.8478 | 0.8522 | 0.1478 | 0.1522 | 35937 | 12904 | 1158 | 36313 | 12595 | 1092 | 20.03  | 51.89  |

|       |      |        |        |       |       |      |        |        |        |        |        |       |       |      |       |       |      |        |        |
|-------|------|--------|--------|-------|-------|------|--------|--------|--------|--------|--------|-------|-------|------|-------|-------|------|--------|--------|
| 50000 | 1.06 | 0.8500 | 0.1500 | 36125 | 13515 | 1125 | 11.21  | 0.8478 | 0.8522 | 0.1478 | 0.1522 | 35937 | 12904 | 1158 | 36313 | 12595 | 1092 | 30.84  | 69.23  |
| 50000 | 1.07 | 0.8500 | 0.1500 | 36125 | 13643 | 1125 | 15.15  | 0.8478 | 0.8522 | 0.1478 | 0.1522 | 35937 | 12904 | 1158 | 36313 | 12595 | 1092 | 44.16  | 89.16  |
| 50000 | 1.08 | 0.8500 | 0.1500 | 36125 | 13770 | 1125 | 19.66  | 0.8478 | 0.8522 | 0.1478 | 0.1522 | 35937 | 12904 | 1158 | 36313 | 12595 | 1092 | 60.01  | 111.67 |
| 50000 | 1.09 | 0.8500 | 0.1500 | 36125 | 13898 | 1125 | 24.71  | 0.8478 | 0.8522 | 0.1478 | 0.1522 | 35937 | 12904 | 1158 | 36313 | 12595 | 1092 | 78.37  | 136.76 |
| 50000 | 1.10 | 0.8500 | 0.1500 | 36125 | 14025 | 1125 | 30.31  | 0.8478 | 0.8522 | 0.1478 | 0.1522 | 35937 | 12904 | 1158 | 36313 | 12595 | 1092 | 99.25  | 164.43 |
| 50000 | 1.11 | 0.8500 | 0.1500 | 36125 | 14153 | 1125 | 36.43  | 0.8478 | 0.8522 | 0.1478 | 0.1522 | 35937 | 12904 | 1158 | 36313 | 12595 | 1092 | 122.66 | 194.68 |
| 50000 | 1.12 | 0.8500 | 0.1500 | 36125 | 14280 | 1125 | 43.08  | 0.8478 | 0.8522 | 0.1478 | 0.1522 | 35937 | 12904 | 1158 | 36313 | 12595 | 1092 | 148.58 | 227.51 |
| 50000 | 1.13 | 0.8500 | 0.1500 | 36125 | 14408 | 1125 | 50.23  | 0.8478 | 0.8522 | 0.1478 | 0.1522 | 35937 | 12904 | 1158 | 36313 | 12595 | 1092 | 177.02 | 262.93 |
| 50000 | 1.14 | 0.8500 | 0.1500 | 36125 | 14535 | 1125 | 57.89  | 0.8478 | 0.8522 | 0.1478 | 0.1522 | 35937 | 12904 | 1158 | 36313 | 12595 | 1092 | 207.98 | 300.92 |
| 50000 | 1.15 | 0.8500 | 0.1500 | 36125 | 14663 | 1125 | 66.04  | 0.8478 | 0.8522 | 0.1478 | 0.1522 | 35937 | 12904 | 1158 | 36313 | 12595 | 1092 | 241.46 | 341.50 |
| 50000 | 1.16 | 0.8500 | 0.1500 | 36125 | 14790 | 1125 | 74.67  | 0.8478 | 0.8522 | 0.1478 | 0.1522 | 35937 | 12904 | 1158 | 36313 | 12595 | 1092 | 277.46 | 384.66 |
| 50000 | 1.17 | 0.8500 | 0.1500 | 36125 | 14918 | 1125 | 83.78  | 0.8478 | 0.8522 | 0.1478 | 0.1522 | 35937 | 12904 | 1158 | 36313 | 12595 | 1092 | 315.98 | 430.40 |
| 50000 | 1.18 | 0.8500 | 0.1500 | 36125 | 15045 | 1125 | 93.36  | 0.8478 | 0.8522 | 0.1478 | 0.1522 | 35937 | 12904 | 1158 | 36313 | 12595 | 1092 | 357.02 | 478.72 |
| 50000 | 1.19 | 0.8500 | 0.1500 | 36125 | 15173 | 1125 | 103.39 | 0.8478 | 0.8522 | 0.1478 | 0.1522 | 35937 | 12904 | 1158 | 36313 | 12595 | 1092 | 400.58 | 529.63 |
| 50000 | 1.20 | 0.8500 | 0.1500 | 36125 | 15300 | 1125 | 113.88 | 0.8478 | 0.8522 | 0.1478 | 0.1522 | 35937 | 12904 | 1158 | 36313 | 12595 | 1092 | 446.66 | 583.11 |
| 50000 | 0.80 | 0.9000 | 0.1000 | 40500 | 7200  | 500  | 78.35  | 0.8981 | 0.9019 | 0.0981 | 0.1019 | 40333 | 9148  | 519  | 40668 | 8851  | 482  | 416.34 | 309.33 |
| 50000 | 0.81 | 0.9000 | 0.1000 | 40500 | 7290  | 500  | 69.95  | 0.8981 | 0.9019 | 0.0981 | 0.1019 | 40333 | 9148  | 519  | 40668 | 8851  | 482  | 378.89 | 276.67 |
| 50000 | 0.82 | 0.9000 | 0.1000 | 40500 | 7380  | 500  | 62.11  | 0.8981 | 0.9019 | 0.0981 | 0.1019 | 40333 | 9148  | 519  | 40668 | 8851  | 482  | 343.21 | 245.84 |
| 50000 | 0.83 | 0.9000 | 0.1000 | 40500 | 7470  | 500  | 54.81  | 0.8981 | 0.9019 | 0.0981 | 0.1019 | 40333 | 9148  | 519  | 40668 | 8851  | 482  | 309.30 | 216.84 |
| 50000 | 0.84 | 0.9000 | 0.1000 | 40500 | 7560  | 500  | 48.05  | 0.8981 | 0.9019 | 0.0981 | 0.1019 | 40333 | 9148  | 519  | 40668 | 8851  | 482  | 277.16 | 189.67 |
| 50000 | 0.85 | 0.9000 | 0.1000 | 40500 | 7650  | 500  | 41.80  | 0.8981 | 0.9019 | 0.0981 | 0.1019 | 40333 | 9148  | 519  | 40668 | 8851  | 482  | 246.79 | 164.33 |
| 50000 | 0.86 | 0.9000 | 0.1000 | 40500 | 7740  | 500  | 36.05  | 0.8981 | 0.9019 | 0.0981 | 0.1019 | 40333 | 9148  | 519  | 40668 | 8851  | 482  | 218.20 | 140.83 |
| 50000 | 0.87 | 0.9000 | 0.1000 | 40500 | 7830  | 500  | 30.77  | 0.8981 | 0.9019 | 0.0981 | 0.1019 | 40333 | 9148  | 519  | 40668 | 8851  | 482  | 191.37 | 119.15 |
| 50000 | 0.88 | 0.9000 | 0.1000 | 40500 | 7920  | 500  | 25.97  | 0.8981 | 0.9019 | 0.0981 | 0.1019 | 40333 | 9148  | 519  | 40668 | 8851  | 482  | 166.32 | 99.30  |
| 50000 | 0.89 | 0.9000 | 0.1000 | 40500 | 8010  | 500  | 21.61  | 0.8981 | 0.9019 | 0.0981 | 0.1019 | 40333 | 9148  | 519  | 40668 | 8851  | 482  | 143.03 | 81.29  |
| 50000 | 0.90 | 0.9000 | 0.1000 | 40500 | 8100  | 500  | 17.69  | 0.8981 | 0.9019 | 0.0981 | 0.1019 | 40333 | 9148  | 519  | 40668 | 8851  | 482  | 121.52 | 65.10  |
| 50000 | 0.91 | 0.9000 | 0.1000 | 40500 | 8190  | 500  | 14.19  | 0.8981 | 0.9019 | 0.0981 | 0.1019 | 40333 | 9148  | 519  | 40668 | 8851  | 482  | 101.78 | 50.74  |
| 50000 | 0.92 | 0.9000 | 0.1000 | 40500 | 8280  | 500  | 11.11  | 0.8981 | 0.9019 | 0.0981 | 0.1019 | 40333 | 9148  | 519  | 40668 | 8851  | 482  | 83.80  | 38.22  |
| 50000 | 0.93 | 0.9000 | 0.1000 | 40500 | 8370  | 500  | 8.43   | 0.8981 | 0.9019 | 0.0981 | 0.1019 | 40333 | 9148  | 519  | 40668 | 8851  | 482  | 67.60  | 27.52  |
| 50000 | 0.94 | 0.9000 | 0.1000 | 40500 | 8460  | 500  | 6.14   | 0.8981 | 0.9019 | 0.0981 | 0.1019 | 40333 | 9148  | 519  | 40668 | 8851  | 482  | 53.17  | 18.66  |
| 50000 | 0.95 | 0.9000 | 0.1000 | 40500 | 8550  | 500  | 4.23   | 0.8981 | 0.9019 | 0.0981 | 0.1019 | 40333 | 9148  | 519  | 40668 | 8851  | 482  | 40.51  | 11.62  |
| 50000 | 0.96 | 0.9000 | 0.1000 | 40500 | 8640  | 500  | 2.68   | 0.8981 | 0.9019 | 0.0981 | 0.1019 | 40333 | 9148  | 519  | 40668 | 8851  | 482  | 29.63  | 6.42   |
| 50000 | 0.97 | 0.9000 | 0.1000 | 40500 | 8730  | 500  | 1.50   | 0.8981 | 0.9019 | 0.0981 | 0.1019 | 40333 | 9148  | 519  | 40668 | 8851  | 482  | 20.51  | 3.05   |
| 50000 | 0.98 | 0.9000 | 0.1000 | 40500 | 8820  | 500  | 0.66   | 0.8981 | 0.9019 | 0.0981 | 0.1019 | 40333 | 9148  | 519  | 40668 | 8851  | 482  | 13.16  | 1.50   |
| 50000 | 0.99 | 0.9000 | 0.1000 | 40500 | 8910  | 500  | 0.16   | 0.8981 | 0.9019 | 0.0981 | 0.1019 | 40333 | 9148  | 519  | 40668 | 8851  | 482  | 7.58   | 1.79   |

|       |      |        |        |       |       |     |       |        |        |        |        |       |      |     |       |      |     |        |        |
|-------|------|--------|--------|-------|-------|-----|-------|--------|--------|--------|--------|-------|------|-----|-------|------|-----|--------|--------|
| 50000 | 1.00 | 0.9000 | 0.1000 | 40500 | 9000  | 500 | 0.00  | 0.8981 | 0.9019 | 0.0981 | 0.1019 | 40333 | 9148 | 519 | 40668 | 8851 | 482 | 3.78   | 3.91   |
| 50000 | 1.01 | 0.9000 | 0.1000 | 40500 | 9090  | 500 | 0.16  | 0.8981 | 0.9019 | 0.0981 | 0.1019 | 40333 | 9148 | 519 | 40668 | 8851 | 482 | 1.74   | 7.85   |
| 50000 | 1.02 | 0.9000 | 0.1000 | 40500 | 9180  | 500 | 0.64  | 0.8981 | 0.9019 | 0.0981 | 0.1019 | 40333 | 9148 | 519 | 40668 | 8851 | 482 | 1.48   | 13.63  |
| 50000 | 1.03 | 0.9000 | 0.1000 | 40500 | 9270  | 500 | 1.42  | 0.8981 | 0.9019 | 0.0981 | 0.1019 | 40333 | 9148 | 519 | 40668 | 8851 | 482 | 2.99   | 21.24  |
| 50000 | 1.04 | 0.9000 | 0.1000 | 40500 | 9360  | 500 | 2.51  | 0.8981 | 0.9019 | 0.0981 | 0.1019 | 40333 | 9148 | 519 | 40668 | 8851 | 482 | 6.27   | 30.68  |
| 50000 | 1.05 | 0.9000 | 0.1000 | 40500 | 9450  | 500 | 3.89  | 0.8981 | 0.9019 | 0.0981 | 0.1019 | 40333 | 9148 | 519 | 40668 | 8851 | 482 | 11.31  | 41.95  |
| 50000 | 1.06 | 0.9000 | 0.1000 | 40500 | 9540  | 500 | 5.56  | 0.8981 | 0.9019 | 0.0981 | 0.1019 | 40333 | 9148 | 519 | 40668 | 8851 | 482 | 18.13  | 55.05  |
| 50000 | 1.07 | 0.9000 | 0.1000 | 40500 | 9630  | 500 | 7.51  | 0.8981 | 0.9019 | 0.0981 | 0.1019 | 40333 | 9148 | 519 | 40668 | 8851 | 482 | 26.72  | 69.97  |
| 50000 | 1.08 | 0.9000 | 0.1000 | 40500 | 9720  | 500 | 9.74  | 0.8981 | 0.9019 | 0.0981 | 0.1019 | 40333 | 9148 | 519 | 40668 | 8851 | 482 | 37.08  | 86.73  |
| 50000 | 1.09 | 0.9000 | 0.1000 | 40500 | 9810  | 500 | 12.24 | 0.8981 | 0.9019 | 0.0981 | 0.1019 | 40333 | 9148 | 519 | 40668 | 8851 | 482 | 49.22  | 105.32 |
| 50000 | 1.10 | 0.9000 | 0.1000 | 40500 | 9900  | 500 | 15.00 | 0.8981 | 0.9019 | 0.0981 | 0.1019 | 40333 | 9148 | 519 | 40668 | 8851 | 482 | 63.12  | 125.74 |
| 50000 | 1.11 | 0.9000 | 0.1000 | 40500 | 9990  | 500 | 18.02 | 0.8981 | 0.9019 | 0.0981 | 0.1019 | 40333 | 9148 | 519 | 40668 | 8851 | 482 | 78.79  | 148.00 |
| 50000 | 1.12 | 0.9000 | 0.1000 | 40500 | 10080 | 500 | 21.30 | 0.8981 | 0.9019 | 0.0981 | 0.1019 | 40333 | 9148 | 519 | 40668 | 8851 | 482 | 96.24  | 172.08 |
| 50000 | 1.13 | 0.9000 | 0.1000 | 40500 | 10170 | 500 | 24.82 | 0.8981 | 0.9019 | 0.0981 | 0.1019 | 40333 | 9148 | 519 | 40668 | 8851 | 482 | 115.45 | 197.99 |
| 50000 | 1.14 | 0.9000 | 0.1000 | 40500 | 10260 | 500 | 28.59 | 0.8981 | 0.9019 | 0.0981 | 0.1019 | 40333 | 9148 | 519 | 40668 | 8851 | 482 | 136.44 | 225.73 |
| 50000 | 1.15 | 0.9000 | 0.1000 | 40500 | 10350 | 500 | 32.60 | 0.8981 | 0.9019 | 0.0981 | 0.1019 | 40333 | 9148 | 519 | 40668 | 8851 | 482 | 159.19 | 255.30 |
| 50000 | 1.16 | 0.9000 | 0.1000 | 40500 | 10440 | 500 | 36.84 | 0.8981 | 0.9019 | 0.0981 | 0.1019 | 40333 | 9148 | 519 | 40668 | 8851 | 482 | 183.72 | 286.70 |
| 50000 | 1.17 | 0.9000 | 0.1000 | 40500 | 10530 | 500 | 41.31 | 0.8981 | 0.9019 | 0.0981 | 0.1019 | 40333 | 9148 | 519 | 40668 | 8851 | 482 | 210.02 | 319.94 |
| 50000 | 1.18 | 0.9000 | 0.1000 | 40500 | 10620 | 500 | 46.01 | 0.8981 | 0.9019 | 0.0981 | 0.1019 | 40333 | 9148 | 519 | 40668 | 8851 | 482 | 238.09 | 355.00 |
| 50000 | 1.19 | 0.9000 | 0.1000 | 40500 | 10710 | 500 | 50.93 | 0.8981 | 0.9019 | 0.0981 | 0.1019 | 40333 | 9148 | 519 | 40668 | 8851 | 482 | 267.93 | 391.89 |
| 50000 | 1.20 | 0.9000 | 0.1000 | 40500 | 10800 | 500 | 56.07 | 0.8981 | 0.9019 | 0.0981 | 0.1019 | 40333 | 9148 | 519 | 40668 | 8851 | 482 | 299.54 | 430.62 |
| 50000 | 0.80 | 0.9500 | 0.0500 | 45125 | 3800  | 125 | 22.30 | 0.9486 | 0.9514 | 0.0486 | 0.0514 | 44997 | 4871 | 132 | 45253 | 4628 | 118 | 236.36 | 148.96 |
| 50000 | 0.81 | 0.9500 | 0.0500 | 45125 | 3848  | 125 | 19.88 | 0.9486 | 0.9514 | 0.0486 | 0.0514 | 44997 | 4871 | 132 | 45253 | 4628 | 118 | 215.93 | 132.44 |
| 50000 | 0.82 | 0.9500 | 0.0500 | 45125 | 3895  | 125 | 17.63 | 0.9486 | 0.9514 | 0.0486 | 0.0514 | 44997 | 4871 | 132 | 45253 | 4628 | 118 | 196.42 | 116.91 |
| 50000 | 0.83 | 0.9500 | 0.0500 | 45125 | 3943  | 125 | 15.54 | 0.9486 | 0.9514 | 0.0486 | 0.0514 | 44997 | 4871 | 132 | 45253 | 4628 | 118 | 177.85 | 102.34 |
| 50000 | 0.84 | 0.9500 | 0.0500 | 45125 | 3990  | 125 | 13.61 | 0.9486 | 0.9514 | 0.0486 | 0.0514 | 44997 | 4871 | 132 | 45253 | 4628 | 118 | 160.19 | 88.75  |
| 50000 | 0.85 | 0.9500 | 0.0500 | 45125 | 4038  | 125 | 11.82 | 0.9486 | 0.9514 | 0.0486 | 0.0514 | 44997 | 4871 | 132 | 45253 | 4628 | 118 | 143.47 | 76.14  |
| 50000 | 0.86 | 0.9500 | 0.0500 | 45125 | 4085  | 125 | 10.18 | 0.9486 | 0.9514 | 0.0486 | 0.0514 | 44997 | 4871 | 132 | 45253 | 4628 | 118 | 127.67 | 64.50  |
| 50000 | 0.87 | 0.9500 | 0.0500 | 45125 | 4133  | 125 | 8.68  | 0.9486 | 0.9514 | 0.0486 | 0.0514 | 44997 | 4871 | 132 | 45253 | 4628 | 118 | 112.80 | 53.84  |
| 50000 | 0.88 | 0.9500 | 0.0500 | 45125 | 4180  | 125 | 7.32  | 0.9486 | 0.9514 | 0.0486 | 0.0514 | 44997 | 4871 | 132 | 45253 | 4628 | 118 | 98.85  | 44.15  |
| 50000 | 0.89 | 0.9500 | 0.0500 | 45125 | 4228  | 125 | 6.08  | 0.9486 | 0.9514 | 0.0486 | 0.0514 | 44997 | 4871 | 132 | 45253 | 4628 | 118 | 85.83  | 35.44  |
| 50000 | 0.90 | 0.9500 | 0.0500 | 45125 | 4275  | 125 | 4.97  | 0.9486 | 0.9514 | 0.0486 | 0.0514 | 44997 | 4871 | 132 | 45253 | 4628 | 118 | 73.74  | 27.70  |
| 50000 | 0.91 | 0.9500 | 0.0500 | 45125 | 4323  | 125 | 3.99  | 0.9486 | 0.9514 | 0.0486 | 0.0514 | 44997 | 4871 | 132 | 45253 | 4628 | 118 | 62.57  | 20.94  |
| 50000 | 0.92 | 0.9500 | 0.0500 | 45125 | 4370  | 125 | 3.12  | 0.9486 | 0.9514 | 0.0486 | 0.0514 | 44997 | 4871 | 132 | 45253 | 4628 | 118 | 52.33  | 15.15  |
| 50000 | 0.93 | 0.9500 | 0.0500 | 45125 | 4418  | 125 | 2.36  | 0.9486 | 0.9514 | 0.0486 | 0.0514 | 44997 | 4871 | 132 | 45253 | 4628 | 118 | 43.01  | 10.34  |

|       |      |        |        |       |      |     |       |        |        |        |        |       |      |     |       |      |     |        |        |
|-------|------|--------|--------|-------|------|-----|-------|--------|--------|--------|--------|-------|------|-----|-------|------|-----|--------|--------|
| 50000 | 0.94 | 0.9500 | 0.0500 | 45125 | 4465 | 125 | 1.72  | 0.9486 | 0.9514 | 0.0486 | 0.0514 | 44997 | 4871 | 132 | 45253 | 4628 | 118 | 34.62  | 6.50   |
| 50000 | 0.95 | 0.9500 | 0.0500 | 45125 | 4513 | 125 | 1.18  | 0.9486 | 0.9514 | 0.0486 | 0.0514 | 44997 | 4871 | 132 | 45253 | 4628 | 118 | 27.16  | 3.63   |
| 50000 | 0.96 | 0.9500 | 0.0500 | 45125 | 4560 | 125 | 0.75  | 0.9486 | 0.9514 | 0.0486 | 0.0514 | 44997 | 4871 | 132 | 45253 | 4628 | 118 | 20.63  | 1.75   |
| 50000 | 0.97 | 0.9500 | 0.0500 | 45125 | 4608 | 125 | 0.42  | 0.9486 | 0.9514 | 0.0486 | 0.0514 | 44997 | 4871 | 132 | 45253 | 4628 | 118 | 15.02  | .83    |
| 50000 | 0.98 | 0.9500 | 0.0500 | 45125 | 4655 | 125 | 0.18  | 0.9486 | 0.9514 | 0.0486 | 0.0514 | 44997 | 4871 | 132 | 45253 | 4628 | 118 | 10.33  | .89    |
| 50000 | 0.99 | 0.9500 | 0.0500 | 45125 | 4703 | 125 | 0.05  | 0.9486 | 0.9514 | 0.0486 | 0.0514 | 44997 | 4871 | 132 | 45253 | 4628 | 118 | 6.58   | 1.93   |
| 50000 | 1.00 | 0.9500 | 0.0500 | 45125 | 4750 | 125 | 0.00  | 0.9486 | 0.9514 | 0.0486 | 0.0514 | 44997 | 4871 | 132 | 45253 | 4628 | 118 | 3.75   | 3.94   |
| 50000 | 1.01 | 0.9500 | 0.0500 | 45125 | 4798 | 125 | 0.04  | 0.9486 | 0.9514 | 0.0486 | 0.0514 | 44997 | 4871 | 132 | 45253 | 4628 | 118 | 1.84   | 6.93   |
| 50000 | 1.02 | 0.9500 | 0.0500 | 45125 | 4845 | 125 | 0.18  | 0.9486 | 0.9514 | 0.0486 | 0.0514 | 44997 | 4871 | 132 | 45253 | 4628 | 118 | .86    | 10.89  |
| 50000 | 1.03 | 0.9500 | 0.0500 | 45125 | 4893 | 125 | 0.40  | 0.9486 | 0.9514 | 0.0486 | 0.0514 | 44997 | 4871 | 132 | 45253 | 4628 | 118 | .81    | 15.83  |
| 50000 | 1.04 | 0.9500 | 0.0500 | 45125 | 4940 | 125 | 0.70  | 0.9486 | 0.9514 | 0.0486 | 0.0514 | 44997 | 4871 | 132 | 45253 | 4628 | 118 | 1.69   | 21.74  |
| 50000 | 1.05 | 0.9500 | 0.0500 | 45125 | 4988 | 125 | 1.08  | 0.9486 | 0.9514 | 0.0486 | 0.0514 | 44997 | 4871 | 132 | 45253 | 4628 | 118 | 3.49   | 28.63  |
| 50000 | 1.06 | 0.9500 | 0.0500 | 45125 | 5035 | 125 | 1.54  | 0.9486 | 0.9514 | 0.0486 | 0.0514 | 44997 | 4871 | 132 | 45253 | 4628 | 118 | 6.22   | 36.49  |
| 50000 | 1.07 | 0.9500 | 0.0500 | 45125 | 5083 | 125 | 2.08  | 0.9486 | 0.9514 | 0.0486 | 0.0514 | 44997 | 4871 | 132 | 45253 | 4628 | 118 | 9.87   | 45.32  |
| 50000 | 1.08 | 0.9500 | 0.0500 | 45125 | 5130 | 125 | 2.70  | 0.9486 | 0.9514 | 0.0486 | 0.0514 | 44997 | 4871 | 132 | 45253 | 4628 | 118 | 14.45  | 55.14  |
| 50000 | 1.09 | 0.9500 | 0.0500 | 45125 | 5178 | 125 | 3.39  | 0.9486 | 0.9514 | 0.0486 | 0.0514 | 44997 | 4871 | 132 | 45253 | 4628 | 118 | 19.96  | 65.92  |
| 50000 | 1.10 | 0.9500 | 0.0500 | 45125 | 5225 | 125 | 4.15  | 0.9486 | 0.9514 | 0.0486 | 0.0514 | 44997 | 4871 | 132 | 45253 | 4628 | 118 | 26.39  | 77.68  |
| 50000 | 1.11 | 0.9500 | 0.0500 | 45125 | 5273 | 125 | 4.98  | 0.9486 | 0.9514 | 0.0486 | 0.0514 | 44997 | 4871 | 132 | 45253 | 4628 | 118 | 33.75  | 90.42  |
| 50000 | 1.12 | 0.9500 | 0.0500 | 45125 | 5320 | 125 | 5.88  | 0.9486 | 0.9514 | 0.0486 | 0.0514 | 44997 | 4871 | 132 | 45253 | 4628 | 118 | 42.03  | 104.13 |
| 50000 | 1.13 | 0.9500 | 0.0500 | 45125 | 5368 | 125 | 6.85  | 0.9486 | 0.9514 | 0.0486 | 0.0514 | 44997 | 4871 | 132 | 45253 | 4628 | 118 | 51.24  | 118.82 |
| 50000 | 1.14 | 0.9500 | 0.0500 | 45125 | 5415 | 125 | 7.88  | 0.9486 | 0.9514 | 0.0486 | 0.0514 | 44997 | 4871 | 132 | 45253 | 4628 | 118 | 61.38  | 134.48 |
| 50000 | 1.15 | 0.9500 | 0.0500 | 45125 | 5463 | 125 | 8.98  | 0.9486 | 0.9514 | 0.0486 | 0.0514 | 44997 | 4871 | 132 | 45253 | 4628 | 118 | 72.45  | 151.12 |
| 50000 | 1.16 | 0.9500 | 0.0500 | 45125 | 5510 | 125 | 10.14 | 0.9486 | 0.9514 | 0.0486 | 0.0514 | 44997 | 4871 | 132 | 45253 | 4628 | 118 | 84.44  | 168.73 |
| 50000 | 1.17 | 0.9500 | 0.0500 | 45125 | 5558 | 125 | 11.37 | 0.9486 | 0.9514 | 0.0486 | 0.0514 | 44997 | 4871 | 132 | 45253 | 4628 | 118 | 97.36  | 187.32 |
| 50000 | 1.18 | 0.9500 | 0.0500 | 45125 | 5605 | 125 | 12.66 | 0.9486 | 0.9514 | 0.0486 | 0.0514 | 44997 | 4871 | 132 | 45253 | 4628 | 118 | 111.20 | 206.88 |
| 50000 | 1.19 | 0.9500 | 0.0500 | 45125 | 5653 | 125 | 14.00 | 0.9486 | 0.9514 | 0.0486 | 0.0514 | 44997 | 4871 | 132 | 45253 | 4628 | 118 | 125.97 | 227.41 |
| 50000 | 1.20 | 0.9500 | 0.0500 | 45125 | 5700 | 125 | 15.41 | 0.9486 | 0.9514 | 0.0486 | 0.0514 | 44997 | 4871 | 132 | 45253 | 4628 | 118 | 141.66 | 248.93 |
| 50000 | 0.80 | 1.0000 | 0.0000 | 50000 | 0    | 0   | 15.41 | 1.0000 | 1.0000 | 0.0000 | 0.0000 | 50000 | 0    | 0   | 50000 | 0    | 0   | .      | .      |
| 50000 | 0.81 | 1.0000 | 0.0000 | 50000 | 0    | 0   | 15.41 | 1.0000 | 1.0000 | 0.0000 | 0.0000 | 50000 | 0    | 0   | 50000 | 0    | 0   | .      | .      |
| 50000 | 0.82 | 1.0000 | 0.0000 | 50000 | 0    | 0   | 15.41 | 1.0000 | 1.0000 | 0.0000 | 0.0000 | 50000 | 0    | 0   | 50000 | 0    | 0   | .      | .      |
| 50000 | 0.83 | 1.0000 | 0.0000 | 50000 | 0    | 0   | 15.41 | 1.0000 | 1.0000 | 0.0000 | 0.0000 | 50000 | 0    | 0   | 50000 | 0    | 0   | .      | .      |
| 50000 | 0.84 | 1.0000 | 0.0000 | 50000 | 0    | 0   | 15.41 | 1.0000 | 1.0000 | 0.0000 | 0.0000 | 50000 | 0    | 0   | 50000 | 0    | 0   | .      | .      |
| 50000 | 0.85 | 1.0000 | 0.0000 | 50000 | 0    | 0   | 15.41 | 1.0000 | 1.0000 | 0.0000 | 0.0000 | 50000 | 0    | 0   | 50000 | 0    | 0   | .      | .      |
| 50000 | 0.86 | 1.0000 | 0.0000 | 50000 | 0    | 0   | 15.41 | 1.0000 | 1.0000 | 0.0000 | 0.0000 | 50000 | 0    | 0   | 50000 | 0    | 0   | .      | .      |
| 50000 | 0.87 | 1.0000 | 0.0000 | 50000 | 0    | 0   | 15.41 | 1.0000 | 1.0000 | 0.0000 | 0.0000 | 50000 | 0    | 0   | 50000 | 0    | 0   | .      | .      |



|        |      |        |        |     |       |       |       |        |        |        |        |     |      |       |     |      |       |        |        |
|--------|------|--------|--------|-----|-------|-------|-------|--------|--------|--------|--------|-----|------|-------|-----|------|-------|--------|--------|
| 100000 | 0.82 | 0.0500 | 0.9500 | 250 | 7790  | 90250 | 35.26 | 0.0490 | 0.0510 | 0.9490 | 0.9510 | 241 | 9328 | 90432 | 260 | 9672 | 90069 | 254.29 | 366.84 |
| 100000 | 0.83 | 0.0500 | 0.9500 | 250 | 7885  | 90250 | 31.08 | 0.0490 | 0.0510 | 0.9490 | 0.9510 | 241 | 9328 | 90432 | 260 | 9672 | 90069 | 223.93 | 330.81 |
| 100000 | 0.84 | 0.0500 | 0.9500 | 250 | 7980  | 90250 | 27.21 | 0.0490 | 0.0510 | 0.9490 | 0.9510 | 241 | 9328 | 90432 | 260 | 9672 | 90069 | 195.51 | 296.64 |
| 100000 | 0.85 | 0.0500 | 0.9500 | 250 | 8075  | 90250 | 23.65 | 0.0490 | 0.0510 | 0.9490 | 0.9510 | 241 | 9328 | 90432 | 260 | 9672 | 90069 | 169.02 | 264.34 |
| 100000 | 0.86 | 0.0500 | 0.9500 | 250 | 8170  | 90250 | 20.37 | 0.0490 | 0.0510 | 0.9490 | 0.9510 | 241 | 9328 | 90432 | 260 | 9672 | 90069 | 144.47 | 233.90 |
| 100000 | 0.87 | 0.0500 | 0.9500 | 250 | 8265  | 90250 | 17.37 | 0.0490 | 0.0510 | 0.9490 | 0.9510 | 241 | 9328 | 90432 | 260 | 9672 | 90069 | 121.85 | 205.33 |
| 100000 | 0.88 | 0.0500 | 0.9500 | 250 | 8360  | 90250 | 14.64 | 0.0490 | 0.0510 | 0.9490 | 0.9510 | 241 | 9328 | 90432 | 260 | 9672 | 90069 | 101.17 | 178.63 |
| 100000 | 0.89 | 0.0500 | 0.9500 | 250 | 8455  | 90250 | 12.17 | 0.0490 | 0.0510 | 0.9490 | 0.9510 | 241 | 9328 | 90432 | 260 | 9672 | 90069 | 82.42  | 153.80 |
| 100000 | 0.90 | 0.0500 | 0.9500 | 250 | 8550  | 90250 | 9.95  | 0.0490 | 0.0510 | 0.9490 | 0.9510 | 241 | 9328 | 90432 | 260 | 9672 | 90069 | 65.61  | 130.83 |
| 100000 | 0.91 | 0.0500 | 0.9500 | 250 | 8645  | 90250 | 7.98  | 0.0490 | 0.0510 | 0.9490 | 0.9510 | 241 | 9328 | 90432 | 260 | 9672 | 90069 | 50.73  | 109.72 |
| 100000 | 0.92 | 0.0500 | 0.9500 | 250 | 8740  | 90250 | 6.24  | 0.0490 | 0.0510 | 0.9490 | 0.9510 | 241 | 9328 | 90432 | 260 | 9672 | 90069 | 37.79  | 90.49  |
| 100000 | 0.93 | 0.0500 | 0.9500 | 250 | 8835  | 90250 | 4.73  | 0.0490 | 0.0510 | 0.9490 | 0.9510 | 241 | 9328 | 90432 | 260 | 9672 | 90069 | 26.78  | 73.11  |
| 100000 | 0.94 | 0.0500 | 0.9500 | 250 | 8930  | 90250 | 3.44  | 0.0490 | 0.0510 | 0.9490 | 0.9510 | 241 | 9328 | 90432 | 260 | 9672 | 90069 | 17.71  | 57.61  |
| 100000 | 0.95 | 0.0500 | 0.9500 | 250 | 9025  | 90250 | 2.36  | 0.0490 | 0.0510 | 0.9490 | 0.9510 | 241 | 9328 | 90432 | 260 | 9672 | 90069 | 10.57  | 43.97  |
| 100000 | 0.96 | 0.0500 | 0.9500 | 250 | 9120  | 90250 | 1.50  | 0.0490 | 0.0510 | 0.9490 | 0.9510 | 241 | 9328 | 90432 | 260 | 9672 | 90069 | 5.37   | 32.20  |
| 100000 | 0.97 | 0.0500 | 0.9500 | 250 | 9215  | 90250 | 0.84  | 0.0490 | 0.0510 | 0.9490 | 0.9510 | 241 | 9328 | 90432 | 260 | 9672 | 90069 | 2.10   | 22.29  |
| 100000 | 0.98 | 0.0500 | 0.9500 | 250 | 9310  | 90250 | 0.37  | 0.0490 | 0.0510 | 0.9490 | 0.9510 | 241 | 9328 | 90432 | 260 | 9672 | 90069 | .77    | 14.25  |
| 100000 | 0.99 | 0.0500 | 0.9500 | 250 | 9405  | 90250 | 0.09  | 0.0490 | 0.0510 | 0.9490 | 0.9510 | 241 | 9328 | 90432 | 260 | 9672 | 90069 | 1.37   | 8.08   |
| 100000 | 1.00 | 0.0500 | 0.9500 | 250 | 9500  | 90250 | 0.00  | 0.0490 | 0.0510 | 0.9490 | 0.9510 | 241 | 9328 | 90432 | 260 | 9672 | 90069 | 3.91   | 3.77   |
| 100000 | 1.01 | 0.0500 | 0.9500 | 250 | 9595  | 90250 | 0.09  | 0.0490 | 0.0510 | 0.9490 | 0.9510 | 241 | 9328 | 90432 | 260 | 9672 | 90069 | 8.39   | 1.33   |
| 100000 | 1.02 | 0.0500 | 0.9500 | 250 | 9690  | 90250 | 0.35  | 0.0490 | 0.0510 | 0.9490 | 0.9510 | 241 | 9328 | 90432 | 260 | 9672 | 90069 | 14.79  | .76    |
| 100000 | 1.03 | 0.0500 | 0.9500 | 250 | 9785  | 90250 | 0.79  | 0.0490 | 0.0510 | 0.9490 | 0.9510 | 241 | 9328 | 90432 | 260 | 9672 | 90069 | 23.14  | 2.05   |
| 100000 | 1.04 | 0.0500 | 0.9500 | 250 | 9880  | 90250 | 1.39  | 0.0490 | 0.0510 | 0.9490 | 0.9510 | 241 | 9328 | 90432 | 260 | 9672 | 90069 | 33.42  | 5.21   |
| 100000 | 1.05 | 0.0500 | 0.9500 | 250 | 9975  | 90250 | 2.16  | 0.0490 | 0.0510 | 0.9490 | 0.9510 | 241 | 9328 | 90432 | 260 | 9672 | 90069 | 45.63  | 10.23  |
| 100000 | 1.06 | 0.0500 | 0.9500 | 250 | 10070 | 90250 | 3.08  | 0.0490 | 0.0510 | 0.9490 | 0.9510 | 241 | 9328 | 90432 | 260 | 9672 | 90069 | 59.78  | 17.12  |
| 100000 | 1.07 | 0.0500 | 0.9500 | 250 | 10165 | 90250 | 4.16  | 0.0490 | 0.0510 | 0.9490 | 0.9510 | 241 | 9328 | 90432 | 260 | 9672 | 90069 | 75.86  | 25.88  |
| 100000 | 1.08 | 0.0500 | 0.9500 | 250 | 10260 | 90250 | 5.39  | 0.0490 | 0.0510 | 0.9490 | 0.9510 | 241 | 9328 | 90432 | 260 | 9672 | 90069 | 93.88  | 36.50  |
| 100000 | 1.09 | 0.0500 | 0.9500 | 250 | 10355 | 90250 | 6.77  | 0.0490 | 0.0510 | 0.9490 | 0.9510 | 241 | 9328 | 90432 | 260 | 9672 | 90069 | 113.83 | 48.99  |
| 100000 | 1.10 | 0.0500 | 0.9500 | 250 | 10450 | 90250 | 8.29  | 0.0490 | 0.0510 | 0.9490 | 0.9510 | 241 | 9328 | 90432 | 260 | 9672 | 90069 | 135.72 | 63.35  |
| 100000 | 1.11 | 0.0500 | 0.9500 | 250 | 10545 | 90250 | 9.96  | 0.0490 | 0.0510 | 0.9490 | 0.9510 | 241 | 9328 | 90432 | 260 | 9672 | 90069 | 159.55 | 79.57  |
| 100000 | 1.12 | 0.0500 | 0.9500 | 250 | 10640 | 90250 | 11.76 | 0.0490 | 0.0510 | 0.9490 | 0.9510 | 241 | 9328 | 90432 | 260 | 9672 | 90069 | 185.31 | 97.66  |
| 100000 | 1.13 | 0.0500 | 0.9500 | 250 | 10735 | 90250 | 13.70 | 0.0490 | 0.0510 | 0.9490 | 0.9510 | 241 | 9328 | 90432 | 260 | 9672 | 90069 | 213.00 | 117.61 |
| 100000 | 1.14 | 0.0500 | 0.9500 | 250 | 10830 | 90250 | 15.76 | 0.0490 | 0.0510 | 0.9490 | 0.9510 | 241 | 9328 | 90432 | 260 | 9672 | 90069 | 242.63 | 139.43 |
| 100000 | 1.15 | 0.0500 | 0.9500 | 250 | 10925 | 90250 | 17.96 | 0.0490 | 0.0510 | 0.9490 | 0.9510 | 241 | 9328 | 90432 | 260 | 9672 | 90069 | 274.19 | 163.12 |
| 100000 | 1.16 | 0.0500 | 0.9500 | 250 | 11020 | 90250 | 20.29 | 0.0490 | 0.0510 | 0.9490 | 0.9510 | 241 | 9328 | 90432 | 260 | 9672 | 90069 | 307.69 | 188.67 |

|        |      |        |        |      |       |       |        |        |        |        |        |     |       |       |      |       |       |        |        |
|--------|------|--------|--------|------|-------|-------|--------|--------|--------|--------|--------|-----|-------|-------|------|-------|-------|--------|--------|
| 100000 | 1.17 | 0.0500 | 0.9500 | 250  | 11115 | 90250 | 22.74  | 0.0490 | 0.0510 | 0.9490 | 0.9510 | 241 | 9328  | 90432 | 260  | 9672  | 90069 | 343.13 | 216.09 |
| 100000 | 1.18 | 0.0500 | 0.9500 | 250  | 11210 | 90250 | 25.31  | 0.0490 | 0.0510 | 0.9490 | 0.9510 | 241 | 9328  | 90432 | 260  | 9672  | 90069 | 380.50 | 245.38 |
| 100000 | 1.19 | 0.0500 | 0.9500 | 250  | 11305 | 90250 | 28.00  | 0.0490 | 0.0510 | 0.9490 | 0.9510 | 241 | 9328  | 90432 | 260  | 9672  | 90069 | 419.80 | 276.53 |
| 100000 | 1.20 | 0.0500 | 0.9500 | 250  | 11400 | 90250 | 30.81  | 0.0490 | 0.0510 | 0.9490 | 0.9510 | 241 | 9328  | 90432 | 260  | 9672  | 90069 | 461.04 | 309.54 |
| 100000 | 0.80 | 0.1000 | 0.9000 | 1000 | 14400 | 81000 | 156.71 | 0.0987 | 0.1013 | 0.8987 | 0.9013 | 974 | 17789 | 81237 | 1026 | 18210 | 80764 | 647.13 | 798.53 |
| 100000 | 0.81 | 0.1000 | 0.9000 | 1000 | 14580 | 81000 | 139.89 | 0.0987 | 0.1013 | 0.8987 | 0.9013 | 974 | 17789 | 81237 | 1026 | 18210 | 80764 | 580.36 | 724.99 |
| 100000 | 0.82 | 0.1000 | 0.9000 | 1000 | 14760 | 81000 | 124.21 | 0.0987 | 0.1013 | 0.8987 | 0.9013 | 974 | 17789 | 81237 | 1026 | 18210 | 80764 | 517.24 | 655.01 |
| 100000 | 0.83 | 0.1000 | 0.9000 | 1000 | 14940 | 81000 | 109.63 | 0.0987 | 0.1013 | 0.8987 | 0.9013 | 974 | 17789 | 81237 | 1026 | 18210 | 80764 | 457.76 | 588.58 |
| 100000 | 0.84 | 0.1000 | 0.9000 | 1000 | 15120 | 81000 | 96.10  | 0.0987 | 0.1013 | 0.8987 | 0.9013 | 974 | 17789 | 81237 | 1026 | 18210 | 80764 | 401.92 | 525.72 |
| 100000 | 0.85 | 0.1000 | 0.9000 | 1000 | 15300 | 81000 | 83.60  | 0.0987 | 0.1013 | 0.8987 | 0.9013 | 974 | 17789 | 81237 | 1026 | 18210 | 80764 | 349.72 | 466.41 |
| 100000 | 0.86 | 0.1000 | 0.9000 | 1000 | 15480 | 81000 | 72.10  | 0.0987 | 0.1013 | 0.8987 | 0.9013 | 974 | 17789 | 81237 | 1026 | 18210 | 80764 | 301.17 | 410.66 |
| 100000 | 0.87 | 0.1000 | 0.9000 | 1000 | 15660 | 81000 | 61.55  | 0.0987 | 0.1013 | 0.8987 | 0.9013 | 974 | 17789 | 81237 | 1026 | 18210 | 80764 | 256.26 | 358.47 |
| 100000 | 0.88 | 0.1000 | 0.9000 | 1000 | 15840 | 81000 | 51.93  | 0.0987 | 0.1013 | 0.8987 | 0.9013 | 974 | 17789 | 81237 | 1026 | 18210 | 80764 | 214.99 | 309.83 |
| 100000 | 0.89 | 0.1000 | 0.9000 | 1000 | 16020 | 81000 | 43.22  | 0.0987 | 0.1013 | 0.8987 | 0.9013 | 974 | 17789 | 81237 | 1026 | 18210 | 80764 | 177.36 | 264.76 |
| 100000 | 0.90 | 0.1000 | 0.9000 | 1000 | 16200 | 81000 | 35.38  | 0.0987 | 0.1013 | 0.8987 | 0.9013 | 974 | 17789 | 81237 | 1026 | 18210 | 80764 | 143.38 | 223.24 |
| 100000 | 0.91 | 0.1000 | 0.9000 | 1000 | 16380 | 81000 | 28.39  | 0.0987 | 0.1013 | 0.8987 | 0.9013 | 974 | 17789 | 81237 | 1026 | 18210 | 80764 | 113.04 | 185.28 |
| 100000 | 0.92 | 0.1000 | 0.9000 | 1000 | 16560 | 81000 | 22.23  | 0.0987 | 0.1013 | 0.8987 | 0.9013 | 974 | 17789 | 81237 | 1026 | 18210 | 80764 | 86.34  | 150.88 |
| 100000 | 0.93 | 0.1000 | 0.9000 | 1000 | 16740 | 81000 | 16.86  | 0.0987 | 0.1013 | 0.8987 | 0.9013 | 974 | 17789 | 81237 | 1026 | 18210 | 80764 | 63.28  | 120.04 |
| 100000 | 0.94 | 0.1000 | 0.9000 | 1000 | 16920 | 81000 | 12.28  | 0.0987 | 0.1013 | 0.8987 | 0.9013 | 974 | 17789 | 81237 | 1026 | 18210 | 80764 | 43.87  | 92.76  |
| 100000 | 0.95 | 0.1000 | 0.9000 | 1000 | 17100 | 81000 | 8.45   | 0.0987 | 0.1013 | 0.8987 | 0.9013 | 974 | 17789 | 81237 | 1026 | 18210 | 80764 | 28.10  | 69.04  |
| 100000 | 0.96 | 0.1000 | 0.9000 | 1000 | 17280 | 81000 | 5.36   | 0.0987 | 0.1013 | 0.8987 | 0.9013 | 974 | 17789 | 81237 | 1026 | 18210 | 80764 | 15.97  | 48.87  |
| 100000 | 0.97 | 0.1000 | 0.9000 | 1000 | 17460 | 81000 | 2.99   | 0.0987 | 0.1013 | 0.8987 | 0.9013 | 974 | 17789 | 81237 | 1026 | 18210 | 80764 | 7.49   | 32.27  |
| 100000 | 0.98 | 0.1000 | 0.9000 | 1000 | 17640 | 81000 | 1.32   | 0.0987 | 0.1013 | 0.8987 | 0.9013 | 974 | 17789 | 81237 | 1026 | 18210 | 80764 | 2.64   | 19.22  |
| 100000 | 0.99 | 0.1000 | 0.9000 | 1000 | 17820 | 81000 | 0.33   | 0.0987 | 0.1013 | 0.8987 | 0.9013 | 974 | 17789 | 81237 | 1026 | 18210 | 80764 | 1.44   | 9.73   |
| 100000 | 1.00 | 0.1000 | 0.9000 | 1000 | 18000 | 81000 | 0.00   | 0.0987 | 0.1013 | 0.8987 | 0.9013 | 974 | 17789 | 81237 | 1026 | 18210 | 80764 | 3.89   | 3.80   |
| 100000 | 1.01 | 0.1000 | 0.9000 | 1000 | 18180 | 81000 | 0.32   | 0.0987 | 0.1013 | 0.8987 | 0.9013 | 974 | 17789 | 81237 | 1026 | 18210 | 80764 | 9.97   | 1.42   |
| 100000 | 1.02 | 0.1000 | 0.9000 | 1000 | 18360 | 81000 | 1.28   | 0.0987 | 0.1013 | 0.8987 | 0.9013 | 974 | 17789 | 81237 | 1026 | 18210 | 80764 | 19.70  | 2.61   |
| 100000 | 1.03 | 0.1000 | 0.9000 | 1000 | 18540 | 81000 | 2.85   | 0.0987 | 0.1013 | 0.8987 | 0.9013 | 974 | 17789 | 81237 | 1026 | 18210 | 80764 | 33.07  | 7.35   |
| 100000 | 1.04 | 0.1000 | 0.9000 | 1000 | 18720 | 81000 | 5.02   | 0.0987 | 0.1013 | 0.8987 | 0.9013 | 974 | 17789 | 81237 | 1026 | 18210 | 80764 | 50.09  | 15.66  |
| 100000 | 1.05 | 0.1000 | 0.9000 | 1000 | 18900 | 81000 | 7.79   | 0.0987 | 0.1013 | 0.8987 | 0.9013 | 974 | 17789 | 81237 | 1026 | 18210 | 80764 | 70.74  | 27.52  |
| 100000 | 1.06 | 0.1000 | 0.9000 | 1000 | 19080 | 81000 | 11.13  | 0.0987 | 0.1013 | 0.8987 | 0.9013 | 974 | 17789 | 81237 | 1026 | 18210 | 80764 | 95.04  | 42.94  |
| 100000 | 1.07 | 0.1000 | 0.9000 | 1000 | 19260 | 81000 | 15.03  | 0.0987 | 0.1013 | 0.8987 | 0.9013 | 974 | 17789 | 81237 | 1026 | 18210 | 80764 | 122.98 | 61.92  |
| 100000 | 1.08 | 0.1000 | 0.9000 | 1000 | 19440 | 81000 | 19.48  | 0.0987 | 0.1013 | 0.8987 | 0.9013 | 974 | 17789 | 81237 | 1026 | 18210 | 80764 | 154.57 | 84.45  |
| 100000 | 1.09 | 0.1000 | 0.9000 | 1000 | 19620 | 81000 | 24.48  | 0.0987 | 0.1013 | 0.8987 | 0.9013 | 974 | 17789 | 81237 | 1026 | 18210 | 80764 | 189.79 | 110.55 |
| 100000 | 1.10 | 0.1000 | 0.9000 | 1000 | 19800 | 81000 | 30.00  | 0.0987 | 0.1013 | 0.8987 | 0.9013 | 974 | 17789 | 81237 | 1026 | 18210 | 80764 | 228.66 | 140.20 |



|        |      |        |        |      |       |       |        |        |        |        |        |      |       |       |      |       |       |        |         |
|--------|------|--------|--------|------|-------|-------|--------|--------|--------|--------|--------|------|-------|-------|------|-------|-------|--------|---------|
| 100000 | 1.11 | 0.1000 | 0.9000 | 1000 | 19980 | 81000 | 36.05  | 0.0987 | 0.1013 | 0.8987 | 0.9013 | 974  | 17789 | 81237 | 1026 | 18210 | 80764 | 271.17 | 173.41  |
| 100000 | 1.12 | 0.1000 | 0.9000 | 1000 | 20160 | 81000 | 42.60  | 0.0987 | 0.1013 | 0.8987 | 0.9013 | 974  | 17789 | 81237 | 1026 | 18210 | 80764 | 317.33 | 210.18  |
| 100000 | 1.13 | 0.1000 | 0.9000 | 1000 | 20340 | 81000 | 49.64  | 0.0987 | 0.1013 | 0.8987 | 0.9013 | 974  | 17789 | 81237 | 1026 | 18210 | 80764 | 367.13 | 250.51  |
| 100000 | 1.14 | 0.1000 | 0.9000 | 1000 | 20520 | 81000 | 57.18  | 0.0987 | 0.1013 | 0.8987 | 0.9013 | 974  | 17789 | 81237 | 1026 | 18210 | 80764 | 420.57 | 294.40  |
| 100000 | 1.15 | 0.1000 | 0.9000 | 1000 | 20700 | 81000 | 65.19  | 0.0987 | 0.1013 | 0.8987 | 0.9013 | 974  | 17789 | 81237 | 1026 | 18210 | 80764 | 477.65 | 341.85  |
| 100000 | 1.16 | 0.1000 | 0.9000 | 1000 | 20880 | 81000 | 73.68  | 0.0987 | 0.1013 | 0.8987 | 0.9013 | 974  | 17789 | 81237 | 1026 | 18210 | 80764 | 538.37 | 392.85  |
| 100000 | 1.17 | 0.1000 | 0.9000 | 1000 | 21060 | 81000 | 82.62  | 0.0987 | 0.1013 | 0.8987 | 0.9013 | 974  | 17789 | 81237 | 1026 | 18210 | 80764 | 602.74 | 447.41  |
| 100000 | 1.18 | 0.1000 | 0.9000 | 1000 | 21240 | 81000 | 92.02  | 0.0987 | 0.1013 | 0.8987 | 0.9013 | 974  | 17789 | 81237 | 1026 | 18210 | 80764 | 670.75 | 505.53  |
| 100000 | 1.19 | 0.1000 | 0.9000 | 1000 | 21420 | 81000 | 101.86 | 0.0987 | 0.1013 | 0.8987 | 0.9013 | 974  | 17789 | 81237 | 1026 | 18210 | 80764 | 742.40 | 567.21  |
| 100000 | 1.20 | 0.1000 | 0.9000 | 1000 | 21600 | 81000 | 112.15 | 0.0987 | 0.1013 | 0.8987 | 0.9013 | 974  | 17789 | 81237 | 1026 | 18210 | 80764 | 817.70 | 632.45  |
| 100000 | 0.80 | 0.1500 | 0.8500 | 2250 | 20400 | 72250 | 308.46 | 0.1484 | 0.1516 | 0.8484 | 0.8516 | 2203 | 25280 | 72516 | 2297 | 25719 | 71984 | 944.14 | 1101.84 |
| 100000 | 0.81 | 0.1500 | 0.8500 | 2250 | 20655 | 72250 | 275.69 | 0.1484 | 0.1516 | 0.8484 | 0.8516 | 2203 | 25280 | 72516 | 2297 | 25719 | 71984 | 848.26 | 998.90  |
| 100000 | 0.82 | 0.1500 | 0.8500 | 2250 | 20910 | 72250 | 245.08 | 0.1484 | 0.1516 | 0.8484 | 0.8516 | 2203 | 25280 | 72516 | 2297 | 25719 | 71984 | 757.52 | 901.01  |
| 100000 | 0.83 | 0.1500 | 0.8500 | 2250 | 21165 | 72250 | 216.56 | 0.1484 | 0.1516 | 0.8484 | 0.8516 | 2203 | 25280 | 72516 | 2297 | 25719 | 71984 | 671.92 | 808.19  |
| 100000 | 0.84 | 0.1500 | 0.8500 | 2250 | 21420 | 72250 | 190.05 | 0.1484 | 0.1516 | 0.8484 | 0.8516 | 2203 | 25280 | 72516 | 2297 | 25719 | 71984 | 591.47 | 720.42  |
| 100000 | 0.85 | 0.1500 | 0.8500 | 2250 | 21675 | 72250 | 165.52 | 0.1484 | 0.1516 | 0.8484 | 0.8516 | 2203 | 25280 | 72516 | 2297 | 25719 | 71984 | 516.16 | 637.71  |
| 100000 | 0.86 | 0.1500 | 0.8500 | 2250 | 21930 | 72250 | 142.89 | 0.1484 | 0.1516 | 0.8484 | 0.8516 | 2203 | 25280 | 72516 | 2297 | 25719 | 71984 | 446.00 | 560.05  |
| 100000 | 0.87 | 0.1500 | 0.8500 | 2250 | 22185 | 72250 | 122.11 | 0.1484 | 0.1516 | 0.8484 | 0.8516 | 2203 | 25280 | 72516 | 2297 | 25719 | 71984 | 380.98 | 487.45  |
| 100000 | 0.88 | 0.1500 | 0.8500 | 2250 | 22440 | 72250 | 103.14 | 0.1484 | 0.1516 | 0.8484 | 0.8516 | 2203 | 25280 | 72516 | 2297 | 25719 | 71984 | 321.11 | 419.91  |
| 100000 | 0.89 | 0.1500 | 0.8500 | 2250 | 22695 | 72250 | 85.92  | 0.1484 | 0.1516 | 0.8484 | 0.8516 | 2203 | 25280 | 72516 | 2297 | 25719 | 71984 | 266.38 | 357.42  |
| 100000 | 0.90 | 0.1500 | 0.8500 | 2250 | 22950 | 72250 | 70.40  | 0.1484 | 0.1516 | 0.8484 | 0.8516 | 2203 | 25280 | 72516 | 2297 | 25719 | 71984 | 216.79 | 299.99  |
| 100000 | 0.91 | 0.1500 | 0.8500 | 2250 | 23205 | 72250 | 56.55  | 0.1484 | 0.1516 | 0.8484 | 0.8516 | 2203 | 25280 | 72516 | 2297 | 25719 | 71984 | 172.35 | 247.62  |
| 100000 | 0.92 | 0.1500 | 0.8500 | 2250 | 23460 | 72250 | 44.31  | 0.1484 | 0.1516 | 0.8484 | 0.8516 | 2203 | 25280 | 72516 | 2297 | 25719 | 71984 | 133.05 | 200.30  |
| 100000 | 0.93 | 0.1500 | 0.8500 | 2250 | 23715 | 72250 | 33.65  | 0.1484 | 0.1516 | 0.8484 | 0.8516 | 2203 | 25280 | 72516 | 2297 | 25719 | 71984 | 98.90  | 158.04  |
| 100000 | 0.94 | 0.1500 | 0.8500 | 2250 | 23970 | 72250 | 24.52  | 0.1484 | 0.1516 | 0.8484 | 0.8516 | 2203 | 25280 | 72516 | 2297 | 25719 | 71984 | 69.89  | 120.84  |
| 100000 | 0.95 | 0.1500 | 0.8500 | 2250 | 24225 | 72250 | 16.89  | 0.1484 | 0.1516 | 0.8484 | 0.8516 | 2203 | 25280 | 72516 | 2297 | 25719 | 71984 | 46.03  | 88.69   |
| 100000 | 0.96 | 0.1500 | 0.8500 | 2250 | 24480 | 72250 | 10.73  | 0.1484 | 0.1516 | 0.8484 | 0.8516 | 2203 | 25280 | 72516 | 2297 | 25719 | 71984 | 27.31  | 61.60   |
| 100000 | 0.97 | 0.1500 | 0.8500 | 2250 | 24735 | 72250 | 5.99   | 0.1484 | 0.1516 | 0.8484 | 0.8516 | 2203 | 25280 | 72516 | 2297 | 25719 | 71984 | 13.74  | 39.57   |
| 100000 | 0.98 | 0.1500 | 0.8500 | 2250 | 24990 | 72250 | 2.64   | 0.1484 | 0.1516 | 0.8484 | 0.8516 | 2203 | 25280 | 72516 | 2297 | 25719 | 71984 | 5.30   | 22.59   |
| 100000 | 0.99 | 0.1500 | 0.8500 | 2250 | 25245 | 72250 | 0.66   | 0.1484 | 0.1516 | 0.8484 | 0.8516 | 2203 | 25280 | 72516 | 2297 | 25719 | 71984 | 2.02   | 10.67   |
| 100000 | 1.00 | 0.1500 | 0.8500 | 2250 | 25500 | 72250 | 0.00   | 0.1484 | 0.1516 | 0.8484 | 0.8516 | 2203 | 25280 | 72516 | 2297 | 25719 | 71984 | 3.88   | 3.81    |
| 100000 | 1.01 | 0.1500 | 0.8500 | 2250 | 25755 | 72250 | 0.65   | 0.1484 | 0.1516 | 0.8484 | 0.8516 | 2203 | 25280 | 72516 | 2297 | 25719 | 71984 | 10.88  | 2.00    |
| 100000 | 1.02 | 0.1500 | 0.8500 | 2250 | 26010 | 72250 | 2.56   | 0.1484 | 0.1516 | 0.8484 | 0.8516 | 2203 | 25280 | 72516 | 2297 | 25719 | 71984 | 23.02  | 5.25    |
| 100000 | 1.03 | 0.1500 | 0.8500 | 2250 | 26265 | 72250 | 5.73   | 0.1484 | 0.1516 | 0.8484 | 0.8516 | 2203 | 25280 | 72516 | 2297 | 25719 | 71984 | 40.31  | 13.56   |
| 100000 | 1.04 | 0.1500 | 0.8500 | 2250 | 26520 | 72250 | 10.11  | 0.1484 | 0.1516 | 0.8484 | 0.8516 | 2203 | 25280 | 72516 | 2297 | 25719 | 71984 | 62.75  | 26.92   |

|        |      |        |        |      |       |       |        |        |        |        |        |      |       |       |      |       |       |         |         |
|--------|------|--------|--------|------|-------|-------|--------|--------|--------|--------|--------|------|-------|-------|------|-------|-------|---------|---------|
| 100000 | 1.05 | 0.1500 | 0.8500 | 2250 | 26775 | 72250 | 15.68  | 0.1484 | 0.1516 | 0.8484 | 0.8516 | 2203 | 25280 | 72516 | 2297 | 25719 | 71984 | 90.33   | 45.34   |
| 100000 | 1.06 | 0.1500 | 0.8500 | 2250 | 27030 | 72250 | 22.42  | 0.1484 | 0.1516 | 0.8484 | 0.8516 | 2203 | 25280 | 72516 | 2297 | 25719 | 71984 | 123.05  | 68.82   |
| 100000 | 1.07 | 0.1500 | 0.8500 | 2250 | 27285 | 72250 | 30.31  | 0.1484 | 0.1516 | 0.8484 | 0.8516 | 2203 | 25280 | 72516 | 2297 | 25719 | 71984 | 160.92  | 97.35   |
| 100000 | 1.08 | 0.1500 | 0.8500 | 2250 | 27540 | 72250 | 39.32  | 0.1484 | 0.1516 | 0.8484 | 0.8516 | 2203 | 25280 | 72516 | 2297 | 25719 | 71984 | 203.93  | 130.94  |
| 100000 | 1.09 | 0.1500 | 0.8500 | 2250 | 27795 | 72250 | 49.43  | 0.1484 | 0.1516 | 0.8484 | 0.8516 | 2203 | 25280 | 72516 | 2297 | 25719 | 71984 | 252.09  | 169.59  |
| 100000 | 1.10 | 0.1500 | 0.8500 | 2250 | 28050 | 72250 | 60.62  | 0.1484 | 0.1516 | 0.8484 | 0.8516 | 2203 | 25280 | 72516 | 2297 | 25719 | 71984 | 305.39  | 213.29  |
| 100000 | 1.11 | 0.1500 | 0.8500 | 2250 | 28305 | 72250 | 72.87  | 0.1484 | 0.1516 | 0.8484 | 0.8516 | 2203 | 25280 | 72516 | 2297 | 25719 | 71984 | 363.83  | 262.05  |
| 100000 | 1.12 | 0.1500 | 0.8500 | 2250 | 28560 | 72250 | 86.16  | 0.1484 | 0.1516 | 0.8484 | 0.8516 | 2203 | 25280 | 72516 | 2297 | 25719 | 71984 | 427.42  | 315.87  |
| 100000 | 1.13 | 0.1500 | 0.8500 | 2250 | 28815 | 72250 | 100.47 | 0.1484 | 0.1516 | 0.8484 | 0.8516 | 2203 | 25280 | 72516 | 2297 | 25719 | 71984 | 496.15  | 374.74  |
| 100000 | 1.14 | 0.1500 | 0.8500 | 2250 | 29070 | 72250 | 115.78 | 0.1484 | 0.1516 | 0.8484 | 0.8516 | 2203 | 25280 | 72516 | 2297 | 25719 | 71984 | 570.03  | 438.67  |
| 100000 | 1.15 | 0.1500 | 0.8500 | 2250 | 29325 | 72250 | 132.08 | 0.1484 | 0.1516 | 0.8484 | 0.8516 | 2203 | 25280 | 72516 | 2297 | 25719 | 71984 | 649.05  | 507.66  |
| 100000 | 1.16 | 0.1500 | 0.8500 | 2250 | 29580 | 72250 | 149.34 | 0.1484 | 0.1516 | 0.8484 | 0.8516 | 2203 | 25280 | 72516 | 2297 | 25719 | 71984 | 733.22  | 581.70  |
| 100000 | 1.17 | 0.1500 | 0.8500 | 2250 | 29835 | 72250 | 167.56 | 0.1484 | 0.1516 | 0.8484 | 0.8516 | 2203 | 25280 | 72516 | 2297 | 25719 | 71984 | 822.53  | 660.80  |
| 100000 | 1.18 | 0.1500 | 0.8500 | 2250 | 30090 | 72250 | 186.71 | 0.1484 | 0.1516 | 0.8484 | 0.8516 | 2203 | 25280 | 72516 | 2297 | 25719 | 71984 | 916.99  | 744.96  |
| 100000 | 1.19 | 0.1500 | 0.8500 | 2250 | 30345 | 72250 | 206.78 | 0.1484 | 0.1516 | 0.8484 | 0.8516 | 2203 | 25280 | 72516 | 2297 | 25719 | 71984 | 1016.59 | 834.17  |
| 100000 | 1.20 | 0.1500 | 0.8500 | 2250 | 30600 | 72250 | 227.76 | 0.1484 | 0.1516 | 0.8484 | 0.8516 | 2203 | 25280 | 72516 | 2297 | 25719 | 71984 | 1121.33 | 928.44  |
| 100000 | 0.80 | 0.2000 | 0.8000 | 4000 | 25600 | 64000 | 477.55 | 0.1982 | 0.2018 | 0.7982 | 0.8018 | 3930 | 31789 | 64281 | 4070 | 32210 | 63720 | 1207.41 | 1358.84 |
| 100000 | 0.81 | 0.2000 | 0.8000 | 4000 | 25920 | 64000 | 427.29 | 0.1982 | 0.2018 | 0.7982 | 0.8018 | 3930 | 31789 | 64281 | 4070 | 32210 | 63720 | 1086.03 | 1230.68 |
| 100000 | 0.82 | 0.2000 | 0.8000 | 4000 | 26240 | 64000 | 380.24 | 0.1982 | 0.2018 | 0.7982 | 0.8018 | 3930 | 31789 | 64281 | 4070 | 32210 | 63720 | 971.09  | 1108.88 |
| 100000 | 0.83 | 0.2000 | 0.8000 | 4000 | 26560 | 64000 | 336.33 | 0.1982 | 0.2018 | 0.7982 | 0.8018 | 3930 | 31789 | 64281 | 4070 | 32210 | 63720 | 862.59  | 993.45  |
| 100000 | 0.84 | 0.2000 | 0.8000 | 4000 | 26880 | 64000 | 295.47 | 0.1982 | 0.2018 | 0.7982 | 0.8018 | 3930 | 31789 | 64281 | 4070 | 32210 | 63720 | 760.54  | 884.37  |
| 100000 | 0.85 | 0.2000 | 0.8000 | 4000 | 27200 | 64000 | 257.57 | 0.1982 | 0.2018 | 0.7982 | 0.8018 | 3930 | 31789 | 64281 | 4070 | 32210 | 63720 | 664.93  | 781.64  |
| 100000 | 0.86 | 0.2000 | 0.8000 | 4000 | 27520 | 64000 | 222.57 | 0.1982 | 0.2018 | 0.7982 | 0.8018 | 3930 | 31789 | 64281 | 4070 | 32210 | 63720 | 575.76  | 685.28  |
| 100000 | 0.87 | 0.2000 | 0.8000 | 4000 | 27840 | 64000 | 190.38 | 0.1982 | 0.2018 | 0.7982 | 0.8018 | 3930 | 31789 | 64281 | 4070 | 32210 | 63720 | 493.04  | 595.28  |
| 100000 | 0.88 | 0.2000 | 0.8000 | 4000 | 28160 | 64000 | 160.94 | 0.1982 | 0.2018 | 0.7982 | 0.8018 | 3930 | 31789 | 64281 | 4070 | 32210 | 63720 | 416.75  | 511.63  |
| 100000 | 0.89 | 0.2000 | 0.8000 | 4000 | 28480 | 64000 | 134.19 | 0.1982 | 0.2018 | 0.7982 | 0.8018 | 3930 | 31789 | 64281 | 4070 | 32210 | 63720 | 346.91  | 434.34  |
| 100000 | 0.90 | 0.2000 | 0.8000 | 4000 | 28800 | 64000 | 110.05 | 0.1982 | 0.2018 | 0.7982 | 0.8018 | 3930 | 31789 | 64281 | 4070 | 32210 | 63720 | 283.51  | 363.41  |
| 100000 | 0.91 | 0.2000 | 0.8000 | 4000 | 29120 | 64000 | 88.47  | 0.1982 | 0.2018 | 0.7982 | 0.8018 | 3930 | 31789 | 64281 | 4070 | 32210 | 63720 | 226.56  | 298.84  |
| 100000 | 0.92 | 0.2000 | 0.8000 | 4000 | 29440 | 64000 | 69.38  | 0.1982 | 0.2018 | 0.7982 | 0.8018 | 3930 | 31789 | 64281 | 4070 | 32210 | 63720 | 176.04  | 240.63  |
| 100000 | 0.93 | 0.2000 | 0.8000 | 4000 | 29760 | 64000 | 52.72  | 0.1982 | 0.2018 | 0.7982 | 0.8018 | 3930 | 31789 | 64281 | 4070 | 32210 | 63720 | 131.97  | 188.77  |
| 100000 | 0.94 | 0.2000 | 0.8000 | 4000 | 30080 | 64000 | 38.45  | 0.1982 | 0.2018 | 0.7982 | 0.8018 | 3930 | 31789 | 64281 | 4070 | 32210 | 63720 | 94.35   | 143.27  |
| 100000 | 0.95 | 0.2000 | 0.8000 | 4000 | 30400 | 64000 | 26.51  | 0.1982 | 0.2018 | 0.7982 | 0.8018 | 3930 | 31789 | 64281 | 4070 | 32210 | 63720 | 63.16   | 104.13  |
| 100000 | 0.96 | 0.2000 | 0.8000 | 4000 | 30720 | 64000 | 16.85  | 0.1982 | 0.2018 | 0.7982 | 0.8018 | 3930 | 31789 | 64281 | 4070 | 32210 | 63720 | 38.42   | 71.35   |
| 100000 | 0.97 | 0.2000 | 0.8000 | 4000 | 31040 | 64000 | 9.41   | 0.1982 | 0.2018 | 0.7982 | 0.8018 | 3930 | 31789 | 64281 | 4070 | 32210 | 63720 | 20.12   | 44.93   |
| 100000 | 0.98 | 0.2000 | 0.8000 | 4000 | 31360 | 64000 | 4.15   | 0.1982 | 0.2018 | 0.7982 | 0.8018 | 3930 | 31789 | 64281 | 4070 | 32210 | 63720 | 8.26    | 24.87   |

|        |      |        |        |      |       |       |        |        |        |        |        |      |       |       |      |       |       |         |         |
|--------|------|--------|--------|------|-------|-------|--------|--------|--------|--------|--------|------|-------|-------|------|-------|-------|---------|---------|
| 100000 | 0.99 | 0.2000 | 0.8000 | 4000 | 31680 | 64000 | 1.03   | 0.1982 | 0.2018 | 0.7982 | 0.8018 | 3930 | 31789 | 64281 | 4070 | 32210 | 63720 | 2.84    | 11.16   |
| 100000 | 1.00 | 0.2000 | 0.8000 | 4000 | 32000 | 64000 | 0.00   | 0.1982 | 0.2018 | 0.7982 | 0.8018 | 3930 | 31789 | 64281 | 4070 | 32210 | 63720 | 3.87    | 3.82    |
| 100000 | 1.01 | 0.2000 | 0.8000 | 4000 | 32320 | 64000 | 1.02   | 0.1982 | 0.2018 | 0.7982 | 0.8018 | 3930 | 31789 | 64281 | 4070 | 32210 | 63720 | 11.34   | 2.83    |
| 100000 | 1.02 | 0.2000 | 0.8000 | 4000 | 32640 | 64000 | 4.04   | 0.1982 | 0.2018 | 0.7982 | 0.8018 | 3930 | 31789 | 64281 | 4070 | 32210 | 63720 | 25.25   | 8.20    |
| 100000 | 1.03 | 0.2000 | 0.8000 | 4000 | 32960 | 64000 | 9.03   | 0.1982 | 0.2018 | 0.7982 | 0.8018 | 3930 | 31789 | 64281 | 4070 | 32210 | 63720 | 45.60   | 19.93   |
| 100000 | 1.04 | 0.2000 | 0.8000 | 4000 | 33280 | 64000 | 15.95  | 0.1982 | 0.2018 | 0.7982 | 0.8018 | 3930 | 31789 | 64281 | 4070 | 32210 | 63720 | 72.40   | 38.01   |
| 100000 | 1.05 | 0.2000 | 0.8000 | 4000 | 33600 | 64000 | 24.77  | 0.1982 | 0.2018 | 0.7982 | 0.8018 | 3930 | 31789 | 64281 | 4070 | 32210 | 63720 | 105.64  | 62.46   |
| 100000 | 1.06 | 0.2000 | 0.8000 | 4000 | 33920 | 64000 | 35.44  | 0.1982 | 0.2018 | 0.7982 | 0.8018 | 3930 | 31789 | 64281 | 4070 | 32210 | 63720 | 145.32  | 93.26   |
| 100000 | 1.07 | 0.2000 | 0.8000 | 4000 | 34240 | 64000 | 47.93  | 0.1982 | 0.2018 | 0.7982 | 0.8018 | 3930 | 31789 | 64281 | 4070 | 32210 | 63720 | 191.44  | 130.42  |
| 100000 | 1.08 | 0.2000 | 0.8000 | 4000 | 34560 | 64000 | 62.21  | 0.1982 | 0.2018 | 0.7982 | 0.8018 | 3930 | 31789 | 64281 | 4070 | 32210 | 63720 | 244.01  | 173.94  |
| 100000 | 1.09 | 0.2000 | 0.8000 | 4000 | 34880 | 64000 | 78.25  | 0.1982 | 0.2018 | 0.7982 | 0.8018 | 3930 | 31789 | 64281 | 4070 | 32210 | 63720 | 303.02  | 223.82  |
| 100000 | 1.10 | 0.2000 | 0.8000 | 4000 | 35200 | 64000 | 96.01  | 0.1982 | 0.2018 | 0.7982 | 0.8018 | 3930 | 31789 | 64281 | 4070 | 32210 | 63720 | 368.47  | 280.05  |
| 100000 | 1.11 | 0.2000 | 0.8000 | 4000 | 35520 | 64000 | 115.47 | 0.1982 | 0.2018 | 0.7982 | 0.8018 | 3930 | 31789 | 64281 | 4070 | 32210 | 63720 | 440.36  | 342.65  |
| 100000 | 1.12 | 0.2000 | 0.8000 | 4000 | 35840 | 64000 | 136.59 | 0.1982 | 0.2018 | 0.7982 | 0.8018 | 3930 | 31789 | 64281 | 4070 | 32210 | 63720 | 518.70  | 411.60  |
| 100000 | 1.13 | 0.2000 | 0.8000 | 4000 | 36160 | 64000 | 159.35 | 0.1982 | 0.2018 | 0.7982 | 0.8018 | 3930 | 31789 | 64281 | 4070 | 32210 | 63720 | 603.48  | 486.91  |
| 100000 | 1.14 | 0.2000 | 0.8000 | 4000 | 36480 | 64000 | 183.72 | 0.1982 | 0.2018 | 0.7982 | 0.8018 | 3930 | 31789 | 64281 | 4070 | 32210 | 63720 | 694.70  | 568.58  |
| 100000 | 1.15 | 0.2000 | 0.8000 | 4000 | 36800 | 64000 | 209.68 | 0.1982 | 0.2018 | 0.7982 | 0.8018 | 3930 | 31789 | 64281 | 4070 | 32210 | 63720 | 792.36  | 656.61  |
| 100000 | 1.16 | 0.2000 | 0.8000 | 4000 | 37120 | 64000 | 237.19 | 0.1982 | 0.2018 | 0.7982 | 0.8018 | 3930 | 31789 | 64281 | 4070 | 32210 | 63720 | 896.47  | 751.00  |
| 100000 | 1.17 | 0.2000 | 0.8000 | 4000 | 37440 | 64000 | 266.23 | 0.1982 | 0.2018 | 0.7982 | 0.8018 | 3930 | 31789 | 64281 | 4070 | 32210 | 63720 | 1007.02 | 851.74  |
| 100000 | 1.18 | 0.2000 | 0.8000 | 4000 | 37760 | 64000 | 296.79 | 0.1982 | 0.2018 | 0.7982 | 0.8018 | 3930 | 31789 | 64281 | 4070 | 32210 | 63720 | 1124.01 | 958.84  |
| 100000 | 1.19 | 0.2000 | 0.8000 | 4000 | 38080 | 64000 | 328.83 | 0.1982 | 0.2018 | 0.7982 | 0.8018 | 3930 | 31789 | 64281 | 4070 | 32210 | 63720 | 1247.44 | 1072.31 |
| 100000 | 1.20 | 0.2000 | 0.8000 | 4000 | 38400 | 64000 | 362.33 | 0.1982 | 0.2018 | 0.7982 | 0.8018 | 3930 | 31789 | 64281 | 4070 | 32210 | 63720 | 1377.32 | 1192.13 |
| 100000 | 0.80 | 0.2500 | 0.7500 | 6250 | 30000 | 56250 | 646.34 | 0.2481 | 0.2519 | 0.7481 | 0.7519 | 6155 | 37310 | 56535 | 6345 | 37689 | 55966 | 1434.93 | 1571.54 |
| 100000 | 0.81 | 0.2500 | 0.7500 | 6250 | 30375 | 56250 | 578.85 | 0.2481 | 0.2519 | 0.7481 | 0.7519 | 6155 | 37310 | 56535 | 6345 | 37689 | 55966 | 1291.77 | 1422.26 |
| 100000 | 0.82 | 0.2500 | 0.7500 | 6250 | 30750 | 56250 | 515.58 | 0.2481 | 0.2519 | 0.7481 | 0.7519 | 6155 | 37310 | 56535 | 6345 | 37689 | 55966 | 1156.14 | 1280.45 |
| 100000 | 0.83 | 0.2500 | 0.7500 | 6250 | 31125 | 56250 | 456.44 | 0.2481 | 0.2519 | 0.7481 | 0.7519 | 6155 | 37310 | 56535 | 6345 | 37689 | 55966 | 1028.05 | 1146.09 |
| 100000 | 0.84 | 0.2500 | 0.7500 | 6250 | 31500 | 56250 | 401.33 | 0.2481 | 0.2519 | 0.7481 | 0.7519 | 6155 | 37310 | 56535 | 6345 | 37689 | 55966 | 907.49  | 1019.20 |
| 100000 | 0.85 | 0.2500 | 0.7500 | 6250 | 31875 | 56250 | 350.14 | 0.2481 | 0.2519 | 0.7481 | 0.7519 | 6155 | 37310 | 56535 | 6345 | 37689 | 55966 | 794.48  | 899.77  |
| 100000 | 0.86 | 0.2500 | 0.7500 | 6250 | 32250 | 56250 | 302.80 | 0.2481 | 0.2519 | 0.7481 | 0.7519 | 6155 | 37310 | 56535 | 6345 | 37689 | 55966 | 689.00  | 787.81  |
| 100000 | 0.87 | 0.2500 | 0.7500 | 6250 | 32625 | 56250 | 259.22 | 0.2481 | 0.2519 | 0.7481 | 0.7519 | 6155 | 37310 | 56535 | 6345 | 37689 | 55966 | 591.07  | 683.30  |
| 100000 | 0.88 | 0.2500 | 0.7500 | 6250 | 33000 | 56250 | 219.31 | 0.2481 | 0.2519 | 0.7481 | 0.7519 | 6155 | 37310 | 56535 | 6345 | 37689 | 55966 | 500.67  | 586.26  |
| 100000 | 0.89 | 0.2500 | 0.7500 | 6250 | 33375 | 56250 | 182.99 | 0.2481 | 0.2519 | 0.7481 | 0.7519 | 6155 | 37310 | 56535 | 6345 | 37689 | 55966 | 417.80  | 496.68  |
| 100000 | 0.90 | 0.2500 | 0.7500 | 6250 | 33750 | 56250 | 150.18 | 0.2481 | 0.2519 | 0.7481 | 0.7519 | 6155 | 37310 | 56535 | 6345 | 37689 | 55966 | 342.48  | 414.56  |
| 100000 | 0.91 | 0.2500 | 0.7500 | 6250 | 34125 | 56250 | 120.81 | 0.2481 | 0.2519 | 0.7481 | 0.7519 | 6155 | 37310 | 56535 | 6345 | 37689 | 55966 | 274.70  | 339.91  |
| 100000 | 0.92 | 0.2500 | 0.7500 | 6250 | 34500 | 56250 | 94.81  | 0.2481 | 0.2519 | 0.7481 | 0.7519 | 6155 | 37310 | 56535 | 6345 | 37689 | 55966 | 214.45  | 272.72  |

|        |      |        |        |      |       |       |        |        |        |        |        |      |       |       |      |       |       |         |         |
|--------|------|--------|--------|------|-------|-------|--------|--------|--------|--------|--------|------|-------|-------|------|-------|-------|---------|---------|
| 100000 | 0.93 | 0.2500 | 0.7500 | 6250 | 34875 | 56250 | 72.10  | 0.2481 | 0.2519 | 0.7481 | 0.7519 | 6155 | 37310 | 56535 | 6345 | 37689 | 55966 | 161.74  | 212.99  |
| 100000 | 0.94 | 0.2500 | 0.7500 | 6250 | 35250 | 56250 | 52.62  | 0.2481 | 0.2519 | 0.7481 | 0.7519 | 6155 | 37310 | 56535 | 6345 | 37689 | 55966 | 116.57  | 160.72  |
| 100000 | 0.95 | 0.2500 | 0.7500 | 6250 | 35625 | 56250 | 36.30  | 0.2481 | 0.2519 | 0.7481 | 0.7519 | 6155 | 37310 | 56535 | 6345 | 37689 | 55966 | 78.94   | 115.91  |
| 100000 | 0.96 | 0.2500 | 0.7500 | 6250 | 36000 | 56250 | 23.08  | 0.2481 | 0.2519 | 0.7481 | 0.7519 | 6155 | 37310 | 56535 | 6345 | 37689 | 55966 | 48.85   | 78.57   |
| 100000 | 0.97 | 0.2500 | 0.7500 | 6250 | 36375 | 56250 | 12.90  | 0.2481 | 0.2519 | 0.7481 | 0.7519 | 6155 | 37310 | 56535 | 6345 | 37689 | 55966 | 26.30   | 48.69   |
| 100000 | 0.98 | 0.2500 | 0.7500 | 6250 | 36750 | 56250 | 5.70   | 0.2481 | 0.2519 | 0.7481 | 0.7519 | 6155 | 37310 | 56535 | 6345 | 37689 | 55966 | 11.28   | 26.27   |
| 100000 | 0.99 | 0.2500 | 0.7500 | 6250 | 37125 | 56250 | 1.42   | 0.2481 | 0.2519 | 0.7481 | 0.7519 | 6155 | 37310 | 56535 | 6345 | 37689 | 55966 | 3.80    | 11.32   |
| 100000 | 1.00 | 0.2500 | 0.7500 | 6250 | 37500 | 56250 | 0.00   | 0.2481 | 0.2519 | 0.7481 | 0.7519 | 6155 | 37310 | 56535 | 6345 | 37689 | 55966 | 3.86    | 3.82    |
| 100000 | 1.01 | 0.2500 | 0.7500 | 6250 | 37875 | 56250 | 1.40   | 0.2481 | 0.2519 | 0.7481 | 0.7519 | 6155 | 37310 | 56535 | 6345 | 37689 | 55966 | 11.46   | 3.79    |
| 100000 | 1.02 | 0.2500 | 0.7500 | 6250 | 38250 | 56250 | 5.56   | 0.2481 | 0.2519 | 0.7481 | 0.7519 | 6155 | 37310 | 56535 | 6345 | 37689 | 55966 | 26.60   | 11.22   |
| 100000 | 1.03 | 0.2500 | 0.7500 | 6250 | 38625 | 56250 | 12.42  | 0.2481 | 0.2519 | 0.7481 | 0.7519 | 6155 | 37310 | 56535 | 6345 | 37689 | 55966 | 49.27   | 26.12   |
| 100000 | 1.04 | 0.2500 | 0.7500 | 6250 | 39000 | 56250 | 21.95  | 0.2481 | 0.2519 | 0.7481 | 0.7519 | 6155 | 37310 | 56535 | 6345 | 37689 | 55966 | 79.49   | 48.47   |
| 100000 | 1.05 | 0.2500 | 0.7500 | 6250 | 39375 | 56250 | 34.10  | 0.2481 | 0.2519 | 0.7481 | 0.7519 | 6155 | 37310 | 56535 | 6345 | 37689 | 55966 | 117.24  | 78.29   |
| 100000 | 1.06 | 0.2500 | 0.7500 | 6250 | 39750 | 56250 | 48.81  | 0.2481 | 0.2519 | 0.7481 | 0.7519 | 6155 | 37310 | 56535 | 6345 | 37689 | 55966 | 162.53  | 115.57  |
| 100000 | 1.07 | 0.2500 | 0.7500 | 6250 | 40125 | 56250 | 66.05  | 0.2481 | 0.2519 | 0.7481 | 0.7519 | 6155 | 37310 | 56535 | 6345 | 37689 | 55966 | 215.36  | 160.32  |
| 100000 | 1.08 | 0.2500 | 0.7500 | 6250 | 40500 | 56250 | 85.77  | 0.2481 | 0.2519 | 0.7481 | 0.7519 | 6155 | 37310 | 56535 | 6345 | 37689 | 55966 | 275.72  | 212.52  |
| 100000 | 1.09 | 0.2500 | 0.7500 | 6250 | 40875 | 56250 | 107.93 | 0.2481 | 0.2519 | 0.7481 | 0.7519 | 6155 | 37310 | 56535 | 6345 | 37689 | 55966 | 343.63  | 272.19  |
| 100000 | 1.10 | 0.2500 | 0.7500 | 6250 | 41250 | 56250 | 132.48 | 0.2481 | 0.2519 | 0.7481 | 0.7519 | 6155 | 37310 | 56535 | 6345 | 37689 | 55966 | 419.07  | 339.32  |
| 100000 | 1.11 | 0.2500 | 0.7500 | 6250 | 41625 | 56250 | 159.40 | 0.2481 | 0.2519 | 0.7481 | 0.7519 | 6155 | 37310 | 56535 | 6345 | 37689 | 55966 | 502.05  | 413.91  |
| 100000 | 1.12 | 0.2500 | 0.7500 | 6250 | 42000 | 56250 | 188.64 | 0.2481 | 0.2519 | 0.7481 | 0.7519 | 6155 | 37310 | 56535 | 6345 | 37689 | 55966 | 592.57  | 495.97  |
| 100000 | 1.13 | 0.2500 | 0.7500 | 6250 | 42375 | 56250 | 220.16 | 0.2481 | 0.2519 | 0.7481 | 0.7519 | 6155 | 37310 | 56535 | 6345 | 37689 | 55966 | 690.63  | 585.49  |
| 100000 | 1.14 | 0.2500 | 0.7500 | 6250 | 42750 | 56250 | 253.92 | 0.2481 | 0.2519 | 0.7481 | 0.7519 | 6155 | 37310 | 56535 | 6345 | 37689 | 55966 | 796.23  | 682.47  |
| 100000 | 1.15 | 0.2500 | 0.7500 | 6250 | 43125 | 56250 | 289.90 | 0.2481 | 0.2519 | 0.7481 | 0.7519 | 6155 | 37310 | 56535 | 6345 | 37689 | 55966 | 909.36  | 786.91  |
| 100000 | 1.16 | 0.2500 | 0.7500 | 6250 | 43500 | 56250 | 328.06 | 0.2481 | 0.2519 | 0.7481 | 0.7519 | 6155 | 37310 | 56535 | 6345 | 37689 | 55966 | 1030.03 | 898.81  |
| 100000 | 1.17 | 0.2500 | 0.7500 | 6250 | 43875 | 56250 | 368.36 | 0.2481 | 0.2519 | 0.7481 | 0.7519 | 6155 | 37310 | 56535 | 6345 | 37689 | 55966 | 1158.24 | 1018.18 |
| 100000 | 1.18 | 0.2500 | 0.7500 | 6250 | 44250 | 56250 | 410.78 | 0.2481 | 0.2519 | 0.7481 | 0.7519 | 6155 | 37310 | 56535 | 6345 | 37689 | 55966 | 1293.99 | 1145.01 |
| 100000 | 1.19 | 0.2500 | 0.7500 | 6250 | 44625 | 56250 | 455.27 | 0.2481 | 0.2519 | 0.7481 | 0.7519 | 6155 | 37310 | 56535 | 6345 | 37689 | 55966 | 1437.28 | 1279.30 |
| 100000 | 1.20 | 0.2500 | 0.7500 | 6250 | 45000 | 56250 | 501.81 | 0.2481 | 0.2519 | 0.7481 | 0.7519 | 6155 | 37310 | 56535 | 6345 | 37689 | 55966 | 1588.11 | 1421.06 |
| 100000 | 0.80 | 0.3000 | 0.7000 | 9000 | 33600 | 49000 | 801.10 | 0.2980 | 0.3020 | 0.6980 | 0.7020 | 8880 | 41839 | 49282 | 9121 | 42160 | 48719 | 1625.50 | 1741.16 |
| 100000 | 0.81 | 0.3000 | 0.7000 | 9000 | 34020 | 49000 | 718.00 | 0.2980 | 0.3020 | 0.6980 | 0.7020 | 8880 | 41839 | 49282 | 9121 | 42160 | 48719 | 1464.31 | 1574.80 |
| 100000 | 0.82 | 0.3000 | 0.7000 | 9000 | 34440 | 49000 | 640.00 | 0.2980 | 0.3020 | 0.6980 | 0.7020 | 8880 | 41839 | 49282 | 9121 | 42160 | 48719 | 1311.55 | 1416.80 |
| 100000 | 0.83 | 0.3000 | 0.7000 | 9000 | 34860 | 49000 | 567.00 | 0.2980 | 0.3020 | 0.6980 | 0.7020 | 8880 | 41839 | 49282 | 9121 | 42160 | 48719 | 1167.23 | 1267.17 |
| 100000 | 0.84 | 0.3000 | 0.7000 | 9000 | 35280 | 49000 | 498.89 | 0.2980 | 0.3020 | 0.6980 | 0.7020 | 8880 | 41839 | 49282 | 9121 | 42160 | 48719 | 1031.33 | 1125.91 |
| 100000 | 0.85 | 0.3000 | 0.7000 | 9000 | 35700 | 49000 | 435.56 | 0.2980 | 0.3020 | 0.6980 | 0.7020 | 8880 | 41839 | 49282 | 9121 | 42160 | 48719 | 903.87  | 993.02  |
| 100000 | 0.86 | 0.3000 | 0.7000 | 9000 | 36120 | 49000 | 376.93 | 0.2980 | 0.3020 | 0.6980 | 0.7020 | 8880 | 41839 | 49282 | 9121 | 42160 | 48719 | 784.85  | 868.50  |

|        |      |        |        |       |       |       |        |        |        |        |        |       |       |       |       |       |       |         |         |
|--------|------|--------|--------|-------|-------|-------|--------|--------|--------|--------|--------|-------|-------|-------|-------|-------|-------|---------|---------|
| 100000 | 0.87 | 0.3000 | 0.7000 | 9000  | 36540 | 49000 | 322.89 | 0.2980 | 0.3020 | 0.6980 | 0.7020 | 8880  | 41839 | 49282 | 9121  | 42160 | 48719 | 674.25  | 752.34  |
| 100000 | 0.88 | 0.3000 | 0.7000 | 9000  | 36960 | 49000 | 273.35 | 0.2980 | 0.3020 | 0.6980 | 0.7020 | 8880  | 41839 | 49282 | 9121  | 42160 | 48719 | 572.09  | 644.56  |
| 100000 | 0.89 | 0.3000 | 0.7000 | 9000  | 37380 | 49000 | 228.22 | 0.2980 | 0.3020 | 0.6980 | 0.7020 | 8880  | 41839 | 49282 | 9121  | 42160 | 48719 | 478.36  | 545.14  |
| 100000 | 0.90 | 0.3000 | 0.7000 | 9000  | 37800 | 49000 | 187.41 | 0.2980 | 0.3020 | 0.6980 | 0.7020 | 8880  | 41839 | 49282 | 9121  | 42160 | 48719 | 393.06  | 454.09  |
| 100000 | 0.91 | 0.3000 | 0.7000 | 9000  | 38220 | 49000 | 150.85 | 0.2980 | 0.3020 | 0.6980 | 0.7020 | 8880  | 41839 | 49282 | 9121  | 42160 | 48719 | 316.19  | 371.40  |
| 100000 | 0.92 | 0.3000 | 0.7000 | 9000  | 38640 | 49000 | 118.45 | 0.2980 | 0.3020 | 0.6980 | 0.7020 | 8880  | 41839 | 49282 | 9121  | 42160 | 48719 | 247.76  | 297.09  |
| 100000 | 0.93 | 0.3000 | 0.7000 | 9000  | 39060 | 49000 | 90.13  | 0.2980 | 0.3020 | 0.6980 | 0.7020 | 8880  | 41839 | 49282 | 9121  | 42160 | 48719 | 187.76  | 231.14  |
| 100000 | 0.94 | 0.3000 | 0.7000 | 9000  | 39480 | 49000 | 65.81  | 0.2980 | 0.3020 | 0.6980 | 0.7020 | 8880  | 41839 | 49282 | 9121  | 42160 | 48719 | 136.19  | 173.56  |
| 100000 | 0.95 | 0.3000 | 0.7000 | 9000  | 39900 | 49000 | 45.43  | 0.2980 | 0.3020 | 0.6980 | 0.7020 | 8880  | 41839 | 49282 | 9121  | 42160 | 48719 | 93.05   | 124.35  |
| 100000 | 0.96 | 0.3000 | 0.7000 | 9000  | 40320 | 49000 | 28.90  | 0.2980 | 0.3020 | 0.6980 | 0.7020 | 8880  | 41839 | 49282 | 9121  | 42160 | 48719 | 58.35   | 83.51   |
| 100000 | 0.97 | 0.3000 | 0.7000 | 9000  | 40740 | 49000 | 16.16  | 0.2980 | 0.3020 | 0.6980 | 0.7020 | 8880  | 41839 | 49282 | 9121  | 42160 | 48719 | 32.08   | 51.04   |
| 100000 | 0.98 | 0.3000 | 0.7000 | 9000  | 41160 | 49000 | 7.14   | 0.2980 | 0.3020 | 0.6980 | 0.7020 | 8880  | 41839 | 49282 | 9121  | 42160 | 48719 | 14.24   | 26.93   |
| 100000 | 0.99 | 0.3000 | 0.7000 | 9000  | 41580 | 49000 | 1.77   | 0.2980 | 0.3020 | 0.6980 | 0.7020 | 8880  | 41839 | 49282 | 9121  | 42160 | 48719 | 4.83    | 11.20   |
| 100000 | 1.00 | 0.3000 | 0.7000 | 9000  | 42000 | 49000 | 0.00   | 0.2980 | 0.3020 | 0.6980 | 0.7020 | 8880  | 41839 | 49282 | 9121  | 42160 | 48719 | 3.86    | 3.83    |
| 100000 | 1.01 | 0.3000 | 0.7000 | 9000  | 42420 | 49000 | 1.75   | 0.2980 | 0.3020 | 0.6980 | 0.7020 | 8880  | 41839 | 49282 | 9121  | 42160 | 48719 | 11.31   | 4.83    |
| 100000 | 1.02 | 0.3000 | 0.7000 | 9000  | 42840 | 49000 | 6.98   | 0.2980 | 0.3020 | 0.6980 | 0.7020 | 8880  | 41839 | 49282 | 9121  | 42160 | 48719 | 27.21   | 14.19   |
| 100000 | 1.03 | 0.3000 | 0.7000 | 9000  | 43260 | 49000 | 15.61  | 0.2980 | 0.3020 | 0.6980 | 0.7020 | 8880  | 41839 | 49282 | 9121  | 42160 | 48719 | 51.53   | 31.93   |
| 100000 | 1.04 | 0.3000 | 0.7000 | 9000  | 43680 | 49000 | 27.59  | 0.2980 | 0.3020 | 0.6980 | 0.7020 | 8880  | 41839 | 49282 | 9121  | 42160 | 48719 | 84.28   | 58.03   |
| 100000 | 1.05 | 0.3000 | 0.7000 | 9000  | 44100 | 49000 | 42.86  | 0.2980 | 0.3020 | 0.6980 | 0.7020 | 8880  | 41839 | 49282 | 9121  | 42160 | 48719 | 125.47  | 92.50   |
| 100000 | 1.06 | 0.3000 | 0.7000 | 9000  | 44520 | 49000 | 61.38  | 0.2980 | 0.3020 | 0.6980 | 0.7020 | 8880  | 41839 | 49282 | 9121  | 42160 | 48719 | 175.09  | 135.34  |
| 100000 | 1.07 | 0.3000 | 0.7000 | 9000  | 44940 | 49000 | 83.09  | 0.2980 | 0.3020 | 0.6980 | 0.7020 | 8880  | 41839 | 49282 | 9121  | 42160 | 48719 | 233.15  | 186.55  |
| 100000 | 1.08 | 0.3000 | 0.7000 | 9000  | 45360 | 49000 | 107.94 | 0.2980 | 0.3020 | 0.6980 | 0.7020 | 8880  | 41839 | 49282 | 9121  | 42160 | 48719 | 299.63  | 246.13  |
| 100000 | 1.09 | 0.3000 | 0.7000 | 9000  | 45780 | 49000 | 135.87 | 0.2980 | 0.3020 | 0.6980 | 0.7020 | 8880  | 41839 | 49282 | 9121  | 42160 | 48719 | 374.55  | 314.07  |
| 100000 | 1.10 | 0.3000 | 0.7000 | 9000  | 46200 | 49000 | 166.84 | 0.2980 | 0.3020 | 0.6980 | 0.7020 | 8880  | 41839 | 49282 | 9121  | 42160 | 48719 | 457.90  | 390.38  |
| 100000 | 1.11 | 0.3000 | 0.7000 | 9000  | 46620 | 49000 | 200.80 | 0.2980 | 0.3020 | 0.6980 | 0.7020 | 8880  | 41839 | 49282 | 9121  | 42160 | 48719 | 549.68  | 475.06  |
| 100000 | 1.12 | 0.3000 | 0.7000 | 9000  | 47040 | 49000 | 237.71 | 0.2980 | 0.3020 | 0.6980 | 0.7020 | 8880  | 41839 | 49282 | 9121  | 42160 | 48719 | 649.90  | 568.11  |
| 100000 | 1.13 | 0.3000 | 0.7000 | 9000  | 47460 | 49000 | 277.52 | 0.2980 | 0.3020 | 0.6980 | 0.7020 | 8880  | 41839 | 49282 | 9121  | 42160 | 48719 | 758.54  | 669.53  |
| 100000 | 1.14 | 0.3000 | 0.7000 | 9000  | 47880 | 49000 | 320.18 | 0.2980 | 0.3020 | 0.6980 | 0.7020 | 8880  | 41839 | 49282 | 9121  | 42160 | 48719 | 875.62  | 779.31  |
| 100000 | 1.15 | 0.3000 | 0.7000 | 9000  | 48300 | 49000 | 365.66 | 0.2980 | 0.3020 | 0.6980 | 0.7020 | 8880  | 41839 | 49282 | 9121  | 42160 | 48719 | 1001.13 | 897.47  |
| 100000 | 1.16 | 0.3000 | 0.7000 | 9000  | 48720 | 49000 | 413.90 | 0.2980 | 0.3020 | 0.6980 | 0.7020 | 8880  | 41839 | 49282 | 9121  | 42160 | 48719 | 1135.08 | 1023.99 |
| 100000 | 1.17 | 0.3000 | 0.7000 | 9000  | 49140 | 49000 | 464.88 | 0.2980 | 0.3020 | 0.6980 | 0.7020 | 8880  | 41839 | 49282 | 9121  | 42160 | 48719 | 1277.46 | 1158.88 |
| 100000 | 1.18 | 0.3000 | 0.7000 | 9000  | 49560 | 49000 | 518.55 | 0.2980 | 0.3020 | 0.6980 | 0.7020 | 8880  | 41839 | 49282 | 9121  | 42160 | 48719 | 1428.27 | 1302.13 |
| 100000 | 1.19 | 0.3000 | 0.7000 | 9000  | 49980 | 49000 | 574.87 | 0.2980 | 0.3020 | 0.6980 | 0.7020 | 8880  | 41839 | 49282 | 9121  | 42160 | 48719 | 1587.51 | 1453.76 |
| 100000 | 1.20 | 0.3000 | 0.7000 | 9000  | 50400 | 49000 | 633.80 | 0.2980 | 0.3020 | 0.6980 | 0.7020 | 8880  | 41839 | 49282 | 9121  | 42160 | 48719 | 1755.18 | 1613.75 |
| 100000 | 0.80 | 0.3500 | 0.6500 | 12250 | 36400 | 42250 | 931.38 | 0.3479 | 0.3521 | 0.6479 | 0.6521 | 12104 | 45374 | 42522 | 12397 | 45625 | 41979 | 1778.26 | 1868.55 |

|        |      |        |        |       |       |       |        |        |        |        |        |       |       |       |       |       |       |         |         |
|--------|------|--------|--------|-------|-------|-------|--------|--------|--------|--------|--------|-------|-------|-------|-------|-------|-------|---------|---------|
| 100000 | 0.81 | 0.3500 | 0.6500 | 12250 | 36855 | 42250 | 835.27 | 0.3479 | 0.3521 | 0.6479 | 0.6521 | 12104 | 45374 | 42522 | 12397 | 45625 | 41979 | 1602.85 | 1689.10 |
| 100000 | 0.82 | 0.3500 | 0.6500 | 12250 | 37310 | 42250 | 744.97 | 0.3479 | 0.3521 | 0.6479 | 0.6521 | 12104 | 45374 | 42522 | 12397 | 45625 | 41979 | 1436.56 | 1518.72 |
| 100000 | 0.83 | 0.3500 | 0.6500 | 12250 | 37765 | 42250 | 660.37 | 0.3479 | 0.3521 | 0.6479 | 0.6521 | 12104 | 45374 | 42522 | 12397 | 45625 | 41979 | 1279.40 | 1357.42 |
| 100000 | 0.84 | 0.3500 | 0.6500 | 12250 | 38220 | 42250 | 581.37 | 0.3479 | 0.3521 | 0.6479 | 0.6521 | 12104 | 45374 | 42522 | 12397 | 45625 | 41979 | 1131.37 | 1205.20 |
| 100000 | 0.85 | 0.3500 | 0.6500 | 12250 | 38675 | 42250 | 507.85 | 0.3479 | 0.3521 | 0.6479 | 0.6521 | 12104 | 45374 | 42522 | 12397 | 45625 | 41979 | 992.46  | 1062.05 |
| 100000 | 0.86 | 0.3500 | 0.6500 | 12250 | 39130 | 42250 | 439.71 | 0.3479 | 0.3521 | 0.6479 | 0.6521 | 12104 | 45374 | 42522 | 12397 | 45625 | 41979 | 862.67  | 927.98  |
| 100000 | 0.87 | 0.3500 | 0.6500 | 12250 | 39585 | 42250 | 376.86 | 0.3479 | 0.3521 | 0.6479 | 0.6521 | 12104 | 45374 | 42522 | 12397 | 45625 | 41979 | 742.01  | 802.98  |
| 100000 | 0.88 | 0.3500 | 0.6500 | 12250 | 40040 | 42250 | 319.20 | 0.3479 | 0.3521 | 0.6479 | 0.6521 | 12104 | 45374 | 42522 | 12397 | 45625 | 41979 | 630.48  | 687.05  |
| 100000 | 0.89 | 0.3500 | 0.6500 | 12250 | 40495 | 42250 | 266.63 | 0.3479 | 0.3521 | 0.6479 | 0.6521 | 12104 | 45374 | 42522 | 12397 | 45625 | 41979 | 528.07  | 580.20  |
| 100000 | 0.90 | 0.3500 | 0.6500 | 12250 | 40950 | 42250 | 219.06 | 0.3479 | 0.3521 | 0.6479 | 0.6521 | 12104 | 45374 | 42522 | 12397 | 45625 | 41979 | 434.79  | 482.43  |
| 100000 | 0.91 | 0.3500 | 0.6500 | 12250 | 41405 | 42250 | 176.41 | 0.3479 | 0.3521 | 0.6479 | 0.6521 | 12104 | 45374 | 42522 | 12397 | 45625 | 41979 | 350.63  | 393.73  |
| 100000 | 0.92 | 0.3500 | 0.6500 | 12250 | 41860 | 42250 | 138.58 | 0.3479 | 0.3521 | 0.6479 | 0.6521 | 12104 | 45374 | 42522 | 12397 | 45625 | 41979 | 275.60  | 314.11  |
| 100000 | 0.93 | 0.3500 | 0.6500 | 12250 | 42315 | 42250 | 105.49 | 0.3479 | 0.3521 | 0.6479 | 0.6521 | 12104 | 45374 | 42522 | 12397 | 45625 | 41979 | 209.69  | 243.56  |
| 100000 | 0.94 | 0.3500 | 0.6500 | 12250 | 42770 | 42250 | 77.06  | 0.3479 | 0.3521 | 0.6479 | 0.6521 | 12104 | 45374 | 42522 | 12397 | 45625 | 41979 | 152.91  | 182.09  |
| 100000 | 0.95 | 0.3500 | 0.6500 | 12250 | 43225 | 42250 | 53.21  | 0.3479 | 0.3521 | 0.6479 | 0.6521 | 12104 | 45374 | 42522 | 12397 | 45625 | 41979 | 105.25  | 129.69  |
| 100000 | 0.96 | 0.3500 | 0.6500 | 12250 | 43680 | 42250 | 33.86  | 0.3479 | 0.3521 | 0.6479 | 0.6521 | 12104 | 45374 | 42522 | 12397 | 45625 | 41979 | 66.72   | 86.37   |
| 100000 | 0.97 | 0.3500 | 0.6500 | 12250 | 44135 | 42250 | 18.94  | 0.3479 | 0.3521 | 0.6479 | 0.6521 | 12104 | 45374 | 42522 | 12397 | 45625 | 41979 | 37.32   | 52.12   |
| 100000 | 0.98 | 0.3500 | 0.6500 | 12250 | 44590 | 42250 | 8.37   | 0.3479 | 0.3521 | 0.6479 | 0.6521 | 12104 | 45374 | 42522 | 12397 | 45625 | 41979 | 17.04   | 26.95   |
| 100000 | 0.99 | 0.3500 | 0.6500 | 12250 | 45045 | 42250 | 2.08   | 0.3479 | 0.3521 | 0.6479 | 0.6521 | 12104 | 45374 | 42522 | 12397 | 45625 | 41979 | 5.88    | 10.85   |
| 100000 | 1.00 | 0.3500 | 0.6500 | 12250 | 45500 | 42250 | 0.00   | 0.3479 | 0.3521 | 0.6479 | 0.6521 | 12104 | 45374 | 42522 | 12397 | 45625 | 41979 | 3.85    | 3.83    |
| 100000 | 1.01 | 0.3500 | 0.6500 | 12250 | 45955 | 42250 | 2.06   | 0.3479 | 0.3521 | 0.6479 | 0.6521 | 12104 | 45374 | 42522 | 12397 | 45625 | 41979 | 10.95   | 5.88    |
| 100000 | 1.02 | 0.3500 | 0.6500 | 12250 | 46410 | 42250 | 8.19   | 0.3479 | 0.3521 | 0.6479 | 0.6521 | 12104 | 45374 | 42522 | 12397 | 45625 | 41979 | 27.17   | 17.01   |
| 100000 | 1.03 | 0.3500 | 0.6500 | 12250 | 46865 | 42250 | 18.33  | 0.3479 | 0.3521 | 0.6479 | 0.6521 | 12104 | 45374 | 42522 | 12397 | 45625 | 41979 | 52.52   | 37.22   |
| 100000 | 1.04 | 0.3500 | 0.6500 | 12250 | 47320 | 42250 | 32.42  | 0.3479 | 0.3521 | 0.6479 | 0.6521 | 12104 | 45374 | 42522 | 12397 | 45625 | 41979 | 86.99   | 66.50   |
| 100000 | 1.05 | 0.3500 | 0.6500 | 12250 | 47775 | 42250 | 50.39  | 0.3479 | 0.3521 | 0.6479 | 0.6521 | 12104 | 45374 | 42522 | 12397 | 45625 | 41979 | 130.58  | 104.85  |
| 100000 | 1.06 | 0.3500 | 0.6500 | 12250 | 48230 | 42250 | 72.18  | 0.3479 | 0.3521 | 0.6479 | 0.6521 | 12104 | 45374 | 42522 | 12397 | 45625 | 41979 | 183.31  | 152.28  |
| 100000 | 1.07 | 0.3500 | 0.6500 | 12250 | 48685 | 42250 | 97.73  | 0.3479 | 0.3521 | 0.6479 | 0.6521 | 12104 | 45374 | 42522 | 12397 | 45625 | 41979 | 245.15  | 208.78  |
| 100000 | 1.08 | 0.3500 | 0.6500 | 12250 | 49140 | 42250 | 126.99 | 0.3479 | 0.3521 | 0.6479 | 0.6521 | 12104 | 45374 | 42522 | 12397 | 45625 | 41979 | 316.13  | 274.36  |
| 100000 | 1.09 | 0.3500 | 0.6500 | 12250 | 49595 | 42250 | 159.90 | 0.3479 | 0.3521 | 0.6479 | 0.6521 | 12104 | 45374 | 42522 | 12397 | 45625 | 41979 | 396.23  | 349.02  |
| 100000 | 1.10 | 0.3500 | 0.6500 | 12250 | 50050 | 42250 | 196.40 | 0.3479 | 0.3521 | 0.6479 | 0.6521 | 12104 | 45374 | 42522 | 12397 | 45625 | 41979 | 485.45  | 432.75  |
| 100000 | 1.11 | 0.3500 | 0.6500 | 12250 | 50505 | 42250 | 236.44 | 0.3479 | 0.3521 | 0.6479 | 0.6521 | 12104 | 45374 | 42522 | 12397 | 45625 | 41979 | 583.80  | 525.55  |
| 100000 | 1.12 | 0.3500 | 0.6500 | 12250 | 50960 | 42250 | 279.97 | 0.3479 | 0.3521 | 0.6479 | 0.6521 | 12104 | 45374 | 42522 | 12397 | 45625 | 41979 | 691.27  | 627.43  |
| 100000 | 1.13 | 0.3500 | 0.6500 | 12250 | 51415 | 42250 | 326.93 | 0.3479 | 0.3521 | 0.6479 | 0.6521 | 12104 | 45374 | 42522 | 12397 | 45625 | 41979 | 807.87  | 738.39  |
| 100000 | 1.14 | 0.3500 | 0.6500 | 12250 | 51870 | 42250 | 377.28 | 0.3479 | 0.3521 | 0.6479 | 0.6521 | 12104 | 45374 | 42522 | 12397 | 45625 | 41979 | 933.60  | 858.42  |
| 100000 | 1.15 | 0.3500 | 0.6500 | 12250 | 52325 | 42250 | 430.96 | 0.3479 | 0.3521 | 0.6479 | 0.6521 | 12104 | 45374 | 42522 | 12397 | 45625 | 41979 | 1068.45 | 987.52  |

|        |      |        |        |       |       |       |          |        |        |        |        |       |       |       |       |       |       |         |         |
|--------|------|--------|--------|-------|-------|-------|----------|--------|--------|--------|--------|-------|-------|-------|-------|-------|-------|---------|---------|
| 100000 | 1.16 | 0.3500 | 0.6500 | 12250 | 52780 | 42250 | 487.94   | 0.3479 | 0.3521 | 0.6479 | 0.6521 | 12104 | 45374 | 42522 | 12397 | 45625 | 41979 | 1212.42 | 1125.70 |
| 100000 | 1.17 | 0.3500 | 0.6500 | 12250 | 53235 | 42250 | 548.15   | 0.3479 | 0.3521 | 0.6479 | 0.6521 | 12104 | 45374 | 42522 | 12397 | 45625 | 41979 | 1365.52 | 1272.96 |
| 100000 | 1.18 | 0.3500 | 0.6500 | 12250 | 53690 | 42250 | 611.55   | 0.3479 | 0.3521 | 0.6479 | 0.6521 | 12104 | 45374 | 42522 | 12397 | 45625 | 41979 | 1527.75 | 1429.29 |
| 100000 | 1.19 | 0.3500 | 0.6500 | 12250 | 54145 | 42250 | 678.11   | 0.3479 | 0.3521 | 0.6479 | 0.6521 | 12104 | 45374 | 42522 | 12397 | 45625 | 41979 | 1699.10 | 1594.70 |
| 100000 | 1.20 | 0.3500 | 0.6500 | 12250 | 54600 | 42250 | 747.77   | 0.3479 | 0.3521 | 0.6479 | 0.6521 | 12104 | 45374 | 42522 | 12397 | 45625 | 41979 | 1879.58 | 1769.18 |
| 100000 | 0.80 | 0.4000 | 0.6000 | 16000 | 38400 | 36000 | 1,029.57 | 0.3979 | 0.4021 | 0.5979 | 0.6021 | 15829 | 47913 | 36258 | 16172 | 48085 | 35743 | 1892.54 | 1954.37 |
| 100000 | 0.81 | 0.4000 | 0.6000 | 16000 | 38880 | 36000 | 923.73   | 0.3979 | 0.4021 | 0.5979 | 0.6021 | 15829 | 47913 | 36258 | 16172 | 48085 | 35743 | 1706.74 | 1765.80 |
| 100000 | 0.82 | 0.4000 | 0.6000 | 16000 | 39360 | 36000 | 824.22   | 0.3979 | 0.4021 | 0.5979 | 0.6021 | 15829 | 47913 | 36258 | 16172 | 48085 | 35743 | 1530.56 | 1586.82 |
| 100000 | 0.83 | 0.4000 | 0.6000 | 16000 | 39840 | 36000 | 730.92   | 0.3979 | 0.4021 | 0.5979 | 0.6021 | 15829 | 47913 | 36258 | 16172 | 48085 | 35743 | 1363.99 | 1417.42 |
| 100000 | 0.84 | 0.4000 | 0.6000 | 16000 | 40320 | 36000 | 643.73   | 0.3979 | 0.4021 | 0.5979 | 0.6021 | 15829 | 47913 | 36258 | 16172 | 48085 | 35743 | 1207.05 | 1257.60 |
| 100000 | 0.85 | 0.4000 | 0.6000 | 16000 | 40800 | 36000 | 562.55   | 0.3979 | 0.4021 | 0.5979 | 0.6021 | 15829 | 47913 | 36258 | 16172 | 48085 | 35743 | 1059.72 | 1107.37 |
| 100000 | 0.86 | 0.4000 | 0.6000 | 16000 | 41280 | 36000 | 487.26   | 0.3979 | 0.4021 | 0.5979 | 0.6021 | 15829 | 47913 | 36258 | 16172 | 48085 | 35743 | 922.00  | 966.72  |
| 100000 | 0.87 | 0.4000 | 0.6000 | 16000 | 41760 | 36000 | 417.76   | 0.3979 | 0.4021 | 0.5979 | 0.6021 | 15829 | 47913 | 36258 | 16172 | 48085 | 35743 | 793.91  | 835.65  |
| 100000 | 0.88 | 0.4000 | 0.6000 | 16000 | 42240 | 36000 | 353.97   | 0.3979 | 0.4021 | 0.5979 | 0.6021 | 15829 | 47913 | 36258 | 16172 | 48085 | 35743 | 675.43  | 714.17  |
| 100000 | 0.89 | 0.4000 | 0.6000 | 16000 | 42720 | 36000 | 295.78   | 0.3979 | 0.4021 | 0.5979 | 0.6021 | 15829 | 47913 | 36258 | 16172 | 48085 | 35743 | 566.57  | 602.27  |
| 100000 | 0.90 | 0.4000 | 0.6000 | 16000 | 43200 | 36000 | 243.09   | 0.3979 | 0.4021 | 0.5979 | 0.6021 | 15829 | 47913 | 36258 | 16172 | 48085 | 35743 | 467.33  | 499.95  |
| 100000 | 0.91 | 0.4000 | 0.6000 | 16000 | 43680 | 36000 | 195.82   | 0.3979 | 0.4021 | 0.5979 | 0.6021 | 15829 | 47913 | 36258 | 16172 | 48085 | 35743 | 377.70  | 407.21  |
| 100000 | 0.92 | 0.4000 | 0.6000 | 16000 | 44160 | 36000 | 153.88   | 0.3979 | 0.4021 | 0.5979 | 0.6021 | 15829 | 47913 | 36258 | 16172 | 48085 | 35743 | 297.69  | 324.06  |
| 100000 | 0.93 | 0.4000 | 0.6000 | 16000 | 44640 | 36000 | 117.17   | 0.3979 | 0.4021 | 0.5979 | 0.6021 | 15829 | 47913 | 36258 | 16172 | 48085 | 35743 | 227.30  | 250.49  |
| 100000 | 0.94 | 0.4000 | 0.6000 | 16000 | 45120 | 36000 | 85.62    | 0.3979 | 0.4021 | 0.5979 | 0.6021 | 15829 | 47913 | 36258 | 16172 | 48085 | 35743 | 166.53  | 186.51  |
| 100000 | 0.95 | 0.4000 | 0.6000 | 16000 | 45600 | 36000 | 59.14    | 0.3979 | 0.4021 | 0.5979 | 0.6021 | 15829 | 47913 | 36258 | 16172 | 48085 | 35743 | 115.37  | 132.10  |
| 100000 | 0.96 | 0.4000 | 0.6000 | 16000 | 46080 | 36000 | 37.65    | 0.3979 | 0.4021 | 0.5979 | 0.6021 | 15829 | 47913 | 36258 | 16172 | 48085 | 35743 | 73.83   | 87.28   |
| 100000 | 0.97 | 0.4000 | 0.6000 | 16000 | 46560 | 36000 | 21.06    | 0.3979 | 0.4021 | 0.5979 | 0.6021 | 15829 | 47913 | 36258 | 16172 | 48085 | 35743 | 41.91   | 52.05   |
| 100000 | 0.98 | 0.4000 | 0.6000 | 16000 | 47040 | 36000 | 9.31     | 0.3979 | 0.4021 | 0.5979 | 0.6021 | 15829 | 47913 | 36258 | 16172 | 48085 | 35743 | 19.60   | 26.39   |
| 100000 | 0.99 | 0.4000 | 0.6000 | 16000 | 47520 | 36000 | 2.32     | 0.3979 | 0.4021 | 0.5979 | 0.6021 | 15829 | 47913 | 36258 | 16172 | 48085 | 35743 | 6.92    | 10.32   |
| 100000 | 1.00 | 0.4000 | 0.6000 | 16000 | 48000 | 36000 | 0.00     | 0.3979 | 0.4021 | 0.5979 | 0.6021 | 15829 | 47913 | 36258 | 16172 | 48085 | 35743 | 3.85    | 3.83    |
| 100000 | 1.01 | 0.4000 | 0.6000 | 16000 | 48480 | 36000 | 2.29     | 0.3979 | 0.4021 | 0.5979 | 0.6021 | 15829 | 47913 | 36258 | 16172 | 48085 | 35743 | 10.40   | 6.93    |
| 100000 | 1.02 | 0.4000 | 0.6000 | 16000 | 48960 | 36000 | 9.12     | 0.3979 | 0.4021 | 0.5979 | 0.6021 | 15829 | 47913 | 36258 | 16172 | 48085 | 35743 | 26.56   | 19.61   |
| 100000 | 1.03 | 0.4000 | 0.6000 | 16000 | 49440 | 36000 | 20.42    | 0.3979 | 0.4021 | 0.5979 | 0.6021 | 15829 | 47913 | 36258 | 16172 | 48085 | 35743 | 52.34   | 41.87   |
| 100000 | 1.04 | 0.4000 | 0.6000 | 16000 | 49920 | 36000 | 36.11    | 0.3979 | 0.4021 | 0.5979 | 0.6021 | 15829 | 47913 | 36258 | 16172 | 48085 | 35743 | 87.74   | 73.71   |
| 100000 | 1.05 | 0.4000 | 0.6000 | 16000 | 50400 | 36000 | 56.14    | 0.3979 | 0.4021 | 0.5979 | 0.6021 | 15829 | 47913 | 36258 | 16172 | 48085 | 35743 | 132.76  | 115.14  |
| 100000 | 1.06 | 0.4000 | 0.6000 | 16000 | 50880 | 36000 | 80.44    | 0.3979 | 0.4021 | 0.5979 | 0.6021 | 15829 | 47913 | 36258 | 16172 | 48085 | 35743 | 187.40  | 166.15  |
| 100000 | 1.07 | 0.4000 | 0.6000 | 16000 | 51360 | 36000 | 108.94   | 0.3979 | 0.4021 | 0.5979 | 0.6021 | 15829 | 47913 | 36258 | 16172 | 48085 | 35743 | 251.65  | 226.75  |
| 100000 | 1.08 | 0.4000 | 0.6000 | 16000 | 51840 | 36000 | 141.58   | 0.3979 | 0.4021 | 0.5979 | 0.6021 | 15829 | 47913 | 36258 | 16172 | 48085 | 35743 | 325.52  | 296.92  |
| 100000 | 1.09 | 0.4000 | 0.6000 | 16000 | 52320 | 36000 | 178.31   | 0.3979 | 0.4021 | 0.5979 | 0.6021 | 15829 | 47913 | 36258 | 16172 | 48085 | 35743 | 409.01  | 376.68  |

|        |      |        |        |       |       |       |          |        |        |        |        |       |       |       |       |       |       |         |         |
|--------|------|--------|--------|-------|-------|-------|----------|--------|--------|--------|--------|-------|-------|-------|-------|-------|-------|---------|---------|
| 100000 | 1.10 | 0.4000 | 0.6000 | 16000 | 52800 | 36000 | 219.05   | 0.3979 | 0.4021 | 0.5979 | 0.6021 | 15829 | 47913 | 36258 | 16172 | 48085 | 35743 | 502.11  | 466.02  |
| 100000 | 1.11 | 0.4000 | 0.6000 | 16000 | 53280 | 36000 | 263.76   | 0.3979 | 0.4021 | 0.5979 | 0.6021 | 15829 | 47913 | 36258 | 16172 | 48085 | 35743 | 604.83  | 564.95  |
| 100000 | 1.12 | 0.4000 | 0.6000 | 16000 | 53760 | 36000 | 312.37   | 0.3979 | 0.4021 | 0.5979 | 0.6021 | 15829 | 47913 | 36258 | 16172 | 48085 | 35743 | 717.17  | 673.46  |
| 100000 | 1.13 | 0.4000 | 0.6000 | 16000 | 54240 | 36000 | 364.83   | 0.3979 | 0.4021 | 0.5979 | 0.6021 | 15829 | 47913 | 36258 | 16172 | 48085 | 35743 | 839.13  | 791.55  |
| 100000 | 1.14 | 0.4000 | 0.6000 | 16000 | 54720 | 36000 | 421.08   | 0.3979 | 0.4021 | 0.5979 | 0.6021 | 15829 | 47913 | 36258 | 16172 | 48085 | 35743 | 970.70  | 919.23  |
| 100000 | 1.15 | 0.4000 | 0.6000 | 16000 | 55200 | 36000 | 481.07   | 0.3979 | 0.4021 | 0.5979 | 0.6021 | 15829 | 47913 | 36258 | 16172 | 48085 | 35743 | 1111.89 | 1056.48 |
| 100000 | 1.16 | 0.4000 | 0.6000 | 16000 | 55680 | 36000 | 544.75   | 0.3979 | 0.4021 | 0.5979 | 0.6021 | 15829 | 47913 | 36258 | 16172 | 48085 | 35743 | 1262.70 | 1203.32 |
| 100000 | 1.17 | 0.4000 | 0.6000 | 16000 | 56160 | 36000 | 612.07   | 0.3979 | 0.4021 | 0.5979 | 0.6021 | 15829 | 47913 | 36258 | 16172 | 48085 | 35743 | 1423.13 | 1359.75 |
| 100000 | 1.18 | 0.4000 | 0.6000 | 16000 | 56640 | 36000 | 682.97   | 0.3979 | 0.4021 | 0.5979 | 0.6021 | 15829 | 47913 | 36258 | 16172 | 48085 | 35743 | 1593.17 | 1525.76 |
| 100000 | 1.19 | 0.4000 | 0.6000 | 16000 | 57120 | 36000 | 757.40   | 0.3979 | 0.4021 | 0.5979 | 0.6021 | 15829 | 47913 | 36258 | 16172 | 48085 | 35743 | 1772.83 | 1701.35 |
| 100000 | 1.20 | 0.4000 | 0.6000 | 16000 | 57600 | 36000 | 835.32   | 0.3979 | 0.4021 | 0.5979 | 0.6021 | 15829 | 47913 | 36258 | 16172 | 48085 | 35743 | 1962.11 | 1886.52 |
| 100000 | 0.80 | 0.4500 | 0.5500 | 20250 | 39600 | 30250 | 1,090.48 | 0.4478 | 0.4522 | 0.5478 | 0.5522 | 20054 | 49455 | 30490 | 20447 | 49543 | 30011 | 1967.79 | 1999.18 |
| 100000 | 0.81 | 0.4500 | 0.5500 | 20250 | 40095 | 30250 | 978.63   | 0.4478 | 0.4522 | 0.5478 | 0.5522 | 20054 | 49455 | 30490 | 20447 | 49543 | 30011 | 1775.46 | 1805.45 |
| 100000 | 0.82 | 0.4500 | 0.5500 | 20250 | 40590 | 30250 | 873.43   | 0.4478 | 0.4522 | 0.5478 | 0.5522 | 20054 | 49455 | 30490 | 20447 | 49543 | 30011 | 1593.03 | 1621.60 |
| 100000 | 0.83 | 0.4500 | 0.5500 | 20250 | 41085 | 30250 | 774.76   | 0.4478 | 0.4522 | 0.5478 | 0.5522 | 20054 | 49455 | 30490 | 20447 | 49543 | 30011 | 1420.52 | 1447.65 |
| 100000 | 0.84 | 0.4500 | 0.5500 | 20250 | 41580 | 30250 | 682.50   | 0.4478 | 0.4522 | 0.5478 | 0.5522 | 20054 | 49455 | 30490 | 20447 | 49543 | 30011 | 1257.92 | 1283.59 |
| 100000 | 0.85 | 0.4500 | 0.5500 | 20250 | 42075 | 30250 | 596.57   | 0.4478 | 0.4522 | 0.5478 | 0.5522 | 20054 | 49455 | 30490 | 20447 | 49543 | 30011 | 1105.22 | 1129.42 |
| 100000 | 0.86 | 0.4500 | 0.5500 | 20250 | 42570 | 30250 | 516.84   | 0.4478 | 0.4522 | 0.5478 | 0.5522 | 20054 | 49455 | 30490 | 20447 | 49543 | 30011 | 962.43  | 985.14  |
| 100000 | 0.87 | 0.4500 | 0.5500 | 20250 | 43065 | 30250 | 443.23   | 0.4478 | 0.4522 | 0.5478 | 0.5522 | 20054 | 49455 | 30490 | 20447 | 49543 | 30011 | 829.55  | 850.75  |
| 100000 | 0.88 | 0.4500 | 0.5500 | 20250 | 43560 | 30250 | 375.63   | 0.4478 | 0.4522 | 0.5478 | 0.5522 | 20054 | 49455 | 30490 | 20447 | 49543 | 30011 | 706.58  | 726.25  |
| 100000 | 0.89 | 0.4500 | 0.5500 | 20250 | 44055 | 30250 | 313.94   | 0.4478 | 0.4522 | 0.5478 | 0.5522 | 20054 | 49455 | 30490 | 20447 | 49543 | 30011 | 593.52  | 611.65  |
| 100000 | 0.90 | 0.4500 | 0.5500 | 20250 | 44550 | 30250 | 258.07   | 0.4478 | 0.4522 | 0.5478 | 0.5522 | 20054 | 49455 | 30490 | 20447 | 49543 | 30011 | 490.37  | 506.94  |
| 100000 | 0.91 | 0.4500 | 0.5500 | 20250 | 45045 | 30250 | 207.93   | 0.4478 | 0.4522 | 0.5478 | 0.5522 | 20054 | 49455 | 30490 | 20447 | 49543 | 30011 | 397.13  | 412.11  |
| 100000 | 0.92 | 0.4500 | 0.5500 | 20250 | 45540 | 30250 | 163.42   | 0.4478 | 0.4522 | 0.5478 | 0.5522 | 20054 | 49455 | 30490 | 20447 | 49543 | 30011 | 313.79  | 327.18  |
| 100000 | 0.93 | 0.4500 | 0.5500 | 20250 | 46035 | 30250 | 124.47   | 0.4478 | 0.4522 | 0.5478 | 0.5522 | 20054 | 49455 | 30490 | 20447 | 49543 | 30011 | 240.37  | 252.15  |
| 100000 | 0.94 | 0.4500 | 0.5500 | 20250 | 46530 | 30250 | 90.97    | 0.4478 | 0.4522 | 0.5478 | 0.5522 | 20054 | 49455 | 30490 | 20447 | 49543 | 30011 | 176.85  | 187.00  |
| 100000 | 0.95 | 0.4500 | 0.5500 | 20250 | 47025 | 30250 | 62.84    | 0.4478 | 0.4522 | 0.5478 | 0.5522 | 20054 | 49455 | 30490 | 20447 | 49543 | 30011 | 123.25  | 131.74  |
| 100000 | 0.96 | 0.4500 | 0.5500 | 20250 | 47520 | 30250 | 40.01    | 0.4478 | 0.4522 | 0.5478 | 0.5522 | 20054 | 49455 | 30490 | 20447 | 49543 | 30011 | 79.55   | 86.38   |
| 100000 | 0.97 | 0.4500 | 0.5500 | 20250 | 48015 | 30250 | 22.39    | 0.4478 | 0.4522 | 0.5478 | 0.5522 | 20054 | 49455 | 30490 | 20447 | 49543 | 30011 | 45.76   | 50.91   |
| 100000 | 0.98 | 0.4500 | 0.5500 | 20250 | 48510 | 30250 | 9.90     | 0.4478 | 0.4522 | 0.5478 | 0.5522 | 20054 | 49455 | 30490 | 20447 | 49543 | 30011 | 21.88   | 25.33   |
| 100000 | 0.99 | 0.4500 | 0.5500 | 20250 | 49005 | 30250 | 2.46     | 0.4478 | 0.4522 | 0.5478 | 0.5522 | 20054 | 49455 | 30490 | 20447 | 49543 | 30011 | 7.91    | 9.64    |
| 100000 | 1.00 | 0.4500 | 0.5500 | 20250 | 49500 | 30250 | 0.00     | 0.4478 | 0.4522 | 0.5478 | 0.5522 | 20054 | 49455 | 30490 | 20447 | 49543 | 30011 | 3.85    | 3.84    |
| 100000 | 1.01 | 0.4500 | 0.5500 | 20250 | 49995 | 30250 | 2.44     | 0.4478 | 0.4522 | 0.5478 | 0.5522 | 20054 | 49455 | 30490 | 20447 | 49543 | 30011 | 9.69    | 7.93    |
| 100000 | 1.02 | 0.4500 | 0.5500 | 20250 | 50490 | 30250 | 9.70     | 0.4478 | 0.4522 | 0.5478 | 0.5522 | 20054 | 49455 | 30490 | 20447 | 49543 | 30011 | 25.45   | 21.92   |
| 100000 | 1.03 | 0.4500 | 0.5500 | 20250 | 50985 | 30250 | 21.72    | 0.4478 | 0.4522 | 0.5478 | 0.5522 | 20054 | 49455 | 30490 | 20447 | 49543 | 30011 | 51.11   | 45.79   |



|        |      |        |        |       |       |       |          |        |        |        |        |       |       |       |       |       |       |         |         |
|--------|------|--------|--------|-------|-------|-------|----------|--------|--------|--------|--------|-------|-------|-------|-------|-------|-------|---------|---------|
| 100000 | 1.04 | 0.4500 | 0.5500 | 20250 | 51480 | 30250 | 38.43    | 0.4478 | 0.4522 | 0.5478 | 0.5522 | 20054 | 49455 | 30490 | 20447 | 49543 | 30011 | 86.68   | 79.56   |
| 100000 | 1.05 | 0.4500 | 0.5500 | 20250 | 51975 | 30250 | 59.75    | 0.4478 | 0.4522 | 0.5478 | 0.5522 | 20054 | 49455 | 30490 | 20447 | 49543 | 30011 | 132.17  | 123.22  |
| 100000 | 1.06 | 0.4500 | 0.5500 | 20250 | 52470 | 30250 | 85.62    | 0.4478 | 0.4522 | 0.5478 | 0.5522 | 20054 | 49455 | 30490 | 20447 | 49543 | 30011 | 187.56  | 176.77  |
| 100000 | 1.07 | 0.4500 | 0.5500 | 20250 | 52965 | 30250 | 115.97   | 0.4478 | 0.4522 | 0.5478 | 0.5522 | 20054 | 49455 | 30490 | 20447 | 49543 | 30011 | 252.86  | 240.21  |
| 100000 | 1.08 | 0.4500 | 0.5500 | 20250 | 53460 | 30250 | 150.73   | 0.4478 | 0.4522 | 0.5478 | 0.5522 | 20054 | 49455 | 30490 | 20447 | 49543 | 30011 | 328.07  | 313.55  |
| 100000 | 1.09 | 0.4500 | 0.5500 | 20250 | 53955 | 30250 | 189.85   | 0.4478 | 0.4522 | 0.5478 | 0.5522 | 20054 | 49455 | 30490 | 20447 | 49543 | 30011 | 413.18  | 396.77  |
| 100000 | 1.10 | 0.4500 | 0.5500 | 20250 | 54450 | 30250 | 233.26   | 0.4478 | 0.4522 | 0.5478 | 0.5522 | 20054 | 49455 | 30490 | 20447 | 49543 | 30011 | 508.21  | 489.89  |
| 100000 | 1.11 | 0.4500 | 0.5500 | 20250 | 54945 | 30250 | 280.89   | 0.4478 | 0.4522 | 0.5478 | 0.5522 | 20054 | 49455 | 30490 | 20447 | 49543 | 30011 | 613.15  | 592.90  |
| 100000 | 1.12 | 0.4500 | 0.5500 | 20250 | 55440 | 30250 | 332.70   | 0.4478 | 0.4522 | 0.5478 | 0.5522 | 20054 | 49455 | 30490 | 20447 | 49543 | 30011 | 727.99  | 705.80  |
| 100000 | 1.13 | 0.4500 | 0.5500 | 20250 | 55935 | 30250 | 388.61   | 0.4478 | 0.4522 | 0.5478 | 0.5522 | 20054 | 49455 | 30490 | 20447 | 49543 | 30011 | 852.74  | 828.59  |
| 100000 | 1.14 | 0.4500 | 0.5500 | 20250 | 56430 | 30250 | 448.58   | 0.4478 | 0.4522 | 0.5478 | 0.5522 | 20054 | 49455 | 30490 | 20447 | 49543 | 30011 | 987.41  | 961.27  |
| 100000 | 1.15 | 0.4500 | 0.5500 | 20250 | 56925 | 30250 | 512.54   | 0.4478 | 0.4522 | 0.5478 | 0.5522 | 20054 | 49455 | 30490 | 20447 | 49543 | 30011 | 1131.98 | 1103.84 |
| 100000 | 1.16 | 0.4500 | 0.5500 | 20250 | 57420 | 30250 | 580.43   | 0.4478 | 0.4522 | 0.5478 | 0.5522 | 20054 | 49455 | 30490 | 20447 | 49543 | 30011 | 1286.46 | 1256.31 |
| 100000 | 1.17 | 0.4500 | 0.5500 | 20250 | 57915 | 30250 | 652.22   | 0.4478 | 0.4522 | 0.5478 | 0.5522 | 20054 | 49455 | 30490 | 20447 | 49543 | 30011 | 1450.85 | 1418.67 |
| 100000 | 1.18 | 0.4500 | 0.5500 | 20250 | 58410 | 30250 | 727.83   | 0.4478 | 0.4522 | 0.5478 | 0.5522 | 20054 | 49455 | 30490 | 20447 | 49543 | 30011 | 1625.15 | 1590.91 |
| 100000 | 1.19 | 0.4500 | 0.5500 | 20250 | 58905 | 30250 | 807.22   | 0.4478 | 0.4522 | 0.5478 | 0.5522 | 20054 | 49455 | 30490 | 20447 | 49543 | 30011 | 1809.35 | 1773.05 |
| 100000 | 1.20 | 0.4500 | 0.5500 | 20250 | 59400 | 30250 | 890.34   | 0.4478 | 0.4522 | 0.5478 | 0.5522 | 20054 | 49455 | 30490 | 20447 | 49543 | 30011 | 2003.47 | 1965.09 |
| 100000 | 0.80 | 0.5000 | 0.5000 | 25000 | 40000 | 25000 | 1,111.11 | 0.4978 | 0.5022 | 0.4978 | 0.5022 | 24781 | 49999 | 25220 | 25220 | 49999 | 24781 | 2003.50 | 2003.50 |
| 100000 | 0.81 | 0.5000 | 0.5000 | 25000 | 40500 | 25000 | 997.24   | 0.4978 | 0.5022 | 0.4978 | 0.5022 | 24781 | 49999 | 25220 | 25220 | 49999 | 24781 | 1808.51 | 1808.51 |
| 100000 | 0.82 | 0.5000 | 0.5000 | 25000 | 41000 | 25000 | 890.11   | 0.4978 | 0.5022 | 0.4978 | 0.5022 | 24781 | 49999 | 25220 | 25220 | 49999 | 24781 | 1623.53 | 1623.53 |
| 100000 | 0.83 | 0.5000 | 0.5000 | 25000 | 41500 | 25000 | 789.62   | 0.4978 | 0.5022 | 0.4978 | 0.5022 | 24781 | 49999 | 25220 | 25220 | 49999 | 24781 | 1448.54 | 1448.54 |
| 100000 | 0.84 | 0.5000 | 0.5000 | 25000 | 42000 | 25000 | 695.65   | 0.4978 | 0.5022 | 0.4978 | 0.5022 | 24781 | 49999 | 25220 | 25220 | 49999 | 24781 | 1283.56 | 1283.56 |
| 100000 | 0.85 | 0.5000 | 0.5000 | 25000 | 42500 | 25000 | 608.11   | 0.4978 | 0.5022 | 0.4978 | 0.5022 | 24781 | 49999 | 25220 | 25220 | 49999 | 24781 | 1128.58 | 1128.58 |
| 100000 | 0.86 | 0.5000 | 0.5000 | 25000 | 43000 | 25000 | 526.88   | 0.4978 | 0.5022 | 0.4978 | 0.5022 | 24781 | 49999 | 25220 | 25220 | 49999 | 24781 | 983.59  | 983.59  |
| 100000 | 0.87 | 0.5000 | 0.5000 | 25000 | 43500 | 25000 | 451.87   | 0.4978 | 0.5022 | 0.4978 | 0.5022 | 24781 | 49999 | 25220 | 25220 | 49999 | 24781 | 848.61  | 848.61  |
| 100000 | 0.88 | 0.5000 | 0.5000 | 25000 | 44000 | 25000 | 382.98   | 0.4978 | 0.5022 | 0.4978 | 0.5022 | 24781 | 49999 | 25220 | 25220 | 49999 | 24781 | 723.63  | 723.63  |
| 100000 | 0.89 | 0.5000 | 0.5000 | 25000 | 44500 | 25000 | 320.11   | 0.4978 | 0.5022 | 0.4978 | 0.5022 | 24781 | 49999 | 25220 | 25220 | 49999 | 24781 | 608.64  | 608.64  |
| 100000 | 0.90 | 0.5000 | 0.5000 | 25000 | 45000 | 25000 | 263.16   | 0.4978 | 0.5022 | 0.4978 | 0.5022 | 24781 | 49999 | 25220 | 25220 | 49999 | 24781 | 503.66  | 503.66  |
| 100000 | 0.91 | 0.5000 | 0.5000 | 25000 | 45500 | 25000 | 212.04   | 0.4978 | 0.5022 | 0.4978 | 0.5022 | 24781 | 49999 | 25220 | 25220 | 49999 | 24781 | 408.68  | 408.68  |
| 100000 | 0.92 | 0.5000 | 0.5000 | 25000 | 46000 | 25000 | 166.67   | 0.4978 | 0.5022 | 0.4978 | 0.5022 | 24781 | 49999 | 25220 | 25220 | 49999 | 24781 | 323.69  | 323.69  |
| 100000 | 0.93 | 0.5000 | 0.5000 | 25000 | 46500 | 25000 | 126.94   | 0.4978 | 0.5022 | 0.4978 | 0.5022 | 24781 | 49999 | 25220 | 25220 | 49999 | 24781 | 248.71  | 248.71  |
| 100000 | 0.94 | 0.5000 | 0.5000 | 25000 | 47000 | 25000 | 92.78    | 0.4978 | 0.5022 | 0.4978 | 0.5022 | 24781 | 49999 | 25220 | 25220 | 49999 | 24781 | 183.73  | 183.73  |
| 100000 | 0.95 | 0.5000 | 0.5000 | 25000 | 47500 | 25000 | 64.10    | 0.4978 | 0.5022 | 0.4978 | 0.5022 | 24781 | 49999 | 25220 | 25220 | 49999 | 24781 | 128.75  | 128.75  |
| 100000 | 0.96 | 0.5000 | 0.5000 | 25000 | 48000 | 25000 | 40.82    | 0.4978 | 0.5022 | 0.4978 | 0.5022 | 24781 | 49999 | 25220 | 25220 | 49999 | 24781 | 83.77   | 83.77   |
| 100000 | 0.97 | 0.5000 | 0.5000 | 25000 | 48500 | 25000 | 22.84    | 0.4978 | 0.5022 | 0.4978 | 0.5022 | 24781 | 49999 | 25220 | 25220 | 49999 | 24781 | 48.78   | 48.78   |

|        |      |        |        |       |       |       |          |        |        |        |        |       |       |       |       |       |       |         |         |
|--------|------|--------|--------|-------|-------|-------|----------|--------|--------|--------|--------|-------|-------|-------|-------|-------|-------|---------|---------|
| 100000 | 0.98 | 0.5000 | 0.5000 | 25000 | 49000 | 25000 | 10.10    | 0.4978 | 0.5022 | 0.4978 | 0.5022 | 24781 | 49999 | 25220 | 25220 | 49999 | 24781 | 23.80   | 23.80   |
| 100000 | 0.99 | 0.5000 | 0.5000 | 25000 | 49500 | 25000 | 2.51     | 0.4978 | 0.5022 | 0.4978 | 0.5022 | 24781 | 49999 | 25220 | 25220 | 49999 | 24781 | 8.82    | 8.82    |
| 100000 | 1.00 | 0.5000 | 0.5000 | 25000 | 50000 | 25000 | 0.00     | 0.4978 | 0.5022 | 0.4978 | 0.5022 | 24781 | 49999 | 25220 | 25220 | 49999 | 24781 | 3.84    | 3.84    |
| 100000 | 1.01 | 0.5000 | 0.5000 | 25000 | 50500 | 25000 | 2.49     | 0.4978 | 0.5022 | 0.4978 | 0.5022 | 24781 | 49999 | 25220 | 25220 | 49999 | 24781 | 8.86    | 8.86    |
| 100000 | 1.02 | 0.5000 | 0.5000 | 25000 | 51000 | 25000 | 9.90     | 0.4978 | 0.5022 | 0.4978 | 0.5022 | 24781 | 49999 | 25220 | 25220 | 49999 | 24781 | 23.88   | 23.88   |
| 100000 | 1.03 | 0.5000 | 0.5000 | 25000 | 51500 | 25000 | 22.17    | 0.4978 | 0.5022 | 0.4978 | 0.5022 | 24781 | 49999 | 25220 | 25220 | 49999 | 24781 | 48.90   | 48.90   |
| 100000 | 1.04 | 0.5000 | 0.5000 | 25000 | 52000 | 25000 | 39.22    | 0.4978 | 0.5022 | 0.4978 | 0.5022 | 24781 | 49999 | 25220 | 25220 | 49999 | 24781 | 83.92   | 83.92   |
| 100000 | 1.05 | 0.5000 | 0.5000 | 25000 | 52500 | 25000 | 60.98    | 0.4978 | 0.5022 | 0.4978 | 0.5022 | 24781 | 49999 | 25220 | 25220 | 49999 | 24781 | 128.94  | 128.94  |
| 100000 | 1.06 | 0.5000 | 0.5000 | 25000 | 53000 | 25000 | 87.38    | 0.4978 | 0.5022 | 0.4978 | 0.5022 | 24781 | 49999 | 25220 | 25220 | 49999 | 24781 | 183.96  | 183.96  |
| 100000 | 1.07 | 0.5000 | 0.5000 | 25000 | 53500 | 25000 | 118.36   | 0.4978 | 0.5022 | 0.4978 | 0.5022 | 24781 | 49999 | 25220 | 25220 | 49999 | 24781 | 248.98  | 248.98  |
| 100000 | 1.08 | 0.5000 | 0.5000 | 25000 | 54000 | 25000 | 153.85   | 0.4978 | 0.5022 | 0.4978 | 0.5022 | 24781 | 49999 | 25220 | 25220 | 49999 | 24781 | 324.00  | 324.00  |
| 100000 | 1.09 | 0.5000 | 0.5000 | 25000 | 54500 | 25000 | 193.78   | 0.4978 | 0.5022 | 0.4978 | 0.5022 | 24781 | 49999 | 25220 | 25220 | 49999 | 24781 | 409.02  | 409.02  |
| 100000 | 1.10 | 0.5000 | 0.5000 | 25000 | 55000 | 25000 | 238.10   | 0.4978 | 0.5022 | 0.4978 | 0.5022 | 24781 | 49999 | 25220 | 25220 | 49999 | 24781 | 504.04  | 504.04  |
| 100000 | 1.11 | 0.5000 | 0.5000 | 25000 | 55500 | 25000 | 286.73   | 0.4978 | 0.5022 | 0.4978 | 0.5022 | 24781 | 49999 | 25220 | 25220 | 49999 | 24781 | 609.06  | 609.06  |
| 100000 | 1.12 | 0.5000 | 0.5000 | 25000 | 56000 | 25000 | 339.62   | 0.4978 | 0.5022 | 0.4978 | 0.5022 | 24781 | 49999 | 25220 | 25220 | 49999 | 24781 | 724.09  | 724.09  |
| 100000 | 1.13 | 0.5000 | 0.5000 | 25000 | 56500 | 25000 | 396.71   | 0.4978 | 0.5022 | 0.4978 | 0.5022 | 24781 | 49999 | 25220 | 25220 | 49999 | 24781 | 849.11  | 849.11  |
| 100000 | 1.14 | 0.5000 | 0.5000 | 25000 | 57000 | 25000 | 457.94   | 0.4978 | 0.5022 | 0.4978 | 0.5022 | 24781 | 49999 | 25220 | 25220 | 49999 | 24781 | 984.13  | 984.13  |
| 100000 | 1.15 | 0.5000 | 0.5000 | 25000 | 57500 | 25000 | 523.26   | 0.4978 | 0.5022 | 0.4978 | 0.5022 | 24781 | 49999 | 25220 | 25220 | 49999 | 24781 | 1129.15 | 1129.15 |
| 100000 | 1.16 | 0.5000 | 0.5000 | 25000 | 58000 | 25000 | 592.59   | 0.4978 | 0.5022 | 0.4978 | 0.5022 | 24781 | 49999 | 25220 | 25220 | 49999 | 24781 | 1284.17 | 1284.17 |
| 100000 | 1.17 | 0.5000 | 0.5000 | 25000 | 58500 | 25000 | 665.90   | 0.4978 | 0.5022 | 0.4978 | 0.5022 | 24781 | 49999 | 25220 | 25220 | 49999 | 24781 | 1449.20 | 1449.20 |
| 100000 | 1.18 | 0.5000 | 0.5000 | 25000 | 59000 | 25000 | 743.12   | 0.4978 | 0.5022 | 0.4978 | 0.5022 | 24781 | 49999 | 25220 | 25220 | 49999 | 24781 | 1624.22 | 1624.22 |
| 100000 | 1.19 | 0.5000 | 0.5000 | 25000 | 59500 | 25000 | 824.20   | 0.4978 | 0.5022 | 0.4978 | 0.5022 | 24781 | 49999 | 25220 | 25220 | 49999 | 24781 | 1809.24 | 1809.24 |
| 100000 | 1.20 | 0.5000 | 0.5000 | 25000 | 60000 | 25000 | 909.09   | 0.4978 | 0.5022 | 0.4978 | 0.5022 | 24781 | 49999 | 25220 | 25220 | 49999 | 24781 | 2004.26 | 2004.26 |
| 100000 | 0.80 | 0.5500 | 0.4500 | 30250 | 39600 | 20250 | 1,090.48 | 0.5478 | 0.5522 | 0.4478 | 0.4522 | 30011 | 49543 | 20447 | 30490 | 49455 | 20054 | 1999.18 | 1967.79 |
| 100000 | 0.81 | 0.5500 | 0.4500 | 30250 | 40095 | 20250 | 978.63   | 0.5478 | 0.5522 | 0.4478 | 0.4522 | 30011 | 49543 | 20447 | 30490 | 49455 | 20054 | 1805.45 | 1775.46 |
| 100000 | 0.82 | 0.5500 | 0.4500 | 30250 | 40590 | 20250 | 873.43   | 0.5478 | 0.5522 | 0.4478 | 0.4522 | 30011 | 49543 | 20447 | 30490 | 49455 | 20054 | 1621.60 | 1593.03 |
| 100000 | 0.83 | 0.5500 | 0.4500 | 30250 | 41085 | 20250 | 774.76   | 0.5478 | 0.5522 | 0.4478 | 0.4522 | 30011 | 49543 | 20447 | 30490 | 49455 | 20054 | 1447.65 | 1420.52 |
| 100000 | 0.84 | 0.5500 | 0.4500 | 30250 | 41580 | 20250 | 682.50   | 0.5478 | 0.5522 | 0.4478 | 0.4522 | 30011 | 49543 | 20447 | 30490 | 49455 | 20054 | 1283.59 | 1257.92 |
| 100000 | 0.85 | 0.5500 | 0.4500 | 30250 | 42075 | 20250 | 596.57   | 0.5478 | 0.5522 | 0.4478 | 0.4522 | 30011 | 49543 | 20447 | 30490 | 49455 | 20054 | 1129.42 | 1105.22 |
| 100000 | 0.86 | 0.5500 | 0.4500 | 30250 | 42570 | 20250 | 516.84   | 0.5478 | 0.5522 | 0.4478 | 0.4522 | 30011 | 49543 | 20447 | 30490 | 49455 | 20054 | 985.14  | 962.43  |
| 100000 | 0.87 | 0.5500 | 0.4500 | 30250 | 43065 | 20250 | 443.23   | 0.5478 | 0.5522 | 0.4478 | 0.4522 | 30011 | 49543 | 20447 | 30490 | 49455 | 20054 | 850.75  | 829.55  |
| 100000 | 0.88 | 0.5500 | 0.4500 | 30250 | 43560 | 20250 | 375.63   | 0.5478 | 0.5522 | 0.4478 | 0.4522 | 30011 | 49543 | 20447 | 30490 | 49455 | 20054 | 726.25  | 706.58  |
| 100000 | 0.89 | 0.5500 | 0.4500 | 30250 | 44055 | 20250 | 313.94   | 0.5478 | 0.5522 | 0.4478 | 0.4522 | 30011 | 49543 | 20447 | 30490 | 49455 | 20054 | 611.65  | 593.52  |
| 100000 | 0.90 | 0.5500 | 0.4500 | 30250 | 44550 | 20250 | 258.07   | 0.5478 | 0.5522 | 0.4478 | 0.4522 | 30011 | 49543 | 20447 | 30490 | 49455 | 20054 | 506.94  | 490.37  |
| 100000 | 0.91 | 0.5500 | 0.4500 | 30250 | 45045 | 20250 | 207.93   | 0.5478 | 0.5522 | 0.4478 | 0.4522 | 30011 | 49543 | 20447 | 30490 | 49455 | 20054 | 412.11  | 397.13  |

|        |      |        |        |       |       |       |          |        |        |        |        |       |       |       |       |       |       |         |         |
|--------|------|--------|--------|-------|-------|-------|----------|--------|--------|--------|--------|-------|-------|-------|-------|-------|-------|---------|---------|
| 100000 | 0.92 | 0.5500 | 0.4500 | 30250 | 45540 | 20250 | 163.42   | 0.5478 | 0.5522 | 0.4478 | 0.4522 | 30011 | 49543 | 20447 | 30490 | 49455 | 20054 | 327.18  | 313.79  |
| 100000 | 0.93 | 0.5500 | 0.4500 | 30250 | 46035 | 20250 | 124.47   | 0.5478 | 0.5522 | 0.4478 | 0.4522 | 30011 | 49543 | 20447 | 30490 | 49455 | 20054 | 252.15  | 240.37  |
| 100000 | 0.94 | 0.5500 | 0.4500 | 30250 | 46530 | 20250 | 90.97    | 0.5478 | 0.5522 | 0.4478 | 0.4522 | 30011 | 49543 | 20447 | 30490 | 49455 | 20054 | 187.00  | 176.85  |
| 100000 | 0.95 | 0.5500 | 0.4500 | 30250 | 47025 | 20250 | 62.84    | 0.5478 | 0.5522 | 0.4478 | 0.4522 | 30011 | 49543 | 20447 | 30490 | 49455 | 20054 | 131.74  | 123.25  |
| 100000 | 0.96 | 0.5500 | 0.4500 | 30250 | 47520 | 20250 | 40.01    | 0.5478 | 0.5522 | 0.4478 | 0.4522 | 30011 | 49543 | 20447 | 30490 | 49455 | 20054 | 86.38   | 79.55   |
| 100000 | 0.97 | 0.5500 | 0.4500 | 30250 | 48015 | 20250 | 22.39    | 0.5478 | 0.5522 | 0.4478 | 0.4522 | 30011 | 49543 | 20447 | 30490 | 49455 | 20054 | 50.91   | 45.76   |
| 100000 | 0.98 | 0.5500 | 0.4500 | 30250 | 48510 | 20250 | 9.90     | 0.5478 | 0.5522 | 0.4478 | 0.4522 | 30011 | 49543 | 20447 | 30490 | 49455 | 20054 | 25.33   | 21.88   |
| 100000 | 0.99 | 0.5500 | 0.4500 | 30250 | 49005 | 20250 | 2.46     | 0.5478 | 0.5522 | 0.4478 | 0.4522 | 30011 | 49543 | 20447 | 30490 | 49455 | 20054 | 9.64    | 7.91    |
| 100000 | 1.00 | 0.5500 | 0.4500 | 30250 | 49500 | 20250 | 0.00     | 0.5478 | 0.5522 | 0.4478 | 0.4522 | 30011 | 49543 | 20447 | 30490 | 49455 | 20054 | 3.84    | 3.85    |
| 100000 | 1.01 | 0.5500 | 0.4500 | 30250 | 49995 | 20250 | 2.44     | 0.5478 | 0.5522 | 0.4478 | 0.4522 | 30011 | 49543 | 20447 | 30490 | 49455 | 20054 | 7.93    | 9.69    |
| 100000 | 1.02 | 0.5500 | 0.4500 | 30250 | 50490 | 20250 | 9.70     | 0.5478 | 0.5522 | 0.4478 | 0.4522 | 30011 | 49543 | 20447 | 30490 | 49455 | 20054 | 21.92   | 25.45   |
| 100000 | 1.03 | 0.5500 | 0.4500 | 30250 | 50985 | 20250 | 21.72    | 0.5478 | 0.5522 | 0.4478 | 0.4522 | 30011 | 49543 | 20447 | 30490 | 49455 | 20054 | 45.79   | 51.11   |
| 100000 | 1.04 | 0.5500 | 0.4500 | 30250 | 51480 | 20250 | 38.43    | 0.5478 | 0.5522 | 0.4478 | 0.4522 | 30011 | 49543 | 20447 | 30490 | 49455 | 20054 | 79.56   | 86.68   |
| 100000 | 1.05 | 0.5500 | 0.4500 | 30250 | 51975 | 20250 | 59.75    | 0.5478 | 0.5522 | 0.4478 | 0.4522 | 30011 | 49543 | 20447 | 30490 | 49455 | 20054 | 123.22  | 132.17  |
| 100000 | 1.06 | 0.5500 | 0.4500 | 30250 | 52470 | 20250 | 85.62    | 0.5478 | 0.5522 | 0.4478 | 0.4522 | 30011 | 49543 | 20447 | 30490 | 49455 | 20054 | 176.77  | 187.56  |
| 100000 | 1.07 | 0.5500 | 0.4500 | 30250 | 52965 | 20250 | 115.97   | 0.5478 | 0.5522 | 0.4478 | 0.4522 | 30011 | 49543 | 20447 | 30490 | 49455 | 20054 | 240.21  | 252.86  |
| 100000 | 1.08 | 0.5500 | 0.4500 | 30250 | 53460 | 20250 | 150.73   | 0.5478 | 0.5522 | 0.4478 | 0.4522 | 30011 | 49543 | 20447 | 30490 | 49455 | 20054 | 313.55  | 328.07  |
| 100000 | 1.09 | 0.5500 | 0.4500 | 30250 | 53955 | 20250 | 189.85   | 0.5478 | 0.5522 | 0.4478 | 0.4522 | 30011 | 49543 | 20447 | 30490 | 49455 | 20054 | 396.77  | 413.18  |
| 100000 | 1.10 | 0.5500 | 0.4500 | 30250 | 54450 | 20250 | 233.26   | 0.5478 | 0.5522 | 0.4478 | 0.4522 | 30011 | 49543 | 20447 | 30490 | 49455 | 20054 | 489.89  | 508.21  |
| 100000 | 1.11 | 0.5500 | 0.4500 | 30250 | 54945 | 20250 | 280.89   | 0.5478 | 0.5522 | 0.4478 | 0.4522 | 30011 | 49543 | 20447 | 30490 | 49455 | 20054 | 592.90  | 613.15  |
| 100000 | 1.12 | 0.5500 | 0.4500 | 30250 | 55440 | 20250 | 332.70   | 0.5478 | 0.5522 | 0.4478 | 0.4522 | 30011 | 49543 | 20447 | 30490 | 49455 | 20054 | 705.80  | 727.99  |
| 100000 | 1.13 | 0.5500 | 0.4500 | 30250 | 55935 | 20250 | 388.61   | 0.5478 | 0.5522 | 0.4478 | 0.4522 | 30011 | 49543 | 20447 | 30490 | 49455 | 20054 | 828.59  | 852.74  |
| 100000 | 1.14 | 0.5500 | 0.4500 | 30250 | 56430 | 20250 | 448.58   | 0.5478 | 0.5522 | 0.4478 | 0.4522 | 30011 | 49543 | 20447 | 30490 | 49455 | 20054 | 961.27  | 987.41  |
| 100000 | 1.15 | 0.5500 | 0.4500 | 30250 | 56925 | 20250 | 512.54   | 0.5478 | 0.5522 | 0.4478 | 0.4522 | 30011 | 49543 | 20447 | 30490 | 49455 | 20054 | 1103.84 | 1131.98 |
| 100000 | 1.16 | 0.5500 | 0.4500 | 30250 | 57420 | 20250 | 580.43   | 0.5478 | 0.5522 | 0.4478 | 0.4522 | 30011 | 49543 | 20447 | 30490 | 49455 | 20054 | 1256.31 | 1286.46 |
| 100000 | 1.17 | 0.5500 | 0.4500 | 30250 | 57915 | 20250 | 652.22   | 0.5478 | 0.5522 | 0.4478 | 0.4522 | 30011 | 49543 | 20447 | 30490 | 49455 | 20054 | 1418.67 | 1450.85 |
| 100000 | 1.18 | 0.5500 | 0.4500 | 30250 | 58410 | 20250 | 727.83   | 0.5478 | 0.5522 | 0.4478 | 0.4522 | 30011 | 49543 | 20447 | 30490 | 49455 | 20054 | 1590.91 | 1625.15 |
| 100000 | 1.19 | 0.5500 | 0.4500 | 30250 | 58905 | 20250 | 807.22   | 0.5478 | 0.5522 | 0.4478 | 0.4522 | 30011 | 49543 | 20447 | 30490 | 49455 | 20054 | 1773.05 | 1809.35 |
| 100000 | 1.20 | 0.5500 | 0.4500 | 30250 | 59400 | 20250 | 890.34   | 0.5478 | 0.5522 | 0.4478 | 0.4522 | 30011 | 49543 | 20447 | 30490 | 49455 | 20054 | 1965.09 | 2003.47 |
| 100000 | 0.80 | 0.6000 | 0.4000 | 36000 | 38400 | 16000 | 1,029.57 | 0.5979 | 0.6021 | 0.3979 | 0.4021 | 35743 | 48085 | 16172 | 36258 | 47913 | 15829 | 1954.37 | 1892.54 |
| 100000 | 0.81 | 0.6000 | 0.4000 | 36000 | 38880 | 16000 | 923.73   | 0.5979 | 0.6021 | 0.3979 | 0.4021 | 35743 | 48085 | 16172 | 36258 | 47913 | 15829 | 1765.80 | 1706.74 |
| 100000 | 0.82 | 0.6000 | 0.4000 | 36000 | 39360 | 16000 | 824.22   | 0.5979 | 0.6021 | 0.3979 | 0.4021 | 35743 | 48085 | 16172 | 36258 | 47913 | 15829 | 1586.82 | 1530.56 |
| 100000 | 0.83 | 0.6000 | 0.4000 | 36000 | 39840 | 16000 | 730.92   | 0.5979 | 0.6021 | 0.3979 | 0.4021 | 35743 | 48085 | 16172 | 36258 | 47913 | 15829 | 1417.42 | 1363.99 |
| 100000 | 0.84 | 0.6000 | 0.4000 | 36000 | 40320 | 16000 | 643.73   | 0.5979 | 0.6021 | 0.3979 | 0.4021 | 35743 | 48085 | 16172 | 36258 | 47913 | 15829 | 1257.60 | 1207.05 |
| 100000 | 0.85 | 0.6000 | 0.4000 | 36000 | 40800 | 16000 | 562.55   | 0.5979 | 0.6021 | 0.3979 | 0.4021 | 35743 | 48085 | 16172 | 36258 | 47913 | 15829 | 1107.37 | 1059.72 |

|        |      |        |        |       |       |       |        |        |        |        |        |       |       |       |       |       |       |         |         |
|--------|------|--------|--------|-------|-------|-------|--------|--------|--------|--------|--------|-------|-------|-------|-------|-------|-------|---------|---------|
| 100000 | 0.86 | 0.6000 | 0.4000 | 36000 | 41280 | 16000 | 487.26 | 0.5979 | 0.6021 | 0.3979 | 0.4021 | 35743 | 48085 | 16172 | 36258 | 47913 | 15829 | 966.72  | 922.00  |
| 100000 | 0.87 | 0.6000 | 0.4000 | 36000 | 41760 | 16000 | 417.76 | 0.5979 | 0.6021 | 0.3979 | 0.4021 | 35743 | 48085 | 16172 | 36258 | 47913 | 15829 | 835.65  | 793.91  |
| 100000 | 0.88 | 0.6000 | 0.4000 | 36000 | 42240 | 16000 | 353.97 | 0.5979 | 0.6021 | 0.3979 | 0.4021 | 35743 | 48085 | 16172 | 36258 | 47913 | 15829 | 714.17  | 675.43  |
| 100000 | 0.89 | 0.6000 | 0.4000 | 36000 | 42720 | 16000 | 295.78 | 0.5979 | 0.6021 | 0.3979 | 0.4021 | 35743 | 48085 | 16172 | 36258 | 47913 | 15829 | 602.27  | 566.57  |
| 100000 | 0.90 | 0.6000 | 0.4000 | 36000 | 43200 | 16000 | 243.09 | 0.5979 | 0.6021 | 0.3979 | 0.4021 | 35743 | 48085 | 16172 | 36258 | 47913 | 15829 | 499.95  | 467.33  |
| 100000 | 0.91 | 0.6000 | 0.4000 | 36000 | 43680 | 16000 | 195.82 | 0.5979 | 0.6021 | 0.3979 | 0.4021 | 35743 | 48085 | 16172 | 36258 | 47913 | 15829 | 407.21  | 377.70  |
| 100000 | 0.92 | 0.6000 | 0.4000 | 36000 | 44160 | 16000 | 153.88 | 0.5979 | 0.6021 | 0.3979 | 0.4021 | 35743 | 48085 | 16172 | 36258 | 47913 | 15829 | 324.06  | 297.69  |
| 100000 | 0.93 | 0.6000 | 0.4000 | 36000 | 44640 | 16000 | 117.17 | 0.5979 | 0.6021 | 0.3979 | 0.4021 | 35743 | 48085 | 16172 | 36258 | 47913 | 15829 | 250.49  | 227.30  |
| 100000 | 0.94 | 0.6000 | 0.4000 | 36000 | 45120 | 16000 | 85.62  | 0.5979 | 0.6021 | 0.3979 | 0.4021 | 35743 | 48085 | 16172 | 36258 | 47913 | 15829 | 186.51  | 166.53  |
| 100000 | 0.95 | 0.6000 | 0.4000 | 36000 | 45600 | 16000 | 59.14  | 0.5979 | 0.6021 | 0.3979 | 0.4021 | 35743 | 48085 | 16172 | 36258 | 47913 | 15829 | 132.10  | 115.37  |
| 100000 | 0.96 | 0.6000 | 0.4000 | 36000 | 46080 | 16000 | 37.65  | 0.5979 | 0.6021 | 0.3979 | 0.4021 | 35743 | 48085 | 16172 | 36258 | 47913 | 15829 | 87.28   | 73.83   |
| 100000 | 0.97 | 0.6000 | 0.4000 | 36000 | 46560 | 16000 | 21.06  | 0.5979 | 0.6021 | 0.3979 | 0.4021 | 35743 | 48085 | 16172 | 36258 | 47913 | 15829 | 52.05   | 41.91   |
| 100000 | 0.98 | 0.6000 | 0.4000 | 36000 | 47040 | 16000 | 9.31   | 0.5979 | 0.6021 | 0.3979 | 0.4021 | 35743 | 48085 | 16172 | 36258 | 47913 | 15829 | 26.39   | 19.60   |
| 100000 | 0.99 | 0.6000 | 0.4000 | 36000 | 47520 | 16000 | 2.32   | 0.5979 | 0.6021 | 0.3979 | 0.4021 | 35743 | 48085 | 16172 | 36258 | 47913 | 15829 | 10.32   | 6.92    |
| 100000 | 1.00 | 0.6000 | 0.4000 | 36000 | 48000 | 16000 | 0.00   | 0.5979 | 0.6021 | 0.3979 | 0.4021 | 35743 | 48085 | 16172 | 36258 | 47913 | 15829 | 3.83    | 3.85    |
| 100000 | 1.01 | 0.6000 | 0.4000 | 36000 | 48480 | 16000 | 2.29   | 0.5979 | 0.6021 | 0.3979 | 0.4021 | 35743 | 48085 | 16172 | 36258 | 47913 | 15829 | 6.93    | 10.40   |
| 100000 | 1.02 | 0.6000 | 0.4000 | 36000 | 48960 | 16000 | 9.12   | 0.5979 | 0.6021 | 0.3979 | 0.4021 | 35743 | 48085 | 16172 | 36258 | 47913 | 15829 | 19.61   | 26.56   |
| 100000 | 1.03 | 0.6000 | 0.4000 | 36000 | 49440 | 16000 | 20.42  | 0.5979 | 0.6021 | 0.3979 | 0.4021 | 35743 | 48085 | 16172 | 36258 | 47913 | 15829 | 41.87   | 52.34   |
| 100000 | 1.04 | 0.6000 | 0.4000 | 36000 | 49920 | 16000 | 36.11  | 0.5979 | 0.6021 | 0.3979 | 0.4021 | 35743 | 48085 | 16172 | 36258 | 47913 | 15829 | 73.71   | 87.74   |
| 100000 | 1.05 | 0.6000 | 0.4000 | 36000 | 50400 | 16000 | 56.14  | 0.5979 | 0.6021 | 0.3979 | 0.4021 | 35743 | 48085 | 16172 | 36258 | 47913 | 15829 | 115.14  | 132.76  |
| 100000 | 1.06 | 0.6000 | 0.4000 | 36000 | 50880 | 16000 | 80.44  | 0.5979 | 0.6021 | 0.3979 | 0.4021 | 35743 | 48085 | 16172 | 36258 | 47913 | 15829 | 166.15  | 187.40  |
| 100000 | 1.07 | 0.6000 | 0.4000 | 36000 | 51360 | 16000 | 108.94 | 0.5979 | 0.6021 | 0.3979 | 0.4021 | 35743 | 48085 | 16172 | 36258 | 47913 | 15829 | 226.75  | 251.65  |
| 100000 | 1.08 | 0.6000 | 0.4000 | 36000 | 51840 | 16000 | 141.58 | 0.5979 | 0.6021 | 0.3979 | 0.4021 | 35743 | 48085 | 16172 | 36258 | 47913 | 15829 | 296.92  | 325.52  |
| 100000 | 1.09 | 0.6000 | 0.4000 | 36000 | 52320 | 16000 | 178.31 | 0.5979 | 0.6021 | 0.3979 | 0.4021 | 35743 | 48085 | 16172 | 36258 | 47913 | 15829 | 376.68  | 409.01  |
| 100000 | 1.10 | 0.6000 | 0.4000 | 36000 | 52800 | 16000 | 219.05 | 0.5979 | 0.6021 | 0.3979 | 0.4021 | 35743 | 48085 | 16172 | 36258 | 47913 | 15829 | 466.02  | 502.11  |
| 100000 | 1.11 | 0.6000 | 0.4000 | 36000 | 53280 | 16000 | 263.76 | 0.5979 | 0.6021 | 0.3979 | 0.4021 | 35743 | 48085 | 16172 | 36258 | 47913 | 15829 | 564.95  | 604.83  |
| 100000 | 1.12 | 0.6000 | 0.4000 | 36000 | 53760 | 16000 | 312.37 | 0.5979 | 0.6021 | 0.3979 | 0.4021 | 35743 | 48085 | 16172 | 36258 | 47913 | 15829 | 673.46  | 717.17  |
| 100000 | 1.13 | 0.6000 | 0.4000 | 36000 | 54240 | 16000 | 364.83 | 0.5979 | 0.6021 | 0.3979 | 0.4021 | 35743 | 48085 | 16172 | 36258 | 47913 | 15829 | 791.55  | 839.13  |
| 100000 | 1.14 | 0.6000 | 0.4000 | 36000 | 54720 | 16000 | 421.08 | 0.5979 | 0.6021 | 0.3979 | 0.4021 | 35743 | 48085 | 16172 | 36258 | 47913 | 15829 | 919.23  | 970.70  |
| 100000 | 1.15 | 0.6000 | 0.4000 | 36000 | 55200 | 16000 | 481.07 | 0.5979 | 0.6021 | 0.3979 | 0.4021 | 35743 | 48085 | 16172 | 36258 | 47913 | 15829 | 1056.48 | 1111.89 |
| 100000 | 1.16 | 0.6000 | 0.4000 | 36000 | 55680 | 16000 | 544.75 | 0.5979 | 0.6021 | 0.3979 | 0.4021 | 35743 | 48085 | 16172 | 36258 | 47913 | 15829 | 1203.32 | 1262.70 |
| 100000 | 1.17 | 0.6000 | 0.4000 | 36000 | 56160 | 16000 | 612.07 | 0.5979 | 0.6021 | 0.3979 | 0.4021 | 35743 | 48085 | 16172 | 36258 | 47913 | 15829 | 1359.75 | 1423.13 |
| 100000 | 1.18 | 0.6000 | 0.4000 | 36000 | 56640 | 16000 | 682.97 | 0.5979 | 0.6021 | 0.3979 | 0.4021 | 35743 | 48085 | 16172 | 36258 | 47913 | 15829 | 1525.76 | 1593.17 |
| 100000 | 1.19 | 0.6000 | 0.4000 | 36000 | 57120 | 16000 | 757.40 | 0.5979 | 0.6021 | 0.3979 | 0.4021 | 35743 | 48085 | 16172 | 36258 | 47913 | 15829 | 1701.35 | 1772.83 |
| 100000 | 1.20 | 0.6000 | 0.4000 | 36000 | 57600 | 16000 | 835.32 | 0.5979 | 0.6021 | 0.3979 | 0.4021 | 35743 | 48085 | 16172 | 36258 | 47913 | 15829 | 1886.52 | 1962.11 |

|        |      |        |        |       |       |       |        |        |        |        |        |       |       |       |       |       |       |         |         |
|--------|------|--------|--------|-------|-------|-------|--------|--------|--------|--------|--------|-------|-------|-------|-------|-------|-------|---------|---------|
| 100000 | 0.80 | 0.6500 | 0.3500 | 42250 | 36400 | 12250 | 931.38 | 0.6479 | 0.6521 | 0.3479 | 0.3521 | 41979 | 45625 | 12397 | 42522 | 45374 | 12104 | 1868.55 | 1778.26 |
| 100000 | 0.81 | 0.6500 | 0.3500 | 42250 | 36855 | 12250 | 835.27 | 0.6479 | 0.6521 | 0.3479 | 0.3521 | 41979 | 45625 | 12397 | 42522 | 45374 | 12104 | 1689.10 | 1602.85 |
| 100000 | 0.82 | 0.6500 | 0.3500 | 42250 | 37310 | 12250 | 744.97 | 0.6479 | 0.6521 | 0.3479 | 0.3521 | 41979 | 45625 | 12397 | 42522 | 45374 | 12104 | 1518.72 | 1436.56 |
| 100000 | 0.83 | 0.6500 | 0.3500 | 42250 | 37765 | 12250 | 660.37 | 0.6479 | 0.6521 | 0.3479 | 0.3521 | 41979 | 45625 | 12397 | 42522 | 45374 | 12104 | 1357.42 | 1279.40 |
| 100000 | 0.84 | 0.6500 | 0.3500 | 42250 | 38220 | 12250 | 581.37 | 0.6479 | 0.6521 | 0.3479 | 0.3521 | 41979 | 45625 | 12397 | 42522 | 45374 | 12104 | 1205.20 | 1131.37 |
| 100000 | 0.85 | 0.6500 | 0.3500 | 42250 | 38675 | 12250 | 507.85 | 0.6479 | 0.6521 | 0.3479 | 0.3521 | 41979 | 45625 | 12397 | 42522 | 45374 | 12104 | 1062.05 | 992.46  |
| 100000 | 0.86 | 0.6500 | 0.3500 | 42250 | 39130 | 12250 | 439.71 | 0.6479 | 0.6521 | 0.3479 | 0.3521 | 41979 | 45625 | 12397 | 42522 | 45374 | 12104 | 927.98  | 862.67  |
| 100000 | 0.87 | 0.6500 | 0.3500 | 42250 | 39585 | 12250 | 376.86 | 0.6479 | 0.6521 | 0.3479 | 0.3521 | 41979 | 45625 | 12397 | 42522 | 45374 | 12104 | 802.98  | 742.01  |
| 100000 | 0.88 | 0.6500 | 0.3500 | 42250 | 40040 | 12250 | 319.20 | 0.6479 | 0.6521 | 0.3479 | 0.3521 | 41979 | 45625 | 12397 | 42522 | 45374 | 12104 | 687.05  | 630.48  |
| 100000 | 0.89 | 0.6500 | 0.3500 | 42250 | 40495 | 12250 | 266.63 | 0.6479 | 0.6521 | 0.3479 | 0.3521 | 41979 | 45625 | 12397 | 42522 | 45374 | 12104 | 580.20  | 528.07  |
| 100000 | 0.90 | 0.6500 | 0.3500 | 42250 | 40950 | 12250 | 219.06 | 0.6479 | 0.6521 | 0.3479 | 0.3521 | 41979 | 45625 | 12397 | 42522 | 45374 | 12104 | 482.43  | 434.79  |
| 100000 | 0.91 | 0.6500 | 0.3500 | 42250 | 41405 | 12250 | 176.41 | 0.6479 | 0.6521 | 0.3479 | 0.3521 | 41979 | 45625 | 12397 | 42522 | 45374 | 12104 | 393.73  | 350.63  |
| 100000 | 0.92 | 0.6500 | 0.3500 | 42250 | 41860 | 12250 | 138.58 | 0.6479 | 0.6521 | 0.3479 | 0.3521 | 41979 | 45625 | 12397 | 42522 | 45374 | 12104 | 314.11  | 275.60  |
| 100000 | 0.93 | 0.6500 | 0.3500 | 42250 | 42315 | 12250 | 105.49 | 0.6479 | 0.6521 | 0.3479 | 0.3521 | 41979 | 45625 | 12397 | 42522 | 45374 | 12104 | 243.56  | 209.69  |
| 100000 | 0.94 | 0.6500 | 0.3500 | 42250 | 42770 | 12250 | 77.06  | 0.6479 | 0.6521 | 0.3479 | 0.3521 | 41979 | 45625 | 12397 | 42522 | 45374 | 12104 | 182.09  | 152.91  |
| 100000 | 0.95 | 0.6500 | 0.3500 | 42250 | 43225 | 12250 | 53.21  | 0.6479 | 0.6521 | 0.3479 | 0.3521 | 41979 | 45625 | 12397 | 42522 | 45374 | 12104 | 129.69  | 105.25  |
| 100000 | 0.96 | 0.6500 | 0.3500 | 42250 | 43680 | 12250 | 33.86  | 0.6479 | 0.6521 | 0.3479 | 0.3521 | 41979 | 45625 | 12397 | 42522 | 45374 | 12104 | 86.37   | 66.72   |
| 100000 | 0.97 | 0.6500 | 0.3500 | 42250 | 44135 | 12250 | 18.94  | 0.6479 | 0.6521 | 0.3479 | 0.3521 | 41979 | 45625 | 12397 | 42522 | 45374 | 12104 | 52.12   | 37.32   |
| 100000 | 0.98 | 0.6500 | 0.3500 | 42250 | 44590 | 12250 | 8.37   | 0.6479 | 0.6521 | 0.3479 | 0.3521 | 41979 | 45625 | 12397 | 42522 | 45374 | 12104 | 26.95   | 17.04   |
| 100000 | 0.99 | 0.6500 | 0.3500 | 42250 | 45045 | 12250 | 2.08   | 0.6479 | 0.6521 | 0.3479 | 0.3521 | 41979 | 45625 | 12397 | 42522 | 45374 | 12104 | 10.85   | 5.88    |
| 100000 | 1.00 | 0.6500 | 0.3500 | 42250 | 45500 | 12250 | 0.00   | 0.6479 | 0.6521 | 0.3479 | 0.3521 | 41979 | 45625 | 12397 | 42522 | 45374 | 12104 | 3.83    | 3.85    |
| 100000 | 1.01 | 0.6500 | 0.3500 | 42250 | 45955 | 12250 | 2.06   | 0.6479 | 0.6521 | 0.3479 | 0.3521 | 41979 | 45625 | 12397 | 42522 | 45374 | 12104 | 5.88    | 10.95   |
| 100000 | 1.02 | 0.6500 | 0.3500 | 42250 | 46410 | 12250 | 8.19   | 0.6479 | 0.6521 | 0.3479 | 0.3521 | 41979 | 45625 | 12397 | 42522 | 45374 | 12104 | 17.01   | 27.17   |
| 100000 | 1.03 | 0.6500 | 0.3500 | 42250 | 46865 | 12250 | 18.33  | 0.6479 | 0.6521 | 0.3479 | 0.3521 | 41979 | 45625 | 12397 | 42522 | 45374 | 12104 | 37.22   | 52.52   |
| 100000 | 1.04 | 0.6500 | 0.3500 | 42250 | 47320 | 12250 | 32.42  | 0.6479 | 0.6521 | 0.3479 | 0.3521 | 41979 | 45625 | 12397 | 42522 | 45374 | 12104 | 66.50   | 86.99   |
| 100000 | 1.05 | 0.6500 | 0.3500 | 42250 | 47775 | 12250 | 50.39  | 0.6479 | 0.6521 | 0.3479 | 0.3521 | 41979 | 45625 | 12397 | 42522 | 45374 | 12104 | 104.85  | 130.58  |
| 100000 | 1.06 | 0.6500 | 0.3500 | 42250 | 48230 | 12250 | 72.18  | 0.6479 | 0.6521 | 0.3479 | 0.3521 | 41979 | 45625 | 12397 | 42522 | 45374 | 12104 | 152.28  | 183.31  |
| 100000 | 1.07 | 0.6500 | 0.3500 | 42250 | 48685 | 12250 | 97.73  | 0.6479 | 0.6521 | 0.3479 | 0.3521 | 41979 | 45625 | 12397 | 42522 | 45374 | 12104 | 208.78  | 245.15  |
| 100000 | 1.08 | 0.6500 | 0.3500 | 42250 | 49140 | 12250 | 126.99 | 0.6479 | 0.6521 | 0.3479 | 0.3521 | 41979 | 45625 | 12397 | 42522 | 45374 | 12104 | 274.36  | 316.13  |
| 100000 | 1.09 | 0.6500 | 0.3500 | 42250 | 49595 | 12250 | 159.90 | 0.6479 | 0.6521 | 0.3479 | 0.3521 | 41979 | 45625 | 12397 | 42522 | 45374 | 12104 | 349.02  | 396.23  |
| 100000 | 1.10 | 0.6500 | 0.3500 | 42250 | 50050 | 12250 | 196.40 | 0.6479 | 0.6521 | 0.3479 | 0.3521 | 41979 | 45625 | 12397 | 42522 | 45374 | 12104 | 432.75  | 485.45  |
| 100000 | 1.11 | 0.6500 | 0.3500 | 42250 | 50505 | 12250 | 236.44 | 0.6479 | 0.6521 | 0.3479 | 0.3521 | 41979 | 45625 | 12397 | 42522 | 45374 | 12104 | 525.55  | 583.80  |
| 100000 | 1.12 | 0.6500 | 0.3500 | 42250 | 50960 | 12250 | 279.97 | 0.6479 | 0.6521 | 0.3479 | 0.3521 | 41979 | 45625 | 12397 | 42522 | 45374 | 12104 | 627.43  | 691.27  |
| 100000 | 1.13 | 0.6500 | 0.3500 | 42250 | 51415 | 12250 | 326.93 | 0.6479 | 0.6521 | 0.3479 | 0.3521 | 41979 | 45625 | 12397 | 42522 | 45374 | 12104 | 738.39  | 807.87  |
| 100000 | 1.14 | 0.6500 | 0.3500 | 42250 | 51870 | 12250 | 377.28 | 0.6479 | 0.6521 | 0.3479 | 0.3521 | 41979 | 45625 | 12397 | 42522 | 45374 | 12104 | 858.42  | 933.60  |

|        |      |        |        |       |       |       |        |        |        |        |        |       |       |       |       |       |       |         |         |
|--------|------|--------|--------|-------|-------|-------|--------|--------|--------|--------|--------|-------|-------|-------|-------|-------|-------|---------|---------|
| 100000 | 1.15 | 0.6500 | 0.3500 | 42250 | 52325 | 12250 | 430.96 | 0.6479 | 0.6521 | 0.3479 | 0.3521 | 41979 | 45625 | 12397 | 42522 | 45374 | 12104 | 987.52  | 1068.45 |
| 100000 | 1.16 | 0.6500 | 0.3500 | 42250 | 52780 | 12250 | 487.94 | 0.6479 | 0.6521 | 0.3479 | 0.3521 | 41979 | 45625 | 12397 | 42522 | 45374 | 12104 | 1125.70 | 1212.42 |
| 100000 | 1.17 | 0.6500 | 0.3500 | 42250 | 53235 | 12250 | 548.15 | 0.6479 | 0.6521 | 0.3479 | 0.3521 | 41979 | 45625 | 12397 | 42522 | 45374 | 12104 | 1272.96 | 1365.52 |
| 100000 | 1.18 | 0.6500 | 0.3500 | 42250 | 53690 | 12250 | 611.55 | 0.6479 | 0.6521 | 0.3479 | 0.3521 | 41979 | 45625 | 12397 | 42522 | 45374 | 12104 | 1429.29 | 1527.75 |
| 100000 | 1.19 | 0.6500 | 0.3500 | 42250 | 54145 | 12250 | 678.11 | 0.6479 | 0.6521 | 0.3479 | 0.3521 | 41979 | 45625 | 12397 | 42522 | 45374 | 12104 | 1594.70 | 1699.10 |
| 100000 | 1.20 | 0.6500 | 0.3500 | 42250 | 54600 | 12250 | 747.77 | 0.6479 | 0.6521 | 0.3479 | 0.3521 | 41979 | 45625 | 12397 | 42522 | 45374 | 12104 | 1769.18 | 1879.58 |
| 100000 | 0.80 | 0.7000 | 0.3000 | 49000 | 33600 | 9000  | 801.10 | 0.6980 | 0.7020 | 0.2980 | 0.3020 | 48719 | 42160 | 9121  | 49282 | 41839 | 8880  | 1741.16 | 1625.50 |
| 100000 | 0.81 | 0.7000 | 0.3000 | 49000 | 34020 | 9000  | 718.00 | 0.6980 | 0.7020 | 0.2980 | 0.3020 | 48719 | 42160 | 9121  | 49282 | 41839 | 8880  | 1574.80 | 1464.31 |
| 100000 | 0.82 | 0.7000 | 0.3000 | 49000 | 34440 | 9000  | 640.00 | 0.6980 | 0.7020 | 0.2980 | 0.3020 | 48719 | 42160 | 9121  | 49282 | 41839 | 8880  | 1416.80 | 1311.55 |
| 100000 | 0.83 | 0.7000 | 0.3000 | 49000 | 34860 | 9000  | 567.00 | 0.6980 | 0.7020 | 0.2980 | 0.3020 | 48719 | 42160 | 9121  | 49282 | 41839 | 8880  | 1267.17 | 1167.23 |
| 100000 | 0.84 | 0.7000 | 0.3000 | 49000 | 35280 | 9000  | 498.89 | 0.6980 | 0.7020 | 0.2980 | 0.3020 | 48719 | 42160 | 9121  | 49282 | 41839 | 8880  | 1125.91 | 1031.33 |
| 100000 | 0.85 | 0.7000 | 0.3000 | 49000 | 35700 | 9000  | 435.56 | 0.6980 | 0.7020 | 0.2980 | 0.3020 | 48719 | 42160 | 9121  | 49282 | 41839 | 8880  | 993.02  | 903.87  |
| 100000 | 0.86 | 0.7000 | 0.3000 | 49000 | 36120 | 9000  | 376.93 | 0.6980 | 0.7020 | 0.2980 | 0.3020 | 48719 | 42160 | 9121  | 49282 | 41839 | 8880  | 868.50  | 784.85  |
| 100000 | 0.87 | 0.7000 | 0.3000 | 49000 | 36540 | 9000  | 322.89 | 0.6980 | 0.7020 | 0.2980 | 0.3020 | 48719 | 42160 | 9121  | 49282 | 41839 | 8880  | 752.34  | 674.25  |
| 100000 | 0.88 | 0.7000 | 0.3000 | 49000 | 36960 | 9000  | 273.35 | 0.6980 | 0.7020 | 0.2980 | 0.3020 | 48719 | 42160 | 9121  | 49282 | 41839 | 8880  | 644.56  | 572.09  |
| 100000 | 0.89 | 0.7000 | 0.3000 | 49000 | 37380 | 9000  | 228.22 | 0.6980 | 0.7020 | 0.2980 | 0.3020 | 48719 | 42160 | 9121  | 49282 | 41839 | 8880  | 545.14  | 478.36  |
| 100000 | 0.90 | 0.7000 | 0.3000 | 49000 | 37800 | 9000  | 187.41 | 0.6980 | 0.7020 | 0.2980 | 0.3020 | 48719 | 42160 | 9121  | 49282 | 41839 | 8880  | 454.09  | 393.06  |
| 100000 | 0.91 | 0.7000 | 0.3000 | 49000 | 38220 | 9000  | 150.85 | 0.6980 | 0.7020 | 0.2980 | 0.3020 | 48719 | 42160 | 9121  | 49282 | 41839 | 8880  | 371.40  | 316.19  |
| 100000 | 0.92 | 0.7000 | 0.3000 | 49000 | 38640 | 9000  | 118.45 | 0.6980 | 0.7020 | 0.2980 | 0.3020 | 48719 | 42160 | 9121  | 49282 | 41839 | 8880  | 297.09  | 247.76  |
| 100000 | 0.93 | 0.7000 | 0.3000 | 49000 | 39060 | 9000  | 90.13  | 0.6980 | 0.7020 | 0.2980 | 0.3020 | 48719 | 42160 | 9121  | 49282 | 41839 | 8880  | 231.14  | 187.76  |
| 100000 | 0.94 | 0.7000 | 0.3000 | 49000 | 39480 | 9000  | 65.81  | 0.6980 | 0.7020 | 0.2980 | 0.3020 | 48719 | 42160 | 9121  | 49282 | 41839 | 8880  | 173.56  | 136.19  |
| 100000 | 0.95 | 0.7000 | 0.3000 | 49000 | 39900 | 9000  | 45.43  | 0.6980 | 0.7020 | 0.2980 | 0.3020 | 48719 | 42160 | 9121  | 49282 | 41839 | 8880  | 124.35  | 93.05   |
| 100000 | 0.96 | 0.7000 | 0.3000 | 49000 | 40320 | 9000  | 28.90  | 0.6980 | 0.7020 | 0.2980 | 0.3020 | 48719 | 42160 | 9121  | 49282 | 41839 | 8880  | 83.51   | 58.35   |
| 100000 | 0.97 | 0.7000 | 0.3000 | 49000 | 40740 | 9000  | 16.16  | 0.6980 | 0.7020 | 0.2980 | 0.3020 | 48719 | 42160 | 9121  | 49282 | 41839 | 8880  | 51.04   | 32.08   |
| 100000 | 0.98 | 0.7000 | 0.3000 | 49000 | 41160 | 9000  | 7.14   | 0.6980 | 0.7020 | 0.2980 | 0.3020 | 48719 | 42160 | 9121  | 49282 | 41839 | 8880  | 26.93   | 14.24   |
| 100000 | 0.99 | 0.7000 | 0.3000 | 49000 | 41580 | 9000  | 1.77   | 0.6980 | 0.7020 | 0.2980 | 0.3020 | 48719 | 42160 | 9121  | 49282 | 41839 | 8880  | 11.20   | 4.83    |
| 100000 | 1.00 | 0.7000 | 0.3000 | 49000 | 42000 | 9000  | 0.00   | 0.6980 | 0.7020 | 0.2980 | 0.3020 | 48719 | 42160 | 9121  | 49282 | 41839 | 8880  | 3.83    | 3.86    |
| 100000 | 1.01 | 0.7000 | 0.3000 | 49000 | 42420 | 9000  | 1.75   | 0.6980 | 0.7020 | 0.2980 | 0.3020 | 48719 | 42160 | 9121  | 49282 | 41839 | 8880  | 4.83    | 11.31   |
| 100000 | 1.02 | 0.7000 | 0.3000 | 49000 | 42840 | 9000  | 6.98   | 0.6980 | 0.7020 | 0.2980 | 0.3020 | 48719 | 42160 | 9121  | 49282 | 41839 | 8880  | 14.19   | 27.21   |
| 100000 | 1.03 | 0.7000 | 0.3000 | 49000 | 43260 | 9000  | 15.61  | 0.6980 | 0.7020 | 0.2980 | 0.3020 | 48719 | 42160 | 9121  | 49282 | 41839 | 8880  | 31.93   | 51.53   |
| 100000 | 1.04 | 0.7000 | 0.3000 | 49000 | 43680 | 9000  | 27.59  | 0.6980 | 0.7020 | 0.2980 | 0.3020 | 48719 | 42160 | 9121  | 49282 | 41839 | 8880  | 58.03   | 84.28   |
| 100000 | 1.05 | 0.7000 | 0.3000 | 49000 | 44100 | 9000  | 42.86  | 0.6980 | 0.7020 | 0.2980 | 0.3020 | 48719 | 42160 | 9121  | 49282 | 41839 | 8880  | 92.50   | 125.47  |
| 100000 | 1.06 | 0.7000 | 0.3000 | 49000 | 44520 | 9000  | 61.38  | 0.6980 | 0.7020 | 0.2980 | 0.3020 | 48719 | 42160 | 9121  | 49282 | 41839 | 8880  | 135.34  | 175.09  |
| 100000 | 1.07 | 0.7000 | 0.3000 | 49000 | 44940 | 9000  | 83.09  | 0.6980 | 0.7020 | 0.2980 | 0.3020 | 48719 | 42160 | 9121  | 49282 | 41839 | 8880  | 186.55  | 233.15  |
| 100000 | 1.08 | 0.7000 | 0.3000 | 49000 | 45360 | 9000  | 107.94 | 0.6980 | 0.7020 | 0.2980 | 0.3020 | 48719 | 42160 | 9121  | 49282 | 41839 | 8880  | 246.13  | 299.63  |

|        |      |        |        |       |       |      |        |        |        |        |        |       |       |      |       |       |      |         |         |
|--------|------|--------|--------|-------|-------|------|--------|--------|--------|--------|--------|-------|-------|------|-------|-------|------|---------|---------|
| 100000 | 1.09 | 0.7000 | 0.3000 | 49000 | 45780 | 9000 | 135.87 | 0.6980 | 0.7020 | 0.2980 | 0.3020 | 48719 | 42160 | 9121 | 49282 | 41839 | 8880 | 314.07  | 374.55  |
| 100000 | 1.10 | 0.7000 | 0.3000 | 49000 | 46200 | 9000 | 166.84 | 0.6980 | 0.7020 | 0.2980 | 0.3020 | 48719 | 42160 | 9121 | 49282 | 41839 | 8880 | 390.38  | 457.90  |
| 100000 | 1.11 | 0.7000 | 0.3000 | 49000 | 46620 | 9000 | 200.80 | 0.6980 | 0.7020 | 0.2980 | 0.3020 | 48719 | 42160 | 9121 | 49282 | 41839 | 8880 | 475.06  | 549.68  |
| 100000 | 1.12 | 0.7000 | 0.3000 | 49000 | 47040 | 9000 | 237.71 | 0.6980 | 0.7020 | 0.2980 | 0.3020 | 48719 | 42160 | 9121 | 49282 | 41839 | 8880 | 568.11  | 649.90  |
| 100000 | 1.13 | 0.7000 | 0.3000 | 49000 | 47460 | 9000 | 277.52 | 0.6980 | 0.7020 | 0.2980 | 0.3020 | 48719 | 42160 | 9121 | 49282 | 41839 | 8880 | 669.53  | 758.54  |
| 100000 | 1.14 | 0.7000 | 0.3000 | 49000 | 47880 | 9000 | 320.18 | 0.6980 | 0.7020 | 0.2980 | 0.3020 | 48719 | 42160 | 9121 | 49282 | 41839 | 8880 | 779.31  | 875.62  |
| 100000 | 1.15 | 0.7000 | 0.3000 | 49000 | 48300 | 9000 | 365.66 | 0.6980 | 0.7020 | 0.2980 | 0.3020 | 48719 | 42160 | 9121 | 49282 | 41839 | 8880 | 897.47  | 1001.13 |
| 100000 | 1.16 | 0.7000 | 0.3000 | 49000 | 48720 | 9000 | 413.90 | 0.6980 | 0.7020 | 0.2980 | 0.3020 | 48719 | 42160 | 9121 | 49282 | 41839 | 8880 | 1023.99 | 1135.08 |
| 100000 | 1.17 | 0.7000 | 0.3000 | 49000 | 49140 | 9000 | 464.88 | 0.6980 | 0.7020 | 0.2980 | 0.3020 | 48719 | 42160 | 9121 | 49282 | 41839 | 8880 | 1158.88 | 1277.46 |
| 100000 | 1.18 | 0.7000 | 0.3000 | 49000 | 49560 | 9000 | 518.55 | 0.6980 | 0.7020 | 0.2980 | 0.3020 | 48719 | 42160 | 9121 | 49282 | 41839 | 8880 | 1302.13 | 1428.27 |
| 100000 | 1.19 | 0.7000 | 0.3000 | 49000 | 49980 | 9000 | 574.87 | 0.6980 | 0.7020 | 0.2980 | 0.3020 | 48719 | 42160 | 9121 | 49282 | 41839 | 8880 | 1453.76 | 1587.51 |
| 100000 | 1.20 | 0.7000 | 0.3000 | 49000 | 50400 | 9000 | 633.80 | 0.6980 | 0.7020 | 0.2980 | 0.3020 | 48719 | 42160 | 9121 | 49282 | 41839 | 8880 | 1613.75 | 1755.18 |
| 100000 | 0.80 | 0.7500 | 0.2500 | 56250 | 30000 | 6250 | 646.34 | 0.7481 | 0.7519 | 0.2481 | 0.2519 | 55966 | 37689 | 6345 | 56535 | 37310 | 6155 | 1571.54 | 1434.93 |
| 100000 | 0.81 | 0.7500 | 0.2500 | 56250 | 30375 | 6250 | 578.85 | 0.7481 | 0.7519 | 0.2481 | 0.2519 | 55966 | 37689 | 6345 | 56535 | 37310 | 6155 | 1422.26 | 1291.77 |
| 100000 | 0.82 | 0.7500 | 0.2500 | 56250 | 30750 | 6250 | 515.58 | 0.7481 | 0.7519 | 0.2481 | 0.2519 | 55966 | 37689 | 6345 | 56535 | 37310 | 6155 | 1280.45 | 1156.14 |
| 100000 | 0.83 | 0.7500 | 0.2500 | 56250 | 31125 | 6250 | 456.44 | 0.7481 | 0.7519 | 0.2481 | 0.2519 | 55966 | 37689 | 6345 | 56535 | 37310 | 6155 | 1146.09 | 1028.05 |
| 100000 | 0.84 | 0.7500 | 0.2500 | 56250 | 31500 | 6250 | 401.33 | 0.7481 | 0.7519 | 0.2481 | 0.2519 | 55966 | 37689 | 6345 | 56535 | 37310 | 6155 | 1019.20 | 907.49  |
| 100000 | 0.85 | 0.7500 | 0.2500 | 56250 | 31875 | 6250 | 350.14 | 0.7481 | 0.7519 | 0.2481 | 0.2519 | 55966 | 37689 | 6345 | 56535 | 37310 | 6155 | 899.77  | 794.48  |
| 100000 | 0.86 | 0.7500 | 0.2500 | 56250 | 32250 | 6250 | 302.80 | 0.7481 | 0.7519 | 0.2481 | 0.2519 | 55966 | 37689 | 6345 | 56535 | 37310 | 6155 | 787.81  | 689.00  |
| 100000 | 0.87 | 0.7500 | 0.2500 | 56250 | 32625 | 6250 | 259.22 | 0.7481 | 0.7519 | 0.2481 | 0.2519 | 55966 | 37689 | 6345 | 56535 | 37310 | 6155 | 683.30  | 591.07  |
| 100000 | 0.88 | 0.7500 | 0.2500 | 56250 | 33000 | 6250 | 219.31 | 0.7481 | 0.7519 | 0.2481 | 0.2519 | 55966 | 37689 | 6345 | 56535 | 37310 | 6155 | 586.26  | 500.67  |
| 100000 | 0.89 | 0.7500 | 0.2500 | 56250 | 33375 | 6250 | 182.99 | 0.7481 | 0.7519 | 0.2481 | 0.2519 | 55966 | 37689 | 6345 | 56535 | 37310 | 6155 | 496.68  | 417.80  |
| 100000 | 0.90 | 0.7500 | 0.2500 | 56250 | 33750 | 6250 | 150.18 | 0.7481 | 0.7519 | 0.2481 | 0.2519 | 55966 | 37689 | 6345 | 56535 | 37310 | 6155 | 414.56  | 342.48  |
| 100000 | 0.91 | 0.7500 | 0.2500 | 56250 | 34125 | 6250 | 120.81 | 0.7481 | 0.7519 | 0.2481 | 0.2519 | 55966 | 37689 | 6345 | 56535 | 37310 | 6155 | 339.91  | 274.70  |
| 100000 | 0.92 | 0.7500 | 0.2500 | 56250 | 34500 | 6250 | 94.81  | 0.7481 | 0.7519 | 0.2481 | 0.2519 | 55966 | 37689 | 6345 | 56535 | 37310 | 6155 | 272.72  | 214.45  |
| 100000 | 0.93 | 0.7500 | 0.2500 | 56250 | 34875 | 6250 | 72.10  | 0.7481 | 0.7519 | 0.2481 | 0.2519 | 55966 | 37689 | 6345 | 56535 | 37310 | 6155 | 212.99  | 161.74  |
| 100000 | 0.94 | 0.7500 | 0.2500 | 56250 | 35250 | 6250 | 52.62  | 0.7481 | 0.7519 | 0.2481 | 0.2519 | 55966 | 37689 | 6345 | 56535 | 37310 | 6155 | 160.72  | 116.57  |
| 100000 | 0.95 | 0.7500 | 0.2500 | 56250 | 35625 | 6250 | 36.30  | 0.7481 | 0.7519 | 0.2481 | 0.2519 | 55966 | 37689 | 6345 | 56535 | 37310 | 6155 | 115.91  | 78.94   |
| 100000 | 0.96 | 0.7500 | 0.2500 | 56250 | 36000 | 6250 | 23.08  | 0.7481 | 0.7519 | 0.2481 | 0.2519 | 55966 | 37689 | 6345 | 56535 | 37310 | 6155 | 78.57   | 48.85   |
| 100000 | 0.97 | 0.7500 | 0.2500 | 56250 | 36375 | 6250 | 12.90  | 0.7481 | 0.7519 | 0.2481 | 0.2519 | 55966 | 37689 | 6345 | 56535 | 37310 | 6155 | 48.69   | 26.30   |
| 100000 | 0.98 | 0.7500 | 0.2500 | 56250 | 36750 | 6250 | 5.70   | 0.7481 | 0.7519 | 0.2481 | 0.2519 | 55966 | 37689 | 6345 | 56535 | 37310 | 6155 | 26.27   | 11.28   |
| 100000 | 0.99 | 0.7500 | 0.2500 | 56250 | 37125 | 6250 | 1.42   | 0.7481 | 0.7519 | 0.2481 | 0.2519 | 55966 | 37689 | 6345 | 56535 | 37310 | 6155 | 11.32   | 3.80    |
| 100000 | 1.00 | 0.7500 | 0.2500 | 56250 | 37500 | 6250 | 0.00   | 0.7481 | 0.7519 | 0.2481 | 0.2519 | 55966 | 37689 | 6345 | 56535 | 37310 | 6155 | 3.82    | 3.86    |
| 100000 | 1.01 | 0.7500 | 0.2500 | 56250 | 37875 | 6250 | 1.40   | 0.7481 | 0.7519 | 0.2481 | 0.2519 | 55966 | 37689 | 6345 | 56535 | 37310 | 6155 | 3.79    | 11.46   |
| 100000 | 1.02 | 0.7500 | 0.2500 | 56250 | 38250 | 6250 | 5.56   | 0.7481 | 0.7519 | 0.2481 | 0.2519 | 55966 | 37689 | 6345 | 56535 | 37310 | 6155 | 11.22   | 26.60   |

|        |      |        |        |       |       |      |        |        |        |        |        |       |       |      |       |       |      |         |         |
|--------|------|--------|--------|-------|-------|------|--------|--------|--------|--------|--------|-------|-------|------|-------|-------|------|---------|---------|
| 100000 | 1.03 | 0.7500 | 0.2500 | 56250 | 38625 | 6250 | 12.42  | 0.7481 | 0.7519 | 0.2481 | 0.2519 | 55966 | 37689 | 6345 | 56535 | 37310 | 6155 | 26.12   | 49.27   |
| 100000 | 1.04 | 0.7500 | 0.2500 | 56250 | 39000 | 6250 | 21.95  | 0.7481 | 0.7519 | 0.2481 | 0.2519 | 55966 | 37689 | 6345 | 56535 | 37310 | 6155 | 48.47   | 79.49   |
| 100000 | 1.05 | 0.7500 | 0.2500 | 56250 | 39375 | 6250 | 34.10  | 0.7481 | 0.7519 | 0.2481 | 0.2519 | 55966 | 37689 | 6345 | 56535 | 37310 | 6155 | 78.29   | 117.24  |
| 100000 | 1.06 | 0.7500 | 0.2500 | 56250 | 39750 | 6250 | 48.81  | 0.7481 | 0.7519 | 0.2481 | 0.2519 | 55966 | 37689 | 6345 | 56535 | 37310 | 6155 | 115.57  | 162.53  |
| 100000 | 1.07 | 0.7500 | 0.2500 | 56250 | 40125 | 6250 | 66.05  | 0.7481 | 0.7519 | 0.2481 | 0.2519 | 55966 | 37689 | 6345 | 56535 | 37310 | 6155 | 160.32  | 215.36  |
| 100000 | 1.08 | 0.7500 | 0.2500 | 56250 | 40500 | 6250 | 85.77  | 0.7481 | 0.7519 | 0.2481 | 0.2519 | 55966 | 37689 | 6345 | 56535 | 37310 | 6155 | 212.52  | 275.72  |
| 100000 | 1.09 | 0.7500 | 0.2500 | 56250 | 40875 | 6250 | 107.93 | 0.7481 | 0.7519 | 0.2481 | 0.2519 | 55966 | 37689 | 6345 | 56535 | 37310 | 6155 | 272.19  | 343.63  |
| 100000 | 1.10 | 0.7500 | 0.2500 | 56250 | 41250 | 6250 | 132.48 | 0.7481 | 0.7519 | 0.2481 | 0.2519 | 55966 | 37689 | 6345 | 56535 | 37310 | 6155 | 339.32  | 419.07  |
| 100000 | 1.11 | 0.7500 | 0.2500 | 56250 | 41625 | 6250 | 159.40 | 0.7481 | 0.7519 | 0.2481 | 0.2519 | 55966 | 37689 | 6345 | 56535 | 37310 | 6155 | 413.91  | 502.05  |
| 100000 | 1.12 | 0.7500 | 0.2500 | 56250 | 42000 | 6250 | 188.64 | 0.7481 | 0.7519 | 0.2481 | 0.2519 | 55966 | 37689 | 6345 | 56535 | 37310 | 6155 | 495.97  | 592.57  |
| 100000 | 1.13 | 0.7500 | 0.2500 | 56250 | 42375 | 6250 | 220.16 | 0.7481 | 0.7519 | 0.2481 | 0.2519 | 55966 | 37689 | 6345 | 56535 | 37310 | 6155 | 585.49  | 690.63  |
| 100000 | 1.14 | 0.7500 | 0.2500 | 56250 | 42750 | 6250 | 253.92 | 0.7481 | 0.7519 | 0.2481 | 0.2519 | 55966 | 37689 | 6345 | 56535 | 37310 | 6155 | 682.47  | 796.23  |
| 100000 | 1.15 | 0.7500 | 0.2500 | 56250 | 43125 | 6250 | 289.90 | 0.7481 | 0.7519 | 0.2481 | 0.2519 | 55966 | 37689 | 6345 | 56535 | 37310 | 6155 | 786.91  | 909.36  |
| 100000 | 1.16 | 0.7500 | 0.2500 | 56250 | 43500 | 6250 | 328.06 | 0.7481 | 0.7519 | 0.2481 | 0.2519 | 55966 | 37689 | 6345 | 56535 | 37310 | 6155 | 898.81  | 1030.03 |
| 100000 | 1.17 | 0.7500 | 0.2500 | 56250 | 43875 | 6250 | 368.36 | 0.7481 | 0.7519 | 0.2481 | 0.2519 | 55966 | 37689 | 6345 | 56535 | 37310 | 6155 | 1018.18 | 1158.24 |
| 100000 | 1.18 | 0.7500 | 0.2500 | 56250 | 44250 | 6250 | 410.78 | 0.7481 | 0.7519 | 0.2481 | 0.2519 | 55966 | 37689 | 6345 | 56535 | 37310 | 6155 | 1145.01 | 1293.99 |
| 100000 | 1.19 | 0.7500 | 0.2500 | 56250 | 44625 | 6250 | 455.27 | 0.7481 | 0.7519 | 0.2481 | 0.2519 | 55966 | 37689 | 6345 | 56535 | 37310 | 6155 | 1279.30 | 1437.28 |
| 100000 | 1.20 | 0.7500 | 0.2500 | 56250 | 45000 | 6250 | 501.81 | 0.7481 | 0.7519 | 0.2481 | 0.2519 | 55966 | 37689 | 6345 | 56535 | 37310 | 6155 | 1421.06 | 1588.11 |
| 100000 | 0.80 | 0.8000 | 0.2000 | 64000 | 25600 | 4000 | 477.55 | 0.7982 | 0.8018 | 0.1982 | 0.2018 | 63720 | 32210 | 4070 | 64281 | 31789 | 3930 | 1358.84 | 1207.41 |
| 100000 | 0.81 | 0.8000 | 0.2000 | 64000 | 25920 | 4000 | 427.29 | 0.7982 | 0.8018 | 0.1982 | 0.2018 | 63720 | 32210 | 4070 | 64281 | 31789 | 3930 | 1230.68 | 1086.03 |
| 100000 | 0.82 | 0.8000 | 0.2000 | 64000 | 26240 | 4000 | 380.24 | 0.7982 | 0.8018 | 0.1982 | 0.2018 | 63720 | 32210 | 4070 | 64281 | 31789 | 3930 | 1108.88 | 971.09  |
| 100000 | 0.83 | 0.8000 | 0.2000 | 64000 | 26560 | 4000 | 336.33 | 0.7982 | 0.8018 | 0.1982 | 0.2018 | 63720 | 32210 | 4070 | 64281 | 31789 | 3930 | 993.45  | 862.59  |
| 100000 | 0.84 | 0.8000 | 0.2000 | 64000 | 26880 | 4000 | 295.47 | 0.7982 | 0.8018 | 0.1982 | 0.2018 | 63720 | 32210 | 4070 | 64281 | 31789 | 3930 | 884.37  | 760.54  |
| 100000 | 0.85 | 0.8000 | 0.2000 | 64000 | 27200 | 4000 | 257.57 | 0.7982 | 0.8018 | 0.1982 | 0.2018 | 63720 | 32210 | 4070 | 64281 | 31789 | 3930 | 781.64  | 664.93  |
| 100000 | 0.86 | 0.8000 | 0.2000 | 64000 | 27520 | 4000 | 222.57 | 0.7982 | 0.8018 | 0.1982 | 0.2018 | 63720 | 32210 | 4070 | 64281 | 31789 | 3930 | 685.28  | 575.76  |
| 100000 | 0.87 | 0.8000 | 0.2000 | 64000 | 27840 | 4000 | 190.38 | 0.7982 | 0.8018 | 0.1982 | 0.2018 | 63720 | 32210 | 4070 | 64281 | 31789 | 3930 | 595.28  | 493.04  |
| 100000 | 0.88 | 0.8000 | 0.2000 | 64000 | 28160 | 4000 | 160.94 | 0.7982 | 0.8018 | 0.1982 | 0.2018 | 63720 | 32210 | 4070 | 64281 | 31789 | 3930 | 511.63  | 416.75  |
| 100000 | 0.89 | 0.8000 | 0.2000 | 64000 | 28480 | 4000 | 134.19 | 0.7982 | 0.8018 | 0.1982 | 0.2018 | 63720 | 32210 | 4070 | 64281 | 31789 | 3930 | 434.34  | 346.91  |
| 100000 | 0.90 | 0.8000 | 0.2000 | 64000 | 28800 | 4000 | 110.05 | 0.7982 | 0.8018 | 0.1982 | 0.2018 | 63720 | 32210 | 4070 | 64281 | 31789 | 3930 | 363.41  | 283.51  |
| 100000 | 0.91 | 0.8000 | 0.2000 | 64000 | 29120 | 4000 | 88.47  | 0.7982 | 0.8018 | 0.1982 | 0.2018 | 63720 | 32210 | 4070 | 64281 | 31789 | 3930 | 298.84  | 226.56  |
| 100000 | 0.92 | 0.8000 | 0.2000 | 64000 | 29440 | 4000 | 69.38  | 0.7982 | 0.8018 | 0.1982 | 0.2018 | 63720 | 32210 | 4070 | 64281 | 31789 | 3930 | 240.63  | 176.04  |
| 100000 | 0.93 | 0.8000 | 0.2000 | 64000 | 29760 | 4000 | 52.72  | 0.7982 | 0.8018 | 0.1982 | 0.2018 | 63720 | 32210 | 4070 | 64281 | 31789 | 3930 | 188.77  | 131.97  |
| 100000 | 0.94 | 0.8000 | 0.2000 | 64000 | 30080 | 4000 | 38.45  | 0.7982 | 0.8018 | 0.1982 | 0.2018 | 63720 | 32210 | 4070 | 64281 | 31789 | 3930 | 143.27  | 94.35   |
| 100000 | 0.95 | 0.8000 | 0.2000 | 64000 | 30400 | 4000 | 26.51  | 0.7982 | 0.8018 | 0.1982 | 0.2018 | 63720 | 32210 | 4070 | 64281 | 31789 | 3930 | 104.13  | 63.16   |
| 100000 | 0.96 | 0.8000 | 0.2000 | 64000 | 30720 | 4000 | 16.85  | 0.7982 | 0.8018 | 0.1982 | 0.2018 | 63720 | 32210 | 4070 | 64281 | 31789 | 3930 | 71.35   | 38.42   |



|        |      |        |        |       |       |      |        |        |        |        |        |       |       |      |       |       |      |         |         |
|--------|------|--------|--------|-------|-------|------|--------|--------|--------|--------|--------|-------|-------|------|-------|-------|------|---------|---------|
| 100000 | 0.97 | 0.8000 | 0.2000 | 64000 | 31040 | 4000 | 9.41   | 0.7982 | 0.8018 | 0.1982 | 0.2018 | 63720 | 32210 | 4070 | 64281 | 31789 | 3930 | 44.93   | 20.12   |
| 100000 | 0.98 | 0.8000 | 0.2000 | 64000 | 31360 | 4000 | 4.15   | 0.7982 | 0.8018 | 0.1982 | 0.2018 | 63720 | 32210 | 4070 | 64281 | 31789 | 3930 | 24.87   | 8.26    |
| 100000 | 0.99 | 0.8000 | 0.2000 | 64000 | 31680 | 4000 | 1.03   | 0.7982 | 0.8018 | 0.1982 | 0.2018 | 63720 | 32210 | 4070 | 64281 | 31789 | 3930 | 11.16   | 2.84    |
| 100000 | 1.00 | 0.8000 | 0.2000 | 64000 | 32000 | 4000 | 0.00   | 0.7982 | 0.8018 | 0.1982 | 0.2018 | 63720 | 32210 | 4070 | 64281 | 31789 | 3930 | 3.82    | 3.87    |
| 100000 | 1.01 | 0.8000 | 0.2000 | 64000 | 32320 | 4000 | 1.02   | 0.7982 | 0.8018 | 0.1982 | 0.2018 | 63720 | 32210 | 4070 | 64281 | 31789 | 3930 | 2.83    | 11.34   |
| 100000 | 1.02 | 0.8000 | 0.2000 | 64000 | 32640 | 4000 | 4.04   | 0.7982 | 0.8018 | 0.1982 | 0.2018 | 63720 | 32210 | 4070 | 64281 | 31789 | 3930 | 8.20    | 25.25   |
| 100000 | 1.03 | 0.8000 | 0.2000 | 64000 | 32960 | 4000 | 9.03   | 0.7982 | 0.8018 | 0.1982 | 0.2018 | 63720 | 32210 | 4070 | 64281 | 31789 | 3930 | 19.93   | 45.60   |
| 100000 | 1.04 | 0.8000 | 0.2000 | 64000 | 33280 | 4000 | 15.95  | 0.7982 | 0.8018 | 0.1982 | 0.2018 | 63720 | 32210 | 4070 | 64281 | 31789 | 3930 | 38.01   | 72.40   |
| 100000 | 1.05 | 0.8000 | 0.2000 | 64000 | 33600 | 4000 | 24.77  | 0.7982 | 0.8018 | 0.1982 | 0.2018 | 63720 | 32210 | 4070 | 64281 | 31789 | 3930 | 62.46   | 105.64  |
| 100000 | 1.06 | 0.8000 | 0.2000 | 64000 | 33920 | 4000 | 35.44  | 0.7982 | 0.8018 | 0.1982 | 0.2018 | 63720 | 32210 | 4070 | 64281 | 31789 | 3930 | 93.26   | 145.32  |
| 100000 | 1.07 | 0.8000 | 0.2000 | 64000 | 34240 | 4000 | 47.93  | 0.7982 | 0.8018 | 0.1982 | 0.2018 | 63720 | 32210 | 4070 | 64281 | 31789 | 3930 | 130.42  | 191.44  |
| 100000 | 1.08 | 0.8000 | 0.2000 | 64000 | 34560 | 4000 | 62.21  | 0.7982 | 0.8018 | 0.1982 | 0.2018 | 63720 | 32210 | 4070 | 64281 | 31789 | 3930 | 173.94  | 244.01  |
| 100000 | 1.09 | 0.8000 | 0.2000 | 64000 | 34880 | 4000 | 78.25  | 0.7982 | 0.8018 | 0.1982 | 0.2018 | 63720 | 32210 | 4070 | 64281 | 31789 | 3930 | 223.82  | 303.02  |
| 100000 | 1.10 | 0.8000 | 0.2000 | 64000 | 35200 | 4000 | 96.01  | 0.7982 | 0.8018 | 0.1982 | 0.2018 | 63720 | 32210 | 4070 | 64281 | 31789 | 3930 | 280.05  | 368.47  |
| 100000 | 1.11 | 0.8000 | 0.2000 | 64000 | 35520 | 4000 | 115.47 | 0.7982 | 0.8018 | 0.1982 | 0.2018 | 63720 | 32210 | 4070 | 64281 | 31789 | 3930 | 342.65  | 440.36  |
| 100000 | 1.12 | 0.8000 | 0.2000 | 64000 | 35840 | 4000 | 136.59 | 0.7982 | 0.8018 | 0.1982 | 0.2018 | 63720 | 32210 | 4070 | 64281 | 31789 | 3930 | 411.60  | 518.70  |
| 100000 | 1.13 | 0.8000 | 0.2000 | 64000 | 36160 | 4000 | 159.35 | 0.7982 | 0.8018 | 0.1982 | 0.2018 | 63720 | 32210 | 4070 | 64281 | 31789 | 3930 | 486.91  | 603.48  |
| 100000 | 1.14 | 0.8000 | 0.2000 | 64000 | 36480 | 4000 | 183.72 | 0.7982 | 0.8018 | 0.1982 | 0.2018 | 63720 | 32210 | 4070 | 64281 | 31789 | 3930 | 568.58  | 694.70  |
| 100000 | 1.15 | 0.8000 | 0.2000 | 64000 | 36800 | 4000 | 209.68 | 0.7982 | 0.8018 | 0.1982 | 0.2018 | 63720 | 32210 | 4070 | 64281 | 31789 | 3930 | 656.61  | 792.36  |
| 100000 | 1.16 | 0.8000 | 0.2000 | 64000 | 37120 | 4000 | 237.19 | 0.7982 | 0.8018 | 0.1982 | 0.2018 | 63720 | 32210 | 4070 | 64281 | 31789 | 3930 | 751.00  | 896.47  |
| 100000 | 1.17 | 0.8000 | 0.2000 | 64000 | 37440 | 4000 | 266.23 | 0.7982 | 0.8018 | 0.1982 | 0.2018 | 63720 | 32210 | 4070 | 64281 | 31789 | 3930 | 851.74  | 1007.02 |
| 100000 | 1.18 | 0.8000 | 0.2000 | 64000 | 37760 | 4000 | 296.79 | 0.7982 | 0.8018 | 0.1982 | 0.2018 | 63720 | 32210 | 4070 | 64281 | 31789 | 3930 | 958.84  | 1124.01 |
| 100000 | 1.19 | 0.8000 | 0.2000 | 64000 | 38080 | 4000 | 328.83 | 0.7982 | 0.8018 | 0.1982 | 0.2018 | 63720 | 32210 | 4070 | 64281 | 31789 | 3930 | 1072.31 | 1247.44 |
| 100000 | 1.20 | 0.8000 | 0.2000 | 64000 | 38400 | 4000 | 362.33 | 0.7982 | 0.8018 | 0.1982 | 0.2018 | 63720 | 32210 | 4070 | 64281 | 31789 | 3930 | 1192.13 | 1377.32 |
| 100000 | 0.80 | 0.8500 | 0.1500 | 72250 | 20400 | 2250 | 308.46 | 0.8484 | 0.8516 | 0.1484 | 0.1516 | 71984 | 25719 | 2297 | 72516 | 25280 | 2203 | 1101.84 | 944.14  |
| 100000 | 0.81 | 0.8500 | 0.1500 | 72250 | 20655 | 2250 | 275.69 | 0.8484 | 0.8516 | 0.1484 | 0.1516 | 71984 | 25719 | 2297 | 72516 | 25280 | 2203 | 998.90  | 848.26  |
| 100000 | 0.82 | 0.8500 | 0.1500 | 72250 | 20910 | 2250 | 245.08 | 0.8484 | 0.8516 | 0.1484 | 0.1516 | 71984 | 25719 | 2297 | 72516 | 25280 | 2203 | 901.01  | 757.52  |
| 100000 | 0.83 | 0.8500 | 0.1500 | 72250 | 21165 | 2250 | 216.56 | 0.8484 | 0.8516 | 0.1484 | 0.1516 | 71984 | 25719 | 2297 | 72516 | 25280 | 2203 | 808.19  | 671.92  |
| 100000 | 0.84 | 0.8500 | 0.1500 | 72250 | 21420 | 2250 | 190.05 | 0.8484 | 0.8516 | 0.1484 | 0.1516 | 71984 | 25719 | 2297 | 72516 | 25280 | 2203 | 720.42  | 591.47  |
| 100000 | 0.85 | 0.8500 | 0.1500 | 72250 | 21675 | 2250 | 165.52 | 0.8484 | 0.8516 | 0.1484 | 0.1516 | 71984 | 25719 | 2297 | 72516 | 25280 | 2203 | 637.71  | 516.16  |
| 100000 | 0.86 | 0.8500 | 0.1500 | 72250 | 21930 | 2250 | 142.89 | 0.8484 | 0.8516 | 0.1484 | 0.1516 | 71984 | 25719 | 2297 | 72516 | 25280 | 2203 | 560.05  | 446.00  |
| 100000 | 0.87 | 0.8500 | 0.1500 | 72250 | 22185 | 2250 | 122.11 | 0.8484 | 0.8516 | 0.1484 | 0.1516 | 71984 | 25719 | 2297 | 72516 | 25280 | 2203 | 487.45  | 380.98  |
| 100000 | 0.88 | 0.8500 | 0.1500 | 72250 | 22440 | 2250 | 103.14 | 0.8484 | 0.8516 | 0.1484 | 0.1516 | 71984 | 25719 | 2297 | 72516 | 25280 | 2203 | 419.91  | 321.11  |
| 100000 | 0.89 | 0.8500 | 0.1500 | 72250 | 22695 | 2250 | 85.92  | 0.8484 | 0.8516 | 0.1484 | 0.1516 | 71984 | 25719 | 2297 | 72516 | 25280 | 2203 | 357.42  | 266.38  |
| 100000 | 0.90 | 0.8500 | 0.1500 | 72250 | 22950 | 2250 | 70.40  | 0.8484 | 0.8516 | 0.1484 | 0.1516 | 71984 | 25719 | 2297 | 72516 | 25280 | 2203 | 299.99  | 216.79  |

|        |      |        |        |       |       |      |        |        |        |        |        |       |       |      |       |       |      |        |         |
|--------|------|--------|--------|-------|-------|------|--------|--------|--------|--------|--------|-------|-------|------|-------|-------|------|--------|---------|
| 100000 | 0.91 | 0.8500 | 0.1500 | 72250 | 23205 | 2250 | 56.55  | 0.8484 | 0.8516 | 0.1484 | 0.1516 | 71984 | 25719 | 2297 | 72516 | 25280 | 2203 | 247.62 | 172.35  |
| 100000 | 0.92 | 0.8500 | 0.1500 | 72250 | 23460 | 2250 | 44.31  | 0.8484 | 0.8516 | 0.1484 | 0.1516 | 71984 | 25719 | 2297 | 72516 | 25280 | 2203 | 200.30 | 133.05  |
| 100000 | 0.93 | 0.8500 | 0.1500 | 72250 | 23715 | 2250 | 33.65  | 0.8484 | 0.8516 | 0.1484 | 0.1516 | 71984 | 25719 | 2297 | 72516 | 25280 | 2203 | 158.04 | 98.90   |
| 100000 | 0.94 | 0.8500 | 0.1500 | 72250 | 23970 | 2250 | 24.52  | 0.8484 | 0.8516 | 0.1484 | 0.1516 | 71984 | 25719 | 2297 | 72516 | 25280 | 2203 | 120.84 | 69.89   |
| 100000 | 0.95 | 0.8500 | 0.1500 | 72250 | 24225 | 2250 | 16.89  | 0.8484 | 0.8516 | 0.1484 | 0.1516 | 71984 | 25719 | 2297 | 72516 | 25280 | 2203 | 88.69  | 46.03   |
| 100000 | 0.96 | 0.8500 | 0.1500 | 72250 | 24480 | 2250 | 10.73  | 0.8484 | 0.8516 | 0.1484 | 0.1516 | 71984 | 25719 | 2297 | 72516 | 25280 | 2203 | 61.60  | 27.31   |
| 100000 | 0.97 | 0.8500 | 0.1500 | 72250 | 24735 | 2250 | 5.99   | 0.8484 | 0.8516 | 0.1484 | 0.1516 | 71984 | 25719 | 2297 | 72516 | 25280 | 2203 | 39.57  | 13.74   |
| 100000 | 0.98 | 0.8500 | 0.1500 | 72250 | 24990 | 2250 | 2.64   | 0.8484 | 0.8516 | 0.1484 | 0.1516 | 71984 | 25719 | 2297 | 72516 | 25280 | 2203 | 22.59  | 5.30    |
| 100000 | 0.99 | 0.8500 | 0.1500 | 72250 | 25245 | 2250 | 0.66   | 0.8484 | 0.8516 | 0.1484 | 0.1516 | 71984 | 25719 | 2297 | 72516 | 25280 | 2203 | 10.67  | 2.02    |
| 100000 | 1.00 | 0.8500 | 0.1500 | 72250 | 25500 | 2250 | 0.00   | 0.8484 | 0.8516 | 0.1484 | 0.1516 | 71984 | 25719 | 2297 | 72516 | 25280 | 2203 | 3.81   | 3.88    |
| 100000 | 1.01 | 0.8500 | 0.1500 | 72250 | 25755 | 2250 | 0.65   | 0.8484 | 0.8516 | 0.1484 | 0.1516 | 71984 | 25719 | 2297 | 72516 | 25280 | 2203 | 2.00   | 10.88   |
| 100000 | 1.02 | 0.8500 | 0.1500 | 72250 | 26010 | 2250 | 2.56   | 0.8484 | 0.8516 | 0.1484 | 0.1516 | 71984 | 25719 | 2297 | 72516 | 25280 | 2203 | 5.25   | 23.02   |
| 100000 | 1.03 | 0.8500 | 0.1500 | 72250 | 26265 | 2250 | 5.73   | 0.8484 | 0.8516 | 0.1484 | 0.1516 | 71984 | 25719 | 2297 | 72516 | 25280 | 2203 | 13.56  | 40.31   |
| 100000 | 1.04 | 0.8500 | 0.1500 | 72250 | 26520 | 2250 | 10.11  | 0.8484 | 0.8516 | 0.1484 | 0.1516 | 71984 | 25719 | 2297 | 72516 | 25280 | 2203 | 26.92  | 62.75   |
| 100000 | 1.05 | 0.8500 | 0.1500 | 72250 | 26775 | 2250 | 15.68  | 0.8484 | 0.8516 | 0.1484 | 0.1516 | 71984 | 25719 | 2297 | 72516 | 25280 | 2203 | 45.34  | 90.33   |
| 100000 | 1.06 | 0.8500 | 0.1500 | 72250 | 27030 | 2250 | 22.42  | 0.8484 | 0.8516 | 0.1484 | 0.1516 | 71984 | 25719 | 2297 | 72516 | 25280 | 2203 | 68.82  | 123.05  |
| 100000 | 1.07 | 0.8500 | 0.1500 | 72250 | 27285 | 2250 | 30.31  | 0.8484 | 0.8516 | 0.1484 | 0.1516 | 71984 | 25719 | 2297 | 72516 | 25280 | 2203 | 97.35  | 160.92  |
| 100000 | 1.08 | 0.8500 | 0.1500 | 72250 | 27540 | 2250 | 39.32  | 0.8484 | 0.8516 | 0.1484 | 0.1516 | 71984 | 25719 | 2297 | 72516 | 25280 | 2203 | 130.94 | 203.93  |
| 100000 | 1.09 | 0.8500 | 0.1500 | 72250 | 27795 | 2250 | 49.43  | 0.8484 | 0.8516 | 0.1484 | 0.1516 | 71984 | 25719 | 2297 | 72516 | 25280 | 2203 | 169.59 | 252.09  |
| 100000 | 1.10 | 0.8500 | 0.1500 | 72250 | 28050 | 2250 | 60.62  | 0.8484 | 0.8516 | 0.1484 | 0.1516 | 71984 | 25719 | 2297 | 72516 | 25280 | 2203 | 213.29 | 305.39  |
| 100000 | 1.11 | 0.8500 | 0.1500 | 72250 | 28305 | 2250 | 72.87  | 0.8484 | 0.8516 | 0.1484 | 0.1516 | 71984 | 25719 | 2297 | 72516 | 25280 | 2203 | 262.05 | 363.83  |
| 100000 | 1.12 | 0.8500 | 0.1500 | 72250 | 28560 | 2250 | 86.16  | 0.8484 | 0.8516 | 0.1484 | 0.1516 | 71984 | 25719 | 2297 | 72516 | 25280 | 2203 | 315.87 | 427.42  |
| 100000 | 1.13 | 0.8500 | 0.1500 | 72250 | 28815 | 2250 | 100.47 | 0.8484 | 0.8516 | 0.1484 | 0.1516 | 71984 | 25719 | 2297 | 72516 | 25280 | 2203 | 374.74 | 496.15  |
| 100000 | 1.14 | 0.8500 | 0.1500 | 72250 | 29070 | 2250 | 115.78 | 0.8484 | 0.8516 | 0.1484 | 0.1516 | 71984 | 25719 | 2297 | 72516 | 25280 | 2203 | 438.67 | 570.03  |
| 100000 | 1.15 | 0.8500 | 0.1500 | 72250 | 29325 | 2250 | 132.08 | 0.8484 | 0.8516 | 0.1484 | 0.1516 | 71984 | 25719 | 2297 | 72516 | 25280 | 2203 | 507.66 | 649.05  |
| 100000 | 1.16 | 0.8500 | 0.1500 | 72250 | 29580 | 2250 | 149.34 | 0.8484 | 0.8516 | 0.1484 | 0.1516 | 71984 | 25719 | 2297 | 72516 | 25280 | 2203 | 581.70 | 733.22  |
| 100000 | 1.17 | 0.8500 | 0.1500 | 72250 | 29835 | 2250 | 167.56 | 0.8484 | 0.8516 | 0.1484 | 0.1516 | 71984 | 25719 | 2297 | 72516 | 25280 | 2203 | 660.80 | 822.53  |
| 100000 | 1.18 | 0.8500 | 0.1500 | 72250 | 30090 | 2250 | 186.71 | 0.8484 | 0.8516 | 0.1484 | 0.1516 | 71984 | 25719 | 2297 | 72516 | 25280 | 2203 | 744.96 | 916.99  |
| 100000 | 1.19 | 0.8500 | 0.1500 | 72250 | 30345 | 2250 | 206.78 | 0.8484 | 0.8516 | 0.1484 | 0.1516 | 71984 | 25719 | 2297 | 72516 | 25280 | 2203 | 834.17 | 1016.59 |
| 100000 | 1.20 | 0.8500 | 0.1500 | 72250 | 30600 | 2250 | 227.76 | 0.8484 | 0.8516 | 0.1484 | 0.1516 | 71984 | 25719 | 2297 | 72516 | 25280 | 2203 | 928.44 | 1121.33 |
| 100000 | 0.80 | 0.9000 | 0.1000 | 81000 | 14400 | 1000 | 156.71 | 0.8987 | 0.9013 | 0.0987 | 0.1013 | 80764 | 18210 | 1026 | 81237 | 17789 | 974  | 798.53 | 647.13  |
| 100000 | 0.81 | 0.9000 | 0.1000 | 81000 | 14580 | 1000 | 139.89 | 0.8987 | 0.9013 | 0.0987 | 0.1013 | 80764 | 18210 | 1026 | 81237 | 17789 | 974  | 724.99 | 580.36  |
| 100000 | 0.82 | 0.9000 | 0.1000 | 81000 | 14760 | 1000 | 124.21 | 0.8987 | 0.9013 | 0.0987 | 0.1013 | 80764 | 18210 | 1026 | 81237 | 17789 | 974  | 655.01 | 517.24  |
| 100000 | 0.83 | 0.9000 | 0.1000 | 81000 | 14940 | 1000 | 109.63 | 0.8987 | 0.9013 | 0.0987 | 0.1013 | 80764 | 18210 | 1026 | 81237 | 17789 | 974  | 588.58 | 457.76  |
| 100000 | 0.84 | 0.9000 | 0.1000 | 81000 | 15120 | 1000 | 96.10  | 0.8987 | 0.9013 | 0.0987 | 0.1013 | 80764 | 18210 | 1026 | 81237 | 17789 | 974  | 525.72 | 401.92  |

|        |      |        |        |       |       |      |        |        |        |        |        |       |       |      |       |       |     |        |        |
|--------|------|--------|--------|-------|-------|------|--------|--------|--------|--------|--------|-------|-------|------|-------|-------|-----|--------|--------|
| 100000 | 0.85 | 0.9000 | 0.1000 | 81000 | 15300 | 1000 | 83.60  | 0.8987 | 0.9013 | 0.0987 | 0.1013 | 80764 | 18210 | 1026 | 81237 | 17789 | 974 | 466.41 | 349.72 |
| 100000 | 0.86 | 0.9000 | 0.1000 | 81000 | 15480 | 1000 | 72.10  | 0.8987 | 0.9013 | 0.0987 | 0.1013 | 80764 | 18210 | 1026 | 81237 | 17789 | 974 | 410.66 | 301.17 |
| 100000 | 0.87 | 0.9000 | 0.1000 | 81000 | 15660 | 1000 | 61.55  | 0.8987 | 0.9013 | 0.0987 | 0.1013 | 80764 | 18210 | 1026 | 81237 | 17789 | 974 | 358.47 | 256.26 |
| 100000 | 0.88 | 0.9000 | 0.1000 | 81000 | 15840 | 1000 | 51.93  | 0.8987 | 0.9013 | 0.0987 | 0.1013 | 80764 | 18210 | 1026 | 81237 | 17789 | 974 | 309.83 | 214.99 |
| 100000 | 0.89 | 0.9000 | 0.1000 | 81000 | 16020 | 1000 | 43.22  | 0.8987 | 0.9013 | 0.0987 | 0.1013 | 80764 | 18210 | 1026 | 81237 | 17789 | 974 | 264.76 | 177.36 |
| 100000 | 0.90 | 0.9000 | 0.1000 | 81000 | 16200 | 1000 | 35.38  | 0.8987 | 0.9013 | 0.0987 | 0.1013 | 80764 | 18210 | 1026 | 81237 | 17789 | 974 | 223.24 | 143.38 |
| 100000 | 0.91 | 0.9000 | 0.1000 | 81000 | 16380 | 1000 | 28.39  | 0.8987 | 0.9013 | 0.0987 | 0.1013 | 80764 | 18210 | 1026 | 81237 | 17789 | 974 | 185.28 | 113.04 |
| 100000 | 0.92 | 0.9000 | 0.1000 | 81000 | 16560 | 1000 | 22.23  | 0.8987 | 0.9013 | 0.0987 | 0.1013 | 80764 | 18210 | 1026 | 81237 | 17789 | 974 | 150.88 | 86.34  |
| 100000 | 0.93 | 0.9000 | 0.1000 | 81000 | 16740 | 1000 | 16.86  | 0.8987 | 0.9013 | 0.0987 | 0.1013 | 80764 | 18210 | 1026 | 81237 | 17789 | 974 | 120.04 | 63.28  |
| 100000 | 0.94 | 0.9000 | 0.1000 | 81000 | 16920 | 1000 | 12.28  | 0.8987 | 0.9013 | 0.0987 | 0.1013 | 80764 | 18210 | 1026 | 81237 | 17789 | 974 | 92.76  | 43.87  |
| 100000 | 0.95 | 0.9000 | 0.1000 | 81000 | 17100 | 1000 | 8.45   | 0.8987 | 0.9013 | 0.0987 | 0.1013 | 80764 | 18210 | 1026 | 81237 | 17789 | 974 | 69.04  | 28.10  |
| 100000 | 0.96 | 0.9000 | 0.1000 | 81000 | 17280 | 1000 | 5.36   | 0.8987 | 0.9013 | 0.0987 | 0.1013 | 80764 | 18210 | 1026 | 81237 | 17789 | 974 | 48.87  | 15.97  |
| 100000 | 0.97 | 0.9000 | 0.1000 | 81000 | 17460 | 1000 | 2.99   | 0.8987 | 0.9013 | 0.0987 | 0.1013 | 80764 | 18210 | 1026 | 81237 | 17789 | 974 | 32.27  | 7.49   |
| 100000 | 0.98 | 0.9000 | 0.1000 | 81000 | 17640 | 1000 | 1.32   | 0.8987 | 0.9013 | 0.0987 | 0.1013 | 80764 | 18210 | 1026 | 81237 | 17789 | 974 | 19.22  | 2.64   |
| 100000 | 0.99 | 0.9000 | 0.1000 | 81000 | 17820 | 1000 | 0.33   | 0.8987 | 0.9013 | 0.0987 | 0.1013 | 80764 | 18210 | 1026 | 81237 | 17789 | 974 | 9.73   | 1.44   |
| 100000 | 1.00 | 0.9000 | 0.1000 | 81000 | 18000 | 1000 | 0.00   | 0.8987 | 0.9013 | 0.0987 | 0.1013 | 80764 | 18210 | 1026 | 81237 | 17789 | 974 | 3.80   | 3.89   |
| 100000 | 1.01 | 0.9000 | 0.1000 | 81000 | 18180 | 1000 | 0.32   | 0.8987 | 0.9013 | 0.0987 | 0.1013 | 80764 | 18210 | 1026 | 81237 | 17789 | 974 | 1.42   | 9.97   |
| 100000 | 1.02 | 0.9000 | 0.1000 | 81000 | 18360 | 1000 | 1.28   | 0.8987 | 0.9013 | 0.0987 | 0.1013 | 80764 | 18210 | 1026 | 81237 | 17789 | 974 | 2.61   | 19.70  |
| 100000 | 1.03 | 0.9000 | 0.1000 | 81000 | 18540 | 1000 | 2.85   | 0.8987 | 0.9013 | 0.0987 | 0.1013 | 80764 | 18210 | 1026 | 81237 | 17789 | 974 | 7.35   | 33.07  |
| 100000 | 1.04 | 0.9000 | 0.1000 | 81000 | 18720 | 1000 | 5.02   | 0.8987 | 0.9013 | 0.0987 | 0.1013 | 80764 | 18210 | 1026 | 81237 | 17789 | 974 | 15.66  | 50.09  |
| 100000 | 1.05 | 0.9000 | 0.1000 | 81000 | 18900 | 1000 | 7.79   | 0.8987 | 0.9013 | 0.0987 | 0.1013 | 80764 | 18210 | 1026 | 81237 | 17789 | 974 | 27.52  | 70.74  |
| 100000 | 1.06 | 0.9000 | 0.1000 | 81000 | 19080 | 1000 | 11.13  | 0.8987 | 0.9013 | 0.0987 | 0.1013 | 80764 | 18210 | 1026 | 81237 | 17789 | 974 | 42.94  | 95.04  |
| 100000 | 1.07 | 0.9000 | 0.1000 | 81000 | 19260 | 1000 | 15.03  | 0.8987 | 0.9013 | 0.0987 | 0.1013 | 80764 | 18210 | 1026 | 81237 | 17789 | 974 | 61.92  | 122.98 |
| 100000 | 1.08 | 0.9000 | 0.1000 | 81000 | 19440 | 1000 | 19.48  | 0.8987 | 0.9013 | 0.0987 | 0.1013 | 80764 | 18210 | 1026 | 81237 | 17789 | 974 | 84.45  | 154.57 |
| 100000 | 1.09 | 0.9000 | 0.1000 | 81000 | 19620 | 1000 | 24.48  | 0.8987 | 0.9013 | 0.0987 | 0.1013 | 80764 | 18210 | 1026 | 81237 | 17789 | 974 | 110.55 | 189.79 |
| 100000 | 1.10 | 0.9000 | 0.1000 | 81000 | 19800 | 1000 | 30.00  | 0.8987 | 0.9013 | 0.0987 | 0.1013 | 80764 | 18210 | 1026 | 81237 | 17789 | 974 | 140.20 | 228.66 |
| 100000 | 1.11 | 0.9000 | 0.1000 | 81000 | 19980 | 1000 | 36.05  | 0.8987 | 0.9013 | 0.0987 | 0.1013 | 80764 | 18210 | 1026 | 81237 | 17789 | 974 | 173.41 | 271.17 |
| 100000 | 1.12 | 0.9000 | 0.1000 | 81000 | 20160 | 1000 | 42.60  | 0.8987 | 0.9013 | 0.0987 | 0.1013 | 80764 | 18210 | 1026 | 81237 | 17789 | 974 | 210.18 | 317.33 |
| 100000 | 1.13 | 0.9000 | 0.1000 | 81000 | 20340 | 1000 | 49.64  | 0.8987 | 0.9013 | 0.0987 | 0.1013 | 80764 | 18210 | 1026 | 81237 | 17789 | 974 | 250.51 | 367.13 |
| 100000 | 1.14 | 0.9000 | 0.1000 | 81000 | 20520 | 1000 | 57.18  | 0.8987 | 0.9013 | 0.0987 | 0.1013 | 80764 | 18210 | 1026 | 81237 | 17789 | 974 | 294.40 | 420.57 |
| 100000 | 1.15 | 0.9000 | 0.1000 | 81000 | 20700 | 1000 | 65.19  | 0.8987 | 0.9013 | 0.0987 | 0.1013 | 80764 | 18210 | 1026 | 81237 | 17789 | 974 | 341.85 | 477.65 |
| 100000 | 1.16 | 0.9000 | 0.1000 | 81000 | 20880 | 1000 | 73.68  | 0.8987 | 0.9013 | 0.0987 | 0.1013 | 80764 | 18210 | 1026 | 81237 | 17789 | 974 | 392.85 | 538.37 |
| 100000 | 1.17 | 0.9000 | 0.1000 | 81000 | 21060 | 1000 | 82.62  | 0.8987 | 0.9013 | 0.0987 | 0.1013 | 80764 | 18210 | 1026 | 81237 | 17789 | 974 | 447.41 | 602.74 |
| 100000 | 1.18 | 0.9000 | 0.1000 | 81000 | 21240 | 1000 | 92.02  | 0.8987 | 0.9013 | 0.0987 | 0.1013 | 80764 | 18210 | 1026 | 81237 | 17789 | 974 | 505.53 | 670.75 |
| 100000 | 1.19 | 0.9000 | 0.1000 | 81000 | 21420 | 1000 | 101.86 | 0.8987 | 0.9013 | 0.0987 | 0.1013 | 80764 | 18210 | 1026 | 81237 | 17789 | 974 | 567.21 | 742.40 |

|        |      |        |        |       |       |      |        |        |        |        |        |       |       |      |       |       |     |        |        |
|--------|------|--------|--------|-------|-------|------|--------|--------|--------|--------|--------|-------|-------|------|-------|-------|-----|--------|--------|
| 100000 | 1.20 | 0.9000 | 0.1000 | 81000 | 21600 | 1000 | 112.15 | 0.8987 | 0.9013 | 0.0987 | 0.1013 | 80764 | 18210 | 1026 | 81237 | 17789 | 974 | 632.45 | 817.70 |
| 100000 | 0.80 | 0.9500 | 0.0500 | 90250 | 7600  | 250  | 44.61  | 0.9490 | 0.9510 | 0.0490 | 0.0510 | 90069 | 9672  | 260  | 90432 | 9328  | 241 | 444.51 | 320.81 |
| 100000 | 0.81 | 0.9500 | 0.0500 | 90250 | 7695  | 250  | 39.77  | 0.9490 | 0.9510 | 0.0490 | 0.0510 | 90069 | 9672  | 260  | 90432 | 9328  | 241 | 404.74 | 286.58 |
| 100000 | 0.82 | 0.9500 | 0.0500 | 90250 | 7790  | 250  | 35.26  | 0.9490 | 0.9510 | 0.0490 | 0.0510 | 90069 | 9672  | 260  | 90432 | 9328  | 241 | 366.84 | 254.29 |
| 100000 | 0.83 | 0.9500 | 0.0500 | 90250 | 7885  | 250  | 31.08  | 0.9490 | 0.9510 | 0.0490 | 0.0510 | 90069 | 9672  | 260  | 90432 | 9328  | 241 | 330.81 | 223.93 |
| 100000 | 0.84 | 0.9500 | 0.0500 | 90250 | 7980  | 250  | 27.21  | 0.9490 | 0.9510 | 0.0490 | 0.0510 | 90069 | 9672  | 260  | 90432 | 9328  | 241 | 296.64 | 195.51 |
| 100000 | 0.85 | 0.9500 | 0.0500 | 90250 | 8075  | 250  | 23.65  | 0.9490 | 0.9510 | 0.0490 | 0.0510 | 90069 | 9672  | 260  | 90432 | 9328  | 241 | 264.34 | 169.02 |
| 100000 | 0.86 | 0.9500 | 0.0500 | 90250 | 8170  | 250  | 20.37  | 0.9490 | 0.9510 | 0.0490 | 0.0510 | 90069 | 9672  | 260  | 90432 | 9328  | 241 | 233.90 | 144.47 |
| 100000 | 0.87 | 0.9500 | 0.0500 | 90250 | 8265  | 250  | 17.37  | 0.9490 | 0.9510 | 0.0490 | 0.0510 | 90069 | 9672  | 260  | 90432 | 9328  | 241 | 205.33 | 121.85 |
| 100000 | 0.88 | 0.9500 | 0.0500 | 90250 | 8360  | 250  | 14.64  | 0.9490 | 0.9510 | 0.0490 | 0.0510 | 90069 | 9672  | 260  | 90432 | 9328  | 241 | 178.63 | 101.17 |
| 100000 | 0.89 | 0.9500 | 0.0500 | 90250 | 8455  | 250  | 12.17  | 0.9490 | 0.9510 | 0.0490 | 0.0510 | 90069 | 9672  | 260  | 90432 | 9328  | 241 | 153.80 | 82.42  |
| 100000 | 0.90 | 0.9500 | 0.0500 | 90250 | 8550  | 250  | 9.95   | 0.9490 | 0.9510 | 0.0490 | 0.0510 | 90069 | 9672  | 260  | 90432 | 9328  | 241 | 130.83 | 65.61  |
| 100000 | 0.91 | 0.9500 | 0.0500 | 90250 | 8645  | 250  | 7.98   | 0.9490 | 0.9510 | 0.0490 | 0.0510 | 90069 | 9672  | 260  | 90432 | 9328  | 241 | 109.72 | 50.73  |
| 100000 | 0.92 | 0.9500 | 0.0500 | 90250 | 8740  | 250  | 6.24   | 0.9490 | 0.9510 | 0.0490 | 0.0510 | 90069 | 9672  | 260  | 90432 | 9328  | 241 | 90.49  | 37.79  |
| 100000 | 0.93 | 0.9500 | 0.0500 | 90250 | 8835  | 250  | 4.73   | 0.9490 | 0.9510 | 0.0490 | 0.0510 | 90069 | 9672  | 260  | 90432 | 9328  | 241 | 73.11  | 26.78  |
| 100000 | 0.94 | 0.9500 | 0.0500 | 90250 | 8930  | 250  | 3.44   | 0.9490 | 0.9510 | 0.0490 | 0.0510 | 90069 | 9672  | 260  | 90432 | 9328  | 241 | 57.61  | 17.71  |
| 100000 | 0.95 | 0.9500 | 0.0500 | 90250 | 9025  | 250  | 2.36   | 0.9490 | 0.9510 | 0.0490 | 0.0510 | 90069 | 9672  | 260  | 90432 | 9328  | 241 | 43.97  | 10.57  |
| 100000 | 0.96 | 0.9500 | 0.0500 | 90250 | 9120  | 250  | 1.50   | 0.9490 | 0.9510 | 0.0490 | 0.0510 | 90069 | 9672  | 260  | 90432 | 9328  | 241 | 32.20  | 5.37   |
| 100000 | 0.97 | 0.9500 | 0.0500 | 90250 | 9215  | 250  | 0.84   | 0.9490 | 0.9510 | 0.0490 | 0.0510 | 90069 | 9672  | 260  | 90432 | 9328  | 241 | 22.29  | 2.10   |
| 100000 | 0.98 | 0.9500 | 0.0500 | 90250 | 9310  | 250  | 0.37   | 0.9490 | 0.9510 | 0.0490 | 0.0510 | 90069 | 9672  | 260  | 90432 | 9328  | 241 | 14.25  | .77    |
| 100000 | 0.99 | 0.9500 | 0.0500 | 90250 | 9405  | 250  | 0.09   | 0.9490 | 0.9510 | 0.0490 | 0.0510 | 90069 | 9672  | 260  | 90432 | 9328  | 241 | 8.08   | 1.37   |
| 100000 | 1.00 | 0.9500 | 0.0500 | 90250 | 9500  | 250  | 0.00   | 0.9490 | 0.9510 | 0.0490 | 0.0510 | 90069 | 9672  | 260  | 90432 | 9328  | 241 | 3.77   | 3.91   |
| 100000 | 1.01 | 0.9500 | 0.0500 | 90250 | 9595  | 250  | 0.09   | 0.9490 | 0.9510 | 0.0490 | 0.0510 | 90069 | 9672  | 260  | 90432 | 9328  | 241 | 1.33   | 8.39   |
| 100000 | 1.02 | 0.9500 | 0.0500 | 90250 | 9690  | 250  | 0.35   | 0.9490 | 0.9510 | 0.0490 | 0.0510 | 90069 | 9672  | 260  | 90432 | 9328  | 241 | .76    | 14.79  |
| 100000 | 1.03 | 0.9500 | 0.0500 | 90250 | 9785  | 250  | 0.79   | 0.9490 | 0.9510 | 0.0490 | 0.0510 | 90069 | 9672  | 260  | 90432 | 9328  | 241 | 2.05   | 23.14  |
| 100000 | 1.04 | 0.9500 | 0.0500 | 90250 | 9880  | 250  | 1.39   | 0.9490 | 0.9510 | 0.0490 | 0.0510 | 90069 | 9672  | 260  | 90432 | 9328  | 241 | 5.21   | 33.42  |
| 100000 | 1.05 | 0.9500 | 0.0500 | 90250 | 9975  | 250  | 2.16   | 0.9490 | 0.9510 | 0.0490 | 0.0510 | 90069 | 9672  | 260  | 90432 | 9328  | 241 | 10.23  | 45.63  |
| 100000 | 1.06 | 0.9500 | 0.0500 | 90250 | 10070 | 250  | 3.08   | 0.9490 | 0.9510 | 0.0490 | 0.0510 | 90069 | 9672  | 260  | 90432 | 9328  | 241 | 17.12  | 59.78  |
| 100000 | 1.07 | 0.9500 | 0.0500 | 90250 | 10165 | 250  | 4.16   | 0.9490 | 0.9510 | 0.0490 | 0.0510 | 90069 | 9672  | 260  | 90432 | 9328  | 241 | 25.88  | 75.86  |
| 100000 | 1.08 | 0.9500 | 0.0500 | 90250 | 10260 | 250  | 5.39   | 0.9490 | 0.9510 | 0.0490 | 0.0510 | 90069 | 9672  | 260  | 90432 | 9328  | 241 | 36.50  | 93.88  |
| 100000 | 1.09 | 0.9500 | 0.0500 | 90250 | 10355 | 250  | 6.77   | 0.9490 | 0.9510 | 0.0490 | 0.0510 | 90069 | 9672  | 260  | 90432 | 9328  | 241 | 48.99  | 113.83 |
| 100000 | 1.10 | 0.9500 | 0.0500 | 90250 | 10450 | 250  | 8.29   | 0.9490 | 0.9510 | 0.0490 | 0.0510 | 90069 | 9672  | 260  | 90432 | 9328  | 241 | 63.35  | 135.72 |
| 100000 | 1.11 | 0.9500 | 0.0500 | 90250 | 10545 | 250  | 9.96   | 0.9490 | 0.9510 | 0.0490 | 0.0510 | 90069 | 9672  | 260  | 90432 | 9328  | 241 | 79.57  | 159.55 |
| 100000 | 1.12 | 0.9500 | 0.0500 | 90250 | 10640 | 250  | 11.76  | 0.9490 | 0.9510 | 0.0490 | 0.0510 | 90069 | 9672  | 260  | 90432 | 9328  | 241 | 97.66  | 185.31 |
| 100000 | 1.13 | 0.9500 | 0.0500 | 90250 | 10735 | 250  | 13.70  | 0.9490 | 0.9510 | 0.0490 | 0.0510 | 90069 | 9672  | 260  | 90432 | 9328  | 241 | 117.61 | 213.00 |



|        |      |        |        |        |   |   |       |        |        |        |        |        |   |   |        |   |   |   |   |
|--------|------|--------|--------|--------|---|---|-------|--------|--------|--------|--------|--------|---|---|--------|---|---|---|---|
| 100000 | 1.08 | 1.0000 | 0.0000 | 100000 | 0 | 0 | 30.81 | 1.0000 | 1.0000 | 0.0000 | 0.0000 | 100000 | 0 | 0 | 100000 | 0 | 0 | . | . |
| 100000 | 1.09 | 1.0000 | 0.0000 | 100000 | 0 | 0 | 30.81 | 1.0000 | 1.0000 | 0.0000 | 0.0000 | 100000 | 0 | 0 | 100000 | 0 | 0 | . | . |
| 100000 | 1.10 | 1.0000 | 0.0000 | 100000 | 0 | 0 | 30.81 | 1.0000 | 1.0000 | 0.0000 | 0.0000 | 100000 | 0 | 0 | 100000 | 0 | 0 | . | . |
| 100000 | 1.11 | 1.0000 | 0.0000 | 100000 | 0 | 0 | 30.81 | 1.0000 | 1.0000 | 0.0000 | 0.0000 | 100000 | 0 | 0 | 100000 | 0 | 0 | . | . |
| 100000 | 1.12 | 1.0000 | 0.0000 | 100000 | 0 | 0 | 30.81 | 1.0000 | 1.0000 | 0.0000 | 0.0000 | 100000 | 0 | 0 | 100000 | 0 | 0 | . | . |
| 100000 | 1.13 | 1.0000 | 0.0000 | 100000 | 0 | 0 | 30.81 | 1.0000 | 1.0000 | 0.0000 | 0.0000 | 100000 | 0 | 0 | 100000 | 0 | 0 | . | . |
| 100000 | 1.14 | 1.0000 | 0.0000 | 100000 | 0 | 0 | 30.81 | 1.0000 | 1.0000 | 0.0000 | 0.0000 | 100000 | 0 | 0 | 100000 | 0 | 0 | . | . |
| 100000 | 1.15 | 1.0000 | 0.0000 | 100000 | 0 | 0 | 30.81 | 1.0000 | 1.0000 | 0.0000 | 0.0000 | 100000 | 0 | 0 | 100000 | 0 | 0 | . | . |
| 100000 | 1.16 | 1.0000 | 0.0000 | 100000 | 0 | 0 | 30.81 | 1.0000 | 1.0000 | 0.0000 | 0.0000 | 100000 | 0 | 0 | 100000 | 0 | 0 | . | . |
| 100000 | 1.17 | 1.0000 | 0.0000 | 100000 | 0 | 0 | 30.81 | 1.0000 | 1.0000 | 0.0000 | 0.0000 | 100000 | 0 | 0 | 100000 | 0 | 0 | . | . |
| 100000 | 1.18 | 1.0000 | 0.0000 | 100000 | 0 | 0 | 30.81 | 1.0000 | 1.0000 | 0.0000 | 0.0000 | 100000 | 0 | 0 | 100000 | 0 | 0 | . | . |
| 100000 | 1.19 | 1.0000 | 0.0000 | 100000 | 0 | 0 | 30.81 | 1.0000 | 1.0000 | 0.0000 | 0.0000 | 100000 | 0 | 0 | 100000 | 0 | 0 | . | . |
| 100000 | 1.20 | 1.0000 | 0.0000 | 100000 | 0 | 0 | 30.81 | 1.0000 | 1.0000 | 0.0000 | 0.0000 | 100000 | 0 | 0 | 100000 | 0 | 0 | . | . |
