# Supplementary material for: Hardy-Weinberg Equilibrium Testing of Biological Ascertainment for Mendelian Randomization Studies
Source: PubMed Central journal article supplement — Am J Epidemiol. 2009 Jan 6;169(4):505–14. doi: 10.1093/aje/kwn359 (PMC2640163; doi:10.1093/aje/kwn359), 2009-01-06
Supplement: kwn359_11.pdf [file kwn359_11.pdf]

Web Table 9. Deviations from Hardy Weinberg Equilibrium computed from the 95% CI bounds of allele frequency for sample sizes of 5000, 10000, 20000, 50000 and 100000, and for starting allele frequencies from 0.05 to 0.95 (with increments of 0.05).  $p_{true}$  and  $q_{true}$  are the allele frequencies used to start the computations. Hz1 Obs are the observed values for Hz1 after subtracting/adding from the homozygote group a constant number k ranging from 80% to 120%.  $\chi^2$  is the HWE  $\chi^2$  value.  $\chi^2$  (low CI) and  $\chi^2$  (high CI) are the HWE  $\chi^2$  values for the allele frequencies defined by the low bound of the 95% CI and by the high bound of the 95% CI, respectively. Also shown are the expected counts for each genotype group computed by the low and high bounds of the 95% CI.

| N    | k    | $p_{true}$ | $q_{true}$ | Hz1 Obs | Het Obs | Hz2 Obs | $\chi^2$ | LowCI p | HighCI p | LowCI q | HighCI q | Hz1 Exp (lowCI) | Het Exp (lowCI) | Hz1 Exp (low CI) | Hz1 Exp (high CI) | Het Exp (high CI) | Hz2Exp (high CI) | $\chi^2$ (low CI) | $\chi^2$ (high CI) |
|------|------|------------|------------|---------|---------|---------|----------|---------|----------|---------|----------|-----------------|-----------------|------------------|-------------------|-------------------|------------------|-------------------|--------------------|
| 5000 | 0.80 | 0.05       | 0.95       | 10      | 475     | 4513    | 0.46     | 0.0457  | 0.0543   | 0.9457  | 0.9543   | 10              | 436             | 4553             | 15                | 513               | 4472             | 3.80              | 4.74               |
| 5000 | 0.81 | 0.05       | 0.95       | 10      | 475     | 4513    | 0.41     | 0.0457  | 0.0543   | 0.9457  | 0.9543   | 10              | 436             | 4553             | 15                | 513               | 4472             | 3.79              | 4.66               |
| 5000 | 0.82 | 0.05       | 0.95       | 10      | 475     | 4513    | 0.37     | 0.0457  | 0.0543   | 0.9457  | 0.9543   | 10              | 436             | 4553             | 15                | 513               | 4472             | 3.79              | 4.58               |
| 5000 | 0.83 | 0.05       | 0.95       | 10      | 475     | 4513    | 0.33     | 0.0457  | 0.0543   | 0.9457  | 0.9543   | 10              | 436             | 4553             | 15                | 513               | 4472             | 3.78              | 4.51               |
| 5000 | 0.84 | 0.05       | 0.95       | 11      | 475     | 4513    | 0.29     | 0.0457  | 0.0543   | 0.9457  | 0.9543   | 10              | 436             | 4553             | 15                | 513               | 4472             | 3.78              | 4.43               |
| 5000 | 0.85 | 0.05       | 0.95       | 11      | 475     | 4513    | 0.26     | 0.0457  | 0.0543   | 0.9457  | 0.9543   | 10              | 436             | 4553             | 15                | 513               | 4472             | 3.79              | 4.36               |
| 5000 | 0.86 | 0.05       | 0.95       | 11      | 475     | 4513    | 0.22     | 0.0457  | 0.0543   | 0.9457  | 0.9543   | 10              | 436             | 4553             | 15                | 513               | 4472             | 3.79              | 4.29               |
| 5000 | 0.87 | 0.05       | 0.95       | 11      | 475     | 4513    | 0.19     | 0.0457  | 0.0543   | 0.9457  | 0.9543   | 10              | 436             | 4553             | 15                | 513               | 4472             | 3.80              | 4.23               |
| 5000 | 0.88 | 0.05       | 0.95       | 11      | 475     | 4513    | 0.16     | 0.0457  | 0.0543   | 0.9457  | 0.9543   | 10              | 436             | 4553             | 15                | 513               | 4472             | 3.81              | 4.16               |
| 5000 | 0.89 | 0.05       | 0.95       | 11      | 475     | 4513    | 0.14     | 0.0457  | 0.0543   | 0.9457  | 0.9543   | 10              | 436             | 4553             | 15                | 513               | 4472             | 3.83              | 4.10               |
| 5000 | 0.90 | 0.05       | 0.95       | 11      | 475     | 4513    | 0.11     | 0.0457  | 0.0543   | 0.9457  | 0.9543   | 10              | 436             | 4553             | 15                | 513               | 4472             | 3.84              | 4.04               |
| 5000 | 0.91 | 0.05       | 0.95       | 11      | 475     | 4513    | 0.09     | 0.0457  | 0.0543   | 0.9457  | 0.9543   | 10              | 436             | 4553             | 15                | 513               | 4472             | 3.86              | 3.98               |
| 5000 | 0.92 | 0.05       | 0.95       | 12      | 475     | 4513    | 0.07     | 0.0457  | 0.0543   | 0.9457  | 0.9543   | 10              | 436             | 4553             | 15                | 513               | 4472             | 3.89              | 3.93               |
| 5000 | 0.93 | 0.05       | 0.95       | 12      | 475     | 4513    | 0.06     | 0.0457  | 0.0543   | 0.9457  | 0.9543   | 10              | 436             | 4553             | 15                | 513               | 4472             | 3.91              | 3.87               |
| 5000 | 0.94 | 0.05       | 0.95       | 12      | 475     | 4513    | 0.04     | 0.0457  | 0.0543   | 0.9457  | 0.9543   | 10              | 436             | 4553             | 15                | 513               | 4472             | 3.94              | 3.82               |
| 5000 | 0.95 | 0.05       | 0.95       | 12      | 475     | 4513    | 0.03     | 0.0457  | 0.0543   | 0.9457  | 0.9543   | 10              | 436             | 4553             | 15                | 513               | 4472             | 3.98              | 3.77               |
| 5000 | 0.96 | 0.05       | 0.95       | 12      | 475     | 4513    | 0.02     | 0.0457  | 0.0543   | 0.9457  | 0.9543   | 10              | 436             | 4553             | 15                | 513               | 4472             | 4.01              | 3.72               |
| 5000 | 0.97 | 0.05       | 0.95       | 12      | 475     | 4513    | 0.01     | 0.0457  | 0.0543   | 0.9457  | 0.9543   | 10              | 436             | 4553             | 15                | 513               | 4472             | 4.05              | 3.68               |
| 5000 | 0.98 | 0.05       | 0.95       | 12      | 475     | 4513    | 0.00     | 0.0457  | 0.0543   | 0.9457  | 0.9543   | 10              | 436             | 4553             | 15                | 513               | 4472             | 4.09              | 3.64               |
| 5000 | 0.99 | 0.05       | 0.95       | 12      | 475     | 4513    | 0.00     | 0.0457  | 0.0543   | 0.9457  | 0.9543   | 10              | 436             | 4553             | 15                | 513               | 4472             | 4.14              | 3.59               |
| 5000 | 1.00 | 0.05       | 0.95       | 13      | 475     | 4513    | 0.00     | 0.0457  | 0.0543   | 0.9457  | 0.9543   | 10              | 436             | 4553             | 15                | 513               | 4472             | 4.18              | 3.56               |
| 5000 | 1.01 | 0.05       | 0.95       | 13      | 475     | 4513    | 0.00     | 0.0457  | 0.0543   | 0.9457  | 0.9543   | 10              | 436             | 4553             | 15                | 513               | 4472             | 4.23              | 3.52               |
| 5000 | 1.02 | 0.05       | 0.95       | 13      | 475     | 4513    | 0.00     | 0.0457  | 0.0543   | 0.9457  | 0.9543   | 10              | 436             | 4553             | 15                | 513               | 4472             | 4.29              | 3.48               |
| 5000 | 1.03 | 0.05       | 0.95       | 13      | 475     | 4513    | 0.01     | 0.0457  | 0.0543   | 0.9457  | 0.9543   | 10              | 436             | 4553             | 15                | 513               | 4472             | 4.34              | 3.45               |
| 5000 | 1.04 | 0.05       | 0.95       | 13      | 475     | 4513    | 0.02     | 0.0457  | 0.0543   | 0.9457  | 0.9543   | 10              | 436             | 4553             | 15                | 513               | 4472             | 4.40              | 3.42               |
| 5000 | 1.05 | 0.05       | 0.95       | 13      | 475     | 4513    | 0.03     | 0.0457  | 0.0543   | 0.9457  | 0.9543   | 10              | 436             | 4553             | 15                | 513               | 4472             | 4.46              | 3.39               |
| 5000 | 1.06 | 0.05       | 0.95       | 13      | 475     | 4513    | 0.04     | 0.0457  | 0.0543   | 0.9457  | 0.9543   | 10              | 436             | 4553             | 15                | 513               | 4472             | 4.53              | 3.37               |

|      |      |      |      |    |     |      |      |        |        |        |        |    |     |      |    |     |      |      |      |
|------|------|------|------|----|-----|------|------|--------|--------|--------|--------|----|-----|------|----|-----|------|------|------|
| 5000 | 1.07 | 0.05 | 0.95 | 13 | 475 | 4513 | 0.05 | 0.0457 | 0.0543 | 0.9457 | 0.9543 | 10 | 436 | 4553 | 15 | 513 | 4472 | 4.60 | 3.34 |
| 5000 | 1.08 | 0.05 | 0.95 | 14 | 475 | 4513 | 0.07 | 0.0457 | 0.0543 | 0.9457 | 0.9543 | 10 | 436 | 4553 | 15 | 513 | 4472 | 4.67 | 3.32 |
| 5000 | 1.09 | 0.05 | 0.95 | 14 | 475 | 4513 | 0.09 | 0.0457 | 0.0543 | 0.9457 | 0.9543 | 10 | 436 | 4553 | 15 | 513 | 4472 | 4.74 | 3.30 |
| 5000 | 1.10 | 0.05 | 0.95 | 14 | 475 | 4513 | 0.11 | 0.0457 | 0.0543 | 0.9457 | 0.9543 | 10 | 436 | 4553 | 15 | 513 | 4472 | 4.82 | 3.28 |
| 5000 | 1.11 | 0.05 | 0.95 | 14 | 475 | 4513 | 0.14 | 0.0457 | 0.0543 | 0.9457 | 0.9543 | 10 | 436 | 4553 | 15 | 513 | 4472 | 4.90 | 3.27 |
| 5000 | 1.12 | 0.05 | 0.95 | 14 | 475 | 4513 | 0.16 | 0.0457 | 0.0543 | 0.9457 | 0.9543 | 10 | 436 | 4553 | 15 | 513 | 4472 | 4.98 | 3.25 |
| 5000 | 1.13 | 0.05 | 0.95 | 14 | 475 | 4513 | 0.19 | 0.0457 | 0.0543 | 0.9457 | 0.9543 | 10 | 436 | 4553 | 15 | 513 | 4472 | 5.07 | 3.24 |
| 5000 | 1.14 | 0.05 | 0.95 | 14 | 475 | 4513 | 0.22 | 0.0457 | 0.0543 | 0.9457 | 0.9543 | 10 | 436 | 4553 | 15 | 513 | 4472 | 5.16 | 3.23 |
| 5000 | 1.15 | 0.05 | 0.95 | 14 | 475 | 4513 | 0.25 | 0.0457 | 0.0543 | 0.9457 | 0.9543 | 10 | 436 | 4553 | 15 | 513 | 4472 | 5.25 | 3.23 |
| 5000 | 1.16 | 0.05 | 0.95 | 15 | 475 | 4513 | 0.28 | 0.0457 | 0.0543 | 0.9457 | 0.9543 | 10 | 436 | 4553 | 15 | 513 | 4472 | 5.35 | 3.22 |
| 5000 | 1.17 | 0.05 | 0.95 | 15 | 475 | 4513 | 0.32 | 0.0457 | 0.0543 | 0.9457 | 0.9543 | 10 | 436 | 4553 | 15 | 513 | 4472 | 5.45 | 3.22 |
| 5000 | 1.18 | 0.05 | 0.95 | 15 | 475 | 4513 | 0.36 | 0.0457 | 0.0543 | 0.9457 | 0.9543 | 10 | 436 | 4553 | 15 | 513 | 4472 | 5.55 | 3.22 |
| 5000 | 1.19 | 0.05 | 0.95 | 15 | 475 | 4513 | 0.40 | 0.0457 | 0.0543 | 0.9457 | 0.9543 | 10 | 436 | 4553 | 15 | 513 | 4472 | 5.65 | 3.22 |
| 5000 | 1.20 | 0.05 | 0.95 | 15 | 475 | 4513 | 0.44 | 0.0457 | 0.0543 | 0.9457 | 0.9543 | 10 | 436 | 4553 | 15 | 513 | 4472 | 5.76 | 3.22 |
| 5000 | 0.80 | 0.1  | 0.9  | 40 | 900 | 4050 | 1.68 | 0.0941 | 0.1059 | 0.8941 | 0.9059 | 44 | 853 | 4103 | 56 | 947 | 3997 | 3.74 | 7.60 |
| 5000 | 0.81 | 0.1  | 0.9  | 41 | 900 | 4050 | 1.52 | 0.0941 | 0.1059 | 0.8941 | 0.9059 | 44 | 853 | 4103 | 56 | 947 | 3997 | 3.65 | 7.31 |
| 5000 | 0.82 | 0.1  | 0.9  | 41 | 900 | 4050 | 1.36 | 0.0941 | 0.1059 | 0.8941 | 0.9059 | 44 | 853 | 4103 | 56 | 947 | 3997 | 3.57 | 7.04 |
| 5000 | 0.83 | 0.1  | 0.9  | 42 | 900 | 4050 | 1.21 | 0.0941 | 0.1059 | 0.8941 | 0.9059 | 44 | 853 | 4103 | 56 | 947 | 3997 | 3.50 | 6.78 |
| 5000 | 0.84 | 0.1  | 0.9  | 42 | 900 | 4050 | 1.07 | 0.0941 | 0.1059 | 0.8941 | 0.9059 | 44 | 853 | 4103 | 56 | 947 | 3997 | 3.44 | 6.52 |
| 5000 | 0.85 | 0.1  | 0.9  | 43 | 900 | 4050 | 0.94 | 0.0941 | 0.1059 | 0.8941 | 0.9059 | 44 | 853 | 4103 | 56 | 947 | 3997 | 3.39 | 6.28 |
| 5000 | 0.86 | 0.1  | 0.9  | 43 | 900 | 4050 | 0.82 | 0.0941 | 0.1059 | 0.8941 | 0.9059 | 44 | 853 | 4103 | 56 | 947 | 3997 | 3.36 | 6.04 |
| 5000 | 0.87 | 0.1  | 0.9  | 44 | 900 | 4050 | 0.70 | 0.0941 | 0.1059 | 0.8941 | 0.9059 | 44 | 853 | 4103 | 56 | 947 | 3997 | 3.33 | 5.81 |
| 5000 | 0.88 | 0.1  | 0.9  | 44 | 900 | 4050 | 0.60 | 0.0941 | 0.1059 | 0.8941 | 0.9059 | 44 | 853 | 4103 | 56 | 947 | 3997 | 3.32 | 5.59 |
| 5000 | 0.89 | 0.1  | 0.9  | 45 | 900 | 4050 | 0.50 | 0.0941 | 0.1059 | 0.8941 | 0.9059 | 44 | 853 | 4103 | 56 | 947 | 3997 | 3.32 | 5.38 |
| 5000 | 0.90 | 0.1  | 0.9  | 45 | 900 | 4050 | 0.41 | 0.0941 | 0.1059 | 0.8941 | 0.9059 | 44 | 853 | 4103 | 56 | 947 | 3997 | 3.33 | 5.18 |
| 5000 | 0.91 | 0.1  | 0.9  | 46 | 900 | 4050 | 0.33 | 0.0941 | 0.1059 | 0.8941 | 0.9059 | 44 | 853 | 4103 | 56 | 947 | 3997 | 3.35 | 4.99 |
| 5000 | 0.92 | 0.1  | 0.9  | 46 | 900 | 4050 | 0.26 | 0.0941 | 0.1059 | 0.8941 | 0.9059 | 44 | 853 | 4103 | 56 | 947 | 3997 | 3.39 | 4.80 |
| 5000 | 0.93 | 0.1  | 0.9  | 47 | 900 | 4050 | 0.20 | 0.0941 | 0.1059 | 0.8941 | 0.9059 | 44 | 853 | 4103 | 56 | 947 | 3997 | 3.43 | 4.63 |
| 5000 | 0.94 | 0.1  | 0.9  | 47 | 900 | 4050 | 0.15 | 0.0941 | 0.1059 | 0.8941 | 0.9059 | 44 | 853 | 4103 | 56 | 947 | 3997 | 3.49 | 4.46 |
| 5000 | 0.95 | 0.1  | 0.9  | 48 | 900 | 4050 | 0.10 | 0.0941 | 0.1059 | 0.8941 | 0.9059 | 44 | 853 | 4103 | 56 | 947 | 3997 | 3.55 | 4.30 |
| 5000 | 0.96 | 0.1  | 0.9  | 48 | 900 | 4050 | 0.07 | 0.0941 | 0.1059 | 0.8941 | 0.9059 | 44 | 853 | 4103 | 56 | 947 | 3997 | 3.63 | 4.16 |
| 5000 | 0.97 | 0.1  | 0.9  | 49 | 900 | 4050 | 0.04 | 0.0941 | 0.1059 | 0.8941 | 0.9059 | 44 | 853 | 4103 | 56 | 947 | 3997 | 3.72 | 4.02 |
| 5000 | 0.98 | 0.1  | 0.9  | 49 | 900 | 4050 | 0.02 | 0.0941 | 0.1059 | 0.8941 | 0.9059 | 44 | 853 | 4103 | 56 | 947 | 3997 | 3.82 | 3.89 |
| 5000 | 0.99 | 0.1  | 0.9  | 50 | 900 | 4050 | 0.00 | 0.0941 | 0.1059 | 0.8941 | 0.9059 | 44 | 853 | 4103 | 56 | 947 | 3997 | 3.93 | 3.77 |
| 5000 | 1.00 | 0.1  | 0.9  | 50 | 900 | 4050 | 0.00 | 0.0941 | 0.1059 | 0.8941 | 0.9059 | 44 | 853 | 4103 | 56 | 947 | 3997 | 4.06 | 3.65 |

|      |      |      |      |     |      |      |      |        |        |        |        |     |      |      |     |      |      |      |       |
|------|------|------|------|-----|------|------|------|--------|--------|--------|--------|-----|------|------|-----|------|------|------|-------|
| 5000 | 1.01 | 0.1  | 0.9  | 51  | 900  | 4050 | 0.00 | 0.0941 | 0.1059 | 0.8941 | 0.9059 | 44  | 853  | 4103 | 56  | 947  | 3997 | 4.19 | 3.55  |
| 5000 | 1.02 | 0.1  | 0.9  | 51  | 900  | 4050 | 0.02 | 0.0941 | 0.1059 | 0.8941 | 0.9059 | 44  | 853  | 4103 | 56  | 947  | 3997 | 4.34 | 3.45  |
| 5000 | 1.03 | 0.1  | 0.9  | 52  | 900  | 4050 | 0.04 | 0.0941 | 0.1059 | 0.8941 | 0.9059 | 44  | 853  | 4103 | 56  | 947  | 3997 | 4.49 | 3.37  |
| 5000 | 1.04 | 0.1  | 0.9  | 52  | 900  | 4050 | 0.06 | 0.0941 | 0.1059 | 0.8941 | 0.9059 | 44  | 853  | 4103 | 56  | 947  | 3997 | 4.66 | 3.29  |
| 5000 | 1.05 | 0.1  | 0.9  | 53  | 900  | 4050 | 0.10 | 0.0941 | 0.1059 | 0.8941 | 0.9059 | 44  | 853  | 4103 | 56  | 947  | 3997 | 4.84 | 3.22  |
| 5000 | 1.06 | 0.1  | 0.9  | 53  | 900  | 4050 | 0.14 | 0.0941 | 0.1059 | 0.8941 | 0.9059 | 44  | 853  | 4103 | 56  | 947  | 3997 | 5.03 | 3.17  |
| 5000 | 1.07 | 0.1  | 0.9  | 54  | 900  | 4050 | 0.20 | 0.0941 | 0.1059 | 0.8941 | 0.9059 | 44  | 853  | 4103 | 56  | 947  | 3997 | 5.23 | 3.12  |
| 5000 | 1.08 | 0.1  | 0.9  | 54  | 900  | 4050 | 0.26 | 0.0941 | 0.1059 | 0.8941 | 0.9059 | 44  | 853  | 4103 | 56  | 947  | 3997 | 5.45 | 3.07  |
| 5000 | 1.09 | 0.1  | 0.9  | 55  | 900  | 4050 | 0.32 | 0.0941 | 0.1059 | 0.8941 | 0.9059 | 44  | 853  | 4103 | 56  | 947  | 3997 | 5.67 | 3.04  |
| 5000 | 1.10 | 0.1  | 0.9  | 55  | 900  | 4050 | 0.40 | 0.0941 | 0.1059 | 0.8941 | 0.9059 | 44  | 853  | 4103 | 56  | 947  | 3997 | 5.91 | 3.02  |
| 5000 | 1.11 | 0.1  | 0.9  | 56  | 900  | 4050 | 0.48 | 0.0941 | 0.1059 | 0.8941 | 0.9059 | 44  | 853  | 4103 | 56  | 947  | 3997 | 6.16 | 3.00  |
| 5000 | 1.12 | 0.1  | 0.9  | 56  | 900  | 4050 | 0.57 | 0.0941 | 0.1059 | 0.8941 | 0.9059 | 44  | 853  | 4103 | 56  | 947  | 3997 | 6.41 | 3.00  |
| 5000 | 1.13 | 0.1  | 0.9  | 57  | 900  | 4050 | 0.67 | 0.0941 | 0.1059 | 0.8941 | 0.9059 | 44  | 853  | 4103 | 56  | 947  | 3997 | 6.68 | 3.00  |
| 5000 | 1.14 | 0.1  | 0.9  | 57  | 900  | 4050 | 0.77 | 0.0941 | 0.1059 | 0.8941 | 0.9059 | 44  | 853  | 4103 | 56  | 947  | 3997 | 6.97 | 3.02  |
| 5000 | 1.15 | 0.1  | 0.9  | 58  | 900  | 4050 | 0.89 | 0.0941 | 0.1059 | 0.8941 | 0.9059 | 44  | 853  | 4103 | 56  | 947  | 3997 | 7.26 | 3.04  |
| 5000 | 1.16 | 0.1  | 0.9  | 58  | 900  | 4050 | 1.01 | 0.0941 | 0.1059 | 0.8941 | 0.9059 | 44  | 853  | 4103 | 56  | 947  | 3997 | 7.56 | 3.07  |
| 5000 | 1.17 | 0.1  | 0.9  | 59  | 900  | 4050 | 1.13 | 0.0941 | 0.1059 | 0.8941 | 0.9059 | 44  | 853  | 4103 | 56  | 947  | 3997 | 7.88 | 3.11  |
| 5000 | 1.18 | 0.1  | 0.9  | 59  | 900  | 4050 | 1.27 | 0.0941 | 0.1059 | 0.8941 | 0.9059 | 44  | 853  | 4103 | 56  | 947  | 3997 | 8.20 | 3.15  |
| 5000 | 1.19 | 0.1  | 0.9  | 60  | 900  | 4050 | 1.41 | 0.0941 | 0.1059 | 0.8941 | 0.9059 | 44  | 853  | 4103 | 56  | 947  | 3997 | 8.54 | 3.21  |
| 5000 | 1.20 | 0.1  | 0.9  | 60  | 900  | 4050 | 1.56 | 0.0941 | 0.1059 | 0.8941 | 0.9059 | 44  | 853  | 4103 | 56  | 947  | 3997 | 8.89 | 3.28  |
| 5000 | 0.80 | 0.15 | 0.85 | 90  | 1275 | 3613 | 3.44 | 0.1430 | 0.1570 | 0.8430 | 0.8570 | 102 | 1226 | 3672 | 123 | 1324 | 3553 | 4.44 | 11.73 |
| 5000 | 0.81 | 0.15 | 0.85 | 91  | 1275 | 3613 | 3.10 | 0.1430 | 0.1570 | 0.8430 | 0.8570 | 102 | 1226 | 3672 | 123 | 1324 | 3553 | 4.18 | 11.14 |
| 5000 | 0.82 | 0.15 | 0.85 | 92  | 1275 | 3613 | 2.77 | 0.1430 | 0.1570 | 0.8430 | 0.8570 | 102 | 1226 | 3672 | 123 | 1324 | 3553 | 3.95 | 10.56 |
| 5000 | 0.83 | 0.15 | 0.85 | 93  | 1275 | 3613 | 2.46 | 0.1430 | 0.1570 | 0.8430 | 0.8570 | 102 | 1226 | 3672 | 123 | 1324 | 3553 | 3.74 | 10.00 |
| 5000 | 0.84 | 0.15 | 0.85 | 95  | 1275 | 3613 | 2.18 | 0.1430 | 0.1570 | 0.8430 | 0.8570 | 102 | 1226 | 3672 | 123 | 1324 | 3553 | 3.56 | 9.47  |
| 5000 | 0.85 | 0.15 | 0.85 | 96  | 1275 | 3613 | 1.91 | 0.1430 | 0.1570 | 0.8430 | 0.8570 | 102 | 1226 | 3672 | 123 | 1324 | 3553 | 3.40 | 8.95  |
| 5000 | 0.86 | 0.15 | 0.85 | 97  | 1275 | 3613 | 1.66 | 0.1430 | 0.1570 | 0.8430 | 0.8570 | 102 | 1226 | 3672 | 123 | 1324 | 3553 | 3.26 | 8.46  |
| 5000 | 0.87 | 0.15 | 0.85 | 98  | 1275 | 3613 | 1.42 | 0.1430 | 0.1570 | 0.8430 | 0.8570 | 102 | 1226 | 3672 | 123 | 1324 | 3553 | 3.16 | 7.99  |
| 5000 | 0.88 | 0.15 | 0.85 | 99  | 1275 | 3613 | 1.21 | 0.1430 | 0.1570 | 0.8430 | 0.8570 | 102 | 1226 | 3672 | 123 | 1324 | 3553 | 3.07 | 7.53  |
| 5000 | 0.89 | 0.15 | 0.85 | 100 | 1275 | 3613 | 1.01 | 0.1430 | 0.1570 | 0.8430 | 0.8570 | 102 | 1226 | 3672 | 123 | 1324 | 3553 | 3.01 | 7.10  |
| 5000 | 0.90 | 0.15 | 0.85 | 101 | 1275 | 3613 | 0.84 | 0.1430 | 0.1570 | 0.8430 | 0.8570 | 102 | 1226 | 3672 | 123 | 1324 | 3553 | 2.98 | 6.69  |
| 5000 | 0.91 | 0.15 | 0.85 | 102 | 1275 | 3613 | 0.68 | 0.1430 | 0.1570 | 0.8430 | 0.8570 | 102 | 1226 | 3672 | 123 | 1324 | 3553 | 2.97 | 6.30  |
| 5000 | 0.92 | 0.15 | 0.85 | 104 | 1275 | 3613 | 0.53 | 0.1430 | 0.1570 | 0.8430 | 0.8570 | 102 | 1226 | 3672 | 123 | 1324 | 3553 | 2.98 | 5.93  |
| 5000 | 0.93 | 0.15 | 0.85 | 105 | 1275 | 3613 | 0.41 | 0.1430 | 0.1570 | 0.8430 | 0.8570 | 102 | 1226 | 3672 | 123 | 1324 | 3553 | 3.02 | 5.58  |
| 5000 | 0.94 | 0.15 | 0.85 | 106 | 1275 | 3613 | 0.30 | 0.1430 | 0.1570 | 0.8430 | 0.8570 | 102 | 1226 | 3672 | 123 | 1324 | 3553 | 3.09 | 5.25  |

|      |      |      |      |     |      |      |      |        |        |        |        |     |      |      |     |      |      |       |       |
|------|------|------|------|-----|------|------|------|--------|--------|--------|--------|-----|------|------|-----|------|------|-------|-------|
| 5000 | 0.95 | 0.15 | 0.85 | 107 | 1275 | 3613 | 0.21 | 0.1430 | 0.1570 | 0.8430 | 0.8570 | 102 | 1226 | 3672 | 123 | 1324 | 3553 | 3.18  | 4.94  |
| 5000 | 0.96 | 0.15 | 0.85 | 108 | 1275 | 3613 | 0.13 | 0.1430 | 0.1570 | 0.8430 | 0.8570 | 102 | 1226 | 3672 | 123 | 1324 | 3553 | 3.29  | 4.65  |
| 5000 | 0.97 | 0.15 | 0.85 | 109 | 1275 | 3613 | 0.07 | 0.1430 | 0.1570 | 0.8430 | 0.8570 | 102 | 1226 | 3672 | 123 | 1324 | 3553 | 3.43  | 4.38  |
| 5000 | 0.98 | 0.15 | 0.85 | 110 | 1275 | 3613 | 0.03 | 0.1430 | 0.1570 | 0.8430 | 0.8570 | 102 | 1226 | 3672 | 123 | 1324 | 3553 | 3.60  | 4.13  |
| 5000 | 0.99 | 0.15 | 0.85 | 111 | 1275 | 3613 | 0.01 | 0.1430 | 0.1570 | 0.8430 | 0.8570 | 102 | 1226 | 3672 | 123 | 1324 | 3553 | 3.78  | 3.91  |
| 5000 | 1.00 | 0.15 | 0.85 | 113 | 1275 | 3613 | 0.00 | 0.1430 | 0.1570 | 0.8430 | 0.8570 | 102 | 1226 | 3672 | 123 | 1324 | 3553 | 4.00  | 3.70  |
| 5000 | 1.01 | 0.15 | 0.85 | 114 | 1275 | 3613 | 0.01 | 0.1430 | 0.1570 | 0.8430 | 0.8570 | 102 | 1226 | 3672 | 123 | 1324 | 3553 | 4.24  | 3.52  |
| 5000 | 1.02 | 0.15 | 0.85 | 115 | 1275 | 3613 | 0.03 | 0.1430 | 0.1570 | 0.8430 | 0.8570 | 102 | 1226 | 3672 | 123 | 1324 | 3553 | 4.50  | 3.35  |
| 5000 | 1.03 | 0.15 | 0.85 | 116 | 1275 | 3613 | 0.07 | 0.1430 | 0.1570 | 0.8430 | 0.8570 | 102 | 1226 | 3672 | 123 | 1324 | 3553 | 4.79  | 3.21  |
| 5000 | 1.04 | 0.15 | 0.85 | 117 | 1275 | 3613 | 0.13 | 0.1430 | 0.1570 | 0.8430 | 0.8570 | 102 | 1226 | 3672 | 123 | 1324 | 3553 | 5.10  | 3.08  |
| 5000 | 1.05 | 0.15 | 0.85 | 118 | 1275 | 3613 | 0.20 | 0.1430 | 0.1570 | 0.8430 | 0.8570 | 102 | 1226 | 3672 | 123 | 1324 | 3553 | 5.44  | 2.98  |
| 5000 | 1.06 | 0.15 | 0.85 | 119 | 1275 | 3613 | 0.29 | 0.1430 | 0.1570 | 0.8430 | 0.8570 | 102 | 1226 | 3672 | 123 | 1324 | 3553 | 5.80  | 2.89  |
| 5000 | 1.07 | 0.15 | 0.85 | 120 | 1275 | 3613 | 0.39 | 0.1430 | 0.1570 | 0.8430 | 0.8570 | 102 | 1226 | 3672 | 123 | 1324 | 3553 | 6.18  | 2.83  |
| 5000 | 1.08 | 0.15 | 0.85 | 122 | 1275 | 3613 | 0.51 | 0.1430 | 0.1570 | 0.8430 | 0.8570 | 102 | 1226 | 3672 | 123 | 1324 | 3553 | 6.59  | 2.79  |
| 5000 | 1.09 | 0.15 | 0.85 | 123 | 1275 | 3613 | 0.64 | 0.1430 | 0.1570 | 0.8430 | 0.8570 | 102 | 1226 | 3672 | 123 | 1324 | 3553 | 7.03  | 2.77  |
| 5000 | 1.10 | 0.15 | 0.85 | 124 | 1275 | 3613 | 0.79 | 0.1430 | 0.1570 | 0.8430 | 0.8570 | 102 | 1226 | 3672 | 123 | 1324 | 3553 | 7.49  | 2.77  |
| 5000 | 1.11 | 0.15 | 0.85 | 125 | 1275 | 3613 | 0.95 | 0.1430 | 0.1570 | 0.8430 | 0.8570 | 102 | 1226 | 3672 | 123 | 1324 | 3553 | 7.98  | 2.79  |
| 5000 | 1.12 | 0.15 | 0.85 | 126 | 1275 | 3613 | 1.13 | 0.1430 | 0.1570 | 0.8430 | 0.8570 | 102 | 1226 | 3672 | 123 | 1324 | 3553 | 8.49  | 2.83  |
| 5000 | 1.13 | 0.15 | 0.85 | 127 | 1275 | 3613 | 1.33 | 0.1430 | 0.1570 | 0.8430 | 0.8570 | 102 | 1226 | 3672 | 123 | 1324 | 3553 | 9.02  | 2.89  |
| 5000 | 1.14 | 0.15 | 0.85 | 128 | 1275 | 3613 | 1.53 | 0.1430 | 0.1570 | 0.8430 | 0.8570 | 102 | 1226 | 3672 | 123 | 1324 | 3553 | 9.58  | 2.97  |
| 5000 | 1.15 | 0.15 | 0.85 | 129 | 1275 | 3613 | 1.76 | 0.1430 | 0.1570 | 0.8430 | 0.8570 | 102 | 1226 | 3672 | 123 | 1324 | 3553 | 10.17 | 3.07  |
| 5000 | 1.16 | 0.15 | 0.85 | 131 | 1275 | 3613 | 1.99 | 0.1430 | 0.1570 | 0.8430 | 0.8570 | 102 | 1226 | 3672 | 123 | 1324 | 3553 | 10.78 | 3.19  |
| 5000 | 1.17 | 0.15 | 0.85 | 132 | 1275 | 3613 | 2.24 | 0.1430 | 0.1570 | 0.8430 | 0.8570 | 102 | 1226 | 3672 | 123 | 1324 | 3553 | 11.41 | 3.34  |
| 5000 | 1.18 | 0.15 | 0.85 | 133 | 1275 | 3613 | 2.51 | 0.1430 | 0.1570 | 0.8430 | 0.8570 | 102 | 1226 | 3672 | 123 | 1324 | 3553 | 12.07 | 3.50  |
| 5000 | 1.19 | 0.15 | 0.85 | 134 | 1275 | 3613 | 2.79 | 0.1430 | 0.1570 | 0.8430 | 0.8570 | 102 | 1226 | 3672 | 123 | 1324 | 3553 | 12.75 | 3.68  |
| 5000 | 1.20 | 0.15 | 0.85 | 135 | 1275 | 3613 | 3.08 | 0.1430 | 0.1570 | 0.8430 | 0.8570 | 102 | 1226 | 3672 | 123 | 1324 | 3553 | 13.46 | 3.89  |
| 5000 | 0.80 | 0.2  | 0.8  | 160 | 1600 | 3200 | 5.51 | 0.1922 | 0.2078 | 0.7922 | 0.8078 | 185 | 1552 | 3263 | 216 | 1646 | 3138 | 5.97  | 17.06 |
| 5000 | 0.81 | 0.2  | 0.8  | 162 | 1600 | 3200 | 4.96 | 0.1922 | 0.2078 | 0.7922 | 0.8078 | 185 | 1552 | 3263 | 216 | 1646 | 3138 | 5.45  | 16.05 |
| 5000 | 0.82 | 0.2  | 0.8  | 164 | 1600 | 3200 | 4.43 | 0.1922 | 0.2078 | 0.7922 | 0.8078 | 185 | 1552 | 3263 | 216 | 1646 | 3138 | 4.98  | 15.06 |
| 5000 | 0.83 | 0.2  | 0.8  | 166 | 1600 | 3200 | 3.94 | 0.1922 | 0.2078 | 0.7922 | 0.8078 | 185 | 1552 | 3263 | 216 | 1646 | 3138 | 4.56  | 14.12 |
| 5000 | 0.84 | 0.2  | 0.8  | 168 | 1600 | 3200 | 3.47 | 0.1922 | 0.2078 | 0.7922 | 0.8078 | 185 | 1552 | 3263 | 216 | 1646 | 3138 | 4.18  | 13.21 |
| 5000 | 0.85 | 0.2  | 0.8  | 170 | 1600 | 3200 | 3.04 | 0.1922 | 0.2078 | 0.7922 | 0.8078 | 185 | 1552 | 3263 | 216 | 1646 | 3138 | 3.84  | 12.34 |
| 5000 | 0.86 | 0.2  | 0.8  | 172 | 1600 | 3200 | 2.64 | 0.1922 | 0.2078 | 0.7922 | 0.8078 | 185 | 1552 | 3263 | 216 | 1646 | 3138 | 3.54  | 11.51 |
| 5000 | 0.87 | 0.2  | 0.8  | 174 | 1600 | 3200 | 2.27 | 0.1922 | 0.2078 | 0.7922 | 0.8078 | 185 | 1552 | 3263 | 216 | 1646 | 3138 | 3.29  | 10.71 |
| 5000 | 0.88 | 0.2  | 0.8  | 176 | 1600 | 3200 | 1.93 | 0.1922 | 0.2078 | 0.7922 | 0.8078 | 185 | 1552 | 3263 | 216 | 1646 | 3138 | 3.08  | 9.95  |

|      |      |      |      |     |      |      |      |        |        |        |        |     |      |      |     |      |      |       |       |
|------|------|------|------|-----|------|------|------|--------|--------|--------|--------|-----|------|------|-----|------|------|-------|-------|
| 5000 | 0.89 | 0.2  | 0.8  | 178 | 1600 | 3200 | 1.61 | 0.1922 | 0.2078 | 0.7922 | 0.8078 | 185 | 1552 | 3263 | 216 | 1646 | 3138 | 2.92  | 9.23  |
| 5000 | 0.90 | 0.2  | 0.8  | 180 | 1600 | 3200 | 1.33 | 0.1922 | 0.2078 | 0.7922 | 0.8078 | 185 | 1552 | 3263 | 216 | 1646 | 3138 | 2.80  | 8.55  |
| 5000 | 0.91 | 0.2  | 0.8  | 182 | 1600 | 3200 | 1.07 | 0.1922 | 0.2078 | 0.7922 | 0.8078 | 185 | 1552 | 3263 | 216 | 1646 | 3138 | 2.72  | 7.90  |
| 5000 | 0.92 | 0.2  | 0.8  | 184 | 1600 | 3200 | 0.84 | 0.1922 | 0.2078 | 0.7922 | 0.8078 | 185 | 1552 | 3263 | 216 | 1646 | 3138 | 2.68  | 7.29  |
| 5000 | 0.93 | 0.2  | 0.8  | 186 | 1600 | 3200 | 0.64 | 0.1922 | 0.2078 | 0.7922 | 0.8078 | 185 | 1552 | 3263 | 216 | 1646 | 3138 | 2.69  | 6.71  |
| 5000 | 0.94 | 0.2  | 0.8  | 188 | 1600 | 3200 | 0.47 | 0.1922 | 0.2078 | 0.7922 | 0.8078 | 185 | 1552 | 3263 | 216 | 1646 | 3138 | 2.74  | 6.18  |
| 5000 | 0.95 | 0.2  | 0.8  | 190 | 1600 | 3200 | 0.33 | 0.1922 | 0.2078 | 0.7922 | 0.8078 | 185 | 1552 | 3263 | 216 | 1646 | 3138 | 2.84  | 5.68  |
| 5000 | 0.96 | 0.2  | 0.8  | 192 | 1600 | 3200 | 0.21 | 0.1922 | 0.2078 | 0.7922 | 0.8078 | 185 | 1552 | 3263 | 216 | 1646 | 3138 | 2.97  | 5.21  |
| 5000 | 0.97 | 0.2  | 0.8  | 194 | 1600 | 3200 | 0.12 | 0.1922 | 0.2078 | 0.7922 | 0.8078 | 185 | 1552 | 3263 | 216 | 1646 | 3138 | 3.16  | 4.79  |
| 5000 | 0.98 | 0.2  | 0.8  | 196 | 1600 | 3200 | 0.05 | 0.1922 | 0.2078 | 0.7922 | 0.8078 | 185 | 1552 | 3263 | 216 | 1646 | 3138 | 3.38  | 4.40  |
| 5000 | 0.99 | 0.2  | 0.8  | 198 | 1600 | 3200 | 0.01 | 0.1922 | 0.2078 | 0.7922 | 0.8078 | 185 | 1552 | 3263 | 216 | 1646 | 3138 | 3.65  | 4.05  |
| 5000 | 1.00 | 0.2  | 0.8  | 200 | 1600 | 3200 | 0.00 | 0.1922 | 0.2078 | 0.7922 | 0.8078 | 185 | 1552 | 3263 | 216 | 1646 | 3138 | 3.96  | 3.73  |
| 5000 | 1.01 | 0.2  | 0.8  | 202 | 1600 | 3200 | 0.01 | 0.1922 | 0.2078 | 0.7922 | 0.8078 | 185 | 1552 | 3263 | 216 | 1646 | 3138 | 4.32  | 3.46  |
| 5000 | 1.02 | 0.2  | 0.8  | 204 | 1600 | 3200 | 0.05 | 0.1922 | 0.2078 | 0.7922 | 0.8078 | 185 | 1552 | 3263 | 216 | 1646 | 3138 | 4.71  | 3.22  |
| 5000 | 1.03 | 0.2  | 0.8  | 206 | 1600 | 3200 | 0.11 | 0.1922 | 0.2078 | 0.7922 | 0.8078 | 185 | 1552 | 3263 | 216 | 1646 | 3138 | 5.15  | 3.01  |
| 5000 | 1.04 | 0.2  | 0.8  | 208 | 1600 | 3200 | 0.20 | 0.1922 | 0.2078 | 0.7922 | 0.8078 | 185 | 1552 | 3263 | 216 | 1646 | 3138 | 5.64  | 2.85  |
| 5000 | 1.05 | 0.2  | 0.8  | 210 | 1600 | 3200 | 0.31 | 0.1922 | 0.2078 | 0.7922 | 0.8078 | 185 | 1552 | 3263 | 216 | 1646 | 3138 | 6.17  | 2.72  |
| 5000 | 1.06 | 0.2  | 0.8  | 212 | 1600 | 3200 | 0.45 | 0.1922 | 0.2078 | 0.7922 | 0.8078 | 185 | 1552 | 3263 | 216 | 1646 | 3138 | 6.74  | 2.62  |
| 5000 | 1.07 | 0.2  | 0.8  | 214 | 1600 | 3200 | 0.61 | 0.1922 | 0.2078 | 0.7922 | 0.8078 | 185 | 1552 | 3263 | 216 | 1646 | 3138 | 7.35  | 2.57  |
| 5000 | 1.08 | 0.2  | 0.8  | 216 | 1600 | 3200 | 0.80 | 0.1922 | 0.2078 | 0.7922 | 0.8078 | 185 | 1552 | 3263 | 216 | 1646 | 3138 | 8.01  | 2.55  |
| 5000 | 1.09 | 0.2  | 0.8  | 218 | 1600 | 3200 | 1.00 | 0.1922 | 0.2078 | 0.7922 | 0.8078 | 185 | 1552 | 3263 | 216 | 1646 | 3138 | 8.71  | 2.57  |
| 5000 | 1.10 | 0.2  | 0.8  | 220 | 1600 | 3200 | 1.24 | 0.1922 | 0.2078 | 0.7922 | 0.8078 | 185 | 1552 | 3263 | 216 | 1646 | 3138 | 9.46  | 2.63  |
| 5000 | 1.11 | 0.2  | 0.8  | 222 | 1600 | 3200 | 1.49 | 0.1922 | 0.2078 | 0.7922 | 0.8078 | 185 | 1552 | 3263 | 216 | 1646 | 3138 | 10.25 | 2.72  |
| 5000 | 1.12 | 0.2  | 0.8  | 224 | 1600 | 3200 | 1.77 | 0.1922 | 0.2078 | 0.7922 | 0.8078 | 185 | 1552 | 3263 | 216 | 1646 | 3138 | 11.08 | 2.85  |
| 5000 | 1.13 | 0.2  | 0.8  | 226 | 1600 | 3200 | 2.07 | 0.1922 | 0.2078 | 0.7922 | 0.8078 | 185 | 1552 | 3263 | 216 | 1646 | 3138 | 11.95 | 3.01  |
| 5000 | 1.14 | 0.2  | 0.8  | 228 | 1600 | 3200 | 2.39 | 0.1922 | 0.2078 | 0.7922 | 0.8078 | 185 | 1552 | 3263 | 216 | 1646 | 3138 | 12.87 | 3.22  |
| 5000 | 1.15 | 0.2  | 0.8  | 230 | 1600 | 3200 | 2.73 | 0.1922 | 0.2078 | 0.7922 | 0.8078 | 185 | 1552 | 3263 | 216 | 1646 | 3138 | 13.83 | 3.46  |
| 5000 | 1.16 | 0.2  | 0.8  | 232 | 1600 | 3200 | 3.10 | 0.1922 | 0.2078 | 0.7922 | 0.8078 | 185 | 1552 | 3263 | 216 | 1646 | 3138 | 14.84 | 3.74  |
| 5000 | 1.17 | 0.2  | 0.8  | 234 | 1600 | 3200 | 3.48 | 0.1922 | 0.2078 | 0.7922 | 0.8078 | 185 | 1552 | 3263 | 216 | 1646 | 3138 | 15.88 | 4.05  |
| 5000 | 1.18 | 0.2  | 0.8  | 236 | 1600 | 3200 | 3.89 | 0.1922 | 0.2078 | 0.7922 | 0.8078 | 185 | 1552 | 3263 | 216 | 1646 | 3138 | 16.97 | 4.40  |
| 5000 | 1.19 | 0.2  | 0.8  | 238 | 1600 | 3200 | 4.32 | 0.1922 | 0.2078 | 0.7922 | 0.8078 | 185 | 1552 | 3263 | 216 | 1646 | 3138 | 18.11 | 4.79  |
| 5000 | 1.20 | 0.2  | 0.8  | 240 | 1600 | 3200 | 4.77 | 0.1922 | 0.2078 | 0.7922 | 0.8078 | 185 | 1552 | 3263 | 216 | 1646 | 3138 | 19.29 | 5.22  |
| 5000 | 0.80 | 0.25 | 0.75 | 250 | 1875 | 2813 | 7.69 | 0.2415 | 0.2585 | 0.7415 | 0.7585 | 292 | 1832 | 2877 | 334 | 1917 | 2749 | 8.39  | 23.52 |
| 5000 | 0.81 | 0.25 | 0.75 | 253 | 1875 | 2813 | 6.91 | 0.2415 | 0.2585 | 0.7415 | 0.7585 | 292 | 1832 | 2877 | 334 | 1917 | 2749 | 7.53  | 21.98 |
| 5000 | 0.82 | 0.25 | 0.75 | 256 | 1875 | 2813 | 6.17 | 0.2415 | 0.2585 | 0.7415 | 0.7585 | 292 | 1832 | 2877 | 334 | 1917 | 2749 | 6.74  | 20.50 |

|      |      |      |      |     |      |      |      |        |        |        |        |     |      |      |     |      |      |       |       |
|------|------|------|------|-----|------|------|------|--------|--------|--------|--------|-----|------|------|-----|------|------|-------|-------|
| 5000 | 0.83 | 0.25 | 0.75 | 259 | 1875 | 2813 | 5.48 | 0.2415 | 0.2585 | 0.7415 | 0.7585 | 292 | 1832 | 2877 | 334 | 1917 | 2749 | 6.01  | 19.07 |
| 5000 | 0.84 | 0.25 | 0.75 | 263 | 1875 | 2813 | 4.83 | 0.2415 | 0.2585 | 0.7415 | 0.7585 | 292 | 1832 | 2877 | 334 | 1917 | 2749 | 5.35  | 17.70 |
| 5000 | 0.85 | 0.25 | 0.75 | 266 | 1875 | 2813 | 4.23 | 0.2415 | 0.2585 | 0.7415 | 0.7585 | 292 | 1832 | 2877 | 334 | 1917 | 2749 | 4.76  | 16.39 |
| 5000 | 0.86 | 0.25 | 0.75 | 269 | 1875 | 2813 | 3.67 | 0.2415 | 0.2585 | 0.7415 | 0.7585 | 292 | 1832 | 2877 | 334 | 1917 | 2749 | 4.24  | 15.14 |
| 5000 | 0.87 | 0.25 | 0.75 | 272 | 1875 | 2813 | 3.15 | 0.2415 | 0.2585 | 0.7415 | 0.7585 | 292 | 1832 | 2877 | 334 | 1917 | 2749 | 3.78  | 13.95 |
| 5000 | 0.88 | 0.25 | 0.75 | 275 | 1875 | 2813 | 2.67 | 0.2415 | 0.2585 | 0.7415 | 0.7585 | 292 | 1832 | 2877 | 334 | 1917 | 2749 | 3.39  | 12.81 |
| 5000 | 0.89 | 0.25 | 0.75 | 278 | 1875 | 2813 | 2.23 | 0.2415 | 0.2585 | 0.7415 | 0.7585 | 292 | 1832 | 2877 | 334 | 1917 | 2749 | 3.07  | 11.74 |
| 5000 | 0.90 | 0.25 | 0.75 | 281 | 1875 | 2813 | 1.84 | 0.2415 | 0.2585 | 0.7415 | 0.7585 | 292 | 1832 | 2877 | 334 | 1917 | 2749 | 2.81  | 10.72 |
| 5000 | 0.91 | 0.25 | 0.75 | 284 | 1875 | 2813 | 1.48 | 0.2415 | 0.2585 | 0.7415 | 0.7585 | 292 | 1832 | 2877 | 334 | 1917 | 2749 | 2.62  | 9.76  |
| 5000 | 0.92 | 0.25 | 0.75 | 288 | 1875 | 2813 | 1.17 | 0.2415 | 0.2585 | 0.7415 | 0.7585 | 292 | 1832 | 2877 | 334 | 1917 | 2749 | 2.50  | 8.86  |
| 5000 | 0.93 | 0.25 | 0.75 | 291 | 1875 | 2813 | 0.89 | 0.2415 | 0.2585 | 0.7415 | 0.7585 | 292 | 1832 | 2877 | 334 | 1917 | 2749 | 2.44  | 8.02  |
| 5000 | 0.94 | 0.25 | 0.75 | 294 | 1875 | 2813 | 0.65 | 0.2415 | 0.2585 | 0.7415 | 0.7585 | 292 | 1832 | 2877 | 334 | 1917 | 2749 | 2.46  | 7.23  |
| 5000 | 0.95 | 0.25 | 0.75 | 297 | 1875 | 2813 | 0.45 | 0.2415 | 0.2585 | 0.7415 | 0.7585 | 292 | 1832 | 2877 | 334 | 1917 | 2749 | 2.54  | 6.51  |
| 5000 | 0.96 | 0.25 | 0.75 | 300 | 1875 | 2813 | 0.29 | 0.2415 | 0.2585 | 0.7415 | 0.7585 | 292 | 1832 | 2877 | 334 | 1917 | 2749 | 2.68  | 5.84  |
| 5000 | 0.97 | 0.25 | 0.75 | 303 | 1875 | 2813 | 0.16 | 0.2415 | 0.2585 | 0.7415 | 0.7585 | 292 | 1832 | 2877 | 334 | 1917 | 2749 | 2.89  | 5.23  |
| 5000 | 0.98 | 0.25 | 0.75 | 306 | 1875 | 2813 | 0.07 | 0.2415 | 0.2585 | 0.7415 | 0.7585 | 292 | 1832 | 2877 | 334 | 1917 | 2749 | 3.17  | 4.68  |
| 5000 | 0.99 | 0.25 | 0.75 | 309 | 1875 | 2813 | 0.02 | 0.2415 | 0.2585 | 0.7415 | 0.7585 | 292 | 1832 | 2877 | 334 | 1917 | 2749 | 3.52  | 4.19  |
| 5000 | 1.00 | 0.25 | 0.75 | 313 | 1875 | 2813 | 0.00 | 0.2415 | 0.2585 | 0.7415 | 0.7585 | 292 | 1832 | 2877 | 334 | 1917 | 2749 | 3.93  | 3.76  |
| 5000 | 1.01 | 0.25 | 0.75 | 316 | 1875 | 2813 | 0.02 | 0.2415 | 0.2585 | 0.7415 | 0.7585 | 292 | 1832 | 2877 | 334 | 1917 | 2749 | 4.41  | 3.38  |
| 5000 | 1.02 | 0.25 | 0.75 | 319 | 1875 | 2813 | 0.07 | 0.2415 | 0.2585 | 0.7415 | 0.7585 | 292 | 1832 | 2877 | 334 | 1917 | 2749 | 4.96  | 3.07  |
| 5000 | 1.03 | 0.25 | 0.75 | 322 | 1875 | 2813 | 0.16 | 0.2415 | 0.2585 | 0.7415 | 0.7585 | 292 | 1832 | 2877 | 334 | 1917 | 2749 | 5.58  | 2.81  |
| 5000 | 1.04 | 0.25 | 0.75 | 325 | 1875 | 2813 | 0.28 | 0.2415 | 0.2585 | 0.7415 | 0.7585 | 292 | 1832 | 2877 | 334 | 1917 | 2749 | 6.26  | 2.61  |
| 5000 | 1.05 | 0.25 | 0.75 | 328 | 1875 | 2813 | 0.43 | 0.2415 | 0.2585 | 0.7415 | 0.7585 | 292 | 1832 | 2877 | 334 | 1917 | 2749 | 7.00  | 2.47  |
| 5000 | 1.06 | 0.25 | 0.75 | 331 | 1875 | 2813 | 0.62 | 0.2415 | 0.2585 | 0.7415 | 0.7585 | 292 | 1832 | 2877 | 334 | 1917 | 2749 | 7.82  | 2.39  |
| 5000 | 1.07 | 0.25 | 0.75 | 334 | 1875 | 2813 | 0.84 | 0.2415 | 0.2585 | 0.7415 | 0.7585 | 292 | 1832 | 2877 | 334 | 1917 | 2749 | 8.70  | 2.37  |
| 5000 | 1.08 | 0.25 | 0.75 | 338 | 1875 | 2813 | 1.09 | 0.2415 | 0.2585 | 0.7415 | 0.7585 | 292 | 1832 | 2877 | 334 | 1917 | 2749 | 9.65  | 2.40  |
| 5000 | 1.09 | 0.25 | 0.75 | 341 | 1875 | 2813 | 1.37 | 0.2415 | 0.2585 | 0.7415 | 0.7585 | 292 | 1832 | 2877 | 334 | 1917 | 2749 | 10.67 | 2.49  |
| 5000 | 1.10 | 0.25 | 0.75 | 344 | 1875 | 2813 | 1.68 | 0.2415 | 0.2585 | 0.7415 | 0.7585 | 292 | 1832 | 2877 | 334 | 1917 | 2749 | 11.75 | 2.65  |
| 5000 | 1.11 | 0.25 | 0.75 | 347 | 1875 | 2813 | 2.03 | 0.2415 | 0.2585 | 0.7415 | 0.7585 | 292 | 1832 | 2877 | 334 | 1917 | 2749 | 12.90 | 2.86  |
| 5000 | 1.12 | 0.25 | 0.75 | 350 | 1875 | 2813 | 2.40 | 0.2415 | 0.2585 | 0.7415 | 0.7585 | 292 | 1832 | 2877 | 334 | 1917 | 2749 | 14.12 | 3.12  |
| 5000 | 1.13 | 0.25 | 0.75 | 353 | 1875 | 2813 | 2.81 | 0.2415 | 0.2585 | 0.7415 | 0.7585 | 292 | 1832 | 2877 | 334 | 1917 | 2749 | 15.40 | 3.45  |
| 5000 | 1.14 | 0.25 | 0.75 | 356 | 1875 | 2813 | 3.24 | 0.2415 | 0.2585 | 0.7415 | 0.7585 | 292 | 1832 | 2877 | 334 | 1917 | 2749 | 16.75 | 3.84  |
| 5000 | 1.15 | 0.25 | 0.75 | 359 | 1875 | 2813 | 3.71 | 0.2415 | 0.2585 | 0.7415 | 0.7585 | 292 | 1832 | 2877 | 334 | 1917 | 2749 | 18.17 | 4.28  |
| 5000 | 1.16 | 0.25 | 0.75 | 363 | 1875 | 2813 | 4.20 | 0.2415 | 0.2585 | 0.7415 | 0.7585 | 292 | 1832 | 2877 | 334 | 1917 | 2749 | 19.66 | 4.78  |
| 5000 | 1.17 | 0.25 | 0.75 | 366 | 1875 | 2813 | 4.72 | 0.2415 | 0.2585 | 0.7415 | 0.7585 | 292 | 1832 | 2877 | 334 | 1917 | 2749 | 21.21 | 5.34  |

|      |      |      |      |     |      |      |      |        |        |        |        |     |      |      |     |      |      |       |       |
|------|------|------|------|-----|------|------|------|--------|--------|--------|--------|-----|------|------|-----|------|------|-------|-------|
| 5000 | 1.18 | 0.25 | 0.75 | 369 | 1875 | 2813 | 5.27 | 0.2415 | 0.2585 | 0.7415 | 0.7585 | 292 | 1832 | 2877 | 334 | 1917 | 2749 | 22.83 | 5.96  |
| 5000 | 1.19 | 0.25 | 0.75 | 372 | 1875 | 2813 | 5.85 | 0.2415 | 0.2585 | 0.7415 | 0.7585 | 292 | 1832 | 2877 | 334 | 1917 | 2749 | 24.51 | 6.64  |
| 5000 | 1.20 | 0.25 | 0.75 | 375 | 1875 | 2813 | 6.46 | 0.2415 | 0.2585 | 0.7415 | 0.7585 | 292 | 1832 | 2877 | 334 | 1917 | 2749 | 26.27 | 7.38  |
| 5000 | 0.80 | 0.3  | 0.7  | 360 | 2100 | 2450 | 9.80 | 0.2910 | 0.3090 | 0.6910 | 0.7090 | 423 | 2063 | 2513 | 477 | 2135 | 2388 | 11.76 | 31.06 |
| 5000 | 0.81 | 0.3  | 0.7  | 365 | 2100 | 2450 | 8.80 | 0.2910 | 0.3090 | 0.6910 | 0.7090 | 423 | 2063 | 2513 | 477 | 2135 | 2388 | 10.46 | 28.89 |
| 5000 | 0.82 | 0.3  | 0.7  | 369 | 2100 | 2450 | 7.85 | 0.2910 | 0.3090 | 0.6910 | 0.7090 | 423 | 2063 | 2513 | 477 | 2135 | 2388 | 9.25  | 26.81 |
| 5000 | 0.83 | 0.3  | 0.7  | 374 | 2100 | 2450 | 6.97 | 0.2910 | 0.3090 | 0.6910 | 0.7090 | 423 | 2063 | 2513 | 477 | 2135 | 2388 | 8.14  | 24.80 |
| 5000 | 0.84 | 0.3  | 0.7  | 378 | 2100 | 2450 | 6.14 | 0.2910 | 0.3090 | 0.6910 | 0.7090 | 423 | 2063 | 2513 | 477 | 2135 | 2388 | 7.13  | 22.89 |
| 5000 | 0.85 | 0.3  | 0.7  | 383 | 2100 | 2450 | 5.37 | 0.2910 | 0.3090 | 0.6910 | 0.7090 | 423 | 2063 | 2513 | 477 | 2135 | 2388 | 6.21  | 21.06 |
| 5000 | 0.86 | 0.3  | 0.7  | 387 | 2100 | 2450 | 4.65 | 0.2910 | 0.3090 | 0.6910 | 0.7090 | 423 | 2063 | 2513 | 477 | 2135 | 2388 | 5.39  | 19.31 |
| 5000 | 0.87 | 0.3  | 0.7  | 392 | 2100 | 2450 | 3.99 | 0.2910 | 0.3090 | 0.6910 | 0.7090 | 423 | 2063 | 2513 | 477 | 2135 | 2388 | 4.66  | 17.65 |
| 5000 | 0.88 | 0.3  | 0.7  | 396 | 2100 | 2450 | 3.38 | 0.2910 | 0.3090 | 0.6910 | 0.7090 | 423 | 2063 | 2513 | 477 | 2135 | 2388 | 4.03  | 16.08 |
| 5000 | 0.89 | 0.3  | 0.7  | 401 | 2100 | 2450 | 2.83 | 0.2910 | 0.3090 | 0.6910 | 0.7090 | 423 | 2063 | 2513 | 477 | 2135 | 2388 | 3.49  | 14.58 |
| 5000 | 0.90 | 0.3  | 0.7  | 405 | 2100 | 2450 | 2.32 | 0.2910 | 0.3090 | 0.6910 | 0.7090 | 423 | 2063 | 2513 | 477 | 2135 | 2388 | 3.05  | 13.18 |
| 5000 | 0.91 | 0.3  | 0.7  | 410 | 2100 | 2450 | 1.87 | 0.2910 | 0.3090 | 0.6910 | 0.7090 | 423 | 2063 | 2513 | 477 | 2135 | 2388 | 2.71  | 11.86 |
| 5000 | 0.92 | 0.3  | 0.7  | 414 | 2100 | 2450 | 1.47 | 0.2910 | 0.3090 | 0.6910 | 0.7090 | 423 | 2063 | 2513 | 477 | 2135 | 2388 | 2.46  | 10.62 |
| 5000 | 0.93 | 0.3  | 0.7  | 419 | 2100 | 2450 | 1.12 | 0.2910 | 0.3090 | 0.6910 | 0.7090 | 423 | 2063 | 2513 | 477 | 2135 | 2388 | 2.31  | 9.47  |
| 5000 | 0.94 | 0.3  | 0.7  | 423 | 2100 | 2450 | 0.82 | 0.2910 | 0.3090 | 0.6910 | 0.7090 | 423 | 2063 | 2513 | 477 | 2135 | 2388 | 2.25  | 8.40  |
| 5000 | 0.95 | 0.3  | 0.7  | 428 | 2100 | 2450 | 0.57 | 0.2910 | 0.3090 | 0.6910 | 0.7090 | 423 | 2063 | 2513 | 477 | 2135 | 2388 | 2.29  | 7.42  |
| 5000 | 0.96 | 0.3  | 0.7  | 432 | 2100 | 2450 | 0.36 | 0.2910 | 0.3090 | 0.6910 | 0.7090 | 423 | 2063 | 2513 | 477 | 2135 | 2388 | 2.42  | 6.52  |
| 5000 | 0.97 | 0.3  | 0.7  | 437 | 2100 | 2450 | 0.20 | 0.2910 | 0.3090 | 0.6910 | 0.7090 | 423 | 2063 | 2513 | 477 | 2135 | 2388 | 2.65  | 5.71  |
| 5000 | 0.98 | 0.3  | 0.7  | 441 | 2100 | 2450 | 0.09 | 0.2910 | 0.3090 | 0.6910 | 0.7090 | 423 | 2063 | 2513 | 477 | 2135 | 2388 | 2.97  | 4.98  |
| 5000 | 0.99 | 0.3  | 0.7  | 446 | 2100 | 2450 | 0.02 | 0.2910 | 0.3090 | 0.6910 | 0.7090 | 423 | 2063 | 2513 | 477 | 2135 | 2388 | 3.39  | 4.34  |
| 5000 | 1.00 | 0.3  | 0.7  | 450 | 2100 | 2450 | 0.00 | 0.2910 | 0.3090 | 0.6910 | 0.7090 | 423 | 2063 | 2513 | 477 | 2135 | 2388 | 3.91  | 3.78  |
| 5000 | 1.01 | 0.3  | 0.7  | 455 | 2100 | 2450 | 0.02 | 0.2910 | 0.3090 | 0.6910 | 0.7090 | 423 | 2063 | 2513 | 477 | 2135 | 2388 | 4.52  | 3.31  |
| 5000 | 1.02 | 0.3  | 0.7  | 459 | 2100 | 2450 | 0.09 | 0.2910 | 0.3090 | 0.6910 | 0.7090 | 423 | 2063 | 2513 | 477 | 2135 | 2388 | 5.23  | 2.92  |
| 5000 | 1.03 | 0.3  | 0.7  | 464 | 2100 | 2450 | 0.20 | 0.2910 | 0.3090 | 0.6910 | 0.7090 | 423 | 2063 | 2513 | 477 | 2135 | 2388 | 6.03  | 2.61  |
| 5000 | 1.04 | 0.3  | 0.7  | 468 | 2100 | 2450 | 0.35 | 0.2910 | 0.3090 | 0.6910 | 0.7090 | 423 | 2063 | 2513 | 477 | 2135 | 2388 | 6.93  | 2.40  |
| 5000 | 1.05 | 0.3  | 0.7  | 473 | 2100 | 2450 | 0.54 | 0.2910 | 0.3090 | 0.6910 | 0.7090 | 423 | 2063 | 2513 | 477 | 2135 | 2388 | 7.93  | 2.26  |
| 5000 | 1.06 | 0.3  | 0.7  | 477 | 2100 | 2450 | 0.77 | 0.2910 | 0.3090 | 0.6910 | 0.7090 | 423 | 2063 | 2513 | 477 | 2135 | 2388 | 9.02  | 2.21  |
| 5000 | 1.07 | 0.3  | 0.7  | 482 | 2100 | 2450 | 1.04 | 0.2910 | 0.3090 | 0.6910 | 0.7090 | 423 | 2063 | 2513 | 477 | 2135 | 2388 | 10.20 | 2.25  |
| 5000 | 1.08 | 0.3  | 0.7  | 486 | 2100 | 2450 | 1.36 | 0.2910 | 0.3090 | 0.6910 | 0.7090 | 423 | 2063 | 2513 | 477 | 2135 | 2388 | 11.48 | 2.37  |
| 5000 | 1.09 | 0.3  | 0.7  | 491 | 2100 | 2450 | 1.71 | 0.2910 | 0.3090 | 0.6910 | 0.7090 | 423 | 2063 | 2513 | 477 | 2135 | 2388 | 12.86 | 2.57  |
| 5000 | 1.10 | 0.3  | 0.7  | 495 | 2100 | 2450 | 2.10 | 0.2910 | 0.3090 | 0.6910 | 0.7090 | 423 | 2063 | 2513 | 477 | 2135 | 2388 | 14.33 | 2.86  |
| 5000 | 1.11 | 0.3  | 0.7  | 500 | 2100 | 2450 | 2.53 | 0.2910 | 0.3090 | 0.6910 | 0.7090 | 423 | 2063 | 2513 | 477 | 2135 | 2388 | 15.90 | 3.24  |

|      |      |      |      |     |      |      |       |        |        |        |        |     |      |      |     |      |      |       |       |
|------|------|------|------|-----|------|------|-------|--------|--------|--------|--------|-----|------|------|-----|------|------|-------|-------|
| 5000 | 1.12 | 0.3  | 0.7  | 504 | 2100 | 2450 | 2.99  | 0.2910 | 0.3090 | 0.6910 | 0.7090 | 423 | 2063 | 2513 | 477 | 2135 | 2388 | 17.57 | 3.70  |
| 5000 | 1.13 | 0.3  | 0.7  | 509 | 2100 | 2450 | 3.49  | 0.2910 | 0.3090 | 0.6910 | 0.7090 | 423 | 2063 | 2513 | 477 | 2135 | 2388 | 19.33 | 4.25  |
| 5000 | 1.14 | 0.3  | 0.7  | 513 | 2100 | 2450 | 4.03  | 0.2910 | 0.3090 | 0.6910 | 0.7090 | 423 | 2063 | 2513 | 477 | 2135 | 2388 | 21.18 | 4.87  |
| 5000 | 1.15 | 0.3  | 0.7  | 518 | 2100 | 2450 | 4.60  | 0.2910 | 0.3090 | 0.6910 | 0.7090 | 423 | 2063 | 2513 | 477 | 2135 | 2388 | 23.13 | 5.59  |
| 5000 | 1.16 | 0.3  | 0.7  | 522 | 2100 | 2450 | 5.21  | 0.2910 | 0.3090 | 0.6910 | 0.7090 | 423 | 2063 | 2513 | 477 | 2135 | 2388 | 25.18 | 6.39  |
| 5000 | 1.17 | 0.3  | 0.7  | 527 | 2100 | 2450 | 5.86  | 0.2910 | 0.3090 | 0.6910 | 0.7090 | 423 | 2063 | 2513 | 477 | 2135 | 2388 | 27.32 | 7.27  |
| 5000 | 1.18 | 0.3  | 0.7  | 531 | 2100 | 2450 | 6.54  | 0.2910 | 0.3090 | 0.6910 | 0.7090 | 423 | 2063 | 2513 | 477 | 2135 | 2388 | 29.56 | 8.24  |
| 5000 | 1.19 | 0.3  | 0.7  | 536 | 2100 | 2450 | 7.25  | 0.2910 | 0.3090 | 0.6910 | 0.7090 | 423 | 2063 | 2513 | 477 | 2135 | 2388 | 31.89 | 9.30  |
| 5000 | 1.20 | 0.3  | 0.7  | 540 | 2100 | 2450 | 7.99  | 0.2910 | 0.3090 | 0.6910 | 0.7090 | 423 | 2063 | 2513 | 477 | 2135 | 2388 | 34.32 | 10.44 |
| 5000 | 0.80 | 0.35 | 0.65 | 490 | 2275 | 2113 | 11.67 | 0.3407 | 0.3593 | 0.6407 | 0.6593 | 580 | 2246 | 2174 | 646 | 2302 | 2052 | 16.12 | 39.62 |
| 5000 | 0.81 | 0.35 | 0.65 | 496 | 2275 | 2113 | 10.47 | 0.3407 | 0.3593 | 0.6407 | 0.6593 | 580 | 2246 | 2174 | 646 | 2302 | 2052 | 14.28 | 36.73 |
| 5000 | 0.82 | 0.35 | 0.65 | 502 | 2275 | 2113 | 9.34  | 0.3407 | 0.3593 | 0.6407 | 0.6593 | 580 | 2246 | 2174 | 646 | 2302 | 2052 | 12.57 | 33.95 |
| 5000 | 0.83 | 0.35 | 0.65 | 508 | 2275 | 2113 | 8.28  | 0.3407 | 0.3593 | 0.6407 | 0.6593 | 580 | 2246 | 2174 | 646 | 2302 | 2052 | 10.99 | 31.28 |
| 5000 | 0.84 | 0.35 | 0.65 | 515 | 2275 | 2113 | 7.29  | 0.3407 | 0.3593 | 0.6407 | 0.6593 | 580 | 2246 | 2174 | 646 | 2302 | 2052 | 9.54  | 28.74 |
| 5000 | 0.85 | 0.35 | 0.65 | 521 | 2275 | 2113 | 6.37  | 0.3407 | 0.3593 | 0.6407 | 0.6593 | 580 | 2246 | 2174 | 646 | 2302 | 2052 | 8.22  | 26.31 |
| 5000 | 0.86 | 0.35 | 0.65 | 527 | 2275 | 2113 | 5.51  | 0.3407 | 0.3593 | 0.6407 | 0.6593 | 580 | 2246 | 2174 | 646 | 2302 | 2052 | 7.02  | 23.99 |
| 5000 | 0.87 | 0.35 | 0.65 | 533 | 2275 | 2113 | 4.72  | 0.3407 | 0.3593 | 0.6407 | 0.6593 | 580 | 2246 | 2174 | 646 | 2302 | 2052 | 5.96  | 21.79 |
| 5000 | 0.88 | 0.35 | 0.65 | 539 | 2275 | 2113 | 4.00  | 0.3407 | 0.3593 | 0.6407 | 0.6593 | 580 | 2246 | 2174 | 646 | 2302 | 2052 | 5.02  | 19.71 |
| 5000 | 0.89 | 0.35 | 0.65 | 545 | 2275 | 2113 | 3.34  | 0.3407 | 0.3593 | 0.6407 | 0.6593 | 580 | 2246 | 2174 | 646 | 2302 | 2052 | 4.22  | 17.75 |
| 5000 | 0.90 | 0.35 | 0.65 | 551 | 2275 | 2113 | 2.74  | 0.3407 | 0.3593 | 0.6407 | 0.6593 | 580 | 2246 | 2174 | 646 | 2302 | 2052 | 3.54  | 15.90 |
| 5000 | 0.91 | 0.35 | 0.65 | 557 | 2275 | 2113 | 2.21  | 0.3407 | 0.3593 | 0.6407 | 0.6593 | 580 | 2246 | 2174 | 646 | 2302 | 2052 | 2.99  | 14.17 |
| 5000 | 0.92 | 0.35 | 0.65 | 564 | 2275 | 2113 | 1.74  | 0.3407 | 0.3593 | 0.6407 | 0.6593 | 580 | 2246 | 2174 | 646 | 2302 | 2052 | 2.58  | 12.55 |
| 5000 | 0.93 | 0.35 | 0.65 | 570 | 2275 | 2113 | 1.32  | 0.3407 | 0.3593 | 0.6407 | 0.6593 | 580 | 2246 | 2174 | 646 | 2302 | 2052 | 2.29  | 11.05 |
| 5000 | 0.94 | 0.35 | 0.65 | 576 | 2275 | 2113 | 0.96  | 0.3407 | 0.3593 | 0.6407 | 0.6593 | 580 | 2246 | 2174 | 646 | 2302 | 2052 | 2.13  | 9.66  |
| 5000 | 0.95 | 0.35 | 0.65 | 582 | 2275 | 2113 | 0.67  | 0.3407 | 0.3593 | 0.6407 | 0.6593 | 580 | 2246 | 2174 | 646 | 2302 | 2052 | 2.10  | 8.40  |
| 5000 | 0.96 | 0.35 | 0.65 | 588 | 2275 | 2113 | 0.42  | 0.3407 | 0.3593 | 0.6407 | 0.6593 | 580 | 2246 | 2174 | 646 | 2302 | 2052 | 2.20  | 7.24  |
| 5000 | 0.97 | 0.35 | 0.65 | 594 | 2275 | 2113 | 0.24  | 0.3407 | 0.3593 | 0.6407 | 0.6593 | 580 | 2246 | 2174 | 646 | 2302 | 2052 | 2.43  | 6.21  |
| 5000 | 0.98 | 0.35 | 0.65 | 600 | 2275 | 2113 | 0.10  | 0.3407 | 0.3593 | 0.6407 | 0.6593 | 580 | 2246 | 2174 | 646 | 2302 | 2052 | 2.79  | 5.29  |
| 5000 | 0.99 | 0.35 | 0.65 | 606 | 2275 | 2113 | 0.03  | 0.3407 | 0.3593 | 0.6407 | 0.6593 | 580 | 2246 | 2174 | 646 | 2302 | 2052 | 3.27  | 4.48  |
| 5000 | 1.00 | 0.35 | 0.65 | 613 | 2275 | 2113 | 0.00  | 0.3407 | 0.3593 | 0.6407 | 0.6593 | 580 | 2246 | 2174 | 646 | 2302 | 2052 | 3.89  | 3.80  |
| 5000 | 1.01 | 0.35 | 0.65 | 619 | 2275 | 2113 | 0.03  | 0.3407 | 0.3593 | 0.6407 | 0.6593 | 580 | 2246 | 2174 | 646 | 2302 | 2052 | 4.64  | 3.23  |
| 5000 | 1.02 | 0.35 | 0.65 | 625 | 2275 | 2113 | 0.10  | 0.3407 | 0.3593 | 0.6407 | 0.6593 | 580 | 2246 | 2174 | 646 | 2302 | 2052 | 5.51  | 2.77  |
| 5000 | 1.03 | 0.35 | 0.65 | 631 | 2275 | 2113 | 0.23  | 0.3407 | 0.3593 | 0.6407 | 0.6593 | 580 | 2246 | 2174 | 646 | 2302 | 2052 | 6.52  | 2.43  |
| 5000 | 1.04 | 0.35 | 0.65 | 637 | 2275 | 2113 | 0.40  | 0.3407 | 0.3593 | 0.6407 | 0.6593 | 580 | 2246 | 2174 | 646 | 2302 | 2052 | 7.65  | 2.21  |
| 5000 | 1.05 | 0.35 | 0.65 | 643 | 2275 | 2113 | 0.63  | 0.3407 | 0.3593 | 0.6407 | 0.6593 | 580 | 2246 | 2174 | 646 | 2302 | 2052 | 8.92  | 2.10  |



|      |      |      |      |     |      |      |       |        |        |        |        |     |      |      |     |      |      |       |       |
|------|------|------|------|-----|------|------|-------|--------|--------|--------|--------|-----|------|------|-----|------|------|-------|-------|
| 5000 | 1.06 | 0.35 | 0.65 | 649 | 2275 | 2113 | 0.90  | 0.3407 | 0.3593 | 0.6407 | 0.6593 | 580 | 2246 | 2174 | 646 | 2302 | 2052 | 10.31 | 2.11  |
| 5000 | 1.07 | 0.35 | 0.65 | 655 | 2275 | 2113 | 1.22  | 0.3407 | 0.3593 | 0.6407 | 0.6593 | 580 | 2246 | 2174 | 646 | 2302 | 2052 | 11.83 | 2.24  |
| 5000 | 1.08 | 0.35 | 0.65 | 662 | 2275 | 2113 | 1.58  | 0.3407 | 0.3593 | 0.6407 | 0.6593 | 580 | 2246 | 2174 | 646 | 2302 | 2052 | 13.48 | 2.48  |
| 5000 | 1.09 | 0.35 | 0.65 | 668 | 2275 | 2113 | 1.99  | 0.3407 | 0.3593 | 0.6407 | 0.6593 | 580 | 2246 | 2174 | 646 | 2302 | 2052 | 15.26 | 2.84  |
| 5000 | 1.10 | 0.35 | 0.65 | 674 | 2275 | 2113 | 2.45  | 0.3407 | 0.3593 | 0.6407 | 0.6593 | 580 | 2246 | 2174 | 646 | 2302 | 2052 | 17.17 | 3.32  |
| 5000 | 1.11 | 0.35 | 0.65 | 680 | 2275 | 2113 | 2.94  | 0.3407 | 0.3593 | 0.6407 | 0.6593 | 580 | 2246 | 2174 | 646 | 2302 | 2052 | 19.21 | 3.91  |
| 5000 | 1.12 | 0.35 | 0.65 | 686 | 2275 | 2113 | 3.48  | 0.3407 | 0.3593 | 0.6407 | 0.6593 | 580 | 2246 | 2174 | 646 | 2302 | 2052 | 21.38 | 4.61  |
| 5000 | 1.13 | 0.35 | 0.65 | 692 | 2275 | 2113 | 4.06  | 0.3407 | 0.3593 | 0.6407 | 0.6593 | 580 | 2246 | 2174 | 646 | 2302 | 2052 | 23.68 | 5.44  |
| 5000 | 1.14 | 0.35 | 0.65 | 698 | 2275 | 2113 | 4.69  | 0.3407 | 0.3593 | 0.6407 | 0.6593 | 580 | 2246 | 2174 | 646 | 2302 | 2052 | 26.11 | 6.38  |
| 5000 | 1.15 | 0.35 | 0.65 | 704 | 2275 | 2113 | 5.35  | 0.3407 | 0.3593 | 0.6407 | 0.6593 | 580 | 2246 | 2174 | 646 | 2302 | 2052 | 28.66 | 7.43  |
| 5000 | 1.16 | 0.35 | 0.65 | 711 | 2275 | 2113 | 6.06  | 0.3407 | 0.3593 | 0.6407 | 0.6593 | 580 | 2246 | 2174 | 646 | 2302 | 2052 | 31.35 | 8.61  |
| 5000 | 1.17 | 0.35 | 0.65 | 717 | 2275 | 2113 | 6.80  | 0.3407 | 0.3593 | 0.6407 | 0.6593 | 580 | 2246 | 2174 | 646 | 2302 | 2052 | 34.16 | 9.89  |
| 5000 | 1.18 | 0.35 | 0.65 | 723 | 2275 | 2113 | 7.58  | 0.3407 | 0.3593 | 0.6407 | 0.6593 | 580 | 2246 | 2174 | 646 | 2302 | 2052 | 37.11 | 11.30 |
| 5000 | 1.19 | 0.35 | 0.65 | 729 | 2275 | 2113 | 8.40  | 0.3407 | 0.3593 | 0.6407 | 0.6593 | 580 | 2246 | 2174 | 646 | 2302 | 2052 | 40.18 | 12.82 |
| 5000 | 1.20 | 0.35 | 0.65 | 735 | 2275 | 2113 | 9.26  | 0.3407 | 0.3593 | 0.6407 | 0.6593 | 580 | 2246 | 2174 | 646 | 2302 | 2052 | 43.39 | 14.46 |
| 5000 | 0.80 | 0.4  | 0.6  | 640 | 2400 | 1800 | 13.18 | 0.3904 | 0.4096 | 0.5904 | 0.6096 | 762 | 2380 | 1858 | 839 | 2418 | 1743 | 21.53 | 49.16 |
| 5000 | 0.81 | 0.4  | 0.6  | 648 | 2400 | 1800 | 11.81 | 0.3904 | 0.4096 | 0.5904 | 0.6096 | 762 | 2380 | 1858 | 839 | 2418 | 1743 | 19.06 | 45.44 |
| 5000 | 0.82 | 0.4  | 0.6  | 656 | 2400 | 1800 | 10.52 | 0.3904 | 0.4096 | 0.5904 | 0.6096 | 762 | 2380 | 1858 | 839 | 2418 | 1743 | 16.74 | 41.88 |
| 5000 | 0.83 | 0.4  | 0.6  | 664 | 2400 | 1800 | 9.32  | 0.3904 | 0.4096 | 0.5904 | 0.6096 | 762 | 2380 | 1858 | 839 | 2418 | 1743 | 14.60 | 38.47 |
| 5000 | 0.84 | 0.4  | 0.6  | 672 | 2400 | 1800 | 8.20  | 0.3904 | 0.4096 | 0.5904 | 0.6096 | 762 | 2380 | 1858 | 839 | 2418 | 1743 | 12.63 | 35.21 |
| 5000 | 0.85 | 0.4  | 0.6  | 680 | 2400 | 1800 | 7.16  | 0.3904 | 0.4096 | 0.5904 | 0.6096 | 762 | 2380 | 1858 | 839 | 2418 | 1743 | 10.82 | 32.10 |
| 5000 | 0.86 | 0.4  | 0.6  | 688 | 2400 | 1800 | 6.19  | 0.3904 | 0.4096 | 0.5904 | 0.6096 | 762 | 2380 | 1858 | 839 | 2418 | 1743 | 9.18  | 29.15 |
| 5000 | 0.87 | 0.4  | 0.6  | 696 | 2400 | 1800 | 5.30  | 0.3904 | 0.4096 | 0.5904 | 0.6096 | 762 | 2380 | 1858 | 839 | 2418 | 1743 | 7.71  | 26.34 |
| 5000 | 0.88 | 0.4  | 0.6  | 704 | 2400 | 1800 | 4.49  | 0.3904 | 0.4096 | 0.5904 | 0.6096 | 762 | 2380 | 1858 | 839 | 2418 | 1743 | 6.41  | 23.70 |
| 5000 | 0.89 | 0.4  | 0.6  | 712 | 2400 | 1800 | 3.75  | 0.3904 | 0.4096 | 0.5904 | 0.6096 | 762 | 2380 | 1858 | 839 | 2418 | 1743 | 5.27  | 21.20 |
| 5000 | 0.90 | 0.4  | 0.6  | 720 | 2400 | 1800 | 3.08  | 0.3904 | 0.4096 | 0.5904 | 0.6096 | 762 | 2380 | 1858 | 839 | 2418 | 1743 | 4.31  | 18.86 |
| 5000 | 0.91 | 0.4  | 0.6  | 728 | 2400 | 1800 | 2.47  | 0.3904 | 0.4096 | 0.5904 | 0.6096 | 762 | 2380 | 1858 | 839 | 2418 | 1743 | 3.51  | 16.67 |
| 5000 | 0.92 | 0.4  | 0.6  | 736 | 2400 | 1800 | 1.94  | 0.3904 | 0.4096 | 0.5904 | 0.6096 | 762 | 2380 | 1858 | 839 | 2418 | 1743 | 2.88  | 14.63 |
| 5000 | 0.93 | 0.4  | 0.6  | 744 | 2400 | 1800 | 1.48  | 0.3904 | 0.4096 | 0.5904 | 0.6096 | 762 | 2380 | 1858 | 839 | 2418 | 1743 | 2.41  | 12.74 |
| 5000 | 0.94 | 0.4  | 0.6  | 752 | 2400 | 1800 | 1.08  | 0.3904 | 0.4096 | 0.5904 | 0.6096 | 762 | 2380 | 1858 | 839 | 2418 | 1743 | 2.12  | 11.01 |
| 5000 | 0.95 | 0.4  | 0.6  | 760 | 2400 | 1800 | 0.74  | 0.3904 | 0.4096 | 0.5904 | 0.6096 | 762 | 2380 | 1858 | 839 | 2418 | 1743 | 1.99  | 9.43  |
| 5000 | 0.96 | 0.4  | 0.6  | 768 | 2400 | 1800 | 0.47  | 0.3904 | 0.4096 | 0.5904 | 0.6096 | 762 | 2380 | 1858 | 839 | 2418 | 1743 | 2.03  | 8.00  |
| 5000 | 0.97 | 0.4  | 0.6  | 776 | 2400 | 1800 | 0.26  | 0.3904 | 0.4096 | 0.5904 | 0.6096 | 762 | 2380 | 1858 | 839 | 2418 | 1743 | 2.24  | 6.72  |
| 5000 | 0.98 | 0.4  | 0.6  | 784 | 2400 | 1800 | 0.12  | 0.3904 | 0.4096 | 0.5904 | 0.6096 | 762 | 2380 | 1858 | 839 | 2418 | 1743 | 2.62  | 5.60  |
| 5000 | 0.99 | 0.4  | 0.6  | 792 | 2400 | 1800 | 0.03  | 0.3904 | 0.4096 | 0.5904 | 0.6096 | 762 | 2380 | 1858 | 839 | 2418 | 1743 | 3.16  | 4.63  |

|      |      |      |      |     |      |      |       |        |        |        |        |     |      |      |      |      |      |       |       |
|------|------|------|------|-----|------|------|-------|--------|--------|--------|--------|-----|------|------|------|------|------|-------|-------|
| 5000 | 1.00 | 0.4  | 0.6  | 800 | 2400 | 1800 | 0.00  | 0.3904 | 0.4096 | 0.5904 | 0.6096 | 762 | 2380 | 1858 | 839  | 2418 | 1743 | 3.87  | 3.81  |
| 5000 | 1.01 | 0.4  | 0.6  | 808 | 2400 | 1800 | 0.03  | 0.3904 | 0.4096 | 0.5904 | 0.6096 | 762 | 2380 | 1858 | 839  | 2418 | 1743 | 4.76  | 3.15  |
| 5000 | 1.02 | 0.4  | 0.6  | 816 | 2400 | 1800 | 0.11  | 0.3904 | 0.4096 | 0.5904 | 0.6096 | 762 | 2380 | 1858 | 839  | 2418 | 1743 | 5.80  | 2.64  |
| 5000 | 1.03 | 0.4  | 0.6  | 824 | 2400 | 1800 | 0.25  | 0.3904 | 0.4096 | 0.5904 | 0.6096 | 762 | 2380 | 1858 | 839  | 2418 | 1743 | 7.02  | 2.28  |
| 5000 | 1.04 | 0.4  | 0.6  | 832 | 2400 | 1800 | 0.45  | 0.3904 | 0.4096 | 0.5904 | 0.6096 | 762 | 2380 | 1858 | 839  | 2418 | 1743 | 8.41  | 2.07  |
| 5000 | 1.05 | 0.4  | 0.6  | 840 | 2400 | 1800 | 0.70  | 0.3904 | 0.4096 | 0.5904 | 0.6096 | 762 | 2380 | 1858 | 839  | 2418 | 1743 | 9.96  | 2.01  |
| 5000 | 1.06 | 0.4  | 0.6  | 848 | 2400 | 1800 | 1.00  | 0.3904 | 0.4096 | 0.5904 | 0.6096 | 762 | 2380 | 1858 | 839  | 2418 | 1743 | 11.68 | 2.11  |
| 5000 | 1.07 | 0.4  | 0.6  | 856 | 2400 | 1800 | 1.35  | 0.3904 | 0.4096 | 0.5904 | 0.6096 | 762 | 2380 | 1858 | 839  | 2418 | 1743 | 13.57 | 2.36  |
| 5000 | 1.08 | 0.4  | 0.6  | 864 | 2400 | 1800 | 1.75  | 0.3904 | 0.4096 | 0.5904 | 0.6096 | 762 | 2380 | 1858 | 839  | 2418 | 1743 | 15.62 | 2.77  |
| 5000 | 1.09 | 0.4  | 0.6  | 872 | 2400 | 1800 | 2.20  | 0.3904 | 0.4096 | 0.5904 | 0.6096 | 762 | 2380 | 1858 | 839  | 2418 | 1743 | 17.85 | 3.32  |
| 5000 | 1.10 | 0.4  | 0.6  | 880 | 2400 | 1800 | 2.71  | 0.3904 | 0.4096 | 0.5904 | 0.6096 | 762 | 2380 | 1858 | 839  | 2418 | 1743 | 20.24 | 4.03  |
| 5000 | 1.11 | 0.4  | 0.6  | 888 | 2400 | 1800 | 3.25  | 0.3904 | 0.4096 | 0.5904 | 0.6096 | 762 | 2380 | 1858 | 839  | 2418 | 1743 | 22.80 | 4.89  |
| 5000 | 1.12 | 0.4  | 0.6  | 896 | 2400 | 1800 | 3.85  | 0.3904 | 0.4096 | 0.5904 | 0.6096 | 762 | 2380 | 1858 | 839  | 2418 | 1743 | 25.53 | 5.90  |
| 5000 | 1.13 | 0.4  | 0.6  | 904 | 2400 | 1800 | 4.49  | 0.3904 | 0.4096 | 0.5904 | 0.6096 | 762 | 2380 | 1858 | 839  | 2418 | 1743 | 28.43 | 7.07  |
| 5000 | 1.14 | 0.4  | 0.6  | 912 | 2400 | 1800 | 5.18  | 0.3904 | 0.4096 | 0.5904 | 0.6096 | 762 | 2380 | 1858 | 839  | 2418 | 1743 | 31.49 | 8.39  |
| 5000 | 1.15 | 0.4  | 0.6  | 920 | 2400 | 1800 | 5.91  | 0.3904 | 0.4096 | 0.5904 | 0.6096 | 762 | 2380 | 1858 | 839  | 2418 | 1743 | 34.72 | 9.86  |
| 5000 | 1.16 | 0.4  | 0.6  | 928 | 2400 | 1800 | 6.68  | 0.3904 | 0.4096 | 0.5904 | 0.6096 | 762 | 2380 | 1858 | 839  | 2418 | 1743 | 38.12 | 11.48 |
| 5000 | 1.17 | 0.4  | 0.6  | 936 | 2400 | 1800 | 7.50  | 0.3904 | 0.4096 | 0.5904 | 0.6096 | 762 | 2380 | 1858 | 839  | 2418 | 1743 | 41.69 | 13.26 |
| 5000 | 1.18 | 0.4  | 0.6  | 944 | 2400 | 1800 | 8.35  | 0.3904 | 0.4096 | 0.5904 | 0.6096 | 762 | 2380 | 1858 | 839  | 2418 | 1743 | 45.43 | 15.19 |
| 5000 | 1.19 | 0.4  | 0.6  | 952 | 2400 | 1800 | 9.25  | 0.3904 | 0.4096 | 0.5904 | 0.6096 | 762 | 2380 | 1858 | 839  | 2418 | 1743 | 49.33 | 17.27 |
| 5000 | 1.20 | 0.4  | 0.6  | 960 | 2400 | 1800 | 10.19 | 0.3904 | 0.4096 | 0.5904 | 0.6096 | 762 | 2380 | 1858 | 839  | 2418 | 1743 | 53.40 | 19.50 |
| 5000 | 0.80 | 0.45 | 0.55 | 810 | 2475 | 1513 | 14.20 | 0.4402 | 0.4598 | 0.5402 | 0.5598 | 969 | 2464 | 1567 | 1057 | 2484 | 1459 | 28.03 | 59.63 |
| 5000 | 0.81 | 0.45 | 0.55 | 820 | 2475 | 1513 | 12.71 | 0.4402 | 0.4598 | 0.5402 | 0.5598 | 969 | 2464 | 1567 | 1057 | 2484 | 1459 | 24.82 | 54.99 |
| 5000 | 0.82 | 0.45 | 0.55 | 830 | 2475 | 1513 | 11.32 | 0.4402 | 0.4598 | 0.5402 | 0.5598 | 969 | 2464 | 1567 | 1057 | 2484 | 1459 | 21.81 | 50.55 |
| 5000 | 0.83 | 0.45 | 0.55 | 840 | 2475 | 1513 | 10.02 | 0.4402 | 0.4598 | 0.5402 | 0.5598 | 969 | 2464 | 1567 | 1057 | 2484 | 1459 | 19.01 | 46.31 |
| 5000 | 0.84 | 0.45 | 0.55 | 851 | 2475 | 1513 | 8.81  | 0.4402 | 0.4598 | 0.5402 | 0.5598 | 969 | 2464 | 1567 | 1057 | 2484 | 1459 | 16.43 | 42.26 |
| 5000 | 0.85 | 0.45 | 0.55 | 861 | 2475 | 1513 | 7.68  | 0.4402 | 0.4598 | 0.5402 | 0.5598 | 969 | 2464 | 1567 | 1057 | 2484 | 1459 | 14.06 | 38.40 |
| 5000 | 0.86 | 0.45 | 0.55 | 871 | 2475 | 1513 | 6.64  | 0.4402 | 0.4598 | 0.5402 | 0.5598 | 969 | 2464 | 1567 | 1057 | 2484 | 1459 | 11.90 | 34.74 |
| 5000 | 0.87 | 0.45 | 0.55 | 881 | 2475 | 1513 | 5.69  | 0.4402 | 0.4598 | 0.5402 | 0.5598 | 969 | 2464 | 1567 | 1057 | 2484 | 1459 | 9.95  | 31.27 |
| 5000 | 0.88 | 0.45 | 0.55 | 891 | 2475 | 1513 | 4.81  | 0.4402 | 0.4598 | 0.5402 | 0.5598 | 969 | 2464 | 1567 | 1057 | 2484 | 1459 | 8.21  | 28.00 |
| 5000 | 0.89 | 0.45 | 0.55 | 901 | 2475 | 1513 | 4.01  | 0.4402 | 0.4598 | 0.5402 | 0.5598 | 969 | 2464 | 1567 | 1057 | 2484 | 1459 | 6.68  | 24.91 |
| 5000 | 0.90 | 0.45 | 0.55 | 911 | 2475 | 1513 | 3.29  | 0.4402 | 0.4598 | 0.5402 | 0.5598 | 969 | 2464 | 1567 | 1057 | 2484 | 1459 | 5.37  | 22.03 |
| 5000 | 0.91 | 0.45 | 0.55 | 921 | 2475 | 1513 | 2.65  | 0.4402 | 0.4598 | 0.5402 | 0.5598 | 969 | 2464 | 1567 | 1057 | 2484 | 1459 | 4.27  | 19.33 |
| 5000 | 0.92 | 0.45 | 0.55 | 932 | 2475 | 1513 | 2.08  | 0.4402 | 0.4598 | 0.5402 | 0.5598 | 969 | 2464 | 1567 | 1057 | 2484 | 1459 | 3.37  | 16.84 |
| 5000 | 0.93 | 0.45 | 0.55 | 942 | 2475 | 1513 | 1.58  | 0.4402 | 0.4598 | 0.5402 | 0.5598 | 969 | 2464 | 1567 | 1057 | 2484 | 1459 | 2.69  | 14.53 |

|      |      |      |      |      |      |      |       |        |        |        |        |      |      |      |      |      |      |       |       |
|------|------|------|------|------|------|------|-------|--------|--------|--------|--------|------|------|------|------|------|------|-------|-------|
| 5000 | 0.94 | 0.45 | 0.55 | 952  | 2475 | 1513 | 1.15  | 0.4402 | 0.4598 | 0.5402 | 0.5598 | 969  | 2464 | 1567 | 1057 | 2484 | 1459 | 2.23  | 12.42 |
| 5000 | 0.95 | 0.45 | 0.55 | 962  | 2475 | 1513 | 0.79  | 0.4402 | 0.4598 | 0.5402 | 0.5598 | 969  | 2464 | 1567 | 1057 | 2484 | 1459 | 1.97  | 10.50 |
| 5000 | 0.96 | 0.45 | 0.55 | 972  | 2475 | 1513 | 0.50  | 0.4402 | 0.4598 | 0.5402 | 0.5598 | 969  | 2464 | 1567 | 1057 | 2484 | 1459 | 1.92  | 8.78  |
| 5000 | 0.97 | 0.45 | 0.55 | 982  | 2475 | 1513 | 0.28  | 0.4402 | 0.4598 | 0.5402 | 0.5598 | 969  | 2464 | 1567 | 1057 | 2484 | 1459 | 2.09  | 7.25  |
| 5000 | 0.98 | 0.45 | 0.55 | 992  | 2475 | 1513 | 0.12  | 0.4402 | 0.4598 | 0.5402 | 0.5598 | 969  | 2464 | 1567 | 1057 | 2484 | 1459 | 2.47  | 5.92  |
| 5000 | 0.99 | 0.45 | 0.55 | 1002 | 2475 | 1513 | 0.03  | 0.4402 | 0.4598 | 0.5402 | 0.5598 | 969  | 2464 | 1567 | 1057 | 2484 | 1459 | 3.06  | 4.78  |
| 5000 | 1.00 | 0.45 | 0.55 | 1013 | 2475 | 1513 | 0.00  | 0.4402 | 0.4598 | 0.5402 | 0.5598 | 969  | 2464 | 1567 | 1057 | 2484 | 1459 | 3.86  | 3.83  |
| 5000 | 1.01 | 0.45 | 0.55 | 1023 | 2475 | 1513 | 0.03  | 0.4402 | 0.4598 | 0.5402 | 0.5598 | 969  | 2464 | 1567 | 1057 | 2484 | 1459 | 4.87  | 3.08  |
| 5000 | 1.02 | 0.45 | 0.55 | 1033 | 2475 | 1513 | 0.12  | 0.4402 | 0.4598 | 0.5402 | 0.5598 | 969  | 2464 | 1567 | 1057 | 2484 | 1459 | 6.10  | 2.52  |
| 5000 | 1.03 | 0.45 | 0.55 | 1043 | 2475 | 1513 | 0.27  | 0.4402 | 0.4598 | 0.5402 | 0.5598 | 969  | 2464 | 1567 | 1057 | 2484 | 1459 | 7.53  | 2.15  |
| 5000 | 1.04 | 0.45 | 0.55 | 1053 | 2475 | 1513 | 0.48  | 0.4402 | 0.4598 | 0.5402 | 0.5598 | 969  | 2464 | 1567 | 1057 | 2484 | 1459 | 9.18  | 1.98  |
| 5000 | 1.05 | 0.45 | 0.55 | 1063 | 2475 | 1513 | 0.74  | 0.4402 | 0.4598 | 0.5402 | 0.5598 | 969  | 2464 | 1567 | 1057 | 2484 | 1459 | 11.04 | 2.00  |
| 5000 | 1.06 | 0.45 | 0.55 | 1073 | 2475 | 1513 | 1.06  | 0.4402 | 0.4598 | 0.5402 | 0.5598 | 969  | 2464 | 1567 | 1057 | 2484 | 1459 | 13.11 | 2.22  |
| 5000 | 1.07 | 0.45 | 0.55 | 1083 | 2475 | 1513 | 1.43  | 0.4402 | 0.4598 | 0.5402 | 0.5598 | 969  | 2464 | 1567 | 1057 | 2484 | 1459 | 15.39 | 2.63  |
| 5000 | 1.08 | 0.45 | 0.55 | 1094 | 2475 | 1513 | 1.86  | 0.4402 | 0.4598 | 0.5402 | 0.5598 | 969  | 2464 | 1567 | 1057 | 2484 | 1459 | 17.88 | 3.24  |
| 5000 | 1.09 | 0.45 | 0.55 | 1104 | 2475 | 1513 | 2.33  | 0.4402 | 0.4598 | 0.5402 | 0.5598 | 969  | 2464 | 1567 | 1057 | 2484 | 1459 | 20.59 | 4.04  |
| 5000 | 1.10 | 0.45 | 0.55 | 1114 | 2475 | 1513 | 2.86  | 0.4402 | 0.4598 | 0.5402 | 0.5598 | 969  | 2464 | 1567 | 1057 | 2484 | 1459 | 23.51 | 5.03  |
| 5000 | 1.11 | 0.45 | 0.55 | 1124 | 2475 | 1513 | 3.44  | 0.4402 | 0.4598 | 0.5402 | 0.5598 | 969  | 2464 | 1567 | 1057 | 2484 | 1459 | 26.64 | 6.22  |
| 5000 | 1.12 | 0.45 | 0.55 | 1134 | 2475 | 1513 | 4.07  | 0.4402 | 0.4598 | 0.5402 | 0.5598 | 969  | 2464 | 1567 | 1057 | 2484 | 1459 | 29.98 | 7.60  |
| 5000 | 1.13 | 0.45 | 0.55 | 1144 | 2475 | 1513 | 4.74  | 0.4402 | 0.4598 | 0.5402 | 0.5598 | 969  | 2464 | 1567 | 1057 | 2484 | 1459 | 33.53 | 9.17  |
| 5000 | 1.14 | 0.45 | 0.55 | 1154 | 2475 | 1513 | 5.46  | 0.4402 | 0.4598 | 0.5402 | 0.5598 | 969  | 2464 | 1567 | 1057 | 2484 | 1459 | 37.29 | 10.94 |
| 5000 | 1.15 | 0.45 | 0.55 | 1164 | 2475 | 1513 | 6.23  | 0.4402 | 0.4598 | 0.5402 | 0.5598 | 969  | 2464 | 1567 | 1057 | 2484 | 1459 | 41.26 | 12.91 |
| 5000 | 1.16 | 0.45 | 0.55 | 1175 | 2475 | 1513 | 7.04  | 0.4402 | 0.4598 | 0.5402 | 0.5598 | 969  | 2464 | 1567 | 1057 | 2484 | 1459 | 45.45 | 15.06 |
| 5000 | 1.17 | 0.45 | 0.55 | 1185 | 2475 | 1513 | 7.90  | 0.4402 | 0.4598 | 0.5402 | 0.5598 | 969  | 2464 | 1567 | 1057 | 2484 | 1459 | 49.85 | 17.41 |
| 5000 | 1.18 | 0.45 | 0.55 | 1195 | 2475 | 1513 | 8.80  | 0.4402 | 0.4598 | 0.5402 | 0.5598 | 969  | 2464 | 1567 | 1057 | 2484 | 1459 | 54.46 | 19.96 |
| 5000 | 1.19 | 0.45 | 0.55 | 1205 | 2475 | 1513 | 9.74  | 0.4402 | 0.4598 | 0.5402 | 0.5598 | 969  | 2464 | 1567 | 1057 | 2484 | 1459 | 59.28 | 22.70 |
| 5000 | 1.20 | 0.45 | 0.55 | 1215 | 2475 | 1513 | 10.73 | 0.4402 | 0.4598 | 0.5402 | 0.5598 | 969  | 2464 | 1567 | 1057 | 2484 | 1459 | 64.31 | 25.63 |
| 5000 | 0.80 | 0.5  | 0.5  | 1000 | 2500 | 1250 | 14.66 | 0.4902 | 0.5098 | 0.4902 | 0.5098 | 1201 | 2499 | 1299 | 1299 | 2499 | 1201 | 35.67 | 70.98 |
| 5000 | 0.81 | 0.5  | 0.5  | 1013 | 2500 | 1250 | 13.12 | 0.4902 | 0.5098 | 0.4902 | 0.5098 | 1201 | 2499 | 1299 | 1299 | 2499 | 1201 | 31.61 | 65.34 |
| 5000 | 0.82 | 0.5  | 0.5  | 1025 | 2500 | 1250 | 11.68 | 0.4902 | 0.5098 | 0.4902 | 0.5098 | 1201 | 2499 | 1299 | 1299 | 2499 | 1201 | 27.81 | 59.94 |
| 5000 | 0.83 | 0.5  | 0.5  | 1038 | 2500 | 1250 | 10.33 | 0.4902 | 0.5098 | 0.4902 | 0.5098 | 1201 | 2499 | 1299 | 1299 | 2499 | 1201 | 24.26 | 54.78 |
| 5000 | 0.84 | 0.5  | 0.5  | 1050 | 2500 | 1250 | 9.07  | 0.4902 | 0.5098 | 0.4902 | 0.5098 | 1201 | 2499 | 1299 | 1299 | 2499 | 1201 | 20.98 | 49.86 |
| 5000 | 0.85 | 0.5  | 0.5  | 1063 | 2500 | 1250 | 7.91  | 0.4902 | 0.5098 | 0.4902 | 0.5098 | 1201 | 2499 | 1299 | 1299 | 2499 | 1201 | 17.96 | 45.18 |
| 5000 | 0.86 | 0.5  | 0.5  | 1075 | 2500 | 1250 | 6.83  | 0.4902 | 0.5098 | 0.4902 | 0.5098 | 1201 | 2499 | 1299 | 1299 | 2499 | 1201 | 15.20 | 40.74 |
| 5000 | 0.87 | 0.5  | 0.5  | 1088 | 2500 | 1250 | 5.84  | 0.4902 | 0.5098 | 0.4902 | 0.5098 | 1201 | 2499 | 1299 | 1299 | 2499 | 1201 | 12.70 | 36.54 |

|      |      |      |      |      |      |      |       |        |        |        |        |      |      |      |      |      |      |       |       |
|------|------|------|------|------|------|------|-------|--------|--------|--------|--------|------|------|------|------|------|------|-------|-------|
| 5000 | 0.88 | 0.5  | 0.5  | 1100 | 2500 | 1250 | 4.94  | 0.4902 | 0.5098 | 0.4902 | 0.5098 | 1201 | 2499 | 1299 | 1299 | 2499 | 1201 | 10.46 | 32.58 |
| 5000 | 0.89 | 0.5  | 0.5  | 1113 | 2500 | 1250 | 4.12  | 0.4902 | 0.5098 | 0.4902 | 0.5098 | 1201 | 2499 | 1299 | 1299 | 2499 | 1201 | 8.47  | 28.86 |
| 5000 | 0.90 | 0.5  | 0.5  | 1125 | 2500 | 1250 | 3.38  | 0.4902 | 0.5098 | 0.4902 | 0.5098 | 1201 | 2499 | 1299 | 1299 | 2499 | 1201 | 6.75  | 25.39 |
| 5000 | 0.91 | 0.5  | 0.5  | 1138 | 2500 | 1250 | 2.71  | 0.4902 | 0.5098 | 0.4902 | 0.5098 | 1201 | 2499 | 1299 | 1299 | 2499 | 1201 | 5.29  | 22.15 |
| 5000 | 0.92 | 0.5  | 0.5  | 1150 | 2500 | 1250 | 2.13  | 0.4902 | 0.5098 | 0.4902 | 0.5098 | 1201 | 2499 | 1299 | 1299 | 2499 | 1201 | 4.09  | 19.15 |
| 5000 | 0.93 | 0.5  | 0.5  | 1163 | 2500 | 1250 | 1.62  | 0.4902 | 0.5098 | 0.4902 | 0.5098 | 1201 | 2499 | 1299 | 1299 | 2499 | 1201 | 3.15  | 16.40 |
| 5000 | 0.94 | 0.5  | 0.5  | 1175 | 2500 | 1250 | 1.18  | 0.4902 | 0.5098 | 0.4902 | 0.5098 | 1201 | 2499 | 1299 | 1299 | 2499 | 1201 | 2.47  | 13.88 |
| 5000 | 0.95 | 0.5  | 0.5  | 1188 | 2500 | 1250 | 0.81  | 0.4902 | 0.5098 | 0.4902 | 0.5098 | 1201 | 2499 | 1299 | 1299 | 2499 | 1201 | 2.05  | 11.61 |
| 5000 | 0.96 | 0.5  | 0.5  | 1200 | 2500 | 1250 | 0.52  | 0.4902 | 0.5098 | 0.4902 | 0.5098 | 1201 | 2499 | 1299 | 1299 | 2499 | 1201 | 1.89  | 9.58  |
| 5000 | 0.97 | 0.5  | 0.5  | 1213 | 2500 | 1250 | 0.29  | 0.4902 | 0.5098 | 0.4902 | 0.5098 | 1201 | 2499 | 1299 | 1299 | 2499 | 1201 | 1.99  | 7.78  |
| 5000 | 0.98 | 0.5  | 0.5  | 1225 | 2500 | 1250 | 0.13  | 0.4902 | 0.5098 | 0.4902 | 0.5098 | 1201 | 2499 | 1299 | 1299 | 2499 | 1201 | 2.34  | 6.23  |
| 5000 | 0.99 | 0.5  | 0.5  | 1238 | 2500 | 1250 | 0.03  | 0.4902 | 0.5098 | 0.4902 | 0.5098 | 1201 | 2499 | 1299 | 1299 | 2499 | 1201 | 2.96  | 4.92  |
| 5000 | 1.00 | 0.5  | 0.5  | 1250 | 2500 | 1250 | 0.00  | 0.4902 | 0.5098 | 0.4902 | 0.5098 | 1201 | 2499 | 1299 | 1299 | 2499 | 1201 | 3.84  | 3.84  |
| 5000 | 1.01 | 0.5  | 0.5  | 1263 | 2500 | 1250 | 0.03  | 0.4902 | 0.5098 | 0.4902 | 0.5098 | 1201 | 2499 | 1299 | 1299 | 2499 | 1201 | 4.98  | 3.01  |
| 5000 | 1.02 | 0.5  | 0.5  | 1275 | 2500 | 1250 | 0.12  | 0.4902 | 0.5098 | 0.4902 | 0.5098 | 1201 | 2499 | 1299 | 1299 | 2499 | 1201 | 6.38  | 2.42  |
| 5000 | 1.03 | 0.5  | 0.5  | 1288 | 2500 | 1250 | 0.28  | 0.4902 | 0.5098 | 0.4902 | 0.5098 | 1201 | 2499 | 1299 | 1299 | 2499 | 1201 | 8.04  | 2.07  |
| 5000 | 1.04 | 0.5  | 0.5  | 1300 | 2500 | 1250 | 0.49  | 0.4902 | 0.5098 | 0.4902 | 0.5098 | 1201 | 2499 | 1299 | 1299 | 2499 | 1201 | 9.96  | 1.96  |
| 5000 | 1.05 | 0.5  | 0.5  | 1313 | 2500 | 1250 | 0.75  | 0.4902 | 0.5098 | 0.4902 | 0.5098 | 1201 | 2499 | 1299 | 1299 | 2499 | 1201 | 12.14 | 2.09  |
| 5000 | 1.06 | 0.5  | 0.5  | 1325 | 2500 | 1250 | 1.08  | 0.4902 | 0.5098 | 0.4902 | 0.5098 | 1201 | 2499 | 1299 | 1299 | 2499 | 1201 | 14.58 | 2.46  |
| 5000 | 1.07 | 0.5  | 0.5  | 1338 | 2500 | 1250 | 1.45  | 0.4902 | 0.5098 | 0.4902 | 0.5098 | 1201 | 2499 | 1299 | 1299 | 2499 | 1201 | 17.28 | 3.07  |
| 5000 | 1.08 | 0.5  | 0.5  | 1350 | 2500 | 1250 | 1.89  | 0.4902 | 0.5098 | 0.4902 | 0.5098 | 1201 | 2499 | 1299 | 1299 | 2499 | 1201 | 20.24 | 3.92  |
| 5000 | 1.09 | 0.5  | 0.5  | 1363 | 2500 | 1250 | 2.37  | 0.4902 | 0.5098 | 0.4902 | 0.5098 | 1201 | 2499 | 1299 | 1299 | 2499 | 1201 | 23.46 | 5.02  |
| 5000 | 1.10 | 0.5  | 0.5  | 1375 | 2500 | 1250 | 2.91  | 0.4902 | 0.5098 | 0.4902 | 0.5098 | 1201 | 2499 | 1299 | 1299 | 2499 | 1201 | 26.94 | 6.35  |
| 5000 | 1.11 | 0.5  | 0.5  | 1388 | 2500 | 1250 | 3.49  | 0.4902 | 0.5098 | 0.4902 | 0.5098 | 1201 | 2499 | 1299 | 1299 | 2499 | 1201 | 30.69 | 7.92  |
| 5000 | 1.12 | 0.5  | 0.5  | 1400 | 2500 | 1250 | 4.13  | 0.4902 | 0.5098 | 0.4902 | 0.5098 | 1201 | 2499 | 1299 | 1299 | 2499 | 1201 | 34.69 | 9.74  |
| 5000 | 1.13 | 0.5  | 0.5  | 1413 | 2500 | 1250 | 4.81  | 0.4902 | 0.5098 | 0.4902 | 0.5098 | 1201 | 2499 | 1299 | 1299 | 2499 | 1201 | 38.95 | 11.79 |
| 5000 | 1.14 | 0.5  | 0.5  | 1425 | 2500 | 1250 | 5.54  | 0.4902 | 0.5098 | 0.4902 | 0.5098 | 1201 | 2499 | 1299 | 1299 | 2499 | 1201 | 43.47 | 14.08 |
| 5000 | 1.15 | 0.5  | 0.5  | 1438 | 2500 | 1250 | 6.31  | 0.4902 | 0.5098 | 0.4902 | 0.5098 | 1201 | 2499 | 1299 | 1299 | 2499 | 1201 | 48.25 | 16.62 |
| 5000 | 1.16 | 0.5  | 0.5  | 1450 | 2500 | 1250 | 7.13  | 0.4902 | 0.5098 | 0.4902 | 0.5098 | 1201 | 2499 | 1299 | 1299 | 2499 | 1201 | 53.29 | 19.39 |
| 5000 | 1.17 | 0.5  | 0.5  | 1463 | 2500 | 1250 | 8.00  | 0.4902 | 0.5098 | 0.4902 | 0.5098 | 1201 | 2499 | 1299 | 1299 | 2499 | 1201 | 58.59 | 22.41 |
| 5000 | 1.18 | 0.5  | 0.5  | 1475 | 2500 | 1250 | 8.91  | 0.4902 | 0.5098 | 0.4902 | 0.5098 | 1201 | 2499 | 1299 | 1299 | 2499 | 1201 | 64.15 | 25.67 |
| 5000 | 1.19 | 0.5  | 0.5  | 1488 | 2500 | 1250 | 9.86  | 0.4902 | 0.5098 | 0.4902 | 0.5098 | 1201 | 2499 | 1299 | 1299 | 2499 | 1201 | 69.97 | 29.16 |
| 5000 | 1.20 | 0.5  | 0.5  | 1500 | 2500 | 1250 | 10.85 | 0.4902 | 0.5098 | 0.4902 | 0.5098 | 1201 | 2499 | 1299 | 1299 | 2499 | 1201 | 76.05 | 32.90 |
| 5000 | 0.80 | 0.55 | 0.45 | 1210 | 2475 | 1013 | 14.53 | 0.5402 | 0.5598 | 0.4402 | 0.4598 | 1459 | 2484 | 1057 | 1567 | 2464 | 969  | 44.50 | 83.16 |
| 5000 | 0.81 | 0.55 | 0.45 | 1225 | 2475 | 1013 | 13.00 | 0.5402 | 0.5598 | 0.4402 | 0.4598 | 1459 | 2484 | 1057 | 1567 | 2464 | 969  | 39.48 | 76.42 |

|      |      |      |      |      |      |      |       |        |        |        |        |      |      |      |      |      |     |       |       |
|------|------|------|------|------|------|------|-------|--------|--------|--------|--------|------|------|------|------|------|-----|-------|-------|
| 5000 | 0.82 | 0.55 | 0.45 | 1240 | 2475 | 1013 | 11.56 | 0.5402 | 0.5598 | 0.4402 | 0.4598 | 1459 | 2484 | 1057 | 1567 | 2464 | 969 | 34.79 | 69.98 |
| 5000 | 0.83 | 0.55 | 0.45 | 1255 | 2475 | 1013 | 10.22 | 0.5402 | 0.5598 | 0.4402 | 0.4598 | 1459 | 2484 | 1057 | 1567 | 2464 | 969 | 30.40 | 63.82 |
| 5000 | 0.84 | 0.55 | 0.45 | 1271 | 2475 | 1013 | 8.97  | 0.5402 | 0.5598 | 0.4402 | 0.4598 | 1459 | 2484 | 1057 | 1567 | 2464 | 969 | 26.33 | 57.96 |
| 5000 | 0.85 | 0.55 | 0.45 | 1286 | 2475 | 1013 | 7.81  | 0.5402 | 0.5598 | 0.4402 | 0.4598 | 1459 | 2484 | 1057 | 1567 | 2464 | 969 | 22.57 | 52.39 |
| 5000 | 0.86 | 0.55 | 0.45 | 1301 | 2475 | 1013 | 6.75  | 0.5402 | 0.5598 | 0.4402 | 0.4598 | 1459 | 2484 | 1057 | 1567 | 2464 | 969 | 19.13 | 47.11 |
| 5000 | 0.87 | 0.55 | 0.45 | 1316 | 2475 | 1013 | 5.77  | 0.5402 | 0.5598 | 0.4402 | 0.4598 | 1459 | 2484 | 1057 | 1567 | 2464 | 969 | 16.00 | 42.12 |
| 5000 | 0.88 | 0.55 | 0.45 | 1331 | 2475 | 1013 | 4.87  | 0.5402 | 0.5598 | 0.4402 | 0.4598 | 1459 | 2484 | 1057 | 1567 | 2464 | 969 | 13.18 | 37.42 |
| 5000 | 0.89 | 0.55 | 0.45 | 1346 | 2475 | 1013 | 4.06  | 0.5402 | 0.5598 | 0.4402 | 0.4598 | 1459 | 2484 | 1057 | 1567 | 2464 | 969 | 10.68 | 33.02 |
| 5000 | 0.90 | 0.55 | 0.45 | 1361 | 2475 | 1013 | 3.33  | 0.5402 | 0.5598 | 0.4402 | 0.4598 | 1459 | 2484 | 1057 | 1567 | 2464 | 969 | 8.49  | 28.91 |
| 5000 | 0.91 | 0.55 | 0.45 | 1376 | 2475 | 1013 | 2.67  | 0.5402 | 0.5598 | 0.4402 | 0.4598 | 1459 | 2484 | 1057 | 1567 | 2464 | 969 | 6.61  | 25.09 |
| 5000 | 0.92 | 0.55 | 0.45 | 1392 | 2475 | 1013 | 2.09  | 0.5402 | 0.5598 | 0.4402 | 0.4598 | 1459 | 2484 | 1057 | 1567 | 2464 | 969 | 5.05  | 21.56 |
| 5000 | 0.93 | 0.55 | 0.45 | 1407 | 2475 | 1013 | 1.59  | 0.5402 | 0.5598 | 0.4402 | 0.4598 | 1459 | 2484 | 1057 | 1567 | 2464 | 969 | 3.80  | 18.33 |
| 5000 | 0.94 | 0.55 | 0.45 | 1422 | 2475 | 1013 | 1.16  | 0.5402 | 0.5598 | 0.4402 | 0.4598 | 1459 | 2484 | 1057 | 1567 | 2464 | 969 | 2.86  | 15.38 |
| 5000 | 0.95 | 0.55 | 0.45 | 1437 | 2475 | 1013 | 0.80  | 0.5402 | 0.5598 | 0.4402 | 0.4598 | 1459 | 2484 | 1057 | 1567 | 2464 | 969 | 2.24  | 12.73 |
| 5000 | 0.96 | 0.55 | 0.45 | 1452 | 2475 | 1013 | 0.51  | 0.5402 | 0.5598 | 0.4402 | 0.4598 | 1459 | 2484 | 1057 | 1567 | 2464 | 969 | 1.93  | 10.37 |
| 5000 | 0.97 | 0.55 | 0.45 | 1467 | 2475 | 1013 | 0.28  | 0.5402 | 0.5598 | 0.4402 | 0.4598 | 1459 | 2484 | 1057 | 1567 | 2464 | 969 | 1.93  | 8.31  |
| 5000 | 0.98 | 0.55 | 0.45 | 1482 | 2475 | 1013 | 0.12  | 0.5402 | 0.5598 | 0.4402 | 0.4598 | 1459 | 2484 | 1057 | 1567 | 2464 | 969 | 2.25  | 6.53  |
| 5000 | 0.99 | 0.55 | 0.45 | 1497 | 2475 | 1013 | 0.03  | 0.5402 | 0.5598 | 0.4402 | 0.4598 | 1459 | 2484 | 1057 | 1567 | 2464 | 969 | 2.88  | 5.05  |
| 5000 | 1.00 | 0.55 | 0.45 | 1513 | 2475 | 1013 | 0.00  | 0.5402 | 0.5598 | 0.4402 | 0.4598 | 1459 | 2484 | 1057 | 1567 | 2464 | 969 | 3.83  | 3.86  |
| 5000 | 1.01 | 0.55 | 0.45 | 1528 | 2475 | 1013 | 0.03  | 0.5402 | 0.5598 | 0.4402 | 0.4598 | 1459 | 2484 | 1057 | 1567 | 2464 | 969 | 5.09  | 2.96  |
| 5000 | 1.02 | 0.55 | 0.45 | 1543 | 2475 | 1013 | 0.12  | 0.5402 | 0.5598 | 0.4402 | 0.4598 | 1459 | 2484 | 1057 | 1567 | 2464 | 969 | 6.66  | 2.35  |
| 5000 | 1.03 | 0.55 | 0.45 | 1558 | 2475 | 1013 | 0.27  | 0.5402 | 0.5598 | 0.4402 | 0.4598 | 1459 | 2484 | 1057 | 1567 | 2464 | 969 | 8.54  | 2.04  |
| 5000 | 1.04 | 0.55 | 0.45 | 1573 | 2475 | 1013 | 0.47  | 0.5402 | 0.5598 | 0.4402 | 0.4598 | 1459 | 2484 | 1057 | 1567 | 2464 | 969 | 10.74 | 2.02  |
| 5000 | 1.05 | 0.55 | 0.45 | 1588 | 2475 | 1013 | 0.74  | 0.5402 | 0.5598 | 0.4402 | 0.4598 | 1459 | 2484 | 1057 | 1567 | 2464 | 969 | 13.26 | 2.29  |
| 5000 | 1.06 | 0.55 | 0.45 | 1603 | 2475 | 1013 | 1.05  | 0.5402 | 0.5598 | 0.4402 | 0.4598 | 1459 | 2484 | 1057 | 1567 | 2464 | 969 | 16.08 | 2.85  |
| 5000 | 1.07 | 0.55 | 0.45 | 1618 | 2475 | 1013 | 1.42  | 0.5402 | 0.5598 | 0.4402 | 0.4598 | 1459 | 2484 | 1057 | 1567 | 2464 | 969 | 19.22 | 3.70  |
| 5000 | 1.08 | 0.55 | 0.45 | 1634 | 2475 | 1013 | 1.84  | 0.5402 | 0.5598 | 0.4402 | 0.4598 | 1459 | 2484 | 1057 | 1567 | 2464 | 969 | 22.68 | 4.85  |
| 5000 | 1.09 | 0.55 | 0.45 | 1649 | 2475 | 1013 | 2.31  | 0.5402 | 0.5598 | 0.4402 | 0.4598 | 1459 | 2484 | 1057 | 1567 | 2464 | 969 | 26.44 | 6.28  |
| 5000 | 1.10 | 0.55 | 0.45 | 1664 | 2475 | 1013 | 2.84  | 0.5402 | 0.5598 | 0.4402 | 0.4598 | 1459 | 2484 | 1057 | 1567 | 2464 | 969 | 30.52 | 8.01  |
| 5000 | 1.11 | 0.55 | 0.45 | 1679 | 2475 | 1013 | 3.40  | 0.5402 | 0.5598 | 0.4402 | 0.4598 | 1459 | 2484 | 1057 | 1567 | 2464 | 969 | 34.92 | 10.04 |
| 5000 | 1.12 | 0.55 | 0.45 | 1694 | 2475 | 1013 | 4.02  | 0.5402 | 0.5598 | 0.4402 | 0.4598 | 1459 | 2484 | 1057 | 1567 | 2464 | 969 | 39.62 | 12.35 |
| 5000 | 1.13 | 0.55 | 0.45 | 1709 | 2475 | 1013 | 4.69  | 0.5402 | 0.5598 | 0.4402 | 0.4598 | 1459 | 2484 | 1057 | 1567 | 2464 | 969 | 44.64 | 14.96 |
| 5000 | 1.14 | 0.55 | 0.45 | 1724 | 2475 | 1013 | 5.39  | 0.5402 | 0.5598 | 0.4402 | 0.4598 | 1459 | 2484 | 1057 | 1567 | 2464 | 969 | 49.98 | 17.85 |
| 5000 | 1.15 | 0.55 | 0.45 | 1739 | 2475 | 1013 | 6.15  | 0.5402 | 0.5598 | 0.4402 | 0.4598 | 1459 | 2484 | 1057 | 1567 | 2464 | 969 | 55.63 | 21.04 |
| 5000 | 1.16 | 0.55 | 0.45 | 1755 | 2475 | 1013 | 6.94  | 0.5402 | 0.5598 | 0.4402 | 0.4598 | 1459 | 2484 | 1057 | 1567 | 2464 | 969 | 61.59 | 24.53 |

|      |      |      |      |      |      |      |       |        |        |        |        |      |      |      |      |      |     |       |       |
|------|------|------|------|------|------|------|-------|--------|--------|--------|--------|------|------|------|------|------|-----|-------|-------|
| 5000 | 1.17 | 0.55 | 0.45 | 1770 | 2475 | 1013 | 7.78  | 0.5402 | 0.5598 | 0.4402 | 0.4598 | 1459 | 2484 | 1057 | 1567 | 2464 | 969 | 67.86 | 28.30 |
| 5000 | 1.18 | 0.55 | 0.45 | 1785 | 2475 | 1013 | 8.66  | 0.5402 | 0.5598 | 0.4402 | 0.4598 | 1459 | 2484 | 1057 | 1567 | 2464 | 969 | 74.45 | 32.37 |
| 5000 | 1.19 | 0.55 | 0.45 | 1800 | 2475 | 1013 | 9.58  | 0.5402 | 0.5598 | 0.4402 | 0.4598 | 1459 | 2484 | 1057 | 1567 | 2464 | 969 | 81.35 | 36.72 |
| 5000 | 1.20 | 0.55 | 0.45 | 1815 | 2475 | 1013 | 10.54 | 0.5402 | 0.5598 | 0.4402 | 0.4598 | 1459 | 2484 | 1057 | 1567 | 2464 | 969 | 88.57 | 41.37 |
| 5000 | 0.80 | 0.6  | 0.4  | 1440 | 2400 | 800  | 13.80 | 0.5904 | 0.6096 | 0.3904 | 0.4096 | 1743 | 2418 | 839  | 1858 | 2380 | 762 | 54.56 | 96.13 |
| 5000 | 0.81 | 0.6  | 0.4  | 1458 | 2400 | 800  | 12.34 | 0.5904 | 0.6096 | 0.3904 | 0.4096 | 1743 | 2418 | 839  | 1858 | 2380 | 762 | 48.49 | 88.20 |
| 5000 | 0.82 | 0.6  | 0.4  | 1476 | 2400 | 800  | 10.97 | 0.5904 | 0.6096 | 0.3904 | 0.4096 | 1743 | 2418 | 839  | 1858 | 2380 | 762 | 42.80 | 80.62 |
| 5000 | 0.83 | 0.6  | 0.4  | 1494 | 2400 | 800  | 9.69  | 0.5904 | 0.6096 | 0.3904 | 0.4096 | 1743 | 2418 | 839  | 1858 | 2380 | 762 | 37.47 | 73.40 |
| 5000 | 0.84 | 0.6  | 0.4  | 1512 | 2400 | 800  | 8.50  | 0.5904 | 0.6096 | 0.3904 | 0.4096 | 1743 | 2418 | 839  | 1858 | 2380 | 762 | 32.52 | 66.52 |
| 5000 | 0.85 | 0.6  | 0.4  | 1530 | 2400 | 800  | 7.40  | 0.5904 | 0.6096 | 0.3904 | 0.4096 | 1743 | 2418 | 839  | 1858 | 2380 | 762 | 27.93 | 59.99 |
| 5000 | 0.86 | 0.6  | 0.4  | 1548 | 2400 | 800  | 6.39  | 0.5904 | 0.6096 | 0.3904 | 0.4096 | 1743 | 2418 | 839  | 1858 | 2380 | 762 | 23.72 | 53.80 |
| 5000 | 0.87 | 0.6  | 0.4  | 1566 | 2400 | 800  | 5.46  | 0.5904 | 0.6096 | 0.3904 | 0.4096 | 1743 | 2418 | 839  | 1858 | 2380 | 762 | 19.88 | 47.97 |
| 5000 | 0.88 | 0.6  | 0.4  | 1584 | 2400 | 800  | 4.61  | 0.5904 | 0.6096 | 0.3904 | 0.4096 | 1743 | 2418 | 839  | 1858 | 2380 | 762 | 16.42 | 42.49 |
| 5000 | 0.89 | 0.6  | 0.4  | 1602 | 2400 | 800  | 3.84  | 0.5904 | 0.6096 | 0.3904 | 0.4096 | 1743 | 2418 | 839  | 1858 | 2380 | 762 | 13.32 | 37.35 |
| 5000 | 0.90 | 0.6  | 0.4  | 1620 | 2400 | 800  | 3.14  | 0.5904 | 0.6096 | 0.3904 | 0.4096 | 1743 | 2418 | 839  | 1858 | 2380 | 762 | 10.60 | 32.56 |
| 5000 | 0.91 | 0.6  | 0.4  | 1638 | 2400 | 800  | 2.52  | 0.5904 | 0.6096 | 0.3904 | 0.4096 | 1743 | 2418 | 839  | 1858 | 2380 | 762 | 8.25  | 28.13 |
| 5000 | 0.92 | 0.6  | 0.4  | 1656 | 2400 | 800  | 1.98  | 0.5904 | 0.6096 | 0.3904 | 0.4096 | 1743 | 2418 | 839  | 1858 | 2380 | 762 | 6.27  | 24.04 |
| 5000 | 0.93 | 0.6  | 0.4  | 1674 | 2400 | 800  | 1.50  | 0.5904 | 0.6096 | 0.3904 | 0.4096 | 1743 | 2418 | 839  | 1858 | 2380 | 762 | 4.66  | 20.30 |
| 5000 | 0.94 | 0.6  | 0.4  | 1692 | 2400 | 800  | 1.09  | 0.5904 | 0.6096 | 0.3904 | 0.4096 | 1743 | 2418 | 839  | 1858 | 2380 | 762 | 3.42  | 16.90 |
| 5000 | 0.95 | 0.6  | 0.4  | 1710 | 2400 | 800  | 0.75  | 0.5904 | 0.6096 | 0.3904 | 0.4096 | 1743 | 2418 | 839  | 1858 | 2380 | 762 | 2.56  | 13.86 |
| 5000 | 0.96 | 0.6  | 0.4  | 1728 | 2400 | 800  | 0.48  | 0.5904 | 0.6096 | 0.3904 | 0.4096 | 1743 | 2418 | 839  | 1858 | 2380 | 762 | 2.07  | 11.17 |
| 5000 | 0.97 | 0.6  | 0.4  | 1746 | 2400 | 800  | 0.27  | 0.5904 | 0.6096 | 0.3904 | 0.4096 | 1743 | 2418 | 839  | 1858 | 2380 | 762 | 1.94  | 8.82  |
| 5000 | 0.98 | 0.6  | 0.4  | 1764 | 2400 | 800  | 0.12  | 0.5904 | 0.6096 | 0.3904 | 0.4096 | 1743 | 2418 | 839  | 1858 | 2380 | 762 | 2.20  | 6.82  |
| 5000 | 0.99 | 0.6  | 0.4  | 1782 | 2400 | 800  | 0.03  | 0.5904 | 0.6096 | 0.3904 | 0.4096 | 1743 | 2418 | 839  | 1858 | 2380 | 762 | 2.82  | 5.17  |
| 5000 | 1.00 | 0.6  | 0.4  | 1800 | 2400 | 800  | 0.00  | 0.5904 | 0.6096 | 0.3904 | 0.4096 | 1743 | 2418 | 839  | 1858 | 2380 | 762 | 3.81  | 3.87  |
| 5000 | 1.01 | 0.6  | 0.4  | 1818 | 2400 | 800  | 0.03  | 0.5904 | 0.6096 | 0.3904 | 0.4096 | 1743 | 2418 | 839  | 1858 | 2380 | 762 | 5.18  | 2.92  |
| 5000 | 1.02 | 0.6  | 0.4  | 1836 | 2400 | 800  | 0.11  | 0.5904 | 0.6096 | 0.3904 | 0.4096 | 1743 | 2418 | 839  | 1858 | 2380 | 762 | 6.92  | 2.32  |
| 5000 | 1.03 | 0.6  | 0.4  | 1854 | 2400 | 800  | 0.25  | 0.5904 | 0.6096 | 0.3904 | 0.4096 | 1743 | 2418 | 839  | 1858 | 2380 | 762 | 9.03  | 2.07  |
| 5000 | 1.04 | 0.6  | 0.4  | 1872 | 2400 | 800  | 0.45  | 0.5904 | 0.6096 | 0.3904 | 0.4096 | 1743 | 2418 | 839  | 1858 | 2380 | 762 | 11.51 | 2.16  |
| 5000 | 1.05 | 0.6  | 0.4  | 1890 | 2400 | 800  | 0.69  | 0.5904 | 0.6096 | 0.3904 | 0.4096 | 1743 | 2418 | 839  | 1858 | 2380 | 762 | 14.36 | 2.61  |
| 5000 | 1.06 | 0.6  | 0.4  | 1908 | 2400 | 800  | 0.99  | 0.5904 | 0.6096 | 0.3904 | 0.4096 | 1743 | 2418 | 839  | 1858 | 2380 | 762 | 17.59 | 3.40  |
| 5000 | 1.07 | 0.6  | 0.4  | 1926 | 2400 | 800  | 1.33  | 0.5904 | 0.6096 | 0.3904 | 0.4096 | 1743 | 2418 | 839  | 1858 | 2380 | 762 | 21.19 | 4.54  |
| 5000 | 1.08 | 0.6  | 0.4  | 1944 | 2400 | 800  | 1.73  | 0.5904 | 0.6096 | 0.3904 | 0.4096 | 1743 | 2418 | 839  | 1858 | 2380 | 762 | 25.16 | 6.03  |
| 5000 | 1.09 | 0.6  | 0.4  | 1962 | 2400 | 800  | 2.17  | 0.5904 | 0.6096 | 0.3904 | 0.4096 | 1743 | 2418 | 839  | 1858 | 2380 | 762 | 29.50 | 7.87  |
| 5000 | 1.10 | 0.6  | 0.4  | 1980 | 2400 | 800  | 2.66  | 0.5904 | 0.6096 | 0.3904 | 0.4096 | 1743 | 2418 | 839  | 1858 | 2380 | 762 | 34.21 | 10.06 |

|      |      |      |      |      |      |     |       |        |        |        |        |      |      |     |      |      |     |        |        |
|------|------|------|------|------|------|-----|-------|--------|--------|--------|--------|------|------|-----|------|------|-----|--------|--------|
| 5000 | 1.11 | 0.6  | 0.4  | 1998 | 2400 | 800 | 3.19  | 0.5904 | 0.6096 | 0.3904 | 0.4096 | 1743 | 2418 | 839 | 1858 | 2380 | 762 | 39.29  | 12.60  |
| 5000 | 1.12 | 0.6  | 0.4  | 2016 | 2400 | 800 | 3.76  | 0.5904 | 0.6096 | 0.3904 | 0.4096 | 1743 | 2418 | 839 | 1858 | 2380 | 762 | 44.75  | 15.48  |
| 5000 | 1.13 | 0.6  | 0.4  | 2034 | 2400 | 800 | 4.38  | 0.5904 | 0.6096 | 0.3904 | 0.4096 | 1743 | 2418 | 839 | 1858 | 2380 | 762 | 50.58  | 18.72  |
| 5000 | 1.14 | 0.6  | 0.4  | 2052 | 2400 | 800 | 5.05  | 0.5904 | 0.6096 | 0.3904 | 0.4096 | 1743 | 2418 | 839 | 1858 | 2380 | 762 | 56.78  | 22.30  |
| 5000 | 1.15 | 0.6  | 0.4  | 2070 | 2400 | 800 | 5.75  | 0.5904 | 0.6096 | 0.3904 | 0.4096 | 1743 | 2418 | 839 | 1858 | 2380 | 762 | 63.35  | 26.23  |
| 5000 | 1.16 | 0.6  | 0.4  | 2088 | 2400 | 800 | 6.49  | 0.5904 | 0.6096 | 0.3904 | 0.4096 | 1743 | 2418 | 839 | 1858 | 2380 | 762 | 70.29  | 30.51  |
| 5000 | 1.17 | 0.6  | 0.4  | 2106 | 2400 | 800 | 7.27  | 0.5904 | 0.6096 | 0.3904 | 0.4096 | 1743 | 2418 | 839 | 1858 | 2380 | 762 | 77.61  | 35.14  |
| 5000 | 1.18 | 0.6  | 0.4  | 2124 | 2400 | 800 | 8.09  | 0.5904 | 0.6096 | 0.3904 | 0.4096 | 1743 | 2418 | 839 | 1858 | 2380 | 762 | 85.29  | 40.12  |
| 5000 | 1.19 | 0.6  | 0.4  | 2142 | 2400 | 800 | 8.95  | 0.5904 | 0.6096 | 0.3904 | 0.4096 | 1743 | 2418 | 839 | 1858 | 2380 | 762 | 93.35  | 45.45  |
| 5000 | 1.20 | 0.6  | 0.4  | 2160 | 2400 | 800 | 9.84  | 0.5904 | 0.6096 | 0.3904 | 0.4096 | 1743 | 2418 | 839 | 1858 | 2380 | 762 | 101.78 | 51.12  |
| 5000 | 0.80 | 0.65 | 0.35 | 1690 | 2275 | 613 | 12.52 | 0.6407 | 0.6593 | 0.3407 | 0.3593 | 2052 | 2302 | 646 | 2174 | 2246 | 580 | 65.94  | 109.80 |
| 5000 | 0.81 | 0.65 | 0.35 | 1711 | 2275 | 613 | 11.18 | 0.6407 | 0.6593 | 0.3407 | 0.3593 | 2052 | 2302 | 646 | 2174 | 2246 | 580 | 58.70  | 100.61 |
| 5000 | 0.82 | 0.65 | 0.35 | 1732 | 2275 | 613 | 9.94  | 0.6407 | 0.6593 | 0.3407 | 0.3593 | 2052 | 2302 | 646 | 2174 | 2246 | 580 | 51.90  | 91.82  |
| 5000 | 0.83 | 0.65 | 0.35 | 1753 | 2275 | 613 | 8.77  | 0.6407 | 0.6593 | 0.3407 | 0.3593 | 2052 | 2302 | 646 | 2174 | 2246 | 580 | 45.53  | 83.45  |
| 5000 | 0.84 | 0.65 | 0.35 | 1775 | 2275 | 613 | 7.69  | 0.6407 | 0.6593 | 0.3407 | 0.3593 | 2052 | 2302 | 646 | 2174 | 2246 | 580 | 39.59  | 75.48  |
| 5000 | 0.85 | 0.65 | 0.35 | 1796 | 2275 | 613 | 6.70  | 0.6407 | 0.6593 | 0.3407 | 0.3593 | 2052 | 2302 | 646 | 2174 | 2246 | 580 | 34.09  | 67.93  |
| 5000 | 0.86 | 0.65 | 0.35 | 1817 | 2275 | 613 | 5.78  | 0.6407 | 0.6593 | 0.3407 | 0.3593 | 2052 | 2302 | 646 | 2174 | 2246 | 580 | 29.03  | 60.79  |
| 5000 | 0.87 | 0.65 | 0.35 | 1838 | 2275 | 613 | 4.93  | 0.6407 | 0.6593 | 0.3407 | 0.3593 | 2052 | 2302 | 646 | 2174 | 2246 | 580 | 24.40  | 54.05  |
| 5000 | 0.88 | 0.65 | 0.35 | 1859 | 2275 | 613 | 4.16  | 0.6407 | 0.6593 | 0.3407 | 0.3593 | 2052 | 2302 | 646 | 2174 | 2246 | 580 | 20.21  | 47.73  |
| 5000 | 0.89 | 0.65 | 0.35 | 1880 | 2275 | 613 | 3.46  | 0.6407 | 0.6593 | 0.3407 | 0.3593 | 2052 | 2302 | 646 | 2174 | 2246 | 580 | 16.45  | 41.82  |
| 5000 | 0.90 | 0.65 | 0.35 | 1901 | 2275 | 613 | 2.84  | 0.6407 | 0.6593 | 0.3407 | 0.3593 | 2052 | 2302 | 646 | 2174 | 2246 | 580 | 13.12  | 36.32  |
| 5000 | 0.91 | 0.65 | 0.35 | 1922 | 2275 | 613 | 2.27  | 0.6407 | 0.6593 | 0.3407 | 0.3593 | 2052 | 2302 | 646 | 2174 | 2246 | 580 | 10.23  | 31.23  |
| 5000 | 0.92 | 0.65 | 0.35 | 1944 | 2275 | 613 | 1.78  | 0.6407 | 0.6593 | 0.3407 | 0.3593 | 2052 | 2302 | 646 | 2174 | 2246 | 580 | 7.78   | 26.55  |
| 5000 | 0.93 | 0.65 | 0.35 | 1965 | 2275 | 613 | 1.35  | 0.6407 | 0.6593 | 0.3407 | 0.3593 | 2052 | 2302 | 646 | 2174 | 2246 | 580 | 5.76   | 22.28  |
| 5000 | 0.94 | 0.65 | 0.35 | 1986 | 2275 | 613 | 0.98  | 0.6407 | 0.6593 | 0.3407 | 0.3593 | 2052 | 2302 | 646 | 2174 | 2246 | 580 | 4.17   | 18.42  |
| 5000 | 0.95 | 0.65 | 0.35 | 2007 | 2275 | 613 | 0.68  | 0.6407 | 0.6593 | 0.3407 | 0.3593 | 2052 | 2302 | 646 | 2174 | 2246 | 580 | 3.02   | 14.97  |
| 5000 | 0.96 | 0.65 | 0.35 | 2028 | 2275 | 613 | 0.43  | 0.6407 | 0.6593 | 0.3407 | 0.3593 | 2052 | 2302 | 646 | 2174 | 2246 | 580 | 2.31   | 11.94  |
| 5000 | 0.97 | 0.65 | 0.35 | 2049 | 2275 | 613 | 0.24  | 0.6407 | 0.6593 | 0.3407 | 0.3593 | 2052 | 2302 | 646 | 2174 | 2246 | 580 | 2.03   | 9.31   |
| 5000 | 0.98 | 0.65 | 0.35 | 2070 | 2275 | 613 | 0.11  | 0.6407 | 0.6593 | 0.3407 | 0.3593 | 2052 | 2302 | 646 | 2174 | 2246 | 580 | 2.18   | 7.09   |
| 5000 | 0.99 | 0.65 | 0.35 | 2091 | 2275 | 613 | 0.03  | 0.6407 | 0.6593 | 0.3407 | 0.3593 | 2052 | 2302 | 646 | 2174 | 2246 | 580 | 2.77   | 5.29   |
| 5000 | 1.00 | 0.65 | 0.35 | 2113 | 2275 | 613 | 0.00  | 0.6407 | 0.6593 | 0.3407 | 0.3593 | 2052 | 2302 | 646 | 2174 | 2246 | 580 | 3.80   | 3.89   |
| 5000 | 1.01 | 0.65 | 0.35 | 2134 | 2275 | 613 | 0.03  | 0.6407 | 0.6593 | 0.3407 | 0.3593 | 2052 | 2302 | 646 | 2174 | 2246 | 580 | 5.26   | 2.91   |
| 5000 | 1.02 | 0.65 | 0.35 | 2155 | 2275 | 613 | 0.10  | 0.6407 | 0.6593 | 0.3407 | 0.3593 | 2052 | 2302 | 646 | 2174 | 2246 | 580 | 7.15   | 2.33   |
| 5000 | 1.03 | 0.65 | 0.35 | 2176 | 2275 | 613 | 0.23  | 0.6407 | 0.6593 | 0.3407 | 0.3593 | 2052 | 2302 | 646 | 2174 | 2246 | 580 | 9.48   | 2.17   |
| 5000 | 1.04 | 0.65 | 0.35 | 2197 | 2275 | 613 | 0.40  | 0.6407 | 0.6593 | 0.3407 | 0.3593 | 2052 | 2302 | 646 | 2174 | 2246 | 580 | 12.24  | 2.42   |

|      |      |      |      |      |      |     |       |        |        |        |        |      |      |     |      |      |     |        |        |
|------|------|------|------|------|------|-----|-------|--------|--------|--------|--------|------|------|-----|------|------|-----|--------|--------|
| 5000 | 1.05 | 0.65 | 0.35 | 2218 | 2275 | 613 | 0.62  | 0.6407 | 0.6593 | 0.3407 | 0.3593 | 2052 | 2302 | 646 | 2174 | 2246 | 580 | 15.44  | 3.08   |
| 5000 | 1.06 | 0.65 | 0.35 | 2239 | 2275 | 613 | 0.88  | 0.6407 | 0.6593 | 0.3407 | 0.3593 | 2052 | 2302 | 646 | 2174 | 2246 | 580 | 19.08  | 4.15   |
| 5000 | 1.07 | 0.65 | 0.35 | 2260 | 2275 | 613 | 1.19  | 0.6407 | 0.6593 | 0.3407 | 0.3593 | 2052 | 2302 | 646 | 2174 | 2246 | 580 | 23.15  | 5.62   |
| 5000 | 1.08 | 0.65 | 0.35 | 2282 | 2275 | 613 | 1.55  | 0.6407 | 0.6593 | 0.3407 | 0.3593 | 2052 | 2302 | 646 | 2174 | 2246 | 580 | 27.65  | 7.51   |
| 5000 | 1.09 | 0.65 | 0.35 | 2303 | 2275 | 613 | 1.94  | 0.6407 | 0.6593 | 0.3407 | 0.3593 | 2052 | 2302 | 646 | 2174 | 2246 | 580 | 32.59  | 9.81   |
| 5000 | 1.10 | 0.65 | 0.35 | 2324 | 2275 | 613 | 2.38  | 0.6407 | 0.6593 | 0.3407 | 0.3593 | 2052 | 2302 | 646 | 2174 | 2246 | 580 | 37.96  | 12.53  |
| 5000 | 1.11 | 0.65 | 0.35 | 2345 | 2275 | 613 | 2.85  | 0.6407 | 0.6593 | 0.3407 | 0.3593 | 2052 | 2302 | 646 | 2174 | 2246 | 580 | 43.77  | 15.65  |
| 5000 | 1.12 | 0.65 | 0.35 | 2366 | 2275 | 613 | 3.37  | 0.6407 | 0.6593 | 0.3407 | 0.3593 | 2052 | 2302 | 646 | 2174 | 2246 | 580 | 50.02  | 19.18  |
| 5000 | 1.13 | 0.65 | 0.35 | 2387 | 2275 | 613 | 3.92  | 0.6407 | 0.6593 | 0.3407 | 0.3593 | 2052 | 2302 | 646 | 2174 | 2246 | 580 | 56.69  | 23.12  |
| 5000 | 1.14 | 0.65 | 0.35 | 2408 | 2275 | 613 | 4.51  | 0.6407 | 0.6593 | 0.3407 | 0.3593 | 2052 | 2302 | 646 | 2174 | 2246 | 580 | 63.81  | 27.48  |
| 5000 | 1.15 | 0.65 | 0.35 | 2429 | 2275 | 613 | 5.14  | 0.6407 | 0.6593 | 0.3407 | 0.3593 | 2052 | 2302 | 646 | 2174 | 2246 | 580 | 71.36  | 32.24  |
| 5000 | 1.16 | 0.65 | 0.35 | 2451 | 2275 | 613 | 5.80  | 0.6407 | 0.6593 | 0.3407 | 0.3593 | 2052 | 2302 | 646 | 2174 | 2246 | 580 | 79.34  | 37.42  |
| 5000 | 1.17 | 0.65 | 0.35 | 2472 | 2275 | 613 | 6.50  | 0.6407 | 0.6593 | 0.3407 | 0.3593 | 2052 | 2302 | 646 | 2174 | 2246 | 580 | 87.76  | 43.00  |
| 5000 | 1.18 | 0.65 | 0.35 | 2493 | 2275 | 613 | 7.23  | 0.6407 | 0.6593 | 0.3407 | 0.3593 | 2052 | 2302 | 646 | 2174 | 2246 | 580 | 96.61  | 49.00  |
| 5000 | 1.19 | 0.65 | 0.35 | 2514 | 2275 | 613 | 8.00  | 0.6407 | 0.6593 | 0.3407 | 0.3593 | 2052 | 2302 | 646 | 2174 | 2246 | 580 | 105.90 | 55.40  |
| 5000 | 1.20 | 0.65 | 0.35 | 2535 | 2275 | 613 | 8.79  | 0.6407 | 0.6593 | 0.3407 | 0.3593 | 2052 | 2302 | 646 | 2174 | 2246 | 580 | 115.62 | 62.22  |
| 5000 | 0.80 | 0.7  | 0.3  | 1960 | 2100 | 450 | 10.76 | 0.6910 | 0.7090 | 0.2910 | 0.3090 | 2388 | 2135 | 477 | 2513 | 2063 | 423 | 78.70  | 124.12 |
| 5000 | 0.81 | 0.7  | 0.3  | 1985 | 2100 | 450 | 9.60  | 0.6910 | 0.7090 | 0.2910 | 0.3090 | 2388 | 2135 | 477 | 2513 | 2063 | 423 | 70.18  | 113.57 |
| 5000 | 0.82 | 0.7  | 0.3  | 2009 | 2100 | 450 | 8.53  | 0.6910 | 0.7090 | 0.2910 | 0.3090 | 2388 | 2135 | 477 | 2513 | 2063 | 423 | 62.16  | 103.50 |
| 5000 | 0.83 | 0.7  | 0.3  | 2034 | 2100 | 450 | 7.53  | 0.6910 | 0.7090 | 0.2910 | 0.3090 | 2388 | 2135 | 477 | 2513 | 2063 | 423 | 54.64  | 93.91  |
| 5000 | 0.84 | 0.7  | 0.3  | 2058 | 2100 | 450 | 6.60  | 0.6910 | 0.7090 | 0.2910 | 0.3090 | 2388 | 2135 | 477 | 2513 | 2063 | 423 | 47.63  | 84.79  |
| 5000 | 0.85 | 0.7  | 0.3  | 2083 | 2100 | 450 | 5.74  | 0.6910 | 0.7090 | 0.2910 | 0.3090 | 2388 | 2135 | 477 | 2513 | 2063 | 423 | 41.12  | 76.15  |
| 5000 | 0.86 | 0.7  | 0.3  | 2107 | 2100 | 450 | 4.95  | 0.6910 | 0.7090 | 0.2910 | 0.3090 | 2388 | 2135 | 477 | 2513 | 2063 | 423 | 35.11  | 67.99  |
| 5000 | 0.87 | 0.7  | 0.3  | 2132 | 2100 | 450 | 4.22  | 0.6910 | 0.7090 | 0.2910 | 0.3090 | 2388 | 2135 | 477 | 2513 | 2063 | 423 | 29.60  | 60.31  |
| 5000 | 0.88 | 0.7  | 0.3  | 2156 | 2100 | 450 | 3.56  | 0.6910 | 0.7090 | 0.2910 | 0.3090 | 2388 | 2135 | 477 | 2513 | 2063 | 423 | 24.60  | 53.11  |
| 5000 | 0.89 | 0.7  | 0.3  | 2181 | 2100 | 450 | 2.96  | 0.6910 | 0.7090 | 0.2910 | 0.3090 | 2388 | 2135 | 477 | 2513 | 2063 | 423 | 20.10  | 46.38  |
| 5000 | 0.90 | 0.7  | 0.3  | 2205 | 2100 | 450 | 2.42  | 0.6910 | 0.7090 | 0.2910 | 0.3090 | 2388 | 2135 | 477 | 2513 | 2063 | 423 | 16.10  | 40.13  |
| 5000 | 0.91 | 0.7  | 0.3  | 2230 | 2100 | 450 | 1.94  | 0.6910 | 0.7090 | 0.2910 | 0.3090 | 2388 | 2135 | 477 | 2513 | 2063 | 423 | 12.60  | 34.36  |
| 5000 | 0.92 | 0.7  | 0.3  | 2254 | 2100 | 450 | 1.52  | 0.6910 | 0.7090 | 0.2910 | 0.3090 | 2388 | 2135 | 477 | 2513 | 2063 | 423 | 9.61   | 29.07  |
| 5000 | 0.93 | 0.7  | 0.3  | 2279 | 2100 | 450 | 1.15  | 0.6910 | 0.7090 | 0.2910 | 0.3090 | 2388 | 2135 | 477 | 2513 | 2063 | 423 | 7.12   | 24.25  |
| 5000 | 0.94 | 0.7  | 0.3  | 2303 | 2100 | 450 | 0.84  | 0.6910 | 0.7090 | 0.2910 | 0.3090 | 2388 | 2135 | 477 | 2513 | 2063 | 423 | 5.14   | 19.91  |
| 5000 | 0.95 | 0.7  | 0.3  | 2328 | 2100 | 450 | 0.58  | 0.6910 | 0.7090 | 0.2910 | 0.3090 | 2388 | 2135 | 477 | 2513 | 2063 | 423 | 3.65   | 16.05  |
| 5000 | 0.96 | 0.7  | 0.3  | 2352 | 2100 | 450 | 0.37  | 0.6910 | 0.7090 | 0.2910 | 0.3090 | 2388 | 2135 | 477 | 2513 | 2063 | 423 | 2.67   | 12.67  |
| 5000 | 0.97 | 0.7  | 0.3  | 2377 | 2100 | 450 | 0.20  | 0.6910 | 0.7090 | 0.2910 | 0.3090 | 2388 | 2135 | 477 | 2513 | 2063 | 423 | 2.20   | 9.76   |
| 5000 | 0.98 | 0.7  | 0.3  | 2401 | 2100 | 450 | 0.09  | 0.6910 | 0.7090 | 0.2910 | 0.3090 | 2388 | 2135 | 477 | 2513 | 2063 | 423 | 2.22   | 7.33   |



|      |      |      |      |      |      |     |      |        |        |        |        |      |      |     |      |      |     |        |        |
|------|------|------|------|------|------|-----|------|--------|--------|--------|--------|------|------|-----|------|------|-----|--------|--------|
| 5000 | 0.99 | 0.7  | 0.3  | 2426 | 2100 | 450 | 0.02 | 0.6910 | 0.7090 | 0.2910 | 0.3090 | 2388 | 2135 | 477 | 2513 | 2063 | 423 | 2.75   | 5.38   |
| 5000 | 1.00 | 0.7  | 0.3  | 2450 | 2100 | 450 | 0.00 | 0.6910 | 0.7090 | 0.2910 | 0.3090 | 2388 | 2135 | 477 | 2513 | 2063 | 423 | 3.78   | 3.91   |
| 5000 | 1.01 | 0.7  | 0.3  | 2475 | 2100 | 450 | 0.02 | 0.6910 | 0.7090 | 0.2910 | 0.3090 | 2388 | 2135 | 477 | 2513 | 2063 | 423 | 5.31   | 2.92   |
| 5000 | 1.02 | 0.7  | 0.3  | 2499 | 2100 | 450 | 0.09 | 0.6910 | 0.7090 | 0.2910 | 0.3090 | 2388 | 2135 | 477 | 2513 | 2063 | 423 | 7.35   | 2.40   |
| 5000 | 1.03 | 0.7  | 0.3  | 2524 | 2100 | 450 | 0.19 | 0.6910 | 0.7090 | 0.2910 | 0.3090 | 2388 | 2135 | 477 | 2513 | 2063 | 423 | 9.89   | 2.36   |
| 5000 | 1.04 | 0.7  | 0.3  | 2548 | 2100 | 450 | 0.34 | 0.6910 | 0.7090 | 0.2910 | 0.3090 | 2388 | 2135 | 477 | 2513 | 2063 | 423 | 12.93  | 2.80   |
| 5000 | 1.05 | 0.7  | 0.3  | 2573 | 2100 | 450 | 0.53 | 0.6910 | 0.7090 | 0.2910 | 0.3090 | 2388 | 2135 | 477 | 2513 | 2063 | 423 | 16.47  | 3.71   |
| 5000 | 1.06 | 0.7  | 0.3  | 2597 | 2100 | 450 | 0.75 | 0.6910 | 0.7090 | 0.2910 | 0.3090 | 2388 | 2135 | 477 | 2513 | 2063 | 423 | 20.52  | 5.11   |
| 5000 | 1.07 | 0.7  | 0.3  | 2622 | 2100 | 450 | 1.02 | 0.6910 | 0.7090 | 0.2910 | 0.3090 | 2388 | 2135 | 477 | 2513 | 2063 | 423 | 25.07  | 6.98   |
| 5000 | 1.08 | 0.7  | 0.3  | 2646 | 2100 | 450 | 1.32 | 0.6910 | 0.7090 | 0.2910 | 0.3090 | 2388 | 2135 | 477 | 2513 | 2063 | 423 | 30.13  | 9.33   |
| 5000 | 1.09 | 0.7  | 0.3  | 2671 | 2100 | 450 | 1.65 | 0.6910 | 0.7090 | 0.2910 | 0.3090 | 2388 | 2135 | 477 | 2513 | 2063 | 423 | 35.68  | 12.15  |
| 5000 | 1.10 | 0.7  | 0.3  | 2695 | 2100 | 450 | 2.02 | 0.6910 | 0.7090 | 0.2910 | 0.3090 | 2388 | 2135 | 477 | 2513 | 2063 | 423 | 41.74  | 15.46  |
| 5000 | 1.11 | 0.7  | 0.3  | 2720 | 2100 | 450 | 2.42 | 0.6910 | 0.7090 | 0.2910 | 0.3090 | 2388 | 2135 | 477 | 2513 | 2063 | 423 | 48.30  | 19.24  |
| 5000 | 1.12 | 0.7  | 0.3  | 2744 | 2100 | 450 | 2.86 | 0.6910 | 0.7090 | 0.2910 | 0.3090 | 2388 | 2135 | 477 | 2513 | 2063 | 423 | 55.37  | 23.50  |
| 5000 | 1.13 | 0.7  | 0.3  | 2769 | 2100 | 450 | 3.33 | 0.6910 | 0.7090 | 0.2910 | 0.3090 | 2388 | 2135 | 477 | 2513 | 2063 | 423 | 62.93  | 28.24  |
| 5000 | 1.14 | 0.7  | 0.3  | 2793 | 2100 | 450 | 3.83 | 0.6910 | 0.7090 | 0.2910 | 0.3090 | 2388 | 2135 | 477 | 2513 | 2063 | 423 | 71.00  | 33.45  |
| 5000 | 1.15 | 0.7  | 0.3  | 2818 | 2100 | 450 | 4.36 | 0.6910 | 0.7090 | 0.2910 | 0.3090 | 2388 | 2135 | 477 | 2513 | 2063 | 423 | 79.58  | 39.14  |
| 5000 | 1.16 | 0.7  | 0.3  | 2842 | 2100 | 450 | 4.92 | 0.6910 | 0.7090 | 0.2910 | 0.3090 | 2388 | 2135 | 477 | 2513 | 2063 | 423 | 88.65  | 45.31  |
| 5000 | 1.17 | 0.7  | 0.3  | 2867 | 2100 | 450 | 5.51 | 0.6910 | 0.7090 | 0.2910 | 0.3090 | 2388 | 2135 | 477 | 2513 | 2063 | 423 | 98.23  | 51.96  |
| 5000 | 1.18 | 0.7  | 0.3  | 2891 | 2100 | 450 | 6.13 | 0.6910 | 0.7090 | 0.2910 | 0.3090 | 2388 | 2135 | 477 | 2513 | 2063 | 423 | 108.31 | 59.09  |
| 5000 | 1.19 | 0.7  | 0.3  | 2916 | 2100 | 450 | 6.78 | 0.6910 | 0.7090 | 0.2910 | 0.3090 | 2388 | 2135 | 477 | 2513 | 2063 | 423 | 118.90 | 66.69  |
| 5000 | 1.20 | 0.7  | 0.3  | 2940 | 2100 | 450 | 7.45 | 0.6910 | 0.7090 | 0.2910 | 0.3090 | 2388 | 2135 | 477 | 2513 | 2063 | 423 | 129.98 | 74.77  |
| 5000 | 0.80 | 0.75 | 0.25 | 2250 | 1875 | 313 | 8.64 | 0.7415 | 0.7585 | 0.2415 | 0.2585 | 2749 | 1917 | 334 | 2877 | 1832 | 292 | 92.95  | 138.96 |
| 5000 | 0.81 | 0.75 | 0.25 | 2278 | 1875 | 313 | 7.71 | 0.7415 | 0.7585 | 0.2415 | 0.2585 | 2749 | 1917 | 334 | 2877 | 1832 | 292 | 83.02  | 126.99 |
| 5000 | 0.82 | 0.75 | 0.25 | 2306 | 1875 | 313 | 6.84 | 0.7415 | 0.7585 | 0.2415 | 0.2585 | 2749 | 1917 | 334 | 2877 | 1832 | 292 | 73.67  | 115.56 |
| 5000 | 0.83 | 0.75 | 0.25 | 2334 | 1875 | 313 | 6.04 | 0.7415 | 0.7585 | 0.2415 | 0.2585 | 2749 | 1917 | 334 | 2877 | 1832 | 292 | 64.90  | 104.69 |
| 5000 | 0.84 | 0.75 | 0.25 | 2363 | 1875 | 313 | 5.29 | 0.7415 | 0.7585 | 0.2415 | 0.2585 | 2749 | 1917 | 334 | 2877 | 1832 | 292 | 56.70  | 94.36  |
| 5000 | 0.85 | 0.75 | 0.25 | 2391 | 1875 | 313 | 4.60 | 0.7415 | 0.7585 | 0.2415 | 0.2585 | 2749 | 1917 | 334 | 2877 | 1832 | 292 | 49.07  | 84.58  |
| 5000 | 0.86 | 0.75 | 0.25 | 2419 | 1875 | 313 | 3.96 | 0.7415 | 0.7585 | 0.2415 | 0.2585 | 2749 | 1917 | 334 | 2877 | 1832 | 292 | 42.02  | 75.36  |
| 5000 | 0.87 | 0.75 | 0.25 | 2447 | 1875 | 313 | 3.38 | 0.7415 | 0.7585 | 0.2415 | 0.2585 | 2749 | 1917 | 334 | 2877 | 1832 | 292 | 35.55  | 66.68  |
| 5000 | 0.88 | 0.75 | 0.25 | 2475 | 1875 | 313 | 2.85 | 0.7415 | 0.7585 | 0.2415 | 0.2585 | 2749 | 1917 | 334 | 2877 | 1832 | 292 | 29.65  | 58.55  |
| 5000 | 0.89 | 0.75 | 0.25 | 2503 | 1875 | 313 | 2.37 | 0.7415 | 0.7585 | 0.2415 | 0.2585 | 2749 | 1917 | 334 | 2877 | 1832 | 292 | 24.33  | 50.98  |
| 5000 | 0.90 | 0.75 | 0.25 | 2531 | 1875 | 313 | 1.94 | 0.7415 | 0.7585 | 0.2415 | 0.2585 | 2749 | 1917 | 334 | 2877 | 1832 | 292 | 19.58  | 43.95  |
| 5000 | 0.91 | 0.75 | 0.25 | 2559 | 1875 | 313 | 1.55 | 0.7415 | 0.7585 | 0.2415 | 0.2585 | 2749 | 1917 | 334 | 2877 | 1832 | 292 | 15.41  | 37.47  |
| 5000 | 0.92 | 0.75 | 0.25 | 2588 | 1875 | 313 | 1.22 | 0.7415 | 0.7585 | 0.2415 | 0.2585 | 2749 | 1917 | 334 | 2877 | 1832 | 292 | 11.81  | 31.55  |

|      |      |      |      |      |      |     |      |        |        |        |        |      |      |     |      |      |     |        |        |
|------|------|------|------|------|------|-----|------|--------|--------|--------|--------|------|------|-----|------|------|-----|--------|--------|
| 5000 | 0.93 | 0.75 | 0.25 | 2616 | 1875 | 313 | 0.92 | 0.7415 | 0.7585 | 0.2415 | 0.2585 | 2749 | 1917 | 334 | 2877 | 1832 | 292 | 8.79   | 26.17  |
| 5000 | 0.94 | 0.75 | 0.25 | 2644 | 1875 | 313 | 0.67 | 0.7415 | 0.7585 | 0.2415 | 0.2585 | 2749 | 1917 | 334 | 2877 | 1832 | 292 | 6.35   | 21.34  |
| 5000 | 0.95 | 0.75 | 0.25 | 2672 | 1875 | 313 | 0.46 | 0.7415 | 0.7585 | 0.2415 | 0.2585 | 2749 | 1917 | 334 | 2877 | 1832 | 292 | 4.48   | 17.07  |
| 5000 | 0.96 | 0.75 | 0.25 | 2700 | 1875 | 313 | 0.29 | 0.7415 | 0.7585 | 0.2415 | 0.2585 | 2749 | 1917 | 334 | 2877 | 1832 | 292 | 3.18   | 13.34  |
| 5000 | 0.97 | 0.75 | 0.25 | 2728 | 1875 | 313 | 0.16 | 0.7415 | 0.7585 | 0.2415 | 0.2585 | 2749 | 1917 | 334 | 2877 | 1832 | 292 | 2.46   | 10.16  |
| 5000 | 0.98 | 0.75 | 0.25 | 2756 | 1875 | 313 | 0.07 | 0.7415 | 0.7585 | 0.2415 | 0.2585 | 2749 | 1917 | 334 | 2877 | 1832 | 292 | 2.32   | 7.54   |
| 5000 | 0.99 | 0.75 | 0.25 | 2784 | 1875 | 313 | 0.02 | 0.7415 | 0.7585 | 0.2415 | 0.2585 | 2749 | 1917 | 334 | 2877 | 1832 | 292 | 2.75   | 5.46   |
| 5000 | 1.00 | 0.75 | 0.25 | 2813 | 1875 | 313 | 0.00 | 0.7415 | 0.7585 | 0.2415 | 0.2585 | 2749 | 1917 | 334 | 2877 | 1832 | 292 | 3.76   | 3.93   |
| 5000 | 1.01 | 0.75 | 0.25 | 2841 | 1875 | 313 | 0.02 | 0.7415 | 0.7585 | 0.2415 | 0.2585 | 2749 | 1917 | 334 | 2877 | 1832 | 292 | 5.34   | 2.96   |
| 5000 | 1.02 | 0.75 | 0.25 | 2869 | 1875 | 313 | 0.07 | 0.7415 | 0.7585 | 0.2415 | 0.2585 | 2749 | 1917 | 334 | 2877 | 1832 | 292 | 7.50   | 2.53   |
| 5000 | 1.03 | 0.75 | 0.25 | 2897 | 1875 | 313 | 0.15 | 0.7415 | 0.7585 | 0.2415 | 0.2585 | 2749 | 1917 | 334 | 2877 | 1832 | 292 | 10.23  | 2.65   |
| 5000 | 1.04 | 0.75 | 0.25 | 2925 | 1875 | 313 | 0.27 | 0.7415 | 0.7585 | 0.2415 | 0.2585 | 2749 | 1917 | 334 | 2877 | 1832 | 292 | 13.54  | 3.33   |
| 5000 | 1.05 | 0.75 | 0.25 | 2953 | 1875 | 313 | 0.42 | 0.7415 | 0.7585 | 0.2415 | 0.2585 | 2749 | 1917 | 334 | 2877 | 1832 | 292 | 17.43  | 4.55   |
| 5000 | 1.06 | 0.75 | 0.25 | 2981 | 1875 | 313 | 0.60 | 0.7415 | 0.7585 | 0.2415 | 0.2585 | 2749 | 1917 | 334 | 2877 | 1832 | 292 | 21.89  | 6.32   |
| 5000 | 1.07 | 0.75 | 0.25 | 3009 | 1875 | 313 | 0.81 | 0.7415 | 0.7585 | 0.2415 | 0.2585 | 2749 | 1917 | 334 | 2877 | 1832 | 292 | 26.92  | 8.65   |
| 5000 | 1.08 | 0.75 | 0.25 | 3038 | 1875 | 313 | 1.05 | 0.7415 | 0.7585 | 0.2415 | 0.2585 | 2749 | 1917 | 334 | 2877 | 1832 | 292 | 32.53  | 11.52  |
| 5000 | 1.09 | 0.75 | 0.25 | 3066 | 1875 | 313 | 1.31 | 0.7415 | 0.7585 | 0.2415 | 0.2585 | 2749 | 1917 | 334 | 2877 | 1832 | 292 | 38.72  | 14.94  |
| 5000 | 1.10 | 0.75 | 0.25 | 3094 | 1875 | 313 | 1.61 | 0.7415 | 0.7585 | 0.2415 | 0.2585 | 2749 | 1917 | 334 | 2877 | 1832 | 292 | 45.48  | 18.91  |
| 5000 | 1.11 | 0.75 | 0.25 | 3122 | 1875 | 313 | 1.93 | 0.7415 | 0.7585 | 0.2415 | 0.2585 | 2749 | 1917 | 334 | 2877 | 1832 | 292 | 52.82  | 23.44  |
| 5000 | 1.12 | 0.75 | 0.25 | 3150 | 1875 | 313 | 2.27 | 0.7415 | 0.7585 | 0.2415 | 0.2585 | 2749 | 1917 | 334 | 2877 | 1832 | 292 | 60.73  | 28.51  |
| 5000 | 1.13 | 0.75 | 0.25 | 3178 | 1875 | 313 | 2.65 | 0.7415 | 0.7585 | 0.2415 | 0.2585 | 2749 | 1917 | 334 | 2877 | 1832 | 292 | 69.22  | 34.13  |
| 5000 | 1.14 | 0.75 | 0.25 | 3206 | 1875 | 313 | 3.04 | 0.7415 | 0.7585 | 0.2415 | 0.2585 | 2749 | 1917 | 334 | 2877 | 1832 | 292 | 78.28  | 40.31  |
| 5000 | 1.15 | 0.75 | 0.25 | 3234 | 1875 | 313 | 3.47 | 0.7415 | 0.7585 | 0.2415 | 0.2585 | 2749 | 1917 | 334 | 2877 | 1832 | 292 | 87.92  | 47.03  |
| 5000 | 1.16 | 0.75 | 0.25 | 3263 | 1875 | 313 | 3.91 | 0.7415 | 0.7585 | 0.2415 | 0.2585 | 2749 | 1917 | 334 | 2877 | 1832 | 292 | 98.14  | 54.30  |
| 5000 | 1.17 | 0.75 | 0.25 | 3291 | 1875 | 313 | 4.38 | 0.7415 | 0.7585 | 0.2415 | 0.2585 | 2749 | 1917 | 334 | 2877 | 1832 | 292 | 108.93 | 62.13  |
| 5000 | 1.18 | 0.75 | 0.25 | 3319 | 1875 | 313 | 4.87 | 0.7415 | 0.7585 | 0.2415 | 0.2585 | 2749 | 1917 | 334 | 2877 | 1832 | 292 | 120.29 | 70.50  |
| 5000 | 1.19 | 0.75 | 0.25 | 3347 | 1875 | 313 | 5.38 | 0.7415 | 0.7585 | 0.2415 | 0.2585 | 2749 | 1917 | 334 | 2877 | 1832 | 292 | 132.23 | 79.42  |
| 5000 | 1.20 | 0.75 | 0.25 | 3375 | 1875 | 313 | 5.91 | 0.7415 | 0.7585 | 0.2415 | 0.2585 | 2749 | 1917 | 334 | 2877 | 1832 | 292 | 144.75 | 88.89  |
| 5000 | 0.80 | 0.8  | 0.2  | 2560 | 1600 | 200 | 6.33 | 0.7922 | 0.8078 | 0.1922 | 0.2078 | 3138 | 1646 | 216 | 3263 | 1552 | 185 | 108.82 | 154.21 |
| 5000 | 0.81 | 0.8  | 0.2  | 2592 | 1600 | 200 | 5.64 | 0.7922 | 0.8078 | 0.1922 | 0.2078 | 3138 | 1646 | 216 | 3263 | 1552 | 185 | 97.36  | 140.74 |
| 5000 | 0.82 | 0.8  | 0.2  | 2624 | 1600 | 200 | 5.01 | 0.7922 | 0.8078 | 0.1922 | 0.2078 | 3138 | 1646 | 216 | 3263 | 1552 | 185 | 86.56  | 127.89 |
| 5000 | 0.83 | 0.8  | 0.2  | 2656 | 1600 | 200 | 4.42 | 0.7922 | 0.8078 | 0.1922 | 0.2078 | 3138 | 1646 | 216 | 3263 | 1552 | 185 | 76.41  | 115.67 |
| 5000 | 0.84 | 0.8  | 0.2  | 2688 | 1600 | 200 | 3.87 | 0.7922 | 0.8078 | 0.1922 | 0.2078 | 3138 | 1646 | 216 | 3263 | 1552 | 185 | 66.91  | 104.08 |
| 5000 | 0.85 | 0.8  | 0.2  | 2720 | 1600 | 200 | 3.36 | 0.7922 | 0.8078 | 0.1922 | 0.2078 | 3138 | 1646 | 216 | 3263 | 1552 | 185 | 58.07  | 93.11  |
| 5000 | 0.86 | 0.8  | 0.2  | 2752 | 1600 | 200 | 2.90 | 0.7922 | 0.8078 | 0.1922 | 0.2078 | 3138 | 1646 | 216 | 3263 | 1552 | 185 | 49.88  | 82.78  |

|      |      |      |      |      |      |     |      |        |        |        |        |      |      |     |      |      |     |        |        |
|------|------|------|------|------|------|-----|------|--------|--------|--------|--------|------|------|-----|------|------|-----|--------|--------|
| 5000 | 0.87 | 0.8  | 0.2  | 2784 | 1600 | 200 | 2.47 | 0.7922 | 0.8078 | 0.1922 | 0.2078 | 3138 | 1646 | 216 | 3263 | 1552 | 185 | 42.34  | 73.07  |
| 5000 | 0.88 | 0.8  | 0.2  | 2816 | 1600 | 200 | 2.08 | 0.7922 | 0.8078 | 0.1922 | 0.2078 | 3138 | 1646 | 216 | 3263 | 1552 | 185 | 35.45  | 63.98  |
| 5000 | 0.89 | 0.8  | 0.2  | 2848 | 1600 | 200 | 1.73 | 0.7922 | 0.8078 | 0.1922 | 0.2078 | 3138 | 1646 | 216 | 3263 | 1552 | 185 | 29.22  | 55.53  |
| 5000 | 0.90 | 0.8  | 0.2  | 2880 | 1600 | 200 | 1.42 | 0.7922 | 0.8078 | 0.1922 | 0.2078 | 3138 | 1646 | 216 | 3263 | 1552 | 185 | 23.64  | 47.70  |
| 5000 | 0.91 | 0.8  | 0.2  | 2912 | 1600 | 200 | 1.13 | 0.7922 | 0.8078 | 0.1922 | 0.2078 | 3138 | 1646 | 216 | 3263 | 1552 | 185 | 18.71  | 40.51  |
| 5000 | 0.92 | 0.8  | 0.2  | 2944 | 1600 | 200 | 0.89 | 0.7922 | 0.8078 | 0.1922 | 0.2078 | 3138 | 1646 | 216 | 3263 | 1552 | 185 | 14.44  | 33.93  |
| 5000 | 0.93 | 0.8  | 0.2  | 2976 | 1600 | 200 | 0.67 | 0.7922 | 0.8078 | 0.1922 | 0.2078 | 3138 | 1646 | 216 | 3263 | 1552 | 185 | 10.81  | 27.99  |
| 5000 | 0.94 | 0.8  | 0.2  | 3008 | 1600 | 200 | 0.49 | 0.7922 | 0.8078 | 0.1922 | 0.2078 | 3138 | 1646 | 216 | 3263 | 1552 | 185 | 7.84   | 22.67  |
| 5000 | 0.95 | 0.8  | 0.2  | 3040 | 1600 | 200 | 0.34 | 0.7922 | 0.8078 | 0.1922 | 0.2078 | 3138 | 1646 | 216 | 3263 | 1552 | 185 | 5.53   | 17.99  |
| 5000 | 0.96 | 0.8  | 0.2  | 3072 | 1600 | 200 | 0.21 | 0.7922 | 0.8078 | 0.1922 | 0.2078 | 3138 | 1646 | 216 | 3263 | 1552 | 185 | 3.86   | 13.93  |
| 5000 | 0.97 | 0.8  | 0.2  | 3104 | 1600 | 200 | 0.12 | 0.7922 | 0.8078 | 0.1922 | 0.2078 | 3138 | 1646 | 216 | 3263 | 1552 | 185 | 2.85   | 10.49  |
| 5000 | 0.98 | 0.8  | 0.2  | 3136 | 1600 | 200 | 0.05 | 0.7922 | 0.8078 | 0.1922 | 0.2078 | 3138 | 1646 | 216 | 3263 | 1552 | 185 | 2.49   | 7.69   |
| 5000 | 0.99 | 0.8  | 0.2  | 3168 | 1600 | 200 | 0.01 | 0.7922 | 0.8078 | 0.1922 | 0.2078 | 3138 | 1646 | 216 | 3263 | 1552 | 185 | 2.79   | 5.51   |
| 5000 | 1.00 | 0.8  | 0.2  | 3200 | 1600 | 200 | 0.00 | 0.7922 | 0.8078 | 0.1922 | 0.2078 | 3138 | 1646 | 216 | 3263 | 1552 | 185 | 3.73   | 3.96   |
| 5000 | 1.01 | 0.8  | 0.2  | 3232 | 1600 | 200 | 0.01 | 0.7922 | 0.8078 | 0.1922 | 0.2078 | 3138 | 1646 | 216 | 3263 | 1552 | 185 | 5.33   | 3.04   |
| 5000 | 1.02 | 0.8  | 0.2  | 3264 | 1600 | 200 | 0.05 | 0.7922 | 0.8078 | 0.1922 | 0.2078 | 3138 | 1646 | 216 | 3263 | 1552 | 185 | 7.59   | 2.74   |
| 5000 | 1.03 | 0.8  | 0.2  | 3296 | 1600 | 200 | 0.11 | 0.7922 | 0.8078 | 0.1922 | 0.2078 | 3138 | 1646 | 216 | 3263 | 1552 | 185 | 10.49  | 3.08   |
| 5000 | 1.04 | 0.8  | 0.2  | 3328 | 1600 | 200 | 0.20 | 0.7922 | 0.8078 | 0.1922 | 0.2078 | 3138 | 1646 | 216 | 3263 | 1552 | 185 | 14.05  | 4.04   |
| 5000 | 1.05 | 0.8  | 0.2  | 3360 | 1600 | 200 | 0.31 | 0.7922 | 0.8078 | 0.1922 | 0.2078 | 3138 | 1646 | 216 | 3263 | 1552 | 185 | 18.26  | 5.62   |
| 5000 | 1.06 | 0.8  | 0.2  | 3392 | 1600 | 200 | 0.44 | 0.7922 | 0.8078 | 0.1922 | 0.2078 | 3138 | 1646 | 216 | 3263 | 1552 | 185 | 23.12  | 7.84   |
| 5000 | 1.07 | 0.8  | 0.2  | 3424 | 1600 | 200 | 0.59 | 0.7922 | 0.8078 | 0.1922 | 0.2078 | 3138 | 1646 | 216 | 3263 | 1552 | 185 | 28.64  | 10.68  |
| 5000 | 1.08 | 0.8  | 0.2  | 3456 | 1600 | 200 | 0.76 | 0.7922 | 0.8078 | 0.1922 | 0.2078 | 3138 | 1646 | 216 | 3263 | 1552 | 185 | 34.81  | 14.16  |
| 5000 | 1.09 | 0.8  | 0.2  | 3488 | 1600 | 200 | 0.95 | 0.7922 | 0.8078 | 0.1922 | 0.2078 | 3138 | 1646 | 216 | 3263 | 1552 | 185 | 41.63  | 18.25  |
| 5000 | 1.10 | 0.8  | 0.2  | 3520 | 1600 | 200 | 1.17 | 0.7922 | 0.8078 | 0.1922 | 0.2078 | 3138 | 1646 | 216 | 3263 | 1552 | 185 | 49.10  | 22.98  |
| 5000 | 1.11 | 0.8  | 0.2  | 3552 | 1600 | 200 | 1.40 | 0.7922 | 0.8078 | 0.1922 | 0.2078 | 3138 | 1646 | 216 | 3263 | 1552 | 185 | 57.23  | 28.33  |
| 5000 | 1.12 | 0.8  | 0.2  | 3584 | 1600 | 200 | 1.65 | 0.7922 | 0.8078 | 0.1922 | 0.2078 | 3138 | 1646 | 216 | 3263 | 1552 | 185 | 66.01  | 34.32  |
| 5000 | 1.13 | 0.8  | 0.2  | 3616 | 1600 | 200 | 1.92 | 0.7922 | 0.8078 | 0.1922 | 0.2078 | 3138 | 1646 | 216 | 3263 | 1552 | 185 | 75.44  | 40.93  |
| 5000 | 1.14 | 0.8  | 0.2  | 3648 | 1600 | 200 | 2.21 | 0.7922 | 0.8078 | 0.1922 | 0.2078 | 3138 | 1646 | 216 | 3263 | 1552 | 185 | 85.52  | 48.16  |
| 5000 | 1.15 | 0.8  | 0.2  | 3680 | 1600 | 200 | 2.52 | 0.7922 | 0.8078 | 0.1922 | 0.2078 | 3138 | 1646 | 216 | 3263 | 1552 | 185 | 96.26  | 56.03  |
| 5000 | 1.16 | 0.8  | 0.2  | 3712 | 1600 | 200 | 2.84 | 0.7922 | 0.8078 | 0.1922 | 0.2078 | 3138 | 1646 | 216 | 3263 | 1552 | 185 | 107.65 | 64.52  |
| 5000 | 1.17 | 0.8  | 0.2  | 3744 | 1600 | 200 | 3.18 | 0.7922 | 0.8078 | 0.1922 | 0.2078 | 3138 | 1646 | 216 | 3263 | 1552 | 185 | 119.70 | 73.64  |
| 5000 | 1.18 | 0.8  | 0.2  | 3776 | 1600 | 200 | 3.53 | 0.7922 | 0.8078 | 0.1922 | 0.2078 | 3138 | 1646 | 216 | 3263 | 1552 | 185 | 132.39 | 83.39  |
| 5000 | 1.19 | 0.8  | 0.2  | 3808 | 1600 | 200 | 3.91 | 0.7922 | 0.8078 | 0.1922 | 0.2078 | 3138 | 1646 | 216 | 3263 | 1552 | 185 | 145.74 | 93.76  |
| 5000 | 1.20 | 0.8  | 0.2  | 3840 | 1600 | 200 | 4.29 | 0.7922 | 0.8078 | 0.1922 | 0.2078 | 3138 | 1646 | 216 | 3263 | 1552 | 185 | 159.74 | 104.76 |
| 5000 | 0.80 | 0.85 | 0.15 | 2890 | 1275 | 113 | 4.04 | 0.8430 | 0.8570 | 0.1430 | 0.1570 | 3553 | 1324 | 123 | 3672 | 1226 | 102 | 126.52 | 169.65 |

|      |      |      |      |      |      |     |      |        |        |        |        |      |      |     |      |      |     |        |        |
|------|------|------|------|------|------|-----|------|--------|--------|--------|--------|------|------|-----|------|------|-----|--------|--------|
| 5000 | 0.81 | 0.85 | 0.15 | 2926 | 1275 | 113 | 3.60 | 0.8430 | 0.8570 | 0.1430 | 0.1570 | 3553 | 1324 | 123 | 3672 | 1226 | 102 | 113.40 | 154.62 |
| 5000 | 0.82 | 0.85 | 0.15 | 2962 | 1275 | 113 | 3.19 | 0.8430 | 0.8570 | 0.1430 | 0.1570 | 3553 | 1324 | 123 | 3672 | 1226 | 102 | 101.01 | 140.29 |
| 5000 | 0.83 | 0.85 | 0.15 | 2998 | 1275 | 113 | 2.82 | 0.8430 | 0.8570 | 0.1430 | 0.1570 | 3553 | 1324 | 123 | 3672 | 1226 | 102 | 89.36  | 126.68 |
| 5000 | 0.84 | 0.85 | 0.15 | 3035 | 1275 | 113 | 2.47 | 0.8430 | 0.8570 | 0.1430 | 0.1570 | 3553 | 1324 | 123 | 3672 | 1226 | 102 | 78.45  | 113.78 |
| 5000 | 0.85 | 0.85 | 0.15 | 3071 | 1275 | 113 | 2.14 | 0.8430 | 0.8570 | 0.1430 | 0.1570 | 3553 | 1324 | 123 | 3672 | 1226 | 102 | 68.27  | 101.59 |
| 5000 | 0.86 | 0.85 | 0.15 | 3107 | 1275 | 113 | 1.84 | 0.8430 | 0.8570 | 0.1430 | 0.1570 | 3553 | 1324 | 123 | 3672 | 1226 | 102 | 58.82  | 90.10  |
| 5000 | 0.87 | 0.85 | 0.15 | 3143 | 1275 | 113 | 1.57 | 0.8430 | 0.8570 | 0.1430 | 0.1570 | 3553 | 1324 | 123 | 3672 | 1226 | 102 | 50.11  | 79.33  |
| 5000 | 0.88 | 0.85 | 0.15 | 3179 | 1275 | 113 | 1.33 | 0.8430 | 0.8570 | 0.1430 | 0.1570 | 3553 | 1324 | 123 | 3672 | 1226 | 102 | 42.13  | 69.27  |
| 5000 | 0.89 | 0.85 | 0.15 | 3215 | 1275 | 113 | 1.10 | 0.8430 | 0.8570 | 0.1430 | 0.1570 | 3553 | 1324 | 123 | 3672 | 1226 | 102 | 34.89  | 59.93  |
| 5000 | 0.90 | 0.85 | 0.15 | 3251 | 1275 | 113 | 0.90 | 0.8430 | 0.8570 | 0.1430 | 0.1570 | 3553 | 1324 | 123 | 3672 | 1226 | 102 | 28.38  | 51.29  |
| 5000 | 0.91 | 0.85 | 0.15 | 3287 | 1275 | 113 | 0.72 | 0.8430 | 0.8570 | 0.1430 | 0.1570 | 3553 | 1324 | 123 | 3672 | 1226 | 102 | 22.61  | 43.36  |
| 5000 | 0.92 | 0.85 | 0.15 | 3324 | 1275 | 113 | 0.56 | 0.8430 | 0.8570 | 0.1430 | 0.1570 | 3553 | 1324 | 123 | 3672 | 1226 | 102 | 17.57  | 36.14  |
| 5000 | 0.93 | 0.85 | 0.15 | 3360 | 1275 | 113 | 0.43 | 0.8430 | 0.8570 | 0.1430 | 0.1570 | 3553 | 1324 | 123 | 3672 | 1226 | 102 | 13.27  | 29.64  |
| 5000 | 0.94 | 0.85 | 0.15 | 3396 | 1275 | 113 | 0.31 | 0.8430 | 0.8570 | 0.1430 | 0.1570 | 3553 | 1324 | 123 | 3672 | 1226 | 102 | 9.70   | 23.84  |
| 5000 | 0.95 | 0.85 | 0.15 | 3432 | 1275 | 113 | 0.21 | 0.8430 | 0.8570 | 0.1430 | 0.1570 | 3553 | 1324 | 123 | 3672 | 1226 | 102 | 6.86   | 18.76  |
| 5000 | 0.96 | 0.85 | 0.15 | 3468 | 1275 | 113 | 0.14 | 0.8430 | 0.8570 | 0.1430 | 0.1570 | 3553 | 1324 | 123 | 3672 | 1226 | 102 | 4.76   | 14.38  |
| 5000 | 0.97 | 0.85 | 0.15 | 3504 | 1275 | 113 | 0.08 | 0.8430 | 0.8570 | 0.1430 | 0.1570 | 3553 | 1324 | 123 | 3672 | 1226 | 102 | 3.39   | 10.72  |
| 5000 | 0.98 | 0.85 | 0.15 | 3540 | 1275 | 113 | 0.03 | 0.8430 | 0.8570 | 0.1430 | 0.1570 | 3553 | 1324 | 123 | 3672 | 1226 | 102 | 2.76   | 7.77   |
| 5000 | 0.99 | 0.85 | 0.15 | 3576 | 1275 | 113 | 0.01 | 0.8430 | 0.8570 | 0.1430 | 0.1570 | 3553 | 1324 | 123 | 3672 | 1226 | 102 | 2.86   | 5.53   |
| 5000 | 1.00 | 0.85 | 0.15 | 3613 | 1275 | 113 | 0.00 | 0.8430 | 0.8570 | 0.1430 | 0.1570 | 3553 | 1324 | 123 | 3672 | 1226 | 102 | 3.70   | 4.00   |
| 5000 | 1.01 | 0.85 | 0.15 | 3649 | 1275 | 113 | 0.01 | 0.8430 | 0.8570 | 0.1430 | 0.1570 | 3553 | 1324 | 123 | 3672 | 1226 | 102 | 5.27   | 3.18   |
| 5000 | 1.02 | 0.85 | 0.15 | 3685 | 1275 | 113 | 0.03 | 0.8430 | 0.8570 | 0.1430 | 0.1570 | 3553 | 1324 | 123 | 3672 | 1226 | 102 | 7.58   | 3.07   |
| 5000 | 1.03 | 0.85 | 0.15 | 3721 | 1275 | 113 | 0.07 | 0.8430 | 0.8570 | 0.1430 | 0.1570 | 3553 | 1324 | 123 | 3672 | 1226 | 102 | 10.62  | 3.67   |
| 5000 | 1.04 | 0.85 | 0.15 | 3757 | 1275 | 113 | 0.13 | 0.8430 | 0.8570 | 0.1430 | 0.1570 | 3553 | 1324 | 123 | 3672 | 1226 | 102 | 14.40  | 4.98   |
| 5000 | 1.05 | 0.85 | 0.15 | 3793 | 1275 | 113 | 0.19 | 0.8430 | 0.8570 | 0.1430 | 0.1570 | 3553 | 1324 | 123 | 3672 | 1226 | 102 | 18.91  | 7.01   |
| 5000 | 1.06 | 0.85 | 0.15 | 3829 | 1275 | 113 | 0.28 | 0.8430 | 0.8570 | 0.1430 | 0.1570 | 3553 | 1324 | 123 | 3672 | 1226 | 102 | 24.15  | 9.74   |
| 5000 | 1.07 | 0.85 | 0.15 | 3865 | 1275 | 113 | 0.37 | 0.8430 | 0.8570 | 0.1430 | 0.1570 | 3553 | 1324 | 123 | 3672 | 1226 | 102 | 30.13  | 13.18  |
| 5000 | 1.08 | 0.85 | 0.15 | 3902 | 1275 | 113 | 0.48 | 0.8430 | 0.8570 | 0.1430 | 0.1570 | 3553 | 1324 | 123 | 3672 | 1226 | 102 | 36.84  | 17.34  |
| 5000 | 1.09 | 0.85 | 0.15 | 3938 | 1275 | 113 | 0.61 | 0.8430 | 0.8570 | 0.1430 | 0.1570 | 3553 | 1324 | 123 | 3672 | 1226 | 102 | 44.29  | 22.21  |
| 5000 | 1.10 | 0.85 | 0.15 | 3974 | 1275 | 113 | 0.74 | 0.8430 | 0.8570 | 0.1430 | 0.1570 | 3553 | 1324 | 123 | 3672 | 1226 | 102 | 52.48  | 27.78  |
| 5000 | 1.11 | 0.85 | 0.15 | 4010 | 1275 | 113 | 0.89 | 0.8430 | 0.8570 | 0.1430 | 0.1570 | 3553 | 1324 | 123 | 3672 | 1226 | 102 | 61.39  | 34.07  |
| 5000 | 1.12 | 0.85 | 0.15 | 4046 | 1275 | 113 | 1.05 | 0.8430 | 0.8570 | 0.1430 | 0.1570 | 3553 | 1324 | 123 | 3672 | 1226 | 102 | 71.04  | 41.07  |
| 5000 | 1.13 | 0.85 | 0.15 | 4082 | 1275 | 113 | 1.22 | 0.8430 | 0.8570 | 0.1430 | 0.1570 | 3553 | 1324 | 123 | 3672 | 1226 | 102 | 81.43  | 48.78  |
| 5000 | 1.14 | 0.85 | 0.15 | 4118 | 1275 | 113 | 1.40 | 0.8430 | 0.8570 | 0.1430 | 0.1570 | 3553 | 1324 | 123 | 3672 | 1226 | 102 | 92.55  | 57.20  |
| 5000 | 1.15 | 0.85 | 0.15 | 4154 | 1275 | 113 | 1.59 | 0.8430 | 0.8570 | 0.1430 | 0.1570 | 3553 | 1324 | 123 | 3672 | 1226 | 102 | 104.41 | 66.33  |

|      |      |      |      |      |      |     |      |        |        |        |        |      |      |     |      |      |     |        |        |
|------|------|------|------|------|------|-----|------|--------|--------|--------|--------|------|------|-----|------|------|-----|--------|--------|
| 5000 | 1.16 | 0.85 | 0.15 | 4191 | 1275 | 113 | 1.80 | 0.8430 | 0.8570 | 0.1430 | 0.1570 | 3553 | 1324 | 123 | 3672 | 1226 | 102 | 117.00 | 76.17  |
| 5000 | 1.17 | 0.85 | 0.15 | 4227 | 1275 | 113 | 2.01 | 0.8430 | 0.8570 | 0.1430 | 0.1570 | 3553 | 1324 | 123 | 3672 | 1226 | 102 | 130.32 | 86.72  |
| 5000 | 1.18 | 0.85 | 0.15 | 4263 | 1275 | 113 | 2.24 | 0.8430 | 0.8570 | 0.1430 | 0.1570 | 3553 | 1324 | 123 | 3672 | 1226 | 102 | 144.38 | 97.98  |
| 5000 | 1.19 | 0.85 | 0.15 | 4299 | 1275 | 113 | 2.47 | 0.8430 | 0.8570 | 0.1430 | 0.1570 | 3553 | 1324 | 123 | 3672 | 1226 | 102 | 159.17 | 109.96 |
| 5000 | 1.20 | 0.85 | 0.15 | 4335 | 1275 | 113 | 2.72 | 0.8430 | 0.8570 | 0.1430 | 0.1570 | 3553 | 1324 | 123 | 3672 | 1226 | 102 | 174.70 | 122.64 |
| 5000 | 0.80 | 0.9  | 0.1  | 3240 | 900  | 50  | 2.02 | 0.8941 | 0.9059 | 0.0941 | 0.1059 | 3997 | 947  | 56  | 4103 | 853  | 44  | 146.41 | 184.92 |
| 5000 | 0.81 | 0.9  | 0.1  | 3281 | 900  | 50  | 1.80 | 0.8941 | 0.9059 | 0.0941 | 0.1059 | 3997 | 947  | 56  | 4103 | 853  | 44  | 131.48 | 168.28 |
| 5000 | 0.82 | 0.9  | 0.1  | 3321 | 900  | 50  | 1.60 | 0.8941 | 0.9059 | 0.0941 | 0.1059 | 3997 | 947  | 56  | 4103 | 853  | 44  | 117.36 | 152.44 |
| 5000 | 0.83 | 0.9  | 0.1  | 3362 | 900  | 50  | 1.41 | 0.8941 | 0.9059 | 0.0941 | 0.1059 | 3997 | 947  | 56  | 4103 | 853  | 44  | 104.07 | 137.40 |
| 5000 | 0.84 | 0.9  | 0.1  | 3402 | 900  | 50  | 1.23 | 0.8941 | 0.9059 | 0.0941 | 0.1059 | 3997 | 947  | 56  | 4103 | 853  | 44  | 91.60  | 123.16 |
| 5000 | 0.85 | 0.9  | 0.1  | 3443 | 900  | 50  | 1.07 | 0.8941 | 0.9059 | 0.0941 | 0.1059 | 3997 | 947  | 56  | 4103 | 853  | 44  | 79.95  | 109.72 |
| 5000 | 0.86 | 0.9  | 0.1  | 3483 | 900  | 50  | 0.92 | 0.8941 | 0.9059 | 0.0941 | 0.1059 | 3997 | 947  | 56  | 4103 | 853  | 44  | 69.12  | 97.08  |
| 5000 | 0.87 | 0.9  | 0.1  | 3524 | 900  | 50  | 0.79 | 0.8941 | 0.9059 | 0.0941 | 0.1059 | 3997 | 947  | 56  | 4103 | 853  | 44  | 59.11  | 85.24  |
| 5000 | 0.88 | 0.9  | 0.1  | 3564 | 900  | 50  | 0.66 | 0.8941 | 0.9059 | 0.0941 | 0.1059 | 3997 | 947  | 56  | 4103 | 853  | 44  | 49.92  | 74.20  |
| 5000 | 0.89 | 0.9  | 0.1  | 3605 | 900  | 50  | 0.55 | 0.8941 | 0.9059 | 0.0941 | 0.1059 | 3997 | 947  | 56  | 4103 | 853  | 44  | 41.55  | 63.96  |
| 5000 | 0.90 | 0.9  | 0.1  | 3645 | 900  | 50  | 0.45 | 0.8941 | 0.9059 | 0.0941 | 0.1059 | 3997 | 947  | 56  | 4103 | 853  | 44  | 34.00  | 54.51  |
| 5000 | 0.91 | 0.9  | 0.1  | 3686 | 900  | 50  | 0.36 | 0.8941 | 0.9059 | 0.0941 | 0.1059 | 3997 | 947  | 56  | 4103 | 853  | 44  | 27.27  | 45.87  |
| 5000 | 0.92 | 0.9  | 0.1  | 3726 | 900  | 50  | 0.28 | 0.8941 | 0.9059 | 0.0941 | 0.1059 | 3997 | 947  | 56  | 4103 | 853  | 44  | 21.36  | 38.03  |
| 5000 | 0.93 | 0.9  | 0.1  | 3767 | 900  | 50  | 0.21 | 0.8941 | 0.9059 | 0.0941 | 0.1059 | 3997 | 947  | 56  | 4103 | 853  | 44  | 16.28  | 30.98  |
| 5000 | 0.94 | 0.9  | 0.1  | 3807 | 900  | 50  | 0.16 | 0.8941 | 0.9059 | 0.0941 | 0.1059 | 3997 | 947  | 56  | 4103 | 853  | 44  | 12.01  | 24.74  |
| 5000 | 0.95 | 0.9  | 0.1  | 3848 | 900  | 50  | 0.11 | 0.8941 | 0.9059 | 0.0941 | 0.1059 | 3997 | 947  | 56  | 4103 | 853  | 44  | 8.57   | 19.29  |
| 5000 | 0.96 | 0.9  | 0.1  | 3888 | 900  | 50  | 0.07 | 0.8941 | 0.9059 | 0.0941 | 0.1059 | 3997 | 947  | 56  | 4103 | 853  | 44  | 5.94   | 14.64  |
| 5000 | 0.97 | 0.9  | 0.1  | 3929 | 900  | 50  | 0.04 | 0.8941 | 0.9059 | 0.0941 | 0.1059 | 3997 | 947  | 56  | 4103 | 853  | 44  | 4.14   | 10.80  |
| 5000 | 0.98 | 0.9  | 0.1  | 3969 | 900  | 50  | 0.02 | 0.8941 | 0.9059 | 0.0941 | 0.1059 | 3997 | 947  | 56  | 4103 | 853  | 44  | 3.16   | 7.75   |
| 5000 | 0.99 | 0.9  | 0.1  | 4010 | 900  | 50  | 0.00 | 0.8941 | 0.9059 | 0.0941 | 0.1059 | 3997 | 947  | 56  | 4103 | 853  | 44  | 2.99   | 5.50   |
| 5000 | 1.00 | 0.9  | 0.1  | 4050 | 900  | 50  | 0.00 | 0.8941 | 0.9059 | 0.0941 | 0.1059 | 3997 | 947  | 56  | 4103 | 853  | 44  | 3.65   | 4.06   |
| 5000 | 1.01 | 0.9  | 0.1  | 4091 | 900  | 50  | 0.00 | 0.8941 | 0.9059 | 0.0941 | 0.1059 | 3997 | 947  | 56  | 4103 | 853  | 44  | 5.13   | 3.41   |
| 5000 | 1.02 | 0.9  | 0.1  | 4131 | 900  | 50  | 0.02 | 0.8941 | 0.9059 | 0.0941 | 0.1059 | 3997 | 947  | 56  | 4103 | 853  | 44  | 7.43   | 3.56   |
| 5000 | 1.03 | 0.9  | 0.1  | 4172 | 900  | 50  | 0.04 | 0.8941 | 0.9059 | 0.0941 | 0.1059 | 3997 | 947  | 56  | 4103 | 853  | 44  | 10.55  | 4.51   |
| 5000 | 1.04 | 0.9  | 0.1  | 4212 | 900  | 50  | 0.06 | 0.8941 | 0.9059 | 0.0941 | 0.1059 | 3997 | 947  | 56  | 4103 | 853  | 44  | 14.49  | 6.26   |
| 5000 | 1.05 | 0.9  | 0.1  | 4253 | 900  | 50  | 0.10 | 0.8941 | 0.9059 | 0.0941 | 0.1059 | 3997 | 947  | 56  | 4103 | 853  | 44  | 19.26  | 8.81   |
| 5000 | 1.06 | 0.9  | 0.1  | 4293 | 900  | 50  | 0.14 | 0.8941 | 0.9059 | 0.0941 | 0.1059 | 3997 | 947  | 56  | 4103 | 853  | 44  | 24.84  | 12.16  |
| 5000 | 1.07 | 0.9  | 0.1  | 4334 | 900  | 50  | 0.19 | 0.8941 | 0.9059 | 0.0941 | 0.1059 | 3997 | 947  | 56  | 4103 | 853  | 44  | 31.24  | 16.31  |
| 5000 | 1.08 | 0.9  | 0.1  | 4374 | 900  | 50  | 0.24 | 0.8941 | 0.9059 | 0.0941 | 0.1059 | 3997 | 947  | 56  | 4103 | 853  | 44  | 38.47  | 21.26  |
| 5000 | 1.09 | 0.9  | 0.1  | 4415 | 900  | 50  | 0.30 | 0.8941 | 0.9059 | 0.0941 | 0.1059 | 3997 | 947  | 56  | 4103 | 853  | 44  | 46.51  | 27.00  |

|      |      |      |      |      |     |    |      |        |        |        |        |      |     |    |      |     |    |        |        |
|------|------|------|------|------|-----|----|------|--------|--------|--------|--------|------|-----|----|------|-----|----|--------|--------|
| 5000 | 1.10 | 0.9  | 0.1  | 4455 | 900 | 50 | 0.37 | 0.8941 | 0.9059 | 0.0941 | 0.1059 | 3997 | 947 | 56 | 4103 | 853 | 44 | 55.38  | 33.55  |
| 5000 | 1.11 | 0.9  | 0.1  | 4496 | 900 | 50 | 0.44 | 0.8941 | 0.9059 | 0.0941 | 0.1059 | 3997 | 947 | 56 | 4103 | 853 | 44 | 65.06  | 40.90  |
| 5000 | 1.12 | 0.9  | 0.1  | 4536 | 900 | 50 | 0.52 | 0.8941 | 0.9059 | 0.0941 | 0.1059 | 3997 | 947 | 56 | 4103 | 853 | 44 | 75.57  | 49.04  |
| 5000 | 1.13 | 0.9  | 0.1  | 4577 | 900 | 50 | 0.61 | 0.8941 | 0.9059 | 0.0941 | 0.1059 | 3997 | 947 | 56 | 4103 | 853 | 44 | 86.90  | 57.99  |
| 5000 | 1.14 | 0.9  | 0.1  | 4617 | 900 | 50 | 0.70 | 0.8941 | 0.9059 | 0.0941 | 0.1059 | 3997 | 947 | 56 | 4103 | 853 | 44 | 99.04  | 67.74  |
| 5000 | 1.15 | 0.9  | 0.1  | 4658 | 900 | 50 | 0.79 | 0.8941 | 0.9059 | 0.0941 | 0.1059 | 3997 | 947 | 56 | 4103 | 853 | 44 | 112.01 | 78.28  |
| 5000 | 1.16 | 0.9  | 0.1  | 4698 | 900 | 50 | 0.89 | 0.8941 | 0.9059 | 0.0941 | 0.1059 | 3997 | 947 | 56 | 4103 | 853 | 44 | 125.80 | 89.62  |
| 5000 | 1.17 | 0.9  | 0.1  | 4739 | 900 | 50 | 1.00 | 0.8941 | 0.9059 | 0.0941 | 0.1059 | 3997 | 947 | 56 | 4103 | 853 | 44 | 140.41 | 101.77 |
| 5000 | 1.18 | 0.9  | 0.1  | 4779 | 900 | 50 | 1.11 | 0.8941 | 0.9059 | 0.0941 | 0.1059 | 3997 | 947 | 56 | 4103 | 853 | 44 | 155.84 | 114.71 |
| 5000 | 1.19 | 0.9  | 0.1  | 4820 | 900 | 50 | 1.23 | 0.8941 | 0.9059 | 0.0941 | 0.1059 | 3997 | 947 | 56 | 4103 | 853 | 44 | 172.10 | 128.45 |
| 5000 | 1.20 | 0.9  | 0.1  | 4860 | 900 | 50 | 1.35 | 0.8941 | 0.9059 | 0.0941 | 0.1059 | 3997 | 947 | 56 | 4103 | 853 | 44 | 189.17 | 143.00 |
| 5000 | 0.80 | 0.95 | 0.05 | 3610 | 475 | 13 | 0.56 | 0.9457 | 0.9543 | 0.0457 | 0.0543 | 4472 | 513 | 15 | 4553 | 436 | 10 | 169.35 | 199.19 |
| 5000 | 0.81 | 0.95 | 0.05 | 3655 | 475 | 13 | 0.50 | 0.9457 | 0.9543 | 0.0457 | 0.0543 | 4472 | 513 | 15 | 4553 | 436 | 10 | 152.41 | 180.95 |
| 5000 | 0.82 | 0.95 | 0.05 | 3700 | 475 | 13 | 0.45 | 0.9457 | 0.9543 | 0.0457 | 0.0543 | 4472 | 513 | 15 | 4553 | 436 | 10 | 136.38 | 163.59 |
| 5000 | 0.83 | 0.95 | 0.05 | 3745 | 475 | 13 | 0.39 | 0.9457 | 0.9543 | 0.0457 | 0.0543 | 4472 | 513 | 15 | 4553 | 436 | 10 | 121.26 | 147.13 |
| 5000 | 0.84 | 0.95 | 0.05 | 3791 | 475 | 13 | 0.34 | 0.9457 | 0.9543 | 0.0457 | 0.0543 | 4472 | 513 | 15 | 4553 | 436 | 10 | 107.05 | 131.57 |
| 5000 | 0.85 | 0.95 | 0.05 | 3836 | 475 | 13 | 0.30 | 0.9457 | 0.9543 | 0.0457 | 0.0543 | 4472 | 513 | 15 | 4553 | 436 | 10 | 93.75  | 116.90 |
| 5000 | 0.86 | 0.95 | 0.05 | 3881 | 475 | 13 | 0.26 | 0.9457 | 0.9543 | 0.0457 | 0.0543 | 4472 | 513 | 15 | 4553 | 436 | 10 | 81.36  | 103.12 |
| 5000 | 0.87 | 0.95 | 0.05 | 3926 | 475 | 13 | 0.22 | 0.9457 | 0.9543 | 0.0457 | 0.0543 | 4472 | 513 | 15 | 4553 | 436 | 10 | 69.88  | 90.24  |
| 5000 | 0.88 | 0.95 | 0.05 | 3971 | 475 | 13 | 0.18 | 0.9457 | 0.9543 | 0.0457 | 0.0543 | 4472 | 513 | 15 | 4553 | 436 | 10 | 59.32  | 78.26  |
| 5000 | 0.89 | 0.95 | 0.05 | 4016 | 475 | 13 | 0.15 | 0.9457 | 0.9543 | 0.0457 | 0.0543 | 4472 | 513 | 15 | 4553 | 436 | 10 | 49.66  | 67.16  |
| 5000 | 0.90 | 0.95 | 0.05 | 4061 | 475 | 13 | 0.13 | 0.9457 | 0.9543 | 0.0457 | 0.0543 | 4472 | 513 | 15 | 4553 | 436 | 10 | 40.92  | 56.97  |
| 5000 | 0.91 | 0.95 | 0.05 | 4106 | 475 | 13 | 0.10 | 0.9457 | 0.9543 | 0.0457 | 0.0543 | 4472 | 513 | 15 | 4553 | 436 | 10 | 33.08  | 47.66  |
| 5000 | 0.92 | 0.95 | 0.05 | 4152 | 475 | 13 | 0.08 | 0.9457 | 0.9543 | 0.0457 | 0.0543 | 4472 | 513 | 15 | 4553 | 436 | 10 | 26.16  | 39.25  |
| 5000 | 0.93 | 0.95 | 0.05 | 4197 | 475 | 13 | 0.06 | 0.9457 | 0.9543 | 0.0457 | 0.0543 | 4472 | 513 | 15 | 4553 | 436 | 10 | 20.15  | 31.74  |
| 5000 | 0.94 | 0.95 | 0.05 | 4242 | 475 | 13 | 0.04 | 0.9457 | 0.9543 | 0.0457 | 0.0543 | 4472 | 513 | 15 | 4553 | 436 | 10 | 15.05  | 25.12  |
| 5000 | 0.95 | 0.95 | 0.05 | 4287 | 475 | 13 | 0.03 | 0.9457 | 0.9543 | 0.0457 | 0.0543 | 4472 | 513 | 15 | 4553 | 436 | 10 | 10.85  | 19.39  |
| 5000 | 0.96 | 0.95 | 0.05 | 4332 | 475 | 13 | 0.02 | 0.9457 | 0.9543 | 0.0457 | 0.0543 | 4472 | 513 | 15 | 4553 | 436 | 10 | 7.57   | 14.56  |
| 5000 | 0.97 | 0.95 | 0.05 | 4377 | 475 | 13 | 0.01 | 0.9457 | 0.9543 | 0.0457 | 0.0543 | 4472 | 513 | 15 | 4553 | 436 | 10 | 5.20   | 10.63  |
| 5000 | 0.98 | 0.95 | 0.05 | 4422 | 475 | 13 | 0.00 | 0.9457 | 0.9543 | 0.0457 | 0.0543 | 4472 | 513 | 15 | 4553 | 436 | 10 | 3.74   | 7.58   |
| 5000 | 0.99 | 0.95 | 0.05 | 4467 | 475 | 13 | 0.00 | 0.9457 | 0.9543 | 0.0457 | 0.0543 | 4472 | 513 | 15 | 4553 | 436 | 10 | 3.19   | 5.44   |
| 5000 | 1.00 | 0.95 | 0.05 | 4513 | 475 | 13 | 0.00 | 0.9457 | 0.9543 | 0.0457 | 0.0543 | 4472 | 513 | 15 | 4553 | 436 | 10 | 3.56   | 4.18   |
| 5000 | 1.01 | 0.95 | 0.05 | 4558 | 475 | 13 | 0.00 | 0.9457 | 0.9543 | 0.0457 | 0.0543 | 4472 | 513 | 15 | 4553 | 436 | 10 | 4.83   | 3.82   |
| 5000 | 1.02 | 0.95 | 0.05 | 4603 | 475 | 13 | 0.00 | 0.9457 | 0.9543 | 0.0457 | 0.0543 | 4472 | 513 | 15 | 4553 | 436 | 10 | 7.01   | 4.36   |
| 5000 | 1.03 | 0.95 | 0.05 | 4648 | 475 | 13 | 0.01 | 0.9457 | 0.9543 | 0.0457 | 0.0543 | 4472 | 513 | 15 | 4553 | 436 | 10 | 10.11  | 5.79   |

|      |      |      |      |      |     |    |      |        |        |        |        |      |     |    |      |     |    |        |        |
|------|------|------|------|------|-----|----|------|--------|--------|--------|--------|------|-----|----|------|-----|----|--------|--------|
| 5000 | 1.04 | 0.95 | 0.05 | 4693 | 475 | 13 | 0.02 | 0.9457 | 0.9543 | 0.0457 | 0.0543 | 4472 | 513 | 15 | 4553 | 436 | 10 | 14.11  | 8.11   |
| 5000 | 1.05 | 0.95 | 0.05 | 4738 | 475 | 13 | 0.03 | 0.9457 | 0.9543 | 0.0457 | 0.0543 | 4472 | 513 | 15 | 4553 | 436 | 10 | 19.02  | 11.33  |
| 5000 | 1.06 | 0.95 | 0.05 | 4783 | 475 | 13 | 0.04 | 0.9457 | 0.9543 | 0.0457 | 0.0543 | 4472 | 513 | 15 | 4553 | 436 | 10 | 24.85  | 15.45  |
| 5000 | 1.07 | 0.95 | 0.05 | 4828 | 475 | 13 | 0.05 | 0.9457 | 0.9543 | 0.0457 | 0.0543 | 4472 | 513 | 15 | 4553 | 436 | 10 | 31.59  | 20.45  |
| 5000 | 1.08 | 0.95 | 0.05 | 4874 | 475 | 13 | 0.07 | 0.9457 | 0.9543 | 0.0457 | 0.0543 | 4472 | 513 | 15 | 4553 | 436 | 10 | 39.23  | 26.36  |
| 5000 | 1.09 | 0.95 | 0.05 | 4919 | 475 | 13 | 0.08 | 0.9457 | 0.9543 | 0.0457 | 0.0543 | 4472 | 513 | 15 | 4553 | 436 | 10 | 47.79  | 33.15  |
| 5000 | 1.10 | 0.95 | 0.05 | 4964 | 475 | 13 | 0.10 | 0.9457 | 0.9543 | 0.0457 | 0.0543 | 4472 | 513 | 15 | 4553 | 436 | 10 | 57.26  | 40.84  |
| 5000 | 1.11 | 0.95 | 0.05 | 5009 | 475 | 13 | 0.12 | 0.9457 | 0.9543 | 0.0457 | 0.0543 | 4472 | 513 | 15 | 4553 | 436 | 10 | 67.64  | 49.43  |
| 5000 | 1.12 | 0.95 | 0.05 | 5054 | 475 | 13 | 0.15 | 0.9457 | 0.9543 | 0.0457 | 0.0543 | 4472 | 513 | 15 | 4553 | 436 | 10 | 78.93  | 58.91  |
| 5000 | 1.13 | 0.95 | 0.05 | 5099 | 475 | 13 | 0.17 | 0.9457 | 0.9543 | 0.0457 | 0.0543 | 4472 | 513 | 15 | 4553 | 436 | 10 | 91.13  | 69.28  |
| 5000 | 1.14 | 0.95 | 0.05 | 5144 | 475 | 13 | 0.19 | 0.9457 | 0.9543 | 0.0457 | 0.0543 | 4472 | 513 | 15 | 4553 | 436 | 10 | 104.24 | 80.55  |
| 5000 | 1.15 | 0.95 | 0.05 | 5189 | 475 | 13 | 0.22 | 0.9457 | 0.9543 | 0.0457 | 0.0543 | 4472 | 513 | 15 | 4553 | 436 | 10 | 118.26 | 92.71  |
| 5000 | 1.16 | 0.95 | 0.05 | 5235 | 475 | 13 | 0.25 | 0.9457 | 0.9543 | 0.0457 | 0.0543 | 4472 | 513 | 15 | 4553 | 436 | 10 | 133.20 | 105.77 |
| 5000 | 1.17 | 0.95 | 0.05 | 5280 | 475 | 13 | 0.28 | 0.9457 | 0.9543 | 0.0457 | 0.0543 | 4472 | 513 | 15 | 4553 | 436 | 10 | 149.04 | 119.72 |
| 5000 | 1.18 | 0.95 | 0.05 | 5325 | 475 | 13 | 0.31 | 0.9457 | 0.9543 | 0.0457 | 0.0543 | 4472 | 513 | 15 | 4553 | 436 | 10 | 165.79 | 134.57 |
| 5000 | 1.19 | 0.95 | 0.05 | 5370 | 475 | 13 | 0.34 | 0.9457 | 0.9543 | 0.0457 | 0.0543 | 4472 | 513 | 15 | 4553 | 436 | 10 | 183.46 | 150.31 |
| 5000 | 1.20 | 0.95 | 0.05 | 5415 | 475 | 13 | 0.38 | 0.9457 | 0.9543 | 0.0457 | 0.0543 | 4472 | 513 | 15 | 4553 | 436 | 10 | 202.03 | 166.95 |
| 5000 | 0.80 | 1    | 0    | 4000 | 0   | 0  | 0.38 | 1.0000 | 1.0000 | 0.0000 | 0.0000 | 5000 | 0   | 0  | 5000 | 0   | 0  | .      | .      |
| 5000 | 0.81 | 1    | 0    | 4050 | 0   | 0  | 0.38 | 1.0000 | 1.0000 | 0.0000 | 0.0000 | 5000 | 0   | 0  | 5000 | 0   | 0  | .      | .      |
| 5000 | 0.82 | 1    | 0    | 4100 | 0   | 0  | 0.38 | 1.0000 | 1.0000 | 0.0000 | 0.0000 | 5000 | 0   | 0  | 5000 | 0   | 0  | .      | .      |
| 5000 | 0.83 | 1    | 0    | 4150 | 0   | 0  | 0.38 | 1.0000 | 1.0000 | 0.0000 | 0.0000 | 5000 | 0   | 0  | 5000 | 0   | 0  | .      | .      |
| 5000 | 0.84 | 1    | 0    | 4200 | 0   | 0  | 0.38 | 1.0000 | 1.0000 | 0.0000 | 0.0000 | 5000 | 0   | 0  | 5000 | 0   | 0  | .      | .      |
| 5000 | 0.85 | 1    | 0    | 4250 | 0   | 0  | 0.38 | 1.0000 | 1.0000 | 0.0000 | 0.0000 | 5000 | 0   | 0  | 5000 | 0   | 0  | .      | .      |
| 5000 | 0.86 | 1    | 0    | 4300 | 0   | 0  | 0.38 | 1.0000 | 1.0000 | 0.0000 | 0.0000 | 5000 | 0   | 0  | 5000 | 0   | 0  | .      | .      |
| 5000 | 0.87 | 1    | 0    | 4350 | 0   | 0  | 0.38 | 1.0000 | 1.0000 | 0.0000 | 0.0000 | 5000 | 0   | 0  | 5000 | 0   | 0  | .      | .      |
| 5000 | 0.88 | 1    | 0    | 4400 | 0   | 0  | 0.38 | 1.0000 | 1.0000 | 0.0000 | 0.0000 | 5000 | 0   | 0  | 5000 | 0   | 0  | .      | .      |
| 5000 | 0.89 | 1    | 0    | 4450 | 0   | 0  | 0.38 | 1.0000 | 1.0000 | 0.0000 | 0.0000 | 5000 | 0   | 0  | 5000 | 0   | 0  | .      | .      |
| 5000 | 0.90 | 1    | 0    | 4500 | 0   | 0  | 0.38 | 1.0000 | 1.0000 | 0.0000 | 0.0000 | 5000 | 0   | 0  | 5000 | 0   | 0  | .      | .      |
| 5000 | 0.91 | 1    | 0    | 4550 | 0   | 0  | 0.38 | 1.0000 | 1.0000 | 0.0000 | 0.0000 | 5000 | 0   | 0  | 5000 | 0   | 0  | .      | .      |
| 5000 | 0.92 | 1    | 0    | 4600 | 0   | 0  | 0.38 | 1.0000 | 1.0000 | 0.0000 | 0.0000 | 5000 | 0   | 0  | 5000 | 0   | 0  | .      | .      |
| 5000 | 0.93 | 1    | 0    | 4650 | 0   | 0  | 0.38 | 1.0000 | 1.0000 | 0.0000 | 0.0000 | 5000 | 0   | 0  | 5000 | 0   | 0  | .      | .      |
| 5000 | 0.94 | 1    | 0    | 4700 | 0   | 0  | 0.38 | 1.0000 | 1.0000 | 0.0000 | 0.0000 | 5000 | 0   | 0  | 5000 | 0   | 0  | .      | .      |
| 5000 | 0.95 | 1    | 0    | 4750 | 0   | 0  | 0.38 | 1.0000 | 1.0000 | 0.0000 | 0.0000 | 5000 | 0   | 0  | 5000 | 0   | 0  | .      | .      |
| 5000 | 0.96 | 1    | 0    | 4800 | 0   | 0  | 0.38 | 1.0000 | 1.0000 | 0.0000 | 0.0000 | 5000 | 0   | 0  | 5000 | 0   | 0  | .      | .      |
| 5000 | 0.97 | 1    | 0    | 4850 | 0   | 0  | 0.38 | 1.0000 | 1.0000 | 0.0000 | 0.0000 | 5000 | 0   | 0  | 5000 | 0   | 0  | .      | .      |

|       |      |      |      |      |     |      |      |        |        |        |        |      |     |      |      |      |      |      |      |
|-------|------|------|------|------|-----|------|------|--------|--------|--------|--------|------|-----|------|------|------|------|------|------|
| 5000  | 0.98 | 1    | 0    | 4900 | 0   | 0    | 0.38 | 1.0000 | 1.0000 | 0.0000 | 0.0000 | 5000 | 0   | 0    | 5000 | 0    | 0    | .    | .    |
| 5000  | 0.99 | 1    | 0    | 4950 | 0   | 0    | 0.38 | 1.0000 | 1.0000 | 0.0000 | 0.0000 | 5000 | 0   | 0    | 5000 | 0    | 0    | .    | .    |
| 5000  | 1.00 | 1    | 0    | 5000 | 0   | 0    | 0.38 | 1.0000 | 1.0000 | 0.0000 | 0.0000 | 5000 | 0   | 0    | 5000 | 0    | 0    | .    | .    |
| 5000  | 1.01 | 1    | 0    | 5050 | 0   | 0    | 0.38 | 1.0000 | 1.0000 | 0.0000 | 0.0000 | 5000 | 0   | 0    | 5000 | 0    | 0    | .    | .    |
| 5000  | 1.02 | 1    | 0    | 5100 | 0   | 0    | 0.38 | 1.0000 | 1.0000 | 0.0000 | 0.0000 | 5000 | 0   | 0    | 5000 | 0    | 0    | .    | .    |
| 5000  | 1.03 | 1    | 0    | 5150 | 0   | 0    | 0.38 | 1.0000 | 1.0000 | 0.0000 | 0.0000 | 5000 | 0   | 0    | 5000 | 0    | 0    | .    | .    |
| 5000  | 1.04 | 1    | 0    | 5200 | 0   | 0    | 0.38 | 1.0000 | 1.0000 | 0.0000 | 0.0000 | 5000 | 0   | 0    | 5000 | 0    | 0    | .    | .    |
| 5000  | 1.05 | 1    | 0    | 5250 | 0   | 0    | 0.38 | 1.0000 | 1.0000 | 0.0000 | 0.0000 | 5000 | 0   | 0    | 5000 | 0    | 0    | .    | .    |
| 5000  | 1.06 | 1    | 0    | 5300 | 0   | 0    | 0.38 | 1.0000 | 1.0000 | 0.0000 | 0.0000 | 5000 | 0   | 0    | 5000 | 0    | 0    | .    | .    |
| 5000  | 1.07 | 1    | 0    | 5350 | 0   | 0    | 0.38 | 1.0000 | 1.0000 | 0.0000 | 0.0000 | 5000 | 0   | 0    | 5000 | 0    | 0    | .    | .    |
| 5000  | 1.08 | 1    | 0    | 5400 | 0   | 0    | 0.38 | 1.0000 | 1.0000 | 0.0000 | 0.0000 | 5000 | 0   | 0    | 5000 | 0    | 0    | .    | .    |
| 5000  | 1.09 | 1    | 0    | 5450 | 0   | 0    | 0.38 | 1.0000 | 1.0000 | 0.0000 | 0.0000 | 5000 | 0   | 0    | 5000 | 0    | 0    | .    | .    |
| 5000  | 1.10 | 1    | 0    | 5500 | 0   | 0    | 0.38 | 1.0000 | 1.0000 | 0.0000 | 0.0000 | 5000 | 0   | 0    | 5000 | 0    | 0    | .    | .    |
| 5000  | 1.11 | 1    | 0    | 5550 | 0   | 0    | 0.38 | 1.0000 | 1.0000 | 0.0000 | 0.0000 | 5000 | 0   | 0    | 5000 | 0    | 0    | .    | .    |
| 5000  | 1.12 | 1    | 0    | 5600 | 0   | 0    | 0.38 | 1.0000 | 1.0000 | 0.0000 | 0.0000 | 5000 | 0   | 0    | 5000 | 0    | 0    | .    | .    |
| 5000  | 1.13 | 1    | 0    | 5650 | 0   | 0    | 0.38 | 1.0000 | 1.0000 | 0.0000 | 0.0000 | 5000 | 0   | 0    | 5000 | 0    | 0    | .    | .    |
| 5000  | 1.14 | 1    | 0    | 5700 | 0   | 0    | 0.38 | 1.0000 | 1.0000 | 0.0000 | 0.0000 | 5000 | 0   | 0    | 5000 | 0    | 0    | .    | .    |
| 5000  | 1.15 | 1    | 0    | 5750 | 0   | 0    | 0.38 | 1.0000 | 1.0000 | 0.0000 | 0.0000 | 5000 | 0   | 0    | 5000 | 0    | 0    | .    | .    |
| 5000  | 1.16 | 1    | 0    | 5800 | 0   | 0    | 0.38 | 1.0000 | 1.0000 | 0.0000 | 0.0000 | 5000 | 0   | 0    | 5000 | 0    | 0    | .    | .    |
| 5000  | 1.17 | 1    | 0    | 5850 | 0   | 0    | 0.38 | 1.0000 | 1.0000 | 0.0000 | 0.0000 | 5000 | 0   | 0    | 5000 | 0    | 0    | .    | .    |
| 5000  | 1.18 | 1    | 0    | 5900 | 0   | 0    | 0.38 | 1.0000 | 1.0000 | 0.0000 | 0.0000 | 5000 | 0   | 0    | 5000 | 0    | 0    | .    | .    |
| 5000  | 1.19 | 1    | 0    | 5950 | 0   | 0    | 0.38 | 1.0000 | 1.0000 | 0.0000 | 0.0000 | 5000 | 0   | 0    | 5000 | 0    | 0    | .    | .    |
| 5000  | 1.20 | 1    | 0    | 6000 | 0   | 0    | 0.38 | 1.0000 | 1.0000 | 0.0000 | 0.0000 | 5000 | 0   | 0    | 5000 | 0    | 0    | .    | .    |
| 10000 | 0.80 | 0.05 | 0.95 | 20   | 950 | 9025 | 0.92 | 0.0470 | 0.0530 | 0.9470 | 0.9530 | 22   | 895 | 9082 | 28   | 1004 | 8968 | 3.88 | 5.63 |
| 10000 | 0.81 | 0.05 | 0.95 | 20   | 950 | 9025 | 0.83 | 0.0470 | 0.0530 | 0.9470 | 0.9530 | 22   | 895 | 9082 | 28   | 1004 | 8968 | 3.84 | 5.49 |
| 10000 | 0.82 | 0.05 | 0.95 | 21   | 950 | 9025 | 0.74 | 0.0470 | 0.0530 | 0.9470 | 0.9530 | 22   | 895 | 9082 | 28   | 1004 | 8968 | 3.80 | 5.35 |
| 10000 | 0.83 | 0.05 | 0.95 | 21   | 950 | 9025 | 0.66 | 0.0470 | 0.0530 | 0.9470 | 0.9530 | 22   | 895 | 9082 | 28   | 1004 | 8968 | 3.77 | 5.22 |
| 10000 | 0.84 | 0.05 | 0.95 | 21   | 950 | 9025 | 0.59 | 0.0470 | 0.0530 | 0.9470 | 0.9530 | 22   | 895 | 9082 | 28   | 1004 | 8968 | 3.74 | 5.09 |
| 10000 | 0.85 | 0.05 | 0.95 | 21   | 950 | 9025 | 0.52 | 0.0470 | 0.0530 | 0.9470 | 0.9530 | 22   | 895 | 9082 | 28   | 1004 | 8968 | 3.72 | 4.97 |
| 10000 | 0.86 | 0.05 | 0.95 | 22   | 950 | 9025 | 0.45 | 0.0470 | 0.0530 | 0.9470 | 0.9530 | 22   | 895 | 9082 | 28   | 1004 | 8968 | 3.70 | 4.85 |
| 10000 | 0.87 | 0.05 | 0.95 | 22   | 950 | 9025 | 0.39 | 0.0470 | 0.0530 | 0.9470 | 0.9530 | 22   | 895 | 9082 | 28   | 1004 | 8968 | 3.69 | 4.73 |
| 10000 | 0.88 | 0.05 | 0.95 | 22   | 950 | 9025 | 0.33 | 0.0470 | 0.0530 | 0.9470 | 0.9530 | 22   | 895 | 9082 | 28   | 1004 | 8968 | 3.69 | 4.62 |
| 10000 | 0.89 | 0.05 | 0.95 | 22   | 950 | 9025 | 0.28 | 0.0470 | 0.0530 | 0.9470 | 0.9530 | 22   | 895 | 9082 | 28   | 1004 | 8968 | 3.69 | 4.51 |
| 10000 | 0.90 | 0.05 | 0.95 | 23   | 950 | 9025 | 0.23 | 0.0470 | 0.0530 | 0.9470 | 0.9530 | 22   | 895 | 9082 | 28   | 1004 | 8968 | 3.70 | 4.41 |
| 10000 | 0.91 | 0.05 | 0.95 | 23   | 950 | 9025 | 0.18 | 0.0470 | 0.0530 | 0.9470 | 0.9530 | 22   | 895 | 9082 | 28   | 1004 | 8968 | 3.71 | 4.31 |



|       |      |      |      |    |      |      |      |        |        |        |        |    |      |      |     |      |      |      |       |
|-------|------|------|------|----|------|------|------|--------|--------|--------|--------|----|------|------|-----|------|------|------|-------|
| 10000 | 0.92 | 0.05 | 0.95 | 23 | 950  | 9025 | 0.15 | 0.0470 | 0.0530 | 0.9470 | 0.9530 | 22 | 895  | 9082 | 28  | 1004 | 8968 | 3.73 | 4.22  |
| 10000 | 0.93 | 0.05 | 0.95 | 23 | 950  | 9025 | 0.11 | 0.0470 | 0.0530 | 0.9470 | 0.9530 | 22 | 895  | 9082 | 28  | 1004 | 8968 | 3.75 | 4.13  |
| 10000 | 0.94 | 0.05 | 0.95 | 24 | 950  | 9025 | 0.08 | 0.0470 | 0.0530 | 0.9470 | 0.9530 | 22 | 895  | 9082 | 28  | 1004 | 8968 | 3.78 | 4.05  |
| 10000 | 0.95 | 0.05 | 0.95 | 24 | 950  | 9025 | 0.06 | 0.0470 | 0.0530 | 0.9470 | 0.9530 | 22 | 895  | 9082 | 28  | 1004 | 8968 | 3.82 | 3.97  |
| 10000 | 0.96 | 0.05 | 0.95 | 24 | 950  | 9025 | 0.04 | 0.0470 | 0.0530 | 0.9470 | 0.9530 | 22 | 895  | 9082 | 28  | 1004 | 8968 | 3.86 | 3.89  |
| 10000 | 0.97 | 0.05 | 0.95 | 24 | 950  | 9025 | 0.02 | 0.0470 | 0.0530 | 0.9470 | 0.9530 | 22 | 895  | 9082 | 28  | 1004 | 8968 | 3.90 | 3.82  |
| 10000 | 0.98 | 0.05 | 0.95 | 25 | 950  | 9025 | 0.01 | 0.0470 | 0.0530 | 0.9470 | 0.9530 | 22 | 895  | 9082 | 28  | 1004 | 8968 | 3.95 | 3.75  |
| 10000 | 0.99 | 0.05 | 0.95 | 25 | 950  | 9025 | 0.00 | 0.0470 | 0.0530 | 0.9470 | 0.9530 | 22 | 895  | 9082 | 28  | 1004 | 8968 | 4.01 | 3.69  |
| 10000 | 1.00 | 0.05 | 0.95 | 25 | 950  | 9025 | 0.00 | 0.0470 | 0.0530 | 0.9470 | 0.9530 | 22 | 895  | 9082 | 28  | 1004 | 8968 | 4.08 | 3.63  |
| 10000 | 1.01 | 0.05 | 0.95 | 25 | 950  | 9025 | 0.00 | 0.0470 | 0.0530 | 0.9470 | 0.9530 | 22 | 895  | 9082 | 28  | 1004 | 8968 | 4.15 | 3.58  |
| 10000 | 1.02 | 0.05 | 0.95 | 26 | 950  | 9025 | 0.01 | 0.0470 | 0.0530 | 0.9470 | 0.9530 | 22 | 895  | 9082 | 28  | 1004 | 8968 | 4.22 | 3.53  |
| 10000 | 1.03 | 0.05 | 0.95 | 26 | 950  | 9025 | 0.02 | 0.0470 | 0.0530 | 0.9470 | 0.9530 | 22 | 895  | 9082 | 28  | 1004 | 8968 | 4.30 | 3.49  |
| 10000 | 1.04 | 0.05 | 0.95 | 26 | 950  | 9025 | 0.04 | 0.0470 | 0.0530 | 0.9470 | 0.9530 | 22 | 895  | 9082 | 28  | 1004 | 8968 | 4.39 | 3.45  |
| 10000 | 1.05 | 0.05 | 0.95 | 26 | 950  | 9025 | 0.06 | 0.0470 | 0.0530 | 0.9470 | 0.9530 | 22 | 895  | 9082 | 28  | 1004 | 8968 | 4.48 | 3.41  |
| 10000 | 1.06 | 0.05 | 0.95 | 27 | 950  | 9025 | 0.08 | 0.0470 | 0.0530 | 0.9470 | 0.9530 | 22 | 895  | 9082 | 28  | 1004 | 8968 | 4.58 | 3.38  |
| 10000 | 1.07 | 0.05 | 0.95 | 27 | 950  | 9025 | 0.11 | 0.0470 | 0.0530 | 0.9470 | 0.9530 | 22 | 895  | 9082 | 28  | 1004 | 8968 | 4.68 | 3.36  |
| 10000 | 1.08 | 0.05 | 0.95 | 27 | 950  | 9025 | 0.14 | 0.0470 | 0.0530 | 0.9470 | 0.9530 | 22 | 895  | 9082 | 28  | 1004 | 8968 | 4.79 | 3.33  |
| 10000 | 1.09 | 0.05 | 0.95 | 27 | 950  | 9025 | 0.18 | 0.0470 | 0.0530 | 0.9470 | 0.9530 | 22 | 895  | 9082 | 28  | 1004 | 8968 | 4.90 | 3.32  |
| 10000 | 1.10 | 0.05 | 0.95 | 28 | 950  | 9025 | 0.22 | 0.0470 | 0.0530 | 0.9470 | 0.9530 | 22 | 895  | 9082 | 28  | 1004 | 8968 | 5.02 | 3.30  |
| 10000 | 1.11 | 0.05 | 0.95 | 28 | 950  | 9025 | 0.27 | 0.0470 | 0.0530 | 0.9470 | 0.9530 | 22 | 895  | 9082 | 28  | 1004 | 8968 | 5.15 | 3.29  |
| 10000 | 1.12 | 0.05 | 0.95 | 28 | 950  | 9025 | 0.32 | 0.0470 | 0.0530 | 0.9470 | 0.9530 | 22 | 895  | 9082 | 28  | 1004 | 8968 | 5.28 | 3.29  |
| 10000 | 1.13 | 0.05 | 0.95 | 28 | 950  | 9025 | 0.38 | 0.0470 | 0.0530 | 0.9470 | 0.9530 | 22 | 895  | 9082 | 28  | 1004 | 8968 | 5.42 | 3.29  |
| 10000 | 1.14 | 0.05 | 0.95 | 29 | 950  | 9025 | 0.44 | 0.0470 | 0.0530 | 0.9470 | 0.9530 | 22 | 895  | 9082 | 28  | 1004 | 8968 | 5.56 | 3.30  |
| 10000 | 1.15 | 0.05 | 0.95 | 29 | 950  | 9025 | 0.50 | 0.0470 | 0.0530 | 0.9470 | 0.9530 | 22 | 895  | 9082 | 28  | 1004 | 8968 | 5.71 | 3.30  |
| 10000 | 1.16 | 0.05 | 0.95 | 29 | 950  | 9025 | 0.57 | 0.0470 | 0.0530 | 0.9470 | 0.9530 | 22 | 895  | 9082 | 28  | 1004 | 8968 | 5.86 | 3.32  |
| 10000 | 1.17 | 0.05 | 0.95 | 29 | 950  | 9025 | 0.64 | 0.0470 | 0.0530 | 0.9470 | 0.9530 | 22 | 895  | 9082 | 28  | 1004 | 8968 | 6.02 | 3.34  |
| 10000 | 1.18 | 0.05 | 0.95 | 30 | 950  | 9025 | 0.72 | 0.0470 | 0.0530 | 0.9470 | 0.9530 | 22 | 895  | 9082 | 28  | 1004 | 8968 | 6.19 | 3.36  |
| 10000 | 1.19 | 0.05 | 0.95 | 30 | 950  | 9025 | 0.80 | 0.0470 | 0.0530 | 0.9470 | 0.9530 | 22 | 895  | 9082 | 28  | 1004 | 8968 | 6.36 | 3.39  |
| 10000 | 1.20 | 0.05 | 0.95 | 30 | 950  | 9025 | 0.89 | 0.0470 | 0.0530 | 0.9470 | 0.9530 | 22 | 895  | 9082 | 28  | 1004 | 8968 | 6.54 | 3.42  |
| 10000 | 0.80 | 0.1  | 0.9  | 80 | 1800 | 8100 | 3.37 | 0.0958 | 0.1042 | 0.8958 | 0.9042 | 92 | 1733 | 8175 | 108 | 1866 | 8025 | 4.80 | 10.52 |
| 10000 | 0.81 | 0.1  | 0.9  | 81 | 1800 | 8100 | 3.03 | 0.0958 | 0.1042 | 0.8958 | 0.9042 | 92 | 1733 | 8175 | 108 | 1866 | 8025 | 4.55 | 10.01 |
| 10000 | 0.82 | 0.1  | 0.9  | 82 | 1800 | 8100 | 2.72 | 0.0958 | 0.1042 | 0.8958 | 0.9042 | 92 | 1733 | 8175 | 108 | 1866 | 8025 | 4.33 | 9.51  |
| 10000 | 0.83 | 0.1  | 0.9  | 83 | 1800 | 8100 | 2.42 | 0.0958 | 0.1042 | 0.8958 | 0.9042 | 92 | 1733 | 8175 | 108 | 1866 | 8025 | 4.12 | 9.03  |
| 10000 | 0.84 | 0.1  | 0.9  | 84 | 1800 | 8100 | 2.14 | 0.0958 | 0.1042 | 0.8958 | 0.9042 | 92 | 1733 | 8175 | 108 | 1866 | 8025 | 3.94 | 8.57  |
| 10000 | 0.85 | 0.1  | 0.9  | 85 | 1800 | 8100 | 1.88 | 0.0958 | 0.1042 | 0.8958 | 0.9042 | 92 | 1733 | 8175 | 108 | 1866 | 8025 | 3.78 | 8.13  |

|       |      |     |     |     |      |      |      |        |        |        |        |    |      |      |     |      |      |       |      |
|-------|------|-----|-----|-----|------|------|------|--------|--------|--------|--------|----|------|------|-----|------|------|-------|------|
| 10000 | 0.86 | 0.1 | 0.9 | 86  | 1800 | 8100 | 1.63 | 0.0958 | 0.1042 | 0.8958 | 0.9042 | 92 | 1733 | 8175 | 108 | 1866 | 8025 | 3.64  | 7.70 |
| 10000 | 0.87 | 0.1 | 0.9 | 87  | 1800 | 8100 | 1.40 | 0.0958 | 0.1042 | 0.8958 | 0.9042 | 92 | 1733 | 8175 | 108 | 1866 | 8025 | 3.53  | 7.30 |
| 10000 | 0.88 | 0.1 | 0.9 | 88  | 1800 | 8100 | 1.19 | 0.0958 | 0.1042 | 0.8958 | 0.9042 | 92 | 1733 | 8175 | 108 | 1866 | 8025 | 3.43  | 6.91 |
| 10000 | 0.89 | 0.1 | 0.9 | 89  | 1800 | 8100 | 1.00 | 0.0958 | 0.1042 | 0.8958 | 0.9042 | 92 | 1733 | 8175 | 108 | 1866 | 8025 | 3.36  | 6.54 |
| 10000 | 0.90 | 0.1 | 0.9 | 90  | 1800 | 8100 | 0.83 | 0.0958 | 0.1042 | 0.8958 | 0.9042 | 92 | 1733 | 8175 | 108 | 1866 | 8025 | 3.31  | 6.19 |
| 10000 | 0.91 | 0.1 | 0.9 | 91  | 1800 | 8100 | 0.67 | 0.0958 | 0.1042 | 0.8958 | 0.9042 | 92 | 1733 | 8175 | 108 | 1866 | 8025 | 3.28  | 5.86 |
| 10000 | 0.92 | 0.1 | 0.9 | 92  | 1800 | 8100 | 0.53 | 0.0958 | 0.1042 | 0.8958 | 0.9042 | 92 | 1733 | 8175 | 108 | 1866 | 8025 | 3.27  | 5.55 |
| 10000 | 0.93 | 0.1 | 0.9 | 93  | 1800 | 8100 | 0.40 | 0.0958 | 0.1042 | 0.8958 | 0.9042 | 92 | 1733 | 8175 | 108 | 1866 | 8025 | 3.28  | 5.25 |
| 10000 | 0.94 | 0.1 | 0.9 | 94  | 1800 | 8100 | 0.29 | 0.0958 | 0.1042 | 0.8958 | 0.9042 | 92 | 1733 | 8175 | 108 | 1866 | 8025 | 3.32  | 4.98 |
| 10000 | 0.95 | 0.1 | 0.9 | 95  | 1800 | 8100 | 0.20 | 0.0958 | 0.1042 | 0.8958 | 0.9042 | 92 | 1733 | 8175 | 108 | 1866 | 8025 | 3.38  | 4.72 |
| 10000 | 0.96 | 0.1 | 0.9 | 96  | 1800 | 8100 | 0.13 | 0.0958 | 0.1042 | 0.8958 | 0.9042 | 92 | 1733 | 8175 | 108 | 1866 | 8025 | 3.46  | 4.48 |
| 10000 | 0.97 | 0.1 | 0.9 | 97  | 1800 | 8100 | 0.07 | 0.0958 | 0.1042 | 0.8958 | 0.9042 | 92 | 1733 | 8175 | 108 | 1866 | 8025 | 3.56  | 4.26 |
| 10000 | 0.98 | 0.1 | 0.9 | 98  | 1800 | 8100 | 0.03 | 0.0958 | 0.1042 | 0.8958 | 0.9042 | 92 | 1733 | 8175 | 108 | 1866 | 8025 | 3.68  | 4.06 |
| 10000 | 0.99 | 0.1 | 0.9 | 99  | 1800 | 8100 | 0.01 | 0.0958 | 0.1042 | 0.8958 | 0.9042 | 92 | 1733 | 8175 | 108 | 1866 | 8025 | 3.82  | 3.87 |
| 10000 | 1.00 | 0.1 | 0.9 | 100 | 1800 | 8100 | 0.00 | 0.0958 | 0.1042 | 0.8958 | 0.9042 | 92 | 1733 | 8175 | 108 | 1866 | 8025 | 3.99  | 3.71 |
| 10000 | 1.01 | 0.1 | 0.9 | 101 | 1800 | 8100 | 0.01 | 0.0958 | 0.1042 | 0.8958 | 0.9042 | 92 | 1733 | 8175 | 108 | 1866 | 8025 | 4.18  | 3.56 |
| 10000 | 1.02 | 0.1 | 0.9 | 102 | 1800 | 8100 | 0.03 | 0.0958 | 0.1042 | 0.8958 | 0.9042 | 92 | 1733 | 8175 | 108 | 1866 | 8025 | 4.39  | 3.43 |
| 10000 | 1.03 | 0.1 | 0.9 | 103 | 1800 | 8100 | 0.07 | 0.0958 | 0.1042 | 0.8958 | 0.9042 | 92 | 1733 | 8175 | 108 | 1866 | 8025 | 4.62  | 3.32 |
| 10000 | 1.04 | 0.1 | 0.9 | 104 | 1800 | 8100 | 0.13 | 0.0958 | 0.1042 | 0.8958 | 0.9042 | 92 | 1733 | 8175 | 108 | 1866 | 8025 | 4.87  | 3.23 |
| 10000 | 1.05 | 0.1 | 0.9 | 105 | 1800 | 8100 | 0.20 | 0.0958 | 0.1042 | 0.8958 | 0.9042 | 92 | 1733 | 8175 | 108 | 1866 | 8025 | 5.15  | 3.15 |
| 10000 | 1.06 | 0.1 | 0.9 | 106 | 1800 | 8100 | 0.29 | 0.0958 | 0.1042 | 0.8958 | 0.9042 | 92 | 1733 | 8175 | 108 | 1866 | 8025 | 5.45  | 3.10 |
| 10000 | 1.07 | 0.1 | 0.9 | 107 | 1800 | 8100 | 0.39 | 0.0958 | 0.1042 | 0.8958 | 0.9042 | 92 | 1733 | 8175 | 108 | 1866 | 8025 | 5.76  | 3.06 |
| 10000 | 1.08 | 0.1 | 0.9 | 108 | 1800 | 8100 | 0.51 | 0.0958 | 0.1042 | 0.8958 | 0.9042 | 92 | 1733 | 8175 | 108 | 1866 | 8025 | 6.11  | 3.04 |
| 10000 | 1.09 | 0.1 | 0.9 | 109 | 1800 | 8100 | 0.65 | 0.0958 | 0.1042 | 0.8958 | 0.9042 | 92 | 1733 | 8175 | 108 | 1866 | 8025 | 6.47  | 3.04 |
| 10000 | 1.10 | 0.1 | 0.9 | 110 | 1800 | 8100 | 0.79 | 0.0958 | 0.1042 | 0.8958 | 0.9042 | 92 | 1733 | 8175 | 108 | 1866 | 8025 | 6.85  | 3.06 |
| 10000 | 1.11 | 0.1 | 0.9 | 111 | 1800 | 8100 | 0.96 | 0.0958 | 0.1042 | 0.8958 | 0.9042 | 92 | 1733 | 8175 | 108 | 1866 | 8025 | 7.26  | 3.10 |
| 10000 | 1.12 | 0.1 | 0.9 | 112 | 1800 | 8100 | 1.14 | 0.0958 | 0.1042 | 0.8958 | 0.9042 | 92 | 1733 | 8175 | 108 | 1866 | 8025 | 7.69  | 3.16 |
| 10000 | 1.13 | 0.1 | 0.9 | 113 | 1800 | 8100 | 1.34 | 0.0958 | 0.1042 | 0.8958 | 0.9042 | 92 | 1733 | 8175 | 108 | 1866 | 8025 | 8.13  | 3.23 |
| 10000 | 1.14 | 0.1 | 0.9 | 114 | 1800 | 8100 | 1.55 | 0.0958 | 0.1042 | 0.8958 | 0.9042 | 92 | 1733 | 8175 | 108 | 1866 | 8025 | 8.61  | 3.32 |
| 10000 | 1.15 | 0.1 | 0.9 | 115 | 1800 | 8100 | 1.77 | 0.0958 | 0.1042 | 0.8958 | 0.9042 | 92 | 1733 | 8175 | 108 | 1866 | 8025 | 9.10  | 3.43 |
| 10000 | 1.16 | 0.1 | 0.9 | 116 | 1800 | 8100 | 2.01 | 0.0958 | 0.1042 | 0.8958 | 0.9042 | 92 | 1733 | 8175 | 108 | 1866 | 8025 | 9.61  | 3.56 |
| 10000 | 1.17 | 0.1 | 0.9 | 117 | 1800 | 8100 | 2.27 | 0.0958 | 0.1042 | 0.8958 | 0.9042 | 92 | 1733 | 8175 | 108 | 1866 | 8025 | 10.15 | 3.71 |
| 10000 | 1.18 | 0.1 | 0.9 | 118 | 1800 | 8100 | 2.54 | 0.0958 | 0.1042 | 0.8958 | 0.9042 | 92 | 1733 | 8175 | 108 | 1866 | 8025 | 10.71 | 3.88 |
| 10000 | 1.19 | 0.1 | 0.9 | 119 | 1800 | 8100 | 2.82 | 0.0958 | 0.1042 | 0.8958 | 0.9042 | 92 | 1733 | 8175 | 108 | 1866 | 8025 | 11.29 | 4.06 |
| 10000 | 1.20 | 0.1 | 0.9 | 120 | 1800 | 8100 | 3.12 | 0.0958 | 0.1042 | 0.8958 | 0.9042 | 92 | 1733 | 8175 | 108 | 1866 | 8025 | 11.89 | 4.26 |

|       |      |      |      |     |      |      |      |        |        |        |        |     |      |      |     |      |      |       |       |
|-------|------|------|------|-----|------|------|------|--------|--------|--------|--------|-----|------|------|-----|------|------|-------|-------|
| 10000 | 0.80 | 0.15 | 0.85 | 180 | 2550 | 7225 | 6.88 | 0.1451 | 0.1549 | 0.8451 | 0.8549 | 210 | 2480 | 7309 | 240 | 2619 | 7141 | 7.33  | 17.83 |
| 10000 | 0.81 | 0.15 | 0.85 | 182 | 2550 | 7225 | 6.19 | 0.1451 | 0.1549 | 0.8451 | 0.8549 | 210 | 2480 | 7309 | 240 | 2619 | 7141 | 6.70  | 16.73 |
| 10000 | 0.82 | 0.15 | 0.85 | 185 | 2550 | 7225 | 5.54 | 0.1451 | 0.1549 | 0.8451 | 0.8549 | 210 | 2480 | 7309 | 240 | 2619 | 7141 | 6.12  | 15.66 |
| 10000 | 0.83 | 0.15 | 0.85 | 187 | 2550 | 7225 | 4.93 | 0.1451 | 0.1549 | 0.8451 | 0.8549 | 210 | 2480 | 7309 | 240 | 2619 | 7141 | 5.59  | 14.64 |
| 10000 | 0.84 | 0.15 | 0.85 | 189 | 2550 | 7225 | 4.35 | 0.1451 | 0.1549 | 0.8451 | 0.8549 | 210 | 2480 | 7309 | 240 | 2619 | 7141 | 5.11  | 13.66 |
| 10000 | 0.85 | 0.15 | 0.85 | 191 | 2550 | 7225 | 3.82 | 0.1451 | 0.1549 | 0.8451 | 0.8549 | 210 | 2480 | 7309 | 240 | 2619 | 7141 | 4.68  | 12.73 |
| 10000 | 0.86 | 0.15 | 0.85 | 194 | 2550 | 7225 | 3.31 | 0.1451 | 0.1549 | 0.8451 | 0.8549 | 210 | 2480 | 7309 | 240 | 2619 | 7141 | 4.29  | 11.83 |
| 10000 | 0.87 | 0.15 | 0.85 | 196 | 2550 | 7225 | 2.85 | 0.1451 | 0.1549 | 0.8451 | 0.8549 | 210 | 2480 | 7309 | 240 | 2619 | 7141 | 3.96  | 10.98 |
| 10000 | 0.88 | 0.15 | 0.85 | 198 | 2550 | 7225 | 2.42 | 0.1451 | 0.1549 | 0.8451 | 0.8549 | 210 | 2480 | 7309 | 240 | 2619 | 7141 | 3.67  | 10.17 |
| 10000 | 0.89 | 0.15 | 0.85 | 200 | 2550 | 7225 | 2.03 | 0.1451 | 0.1549 | 0.8451 | 0.8549 | 210 | 2480 | 7309 | 240 | 2619 | 7141 | 3.43  | 9.40  |
| 10000 | 0.90 | 0.15 | 0.85 | 203 | 2550 | 7225 | 1.67 | 0.1451 | 0.1549 | 0.8451 | 0.8549 | 210 | 2480 | 7309 | 240 | 2619 | 7141 | 3.23  | 8.68  |
| 10000 | 0.91 | 0.15 | 0.85 | 205 | 2550 | 7225 | 1.35 | 0.1451 | 0.1549 | 0.8451 | 0.8549 | 210 | 2480 | 7309 | 240 | 2619 | 7141 | 3.09  | 7.99  |
| 10000 | 0.92 | 0.15 | 0.85 | 207 | 2550 | 7225 | 1.06 | 0.1451 | 0.1549 | 0.8451 | 0.8549 | 210 | 2480 | 7309 | 240 | 2619 | 7141 | 2.99  | 7.35  |
| 10000 | 0.93 | 0.15 | 0.85 | 209 | 2550 | 7225 | 0.81 | 0.1451 | 0.1549 | 0.8451 | 0.8549 | 210 | 2480 | 7309 | 240 | 2619 | 7141 | 2.94  | 6.75  |
| 10000 | 0.94 | 0.15 | 0.85 | 212 | 2550 | 7225 | 0.60 | 0.1451 | 0.1549 | 0.8451 | 0.8549 | 210 | 2480 | 7309 | 240 | 2619 | 7141 | 2.94  | 6.20  |
| 10000 | 0.95 | 0.15 | 0.85 | 214 | 2550 | 7225 | 0.41 | 0.1451 | 0.1549 | 0.8451 | 0.8549 | 210 | 2480 | 7309 | 240 | 2619 | 7141 | 2.99  | 5.68  |
| 10000 | 0.96 | 0.15 | 0.85 | 216 | 2550 | 7225 | 0.26 | 0.1451 | 0.1549 | 0.8451 | 0.8549 | 210 | 2480 | 7309 | 240 | 2619 | 7141 | 3.09  | 5.21  |
| 10000 | 0.97 | 0.15 | 0.85 | 218 | 2550 | 7225 | 0.15 | 0.1451 | 0.1549 | 0.8451 | 0.8549 | 210 | 2480 | 7309 | 240 | 2619 | 7141 | 3.23  | 4.78  |
| 10000 | 0.98 | 0.15 | 0.85 | 221 | 2550 | 7225 | 0.07 | 0.1451 | 0.1549 | 0.8451 | 0.8549 | 210 | 2480 | 7309 | 240 | 2619 | 7141 | 3.42  | 4.39  |
| 10000 | 0.99 | 0.15 | 0.85 | 223 | 2550 | 7225 | 0.02 | 0.1451 | 0.1549 | 0.8451 | 0.8549 | 210 | 2480 | 7309 | 240 | 2619 | 7141 | 3.66  | 4.04  |
| 10000 | 1.00 | 0.15 | 0.85 | 225 | 2550 | 7225 | 0.00 | 0.1451 | 0.1549 | 0.8451 | 0.8549 | 210 | 2480 | 7309 | 240 | 2619 | 7141 | 3.95  | 3.74  |
| 10000 | 1.01 | 0.15 | 0.85 | 227 | 2550 | 7225 | 0.02 | 0.1451 | 0.1549 | 0.8451 | 0.8549 | 210 | 2480 | 7309 | 240 | 2619 | 7141 | 4.29  | 3.48  |
| 10000 | 1.02 | 0.15 | 0.85 | 230 | 2550 | 7225 | 0.06 | 0.1451 | 0.1549 | 0.8451 | 0.8549 | 210 | 2480 | 7309 | 240 | 2619 | 7141 | 4.67  | 3.26  |
| 10000 | 1.03 | 0.15 | 0.85 | 232 | 2550 | 7225 | 0.15 | 0.1451 | 0.1549 | 0.8451 | 0.8549 | 210 | 2480 | 7309 | 240 | 2619 | 7141 | 5.10  | 3.08  |
| 10000 | 1.04 | 0.15 | 0.85 | 234 | 2550 | 7225 | 0.26 | 0.1451 | 0.1549 | 0.8451 | 0.8549 | 210 | 2480 | 7309 | 240 | 2619 | 7141 | 5.58  | 2.95  |
| 10000 | 1.05 | 0.15 | 0.85 | 236 | 2550 | 7225 | 0.40 | 0.1451 | 0.1549 | 0.8451 | 0.8549 | 210 | 2480 | 7309 | 240 | 2619 | 7141 | 6.11  | 2.85  |
| 10000 | 1.06 | 0.15 | 0.85 | 239 | 2550 | 7225 | 0.58 | 0.1451 | 0.1549 | 0.8451 | 0.8549 | 210 | 2480 | 7309 | 240 | 2619 | 7141 | 6.69  | 2.80  |
| 10000 | 1.07 | 0.15 | 0.85 | 241 | 2550 | 7225 | 0.78 | 0.1451 | 0.1549 | 0.8451 | 0.8549 | 210 | 2480 | 7309 | 240 | 2619 | 7141 | 7.32  | 2.79  |
| 10000 | 1.08 | 0.15 | 0.85 | 243 | 2550 | 7225 | 1.02 | 0.1451 | 0.1549 | 0.8451 | 0.8549 | 210 | 2480 | 7309 | 240 | 2619 | 7141 | 7.99  | 2.83  |
| 10000 | 1.09 | 0.15 | 0.85 | 245 | 2550 | 7225 | 1.28 | 0.1451 | 0.1549 | 0.8451 | 0.8549 | 210 | 2480 | 7309 | 240 | 2619 | 7141 | 8.71  | 2.90  |
| 10000 | 1.10 | 0.15 | 0.85 | 248 | 2550 | 7225 | 1.58 | 0.1451 | 0.1549 | 0.8451 | 0.8549 | 210 | 2480 | 7309 | 240 | 2619 | 7141 | 9.48  | 3.02  |
| 10000 | 1.11 | 0.15 | 0.85 | 250 | 2550 | 7225 | 1.91 | 0.1451 | 0.1549 | 0.8451 | 0.8549 | 210 | 2480 | 7309 | 240 | 2619 | 7141 | 10.30 | 3.18  |
| 10000 | 1.12 | 0.15 | 0.85 | 252 | 2550 | 7225 | 2.26 | 0.1451 | 0.1549 | 0.8451 | 0.8549 | 210 | 2480 | 7309 | 240 | 2619 | 7141 | 11.16 | 3.38  |
| 10000 | 1.13 | 0.15 | 0.85 | 254 | 2550 | 7225 | 2.65 | 0.1451 | 0.1549 | 0.8451 | 0.8549 | 210 | 2480 | 7309 | 240 | 2619 | 7141 | 12.08 | 3.63  |
| 10000 | 1.14 | 0.15 | 0.85 | 257 | 2550 | 7225 | 3.07 | 0.1451 | 0.1549 | 0.8451 | 0.8549 | 210 | 2480 | 7309 | 240 | 2619 | 7141 | 13.04 | 3.91  |

|       |      |      |      |     |      |      |       |        |        |        |        |     |      |      |     |      |      |       |       |
|-------|------|------|------|-----|------|------|-------|--------|--------|--------|--------|-----|------|------|-----|------|------|-------|-------|
| 10000 | 1.15 | 0.15 | 0.85 | 259 | 2550 | 7225 | 3.51  | 0.1451 | 0.1549 | 0.8451 | 0.8549 | 210 | 2480 | 7309 | 240 | 2619 | 7141 | 14.05 | 4.24  |
| 10000 | 1.16 | 0.15 | 0.85 | 261 | 2550 | 7225 | 3.98  | 0.1451 | 0.1549 | 0.8451 | 0.8549 | 210 | 2480 | 7309 | 240 | 2619 | 7141 | 15.11 | 4.61  |
| 10000 | 1.17 | 0.15 | 0.85 | 263 | 2550 | 7225 | 4.48  | 0.1451 | 0.1549 | 0.8451 | 0.8549 | 210 | 2480 | 7309 | 240 | 2619 | 7141 | 16.21 | 5.03  |
| 10000 | 1.18 | 0.15 | 0.85 | 266 | 2550 | 7225 | 5.01  | 0.1451 | 0.1549 | 0.8451 | 0.8549 | 210 | 2480 | 7309 | 240 | 2619 | 7141 | 17.37 | 5.48  |
| 10000 | 1.19 | 0.15 | 0.85 | 268 | 2550 | 7225 | 5.57  | 0.1451 | 0.1549 | 0.8451 | 0.8549 | 210 | 2480 | 7309 | 240 | 2619 | 7141 | 18.57 | 5.98  |
| 10000 | 1.20 | 0.15 | 0.85 | 270 | 2550 | 7225 | 6.16  | 0.1451 | 0.1549 | 0.8451 | 0.8549 | 210 | 2480 | 7309 | 240 | 2619 | 7141 | 19.82 | 6.52  |
| 10000 | 0.80 | 0.2  | 0.8  | 320 | 3200 | 6400 | 11.02 | 0.1945 | 0.2055 | 0.7945 | 0.8055 | 378 | 3133 | 6489 | 422 | 3266 | 6312 | 11.60 | 27.43 |
| 10000 | 0.81 | 0.2  | 0.8  | 324 | 3200 | 6400 | 9.91  | 0.1945 | 0.2055 | 0.7945 | 0.8055 | 378 | 3133 | 6489 | 422 | 3266 | 6312 | 10.41 | 25.52 |
| 10000 | 0.82 | 0.2  | 0.8  | 328 | 3200 | 6400 | 8.86  | 0.1945 | 0.2055 | 0.7945 | 0.8055 | 378 | 3133 | 6489 | 422 | 3266 | 6312 | 9.31  | 23.70 |
| 10000 | 0.83 | 0.2  | 0.8  | 332 | 3200 | 6400 | 7.87  | 0.1945 | 0.2055 | 0.7945 | 0.8055 | 378 | 3133 | 6489 | 422 | 3266 | 6312 | 8.29  | 21.95 |
| 10000 | 0.84 | 0.2  | 0.8  | 336 | 3200 | 6400 | 6.95  | 0.1945 | 0.2055 | 0.7945 | 0.8055 | 378 | 3133 | 6489 | 422 | 3266 | 6312 | 7.35  | 20.27 |
| 10000 | 0.85 | 0.2  | 0.8  | 340 | 3200 | 6400 | 6.09  | 0.1945 | 0.2055 | 0.7945 | 0.8055 | 378 | 3133 | 6489 | 422 | 3266 | 6312 | 6.51  | 18.67 |
| 10000 | 0.86 | 0.2  | 0.8  | 344 | 3200 | 6400 | 5.28  | 0.1945 | 0.2055 | 0.7945 | 0.8055 | 378 | 3133 | 6489 | 422 | 3266 | 6312 | 5.74  | 17.15 |
| 10000 | 0.87 | 0.2  | 0.8  | 348 | 3200 | 6400 | 4.54  | 0.1945 | 0.2055 | 0.7945 | 0.8055 | 378 | 3133 | 6489 | 422 | 3266 | 6312 | 5.06  | 15.70 |
| 10000 | 0.88 | 0.2  | 0.8  | 352 | 3200 | 6400 | 3.85  | 0.1945 | 0.2055 | 0.7945 | 0.8055 | 378 | 3133 | 6489 | 422 | 3266 | 6312 | 4.47  | 14.33 |
| 10000 | 0.89 | 0.2  | 0.8  | 356 | 3200 | 6400 | 3.22  | 0.1945 | 0.2055 | 0.7945 | 0.8055 | 378 | 3133 | 6489 | 422 | 3266 | 6312 | 3.96  | 13.03 |
| 10000 | 0.90 | 0.2  | 0.8  | 360 | 3200 | 6400 | 2.65  | 0.1945 | 0.2055 | 0.7945 | 0.8055 | 378 | 3133 | 6489 | 422 | 3266 | 6312 | 3.53  | 11.81 |
| 10000 | 0.91 | 0.2  | 0.8  | 364 | 3200 | 6400 | 2.14  | 0.1945 | 0.2055 | 0.7945 | 0.8055 | 378 | 3133 | 6489 | 422 | 3266 | 6312 | 3.19  | 10.66 |
| 10000 | 0.92 | 0.2  | 0.8  | 368 | 3200 | 6400 | 1.69  | 0.1945 | 0.2055 | 0.7945 | 0.8055 | 378 | 3133 | 6489 | 422 | 3266 | 6312 | 2.93  | 9.59  |
| 10000 | 0.93 | 0.2  | 0.8  | 372 | 3200 | 6400 | 1.29  | 0.1945 | 0.2055 | 0.7945 | 0.8055 | 378 | 3133 | 6489 | 422 | 3266 | 6312 | 2.76  | 8.60  |
| 10000 | 0.94 | 0.2  | 0.8  | 376 | 3200 | 6400 | 0.94  | 0.1945 | 0.2055 | 0.7945 | 0.8055 | 378 | 3133 | 6489 | 422 | 3266 | 6312 | 2.67  | 7.68  |
| 10000 | 0.95 | 0.2  | 0.8  | 380 | 3200 | 6400 | 0.65  | 0.1945 | 0.2055 | 0.7945 | 0.8055 | 378 | 3133 | 6489 | 422 | 3266 | 6312 | 2.67  | 6.84  |
| 10000 | 0.96 | 0.2  | 0.8  | 384 | 3200 | 6400 | 0.42  | 0.1945 | 0.2055 | 0.7945 | 0.8055 | 378 | 3133 | 6489 | 422 | 3266 | 6312 | 2.75  | 6.07  |
| 10000 | 0.97 | 0.2  | 0.8  | 388 | 3200 | 6400 | 0.23  | 0.1945 | 0.2055 | 0.7945 | 0.8055 | 378 | 3133 | 6489 | 422 | 3266 | 6312 | 2.92  | 5.38  |
| 10000 | 0.98 | 0.2  | 0.8  | 392 | 3200 | 6400 | 0.10  | 0.1945 | 0.2055 | 0.7945 | 0.8055 | 378 | 3133 | 6489 | 422 | 3266 | 6312 | 3.17  | 4.77  |
| 10000 | 0.99 | 0.2  | 0.8  | 396 | 3200 | 6400 | 0.03  | 0.1945 | 0.2055 | 0.7945 | 0.8055 | 378 | 3133 | 6489 | 422 | 3266 | 6312 | 3.50  | 4.23  |
| 10000 | 1.00 | 0.2  | 0.8  | 400 | 3200 | 6400 | 0.00  | 0.1945 | 0.2055 | 0.7945 | 0.8055 | 378 | 3133 | 6489 | 422 | 3266 | 6312 | 3.92  | 3.76  |
| 10000 | 1.01 | 0.2  | 0.8  | 404 | 3200 | 6400 | 0.03  | 0.1945 | 0.2055 | 0.7945 | 0.8055 | 378 | 3133 | 6489 | 422 | 3266 | 6312 | 4.43  | 3.38  |
| 10000 | 1.02 | 0.2  | 0.8  | 408 | 3200 | 6400 | 0.10  | 0.1945 | 0.2055 | 0.7945 | 0.8055 | 378 | 3133 | 6489 | 422 | 3266 | 6312 | 5.02  | 3.06  |
| 10000 | 1.03 | 0.2  | 0.8  | 412 | 3200 | 6400 | 0.23  | 0.1945 | 0.2055 | 0.7945 | 0.8055 | 378 | 3133 | 6489 | 422 | 3266 | 6312 | 5.69  | 2.83  |
| 10000 | 1.04 | 0.2  | 0.8  | 416 | 3200 | 6400 | 0.40  | 0.1945 | 0.2055 | 0.7945 | 0.8055 | 378 | 3133 | 6489 | 422 | 3266 | 6312 | 6.45  | 2.67  |
| 10000 | 1.05 | 0.2  | 0.8  | 420 | 3200 | 6400 | 0.63  | 0.1945 | 0.2055 | 0.7945 | 0.8055 | 378 | 3133 | 6489 | 422 | 3266 | 6312 | 7.30  | 2.58  |
| 10000 | 1.06 | 0.2  | 0.8  | 424 | 3200 | 6400 | 0.90  | 0.1945 | 0.2055 | 0.7945 | 0.8055 | 378 | 3133 | 6489 | 422 | 3266 | 6312 | 8.22  | 2.57  |
| 10000 | 1.07 | 0.2  | 0.8  | 428 | 3200 | 6400 | 1.22  | 0.1945 | 0.2055 | 0.7945 | 0.8055 | 378 | 3133 | 6489 | 422 | 3266 | 6312 | 9.24  | 2.64  |
| 10000 | 1.08 | 0.2  | 0.8  | 432 | 3200 | 6400 | 1.59  | 0.1945 | 0.2055 | 0.7945 | 0.8055 | 378 | 3133 | 6489 | 422 | 3266 | 6312 | 10.33 | 2.78  |

|       |      |      |      |     |      |      |       |        |        |        |        |     |      |      |     |      |      |       |       |
|-------|------|------|------|-----|------|------|-------|--------|--------|--------|--------|-----|------|------|-----|------|------|-------|-------|
| 10000 | 1.09 | 0.2  | 0.8  | 436 | 3200 | 6400 | 2.01  | 0.1945 | 0.2055 | 0.7945 | 0.8055 | 378 | 3133 | 6489 | 422 | 3266 | 6312 | 11.52 | 3.00  |
| 10000 | 1.10 | 0.2  | 0.8  | 440 | 3200 | 6400 | 2.47  | 0.1945 | 0.2055 | 0.7945 | 0.8055 | 378 | 3133 | 6489 | 422 | 3266 | 6312 | 12.78 | 3.29  |
| 10000 | 1.11 | 0.2  | 0.8  | 444 | 3200 | 6400 | 2.98  | 0.1945 | 0.2055 | 0.7945 | 0.8055 | 378 | 3133 | 6489 | 422 | 3266 | 6312 | 14.13 | 3.66  |
| 10000 | 1.12 | 0.2  | 0.8  | 448 | 3200 | 6400 | 3.53  | 0.1945 | 0.2055 | 0.7945 | 0.8055 | 378 | 3133 | 6489 | 422 | 3266 | 6312 | 15.57 | 4.11  |
| 10000 | 1.13 | 0.2  | 0.8  | 452 | 3200 | 6400 | 4.13  | 0.1945 | 0.2055 | 0.7945 | 0.8055 | 378 | 3133 | 6489 | 422 | 3266 | 6312 | 17.09 | 4.63  |
| 10000 | 1.14 | 0.2  | 0.8  | 456 | 3200 | 6400 | 4.77  | 0.1945 | 0.2055 | 0.7945 | 0.8055 | 378 | 3133 | 6489 | 422 | 3266 | 6312 | 18.69 | 5.23  |
| 10000 | 1.15 | 0.2  | 0.8  | 460 | 3200 | 6400 | 5.46  | 0.1945 | 0.2055 | 0.7945 | 0.8055 | 378 | 3133 | 6489 | 422 | 3266 | 6312 | 20.38 | 5.90  |
| 10000 | 1.16 | 0.2  | 0.8  | 464 | 3200 | 6400 | 6.19  | 0.1945 | 0.2055 | 0.7945 | 0.8055 | 378 | 3133 | 6489 | 422 | 3266 | 6312 | 22.16 | 6.65  |
| 10000 | 1.17 | 0.2  | 0.8  | 468 | 3200 | 6400 | 6.97  | 0.1945 | 0.2055 | 0.7945 | 0.8055 | 378 | 3133 | 6489 | 422 | 3266 | 6312 | 24.02 | 7.47  |
| 10000 | 1.18 | 0.2  | 0.8  | 472 | 3200 | 6400 | 7.78  | 0.1945 | 0.2055 | 0.7945 | 0.8055 | 378 | 3133 | 6489 | 422 | 3266 | 6312 | 25.96 | 8.37  |
| 10000 | 1.19 | 0.2  | 0.8  | 476 | 3200 | 6400 | 8.64  | 0.1945 | 0.2055 | 0.7945 | 0.8055 | 378 | 3133 | 6489 | 422 | 3266 | 6312 | 27.99 | 9.35  |
| 10000 | 1.20 | 0.2  | 0.8  | 480 | 3200 | 6400 | 9.54  | 0.1945 | 0.2055 | 0.7945 | 0.8055 | 378 | 3133 | 6489 | 422 | 3266 | 6312 | 30.10 | 10.40 |
| 10000 | 0.80 | 0.25 | 0.75 | 500 | 3750 | 5625 | 15.39 | 0.2440 | 0.2560 | 0.7440 | 0.7560 | 595 | 3689 | 5715 | 655 | 3809 | 5535 | 17.70 | 39.21 |
| 10000 | 0.81 | 0.25 | 0.75 | 506 | 3750 | 5625 | 13.82 | 0.2440 | 0.2560 | 0.7440 | 0.7560 | 595 | 3689 | 5715 | 655 | 3809 | 5535 | 15.76 | 36.30 |
| 10000 | 0.82 | 0.25 | 0.75 | 513 | 3750 | 5625 | 12.35 | 0.2440 | 0.2560 | 0.7440 | 0.7560 | 595 | 3689 | 5715 | 655 | 3809 | 5535 | 13.96 | 33.52 |
| 10000 | 0.83 | 0.25 | 0.75 | 519 | 3750 | 5625 | 10.96 | 0.2440 | 0.2560 | 0.7440 | 0.7560 | 595 | 3689 | 5715 | 655 | 3809 | 5535 | 12.29 | 30.85 |
| 10000 | 0.84 | 0.25 | 0.75 | 525 | 3750 | 5625 | 9.67  | 0.2440 | 0.2560 | 0.7440 | 0.7560 | 595 | 3689 | 5715 | 655 | 3809 | 5535 | 10.74 | 28.31 |
| 10000 | 0.85 | 0.25 | 0.75 | 531 | 3750 | 5625 | 8.46  | 0.2440 | 0.2560 | 0.7440 | 0.7560 | 595 | 3689 | 5715 | 655 | 3809 | 5535 | 9.33  | 25.88 |
| 10000 | 0.86 | 0.25 | 0.75 | 538 | 3750 | 5625 | 7.33  | 0.2440 | 0.2560 | 0.7440 | 0.7560 | 595 | 3689 | 5715 | 655 | 3809 | 5535 | 8.05  | 23.57 |
| 10000 | 0.87 | 0.25 | 0.75 | 544 | 3750 | 5625 | 6.30  | 0.2440 | 0.2560 | 0.7440 | 0.7560 | 595 | 3689 | 5715 | 655 | 3809 | 5535 | 6.90  | 21.38 |
| 10000 | 0.88 | 0.25 | 0.75 | 550 | 3750 | 5625 | 5.34  | 0.2440 | 0.2560 | 0.7440 | 0.7560 | 595 | 3689 | 5715 | 655 | 3809 | 5535 | 5.88  | 19.32 |
| 10000 | 0.89 | 0.25 | 0.75 | 556 | 3750 | 5625 | 4.47  | 0.2440 | 0.2560 | 0.7440 | 0.7560 | 595 | 3689 | 5715 | 655 | 3809 | 5535 | 5.00  | 17.37 |
| 10000 | 0.90 | 0.25 | 0.75 | 563 | 3750 | 5625 | 3.68  | 0.2440 | 0.2560 | 0.7440 | 0.7560 | 595 | 3689 | 5715 | 655 | 3809 | 5535 | 4.24  | 15.53 |
| 10000 | 0.91 | 0.25 | 0.75 | 569 | 3750 | 5625 | 2.96  | 0.2440 | 0.2560 | 0.7440 | 0.7560 | 595 | 3689 | 5715 | 655 | 3809 | 5535 | 3.62  | 13.82 |
| 10000 | 0.92 | 0.25 | 0.75 | 575 | 3750 | 5625 | 2.33  | 0.2440 | 0.2560 | 0.7440 | 0.7560 | 595 | 3689 | 5715 | 655 | 3809 | 5535 | 3.12  | 12.23 |
| 10000 | 0.93 | 0.25 | 0.75 | 581 | 3750 | 5625 | 1.78  | 0.2440 | 0.2560 | 0.7440 | 0.7560 | 595 | 3689 | 5715 | 655 | 3809 | 5535 | 2.76  | 10.76 |
| 10000 | 0.94 | 0.25 | 0.75 | 588 | 3750 | 5625 | 1.30  | 0.2440 | 0.2560 | 0.7440 | 0.7560 | 595 | 3689 | 5715 | 655 | 3809 | 5535 | 2.53  | 9.40  |
| 10000 | 0.95 | 0.25 | 0.75 | 594 | 3750 | 5625 | 0.90  | 0.2440 | 0.2560 | 0.7440 | 0.7560 | 595 | 3689 | 5715 | 655 | 3809 | 5535 | 2.43  | 8.17  |
| 10000 | 0.96 | 0.25 | 0.75 | 600 | 3750 | 5625 | 0.57  | 0.2440 | 0.2560 | 0.7440 | 0.7560 | 595 | 3689 | 5715 | 655 | 3809 | 5535 | 2.47  | 7.05  |
| 10000 | 0.97 | 0.25 | 0.75 | 606 | 3750 | 5625 | 0.32  | 0.2440 | 0.2560 | 0.7440 | 0.7560 | 595 | 3689 | 5715 | 655 | 3809 | 5535 | 2.63  | 6.06  |
| 10000 | 0.98 | 0.25 | 0.75 | 613 | 3750 | 5625 | 0.14  | 0.2440 | 0.2560 | 0.7440 | 0.7560 | 595 | 3689 | 5715 | 655 | 3809 | 5535 | 2.92  | 5.18  |
| 10000 | 0.99 | 0.25 | 0.75 | 619 | 3750 | 5625 | 0.04  | 0.2440 | 0.2560 | 0.7440 | 0.7560 | 595 | 3689 | 5715 | 655 | 3809 | 5535 | 3.35  | 4.42  |
| 10000 | 1.00 | 0.25 | 0.75 | 625 | 3750 | 5625 | 0.00  | 0.2440 | 0.2560 | 0.7440 | 0.7560 | 595 | 3689 | 5715 | 655 | 3809 | 5535 | 3.91  | 3.78  |
| 10000 | 1.01 | 0.25 | 0.75 | 631 | 3750 | 5625 | 0.04  | 0.2440 | 0.2560 | 0.7440 | 0.7560 | 595 | 3689 | 5715 | 655 | 3809 | 5535 | 4.59  | 3.26  |
| 10000 | 1.02 | 0.25 | 0.75 | 638 | 3750 | 5625 | 0.14  | 0.2440 | 0.2560 | 0.7440 | 0.7560 | 595 | 3689 | 5715 | 655 | 3809 | 5535 | 5.41  | 2.86  |

|       |      |      |      |     |      |      |       |        |        |        |        |     |      |      |     |      |      |       |       |
|-------|------|------|------|-----|------|------|-------|--------|--------|--------|--------|-----|------|------|-----|------|------|-------|-------|
| 10000 | 1.03 | 0.25 | 0.75 | 644 | 3750 | 5625 | 0.31  | 0.2440 | 0.2560 | 0.7440 | 0.7560 | 595 | 3689 | 5715 | 655 | 3809 | 5535 | 6.36  | 2.58  |
| 10000 | 1.04 | 0.25 | 0.75 | 650 | 3750 | 5625 | 0.55  | 0.2440 | 0.2560 | 0.7440 | 0.7560 | 595 | 3689 | 5715 | 655 | 3809 | 5535 | 7.44  | 2.42  |
| 10000 | 1.05 | 0.25 | 0.75 | 656 | 3750 | 5625 | 0.86  | 0.2440 | 0.2560 | 0.7440 | 0.7560 | 595 | 3689 | 5715 | 655 | 3809 | 5535 | 8.66  | 2.38  |
| 10000 | 1.06 | 0.25 | 0.75 | 663 | 3750 | 5625 | 1.23  | 0.2440 | 0.2560 | 0.7440 | 0.7560 | 595 | 3689 | 5715 | 655 | 3809 | 5535 | 10.00 | 2.45  |
| 10000 | 1.07 | 0.25 | 0.75 | 669 | 3750 | 5625 | 1.67  | 0.2440 | 0.2560 | 0.7440 | 0.7560 | 595 | 3689 | 5715 | 655 | 3809 | 5535 | 11.48 | 2.65  |
| 10000 | 1.08 | 0.25 | 0.75 | 675 | 3750 | 5625 | 2.17  | 0.2440 | 0.2560 | 0.7440 | 0.7560 | 595 | 3689 | 5715 | 655 | 3809 | 5535 | 13.08 | 2.96  |
| 10000 | 1.09 | 0.25 | 0.75 | 681 | 3750 | 5625 | 2.74  | 0.2440 | 0.2560 | 0.7440 | 0.7560 | 595 | 3689 | 5715 | 655 | 3809 | 5535 | 14.82 | 3.40  |
| 10000 | 1.10 | 0.25 | 0.75 | 688 | 3750 | 5625 | 3.37  | 0.2440 | 0.2560 | 0.7440 | 0.7560 | 595 | 3689 | 5715 | 655 | 3809 | 5535 | 16.69 | 3.95  |
| 10000 | 1.11 | 0.25 | 0.75 | 694 | 3750 | 5625 | 4.06  | 0.2440 | 0.2560 | 0.7440 | 0.7560 | 595 | 3689 | 5715 | 655 | 3809 | 5535 | 18.69 | 4.62  |
| 10000 | 1.12 | 0.25 | 0.75 | 700 | 3750 | 5625 | 4.81  | 0.2440 | 0.2560 | 0.7440 | 0.7560 | 595 | 3689 | 5715 | 655 | 3809 | 5535 | 20.82 | 5.41  |
| 10000 | 1.13 | 0.25 | 0.75 | 706 | 3750 | 5625 | 5.62  | 0.2440 | 0.2560 | 0.7440 | 0.7560 | 595 | 3689 | 5715 | 655 | 3809 | 5535 | 23.09 | 6.33  |
| 10000 | 1.14 | 0.25 | 0.75 | 713 | 3750 | 5625 | 6.49  | 0.2440 | 0.2560 | 0.7440 | 0.7560 | 595 | 3689 | 5715 | 655 | 3809 | 5535 | 25.48 | 7.36  |
| 10000 | 1.15 | 0.25 | 0.75 | 719 | 3750 | 5625 | 7.42  | 0.2440 | 0.2560 | 0.7440 | 0.7560 | 595 | 3689 | 5715 | 655 | 3809 | 5535 | 28.00 | 8.51  |
| 10000 | 1.16 | 0.25 | 0.75 | 725 | 3750 | 5625 | 8.40  | 0.2440 | 0.2560 | 0.7440 | 0.7560 | 595 | 3689 | 5715 | 655 | 3809 | 5535 | 30.66 | 9.77  |
| 10000 | 1.17 | 0.25 | 0.75 | 731 | 3750 | 5625 | 9.45  | 0.2440 | 0.2560 | 0.7440 | 0.7560 | 595 | 3689 | 5715 | 655 | 3809 | 5535 | 33.45 | 11.16 |
| 10000 | 1.18 | 0.25 | 0.75 | 738 | 3750 | 5625 | 10.55 | 0.2440 | 0.2560 | 0.7440 | 0.7560 | 595 | 3689 | 5715 | 655 | 3809 | 5535 | 36.37 | 12.67 |
| 10000 | 1.19 | 0.25 | 0.75 | 744 | 3750 | 5625 | 11.70 | 0.2440 | 0.2560 | 0.7440 | 0.7560 | 595 | 3689 | 5715 | 655 | 3809 | 5535 | 39.42 | 14.29 |
| 10000 | 1.20 | 0.25 | 0.75 | 750 | 3750 | 5625 | 12.91 | 0.2440 | 0.2560 | 0.7440 | 0.7560 | 595 | 3689 | 5715 | 655 | 3809 | 5535 | 42.60 | 16.04 |
| 10000 | 0.80 | 0.3  | 0.7  | 720 | 4200 | 4900 | 19.60 | 0.2936 | 0.3064 | 0.6936 | 0.7064 | 862 | 4148 | 4989 | 939 | 4250 | 4811 | 25.72 | 53.09 |
| 10000 | 0.81 | 0.3  | 0.7  | 729 | 4200 | 4900 | 17.60 | 0.2936 | 0.3064 | 0.6936 | 0.7064 | 862 | 4148 | 4989 | 939 | 4250 | 4811 | 22.85 | 48.99 |
| 10000 | 0.82 | 0.3  | 0.7  | 738 | 4200 | 4900 | 15.71 | 0.2936 | 0.3064 | 0.6936 | 0.7064 | 862 | 4148 | 4989 | 939 | 4250 | 4811 | 20.16 | 45.06 |
| 10000 | 0.83 | 0.3  | 0.7  | 747 | 4200 | 4900 | 13.94 | 0.2936 | 0.3064 | 0.6936 | 0.7064 | 862 | 4148 | 4989 | 939 | 4250 | 4811 | 17.66 | 41.30 |
| 10000 | 0.84 | 0.3  | 0.7  | 756 | 4200 | 4900 | 12.28 | 0.2936 | 0.3064 | 0.6936 | 0.7064 | 862 | 4148 | 4989 | 939 | 4250 | 4811 | 15.34 | 37.71 |
| 10000 | 0.85 | 0.3  | 0.7  | 765 | 4200 | 4900 | 10.73 | 0.2936 | 0.3064 | 0.6936 | 0.7064 | 862 | 4148 | 4989 | 939 | 4250 | 4811 | 13.22 | 34.29 |
| 10000 | 0.86 | 0.3  | 0.7  | 774 | 4200 | 4900 | 9.30  | 0.2936 | 0.3064 | 0.6936 | 0.7064 | 862 | 4148 | 4989 | 939 | 4250 | 4811 | 11.28 | 31.05 |
| 10000 | 0.87 | 0.3  | 0.7  | 783 | 4200 | 4900 | 7.98  | 0.2936 | 0.3064 | 0.6936 | 0.7064 | 862 | 4148 | 4989 | 939 | 4250 | 4811 | 9.53  | 27.98 |
| 10000 | 0.88 | 0.3  | 0.7  | 792 | 4200 | 4900 | 6.76  | 0.2936 | 0.3064 | 0.6936 | 0.7064 | 862 | 4148 | 4989 | 939 | 4250 | 4811 | 7.97  | 25.09 |
| 10000 | 0.89 | 0.3  | 0.7  | 801 | 4200 | 4900 | 5.65  | 0.2936 | 0.3064 | 0.6936 | 0.7064 | 862 | 4148 | 4989 | 939 | 4250 | 4811 | 6.60  | 22.36 |
| 10000 | 0.90 | 0.3  | 0.7  | 810 | 4200 | 4900 | 4.64  | 0.2936 | 0.3064 | 0.6936 | 0.7064 | 862 | 4148 | 4989 | 939 | 4250 | 4811 | 5.41  | 19.81 |
| 10000 | 0.91 | 0.3  | 0.7  | 819 | 4200 | 4900 | 3.74  | 0.2936 | 0.3064 | 0.6936 | 0.7064 | 862 | 4148 | 4989 | 939 | 4250 | 4811 | 4.42  | 17.44 |
| 10000 | 0.92 | 0.3  | 0.7  | 828 | 4200 | 4900 | 2.94  | 0.2936 | 0.3064 | 0.6936 | 0.7064 | 862 | 4148 | 4989 | 939 | 4250 | 4811 | 3.61  | 15.23 |
| 10000 | 0.93 | 0.3  | 0.7  | 837 | 4200 | 4900 | 2.24  | 0.2936 | 0.3064 | 0.6936 | 0.7064 | 862 | 4148 | 4989 | 939 | 4250 | 4811 | 2.98  | 13.20 |
| 10000 | 0.94 | 0.3  | 0.7  | 846 | 4200 | 4900 | 1.64  | 0.2936 | 0.3064 | 0.6936 | 0.7064 | 862 | 4148 | 4989 | 939 | 4250 | 4811 | 2.55  | 11.34 |
| 10000 | 0.95 | 0.3  | 0.7  | 855 | 4200 | 4900 | 1.13  | 0.2936 | 0.3064 | 0.6936 | 0.7064 | 862 | 4148 | 4989 | 939 | 4250 | 4811 | 2.30  | 9.65  |
| 10000 | 0.96 | 0.3  | 0.7  | 864 | 4200 | 4900 | 0.72  | 0.2936 | 0.3064 | 0.6936 | 0.7064 | 862 | 4148 | 4989 | 939 | 4250 | 4811 | 2.24  | 8.13  |

|       |      |      |      |      |      |      |       |        |        |        |        |      |      |      |      |      |      |       |       |
|-------|------|------|------|------|------|------|-------|--------|--------|--------|--------|------|------|------|------|------|------|-------|-------|
| 10000 | 0.97 | 0.3  | 0.7  | 873  | 4200 | 4900 | 0.40  | 0.2936 | 0.3064 | 0.6936 | 0.7064 | 862  | 4148 | 4989 | 939  | 4250 | 4811 | 2.37  | 6.79  |
| 10000 | 0.98 | 0.3  | 0.7  | 882  | 4200 | 4900 | 0.18  | 0.2936 | 0.3064 | 0.6936 | 0.7064 | 862  | 4148 | 4989 | 939  | 4250 | 4811 | 2.69  | 5.62  |
| 10000 | 0.99 | 0.3  | 0.7  | 891  | 4200 | 4900 | 0.04  | 0.2936 | 0.3064 | 0.6936 | 0.7064 | 862  | 4148 | 4989 | 939  | 4250 | 4811 | 3.20  | 4.62  |
| 10000 | 1.00 | 0.3  | 0.7  | 900  | 4200 | 4900 | 0.00  | 0.2936 | 0.3064 | 0.6936 | 0.7064 | 862  | 4148 | 4989 | 939  | 4250 | 4811 | 3.89  | 3.80  |
| 10000 | 1.01 | 0.3  | 0.7  | 909  | 4200 | 4900 | 0.04  | 0.2936 | 0.3064 | 0.6936 | 0.7064 | 862  | 4148 | 4989 | 939  | 4250 | 4811 | 4.77  | 3.14  |
| 10000 | 1.02 | 0.3  | 0.7  | 918  | 4200 | 4900 | 0.17  | 0.2936 | 0.3064 | 0.6936 | 0.7064 | 862  | 4148 | 4989 | 939  | 4250 | 4811 | 5.84  | 2.66  |
| 10000 | 1.03 | 0.3  | 0.7  | 927  | 4200 | 4900 | 0.39  | 0.2936 | 0.3064 | 0.6936 | 0.7064 | 862  | 4148 | 4989 | 939  | 4250 | 4811 | 7.10  | 2.36  |
| 10000 | 1.04 | 0.3  | 0.7  | 936  | 4200 | 4900 | 0.69  | 0.2936 | 0.3064 | 0.6936 | 0.7064 | 862  | 4148 | 4989 | 939  | 4250 | 4811 | 8.54  | 2.22  |
| 10000 | 1.05 | 0.3  | 0.7  | 945  | 4200 | 4900 | 1.07  | 0.2936 | 0.3064 | 0.6936 | 0.7064 | 862  | 4148 | 4989 | 939  | 4250 | 4811 | 10.17 | 2.26  |
| 10000 | 1.06 | 0.3  | 0.7  | 954  | 4200 | 4900 | 1.54  | 0.2936 | 0.3064 | 0.6936 | 0.7064 | 862  | 4148 | 4989 | 939  | 4250 | 4811 | 11.99 | 2.47  |
| 10000 | 1.07 | 0.3  | 0.7  | 963  | 4200 | 4900 | 2.09  | 0.2936 | 0.3064 | 0.6936 | 0.7064 | 862  | 4148 | 4989 | 939  | 4250 | 4811 | 14.00 | 2.86  |
| 10000 | 1.08 | 0.3  | 0.7  | 972  | 4200 | 4900 | 2.71  | 0.2936 | 0.3064 | 0.6936 | 0.7064 | 862  | 4148 | 4989 | 939  | 4250 | 4811 | 16.20 | 3.41  |
| 10000 | 1.09 | 0.3  | 0.7  | 981  | 4200 | 4900 | 3.41  | 0.2936 | 0.3064 | 0.6936 | 0.7064 | 862  | 4148 | 4989 | 939  | 4250 | 4811 | 18.58 | 4.14  |
| 10000 | 1.10 | 0.3  | 0.7  | 990  | 4200 | 4900 | 4.19  | 0.2936 | 0.3064 | 0.6936 | 0.7064 | 862  | 4148 | 4989 | 939  | 4250 | 4811 | 21.15 | 5.04  |
| 10000 | 1.11 | 0.3  | 0.7  | 999  | 4200 | 4900 | 5.05  | 0.2936 | 0.3064 | 0.6936 | 0.7064 | 862  | 4148 | 4989 | 939  | 4250 | 4811 | 23.91 | 6.12  |
| 10000 | 1.12 | 0.3  | 0.7  | 1008 | 4200 | 4900 | 5.98  | 0.2936 | 0.3064 | 0.6936 | 0.7064 | 862  | 4148 | 4989 | 939  | 4250 | 4811 | 26.86 | 7.36  |
| 10000 | 1.13 | 0.3  | 0.7  | 1017 | 4200 | 4900 | 6.98  | 0.2936 | 0.3064 | 0.6936 | 0.7064 | 862  | 4148 | 4989 | 939  | 4250 | 4811 | 30.00 | 8.78  |
| 10000 | 1.14 | 0.3  | 0.7  | 1026 | 4200 | 4900 | 8.06  | 0.2936 | 0.3064 | 0.6936 | 0.7064 | 862  | 4148 | 4989 | 939  | 4250 | 4811 | 33.32 | 10.37 |
| 10000 | 1.15 | 0.3  | 0.7  | 1035 | 4200 | 4900 | 9.21  | 0.2936 | 0.3064 | 0.6936 | 0.7064 | 862  | 4148 | 4989 | 939  | 4250 | 4811 | 36.83 | 12.14 |
| 10000 | 1.16 | 0.3  | 0.7  | 1044 | 4200 | 4900 | 10.43 | 0.2936 | 0.3064 | 0.6936 | 0.7064 | 862  | 4148 | 4989 | 939  | 4250 | 4811 | 40.53 | 14.07 |
| 10000 | 1.17 | 0.3  | 0.7  | 1053 | 4200 | 4900 | 11.71 | 0.2936 | 0.3064 | 0.6936 | 0.7064 | 862  | 4148 | 4989 | 939  | 4250 | 4811 | 44.42 | 16.18 |
| 10000 | 1.18 | 0.3  | 0.7  | 1062 | 4200 | 4900 | 13.07 | 0.2936 | 0.3064 | 0.6936 | 0.7064 | 862  | 4148 | 4989 | 939  | 4250 | 4811 | 48.49 | 18.47 |
| 10000 | 1.19 | 0.3  | 0.7  | 1071 | 4200 | 4900 | 14.49 | 0.2936 | 0.3064 | 0.6936 | 0.7064 | 862  | 4148 | 4989 | 939  | 4250 | 4811 | 52.75 | 20.92 |
| 10000 | 1.20 | 0.3  | 0.7  | 1080 | 4200 | 4900 | 15.98 | 0.2936 | 0.3064 | 0.6936 | 0.7064 | 862  | 4148 | 4989 | 939  | 4250 | 4811 | 57.20 | 23.55 |
| 10000 | 0.80 | 0.35 | 0.65 | 980  | 4550 | 4225 | 23.35 | 0.3434 | 0.3566 | 0.6434 | 0.6566 | 1179 | 4509 | 4311 | 1272 | 4589 | 4140 | 35.73 | 69.01 |
| 10000 | 0.81 | 0.35 | 0.65 | 992  | 4550 | 4225 | 20.94 | 0.3434 | 0.3566 | 0.6434 | 0.6566 | 1179 | 4509 | 4311 | 1272 | 4589 | 4140 | 31.72 | 63.51 |
| 10000 | 0.82 | 0.35 | 0.65 | 1005 | 4550 | 4225 | 18.68 | 0.3434 | 0.3566 | 0.6434 | 0.6566 | 1179 | 4509 | 4311 | 1272 | 4589 | 4140 | 27.97 | 58.24 |
| 10000 | 0.83 | 0.35 | 0.65 | 1017 | 4550 | 4225 | 16.56 | 0.3434 | 0.3566 | 0.6434 | 0.6566 | 1179 | 4509 | 4311 | 1272 | 4589 | 4140 | 24.47 | 53.21 |
| 10000 | 0.84 | 0.35 | 0.65 | 1029 | 4550 | 4225 | 14.58 | 0.3434 | 0.3566 | 0.6434 | 0.6566 | 1179 | 4509 | 4311 | 1272 | 4589 | 4140 | 21.22 | 48.42 |
| 10000 | 0.85 | 0.35 | 0.65 | 1041 | 4550 | 4225 | 12.73 | 0.3434 | 0.3566 | 0.6434 | 0.6566 | 1179 | 4509 | 4311 | 1272 | 4589 | 4140 | 18.23 | 43.86 |
| 10000 | 0.86 | 0.35 | 0.65 | 1054 | 4550 | 4225 | 11.02 | 0.3434 | 0.3566 | 0.6434 | 0.6566 | 1179 | 4509 | 4311 | 1272 | 4589 | 4140 | 15.49 | 39.54 |
| 10000 | 0.87 | 0.35 | 0.65 | 1066 | 4550 | 4225 | 9.45  | 0.3434 | 0.3566 | 0.6434 | 0.6566 | 1179 | 4509 | 4311 | 1272 | 4589 | 4140 | 13.00 | 35.45 |
| 10000 | 0.88 | 0.35 | 0.65 | 1078 | 4550 | 4225 | 8.00  | 0.3434 | 0.3566 | 0.6434 | 0.6566 | 1179 | 4509 | 4311 | 1272 | 4589 | 4140 | 10.77 | 31.60 |
| 10000 | 0.89 | 0.35 | 0.65 | 1090 | 4550 | 4225 | 6.68  | 0.3434 | 0.3566 | 0.6434 | 0.6566 | 1179 | 4509 | 4311 | 1272 | 4589 | 4140 | 8.80  | 27.99 |
| 10000 | 0.90 | 0.35 | 0.65 | 1103 | 4550 | 4225 | 5.49  | 0.3434 | 0.3566 | 0.6434 | 0.6566 | 1179 | 4509 | 4311 | 1272 | 4589 | 4140 | 7.08  | 24.61 |

|       |      |      |      |      |      |      |       |        |        |        |        |      |      |      |      |      |      |       |       |
|-------|------|------|------|------|------|------|-------|--------|--------|--------|--------|------|------|------|------|------|------|-------|-------|
| 10000 | 0.91 | 0.35 | 0.65 | 1115 | 4550 | 4225 | 4.42  | 0.3434 | 0.3566 | 0.6434 | 0.6566 | 1179 | 4509 | 4311 | 1272 | 4589 | 4140 | 5.61  | 21.47 |
| 10000 | 0.92 | 0.35 | 0.65 | 1127 | 4550 | 4225 | 3.47  | 0.3434 | 0.3566 | 0.6434 | 0.6566 | 1179 | 4509 | 4311 | 1272 | 4589 | 4140 | 4.40  | 18.56 |
| 10000 | 0.93 | 0.35 | 0.65 | 1139 | 4550 | 4225 | 2.64  | 0.3434 | 0.3566 | 0.6434 | 0.6566 | 1179 | 4509 | 4311 | 1272 | 4589 | 4140 | 3.45  | 15.89 |
| 10000 | 0.94 | 0.35 | 0.65 | 1152 | 4550 | 4225 | 1.93  | 0.3434 | 0.3566 | 0.6434 | 0.6566 | 1179 | 4509 | 4311 | 1272 | 4589 | 4140 | 2.74  | 13.46 |
| 10000 | 0.95 | 0.35 | 0.65 | 1164 | 4550 | 4225 | 1.33  | 0.3434 | 0.3566 | 0.6434 | 0.6566 | 1179 | 4509 | 4311 | 1272 | 4589 | 4140 | 2.30  | 11.26 |
| 10000 | 0.96 | 0.35 | 0.65 | 1176 | 4550 | 4225 | 0.85  | 0.3434 | 0.3566 | 0.6434 | 0.6566 | 1179 | 4509 | 4311 | 1272 | 4589 | 4140 | 2.10  | 9.30  |
| 10000 | 0.97 | 0.35 | 0.65 | 1188 | 4550 | 4225 | 0.47  | 0.3434 | 0.3566 | 0.6434 | 0.6566 | 1179 | 4509 | 4311 | 1272 | 4589 | 4140 | 2.16  | 7.57  |
| 10000 | 0.98 | 0.35 | 0.65 | 1201 | 4550 | 4225 | 0.21  | 0.3434 | 0.3566 | 0.6434 | 0.6566 | 1179 | 4509 | 4311 | 1272 | 4589 | 4140 | 2.48  | 6.08  |
| 10000 | 0.99 | 0.35 | 0.65 | 1213 | 4550 | 4225 | 0.05  | 0.3434 | 0.3566 | 0.6434 | 0.6566 | 1179 | 4509 | 4311 | 1272 | 4589 | 4140 | 3.05  | 4.83  |
| 10000 | 1.00 | 0.35 | 0.65 | 1225 | 4550 | 4225 | 0.00  | 0.3434 | 0.3566 | 0.6434 | 0.6566 | 1179 | 4509 | 4311 | 1272 | 4589 | 4140 | 3.88  | 3.81  |
| 10000 | 1.01 | 0.35 | 0.65 | 1237 | 4550 | 4225 | 0.05  | 0.3434 | 0.3566 | 0.6434 | 0.6566 | 1179 | 4509 | 4311 | 1272 | 4589 | 4140 | 4.96  | 3.03  |
| 10000 | 1.02 | 0.35 | 0.65 | 1250 | 4550 | 4225 | 0.20  | 0.3434 | 0.3566 | 0.6434 | 0.6566 | 1179 | 4509 | 4311 | 1272 | 4589 | 4140 | 6.29  | 2.48  |
| 10000 | 1.03 | 0.35 | 0.65 | 1262 | 4550 | 4225 | 0.46  | 0.3434 | 0.3566 | 0.6434 | 0.6566 | 1179 | 4509 | 4311 | 1272 | 4589 | 4140 | 7.88  | 2.17  |
| 10000 | 1.04 | 0.35 | 0.65 | 1274 | 4550 | 4225 | 0.81  | 0.3434 | 0.3566 | 0.6434 | 0.6566 | 1179 | 4509 | 4311 | 1272 | 4589 | 4140 | 9.72  | 2.10  |
| 10000 | 1.05 | 0.35 | 0.65 | 1286 | 4550 | 4225 | 1.26  | 0.3434 | 0.3566 | 0.6434 | 0.6566 | 1179 | 4509 | 4311 | 1272 | 4589 | 4140 | 11.82 | 2.26  |
| 10000 | 1.06 | 0.35 | 0.65 | 1299 | 4550 | 4225 | 1.80  | 0.3434 | 0.3566 | 0.6434 | 0.6566 | 1179 | 4509 | 4311 | 1272 | 4589 | 4140 | 14.17 | 2.66  |
| 10000 | 1.07 | 0.35 | 0.65 | 1311 | 4550 | 4225 | 2.44  | 0.3434 | 0.3566 | 0.6434 | 0.6566 | 1179 | 4509 | 4311 | 1272 | 4589 | 4140 | 16.78 | 3.29  |
| 10000 | 1.08 | 0.35 | 0.65 | 1323 | 4550 | 4225 | 3.17  | 0.3434 | 0.3566 | 0.6434 | 0.6566 | 1179 | 4509 | 4311 | 1272 | 4589 | 4140 | 19.64 | 4.16  |
| 10000 | 1.09 | 0.35 | 0.65 | 1335 | 4550 | 4225 | 3.98  | 0.3434 | 0.3566 | 0.6434 | 0.6566 | 1179 | 4509 | 4311 | 1272 | 4589 | 4140 | 22.76 | 5.27  |
| 10000 | 1.10 | 0.35 | 0.65 | 1348 | 4550 | 4225 | 4.89  | 0.3434 | 0.3566 | 0.6434 | 0.6566 | 1179 | 4509 | 4311 | 1272 | 4589 | 4140 | 26.13 | 6.61  |
| 10000 | 1.11 | 0.35 | 0.65 | 1360 | 4550 | 4225 | 5.89  | 0.3434 | 0.3566 | 0.6434 | 0.6566 | 1179 | 4509 | 4311 | 1272 | 4589 | 4140 | 29.75 | 8.19  |
| 10000 | 1.12 | 0.35 | 0.65 | 1372 | 4550 | 4225 | 6.97  | 0.3434 | 0.3566 | 0.6434 | 0.6566 | 1179 | 4509 | 4311 | 1272 | 4589 | 4140 | 33.63 | 10.00 |
| 10000 | 1.13 | 0.35 | 0.65 | 1384 | 4550 | 4225 | 8.13  | 0.3434 | 0.3566 | 0.6434 | 0.6566 | 1179 | 4509 | 4311 | 1272 | 4589 | 4140 | 37.76 | 12.05 |
| 10000 | 1.14 | 0.35 | 0.65 | 1397 | 4550 | 4225 | 9.38  | 0.3434 | 0.3566 | 0.6434 | 0.6566 | 1179 | 4509 | 4311 | 1272 | 4589 | 4140 | 42.15 | 14.34 |
| 10000 | 1.15 | 0.35 | 0.65 | 1409 | 4550 | 4225 | 10.71 | 0.3434 | 0.3566 | 0.6434 | 0.6566 | 1179 | 4509 | 4311 | 1272 | 4589 | 4140 | 46.80 | 16.86 |
| 10000 | 1.16 | 0.35 | 0.65 | 1421 | 4550 | 4225 | 12.11 | 0.3434 | 0.3566 | 0.6434 | 0.6566 | 1179 | 4509 | 4311 | 1272 | 4589 | 4140 | 51.69 | 19.62 |
| 10000 | 1.17 | 0.35 | 0.65 | 1433 | 4550 | 4225 | 13.60 | 0.3434 | 0.3566 | 0.6434 | 0.6566 | 1179 | 4509 | 4311 | 1272 | 4589 | 4140 | 56.85 | 22.61 |
| 10000 | 1.18 | 0.35 | 0.65 | 1446 | 4550 | 4225 | 15.17 | 0.3434 | 0.3566 | 0.6434 | 0.6566 | 1179 | 4509 | 4311 | 1272 | 4589 | 4140 | 62.25 | 25.84 |
| 10000 | 1.19 | 0.35 | 0.65 | 1458 | 4550 | 4225 | 16.81 | 0.3434 | 0.3566 | 0.6434 | 0.6566 | 1179 | 4509 | 4311 | 1272 | 4589 | 4140 | 67.91 | 29.31 |
| 10000 | 1.20 | 0.35 | 0.65 | 1470 | 4550 | 4225 | 18.53 | 0.3434 | 0.3566 | 0.6434 | 0.6566 | 1179 | 4509 | 4311 | 1272 | 4589 | 4140 | 73.83 | 33.01 |
| 10000 | 0.80 | 0.4  | 0.6  | 1280 | 4800 | 3600 | 26.35 | 0.3932 | 0.4068 | 0.5932 | 0.6068 | 1546 | 4772 | 3682 | 1655 | 4826 | 3519 | 47.80 | 86.89 |
| 10000 | 0.81 | 0.4  | 0.6  | 1296 | 4800 | 3600 | 23.61 | 0.3932 | 0.4068 | 0.5932 | 0.6068 | 1546 | 4772 | 3682 | 1655 | 4826 | 3519 | 42.46 | 79.80 |
| 10000 | 0.82 | 0.4  | 0.6  | 1312 | 4800 | 3600 | 21.05 | 0.3932 | 0.4068 | 0.5932 | 0.6068 | 1546 | 4772 | 3682 | 1655 | 4826 | 3519 | 37.45 | 73.01 |
| 10000 | 0.83 | 0.4  | 0.6  | 1328 | 4800 | 3600 | 18.64 | 0.3932 | 0.4068 | 0.5932 | 0.6068 | 1546 | 4772 | 3682 | 1655 | 4826 | 3519 | 32.77 | 66.54 |
| 10000 | 0.84 | 0.4  | 0.6  | 1344 | 4800 | 3600 | 16.40 | 0.3932 | 0.4068 | 0.5932 | 0.6068 | 1546 | 4772 | 3682 | 1655 | 4826 | 3519 | 28.42 | 60.37 |



|       |      |     |     |      |      |      |       |        |        |        |        |      |      |      |      |      |      |       |       |
|-------|------|-----|-----|------|------|------|-------|--------|--------|--------|--------|------|------|------|------|------|------|-------|-------|
| 10000 | 0.85 | 0.4 | 0.6 | 1360 | 4800 | 3600 | 14.32 | 0.3932 | 0.4068 | 0.5932 | 0.6068 | 1546 | 4772 | 3682 | 1655 | 4826 | 3519 | 24.40 | 54.52 |
| 10000 | 0.86 | 0.4 | 0.6 | 1376 | 4800 | 3600 | 12.38 | 0.3932 | 0.4068 | 0.5932 | 0.6068 | 1546 | 4772 | 3682 | 1655 | 4826 | 3519 | 20.71 | 48.97 |
| 10000 | 0.87 | 0.4 | 0.6 | 1392 | 4800 | 3600 | 10.61 | 0.3932 | 0.4068 | 0.5932 | 0.6068 | 1546 | 4772 | 3682 | 1655 | 4826 | 3519 | 17.36 | 43.74 |
| 10000 | 0.88 | 0.4 | 0.6 | 1408 | 4800 | 3600 | 8.98  | 0.3932 | 0.4068 | 0.5932 | 0.6068 | 1546 | 4772 | 3682 | 1655 | 4826 | 3519 | 14.33 | 38.81 |
| 10000 | 0.89 | 0.4 | 0.6 | 1424 | 4800 | 3600 | 7.49  | 0.3932 | 0.4068 | 0.5932 | 0.6068 | 1546 | 4772 | 3682 | 1655 | 4826 | 3519 | 11.64 | 34.19 |
| 10000 | 0.90 | 0.4 | 0.6 | 1440 | 4800 | 3600 | 6.15  | 0.3932 | 0.4068 | 0.5932 | 0.6068 | 1546 | 4772 | 3682 | 1655 | 4826 | 3519 | 9.28  | 29.88 |
| 10000 | 0.91 | 0.4 | 0.6 | 1456 | 4800 | 3600 | 4.95  | 0.3932 | 0.4068 | 0.5932 | 0.6068 | 1546 | 4772 | 3682 | 1655 | 4826 | 3519 | 7.24  | 25.89 |
| 10000 | 0.92 | 0.4 | 0.6 | 1472 | 4800 | 3600 | 3.88  | 0.3932 | 0.4068 | 0.5932 | 0.6068 | 1546 | 4772 | 3682 | 1655 | 4826 | 3519 | 5.54  | 22.20 |
| 10000 | 0.93 | 0.4 | 0.6 | 1488 | 4800 | 3600 | 2.95  | 0.3932 | 0.4068 | 0.5932 | 0.6068 | 1546 | 4772 | 3682 | 1655 | 4826 | 3519 | 4.18  | 18.82 |
| 10000 | 0.94 | 0.4 | 0.6 | 1504 | 4800 | 3600 | 2.16  | 0.3932 | 0.4068 | 0.5932 | 0.6068 | 1546 | 4772 | 3682 | 1655 | 4826 | 3519 | 3.14  | 15.75 |
| 10000 | 0.95 | 0.4 | 0.6 | 1520 | 4800 | 3600 | 1.49  | 0.3932 | 0.4068 | 0.5932 | 0.6068 | 1546 | 4772 | 3682 | 1655 | 4826 | 3519 | 2.43  | 12.99 |
| 10000 | 0.96 | 0.4 | 0.6 | 1536 | 4800 | 3600 | 0.95  | 0.3932 | 0.4068 | 0.5932 | 0.6068 | 1546 | 4772 | 3682 | 1655 | 4826 | 3519 | 2.06  | 10.53 |
| 10000 | 0.97 | 0.4 | 0.6 | 1552 | 4800 | 3600 | 0.53  | 0.3932 | 0.4068 | 0.5932 | 0.6068 | 1546 | 4772 | 3682 | 1655 | 4826 | 3519 | 2.01  | 8.39  |
| 10000 | 0.98 | 0.4 | 0.6 | 1568 | 4800 | 3600 | 0.23  | 0.3932 | 0.4068 | 0.5932 | 0.6068 | 1546 | 4772 | 3682 | 1655 | 4826 | 3519 | 2.30  | 6.56  |
| 10000 | 0.99 | 0.4 | 0.6 | 1584 | 4800 | 3600 | 0.06  | 0.3932 | 0.4068 | 0.5932 | 0.6068 | 1546 | 4772 | 3682 | 1655 | 4826 | 3519 | 2.92  | 5.04  |
| 10000 | 1.00 | 0.4 | 0.6 | 1600 | 4800 | 3600 | 0.00  | 0.3932 | 0.4068 | 0.5932 | 0.6068 | 1546 | 4772 | 3682 | 1655 | 4826 | 3519 | 3.86  | 3.82  |
| 10000 | 1.01 | 0.4 | 0.6 | 1616 | 4800 | 3600 | 0.06  | 0.3932 | 0.4068 | 0.5932 | 0.6068 | 1546 | 4772 | 3682 | 1655 | 4826 | 3519 | 5.14  | 2.92  |
| 10000 | 1.02 | 0.4 | 0.6 | 1632 | 4800 | 3600 | 0.23  | 0.3932 | 0.4068 | 0.5932 | 0.6068 | 1546 | 4772 | 3682 | 1655 | 4826 | 3519 | 6.76  | 2.32  |
| 10000 | 1.03 | 0.4 | 0.6 | 1648 | 4800 | 3600 | 0.51  | 0.3932 | 0.4068 | 0.5932 | 0.6068 | 1546 | 4772 | 3682 | 1655 | 4826 | 3519 | 8.70  | 2.04  |
| 10000 | 1.04 | 0.4 | 0.6 | 1664 | 4800 | 3600 | 0.90  | 0.3932 | 0.4068 | 0.5932 | 0.6068 | 1546 | 4772 | 3682 | 1655 | 4826 | 3519 | 10.97 | 2.06  |
| 10000 | 1.05 | 0.4 | 0.6 | 1680 | 4800 | 3600 | 1.40  | 0.3932 | 0.4068 | 0.5932 | 0.6068 | 1546 | 4772 | 3682 | 1655 | 4826 | 3519 | 13.58 | 2.39  |
| 10000 | 1.06 | 0.4 | 0.6 | 1696 | 4800 | 3600 | 2.00  | 0.3932 | 0.4068 | 0.5932 | 0.6068 | 1546 | 4772 | 3682 | 1655 | 4826 | 3519 | 16.51 | 3.03  |
| 10000 | 1.07 | 0.4 | 0.6 | 1712 | 4800 | 3600 | 2.70  | 0.3932 | 0.4068 | 0.5932 | 0.6068 | 1546 | 4772 | 3682 | 1655 | 4826 | 3519 | 19.78 | 3.99  |
| 10000 | 1.08 | 0.4 | 0.6 | 1728 | 4800 | 3600 | 3.51  | 0.3932 | 0.4068 | 0.5932 | 0.6068 | 1546 | 4772 | 3682 | 1655 | 4826 | 3519 | 23.38 | 5.25  |
| 10000 | 1.09 | 0.4 | 0.6 | 1744 | 4800 | 3600 | 4.41  | 0.3932 | 0.4068 | 0.5932 | 0.6068 | 1546 | 4772 | 3682 | 1655 | 4826 | 3519 | 27.31 | 6.82  |
| 10000 | 1.10 | 0.4 | 0.6 | 1760 | 4800 | 3600 | 5.41  | 0.3932 | 0.4068 | 0.5932 | 0.6068 | 1546 | 4772 | 3682 | 1655 | 4826 | 3519 | 31.57 | 8.70  |
| 10000 | 1.11 | 0.4 | 0.6 | 1776 | 4800 | 3600 | 6.51  | 0.3932 | 0.4068 | 0.5932 | 0.6068 | 1546 | 4772 | 3682 | 1655 | 4826 | 3519 | 36.16 | 10.89 |
| 10000 | 1.12 | 0.4 | 0.6 | 1792 | 4800 | 3600 | 7.70  | 0.3932 | 0.4068 | 0.5932 | 0.6068 | 1546 | 4772 | 3682 | 1655 | 4826 | 3519 | 41.08 | 13.39 |
| 10000 | 1.13 | 0.4 | 0.6 | 1808 | 4800 | 3600 | 8.98  | 0.3932 | 0.4068 | 0.5932 | 0.6068 | 1546 | 4772 | 3682 | 1655 | 4826 | 3519 | 46.34 | 16.20 |
| 10000 | 1.14 | 0.4 | 0.6 | 1824 | 4800 | 3600 | 10.35 | 0.3932 | 0.4068 | 0.5932 | 0.6068 | 1546 | 4772 | 3682 | 1655 | 4826 | 3519 | 51.92 | 19.31 |
| 10000 | 1.15 | 0.4 | 0.6 | 1840 | 4800 | 3600 | 11.81 | 0.3932 | 0.4068 | 0.5932 | 0.6068 | 1546 | 4772 | 3682 | 1655 | 4826 | 3519 | 57.84 | 22.74 |
| 10000 | 1.16 | 0.4 | 0.6 | 1856 | 4800 | 3600 | 13.36 | 0.3932 | 0.4068 | 0.5932 | 0.6068 | 1546 | 4772 | 3682 | 1655 | 4826 | 3519 | 64.09 | 26.48 |
| 10000 | 1.17 | 0.4 | 0.6 | 1872 | 4800 | 3600 | 14.99 | 0.3932 | 0.4068 | 0.5932 | 0.6068 | 1546 | 4772 | 3682 | 1655 | 4826 | 3519 | 70.66 | 30.52 |
| 10000 | 1.18 | 0.4 | 0.6 | 1888 | 4800 | 3600 | 16.71 | 0.3932 | 0.4068 | 0.5932 | 0.6068 | 1546 | 4772 | 3682 | 1655 | 4826 | 3519 | 77.57 | 34.88 |
| 10000 | 1.19 | 0.4 | 0.6 | 1904 | 4800 | 3600 | 18.51 | 0.3932 | 0.4068 | 0.5932 | 0.6068 | 1546 | 4772 | 3682 | 1655 | 4826 | 3519 | 84.81 | 39.54 |

|       |      |      |      |      |      |      |       |        |        |        |        |      |      |      |      |      |      |       |        |
|-------|------|------|------|------|------|------|-------|--------|--------|--------|--------|------|------|------|------|------|------|-------|--------|
| 10000 | 1.20 | 0.4  | 0.6  | 1920 | 4800 | 3600 | 20.39 | 0.3932 | 0.4068 | 0.5932 | 0.6068 | 1546 | 4772 | 3682 | 1655 | 4826 | 3519 | 92.39 | 44.52  |
| 10000 | 0.80 | 0.45 | 0.55 | 1620 | 4950 | 3025 | 28.39 | 0.4431 | 0.4569 | 0.5431 | 0.5569 | 1963 | 4935 | 3101 | 2088 | 4963 | 2950 | 61.99 | 106.67 |
| 10000 | 0.81 | 0.45 | 0.55 | 1640 | 4950 | 3025 | 25.42 | 0.4431 | 0.4569 | 0.5431 | 0.5569 | 1963 | 4935 | 3101 | 2088 | 4963 | 2950 | 55.11 | 97.79  |
| 10000 | 0.82 | 0.45 | 0.55 | 1661 | 4950 | 3025 | 22.64 | 0.4431 | 0.4569 | 0.5431 | 0.5569 | 1963 | 4935 | 3101 | 2088 | 4963 | 2950 | 48.66 | 89.31  |
| 10000 | 0.83 | 0.45 | 0.55 | 1681 | 4950 | 3025 | 20.04 | 0.4431 | 0.4569 | 0.5431 | 0.5569 | 1963 | 4935 | 3101 | 2088 | 4963 | 2950 | 42.62 | 81.22  |
| 10000 | 0.84 | 0.45 | 0.55 | 1701 | 4950 | 3025 | 17.62 | 0.4431 | 0.4569 | 0.5431 | 0.5569 | 1963 | 4935 | 3101 | 2088 | 4963 | 2950 | 37.00 | 73.53  |
| 10000 | 0.85 | 0.45 | 0.55 | 1721 | 4950 | 3025 | 15.37 | 0.4431 | 0.4569 | 0.5431 | 0.5569 | 1963 | 4935 | 3101 | 2088 | 4963 | 2950 | 31.79 | 66.23  |
| 10000 | 0.86 | 0.45 | 0.55 | 1742 | 4950 | 3025 | 13.29 | 0.4431 | 0.4569 | 0.5431 | 0.5569 | 1963 | 4935 | 3101 | 2088 | 4963 | 2950 | 27.01 | 59.32  |
| 10000 | 0.87 | 0.45 | 0.55 | 1762 | 4950 | 3025 | 11.37 | 0.4431 | 0.4569 | 0.5431 | 0.5569 | 1963 | 4935 | 3101 | 2088 | 4963 | 2950 | 22.64 | 52.80  |
| 10000 | 0.88 | 0.45 | 0.55 | 1782 | 4950 | 3025 | 9.62  | 0.4431 | 0.4569 | 0.5431 | 0.5569 | 1963 | 4935 | 3101 | 2088 | 4963 | 2950 | 18.69 | 46.68  |
| 10000 | 0.89 | 0.45 | 0.55 | 1802 | 4950 | 3025 | 8.02  | 0.4431 | 0.4569 | 0.5431 | 0.5569 | 1963 | 4935 | 3101 | 2088 | 4963 | 2950 | 15.15 | 40.95  |
| 10000 | 0.90 | 0.45 | 0.55 | 1823 | 4950 | 3025 | 6.58  | 0.4431 | 0.4569 | 0.5431 | 0.5569 | 1963 | 4935 | 3101 | 2088 | 4963 | 2950 | 12.04 | 35.61  |
| 10000 | 0.91 | 0.45 | 0.55 | 1843 | 4950 | 3025 | 5.29  | 0.4431 | 0.4569 | 0.5431 | 0.5569 | 1963 | 4935 | 3101 | 2088 | 4963 | 2950 | 9.34  | 30.66  |
| 10000 | 0.92 | 0.45 | 0.55 | 1863 | 4950 | 3025 | 4.15  | 0.4431 | 0.4569 | 0.5431 | 0.5569 | 1963 | 4935 | 3101 | 2088 | 4963 | 2950 | 7.06  | 26.11  |
| 10000 | 0.93 | 0.45 | 0.55 | 1883 | 4950 | 3025 | 3.15  | 0.4431 | 0.4569 | 0.5431 | 0.5569 | 1963 | 4935 | 3101 | 2088 | 4963 | 2950 | 5.20  | 21.95  |
| 10000 | 0.94 | 0.45 | 0.55 | 1904 | 4950 | 3025 | 2.30  | 0.4431 | 0.4569 | 0.5431 | 0.5569 | 1963 | 4935 | 3101 | 2088 | 4963 | 2950 | 3.75  | 18.18  |
| 10000 | 0.95 | 0.45 | 0.55 | 1924 | 4950 | 3025 | 1.59  | 0.4431 | 0.4569 | 0.5431 | 0.5569 | 1963 | 4935 | 3101 | 2088 | 4963 | 2950 | 2.72  | 14.81  |
| 10000 | 0.96 | 0.45 | 0.55 | 1944 | 4950 | 3025 | 1.01  | 0.4431 | 0.4569 | 0.5431 | 0.5569 | 1963 | 4935 | 3101 | 2088 | 4963 | 2950 | 2.11  | 11.83  |
| 10000 | 0.97 | 0.45 | 0.55 | 1964 | 4950 | 3025 | 0.56  | 0.4431 | 0.4569 | 0.5431 | 0.5569 | 1963 | 4935 | 3101 | 2088 | 4963 | 2950 | 1.92  | 9.24   |
| 10000 | 0.98 | 0.45 | 0.55 | 1985 | 4950 | 3025 | 0.25  | 0.4431 | 0.4569 | 0.5431 | 0.5569 | 1963 | 4935 | 3101 | 2088 | 4963 | 2950 | 2.15  | 7.04   |
| 10000 | 0.99 | 0.45 | 0.55 | 2005 | 4950 | 3025 | 0.06  | 0.4431 | 0.4569 | 0.5431 | 0.5569 | 1963 | 4935 | 3101 | 2088 | 4963 | 2950 | 2.79  | 5.24   |
| 10000 | 1.00 | 0.45 | 0.55 | 2025 | 4950 | 3025 | 0.00  | 0.4431 | 0.4569 | 0.5431 | 0.5569 | 1963 | 4935 | 3101 | 2088 | 4963 | 2950 | 3.85  | 3.83   |
| 10000 | 1.01 | 0.45 | 0.55 | 2045 | 4950 | 3025 | 0.06  | 0.4431 | 0.4569 | 0.5431 | 0.5569 | 1963 | 4935 | 3101 | 2088 | 4963 | 2950 | 5.33  | 2.82   |
| 10000 | 1.02 | 0.45 | 0.55 | 2066 | 4950 | 3025 | 0.24  | 0.4431 | 0.4569 | 0.5431 | 0.5569 | 1963 | 4935 | 3101 | 2088 | 4963 | 2950 | 7.23  | 2.19   |
| 10000 | 1.03 | 0.45 | 0.55 | 2086 | 4950 | 3025 | 0.54  | 0.4431 | 0.4569 | 0.5431 | 0.5569 | 1963 | 4935 | 3101 | 2088 | 4963 | 2950 | 9.54  | 1.96   |
| 10000 | 1.04 | 0.45 | 0.55 | 2106 | 4950 | 3025 | 0.95  | 0.4431 | 0.4569 | 0.5431 | 0.5569 | 1963 | 4935 | 3101 | 2088 | 4963 | 2950 | 12.28 | 2.12   |
| 10000 | 1.05 | 0.45 | 0.55 | 2126 | 4950 | 3025 | 1.48  | 0.4431 | 0.4569 | 0.5431 | 0.5569 | 1963 | 4935 | 3101 | 2088 | 4963 | 2950 | 15.43 | 2.68   |
| 10000 | 1.06 | 0.45 | 0.55 | 2147 | 4950 | 3025 | 2.12  | 0.4431 | 0.4569 | 0.5431 | 0.5569 | 1963 | 4935 | 3101 | 2088 | 4963 | 2950 | 18.99 | 3.62   |
| 10000 | 1.07 | 0.45 | 0.55 | 2167 | 4950 | 3025 | 2.86  | 0.4431 | 0.4569 | 0.5431 | 0.5569 | 1963 | 4935 | 3101 | 2088 | 4963 | 2950 | 22.98 | 4.97   |
| 10000 | 1.08 | 0.45 | 0.55 | 2187 | 4950 | 3025 | 3.71  | 0.4431 | 0.4569 | 0.5431 | 0.5569 | 1963 | 4935 | 3101 | 2088 | 4963 | 2950 | 27.38 | 6.70   |
| 10000 | 1.09 | 0.45 | 0.55 | 2207 | 4950 | 3025 | 4.67  | 0.4431 | 0.4569 | 0.5431 | 0.5569 | 1963 | 4935 | 3101 | 2088 | 4963 | 2950 | 32.20 | 8.83   |
| 10000 | 1.10 | 0.45 | 0.55 | 2228 | 4950 | 3025 | 5.72  | 0.4431 | 0.4569 | 0.5431 | 0.5569 | 1963 | 4935 | 3101 | 2088 | 4963 | 2950 | 37.44 | 11.34  |
| 10000 | 1.11 | 0.45 | 0.55 | 2248 | 4950 | 3025 | 6.88  | 0.4431 | 0.4569 | 0.5431 | 0.5569 | 1963 | 4935 | 3101 | 2088 | 4963 | 2950 | 43.10 | 14.26  |
| 10000 | 1.12 | 0.45 | 0.55 | 2268 | 4950 | 3025 | 8.13  | 0.4431 | 0.4569 | 0.5431 | 0.5569 | 1963 | 4935 | 3101 | 2088 | 4963 | 2950 | 49.17 | 17.56  |
| 10000 | 1.13 | 0.45 | 0.55 | 2288 | 4950 | 3025 | 9.48  | 0.4431 | 0.4569 | 0.5431 | 0.5569 | 1963 | 4935 | 3101 | 2088 | 4963 | 2950 | 55.66 | 21.26  |

|       |      |      |      |      |      |      |       |        |        |        |        |      |      |      |      |      |      |        |        |
|-------|------|------|------|------|------|------|-------|--------|--------|--------|--------|------|------|------|------|------|------|--------|--------|
| 10000 | 1.14 | 0.45 | 0.55 | 2309 | 4950 | 3025 | 10.93 | 0.4431 | 0.4569 | 0.5431 | 0.5569 | 1963 | 4935 | 3101 | 2088 | 4963 | 2950 | 62.57  | 25.35  |
| 10000 | 1.15 | 0.45 | 0.55 | 2329 | 4950 | 3025 | 12.46 | 0.4431 | 0.4569 | 0.5431 | 0.5569 | 1963 | 4935 | 3101 | 2088 | 4963 | 2950 | 69.90  | 29.83  |
| 10000 | 1.16 | 0.45 | 0.55 | 2349 | 4950 | 3025 | 14.09 | 0.4431 | 0.4569 | 0.5431 | 0.5569 | 1963 | 4935 | 3101 | 2088 | 4963 | 2950 | 77.64  | 34.71  |
| 10000 | 1.17 | 0.45 | 0.55 | 2369 | 4950 | 3025 | 15.80 | 0.4431 | 0.4569 | 0.5431 | 0.5569 | 1963 | 4935 | 3101 | 2088 | 4963 | 2950 | 85.80  | 39.98  |
| 10000 | 1.18 | 0.45 | 0.55 | 2390 | 4950 | 3025 | 17.60 | 0.4431 | 0.4569 | 0.5431 | 0.5569 | 1963 | 4935 | 3101 | 2088 | 4963 | 2950 | 94.38  | 45.64  |
| 10000 | 1.19 | 0.45 | 0.55 | 2410 | 4950 | 3025 | 19.49 | 0.4431 | 0.4569 | 0.5431 | 0.5569 | 1963 | 4935 | 3101 | 2088 | 4963 | 2950 | 103.38 | 51.70  |
| 10000 | 1.20 | 0.45 | 0.55 | 2430 | 4950 | 3025 | 21.46 | 0.4431 | 0.4569 | 0.5431 | 0.5569 | 1963 | 4935 | 3101 | 2088 | 4963 | 2950 | 112.80 | 58.14  |
| 10000 | 0.80 | 0.5  | 0.5  | 2000 | 5000 | 2500 | 29.32 | 0.4931 | 0.5069 | 0.4931 | 0.5069 | 2431 | 4999 | 2570 | 2570 | 4999 | 2431 | 78.37  | 128.28 |
| 10000 | 0.81 | 0.5  | 0.5  | 2025 | 5000 | 2500 | 26.24 | 0.4931 | 0.5069 | 0.4931 | 0.5069 | 2431 | 4999 | 2570 | 2570 | 4999 | 2431 | 69.76  | 117.44 |
| 10000 | 0.82 | 0.5  | 0.5  | 2050 | 5000 | 2500 | 23.35 | 0.4931 | 0.5069 | 0.4931 | 0.5069 | 2431 | 4999 | 2570 | 2570 | 4999 | 2431 | 61.66  | 107.08 |
| 10000 | 0.83 | 0.5  | 0.5  | 2075 | 5000 | 2500 | 20.66 | 0.4931 | 0.5069 | 0.4931 | 0.5069 | 2431 | 4999 | 2570 | 2570 | 4999 | 2431 | 54.08  | 97.21  |
| 10000 | 0.84 | 0.5  | 0.5  | 2100 | 5000 | 2500 | 18.15 | 0.4931 | 0.5069 | 0.4931 | 0.5069 | 2431 | 4999 | 2570 | 2570 | 4999 | 2431 | 47.01  | 87.83  |
| 10000 | 0.85 | 0.5  | 0.5  | 2125 | 5000 | 2500 | 15.82 | 0.4931 | 0.5069 | 0.4931 | 0.5069 | 2431 | 4999 | 2570 | 2570 | 4999 | 2431 | 40.46  | 78.93  |
| 10000 | 0.86 | 0.5  | 0.5  | 2150 | 5000 | 2500 | 13.67 | 0.4931 | 0.5069 | 0.4931 | 0.5069 | 2431 | 4999 | 2570 | 2570 | 4999 | 2431 | 34.42  | 70.52  |
| 10000 | 0.87 | 0.5  | 0.5  | 2175 | 5000 | 2500 | 11.69 | 0.4931 | 0.5069 | 0.4931 | 0.5069 | 2431 | 4999 | 2570 | 2570 | 4999 | 2431 | 28.89  | 62.59  |
| 10000 | 0.88 | 0.5  | 0.5  | 2200 | 5000 | 2500 | 9.88  | 0.4931 | 0.5069 | 0.4931 | 0.5069 | 2431 | 4999 | 2570 | 2570 | 4999 | 2431 | 23.88  | 55.16  |
| 10000 | 0.89 | 0.5  | 0.5  | 2225 | 5000 | 2500 | 8.24  | 0.4931 | 0.5069 | 0.4931 | 0.5069 | 2431 | 4999 | 2570 | 2570 | 4999 | 2431 | 19.38  | 48.21  |
| 10000 | 0.90 | 0.5  | 0.5  | 2250 | 5000 | 2500 | 6.75  | 0.4931 | 0.5069 | 0.4931 | 0.5069 | 2431 | 4999 | 2570 | 2570 | 4999 | 2431 | 15.40  | 41.74  |
| 10000 | 0.91 | 0.5  | 0.5  | 2275 | 5000 | 2500 | 5.43  | 0.4931 | 0.5069 | 0.4931 | 0.5069 | 2431 | 4999 | 2570 | 2570 | 4999 | 2431 | 11.93  | 35.76  |
| 10000 | 0.92 | 0.5  | 0.5  | 2300 | 5000 | 2500 | 4.25  | 0.4931 | 0.5069 | 0.4931 | 0.5069 | 2431 | 4999 | 2570 | 2570 | 4999 | 2431 | 8.97   | 30.27  |
| 10000 | 0.93 | 0.5  | 0.5  | 2325 | 5000 | 2500 | 3.23  | 0.4931 | 0.5069 | 0.4931 | 0.5069 | 2431 | 4999 | 2570 | 2570 | 4999 | 2431 | 6.53   | 25.26  |
| 10000 | 0.94 | 0.5  | 0.5  | 2350 | 5000 | 2500 | 2.36  | 0.4931 | 0.5069 | 0.4931 | 0.5069 | 2431 | 4999 | 2570 | 2570 | 4999 | 2431 | 4.61   | 20.74  |
| 10000 | 0.95 | 0.5  | 0.5  | 2375 | 5000 | 2500 | 1.62  | 0.4931 | 0.5069 | 0.4931 | 0.5069 | 2431 | 4999 | 2570 | 2570 | 4999 | 2431 | 3.19   | 16.71  |
| 10000 | 0.96 | 0.5  | 0.5  | 2400 | 5000 | 2500 | 1.03  | 0.4931 | 0.5069 | 0.4931 | 0.5069 | 2431 | 4999 | 2570 | 2570 | 4999 | 2431 | 2.29   | 13.16  |
| 10000 | 0.97 | 0.5  | 0.5  | 2425 | 5000 | 2500 | 0.58  | 0.4931 | 0.5069 | 0.4931 | 0.5069 | 2431 | 4999 | 2570 | 2570 | 4999 | 2431 | 1.91   | 10.10  |
| 10000 | 0.98 | 0.5  | 0.5  | 2450 | 5000 | 2500 | 0.25  | 0.4931 | 0.5069 | 0.4931 | 0.5069 | 2431 | 4999 | 2570 | 2570 | 4999 | 2431 | 2.04   | 7.53   |
| 10000 | 0.99 | 0.5  | 0.5  | 2475 | 5000 | 2500 | 0.06  | 0.4931 | 0.5069 | 0.4931 | 0.5069 | 2431 | 4999 | 2570 | 2570 | 4999 | 2431 | 2.68   | 5.44   |
| 10000 | 1.00 | 0.5  | 0.5  | 2500 | 5000 | 2500 | 0.00  | 0.4931 | 0.5069 | 0.4931 | 0.5069 | 2431 | 4999 | 2570 | 2570 | 4999 | 2431 | 3.84   | 3.84   |
| 10000 | 1.01 | 0.5  | 0.5  | 2525 | 5000 | 2500 | 0.06  | 0.4931 | 0.5069 | 0.4931 | 0.5069 | 2431 | 4999 | 2570 | 2570 | 4999 | 2431 | 5.52   | 2.73   |
| 10000 | 1.02 | 0.5  | 0.5  | 2550 | 5000 | 2500 | 0.25  | 0.4931 | 0.5069 | 0.4931 | 0.5069 | 2431 | 4999 | 2570 | 2570 | 4999 | 2431 | 7.70   | 2.10   |
| 10000 | 1.03 | 0.5  | 0.5  | 2575 | 5000 | 2500 | 0.55  | 0.4931 | 0.5069 | 0.4931 | 0.5069 | 2431 | 4999 | 2570 | 2570 | 4999 | 2431 | 10.40  | 1.96   |
| 10000 | 1.04 | 0.5  | 0.5  | 2600 | 5000 | 2500 | 0.97  | 0.4931 | 0.5069 | 0.4931 | 0.5069 | 2431 | 4999 | 2570 | 2570 | 4999 | 2431 | 13.62  | 2.30   |
| 10000 | 1.05 | 0.5  | 0.5  | 2625 | 5000 | 2500 | 1.51  | 0.4931 | 0.5069 | 0.4931 | 0.5069 | 2431 | 4999 | 2570 | 2570 | 4999 | 2431 | 17.35  | 3.13   |
| 10000 | 1.06 | 0.5  | 0.5  | 2650 | 5000 | 2500 | 2.15  | 0.4931 | 0.5069 | 0.4931 | 0.5069 | 2431 | 4999 | 2570 | 2570 | 4999 | 2431 | 21.59  | 4.45   |
| 10000 | 1.07 | 0.5  | 0.5  | 2675 | 5000 | 2500 | 2.91  | 0.4931 | 0.5069 | 0.4931 | 0.5069 | 2431 | 4999 | 2570 | 2570 | 4999 | 2431 | 26.35  | 6.26   |

|       |      |      |      |      |      |      |       |        |        |        |        |      |      |      |      |      |      |        |        |
|-------|------|------|------|------|------|------|-------|--------|--------|--------|--------|------|------|------|------|------|------|--------|--------|
| 10000 | 1.08 | 0.5  | 0.5  | 2700 | 5000 | 2500 | 3.77  | 0.4931 | 0.5069 | 0.4931 | 0.5069 | 2431 | 4999 | 2570 | 2570 | 4999 | 2431 | 31.62  | 8.55   |
| 10000 | 1.09 | 0.5  | 0.5  | 2725 | 5000 | 2500 | 4.74  | 0.4931 | 0.5069 | 0.4931 | 0.5069 | 2431 | 4999 | 2570 | 2570 | 4999 | 2431 | 37.40  | 11.32  |
| 10000 | 1.10 | 0.5  | 0.5  | 2750 | 5000 | 2500 | 5.81  | 0.4931 | 0.5069 | 0.4931 | 0.5069 | 2431 | 4999 | 2570 | 2570 | 4999 | 2431 | 43.70  | 14.59  |
| 10000 | 1.11 | 0.5  | 0.5  | 2775 | 5000 | 2500 | 6.98  | 0.4931 | 0.5069 | 0.4931 | 0.5069 | 2431 | 4999 | 2570 | 2570 | 4999 | 2431 | 50.52  | 18.34  |
| 10000 | 1.12 | 0.5  | 0.5  | 2800 | 5000 | 2500 | 8.25  | 0.4931 | 0.5069 | 0.4931 | 0.5069 | 2431 | 4999 | 2570 | 2570 | 4999 | 2431 | 57.85  | 22.57  |
| 10000 | 1.13 | 0.5  | 0.5  | 2825 | 5000 | 2500 | 9.62  | 0.4931 | 0.5069 | 0.4931 | 0.5069 | 2431 | 4999 | 2570 | 2570 | 4999 | 2431 | 65.69  | 27.30  |
| 10000 | 1.14 | 0.5  | 0.5  | 2850 | 5000 | 2500 | 11.07 | 0.4931 | 0.5069 | 0.4931 | 0.5069 | 2431 | 4999 | 2570 | 2570 | 4999 | 2431 | 74.04  | 32.51  |
| 10000 | 1.15 | 0.5  | 0.5  | 2875 | 5000 | 2500 | 12.63 | 0.4931 | 0.5069 | 0.4931 | 0.5069 | 2431 | 4999 | 2570 | 2570 | 4999 | 2431 | 82.91  | 38.20  |
| 10000 | 1.16 | 0.5  | 0.5  | 2900 | 5000 | 2500 | 14.27 | 0.4931 | 0.5069 | 0.4931 | 0.5069 | 2431 | 4999 | 2570 | 2570 | 4999 | 2431 | 92.30  | 44.38  |
| 10000 | 1.17 | 0.5  | 0.5  | 2925 | 5000 | 2500 | 16.00 | 0.4931 | 0.5069 | 0.4931 | 0.5069 | 2431 | 4999 | 2570 | 2570 | 4999 | 2431 | 102.20 | 51.05  |
| 10000 | 1.18 | 0.5  | 0.5  | 2950 | 5000 | 2500 | 17.81 | 0.4931 | 0.5069 | 0.4931 | 0.5069 | 2431 | 4999 | 2570 | 2570 | 4999 | 2431 | 112.61 | 58.21  |
| 10000 | 1.19 | 0.5  | 0.5  | 2975 | 5000 | 2500 | 19.71 | 0.4931 | 0.5069 | 0.4931 | 0.5069 | 2431 | 4999 | 2570 | 2570 | 4999 | 2431 | 123.54 | 65.85  |
| 10000 | 1.20 | 0.5  | 0.5  | 3000 | 5000 | 2500 | 21.69 | 0.4931 | 0.5069 | 0.4931 | 0.5069 | 2431 | 4999 | 2570 | 2570 | 4999 | 2431 | 134.98 | 73.97  |
| 10000 | 0.80 | 0.55 | 0.45 | 2420 | 4950 | 2025 | 29.06 | 0.5431 | 0.5569 | 0.4431 | 0.4569 | 2950 | 4963 | 2088 | 3101 | 4935 | 1963 | 97.01  | 151.65 |
| 10000 | 0.81 | 0.55 | 0.45 | 2450 | 4950 | 2025 | 25.99 | 0.5431 | 0.5569 | 0.4431 | 0.4569 | 2950 | 4963 | 2088 | 3101 | 4935 | 1963 | 86.45  | 138.66 |
| 10000 | 0.82 | 0.55 | 0.45 | 2481 | 4950 | 2025 | 23.12 | 0.5431 | 0.5569 | 0.4431 | 0.4569 | 2950 | 4963 | 2088 | 3101 | 4935 | 1963 | 76.52  | 126.25 |
| 10000 | 0.83 | 0.55 | 0.45 | 2511 | 4950 | 2025 | 20.44 | 0.5431 | 0.5569 | 0.4431 | 0.4569 | 2950 | 4963 | 2088 | 3101 | 4935 | 1963 | 67.21  | 114.43 |
| 10000 | 0.84 | 0.55 | 0.45 | 2541 | 4950 | 2025 | 17.94 | 0.5431 | 0.5569 | 0.4431 | 0.4569 | 2950 | 4963 | 2088 | 3101 | 4935 | 1963 | 58.52  | 103.21 |
| 10000 | 0.85 | 0.55 | 0.45 | 2571 | 4950 | 2025 | 15.63 | 0.5431 | 0.5569 | 0.4431 | 0.4569 | 2950 | 4963 | 2088 | 3101 | 4935 | 1963 | 50.45  | 92.57  |
| 10000 | 0.86 | 0.55 | 0.45 | 2602 | 4950 | 2025 | 13.50 | 0.5431 | 0.5569 | 0.4431 | 0.4569 | 2950 | 4963 | 2088 | 3101 | 4935 | 1963 | 42.99  | 82.53  |
| 10000 | 0.87 | 0.55 | 0.45 | 2632 | 4950 | 2025 | 11.54 | 0.5431 | 0.5569 | 0.4431 | 0.4569 | 2950 | 4963 | 2088 | 3101 | 4935 | 1963 | 36.16  | 73.07  |
| 10000 | 0.88 | 0.55 | 0.45 | 2662 | 4950 | 2025 | 9.74  | 0.5431 | 0.5569 | 0.4431 | 0.4569 | 2950 | 4963 | 2088 | 3101 | 4935 | 1963 | 29.95  | 64.21  |
| 10000 | 0.89 | 0.55 | 0.45 | 2692 | 4950 | 2025 | 8.12  | 0.5431 | 0.5569 | 0.4431 | 0.4569 | 2950 | 4963 | 2088 | 3101 | 4935 | 1963 | 24.37  | 55.93  |
| 10000 | 0.90 | 0.55 | 0.45 | 2723 | 4950 | 2025 | 6.65  | 0.5431 | 0.5569 | 0.4431 | 0.4569 | 2950 | 4963 | 2088 | 3101 | 4935 | 1963 | 19.40  | 48.25  |
| 10000 | 0.91 | 0.55 | 0.45 | 2753 | 4950 | 2025 | 5.34  | 0.5431 | 0.5569 | 0.4431 | 0.4569 | 2950 | 4963 | 2088 | 3101 | 4935 | 1963 | 15.05  | 41.15  |
| 10000 | 0.92 | 0.55 | 0.45 | 2783 | 4950 | 2025 | 4.19  | 0.5431 | 0.5569 | 0.4431 | 0.4569 | 2950 | 4963 | 2088 | 3101 | 4935 | 1963 | 11.32  | 34.65  |
| 10000 | 0.93 | 0.55 | 0.45 | 2813 | 4950 | 2025 | 3.18  | 0.5431 | 0.5569 | 0.4431 | 0.4569 | 2950 | 4963 | 2088 | 3101 | 4935 | 1963 | 8.21   | 28.73  |
| 10000 | 0.94 | 0.55 | 0.45 | 2844 | 4950 | 2025 | 2.32  | 0.5431 | 0.5569 | 0.4431 | 0.4569 | 2950 | 4963 | 2088 | 3101 | 4935 | 1963 | 5.72   | 23.41  |
| 10000 | 0.95 | 0.55 | 0.45 | 2874 | 4950 | 2025 | 1.59  | 0.5431 | 0.5569 | 0.4431 | 0.4569 | 2950 | 4963 | 2088 | 3101 | 4935 | 1963 | 3.86   | 18.67  |
| 10000 | 0.96 | 0.55 | 0.45 | 2904 | 4950 | 2025 | 1.01  | 0.5431 | 0.5569 | 0.4431 | 0.4569 | 2950 | 4963 | 2088 | 3101 | 4935 | 1963 | 2.61   | 14.53  |
| 10000 | 0.97 | 0.55 | 0.45 | 2934 | 4950 | 2025 | 0.56  | 0.5431 | 0.5569 | 0.4431 | 0.4569 | 2950 | 4963 | 2088 | 3101 | 4935 | 1963 | 1.99   | 10.98  |
| 10000 | 0.98 | 0.55 | 0.45 | 2965 | 4950 | 2025 | 0.25  | 0.5431 | 0.5569 | 0.4431 | 0.4569 | 2950 | 4963 | 2088 | 3101 | 4935 | 1963 | 1.98   | 8.01   |
| 10000 | 0.99 | 0.55 | 0.45 | 2995 | 4950 | 2025 | 0.06  | 0.5431 | 0.5569 | 0.4431 | 0.4569 | 2950 | 4963 | 2088 | 3101 | 4935 | 1963 | 2.60   | 5.64   |
| 10000 | 1.00 | 0.55 | 0.45 | 3025 | 4950 | 2025 | 0.00  | 0.5431 | 0.5569 | 0.4431 | 0.4569 | 2950 | 4963 | 2088 | 3101 | 4935 | 1963 | 3.83   | 3.85   |
| 10000 | 1.01 | 0.55 | 0.45 | 3055 | 4950 | 2025 | 0.06  | 0.5431 | 0.5569 | 0.4431 | 0.4569 | 2950 | 4963 | 2088 | 3101 | 4935 | 1963 | 5.69   | 2.66   |

|       |      |      |      |      |      |      |       |        |        |        |        |      |      |      |      |      |      |        |        |
|-------|------|------|------|------|------|------|-------|--------|--------|--------|--------|------|------|------|------|------|------|--------|--------|
| 10000 | 1.02 | 0.55 | 0.45 | 3086 | 4950 | 2025 | 0.24  | 0.5431 | 0.5569 | 0.4431 | 0.4569 | 2950 | 4963 | 2088 | 3101 | 4935 | 1963 | 8.16   | 2.06   |
| 10000 | 1.03 | 0.55 | 0.45 | 3116 | 4950 | 2025 | 0.54  | 0.5431 | 0.5569 | 0.4431 | 0.4569 | 2950 | 4963 | 2088 | 3101 | 4935 | 1963 | 11.26  | 2.04   |
| 10000 | 1.04 | 0.55 | 0.45 | 3146 | 4950 | 2025 | 0.95  | 0.5431 | 0.5569 | 0.4431 | 0.4569 | 2950 | 4963 | 2088 | 3101 | 4935 | 1963 | 14.98  | 2.62   |
| 10000 | 1.05 | 0.55 | 0.45 | 3176 | 4950 | 2025 | 1.47  | 0.5431 | 0.5569 | 0.4431 | 0.4569 | 2950 | 4963 | 2088 | 3101 | 4935 | 1963 | 19.32  | 3.79   |
| 10000 | 1.06 | 0.55 | 0.45 | 3207 | 4950 | 2025 | 2.10  | 0.5431 | 0.5569 | 0.4431 | 0.4569 | 2950 | 4963 | 2088 | 3101 | 4935 | 1963 | 24.28  | 5.54   |
| 10000 | 1.07 | 0.55 | 0.45 | 3237 | 4950 | 2025 | 2.84  | 0.5431 | 0.5569 | 0.4431 | 0.4569 | 2950 | 4963 | 2088 | 3101 | 4935 | 1963 | 29.85  | 7.89   |
| 10000 | 1.08 | 0.55 | 0.45 | 3267 | 4950 | 2025 | 3.68  | 0.5431 | 0.5569 | 0.4431 | 0.4569 | 2950 | 4963 | 2088 | 3101 | 4935 | 1963 | 36.05  | 10.83  |
| 10000 | 1.09 | 0.55 | 0.45 | 3297 | 4950 | 2025 | 4.63  | 0.5431 | 0.5569 | 0.4431 | 0.4569 | 2950 | 4963 | 2088 | 3101 | 4935 | 1963 | 42.87  | 14.35  |
| 10000 | 1.10 | 0.55 | 0.45 | 3328 | 4950 | 2025 | 5.67  | 0.5431 | 0.5569 | 0.4431 | 0.4569 | 2950 | 4963 | 2088 | 3101 | 4935 | 1963 | 50.31  | 18.47  |
| 10000 | 1.11 | 0.55 | 0.45 | 3358 | 4950 | 2025 | 6.81  | 0.5431 | 0.5569 | 0.4431 | 0.4569 | 2950 | 4963 | 2088 | 3101 | 4935 | 1963 | 58.37  | 23.18  |
| 10000 | 1.12 | 0.55 | 0.45 | 3388 | 4950 | 2025 | 8.04  | 0.5431 | 0.5569 | 0.4431 | 0.4569 | 2950 | 4963 | 2088 | 3101 | 4935 | 1963 | 67.06  | 28.48  |
| 10000 | 1.13 | 0.55 | 0.45 | 3418 | 4950 | 2025 | 9.37  | 0.5431 | 0.5569 | 0.4431 | 0.4569 | 2950 | 4963 | 2088 | 3101 | 4935 | 1963 | 76.36  | 34.36  |
| 10000 | 1.14 | 0.55 | 0.45 | 3449 | 4950 | 2025 | 10.79 | 0.5431 | 0.5569 | 0.4431 | 0.4569 | 2950 | 4963 | 2088 | 3101 | 4935 | 1963 | 86.28  | 40.84  |
| 10000 | 1.15 | 0.55 | 0.45 | 3479 | 4950 | 2025 | 12.30 | 0.5431 | 0.5569 | 0.4431 | 0.4569 | 2950 | 4963 | 2088 | 3101 | 4935 | 1963 | 96.82  | 47.91  |
| 10000 | 1.16 | 0.55 | 0.45 | 3509 | 4950 | 2025 | 13.89 | 0.5431 | 0.5569 | 0.4431 | 0.4569 | 2950 | 4963 | 2088 | 3101 | 4935 | 1963 | 107.98 | 55.57  |
| 10000 | 1.17 | 0.55 | 0.45 | 3539 | 4950 | 2025 | 15.57 | 0.5431 | 0.5569 | 0.4431 | 0.4569 | 2950 | 4963 | 2088 | 3101 | 4935 | 1963 | 119.77 | 63.81  |
| 10000 | 1.18 | 0.55 | 0.45 | 3570 | 4950 | 2025 | 17.33 | 0.5431 | 0.5569 | 0.4431 | 0.4569 | 2950 | 4963 | 2088 | 3101 | 4935 | 1963 | 132.17 | 72.65  |
| 10000 | 1.19 | 0.55 | 0.45 | 3600 | 4950 | 2025 | 19.17 | 0.5431 | 0.5569 | 0.4431 | 0.4569 | 2950 | 4963 | 2088 | 3101 | 4935 | 1963 | 145.20 | 82.08  |
| 10000 | 1.20 | 0.55 | 0.45 | 3630 | 4950 | 2025 | 21.09 | 0.5431 | 0.5569 | 0.4431 | 0.4569 | 2950 | 4963 | 2088 | 3101 | 4935 | 1963 | 158.84 | 92.10  |
| 10000 | 0.80 | 0.6  | 0.4  | 2880 | 4800 | 1600 | 27.61 | 0.5932 | 0.6068 | 0.3932 | 0.4068 | 3519 | 4826 | 1655 | 3682 | 4772 | 1546 | 117.98 | 176.71 |
| 10000 | 0.81 | 0.6  | 0.4  | 2916 | 4800 | 1600 | 24.68 | 0.5932 | 0.6068 | 0.3932 | 0.4068 | 3519 | 4826 | 1655 | 3682 | 4772 | 1546 | 105.28 | 161.38 |
| 10000 | 0.82 | 0.6  | 0.4  | 2952 | 4800 | 1600 | 21.94 | 0.5932 | 0.6068 | 0.3932 | 0.4068 | 3519 | 4826 | 1655 | 3682 | 4772 | 1546 | 93.31  | 146.75 |
| 10000 | 0.83 | 0.6  | 0.4  | 2988 | 4800 | 1600 | 19.38 | 0.5932 | 0.6068 | 0.3932 | 0.4068 | 3519 | 4826 | 1655 | 3682 | 4772 | 1546 | 82.08  | 132.83 |
| 10000 | 0.84 | 0.6  | 0.4  | 3024 | 4800 | 1600 | 17.00 | 0.5932 | 0.6068 | 0.3932 | 0.4068 | 3519 | 4826 | 1655 | 3682 | 4772 | 1546 | 71.58  | 119.61 |
| 10000 | 0.85 | 0.6  | 0.4  | 3060 | 4800 | 1600 | 14.81 | 0.5932 | 0.6068 | 0.3932 | 0.4068 | 3519 | 4826 | 1655 | 3682 | 4772 | 1546 | 61.82  | 107.10 |
| 10000 | 0.86 | 0.6  | 0.4  | 3096 | 4800 | 1600 | 12.78 | 0.5932 | 0.6068 | 0.3932 | 0.4068 | 3519 | 4826 | 1655 | 3682 | 4772 | 1546 | 52.80  | 95.29  |
| 10000 | 0.87 | 0.6  | 0.4  | 3132 | 4800 | 1600 | 10.92 | 0.5932 | 0.6068 | 0.3932 | 0.4068 | 3519 | 4826 | 1655 | 3682 | 4772 | 1546 | 44.51  | 84.18  |
| 10000 | 0.88 | 0.6  | 0.4  | 3168 | 4800 | 1600 | 9.22  | 0.5932 | 0.6068 | 0.3932 | 0.4068 | 3519 | 4826 | 1655 | 3682 | 4772 | 1546 | 36.96  | 73.78  |
| 10000 | 0.89 | 0.6  | 0.4  | 3204 | 4800 | 1600 | 7.67  | 0.5932 | 0.6068 | 0.3932 | 0.4068 | 3519 | 4826 | 1655 | 3682 | 4772 | 1546 | 30.15  | 64.08  |
| 10000 | 0.90 | 0.6  | 0.4  | 3240 | 4800 | 1600 | 6.28  | 0.5932 | 0.6068 | 0.3932 | 0.4068 | 3519 | 4826 | 1655 | 3682 | 4772 | 1546 | 24.07  | 55.09  |
| 10000 | 0.91 | 0.6  | 0.4  | 3276 | 4800 | 1600 | 5.04  | 0.5932 | 0.6068 | 0.3932 | 0.4068 | 3519 | 4826 | 1655 | 3682 | 4772 | 1546 | 18.73  | 46.80  |
| 10000 | 0.92 | 0.6  | 0.4  | 3312 | 4800 | 1600 | 3.95  | 0.5932 | 0.6068 | 0.3932 | 0.4068 | 3519 | 4826 | 1655 | 3682 | 4772 | 1546 | 14.13  | 39.21  |
| 10000 | 0.93 | 0.6  | 0.4  | 3348 | 4800 | 1600 | 3.00  | 0.5932 | 0.6068 | 0.3932 | 0.4068 | 3519 | 4826 | 1655 | 3682 | 4772 | 1546 | 10.26  | 32.33  |
| 10000 | 0.94 | 0.6  | 0.4  | 3384 | 4800 | 1600 | 2.18  | 0.5932 | 0.6068 | 0.3932 | 0.4068 | 3519 | 4826 | 1655 | 3682 | 4772 | 1546 | 7.13   | 26.15  |
| 10000 | 0.95 | 0.6  | 0.4  | 3420 | 4800 | 1600 | 1.50  | 0.5932 | 0.6068 | 0.3932 | 0.4068 | 3519 | 4826 | 1655 | 3682 | 4772 | 1546 | 4.74   | 20.68  |

|       |      |      |      |      |      |      |       |        |        |        |        |      |      |      |      |      |      |        |        |
|-------|------|------|------|------|------|------|-------|--------|--------|--------|--------|------|------|------|------|------|------|--------|--------|
| 10000 | 0.96 | 0.6  | 0.4  | 3456 | 4800 | 1600 | 0.95  | 0.5932 | 0.6068 | 0.3932 | 0.4068 | 3519 | 4826 | 1655 | 3682 | 4772 | 1546 | 3.08   | 15.91  |
| 10000 | 0.97 | 0.6  | 0.4  | 3492 | 4800 | 1600 | 0.53  | 0.5932 | 0.6068 | 0.3932 | 0.4068 | 3519 | 4826 | 1655 | 3682 | 4772 | 1546 | 2.16   | 11.84  |
| 10000 | 0.98 | 0.6  | 0.4  | 3528 | 4800 | 1600 | 0.23  | 0.5932 | 0.6068 | 0.3932 | 0.4068 | 3519 | 4826 | 1655 | 3682 | 4772 | 1546 | 1.98   | 8.48   |
| 10000 | 0.99 | 0.6  | 0.4  | 3564 | 4800 | 1600 | 0.06  | 0.5932 | 0.6068 | 0.3932 | 0.4068 | 3519 | 4826 | 1655 | 3682 | 4772 | 1546 | 2.53   | 5.82   |
| 10000 | 1.00 | 0.6  | 0.4  | 3600 | 4800 | 1600 | 0.00  | 0.5932 | 0.6068 | 0.3932 | 0.4068 | 3519 | 4826 | 1655 | 3682 | 4772 | 1546 | 3.82   | 3.86   |
| 10000 | 1.01 | 0.6  | 0.4  | 3636 | 4800 | 1600 | 0.06  | 0.5932 | 0.6068 | 0.3932 | 0.4068 | 3519 | 4826 | 1655 | 3682 | 4772 | 1546 | 5.85   | 2.61   |
| 10000 | 1.02 | 0.6  | 0.4  | 3672 | 4800 | 1600 | 0.23  | 0.5932 | 0.6068 | 0.3932 | 0.4068 | 3519 | 4826 | 1655 | 3682 | 4772 | 1546 | 8.61   | 2.07   |
| 10000 | 1.03 | 0.6  | 0.4  | 3708 | 4800 | 1600 | 0.51  | 0.5932 | 0.6068 | 0.3932 | 0.4068 | 3519 | 4826 | 1655 | 3682 | 4772 | 1546 | 12.11  | 2.23   |
| 10000 | 1.04 | 0.6  | 0.4  | 3744 | 4800 | 1600 | 0.89  | 0.5932 | 0.6068 | 0.3932 | 0.4068 | 3519 | 4826 | 1655 | 3682 | 4772 | 1546 | 16.34  | 3.09   |
| 10000 | 1.05 | 0.6  | 0.4  | 3780 | 4800 | 1600 | 1.38  | 0.5932 | 0.6068 | 0.3932 | 0.4068 | 3519 | 4826 | 1655 | 3682 | 4772 | 1546 | 21.32  | 4.65   |
| 10000 | 1.06 | 0.6  | 0.4  | 3816 | 4800 | 1600 | 1.97  | 0.5932 | 0.6068 | 0.3932 | 0.4068 | 3519 | 4826 | 1655 | 3682 | 4772 | 1546 | 27.03  | 6.92   |
| 10000 | 1.07 | 0.6  | 0.4  | 3852 | 4800 | 1600 | 2.66  | 0.5932 | 0.6068 | 0.3932 | 0.4068 | 3519 | 4826 | 1655 | 3682 | 4772 | 1546 | 33.47  | 9.90   |
| 10000 | 1.08 | 0.6  | 0.4  | 3888 | 4800 | 1600 | 3.45  | 0.5932 | 0.6068 | 0.3932 | 0.4068 | 3519 | 4826 | 1655 | 3682 | 4772 | 1546 | 40.65  | 13.57  |
| 10000 | 1.09 | 0.6  | 0.4  | 3924 | 4800 | 1600 | 4.34  | 0.5932 | 0.6068 | 0.3932 | 0.4068 | 3519 | 4826 | 1655 | 3682 | 4772 | 1546 | 48.57  | 17.96  |
| 10000 | 1.10 | 0.6  | 0.4  | 3960 | 4800 | 1600 | 5.31  | 0.5932 | 0.6068 | 0.3932 | 0.4068 | 3519 | 4826 | 1655 | 3682 | 4772 | 1546 | 57.23  | 23.04  |
| 10000 | 1.11 | 0.6  | 0.4  | 3996 | 4800 | 1600 | 6.38  | 0.5932 | 0.6068 | 0.3932 | 0.4068 | 3519 | 4826 | 1655 | 3682 | 4772 | 1546 | 66.62  | 28.83  |
| 10000 | 1.12 | 0.6  | 0.4  | 4032 | 4800 | 1600 | 7.53  | 0.5932 | 0.6068 | 0.3932 | 0.4068 | 3519 | 4826 | 1655 | 3682 | 4772 | 1546 | 76.75  | 35.32  |
| 10000 | 1.13 | 0.6  | 0.4  | 4068 | 4800 | 1600 | 8.77  | 0.5932 | 0.6068 | 0.3932 | 0.4068 | 3519 | 4826 | 1655 | 3682 | 4772 | 1546 | 87.61  | 42.52  |
| 10000 | 1.14 | 0.6  | 0.4  | 4104 | 4800 | 1600 | 10.09 | 0.5932 | 0.6068 | 0.3932 | 0.4068 | 3519 | 4826 | 1655 | 3682 | 4772 | 1546 | 99.21  | 50.42  |
| 10000 | 1.15 | 0.6  | 0.4  | 4140 | 4800 | 1600 | 11.50 | 0.5932 | 0.6068 | 0.3932 | 0.4068 | 3519 | 4826 | 1655 | 3682 | 4772 | 1546 | 111.55 | 59.03  |
| 10000 | 1.16 | 0.6  | 0.4  | 4176 | 4800 | 1600 | 12.98 | 0.5932 | 0.6068 | 0.3932 | 0.4068 | 3519 | 4826 | 1655 | 3682 | 4772 | 1546 | 124.62 | 68.34  |
| 10000 | 1.17 | 0.6  | 0.4  | 4212 | 4800 | 1600 | 14.55 | 0.5932 | 0.6068 | 0.3932 | 0.4068 | 3519 | 4826 | 1655 | 3682 | 4772 | 1546 | 138.44 | 78.35  |
| 10000 | 1.18 | 0.6  | 0.4  | 4248 | 4800 | 1600 | 16.19 | 0.5932 | 0.6068 | 0.3932 | 0.4068 | 3519 | 4826 | 1655 | 3682 | 4772 | 1546 | 152.98 | 89.07  |
| 10000 | 1.19 | 0.6  | 0.4  | 4284 | 4800 | 1600 | 17.90 | 0.5932 | 0.6068 | 0.3932 | 0.4068 | 3519 | 4826 | 1655 | 3682 | 4772 | 1546 | 168.27 | 100.49 |
| 10000 | 1.20 | 0.6  | 0.4  | 4320 | 4800 | 1600 | 19.69 | 0.5932 | 0.6068 | 0.3932 | 0.4068 | 3519 | 4826 | 1655 | 3682 | 4772 | 1546 | 184.29 | 112.61 |
| 10000 | 0.80 | 0.65 | 0.35 | 3380 | 4550 | 1225 | 25.04 | 0.6434 | 0.6566 | 0.3434 | 0.3566 | 4140 | 4589 | 1272 | 4311 | 4509 | 1179 | 141.39 | 203.35 |
| 10000 | 0.81 | 0.65 | 0.35 | 3422 | 4550 | 1225 | 22.37 | 0.6434 | 0.6566 | 0.3434 | 0.3566 | 4140 | 4589 | 1272 | 4311 | 4509 | 1179 | 126.32 | 185.51 |
| 10000 | 0.82 | 0.65 | 0.35 | 3465 | 4550 | 1225 | 19.87 | 0.6434 | 0.6566 | 0.3434 | 0.3566 | 4140 | 4589 | 1272 | 4311 | 4509 | 1179 | 112.11 | 168.50 |
| 10000 | 0.83 | 0.65 | 0.35 | 3507 | 4550 | 1225 | 17.55 | 0.6434 | 0.6566 | 0.3434 | 0.3566 | 4140 | 4589 | 1272 | 4311 | 4509 | 1179 | 98.76  | 152.31 |
| 10000 | 0.84 | 0.65 | 0.35 | 3549 | 4550 | 1225 | 15.39 | 0.6434 | 0.6566 | 0.3434 | 0.3566 | 4140 | 4589 | 1272 | 4311 | 4509 | 1179 | 86.28  | 136.96 |
| 10000 | 0.85 | 0.65 | 0.35 | 3591 | 4550 | 1225 | 13.39 | 0.6434 | 0.6566 | 0.3434 | 0.3566 | 4140 | 4589 | 1272 | 4311 | 4509 | 1179 | 74.66  | 122.43 |
| 10000 | 0.86 | 0.65 | 0.35 | 3634 | 4550 | 1225 | 11.55 | 0.6434 | 0.6566 | 0.3434 | 0.3566 | 4140 | 4589 | 1272 | 4311 | 4509 | 1179 | 63.90  | 108.73 |
| 10000 | 0.87 | 0.65 | 0.35 | 3676 | 4550 | 1225 | 9.86  | 0.6434 | 0.6566 | 0.3434 | 0.3566 | 4140 | 4589 | 1272 | 4311 | 4509 | 1179 | 54.00  | 95.86  |
| 10000 | 0.88 | 0.65 | 0.35 | 3718 | 4550 | 1225 | 8.32  | 0.6434 | 0.6566 | 0.3434 | 0.3566 | 4140 | 4589 | 1272 | 4311 | 4509 | 1179 | 44.96  | 83.81  |
| 10000 | 0.89 | 0.65 | 0.35 | 3760 | 4550 | 1225 | 6.93  | 0.6434 | 0.6566 | 0.3434 | 0.3566 | 4140 | 4589 | 1272 | 4311 | 4509 | 1179 | 36.79  | 72.60  |

|       |      |      |      |      |      |      |       |        |        |        |        |      |      |      |      |      |      |        |        |
|-------|------|------|------|------|------|------|-------|--------|--------|--------|--------|------|------|------|------|------|------|--------|--------|
| 10000 | 0.90 | 0.65 | 0.35 | 3803 | 4550 | 1225 | 5.67  | 0.6434 | 0.6566 | 0.3434 | 0.3566 | 4140 | 4589 | 1272 | 4311 | 4509 | 1179 | 29.48  | 62.21  |
| 10000 | 0.91 | 0.65 | 0.35 | 3845 | 4550 | 1225 | 4.55  | 0.6434 | 0.6566 | 0.3434 | 0.3566 | 4140 | 4589 | 1272 | 4311 | 4509 | 1179 | 23.03  | 52.65  |
| 10000 | 0.92 | 0.65 | 0.35 | 3887 | 4550 | 1225 | 3.56  | 0.6434 | 0.6566 | 0.3434 | 0.3566 | 4140 | 4589 | 1272 | 4311 | 4509 | 1179 | 17.45  | 43.92  |
| 10000 | 0.93 | 0.65 | 0.35 | 3929 | 4550 | 1225 | 2.70  | 0.6434 | 0.6566 | 0.3434 | 0.3566 | 4140 | 4589 | 1272 | 4311 | 4509 | 1179 | 12.72  | 36.01  |
| 10000 | 0.94 | 0.65 | 0.35 | 3972 | 4550 | 1225 | 1.97  | 0.6434 | 0.6566 | 0.3434 | 0.3566 | 4140 | 4589 | 1272 | 4311 | 4509 | 1179 | 8.86   | 28.94  |
| 10000 | 0.95 | 0.65 | 0.35 | 4014 | 4550 | 1225 | 1.35  | 0.6434 | 0.6566 | 0.3434 | 0.3566 | 4140 | 4589 | 1272 | 4311 | 4509 | 1179 | 5.86   | 22.69  |
| 10000 | 0.96 | 0.65 | 0.35 | 4056 | 4550 | 1225 | 0.86  | 0.6434 | 0.6566 | 0.3434 | 0.3566 | 4140 | 4589 | 1272 | 4311 | 4509 | 1179 | 3.73   | 17.27  |
| 10000 | 0.97 | 0.65 | 0.35 | 4098 | 4550 | 1225 | 0.48  | 0.6434 | 0.6566 | 0.3434 | 0.3566 | 4140 | 4589 | 1272 | 4311 | 4509 | 1179 | 2.45   | 12.68  |
| 10000 | 0.98 | 0.65 | 0.35 | 4141 | 4550 | 1225 | 0.21  | 0.6434 | 0.6566 | 0.3434 | 0.3566 | 4140 | 4589 | 1272 | 4311 | 4509 | 1179 | 2.04   | 8.92   |
| 10000 | 0.99 | 0.65 | 0.35 | 4183 | 4550 | 1225 | 0.05  | 0.6434 | 0.6566 | 0.3434 | 0.3566 | 4140 | 4589 | 1272 | 4311 | 4509 | 1179 | 2.50   | 5.98   |
| 10000 | 1.00 | 0.65 | 0.35 | 4225 | 4550 | 1225 | 0.00  | 0.6434 | 0.6566 | 0.3434 | 0.3566 | 4140 | 4589 | 1272 | 4311 | 4509 | 1179 | 3.81   | 3.88   |
| 10000 | 1.01 | 0.65 | 0.35 | 4267 | 4550 | 1225 | 0.05  | 0.6434 | 0.6566 | 0.3434 | 0.3566 | 4140 | 4589 | 1272 | 4311 | 4509 | 1179 | 5.99   | 2.60   |
| 10000 | 1.02 | 0.65 | 0.35 | 4310 | 4550 | 1225 | 0.20  | 0.6434 | 0.6566 | 0.3434 | 0.3566 | 4140 | 4589 | 1272 | 4311 | 4509 | 1179 | 9.02   | 2.15   |
| 10000 | 1.03 | 0.65 | 0.35 | 4352 | 4550 | 1225 | 0.45  | 0.6434 | 0.6566 | 0.3434 | 0.3566 | 4140 | 4589 | 1272 | 4311 | 4509 | 1179 | 12.93  | 2.52   |
| 10000 | 1.04 | 0.65 | 0.35 | 4394 | 4550 | 1225 | 0.80  | 0.6434 | 0.6566 | 0.3434 | 0.3566 | 4140 | 4589 | 1272 | 4311 | 4509 | 1179 | 17.69  | 3.73   |
| 10000 | 1.05 | 0.65 | 0.35 | 4436 | 4550 | 1225 | 1.24  | 0.6434 | 0.6566 | 0.3434 | 0.3566 | 4140 | 4589 | 1272 | 4311 | 4509 | 1179 | 23.32  | 5.76   |
| 10000 | 1.06 | 0.65 | 0.35 | 4479 | 4550 | 1225 | 1.77  | 0.6434 | 0.6566 | 0.3434 | 0.3566 | 4140 | 4589 | 1272 | 4311 | 4509 | 1179 | 29.81  | 8.62   |
| 10000 | 1.07 | 0.65 | 0.35 | 4521 | 4550 | 1225 | 2.39  | 0.6434 | 0.6566 | 0.3434 | 0.3566 | 4140 | 4589 | 1272 | 4311 | 4509 | 1179 | 37.16  | 12.31  |
| 10000 | 1.08 | 0.65 | 0.35 | 4563 | 4550 | 1225 | 3.09  | 0.6434 | 0.6566 | 0.3434 | 0.3566 | 4140 | 4589 | 1272 | 4311 | 4509 | 1179 | 45.37  | 16.83  |
| 10000 | 1.09 | 0.65 | 0.35 | 4605 | 4550 | 1225 | 3.88  | 0.6434 | 0.6566 | 0.3434 | 0.3566 | 4140 | 4589 | 1272 | 4311 | 4509 | 1179 | 54.45  | 22.18  |
| 10000 | 1.10 | 0.65 | 0.35 | 4648 | 4550 | 1225 | 4.76  | 0.6434 | 0.6566 | 0.3434 | 0.3566 | 4140 | 4589 | 1272 | 4311 | 4509 | 1179 | 64.39  | 28.35  |
| 10000 | 1.11 | 0.65 | 0.35 | 4690 | 4550 | 1225 | 5.71  | 0.6434 | 0.6566 | 0.3434 | 0.3566 | 4140 | 4589 | 1272 | 4311 | 4509 | 1179 | 75.19  | 35.35  |
| 10000 | 1.12 | 0.65 | 0.35 | 4732 | 4550 | 1225 | 6.74  | 0.6434 | 0.6566 | 0.3434 | 0.3566 | 4140 | 4589 | 1272 | 4311 | 4509 | 1179 | 86.85  | 43.18  |
| 10000 | 1.13 | 0.65 | 0.35 | 4774 | 4550 | 1225 | 7.85  | 0.6434 | 0.6566 | 0.3434 | 0.3566 | 4140 | 4589 | 1272 | 4311 | 4509 | 1179 | 99.38  | 51.84  |
| 10000 | 1.14 | 0.65 | 0.35 | 4817 | 4550 | 1225 | 9.03  | 0.6434 | 0.6566 | 0.3434 | 0.3566 | 4140 | 4589 | 1272 | 4311 | 4509 | 1179 | 112.76 | 61.33  |
| 10000 | 1.15 | 0.65 | 0.35 | 4859 | 4550 | 1225 | 10.28 | 0.6434 | 0.6566 | 0.3434 | 0.3566 | 4140 | 4589 | 1272 | 4311 | 4509 | 1179 | 127.01 | 71.64  |
| 10000 | 1.16 | 0.65 | 0.35 | 4901 | 4550 | 1225 | 11.61 | 0.6434 | 0.6566 | 0.3434 | 0.3566 | 4140 | 4589 | 1272 | 4311 | 4509 | 1179 | 142.13 | 82.78  |
| 10000 | 1.17 | 0.65 | 0.35 | 4943 | 4550 | 1225 | 13.00 | 0.6434 | 0.6566 | 0.3434 | 0.3566 | 4140 | 4589 | 1272 | 4311 | 4509 | 1179 | 158.10 | 94.75  |
| 10000 | 1.18 | 0.65 | 0.35 | 4986 | 4550 | 1225 | 14.46 | 0.6434 | 0.6566 | 0.3434 | 0.3566 | 4140 | 4589 | 1272 | 4311 | 4509 | 1179 | 174.94 | 107.55 |
| 10000 | 1.19 | 0.65 | 0.35 | 5028 | 4550 | 1225 | 15.99 | 0.6434 | 0.6566 | 0.3434 | 0.3566 | 4140 | 4589 | 1272 | 4311 | 4509 | 1179 | 192.64 | 121.18 |
| 10000 | 1.20 | 0.65 | 0.35 | 5070 | 4550 | 1225 | 17.58 | 0.6434 | 0.6566 | 0.3434 | 0.3566 | 4140 | 4589 | 1272 | 4311 | 4509 | 1179 | 211.21 | 135.63 |
| 10000 | 0.80 | 0.7  | 0.3  | 3920 | 4200 | 900  | 21.51 | 0.6936 | 0.7064 | 0.2936 | 0.3064 | 4811 | 4250 | 939  | 4989 | 4148 | 862  | 167.35 | 231.47 |
| 10000 | 0.81 | 0.7  | 0.3  | 3969 | 4200 | 900  | 19.21 | 0.6936 | 0.7064 | 0.2936 | 0.3064 | 4811 | 4250 | 939  | 4989 | 4148 | 862  | 149.69 | 210.95 |
| 10000 | 0.82 | 0.7  | 0.3  | 4018 | 4200 | 900  | 17.06 | 0.6936 | 0.7064 | 0.2936 | 0.3064 | 4811 | 4250 | 939  | 4989 | 4148 | 862  | 133.03 | 191.39 |
| 10000 | 0.83 | 0.7  | 0.3  | 4067 | 4200 | 900  | 15.05 | 0.6936 | 0.7064 | 0.2936 | 0.3064 | 4811 | 4250 | 939  | 4989 | 4148 | 862  | 117.36 | 172.79 |

|       |      |     |     |      |      |     |       |        |        |        |        |      |      |     |      |      |     |        |        |
|-------|------|-----|-----|------|------|-----|-------|--------|--------|--------|--------|------|------|-----|------|------|-----|--------|--------|
| 10000 | 0.84 | 0.7 | 0.3 | 4116 | 4200 | 900 | 13.19 | 0.6936 | 0.7064 | 0.2936 | 0.3064 | 4811 | 4250 | 939 | 4989 | 4148 | 862 | 102.70 | 155.15 |
| 10000 | 0.85 | 0.7 | 0.3 | 4165 | 4200 | 900 | 11.48 | 0.6936 | 0.7064 | 0.2936 | 0.3064 | 4811 | 4250 | 939 | 4989 | 4148 | 862 | 89.03  | 138.48 |
| 10000 | 0.86 | 0.7 | 0.3 | 4214 | 4200 | 900 | 9.90  | 0.6936 | 0.7064 | 0.2936 | 0.3064 | 4811 | 4250 | 939 | 4989 | 4148 | 862 | 76.36  | 122.77 |
| 10000 | 0.87 | 0.7 | 0.3 | 4263 | 4200 | 900 | 8.45  | 0.6936 | 0.7064 | 0.2936 | 0.3064 | 4811 | 4250 | 939 | 4989 | 4148 | 862 | 64.69  | 108.02 |
| 10000 | 0.88 | 0.7 | 0.3 | 4312 | 4200 | 900 | 7.12  | 0.6936 | 0.7064 | 0.2936 | 0.3064 | 4811 | 4250 | 939 | 4989 | 4148 | 862 | 54.02  | 94.24  |
| 10000 | 0.89 | 0.7 | 0.3 | 4361 | 4200 | 900 | 5.93  | 0.6936 | 0.7064 | 0.2936 | 0.3064 | 4811 | 4250 | 939 | 4989 | 4148 | 862 | 44.35  | 81.42  |
| 10000 | 0.90 | 0.7 | 0.3 | 4410 | 4200 | 900 | 4.85  | 0.6936 | 0.7064 | 0.2936 | 0.3064 | 4811 | 4250 | 939 | 4989 | 4148 | 862 | 35.67  | 69.56  |
| 10000 | 0.91 | 0.7 | 0.3 | 4459 | 4200 | 900 | 3.89  | 0.6936 | 0.7064 | 0.2936 | 0.3064 | 4811 | 4250 | 939 | 4989 | 4148 | 862 | 27.99  | 58.66  |
| 10000 | 0.92 | 0.7 | 0.3 | 4508 | 4200 | 900 | 3.04  | 0.6936 | 0.7064 | 0.2936 | 0.3064 | 4811 | 4250 | 939 | 4989 | 4148 | 862 | 21.31  | 48.72  |
| 10000 | 0.93 | 0.7 | 0.3 | 4557 | 4200 | 900 | 2.31  | 0.6936 | 0.7064 | 0.2936 | 0.3064 | 4811 | 4250 | 939 | 4989 | 4148 | 862 | 15.63  | 39.75  |
| 10000 | 0.94 | 0.7 | 0.3 | 4606 | 4200 | 900 | 1.68  | 0.6936 | 0.7064 | 0.2936 | 0.3064 | 4811 | 4250 | 939 | 4989 | 4148 | 862 | 10.94  | 31.74  |
| 10000 | 0.95 | 0.7 | 0.3 | 4655 | 4200 | 900 | 1.15  | 0.6936 | 0.7064 | 0.2936 | 0.3064 | 4811 | 4250 | 939 | 4989 | 4148 | 862 | 7.26   | 24.69  |
| 10000 | 0.96 | 0.7 | 0.3 | 4704 | 4200 | 900 | 0.73  | 0.6936 | 0.7064 | 0.2936 | 0.3064 | 4811 | 4250 | 939 | 4989 | 4148 | 862 | 4.57   | 18.61  |
| 10000 | 0.97 | 0.7 | 0.3 | 4753 | 4200 | 900 | 0.41  | 0.6936 | 0.7064 | 0.2936 | 0.3064 | 4811 | 4250 | 939 | 4989 | 4148 | 862 | 2.88   | 13.48  |
| 10000 | 0.98 | 0.7 | 0.3 | 4802 | 4200 | 900 | 0.18  | 0.6936 | 0.7064 | 0.2936 | 0.3064 | 4811 | 4250 | 939 | 4989 | 4148 | 862 | 2.19   | 9.32   |
| 10000 | 0.99 | 0.7 | 0.3 | 4851 | 4200 | 900 | 0.04  | 0.6936 | 0.7064 | 0.2936 | 0.3064 | 4811 | 4250 | 939 | 4989 | 4148 | 862 | 2.49   | 6.13   |
| 10000 | 1.00 | 0.7 | 0.3 | 4900 | 4200 | 900 | 0.00  | 0.6936 | 0.7064 | 0.2936 | 0.3064 | 4811 | 4250 | 939 | 4989 | 4148 | 862 | 3.80   | 3.89   |
| 10000 | 1.01 | 0.7 | 0.3 | 4949 | 4200 | 900 | 0.04  | 0.6936 | 0.7064 | 0.2936 | 0.3064 | 4811 | 4250 | 939 | 4989 | 4148 | 862 | 6.10   | 2.62   |
| 10000 | 1.02 | 0.7 | 0.3 | 4998 | 4200 | 900 | 0.17  | 0.6936 | 0.7064 | 0.2936 | 0.3064 | 4811 | 4250 | 939 | 4989 | 4148 | 862 | 9.40   | 2.31   |
| 10000 | 1.03 | 0.7 | 0.3 | 5047 | 4200 | 900 | 0.39  | 0.6936 | 0.7064 | 0.2936 | 0.3064 | 4811 | 4250 | 939 | 4989 | 4148 | 862 | 13.70  | 2.96   |
| 10000 | 1.04 | 0.7 | 0.3 | 5096 | 4200 | 900 | 0.68  | 0.6936 | 0.7064 | 0.2936 | 0.3064 | 4811 | 4250 | 939 | 4989 | 4148 | 862 | 18.99  | 4.57   |
| 10000 | 1.05 | 0.7 | 0.3 | 5145 | 4200 | 900 | 1.05  | 0.6936 | 0.7064 | 0.2936 | 0.3064 | 4811 | 4250 | 939 | 4989 | 4148 | 862 | 25.29  | 7.15   |
| 10000 | 1.06 | 0.7 | 0.3 | 5194 | 4200 | 900 | 1.51  | 0.6936 | 0.7064 | 0.2936 | 0.3064 | 4811 | 4250 | 939 | 4989 | 4148 | 862 | 32.58  | 10.69  |
| 10000 | 1.07 | 0.7 | 0.3 | 5243 | 4200 | 900 | 2.03  | 0.6936 | 0.7064 | 0.2936 | 0.3064 | 4811 | 4250 | 939 | 4989 | 4148 | 862 | 40.87  | 15.19  |
| 10000 | 1.08 | 0.7 | 0.3 | 5292 | 4200 | 900 | 2.63  | 0.6936 | 0.7064 | 0.2936 | 0.3064 | 4811 | 4250 | 939 | 4989 | 4148 | 862 | 50.16  | 20.65  |
| 10000 | 1.09 | 0.7 | 0.3 | 5341 | 4200 | 900 | 3.30  | 0.6936 | 0.7064 | 0.2936 | 0.3064 | 4811 | 4250 | 939 | 4989 | 4148 | 862 | 60.44  | 27.08  |
| 10000 | 1.10 | 0.7 | 0.3 | 5390 | 4200 | 900 | 4.04  | 0.6936 | 0.7064 | 0.2936 | 0.3064 | 4811 | 4250 | 939 | 4989 | 4148 | 862 | 71.73  | 34.47  |
| 10000 | 1.11 | 0.7 | 0.3 | 5439 | 4200 | 900 | 4.85  | 0.6936 | 0.7064 | 0.2936 | 0.3064 | 4811 | 4250 | 939 | 4989 | 4148 | 862 | 84.01  | 42.82  |
| 10000 | 1.12 | 0.7 | 0.3 | 5488 | 4200 | 900 | 5.72  | 0.6936 | 0.7064 | 0.2936 | 0.3064 | 4811 | 4250 | 939 | 4989 | 4148 | 862 | 97.29  | 52.13  |
| 10000 | 1.13 | 0.7 | 0.3 | 5537 | 4200 | 900 | 6.66  | 0.6936 | 0.7064 | 0.2936 | 0.3064 | 4811 | 4250 | 939 | 4989 | 4148 | 862 | 111.57 | 62.41  |
| 10000 | 1.14 | 0.7 | 0.3 | 5586 | 4200 | 900 | 7.66  | 0.6936 | 0.7064 | 0.2936 | 0.3064 | 4811 | 4250 | 939 | 4989 | 4148 | 862 | 126.84 | 73.65  |
| 10000 | 1.15 | 0.7 | 0.3 | 5635 | 4200 | 900 | 8.72  | 0.6936 | 0.7064 | 0.2936 | 0.3064 | 4811 | 4250 | 939 | 4989 | 4148 | 862 | 143.12 | 85.85  |
| 10000 | 1.16 | 0.7 | 0.3 | 5684 | 4200 | 900 | 9.85  | 0.6936 | 0.7064 | 0.2936 | 0.3064 | 4811 | 4250 | 939 | 4989 | 4148 | 862 | 160.39 | 99.01  |
| 10000 | 1.17 | 0.7 | 0.3 | 5733 | 4200 | 900 | 11.03 | 0.6936 | 0.7064 | 0.2936 | 0.3064 | 4811 | 4250 | 939 | 4989 | 4148 | 862 | 178.66 | 113.14 |
| 10000 | 1.18 | 0.7 | 0.3 | 5782 | 4200 | 900 | 12.26 | 0.6936 | 0.7064 | 0.2936 | 0.3064 | 4811 | 4250 | 939 | 4989 | 4148 | 862 | 197.93 | 128.23 |



|       |      |      |      |      |      |     |       |        |        |        |        |      |      |     |      |      |     |        |        |
|-------|------|------|------|------|------|-----|-------|--------|--------|--------|--------|------|------|-----|------|------|-----|--------|--------|
| 10000 | 1.19 | 0.7  | 0.3  | 5831 | 4200 | 900 | 13.56 | 0.6936 | 0.7064 | 0.2936 | 0.3064 | 4811 | 4250 | 939 | 4989 | 4148 | 862 | 218.19 | 144.28 |
| 10000 | 1.20 | 0.7  | 0.3  | 5880 | 4200 | 900 | 14.90 | 0.6936 | 0.7064 | 0.2936 | 0.3064 | 4811 | 4250 | 939 | 4989 | 4148 | 862 | 239.46 | 161.29 |
| 10000 | 0.80 | 0.75 | 0.25 | 4500 | 3750 | 625 | 17.27 | 0.7440 | 0.7560 | 0.2440 | 0.2560 | 5535 | 3809 | 655 | 5715 | 3689 | 595 | 195.98 | 260.93 |
| 10000 | 0.81 | 0.75 | 0.25 | 4556 | 3750 | 625 | 15.42 | 0.7440 | 0.7560 | 0.2440 | 0.2560 | 5535 | 3809 | 655 | 5715 | 3689 | 595 | 175.51 | 237.56 |
| 10000 | 0.82 | 0.75 | 0.25 | 4613 | 3750 | 625 | 13.68 | 0.7440 | 0.7560 | 0.2440 | 0.2560 | 5535 | 3809 | 655 | 5715 | 3689 | 595 | 156.18 | 215.30 |
| 10000 | 0.83 | 0.75 | 0.25 | 4669 | 3750 | 625 | 12.07 | 0.7440 | 0.7560 | 0.2440 | 0.2560 | 5535 | 3809 | 655 | 5715 | 3689 | 595 | 138.00 | 194.14 |
| 10000 | 0.84 | 0.75 | 0.25 | 4725 | 3750 | 625 | 10.58 | 0.7440 | 0.7560 | 0.2440 | 0.2560 | 5535 | 3809 | 655 | 5715 | 3689 | 595 | 120.96 | 174.09 |
| 10000 | 0.85 | 0.75 | 0.25 | 4781 | 3750 | 625 | 9.20  | 0.7440 | 0.7560 | 0.2440 | 0.2560 | 5535 | 3809 | 655 | 5715 | 3689 | 595 | 105.06 | 155.15 |
| 10000 | 0.86 | 0.75 | 0.25 | 4838 | 3750 | 625 | 7.92  | 0.7440 | 0.7560 | 0.2440 | 0.2560 | 5535 | 3809 | 655 | 5715 | 3689 | 595 | 90.31  | 137.32 |
| 10000 | 0.87 | 0.75 | 0.25 | 4894 | 3750 | 625 | 6.76  | 0.7440 | 0.7560 | 0.2440 | 0.2560 | 5535 | 3809 | 655 | 5715 | 3689 | 595 | 76.70  | 120.59 |
| 10000 | 0.88 | 0.75 | 0.25 | 4950 | 3750 | 625 | 5.70  | 0.7440 | 0.7560 | 0.2440 | 0.2560 | 5535 | 3809 | 655 | 5715 | 3689 | 595 | 64.23  | 104.97 |
| 10000 | 0.89 | 0.75 | 0.25 | 5006 | 3750 | 625 | 4.74  | 0.7440 | 0.7560 | 0.2440 | 0.2560 | 5535 | 3809 | 655 | 5715 | 3689 | 595 | 52.90  | 90.46  |
| 10000 | 0.90 | 0.75 | 0.25 | 5063 | 3750 | 625 | 3.88  | 0.7440 | 0.7560 | 0.2440 | 0.2560 | 5535 | 3809 | 655 | 5715 | 3689 | 595 | 42.72  | 77.06  |
| 10000 | 0.91 | 0.75 | 0.25 | 5119 | 3750 | 625 | 3.11  | 0.7440 | 0.7560 | 0.2440 | 0.2560 | 5535 | 3809 | 655 | 5715 | 3689 | 595 | 33.68  | 64.76  |
| 10000 | 0.92 | 0.75 | 0.25 | 5175 | 3750 | 625 | 2.43  | 0.7440 | 0.7560 | 0.2440 | 0.2560 | 5535 | 3809 | 655 | 5715 | 3689 | 595 | 25.79  | 53.57  |
| 10000 | 0.93 | 0.75 | 0.25 | 5231 | 3750 | 625 | 1.84  | 0.7440 | 0.7560 | 0.2440 | 0.2560 | 5535 | 3809 | 655 | 5715 | 3689 | 595 | 19.04  | 43.48  |
| 10000 | 0.94 | 0.75 | 0.25 | 5288 | 3750 | 625 | 1.34  | 0.7440 | 0.7560 | 0.2440 | 0.2560 | 5535 | 3809 | 655 | 5715 | 3689 | 595 | 13.43  | 34.51  |
| 10000 | 0.95 | 0.75 | 0.25 | 5344 | 3750 | 625 | 0.92  | 0.7440 | 0.7560 | 0.2440 | 0.2560 | 5535 | 3809 | 655 | 5715 | 3689 | 595 | 8.96   | 26.64  |
| 10000 | 0.96 | 0.75 | 0.25 | 5400 | 3750 | 625 | 0.58  | 0.7440 | 0.7560 | 0.2440 | 0.2560 | 5535 | 3809 | 655 | 5715 | 3689 | 595 | 5.64   | 19.88  |
| 10000 | 0.97 | 0.75 | 0.25 | 5456 | 3750 | 625 | 0.33  | 0.7440 | 0.7560 | 0.2440 | 0.2560 | 5535 | 3809 | 655 | 5715 | 3689 | 595 | 3.46   | 14.22  |
| 10000 | 0.98 | 0.75 | 0.25 | 5513 | 3750 | 625 | 0.14  | 0.7440 | 0.7560 | 0.2440 | 0.2560 | 5535 | 3809 | 655 | 5715 | 3689 | 595 | 2.42   | 9.68   |
| 10000 | 0.99 | 0.75 | 0.25 | 5569 | 3750 | 625 | 0.04  | 0.7440 | 0.7560 | 0.2440 | 0.2560 | 5535 | 3809 | 655 | 5715 | 3689 | 595 | 2.53   | 6.24   |
| 10000 | 1.00 | 0.75 | 0.25 | 5625 | 3750 | 625 | 0.00  | 0.7440 | 0.7560 | 0.2440 | 0.2560 | 5535 | 3809 | 655 | 5715 | 3689 | 595 | 3.78   | 3.91   |
| 10000 | 1.01 | 0.75 | 0.25 | 5681 | 3750 | 625 | 0.03  | 0.7440 | 0.7560 | 0.2440 | 0.2560 | 5535 | 3809 | 655 | 5715 | 3689 | 595 | 6.18   | 2.68   |
| 10000 | 1.02 | 0.75 | 0.25 | 5738 | 3750 | 625 | 0.14  | 0.7440 | 0.7560 | 0.2440 | 0.2560 | 5535 | 3809 | 655 | 5715 | 3689 | 595 | 9.71   | 2.56   |
| 10000 | 1.03 | 0.75 | 0.25 | 5794 | 3750 | 625 | 0.31  | 0.7440 | 0.7560 | 0.2440 | 0.2560 | 5535 | 3809 | 655 | 5715 | 3689 | 595 | 14.39  | 3.55   |
| 10000 | 1.04 | 0.75 | 0.25 | 5850 | 3750 | 625 | 0.54  | 0.7440 | 0.7560 | 0.2440 | 0.2560 | 5535 | 3809 | 655 | 5715 | 3689 | 595 | 20.22  | 5.65   |
| 10000 | 1.05 | 0.75 | 0.25 | 5906 | 3750 | 625 | 0.84  | 0.7440 | 0.7560 | 0.2440 | 0.2560 | 5535 | 3809 | 655 | 5715 | 3689 | 595 | 27.18  | 8.85   |
| 10000 | 1.06 | 0.75 | 0.25 | 5963 | 3750 | 625 | 1.20  | 0.7440 | 0.7560 | 0.2440 | 0.2560 | 5535 | 3809 | 655 | 5715 | 3689 | 595 | 35.29  | 13.16  |
| 10000 | 1.07 | 0.75 | 0.25 | 6019 | 3750 | 625 | 1.62  | 0.7440 | 0.7560 | 0.2440 | 0.2560 | 5535 | 3809 | 655 | 5715 | 3689 | 595 | 44.55  | 18.58  |
| 10000 | 1.08 | 0.75 | 0.25 | 6075 | 3750 | 625 | 2.09  | 0.7440 | 0.7560 | 0.2440 | 0.2560 | 5535 | 3809 | 655 | 5715 | 3689 | 595 | 54.94  | 25.10  |
| 10000 | 1.09 | 0.75 | 0.25 | 6131 | 3750 | 625 | 2.63  | 0.7440 | 0.7560 | 0.2440 | 0.2560 | 5535 | 3809 | 655 | 5715 | 3689 | 595 | 66.48  | 32.74  |
| 10000 | 1.10 | 0.75 | 0.25 | 6188 | 3750 | 625 | 3.21  | 0.7440 | 0.7560 | 0.2440 | 0.2560 | 5535 | 3809 | 655 | 5715 | 3689 | 595 | 79.17  | 41.48  |
| 10000 | 1.11 | 0.75 | 0.25 | 6244 | 3750 | 625 | 3.85  | 0.7440 | 0.7560 | 0.2440 | 0.2560 | 5535 | 3809 | 655 | 5715 | 3689 | 595 | 92.99  | 51.32  |
| 10000 | 1.12 | 0.75 | 0.25 | 6300 | 3750 | 625 | 4.55  | 0.7440 | 0.7560 | 0.2440 | 0.2560 | 5535 | 3809 | 655 | 5715 | 3689 | 595 | 107.96 | 62.28  |

|       |      |      |      |      |      |     |       |        |        |        |        |      |      |     |      |      |     |        |        |
|-------|------|------|------|------|------|-----|-------|--------|--------|--------|--------|------|------|-----|------|------|-----|--------|--------|
| 10000 | 1.13 | 0.75 | 0.25 | 6356 | 3750 | 625 | 5.29  | 0.7440 | 0.7560 | 0.2440 | 0.2560 | 5535 | 3809 | 655 | 5715 | 3689 | 595 | 124.07 | 74.34  |
| 10000 | 1.14 | 0.75 | 0.25 | 6413 | 3750 | 625 | 6.09  | 0.7440 | 0.7560 | 0.2440 | 0.2560 | 5535 | 3809 | 655 | 5715 | 3689 | 595 | 141.33 | 87.51  |
| 10000 | 1.15 | 0.75 | 0.25 | 6469 | 3750 | 625 | 6.93  | 0.7440 | 0.7560 | 0.2440 | 0.2560 | 5535 | 3809 | 655 | 5715 | 3689 | 595 | 159.73 | 101.78 |
| 10000 | 1.16 | 0.75 | 0.25 | 6525 | 3750 | 625 | 7.82  | 0.7440 | 0.7560 | 0.2440 | 0.2560 | 5535 | 3809 | 655 | 5715 | 3689 | 595 | 179.27 | 117.16 |
| 10000 | 1.17 | 0.75 | 0.25 | 6581 | 3750 | 625 | 8.76  | 0.7440 | 0.7560 | 0.2440 | 0.2560 | 5535 | 3809 | 655 | 5715 | 3689 | 595 | 199.96 | 133.65 |
| 10000 | 1.18 | 0.75 | 0.25 | 6638 | 3750 | 625 | 9.74  | 0.7440 | 0.7560 | 0.2440 | 0.2560 | 5535 | 3809 | 655 | 5715 | 3689 | 595 | 221.78 | 151.25 |
| 10000 | 1.19 | 0.75 | 0.25 | 6694 | 3750 | 625 | 10.76 | 0.7440 | 0.7560 | 0.2440 | 0.2560 | 5535 | 3809 | 655 | 5715 | 3689 | 595 | 244.76 | 169.96 |
| 10000 | 1.20 | 0.75 | 0.25 | 6750 | 3750 | 625 | 11.83 | 0.7440 | 0.7560 | 0.2440 | 0.2560 | 5535 | 3809 | 655 | 5715 | 3689 | 595 | 268.87 | 189.77 |
| 10000 | 0.80 | 0.8  | 0.2  | 5120 | 3200 | 400 | 12.65 | 0.7945 | 0.8055 | 0.1945 | 0.2055 | 6312 | 3266 | 422 | 6489 | 3133 | 378 | 227.50 | 291.53 |
| 10000 | 0.81 | 0.8  | 0.2  | 5184 | 3200 | 400 | 11.29 | 0.7945 | 0.8055 | 0.1945 | 0.2055 | 6312 | 3266 | 422 | 6489 | 3133 | 378 | 203.98 | 265.15 |
| 10000 | 0.82 | 0.8  | 0.2  | 5248 | 3200 | 400 | 10.02 | 0.7945 | 0.8055 | 0.1945 | 0.2055 | 6312 | 3266 | 422 | 6489 | 3133 | 378 | 181.76 | 240.04 |
| 10000 | 0.83 | 0.8  | 0.2  | 5312 | 3200 | 400 | 8.83  | 0.7945 | 0.8055 | 0.1945 | 0.2055 | 6312 | 3266 | 422 | 6489 | 3133 | 378 | 160.84 | 216.19 |
| 10000 | 0.84 | 0.8  | 0.2  | 5376 | 3200 | 400 | 7.74  | 0.7945 | 0.8055 | 0.1945 | 0.2055 | 6312 | 3266 | 422 | 6489 | 3133 | 378 | 141.22 | 193.61 |
| 10000 | 0.85 | 0.8  | 0.2  | 5440 | 3200 | 400 | 6.72  | 0.7945 | 0.8055 | 0.1945 | 0.2055 | 6312 | 3266 | 422 | 6489 | 3133 | 378 | 122.89 | 172.28 |
| 10000 | 0.86 | 0.8  | 0.2  | 5504 | 3200 | 400 | 5.79  | 0.7945 | 0.8055 | 0.1945 | 0.2055 | 6312 | 3266 | 422 | 6489 | 3133 | 378 | 105.86 | 152.22 |
| 10000 | 0.87 | 0.8  | 0.2  | 5568 | 3200 | 400 | 4.94  | 0.7945 | 0.8055 | 0.1945 | 0.2055 | 6312 | 3266 | 422 | 6489 | 3133 | 378 | 90.14  | 133.43 |
| 10000 | 0.88 | 0.8  | 0.2  | 5632 | 3200 | 400 | 4.16  | 0.7945 | 0.8055 | 0.1945 | 0.2055 | 6312 | 3266 | 422 | 6489 | 3133 | 378 | 75.70  | 115.89 |
| 10000 | 0.89 | 0.8  | 0.2  | 5696 | 3200 | 400 | 3.46  | 0.7945 | 0.8055 | 0.1945 | 0.2055 | 6312 | 3266 | 422 | 6489 | 3133 | 378 | 62.57  | 99.62  |
| 10000 | 0.90 | 0.8  | 0.2  | 5760 | 3200 | 400 | 2.83  | 0.7945 | 0.8055 | 0.1945 | 0.2055 | 6312 | 3266 | 422 | 6489 | 3133 | 378 | 50.73  | 84.60  |
| 10000 | 0.91 | 0.8  | 0.2  | 5824 | 3200 | 400 | 2.27  | 0.7945 | 0.8055 | 0.1945 | 0.2055 | 6312 | 3266 | 422 | 6489 | 3133 | 378 | 40.20  | 70.85  |
| 10000 | 0.92 | 0.8  | 0.2  | 5888 | 3200 | 400 | 1.77  | 0.7945 | 0.8055 | 0.1945 | 0.2055 | 6312 | 3266 | 422 | 6489 | 3133 | 378 | 30.96  | 58.37  |
| 10000 | 0.93 | 0.8  | 0.2  | 5952 | 3200 | 400 | 1.34  | 0.7945 | 0.8055 | 0.1945 | 0.2055 | 6312 | 3266 | 422 | 6489 | 3133 | 378 | 23.02  | 47.14  |
| 10000 | 0.94 | 0.8  | 0.2  | 6016 | 3200 | 400 | 0.98  | 0.7945 | 0.8055 | 0.1945 | 0.2055 | 6312 | 3266 | 422 | 6489 | 3133 | 378 | 16.37  | 37.18  |
| 10000 | 0.95 | 0.8  | 0.2  | 6080 | 3200 | 400 | 0.67  | 0.7945 | 0.8055 | 0.1945 | 0.2055 | 6312 | 3266 | 422 | 6489 | 3133 | 378 | 11.03  | 28.48  |
| 10000 | 0.96 | 0.8  | 0.2  | 6144 | 3200 | 400 | 0.43  | 0.7945 | 0.8055 | 0.1945 | 0.2055 | 6312 | 3266 | 422 | 6489 | 3133 | 378 | 6.98   | 21.05  |
| 10000 | 0.97 | 0.8  | 0.2  | 6208 | 3200 | 400 | 0.24  | 0.7945 | 0.8055 | 0.1945 | 0.2055 | 6312 | 3266 | 422 | 6489 | 3133 | 378 | 4.23   | 14.87  |
| 10000 | 0.98 | 0.8  | 0.2  | 6272 | 3200 | 400 | 0.10  | 0.7945 | 0.8055 | 0.1945 | 0.2055 | 6312 | 3266 | 422 | 6489 | 3133 | 378 | 2.78   | 9.96   |
| 10000 | 0.99 | 0.8  | 0.2  | 6336 | 3200 | 400 | 0.03  | 0.7945 | 0.8055 | 0.1945 | 0.2055 | 6312 | 3266 | 422 | 6489 | 3133 | 378 | 2.62   | 6.31   |
| 10000 | 1.00 | 0.8  | 0.2  | 6400 | 3200 | 400 | 0.00  | 0.7945 | 0.8055 | 0.1945 | 0.2055 | 6312 | 3266 | 422 | 6489 | 3133 | 378 | 3.76   | 3.92   |
| 10000 | 1.01 | 0.8  | 0.2  | 6464 | 3200 | 400 | 0.03  | 0.7945 | 0.8055 | 0.1945 | 0.2055 | 6312 | 3266 | 422 | 6489 | 3133 | 378 | 6.21   | 2.80   |
| 10000 | 1.02 | 0.8  | 0.2  | 6528 | 3200 | 400 | 0.10  | 0.7945 | 0.8055 | 0.1945 | 0.2055 | 6312 | 3266 | 422 | 6489 | 3133 | 378 | 9.95   | 2.94   |
| 10000 | 1.03 | 0.8  | 0.2  | 6592 | 3200 | 400 | 0.22  | 0.7945 | 0.8055 | 0.1945 | 0.2055 | 6312 | 3266 | 422 | 6489 | 3133 | 378 | 14.98  | 4.34   |
| 10000 | 1.04 | 0.8  | 0.2  | 6656 | 3200 | 400 | 0.39  | 0.7945 | 0.8055 | 0.1945 | 0.2055 | 6312 | 3266 | 422 | 6489 | 3133 | 378 | 21.32  | 7.00   |
| 10000 | 1.05 | 0.8  | 0.2  | 6720 | 3200 | 400 | 0.61  | 0.7945 | 0.8055 | 0.1945 | 0.2055 | 6312 | 3266 | 422 | 6489 | 3133 | 378 | 28.95  | 10.93  |
| 10000 | 1.06 | 0.8  | 0.2  | 6784 | 3200 | 400 | 0.87  | 0.7945 | 0.8055 | 0.1945 | 0.2055 | 6312 | 3266 | 422 | 6489 | 3133 | 378 | 37.88  | 16.11  |

|       |      |      |      |      |      |     |      |        |        |        |        |      |      |     |      |      |     |        |        |
|-------|------|------|------|------|------|-----|------|--------|--------|--------|--------|------|------|-----|------|------|-----|--------|--------|
| 10000 | 1.07 | 0.8  | 0.2  | 6848 | 3200 | 400 | 1.18 | 0.7945 | 0.8055 | 0.1945 | 0.2055 | 6312 | 3266 | 422 | 6489 | 3133 | 378 | 48.11  | 22.56  |
| 10000 | 1.08 | 0.8  | 0.2  | 6912 | 3200 | 400 | 1.52 | 0.7945 | 0.8055 | 0.1945 | 0.2055 | 6312 | 3266 | 422 | 6489 | 3133 | 378 | 59.64  | 30.28  |
| 10000 | 1.09 | 0.8  | 0.2  | 6976 | 3200 | 400 | 1.91 | 0.7945 | 0.8055 | 0.1945 | 0.2055 | 6312 | 3266 | 422 | 6489 | 3133 | 378 | 72.46  | 39.25  |
| 10000 | 1.10 | 0.8  | 0.2  | 7040 | 3200 | 400 | 2.34 | 0.7945 | 0.8055 | 0.1945 | 0.2055 | 6312 | 3266 | 422 | 6489 | 3133 | 378 | 86.59  | 49.49  |
| 10000 | 1.11 | 0.8  | 0.2  | 7104 | 3200 | 400 | 2.80 | 0.7945 | 0.8055 | 0.1945 | 0.2055 | 6312 | 3266 | 422 | 6489 | 3133 | 378 | 102.01 | 60.99  |
| 10000 | 1.12 | 0.8  | 0.2  | 7168 | 3200 | 400 | 3.30 | 0.7945 | 0.8055 | 0.1945 | 0.2055 | 6312 | 3266 | 422 | 6489 | 3133 | 378 | 118.73 | 73.75  |
| 10000 | 1.13 | 0.8  | 0.2  | 7232 | 3200 | 400 | 3.85 | 0.7945 | 0.8055 | 0.1945 | 0.2055 | 6312 | 3266 | 422 | 6489 | 3133 | 378 | 136.74 | 87.78  |
| 10000 | 1.14 | 0.8  | 0.2  | 7296 | 3200 | 400 | 4.42 | 0.7945 | 0.8055 | 0.1945 | 0.2055 | 6312 | 3266 | 422 | 6489 | 3133 | 378 | 156.06 | 103.06 |
| 10000 | 1.15 | 0.8  | 0.2  | 7360 | 3200 | 400 | 5.03 | 0.7945 | 0.8055 | 0.1945 | 0.2055 | 6312 | 3266 | 422 | 6489 | 3133 | 378 | 176.67 | 119.61 |
| 10000 | 1.16 | 0.8  | 0.2  | 7424 | 3200 | 400 | 5.68 | 0.7945 | 0.8055 | 0.1945 | 0.2055 | 6312 | 3266 | 422 | 6489 | 3133 | 378 | 198.58 | 137.43 |
| 10000 | 1.17 | 0.8  | 0.2  | 7488 | 3200 | 400 | 6.36 | 0.7945 | 0.8055 | 0.1945 | 0.2055 | 6312 | 3266 | 422 | 6489 | 3133 | 378 | 221.79 | 156.50 |
| 10000 | 1.18 | 0.8  | 0.2  | 7552 | 3200 | 400 | 7.07 | 0.7945 | 0.8055 | 0.1945 | 0.2055 | 6312 | 3266 | 422 | 6489 | 3133 | 378 | 246.30 | 176.84 |
| 10000 | 1.19 | 0.8  | 0.2  | 7616 | 3200 | 400 | 7.81 | 0.7945 | 0.8055 | 0.1945 | 0.2055 | 6312 | 3266 | 422 | 6489 | 3133 | 378 | 272.10 | 198.44 |
| 10000 | 1.20 | 0.8  | 0.2  | 7680 | 3200 | 400 | 8.58 | 0.7945 | 0.8055 | 0.1945 | 0.2055 | 6312 | 3266 | 422 | 6489 | 3133 | 378 | 299.20 | 221.30 |
| 10000 | 0.80 | 0.85 | 0.15 | 5780 | 2550 | 225 | 8.08 | 0.8451 | 0.8549 | 0.1451 | 0.1549 | 7141 | 2619 | 240 | 7309 | 2480 | 210 | 262.19 | 322.97 |
| 10000 | 0.81 | 0.85 | 0.15 | 5852 | 2550 | 225 | 7.20 | 0.8451 | 0.8549 | 0.1451 | 0.1549 | 7141 | 2619 | 240 | 7309 | 2480 | 210 | 235.38 | 293.45 |
| 10000 | 0.82 | 0.85 | 0.15 | 5925 | 2550 | 225 | 6.39 | 0.8451 | 0.8549 | 0.1451 | 0.1549 | 7141 | 2619 | 240 | 7309 | 2480 | 210 | 210.03 | 265.36 |
| 10000 | 0.83 | 0.85 | 0.15 | 5997 | 2550 | 225 | 5.63 | 0.8451 | 0.8549 | 0.1451 | 0.1549 | 7141 | 2619 | 240 | 7309 | 2480 | 210 | 186.14 | 238.70 |
| 10000 | 0.84 | 0.85 | 0.15 | 6069 | 2550 | 225 | 4.93 | 0.8451 | 0.8549 | 0.1451 | 0.1549 | 7141 | 2619 | 240 | 7309 | 2480 | 210 | 163.72 | 213.46 |
| 10000 | 0.85 | 0.85 | 0.15 | 6141 | 2550 | 225 | 4.28 | 0.8451 | 0.8549 | 0.1451 | 0.1549 | 7141 | 2619 | 240 | 7309 | 2480 | 210 | 142.75 | 189.66 |
| 10000 | 0.86 | 0.85 | 0.15 | 6214 | 2550 | 225 | 3.69 | 0.8451 | 0.8549 | 0.1451 | 0.1549 | 7141 | 2619 | 240 | 7309 | 2480 | 210 | 123.25 | 167.28 |
| 10000 | 0.87 | 0.85 | 0.15 | 6286 | 2550 | 225 | 3.15 | 0.8451 | 0.8549 | 0.1451 | 0.1549 | 7141 | 2619 | 240 | 7309 | 2480 | 210 | 105.21 | 146.33 |
| 10000 | 0.88 | 0.85 | 0.15 | 6358 | 2550 | 225 | 2.65 | 0.8451 | 0.8549 | 0.1451 | 0.1549 | 7141 | 2619 | 240 | 7309 | 2480 | 210 | 88.63  | 126.81 |
| 10000 | 0.89 | 0.85 | 0.15 | 6430 | 2550 | 225 | 2.20 | 0.8451 | 0.8549 | 0.1451 | 0.1549 | 7141 | 2619 | 240 | 7309 | 2480 | 210 | 73.52  | 108.71 |
| 10000 | 0.90 | 0.85 | 0.15 | 6503 | 2550 | 225 | 1.80 | 0.8451 | 0.8549 | 0.1451 | 0.1549 | 7141 | 2619 | 240 | 7309 | 2480 | 210 | 59.87  | 92.05  |
| 10000 | 0.91 | 0.85 | 0.15 | 6575 | 2550 | 225 | 1.44 | 0.8451 | 0.8549 | 0.1451 | 0.1549 | 7141 | 2619 | 240 | 7309 | 2480 | 210 | 47.67  | 76.81  |
| 10000 | 0.92 | 0.85 | 0.15 | 6647 | 2550 | 225 | 1.13 | 0.8451 | 0.8549 | 0.1451 | 0.1549 | 7141 | 2619 | 240 | 7309 | 2480 | 210 | 36.95  | 63.00  |
| 10000 | 0.93 | 0.85 | 0.15 | 6719 | 2550 | 225 | 0.85 | 0.8451 | 0.8549 | 0.1451 | 0.1549 | 7141 | 2619 | 240 | 7309 | 2480 | 210 | 27.68  | 50.62  |
| 10000 | 0.94 | 0.85 | 0.15 | 6792 | 2550 | 225 | 0.62 | 0.8451 | 0.8549 | 0.1451 | 0.1549 | 7141 | 2619 | 240 | 7309 | 2480 | 210 | 19.87  | 39.67  |
| 10000 | 0.95 | 0.85 | 0.15 | 6864 | 2550 | 225 | 0.43 | 0.8451 | 0.8549 | 0.1451 | 0.1549 | 7141 | 2619 | 240 | 7309 | 2480 | 210 | 13.53  | 30.14  |
| 10000 | 0.96 | 0.85 | 0.15 | 6936 | 2550 | 225 | 0.27 | 0.8451 | 0.8549 | 0.1451 | 0.1549 | 7141 | 2619 | 240 | 7309 | 2480 | 210 | 8.65   | 22.05  |
| 10000 | 0.97 | 0.85 | 0.15 | 7008 | 2550 | 225 | 0.15 | 0.8451 | 0.8549 | 0.1451 | 0.1549 | 7141 | 2619 | 240 | 7309 | 2480 | 210 | 5.23   | 15.38  |
| 10000 | 0.98 | 0.85 | 0.15 | 7081 | 2550 | 225 | 0.07 | 0.8451 | 0.8549 | 0.1451 | 0.1549 | 7141 | 2619 | 240 | 7309 | 2480 | 210 | 3.27   | 10.14  |
| 10000 | 0.99 | 0.85 | 0.15 | 7153 | 2550 | 225 | 0.02 | 0.8451 | 0.8549 | 0.1451 | 0.1549 | 7141 | 2619 | 240 | 7309 | 2480 | 210 | 2.77   | 6.33   |
| 10000 | 1.00 | 0.85 | 0.15 | 7225 | 2550 | 225 | 0.00 | 0.8451 | 0.8549 | 0.1451 | 0.1549 | 7141 | 2619 | 240 | 7309 | 2480 | 210 | 3.74   | 3.95   |

|       |      |      |      |      |      |     |      |        |        |        |        |      |      |     |      |      |     |        |        |
|-------|------|------|------|------|------|-----|------|--------|--------|--------|--------|------|------|-----|------|------|-----|--------|--------|
| 10000 | 1.01 | 0.85 | 0.15 | 7297 | 2550 | 225 | 0.02 | 0.8451 | 0.8549 | 0.1451 | 0.1549 | 7141 | 2619 | 240 | 7309 | 2480 | 210 | 6.17   | 3.00   |
| 10000 | 1.02 | 0.85 | 0.15 | 7370 | 2550 | 225 | 0.06 | 0.8451 | 0.8549 | 0.1451 | 0.1549 | 7141 | 2619 | 240 | 7309 | 2480 | 210 | 10.06  | 3.47   |
| 10000 | 1.03 | 0.85 | 0.15 | 7442 | 2550 | 225 | 0.14 | 0.8451 | 0.8549 | 0.1451 | 0.1549 | 7141 | 2619 | 240 | 7309 | 2480 | 210 | 15.41  | 5.37   |
| 10000 | 1.04 | 0.85 | 0.15 | 7514 | 2550 | 225 | 0.25 | 0.8451 | 0.8549 | 0.1451 | 0.1549 | 7141 | 2619 | 240 | 7309 | 2480 | 210 | 22.23  | 8.70   |
| 10000 | 1.05 | 0.85 | 0.15 | 7586 | 2550 | 225 | 0.39 | 0.8451 | 0.8549 | 0.1451 | 0.1549 | 7141 | 2619 | 240 | 7309 | 2480 | 210 | 30.50  | 13.46  |
| 10000 | 1.06 | 0.85 | 0.15 | 7659 | 2550 | 225 | 0.55 | 0.8451 | 0.8549 | 0.1451 | 0.1549 | 7141 | 2619 | 240 | 7309 | 2480 | 210 | 40.24  | 19.65  |
| 10000 | 1.07 | 0.85 | 0.15 | 7731 | 2550 | 225 | 0.75 | 0.8451 | 0.8549 | 0.1451 | 0.1549 | 7141 | 2619 | 240 | 7309 | 2480 | 210 | 51.44  | 27.27  |
| 10000 | 1.08 | 0.85 | 0.15 | 7803 | 2550 | 225 | 0.96 | 0.8451 | 0.8549 | 0.1451 | 0.1549 | 7141 | 2619 | 240 | 7309 | 2480 | 210 | 64.10  | 36.31  |
| 10000 | 1.09 | 0.85 | 0.15 | 7875 | 2550 | 225 | 1.21 | 0.8451 | 0.8549 | 0.1451 | 0.1549 | 7141 | 2619 | 240 | 7309 | 2480 | 210 | 78.23  | 46.79  |
| 10000 | 1.10 | 0.85 | 0.15 | 7948 | 2550 | 225 | 1.48 | 0.8451 | 0.8549 | 0.1451 | 0.1549 | 7141 | 2619 | 240 | 7309 | 2480 | 210 | 93.81  | 58.69  |
| 10000 | 1.11 | 0.85 | 0.15 | 8020 | 2550 | 225 | 1.78 | 0.8451 | 0.8549 | 0.1451 | 0.1549 | 7141 | 2619 | 240 | 7309 | 2480 | 210 | 110.86 | 72.02  |
| 10000 | 1.12 | 0.85 | 0.15 | 8092 | 2550 | 225 | 2.09 | 0.8451 | 0.8549 | 0.1451 | 0.1549 | 7141 | 2619 | 240 | 7309 | 2480 | 210 | 129.37 | 86.77  |
| 10000 | 1.13 | 0.85 | 0.15 | 8164 | 2550 | 225 | 2.44 | 0.8451 | 0.8549 | 0.1451 | 0.1549 | 7141 | 2619 | 240 | 7309 | 2480 | 210 | 149.34 | 102.96 |
| 10000 | 1.14 | 0.85 | 0.15 | 8237 | 2550 | 225 | 2.80 | 0.8451 | 0.8549 | 0.1451 | 0.1549 | 7141 | 2619 | 240 | 7309 | 2480 | 210 | 170.78 | 120.57 |
| 10000 | 1.15 | 0.85 | 0.15 | 8309 | 2550 | 225 | 3.19 | 0.8451 | 0.8549 | 0.1451 | 0.1549 | 7141 | 2619 | 240 | 7309 | 2480 | 210 | 193.67 | 139.62 |
| 10000 | 1.16 | 0.85 | 0.15 | 8381 | 2550 | 225 | 3.60 | 0.8451 | 0.8549 | 0.1451 | 0.1549 | 7141 | 2619 | 240 | 7309 | 2480 | 210 | 218.03 | 160.09 |
| 10000 | 1.17 | 0.85 | 0.15 | 8453 | 2550 | 225 | 4.03 | 0.8451 | 0.8549 | 0.1451 | 0.1549 | 7141 | 2619 | 240 | 7309 | 2480 | 210 | 243.85 | 181.99 |
| 10000 | 1.18 | 0.85 | 0.15 | 8526 | 2550 | 225 | 4.48 | 0.8451 | 0.8549 | 0.1451 | 0.1549 | 7141 | 2619 | 240 | 7309 | 2480 | 210 | 271.13 | 205.31 |
| 10000 | 1.19 | 0.85 | 0.15 | 8598 | 2550 | 225 | 4.95 | 0.8451 | 0.8549 | 0.1451 | 0.1549 | 7141 | 2619 | 240 | 7309 | 2480 | 210 | 299.88 | 230.07 |
| 10000 | 1.20 | 0.85 | 0.15 | 8670 | 2550 | 225 | 5.44 | 0.8451 | 0.8549 | 0.1451 | 0.1549 | 7141 | 2619 | 240 | 7309 | 2480 | 210 | 330.08 | 256.25 |
| 10000 | 0.80 | 0.9  | 0.1  | 6480 | 1800 | 100 | 4.04 | 0.8958 | 0.9042 | 0.0958 | 0.1042 | 8025 | 1866 | 108 | 8175 | 1733 | 92  | 300.58 | 354.75 |
| 10000 | 0.81 | 0.9  | 0.1  | 6561 | 1800 | 100 | 3.60 | 0.8958 | 0.9042 | 0.0958 | 0.1042 | 8025 | 1866 | 108 | 8175 | 1733 | 92  | 270.20 | 321.96 |
| 10000 | 0.82 | 0.9  | 0.1  | 6642 | 1800 | 100 | 3.19 | 0.8958 | 0.9042 | 0.0958 | 0.1042 | 8025 | 1866 | 108 | 8175 | 1733 | 92  | 241.46 | 290.78 |
| 10000 | 0.83 | 0.9  | 0.1  | 6723 | 1800 | 100 | 2.81 | 0.8958 | 0.9042 | 0.0958 | 0.1042 | 8025 | 1866 | 108 | 8175 | 1733 | 92  | 214.35 | 261.20 |
| 10000 | 0.84 | 0.9  | 0.1  | 6804 | 1800 | 100 | 2.46 | 0.8958 | 0.9042 | 0.0958 | 0.1042 | 8025 | 1866 | 108 | 8175 | 1733 | 92  | 188.88 | 233.23 |
| 10000 | 0.85 | 0.9  | 0.1  | 6885 | 1800 | 100 | 2.14 | 0.8958 | 0.9042 | 0.0958 | 0.1042 | 8025 | 1866 | 108 | 8175 | 1733 | 92  | 165.04 | 206.87 |
| 10000 | 0.86 | 0.9  | 0.1  | 6966 | 1800 | 100 | 1.84 | 0.8958 | 0.9042 | 0.0958 | 0.1042 | 8025 | 1866 | 108 | 8175 | 1733 | 92  | 142.84 | 182.10 |
| 10000 | 0.87 | 0.9  | 0.1  | 7047 | 1800 | 100 | 1.57 | 0.8958 | 0.9042 | 0.0958 | 0.1042 | 8025 | 1866 | 108 | 8175 | 1733 | 92  | 122.28 | 158.95 |
| 10000 | 0.88 | 0.9  | 0.1  | 7128 | 1800 | 100 | 1.32 | 0.8958 | 0.9042 | 0.0958 | 0.1042 | 8025 | 1866 | 108 | 8175 | 1733 | 92  | 103.34 | 137.40 |
| 10000 | 0.89 | 0.9  | 0.1  | 7209 | 1800 | 100 | 1.10 | 0.8958 | 0.9042 | 0.0958 | 0.1042 | 8025 | 1866 | 108 | 8175 | 1733 | 92  | 86.05  | 117.45 |
| 10000 | 0.90 | 0.9  | 0.1  | 7290 | 1800 | 100 | 0.90 | 0.8958 | 0.9042 | 0.0958 | 0.1042 | 8025 | 1866 | 108 | 8175 | 1733 | 92  | 70.39  | 99.11  |
| 10000 | 0.91 | 0.9  | 0.1  | 7371 | 1800 | 100 | 0.72 | 0.8958 | 0.9042 | 0.0958 | 0.1042 | 8025 | 1866 | 108 | 8175 | 1733 | 92  | 56.36  | 82.38  |
| 10000 | 0.92 | 0.9  | 0.1  | 7452 | 1800 | 100 | 0.56 | 0.8958 | 0.9042 | 0.0958 | 0.1042 | 8025 | 1866 | 108 | 8175 | 1733 | 92  | 43.97  | 67.25  |
| 10000 | 0.93 | 0.9  | 0.1  | 7533 | 1800 | 100 | 0.43 | 0.8958 | 0.9042 | 0.0958 | 0.1042 | 8025 | 1866 | 108 | 8175 | 1733 | 92  | 33.21  | 53.72  |
| 10000 | 0.94 | 0.9  | 0.1  | 7614 | 1800 | 100 | 0.31 | 0.8958 | 0.9042 | 0.0958 | 0.1042 | 8025 | 1866 | 108 | 8175 | 1733 | 92  | 24.09  | 41.80  |

|       |      |      |      |      |      |     |      |        |        |        |        |      |      |     |      |      |    |        |        |
|-------|------|------|------|------|------|-----|------|--------|--------|--------|--------|------|------|-----|------|------|----|--------|--------|
| 10000 | 0.95 | 0.9  | 0.1  | 7695 | 1800 | 100 | 0.21 | 0.8958 | 0.9042 | 0.0958 | 0.1042 | 8025 | 1866 | 108 | 8175 | 1733 | 92 | 16.61  | 31.49  |
| 10000 | 0.96 | 0.9  | 0.1  | 7776 | 1800 | 100 | 0.13 | 0.8958 | 0.9042 | 0.0958 | 0.1042 | 8025 | 1866 | 108 | 8175 | 1733 | 92 | 10.76  | 22.78  |
| 10000 | 0.97 | 0.9  | 0.1  | 7857 | 1800 | 100 | 0.08 | 0.8958 | 0.9042 | 0.0958 | 0.1042 | 8025 | 1866 | 108 | 8175 | 1733 | 92 | 6.54   | 15.67  |
| 10000 | 0.98 | 0.9  | 0.1  | 7938 | 1800 | 100 | 0.03 | 0.8958 | 0.9042 | 0.0958 | 0.1042 | 8025 | 1866 | 108 | 8175 | 1733 | 92 | 3.96   | 10.17  |
| 10000 | 0.99 | 0.9  | 0.1  | 8019 | 1800 | 100 | 0.01 | 0.8958 | 0.9042 | 0.0958 | 0.1042 | 8025 | 1866 | 108 | 8175 | 1733 | 92 | 3.02   | 6.28   |
| 10000 | 1.00 | 0.9  | 0.1  | 8100 | 1800 | 100 | 0.00 | 0.8958 | 0.9042 | 0.0958 | 0.1042 | 8025 | 1866 | 108 | 8175 | 1733 | 92 | 3.71   | 3.99   |
| 10000 | 1.01 | 0.9  | 0.1  | 8181 | 1800 | 100 | 0.01 | 0.8958 | 0.9042 | 0.0958 | 0.1042 | 8025 | 1866 | 108 | 8175 | 1733 | 92 | 6.03   | 3.31   |
| 10000 | 1.02 | 0.9  | 0.1  | 8262 | 1800 | 100 | 0.03 | 0.8958 | 0.9042 | 0.0958 | 0.1042 | 8025 | 1866 | 108 | 8175 | 1733 | 92 | 9.99   | 4.23   |
| 10000 | 1.03 | 0.9  | 0.1  | 8343 | 1800 | 100 | 0.07 | 0.8958 | 0.9042 | 0.0958 | 0.1042 | 8025 | 1866 | 108 | 8175 | 1733 | 92 | 15.59  | 6.75   |
| 10000 | 1.04 | 0.9  | 0.1  | 8424 | 1800 | 100 | 0.12 | 0.8958 | 0.9042 | 0.0958 | 0.1042 | 8025 | 1866 | 108 | 8175 | 1733 | 92 | 22.82  | 10.89  |
| 10000 | 1.05 | 0.9  | 0.1  | 8505 | 1800 | 100 | 0.19 | 0.8958 | 0.9042 | 0.0958 | 0.1042 | 8025 | 1866 | 108 | 8175 | 1733 | 92 | 31.68  | 16.62  |
| 10000 | 1.06 | 0.9  | 0.1  | 8586 | 1800 | 100 | 0.28 | 0.8958 | 0.9042 | 0.0958 | 0.1042 | 8025 | 1866 | 108 | 8175 | 1733 | 92 | 42.18  | 23.96  |
| 10000 | 1.07 | 0.9  | 0.1  | 8667 | 1800 | 100 | 0.37 | 0.8958 | 0.9042 | 0.0958 | 0.1042 | 8025 | 1866 | 108 | 8175 | 1733 | 92 | 54.32  | 32.91  |
| 10000 | 1.08 | 0.9  | 0.1  | 8748 | 1800 | 100 | 0.48 | 0.8958 | 0.9042 | 0.0958 | 0.1042 | 8025 | 1866 | 108 | 8175 | 1733 | 92 | 68.09  | 43.46  |
| 10000 | 1.09 | 0.9  | 0.1  | 8829 | 1800 | 100 | 0.60 | 0.8958 | 0.9042 | 0.0958 | 0.1042 | 8025 | 1866 | 108 | 8175 | 1733 | 92 | 83.49  | 55.62  |
| 10000 | 1.10 | 0.9  | 0.1  | 8910 | 1800 | 100 | 0.74 | 0.8958 | 0.9042 | 0.0958 | 0.1042 | 8025 | 1866 | 108 | 8175 | 1733 | 92 | 100.53 | 69.38  |
| 10000 | 1.11 | 0.9  | 0.1  | 8991 | 1800 | 100 | 0.88 | 0.8958 | 0.9042 | 0.0958 | 0.1042 | 8025 | 1866 | 108 | 8175 | 1733 | 92 | 119.21 | 84.75  |
| 10000 | 1.12 | 0.9  | 0.1  | 9072 | 1800 | 100 | 1.04 | 0.8958 | 0.9042 | 0.0958 | 0.1042 | 8025 | 1866 | 108 | 8175 | 1733 | 92 | 139.52 | 101.72 |
| 10000 | 1.13 | 0.9  | 0.1  | 9153 | 1800 | 100 | 1.21 | 0.8958 | 0.9042 | 0.0958 | 0.1042 | 8025 | 1866 | 108 | 8175 | 1733 | 92 | 161.46 | 120.30 |
| 10000 | 1.14 | 0.9  | 0.1  | 9234 | 1800 | 100 | 1.39 | 0.8958 | 0.9042 | 0.0958 | 0.1042 | 8025 | 1866 | 108 | 8175 | 1733 | 92 | 185.04 | 140.48 |
| 10000 | 1.15 | 0.9  | 0.1  | 9315 | 1800 | 100 | 1.59 | 0.8958 | 0.9042 | 0.0958 | 0.1042 | 8025 | 1866 | 108 | 8175 | 1733 | 92 | 210.26 | 162.27 |
| 10000 | 1.16 | 0.9  | 0.1  | 9396 | 1800 | 100 | 1.79 | 0.8958 | 0.9042 | 0.0958 | 0.1042 | 8025 | 1866 | 108 | 8175 | 1733 | 92 | 237.11 | 185.66 |
| 10000 | 1.17 | 0.9  | 0.1  | 9477 | 1800 | 100 | 2.00 | 0.8958 | 0.9042 | 0.0958 | 0.1042 | 8025 | 1866 | 108 | 8175 | 1733 | 92 | 265.60 | 210.66 |
| 10000 | 1.18 | 0.9  | 0.1  | 9558 | 1800 | 100 | 2.23 | 0.8958 | 0.9042 | 0.0958 | 0.1042 | 8025 | 1866 | 108 | 8175 | 1733 | 92 | 295.72 | 237.27 |
| 10000 | 1.19 | 0.9  | 0.1  | 9639 | 1800 | 100 | 2.46 | 0.8958 | 0.9042 | 0.0958 | 0.1042 | 8025 | 1866 | 108 | 8175 | 1733 | 92 | 327.47 | 265.47 |
| 10000 | 1.20 | 0.9  | 0.1  | 9720 | 1800 | 100 | 2.70 | 0.8958 | 0.9042 | 0.0958 | 0.1042 | 8025 | 1866 | 108 | 8175 | 1733 | 92 | 360.86 | 295.29 |
| 10000 | 0.80 | 0.95 | 0.05 | 7220 | 950  | 25  | 1.13 | 0.9470 | 0.9530 | 0.0470 | 0.0530 | 8968 | 1004 | 28  | 9082 | 895  | 22 | 343.88 | 385.64 |
| 10000 | 0.81 | 0.95 | 0.05 | 7310 | 950  | 25  | 1.00 | 0.9470 | 0.9530 | 0.0470 | 0.0530 | 8968 | 1004 | 28  | 9082 | 895  | 22 | 309.61 | 349.52 |
| 10000 | 0.82 | 0.95 | 0.05 | 7401 | 950  | 25  | 0.89 | 0.9470 | 0.9530 | 0.0470 | 0.0530 | 8968 | 1004 | 28  | 9082 | 895  | 22 | 277.15 | 315.20 |
| 10000 | 0.83 | 0.95 | 0.05 | 7491 | 950  | 25  | 0.79 | 0.9470 | 0.9530 | 0.0470 | 0.0530 | 8968 | 1004 | 28  | 9082 | 895  | 22 | 246.52 | 282.67 |
| 10000 | 0.84 | 0.95 | 0.05 | 7581 | 950  | 25  | 0.69 | 0.9470 | 0.9530 | 0.0470 | 0.0530 | 8968 | 1004 | 28  | 9082 | 895  | 22 | 217.70 | 251.93 |
| 10000 | 0.85 | 0.95 | 0.05 | 7671 | 950  | 25  | 0.60 | 0.9470 | 0.9530 | 0.0470 | 0.0530 | 8968 | 1004 | 28  | 9082 | 895  | 22 | 190.69 | 222.99 |
| 10000 | 0.86 | 0.95 | 0.05 | 7762 | 950  | 25  | 0.51 | 0.9470 | 0.9530 | 0.0470 | 0.0530 | 8968 | 1004 | 28  | 9082 | 895  | 22 | 165.51 | 195.84 |
| 10000 | 0.87 | 0.95 | 0.05 | 7852 | 950  | 25  | 0.44 | 0.9470 | 0.9530 | 0.0470 | 0.0530 | 8968 | 1004 | 28  | 9082 | 895  | 22 | 142.14 | 170.48 |
| 10000 | 0.88 | 0.95 | 0.05 | 7942 | 950  | 25  | 0.37 | 0.9470 | 0.9530 | 0.0470 | 0.0530 | 8968 | 1004 | 28  | 9082 | 895  | 22 | 120.59 | 146.92 |

|       |      |      |      |       |     |    |      |        |        |        |        |       |      |    |       |     |    |        |        |
|-------|------|------|------|-------|-----|----|------|--------|--------|--------|--------|-------|------|----|-------|-----|----|--------|--------|
| 10000 | 0.89 | 0.95 | 0.05 | 8032  | 950 | 25 | 0.31 | 0.9470 | 0.9530 | 0.0470 | 0.0530 | 8968  | 1004 | 28 | 9082  | 895 | 22 | 100.85 | 125.15 |
| 10000 | 0.90 | 0.95 | 0.05 | 8123  | 950 | 25 | 0.25 | 0.9470 | 0.9530 | 0.0470 | 0.0530 | 8968  | 1004 | 28 | 9082  | 895 | 22 | 82.93  | 105.18 |
| 10000 | 0.91 | 0.95 | 0.05 | 8213  | 950 | 25 | 0.20 | 0.9470 | 0.9530 | 0.0470 | 0.0530 | 8968  | 1004 | 28 | 9082  | 895 | 22 | 66.82  | 87.00  |
| 10000 | 0.92 | 0.95 | 0.05 | 8303  | 950 | 25 | 0.16 | 0.9470 | 0.9530 | 0.0470 | 0.0530 | 8968  | 1004 | 28 | 9082  | 895 | 22 | 52.54  | 70.61  |
| 10000 | 0.93 | 0.95 | 0.05 | 8393  | 950 | 25 | 0.12 | 0.9470 | 0.9530 | 0.0470 | 0.0530 | 8968  | 1004 | 28 | 9082  | 895 | 22 | 40.07  | 56.02  |
| 10000 | 0.94 | 0.95 | 0.05 | 8484  | 950 | 25 | 0.09 | 0.9470 | 0.9530 | 0.0470 | 0.0530 | 8968  | 1004 | 28 | 9082  | 895 | 22 | 29.41  | 43.21  |
| 10000 | 0.95 | 0.95 | 0.05 | 8574  | 950 | 25 | 0.06 | 0.9470 | 0.9530 | 0.0470 | 0.0530 | 8968  | 1004 | 28 | 9082  | 895 | 22 | 20.57  | 32.21  |
| 10000 | 0.96 | 0.95 | 0.05 | 8664  | 950 | 25 | 0.04 | 0.9470 | 0.9530 | 0.0470 | 0.0530 | 8968  | 1004 | 28 | 9082  | 895 | 22 | 13.55  | 22.99  |
| 10000 | 0.97 | 0.95 | 0.05 | 8754  | 950 | 25 | 0.02 | 0.9470 | 0.9530 | 0.0470 | 0.0530 | 8968  | 1004 | 28 | 9082  | 895 | 22 | 8.35   | 15.57  |
| 10000 | 0.98 | 0.95 | 0.05 | 8845  | 950 | 25 | 0.01 | 0.9470 | 0.9530 | 0.0470 | 0.0530 | 8968  | 1004 | 28 | 9082  | 895 | 22 | 4.96   | 9.95   |
| 10000 | 0.99 | 0.95 | 0.05 | 8935  | 950 | 25 | 0.00 | 0.9470 | 0.9530 | 0.0470 | 0.0530 | 8968  | 1004 | 28 | 9082  | 895 | 22 | 3.39   | 6.12   |
| 10000 | 1.00 | 0.95 | 0.05 | 9025  | 950 | 25 | 0.00 | 0.9470 | 0.9530 | 0.0470 | 0.0530 | 8968  | 1004 | 28 | 9082  | 895 | 22 | 3.63   | 4.08   |
| 10000 | 1.01 | 0.95 | 0.05 | 9115  | 950 | 25 | 0.00 | 0.9470 | 0.9530 | 0.0470 | 0.0530 | 8968  | 1004 | 28 | 9082  | 895 | 22 | 5.70   | 3.83   |
| 10000 | 1.02 | 0.95 | 0.05 | 9206  | 950 | 25 | 0.01 | 0.9470 | 0.9530 | 0.0470 | 0.0530 | 8968  | 1004 | 28 | 9082  | 895 | 22 | 9.57   | 5.38   |
| 10000 | 1.03 | 0.95 | 0.05 | 9296  | 950 | 25 | 0.02 | 0.9470 | 0.9530 | 0.0470 | 0.0530 | 8968  | 1004 | 28 | 9082  | 895 | 22 | 15.27  | 8.72   |
| 10000 | 1.04 | 0.95 | 0.05 | 9386  | 950 | 25 | 0.03 | 0.9470 | 0.9530 | 0.0470 | 0.0530 | 8968  | 1004 | 28 | 9082  | 895 | 22 | 22.78  | 13.86  |
| 10000 | 1.05 | 0.95 | 0.05 | 9476  | 950 | 25 | 0.05 | 0.9470 | 0.9530 | 0.0470 | 0.0530 | 8968  | 1004 | 28 | 9082  | 895 | 22 | 32.11  | 20.78  |
| 10000 | 1.06 | 0.95 | 0.05 | 9567  | 950 | 25 | 0.08 | 0.9470 | 0.9530 | 0.0470 | 0.0530 | 8968  | 1004 | 28 | 9082  | 895 | 22 | 43.25  | 29.51  |
| 10000 | 1.07 | 0.95 | 0.05 | 9657  | 950 | 25 | 0.10 | 0.9470 | 0.9530 | 0.0470 | 0.0530 | 8968  | 1004 | 28 | 9082  | 895 | 22 | 56.21  | 40.02  |
| 10000 | 1.08 | 0.95 | 0.05 | 9747  | 950 | 25 | 0.13 | 0.9470 | 0.9530 | 0.0470 | 0.0530 | 8968  | 1004 | 28 | 9082  | 895 | 22 | 70.99  | 52.33  |
| 10000 | 1.09 | 0.95 | 0.05 | 9837  | 950 | 25 | 0.17 | 0.9470 | 0.9530 | 0.0470 | 0.0530 | 8968  | 1004 | 28 | 9082  | 895 | 22 | 87.58  | 66.43  |
| 10000 | 1.10 | 0.95 | 0.05 | 9928  | 950 | 25 | 0.21 | 0.9470 | 0.9530 | 0.0470 | 0.0530 | 8968  | 1004 | 28 | 9082  | 895 | 22 | 105.99 | 82.33  |
| 10000 | 1.11 | 0.95 | 0.05 | 10018 | 950 | 25 | 0.25 | 0.9470 | 0.9530 | 0.0470 | 0.0530 | 8968  | 1004 | 28 | 9082  | 895 | 22 | 126.22 | 100.02 |
| 10000 | 1.12 | 0.95 | 0.05 | 10108 | 950 | 25 | 0.29 | 0.9470 | 0.9530 | 0.0470 | 0.0530 | 8968  | 1004 | 28 | 9082  | 895 | 22 | 148.26 | 119.51 |
| 10000 | 1.13 | 0.95 | 0.05 | 10198 | 950 | 25 | 0.34 | 0.9470 | 0.9530 | 0.0470 | 0.0530 | 8968  | 1004 | 28 | 9082  | 895 | 22 | 172.12 | 140.78 |
| 10000 | 1.14 | 0.95 | 0.05 | 10289 | 950 | 25 | 0.39 | 0.9470 | 0.9530 | 0.0470 | 0.0530 | 8968  | 1004 | 28 | 9082  | 895 | 22 | 197.80 | 163.85 |
| 10000 | 1.15 | 0.95 | 0.05 | 10379 | 950 | 25 | 0.44 | 0.9470 | 0.9530 | 0.0470 | 0.0530 | 8968  | 1004 | 28 | 9082  | 895 | 22 | 225.29 | 188.72 |
| 10000 | 1.16 | 0.95 | 0.05 | 10469 | 950 | 25 | 0.50 | 0.9470 | 0.9530 | 0.0470 | 0.0530 | 8968  | 1004 | 28 | 9082  | 895 | 22 | 254.60 | 215.38 |
| 10000 | 1.17 | 0.95 | 0.05 | 10559 | 950 | 25 | 0.56 | 0.9470 | 0.9530 | 0.0470 | 0.0530 | 8968  | 1004 | 28 | 9082  | 895 | 22 | 285.73 | 243.83 |
| 10000 | 1.18 | 0.95 | 0.05 | 10650 | 950 | 25 | 0.62 | 0.9470 | 0.9530 | 0.0470 | 0.0530 | 8968  | 1004 | 28 | 9082  | 895 | 22 | 318.67 | 274.07 |
| 10000 | 1.19 | 0.95 | 0.05 | 10740 | 950 | 25 | 0.68 | 0.9470 | 0.9530 | 0.0470 | 0.0530 | 8968  | 1004 | 28 | 9082  | 895 | 22 | 353.43 | 306.11 |
| 10000 | 1.20 | 0.95 | 0.05 | 10830 | 950 | 25 | 0.75 | 0.9470 | 0.9530 | 0.0470 | 0.0530 | 8968  | 1004 | 28 | 9082  | 895 | 22 | 390.01 | 339.94 |
| 10000 | 0.80 | 1    | 0    | 8000  | 0   | 0  | 0.75 | 1.0000 | 1.0000 | 0.0000 | 0.0000 | 10000 | 0    | 0  | 10000 | 0   | 0  | .      | .      |
| 10000 | 0.81 | 1    | 0    | 8100  | 0   | 0  | 0.75 | 1.0000 | 1.0000 | 0.0000 | 0.0000 | 10000 | 0    | 0  | 10000 | 0   | 0  | .      | .      |
| 10000 | 0.82 | 1    | 0    | 8200  | 0   | 0  | 0.75 | 1.0000 | 1.0000 | 0.0000 | 0.0000 | 10000 | 0    | 0  | 10000 | 0   | 0  | .      | .      |



|       |      |      |      |       |      |       |      |        |        |        |        |       |      |       |       |      |       |      |      |
|-------|------|------|------|-------|------|-------|------|--------|--------|--------|--------|-------|------|-------|-------|------|-------|------|------|
| 10000 | 1.18 | 1    | 0    | 11800 | 0    | 0     | 0.75 | 1.0000 | 1.0000 | 0.0000 | 0.0000 | 10000 | 0    | 0     | 10000 | 0    | 0     | .    | .    |
| 10000 | 1.19 | 1    | 0    | 11900 | 0    | 0     | 0.75 | 1.0000 | 1.0000 | 0.0000 | 0.0000 | 10000 | 0    | 0     | 10000 | 0    | 0     | .    | .    |
| 10000 | 1.20 | 1    | 0    | 12000 | 0    | 0     | 0.75 | 1.0000 | 1.0000 | 0.0000 | 0.0000 | 10000 | 0    | 0     | 10000 | 0    | 0     | .    | .    |
| 20000 | 0.80 | 0.05 | 0.95 | 40    | 1900 | 18050 | 1.84 | 0.0479 | 0.0521 | 0.9479 | 0.9521 | 46    | 1823 | 18131 | 54    | 1977 | 17969 | 4.36 | 7.14 |
| 20000 | 0.81 | 0.05 | 0.95 | 41    | 1900 | 18050 | 1.66 | 0.0479 | 0.0521 | 0.9479 | 0.9521 | 46    | 1823 | 18131 | 54    | 1977 | 17969 | 4.24 | 6.88 |
| 20000 | 0.82 | 0.05 | 0.95 | 41    | 1900 | 18050 | 1.49 | 0.0479 | 0.0521 | 0.9479 | 0.9521 | 46    | 1823 | 18131 | 54    | 1977 | 17969 | 4.13 | 6.63 |
| 20000 | 0.83 | 0.05 | 0.95 | 42    | 1900 | 18050 | 1.33 | 0.0479 | 0.0521 | 0.9479 | 0.9521 | 46    | 1823 | 18131 | 54    | 1977 | 17969 | 4.03 | 6.39 |
| 20000 | 0.84 | 0.05 | 0.95 | 42    | 1900 | 18050 | 1.17 | 0.0479 | 0.0521 | 0.9479 | 0.9521 | 46    | 1823 | 18131 | 54    | 1977 | 17969 | 3.94 | 6.15 |
| 20000 | 0.85 | 0.05 | 0.95 | 43    | 1900 | 18050 | 1.03 | 0.0479 | 0.0521 | 0.9479 | 0.9521 | 46    | 1823 | 18131 | 54    | 1977 | 17969 | 3.86 | 5.93 |
| 20000 | 0.86 | 0.05 | 0.95 | 43    | 1900 | 18050 | 0.90 | 0.0479 | 0.0521 | 0.9479 | 0.9521 | 46    | 1823 | 18131 | 54    | 1977 | 17969 | 3.80 | 5.72 |
| 20000 | 0.87 | 0.05 | 0.95 | 44    | 1900 | 18050 | 0.77 | 0.0479 | 0.0521 | 0.9479 | 0.9521 | 46    | 1823 | 18131 | 54    | 1977 | 17969 | 3.74 | 5.51 |
| 20000 | 0.88 | 0.05 | 0.95 | 44    | 1900 | 18050 | 0.66 | 0.0479 | 0.0521 | 0.9479 | 0.9521 | 46    | 1823 | 18131 | 54    | 1977 | 17969 | 3.70 | 5.32 |
| 20000 | 0.89 | 0.05 | 0.95 | 45    | 1900 | 18050 | 0.55 | 0.0479 | 0.0521 | 0.9479 | 0.9521 | 46    | 1823 | 18131 | 54    | 1977 | 17969 | 3.66 | 5.13 |
| 20000 | 0.90 | 0.05 | 0.95 | 45    | 1900 | 18050 | 0.46 | 0.0479 | 0.0521 | 0.9479 | 0.9521 | 46    | 1823 | 18131 | 54    | 1977 | 17969 | 3.64 | 4.96 |
| 20000 | 0.91 | 0.05 | 0.95 | 46    | 1900 | 18050 | 0.37 | 0.0479 | 0.0521 | 0.9479 | 0.9521 | 46    | 1823 | 18131 | 54    | 1977 | 17969 | 3.63 | 4.79 |
| 20000 | 0.92 | 0.05 | 0.95 | 46    | 1900 | 18050 | 0.29 | 0.0479 | 0.0521 | 0.9479 | 0.9521 | 46    | 1823 | 18131 | 54    | 1977 | 17969 | 3.62 | 4.63 |
| 20000 | 0.93 | 0.05 | 0.95 | 47    | 1900 | 18050 | 0.22 | 0.0479 | 0.0521 | 0.9479 | 0.9521 | 46    | 1823 | 18131 | 54    | 1977 | 17969 | 3.63 | 4.48 |
| 20000 | 0.94 | 0.05 | 0.95 | 47    | 1900 | 18050 | 0.16 | 0.0479 | 0.0521 | 0.9479 | 0.9521 | 46    | 1823 | 18131 | 54    | 1977 | 17969 | 3.65 | 4.34 |
| 20000 | 0.95 | 0.05 | 0.95 | 48    | 1900 | 18050 | 0.11 | 0.0479 | 0.0521 | 0.9479 | 0.9521 | 46    | 1823 | 18131 | 54    | 1977 | 17969 | 3.68 | 4.21 |
| 20000 | 0.96 | 0.05 | 0.95 | 48    | 1900 | 18050 | 0.07 | 0.0479 | 0.0521 | 0.9479 | 0.9521 | 46    | 1823 | 18131 | 54    | 1977 | 17969 | 3.73 | 4.09 |
| 20000 | 0.97 | 0.05 | 0.95 | 49    | 1900 | 18050 | 0.04 | 0.0479 | 0.0521 | 0.9479 | 0.9521 | 46    | 1823 | 18131 | 54    | 1977 | 17969 | 3.78 | 3.97 |
| 20000 | 0.98 | 0.05 | 0.95 | 49    | 1900 | 18050 | 0.02 | 0.0479 | 0.0521 | 0.9479 | 0.9521 | 46    | 1823 | 18131 | 54    | 1977 | 17969 | 3.84 | 3.87 |
| 20000 | 0.99 | 0.05 | 0.95 | 50    | 1900 | 18050 | 0.00 | 0.0479 | 0.0521 | 0.9479 | 0.9521 | 46    | 1823 | 18131 | 54    | 1977 | 17969 | 3.92 | 3.78 |
| 20000 | 1.00 | 0.05 | 0.95 | 50    | 1900 | 18050 | 0.00 | 0.0479 | 0.0521 | 0.9479 | 0.9521 | 46    | 1823 | 18131 | 54    | 1977 | 17969 | 4.00 | 3.69 |
| 20000 | 1.01 | 0.05 | 0.95 | 51    | 1900 | 18050 | 0.00 | 0.0479 | 0.0521 | 0.9479 | 0.9521 | 46    | 1823 | 18131 | 54    | 1977 | 17969 | 4.10 | 3.62 |
| 20000 | 1.02 | 0.05 | 0.95 | 51    | 1900 | 18050 | 0.02 | 0.0479 | 0.0521 | 0.9479 | 0.9521 | 46    | 1823 | 18131 | 54    | 1977 | 17969 | 4.21 | 3.55 |
| 20000 | 1.03 | 0.05 | 0.95 | 52    | 1900 | 18050 | 0.04 | 0.0479 | 0.0521 | 0.9479 | 0.9521 | 46    | 1823 | 18131 | 54    | 1977 | 17969 | 4.33 | 3.49 |
| 20000 | 1.04 | 0.05 | 0.95 | 52    | 1900 | 18050 | 0.07 | 0.0479 | 0.0521 | 0.9479 | 0.9521 | 46    | 1823 | 18131 | 54    | 1977 | 17969 | 4.46 | 3.45 |
| 20000 | 1.05 | 0.05 | 0.95 | 53    | 1900 | 18050 | 0.11 | 0.0479 | 0.0521 | 0.9479 | 0.9521 | 46    | 1823 | 18131 | 54    | 1977 | 17969 | 4.60 | 3.41 |
| 20000 | 1.06 | 0.05 | 0.95 | 53    | 1900 | 18050 | 0.16 | 0.0479 | 0.0521 | 0.9479 | 0.9521 | 46    | 1823 | 18131 | 54    | 1977 | 17969 | 4.75 | 3.38 |
| 20000 | 1.07 | 0.05 | 0.95 | 54    | 1900 | 18050 | 0.22 | 0.0479 | 0.0521 | 0.9479 | 0.9521 | 46    | 1823 | 18131 | 54    | 1977 | 17969 | 4.91 | 3.36 |
| 20000 | 1.08 | 0.05 | 0.95 | 54    | 1900 | 18050 | 0.29 | 0.0479 | 0.0521 | 0.9479 | 0.9521 | 46    | 1823 | 18131 | 54    | 1977 | 17969 | 5.08 | 3.34 |
| 20000 | 1.09 | 0.05 | 0.95 | 55    | 1900 | 18050 | 0.36 | 0.0479 | 0.0521 | 0.9479 | 0.9521 | 46    | 1823 | 18131 | 54    | 1977 | 17969 | 5.27 | 3.34 |
| 20000 | 1.10 | 0.05 | 0.95 | 55    | 1900 | 18050 | 0.45 | 0.0479 | 0.0521 | 0.9479 | 0.9521 | 46    | 1823 | 18131 | 54    | 1977 | 17969 | 5.46 | 3.35 |
| 20000 | 1.11 | 0.05 | 0.95 | 56    | 1900 | 18050 | 0.54 | 0.0479 | 0.0521 | 0.9479 | 0.9521 | 46    | 1823 | 18131 | 54    | 1977 | 17969 | 5.67 | 3.37 |



|       |      |      |      |     |      |       |      |        |        |        |        |     |      |       |     |      |       |      |       |
|-------|------|------|------|-----|------|-------|------|--------|--------|--------|--------|-----|------|-------|-----|------|-------|------|-------|
| 20000 | 1.12 | 0.05 | 0.95 | 56  | 1900 | 18050 | 0.64 | 0.0479 | 0.0521 | 0.9479 | 0.9521 | 46  | 1823 | 18131 | 54  | 1977 | 17969 | 5.88 | 3.39  |
| 20000 | 1.13 | 0.05 | 0.95 | 57  | 1900 | 18050 | 0.75 | 0.0479 | 0.0521 | 0.9479 | 0.9521 | 46  | 1823 | 18131 | 54  | 1977 | 17969 | 6.11 | 3.43  |
| 20000 | 1.14 | 0.05 | 0.95 | 57  | 1900 | 18050 | 0.87 | 0.0479 | 0.0521 | 0.9479 | 0.9521 | 46  | 1823 | 18131 | 54  | 1977 | 17969 | 6.35 | 3.47  |
| 20000 | 1.15 | 0.05 | 0.95 | 58  | 1900 | 18050 | 1.00 | 0.0479 | 0.0521 | 0.9479 | 0.9521 | 46  | 1823 | 18131 | 54  | 1977 | 17969 | 6.60 | 3.52  |
| 20000 | 1.16 | 0.05 | 0.95 | 58  | 1900 | 18050 | 1.14 | 0.0479 | 0.0521 | 0.9479 | 0.9521 | 46  | 1823 | 18131 | 54  | 1977 | 17969 | 6.86 | 3.59  |
| 20000 | 1.17 | 0.05 | 0.95 | 59  | 1900 | 18050 | 1.28 | 0.0479 | 0.0521 | 0.9479 | 0.9521 | 46  | 1823 | 18131 | 54  | 1977 | 17969 | 7.13 | 3.66  |
| 20000 | 1.18 | 0.05 | 0.95 | 59  | 1900 | 18050 | 1.44 | 0.0479 | 0.0521 | 0.9479 | 0.9521 | 46  | 1823 | 18131 | 54  | 1977 | 17969 | 7.41 | 3.74  |
| 20000 | 1.19 | 0.05 | 0.95 | 60  | 1900 | 18050 | 1.60 | 0.0479 | 0.0521 | 0.9479 | 0.9521 | 46  | 1823 | 18131 | 54  | 1977 | 17969 | 7.71 | 3.83  |
| 20000 | 1.20 | 0.05 | 0.95 | 60  | 1900 | 18050 | 1.77 | 0.0479 | 0.0521 | 0.9479 | 0.9521 | 46  | 1823 | 18131 | 54  | 1977 | 17969 | 8.01 | 3.93  |
| 20000 | 0.80 | 0.1  | 0.9  | 160 | 3600 | 16200 | 6.73 | 0.0971 | 0.1029 | 0.8971 | 0.9029 | 188 | 3506 | 16306 | 212 | 3694 | 16094 | 7.52 | 15.80 |
| 20000 | 0.81 | 0.1  | 0.9  | 162 | 3600 | 16200 | 6.07 | 0.0971 | 0.1029 | 0.8971 | 0.9029 | 188 | 3506 | 16306 | 212 | 3694 | 16094 | 6.94 | 14.84 |
| 20000 | 0.82 | 0.1  | 0.9  | 164 | 3600 | 16200 | 5.43 | 0.0971 | 0.1029 | 0.8971 | 0.9029 | 188 | 3506 | 16306 | 212 | 3694 | 16094 | 6.40 | 13.91 |
| 20000 | 0.83 | 0.1  | 0.9  | 166 | 3600 | 16200 | 4.84 | 0.0971 | 0.1029 | 0.8971 | 0.9029 | 188 | 3506 | 16306 | 212 | 3694 | 16094 | 5.90 | 13.03 |
| 20000 | 0.84 | 0.1  | 0.9  | 168 | 3600 | 16200 | 4.28 | 0.0971 | 0.1029 | 0.8971 | 0.9029 | 188 | 3506 | 16306 | 212 | 3694 | 16094 | 5.44 | 12.18 |
| 20000 | 0.85 | 0.1  | 0.9  | 170 | 3600 | 16200 | 3.75 | 0.0971 | 0.1029 | 0.8971 | 0.9029 | 188 | 3506 | 16306 | 212 | 3694 | 16094 | 5.03 | 11.37 |
| 20000 | 0.86 | 0.1  | 0.9  | 172 | 3600 | 16200 | 3.26 | 0.0971 | 0.1029 | 0.8971 | 0.9029 | 188 | 3506 | 16306 | 212 | 3694 | 16094 | 4.66 | 10.60 |
| 20000 | 0.87 | 0.1  | 0.9  | 174 | 3600 | 16200 | 2.81 | 0.0971 | 0.1029 | 0.8971 | 0.9029 | 188 | 3506 | 16306 | 212 | 3694 | 16094 | 4.34 | 9.86  |
| 20000 | 0.88 | 0.1  | 0.9  | 176 | 3600 | 16200 | 2.39 | 0.0971 | 0.1029 | 0.8971 | 0.9029 | 188 | 3506 | 16306 | 212 | 3694 | 16094 | 4.05 | 9.16  |
| 20000 | 0.89 | 0.1  | 0.9  | 178 | 3600 | 16200 | 2.00 | 0.0971 | 0.1029 | 0.8971 | 0.9029 | 188 | 3506 | 16306 | 212 | 3694 | 16094 | 3.81 | 8.51  |
| 20000 | 0.90 | 0.1  | 0.9  | 180 | 3600 | 16200 | 1.65 | 0.0971 | 0.1029 | 0.8971 | 0.9029 | 188 | 3506 | 16306 | 212 | 3694 | 16094 | 3.61 | 7.88  |
| 20000 | 0.91 | 0.1  | 0.9  | 182 | 3600 | 16200 | 1.33 | 0.0971 | 0.1029 | 0.8971 | 0.9029 | 188 | 3506 | 16306 | 212 | 3694 | 16094 | 3.45 | 7.30  |
| 20000 | 0.92 | 0.1  | 0.9  | 184 | 3600 | 16200 | 1.05 | 0.0971 | 0.1029 | 0.8971 | 0.9029 | 188 | 3506 | 16306 | 212 | 3694 | 16094 | 3.34 | 6.75  |
| 20000 | 0.93 | 0.1  | 0.9  | 186 | 3600 | 16200 | 0.80 | 0.0971 | 0.1029 | 0.8971 | 0.9029 | 188 | 3506 | 16306 | 212 | 3694 | 16094 | 3.26 | 6.25  |
| 20000 | 0.94 | 0.1  | 0.9  | 188 | 3600 | 16200 | 0.59 | 0.0971 | 0.1029 | 0.8971 | 0.9029 | 188 | 3506 | 16306 | 212 | 3694 | 16094 | 3.23 | 5.78  |
| 20000 | 0.95 | 0.1  | 0.9  | 190 | 3600 | 16200 | 0.41 | 0.0971 | 0.1029 | 0.8971 | 0.9029 | 188 | 3506 | 16306 | 212 | 3694 | 16094 | 3.25 | 5.34  |
| 20000 | 0.96 | 0.1  | 0.9  | 192 | 3600 | 16200 | 0.26 | 0.0971 | 0.1029 | 0.8971 | 0.9029 | 188 | 3506 | 16306 | 212 | 3694 | 16094 | 3.30 | 4.95  |
| 20000 | 0.97 | 0.1  | 0.9  | 194 | 3600 | 16200 | 0.15 | 0.0971 | 0.1029 | 0.8971 | 0.9029 | 188 | 3506 | 16306 | 212 | 3694 | 16094 | 3.40 | 4.59  |
| 20000 | 0.98 | 0.1  | 0.9  | 196 | 3600 | 16200 | 0.07 | 0.0971 | 0.1029 | 0.8971 | 0.9029 | 188 | 3506 | 16306 | 212 | 3694 | 16094 | 3.54 | 4.27  |
| 20000 | 0.99 | 0.1  | 0.9  | 198 | 3600 | 16200 | 0.02 | 0.0971 | 0.1029 | 0.8971 | 0.9029 | 188 | 3506 | 16306 | 212 | 3694 | 16094 | 3.72 | 3.99  |
| 20000 | 1.00 | 0.1  | 0.9  | 200 | 3600 | 16200 | 0.00 | 0.0971 | 0.1029 | 0.8971 | 0.9029 | 188 | 3506 | 16306 | 212 | 3694 | 16094 | 3.95 | 3.74  |
| 20000 | 1.01 | 0.1  | 0.9  | 202 | 3600 | 16200 | 0.02 | 0.0971 | 0.1029 | 0.8971 | 0.9029 | 188 | 3506 | 16306 | 212 | 3694 | 16094 | 4.21 | 3.54  |
| 20000 | 1.02 | 0.1  | 0.9  | 204 | 3600 | 16200 | 0.06 | 0.0971 | 0.1029 | 0.8971 | 0.9029 | 188 | 3506 | 16306 | 212 | 3694 | 16094 | 4.52 | 3.37  |
| 20000 | 1.03 | 0.1  | 0.9  | 206 | 3600 | 16200 | 0.14 | 0.0971 | 0.1029 | 0.8971 | 0.9029 | 188 | 3506 | 16306 | 212 | 3694 | 16094 | 4.87 | 3.24  |
| 20000 | 1.04 | 0.1  | 0.9  | 208 | 3600 | 16200 | 0.26 | 0.0971 | 0.1029 | 0.8971 | 0.9029 | 188 | 3506 | 16306 | 212 | 3694 | 16094 | 5.27 | 3.15  |
| 20000 | 1.05 | 0.1  | 0.9  | 210 | 3600 | 16200 | 0.40 | 0.0971 | 0.1029 | 0.8971 | 0.9029 | 188 | 3506 | 16306 | 212 | 3694 | 16094 | 5.71 | 3.09  |

|       |      |      |      |     |      |       |       |        |        |        |        |     |      |       |     |      |       |       |       |
|-------|------|------|------|-----|------|-------|-------|--------|--------|--------|--------|-----|------|-------|-----|------|-------|-------|-------|
| 20000 | 1.06 | 0.1  | 0.9  | 212 | 3600 | 16200 | 0.58  | 0.0971 | 0.1029 | 0.8971 | 0.9029 | 188 | 3506 | 16306 | 212 | 3694 | 16094 | 6.19  | 3.07  |
| 20000 | 1.07 | 0.1  | 0.9  | 214 | 3600 | 16200 | 0.78  | 0.0971 | 0.1029 | 0.8971 | 0.9029 | 188 | 3506 | 16306 | 212 | 3694 | 16094 | 6.71  | 3.09  |
| 20000 | 1.08 | 0.1  | 0.9  | 216 | 3600 | 16200 | 1.02  | 0.0971 | 0.1029 | 0.8971 | 0.9029 | 188 | 3506 | 16306 | 212 | 3694 | 16094 | 7.27  | 3.15  |
| 20000 | 1.09 | 0.1  | 0.9  | 218 | 3600 | 16200 | 1.29  | 0.0971 | 0.1029 | 0.8971 | 0.9029 | 188 | 3506 | 16306 | 212 | 3694 | 16094 | 7.88  | 3.25  |
| 20000 | 1.10 | 0.1  | 0.9  | 220 | 3600 | 16200 | 1.59  | 0.0971 | 0.1029 | 0.8971 | 0.9029 | 188 | 3506 | 16306 | 212 | 3694 | 16094 | 8.53  | 3.38  |
| 20000 | 1.11 | 0.1  | 0.9  | 222 | 3600 | 16200 | 1.92  | 0.0971 | 0.1029 | 0.8971 | 0.9029 | 188 | 3506 | 16306 | 212 | 3694 | 16094 | 9.22  | 3.55  |
| 20000 | 1.12 | 0.1  | 0.9  | 224 | 3600 | 16200 | 2.28  | 0.0971 | 0.1029 | 0.8971 | 0.9029 | 188 | 3506 | 16306 | 212 | 3694 | 16094 | 9.95  | 3.76  |
| 20000 | 1.13 | 0.1  | 0.9  | 226 | 3600 | 16200 | 2.67  | 0.0971 | 0.1029 | 0.8971 | 0.9029 | 188 | 3506 | 16306 | 212 | 3694 | 16094 | 10.73 | 4.01  |
| 20000 | 1.14 | 0.1  | 0.9  | 228 | 3600 | 16200 | 3.09  | 0.0971 | 0.1029 | 0.8971 | 0.9029 | 188 | 3506 | 16306 | 212 | 3694 | 16094 | 11.55 | 4.29  |
| 20000 | 1.15 | 0.1  | 0.9  | 230 | 3600 | 16200 | 3.54  | 0.0971 | 0.1029 | 0.8971 | 0.9029 | 188 | 3506 | 16306 | 212 | 3694 | 16094 | 12.41 | 4.61  |
| 20000 | 1.16 | 0.1  | 0.9  | 232 | 3600 | 16200 | 4.02  | 0.0971 | 0.1029 | 0.8971 | 0.9029 | 188 | 3506 | 16306 | 212 | 3694 | 16094 | 13.32 | 4.97  |
| 20000 | 1.17 | 0.1  | 0.9  | 234 | 3600 | 16200 | 4.53  | 0.0971 | 0.1029 | 0.8971 | 0.9029 | 188 | 3506 | 16306 | 212 | 3694 | 16094 | 14.26 | 5.37  |
| 20000 | 1.18 | 0.1  | 0.9  | 236 | 3600 | 16200 | 5.07  | 0.0971 | 0.1029 | 0.8971 | 0.9029 | 188 | 3506 | 16306 | 212 | 3694 | 16094 | 15.25 | 5.81  |
| 20000 | 1.19 | 0.1  | 0.9  | 238 | 3600 | 16200 | 5.64  | 0.0971 | 0.1029 | 0.8971 | 0.9029 | 188 | 3506 | 16306 | 212 | 3694 | 16094 | 16.28 | 6.28  |
| 20000 | 1.20 | 0.1  | 0.9  | 240 | 3600 | 16200 | 6.24  | 0.0971 | 0.1029 | 0.8971 | 0.9029 | 188 | 3506 | 16306 | 212 | 3694 | 16094 | 17.36 | 6.79  |
| 20000 | 0.80 | 0.15 | 0.85 | 360 | 5100 | 14450 | 13.76 | 0.1465 | 0.1535 | 0.8465 | 0.8535 | 429 | 5002 | 14569 | 471 | 5197 | 14331 | 14.09 | 29.07 |
| 20000 | 0.81 | 0.15 | 0.85 | 365 | 5100 | 14450 | 12.38 | 0.1465 | 0.1535 | 0.8465 | 0.8535 | 429 | 5002 | 14569 | 471 | 5197 | 14331 | 12.68 | 26.99 |
| 20000 | 0.82 | 0.15 | 0.85 | 369 | 5100 | 14450 | 11.08 | 0.1465 | 0.1535 | 0.8465 | 0.8535 | 429 | 5002 | 14569 | 471 | 5197 | 14331 | 11.37 | 24.99 |
| 20000 | 0.83 | 0.15 | 0.85 | 374 | 5100 | 14450 | 9.86  | 0.1465 | 0.1535 | 0.8465 | 0.8535 | 429 | 5002 | 14569 | 471 | 5197 | 14331 | 10.15 | 23.08 |
| 20000 | 0.84 | 0.15 | 0.85 | 378 | 5100 | 14450 | 8.71  | 0.1465 | 0.1535 | 0.8465 | 0.8535 | 429 | 5002 | 14569 | 471 | 5197 | 14331 | 9.03  | 21.26 |
| 20000 | 0.85 | 0.15 | 0.85 | 383 | 5100 | 14450 | 7.63  | 0.1465 | 0.1535 | 0.8465 | 0.8535 | 429 | 5002 | 14569 | 471 | 5197 | 14331 | 8.01  | 19.52 |
| 20000 | 0.86 | 0.15 | 0.85 | 387 | 5100 | 14450 | 6.63  | 0.1465 | 0.1535 | 0.8465 | 0.8535 | 429 | 5002 | 14569 | 471 | 5197 | 14331 | 7.07  | 17.87 |
| 20000 | 0.87 | 0.15 | 0.85 | 392 | 5100 | 14450 | 5.70  | 0.1465 | 0.1535 | 0.8465 | 0.8535 | 429 | 5002 | 14569 | 471 | 5197 | 14331 | 6.23  | 16.31 |
| 20000 | 0.88 | 0.15 | 0.85 | 396 | 5100 | 14450 | 4.84  | 0.1465 | 0.1535 | 0.8465 | 0.8535 | 429 | 5002 | 14569 | 471 | 5197 | 14331 | 5.49  | 14.83 |
| 20000 | 0.89 | 0.15 | 0.85 | 401 | 5100 | 14450 | 4.06  | 0.1465 | 0.1535 | 0.8465 | 0.8535 | 429 | 5002 | 14569 | 471 | 5197 | 14331 | 4.84  | 13.43 |
| 20000 | 0.90 | 0.15 | 0.85 | 405 | 5100 | 14450 | 3.34  | 0.1465 | 0.1535 | 0.8465 | 0.8535 | 429 | 5002 | 14569 | 471 | 5197 | 14331 | 4.28  | 12.12 |
| 20000 | 0.91 | 0.15 | 0.85 | 410 | 5100 | 14450 | 2.70  | 0.1465 | 0.1535 | 0.8465 | 0.8535 | 429 | 5002 | 14569 | 471 | 5197 | 14331 | 3.82  | 10.90 |
| 20000 | 0.92 | 0.15 | 0.85 | 414 | 5100 | 14450 | 2.13  | 0.1465 | 0.1535 | 0.8465 | 0.8535 | 429 | 5002 | 14569 | 471 | 5197 | 14331 | 3.46  | 9.77  |
| 20000 | 0.93 | 0.15 | 0.85 | 419 | 5100 | 14450 | 1.62  | 0.1465 | 0.1535 | 0.8465 | 0.8535 | 429 | 5002 | 14569 | 471 | 5197 | 14331 | 3.18  | 8.71  |
| 20000 | 0.94 | 0.15 | 0.85 | 423 | 5100 | 14450 | 1.19  | 0.1465 | 0.1535 | 0.8465 | 0.8535 | 429 | 5002 | 14569 | 471 | 5197 | 14331 | 3.01  | 7.75  |
| 20000 | 0.95 | 0.15 | 0.85 | 428 | 5100 | 14450 | 0.82  | 0.1465 | 0.1535 | 0.8465 | 0.8535 | 429 | 5002 | 14569 | 471 | 5197 | 14331 | 2.92  | 6.87  |
| 20000 | 0.96 | 0.15 | 0.85 | 432 | 5100 | 14450 | 0.53  | 0.1465 | 0.1535 | 0.8465 | 0.8535 | 429 | 5002 | 14569 | 471 | 5197 | 14331 | 2.93  | 6.08  |
| 20000 | 0.97 | 0.15 | 0.85 | 437 | 5100 | 14450 | 0.30  | 0.1465 | 0.1535 | 0.8465 | 0.8535 | 429 | 5002 | 14569 | 471 | 5197 | 14331 | 3.04  | 5.37  |
| 20000 | 0.98 | 0.15 | 0.85 | 441 | 5100 | 14450 | 0.13  | 0.1465 | 0.1535 | 0.8465 | 0.8535 | 429 | 5002 | 14569 | 471 | 5197 | 14331 | 3.24  | 4.75  |
| 20000 | 0.99 | 0.15 | 0.85 | 446 | 5100 | 14450 | 0.03  | 0.1465 | 0.1535 | 0.8465 | 0.8535 | 429 | 5002 | 14569 | 471 | 5197 | 14331 | 3.53  | 4.22  |

|       |      |      |      |     |      |       |       |        |        |        |        |     |      |       |     |      |       |       |       |
|-------|------|------|------|-----|------|-------|-------|--------|--------|--------|--------|-----|------|-------|-----|------|-------|-------|-------|
| 20000 | 1.00 | 0.15 | 0.85 | 450 | 5100 | 14450 | 0.00  | 0.1465 | 0.1535 | 0.8465 | 0.8535 | 429 | 5002 | 14569 | 471 | 5197 | 14331 | 3.92  | 3.77  |
| 20000 | 1.01 | 0.15 | 0.85 | 455 | 5100 | 14450 | 0.03  | 0.1465 | 0.1535 | 0.8465 | 0.8535 | 429 | 5002 | 14569 | 471 | 5197 | 14331 | 4.40  | 3.41  |
| 20000 | 1.02 | 0.15 | 0.85 | 459 | 5100 | 14450 | 0.13  | 0.1465 | 0.1535 | 0.8465 | 0.8535 | 429 | 5002 | 14569 | 471 | 5197 | 14331 | 4.98  | 3.13  |
| 20000 | 1.03 | 0.15 | 0.85 | 464 | 5100 | 14450 | 0.29  | 0.1465 | 0.1535 | 0.8465 | 0.8535 | 429 | 5002 | 14569 | 471 | 5197 | 14331 | 5.65  | 2.94  |
| 20000 | 1.04 | 0.15 | 0.85 | 468 | 5100 | 14450 | 0.51  | 0.1465 | 0.1535 | 0.8465 | 0.8535 | 429 | 5002 | 14569 | 471 | 5197 | 14331 | 6.41  | 2.83  |
| 20000 | 1.05 | 0.15 | 0.85 | 473 | 5100 | 14450 | 0.80  | 0.1465 | 0.1535 | 0.8465 | 0.8535 | 429 | 5002 | 14569 | 471 | 5197 | 14331 | 7.27  | 2.82  |
| 20000 | 1.06 | 0.15 | 0.85 | 477 | 5100 | 14450 | 1.15  | 0.1465 | 0.1535 | 0.8465 | 0.8535 | 429 | 5002 | 14569 | 471 | 5197 | 14331 | 8.23  | 2.88  |
| 20000 | 1.07 | 0.15 | 0.85 | 482 | 5100 | 14450 | 1.56  | 0.1465 | 0.1535 | 0.8465 | 0.8535 | 429 | 5002 | 14569 | 471 | 5197 | 14331 | 9.27  | 3.04  |
| 20000 | 1.08 | 0.15 | 0.85 | 486 | 5100 | 14450 | 2.04  | 0.1465 | 0.1535 | 0.8465 | 0.8535 | 429 | 5002 | 14569 | 471 | 5197 | 14331 | 10.42 | 3.27  |
| 20000 | 1.09 | 0.15 | 0.85 | 491 | 5100 | 14450 | 2.57  | 0.1465 | 0.1535 | 0.8465 | 0.8535 | 429 | 5002 | 14569 | 471 | 5197 | 14331 | 11.65 | 3.60  |
| 20000 | 1.10 | 0.15 | 0.85 | 495 | 5100 | 14450 | 3.16  | 0.1465 | 0.1535 | 0.8465 | 0.8535 | 429 | 5002 | 14569 | 471 | 5197 | 14331 | 12.99 | 4.01  |
| 20000 | 1.11 | 0.15 | 0.85 | 500 | 5100 | 14450 | 3.82  | 0.1465 | 0.1535 | 0.8465 | 0.8535 | 429 | 5002 | 14569 | 471 | 5197 | 14331 | 14.41 | 4.51  |
| 20000 | 1.12 | 0.15 | 0.85 | 504 | 5100 | 14450 | 4.53  | 0.1465 | 0.1535 | 0.8465 | 0.8535 | 429 | 5002 | 14569 | 471 | 5197 | 14331 | 15.93 | 5.09  |
| 20000 | 1.13 | 0.15 | 0.85 | 509 | 5100 | 14450 | 5.30  | 0.1465 | 0.1535 | 0.8465 | 0.8535 | 429 | 5002 | 14569 | 471 | 5197 | 14331 | 17.55 | 5.76  |
| 20000 | 1.14 | 0.15 | 0.85 | 513 | 5100 | 14450 | 6.13  | 0.1465 | 0.1535 | 0.8465 | 0.8535 | 429 | 5002 | 14569 | 471 | 5197 | 14331 | 19.25 | 6.51  |
| 20000 | 1.15 | 0.15 | 0.85 | 518 | 5100 | 14450 | 7.02  | 0.1465 | 0.1535 | 0.8465 | 0.8535 | 429 | 5002 | 14569 | 471 | 5197 | 14331 | 21.06 | 7.35  |
| 20000 | 1.16 | 0.15 | 0.85 | 522 | 5100 | 14450 | 7.97  | 0.1465 | 0.1535 | 0.8465 | 0.8535 | 429 | 5002 | 14569 | 471 | 5197 | 14331 | 22.96 | 8.28  |
| 20000 | 1.17 | 0.15 | 0.85 | 527 | 5100 | 14450 | 8.97  | 0.1465 | 0.1535 | 0.8465 | 0.8535 | 429 | 5002 | 14569 | 471 | 5197 | 14331 | 24.95 | 9.29  |
| 20000 | 1.18 | 0.15 | 0.85 | 531 | 5100 | 14450 | 10.03 | 0.1465 | 0.1535 | 0.8465 | 0.8535 | 429 | 5002 | 14569 | 471 | 5197 | 14331 | 27.03 | 10.39 |
| 20000 | 1.19 | 0.15 | 0.85 | 536 | 5100 | 14450 | 11.14 | 0.1465 | 0.1535 | 0.8465 | 0.8535 | 429 | 5002 | 14569 | 471 | 5197 | 14331 | 29.21 | 11.57 |
| 20000 | 1.20 | 0.15 | 0.85 | 540 | 5100 | 14450 | 12.31 | 0.1465 | 0.1535 | 0.8465 | 0.8535 | 429 | 5002 | 14569 | 471 | 5197 | 14331 | 31.49 | 12.85 |
| 20000 | 0.80 | 0.2  | 0.8  | 640 | 6400 | 12800 | 22.04 | 0.1961 | 0.2039 | 0.7961 | 0.8039 | 769 | 6305 | 12926 | 832 | 6493 | 12675 | 24.27 | 46.75 |
| 20000 | 0.81 | 0.2  | 0.8  | 648 | 6400 | 12800 | 19.82 | 0.1961 | 0.2039 | 0.7961 | 0.8039 | 769 | 6305 | 12926 | 832 | 6493 | 12675 | 21.67 | 43.14 |
| 20000 | 0.82 | 0.2  | 0.8  | 656 | 6400 | 12800 | 17.72 | 0.1961 | 0.2039 | 0.7961 | 0.8039 | 769 | 6305 | 12926 | 832 | 6493 | 12675 | 19.24 | 39.69 |
| 20000 | 0.83 | 0.2  | 0.8  | 664 | 6400 | 12800 | 15.75 | 0.1961 | 0.2039 | 0.7961 | 0.8039 | 769 | 6305 | 12926 | 832 | 6493 | 12675 | 16.97 | 36.38 |
| 20000 | 0.84 | 0.2  | 0.8  | 672 | 6400 | 12800 | 13.90 | 0.1961 | 0.2039 | 0.7961 | 0.8039 | 769 | 6305 | 12926 | 832 | 6493 | 12675 | 14.87 | 33.23 |
| 20000 | 0.85 | 0.2  | 0.8  | 680 | 6400 | 12800 | 12.17 | 0.1961 | 0.2039 | 0.7961 | 0.8039 | 769 | 6305 | 12926 | 832 | 6493 | 12675 | 12.93 | 30.24 |
| 20000 | 0.86 | 0.2  | 0.8  | 688 | 6400 | 12800 | 10.56 | 0.1961 | 0.2039 | 0.7961 | 0.8039 | 769 | 6305 | 12926 | 832 | 6493 | 12675 | 11.17 | 27.40 |
| 20000 | 0.87 | 0.2  | 0.8  | 696 | 6400 | 12800 | 9.07  | 0.1961 | 0.2039 | 0.7961 | 0.8039 | 769 | 6305 | 12926 | 832 | 6493 | 12675 | 9.57  | 24.71 |
| 20000 | 0.88 | 0.2  | 0.8  | 704 | 6400 | 12800 | 7.70  | 0.1961 | 0.2039 | 0.7961 | 0.8039 | 769 | 6305 | 12926 | 832 | 6493 | 12675 | 8.13  | 22.18 |
| 20000 | 0.89 | 0.2  | 0.8  | 712 | 6400 | 12800 | 6.45  | 0.1961 | 0.2039 | 0.7961 | 0.8039 | 769 | 6305 | 12926 | 832 | 6493 | 12675 | 6.86  | 19.80 |
| 20000 | 0.90 | 0.2  | 0.8  | 720 | 6400 | 12800 | 5.31  | 0.1961 | 0.2039 | 0.7961 | 0.8039 | 769 | 6305 | 12926 | 832 | 6493 | 12675 | 5.76  | 17.57 |
| 20000 | 0.91 | 0.2  | 0.8  | 728 | 6400 | 12800 | 4.29  | 0.1961 | 0.2039 | 0.7961 | 0.8039 | 769 | 6305 | 12926 | 832 | 6493 | 12675 | 4.83  | 15.50 |
| 20000 | 0.92 | 0.2  | 0.8  | 736 | 6400 | 12800 | 3.37  | 0.1961 | 0.2039 | 0.7961 | 0.8039 | 769 | 6305 | 12926 | 832 | 6493 | 12675 | 4.06  | 13.59 |
| 20000 | 0.93 | 0.2  | 0.8  | 744 | 6400 | 12800 | 2.57  | 0.1961 | 0.2039 | 0.7961 | 0.8039 | 769 | 6305 | 12926 | 832 | 6493 | 12675 | 3.45  | 11.82 |

|       |      |      |      |      |      |       |       |        |        |        |        |      |      |       |      |      |       |       |       |
|-------|------|------|------|------|------|-------|-------|--------|--------|--------|--------|------|------|-------|------|------|-------|-------|-------|
| 20000 | 0.94 | 0.2  | 0.8  | 752  | 6400 | 12800 | 1.88  | 0.1961 | 0.2039 | 0.7961 | 0.8039 | 769  | 6305 | 12926 | 832  | 6493 | 12675 | 3.02  | 10.21 |
| 20000 | 0.95 | 0.2  | 0.8  | 760  | 6400 | 12800 | 1.30  | 0.1961 | 0.2039 | 0.7961 | 0.8039 | 769  | 6305 | 12926 | 832  | 6493 | 12675 | 2.75  | 8.76  |
| 20000 | 0.96 | 0.2  | 0.8  | 768  | 6400 | 12800 | 0.83  | 0.1961 | 0.2039 | 0.7961 | 0.8039 | 769  | 6305 | 12926 | 832  | 6493 | 12675 | 2.65  | 7.45  |
| 20000 | 0.97 | 0.2  | 0.8  | 776  | 6400 | 12800 | 0.47  | 0.1961 | 0.2039 | 0.7961 | 0.8039 | 769  | 6305 | 12926 | 832  | 6493 | 12675 | 2.71  | 6.31  |
| 20000 | 0.98 | 0.2  | 0.8  | 784  | 6400 | 12800 | 0.21  | 0.1961 | 0.2039 | 0.7961 | 0.8039 | 769  | 6305 | 12926 | 832  | 6493 | 12675 | 2.94  | 5.31  |
| 20000 | 0.99 | 0.2  | 0.8  | 792  | 6400 | 12800 | 0.05  | 0.1961 | 0.2039 | 0.7961 | 0.8039 | 769  | 6305 | 12926 | 832  | 6493 | 12675 | 3.34  | 4.47  |
| 20000 | 1.00 | 0.2  | 0.8  | 800  | 6400 | 12800 | 0.00  | 0.1961 | 0.2039 | 0.7961 | 0.8039 | 769  | 6305 | 12926 | 832  | 6493 | 12675 | 3.90  | 3.79  |
| 20000 | 1.01 | 0.2  | 0.8  | 808  | 6400 | 12800 | 0.05  | 0.1961 | 0.2039 | 0.7961 | 0.8039 | 769  | 6305 | 12926 | 832  | 6493 | 12675 | 4.63  | 3.25  |
| 20000 | 1.02 | 0.2  | 0.8  | 816  | 6400 | 12800 | 0.20  | 0.1961 | 0.2039 | 0.7961 | 0.8039 | 769  | 6305 | 12926 | 832  | 6493 | 12675 | 5.52  | 2.88  |
| 20000 | 1.03 | 0.2  | 0.8  | 824  | 6400 | 12800 | 0.46  | 0.1961 | 0.2039 | 0.7961 | 0.8039 | 769  | 6305 | 12926 | 832  | 6493 | 12675 | 6.59  | 2.65  |
| 20000 | 1.04 | 0.2  | 0.8  | 832  | 6400 | 12800 | 0.81  | 0.1961 | 0.2039 | 0.7961 | 0.8039 | 769  | 6305 | 12926 | 832  | 6493 | 12675 | 7.82  | 2.58  |
| 20000 | 1.05 | 0.2  | 0.8  | 840  | 6400 | 12800 | 1.26  | 0.1961 | 0.2039 | 0.7961 | 0.8039 | 769  | 6305 | 12926 | 832  | 6493 | 12675 | 9.21  | 2.66  |
| 20000 | 1.06 | 0.2  | 0.8  | 848  | 6400 | 12800 | 1.80  | 0.1961 | 0.2039 | 0.7961 | 0.8039 | 769  | 6305 | 12926 | 832  | 6493 | 12675 | 10.77 | 2.90  |
| 20000 | 1.07 | 0.2  | 0.8  | 856  | 6400 | 12800 | 2.45  | 0.1961 | 0.2039 | 0.7961 | 0.8039 | 769  | 6305 | 12926 | 832  | 6493 | 12675 | 12.50 | 3.29  |
| 20000 | 1.08 | 0.2  | 0.8  | 864  | 6400 | 12800 | 3.18  | 0.1961 | 0.2039 | 0.7961 | 0.8039 | 769  | 6305 | 12926 | 832  | 6493 | 12675 | 14.40 | 3.84  |
| 20000 | 1.09 | 0.2  | 0.8  | 872  | 6400 | 12800 | 4.02  | 0.1961 | 0.2039 | 0.7961 | 0.8039 | 769  | 6305 | 12926 | 832  | 6493 | 12675 | 16.46 | 4.54  |
| 20000 | 1.10 | 0.2  | 0.8  | 880  | 6400 | 12800 | 4.94  | 0.1961 | 0.2039 | 0.7961 | 0.8039 | 769  | 6305 | 12926 | 832  | 6493 | 12675 | 18.68 | 5.39  |
| 20000 | 1.11 | 0.2  | 0.8  | 888  | 6400 | 12800 | 5.96  | 0.1961 | 0.2039 | 0.7961 | 0.8039 | 769  | 6305 | 12926 | 832  | 6493 | 12675 | 21.08 | 6.40  |
| 20000 | 1.12 | 0.2  | 0.8  | 896  | 6400 | 12800 | 7.07  | 0.1961 | 0.2039 | 0.7961 | 0.8039 | 769  | 6305 | 12926 | 832  | 6493 | 12675 | 23.64 | 7.56  |
| 20000 | 1.13 | 0.2  | 0.8  | 904  | 6400 | 12800 | 8.26  | 0.1961 | 0.2039 | 0.7961 | 0.8039 | 769  | 6305 | 12926 | 832  | 6493 | 12675 | 26.37 | 8.87  |
| 20000 | 1.14 | 0.2  | 0.8  | 912  | 6400 | 12800 | 9.55  | 0.1961 | 0.2039 | 0.7961 | 0.8039 | 769  | 6305 | 12926 | 832  | 6493 | 12675 | 29.26 | 10.34 |
| 20000 | 1.15 | 0.2  | 0.8  | 920  | 6400 | 12800 | 10.92 | 0.1961 | 0.2039 | 0.7961 | 0.8039 | 769  | 6305 | 12926 | 832  | 6493 | 12675 | 32.32 | 11.96 |
| 20000 | 1.16 | 0.2  | 0.8  | 928  | 6400 | 12800 | 12.39 | 0.1961 | 0.2039 | 0.7961 | 0.8039 | 769  | 6305 | 12926 | 832  | 6493 | 12675 | 35.54 | 13.74 |
| 20000 | 1.17 | 0.2  | 0.8  | 936  | 6400 | 12800 | 13.93 | 0.1961 | 0.2039 | 0.7961 | 0.8039 | 769  | 6305 | 12926 | 832  | 6493 | 12675 | 38.94 | 15.67 |
| 20000 | 1.18 | 0.2  | 0.8  | 944  | 6400 | 12800 | 15.57 | 0.1961 | 0.2039 | 0.7961 | 0.8039 | 769  | 6305 | 12926 | 832  | 6493 | 12675 | 42.50 | 17.75 |
| 20000 | 1.19 | 0.2  | 0.8  | 952  | 6400 | 12800 | 17.29 | 0.1961 | 0.2039 | 0.7961 | 0.8039 | 769  | 6305 | 12926 | 832  | 6493 | 12675 | 46.22 | 19.99 |
| 20000 | 1.20 | 0.2  | 0.8  | 960  | 6400 | 12800 | 19.09 | 0.1961 | 0.2039 | 0.7961 | 0.8039 | 769  | 6305 | 12926 | 832  | 6493 | 12675 | 50.11 | 22.38 |
| 20000 | 0.80 | 0.25 | 0.75 | 1000 | 7500 | 11250 | 30.77 | 0.2458 | 0.2542 | 0.7458 | 0.7542 | 1208 | 7414 | 11378 | 1293 | 7584 | 11123 | 38.21 | 68.70 |
| 20000 | 0.81 | 0.25 | 0.75 | 1013 | 7500 | 11250 | 27.65 | 0.2458 | 0.2542 | 0.7458 | 0.7542 | 1208 | 7414 | 11378 | 1293 | 7584 | 11123 | 34.04 | 63.15 |
| 20000 | 0.82 | 0.25 | 0.75 | 1025 | 7500 | 11250 | 24.70 | 0.2458 | 0.2542 | 0.7458 | 0.7542 | 1208 | 7414 | 11378 | 1293 | 7584 | 11123 | 30.12 | 57.85 |
| 20000 | 0.83 | 0.25 | 0.75 | 1038 | 7500 | 11250 | 21.93 | 0.2458 | 0.2542 | 0.7458 | 0.7542 | 1208 | 7414 | 11378 | 1293 | 7584 | 11123 | 26.47 | 52.80 |
| 20000 | 0.84 | 0.25 | 0.75 | 1050 | 7500 | 11250 | 19.34 | 0.2458 | 0.2542 | 0.7458 | 0.7542 | 1208 | 7414 | 11378 | 1293 | 7584 | 11123 | 23.07 | 47.98 |
| 20000 | 0.85 | 0.25 | 0.75 | 1063 | 7500 | 11250 | 16.92 | 0.2458 | 0.2542 | 0.7458 | 0.7542 | 1208 | 7414 | 11378 | 1293 | 7584 | 11123 | 19.93 | 43.41 |
| 20000 | 0.86 | 0.25 | 0.75 | 1075 | 7500 | 11250 | 14.67 | 0.2458 | 0.2542 | 0.7458 | 0.7542 | 1208 | 7414 | 11378 | 1293 | 7584 | 11123 | 17.05 | 39.07 |
| 20000 | 0.87 | 0.25 | 0.75 | 1088 | 7500 | 11250 | 12.59 | 0.2458 | 0.2542 | 0.7458 | 0.7542 | 1208 | 7414 | 11378 | 1293 | 7584 | 11123 | 14.43 | 34.98 |

|       |      |      |      |      |      |       |       |        |        |        |        |      |      |       |      |      |       |       |       |
|-------|------|------|------|------|------|-------|-------|--------|--------|--------|--------|------|------|-------|------|------|-------|-------|-------|
| 20000 | 0.88 | 0.25 | 0.75 | 1100 | 7500 | 11250 | 10.68 | 0.2458 | 0.2542 | 0.7458 | 0.7542 | 1208 | 7414 | 11378 | 1293 | 7584 | 11123 | 12.06 | 31.13 |
| 20000 | 0.89 | 0.25 | 0.75 | 1113 | 7500 | 11250 | 8.93  | 0.2458 | 0.2542 | 0.7458 | 0.7542 | 1208 | 7414 | 11378 | 1293 | 7584 | 11123 | 9.96  | 27.53 |
| 20000 | 0.90 | 0.25 | 0.75 | 1125 | 7500 | 11250 | 7.35  | 0.2458 | 0.2542 | 0.7458 | 0.7542 | 1208 | 7414 | 11378 | 1293 | 7584 | 11123 | 8.11  | 24.16 |
| 20000 | 0.91 | 0.25 | 0.75 | 1138 | 7500 | 11250 | 5.93  | 0.2458 | 0.2542 | 0.7458 | 0.7542 | 1208 | 7414 | 11378 | 1293 | 7584 | 11123 | 6.53  | 21.04 |
| 20000 | 0.92 | 0.25 | 0.75 | 1150 | 7500 | 11250 | 4.66  | 0.2458 | 0.2542 | 0.7458 | 0.7542 | 1208 | 7414 | 11378 | 1293 | 7584 | 11123 | 5.20  | 18.15 |
| 20000 | 0.93 | 0.25 | 0.75 | 1163 | 7500 | 11250 | 3.55  | 0.2458 | 0.2542 | 0.7458 | 0.7542 | 1208 | 7414 | 11378 | 1293 | 7584 | 11123 | 4.13  | 15.51 |
| 20000 | 0.94 | 0.25 | 0.75 | 1175 | 7500 | 11250 | 2.60  | 0.2458 | 0.2542 | 0.7458 | 0.7542 | 1208 | 7414 | 11378 | 1293 | 7584 | 11123 | 3.32  | 13.12 |
| 20000 | 0.95 | 0.25 | 0.75 | 1188 | 7500 | 11250 | 1.80  | 0.2458 | 0.2542 | 0.7458 | 0.7542 | 1208 | 7414 | 11378 | 1293 | 7584 | 11123 | 2.77  | 10.96 |
| 20000 | 0.96 | 0.25 | 0.75 | 1200 | 7500 | 11250 | 1.14  | 0.2458 | 0.2542 | 0.7458 | 0.7542 | 1208 | 7414 | 11378 | 1293 | 7584 | 11123 | 2.47  | 9.04  |
| 20000 | 0.97 | 0.25 | 0.75 | 1213 | 7500 | 11250 | 0.64  | 0.2458 | 0.2542 | 0.7458 | 0.7542 | 1208 | 7414 | 11378 | 1293 | 7584 | 11123 | 2.44  | 7.37  |
| 20000 | 0.98 | 0.25 | 0.75 | 1225 | 7500 | 11250 | 0.28  | 0.2458 | 0.2542 | 0.7458 | 0.7542 | 1208 | 7414 | 11378 | 1293 | 7584 | 11123 | 2.66  | 5.94  |
| 20000 | 0.99 | 0.25 | 0.75 | 1238 | 7500 | 11250 | 0.07  | 0.2458 | 0.2542 | 0.7458 | 0.7542 | 1208 | 7414 | 11378 | 1293 | 7584 | 11123 | 3.14  | 4.75  |
| 20000 | 1.00 | 0.25 | 0.75 | 1250 | 7500 | 11250 | 0.00  | 0.2458 | 0.2542 | 0.7458 | 0.7542 | 1208 | 7414 | 11378 | 1293 | 7584 | 11123 | 3.89  | 3.80  |
| 20000 | 1.01 | 0.25 | 0.75 | 1263 | 7500 | 11250 | 0.07  | 0.2458 | 0.2542 | 0.7458 | 0.7542 | 1208 | 7414 | 11378 | 1293 | 7584 | 11123 | 4.89  | 3.09  |
| 20000 | 1.02 | 0.25 | 0.75 | 1275 | 7500 | 11250 | 0.28  | 0.2458 | 0.2542 | 0.7458 | 0.7542 | 1208 | 7414 | 11378 | 1293 | 7584 | 11123 | 6.15  | 2.63  |
| 20000 | 1.03 | 0.25 | 0.75 | 1288 | 7500 | 11250 | 0.62  | 0.2458 | 0.2542 | 0.7458 | 0.7542 | 1208 | 7414 | 11378 | 1293 | 7584 | 11123 | 7.66  | 2.40  |
| 20000 | 1.04 | 0.25 | 0.75 | 1300 | 7500 | 11250 | 1.11  | 0.2458 | 0.2542 | 0.7458 | 0.7542 | 1208 | 7414 | 11378 | 1293 | 7584 | 11123 | 9.44  | 2.42  |
| 20000 | 1.05 | 0.25 | 0.75 | 1313 | 7500 | 11250 | 1.72  | 0.2458 | 0.2542 | 0.7458 | 0.7542 | 1208 | 7414 | 11378 | 1293 | 7584 | 11123 | 11.47 | 2.68  |
| 20000 | 1.06 | 0.25 | 0.75 | 1325 | 7500 | 11250 | 2.47  | 0.2458 | 0.2542 | 0.7458 | 0.7542 | 1208 | 7414 | 11378 | 1293 | 7584 | 11123 | 13.77 | 3.18  |
| 20000 | 1.07 | 0.25 | 0.75 | 1338 | 7500 | 11250 | 3.34  | 0.2458 | 0.2542 | 0.7458 | 0.7542 | 1208 | 7414 | 11378 | 1293 | 7584 | 11123 | 16.32 | 3.93  |
| 20000 | 1.08 | 0.25 | 0.75 | 1350 | 7500 | 11250 | 4.35  | 0.2458 | 0.2542 | 0.7458 | 0.7542 | 1208 | 7414 | 11378 | 1293 | 7584 | 11123 | 19.13 | 4.91  |
| 20000 | 1.09 | 0.25 | 0.75 | 1363 | 7500 | 11250 | 5.48  | 0.2458 | 0.2542 | 0.7458 | 0.7542 | 1208 | 7414 | 11378 | 1293 | 7584 | 11123 | 22.20 | 6.14  |
| 20000 | 1.10 | 0.25 | 0.75 | 1375 | 7500 | 11250 | 6.73  | 0.2458 | 0.2542 | 0.7458 | 0.7542 | 1208 | 7414 | 11378 | 1293 | 7584 | 11123 | 25.53 | 7.61  |
| 20000 | 1.11 | 0.25 | 0.75 | 1388 | 7500 | 11250 | 8.11  | 0.2458 | 0.2542 | 0.7458 | 0.7542 | 1208 | 7414 | 11378 | 1293 | 7584 | 11123 | 29.12 | 9.32  |
| 20000 | 1.12 | 0.25 | 0.75 | 1400 | 7500 | 11250 | 9.62  | 0.2458 | 0.2542 | 0.7458 | 0.7542 | 1208 | 7414 | 11378 | 1293 | 7584 | 11123 | 32.96 | 11.27 |
| 20000 | 1.13 | 0.25 | 0.75 | 1413 | 7500 | 11250 | 11.24 | 0.2458 | 0.2542 | 0.7458 | 0.7542 | 1208 | 7414 | 11378 | 1293 | 7584 | 11123 | 37.07 | 13.47 |
| 20000 | 1.14 | 0.25 | 0.75 | 1425 | 7500 | 11250 | 12.98 | 0.2458 | 0.2542 | 0.7458 | 0.7542 | 1208 | 7414 | 11378 | 1293 | 7584 | 11123 | 41.43 | 15.90 |
| 20000 | 1.15 | 0.25 | 0.75 | 1438 | 7500 | 11250 | 14.84 | 0.2458 | 0.2542 | 0.7458 | 0.7542 | 1208 | 7414 | 11378 | 1293 | 7584 | 11123 | 46.05 | 18.58 |
| 20000 | 1.16 | 0.25 | 0.75 | 1450 | 7500 | 11250 | 16.81 | 0.2458 | 0.2542 | 0.7458 | 0.7542 | 1208 | 7414 | 11378 | 1293 | 7584 | 11123 | 50.93 | 21.50 |
| 20000 | 1.17 | 0.25 | 0.75 | 1463 | 7500 | 11250 | 18.90 | 0.2458 | 0.2542 | 0.7458 | 0.7542 | 1208 | 7414 | 11378 | 1293 | 7584 | 11123 | 56.07 | 24.66 |
| 20000 | 1.18 | 0.25 | 0.75 | 1475 | 7500 | 11250 | 21.10 | 0.2458 | 0.2542 | 0.7458 | 0.7542 | 1208 | 7414 | 11378 | 1293 | 7584 | 11123 | 61.47 | 28.06 |
| 20000 | 1.19 | 0.25 | 0.75 | 1488 | 7500 | 11250 | 23.41 | 0.2458 | 0.2542 | 0.7458 | 0.7542 | 1208 | 7414 | 11378 | 1293 | 7584 | 11123 | 67.13 | 31.71 |
| 20000 | 1.20 | 0.25 | 0.75 | 1500 | 7500 | 11250 | 25.83 | 0.2458 | 0.2542 | 0.7458 | 0.7542 | 1208 | 7414 | 11378 | 1293 | 7584 | 11123 | 73.04 | 35.59 |
| 20000 | 0.80 | 0.3  | 0.7  | 1440 | 8400 | 9800  | 39.21 | 0.2955 | 0.3045 | 0.6955 | 0.7045 | 1747 | 8327 | 9926  | 1854 | 8471 | 9675  | 56.03 | 94.78 |
| 20000 | 0.81 | 0.3  | 0.7  | 1458 | 8400 | 9800  | 35.19 | 0.2955 | 0.3045 | 0.6955 | 0.7045 | 1747 | 8327 | 9926  | 1854 | 8471 | 9675  | 49.90 | 86.91 |

|       |      |     |     |      |      |      |       |        |        |        |        |      |      |      |      |      |      |       |       |
|-------|------|-----|-----|------|------|------|-------|--------|--------|--------|--------|------|------|------|------|------|------|-------|-------|
| 20000 | 0.82 | 0.3 | 0.7 | 1476 | 8400 | 9800 | 31.42 | 0.2955 | 0.3045 | 0.6955 | 0.7045 | 1747 | 8327 | 9926 | 1854 | 8471 | 9675 | 44.14 | 79.40 |
| 20000 | 0.83 | 0.3 | 0.7 | 1494 | 8400 | 9800 | 27.87 | 0.2955 | 0.3045 | 0.6955 | 0.7045 | 1747 | 8327 | 9926 | 1854 | 8471 | 9675 | 38.75 | 72.23 |
| 20000 | 0.84 | 0.3 | 0.7 | 1512 | 8400 | 9800 | 24.55 | 0.2955 | 0.3045 | 0.6955 | 0.7045 | 1747 | 8327 | 9926 | 1854 | 8471 | 9675 | 33.73 | 65.41 |
| 20000 | 0.85 | 0.3 | 0.7 | 1530 | 8400 | 9800 | 21.47 | 0.2955 | 0.3045 | 0.6955 | 0.7045 | 1747 | 8327 | 9926 | 1854 | 8471 | 9675 | 29.08 | 58.94 |
| 20000 | 0.86 | 0.3 | 0.7 | 1548 | 8400 | 9800 | 18.60 | 0.2955 | 0.3045 | 0.6955 | 0.7045 | 1747 | 8327 | 9926 | 1854 | 8471 | 9675 | 24.80 | 52.81 |
| 20000 | 0.87 | 0.3 | 0.7 | 1566 | 8400 | 9800 | 15.95 | 0.2955 | 0.3045 | 0.6955 | 0.7045 | 1747 | 8327 | 9926 | 1854 | 8471 | 9675 | 20.89 | 47.04 |
| 20000 | 0.88 | 0.3 | 0.7 | 1584 | 8400 | 9800 | 13.52 | 0.2955 | 0.3045 | 0.6955 | 0.7045 | 1747 | 8327 | 9926 | 1854 | 8471 | 9675 | 17.36 | 41.62 |
| 20000 | 0.89 | 0.3 | 0.7 | 1602 | 8400 | 9800 | 11.30 | 0.2955 | 0.3045 | 0.6955 | 0.7045 | 1747 | 8327 | 9926 | 1854 | 8471 | 9675 | 14.19 | 36.55 |
| 20000 | 0.90 | 0.3 | 0.7 | 1620 | 8400 | 9800 | 9.29  | 0.2955 | 0.3045 | 0.6955 | 0.7045 | 1747 | 8327 | 9926 | 1854 | 8471 | 9675 | 11.40 | 31.82 |
| 20000 | 0.91 | 0.3 | 0.7 | 1638 | 8400 | 9800 | 7.49  | 0.2955 | 0.3045 | 0.6955 | 0.7045 | 1747 | 8327 | 9926 | 1854 | 8471 | 9675 | 8.98  | 27.45 |
| 20000 | 0.92 | 0.3 | 0.7 | 1656 | 8400 | 9800 | 5.88  | 0.2955 | 0.3045 | 0.6955 | 0.7045 | 1747 | 8327 | 9926 | 1854 | 8471 | 9675 | 6.93  | 23.43 |
| 20000 | 0.93 | 0.3 | 0.7 | 1674 | 8400 | 9800 | 4.48  | 0.2955 | 0.3045 | 0.6955 | 0.7045 | 1747 | 8327 | 9926 | 1854 | 8471 | 9675 | 5.25  | 19.75 |
| 20000 | 0.94 | 0.3 | 0.7 | 1692 | 8400 | 9800 | 3.27  | 0.2955 | 0.3045 | 0.6955 | 0.7045 | 1747 | 8327 | 9926 | 1854 | 8471 | 9675 | 3.94  | 16.42 |
| 20000 | 0.95 | 0.3 | 0.7 | 1710 | 8400 | 9800 | 2.26  | 0.2955 | 0.3045 | 0.6955 | 0.7045 | 1747 | 8327 | 9926 | 1854 | 8471 | 9675 | 3.00  | 13.45 |
| 20000 | 0.96 | 0.3 | 0.7 | 1728 | 8400 | 9800 | 1.44  | 0.2955 | 0.3045 | 0.6955 | 0.7045 | 1747 | 8327 | 9926 | 1854 | 8471 | 9675 | 2.43  | 10.82 |
| 20000 | 0.97 | 0.3 | 0.7 | 1746 | 8400 | 9800 | 0.81  | 0.2955 | 0.3045 | 0.6955 | 0.7045 | 1747 | 8327 | 9926 | 1854 | 8471 | 9675 | 2.24  | 8.54  |
| 20000 | 0.98 | 0.3 | 0.7 | 1764 | 8400 | 9800 | 0.36  | 0.2955 | 0.3045 | 0.6955 | 0.7045 | 1747 | 8327 | 9926 | 1854 | 8471 | 9675 | 2.41  | 6.62  |
| 20000 | 0.99 | 0.3 | 0.7 | 1782 | 8400 | 9800 | 0.09  | 0.2955 | 0.3045 | 0.6955 | 0.7045 | 1747 | 8327 | 9926 | 1854 | 8471 | 9675 | 2.96  | 5.04  |
| 20000 | 1.00 | 0.3 | 0.7 | 1800 | 8400 | 9800 | 0.00  | 0.2955 | 0.3045 | 0.6955 | 0.7045 | 1747 | 8327 | 9926 | 1854 | 8471 | 9675 | 3.88  | 3.81  |
| 20000 | 1.01 | 0.3 | 0.7 | 1818 | 8400 | 9800 | 0.09  | 0.2955 | 0.3045 | 0.6955 | 0.7045 | 1747 | 8327 | 9926 | 1854 | 8471 | 9675 | 5.16  | 2.93  |
| 20000 | 1.02 | 0.3 | 0.7 | 1836 | 8400 | 9800 | 0.35  | 0.2955 | 0.3045 | 0.6955 | 0.7045 | 1747 | 8327 | 9926 | 1854 | 8471 | 9675 | 6.82  | 2.40  |
| 20000 | 1.03 | 0.3 | 0.7 | 1854 | 8400 | 9800 | 0.78  | 0.2955 | 0.3045 | 0.6955 | 0.7045 | 1747 | 8327 | 9926 | 1854 | 8471 | 9675 | 8.85  | 2.22  |
| 20000 | 1.04 | 0.3 | 0.7 | 1872 | 8400 | 9800 | 1.38  | 0.2955 | 0.3045 | 0.6955 | 0.7045 | 1747 | 8327 | 9926 | 1854 | 8471 | 9675 | 11.25 | 2.39  |
| 20000 | 1.05 | 0.3 | 0.7 | 1890 | 8400 | 9800 | 2.15  | 0.2955 | 0.3045 | 0.6955 | 0.7045 | 1747 | 8327 | 9926 | 1854 | 8471 | 9675 | 14.03 | 2.91  |
| 20000 | 1.06 | 0.3 | 0.7 | 1908 | 8400 | 9800 | 3.08  | 0.2955 | 0.3045 | 0.6955 | 0.7045 | 1747 | 8327 | 9926 | 1854 | 8471 | 9675 | 17.17 | 3.78  |
| 20000 | 1.07 | 0.3 | 0.7 | 1926 | 8400 | 9800 | 4.17  | 0.2955 | 0.3045 | 0.6955 | 0.7045 | 1747 | 8327 | 9926 | 1854 | 8471 | 9675 | 20.68 | 4.99  |
| 20000 | 1.08 | 0.3 | 0.7 | 1944 | 8400 | 9800 | 5.42  | 0.2955 | 0.3045 | 0.6955 | 0.7045 | 1747 | 8327 | 9926 | 1854 | 8471 | 9675 | 24.57 | 6.56  |
| 20000 | 1.09 | 0.3 | 0.7 | 1962 | 8400 | 9800 | 6.83  | 0.2955 | 0.3045 | 0.6955 | 0.7045 | 1747 | 8327 | 9926 | 1854 | 8471 | 9675 | 28.82 | 8.48  |
| 20000 | 1.10 | 0.3 | 0.7 | 1980 | 8400 | 9800 | 8.39  | 0.2955 | 0.3045 | 0.6955 | 0.7045 | 1747 | 8327 | 9926 | 1854 | 8471 | 9675 | 33.45 | 10.74 |
| 20000 | 1.11 | 0.3 | 0.7 | 1998 | 8400 | 9800 | 10.10 | 0.2955 | 0.3045 | 0.6955 | 0.7045 | 1747 | 8327 | 9926 | 1854 | 8471 | 9675 | 38.45 | 13.36 |
| 20000 | 1.12 | 0.3 | 0.7 | 2016 | 8400 | 9800 | 11.96 | 0.2955 | 0.3045 | 0.6955 | 0.7045 | 1747 | 8327 | 9926 | 1854 | 8471 | 9675 | 43.82 | 16.32 |
| 20000 | 1.13 | 0.3 | 0.7 | 2034 | 8400 | 9800 | 13.97 | 0.2955 | 0.3045 | 0.6955 | 0.7045 | 1747 | 8327 | 9926 | 1854 | 8471 | 9675 | 49.56 | 19.64 |
| 20000 | 1.14 | 0.3 | 0.7 | 2052 | 8400 | 9800 | 16.12 | 0.2955 | 0.3045 | 0.6955 | 0.7045 | 1747 | 8327 | 9926 | 1854 | 8471 | 9675 | 55.67 | 23.30 |
| 20000 | 1.15 | 0.3 | 0.7 | 2070 | 8400 | 9800 | 18.42 | 0.2955 | 0.3045 | 0.6955 | 0.7045 | 1747 | 8327 | 9926 | 1854 | 8471 | 9675 | 62.15 | 27.31 |
| 20000 | 1.16 | 0.3 | 0.7 | 2088 | 8400 | 9800 | 20.85 | 0.2955 | 0.3045 | 0.6955 | 0.7045 | 1747 | 8327 | 9926 | 1854 | 8471 | 9675 | 69.01 | 31.67 |

|       |      |      |      |      |      |      |       |        |        |        |        |      |      |      |      |      |      |        |        |
|-------|------|------|------|------|------|------|-------|--------|--------|--------|--------|------|------|------|------|------|------|--------|--------|
| 20000 | 1.17 | 0.3  | 0.7  | 2106 | 8400 | 9800 | 23.43 | 0.2955 | 0.3045 | 0.6955 | 0.7045 | 1747 | 8327 | 9926 | 1854 | 8471 | 9675 | 76.23  | 36.39  |
| 20000 | 1.18 | 0.3  | 0.7  | 2124 | 8400 | 9800 | 26.14 | 0.2955 | 0.3045 | 0.6955 | 0.7045 | 1747 | 8327 | 9926 | 1854 | 8471 | 9675 | 83.83  | 41.45  |
| 20000 | 1.19 | 0.3  | 0.7  | 2142 | 8400 | 9800 | 28.99 | 0.2955 | 0.3045 | 0.6955 | 0.7045 | 1747 | 8327 | 9926 | 1854 | 8471 | 9675 | 91.79  | 46.86  |
| 20000 | 1.20 | 0.3  | 0.7  | 2160 | 8400 | 9800 | 31.96 | 0.2955 | 0.3045 | 0.6955 | 0.7045 | 1747 | 8327 | 9926 | 1854 | 8471 | 9675 | 100.13 | 52.62  |
| 20000 | 0.80 | 0.35 | 0.65 | 1960 | 9100 | 8450 | 46.70 | 0.3453 | 0.3547 | 0.6453 | 0.6547 | 2385 | 9043 | 8572 | 2516 | 9155 | 8329 | 77.83  | 124.91 |
| 20000 | 0.81 | 0.35 | 0.65 | 1985 | 9100 | 8450 | 41.88 | 0.3453 | 0.3547 | 0.6453 | 0.6547 | 2385 | 9043 | 8572 | 2516 | 9155 | 8329 | 69.35  | 114.33 |
| 20000 | 0.82 | 0.35 | 0.65 | 2009 | 9100 | 8450 | 37.36 | 0.3453 | 0.3547 | 0.6453 | 0.6547 | 2385 | 9043 | 8572 | 2516 | 9155 | 8329 | 61.37  | 104.21 |
| 20000 | 0.83 | 0.35 | 0.65 | 2034 | 9100 | 8450 | 33.12 | 0.3453 | 0.3547 | 0.6453 | 0.6547 | 2385 | 9043 | 8572 | 2516 | 9155 | 8329 | 53.90  | 94.58  |
| 20000 | 0.84 | 0.35 | 0.65 | 2058 | 9100 | 8450 | 29.15 | 0.3453 | 0.3547 | 0.6453 | 0.6547 | 2385 | 9043 | 8572 | 2516 | 9155 | 8329 | 46.93  | 85.43  |
| 20000 | 0.85 | 0.35 | 0.65 | 2083 | 9100 | 8450 | 25.47 | 0.3453 | 0.3547 | 0.6453 | 0.6547 | 2385 | 9043 | 8572 | 2516 | 9155 | 8329 | 40.46  | 76.75  |
| 20000 | 0.86 | 0.35 | 0.65 | 2107 | 9100 | 8450 | 22.05 | 0.3453 | 0.3547 | 0.6453 | 0.6547 | 2385 | 9043 | 8572 | 2516 | 9155 | 8329 | 34.50  | 68.54  |
| 20000 | 0.87 | 0.35 | 0.65 | 2132 | 9100 | 8450 | 18.90 | 0.3453 | 0.3547 | 0.6453 | 0.6547 | 2385 | 9043 | 8572 | 2516 | 9155 | 8329 | 29.04  | 60.82  |
| 20000 | 0.88 | 0.35 | 0.65 | 2156 | 9100 | 8450 | 16.00 | 0.3453 | 0.3547 | 0.6453 | 0.6547 | 2385 | 9043 | 8572 | 2516 | 9155 | 8329 | 24.08  | 53.57  |
| 20000 | 0.89 | 0.35 | 0.65 | 2181 | 9100 | 8450 | 13.37 | 0.3453 | 0.3547 | 0.6453 | 0.6547 | 2385 | 9043 | 8572 | 2516 | 9155 | 8329 | 19.63  | 46.80  |
| 20000 | 0.90 | 0.35 | 0.65 | 2205 | 9100 | 8450 | 10.98 | 0.3453 | 0.3547 | 0.6453 | 0.6547 | 2385 | 9043 | 8572 | 2516 | 9155 | 8329 | 15.68  | 40.51  |
| 20000 | 0.91 | 0.35 | 0.65 | 2230 | 9100 | 8450 | 8.84  | 0.3453 | 0.3547 | 0.6453 | 0.6547 | 2385 | 9043 | 8572 | 2516 | 9155 | 8329 | 12.23  | 34.69  |
| 20000 | 0.92 | 0.35 | 0.65 | 2254 | 9100 | 8450 | 6.94  | 0.3453 | 0.3547 | 0.6453 | 0.6547 | 2385 | 9043 | 8572 | 2516 | 9155 | 8329 | 9.29   | 29.35  |
| 20000 | 0.93 | 0.35 | 0.65 | 2279 | 9100 | 8450 | 5.28  | 0.3453 | 0.3547 | 0.6453 | 0.6547 | 2385 | 9043 | 8572 | 2516 | 9155 | 8329 | 6.85   | 24.49  |
| 20000 | 0.94 | 0.35 | 0.65 | 2303 | 9100 | 8450 | 3.86  | 0.3453 | 0.3547 | 0.6453 | 0.6547 | 2385 | 9043 | 8572 | 2516 | 9155 | 8329 | 4.91   | 20.11  |
| 20000 | 0.95 | 0.35 | 0.65 | 2328 | 9100 | 8450 | 2.66  | 0.3453 | 0.3547 | 0.6453 | 0.6547 | 2385 | 9043 | 8572 | 2516 | 9155 | 8329 | 3.48   | 16.20  |
| 20000 | 0.96 | 0.35 | 0.65 | 2352 | 9100 | 8450 | 1.70  | 0.3453 | 0.3547 | 0.6453 | 0.6547 | 2385 | 9043 | 8572 | 2516 | 9155 | 8329 | 2.55   | 12.77  |
| 20000 | 0.97 | 0.35 | 0.65 | 2377 | 9100 | 8450 | 0.95  | 0.3453 | 0.3547 | 0.6453 | 0.6547 | 2385 | 9043 | 8572 | 2516 | 9155 | 8329 | 2.12   | 9.82   |
| 20000 | 0.98 | 0.35 | 0.65 | 2401 | 9100 | 8450 | 0.42  | 0.3453 | 0.3547 | 0.6453 | 0.6547 | 2385 | 9043 | 8572 | 2516 | 9155 | 8329 | 2.20   | 7.34   |
| 20000 | 0.99 | 0.35 | 0.65 | 2426 | 9100 | 8450 | 0.10  | 0.3453 | 0.3547 | 0.6453 | 0.6547 | 2385 | 9043 | 8572 | 2516 | 9155 | 8329 | 2.78   | 5.34   |
| 20000 | 1.00 | 0.35 | 0.65 | 2450 | 9100 | 8450 | 0.00  | 0.3453 | 0.3547 | 0.6453 | 0.6547 | 2385 | 9043 | 8572 | 2516 | 9155 | 8329 | 3.87   | 3.82   |
| 20000 | 1.01 | 0.35 | 0.65 | 2475 | 9100 | 8450 | 0.10  | 0.3453 | 0.3547 | 0.6453 | 0.6547 | 2385 | 9043 | 8572 | 2516 | 9155 | 8329 | 5.45   | 2.77   |
| 20000 | 1.02 | 0.35 | 0.65 | 2499 | 9100 | 8450 | 0.41  | 0.3453 | 0.3547 | 0.6453 | 0.6547 | 2385 | 9043 | 8572 | 2516 | 9155 | 8329 | 7.54   | 2.21   |
| 20000 | 1.03 | 0.35 | 0.65 | 2524 | 9100 | 8450 | 0.92  | 0.3453 | 0.3547 | 0.6453 | 0.6547 | 2385 | 9043 | 8572 | 2516 | 9155 | 8329 | 10.14  | 2.12   |
| 20000 | 1.04 | 0.35 | 0.65 | 2548 | 9100 | 8450 | 1.62  | 0.3453 | 0.3547 | 0.6453 | 0.6547 | 2385 | 9043 | 8572 | 2516 | 9155 | 8329 | 13.23  | 2.50   |
| 20000 | 1.05 | 0.35 | 0.65 | 2573 | 9100 | 8450 | 2.51  | 0.3453 | 0.3547 | 0.6453 | 0.6547 | 2385 | 9043 | 8572 | 2516 | 9155 | 8329 | 16.84  | 3.37   |
| 20000 | 1.06 | 0.35 | 0.65 | 2597 | 9100 | 8450 | 3.60  | 0.3453 | 0.3547 | 0.6453 | 0.6547 | 2385 | 9043 | 8572 | 2516 | 9155 | 8329 | 20.94  | 4.71   |
| 20000 | 1.07 | 0.35 | 0.65 | 2622 | 9100 | 8450 | 4.87  | 0.3453 | 0.3547 | 0.6453 | 0.6547 | 2385 | 9043 | 8572 | 2516 | 9155 | 8329 | 25.55  | 6.53   |
| 20000 | 1.08 | 0.35 | 0.65 | 2646 | 9100 | 8450 | 6.33  | 0.3453 | 0.3547 | 0.6453 | 0.6547 | 2385 | 9043 | 8572 | 2516 | 9155 | 8329 | 30.66  | 8.82   |
| 20000 | 1.09 | 0.35 | 0.65 | 2671 | 9100 | 8450 | 7.97  | 0.3453 | 0.3547 | 0.6453 | 0.6547 | 2385 | 9043 | 8572 | 2516 | 9155 | 8329 | 36.27  | 11.60  |
| 20000 | 1.10 | 0.35 | 0.65 | 2695 | 9100 | 8450 | 9.78  | 0.3453 | 0.3547 | 0.6453 | 0.6547 | 2385 | 9043 | 8572 | 2516 | 9155 | 8329 | 42.39  | 14.85  |

|       |      |      |      |      |      |      |       |        |        |        |        |      |      |      |      |      |      |        |        |
|-------|------|------|------|------|------|------|-------|--------|--------|--------|--------|------|------|------|------|------|------|--------|--------|
| 20000 | 1.11 | 0.35 | 0.65 | 2720 | 9100 | 8450 | 11.77 | 0.3453 | 0.3547 | 0.6453 | 0.6547 | 2385 | 9043 | 8572 | 2516 | 9155 | 8329 | 49.01  | 18.57  |
| 20000 | 1.12 | 0.35 | 0.65 | 2744 | 9100 | 8450 | 13.93 | 0.3453 | 0.3547 | 0.6453 | 0.6547 | 2385 | 9043 | 8572 | 2516 | 9155 | 8329 | 56.13  | 22.78  |
| 20000 | 1.13 | 0.35 | 0.65 | 2769 | 9100 | 8450 | 16.26 | 0.3453 | 0.3547 | 0.6453 | 0.6547 | 2385 | 9043 | 8572 | 2516 | 9155 | 8329 | 63.76  | 27.46  |
| 20000 | 1.14 | 0.35 | 0.65 | 2793 | 9100 | 8450 | 18.75 | 0.3453 | 0.3547 | 0.6453 | 0.6547 | 2385 | 9043 | 8572 | 2516 | 9155 | 8329 | 71.89  | 32.62  |
| 20000 | 1.15 | 0.35 | 0.65 | 2818 | 9100 | 8450 | 21.41 | 0.3453 | 0.3547 | 0.6453 | 0.6547 | 2385 | 9043 | 8572 | 2516 | 9155 | 8329 | 80.53  | 38.25  |
| 20000 | 1.16 | 0.35 | 0.65 | 2842 | 9100 | 8450 | 24.23 | 0.3453 | 0.3547 | 0.6453 | 0.6547 | 2385 | 9043 | 8572 | 2516 | 9155 | 8329 | 89.66  | 44.37  |
| 20000 | 1.17 | 0.35 | 0.65 | 2867 | 9100 | 8450 | 27.20 | 0.3453 | 0.3547 | 0.6453 | 0.6547 | 2385 | 9043 | 8572 | 2516 | 9155 | 8329 | 99.30  | 50.96  |
| 20000 | 1.18 | 0.35 | 0.65 | 2891 | 9100 | 8450 | 30.33 | 0.3453 | 0.3547 | 0.6453 | 0.6547 | 2385 | 9043 | 8572 | 2516 | 9155 | 8329 | 109.45 | 58.03  |
| 20000 | 1.19 | 0.35 | 0.65 | 2916 | 9100 | 8450 | 33.62 | 0.3453 | 0.3547 | 0.6453 | 0.6547 | 2385 | 9043 | 8572 | 2516 | 9155 | 8329 | 120.10 | 65.57  |
| 20000 | 1.20 | 0.35 | 0.65 | 2940 | 9100 | 8450 | 37.05 | 0.3453 | 0.3547 | 0.6453 | 0.6547 | 2385 | 9043 | 8572 | 2516 | 9155 | 8329 | 131.25 | 73.59  |
| 20000 | 0.80 | 0.4  | 0.6  | 2560 | 9600 | 7200 | 52.70 | 0.3952 | 0.4048 | 0.5952 | 0.6048 | 3124 | 9561 | 7316 | 3277 | 9637 | 7085 | 103.70 | 158.99 |
| 20000 | 0.81 | 0.4  | 0.6  | 2592 | 9600 | 7200 | 47.23 | 0.3952 | 0.4048 | 0.5952 | 0.6048 | 3124 | 9561 | 7316 | 3277 | 9637 | 7085 | 92.48  | 145.30 |
| 20000 | 0.82 | 0.4  | 0.6  | 2624 | 9600 | 7200 | 42.09 | 0.3952 | 0.4048 | 0.5952 | 0.6048 | 3124 | 9561 | 7316 | 3277 | 9637 | 7085 | 81.91  | 132.23 |
| 20000 | 0.83 | 0.4  | 0.6  | 2656 | 9600 | 7200 | 37.29 | 0.3952 | 0.4048 | 0.5952 | 0.6048 | 3124 | 9561 | 7316 | 3277 | 9637 | 7085 | 72.00  | 119.78 |
| 20000 | 0.84 | 0.4  | 0.6  | 2688 | 9600 | 7200 | 32.80 | 0.3952 | 0.4048 | 0.5952 | 0.6048 | 3124 | 9561 | 7316 | 3277 | 9637 | 7085 | 62.75  | 107.96 |
| 20000 | 0.85 | 0.4  | 0.6  | 2720 | 9600 | 7200 | 28.63 | 0.3952 | 0.4048 | 0.5952 | 0.6048 | 3124 | 9561 | 7316 | 3277 | 9637 | 7085 | 54.15  | 96.77  |
| 20000 | 0.86 | 0.4  | 0.6  | 2752 | 9600 | 7200 | 24.77 | 0.3952 | 0.4048 | 0.5952 | 0.6048 | 3124 | 9561 | 7316 | 3277 | 9637 | 7085 | 46.21  | 86.20  |
| 20000 | 0.87 | 0.4  | 0.6  | 2784 | 9600 | 7200 | 21.21 | 0.3952 | 0.4048 | 0.5952 | 0.6048 | 3124 | 9561 | 7316 | 3277 | 9637 | 7085 | 38.92  | 76.25  |
| 20000 | 0.88 | 0.4  | 0.6  | 2816 | 9600 | 7200 | 17.95 | 0.3952 | 0.4048 | 0.5952 | 0.6048 | 3124 | 9561 | 7316 | 3277 | 9637 | 7085 | 32.29  | 66.93  |
| 20000 | 0.89 | 0.4  | 0.6  | 2848 | 9600 | 7200 | 14.98 | 0.3952 | 0.4048 | 0.5952 | 0.6048 | 3124 | 9561 | 7316 | 3277 | 9637 | 7085 | 26.32  | 58.23  |
| 20000 | 0.90 | 0.4  | 0.6  | 2880 | 9600 | 7200 | 12.30 | 0.3952 | 0.4048 | 0.5952 | 0.6048 | 3124 | 9561 | 7316 | 3277 | 9637 | 7085 | 21.00  | 50.16  |
| 20000 | 0.91 | 0.4  | 0.6  | 2912 | 9600 | 7200 | 9.90  | 0.3952 | 0.4048 | 0.5952 | 0.6048 | 3124 | 9561 | 7316 | 3277 | 9637 | 7085 | 16.33  | 42.72  |
| 20000 | 0.92 | 0.4  | 0.6  | 2944 | 9600 | 7200 | 7.77  | 0.3952 | 0.4048 | 0.5952 | 0.6048 | 3124 | 9561 | 7316 | 3277 | 9637 | 7085 | 12.32  | 35.90  |
| 20000 | 0.93 | 0.4  | 0.6  | 2976 | 9600 | 7200 | 5.91  | 0.3952 | 0.4048 | 0.5952 | 0.6048 | 3124 | 9561 | 7316 | 3277 | 9637 | 7085 | 8.97   | 29.70  |
| 20000 | 0.94 | 0.4  | 0.6  | 3008 | 9600 | 7200 | 4.31  | 0.3952 | 0.4048 | 0.5952 | 0.6048 | 3124 | 9561 | 7316 | 3277 | 9637 | 7085 | 6.27   | 24.13  |
| 20000 | 0.95 | 0.4  | 0.6  | 3040 | 9600 | 7200 | 2.97  | 0.3952 | 0.4048 | 0.5952 | 0.6048 | 3124 | 9561 | 7316 | 3277 | 9637 | 7085 | 4.23   | 19.18  |
| 20000 | 0.96 | 0.4  | 0.6  | 3072 | 9600 | 7200 | 1.89  | 0.3952 | 0.4048 | 0.5952 | 0.6048 | 3124 | 9561 | 7316 | 3277 | 9637 | 7085 | 2.85   | 14.86  |
| 20000 | 0.97 | 0.4  | 0.6  | 3104 | 9600 | 7200 | 1.06  | 0.3952 | 0.4048 | 0.5952 | 0.6048 | 3124 | 9561 | 7316 | 3277 | 9637 | 7085 | 2.11   | 11.17  |
| 20000 | 0.98 | 0.4  | 0.6  | 3136 | 9600 | 7200 | 0.47  | 0.3952 | 0.4048 | 0.5952 | 0.6048 | 3124 | 9561 | 7316 | 3277 | 9637 | 7085 | 2.04   | 8.09   |
| 20000 | 0.99 | 0.4  | 0.6  | 3168 | 9600 | 7200 | 0.12  | 0.3952 | 0.4048 | 0.5952 | 0.6048 | 3124 | 9561 | 7316 | 3277 | 9637 | 7085 | 2.62   | 5.65   |
| 20000 | 1.00 | 0.4  | 0.6  | 3200 | 9600 | 7200 | 0.00  | 0.3952 | 0.4048 | 0.5952 | 0.6048 | 3124 | 9561 | 7316 | 3277 | 9637 | 7085 | 3.86   | 3.83   |
| 20000 | 1.01 | 0.4  | 0.6  | 3232 | 9600 | 7200 | 0.11  | 0.3952 | 0.4048 | 0.5952 | 0.6048 | 3124 | 9561 | 7316 | 3277 | 9637 | 7085 | 5.75   | 2.63   |
| 20000 | 1.02 | 0.4  | 0.6  | 3264 | 9600 | 7200 | 0.45  | 0.3952 | 0.4048 | 0.5952 | 0.6048 | 3124 | 9561 | 7316 | 3277 | 9637 | 7085 | 8.30   | 2.06   |
| 20000 | 1.03 | 0.4  | 0.6  | 3296 | 9600 | 7200 | 1.02  | 0.3952 | 0.4048 | 0.5952 | 0.6048 | 3124 | 9561 | 7316 | 3277 | 9637 | 7085 | 11.50  | 2.11   |
| 20000 | 1.04 | 0.4  | 0.6  | 3328 | 9600 | 7200 | 1.80  | 0.3952 | 0.4048 | 0.5952 | 0.6048 | 3124 | 9561 | 7316 | 3277 | 9637 | 7085 | 15.36  | 2.79   |



|       |      |      |      |      |      |      |       |        |        |        |        |      |      |      |      |      |      |        |        |
|-------|------|------|------|------|------|------|-------|--------|--------|--------|--------|------|------|------|------|------|------|--------|--------|
| 20000 | 1.05 | 0.4  | 0.6  | 3360 | 9600 | 7200 | 2.79  | 0.3952 | 0.4048 | 0.5952 | 0.6048 | 3124 | 9561 | 7316 | 3277 | 9637 | 7085 | 19.88  | 4.09   |
| 20000 | 1.06 | 0.4  | 0.6  | 3392 | 9600 | 7200 | 3.99  | 0.3952 | 0.4048 | 0.5952 | 0.6048 | 3124 | 9561 | 7316 | 3277 | 9637 | 7085 | 25.05  | 6.02   |
| 20000 | 1.07 | 0.4  | 0.6  | 3424 | 9600 | 7200 | 5.40  | 0.3952 | 0.4048 | 0.5952 | 0.6048 | 3124 | 9561 | 7316 | 3277 | 9637 | 7085 | 30.87  | 8.57   |
| 20000 | 1.08 | 0.4  | 0.6  | 3456 | 9600 | 7200 | 7.01  | 0.3952 | 0.4048 | 0.5952 | 0.6048 | 3124 | 9561 | 7316 | 3277 | 9637 | 7085 | 37.35  | 11.75  |
| 20000 | 1.09 | 0.4  | 0.6  | 3488 | 9600 | 7200 | 8.82  | 0.3952 | 0.4048 | 0.5952 | 0.6048 | 3124 | 9561 | 7316 | 3277 | 9637 | 7085 | 44.49  | 15.55  |
| 20000 | 1.10 | 0.4  | 0.6  | 3520 | 9600 | 7200 | 10.82 | 0.3952 | 0.4048 | 0.5952 | 0.6048 | 3124 | 9561 | 7316 | 3277 | 9637 | 7085 | 52.28  | 19.98  |
| 20000 | 1.11 | 0.4  | 0.6  | 3552 | 9600 | 7200 | 13.01 | 0.3952 | 0.4048 | 0.5952 | 0.6048 | 3124 | 9561 | 7316 | 3277 | 9637 | 7085 | 60.73  | 25.03  |
| 20000 | 1.12 | 0.4  | 0.6  | 3584 | 9600 | 7200 | 15.39 | 0.3952 | 0.4048 | 0.5952 | 0.6048 | 3124 | 9561 | 7316 | 3277 | 9637 | 7085 | 69.84  | 30.71  |
| 20000 | 1.13 | 0.4  | 0.6  | 3616 | 9600 | 7200 | 17.96 | 0.3952 | 0.4048 | 0.5952 | 0.6048 | 3124 | 9561 | 7316 | 3277 | 9637 | 7085 | 79.60  | 37.01  |
| 20000 | 1.14 | 0.4  | 0.6  | 3648 | 9600 | 7200 | 20.70 | 0.3952 | 0.4048 | 0.5952 | 0.6048 | 3124 | 9561 | 7316 | 3277 | 9637 | 7085 | 90.01  | 43.94  |
| 20000 | 1.15 | 0.4  | 0.6  | 3680 | 9600 | 7200 | 23.62 | 0.3952 | 0.4048 | 0.5952 | 0.6048 | 3124 | 9561 | 7316 | 3277 | 9637 | 7085 | 101.08 | 51.49  |
| 20000 | 1.16 | 0.4  | 0.6  | 3712 | 9600 | 7200 | 26.72 | 0.3952 | 0.4048 | 0.5952 | 0.6048 | 3124 | 9561 | 7316 | 3277 | 9637 | 7085 | 112.81 | 59.67  |
| 20000 | 1.17 | 0.4  | 0.6  | 3744 | 9600 | 7200 | 29.98 | 0.3952 | 0.4048 | 0.5952 | 0.6048 | 3124 | 9561 | 7316 | 3277 | 9637 | 7085 | 125.19 | 68.47  |
| 20000 | 1.18 | 0.4  | 0.6  | 3776 | 9600 | 7200 | 33.41 | 0.3952 | 0.4048 | 0.5952 | 0.6048 | 3124 | 9561 | 7316 | 3277 | 9637 | 7085 | 138.23 | 77.90  |
| 20000 | 1.19 | 0.4  | 0.6  | 3808 | 9600 | 7200 | 37.01 | 0.3952 | 0.4048 | 0.5952 | 0.6048 | 3124 | 9561 | 7316 | 3277 | 9637 | 7085 | 151.93 | 87.95  |
| 20000 | 1.20 | 0.4  | 0.6  | 3840 | 9600 | 7200 | 40.77 | 0.3952 | 0.4048 | 0.5952 | 0.6048 | 3124 | 9561 | 7316 | 3277 | 9637 | 7085 | 166.28 | 98.63  |
| 20000 | 0.80 | 0.45 | 0.55 | 3240 | 9900 | 6050 | 56.78 | 0.4451 | 0.4549 | 0.5451 | 0.5549 | 3963 | 9880 | 6158 | 4138 | 9919 | 5943 | 133.74 | 196.92 |
| 20000 | 0.81 | 0.45 | 0.55 | 3281 | 9900 | 6050 | 50.85 | 0.4451 | 0.4549 | 0.5451 | 0.5549 | 3963 | 9880 | 6158 | 4138 | 9919 | 5943 | 119.38 | 179.74 |
| 20000 | 0.82 | 0.45 | 0.55 | 3321 | 9900 | 6050 | 45.29 | 0.4451 | 0.4549 | 0.5451 | 0.5549 | 3963 | 9880 | 6158 | 4138 | 9919 | 5943 | 105.85 | 163.34 |
| 20000 | 0.83 | 0.45 | 0.55 | 3362 | 9900 | 6050 | 40.09 | 0.4451 | 0.4549 | 0.5451 | 0.5549 | 3963 | 9880 | 6158 | 4138 | 9919 | 5943 | 93.14  | 147.74 |
| 20000 | 0.84 | 0.45 | 0.55 | 3402 | 9900 | 6050 | 35.24 | 0.4451 | 0.4549 | 0.5451 | 0.5549 | 3963 | 9880 | 6158 | 4138 | 9919 | 5943 | 81.27  | 132.94 |
| 20000 | 0.85 | 0.45 | 0.55 | 3443 | 9900 | 6050 | 30.74 | 0.4451 | 0.4549 | 0.5451 | 0.5549 | 3963 | 9880 | 6158 | 4138 | 9919 | 5943 | 70.22  | 118.92 |
| 20000 | 0.86 | 0.45 | 0.55 | 3483 | 9900 | 6050 | 26.57 | 0.4451 | 0.4549 | 0.5451 | 0.5549 | 3963 | 9880 | 6158 | 4138 | 9919 | 5943 | 60.00  | 105.70 |
| 20000 | 0.87 | 0.45 | 0.55 | 3524 | 9900 | 6050 | 22.74 | 0.4451 | 0.4549 | 0.5451 | 0.5549 | 3963 | 9880 | 6158 | 4138 | 9919 | 5943 | 50.61  | 93.27  |
| 20000 | 0.88 | 0.45 | 0.55 | 3564 | 9900 | 6050 | 19.23 | 0.4451 | 0.4549 | 0.5451 | 0.5549 | 3963 | 9880 | 6158 | 4138 | 9919 | 5943 | 42.05  | 81.64  |
| 20000 | 0.89 | 0.45 | 0.55 | 3605 | 9900 | 6050 | 16.04 | 0.4451 | 0.4549 | 0.5451 | 0.5549 | 3963 | 9880 | 6158 | 4138 | 9919 | 5943 | 34.31  | 70.79  |
| 20000 | 0.90 | 0.45 | 0.55 | 3645 | 9900 | 6050 | 13.16 | 0.4451 | 0.4549 | 0.5451 | 0.5549 | 3963 | 9880 | 6158 | 4138 | 9919 | 5943 | 27.40  | 60.74  |
| 20000 | 0.91 | 0.45 | 0.55 | 3686 | 9900 | 6050 | 10.58 | 0.4451 | 0.4549 | 0.5451 | 0.5549 | 3963 | 9880 | 6158 | 4138 | 9919 | 5943 | 21.32  | 51.48  |
| 20000 | 0.92 | 0.45 | 0.55 | 3726 | 9900 | 6050 | 8.30  | 0.4451 | 0.4549 | 0.5451 | 0.5549 | 3963 | 9880 | 6158 | 4138 | 9919 | 5943 | 16.07  | 43.02  |
| 20000 | 0.93 | 0.45 | 0.55 | 3767 | 9900 | 6050 | 6.31  | 0.4451 | 0.4549 | 0.5451 | 0.5549 | 3963 | 9880 | 6158 | 4138 | 9919 | 5943 | 11.64  | 35.35  |
| 20000 | 0.94 | 0.45 | 0.55 | 3807 | 9900 | 6050 | 4.60  | 0.4451 | 0.4549 | 0.5451 | 0.5549 | 3963 | 9880 | 6158 | 4138 | 9919 | 5943 | 8.05   | 28.47  |
| 20000 | 0.95 | 0.45 | 0.55 | 3848 | 9900 | 6050 | 3.17  | 0.4451 | 0.4549 | 0.5451 | 0.5549 | 3963 | 9880 | 6158 | 4138 | 9919 | 5943 | 5.28   | 22.38  |
| 20000 | 0.96 | 0.45 | 0.55 | 3888 | 9900 | 6050 | 2.02  | 0.4451 | 0.4549 | 0.5451 | 0.5549 | 3963 | 9880 | 6158 | 4138 | 9919 | 5943 | 3.34   | 17.08  |
| 20000 | 0.97 | 0.45 | 0.55 | 3929 | 9900 | 6050 | 1.13  | 0.4451 | 0.4549 | 0.5451 | 0.5549 | 3963 | 9880 | 6158 | 4138 | 9919 | 5943 | 2.22   | 12.58  |
| 20000 | 0.98 | 0.45 | 0.55 | 3969 | 9900 | 6050 | 0.50  | 0.4451 | 0.4549 | 0.5451 | 0.5549 | 3963 | 9880 | 6158 | 4138 | 9919 | 5943 | 1.94   | 8.87   |

|       |      |      |      |      |       |      |       |        |        |        |        |      |      |      |      |      |      |        |        |
|-------|------|------|------|------|-------|------|-------|--------|--------|--------|--------|------|------|------|------|------|------|--------|--------|
| 20000 | 0.99 | 0.45 | 0.55 | 4010 | 9900  | 6050 | 0.12  | 0.4451 | 0.4549 | 0.5451 | 0.5549 | 3963 | 9880 | 6158 | 4138 | 9919 | 5943 | 2.48   | 5.96   |
| 20000 | 1.00 | 0.45 | 0.55 | 4050 | 9900  | 6050 | 0.00  | 0.4451 | 0.4549 | 0.5451 | 0.5549 | 3963 | 9880 | 6158 | 4138 | 9919 | 5943 | 3.85   | 3.83   |
| 20000 | 1.01 | 0.45 | 0.55 | 4091 | 9900  | 6050 | 0.12  | 0.4451 | 0.4549 | 0.5451 | 0.5549 | 3963 | 9880 | 6158 | 4138 | 9919 | 5943 | 6.05   | 2.50   |
| 20000 | 1.02 | 0.45 | 0.55 | 4131 | 9900  | 6050 | 0.48  | 0.4451 | 0.4549 | 0.5451 | 0.5549 | 3963 | 9880 | 6158 | 4138 | 9919 | 5943 | 9.07   | 1.97   |
| 20000 | 1.03 | 0.45 | 0.55 | 4172 | 9900  | 6050 | 1.08  | 0.4451 | 0.4549 | 0.5451 | 0.5549 | 3963 | 9880 | 6158 | 4138 | 9919 | 5943 | 12.93  | 2.22   |
| 20000 | 1.04 | 0.45 | 0.55 | 4212 | 9900  | 6050 | 1.91  | 0.4451 | 0.4549 | 0.5451 | 0.5549 | 3963 | 9880 | 6158 | 4138 | 9919 | 5943 | 17.61  | 3.27   |
| 20000 | 1.05 | 0.45 | 0.55 | 4253 | 9900  | 6050 | 2.96  | 0.4451 | 0.4549 | 0.5451 | 0.5549 | 3963 | 9880 | 6158 | 4138 | 9919 | 5943 | 23.12  | 5.11   |
| 20000 | 1.06 | 0.45 | 0.55 | 4293 | 9900  | 6050 | 4.23  | 0.4451 | 0.4549 | 0.5451 | 0.5549 | 3963 | 9880 | 6158 | 4138 | 9919 | 5943 | 29.46  | 7.74   |
| 20000 | 1.07 | 0.45 | 0.55 | 4334 | 9900  | 6050 | 5.72  | 0.4451 | 0.4549 | 0.5451 | 0.5549 | 3963 | 9880 | 6158 | 4138 | 9919 | 5943 | 36.62  | 11.17  |
| 20000 | 1.08 | 0.45 | 0.55 | 4374 | 9900  | 6050 | 7.42  | 0.4451 | 0.4549 | 0.5451 | 0.5549 | 3963 | 9880 | 6158 | 4138 | 9919 | 5943 | 44.61  | 15.39  |
| 20000 | 1.09 | 0.45 | 0.55 | 4415 | 9900  | 6050 | 9.33  | 0.4451 | 0.4549 | 0.5451 | 0.5549 | 3963 | 9880 | 6158 | 4138 | 9919 | 5943 | 53.43  | 20.40  |
| 20000 | 1.10 | 0.45 | 0.55 | 4455 | 9900  | 6050 | 11.45 | 0.4451 | 0.4549 | 0.5451 | 0.5549 | 3963 | 9880 | 6158 | 4138 | 9919 | 5943 | 63.08  | 26.20  |
| 20000 | 1.11 | 0.45 | 0.55 | 4496 | 9900  | 6050 | 13.76 | 0.4451 | 0.4549 | 0.5451 | 0.5549 | 3963 | 9880 | 6158 | 4138 | 9919 | 5943 | 73.56  | 32.80  |
| 20000 | 1.12 | 0.45 | 0.55 | 4536 | 9900  | 6050 | 16.27 | 0.4451 | 0.4549 | 0.5451 | 0.5549 | 3963 | 9880 | 6158 | 4138 | 9919 | 5943 | 84.86  | 40.19  |
| 20000 | 1.13 | 0.45 | 0.55 | 4577 | 9900  | 6050 | 18.97 | 0.4451 | 0.4549 | 0.5451 | 0.5549 | 3963 | 9880 | 6158 | 4138 | 9919 | 5943 | 97.00  | 48.37  |
| 20000 | 1.14 | 0.45 | 0.55 | 4617 | 9900  | 6050 | 21.85 | 0.4451 | 0.4549 | 0.5451 | 0.5549 | 3963 | 9880 | 6158 | 4138 | 9919 | 5943 | 109.96 | 57.34  |
| 20000 | 1.15 | 0.45 | 0.55 | 4658 | 9900  | 6050 | 24.92 | 0.4451 | 0.4549 | 0.5451 | 0.5549 | 3963 | 9880 | 6158 | 4138 | 9919 | 5943 | 123.74 | 67.11  |
| 20000 | 1.16 | 0.45 | 0.55 | 4698 | 9900  | 6050 | 28.18 | 0.4451 | 0.4549 | 0.5451 | 0.5549 | 3963 | 9880 | 6158 | 4138 | 9919 | 5943 | 138.36 | 77.67  |
| 20000 | 1.17 | 0.45 | 0.55 | 4739 | 9900  | 6050 | 31.60 | 0.4451 | 0.4549 | 0.5451 | 0.5549 | 3963 | 9880 | 6158 | 4138 | 9919 | 5943 | 153.80 | 89.02  |
| 20000 | 1.18 | 0.45 | 0.55 | 4779 | 9900  | 6050 | 35.21 | 0.4451 | 0.4549 | 0.5451 | 0.5549 | 3963 | 9880 | 6158 | 4138 | 9919 | 5943 | 170.07 | 101.17 |
| 20000 | 1.19 | 0.45 | 0.55 | 4820 | 9900  | 6050 | 38.98 | 0.4451 | 0.4549 | 0.5451 | 0.5549 | 3963 | 9880 | 6158 | 4138 | 9919 | 5943 | 187.17 | 114.11 |
| 20000 | 1.20 | 0.45 | 0.55 | 4860 | 9900  | 6050 | 42.92 | 0.4451 | 0.4549 | 0.5451 | 0.5549 | 3963 | 9880 | 6158 | 4138 | 9919 | 5943 | 205.10 | 127.84 |
| 20000 | 0.80 | 0.5  | 0.5  | 4000 | 10000 | 5000 | 58.64 | 0.4951 | 0.5049 | 0.4951 | 0.5049 | 4902 | 9999 | 5098 | 5098 | 9999 | 4902 | 168.04 | 238.61 |
| 20000 | 0.81 | 0.5  | 0.5  | 4050 | 10000 | 5000 | 52.48 | 0.4951 | 0.5049 | 0.4951 | 0.5049 | 4902 | 9999 | 5098 | 5098 | 9999 | 4902 | 150.14 | 217.56 |
| 20000 | 0.82 | 0.5  | 0.5  | 4100 | 10000 | 5000 | 46.71 | 0.4951 | 0.5049 | 0.4951 | 0.5049 | 4902 | 9999 | 5098 | 5098 | 9999 | 4902 | 133.26 | 197.48 |
| 20000 | 0.83 | 0.5  | 0.5  | 4150 | 10000 | 5000 | 41.31 | 0.4951 | 0.5049 | 0.4951 | 0.5049 | 4902 | 9999 | 5098 | 5098 | 9999 | 4902 | 117.40 | 178.39 |
| 20000 | 0.84 | 0.5  | 0.5  | 4200 | 10000 | 5000 | 36.29 | 0.4951 | 0.5049 | 0.4951 | 0.5049 | 4902 | 9999 | 5098 | 5098 | 9999 | 4902 | 102.56 | 160.27 |
| 20000 | 0.85 | 0.5  | 0.5  | 4250 | 10000 | 5000 | 31.64 | 0.4951 | 0.5049 | 0.4951 | 0.5049 | 4902 | 9999 | 5098 | 5098 | 9999 | 4902 | 88.74  | 143.14 |
| 20000 | 0.86 | 0.5  | 0.5  | 4300 | 10000 | 5000 | 27.34 | 0.4951 | 0.5049 | 0.4951 | 0.5049 | 4902 | 9999 | 5098 | 5098 | 9999 | 4902 | 75.94  | 126.99 |
| 20000 | 0.87 | 0.5  | 0.5  | 4350 | 10000 | 5000 | 23.38 | 0.4951 | 0.5049 | 0.4951 | 0.5049 | 4902 | 9999 | 5098 | 5098 | 9999 | 4902 | 64.16  | 111.82 |
| 20000 | 0.88 | 0.5  | 0.5  | 4400 | 10000 | 5000 | 19.76 | 0.4951 | 0.5049 | 0.4951 | 0.5049 | 4902 | 9999 | 5098 | 5098 | 9999 | 4902 | 53.40  | 97.63  |
| 20000 | 0.89 | 0.5  | 0.5  | 4450 | 10000 | 5000 | 16.47 | 0.4951 | 0.5049 | 0.4951 | 0.5049 | 4902 | 9999 | 5098 | 5098 | 9999 | 4902 | 43.66  | 84.42  |
| 20000 | 0.90 | 0.5  | 0.5  | 4500 | 10000 | 5000 | 13.50 | 0.4951 | 0.5049 | 0.4951 | 0.5049 | 4902 | 9999 | 5098 | 5098 | 9999 | 4902 | 34.94  | 72.19  |
| 20000 | 0.91 | 0.5  | 0.5  | 4550 | 10000 | 5000 | 10.85 | 0.4951 | 0.5049 | 0.4951 | 0.5049 | 4902 | 9999 | 5098 | 5098 | 9999 | 4902 | 27.25  | 60.94  |
| 20000 | 0.92 | 0.5  | 0.5  | 4600 | 10000 | 5000 | 8.51  | 0.4951 | 0.5049 | 0.4951 | 0.5049 | 4902 | 9999 | 5098 | 5098 | 9999 | 4902 | 20.57  | 50.68  |

|       |      |      |      |      |       |      |       |        |        |        |        |      |      |      |      |      |      |        |        |
|-------|------|------|------|------|-------|------|-------|--------|--------|--------|--------|------|------|------|------|------|------|--------|--------|
| 20000 | 0.93 | 0.5  | 0.5  | 4650 | 10000 | 5000 | 6.46  | 0.4951 | 0.5049 | 0.4951 | 0.5049 | 4902 | 9999 | 5098 | 5098 | 9999 | 4902 | 14.91  | 41.39  |
| 20000 | 0.94 | 0.5  | 0.5  | 4700 | 10000 | 5000 | 4.71  | 0.4951 | 0.5049 | 0.4951 | 0.5049 | 4902 | 9999 | 5098 | 5098 | 9999 | 4902 | 10.27  | 33.08  |
| 20000 | 0.95 | 0.5  | 0.5  | 4750 | 10000 | 5000 | 3.25  | 0.4951 | 0.5049 | 0.4951 | 0.5049 | 4902 | 9999 | 5098 | 5098 | 9999 | 4902 | 6.64   | 25.76  |
| 20000 | 0.96 | 0.5  | 0.5  | 4800 | 10000 | 5000 | 2.06  | 0.4951 | 0.5049 | 0.4951 | 0.5049 | 4902 | 9999 | 5098 | 5098 | 9999 | 4902 | 4.04   | 19.41  |
| 20000 | 0.97 | 0.5  | 0.5  | 4850 | 10000 | 5000 | 1.15  | 0.4951 | 0.5049 | 0.4951 | 0.5049 | 4902 | 9999 | 5098 | 5098 | 9999 | 4902 | 2.46   | 14.05  |
| 20000 | 0.98 | 0.5  | 0.5  | 4900 | 10000 | 5000 | 0.51  | 0.4951 | 0.5049 | 0.4951 | 0.5049 | 4902 | 9999 | 5098 | 5098 | 9999 | 4902 | 1.90   | 9.67   |
| 20000 | 0.99 | 0.5  | 0.5  | 4950 | 10000 | 5000 | 0.13  | 0.4951 | 0.5049 | 0.4951 | 0.5049 | 4902 | 9999 | 5098 | 5098 | 9999 | 4902 | 2.36   | 6.26   |
| 20000 | 1.00 | 0.5  | 0.5  | 5000 | 10000 | 5000 | 0.00  | 0.4951 | 0.5049 | 0.4951 | 0.5049 | 4902 | 9999 | 5098 | 5098 | 9999 | 4902 | 3.84   | 3.84   |
| 20000 | 1.01 | 0.5  | 0.5  | 5050 | 10000 | 5000 | 0.12  | 0.4951 | 0.5049 | 0.4951 | 0.5049 | 4902 | 9999 | 5098 | 5098 | 9999 | 4902 | 6.34   | 2.40   |
| 20000 | 1.02 | 0.5  | 0.5  | 5100 | 10000 | 5000 | 0.49  | 0.4951 | 0.5049 | 0.4951 | 0.5049 | 4902 | 9999 | 5098 | 5098 | 9999 | 4902 | 9.86   | 1.94   |
| 20000 | 1.03 | 0.5  | 0.5  | 5150 | 10000 | 5000 | 1.10  | 0.4951 | 0.5049 | 0.4951 | 0.5049 | 4902 | 9999 | 5098 | 5098 | 9999 | 4902 | 14.40  | 2.46   |
| 20000 | 1.04 | 0.5  | 0.5  | 5200 | 10000 | 5000 | 1.94  | 0.4951 | 0.5049 | 0.4951 | 0.5049 | 4902 | 9999 | 5098 | 5098 | 9999 | 4902 | 19.96  | 3.96   |
| 20000 | 1.05 | 0.5  | 0.5  | 5250 | 10000 | 5000 | 3.01  | 0.4951 | 0.5049 | 0.4951 | 0.5049 | 4902 | 9999 | 5098 | 5098 | 9999 | 4902 | 26.54  | 6.44   |
| 20000 | 1.06 | 0.5  | 0.5  | 5300 | 10000 | 5000 | 4.31  | 0.4951 | 0.5049 | 0.4951 | 0.5049 | 4902 | 9999 | 5098 | 5098 | 9999 | 4902 | 34.14  | 9.91   |
| 20000 | 1.07 | 0.5  | 0.5  | 5350 | 10000 | 5000 | 5.82  | 0.4951 | 0.5049 | 0.4951 | 0.5049 | 4902 | 9999 | 5098 | 5098 | 9999 | 4902 | 42.75  | 14.35  |
| 20000 | 1.08 | 0.5  | 0.5  | 5400 | 10000 | 5000 | 7.54  | 0.4951 | 0.5049 | 0.4951 | 0.5049 | 4902 | 9999 | 5098 | 5098 | 9999 | 4902 | 52.39  | 19.77  |
| 20000 | 1.09 | 0.5  | 0.5  | 5450 | 10000 | 5000 | 9.48  | 0.4951 | 0.5049 | 0.4951 | 0.5049 | 4902 | 9999 | 5098 | 5098 | 9999 | 4902 | 63.05  | 26.18  |
| 20000 | 1.10 | 0.5  | 0.5  | 5500 | 10000 | 5000 | 11.62 | 0.4951 | 0.5049 | 0.4951 | 0.5049 | 4902 | 9999 | 5098 | 5098 | 9999 | 4902 | 74.73  | 33.56  |
| 20000 | 1.11 | 0.5  | 0.5  | 5550 | 10000 | 5000 | 13.96 | 0.4951 | 0.5049 | 0.4951 | 0.5049 | 4902 | 9999 | 5098 | 5098 | 9999 | 4902 | 87.43  | 41.93  |
| 20000 | 1.12 | 0.5  | 0.5  | 5600 | 10000 | 5000 | 16.50 | 0.4951 | 0.5049 | 0.4951 | 0.5049 | 4902 | 9999 | 5098 | 5098 | 9999 | 4902 | 101.14 | 51.27  |
| 20000 | 1.13 | 0.5  | 0.5  | 5650 | 10000 | 5000 | 19.23 | 0.4951 | 0.5049 | 0.4951 | 0.5049 | 4902 | 9999 | 5098 | 5098 | 9999 | 4902 | 115.88 | 61.60  |
| 20000 | 1.14 | 0.5  | 0.5  | 5700 | 10000 | 5000 | 22.15 | 0.4951 | 0.5049 | 0.4951 | 0.5049 | 4902 | 9999 | 5098 | 5098 | 9999 | 4902 | 131.64 | 72.91  |
| 20000 | 1.15 | 0.5  | 0.5  | 5750 | 10000 | 5000 | 25.25 | 0.4951 | 0.5049 | 0.4951 | 0.5049 | 4902 | 9999 | 5098 | 5098 | 9999 | 4902 | 148.42 | 85.20  |
| 20000 | 1.16 | 0.5  | 0.5  | 5800 | 10000 | 5000 | 28.53 | 0.4951 | 0.5049 | 0.4951 | 0.5049 | 4902 | 9999 | 5098 | 5098 | 9999 | 4902 | 166.22 | 98.46  |
| 20000 | 1.17 | 0.5  | 0.5  | 5850 | 10000 | 5000 | 31.99 | 0.4951 | 0.5049 | 0.4951 | 0.5049 | 4902 | 9999 | 5098 | 5098 | 9999 | 4902 | 185.03 | 112.71 |
| 20000 | 1.18 | 0.5  | 0.5  | 5900 | 10000 | 5000 | 35.62 | 0.4951 | 0.5049 | 0.4951 | 0.5049 | 4902 | 9999 | 5098 | 5098 | 9999 | 4902 | 204.87 | 127.94 |
| 20000 | 1.19 | 0.5  | 0.5  | 5950 | 10000 | 5000 | 39.42 | 0.4951 | 0.5049 | 0.4951 | 0.5049 | 4902 | 9999 | 5098 | 5098 | 9999 | 4902 | 225.73 | 144.16 |
| 20000 | 1.20 | 0.5  | 0.5  | 6000 | 10000 | 5000 | 43.39 | 0.4951 | 0.5049 | 0.4951 | 0.5049 | 4902 | 9999 | 5098 | 5098 | 9999 | 4902 | 247.60 | 161.35 |
| 20000 | 0.80 | 0.55 | 0.45 | 4840 | 9900  | 4050 | 58.12 | 0.5451 | 0.5549 | 0.4451 | 0.4549 | 5943 | 9919 | 4138 | 6158 | 9880 | 3963 | 206.70 | 283.96 |
| 20000 | 0.81 | 0.55 | 0.45 | 4901 | 9900  | 4050 | 51.98 | 0.5451 | 0.5549 | 0.4451 | 0.4549 | 5943 | 9919 | 4138 | 6158 | 9880 | 3963 | 184.86 | 258.66 |
| 20000 | 0.82 | 0.55 | 0.45 | 4961 | 9900  | 4050 | 46.23 | 0.5451 | 0.5549 | 0.4451 | 0.4549 | 5943 | 9919 | 4138 | 6158 | 9880 | 3963 | 164.24 | 234.55 |
| 20000 | 0.83 | 0.55 | 0.45 | 5022 | 9900  | 4050 | 40.87 | 0.5451 | 0.5549 | 0.4451 | 0.4549 | 5943 | 9919 | 4138 | 6158 | 9880 | 3963 | 144.86 | 211.62 |
| 20000 | 0.84 | 0.55 | 0.45 | 5082 | 9900  | 4050 | 35.88 | 0.5451 | 0.5549 | 0.4451 | 0.4549 | 5943 | 9919 | 4138 | 6158 | 9880 | 3963 | 126.71 | 189.89 |
| 20000 | 0.85 | 0.55 | 0.45 | 5143 | 9900  | 4050 | 31.26 | 0.5451 | 0.5549 | 0.4451 | 0.4549 | 5943 | 9919 | 4138 | 6158 | 9880 | 3963 | 109.79 | 169.35 |
| 20000 | 0.86 | 0.55 | 0.45 | 5203 | 9900  | 4050 | 26.99 | 0.5451 | 0.5549 | 0.4451 | 0.4549 | 5943 | 9919 | 4138 | 6158 | 9880 | 3963 | 94.11  | 149.99 |

|       |      |      |      |      |      |      |       |        |        |        |        |      |      |      |      |      |      |        |        |
|-------|------|------|------|------|------|------|-------|--------|--------|--------|--------|------|------|------|------|------|------|--------|--------|
| 20000 | 0.87 | 0.55 | 0.45 | 5264 | 9900 | 4050 | 23.07 | 0.5451 | 0.5549 | 0.4451 | 0.4549 | 5943 | 9919 | 4138 | 6158 | 9880 | 3963 | 79.65  | 131.83 |
| 20000 | 0.88 | 0.55 | 0.45 | 5324 | 9900 | 4050 | 19.49 | 0.5451 | 0.5549 | 0.4451 | 0.4549 | 5943 | 9919 | 4138 | 6158 | 9880 | 3963 | 66.43  | 114.85 |
| 20000 | 0.89 | 0.55 | 0.45 | 5385 | 9900 | 4050 | 16.24 | 0.5451 | 0.5549 | 0.4451 | 0.4549 | 5943 | 9919 | 4138 | 6158 | 9880 | 3963 | 54.44  | 99.06  |
| 20000 | 0.90 | 0.55 | 0.45 | 5445 | 9900 | 4050 | 13.30 | 0.5451 | 0.5549 | 0.4451 | 0.4549 | 5943 | 9919 | 4138 | 6158 | 9880 | 3963 | 43.68  | 84.46  |
| 20000 | 0.91 | 0.55 | 0.45 | 5506 | 9900 | 4050 | 10.68 | 0.5451 | 0.5549 | 0.4451 | 0.4549 | 5943 | 9919 | 4138 | 6158 | 9880 | 3963 | 34.15  | 71.05  |
| 20000 | 0.92 | 0.55 | 0.45 | 5566 | 9900 | 4050 | 8.37  | 0.5451 | 0.5549 | 0.4451 | 0.4549 | 5943 | 9919 | 4138 | 6158 | 9880 | 3963 | 25.86  | 58.83  |
| 20000 | 0.93 | 0.55 | 0.45 | 5627 | 9900 | 4050 | 6.36  | 0.5451 | 0.5549 | 0.4451 | 0.4549 | 5943 | 9919 | 4138 | 6158 | 9880 | 3963 | 18.79  | 47.80  |
| 20000 | 0.94 | 0.55 | 0.45 | 5687 | 9900 | 4050 | 4.63  | 0.5451 | 0.5549 | 0.4451 | 0.4549 | 5943 | 9919 | 4138 | 6158 | 9880 | 3963 | 12.96  | 37.95  |
| 20000 | 0.95 | 0.55 | 0.45 | 5748 | 9900 | 4050 | 3.19  | 0.5451 | 0.5549 | 0.4451 | 0.4549 | 5943 | 9919 | 4138 | 6158 | 9880 | 3963 | 8.36   | 29.30  |
| 20000 | 0.96 | 0.55 | 0.45 | 5808 | 9900 | 4050 | 2.02  | 0.5451 | 0.5549 | 0.4451 | 0.4549 | 5943 | 9919 | 4138 | 6158 | 9880 | 3963 | 4.99   | 21.83  |
| 20000 | 0.97 | 0.55 | 0.45 | 5869 | 9900 | 4050 | 1.13  | 0.5451 | 0.5549 | 0.4451 | 0.4549 | 5943 | 9919 | 4138 | 6158 | 9880 | 3963 | 2.86   | 15.55  |
| 20000 | 0.98 | 0.55 | 0.45 | 5929 | 9900 | 4050 | 0.50  | 0.5451 | 0.5549 | 0.4451 | 0.4549 | 5943 | 9919 | 4138 | 6158 | 9880 | 3963 | 1.95   | 10.46  |
| 20000 | 0.99 | 0.55 | 0.45 | 5990 | 9900 | 4050 | 0.12  | 0.5451 | 0.5549 | 0.4451 | 0.4549 | 5943 | 9919 | 4138 | 6158 | 9880 | 3963 | 2.28   | 6.56   |
| 20000 | 1.00 | 0.55 | 0.45 | 6050 | 9900 | 4050 | 0.00  | 0.5451 | 0.5549 | 0.4451 | 0.4549 | 5943 | 9919 | 4138 | 6158 | 9880 | 3963 | 3.83   | 3.85   |
| 20000 | 1.01 | 0.55 | 0.45 | 6111 | 9900 | 4050 | 0.12  | 0.5451 | 0.5549 | 0.4451 | 0.4549 | 5943 | 9919 | 4138 | 6158 | 9880 | 3963 | 6.62   | 2.33   |
| 20000 | 1.02 | 0.55 | 0.45 | 6171 | 9900 | 4050 | 0.48  | 0.5451 | 0.5549 | 0.4451 | 0.4549 | 5943 | 9919 | 4138 | 6158 | 9880 | 3963 | 10.65  | 1.99   |
| 20000 | 1.03 | 0.55 | 0.45 | 6232 | 9900 | 4050 | 1.08  | 0.5451 | 0.5549 | 0.4451 | 0.4549 | 5943 | 9919 | 4138 | 6158 | 9880 | 3963 | 15.90  | 2.85   |
| 20000 | 1.04 | 0.55 | 0.45 | 6292 | 9900 | 4050 | 1.90  | 0.5451 | 0.5549 | 0.4451 | 0.4549 | 5943 | 9919 | 4138 | 6158 | 9880 | 3963 | 22.38  | 4.89   |
| 20000 | 1.05 | 0.55 | 0.45 | 6353 | 9900 | 4050 | 2.94  | 0.5451 | 0.5549 | 0.4451 | 0.4549 | 5943 | 9919 | 4138 | 6158 | 9880 | 3963 | 30.10  | 8.13   |
| 20000 | 1.06 | 0.55 | 0.45 | 6413 | 9900 | 4050 | 4.21  | 0.5451 | 0.5549 | 0.4451 | 0.4549 | 5943 | 9919 | 4138 | 6158 | 9880 | 3963 | 39.05  | 12.55  |
| 20000 | 1.07 | 0.55 | 0.45 | 6474 | 9900 | 4050 | 5.68  | 0.5451 | 0.5549 | 0.4451 | 0.4549 | 5943 | 9919 | 4138 | 6158 | 9880 | 3963 | 49.23  | 18.16  |
| 20000 | 1.08 | 0.55 | 0.45 | 6534 | 9900 | 4050 | 7.37  | 0.5451 | 0.5549 | 0.4451 | 0.4549 | 5943 | 9919 | 4138 | 6158 | 9880 | 3963 | 60.64  | 24.96  |
| 20000 | 1.09 | 0.55 | 0.45 | 6595 | 9900 | 4050 | 9.25  | 0.5451 | 0.5549 | 0.4451 | 0.4549 | 5943 | 9919 | 4138 | 6158 | 9880 | 3963 | 73.29  | 32.94  |
| 20000 | 1.10 | 0.55 | 0.45 | 6655 | 9900 | 4050 | 11.34 | 0.5451 | 0.5549 | 0.4451 | 0.4549 | 5943 | 9919 | 4138 | 6158 | 9880 | 3963 | 87.16  | 42.12  |
| 20000 | 1.11 | 0.55 | 0.45 | 6716 | 9900 | 4050 | 13.62 | 0.5451 | 0.5549 | 0.4451 | 0.4549 | 5943 | 9919 | 4138 | 6158 | 9880 | 3963 | 102.27 | 52.49  |
| 20000 | 1.12 | 0.55 | 0.45 | 6776 | 9900 | 4050 | 16.09 | 0.5451 | 0.5549 | 0.4451 | 0.4549 | 5943 | 9919 | 4138 | 6158 | 9880 | 3963 | 118.61 | 64.04  |
| 20000 | 1.13 | 0.55 | 0.45 | 6837 | 9900 | 4050 | 18.74 | 0.5451 | 0.5549 | 0.4451 | 0.4549 | 5943 | 9919 | 4138 | 6158 | 9880 | 3963 | 136.18 | 76.78  |
| 20000 | 1.14 | 0.55 | 0.45 | 6897 | 9900 | 4050 | 21.58 | 0.5451 | 0.5549 | 0.4451 | 0.4549 | 5943 | 9919 | 4138 | 6158 | 9880 | 3963 | 154.98 | 90.72  |
| 20000 | 1.15 | 0.55 | 0.45 | 6958 | 9900 | 4050 | 24.59 | 0.5451 | 0.5549 | 0.4451 | 0.4549 | 5943 | 9919 | 4138 | 6158 | 9880 | 3963 | 175.02 | 105.84 |
| 20000 | 1.16 | 0.55 | 0.45 | 7018 | 9900 | 4050 | 27.78 | 0.5451 | 0.5549 | 0.4451 | 0.4549 | 5943 | 9919 | 4138 | 6158 | 9880 | 3963 | 196.28 | 122.15 |
| 20000 | 1.17 | 0.55 | 0.45 | 7079 | 9900 | 4050 | 31.13 | 0.5451 | 0.5549 | 0.4451 | 0.4549 | 5943 | 9919 | 4138 | 6158 | 9880 | 3963 | 218.78 | 139.65 |
| 20000 | 1.18 | 0.55 | 0.45 | 7139 | 9900 | 4050 | 34.65 | 0.5451 | 0.5549 | 0.4451 | 0.4549 | 5943 | 9919 | 4138 | 6158 | 9880 | 3963 | 242.51 | 158.33 |
| 20000 | 1.19 | 0.55 | 0.45 | 7200 | 9900 | 4050 | 38.34 | 0.5451 | 0.5549 | 0.4451 | 0.4549 | 5943 | 9919 | 4138 | 6158 | 9880 | 3963 | 267.47 | 178.21 |
| 20000 | 1.20 | 0.55 | 0.45 | 7260 | 9900 | 4050 | 42.18 | 0.5451 | 0.5549 | 0.4451 | 0.4549 | 5943 | 9919 | 4138 | 6158 | 9880 | 3963 | 293.66 | 199.28 |
| 20000 | 0.80 | 0.6  | 0.4  | 5760 | 9600 | 3200 | 55.22 | 0.5952 | 0.6048 | 0.3952 | 0.4048 | 7085 | 9637 | 3277 | 7316 | 9561 | 3124 | 249.84 | 332.85 |

|       |      |     |     |      |      |      |       |        |        |        |        |      |      |      |      |      |      |        |        |
|-------|------|-----|-----|------|------|------|-------|--------|--------|--------|--------|------|------|------|------|------|------|--------|--------|
| 20000 | 0.81 | 0.6 | 0.4 | 5832 | 9600 | 3200 | 49.35 | 0.5952 | 0.6048 | 0.3952 | 0.4048 | 7085 | 9637 | 3277 | 7316 | 9561 | 3124 | 223.64 | 302.93 |
| 20000 | 0.82 | 0.6 | 0.4 | 5904 | 9600 | 3200 | 43.87 | 0.5952 | 0.6048 | 0.3952 | 0.4048 | 7085 | 9637 | 3277 | 7316 | 9561 | 3124 | 198.90 | 274.44 |
| 20000 | 0.83 | 0.6 | 0.4 | 5976 | 9600 | 3200 | 38.76 | 0.5952 | 0.6048 | 0.3952 | 0.4048 | 7085 | 9637 | 3277 | 7316 | 9561 | 3124 | 175.63 | 247.36 |
| 20000 | 0.84 | 0.6 | 0.4 | 6048 | 9600 | 3200 | 34.01 | 0.5952 | 0.6048 | 0.3952 | 0.4048 | 7085 | 9637 | 3277 | 7316 | 9561 | 3124 | 153.81 | 221.70 |
| 20000 | 0.85 | 0.6 | 0.4 | 6120 | 9600 | 3200 | 29.61 | 0.5952 | 0.6048 | 0.3952 | 0.4048 | 7085 | 9637 | 3277 | 7316 | 9561 | 3124 | 133.46 | 197.45 |
| 20000 | 0.86 | 0.6 | 0.4 | 6192 | 9600 | 3200 | 25.55 | 0.5952 | 0.6048 | 0.3952 | 0.4048 | 7085 | 9637 | 3277 | 7316 | 9561 | 3124 | 114.58 | 174.63 |
| 20000 | 0.87 | 0.6 | 0.4 | 6264 | 9600 | 3200 | 21.83 | 0.5952 | 0.6048 | 0.3952 | 0.4048 | 7085 | 9637 | 3277 | 7316 | 9561 | 3124 | 97.16  | 153.22 |
| 20000 | 0.88 | 0.6 | 0.4 | 6336 | 9600 | 3200 | 18.43 | 0.5952 | 0.6048 | 0.3952 | 0.4048 | 7085 | 9637 | 3277 | 7316 | 9561 | 3124 | 81.20  | 133.22 |
| 20000 | 0.89 | 0.6 | 0.4 | 6408 | 9600 | 3200 | 15.35 | 0.5952 | 0.6048 | 0.3952 | 0.4048 | 7085 | 9637 | 3277 | 7316 | 9561 | 3124 | 66.70  | 114.65 |
| 20000 | 0.90 | 0.6 | 0.4 | 6480 | 9600 | 3200 | 12.57 | 0.5952 | 0.6048 | 0.3952 | 0.4048 | 7085 | 9637 | 3277 | 7316 | 9561 | 3124 | 53.67  | 97.49  |
| 20000 | 0.91 | 0.6 | 0.4 | 6552 | 9600 | 3200 | 10.09 | 0.5952 | 0.6048 | 0.3952 | 0.4048 | 7085 | 9637 | 3277 | 7316 | 9561 | 3124 | 42.10  | 81.75  |
| 20000 | 0.92 | 0.6 | 0.4 | 6624 | 9600 | 3200 | 7.90  | 0.5952 | 0.6048 | 0.3952 | 0.4048 | 7085 | 9637 | 3277 | 7316 | 9561 | 3124 | 31.99  | 67.43  |
| 20000 | 0.93 | 0.6 | 0.4 | 6696 | 9600 | 3200 | 6.00  | 0.5952 | 0.6048 | 0.3952 | 0.4048 | 7085 | 9637 | 3277 | 7316 | 9561 | 3124 | 23.35  | 54.52  |
| 20000 | 0.94 | 0.6 | 0.4 | 6768 | 9600 | 3200 | 4.37  | 0.5952 | 0.6048 | 0.3952 | 0.4048 | 7085 | 9637 | 3277 | 7316 | 9561 | 3124 | 16.17  | 43.03  |
| 20000 | 0.95 | 0.6 | 0.4 | 6840 | 9600 | 3200 | 3.01  | 0.5952 | 0.6048 | 0.3952 | 0.4048 | 7085 | 9637 | 3277 | 7316 | 9561 | 3124 | 10.46  | 32.96  |
| 20000 | 0.96 | 0.6 | 0.4 | 6912 | 9600 | 3200 | 1.91  | 0.5952 | 0.6048 | 0.3952 | 0.4048 | 7085 | 9637 | 3277 | 7316 | 9561 | 3124 | 6.20   | 24.30  |
| 20000 | 0.97 | 0.6 | 0.4 | 6984 | 9600 | 3200 | 1.06  | 0.5952 | 0.6048 | 0.3952 | 0.4048 | 7085 | 9637 | 3277 | 7316 | 9561 | 3124 | 3.41   | 17.07  |
| 20000 | 0.98 | 0.6 | 0.4 | 7056 | 9600 | 3200 | 0.47  | 0.5952 | 0.6048 | 0.3952 | 0.4048 | 7085 | 9637 | 3277 | 7316 | 9561 | 3124 | 2.09   | 11.25  |
| 20000 | 0.99 | 0.6 | 0.4 | 7128 | 9600 | 3200 | 0.12  | 0.5952 | 0.6048 | 0.3952 | 0.4048 | 7085 | 9637 | 3277 | 7316 | 9561 | 3124 | 2.23   | 6.84   |
| 20000 | 1.00 | 0.6 | 0.4 | 7200 | 9600 | 3200 | 0.00  | 0.5952 | 0.6048 | 0.3952 | 0.4048 | 7085 | 9637 | 3277 | 7316 | 9561 | 3124 | 3.83   | 3.86   |
| 20000 | 1.01 | 0.6 | 0.4 | 7272 | 9600 | 3200 | 0.11  | 0.5952 | 0.6048 | 0.3952 | 0.4048 | 7085 | 9637 | 3277 | 7316 | 9561 | 3124 | 6.89   | 2.29   |
| 20000 | 1.02 | 0.6 | 0.4 | 7344 | 9600 | 3200 | 0.45  | 0.5952 | 0.6048 | 0.3952 | 0.4048 | 7085 | 9637 | 3277 | 7316 | 9561 | 3124 | 11.42  | 2.14   |
| 20000 | 1.03 | 0.6 | 0.4 | 7416 | 9600 | 3200 | 1.01  | 0.5952 | 0.6048 | 0.3952 | 0.4048 | 7085 | 9637 | 3277 | 7316 | 9561 | 3124 | 17.41  | 3.40   |
| 20000 | 1.04 | 0.6 | 0.4 | 7488 | 9600 | 3200 | 1.78  | 0.5952 | 0.6048 | 0.3952 | 0.4048 | 7085 | 9637 | 3277 | 7316 | 9561 | 3124 | 24.86  | 6.09   |
| 20000 | 1.05 | 0.6 | 0.4 | 7560 | 9600 | 3200 | 2.76  | 0.5952 | 0.6048 | 0.3952 | 0.4048 | 7085 | 9637 | 3277 | 7316 | 9561 | 3124 | 33.78  | 10.19  |
| 20000 | 1.06 | 0.6 | 0.4 | 7632 | 9600 | 3200 | 3.95  | 0.5952 | 0.6048 | 0.3952 | 0.4048 | 7085 | 9637 | 3277 | 7316 | 9561 | 3124 | 44.16  | 15.71  |
| 20000 | 1.07 | 0.6 | 0.4 | 7704 | 9600 | 3200 | 5.33  | 0.5952 | 0.6048 | 0.3952 | 0.4048 | 7085 | 9637 | 3277 | 7316 | 9561 | 3124 | 56.01  | 22.64  |
| 20000 | 1.08 | 0.6 | 0.4 | 7776 | 9600 | 3200 | 6.91  | 0.5952 | 0.6048 | 0.3952 | 0.4048 | 7085 | 9637 | 3277 | 7316 | 9561 | 3124 | 69.31  | 30.99  |
| 20000 | 1.09 | 0.6 | 0.4 | 7848 | 9600 | 3200 | 8.67  | 0.5952 | 0.6048 | 0.3952 | 0.4048 | 7085 | 9637 | 3277 | 7316 | 9561 | 3124 | 84.08  | 40.76  |
| 20000 | 1.10 | 0.6 | 0.4 | 7920 | 9600 | 3200 | 10.62 | 0.5952 | 0.6048 | 0.3952 | 0.4048 | 7085 | 9637 | 3277 | 7316 | 9561 | 3124 | 100.32 | 51.95  |
| 20000 | 1.11 | 0.6 | 0.4 | 7992 | 9600 | 3200 | 12.75 | 0.5952 | 0.6048 | 0.3952 | 0.4048 | 7085 | 9637 | 3277 | 7316 | 9561 | 3124 | 118.01 | 64.55  |
| 20000 | 1.12 | 0.6 | 0.4 | 8064 | 9600 | 3200 | 15.06 | 0.5952 | 0.6048 | 0.3952 | 0.4048 | 7085 | 9637 | 3277 | 7316 | 9561 | 3124 | 137.18 | 78.57  |
| 20000 | 1.13 | 0.6 | 0.4 | 8136 | 9600 | 3200 | 17.54 | 0.5952 | 0.6048 | 0.3952 | 0.4048 | 7085 | 9637 | 3277 | 7316 | 9561 | 3124 | 157.80 | 94.01  |
| 20000 | 1.14 | 0.6 | 0.4 | 8208 | 9600 | 3200 | 20.18 | 0.5952 | 0.6048 | 0.3952 | 0.4048 | 7085 | 9637 | 3277 | 7316 | 9561 | 3124 | 179.89 | 110.87 |
| 20000 | 1.15 | 0.6 | 0.4 | 8280 | 9600 | 3200 | 22.99 | 0.5952 | 0.6048 | 0.3952 | 0.4048 | 7085 | 9637 | 3277 | 7316 | 9561 | 3124 | 203.44 | 129.14 |

|       |      |      |      |      |      |      |       |        |        |        |        |      |      |      |      |      |      |        |        |
|-------|------|------|------|------|------|------|-------|--------|--------|--------|--------|------|------|------|------|------|------|--------|--------|
| 20000 | 1.16 | 0.6  | 0.4  | 8352 | 9600 | 3200 | 25.97 | 0.5952 | 0.6048 | 0.3952 | 0.4048 | 7085 | 9637 | 3277 | 7316 | 9561 | 3124 | 228.45 | 148.83 |
| 20000 | 1.17 | 0.6  | 0.4  | 8424 | 9600 | 3200 | 29.09 | 0.5952 | 0.6048 | 0.3952 | 0.4048 | 7085 | 9637 | 3277 | 7316 | 9561 | 3124 | 254.93 | 169.94 |
| 20000 | 1.18 | 0.6  | 0.4  | 8496 | 9600 | 3200 | 32.37 | 0.5952 | 0.6048 | 0.3952 | 0.4048 | 7085 | 9637 | 3277 | 7316 | 9561 | 3124 | 282.87 | 192.46 |
| 20000 | 1.19 | 0.6  | 0.4  | 8568 | 9600 | 3200 | 35.80 | 0.5952 | 0.6048 | 0.3952 | 0.4048 | 7085 | 9637 | 3277 | 7316 | 9561 | 3124 | 312.27 | 216.40 |
| 20000 | 1.20 | 0.6  | 0.4  | 8640 | 9600 | 3200 | 39.38 | 0.5952 | 0.6048 | 0.3952 | 0.4048 | 7085 | 9637 | 3277 | 7316 | 9561 | 3124 | 343.14 | 241.76 |
| 20000 | 0.80 | 0.65 | 0.35 | 6760 | 9100 | 2450 | 50.08 | 0.6453 | 0.6547 | 0.3453 | 0.3547 | 8329 | 9155 | 2516 | 8572 | 9043 | 2385 | 297.59 | 385.15 |
| 20000 | 0.81 | 0.65 | 0.35 | 6845 | 9100 | 2450 | 44.74 | 0.6453 | 0.6547 | 0.3453 | 0.3547 | 8329 | 9155 | 2516 | 8572 | 9043 | 2385 | 266.61 | 350.26 |
| 20000 | 0.82 | 0.65 | 0.35 | 6929 | 9100 | 2450 | 39.74 | 0.6453 | 0.6547 | 0.3453 | 0.3547 | 8329 | 9155 | 2516 | 8572 | 9043 | 2385 | 237.35 | 317.03 |
| 20000 | 0.83 | 0.65 | 0.35 | 7014 | 9100 | 2450 | 35.09 | 0.6453 | 0.6547 | 0.3453 | 0.3547 | 8329 | 9155 | 2516 | 8572 | 9043 | 2385 | 209.80 | 285.48 |
| 20000 | 0.84 | 0.65 | 0.35 | 7098 | 9100 | 2450 | 30.78 | 0.6453 | 0.6547 | 0.3453 | 0.3547 | 8329 | 9155 | 2516 | 8572 | 9043 | 2385 | 183.97 | 255.58 |
| 20000 | 0.85 | 0.65 | 0.35 | 7183 | 9100 | 2450 | 26.78 | 0.6453 | 0.6547 | 0.3453 | 0.3547 | 8329 | 9155 | 2516 | 8572 | 9043 | 2385 | 159.85 | 227.36 |
| 20000 | 0.86 | 0.65 | 0.35 | 7267 | 9100 | 2450 | 23.10 | 0.6453 | 0.6547 | 0.3453 | 0.3547 | 8329 | 9155 | 2516 | 8572 | 9043 | 2385 | 137.45 | 200.79 |
| 20000 | 0.87 | 0.65 | 0.35 | 7352 | 9100 | 2450 | 19.73 | 0.6453 | 0.6547 | 0.3453 | 0.3547 | 8329 | 9155 | 2516 | 8572 | 9043 | 2385 | 116.76 | 175.90 |
| 20000 | 0.88 | 0.65 | 0.35 | 7436 | 9100 | 2450 | 16.65 | 0.6453 | 0.6547 | 0.3453 | 0.3547 | 8329 | 9155 | 2516 | 8572 | 9043 | 2385 | 97.78  | 152.67 |
| 20000 | 0.89 | 0.65 | 0.35 | 7521 | 9100 | 2450 | 13.85 | 0.6453 | 0.6547 | 0.3453 | 0.3547 | 8329 | 9155 | 2516 | 8572 | 9043 | 2385 | 80.52  | 131.11 |
| 20000 | 0.90 | 0.65 | 0.35 | 7605 | 9100 | 2450 | 11.34 | 0.6453 | 0.6547 | 0.3453 | 0.3547 | 8329 | 9155 | 2516 | 8572 | 9043 | 2385 | 64.98  | 111.21 |
| 20000 | 0.91 | 0.65 | 0.35 | 7690 | 9100 | 2450 | 9.10  | 0.6453 | 0.6547 | 0.3453 | 0.3547 | 8329 | 9155 | 2516 | 8572 | 9043 | 2385 | 51.14  | 92.98  |
| 20000 | 0.92 | 0.65 | 0.35 | 7774 | 9100 | 2450 | 7.12  | 0.6453 | 0.6547 | 0.3453 | 0.3547 | 8329 | 9155 | 2516 | 8572 | 9043 | 2385 | 39.03  | 76.41  |
| 20000 | 0.93 | 0.65 | 0.35 | 7859 | 9100 | 2450 | 5.40  | 0.6453 | 0.6547 | 0.3453 | 0.3547 | 8329 | 9155 | 2516 | 8572 | 9043 | 2385 | 28.63  | 61.51  |
| 20000 | 0.94 | 0.65 | 0.35 | 7943 | 9100 | 2450 | 3.93  | 0.6453 | 0.6547 | 0.3453 | 0.3547 | 8329 | 9155 | 2516 | 8572 | 9043 | 2385 | 19.94  | 48.28  |
| 20000 | 0.95 | 0.65 | 0.35 | 8028 | 9100 | 2450 | 2.71  | 0.6453 | 0.6547 | 0.3453 | 0.3547 | 8329 | 9155 | 2516 | 8572 | 9043 | 2385 | 12.97  | 36.71  |
| 20000 | 0.96 | 0.65 | 0.35 | 8112 | 9100 | 2450 | 1.72  | 0.6453 | 0.6547 | 0.3453 | 0.3547 | 8329 | 9155 | 2516 | 8572 | 9043 | 2385 | 7.71   | 26.81  |
| 20000 | 0.97 | 0.65 | 0.35 | 8197 | 9100 | 2450 | 0.96  | 0.6453 | 0.6547 | 0.3453 | 0.3547 | 8329 | 9155 | 2516 | 8572 | 9043 | 2385 | 4.16   | 18.58  |
| 20000 | 0.98 | 0.65 | 0.35 | 8281 | 9100 | 2450 | 0.42  | 0.6453 | 0.6547 | 0.3453 | 0.3547 | 8329 | 9155 | 2516 | 8572 | 9043 | 2385 | 2.33   | 12.01  |
| 20000 | 0.99 | 0.65 | 0.35 | 8366 | 9100 | 2450 | 0.10  | 0.6453 | 0.6547 | 0.3453 | 0.3547 | 8329 | 9155 | 2516 | 8572 | 9043 | 2385 | 2.22   | 7.10   |
| 20000 | 1.00 | 0.65 | 0.35 | 8450 | 9100 | 2450 | 0.00  | 0.6453 | 0.6547 | 0.3453 | 0.3547 | 8329 | 9155 | 2516 | 8572 | 9043 | 2385 | 3.82   | 3.87   |
| 20000 | 1.01 | 0.65 | 0.35 | 8535 | 9100 | 2450 | 0.10  | 0.6453 | 0.6547 | 0.3453 | 0.3547 | 8329 | 9155 | 2516 | 8572 | 9043 | 2385 | 7.13   | 2.29   |
| 20000 | 1.02 | 0.65 | 0.35 | 8619 | 9100 | 2450 | 0.41  | 0.6453 | 0.6547 | 0.3453 | 0.3547 | 8329 | 9155 | 2516 | 8572 | 9043 | 2385 | 12.16  | 2.39   |
| 20000 | 1.03 | 0.65 | 0.35 | 8704 | 9100 | 2450 | 0.91  | 0.6453 | 0.6547 | 0.3453 | 0.3547 | 8329 | 9155 | 2516 | 8572 | 9043 | 2385 | 18.91  | 4.15   |
| 20000 | 1.04 | 0.65 | 0.35 | 8788 | 9100 | 2450 | 1.60  | 0.6453 | 0.6547 | 0.3453 | 0.3547 | 8329 | 9155 | 2516 | 8572 | 9043 | 2385 | 27.36  | 7.57   |
| 20000 | 1.05 | 0.65 | 0.35 | 8873 | 9100 | 2450 | 2.48  | 0.6453 | 0.6547 | 0.3453 | 0.3547 | 8329 | 9155 | 2516 | 8572 | 9043 | 2385 | 37.54  | 12.67  |
| 20000 | 1.06 | 0.65 | 0.35 | 8957 | 9100 | 2450 | 3.54  | 0.6453 | 0.6547 | 0.3453 | 0.3547 | 8329 | 9155 | 2516 | 8572 | 9043 | 2385 | 49.42  | 19.43  |
| 20000 | 1.07 | 0.65 | 0.35 | 9042 | 9100 | 2450 | 4.78  | 0.6453 | 0.6547 | 0.3453 | 0.3547 | 8329 | 9155 | 2516 | 8572 | 9043 | 2385 | 63.03  | 27.85  |
| 20000 | 1.08 | 0.65 | 0.35 | 9126 | 9100 | 2450 | 6.19  | 0.6453 | 0.6547 | 0.3453 | 0.3547 | 8329 | 9155 | 2516 | 8572 | 9043 | 2385 | 78.34  | 37.94  |
| 20000 | 1.09 | 0.65 | 0.35 | 9211 | 9100 | 2450 | 7.77  | 0.6453 | 0.6547 | 0.3453 | 0.3547 | 8329 | 9155 | 2516 | 8572 | 9043 | 2385 | 95.37  | 49.70  |

|       |      |      |      |       |      |      |       |        |        |        |        |      |      |      |      |      |      |        |        |
|-------|------|------|------|-------|------|------|-------|--------|--------|--------|--------|------|------|------|------|------|------|--------|--------|
| 20000 | 1.10 | 0.65 | 0.35 | 9295  | 9100 | 2450 | 9.51  | 0.6453 | 0.6547 | 0.3453 | 0.3547 | 8329 | 9155 | 2516 | 8572 | 9043 | 2385 | 114.12 | 63.12  |
| 20000 | 1.11 | 0.65 | 0.35 | 9380  | 9100 | 2450 | 11.42 | 0.6453 | 0.6547 | 0.3453 | 0.3547 | 8329 | 9155 | 2516 | 8572 | 9043 | 2385 | 134.58 | 78.20  |
| 20000 | 1.12 | 0.65 | 0.35 | 9464  | 9100 | 2450 | 13.48 | 0.6453 | 0.6547 | 0.3453 | 0.3547 | 8329 | 9155 | 2516 | 8572 | 9043 | 2385 | 156.75 | 94.96  |
| 20000 | 1.13 | 0.65 | 0.35 | 9549  | 9100 | 2450 | 15.69 | 0.6453 | 0.6547 | 0.3453 | 0.3547 | 8329 | 9155 | 2516 | 8572 | 9043 | 2385 | 180.64 | 113.38 |
| 20000 | 1.14 | 0.65 | 0.35 | 9633  | 9100 | 2450 | 18.05 | 0.6453 | 0.6547 | 0.3453 | 0.3547 | 8329 | 9155 | 2516 | 8572 | 9043 | 2385 | 206.25 | 133.46 |
| 20000 | 1.15 | 0.65 | 0.35 | 9718  | 9100 | 2450 | 20.56 | 0.6453 | 0.6547 | 0.3453 | 0.3547 | 8329 | 9155 | 2516 | 8572 | 9043 | 2385 | 233.56 | 155.22 |
| 20000 | 1.16 | 0.65 | 0.35 | 9802  | 9100 | 2450 | 23.21 | 0.6453 | 0.6547 | 0.3453 | 0.3547 | 8329 | 9155 | 2516 | 8572 | 9043 | 2385 | 262.60 | 178.63 |
| 20000 | 1.17 | 0.65 | 0.35 | 9887  | 9100 | 2450 | 26.00 | 0.6453 | 0.6547 | 0.3453 | 0.3547 | 8329 | 9155 | 2516 | 8572 | 9043 | 2385 | 293.35 | 203.72 |
| 20000 | 1.18 | 0.65 | 0.35 | 9971  | 9100 | 2450 | 28.92 | 0.6453 | 0.6547 | 0.3453 | 0.3547 | 8329 | 9155 | 2516 | 8572 | 9043 | 2385 | 325.81 | 230.47 |
| 20000 | 1.19 | 0.65 | 0.35 | 10056 | 9100 | 2450 | 31.98 | 0.6453 | 0.6547 | 0.3453 | 0.3547 | 8329 | 9155 | 2516 | 8572 | 9043 | 2385 | 359.98 | 258.88 |
| 20000 | 1.20 | 0.65 | 0.35 | 10140 | 9100 | 2450 | 35.17 | 0.6453 | 0.6547 | 0.3453 | 0.3547 | 8329 | 9155 | 2516 | 8572 | 9043 | 2385 | 395.88 | 288.96 |
| 20000 | 0.80 | 0.7  | 0.3  | 7840  | 8400 | 1800 | 43.03 | 0.6955 | 0.7045 | 0.2955 | 0.3045 | 9675 | 8471 | 1854 | 9926 | 8327 | 1747 | 350.10 | 440.71 |
| 20000 | 0.81 | 0.7  | 0.3  | 7938  | 8400 | 1800 | 38.41 | 0.6955 | 0.7045 | 0.2955 | 0.3045 | 9675 | 8471 | 1854 | 9926 | 8327 | 1747 | 313.93 | 400.49 |
| 20000 | 0.82 | 0.7  | 0.3  | 8036  | 8400 | 1800 | 34.11 | 0.6955 | 0.7045 | 0.2955 | 0.3045 | 9675 | 8471 | 1854 | 9926 | 8327 | 1747 | 279.74 | 362.20 |
| 20000 | 0.83 | 0.7  | 0.3  | 8134  | 8400 | 1800 | 30.11 | 0.6955 | 0.7045 | 0.2955 | 0.3045 | 9675 | 8471 | 1854 | 9926 | 8327 | 1747 | 247.53 | 325.84 |
| 20000 | 0.84 | 0.7  | 0.3  | 8232  | 8400 | 1800 | 26.39 | 0.6955 | 0.7045 | 0.2955 | 0.3045 | 9675 | 8471 | 1854 | 9926 | 8327 | 1747 | 217.31 | 291.42 |
| 20000 | 0.85 | 0.7  | 0.3  | 8330  | 8400 | 1800 | 22.95 | 0.6955 | 0.7045 | 0.2955 | 0.3045 | 9675 | 8471 | 1854 | 9926 | 8327 | 1747 | 189.08 | 258.94 |
| 20000 | 0.86 | 0.7  | 0.3  | 8428  | 8400 | 1800 | 19.79 | 0.6955 | 0.7045 | 0.2955 | 0.3045 | 9675 | 8471 | 1854 | 9926 | 8327 | 1747 | 162.83 | 228.39 |
| 20000 | 0.87 | 0.7  | 0.3  | 8526  | 8400 | 1800 | 16.89 | 0.6955 | 0.7045 | 0.2955 | 0.3045 | 9675 | 8471 | 1854 | 9926 | 8327 | 1747 | 138.56 | 199.77 |
| 20000 | 0.88 | 0.7  | 0.3  | 8624  | 8400 | 1800 | 14.25 | 0.6955 | 0.7045 | 0.2955 | 0.3045 | 9675 | 8471 | 1854 | 9926 | 8327 | 1747 | 116.29 | 173.09 |
| 20000 | 0.89 | 0.7  | 0.3  | 8722  | 8400 | 1800 | 11.85 | 0.6955 | 0.7045 | 0.2955 | 0.3045 | 9675 | 8471 | 1854 | 9926 | 8327 | 1747 | 95.99  | 148.35 |
| 20000 | 0.90 | 0.7  | 0.3  | 8820  | 8400 | 1800 | 9.70  | 0.6955 | 0.7045 | 0.2955 | 0.3045 | 9675 | 8471 | 1854 | 9926 | 8327 | 1747 | 77.69  | 125.54 |
| 20000 | 0.91 | 0.7  | 0.3  | 8918  | 8400 | 1800 | 7.78  | 0.6955 | 0.7045 | 0.2955 | 0.3045 | 9675 | 8471 | 1854 | 9926 | 8327 | 1747 | 61.36  | 104.66 |
| 20000 | 0.92 | 0.7  | 0.3  | 9016  | 8400 | 1800 | 6.09  | 0.6955 | 0.7045 | 0.2955 | 0.3045 | 9675 | 8471 | 1854 | 9926 | 8327 | 1747 | 47.03  | 85.73  |
| 20000 | 0.93 | 0.7  | 0.3  | 9114  | 8400 | 1800 | 4.61  | 0.6955 | 0.7045 | 0.2955 | 0.3045 | 9675 | 8471 | 1854 | 9926 | 8327 | 1747 | 34.68  | 68.72  |
| 20000 | 0.94 | 0.7  | 0.3  | 9212  | 8400 | 1800 | 3.36  | 0.6955 | 0.7045 | 0.2955 | 0.3045 | 9675 | 8471 | 1854 | 9926 | 8327 | 1747 | 24.31  | 53.65  |
| 20000 | 0.95 | 0.7  | 0.3  | 9310  | 8400 | 1800 | 2.31  | 0.6955 | 0.7045 | 0.2955 | 0.3045 | 9675 | 8471 | 1854 | 9926 | 8327 | 1747 | 15.93  | 40.52  |
| 20000 | 0.96 | 0.7  | 0.3  | 9408  | 8400 | 1800 | 1.46  | 0.6955 | 0.7045 | 0.2955 | 0.3045 | 9675 | 8471 | 1854 | 9926 | 8327 | 1747 | 9.54   | 29.32  |
| 20000 | 0.97 | 0.7  | 0.3  | 9506  | 8400 | 1800 | 0.82  | 0.6955 | 0.7045 | 0.2955 | 0.3045 | 9675 | 8471 | 1854 | 9926 | 8327 | 1747 | 5.13   | 20.06  |
| 20000 | 0.98 | 0.7  | 0.3  | 9604  | 8400 | 1800 | 0.36  | 0.6955 | 0.7045 | 0.2955 | 0.3045 | 9675 | 8471 | 1854 | 9926 | 8327 | 1747 | 2.70   | 12.73  |
| 20000 | 0.99 | 0.7  | 0.3  | 9702  | 8400 | 1800 | 0.09  | 0.6955 | 0.7045 | 0.2955 | 0.3045 | 9675 | 8471 | 1854 | 9926 | 8327 | 1747 | 2.26   | 7.33   |
| 20000 | 1.00 | 0.7  | 0.3  | 9800  | 8400 | 1800 | 0.00  | 0.6955 | 0.7045 | 0.2955 | 0.3045 | 9675 | 8471 | 1854 | 9926 | 8327 | 1747 | 3.81   | 3.88   |
| 20000 | 1.01 | 0.7  | 0.3  | 9898  | 8400 | 1800 | 0.09  | 0.6955 | 0.7045 | 0.2955 | 0.3045 | 9675 | 8471 | 1854 | 9926 | 8327 | 1747 | 7.34   | 2.35   |
| 20000 | 1.02 | 0.7  | 0.3  | 9996  | 8400 | 1800 | 0.35  | 0.6955 | 0.7045 | 0.2955 | 0.3045 | 9675 | 8471 | 1854 | 9926 | 8327 | 1747 | 12.86  | 2.76   |
| 20000 | 1.03 | 0.7  | 0.3  | 10094 | 8400 | 1800 | 0.77  | 0.6955 | 0.7045 | 0.2955 | 0.3045 | 9675 | 8471 | 1854 | 9926 | 8327 | 1747 | 20.36  | 5.11   |

|       |      |      |      |       |      |      |       |        |        |        |        |       |      |      |       |      |      |        |        |
|-------|------|------|------|-------|------|------|-------|--------|--------|--------|--------|-------|------|------|-------|------|------|--------|--------|
| 20000 | 1.04 | 0.7  | 0.3  | 10192 | 8400 | 1800 | 1.36  | 0.6955 | 0.7045 | 0.2955 | 0.3045 | 9675  | 8471 | 1854 | 9926  | 8327 | 1747 | 29.85  | 9.39   |
| 20000 | 1.05 | 0.7  | 0.3  | 10290 | 8400 | 1800 | 2.11  | 0.6955 | 0.7045 | 0.2955 | 0.3045 | 9675  | 8471 | 1854 | 9926  | 8327 | 1747 | 41.32  | 15.61  |
| 20000 | 1.06 | 0.7  | 0.3  | 10388 | 8400 | 1800 | 3.01  | 0.6955 | 0.7045 | 0.2955 | 0.3045 | 9675  | 8471 | 1854 | 9926  | 8327 | 1747 | 54.78  | 23.76  |
| 20000 | 1.07 | 0.7  | 0.3  | 10486 | 8400 | 1800 | 4.06  | 0.6955 | 0.7045 | 0.2955 | 0.3045 | 9675  | 8471 | 1854 | 9926  | 8327 | 1747 | 70.23  | 33.85  |
| 20000 | 1.08 | 0.7  | 0.3  | 10584 | 8400 | 1800 | 5.26  | 0.6955 | 0.7045 | 0.2955 | 0.3045 | 9675  | 8471 | 1854 | 9926  | 8327 | 1747 | 87.66  | 45.87  |
| 20000 | 1.09 | 0.7  | 0.3  | 10682 | 8400 | 1800 | 6.60  | 0.6955 | 0.7045 | 0.2955 | 0.3045 | 9675  | 8471 | 1854 | 9926  | 8327 | 1747 | 107.07 | 59.83  |
| 20000 | 1.10 | 0.7  | 0.3  | 10780 | 8400 | 1800 | 8.08  | 0.6955 | 0.7045 | 0.2955 | 0.3045 | 9675  | 8471 | 1854 | 9926  | 8327 | 1747 | 128.47 | 75.72  |
| 20000 | 1.11 | 0.7  | 0.3  | 10878 | 8400 | 1800 | 9.70  | 0.6955 | 0.7045 | 0.2955 | 0.3045 | 9675  | 8471 | 1854 | 9926  | 8327 | 1747 | 151.86 | 93.55  |
| 20000 | 1.12 | 0.7  | 0.3  | 10976 | 8400 | 1800 | 11.44 | 0.6955 | 0.7045 | 0.2955 | 0.3045 | 9675  | 8471 | 1854 | 9926  | 8327 | 1747 | 177.23 | 113.31 |
| 20000 | 1.13 | 0.7  | 0.3  | 11074 | 8400 | 1800 | 13.32 | 0.6955 | 0.7045 | 0.2955 | 0.3045 | 9675  | 8471 | 1854 | 9926  | 8327 | 1747 | 204.59 | 135.01 |
| 20000 | 1.14 | 0.7  | 0.3  | 11172 | 8400 | 1800 | 15.32 | 0.6955 | 0.7045 | 0.2955 | 0.3045 | 9675  | 8471 | 1854 | 9926  | 8327 | 1747 | 233.93 | 158.64 |
| 20000 | 1.15 | 0.7  | 0.3  | 11270 | 8400 | 1800 | 17.45 | 0.6955 | 0.7045 | 0.2955 | 0.3045 | 9675  | 8471 | 1854 | 9926  | 8327 | 1747 | 265.26 | 184.21 |
| 20000 | 1.16 | 0.7  | 0.3  | 11368 | 8400 | 1800 | 19.69 | 0.6955 | 0.7045 | 0.2955 | 0.3045 | 9675  | 8471 | 1854 | 9926  | 8327 | 1747 | 298.57 | 211.71 |
| 20000 | 1.17 | 0.7  | 0.3  | 11466 | 8400 | 1800 | 22.05 | 0.6955 | 0.7045 | 0.2955 | 0.3045 | 9675  | 8471 | 1854 | 9926  | 8327 | 1747 | 333.87 | 241.15 |
| 20000 | 1.18 | 0.7  | 0.3  | 11564 | 8400 | 1800 | 24.53 | 0.6955 | 0.7045 | 0.2955 | 0.3045 | 9675  | 8471 | 1854 | 9926  | 8327 | 1747 | 371.15 | 272.52 |
| 20000 | 1.19 | 0.7  | 0.3  | 11662 | 8400 | 1800 | 27.11 | 0.6955 | 0.7045 | 0.2955 | 0.3045 | 9675  | 8471 | 1854 | 9926  | 8327 | 1747 | 410.42 | 305.83 |
| 20000 | 1.20 | 0.7  | 0.3  | 11760 | 8400 | 1800 | 29.81 | 0.6955 | 0.7045 | 0.2955 | 0.3045 | 9675  | 8471 | 1854 | 9926  | 8327 | 1747 | 451.67 | 341.08 |
| 20000 | 0.80 | 0.75 | 0.25 | 9000  | 7500 | 1250 | 34.55 | 0.7458 | 0.7542 | 0.2458 | 0.2542 | 11123 | 7584 | 1293 | 11378 | 7414 | 1208 | 407.58 | 499.33 |
| 20000 | 0.81 | 0.75 | 0.25 | 9113  | 7500 | 1250 | 30.83 | 0.7458 | 0.7542 | 0.2458 | 0.2542 | 11123 | 7584 | 1293 | 11378 | 7414 | 1208 | 365.77 | 453.42 |
| 20000 | 0.82 | 0.75 | 0.25 | 9225  | 7500 | 1250 | 27.36 | 0.7458 | 0.7542 | 0.2458 | 0.2542 | 11123 | 7584 | 1293 | 11378 | 7414 | 1208 | 326.24 | 409.74 |
| 20000 | 0.83 | 0.75 | 0.25 | 9338  | 7500 | 1250 | 24.14 | 0.7458 | 0.7542 | 0.2458 | 0.2542 | 11123 | 7584 | 1293 | 11378 | 7414 | 1208 | 288.98 | 368.28 |
| 20000 | 0.84 | 0.75 | 0.25 | 9450  | 7500 | 1250 | 21.15 | 0.7458 | 0.7542 | 0.2458 | 0.2542 | 11123 | 7584 | 1293 | 11378 | 7414 | 1208 | 254.00 | 329.05 |
| 20000 | 0.85 | 0.75 | 0.25 | 9563  | 7500 | 1250 | 18.39 | 0.7458 | 0.7542 | 0.2458 | 0.2542 | 11123 | 7584 | 1293 | 11378 | 7414 | 1208 | 221.29 | 292.04 |
| 20000 | 0.86 | 0.75 | 0.25 | 9675  | 7500 | 1250 | 15.85 | 0.7458 | 0.7542 | 0.2458 | 0.2542 | 11123 | 7584 | 1293 | 11378 | 7414 | 1208 | 190.87 | 257.26 |
| 20000 | 0.87 | 0.75 | 0.25 | 9788  | 7500 | 1250 | 13.52 | 0.7458 | 0.7542 | 0.2458 | 0.2542 | 11123 | 7584 | 1293 | 11378 | 7414 | 1208 | 162.71 | 224.70 |
| 20000 | 0.88 | 0.75 | 0.25 | 9900  | 7500 | 1250 | 11.40 | 0.7458 | 0.7542 | 0.2458 | 0.2542 | 11123 | 7584 | 1293 | 11378 | 7414 | 1208 | 136.83 | 194.36 |
| 20000 | 0.89 | 0.75 | 0.25 | 10013 | 7500 | 1250 | 9.48  | 0.7458 | 0.7542 | 0.2458 | 0.2542 | 11123 | 7584 | 1293 | 11378 | 7414 | 1208 | 113.23 | 166.26 |
| 20000 | 0.90 | 0.75 | 0.25 | 10125 | 7500 | 1250 | 7.76  | 0.7458 | 0.7542 | 0.2458 | 0.2542 | 11123 | 7584 | 1293 | 11378 | 7414 | 1208 | 91.90  | 140.37 |
| 20000 | 0.91 | 0.75 | 0.25 | 10238 | 7500 | 1250 | 6.22  | 0.7458 | 0.7542 | 0.2458 | 0.2542 | 11123 | 7584 | 1293 | 11378 | 7414 | 1208 | 72.85  | 116.71 |
| 20000 | 0.92 | 0.75 | 0.25 | 10350 | 7500 | 1250 | 4.86  | 0.7458 | 0.7542 | 0.2458 | 0.2542 | 11123 | 7584 | 1293 | 11378 | 7414 | 1208 | 56.08  | 95.28  |
| 20000 | 0.93 | 0.75 | 0.25 | 10463 | 7500 | 1250 | 3.69  | 0.7458 | 0.7542 | 0.2458 | 0.2542 | 11123 | 7584 | 1293 | 11378 | 7414 | 1208 | 41.58  | 76.07  |
| 20000 | 0.94 | 0.75 | 0.25 | 10575 | 7500 | 1250 | 2.68  | 0.7458 | 0.7542 | 0.2458 | 0.2542 | 11123 | 7584 | 1293 | 11378 | 7414 | 1208 | 29.35  | 59.08  |
| 20000 | 0.95 | 0.75 | 0.25 | 10688 | 7500 | 1250 | 1.84  | 0.7458 | 0.7542 | 0.2458 | 0.2542 | 11123 | 7584 | 1293 | 11378 | 7414 | 1208 | 19.41  | 44.32  |
| 20000 | 0.96 | 0.75 | 0.25 | 10800 | 7500 | 1250 | 1.17  | 0.7458 | 0.7542 | 0.2458 | 0.2542 | 11123 | 7584 | 1293 | 11378 | 7414 | 1208 | 11.73  | 31.78  |
| 20000 | 0.97 | 0.75 | 0.25 | 10913 | 7500 | 1250 | 0.65  | 0.7458 | 0.7542 | 0.2458 | 0.2542 | 11123 | 7584 | 1293 | 11378 | 7414 | 1208 | 6.34   | 21.47  |



|       |      |      |      |       |      |      |       |        |        |        |        |       |      |      |       |      |      |        |        |
|-------|------|------|------|-------|------|------|-------|--------|--------|--------|--------|-------|------|------|-------|------|------|--------|--------|
| 20000 | 0.98 | 0.75 | 0.25 | 11025 | 7500 | 1250 | 0.29  | 0.7458 | 0.7542 | 0.2458 | 0.2542 | 11123 | 7584 | 1293 | 11378 | 7414 | 1208 | 3.21   | 13.38  |
| 20000 | 0.99 | 0.75 | 0.25 | 11138 | 7500 | 1250 | 0.07  | 0.7458 | 0.7542 | 0.2458 | 0.2542 | 11123 | 7584 | 1293 | 11378 | 7414 | 1208 | 2.37   | 7.52   |
| 20000 | 1.00 | 0.75 | 0.25 | 11250 | 7500 | 1250 | 0.00  | 0.7458 | 0.7542 | 0.2458 | 0.2542 | 11123 | 7584 | 1293 | 11378 | 7414 | 1208 | 3.80   | 3.89   |
| 20000 | 1.01 | 0.75 | 0.25 | 11363 | 7500 | 1250 | 0.07  | 0.7458 | 0.7542 | 0.2458 | 0.2542 | 11123 | 7584 | 1293 | 11378 | 7414 | 1208 | 7.50   | 2.47   |
| 20000 | 1.02 | 0.75 | 0.25 | 11475 | 7500 | 1250 | 0.28  | 0.7458 | 0.7542 | 0.2458 | 0.2542 | 11123 | 7584 | 1293 | 11378 | 7414 | 1208 | 13.49  | 3.29   |
| 20000 | 1.03 | 0.75 | 0.25 | 11588 | 7500 | 1250 | 0.62  | 0.7458 | 0.7542 | 0.2458 | 0.2542 | 11123 | 7584 | 1293 | 11378 | 7414 | 1208 | 21.74  | 6.32   |
| 20000 | 1.04 | 0.75 | 0.25 | 11700 | 7500 | 1250 | 1.08  | 0.7458 | 0.7542 | 0.2458 | 0.2542 | 11123 | 7584 | 1293 | 11378 | 7414 | 1208 | 32.28  | 11.59  |
| 20000 | 1.05 | 0.75 | 0.25 | 11813 | 7500 | 1250 | 1.68  | 0.7458 | 0.7542 | 0.2458 | 0.2542 | 11123 | 7584 | 1293 | 11378 | 7414 | 1208 | 45.08  | 19.07  |
| 20000 | 1.06 | 0.75 | 0.25 | 11925 | 7500 | 1250 | 2.40  | 0.7458 | 0.7542 | 0.2458 | 0.2542 | 11123 | 7584 | 1293 | 11378 | 7414 | 1208 | 60.17  | 28.78  |
| 20000 | 1.07 | 0.75 | 0.25 | 12038 | 7500 | 1250 | 3.23  | 0.7458 | 0.7542 | 0.2458 | 0.2542 | 11123 | 7584 | 1293 | 11378 | 7414 | 1208 | 77.53  | 40.72  |
| 20000 | 1.08 | 0.75 | 0.25 | 12150 | 7500 | 1250 | 4.19  | 0.7458 | 0.7542 | 0.2458 | 0.2542 | 11123 | 7584 | 1293 | 11378 | 7414 | 1208 | 97.16  | 54.88  |
| 20000 | 1.09 | 0.75 | 0.25 | 12263 | 7500 | 1250 | 5.25  | 0.7458 | 0.7542 | 0.2458 | 0.2542 | 11123 | 7584 | 1293 | 11378 | 7414 | 1208 | 119.08 | 71.27  |
| 20000 | 1.10 | 0.75 | 0.25 | 12375 | 7500 | 1250 | 6.43  | 0.7458 | 0.7542 | 0.2458 | 0.2542 | 11123 | 7584 | 1293 | 11378 | 7414 | 1208 | 143.26 | 89.88  |
| 20000 | 1.11 | 0.75 | 0.25 | 12488 | 7500 | 1250 | 7.71  | 0.7458 | 0.7542 | 0.2458 | 0.2542 | 11123 | 7584 | 1293 | 11378 | 7414 | 1208 | 169.72 | 110.71 |
| 20000 | 1.12 | 0.75 | 0.25 | 12600 | 7500 | 1250 | 9.10  | 0.7458 | 0.7542 | 0.2458 | 0.2542 | 11123 | 7584 | 1293 | 11378 | 7414 | 1208 | 198.46 | 133.77 |
| 20000 | 1.13 | 0.75 | 0.25 | 12713 | 7500 | 1250 | 10.59 | 0.7458 | 0.7542 | 0.2458 | 0.2542 | 11123 | 7584 | 1293 | 11378 | 7414 | 1208 | 229.48 | 159.06 |
| 20000 | 1.14 | 0.75 | 0.25 | 12825 | 7500 | 1250 | 12.18 | 0.7458 | 0.7542 | 0.2458 | 0.2542 | 11123 | 7584 | 1293 | 11378 | 7414 | 1208 | 262.77 | 186.57 |
| 20000 | 1.15 | 0.75 | 0.25 | 12938 | 7500 | 1250 | 13.86 | 0.7458 | 0.7542 | 0.2458 | 0.2542 | 11123 | 7584 | 1293 | 11378 | 7414 | 1208 | 298.33 | 216.30 |
| 20000 | 1.16 | 0.75 | 0.25 | 13050 | 7500 | 1250 | 15.64 | 0.7458 | 0.7542 | 0.2458 | 0.2542 | 11123 | 7584 | 1293 | 11378 | 7414 | 1208 | 336.17 | 248.26 |
| 20000 | 1.17 | 0.75 | 0.25 | 13163 | 7500 | 1250 | 17.51 | 0.7458 | 0.7542 | 0.2458 | 0.2542 | 11123 | 7584 | 1293 | 11378 | 7414 | 1208 | 376.29 | 282.44 |
| 20000 | 1.18 | 0.75 | 0.25 | 13275 | 7500 | 1250 | 19.47 | 0.7458 | 0.7542 | 0.2458 | 0.2542 | 11123 | 7584 | 1293 | 11378 | 7414 | 1208 | 418.68 | 318.85 |
| 20000 | 1.19 | 0.75 | 0.25 | 13388 | 7500 | 1250 | 21.52 | 0.7458 | 0.7542 | 0.2458 | 0.2542 | 11123 | 7584 | 1293 | 11378 | 7414 | 1208 | 463.35 | 357.49 |
| 20000 | 1.20 | 0.75 | 0.25 | 13500 | 7500 | 1250 | 23.66 | 0.7458 | 0.7542 | 0.2458 | 0.2542 | 11123 | 7584 | 1293 | 11378 | 7414 | 1208 | 510.29 | 398.34 |
| 20000 | 0.80 | 0.8  | 0.2  | 10240 | 6400 | 800  | 25.31 | 0.7961 | 0.8039 | 0.1961 | 0.2039 | 12675 | 6493 | 832  | 12926 | 6305 | 769  | 470.29 | 560.73 |
| 20000 | 0.81 | 0.8  | 0.2  | 10368 | 6400 | 800  | 22.58 | 0.7961 | 0.8039 | 0.1961 | 0.2039 | 12675 | 6493 | 832  | 12926 | 6305 | 769  | 422.41 | 508.80 |
| 20000 | 0.82 | 0.8  | 0.2  | 10496 | 6400 | 800  | 20.03 | 0.7961 | 0.8039 | 0.1961 | 0.2039 | 12675 | 6493 | 832  | 12926 | 6305 | 769  | 377.11 | 459.41 |
| 20000 | 0.83 | 0.8  | 0.2  | 10624 | 6400 | 800  | 17.67 | 0.7961 | 0.8039 | 0.1961 | 0.2039 | 12675 | 6493 | 832  | 12926 | 6305 | 769  | 334.39 | 412.56 |
| 20000 | 0.84 | 0.8  | 0.2  | 10752 | 6400 | 800  | 15.47 | 0.7961 | 0.8039 | 0.1961 | 0.2039 | 12675 | 6493 | 832  | 12926 | 6305 | 769  | 294.26 | 368.24 |
| 20000 | 0.85 | 0.8  | 0.2  | 10880 | 6400 | 800  | 13.45 | 0.7961 | 0.8039 | 0.1961 | 0.2039 | 12675 | 6493 | 832  | 12926 | 6305 | 769  | 256.72 | 326.45 |
| 20000 | 0.86 | 0.8  | 0.2  | 11008 | 6400 | 800  | 11.59 | 0.7961 | 0.8039 | 0.1961 | 0.2039 | 12675 | 6493 | 832  | 12926 | 6305 | 769  | 221.76 | 287.21 |
| 20000 | 0.87 | 0.8  | 0.2  | 11136 | 6400 | 800  | 9.88  | 0.7961 | 0.8039 | 0.1961 | 0.2039 | 12675 | 6493 | 832  | 12926 | 6305 | 769  | 189.39 | 250.49 |
| 20000 | 0.88 | 0.8  | 0.2  | 11264 | 6400 | 800  | 8.33  | 0.7961 | 0.8039 | 0.1961 | 0.2039 | 12675 | 6493 | 832  | 12926 | 6305 | 769  | 159.60 | 216.31 |
| 20000 | 0.89 | 0.8  | 0.2  | 11392 | 6400 | 800  | 6.92  | 0.7961 | 0.8039 | 0.1961 | 0.2039 | 12675 | 6493 | 832  | 12926 | 6305 | 769  | 132.39 | 184.67 |
| 20000 | 0.90 | 0.8  | 0.2  | 11520 | 6400 | 800  | 5.66  | 0.7961 | 0.8039 | 0.1961 | 0.2039 | 12675 | 6493 | 832  | 12926 | 6305 | 769  | 107.78 | 155.56 |
| 20000 | 0.91 | 0.8  | 0.2  | 11648 | 6400 | 800  | 4.54  | 0.7961 | 0.8039 | 0.1961 | 0.2039 | 12675 | 6493 | 832  | 12926 | 6305 | 769  | 85.74  | 128.99 |

|       |      |      |      |       |      |     |       |        |        |        |        |       |      |     |       |      |     |        |        |
|-------|------|------|------|-------|------|-----|-------|--------|--------|--------|--------|-------|------|-----|-------|------|-----|--------|--------|
| 20000 | 0.92 | 0.8  | 0.2  | 11776 | 6400 | 800 | 3.55  | 0.7961 | 0.8039 | 0.1961 | 0.2039 | 12675 | 6493 | 832 | 12926 | 6305 | 769 | 66.30  | 104.95 |
| 20000 | 0.93 | 0.8  | 0.2  | 11904 | 6400 | 800 | 2.69  | 0.7961 | 0.8039 | 0.1961 | 0.2039 | 12675 | 6493 | 832 | 12926 | 6305 | 769 | 49.43  | 83.44  |
| 20000 | 0.94 | 0.8  | 0.2  | 12032 | 6400 | 800 | 1.96  | 0.7961 | 0.8039 | 0.1961 | 0.2039 | 12675 | 6493 | 832 | 12926 | 6305 | 769 | 35.16  | 64.47  |
| 20000 | 0.95 | 0.8  | 0.2  | 12160 | 6400 | 800 | 1.34  | 0.7961 | 0.8039 | 0.1961 | 0.2039 | 12675 | 6493 | 832 | 12926 | 6305 | 769 | 23.47  | 48.04  |
| 20000 | 0.96 | 0.8  | 0.2  | 12288 | 6400 | 800 | 0.85  | 0.7961 | 0.8039 | 0.1961 | 0.2039 | 12675 | 6493 | 832 | 12926 | 6305 | 769 | 14.36  | 34.14  |
| 20000 | 0.97 | 0.8  | 0.2  | 12416 | 6400 | 800 | 0.47  | 0.7961 | 0.8039 | 0.1961 | 0.2039 | 12675 | 6493 | 832 | 12926 | 6305 | 769 | 7.84   | 22.78  |
| 20000 | 0.98 | 0.8  | 0.2  | 12544 | 6400 | 800 | 0.21  | 0.7961 | 0.8039 | 0.1961 | 0.2039 | 12675 | 6493 | 832 | 12926 | 6305 | 769 | 3.90   | 13.95  |
| 20000 | 0.99 | 0.8  | 0.2  | 12672 | 6400 | 800 | 0.05  | 0.7961 | 0.8039 | 0.1961 | 0.2039 | 12675 | 6493 | 832 | 12926 | 6305 | 769 | 2.55   | 7.66   |
| 20000 | 1.00 | 0.8  | 0.2  | 12800 | 6400 | 800 | 0.00  | 0.7961 | 0.8039 | 0.1961 | 0.2039 | 12675 | 6493 | 832 | 12926 | 6305 | 769 | 3.79   | 3.90   |
| 20000 | 1.01 | 0.8  | 0.2  | 12928 | 6400 | 800 | 0.05  | 0.7961 | 0.8039 | 0.1961 | 0.2039 | 12675 | 6493 | 832 | 12926 | 6305 | 769 | 7.61   | 2.68   |
| 20000 | 1.02 | 0.8  | 0.2  | 13056 | 6400 | 800 | 0.20  | 0.7961 | 0.8039 | 0.1961 | 0.2039 | 12675 | 6493 | 832 | 12926 | 6305 | 769 | 14.01  | 3.99   |
| 20000 | 1.03 | 0.8  | 0.2  | 13184 | 6400 | 800 | 0.45  | 0.7961 | 0.8039 | 0.1961 | 0.2039 | 12675 | 6493 | 832 | 12926 | 6305 | 769 | 23.00  | 7.84   |
| 20000 | 1.04 | 0.8  | 0.2  | 13312 | 6400 | 800 | 0.79  | 0.7961 | 0.8039 | 0.1961 | 0.2039 | 12675 | 6493 | 832 | 12926 | 6305 | 769 | 34.58  | 14.22  |
| 20000 | 1.05 | 0.8  | 0.2  | 13440 | 6400 | 800 | 1.22  | 0.7961 | 0.8039 | 0.1961 | 0.2039 | 12675 | 6493 | 832 | 12926 | 6305 | 769 | 48.74  | 23.14  |
| 20000 | 1.06 | 0.8  | 0.2  | 13568 | 6400 | 800 | 1.74  | 0.7961 | 0.8039 | 0.1961 | 0.2039 | 12675 | 6493 | 832 | 12926 | 6305 | 769 | 65.49  | 34.59  |
| 20000 | 1.07 | 0.8  | 0.2  | 13696 | 6400 | 800 | 2.35  | 0.7961 | 0.8039 | 0.1961 | 0.2039 | 12675 | 6493 | 832 | 12926 | 6305 | 769 | 84.82  | 48.58  |
| 20000 | 1.08 | 0.8  | 0.2  | 13824 | 6400 | 800 | 3.04  | 0.7961 | 0.8039 | 0.1961 | 0.2039 | 12675 | 6493 | 832 | 12926 | 6305 | 769 | 106.73 | 65.10  |
| 20000 | 1.09 | 0.8  | 0.2  | 13952 | 6400 | 800 | 3.82  | 0.7961 | 0.8039 | 0.1961 | 0.2039 | 12675 | 6493 | 832 | 12926 | 6305 | 769 | 131.24 | 84.16  |
| 20000 | 1.10 | 0.8  | 0.2  | 14080 | 6400 | 800 | 4.67  | 0.7961 | 0.8039 | 0.1961 | 0.2039 | 12675 | 6493 | 832 | 12926 | 6305 | 769 | 158.32 | 105.75 |
| 20000 | 1.11 | 0.8  | 0.2  | 14208 | 6400 | 800 | 5.60  | 0.7961 | 0.8039 | 0.1961 | 0.2039 | 12675 | 6493 | 832 | 12926 | 6305 | 769 | 188.00 | 129.88 |
| 20000 | 1.12 | 0.8  | 0.2  | 14336 | 6400 | 800 | 6.61  | 0.7961 | 0.8039 | 0.1961 | 0.2039 | 12675 | 6493 | 832 | 12926 | 6305 | 769 | 220.25 | 156.54 |
| 20000 | 1.13 | 0.8  | 0.2  | 14464 | 6400 | 800 | 7.69  | 0.7961 | 0.8039 | 0.1961 | 0.2039 | 12675 | 6493 | 832 | 12926 | 6305 | 769 | 255.10 | 185.74 |
| 20000 | 1.14 | 0.8  | 0.2  | 14592 | 6400 | 800 | 8.84  | 0.7961 | 0.8039 | 0.1961 | 0.2039 | 12675 | 6493 | 832 | 12926 | 6305 | 769 | 292.53 | 217.47 |
| 20000 | 1.15 | 0.8  | 0.2  | 14720 | 6400 | 800 | 10.07 | 0.7961 | 0.8039 | 0.1961 | 0.2039 | 12675 | 6493 | 832 | 12926 | 6305 | 769 | 332.54 | 251.74 |
| 20000 | 1.16 | 0.8  | 0.2  | 14848 | 6400 | 800 | 11.36 | 0.7961 | 0.8039 | 0.1961 | 0.2039 | 12675 | 6493 | 832 | 12926 | 6305 | 769 | 375.14 | 288.54 |
| 20000 | 1.17 | 0.8  | 0.2  | 14976 | 6400 | 800 | 12.71 | 0.7961 | 0.8039 | 0.1961 | 0.2039 | 12675 | 6493 | 832 | 12926 | 6305 | 769 | 420.32 | 327.88 |
| 20000 | 1.18 | 0.8  | 0.2  | 15104 | 6400 | 800 | 14.14 | 0.7961 | 0.8039 | 0.1961 | 0.2039 | 12675 | 6493 | 832 | 12926 | 6305 | 769 | 468.09 | 369.76 |
| 20000 | 1.19 | 0.8  | 0.2  | 15232 | 6400 | 800 | 15.62 | 0.7961 | 0.8039 | 0.1961 | 0.2039 | 12675 | 6493 | 832 | 12926 | 6305 | 769 | 518.45 | 414.17 |
| 20000 | 1.20 | 0.8  | 0.2  | 15360 | 6400 | 800 | 17.17 | 0.7961 | 0.8039 | 0.1961 | 0.2039 | 12675 | 6493 | 832 | 12926 | 6305 | 769 | 571.39 | 461.11 |
| 20000 | 0.80 | 0.85 | 0.15 | 11560 | 5100 | 450 | 16.15 | 0.8465 | 0.8535 | 0.1465 | 0.1535 | 14331 | 5197 | 471 | 14569 | 5002 | 429 | 538.67 | 624.49 |
| 20000 | 0.81 | 0.85 | 0.15 | 11705 | 5100 | 450 | 14.40 | 0.8465 | 0.8535 | 0.1465 | 0.1535 | 14331 | 5197 | 471 | 14569 | 5002 | 429 | 484.24 | 566.23 |
| 20000 | 0.82 | 0.85 | 0.15 | 11849 | 5100 | 450 | 12.77 | 0.8465 | 0.8535 | 0.1465 | 0.1535 | 14331 | 5197 | 471 | 14569 | 5002 | 429 | 432.73 | 510.83 |
| 20000 | 0.83 | 0.85 | 0.15 | 11994 | 5100 | 450 | 11.26 | 0.8465 | 0.8535 | 0.1465 | 0.1535 | 14331 | 5197 | 471 | 14569 | 5002 | 429 | 384.13 | 458.31 |
| 20000 | 0.84 | 0.85 | 0.15 | 12138 | 5100 | 450 | 9.86  | 0.8465 | 0.8535 | 0.1465 | 0.1535 | 14331 | 5197 | 471 | 14569 | 5002 | 429 | 338.45 | 408.65 |
| 20000 | 0.85 | 0.85 | 0.15 | 12283 | 5100 | 450 | 8.57  | 0.8465 | 0.8535 | 0.1465 | 0.1535 | 14331 | 5197 | 471 | 14569 | 5002 | 429 | 295.67 | 361.86 |

|       |      |      |      |       |      |     |       |        |        |        |        |       |      |     |       |      |     |        |        |
|-------|------|------|------|-------|------|-----|-------|--------|--------|--------|--------|-------|------|-----|-------|------|-----|--------|--------|
| 20000 | 0.86 | 0.85 | 0.15 | 12427 | 5100 | 450 | 7.38  | 0.8465 | 0.8535 | 0.1465 | 0.1535 | 14331 | 5197 | 471 | 14569 | 5002 | 429 | 255.82 | 317.93 |
| 20000 | 0.87 | 0.85 | 0.15 | 12572 | 5100 | 450 | 6.29  | 0.8465 | 0.8535 | 0.1465 | 0.1535 | 14331 | 5197 | 471 | 14569 | 5002 | 429 | 218.87 | 276.87 |
| 20000 | 0.88 | 0.85 | 0.15 | 12716 | 5100 | 450 | 5.30  | 0.8465 | 0.8535 | 0.1465 | 0.1535 | 14331 | 5197 | 471 | 14569 | 5002 | 429 | 184.84 | 238.67 |
| 20000 | 0.89 | 0.85 | 0.15 | 12861 | 5100 | 450 | 4.41  | 0.8465 | 0.8535 | 0.1465 | 0.1535 | 14331 | 5197 | 471 | 14569 | 5002 | 429 | 153.73 | 203.35 |
| 20000 | 0.90 | 0.85 | 0.15 | 13005 | 5100 | 450 | 3.60  | 0.8465 | 0.8535 | 0.1465 | 0.1535 | 14331 | 5197 | 471 | 14569 | 5002 | 429 | 125.52 | 170.88 |
| 20000 | 0.91 | 0.85 | 0.15 | 13150 | 5100 | 450 | 2.89  | 0.8465 | 0.8535 | 0.1465 | 0.1535 | 14331 | 5197 | 471 | 14569 | 5002 | 429 | 100.24 | 141.29 |
| 20000 | 0.92 | 0.85 | 0.15 | 13294 | 5100 | 450 | 2.26  | 0.8465 | 0.8535 | 0.1465 | 0.1535 | 14331 | 5197 | 471 | 14569 | 5002 | 429 | 77.86  | 114.56 |
| 20000 | 0.93 | 0.85 | 0.15 | 13439 | 5100 | 450 | 1.71  | 0.8465 | 0.8535 | 0.1465 | 0.1535 | 14331 | 5197 | 471 | 14569 | 5002 | 429 | 58.40  | 90.70  |
| 20000 | 0.94 | 0.85 | 0.15 | 13583 | 5100 | 450 | 1.24  | 0.8465 | 0.8535 | 0.1465 | 0.1535 | 14331 | 5197 | 471 | 14569 | 5002 | 429 | 41.85  | 69.70  |
| 20000 | 0.95 | 0.85 | 0.15 | 13728 | 5100 | 450 | 0.85  | 0.8465 | 0.8535 | 0.1465 | 0.1535 | 14331 | 5197 | 471 | 14569 | 5002 | 429 | 28.22  | 51.57  |
| 20000 | 0.96 | 0.85 | 0.15 | 13872 | 5100 | 450 | 0.54  | 0.8465 | 0.8535 | 0.1465 | 0.1535 | 14331 | 5197 | 471 | 14569 | 5002 | 429 | 17.50  | 36.31  |
| 20000 | 0.97 | 0.85 | 0.15 | 14017 | 5100 | 450 | 0.30  | 0.8465 | 0.8535 | 0.1465 | 0.1535 | 14331 | 5197 | 471 | 14569 | 5002 | 429 | 9.70   | 23.91  |
| 20000 | 0.98 | 0.85 | 0.15 | 14161 | 5100 | 450 | 0.13  | 0.8465 | 0.8535 | 0.1465 | 0.1535 | 14331 | 5197 | 471 | 14569 | 5002 | 429 | 4.81   | 14.38  |
| 20000 | 0.99 | 0.85 | 0.15 | 14306 | 5100 | 450 | 0.03  | 0.8465 | 0.8535 | 0.1465 | 0.1535 | 14331 | 5197 | 471 | 14569 | 5002 | 429 | 2.83   | 7.72   |
| 20000 | 1.00 | 0.85 | 0.15 | 14450 | 5100 | 450 | 0.00  | 0.8465 | 0.8535 | 0.1465 | 0.1535 | 14331 | 5197 | 471 | 14569 | 5002 | 429 | 3.77   | 3.92   |
| 20000 | 1.01 | 0.85 | 0.15 | 14595 | 5100 | 450 | 0.03  | 0.8465 | 0.8535 | 0.1465 | 0.1535 | 14331 | 5197 | 471 | 14569 | 5002 | 429 | 7.62   | 2.99   |
| 20000 | 1.02 | 0.85 | 0.15 | 14739 | 5100 | 450 | 0.13  | 0.8465 | 0.8535 | 0.1465 | 0.1535 | 14331 | 5197 | 471 | 14569 | 5002 | 429 | 14.39  | 4.92   |
| 20000 | 1.03 | 0.85 | 0.15 | 14884 | 5100 | 450 | 0.28  | 0.8465 | 0.8535 | 0.1465 | 0.1535 | 14331 | 5197 | 471 | 14569 | 5002 | 429 | 24.07  | 9.72   |
| 20000 | 1.04 | 0.85 | 0.15 | 15028 | 5100 | 450 | 0.50  | 0.8465 | 0.8535 | 0.1465 | 0.1535 | 14331 | 5197 | 471 | 14569 | 5002 | 429 | 36.66  | 17.39  |
| 20000 | 1.05 | 0.85 | 0.15 | 15173 | 5100 | 450 | 0.77  | 0.8465 | 0.8535 | 0.1465 | 0.1535 | 14331 | 5197 | 471 | 14569 | 5002 | 429 | 52.17  | 27.92  |
| 20000 | 1.06 | 0.85 | 0.15 | 15317 | 5100 | 450 | 1.11  | 0.8465 | 0.8535 | 0.1465 | 0.1535 | 14331 | 5197 | 471 | 14569 | 5002 | 429 | 70.59  | 41.32  |
| 20000 | 1.07 | 0.85 | 0.15 | 15462 | 5100 | 450 | 1.49  | 0.8465 | 0.8535 | 0.1465 | 0.1535 | 14331 | 5197 | 471 | 14569 | 5002 | 429 | 91.92  | 57.59  |
| 20000 | 1.08 | 0.85 | 0.15 | 15606 | 5100 | 450 | 1.93  | 0.8465 | 0.8535 | 0.1465 | 0.1535 | 14331 | 5197 | 471 | 14569 | 5002 | 429 | 116.17 | 76.72  |
| 20000 | 1.09 | 0.85 | 0.15 | 15751 | 5100 | 450 | 2.42  | 0.8465 | 0.8535 | 0.1465 | 0.1535 | 14331 | 5197 | 471 | 14569 | 5002 | 429 | 143.33 | 98.72  |
| 20000 | 1.10 | 0.85 | 0.15 | 15895 | 5100 | 450 | 2.96  | 0.8465 | 0.8535 | 0.1465 | 0.1535 | 14331 | 5197 | 471 | 14569 | 5002 | 429 | 173.41 | 123.59 |
| 20000 | 1.11 | 0.85 | 0.15 | 16040 | 5100 | 450 | 3.55  | 0.8465 | 0.8535 | 0.1465 | 0.1535 | 14331 | 5197 | 471 | 14569 | 5002 | 429 | 206.40 | 151.32 |
| 20000 | 1.12 | 0.85 | 0.15 | 16184 | 5100 | 450 | 4.19  | 0.8465 | 0.8535 | 0.1465 | 0.1535 | 14331 | 5197 | 471 | 14569 | 5002 | 429 | 242.31 | 181.92 |
| 20000 | 1.13 | 0.85 | 0.15 | 16329 | 5100 | 450 | 4.87  | 0.8465 | 0.8535 | 0.1465 | 0.1535 | 14331 | 5197 | 471 | 14569 | 5002 | 429 | 281.12 | 215.38 |
| 20000 | 1.14 | 0.85 | 0.15 | 16473 | 5100 | 450 | 5.60  | 0.8465 | 0.8535 | 0.1465 | 0.1535 | 14331 | 5197 | 471 | 14569 | 5002 | 429 | 322.86 | 251.71 |
| 20000 | 1.15 | 0.85 | 0.15 | 16618 | 5100 | 450 | 6.38  | 0.8465 | 0.8535 | 0.1465 | 0.1535 | 14331 | 5197 | 471 | 14569 | 5002 | 429 | 367.50 | 290.91 |
| 20000 | 1.16 | 0.85 | 0.15 | 16762 | 5100 | 450 | 7.20  | 0.8465 | 0.8535 | 0.1465 | 0.1535 | 14331 | 5197 | 471 | 14569 | 5002 | 429 | 415.06 | 332.97 |
| 20000 | 1.17 | 0.85 | 0.15 | 16907 | 5100 | 450 | 8.05  | 0.8465 | 0.8535 | 0.1465 | 0.1535 | 14331 | 5197 | 471 | 14569 | 5002 | 429 | 465.54 | 377.90 |
| 20000 | 1.18 | 0.85 | 0.15 | 17051 | 5100 | 450 | 8.95  | 0.8465 | 0.8535 | 0.1465 | 0.1535 | 14331 | 5197 | 471 | 14569 | 5002 | 429 | 518.93 | 425.70 |
| 20000 | 1.19 | 0.85 | 0.15 | 17196 | 5100 | 450 | 9.89  | 0.8465 | 0.8535 | 0.1465 | 0.1535 | 14331 | 5197 | 471 | 14569 | 5002 | 429 | 575.23 | 476.36 |
| 20000 | 1.20 | 0.85 | 0.15 | 17340 | 5100 | 450 | 10.87 | 0.8465 | 0.8535 | 0.1465 | 0.1535 | 14331 | 5197 | 471 | 14569 | 5002 | 429 | 634.44 | 529.89 |

|       |      |     |     |       |      |     |      |        |        |        |        |       |      |     |       |      |     |        |        |
|-------|------|-----|-----|-------|------|-----|------|--------|--------|--------|--------|-------|------|-----|-------|------|-----|--------|--------|
| 20000 | 0.80 | 0.9 | 0.1 | 12960 | 3600 | 200 | 8.08 | 0.8971 | 0.9029 | 0.0971 | 0.1029 | 16094 | 3694 | 212 | 16306 | 3506 | 188 | 613.45 | 689.86 |
| 20000 | 0.81 | 0.9 | 0.1 | 13122 | 3600 | 200 | 7.20 | 0.8971 | 0.9029 | 0.0971 | 0.1029 | 16094 | 3694 | 212 | 16306 | 3506 | 188 | 551.99 | 624.99 |
| 20000 | 0.82 | 0.9 | 0.1 | 13284 | 3600 | 200 | 6.38 | 0.8971 | 0.9029 | 0.0971 | 0.1029 | 16094 | 3694 | 212 | 16306 | 3506 | 188 | 493.78 | 563.33 |
| 20000 | 0.83 | 0.9 | 0.1 | 13446 | 3600 | 200 | 5.63 | 0.8971 | 0.9029 | 0.0971 | 0.1029 | 16094 | 3694 | 212 | 16306 | 3506 | 188 | 438.84 | 504.89 |
| 20000 | 0.84 | 0.9 | 0.1 | 13608 | 3600 | 200 | 4.93 | 0.8971 | 0.9029 | 0.0971 | 0.1029 | 16094 | 3694 | 212 | 16306 | 3506 | 188 | 387.15 | 449.67 |
| 20000 | 0.85 | 0.9 | 0.1 | 13770 | 3600 | 200 | 4.28 | 0.8971 | 0.9029 | 0.0971 | 0.1029 | 16094 | 3694 | 212 | 16306 | 3506 | 188 | 338.73 | 397.67 |
| 20000 | 0.86 | 0.9 | 0.1 | 13932 | 3600 | 200 | 3.69 | 0.8971 | 0.9029 | 0.0971 | 0.1029 | 16094 | 3694 | 212 | 16306 | 3506 | 188 | 293.57 | 348.89 |
| 20000 | 0.87 | 0.9 | 0.1 | 14094 | 3600 | 200 | 3.14 | 0.8971 | 0.9029 | 0.0971 | 0.1029 | 16094 | 3694 | 212 | 16306 | 3506 | 188 | 251.67 | 303.33 |
| 20000 | 0.88 | 0.9 | 0.1 | 14256 | 3600 | 200 | 2.65 | 0.8971 | 0.9029 | 0.0971 | 0.1029 | 16094 | 3694 | 212 | 16306 | 3506 | 188 | 213.03 | 260.99 |
| 20000 | 0.89 | 0.9 | 0.1 | 14418 | 3600 | 200 | 2.20 | 0.8971 | 0.9029 | 0.0971 | 0.1029 | 16094 | 3694 | 212 | 16306 | 3506 | 188 | 177.65 | 221.86 |
| 20000 | 0.90 | 0.9 | 0.1 | 14580 | 3600 | 200 | 1.80 | 0.8971 | 0.9029 | 0.0971 | 0.1029 | 16094 | 3694 | 212 | 16306 | 3506 | 188 | 145.54 | 185.96 |
| 20000 | 0.91 | 0.9 | 0.1 | 14742 | 3600 | 200 | 1.44 | 0.8971 | 0.9029 | 0.0971 | 0.1029 | 16094 | 3694 | 212 | 16306 | 3506 | 188 | 116.68 | 153.27 |
| 20000 | 0.92 | 0.9 | 0.1 | 14904 | 3600 | 200 | 1.13 | 0.8971 | 0.9029 | 0.0971 | 0.1029 | 16094 | 3694 | 212 | 16306 | 3506 | 188 | 91.09  | 123.80 |
| 20000 | 0.93 | 0.9 | 0.1 | 15066 | 3600 | 200 | 0.85 | 0.8971 | 0.9029 | 0.0971 | 0.1029 | 16094 | 3694 | 212 | 16306 | 3506 | 188 | 68.75  | 97.55  |
| 20000 | 0.94 | 0.9 | 0.1 | 15228 | 3600 | 200 | 0.62 | 0.8971 | 0.9029 | 0.0971 | 0.1029 | 16094 | 3694 | 212 | 16306 | 3506 | 188 | 49.68  | 74.52  |
| 20000 | 0.95 | 0.9 | 0.1 | 15390 | 3600 | 200 | 0.43 | 0.8971 | 0.9029 | 0.0971 | 0.1029 | 16094 | 3694 | 212 | 16306 | 3506 | 188 | 33.87  | 54.71  |
| 20000 | 0.96 | 0.9 | 0.1 | 15552 | 3600 | 200 | 0.27 | 0.8971 | 0.9029 | 0.0971 | 0.1029 | 16094 | 3694 | 212 | 16306 | 3506 | 188 | 21.33  | 38.12  |
| 20000 | 0.97 | 0.9 | 0.1 | 15714 | 3600 | 200 | 0.15 | 0.8971 | 0.9029 | 0.0971 | 0.1029 | 16094 | 3694 | 212 | 16306 | 3506 | 188 | 12.04  | 24.75  |
| 20000 | 0.98 | 0.9 | 0.1 | 15876 | 3600 | 200 | 0.07 | 0.8971 | 0.9029 | 0.0971 | 0.1029 | 16094 | 3694 | 212 | 16306 | 3506 | 188 | 6.01   | 14.60  |
| 20000 | 0.99 | 0.9 | 0.1 | 16038 | 3600 | 200 | 0.02 | 0.8971 | 0.9029 | 0.0971 | 0.1029 | 16094 | 3694 | 212 | 16306 | 3506 | 188 | 3.25   | 7.66   |
| 20000 | 1.00 | 0.9 | 0.1 | 16200 | 3600 | 200 | 0.00 | 0.8971 | 0.9029 | 0.0971 | 0.1029 | 16094 | 3694 | 212 | 16306 | 3506 | 188 | 3.74   | 3.95   |
| 20000 | 1.01 | 0.9 | 0.1 | 16362 | 3600 | 200 | 0.02 | 0.8971 | 0.9029 | 0.0971 | 0.1029 | 16094 | 3694 | 212 | 16306 | 3506 | 188 | 7.50   | 3.45   |
| 20000 | 1.02 | 0.9 | 0.1 | 16524 | 3600 | 200 | 0.06 | 0.8971 | 0.9029 | 0.0971 | 0.1029 | 16094 | 3694 | 212 | 16306 | 3506 | 188 | 14.52  | 6.17   |
| 20000 | 1.03 | 0.9 | 0.1 | 16686 | 3600 | 200 | 0.14 | 0.8971 | 0.9029 | 0.0971 | 0.1029 | 16094 | 3694 | 212 | 16306 | 3506 | 188 | 24.80  | 12.11  |
| 20000 | 1.04 | 0.9 | 0.1 | 16848 | 3600 | 200 | 0.25 | 0.8971 | 0.9029 | 0.0971 | 0.1029 | 16094 | 3694 | 212 | 16306 | 3506 | 188 | 38.34  | 21.27  |
| 20000 | 1.05 | 0.9 | 0.1 | 17010 | 3600 | 200 | 0.39 | 0.8971 | 0.9029 | 0.0971 | 0.1029 | 16094 | 3694 | 212 | 16306 | 3506 | 188 | 55.15  | 33.65  |
| 20000 | 1.06 | 0.9 | 0.1 | 17172 | 3600 | 200 | 0.55 | 0.8971 | 0.9029 | 0.0971 | 0.1029 | 16094 | 3694 | 212 | 16306 | 3506 | 188 | 75.21  | 49.25  |
| 20000 | 1.07 | 0.9 | 0.1 | 17334 | 3600 | 200 | 0.74 | 0.8971 | 0.9029 | 0.0971 | 0.1029 | 16094 | 3694 | 212 | 16306 | 3506 | 188 | 98.54  | 68.06  |
| 20000 | 1.08 | 0.9 | 0.1 | 17496 | 3600 | 200 | 0.96 | 0.8971 | 0.9029 | 0.0971 | 0.1029 | 16094 | 3694 | 212 | 16306 | 3506 | 188 | 125.12 | 90.10  |
| 20000 | 1.09 | 0.9 | 0.1 | 17658 | 3600 | 200 | 1.20 | 0.8971 | 0.9029 | 0.0971 | 0.1029 | 16094 | 3694 | 212 | 16306 | 3506 | 188 | 154.97 | 115.35 |
| 20000 | 1.10 | 0.9 | 0.1 | 17820 | 3600 | 200 | 1.47 | 0.8971 | 0.9029 | 0.0971 | 0.1029 | 16094 | 3694 | 212 | 16306 | 3506 | 188 | 188.08 | 143.83 |
| 20000 | 1.11 | 0.9 | 0.1 | 17982 | 3600 | 200 | 1.77 | 0.8971 | 0.9029 | 0.0971 | 0.1029 | 16094 | 3694 | 212 | 16306 | 3506 | 188 | 224.45 | 175.52 |
| 20000 | 1.12 | 0.9 | 0.1 | 18144 | 3600 | 200 | 2.08 | 0.8971 | 0.9029 | 0.0971 | 0.1029 | 16094 | 3694 | 212 | 16306 | 3506 | 188 | 264.08 | 210.43 |
| 20000 | 1.13 | 0.9 | 0.1 | 18306 | 3600 | 200 | 2.43 | 0.8971 | 0.9029 | 0.0971 | 0.1029 | 16094 | 3694 | 212 | 16306 | 3506 | 188 | 306.98 | 248.56 |
| 20000 | 1.14 | 0.9 | 0.1 | 18468 | 3600 | 200 | 2.79 | 0.8971 | 0.9029 | 0.0971 | 0.1029 | 16094 | 3694 | 212 | 16306 | 3506 | 188 | 353.13 | 289.91 |

|       |      |      |      |       |      |     |      |        |        |        |        |       |      |     |       |      |     |        |        |
|-------|------|------|------|-------|------|-----|------|--------|--------|--------|--------|-------|------|-----|-------|------|-----|--------|--------|
| 20000 | 1.15 | 0.9  | 0.1  | 18630 | 3600 | 200 | 3.17 | 0.8971 | 0.9029 | 0.0971 | 0.1029 | 16094 | 3694 | 212 | 16306 | 3506 | 188 | 402.55 | 334.48 |
| 20000 | 1.16 | 0.9  | 0.1  | 18792 | 3600 | 200 | 3.58 | 0.8971 | 0.9029 | 0.0971 | 0.1029 | 16094 | 3694 | 212 | 16306 | 3506 | 188 | 455.22 | 382.27 |
| 20000 | 1.17 | 0.9  | 0.1  | 18954 | 3600 | 200 | 4.01 | 0.8971 | 0.9029 | 0.0971 | 0.1029 | 16094 | 3694 | 212 | 16306 | 3506 | 188 | 511.16 | 433.27 |
| 20000 | 1.18 | 0.9  | 0.1  | 19116 | 3600 | 200 | 4.45 | 0.8971 | 0.9029 | 0.0971 | 0.1029 | 16094 | 3694 | 212 | 16306 | 3506 | 188 | 570.36 | 487.50 |
| 20000 | 1.19 | 0.9  | 0.1  | 19278 | 3600 | 200 | 4.92 | 0.8971 | 0.9029 | 0.0971 | 0.1029 | 16094 | 3694 | 212 | 16306 | 3506 | 188 | 632.82 | 544.94 |
| 20000 | 1.20 | 0.9  | 0.1  | 19440 | 3600 | 200 | 5.41 | 0.8971 | 0.9029 | 0.0971 | 0.1029 | 16094 | 3694 | 212 | 16306 | 3506 | 188 | 698.54 | 605.60 |
| 20000 | 0.80 | 0.95 | 0.05 | 14440 | 1900 | 50  | 2.25 | 0.9479 | 0.9521 | 0.0479 | 0.0521 | 17969 | 1977 | 54  | 18131 | 1823 | 46  | 696.38 | 755.12 |
| 20000 | 0.81 | 0.95 | 0.05 | 14621 | 1900 | 50  | 2.01 | 0.9479 | 0.9521 | 0.0479 | 0.0521 | 17969 | 1977 | 54  | 18131 | 1823 | 46  | 627.29 | 683.43 |
| 20000 | 0.82 | 0.95 | 0.05 | 14801 | 1900 | 50  | 1.78 | 0.9479 | 0.9521 | 0.0479 | 0.0521 | 17969 | 1977 | 54  | 18131 | 1823 | 46  | 561.83 | 615.32 |
| 20000 | 0.83 | 0.95 | 0.05 | 14982 | 1900 | 50  | 1.57 | 0.9479 | 0.9521 | 0.0479 | 0.0521 | 17969 | 1977 | 54  | 18131 | 1823 | 46  | 500.00 | 550.81 |
| 20000 | 0.84 | 0.95 | 0.05 | 15162 | 1900 | 50  | 1.37 | 0.9479 | 0.9521 | 0.0479 | 0.0521 | 17969 | 1977 | 54  | 18131 | 1823 | 46  | 441.80 | 489.90 |
| 20000 | 0.85 | 0.95 | 0.05 | 15343 | 1900 | 50  | 1.19 | 0.9479 | 0.9521 | 0.0479 | 0.0521 | 17969 | 1977 | 54  | 18131 | 1823 | 46  | 387.22 | 432.58 |
| 20000 | 0.86 | 0.95 | 0.05 | 15523 | 1900 | 50  | 1.03 | 0.9479 | 0.9521 | 0.0479 | 0.0521 | 17969 | 1977 | 54  | 18131 | 1823 | 46  | 336.27 | 378.85 |
| 20000 | 0.87 | 0.95 | 0.05 | 15704 | 1900 | 50  | 0.88 | 0.9479 | 0.9521 | 0.0479 | 0.0521 | 17969 | 1977 | 54  | 18131 | 1823 | 46  | 288.94 | 328.71 |
| 20000 | 0.88 | 0.95 | 0.05 | 15884 | 1900 | 50  | 0.74 | 0.9479 | 0.9521 | 0.0479 | 0.0521 | 17969 | 1977 | 54  | 18131 | 1823 | 46  | 245.24 | 282.17 |
| 20000 | 0.89 | 0.95 | 0.05 | 16065 | 1900 | 50  | 0.61 | 0.9479 | 0.9521 | 0.0479 | 0.0521 | 17969 | 1977 | 54  | 18131 | 1823 | 46  | 205.17 | 239.23 |
| 20000 | 0.90 | 0.95 | 0.05 | 16245 | 1900 | 50  | 0.50 | 0.9479 | 0.9521 | 0.0479 | 0.0521 | 17969 | 1977 | 54  | 18131 | 1823 | 46  | 168.72 | 199.87 |
| 20000 | 0.91 | 0.95 | 0.05 | 16426 | 1900 | 50  | 0.40 | 0.9479 | 0.9521 | 0.0479 | 0.0521 | 17969 | 1977 | 54  | 18131 | 1823 | 46  | 135.90 | 164.11 |
| 20000 | 0.92 | 0.95 | 0.05 | 16606 | 1900 | 50  | 0.31 | 0.9479 | 0.9521 | 0.0479 | 0.0521 | 17969 | 1977 | 54  | 18131 | 1823 | 46  | 106.70 | 131.95 |
| 20000 | 0.93 | 0.95 | 0.05 | 16787 | 1900 | 50  | 0.24 | 0.9479 | 0.9521 | 0.0479 | 0.0521 | 17969 | 1977 | 54  | 18131 | 1823 | 46  | 81.14  | 103.38 |
| 20000 | 0.94 | 0.95 | 0.05 | 16967 | 1900 | 50  | 0.17 | 0.9479 | 0.9521 | 0.0479 | 0.0521 | 17969 | 1977 | 54  | 18131 | 1823 | 46  | 59.19  | 78.40  |
| 20000 | 0.95 | 0.95 | 0.05 | 17148 | 1900 | 50  | 0.12 | 0.9479 | 0.9521 | 0.0479 | 0.0521 | 17969 | 1977 | 54  | 18131 | 1823 | 46  | 40.88  | 57.02  |
| 20000 | 0.96 | 0.95 | 0.05 | 17328 | 1900 | 50  | 0.08 | 0.9479 | 0.9521 | 0.0479 | 0.0521 | 17969 | 1977 | 54  | 18131 | 1823 | 46  | 26.19  | 39.23  |
| 20000 | 0.97 | 0.95 | 0.05 | 17509 | 1900 | 50  | 0.04 | 0.9479 | 0.9521 | 0.0479 | 0.0521 | 17969 | 1977 | 54  | 18131 | 1823 | 46  | 15.12  | 25.03  |
| 20000 | 0.98 | 0.95 | 0.05 | 17689 | 1900 | 50  | 0.02 | 0.9479 | 0.9521 | 0.0479 | 0.0521 | 17969 | 1977 | 54  | 18131 | 1823 | 46  | 7.69   | 14.43  |
| 20000 | 0.99 | 0.95 | 0.05 | 17870 | 1900 | 50  | 0.00 | 0.9479 | 0.9521 | 0.0479 | 0.0521 | 17969 | 1977 | 54  | 18131 | 1823 | 46  | 3.88   | 7.42   |
| 20000 | 1.00 | 0.95 | 0.05 | 18050 | 1900 | 50  | 0.00 | 0.9479 | 0.9521 | 0.0479 | 0.0521 | 17969 | 1977 | 54  | 18131 | 1823 | 46  | 3.69   | 4.00   |
| 20000 | 1.01 | 0.95 | 0.05 | 18231 | 1900 | 50  | 0.00 | 0.9479 | 0.9521 | 0.0479 | 0.0521 | 17969 | 1977 | 54  | 18131 | 1823 | 46  | 7.13   | 4.18   |
| 20000 | 1.02 | 0.95 | 0.05 | 18411 | 1900 | 50  | 0.02 | 0.9479 | 0.9521 | 0.0479 | 0.0521 | 17969 | 1977 | 54  | 18131 | 1823 | 46  | 14.20  | 7.96   |
| 20000 | 1.03 | 0.95 | 0.05 | 18592 | 1900 | 50  | 0.04 | 0.9479 | 0.9521 | 0.0479 | 0.0521 | 17969 | 1977 | 54  | 18131 | 1823 | 46  | 24.90  | 15.32  |
| 20000 | 1.04 | 0.95 | 0.05 | 18772 | 1900 | 50  | 0.07 | 0.9479 | 0.9521 | 0.0479 | 0.0521 | 17969 | 1977 | 54  | 18131 | 1823 | 46  | 39.22  | 26.28  |
| 20000 | 1.05 | 0.95 | 0.05 | 18953 | 1900 | 50  | 0.11 | 0.9479 | 0.9521 | 0.0479 | 0.0521 | 17969 | 1977 | 54  | 18131 | 1823 | 46  | 57.17  | 40.84  |
| 20000 | 1.06 | 0.95 | 0.05 | 19133 | 1900 | 50  | 0.15 | 0.9479 | 0.9521 | 0.0479 | 0.0521 | 17969 | 1977 | 54  | 18131 | 1823 | 46  | 78.74  | 58.99  |
| 20000 | 1.07 | 0.95 | 0.05 | 19314 | 1900 | 50  | 0.21 | 0.9479 | 0.9521 | 0.0479 | 0.0521 | 17969 | 1977 | 54  | 18131 | 1823 | 46  | 103.94 | 80.73  |
| 20000 | 1.08 | 0.95 | 0.05 | 19494 | 1900 | 50  | 0.27 | 0.9479 | 0.9521 | 0.0479 | 0.0521 | 17969 | 1977 | 54  | 18131 | 1823 | 46  | 132.76 | 106.06 |

|       |      |      |      |       |      |    |      |        |        |        |        |       |      |    |       |      |    |        |        |
|-------|------|------|------|-------|------|----|------|--------|--------|--------|--------|-------|------|----|-------|------|----|--------|--------|
| 20000 | 1.09 | 0.95 | 0.05 | 19675 | 1900 | 50 | 0.34 | 0.9479 | 0.9521 | 0.0479 | 0.0521 | 17969 | 1977 | 54 | 18131 | 1823 | 46 | 165.22 | 134.99 |
| 20000 | 1.10 | 0.95 | 0.05 | 19855 | 1900 | 50 | 0.41 | 0.9479 | 0.9521 | 0.0479 | 0.0521 | 17969 | 1977 | 54 | 18131 | 1823 | 46 | 201.29 | 167.52 |
| 20000 | 1.11 | 0.95 | 0.05 | 20036 | 1900 | 50 | 0.49 | 0.9479 | 0.9521 | 0.0479 | 0.0521 | 17969 | 1977 | 54 | 18131 | 1823 | 46 | 241.00 | 203.63 |
| 20000 | 1.12 | 0.95 | 0.05 | 20216 | 1900 | 50 | 0.58 | 0.9479 | 0.9521 | 0.0479 | 0.0521 | 17969 | 1977 | 54 | 18131 | 1823 | 46 | 284.33 | 243.35 |
| 20000 | 1.13 | 0.95 | 0.05 | 20397 | 1900 | 50 | 0.68 | 0.9479 | 0.9521 | 0.0479 | 0.0521 | 17969 | 1977 | 54 | 18131 | 1823 | 46 | 331.29 | 286.65 |
| 20000 | 1.14 | 0.95 | 0.05 | 20577 | 1900 | 50 | 0.78 | 0.9479 | 0.9521 | 0.0479 | 0.0521 | 17969 | 1977 | 54 | 18131 | 1823 | 46 | 381.87 | 333.55 |
| 20000 | 1.15 | 0.95 | 0.05 | 20758 | 1900 | 50 | 0.88 | 0.9479 | 0.9521 | 0.0479 | 0.0521 | 17969 | 1977 | 54 | 18131 | 1823 | 46 | 436.08 | 384.04 |
| 20000 | 1.16 | 0.95 | 0.05 | 20938 | 1900 | 50 | 1.00 | 0.9479 | 0.9521 | 0.0479 | 0.0521 | 17969 | 1977 | 54 | 18131 | 1823 | 46 | 493.92 | 438.13 |
| 20000 | 1.17 | 0.95 | 0.05 | 21119 | 1900 | 50 | 1.11 | 0.9479 | 0.9521 | 0.0479 | 0.0521 | 17969 | 1977 | 54 | 18131 | 1823 | 46 | 555.38 | 495.81 |
| 20000 | 1.18 | 0.95 | 0.05 | 21299 | 1900 | 50 | 1.24 | 0.9479 | 0.9521 | 0.0479 | 0.0521 | 17969 | 1977 | 54 | 18131 | 1823 | 46 | 620.47 | 557.08 |
| 20000 | 1.19 | 0.95 | 0.05 | 21480 | 1900 | 50 | 1.37 | 0.9479 | 0.9521 | 0.0479 | 0.0521 | 17969 | 1977 | 54 | 18131 | 1823 | 46 | 689.18 | 621.95 |
| 20000 | 1.20 | 0.95 | 0.05 | 21660 | 1900 | 50 | 1.50 | 0.9479 | 0.9521 | 0.0479 | 0.0521 | 17969 | 1977 | 54 | 18131 | 1823 | 46 | 761.53 | 690.41 |
| 20000 | 0.80 | 1    | 0    | 16000 | 0    | 0  | 1.50 | 1.0000 | 1.0000 | 0.0000 | 0.0000 | 20000 | 0    | 0  | 20000 | 0    | 0  | .      | .      |
| 20000 | 0.81 | 1    | 0    | 16200 | 0    | 0  | 1.50 | 1.0000 | 1.0000 | 0.0000 | 0.0000 | 20000 | 0    | 0  | 20000 | 0    | 0  | .      | .      |
| 20000 | 0.82 | 1    | 0    | 16400 | 0    | 0  | 1.50 | 1.0000 | 1.0000 | 0.0000 | 0.0000 | 20000 | 0    | 0  | 20000 | 0    | 0  | .      | .      |
| 20000 | 0.83 | 1    | 0    | 16600 | 0    | 0  | 1.50 | 1.0000 | 1.0000 | 0.0000 | 0.0000 | 20000 | 0    | 0  | 20000 | 0    | 0  | .      | .      |
| 20000 | 0.84 | 1    | 0    | 16800 | 0    | 0  | 1.50 | 1.0000 | 1.0000 | 0.0000 | 0.0000 | 20000 | 0    | 0  | 20000 | 0    | 0  | .      | .      |
| 20000 | 0.85 | 1    | 0    | 17000 | 0    | 0  | 1.50 | 1.0000 | 1.0000 | 0.0000 | 0.0000 | 20000 | 0    | 0  | 20000 | 0    | 0  | .      | .      |
| 20000 | 0.86 | 1    | 0    | 17200 | 0    | 0  | 1.50 | 1.0000 | 1.0000 | 0.0000 | 0.0000 | 20000 | 0    | 0  | 20000 | 0    | 0  | .      | .      |
| 20000 | 0.87 | 1    | 0    | 17400 | 0    | 0  | 1.50 | 1.0000 | 1.0000 | 0.0000 | 0.0000 | 20000 | 0    | 0  | 20000 | 0    | 0  | .      | .      |
| 20000 | 0.88 | 1    | 0    | 17600 | 0    | 0  | 1.50 | 1.0000 | 1.0000 | 0.0000 | 0.0000 | 20000 | 0    | 0  | 20000 | 0    | 0  | .      | .      |
| 20000 | 0.89 | 1    | 0    | 17800 | 0    | 0  | 1.50 | 1.0000 | 1.0000 | 0.0000 | 0.0000 | 20000 | 0    | 0  | 20000 | 0    | 0  | .      | .      |
| 20000 | 0.90 | 1    | 0    | 18000 | 0    | 0  | 1.50 | 1.0000 | 1.0000 | 0.0000 | 0.0000 | 20000 | 0    | 0  | 20000 | 0    | 0  | .      | .      |
| 20000 | 0.91 | 1    | 0    | 18200 | 0    | 0  | 1.50 | 1.0000 | 1.0000 | 0.0000 | 0.0000 | 20000 | 0    | 0  | 20000 | 0    | 0  | .      | .      |
| 20000 | 0.92 | 1    | 0    | 18400 | 0    | 0  | 1.50 | 1.0000 | 1.0000 | 0.0000 | 0.0000 | 20000 | 0    | 0  | 20000 | 0    | 0  | .      | .      |
| 20000 | 0.93 | 1    | 0    | 18600 | 0    | 0  | 1.50 | 1.0000 | 1.0000 | 0.0000 | 0.0000 | 20000 | 0    | 0  | 20000 | 0    | 0  | .      | .      |
| 20000 | 0.94 | 1    | 0    | 18800 | 0    | 0  | 1.50 | 1.0000 | 1.0000 | 0.0000 | 0.0000 | 20000 | 0    | 0  | 20000 | 0    | 0  | .      | .      |
| 20000 | 0.95 | 1    | 0    | 19000 | 0    | 0  | 1.50 | 1.0000 | 1.0000 | 0.0000 | 0.0000 | 20000 | 0    | 0  | 20000 | 0    | 0  | .      | .      |
| 20000 | 0.96 | 1    | 0    | 19200 | 0    | 0  | 1.50 | 1.0000 | 1.0000 | 0.0000 | 0.0000 | 20000 | 0    | 0  | 20000 | 0    | 0  | .      | .      |
| 20000 | 0.97 | 1    | 0    | 19400 | 0    | 0  | 1.50 | 1.0000 | 1.0000 | 0.0000 | 0.0000 | 20000 | 0    | 0  | 20000 | 0    | 0  | .      | .      |
| 20000 | 0.98 | 1    | 0    | 19600 | 0    | 0  | 1.50 | 1.0000 | 1.0000 | 0.0000 | 0.0000 | 20000 | 0    | 0  | 20000 | 0    | 0  | .      | .      |
| 20000 | 0.99 | 1    | 0    | 19800 | 0    | 0  | 1.50 | 1.0000 | 1.0000 | 0.0000 | 0.0000 | 20000 | 0    | 0  | 20000 | 0    | 0  | .      | .      |
| 20000 | 1.00 | 1    | 0    | 20000 | 0    | 0  | 1.50 | 1.0000 | 1.0000 | 0.0000 | 0.0000 | 20000 | 0    | 0  | 20000 | 0    | 0  | .      | .      |
| 20000 | 1.01 | 1    | 0    | 20200 | 0    | 0  | 1.50 | 1.0000 | 1.0000 | 0.0000 | 0.0000 | 20000 | 0    | 0  | 20000 | 0    | 0  | .      | .      |
| 20000 | 1.02 | 1    | 0    | 20400 | 0    | 0  | 1.50 | 1.0000 | 1.0000 | 0.0000 | 0.0000 | 20000 | 0    | 0  | 20000 | 0    | 0  | .      | .      |

|       |      |      |      |       |      |       |      |        |        |        |        |       |      |       |       |      |       |      |       |
|-------|------|------|------|-------|------|-------|------|--------|--------|--------|--------|-------|------|-------|-------|------|-------|------|-------|
| 20000 | 1.03 | 1    | 0    | 20600 | 0    | 0     | 1.50 | 1.0000 | 1.0000 | 0.0000 | 0.0000 | 20000 | 0    | 0     | 20000 | 0    | 0     | .    | .     |
| 20000 | 1.04 | 1    | 0    | 20800 | 0    | 0     | 1.50 | 1.0000 | 1.0000 | 0.0000 | 0.0000 | 20000 | 0    | 0     | 20000 | 0    | 0     | .    | .     |
| 20000 | 1.05 | 1    | 0    | 21000 | 0    | 0     | 1.50 | 1.0000 | 1.0000 | 0.0000 | 0.0000 | 20000 | 0    | 0     | 20000 | 0    | 0     | .    | .     |
| 20000 | 1.06 | 1    | 0    | 21200 | 0    | 0     | 1.50 | 1.0000 | 1.0000 | 0.0000 | 0.0000 | 20000 | 0    | 0     | 20000 | 0    | 0     | .    | .     |
| 20000 | 1.07 | 1    | 0    | 21400 | 0    | 0     | 1.50 | 1.0000 | 1.0000 | 0.0000 | 0.0000 | 20000 | 0    | 0     | 20000 | 0    | 0     | .    | .     |
| 20000 | 1.08 | 1    | 0    | 21600 | 0    | 0     | 1.50 | 1.0000 | 1.0000 | 0.0000 | 0.0000 | 20000 | 0    | 0     | 20000 | 0    | 0     | .    | .     |
| 20000 | 1.09 | 1    | 0    | 21800 | 0    | 0     | 1.50 | 1.0000 | 1.0000 | 0.0000 | 0.0000 | 20000 | 0    | 0     | 20000 | 0    | 0     | .    | .     |
| 20000 | 1.10 | 1    | 0    | 22000 | 0    | 0     | 1.50 | 1.0000 | 1.0000 | 0.0000 | 0.0000 | 20000 | 0    | 0     | 20000 | 0    | 0     | .    | .     |
| 20000 | 1.11 | 1    | 0    | 22200 | 0    | 0     | 1.50 | 1.0000 | 1.0000 | 0.0000 | 0.0000 | 20000 | 0    | 0     | 20000 | 0    | 0     | .    | .     |
| 20000 | 1.12 | 1    | 0    | 22400 | 0    | 0     | 1.50 | 1.0000 | 1.0000 | 0.0000 | 0.0000 | 20000 | 0    | 0     | 20000 | 0    | 0     | .    | .     |
| 20000 | 1.13 | 1    | 0    | 22600 | 0    | 0     | 1.50 | 1.0000 | 1.0000 | 0.0000 | 0.0000 | 20000 | 0    | 0     | 20000 | 0    | 0     | .    | .     |
| 20000 | 1.14 | 1    | 0    | 22800 | 0    | 0     | 1.50 | 1.0000 | 1.0000 | 0.0000 | 0.0000 | 20000 | 0    | 0     | 20000 | 0    | 0     | .    | .     |
| 20000 | 1.15 | 1    | 0    | 23000 | 0    | 0     | 1.50 | 1.0000 | 1.0000 | 0.0000 | 0.0000 | 20000 | 0    | 0     | 20000 | 0    | 0     | .    | .     |
| 20000 | 1.16 | 1    | 0    | 23200 | 0    | 0     | 1.50 | 1.0000 | 1.0000 | 0.0000 | 0.0000 | 20000 | 0    | 0     | 20000 | 0    | 0     | .    | .     |
| 20000 | 1.17 | 1    | 0    | 23400 | 0    | 0     | 1.50 | 1.0000 | 1.0000 | 0.0000 | 0.0000 | 20000 | 0    | 0     | 20000 | 0    | 0     | .    | .     |
| 20000 | 1.18 | 1    | 0    | 23600 | 0    | 0     | 1.50 | 1.0000 | 1.0000 | 0.0000 | 0.0000 | 20000 | 0    | 0     | 20000 | 0    | 0     | .    | .     |
| 20000 | 1.19 | 1    | 0    | 23800 | 0    | 0     | 1.50 | 1.0000 | 1.0000 | 0.0000 | 0.0000 | 20000 | 0    | 0     | 20000 | 0    | 0     | .    | .     |
| 20000 | 1.20 | 1    | 0    | 24000 | 0    | 0     | 1.50 | 1.0000 | 1.0000 | 0.0000 | 0.0000 | 20000 | 0    | 0     | 20000 | 0    | 0     | .    | .     |
| 50000 | 0.80 | 0.05 | 0.95 | 100   | 4750 | 45125 | 4.60 | 0.0486 | 0.0514 | 0.9486 | 0.9514 | 118   | 4628 | 45253 | 132   | 4871 | 44997 | 6.41 | 11.08 |
| 50000 | 0.81 | 0.05 | 0.95 | 101   | 4750 | 45125 | 4.15 | 0.0486 | 0.0514 | 0.9486 | 0.9514 | 118   | 4628 | 45253 | 132   | 4871 | 44997 | 6.03 | 10.49 |
| 50000 | 0.82 | 0.05 | 0.95 | 103   | 4750 | 45125 | 3.72 | 0.0486 | 0.0514 | 0.9486 | 0.9514 | 118   | 4628 | 45253 | 132   | 4871 | 44997 | 5.69 | 9.92  |
| 50000 | 0.83 | 0.05 | 0.95 | 104   | 4750 | 45125 | 3.32 | 0.0486 | 0.0514 | 0.9486 | 0.9514 | 118   | 4628 | 45253 | 132   | 4871 | 44997 | 5.37 | 9.38  |
| 50000 | 0.84 | 0.05 | 0.95 | 105   | 4750 | 45125 | 2.93 | 0.0486 | 0.0514 | 0.9486 | 0.9514 | 118   | 4628 | 45253 | 132   | 4871 | 44997 | 5.07 | 8.86  |
| 50000 | 0.85 | 0.05 | 0.95 | 106   | 4750 | 45125 | 2.58 | 0.0486 | 0.0514 | 0.9486 | 0.9514 | 118   | 4628 | 45253 | 132   | 4871 | 44997 | 4.80 | 8.36  |
| 50000 | 0.86 | 0.05 | 0.95 | 108   | 4750 | 45125 | 2.24 | 0.0486 | 0.0514 | 0.9486 | 0.9514 | 118   | 4628 | 45253 | 132   | 4871 | 44997 | 4.56 | 7.89  |
| 50000 | 0.87 | 0.05 | 0.95 | 109   | 4750 | 45125 | 1.93 | 0.0486 | 0.0514 | 0.9486 | 0.9514 | 118   | 4628 | 45253 | 132   | 4871 | 44997 | 4.34 | 7.44  |
| 50000 | 0.88 | 0.05 | 0.95 | 110   | 4750 | 45125 | 1.64 | 0.0486 | 0.0514 | 0.9486 | 0.9514 | 118   | 4628 | 45253 | 132   | 4871 | 44997 | 4.15 | 7.01  |
| 50000 | 0.89 | 0.05 | 0.95 | 111   | 4750 | 45125 | 1.38 | 0.0486 | 0.0514 | 0.9486 | 0.9514 | 118   | 4628 | 45253 | 132   | 4871 | 44997 | 3.99 | 6.61  |
| 50000 | 0.90 | 0.05 | 0.95 | 113   | 4750 | 45125 | 1.14 | 0.0486 | 0.0514 | 0.9486 | 0.9514 | 118   | 4628 | 45253 | 132   | 4871 | 44997 | 3.86 | 6.23  |
| 50000 | 0.91 | 0.05 | 0.95 | 114   | 4750 | 45125 | 0.92 | 0.0486 | 0.0514 | 0.9486 | 0.9514 | 118   | 4628 | 45253 | 132   | 4871 | 44997 | 3.75 | 5.87  |
| 50000 | 0.92 | 0.05 | 0.95 | 115   | 4750 | 45125 | 0.73 | 0.0486 | 0.0514 | 0.9486 | 0.9514 | 118   | 4628 | 45253 | 132   | 4871 | 44997 | 3.66 | 5.54  |
| 50000 | 0.93 | 0.05 | 0.95 | 116   | 4750 | 45125 | 0.56 | 0.0486 | 0.0514 | 0.9486 | 0.9514 | 118   | 4628 | 45253 | 132   | 4871 | 44997 | 3.60 | 5.24  |
| 50000 | 0.94 | 0.05 | 0.95 | 118   | 4750 | 45125 | 0.41 | 0.0486 | 0.0514 | 0.9486 | 0.9514 | 118   | 4628 | 45253 | 132   | 4871 | 44997 | 3.57 | 4.95  |
| 50000 | 0.95 | 0.05 | 0.95 | 119   | 4750 | 45125 | 0.28 | 0.0486 | 0.0514 | 0.9486 | 0.9514 | 118   | 4628 | 45253 | 132   | 4871 | 44997 | 3.57 | 4.69  |
| 50000 | 0.96 | 0.05 | 0.95 | 120   | 4750 | 45125 | 0.18 | 0.0486 | 0.0514 | 0.9486 | 0.9514 | 118   | 4628 | 45253 | 132   | 4871 | 44997 | 3.59 | 4.45  |

|       |      |      |      |     |      |       |       |        |        |        |        |     |      |       |     |      |       |       |       |
|-------|------|------|------|-----|------|-------|-------|--------|--------|--------|--------|-----|------|-------|-----|------|-------|-------|-------|
| 50000 | 0.97 | 0.05 | 0.95 | 121 | 4750 | 45125 | 0.10  | 0.0486 | 0.0514 | 0.9486 | 0.9514 | 118 | 4628 | 45253 | 132 | 4871 | 44997 | 3.64  | 4.24  |
| 50000 | 0.98 | 0.05 | 0.95 | 123 | 4750 | 45125 | 0.05  | 0.0486 | 0.0514 | 0.9486 | 0.9514 | 118 | 4628 | 45253 | 132 | 4871 | 44997 | 3.71  | 4.05  |
| 50000 | 0.99 | 0.05 | 0.95 | 124 | 4750 | 45125 | 0.01  | 0.0486 | 0.0514 | 0.9486 | 0.9514 | 118 | 4628 | 45253 | 132 | 4871 | 44997 | 3.82  | 3.89  |
| 50000 | 1.00 | 0.05 | 0.95 | 125 | 4750 | 45125 | 0.00  | 0.0486 | 0.0514 | 0.9486 | 0.9514 | 118 | 4628 | 45253 | 132 | 4871 | 44997 | 3.94  | 3.75  |
| 50000 | 1.01 | 0.05 | 0.95 | 126 | 4750 | 45125 | 0.01  | 0.0486 | 0.0514 | 0.9486 | 0.9514 | 118 | 4628 | 45253 | 132 | 4871 | 44997 | 4.10  | 3.63  |
| 50000 | 1.02 | 0.05 | 0.95 | 128 | 4750 | 45125 | 0.05  | 0.0486 | 0.0514 | 0.9486 | 0.9514 | 118 | 4628 | 45253 | 132 | 4871 | 44997 | 4.28  | 3.53  |
| 50000 | 1.03 | 0.05 | 0.95 | 129 | 4750 | 45125 | 0.10  | 0.0486 | 0.0514 | 0.9486 | 0.9514 | 118 | 4628 | 45253 | 132 | 4871 | 44997 | 4.48  | 3.46  |
| 50000 | 1.04 | 0.05 | 0.95 | 130 | 4750 | 45125 | 0.18  | 0.0486 | 0.0514 | 0.9486 | 0.9514 | 118 | 4628 | 45253 | 132 | 4871 | 44997 | 4.72  | 3.42  |
| 50000 | 1.05 | 0.05 | 0.95 | 131 | 4750 | 45125 | 0.28  | 0.0486 | 0.0514 | 0.9486 | 0.9514 | 118 | 4628 | 45253 | 132 | 4871 | 44997 | 4.98  | 3.39  |
| 50000 | 1.06 | 0.05 | 0.95 | 133 | 4750 | 45125 | 0.40  | 0.0486 | 0.0514 | 0.9486 | 0.9514 | 118 | 4628 | 45253 | 132 | 4871 | 44997 | 5.26  | 3.39  |
| 50000 | 1.07 | 0.05 | 0.95 | 134 | 4750 | 45125 | 0.55  | 0.0486 | 0.0514 | 0.9486 | 0.9514 | 118 | 4628 | 45253 | 132 | 4871 | 44997 | 5.58  | 3.42  |
| 50000 | 1.08 | 0.05 | 0.95 | 135 | 4750 | 45125 | 0.72  | 0.0486 | 0.0514 | 0.9486 | 0.9514 | 118 | 4628 | 45253 | 132 | 4871 | 44997 | 5.91  | 3.47  |
| 50000 | 1.09 | 0.05 | 0.95 | 136 | 4750 | 45125 | 0.91  | 0.0486 | 0.0514 | 0.9486 | 0.9514 | 118 | 4628 | 45253 | 132 | 4871 | 44997 | 6.28  | 3.54  |
| 50000 | 1.10 | 0.05 | 0.95 | 138 | 4750 | 45125 | 1.12  | 0.0486 | 0.0514 | 0.9486 | 0.9514 | 118 | 4628 | 45253 | 132 | 4871 | 44997 | 6.67  | 3.63  |
| 50000 | 1.11 | 0.05 | 0.95 | 139 | 4750 | 45125 | 1.35  | 0.0486 | 0.0514 | 0.9486 | 0.9514 | 118 | 4628 | 45253 | 132 | 4871 | 44997 | 7.09  | 3.75  |
| 50000 | 1.12 | 0.05 | 0.95 | 140 | 4750 | 45125 | 1.61  | 0.0486 | 0.0514 | 0.9486 | 0.9514 | 118 | 4628 | 45253 | 132 | 4871 | 44997 | 7.53  | 3.89  |
| 50000 | 1.13 | 0.05 | 0.95 | 141 | 4750 | 45125 | 1.88  | 0.0486 | 0.0514 | 0.9486 | 0.9514 | 118 | 4628 | 45253 | 132 | 4871 | 44997 | 8.00  | 4.06  |
| 50000 | 1.14 | 0.05 | 0.95 | 143 | 4750 | 45125 | 2.18  | 0.0486 | 0.0514 | 0.9486 | 0.9514 | 118 | 4628 | 45253 | 132 | 4871 | 44997 | 8.50  | 4.25  |
| 50000 | 1.15 | 0.05 | 0.95 | 144 | 4750 | 45125 | 2.50  | 0.0486 | 0.0514 | 0.9486 | 0.9514 | 118 | 4628 | 45253 | 132 | 4871 | 44997 | 9.03  | 4.47  |
| 50000 | 1.16 | 0.05 | 0.95 | 145 | 4750 | 45125 | 2.84  | 0.0486 | 0.0514 | 0.9486 | 0.9514 | 118 | 4628 | 45253 | 132 | 4871 | 44997 | 9.58  | 4.70  |
| 50000 | 1.17 | 0.05 | 0.95 | 146 | 4750 | 45125 | 3.21  | 0.0486 | 0.0514 | 0.9486 | 0.9514 | 118 | 4628 | 45253 | 132 | 4871 | 44997 | 10.15 | 4.96  |
| 50000 | 1.18 | 0.05 | 0.95 | 148 | 4750 | 45125 | 3.59  | 0.0486 | 0.0514 | 0.9486 | 0.9514 | 118 | 4628 | 45253 | 132 | 4871 | 44997 | 10.75 | 5.25  |
| 50000 | 1.19 | 0.05 | 0.95 | 149 | 4750 | 45125 | 4.00  | 0.0486 | 0.0514 | 0.9486 | 0.9514 | 118 | 4628 | 45253 | 132 | 4871 | 44997 | 11.38 | 5.56  |
| 50000 | 1.20 | 0.05 | 0.95 | 150 | 4750 | 45125 | 4.43  | 0.0486 | 0.0514 | 0.9486 | 0.9514 | 118 | 4628 | 45253 | 132 | 4871 | 44997 | 12.04 | 5.89  |
| 50000 | 0.80 | 0.1  | 0.9  | 400 | 9000 | 40500 | 16.83 | 0.0981 | 0.1019 | 0.8981 | 0.9019 | 482 | 8851 | 40668 | 519 | 9148 | 40333 | 17.02 | 30.29 |
| 50000 | 0.81 | 0.1  | 0.9  | 405 | 9000 | 40500 | 15.16 | 0.0981 | 0.1019 | 0.8981 | 0.9019 | 482 | 8851 | 40668 | 519 | 9148 | 40333 | 15.38 | 28.05 |
| 50000 | 0.82 | 0.1  | 0.9  | 410 | 9000 | 40500 | 13.58 | 0.0981 | 0.1019 | 0.8981 | 0.9019 | 482 | 8851 | 40668 | 519 | 9148 | 40333 | 13.84 | 25.91 |
| 50000 | 0.83 | 0.1  | 0.9  | 415 | 9000 | 40500 | 12.09 | 0.0981 | 0.1019 | 0.8981 | 0.9019 | 482 | 8851 | 40668 | 519 | 9148 | 40333 | 12.41 | 23.86 |
| 50000 | 0.84 | 0.1  | 0.9  | 420 | 9000 | 40500 | 10.69 | 0.0981 | 0.1019 | 0.8981 | 0.9019 | 482 | 8851 | 40668 | 519 | 9148 | 40333 | 11.08 | 21.90 |
| 50000 | 0.85 | 0.1  | 0.9  | 425 | 9000 | 40500 | 9.38  | 0.0981 | 0.1019 | 0.8981 | 0.9019 | 482 | 8851 | 40668 | 519 | 9148 | 40333 | 9.85  | 20.05 |
| 50000 | 0.86 | 0.1  | 0.9  | 430 | 9000 | 40500 | 8.15  | 0.0981 | 0.1019 | 0.8981 | 0.9019 | 482 | 8851 | 40668 | 519 | 9148 | 40333 | 8.73  | 18.29 |
| 50000 | 0.87 | 0.1  | 0.9  | 435 | 9000 | 40500 | 7.02  | 0.0981 | 0.1019 | 0.8981 | 0.9019 | 482 | 8851 | 40668 | 519 | 9148 | 40333 | 7.71  | 16.63 |
| 50000 | 0.88 | 0.1  | 0.9  | 440 | 9000 | 40500 | 5.97  | 0.0981 | 0.1019 | 0.8981 | 0.9019 | 482 | 8851 | 40668 | 519 | 9148 | 40333 | 6.79  | 15.06 |
| 50000 | 0.89 | 0.1  | 0.9  | 445 | 9000 | 40500 | 5.00  | 0.0981 | 0.1019 | 0.8981 | 0.9019 | 482 | 8851 | 40668 | 519 | 9148 | 40333 | 5.98  | 13.59 |
| 50000 | 0.90 | 0.1  | 0.9  | 450 | 9000 | 40500 | 4.13  | 0.0981 | 0.1019 | 0.8981 | 0.9019 | 482 | 8851 | 40668 | 519 | 9148 | 40333 | 5.27  | 12.22 |



|       |      |      |      |     |       |       |       |        |        |        |        |      |       |       |      |       |       |       |       |
|-------|------|------|------|-----|-------|-------|-------|--------|--------|--------|--------|------|-------|-------|------|-------|-------|-------|-------|
| 50000 | 0.91 | 0.1  | 0.9  | 455 | 9000  | 40500 | 3.34  | 0.0981 | 0.1019 | 0.8981 | 0.9019 | 482  | 8851  | 40668 | 519  | 9148  | 40333 | 4.67  | 10.94 |
| 50000 | 0.92 | 0.1  | 0.9  | 460 | 9000  | 40500 | 2.63  | 0.0981 | 0.1019 | 0.8981 | 0.9019 | 482  | 8851  | 40668 | 519  | 9148  | 40333 | 4.17  | 9.76  |
| 50000 | 0.93 | 0.1  | 0.9  | 465 | 9000  | 40500 | 2.01  | 0.0981 | 0.1019 | 0.8981 | 0.9019 | 482  | 8851  | 40668 | 519  | 9148  | 40333 | 3.77  | 8.67  |
| 50000 | 0.94 | 0.1  | 0.9  | 470 | 9000  | 40500 | 1.47  | 0.0981 | 0.1019 | 0.8981 | 0.9019 | 482  | 8851  | 40668 | 519  | 9148  | 40333 | 3.48  | 7.68  |
| 50000 | 0.95 | 0.1  | 0.9  | 475 | 9000  | 40500 | 1.02  | 0.0981 | 0.1019 | 0.8981 | 0.9019 | 482  | 8851  | 40668 | 519  | 9148  | 40333 | 3.29  | 6.79  |
| 50000 | 0.96 | 0.1  | 0.9  | 480 | 9000  | 40500 | 0.65  | 0.0981 | 0.1019 | 0.8981 | 0.9019 | 482  | 8851  | 40668 | 519  | 9148  | 40333 | 3.21  | 6.00  |
| 50000 | 0.97 | 0.1  | 0.9  | 485 | 9000  | 40500 | 0.37  | 0.0981 | 0.1019 | 0.8981 | 0.9019 | 482  | 8851  | 40668 | 519  | 9148  | 40333 | 3.23  | 5.30  |
| 50000 | 0.98 | 0.1  | 0.9  | 490 | 9000  | 40500 | 0.16  | 0.0981 | 0.1019 | 0.8981 | 0.9019 | 482  | 8851  | 40668 | 519  | 9148  | 40333 | 3.35  | 4.70  |
| 50000 | 0.99 | 0.1  | 0.9  | 495 | 9000  | 40500 | 0.04  | 0.0981 | 0.1019 | 0.8981 | 0.9019 | 482  | 8851  | 40668 | 519  | 9148  | 40333 | 3.58  | 4.19  |
| 50000 | 1.00 | 0.1  | 0.9  | 500 | 9000  | 40500 | 0.00  | 0.0981 | 0.1019 | 0.8981 | 0.9019 | 482  | 8851  | 40668 | 519  | 9148  | 40333 | 3.91  | 3.78  |
| 50000 | 1.01 | 0.1  | 0.9  | 505 | 9000  | 40500 | 0.04  | 0.0981 | 0.1019 | 0.8981 | 0.9019 | 482  | 8851  | 40668 | 519  | 9148  | 40333 | 4.34  | 3.47  |
| 50000 | 1.02 | 0.1  | 0.9  | 510 | 9000  | 40500 | 0.16  | 0.0981 | 0.1019 | 0.8981 | 0.9019 | 482  | 8851  | 40668 | 519  | 9148  | 40333 | 4.88  | 3.25  |
| 50000 | 1.03 | 0.1  | 0.9  | 515 | 9000  | 40500 | 0.36  | 0.0981 | 0.1019 | 0.8981 | 0.9019 | 482  | 8851  | 40668 | 519  | 9148  | 40333 | 5.52  | 3.13  |
| 50000 | 1.04 | 0.1  | 0.9  | 520 | 9000  | 40500 | 0.64  | 0.0981 | 0.1019 | 0.8981 | 0.9019 | 482  | 8851  | 40668 | 519  | 9148  | 40333 | 6.27  | 3.10  |
| 50000 | 1.05 | 0.1  | 0.9  | 525 | 9000  | 40500 | 1.00  | 0.0981 | 0.1019 | 0.8981 | 0.9019 | 482  | 8851  | 40668 | 519  | 9148  | 40333 | 7.12  | 3.18  |
| 50000 | 1.06 | 0.1  | 0.9  | 530 | 9000  | 40500 | 1.44  | 0.0981 | 0.1019 | 0.8981 | 0.9019 | 482  | 8851  | 40668 | 519  | 9148  | 40333 | 8.07  | 3.34  |
| 50000 | 1.07 | 0.1  | 0.9  | 535 | 9000  | 40500 | 1.96  | 0.0981 | 0.1019 | 0.8981 | 0.9019 | 482  | 8851  | 40668 | 519  | 9148  | 40333 | 9.13  | 3.61  |
| 50000 | 1.08 | 0.1  | 0.9  | 540 | 9000  | 40500 | 2.55  | 0.0981 | 0.1019 | 0.8981 | 0.9019 | 482  | 8851  | 40668 | 519  | 9148  | 40333 | 10.29 | 3.97  |
| 50000 | 1.09 | 0.1  | 0.9  | 545 | 9000  | 40500 | 3.23  | 0.0981 | 0.1019 | 0.8981 | 0.9019 | 482  | 8851  | 40668 | 519  | 9148  | 40333 | 11.55 | 4.43  |
| 50000 | 1.10 | 0.1  | 0.9  | 550 | 9000  | 40500 | 3.97  | 0.0981 | 0.1019 | 0.8981 | 0.9019 | 482  | 8851  | 40668 | 519  | 9148  | 40333 | 12.92 | 4.98  |
| 50000 | 1.11 | 0.1  | 0.9  | 555 | 9000  | 40500 | 4.80  | 0.0981 | 0.1019 | 0.8981 | 0.9019 | 482  | 8851  | 40668 | 519  | 9148  | 40333 | 14.40 | 5.63  |
| 50000 | 1.12 | 0.1  | 0.9  | 560 | 9000  | 40500 | 5.70  | 0.0981 | 0.1019 | 0.8981 | 0.9019 | 482  | 8851  | 40668 | 519  | 9148  | 40333 | 15.97 | 6.38  |
| 50000 | 1.13 | 0.1  | 0.9  | 565 | 9000  | 40500 | 6.68  | 0.0981 | 0.1019 | 0.8981 | 0.9019 | 482  | 8851  | 40668 | 519  | 9148  | 40333 | 17.65 | 7.22  |
| 50000 | 1.14 | 0.1  | 0.9  | 570 | 9000  | 40500 | 7.73  | 0.0981 | 0.1019 | 0.8981 | 0.9019 | 482  | 8851  | 40668 | 519  | 9148  | 40333 | 19.44 | 8.16  |
| 50000 | 1.15 | 0.1  | 0.9  | 575 | 9000  | 40500 | 8.86  | 0.0981 | 0.1019 | 0.8981 | 0.9019 | 482  | 8851  | 40668 | 519  | 9148  | 40333 | 21.32 | 9.20  |
| 50000 | 1.16 | 0.1  | 0.9  | 580 | 9000  | 40500 | 10.06 | 0.0981 | 0.1019 | 0.8981 | 0.9019 | 482  | 8851  | 40668 | 519  | 9148  | 40333 | 23.32 | 10.33 |
| 50000 | 1.17 | 0.1  | 0.9  | 585 | 9000  | 40500 | 11.34 | 0.0981 | 0.1019 | 0.8981 | 0.9019 | 482  | 8851  | 40668 | 519  | 9148  | 40333 | 25.41 | 11.56 |
| 50000 | 1.18 | 0.1  | 0.9  | 590 | 9000  | 40500 | 12.68 | 0.0981 | 0.1019 | 0.8981 | 0.9019 | 482  | 8851  | 40668 | 519  | 9148  | 40333 | 27.61 | 12.88 |
| 50000 | 1.19 | 0.1  | 0.9  | 595 | 9000  | 40500 | 14.11 | 0.0981 | 0.1019 | 0.8981 | 0.9019 | 482  | 8851  | 40668 | 519  | 9148  | 40333 | 29.91 | 14.30 |
| 50000 | 1.20 | 0.1  | 0.9  | 600 | 9000  | 40500 | 15.60 | 0.0981 | 0.1019 | 0.8981 | 0.9019 | 482  | 8851  | 40668 | 519  | 9148  | 40333 | 32.32 | 15.82 |
| 50000 | 0.80 | 0.15 | 0.85 | 900 | 12750 | 36125 | 34.40 | 0.1478 | 0.1522 | 0.8478 | 0.8522 | 1092 | 12595 | 36313 | 1158 | 12904 | 35937 | 36.67 | 60.49 |
| 50000 | 0.81 | 0.15 | 0.85 | 911 | 12750 | 36125 | 30.96 | 0.1478 | 0.1522 | 0.8478 | 0.8522 | 1092 | 12595 | 36313 | 1158 | 12904 | 35937 | 32.83 | 55.58 |
| 50000 | 0.82 | 0.15 | 0.85 | 923 | 12750 | 36125 | 27.70 | 0.1478 | 0.1522 | 0.8478 | 0.8522 | 1092 | 12595 | 36313 | 1158 | 12904 | 35937 | 29.22 | 50.89 |
| 50000 | 0.83 | 0.15 | 0.85 | 934 | 12750 | 36125 | 24.64 | 0.1478 | 0.1522 | 0.8478 | 0.8522 | 1092 | 12595 | 36313 | 1158 | 12904 | 35937 | 25.84 | 46.41 |
| 50000 | 0.84 | 0.15 | 0.85 | 945 | 12750 | 36125 | 21.77 | 0.1478 | 0.1522 | 0.8478 | 0.8522 | 1092 | 12595 | 36313 | 1158 | 12904 | 35937 | 22.70 | 42.16 |

|       |      |      |      |      |       |       |       |        |        |        |        |      |       |       |      |       |       |       |       |
|-------|------|------|------|------|-------|-------|-------|--------|--------|--------|--------|------|-------|-------|------|-------|-------|-------|-------|
| 50000 | 0.85 | 0.15 | 0.85 | 956  | 12750 | 36125 | 19.08 | 0.1478 | 0.1522 | 0.8478 | 0.8522 | 1092 | 12595 | 36313 | 1158 | 12904 | 35937 | 19.78 | 38.12 |
| 50000 | 0.86 | 0.15 | 0.85 | 968  | 12750 | 36125 | 16.57 | 0.1478 | 0.1522 | 0.8478 | 0.8522 | 1092 | 12595 | 36313 | 1158 | 12904 | 35937 | 17.10 | 34.30 |
| 50000 | 0.87 | 0.15 | 0.85 | 979  | 12750 | 36125 | 14.25 | 0.1478 | 0.1522 | 0.8478 | 0.8522 | 1092 | 12595 | 36313 | 1158 | 12904 | 35937 | 14.65 | 30.70 |
| 50000 | 0.88 | 0.15 | 0.85 | 990  | 12750 | 36125 | 12.10 | 0.1478 | 0.1522 | 0.8478 | 0.8522 | 1092 | 12595 | 36313 | 1158 | 12904 | 35937 | 12.43 | 27.32 |
| 50000 | 0.89 | 0.15 | 0.85 | 1001 | 12750 | 36125 | 10.14 | 0.1478 | 0.1522 | 0.8478 | 0.8522 | 1092 | 12595 | 36313 | 1158 | 12904 | 35937 | 10.44 | 24.16 |
| 50000 | 0.90 | 0.15 | 0.85 | 1013 | 12750 | 36125 | 8.36  | 0.1478 | 0.1522 | 0.8478 | 0.8522 | 1092 | 12595 | 36313 | 1158 | 12904 | 35937 | 8.69  | 21.22 |
| 50000 | 0.91 | 0.15 | 0.85 | 1024 | 12750 | 36125 | 6.75  | 0.1478 | 0.1522 | 0.8478 | 0.8522 | 1092 | 12595 | 36313 | 1158 | 12904 | 35937 | 7.17  | 18.49 |
| 50000 | 0.92 | 0.15 | 0.85 | 1035 | 12750 | 36125 | 5.32  | 0.1478 | 0.1522 | 0.8478 | 0.8522 | 1092 | 12595 | 36313 | 1158 | 12904 | 35937 | 5.87  | 15.98 |
| 50000 | 0.93 | 0.15 | 0.85 | 1046 | 12750 | 36125 | 4.06  | 0.1478 | 0.1522 | 0.8478 | 0.8522 | 1092 | 12595 | 36313 | 1158 | 12904 | 35937 | 4.82  | 13.70 |
| 50000 | 0.94 | 0.15 | 0.85 | 1058 | 12750 | 36125 | 2.98  | 0.1478 | 0.1522 | 0.8478 | 0.8522 | 1092 | 12595 | 36313 | 1158 | 12904 | 35937 | 3.99  | 11.63 |
| 50000 | 0.95 | 0.15 | 0.85 | 1069 | 12750 | 36125 | 2.06  | 0.1478 | 0.1522 | 0.8478 | 0.8522 | 1092 | 12595 | 36313 | 1158 | 12904 | 35937 | 3.39  | 9.77  |
| 50000 | 0.96 | 0.15 | 0.85 | 1080 | 12750 | 36125 | 1.32  | 0.1478 | 0.1522 | 0.8478 | 0.8522 | 1092 | 12595 | 36313 | 1158 | 12904 | 35937 | 3.03  | 8.14  |
| 50000 | 0.97 | 0.15 | 0.85 | 1091 | 12750 | 36125 | 0.74  | 0.1478 | 0.1522 | 0.8478 | 0.8522 | 1092 | 12595 | 36313 | 1158 | 12904 | 35937 | 2.90  | 6.73  |
| 50000 | 0.98 | 0.15 | 0.85 | 1103 | 12750 | 36125 | 0.33  | 0.1478 | 0.1522 | 0.8478 | 0.8522 | 1092 | 12595 | 36313 | 1158 | 12904 | 35937 | 2.99  | 5.53  |
| 50000 | 0.99 | 0.15 | 0.85 | 1114 | 12750 | 36125 | 0.08  | 0.1478 | 0.1522 | 0.8478 | 0.8522 | 1092 | 12595 | 36313 | 1158 | 12904 | 35937 | 3.33  | 4.55  |
| 50000 | 1.00 | 0.15 | 0.85 | 1125 | 12750 | 36125 | 0.00  | 0.1478 | 0.1522 | 0.8478 | 0.8522 | 1092 | 12595 | 36313 | 1158 | 12904 | 35937 | 3.89  | 3.80  |
| 50000 | 1.01 | 0.15 | 0.85 | 1136 | 12750 | 36125 | 0.08  | 0.1478 | 0.1522 | 0.8478 | 0.8522 | 1092 | 12595 | 36313 | 1158 | 12904 | 35937 | 4.68  | 3.26  |
| 50000 | 1.02 | 0.15 | 0.85 | 1148 | 12750 | 36125 | 0.32  | 0.1478 | 0.1522 | 0.8478 | 0.8522 | 1092 | 12595 | 36313 | 1158 | 12904 | 35937 | 5.71  | 2.93  |
| 50000 | 1.03 | 0.15 | 0.85 | 1159 | 12750 | 36125 | 0.73  | 0.1478 | 0.1522 | 0.8478 | 0.8522 | 1092 | 12595 | 36313 | 1158 | 12904 | 35937 | 6.97  | 2.83  |
| 50000 | 1.04 | 0.15 | 0.85 | 1170 | 12750 | 36125 | 1.29  | 0.1478 | 0.1522 | 0.8478 | 0.8522 | 1092 | 12595 | 36313 | 1158 | 12904 | 35937 | 8.46  | 2.95  |
| 50000 | 1.05 | 0.15 | 0.85 | 1181 | 12750 | 36125 | 2.00  | 0.1478 | 0.1522 | 0.8478 | 0.8522 | 1092 | 12595 | 36313 | 1158 | 12904 | 35937 | 10.18 | 3.28  |
| 50000 | 1.06 | 0.15 | 0.85 | 1193 | 12750 | 36125 | 2.88  | 0.1478 | 0.1522 | 0.8478 | 0.8522 | 1092 | 12595 | 36313 | 1158 | 12904 | 35937 | 12.13 | 3.83  |
| 50000 | 1.07 | 0.15 | 0.85 | 1204 | 12750 | 36125 | 3.91  | 0.1478 | 0.1522 | 0.8478 | 0.8522 | 1092 | 12595 | 36313 | 1158 | 12904 | 35937 | 14.32 | 4.60  |
| 50000 | 1.08 | 0.15 | 0.85 | 1215 | 12750 | 36125 | 5.09  | 0.1478 | 0.1522 | 0.8478 | 0.8522 | 1092 | 12595 | 36313 | 1158 | 12904 | 35937 | 16.74 | 5.59  |
| 50000 | 1.09 | 0.15 | 0.85 | 1226 | 12750 | 36125 | 6.42  | 0.1478 | 0.1522 | 0.8478 | 0.8522 | 1092 | 12595 | 36313 | 1158 | 12904 | 35937 | 19.39 | 6.80  |
| 50000 | 1.10 | 0.15 | 0.85 | 1238 | 12750 | 36125 | 7.91  | 0.1478 | 0.1522 | 0.8478 | 0.8522 | 1092 | 12595 | 36313 | 1158 | 12904 | 35937 | 22.27 | 8.23  |
| 50000 | 1.11 | 0.15 | 0.85 | 1249 | 12750 | 36125 | 9.54  | 0.1478 | 0.1522 | 0.8478 | 0.8522 | 1092 | 12595 | 36313 | 1158 | 12904 | 35937 | 25.38 | 9.87  |
| 50000 | 1.12 | 0.15 | 0.85 | 1260 | 12750 | 36125 | 11.32 | 0.1478 | 0.1522 | 0.8478 | 0.8522 | 1092 | 12595 | 36313 | 1158 | 12904 | 35937 | 28.73 | 11.73 |
| 50000 | 1.13 | 0.15 | 0.85 | 1271 | 12750 | 36125 | 13.25 | 0.1478 | 0.1522 | 0.8478 | 0.8522 | 1092 | 12595 | 36313 | 1158 | 12904 | 35937 | 32.30 | 13.82 |
| 50000 | 1.14 | 0.15 | 0.85 | 1283 | 12750 | 36125 | 15.33 | 0.1478 | 0.1522 | 0.8478 | 0.8522 | 1092 | 12595 | 36313 | 1158 | 12904 | 35937 | 36.11 | 16.12 |
| 50000 | 1.15 | 0.15 | 0.85 | 1294 | 12750 | 36125 | 17.55 | 0.1478 | 0.1522 | 0.8478 | 0.8522 | 1092 | 12595 | 36313 | 1158 | 12904 | 35937 | 40.15 | 18.63 |
| 50000 | 1.16 | 0.15 | 0.85 | 1305 | 12750 | 36125 | 19.92 | 0.1478 | 0.1522 | 0.8478 | 0.8522 | 1092 | 12595 | 36313 | 1158 | 12904 | 35937 | 44.42 | 21.37 |
| 50000 | 1.17 | 0.15 | 0.85 | 1316 | 12750 | 36125 | 22.42 | 0.1478 | 0.1522 | 0.8478 | 0.8522 | 1092 | 12595 | 36313 | 1158 | 12904 | 35937 | 48.92 | 24.33 |
| 50000 | 1.18 | 0.15 | 0.85 | 1328 | 12750 | 36125 | 25.07 | 0.1478 | 0.1522 | 0.8478 | 0.8522 | 1092 | 12595 | 36313 | 1158 | 12904 | 35937 | 53.66 | 27.50 |
| 50000 | 1.19 | 0.15 | 0.85 | 1339 | 12750 | 36125 | 27.86 | 0.1478 | 0.1522 | 0.8478 | 0.8522 | 1092 | 12595 | 36313 | 1158 | 12904 | 35937 | 58.63 | 30.89 |

|       |      |      |      |      |       |       |       |        |        |        |        |      |       |       |      |       |       |       |        |
|-------|------|------|------|------|-------|-------|-------|--------|--------|--------|--------|------|-------|-------|------|-------|-------|-------|--------|
| 50000 | 1.20 | 0.15 | 0.85 | 1350 | 12750 | 36125 | 30.78 | 0.1478 | 0.1522 | 0.8478 | 0.8522 | 1092 | 12595 | 36313 | 1158 | 12904 | 35937 | 63.83 | 34.51  |
| 50000 | 0.80 | 0.2  | 0.8  | 1600 | 16000 | 32000 | 55.11 | 0.1975 | 0.2025 | 0.7975 | 0.8025 | 1951 | 15851 | 32199 | 2050 | 16148 | 31802 | 65.69 | 101.33 |
| 50000 | 0.81 | 0.2  | 0.8  | 1620 | 16000 | 32000 | 49.55 | 0.1975 | 0.2025 | 0.7975 | 0.8025 | 1951 | 15851 | 32199 | 2050 | 16148 | 31802 | 58.70 | 92.75  |
| 50000 | 0.82 | 0.2  | 0.8  | 1640 | 16000 | 32000 | 44.31 | 0.1975 | 0.2025 | 0.7975 | 0.8025 | 1951 | 15851 | 32199 | 2050 | 16148 | 31802 | 52.13 | 84.55  |
| 50000 | 0.83 | 0.2  | 0.8  | 1660 | 16000 | 32000 | 39.37 | 0.1975 | 0.2025 | 0.7975 | 0.8025 | 1951 | 15851 | 32199 | 2050 | 16148 | 31802 | 45.96 | 76.75  |
| 50000 | 0.84 | 0.2  | 0.8  | 1680 | 16000 | 32000 | 34.75 | 0.1975 | 0.2025 | 0.7975 | 0.8025 | 1951 | 15851 | 32199 | 2050 | 16148 | 31802 | 40.20 | 69.34  |
| 50000 | 0.85 | 0.2  | 0.8  | 1700 | 16000 | 32000 | 30.43 | 0.1975 | 0.2025 | 0.7975 | 0.8025 | 1951 | 15851 | 32199 | 2050 | 16148 | 31802 | 34.86 | 62.31  |
| 50000 | 0.86 | 0.2  | 0.8  | 1720 | 16000 | 32000 | 26.41 | 0.1975 | 0.2025 | 0.7975 | 0.8025 | 1951 | 15851 | 32199 | 2050 | 16148 | 31802 | 29.92 | 55.68  |
| 50000 | 0.87 | 0.2  | 0.8  | 1740 | 16000 | 32000 | 22.68 | 0.1975 | 0.2025 | 0.7975 | 0.8025 | 1951 | 15851 | 32199 | 2050 | 16148 | 31802 | 25.40 | 49.44  |
| 50000 | 0.88 | 0.2  | 0.8  | 1760 | 16000 | 32000 | 19.26 | 0.1975 | 0.2025 | 0.7975 | 0.8025 | 1951 | 15851 | 32199 | 2050 | 16148 | 31802 | 21.28 | 43.59  |
| 50000 | 0.89 | 0.2  | 0.8  | 1780 | 16000 | 32000 | 16.12 | 0.1975 | 0.2025 | 0.7975 | 0.8025 | 1951 | 15851 | 32199 | 2050 | 16148 | 31802 | 17.57 | 38.13  |
| 50000 | 0.90 | 0.2  | 0.8  | 1800 | 16000 | 32000 | 13.27 | 0.1975 | 0.2025 | 0.7975 | 0.8025 | 1951 | 15851 | 32199 | 2050 | 16148 | 31802 | 14.28 | 33.06  |
| 50000 | 0.91 | 0.2  | 0.8  | 1820 | 16000 | 32000 | 10.71 | 0.1975 | 0.2025 | 0.7975 | 0.8025 | 1951 | 15851 | 32199 | 2050 | 16148 | 31802 | 11.39 | 28.37  |
| 50000 | 0.92 | 0.2  | 0.8  | 1840 | 16000 | 32000 | 8.43  | 0.1975 | 0.2025 | 0.7975 | 0.8025 | 1951 | 15851 | 32199 | 2050 | 16148 | 31802 | 8.92  | 24.08  |
| 50000 | 0.93 | 0.2  | 0.8  | 1860 | 16000 | 32000 | 6.43  | 0.1975 | 0.2025 | 0.7975 | 0.8025 | 1951 | 15851 | 32199 | 2050 | 16148 | 31802 | 6.85  | 20.18  |
| 50000 | 0.94 | 0.2  | 0.8  | 1880 | 16000 | 32000 | 4.71  | 0.1975 | 0.2025 | 0.7975 | 0.8025 | 1951 | 15851 | 32199 | 2050 | 16148 | 31802 | 5.20  | 16.67  |
| 50000 | 0.95 | 0.2  | 0.8  | 1900 | 16000 | 32000 | 3.26  | 0.1975 | 0.2025 | 0.7975 | 0.8025 | 1951 | 15851 | 32199 | 2050 | 16148 | 31802 | 3.95  | 13.55  |
| 50000 | 0.96 | 0.2  | 0.8  | 1920 | 16000 | 32000 | 2.08  | 0.1975 | 0.2025 | 0.7975 | 0.8025 | 1951 | 15851 | 32199 | 2050 | 16148 | 31802 | 3.12  | 10.82  |
| 50000 | 0.97 | 0.2  | 0.8  | 1940 | 16000 | 32000 | 1.16  | 0.1975 | 0.2025 | 0.7975 | 0.8025 | 1951 | 15851 | 32199 | 2050 | 16148 | 31802 | 2.69  | 8.48   |
| 50000 | 0.98 | 0.2  | 0.8  | 1960 | 16000 | 32000 | 0.52  | 0.1975 | 0.2025 | 0.7975 | 0.8025 | 1951 | 15851 | 32199 | 2050 | 16148 | 31802 | 2.68  | 6.53   |
| 50000 | 0.99 | 0.2  | 0.8  | 1980 | 16000 | 32000 | 0.13  | 0.1975 | 0.2025 | 0.7975 | 0.8025 | 1951 | 15851 | 32199 | 2050 | 16148 | 31802 | 3.07  | 4.98   |
| 50000 | 1.00 | 0.2  | 0.8  | 2000 | 16000 | 32000 | 0.00  | 0.1975 | 0.2025 | 0.7975 | 0.8025 | 1951 | 15851 | 32199 | 2050 | 16148 | 31802 | 3.88  | 3.81   |
| 50000 | 1.01 | 0.2  | 0.8  | 2020 | 16000 | 32000 | 0.13  | 0.1975 | 0.2025 | 0.7975 | 0.8025 | 1951 | 15851 | 32199 | 2050 | 16148 | 31802 | 5.09  | 3.03   |
| 50000 | 1.02 | 0.2  | 0.8  | 2040 | 16000 | 32000 | 0.51  | 0.1975 | 0.2025 | 0.7975 | 0.8025 | 1951 | 15851 | 32199 | 2050 | 16148 | 31802 | 6.72  | 2.64   |
| 50000 | 1.03 | 0.2  | 0.8  | 2060 | 16000 | 32000 | 1.14  | 0.1975 | 0.2025 | 0.7975 | 0.8025 | 1951 | 15851 | 32199 | 2050 | 16148 | 31802 | 8.75  | 2.64   |
| 50000 | 1.04 | 0.2  | 0.8  | 2080 | 16000 | 32000 | 2.02  | 0.1975 | 0.2025 | 0.7975 | 0.8025 | 1951 | 15851 | 32199 | 2050 | 16148 | 31802 | 11.20 | 3.03   |
| 50000 | 1.05 | 0.2  | 0.8  | 2100 | 16000 | 32000 | 3.14  | 0.1975 | 0.2025 | 0.7975 | 0.8025 | 1951 | 15851 | 32199 | 2050 | 16148 | 31802 | 14.06 | 3.82   |
| 50000 | 1.06 | 0.2  | 0.8  | 2120 | 16000 | 32000 | 4.51  | 0.1975 | 0.2025 | 0.7975 | 0.8025 | 1951 | 15851 | 32199 | 2050 | 16148 | 31802 | 17.32 | 4.99   |
| 50000 | 1.07 | 0.2  | 0.8  | 2140 | 16000 | 32000 | 6.12  | 0.1975 | 0.2025 | 0.7975 | 0.8025 | 1951 | 15851 | 32199 | 2050 | 16148 | 31802 | 21.00 | 6.55   |
| 50000 | 1.08 | 0.2  | 0.8  | 2160 | 16000 | 32000 | 7.96  | 0.1975 | 0.2025 | 0.7975 | 0.8025 | 1951 | 15851 | 32199 | 2050 | 16148 | 31802 | 25.08 | 8.51   |
| 50000 | 1.09 | 0.2  | 0.8  | 2180 | 16000 | 32000 | 10.04 | 0.1975 | 0.2025 | 0.7975 | 0.8025 | 1951 | 15851 | 32199 | 2050 | 16148 | 31802 | 29.58 | 10.85  |
| 50000 | 1.10 | 0.2  | 0.8  | 2200 | 16000 | 32000 | 12.35 | 0.1975 | 0.2025 | 0.7975 | 0.8025 | 1951 | 15851 | 32199 | 2050 | 16148 | 31802 | 34.49 | 13.58  |
| 50000 | 1.11 | 0.2  | 0.8  | 2220 | 16000 | 32000 | 14.89 | 0.1975 | 0.2025 | 0.7975 | 0.8025 | 1951 | 15851 | 32199 | 2050 | 16148 | 31802 | 39.80 | 16.71  |
| 50000 | 1.12 | 0.2  | 0.8  | 2240 | 16000 | 32000 | 17.66 | 0.1975 | 0.2025 | 0.7975 | 0.8025 | 1951 | 15851 | 32199 | 2050 | 16148 | 31802 | 45.53 | 20.22  |
| 50000 | 1.13 | 0.2  | 0.8  | 2260 | 16000 | 32000 | 20.66 | 0.1975 | 0.2025 | 0.7975 | 0.8025 | 1951 | 15851 | 32199 | 2050 | 16148 | 31802 | 51.67 | 24.13  |

|       |      |      |      |      |       |       |       |        |        |        |        |      |       |       |      |       |       |        |        |
|-------|------|------|------|------|-------|-------|-------|--------|--------|--------|--------|------|-------|-------|------|-------|-------|--------|--------|
| 50000 | 1.14 | 0.2  | 0.8  | 2280 | 16000 | 32000 | 23.87 | 0.1975 | 0.2025 | 0.7975 | 0.8025 | 1951 | 15851 | 32199 | 2050 | 16148 | 31802 | 58.21  | 28.42  |
| 50000 | 1.15 | 0.2  | 0.8  | 2300 | 16000 | 32000 | 27.31 | 0.1975 | 0.2025 | 0.7975 | 0.8025 | 1951 | 15851 | 32199 | 2050 | 16148 | 31802 | 65.17  | 33.11  |
| 50000 | 1.16 | 0.2  | 0.8  | 2320 | 16000 | 32000 | 30.96 | 0.1975 | 0.2025 | 0.7975 | 0.8025 | 1951 | 15851 | 32199 | 2050 | 16148 | 31802 | 72.54  | 38.18  |
| 50000 | 1.17 | 0.2  | 0.8  | 2340 | 16000 | 32000 | 34.83 | 0.1975 | 0.2025 | 0.7975 | 0.8025 | 1951 | 15851 | 32199 | 2050 | 16148 | 31802 | 80.32  | 43.65  |
| 50000 | 1.18 | 0.2  | 0.8  | 2360 | 16000 | 32000 | 38.92 | 0.1975 | 0.2025 | 0.7975 | 0.8025 | 1951 | 15851 | 32199 | 2050 | 16148 | 31802 | 88.50  | 49.51  |
| 50000 | 1.19 | 0.2  | 0.8  | 2380 | 16000 | 32000 | 43.21 | 0.1975 | 0.2025 | 0.7975 | 0.8025 | 1951 | 15851 | 32199 | 2050 | 16148 | 31802 | 97.10  | 55.75  |
| 50000 | 1.20 | 0.2  | 0.8  | 2400 | 16000 | 32000 | 47.72 | 0.1975 | 0.2025 | 0.7975 | 0.8025 | 1951 | 15851 | 32199 | 2050 | 16148 | 31802 | 106.11 | 62.39  |
| 50000 | 0.80 | 0.25 | 0.75 | 2500 | 18750 | 28125 | 76.93 | 0.2473 | 0.2527 | 0.7473 | 0.7527 | 3058 | 18615 | 28327 | 3192 | 18883 | 27924 | 104.32 | 152.59 |
| 50000 | 0.81 | 0.25 | 0.75 | 2531 | 18750 | 28125 | 69.11 | 0.2473 | 0.2527 | 0.7473 | 0.7527 | 3058 | 18615 | 28327 | 3192 | 18883 | 27924 | 93.23  | 139.34 |
| 50000 | 0.82 | 0.25 | 0.75 | 2563 | 18750 | 28125 | 61.74 | 0.2473 | 0.2527 | 0.7473 | 0.7527 | 3058 | 18615 | 28327 | 3192 | 18883 | 27924 | 82.78  | 126.70 |
| 50000 | 0.83 | 0.25 | 0.75 | 2594 | 18750 | 28125 | 54.82 | 0.2473 | 0.2527 | 0.7473 | 0.7527 | 3058 | 18615 | 28327 | 3192 | 18883 | 27924 | 72.97  | 114.67 |
| 50000 | 0.84 | 0.25 | 0.75 | 2625 | 18750 | 28125 | 48.34 | 0.2473 | 0.2527 | 0.7473 | 0.7527 | 3058 | 18615 | 28327 | 3192 | 18883 | 27924 | 63.79  | 103.25 |
| 50000 | 0.85 | 0.25 | 0.75 | 2656 | 18750 | 28125 | 42.29 | 0.2473 | 0.2527 | 0.7473 | 0.7527 | 3058 | 18615 | 28327 | 3192 | 18883 | 27924 | 55.26  | 92.45  |
| 50000 | 0.86 | 0.25 | 0.75 | 2688 | 18750 | 28125 | 36.67 | 0.2473 | 0.2527 | 0.7473 | 0.7527 | 3058 | 18615 | 28327 | 3192 | 18883 | 27924 | 47.36  | 82.26  |
| 50000 | 0.87 | 0.25 | 0.75 | 2719 | 18750 | 28125 | 31.48 | 0.2473 | 0.2527 | 0.7473 | 0.7527 | 3058 | 18615 | 28327 | 3192 | 18883 | 27924 | 40.10  | 72.68  |
| 50000 | 0.88 | 0.25 | 0.75 | 2750 | 18750 | 28125 | 26.70 | 0.2473 | 0.2527 | 0.7473 | 0.7527 | 3058 | 18615 | 28327 | 3192 | 18883 | 27924 | 33.49  | 63.71  |
| 50000 | 0.89 | 0.25 | 0.75 | 2781 | 18750 | 28125 | 22.33 | 0.2473 | 0.2527 | 0.7473 | 0.7527 | 3058 | 18615 | 28327 | 3192 | 18883 | 27924 | 27.50  | 55.35  |
| 50000 | 0.90 | 0.25 | 0.75 | 2813 | 18750 | 28125 | 18.38 | 0.2473 | 0.2527 | 0.7473 | 0.7527 | 3058 | 18615 | 28327 | 3192 | 18883 | 27924 | 22.16  | 47.61  |
| 50000 | 0.91 | 0.25 | 0.75 | 2844 | 18750 | 28125 | 14.82 | 0.2473 | 0.2527 | 0.7473 | 0.7527 | 3058 | 18615 | 28327 | 3192 | 18883 | 27924 | 17.46  | 40.48  |
| 50000 | 0.92 | 0.25 | 0.75 | 2875 | 18750 | 28125 | 11.66 | 0.2473 | 0.2527 | 0.7473 | 0.7527 | 3058 | 18615 | 28327 | 3192 | 18883 | 27924 | 13.40  | 33.96  |
| 50000 | 0.93 | 0.25 | 0.75 | 2906 | 18750 | 28125 | 8.88  | 0.2473 | 0.2527 | 0.7473 | 0.7527 | 3058 | 18615 | 28327 | 3192 | 18883 | 27924 | 9.97   | 28.05  |
| 50000 | 0.94 | 0.25 | 0.75 | 2938 | 18750 | 28125 | 6.50  | 0.2473 | 0.2527 | 0.7473 | 0.7527 | 3058 | 18615 | 28327 | 3192 | 18883 | 27924 | 7.18   | 22.75  |
| 50000 | 0.95 | 0.25 | 0.75 | 2969 | 18750 | 28125 | 4.49  | 0.2473 | 0.2527 | 0.7473 | 0.7527 | 3058 | 18615 | 28327 | 3192 | 18883 | 27924 | 5.03   | 18.07  |
| 50000 | 0.96 | 0.25 | 0.75 | 3000 | 18750 | 28125 | 2.86  | 0.2473 | 0.2527 | 0.7473 | 0.7527 | 3058 | 18615 | 28327 | 3192 | 18883 | 27924 | 3.52   | 13.99  |
| 50000 | 0.97 | 0.25 | 0.75 | 3031 | 18750 | 28125 | 1.60  | 0.2473 | 0.2527 | 0.7473 | 0.7527 | 3058 | 18615 | 28327 | 3192 | 18883 | 27924 | 2.65   | 10.53  |
| 50000 | 0.98 | 0.25 | 0.75 | 3063 | 18750 | 28125 | 0.71  | 0.2473 | 0.2527 | 0.7473 | 0.7527 | 3058 | 18615 | 28327 | 3192 | 18883 | 27924 | 2.42   | 7.68   |
| 50000 | 0.99 | 0.25 | 0.75 | 3094 | 18750 | 28125 | 0.18  | 0.2473 | 0.2527 | 0.7473 | 0.7527 | 3058 | 18615 | 28327 | 3192 | 18883 | 27924 | 2.82   | 5.44   |
| 50000 | 1.00 | 0.25 | 0.75 | 3125 | 18750 | 28125 | 0.00  | 0.2473 | 0.2527 | 0.7473 | 0.7527 | 3058 | 18615 | 28327 | 3192 | 18883 | 27924 | 3.87   | 3.81   |
| 50000 | 1.01 | 0.25 | 0.75 | 3156 | 18750 | 28125 | 0.18  | 0.2473 | 0.2527 | 0.7473 | 0.7527 | 3058 | 18615 | 28327 | 3192 | 18883 | 27924 | 5.55   | 2.80   |
| 50000 | 1.02 | 0.25 | 0.75 | 3188 | 18750 | 28125 | 0.70  | 0.2473 | 0.2527 | 0.7473 | 0.7527 | 3058 | 18615 | 28327 | 3192 | 18883 | 27924 | 7.87   | 2.40   |
| 50000 | 1.03 | 0.25 | 0.75 | 3219 | 18750 | 28125 | 1.56  | 0.2473 | 0.2527 | 0.7473 | 0.7527 | 3058 | 18615 | 28327 | 3192 | 18883 | 27924 | 10.83  | 2.61   |
| 50000 | 1.04 | 0.25 | 0.75 | 3250 | 18750 | 28125 | 2.76  | 0.2473 | 0.2527 | 0.7473 | 0.7527 | 3058 | 18615 | 28327 | 3192 | 18883 | 27924 | 14.43  | 3.43   |
| 50000 | 1.05 | 0.25 | 0.75 | 3281 | 18750 | 28125 | 4.30  | 0.2473 | 0.2527 | 0.7473 | 0.7527 | 3058 | 18615 | 28327 | 3192 | 18883 | 27924 | 18.67  | 4.86   |
| 50000 | 1.06 | 0.25 | 0.75 | 3313 | 18750 | 28125 | 6.17  | 0.2473 | 0.2527 | 0.7473 | 0.7527 | 3058 | 18615 | 28327 | 3192 | 18883 | 27924 | 23.55  | 6.90   |
| 50000 | 1.07 | 0.25 | 0.75 | 3344 | 18750 | 28125 | 8.36  | 0.2473 | 0.2527 | 0.7473 | 0.7527 | 3058 | 18615 | 28327 | 3192 | 18883 | 27924 | 29.06  | 9.56   |

|       |      |      |      |      |       |       |       |        |        |        |        |      |       |       |      |       |       |        |        |
|-------|------|------|------|------|-------|-------|-------|--------|--------|--------|--------|------|-------|-------|------|-------|-------|--------|--------|
| 50000 | 1.08 | 0.25 | 0.75 | 3375 | 18750 | 28125 | 10.87 | 0.2473 | 0.2527 | 0.7473 | 0.7527 | 3058 | 18615 | 28327 | 3192 | 18883 | 27924 | 35.22  | 12.83  |
| 50000 | 1.09 | 0.25 | 0.75 | 3406 | 18750 | 28125 | 13.70 | 0.2473 | 0.2527 | 0.7473 | 0.7527 | 3058 | 18615 | 28327 | 3192 | 18883 | 27924 | 42.01  | 16.71  |
| 50000 | 1.10 | 0.25 | 0.75 | 3438 | 18750 | 28125 | 16.84 | 0.2473 | 0.2527 | 0.7473 | 0.7527 | 3058 | 18615 | 28327 | 3192 | 18883 | 27924 | 49.44  | 21.20  |
| 50000 | 1.11 | 0.25 | 0.75 | 3469 | 18750 | 28125 | 20.28 | 0.2473 | 0.2527 | 0.7473 | 0.7527 | 3058 | 18615 | 28327 | 3192 | 18883 | 27924 | 57.51  | 26.30  |
| 50000 | 1.12 | 0.25 | 0.75 | 3500 | 18750 | 28125 | 24.04 | 0.2473 | 0.2527 | 0.7473 | 0.7527 | 3058 | 18615 | 28327 | 3192 | 18883 | 27924 | 66.22  | 32.02  |
| 50000 | 1.13 | 0.25 | 0.75 | 3531 | 18750 | 28125 | 28.09 | 0.2473 | 0.2527 | 0.7473 | 0.7527 | 3058 | 18615 | 28327 | 3192 | 18883 | 27924 | 75.56  | 38.34  |
| 50000 | 1.14 | 0.25 | 0.75 | 3563 | 18750 | 28125 | 32.44 | 0.2473 | 0.2527 | 0.7473 | 0.7527 | 3058 | 18615 | 28327 | 3192 | 18883 | 27924 | 85.55  | 45.28  |
| 50000 | 1.15 | 0.25 | 0.75 | 3594 | 18750 | 28125 | 37.09 | 0.2473 | 0.2527 | 0.7473 | 0.7527 | 3058 | 18615 | 28327 | 3192 | 18883 | 27924 | 96.17  | 52.83  |
| 50000 | 1.16 | 0.25 | 0.75 | 3625 | 18750 | 28125 | 42.02 | 0.2473 | 0.2527 | 0.7473 | 0.7527 | 3058 | 18615 | 28327 | 3192 | 18883 | 27924 | 107.44 | 60.99  |
| 50000 | 1.17 | 0.25 | 0.75 | 3656 | 18750 | 28125 | 47.24 | 0.2473 | 0.2527 | 0.7473 | 0.7527 | 3058 | 18615 | 28327 | 3192 | 18883 | 27924 | 119.34 | 69.77  |
| 50000 | 1.18 | 0.25 | 0.75 | 3688 | 18750 | 28125 | 52.74 | 0.2473 | 0.2527 | 0.7473 | 0.7527 | 3058 | 18615 | 28327 | 3192 | 18883 | 27924 | 131.88 | 79.15  |
| 50000 | 1.19 | 0.25 | 0.75 | 3719 | 18750 | 28125 | 58.52 | 0.2473 | 0.2527 | 0.7473 | 0.7527 | 3058 | 18615 | 28327 | 3192 | 18883 | 27924 | 145.06 | 89.15  |
| 50000 | 1.20 | 0.25 | 0.75 | 3750 | 18750 | 28125 | 64.57 | 0.2473 | 0.2527 | 0.7473 | 0.7527 | 3058 | 18615 | 28327 | 3192 | 18883 | 27924 | 158.87 | 99.76  |
| 50000 | 0.80 | 0.3  | 0.7  | 3600 | 21000 | 24500 | 98.02 | 0.2972 | 0.3028 | 0.6972 | 0.7028 | 4415 | 20886 | 24699 | 4586 | 21113 | 24302 | 152.75 | 214.07 |
| 50000 | 0.81 | 0.3  | 0.7  | 3645 | 21000 | 24500 | 87.98 | 0.2972 | 0.3028 | 0.6972 | 0.7028 | 4415 | 20886 | 24699 | 4586 | 21113 | 24302 | 136.59 | 195.16 |
| 50000 | 0.82 | 0.3  | 0.7  | 3690 | 21000 | 24500 | 78.54 | 0.2972 | 0.3028 | 0.6972 | 0.7028 | 4415 | 20886 | 24699 | 4586 | 21113 | 24302 | 121.35 | 177.14 |
| 50000 | 0.83 | 0.3  | 0.7  | 3735 | 21000 | 24500 | 69.68 | 0.2972 | 0.3028 | 0.6972 | 0.7028 | 4415 | 20886 | 24699 | 4586 | 21113 | 24302 | 107.02 | 160.01 |
| 50000 | 0.84 | 0.3  | 0.7  | 3780 | 21000 | 24500 | 61.39 | 0.2972 | 0.3028 | 0.6972 | 0.7028 | 4415 | 20886 | 24699 | 4586 | 21113 | 24302 | 93.62  | 143.75 |
| 50000 | 0.85 | 0.3  | 0.7  | 3825 | 21000 | 24500 | 53.66 | 0.2972 | 0.3028 | 0.6972 | 0.7028 | 4415 | 20886 | 24699 | 4586 | 21113 | 24302 | 81.13  | 128.39 |
| 50000 | 0.86 | 0.3  | 0.7  | 3870 | 21000 | 24500 | 46.50 | 0.2972 | 0.3028 | 0.6972 | 0.7028 | 4415 | 20886 | 24699 | 4586 | 21113 | 24302 | 69.56  | 113.90 |
| 50000 | 0.87 | 0.3  | 0.7  | 3915 | 21000 | 24500 | 39.88 | 0.2972 | 0.3028 | 0.6972 | 0.7028 | 4415 | 20886 | 24699 | 4586 | 21113 | 24302 | 58.90  | 100.30 |
| 50000 | 0.88 | 0.3  | 0.7  | 3960 | 21000 | 24500 | 33.80 | 0.2972 | 0.3028 | 0.6972 | 0.7028 | 4415 | 20886 | 24699 | 4586 | 21113 | 24302 | 49.16  | 87.57  |
| 50000 | 0.89 | 0.3  | 0.7  | 4005 | 21000 | 24500 | 28.25 | 0.2972 | 0.3028 | 0.6972 | 0.7028 | 4415 | 20886 | 24699 | 4586 | 21113 | 24302 | 40.34  | 75.74  |
| 50000 | 0.90 | 0.3  | 0.7  | 4050 | 21000 | 24500 | 23.22 | 0.2972 | 0.3028 | 0.6972 | 0.7028 | 4415 | 20886 | 24699 | 4586 | 21113 | 24302 | 32.44  | 64.78  |
| 50000 | 0.91 | 0.3  | 0.7  | 4095 | 21000 | 24500 | 18.71 | 0.2972 | 0.3028 | 0.6972 | 0.7028 | 4415 | 20886 | 24699 | 4586 | 21113 | 24302 | 25.45  | 54.71  |
| 50000 | 0.92 | 0.3  | 0.7  | 4140 | 21000 | 24500 | 14.71 | 0.2972 | 0.3028 | 0.6972 | 0.7028 | 4415 | 20886 | 24699 | 4586 | 21113 | 24302 | 19.39  | 45.53  |
| 50000 | 0.93 | 0.3  | 0.7  | 4185 | 21000 | 24500 | 11.20 | 0.2972 | 0.3028 | 0.6972 | 0.7028 | 4415 | 20886 | 24699 | 4586 | 21113 | 24302 | 14.24  | 37.22  |
| 50000 | 0.94 | 0.3  | 0.7  | 4230 | 21000 | 24500 | 8.19  | 0.2972 | 0.3028 | 0.6972 | 0.7028 | 4415 | 20886 | 24699 | 4586 | 21113 | 24302 | 10.00  | 29.80  |
| 50000 | 0.95 | 0.3  | 0.7  | 4275 | 21000 | 24500 | 5.66  | 0.2972 | 0.3028 | 0.6972 | 0.7028 | 4415 | 20886 | 24699 | 4586 | 21113 | 24302 | 6.69   | 23.26  |
| 50000 | 0.96 | 0.3  | 0.7  | 4320 | 21000 | 24500 | 3.60  | 0.2972 | 0.3028 | 0.6972 | 0.7028 | 4415 | 20886 | 24699 | 4586 | 21113 | 24302 | 4.29   | 17.61  |
| 50000 | 0.97 | 0.3  | 0.7  | 4365 | 21000 | 24500 | 2.02  | 0.2972 | 0.3028 | 0.6972 | 0.7028 | 4415 | 20886 | 24699 | 4586 | 21113 | 24302 | 2.80   | 12.84  |
| 50000 | 0.98 | 0.3  | 0.7  | 4410 | 21000 | 24500 | 0.89  | 0.2972 | 0.3028 | 0.6972 | 0.7028 | 4415 | 20886 | 24699 | 4586 | 21113 | 24302 | 2.24   | 8.95   |
| 50000 | 0.99 | 0.3  | 0.7  | 4455 | 21000 | 24500 | 0.22  | 0.2972 | 0.3028 | 0.6972 | 0.7028 | 4415 | 20886 | 24699 | 4586 | 21113 | 24302 | 2.59   | 5.94   |
| 50000 | 1.00 | 0.3  | 0.7  | 4500 | 21000 | 24500 | 0.00  | 0.2972 | 0.3028 | 0.6972 | 0.7028 | 4415 | 20886 | 24699 | 4586 | 21113 | 24302 | 3.86   | 3.82   |
| 50000 | 1.01 | 0.3  | 0.7  | 4545 | 21000 | 24500 | 0.22  | 0.2972 | 0.3028 | 0.6972 | 0.7028 | 4415 | 20886 | 24699 | 4586 | 21113 | 24302 | 6.05   | 2.58   |

|       |      |      |      |      |       |       |        |        |        |        |        |      |       |       |      |       |       |        |        |
|-------|------|------|------|------|-------|-------|--------|--------|--------|--------|--------|------|-------|-------|------|-------|-------|--------|--------|
| 50000 | 1.02 | 0.3  | 0.7  | 4590 | 21000 | 24500 | 0.87   | 0.2972 | 0.3028 | 0.6972 | 0.7028 | 4415 | 20886 | 24699 | 4586 | 21113 | 24302 | 9.15   | 2.23   |
| 50000 | 1.03 | 0.3  | 0.7  | 4635 | 21000 | 24500 | 1.95   | 0.2972 | 0.3028 | 0.6972 | 0.7028 | 4415 | 20886 | 24699 | 4586 | 21113 | 24302 | 13.18  | 2.75   |
| 50000 | 1.04 | 0.3  | 0.7  | 4680 | 21000 | 24500 | 3.46   | 0.2972 | 0.3028 | 0.6972 | 0.7028 | 4415 | 20886 | 24699 | 4586 | 21113 | 24302 | 18.12  | 4.17   |
| 50000 | 1.05 | 0.3  | 0.7  | 4725 | 21000 | 24500 | 5.37   | 0.2972 | 0.3028 | 0.6972 | 0.7028 | 4415 | 20886 | 24699 | 4586 | 21113 | 24302 | 23.97  | 6.46   |
| 50000 | 1.06 | 0.3  | 0.7  | 4770 | 21000 | 24500 | 7.70   | 0.2972 | 0.3028 | 0.6972 | 0.7028 | 4415 | 20886 | 24699 | 4586 | 21113 | 24302 | 30.75  | 9.64   |
| 50000 | 1.07 | 0.3  | 0.7  | 4815 | 21000 | 24500 | 10.43  | 0.2972 | 0.3028 | 0.6972 | 0.7028 | 4415 | 20886 | 24699 | 4586 | 21113 | 24302 | 38.44  | 13.70  |
| 50000 | 1.08 | 0.3  | 0.7  | 4860 | 21000 | 24500 | 13.56  | 0.2972 | 0.3028 | 0.6972 | 0.7028 | 4415 | 20886 | 24699 | 4586 | 21113 | 24302 | 47.05  | 18.64  |
| 50000 | 1.09 | 0.3  | 0.7  | 4905 | 21000 | 24500 | 17.07  | 0.2972 | 0.3028 | 0.6972 | 0.7028 | 4415 | 20886 | 24699 | 4586 | 21113 | 24302 | 56.57  | 24.47  |
| 50000 | 1.10 | 0.3  | 0.7  | 4950 | 21000 | 24500 | 20.97  | 0.2972 | 0.3028 | 0.6972 | 0.7028 | 4415 | 20886 | 24699 | 4586 | 21113 | 24302 | 67.01  | 31.18  |
| 50000 | 1.11 | 0.3  | 0.7  | 4995 | 21000 | 24500 | 25.25  | 0.2972 | 0.3028 | 0.6972 | 0.7028 | 4415 | 20886 | 24699 | 4586 | 21113 | 24302 | 78.37  | 38.77  |
| 50000 | 1.12 | 0.3  | 0.7  | 5040 | 21000 | 24500 | 29.90  | 0.2972 | 0.3028 | 0.6972 | 0.7028 | 4415 | 20886 | 24699 | 4586 | 21113 | 24302 | 90.65  | 47.25  |
| 50000 | 1.13 | 0.3  | 0.7  | 5085 | 21000 | 24500 | 34.92  | 0.2972 | 0.3028 | 0.6972 | 0.7028 | 4415 | 20886 | 24699 | 4586 | 21113 | 24302 | 103.85 | 56.61  |
| 50000 | 1.14 | 0.3  | 0.7  | 5130 | 21000 | 24500 | 40.31  | 0.2972 | 0.3028 | 0.6972 | 0.7028 | 4415 | 20886 | 24699 | 4586 | 21113 | 24302 | 117.96 | 66.85  |
| 50000 | 1.15 | 0.3  | 0.7  | 5175 | 21000 | 24500 | 46.04  | 0.2972 | 0.3028 | 0.6972 | 0.7028 | 4415 | 20886 | 24699 | 4586 | 21113 | 24302 | 132.99 | 77.98  |
| 50000 | 1.16 | 0.3  | 0.7  | 5220 | 21000 | 24500 | 52.14  | 0.2972 | 0.3028 | 0.6972 | 0.7028 | 4415 | 20886 | 24699 | 4586 | 21113 | 24302 | 148.93 | 89.99  |
| 50000 | 1.17 | 0.3  | 0.7  | 5265 | 21000 | 24500 | 58.57  | 0.2972 | 0.3028 | 0.6972 | 0.7028 | 4415 | 20886 | 24699 | 4586 | 21113 | 24302 | 165.80 | 102.88 |
| 50000 | 1.18 | 0.3  | 0.7  | 5310 | 21000 | 24500 | 65.35  | 0.2972 | 0.3028 | 0.6972 | 0.7028 | 4415 | 20886 | 24699 | 4586 | 21113 | 24302 | 183.58 | 116.65 |
| 50000 | 1.19 | 0.3  | 0.7  | 5355 | 21000 | 24500 | 72.47  | 0.2972 | 0.3028 | 0.6972 | 0.7028 | 4415 | 20886 | 24699 | 4586 | 21113 | 24302 | 202.28 | 131.31 |
| 50000 | 1.20 | 0.3  | 0.7  | 5400 | 21000 | 24500 | 79.91  | 0.2972 | 0.3028 | 0.6972 | 0.7028 | 4415 | 20886 | 24699 | 4586 | 21113 | 24302 | 221.89 | 146.85 |
| 50000 | 0.80 | 0.35 | 0.65 | 4900 | 22750 | 21125 | 116.75 | 0.3470 | 0.3530 | 0.6470 | 0.6530 | 6022 | 22660 | 21318 | 6229 | 22838 | 20933 | 211.13 | 285.61 |
| 50000 | 0.81 | 0.35 | 0.65 | 4961 | 22750 | 21125 | 104.71 | 0.3470 | 0.3530 | 0.6470 | 0.6530 | 6022 | 22660 | 21318 | 6229 | 22838 | 20933 | 188.93 | 260.08 |
| 50000 | 0.82 | 0.35 | 0.65 | 5023 | 22750 | 21125 | 93.39  | 0.3470 | 0.3530 | 0.6470 | 0.6530 | 6022 | 22660 | 21318 | 6229 | 22838 | 20933 | 167.98 | 235.75 |
| 50000 | 0.83 | 0.35 | 0.65 | 5084 | 22750 | 21125 | 82.79  | 0.3470 | 0.3530 | 0.6470 | 0.6530 | 6022 | 22660 | 21318 | 6229 | 22838 | 20933 | 148.27 | 212.63 |
| 50000 | 0.84 | 0.35 | 0.65 | 5145 | 22750 | 21125 | 72.88  | 0.3470 | 0.3530 | 0.6470 | 0.6530 | 6022 | 22660 | 21318 | 6229 | 22838 | 20933 | 129.80 | 190.71 |
| 50000 | 0.85 | 0.35 | 0.65 | 5206 | 22750 | 21125 | 63.67  | 0.3470 | 0.3530 | 0.6470 | 0.6530 | 6022 | 22660 | 21318 | 6229 | 22838 | 20933 | 112.59 | 169.99 |
| 50000 | 0.86 | 0.35 | 0.65 | 5268 | 22750 | 21125 | 55.12  | 0.3470 | 0.3530 | 0.6470 | 0.6530 | 6022 | 22660 | 21318 | 6229 | 22838 | 20933 | 96.62  | 150.48 |
| 50000 | 0.87 | 0.35 | 0.65 | 5329 | 22750 | 21125 | 47.24  | 0.3470 | 0.3530 | 0.6470 | 0.6530 | 6022 | 22660 | 21318 | 6229 | 22838 | 20933 | 81.89  | 132.18 |
| 50000 | 0.88 | 0.35 | 0.65 | 5390 | 22750 | 21125 | 40.01  | 0.3470 | 0.3530 | 0.6470 | 0.6530 | 6022 | 22660 | 21318 | 6229 | 22838 | 20933 | 68.41  | 115.08 |
| 50000 | 0.89 | 0.35 | 0.65 | 5451 | 22750 | 21125 | 33.41  | 0.3470 | 0.3530 | 0.6470 | 0.6530 | 6022 | 22660 | 21318 | 6229 | 22838 | 20933 | 56.18  | 99.18  |
| 50000 | 0.90 | 0.35 | 0.65 | 5513 | 22750 | 21125 | 27.45  | 0.3470 | 0.3530 | 0.6470 | 0.6530 | 6022 | 22660 | 21318 | 6229 | 22838 | 20933 | 45.20  | 84.49  |
| 50000 | 0.91 | 0.35 | 0.65 | 5574 | 22750 | 21125 | 22.10  | 0.3470 | 0.3530 | 0.6470 | 0.6530 | 6022 | 22660 | 21318 | 6229 | 22838 | 20933 | 35.45  | 71.00  |
| 50000 | 0.92 | 0.35 | 0.65 | 5635 | 22750 | 21125 | 17.36  | 0.3470 | 0.3530 | 0.6470 | 0.6530 | 6022 | 22660 | 21318 | 6229 | 22838 | 20933 | 26.96  | 58.72  |
| 50000 | 0.93 | 0.35 | 0.65 | 5696 | 22750 | 21125 | 13.21  | 0.3470 | 0.3530 | 0.6470 | 0.6530 | 6022 | 22660 | 21318 | 6229 | 22838 | 20933 | 19.71  | 47.64  |
| 50000 | 0.94 | 0.35 | 0.65 | 5758 | 22750 | 21125 | 9.65   | 0.3470 | 0.3530 | 0.6470 | 0.6530 | 6022 | 22660 | 21318 | 6229 | 22838 | 20933 | 13.71  | 37.77  |
| 50000 | 0.95 | 0.35 | 0.65 | 5819 | 22750 | 21125 | 6.66   | 0.3470 | 0.3530 | 0.6470 | 0.6530 | 6022 | 22660 | 21318 | 6229 | 22838 | 20933 | 8.95   | 29.10  |

|       |      |      |      |      |       |       |        |        |        |        |        |      |       |       |      |       |       |        |        |
|-------|------|------|------|------|-------|-------|--------|--------|--------|--------|--------|------|-------|-------|------|-------|-------|--------|--------|
| 50000 | 0.96 | 0.35 | 0.65 | 5880 | 22750 | 21125 | 4.24   | 0.3470 | 0.3530 | 0.6470 | 0.6530 | 6022 | 22660 | 21318 | 6229 | 22838 | 20933 | 5.44   | 21.64  |
| 50000 | 0.97 | 0.35 | 0.65 | 5941 | 22750 | 21125 | 2.37   | 0.3470 | 0.3530 | 0.6470 | 0.6530 | 6022 | 22660 | 21318 | 6229 | 22838 | 20933 | 3.18   | 15.38  |
| 50000 | 0.98 | 0.35 | 0.65 | 6003 | 22750 | 21125 | 1.05   | 0.3470 | 0.3530 | 0.6470 | 0.6530 | 6022 | 22660 | 21318 | 6229 | 22838 | 20933 | 2.16   | 10.32  |
| 50000 | 0.99 | 0.35 | 0.65 | 6064 | 22750 | 21125 | 0.26   | 0.3470 | 0.3530 | 0.6470 | 0.6530 | 6022 | 22660 | 21318 | 6229 | 22838 | 20933 | 2.38   | 6.47   |
| 50000 | 1.00 | 0.35 | 0.65 | 6125 | 22750 | 21125 | 0.00   | 0.3470 | 0.3530 | 0.6470 | 0.6530 | 6022 | 22660 | 21318 | 6229 | 22838 | 20933 | 3.86   | 3.83   |
| 50000 | 1.01 | 0.35 | 0.65 | 6186 | 22750 | 21125 | 0.26   | 0.3470 | 0.3530 | 0.6470 | 0.6530 | 6022 | 22660 | 21318 | 6229 | 22838 | 20933 | 6.58   | 2.39   |
| 50000 | 1.02 | 0.35 | 0.65 | 6248 | 22750 | 21125 | 1.02   | 0.3470 | 0.3530 | 0.6470 | 0.6530 | 6022 | 22660 | 21318 | 6229 | 22838 | 20933 | 10.54  | 2.15   |
| 50000 | 1.03 | 0.35 | 0.65 | 6309 | 22750 | 21125 | 2.29   | 0.3470 | 0.3530 | 0.6470 | 0.6530 | 6022 | 22660 | 21318 | 6229 | 22838 | 20933 | 15.75  | 3.12   |
| 50000 | 1.04 | 0.35 | 0.65 | 6370 | 22750 | 21125 | 4.05   | 0.3470 | 0.3530 | 0.6470 | 0.6530 | 6022 | 22660 | 21318 | 6229 | 22838 | 20933 | 22.21  | 5.29   |
| 50000 | 1.05 | 0.35 | 0.65 | 6431 | 22750 | 21125 | 6.29   | 0.3470 | 0.3530 | 0.6470 | 0.6530 | 6022 | 22660 | 21318 | 6229 | 22838 | 20933 | 29.91  | 8.67   |
| 50000 | 1.06 | 0.35 | 0.65 | 6493 | 22750 | 21125 | 9.00   | 0.3470 | 0.3530 | 0.6470 | 0.6530 | 6022 | 22660 | 21318 | 6229 | 22838 | 20933 | 38.86  | 13.25  |
| 50000 | 1.07 | 0.35 | 0.65 | 6554 | 22750 | 21125 | 12.18  | 0.3470 | 0.3530 | 0.6470 | 0.6530 | 6022 | 22660 | 21318 | 6229 | 22838 | 20933 | 49.05  | 19.03  |
| 50000 | 1.08 | 0.35 | 0.65 | 6615 | 22750 | 21125 | 15.83  | 0.3470 | 0.3530 | 0.6470 | 0.6530 | 6022 | 22660 | 21318 | 6229 | 22838 | 20933 | 60.49  | 26.03  |
| 50000 | 1.09 | 0.35 | 0.65 | 6676 | 22750 | 21125 | 19.92  | 0.3470 | 0.3530 | 0.6470 | 0.6530 | 6022 | 22660 | 21318 | 6229 | 22838 | 20933 | 73.18  | 34.22  |
| 50000 | 1.10 | 0.35 | 0.65 | 6738 | 22750 | 21125 | 24.45  | 0.3470 | 0.3530 | 0.6470 | 0.6530 | 6022 | 22660 | 21318 | 6229 | 22838 | 20933 | 87.11  | 43.62  |
| 50000 | 1.11 | 0.35 | 0.65 | 6799 | 22750 | 21125 | 29.43  | 0.3470 | 0.3530 | 0.6470 | 0.6530 | 6022 | 22660 | 21318 | 6229 | 22838 | 20933 | 102.29 | 54.22  |
| 50000 | 1.12 | 0.35 | 0.65 | 6860 | 22750 | 21125 | 34.83  | 0.3470 | 0.3530 | 0.6470 | 0.6530 | 6022 | 22660 | 21318 | 6229 | 22838 | 20933 | 118.72 | 66.03  |
| 50000 | 1.13 | 0.35 | 0.65 | 6921 | 22750 | 21125 | 40.65  | 0.3470 | 0.3530 | 0.6470 | 0.6530 | 6022 | 22660 | 21318 | 6229 | 22838 | 20933 | 136.39 | 79.05  |
| 50000 | 1.14 | 0.35 | 0.65 | 6983 | 22750 | 21125 | 46.88  | 0.3470 | 0.3530 | 0.6470 | 0.6530 | 6022 | 22660 | 21318 | 6229 | 22838 | 20933 | 155.30 | 93.27  |
| 50000 | 1.15 | 0.35 | 0.65 | 7044 | 22750 | 21125 | 53.53  | 0.3470 | 0.3530 | 0.6470 | 0.6530 | 6022 | 22660 | 21318 | 6229 | 22838 | 20933 | 175.47 | 108.69 |
| 50000 | 1.16 | 0.35 | 0.65 | 7105 | 22750 | 21125 | 60.57  | 0.3470 | 0.3530 | 0.6470 | 0.6530 | 6022 | 22660 | 21318 | 6229 | 22838 | 20933 | 196.87 | 125.32 |
| 50000 | 1.17 | 0.35 | 0.65 | 7166 | 22750 | 21125 | 68.01  | 0.3470 | 0.3530 | 0.6470 | 0.6530 | 6022 | 22660 | 21318 | 6229 | 22838 | 20933 | 219.53 | 143.15 |
| 50000 | 1.18 | 0.35 | 0.65 | 7228 | 22750 | 21125 | 75.84  | 0.3470 | 0.3530 | 0.6470 | 0.6530 | 6022 | 22660 | 21318 | 6229 | 22838 | 20933 | 243.43 | 162.18 |
| 50000 | 1.19 | 0.35 | 0.65 | 7289 | 22750 | 21125 | 84.04  | 0.3470 | 0.3530 | 0.6470 | 0.6530 | 6022 | 22660 | 21318 | 6229 | 22838 | 20933 | 268.57 | 182.42 |
| 50000 | 1.20 | 0.35 | 0.65 | 7350 | 22750 | 21125 | 92.63  | 0.3470 | 0.3530 | 0.6470 | 0.6530 | 6022 | 22660 | 21318 | 6229 | 22838 | 20933 | 294.97 | 203.87 |
| 50000 | 0.80 | 0.4  | 0.6  | 6400 | 24000 | 18000 | 131.75 | 0.3970 | 0.4030 | 0.5970 | 0.6030 | 7879 | 23938 | 18183 | 8122 | 24060 | 17818 | 279.62 | 367.06 |
| 50000 | 0.81 | 0.4  | 0.6  | 6480 | 24000 | 18000 | 118.07 | 0.3970 | 0.4030 | 0.5970 | 0.6030 | 7879 | 23938 | 18183 | 8122 | 24060 | 17818 | 250.40 | 333.93 |
| 50000 | 0.82 | 0.4  | 0.6  | 6560 | 24000 | 18000 | 105.23 | 0.3970 | 0.4030 | 0.5970 | 0.6030 | 7879 | 23938 | 18183 | 8122 | 24060 | 17818 | 222.80 | 302.37 |
| 50000 | 0.83 | 0.4  | 0.6  | 6640 | 24000 | 18000 | 93.21  | 0.3970 | 0.4030 | 0.5970 | 0.6030 | 7879 | 23938 | 18183 | 8122 | 24060 | 17818 | 196.83 | 272.39 |
| 50000 | 0.84 | 0.4  | 0.6  | 6720 | 24000 | 18000 | 82.00  | 0.3970 | 0.4030 | 0.5970 | 0.6030 | 7879 | 23938 | 18183 | 8122 | 24060 | 17818 | 172.48 | 243.99 |
| 50000 | 0.85 | 0.4  | 0.6  | 6800 | 24000 | 18000 | 71.58  | 0.3970 | 0.4030 | 0.5970 | 0.6030 | 7879 | 23938 | 18183 | 8122 | 24060 | 17818 | 149.76 | 217.16 |
| 50000 | 0.86 | 0.4  | 0.6  | 6880 | 24000 | 18000 | 61.92  | 0.3970 | 0.4030 | 0.5970 | 0.6030 | 7879 | 23938 | 18183 | 8122 | 24060 | 17818 | 128.66 | 191.90 |
| 50000 | 0.87 | 0.4  | 0.6  | 6960 | 24000 | 18000 | 53.03  | 0.3970 | 0.4030 | 0.5970 | 0.6030 | 7879 | 23938 | 18183 | 8122 | 24060 | 17818 | 109.19 | 168.23 |
| 50000 | 0.88 | 0.4  | 0.6  | 7040 | 24000 | 18000 | 44.88  | 0.3970 | 0.4030 | 0.5970 | 0.6030 | 7879 | 23938 | 18183 | 8122 | 24060 | 17818 | 91.34  | 146.12 |
| 50000 | 0.89 | 0.4  | 0.6  | 7120 | 24000 | 18000 | 37.46  | 0.3970 | 0.4030 | 0.5970 | 0.6030 | 7879 | 23938 | 18183 | 8122 | 24060 | 17818 | 75.11  | 125.60 |

|       |      |      |      |      |       |       |        |        |        |        |        |      |       |       |       |       |       |        |        |
|-------|------|------|------|------|-------|-------|--------|--------|--------|--------|--------|------|-------|-------|-------|-------|-------|--------|--------|
| 50000 | 0.90 | 0.4  | 0.6  | 7200 | 24000 | 18000 | 30.75  | 0.3970 | 0.4030 | 0.5970 | 0.6030 | 7879 | 23938 | 18183 | 8122  | 24060 | 17818 | 60.51  | 106.65 |
| 50000 | 0.91 | 0.4  | 0.6  | 7280 | 24000 | 18000 | 24.74  | 0.3970 | 0.4030 | 0.5970 | 0.6030 | 7879 | 23938 | 18183 | 8122  | 24060 | 17818 | 47.53  | 89.28  |
| 50000 | 0.92 | 0.4  | 0.6  | 7360 | 24000 | 18000 | 19.42  | 0.3970 | 0.4030 | 0.5970 | 0.6030 | 7879 | 23938 | 18183 | 8122  | 24060 | 17818 | 36.18  | 73.48  |
| 50000 | 0.93 | 0.4  | 0.6  | 7440 | 24000 | 18000 | 14.77  | 0.3970 | 0.4030 | 0.5970 | 0.6030 | 7879 | 23938 | 18183 | 8122  | 24060 | 17818 | 26.45  | 59.26  |
| 50000 | 0.94 | 0.4  | 0.6  | 7520 | 24000 | 18000 | 10.78  | 0.3970 | 0.4030 | 0.5970 | 0.6030 | 7879 | 23938 | 18183 | 8122  | 24060 | 17818 | 18.35  | 46.61  |
| 50000 | 0.95 | 0.4  | 0.6  | 7600 | 24000 | 18000 | 7.44   | 0.3970 | 0.4030 | 0.5970 | 0.6030 | 7879 | 23938 | 18183 | 8122  | 24060 | 17818 | 11.87  | 35.54  |
| 50000 | 0.96 | 0.4  | 0.6  | 7680 | 24000 | 18000 | 4.73   | 0.3970 | 0.4030 | 0.5970 | 0.6030 | 7879 | 23938 | 18183 | 8122  | 24060 | 17818 | 7.02   | 26.05  |
| 50000 | 0.97 | 0.4  | 0.6  | 7760 | 24000 | 18000 | 2.64   | 0.3970 | 0.4030 | 0.5970 | 0.6030 | 7879 | 23938 | 18183 | 8122  | 24060 | 17818 | 3.79   | 18.13  |
| 50000 | 0.98 | 0.4  | 0.6  | 7840 | 24000 | 18000 | 1.17   | 0.3970 | 0.4030 | 0.5970 | 0.6030 | 7879 | 23938 | 18183 | 8122  | 24060 | 17818 | 2.19   | 11.79  |
| 50000 | 0.99 | 0.4  | 0.6  | 7920 | 24000 | 18000 | 0.29   | 0.3970 | 0.4030 | 0.5970 | 0.6030 | 7879 | 23938 | 18183 | 8122  | 24060 | 17818 | 2.21   | 7.02   |
| 50000 | 1.00 | 0.4  | 0.6  | 8000 | 24000 | 18000 | 0.00   | 0.3970 | 0.4030 | 0.5970 | 0.6030 | 7879 | 23938 | 18183 | 8122  | 24060 | 17818 | 3.85   | 3.83   |
| 50000 | 1.01 | 0.4  | 0.6  | 8080 | 24000 | 18000 | 0.29   | 0.3970 | 0.4030 | 0.5970 | 0.6030 | 7879 | 23938 | 18183 | 8122  | 24060 | 17818 | 7.12   | 2.22   |
| 50000 | 1.02 | 0.4  | 0.6  | 8160 | 24000 | 18000 | 1.14   | 0.3970 | 0.4030 | 0.5970 | 0.6030 | 7879 | 23938 | 18183 | 8122  | 24060 | 17818 | 12.01  | 2.18   |
| 50000 | 1.03 | 0.4  | 0.6  | 8240 | 24000 | 18000 | 2.54   | 0.3970 | 0.4030 | 0.5970 | 0.6030 | 7879 | 23938 | 18183 | 8122  | 24060 | 17818 | 18.53  | 3.72   |
| 50000 | 1.04 | 0.4  | 0.6  | 8320 | 24000 | 18000 | 4.49   | 0.3970 | 0.4030 | 0.5970 | 0.6030 | 7879 | 23938 | 18183 | 8122  | 24060 | 17818 | 26.68  | 6.83   |
| 50000 | 1.05 | 0.4  | 0.6  | 8400 | 24000 | 18000 | 6.98   | 0.3970 | 0.4030 | 0.5970 | 0.6030 | 7879 | 23938 | 18183 | 8122  | 24060 | 17818 | 36.44  | 11.52  |
| 50000 | 1.06 | 0.4  | 0.6  | 8480 | 24000 | 18000 | 9.98   | 0.3970 | 0.4030 | 0.5970 | 0.6030 | 7879 | 23938 | 18183 | 8122  | 24060 | 17818 | 47.84  | 17.79  |
| 50000 | 1.07 | 0.4  | 0.6  | 8560 | 24000 | 18000 | 13.50  | 0.3970 | 0.4030 | 0.5970 | 0.6030 | 7879 | 23938 | 18183 | 8122  | 24060 | 17818 | 60.85  | 25.63  |
| 50000 | 1.08 | 0.4  | 0.6  | 8640 | 24000 | 18000 | 17.53  | 0.3970 | 0.4030 | 0.5970 | 0.6030 | 7879 | 23938 | 18183 | 8122  | 24060 | 17818 | 75.49  | 35.05  |
| 50000 | 1.09 | 0.4  | 0.6  | 8720 | 24000 | 18000 | 22.05  | 0.3970 | 0.4030 | 0.5970 | 0.6030 | 7879 | 23938 | 18183 | 8122  | 24060 | 17818 | 91.76  | 46.04  |
| 50000 | 1.10 | 0.4  | 0.6  | 8800 | 24000 | 18000 | 27.05  | 0.3970 | 0.4030 | 0.5970 | 0.6030 | 7879 | 23938 | 18183 | 8122  | 24060 | 17818 | 109.65 | 58.61  |
| 50000 | 1.11 | 0.4  | 0.6  | 8880 | 24000 | 18000 | 32.54  | 0.3970 | 0.4030 | 0.5970 | 0.6030 | 7879 | 23938 | 18183 | 8122  | 24060 | 17818 | 129.17 | 72.76  |
| 50000 | 1.12 | 0.4  | 0.6  | 8960 | 24000 | 18000 | 38.49  | 0.3970 | 0.4030 | 0.5970 | 0.6030 | 7879 | 23938 | 18183 | 8122  | 24060 | 17818 | 150.31 | 88.48  |
| 50000 | 1.13 | 0.4  | 0.6  | 9040 | 24000 | 18000 | 44.89  | 0.3970 | 0.4030 | 0.5970 | 0.6030 | 7879 | 23938 | 18183 | 8122  | 24060 | 17818 | 173.07 | 105.78 |
| 50000 | 1.14 | 0.4  | 0.6  | 9120 | 24000 | 18000 | 51.75  | 0.3970 | 0.4030 | 0.5970 | 0.6030 | 7879 | 23938 | 18183 | 8122  | 24060 | 17818 | 197.46 | 124.65 |
| 50000 | 1.15 | 0.4  | 0.6  | 9200 | 24000 | 18000 | 59.06  | 0.3970 | 0.4030 | 0.5970 | 0.6030 | 7879 | 23938 | 18183 | 8122  | 24060 | 17818 | 223.47 | 145.10 |
| 50000 | 1.16 | 0.4  | 0.6  | 9280 | 24000 | 18000 | 66.79  | 0.3970 | 0.4030 | 0.5970 | 0.6030 | 7879 | 23938 | 18183 | 8122  | 24060 | 17818 | 251.11 | 167.13 |
| 50000 | 1.17 | 0.4  | 0.6  | 9360 | 24000 | 18000 | 74.96  | 0.3970 | 0.4030 | 0.5970 | 0.6030 | 7879 | 23938 | 18183 | 8122  | 24060 | 17818 | 280.37 | 190.73 |
| 50000 | 1.18 | 0.4  | 0.6  | 9440 | 24000 | 18000 | 83.54  | 0.3970 | 0.4030 | 0.5970 | 0.6030 | 7879 | 23938 | 18183 | 8122  | 24060 | 17818 | 311.26 | 215.91 |
| 50000 | 1.19 | 0.4  | 0.6  | 9520 | 24000 | 18000 | 92.53  | 0.3970 | 0.4030 | 0.5970 | 0.6030 | 7879 | 23938 | 18183 | 8122  | 24060 | 17818 | 343.77 | 242.66 |
| 50000 | 1.20 | 0.4  | 0.6  | 9600 | 24000 | 18000 | 101.93 | 0.3970 | 0.4030 | 0.5970 | 0.6030 | 7879 | 23938 | 18183 | 8122  | 24060 | 17818 | 377.91 | 270.99 |
| 50000 | 0.80 | 0.45 | 0.55 | 8100 | 24750 | 15125 | 141.95 | 0.4469 | 0.4531 | 0.5469 | 0.5531 | 9987 | 24718 | 15295 | 10264 | 24780 | 14956 | 358.38 | 458.28 |
| 50000 | 0.81 | 0.45 | 0.55 | 8201 | 24750 | 15125 | 127.12 | 0.4469 | 0.4531 | 0.5469 | 0.5531 | 9987 | 24718 | 15295 | 10264 | 24780 | 14956 | 321.15 | 416.58 |
| 50000 | 0.82 | 0.45 | 0.55 | 8303 | 24750 | 15125 | 113.22 | 0.4469 | 0.4531 | 0.5469 | 0.5531 | 9987 | 24718 | 15295 | 10264 | 24780 | 14956 | 285.97 | 376.88 |
| 50000 | 0.83 | 0.45 | 0.55 | 8404 | 24750 | 15125 | 100.21 | 0.4469 | 0.4531 | 0.5469 | 0.5531 | 9987 | 24718 | 15295 | 10264 | 24780 | 14956 | 252.84 | 339.18 |



|       |      |      |      |       |       |       |       |        |        |        |        |      |       |       |       |       |       |        |        |
|-------|------|------|------|-------|-------|-------|-------|--------|--------|--------|--------|------|-------|-------|-------|-------|-------|--------|--------|
| 50000 | 0.84 | 0.45 | 0.55 | 8505  | 24750 | 15125 | 88.10 | 0.4469 | 0.4531 | 0.5469 | 0.5531 | 9987 | 24718 | 15295 | 10264 | 24780 | 14956 | 221.77 | 303.47 |
| 50000 | 0.85 | 0.45 | 0.55 | 8606  | 24750 | 15125 | 76.84 | 0.4469 | 0.4531 | 0.5469 | 0.5531 | 9987 | 24718 | 15295 | 10264 | 24780 | 14956 | 192.75 | 269.76 |
| 50000 | 0.86 | 0.45 | 0.55 | 8708  | 24750 | 15125 | 66.44 | 0.4469 | 0.4531 | 0.5469 | 0.5531 | 9987 | 24718 | 15295 | 10264 | 24780 | 14956 | 165.79 | 238.05 |
| 50000 | 0.87 | 0.45 | 0.55 | 8809  | 24750 | 15125 | 56.86 | 0.4469 | 0.4531 | 0.5469 | 0.5531 | 9987 | 24718 | 15295 | 10264 | 24780 | 14956 | 140.88 | 208.34 |
| 50000 | 0.88 | 0.45 | 0.55 | 8910  | 24750 | 15125 | 48.09 | 0.4469 | 0.4531 | 0.5469 | 0.5531 | 9987 | 24718 | 15295 | 10264 | 24780 | 14956 | 118.02 | 180.62 |
| 50000 | 0.89 | 0.45 | 0.55 | 9011  | 24750 | 15125 | 40.11 | 0.4469 | 0.4531 | 0.5469 | 0.5531 | 9987 | 24718 | 15295 | 10264 | 24780 | 14956 | 97.21  | 154.90 |
| 50000 | 0.90 | 0.45 | 0.55 | 9113  | 24750 | 15125 | 32.90 | 0.4469 | 0.4531 | 0.5469 | 0.5531 | 9987 | 24718 | 15295 | 10264 | 24780 | 14956 | 78.46  | 131.18 |
| 50000 | 0.91 | 0.45 | 0.55 | 9214  | 24750 | 15125 | 26.46 | 0.4469 | 0.4531 | 0.5469 | 0.5531 | 9987 | 24718 | 15295 | 10264 | 24780 | 14956 | 61.76  | 109.46 |
| 50000 | 0.92 | 0.45 | 0.55 | 9315  | 24750 | 15125 | 20.75 | 0.4469 | 0.4531 | 0.5469 | 0.5531 | 9987 | 24718 | 15295 | 10264 | 24780 | 14956 | 47.11  | 89.73  |
| 50000 | 0.93 | 0.45 | 0.55 | 9416  | 24750 | 15125 | 15.77 | 0.4469 | 0.4531 | 0.5469 | 0.5531 | 9987 | 24718 | 15295 | 10264 | 24780 | 14956 | 34.52  | 72.00  |
| 50000 | 0.94 | 0.45 | 0.55 | 9518  | 24750 | 15125 | 11.51 | 0.4469 | 0.4531 | 0.5469 | 0.5531 | 9987 | 24718 | 15295 | 10264 | 24780 | 14956 | 23.98  | 56.27  |
| 50000 | 0.95 | 0.45 | 0.55 | 9619  | 24750 | 15125 | 7.93  | 0.4469 | 0.4531 | 0.5469 | 0.5531 | 9987 | 24718 | 15295 | 10264 | 24780 | 14956 | 15.49  | 42.54  |
| 50000 | 0.96 | 0.45 | 0.55 | 9720  | 24750 | 15125 | 5.04  | 0.4469 | 0.4531 | 0.5469 | 0.5531 | 9987 | 24718 | 15295 | 10264 | 24780 | 14956 | 9.06   | 30.80  |
| 50000 | 0.97 | 0.45 | 0.55 | 9821  | 24750 | 15125 | 2.82  | 0.4469 | 0.4531 | 0.5469 | 0.5531 | 9987 | 24718 | 15295 | 10264 | 24780 | 14956 | 4.67   | 21.07  |
| 50000 | 0.98 | 0.45 | 0.55 | 9923  | 24750 | 15125 | 1.24  | 0.4469 | 0.4531 | 0.5469 | 0.5531 | 9987 | 24718 | 15295 | 10264 | 24780 | 14956 | 2.34   | 13.33  |
| 50000 | 0.99 | 0.45 | 0.55 | 10024 | 24750 | 15125 | 0.31  | 0.4469 | 0.4531 | 0.5469 | 0.5531 | 9987 | 24718 | 15295 | 10264 | 24780 | 14956 | 2.07   | 7.58   |
| 50000 | 1.00 | 0.45 | 0.55 | 10125 | 24750 | 15125 | 0.00  | 0.4469 | 0.4531 | 0.5469 | 0.5531 | 9987 | 24718 | 15295 | 10264 | 24780 | 14956 | 3.85   | 3.84   |
| 50000 | 1.01 | 0.45 | 0.55 | 10226 | 24750 | 15125 | 0.30  | 0.4469 | 0.4531 | 0.5469 | 0.5531 | 9987 | 24718 | 15295 | 10264 | 24780 | 14956 | 7.68   | 2.09   |
| 50000 | 1.02 | 0.45 | 0.55 | 10328 | 24750 | 15125 | 1.21  | 0.4469 | 0.4531 | 0.5469 | 0.5531 | 9987 | 24718 | 15295 | 10264 | 24780 | 14956 | 13.56  | 2.34   |
| 50000 | 1.03 | 0.45 | 0.55 | 10429 | 24750 | 15125 | 2.70  | 0.4469 | 0.4531 | 0.5469 | 0.5531 | 9987 | 24718 | 15295 | 10264 | 24780 | 14956 | 21.50  | 4.59   |
| 50000 | 1.04 | 0.45 | 0.55 | 10530 | 24750 | 15125 | 4.77  | 0.4469 | 0.4531 | 0.5469 | 0.5531 | 9987 | 24718 | 15295 | 10264 | 24780 | 14956 | 31.49  | 8.83   |
| 50000 | 1.05 | 0.45 | 0.55 | 10631 | 24750 | 15125 | 7.40  | 0.4469 | 0.4531 | 0.5469 | 0.5531 | 9987 | 24718 | 15295 | 10264 | 24780 | 14956 | 43.53  | 15.07  |
| 50000 | 1.06 | 0.45 | 0.55 | 10733 | 24750 | 15125 | 10.58 | 0.4469 | 0.4531 | 0.5469 | 0.5531 | 9987 | 24718 | 15295 | 10264 | 24780 | 14956 | 57.62  | 23.31  |
| 50000 | 1.07 | 0.45 | 0.55 | 10834 | 24750 | 15125 | 14.31 | 0.4469 | 0.4531 | 0.5469 | 0.5531 | 9987 | 24718 | 15295 | 10264 | 24780 | 14956 | 73.77  | 33.55  |
| 50000 | 1.08 | 0.45 | 0.55 | 10935 | 24750 | 15125 | 18.56 | 0.4469 | 0.4531 | 0.5469 | 0.5531 | 9987 | 24718 | 15295 | 10264 | 24780 | 14956 | 91.98  | 45.78  |
| 50000 | 1.09 | 0.45 | 0.55 | 11036 | 24750 | 15125 | 23.33 | 0.4469 | 0.4531 | 0.5469 | 0.5531 | 9987 | 24718 | 15295 | 10264 | 24780 | 14956 | 112.23 | 60.02  |
| 50000 | 1.10 | 0.45 | 0.55 | 11138 | 24750 | 15125 | 28.62 | 0.4469 | 0.4531 | 0.5469 | 0.5531 | 9987 | 24718 | 15295 | 10264 | 24780 | 14956 | 134.54 | 76.24  |
| 50000 | 1.11 | 0.45 | 0.55 | 11239 | 24750 | 15125 | 34.40 | 0.4469 | 0.4531 | 0.5469 | 0.5531 | 9987 | 24718 | 15295 | 10264 | 24780 | 14956 | 158.90 | 94.47  |
| 50000 | 1.12 | 0.45 | 0.55 | 11340 | 24750 | 15125 | 40.67 | 0.4469 | 0.4531 | 0.5469 | 0.5531 | 9987 | 24718 | 15295 | 10264 | 24780 | 14956 | 185.31 | 114.70 |
| 50000 | 1.13 | 0.45 | 0.55 | 11441 | 24750 | 15125 | 47.41 | 0.4469 | 0.4531 | 0.5469 | 0.5531 | 9987 | 24718 | 15295 | 10264 | 24780 | 14956 | 213.78 | 136.92 |
| 50000 | 1.14 | 0.45 | 0.55 | 11543 | 24750 | 15125 | 54.63 | 0.4469 | 0.4531 | 0.5469 | 0.5531 | 9987 | 24718 | 15295 | 10264 | 24780 | 14956 | 244.30 | 161.14 |
| 50000 | 1.15 | 0.45 | 0.55 | 11644 | 24750 | 15125 | 62.31 | 0.4469 | 0.4531 | 0.5469 | 0.5531 | 9987 | 24718 | 15295 | 10264 | 24780 | 14956 | 276.87 | 187.36 |
| 50000 | 1.16 | 0.45 | 0.55 | 11745 | 24750 | 15125 | 70.44 | 0.4469 | 0.4531 | 0.5469 | 0.5531 | 9987 | 24718 | 15295 | 10264 | 24780 | 14956 | 311.50 | 215.57 |
| 50000 | 1.17 | 0.45 | 0.55 | 11846 | 24750 | 15125 | 79.01 | 0.4469 | 0.4531 | 0.5469 | 0.5531 | 9987 | 24718 | 15295 | 10264 | 24780 | 14956 | 348.18 | 245.78 |
| 50000 | 1.18 | 0.45 | 0.55 | 11948 | 24750 | 15125 | 88.02 | 0.4469 | 0.4531 | 0.5469 | 0.5531 | 9987 | 24718 | 15295 | 10264 | 24780 | 14956 | 386.91 | 277.99 |

|       |      |      |      |       |       |       |        |        |        |        |        |       |       |       |       |       |       |        |        |
|-------|------|------|------|-------|-------|-------|--------|--------|--------|--------|--------|-------|-------|-------|-------|-------|-------|--------|--------|
| 50000 | 1.19 | 0.45 | 0.55 | 12049 | 24750 | 15125 | 97.45  | 0.4469 | 0.4531 | 0.5469 | 0.5531 | 9987  | 24718 | 15295 | 10264 | 24780 | 14956 | 427.69 | 312.20 |
| 50000 | 1.20 | 0.45 | 0.55 | 12150 | 24750 | 15125 | 107.29 | 0.4469 | 0.4531 | 0.5469 | 0.5531 | 9987  | 24718 | 15295 | 10264 | 24780 | 14956 | 470.53 | 348.41 |
| 50000 | 0.80 | 0.5  | 0.5  | 10000 | 25000 | 12500 | 146.60 | 0.4969 | 0.5031 | 0.4969 | 0.5031 | 12346 | 24999 | 12655 | 12655 | 24999 | 12346 | 447.54 | 559.11 |
| 50000 | 0.81 | 0.5  | 0.5  | 10125 | 25000 | 12500 | 131.20 | 0.4969 | 0.5031 | 0.4969 | 0.5031 | 12346 | 24999 | 12655 | 12655 | 24999 | 12346 | 401.30 | 507.89 |
| 50000 | 0.82 | 0.5  | 0.5  | 10250 | 25000 | 12500 | 116.77 | 0.4969 | 0.5031 | 0.4969 | 0.5031 | 12346 | 24999 | 12655 | 12655 | 24999 | 12346 | 357.60 | 459.14 |
| 50000 | 0.83 | 0.5  | 0.5  | 10375 | 25000 | 12500 | 103.29 | 0.4969 | 0.5031 | 0.4969 | 0.5031 | 12346 | 24999 | 12655 | 12655 | 24999 | 12346 | 316.43 | 412.85 |
| 50000 | 0.84 | 0.5  | 0.5  | 10500 | 25000 | 12500 | 90.74  | 0.4969 | 0.5031 | 0.4969 | 0.5031 | 12346 | 24999 | 12655 | 12655 | 24999 | 12346 | 277.80 | 369.04 |
| 50000 | 0.85 | 0.5  | 0.5  | 10625 | 25000 | 12500 | 79.10  | 0.4969 | 0.5031 | 0.4969 | 0.5031 | 12346 | 24999 | 12655 | 12655 | 24999 | 12346 | 241.69 | 327.69 |
| 50000 | 0.86 | 0.5  | 0.5  | 10750 | 25000 | 12500 | 68.34  | 0.4969 | 0.5031 | 0.4969 | 0.5031 | 12346 | 24999 | 12655 | 12655 | 24999 | 12346 | 208.11 | 288.82 |
| 50000 | 0.87 | 0.5  | 0.5  | 10875 | 25000 | 12500 | 58.45  | 0.4969 | 0.5031 | 0.4969 | 0.5031 | 12346 | 24999 | 12655 | 12655 | 24999 | 12346 | 177.07 | 252.41 |
| 50000 | 0.88 | 0.5  | 0.5  | 11000 | 25000 | 12500 | 49.40  | 0.4969 | 0.5031 | 0.4969 | 0.5031 | 12346 | 24999 | 12655 | 12655 | 24999 | 12346 | 148.56 | 218.48 |
| 50000 | 0.89 | 0.5  | 0.5  | 11125 | 25000 | 12500 | 41.18  | 0.4969 | 0.5031 | 0.4969 | 0.5031 | 12346 | 24999 | 12655 | 12655 | 24999 | 12346 | 122.58 | 187.01 |
| 50000 | 0.90 | 0.5  | 0.5  | 11250 | 25000 | 12500 | 33.76  | 0.4969 | 0.5031 | 0.4969 | 0.5031 | 12346 | 24999 | 12655 | 12655 | 24999 | 12346 | 99.13  | 158.01 |
| 50000 | 0.91 | 0.5  | 0.5  | 11375 | 25000 | 12500 | 27.13  | 0.4969 | 0.5031 | 0.4969 | 0.5031 | 12346 | 24999 | 12655 | 12655 | 24999 | 12346 | 78.21  | 131.48 |
| 50000 | 0.92 | 0.5  | 0.5  | 11500 | 25000 | 12500 | 21.27  | 0.4969 | 0.5031 | 0.4969 | 0.5031 | 12346 | 24999 | 12655 | 12655 | 24999 | 12346 | 59.82  | 107.42 |
| 50000 | 0.93 | 0.5  | 0.5  | 11625 | 25000 | 12500 | 16.16  | 0.4969 | 0.5031 | 0.4969 | 0.5031 | 12346 | 24999 | 12655 | 12655 | 24999 | 12346 | 43.96  | 85.83  |
| 50000 | 0.94 | 0.5  | 0.5  | 11750 | 25000 | 12500 | 11.78  | 0.4969 | 0.5031 | 0.4969 | 0.5031 | 12346 | 24999 | 12655 | 12655 | 24999 | 12346 | 30.64  | 66.71  |
| 50000 | 0.95 | 0.5  | 0.5  | 11875 | 25000 | 12500 | 8.12   | 0.4969 | 0.5031 | 0.4969 | 0.5031 | 12346 | 24999 | 12655 | 12655 | 24999 | 12346 | 19.84  | 50.06  |
| 50000 | 0.96 | 0.5  | 0.5  | 12000 | 25000 | 12500 | 5.15   | 0.4969 | 0.5031 | 0.4969 | 0.5031 | 12346 | 24999 | 12655 | 12655 | 24999 | 12346 | 11.58  | 35.88  |
| 50000 | 0.97 | 0.5  | 0.5  | 12125 | 25000 | 12500 | 2.88   | 0.4969 | 0.5031 | 0.4969 | 0.5031 | 12346 | 24999 | 12655 | 12655 | 24999 | 12346 | 5.85   | 24.17  |
| 50000 | 0.98 | 0.5  | 0.5  | 12250 | 25000 | 12500 | 1.27   | 0.4969 | 0.5031 | 0.4969 | 0.5031 | 12346 | 24999 | 12655 | 12655 | 24999 | 12346 | 2.65   | 14.92  |
| 50000 | 0.99 | 0.5  | 0.5  | 12375 | 25000 | 12500 | 0.31   | 0.4969 | 0.5031 | 0.4969 | 0.5031 | 12346 | 24999 | 12655 | 12655 | 24999 | 12346 | 1.98   | 8.15   |
| 50000 | 1.00 | 0.5  | 0.5  | 12500 | 25000 | 12500 | 0.00   | 0.4969 | 0.5031 | 0.4969 | 0.5031 | 12346 | 24999 | 12655 | 12655 | 24999 | 12346 | 3.84   | 3.84   |
| 50000 | 1.01 | 0.5  | 0.5  | 12625 | 25000 | 12500 | 0.31   | 0.4969 | 0.5031 | 0.4969 | 0.5031 | 12346 | 24999 | 12655 | 12655 | 24999 | 12346 | 8.24   | 2.01   |
| 50000 | 1.02 | 0.5  | 0.5  | 12750 | 25000 | 12500 | 1.23   | 0.4969 | 0.5031 | 0.4969 | 0.5031 | 12346 | 24999 | 12655 | 12655 | 24999 | 12346 | 15.16  | 2.64   |
| 50000 | 1.03 | 0.5  | 0.5  | 12875 | 25000 | 12500 | 2.75   | 0.4969 | 0.5031 | 0.4969 | 0.5031 | 12346 | 24999 | 12655 | 12655 | 24999 | 12346 | 24.62  | 5.74   |
| 50000 | 1.04 | 0.5  | 0.5  | 13000 | 25000 | 12500 | 4.85   | 0.4969 | 0.5031 | 0.4969 | 0.5031 | 12346 | 24999 | 12655 | 12655 | 24999 | 12346 | 36.60  | 11.31  |
| 50000 | 1.05 | 0.5  | 0.5  | 13125 | 25000 | 12500 | 7.53   | 0.4969 | 0.5031 | 0.4969 | 0.5031 | 12346 | 24999 | 12655 | 12655 | 24999 | 12346 | 51.12  | 19.36  |
| 50000 | 1.06 | 0.5  | 0.5  | 13250 | 25000 | 12500 | 10.76  | 0.4969 | 0.5031 | 0.4969 | 0.5031 | 12346 | 24999 | 12655 | 12655 | 24999 | 12346 | 68.17  | 29.87  |
| 50000 | 1.07 | 0.5  | 0.5  | 13375 | 25000 | 12500 | 14.54  | 0.4969 | 0.5031 | 0.4969 | 0.5031 | 12346 | 24999 | 12655 | 12655 | 24999 | 12346 | 87.75  | 42.85  |
| 50000 | 1.08 | 0.5  | 0.5  | 13500 | 25000 | 12500 | 18.86  | 0.4969 | 0.5031 | 0.4969 | 0.5031 | 12346 | 24999 | 12655 | 12655 | 24999 | 12346 | 109.87 | 58.30  |
| 50000 | 1.09 | 0.5  | 0.5  | 13625 | 25000 | 12500 | 23.70  | 0.4969 | 0.5031 | 0.4969 | 0.5031 | 12346 | 24999 | 12655 | 12655 | 24999 | 12346 | 134.51 | 76.21  |
| 50000 | 1.10 | 0.5  | 0.5  | 13750 | 25000 | 12500 | 29.05  | 0.4969 | 0.5031 | 0.4969 | 0.5031 | 12346 | 24999 | 12655 | 12655 | 24999 | 12346 | 161.69 | 96.60  |
| 50000 | 1.11 | 0.5  | 0.5  | 13875 | 25000 | 12500 | 34.91  | 0.4969 | 0.5031 | 0.4969 | 0.5031 | 12346 | 24999 | 12655 | 12655 | 24999 | 12346 | 191.39 | 119.46 |
| 50000 | 1.12 | 0.5  | 0.5  | 14000 | 25000 | 12500 | 41.25  | 0.4969 | 0.5031 | 0.4969 | 0.5031 | 12346 | 24999 | 12655 | 12655 | 24999 | 12346 | 223.63 | 144.79 |

|       |      |      |      |       |       |       |        |        |        |        |        |       |       |       |       |       |       |        |        |
|-------|------|------|------|-------|-------|-------|--------|--------|--------|--------|--------|-------|-------|-------|-------|-------|-------|--------|--------|
| 50000 | 1.13 | 0.5  | 0.5  | 14125 | 25000 | 12500 | 48.08  | 0.4969 | 0.5031 | 0.4969 | 0.5031 | 12346 | 24999 | 12655 | 12655 | 24999 | 12346 | 258.40 | 172.58 |
| 50000 | 1.14 | 0.5  | 0.5  | 14250 | 25000 | 12500 | 55.37  | 0.4969 | 0.5031 | 0.4969 | 0.5031 | 12346 | 24999 | 12655 | 12655 | 24999 | 12346 | 295.70 | 202.85 |
| 50000 | 1.15 | 0.5  | 0.5  | 14375 | 25000 | 12500 | 63.13  | 0.4969 | 0.5031 | 0.4969 | 0.5031 | 12346 | 24999 | 12655 | 12655 | 24999 | 12346 | 335.53 | 235.58 |
| 50000 | 1.16 | 0.5  | 0.5  | 14500 | 25000 | 12500 | 71.33  | 0.4969 | 0.5031 | 0.4969 | 0.5031 | 12346 | 24999 | 12655 | 12655 | 24999 | 12346 | 377.90 | 270.78 |
| 50000 | 1.17 | 0.5  | 0.5  | 14625 | 25000 | 12500 | 79.98  | 0.4969 | 0.5031 | 0.4969 | 0.5031 | 12346 | 24999 | 12655 | 12655 | 24999 | 12346 | 422.79 | 308.46 |
| 50000 | 1.18 | 0.5  | 0.5  | 14750 | 25000 | 12500 | 89.06  | 0.4969 | 0.5031 | 0.4969 | 0.5031 | 12346 | 24999 | 12655 | 12655 | 24999 | 12346 | 470.21 | 348.60 |
| 50000 | 1.19 | 0.5  | 0.5  | 14875 | 25000 | 12500 | 98.56  | 0.4969 | 0.5031 | 0.4969 | 0.5031 | 12346 | 24999 | 12655 | 12655 | 24999 | 12346 | 520.17 | 391.21 |
| 50000 | 1.20 | 0.5  | 0.5  | 15000 | 25000 | 12500 | 108.47 | 0.4969 | 0.5031 | 0.4969 | 0.5031 | 12346 | 24999 | 12655 | 12655 | 24999 | 12346 | 572.66 | 436.29 |
| 50000 | 0.80 | 0.55 | 0.45 | 12100 | 24750 | 10125 | 145.31 | 0.5469 | 0.5531 | 0.4469 | 0.4531 | 14956 | 24780 | 10264 | 15295 | 24718 | 9987  | 547.27 | 669.39 |
| 50000 | 0.81 | 0.55 | 0.45 | 12251 | 24750 | 10125 | 129.95 | 0.5469 | 0.5531 | 0.4469 | 0.4531 | 14956 | 24780 | 10264 | 15295 | 24718 | 9987  | 491.03 | 607.70 |
| 50000 | 0.82 | 0.55 | 0.45 | 12403 | 24750 | 10125 | 115.58 | 0.5469 | 0.5531 | 0.4469 | 0.4531 | 14956 | 24780 | 10264 | 15295 | 24718 | 9987  | 437.86 | 548.99 |
| 50000 | 0.83 | 0.55 | 0.45 | 12554 | 24750 | 10125 | 102.18 | 0.5469 | 0.5531 | 0.4469 | 0.4531 | 14956 | 24780 | 10264 | 15295 | 24718 | 9987  | 387.74 | 493.28 |
| 50000 | 0.84 | 0.55 | 0.45 | 12705 | 24750 | 10125 | 89.71  | 0.5469 | 0.5531 | 0.4469 | 0.4531 | 14956 | 24780 | 10264 | 15295 | 24718 | 9987  | 340.69 | 440.56 |
| 50000 | 0.85 | 0.55 | 0.45 | 12856 | 24750 | 10125 | 78.15  | 0.5469 | 0.5531 | 0.4469 | 0.4531 | 14956 | 24780 | 10264 | 15295 | 24718 | 9987  | 296.69 | 390.83 |
| 50000 | 0.86 | 0.55 | 0.45 | 13008 | 24750 | 10125 | 67.48  | 0.5469 | 0.5531 | 0.4469 | 0.4531 | 14956 | 24780 | 10264 | 15295 | 24718 | 9987  | 255.75 | 344.09 |
| 50000 | 0.87 | 0.55 | 0.45 | 13159 | 24750 | 10125 | 57.68  | 0.5469 | 0.5531 | 0.4469 | 0.4531 | 14956 | 24780 | 10264 | 15295 | 24718 | 9987  | 217.87 | 300.34 |
| 50000 | 0.88 | 0.55 | 0.45 | 13310 | 24750 | 10125 | 48.72  | 0.5469 | 0.5531 | 0.4469 | 0.4531 | 14956 | 24780 | 10264 | 15295 | 24718 | 9987  | 183.05 | 259.59 |
| 50000 | 0.89 | 0.55 | 0.45 | 13461 | 24750 | 10125 | 40.59  | 0.5469 | 0.5531 | 0.4469 | 0.4531 | 14956 | 24780 | 10264 | 15295 | 24718 | 9987  | 151.29 | 221.82 |
| 50000 | 0.90 | 0.55 | 0.45 | 13613 | 24750 | 10125 | 33.26  | 0.5469 | 0.5531 | 0.4469 | 0.4531 | 14956 | 24780 | 10264 | 15295 | 24718 | 9987  | 122.59 | 187.05 |
| 50000 | 0.91 | 0.55 | 0.45 | 13764 | 24750 | 10125 | 26.71  | 0.5469 | 0.5531 | 0.4469 | 0.4531 | 14956 | 24780 | 10264 | 15295 | 24718 | 9987  | 96.95  | 155.27 |
| 50000 | 0.92 | 0.55 | 0.45 | 13915 | 24750 | 10125 | 20.93  | 0.5469 | 0.5531 | 0.4469 | 0.4531 | 14956 | 24780 | 10264 | 15295 | 24718 | 9987  | 74.37  | 126.48 |
| 50000 | 0.93 | 0.55 | 0.45 | 14066 | 24750 | 10125 | 15.89  | 0.5469 | 0.5531 | 0.4469 | 0.4531 | 14956 | 24780 | 10264 | 15295 | 24718 | 9987  | 54.84  | 100.68 |
| 50000 | 0.94 | 0.55 | 0.45 | 14218 | 24750 | 10125 | 11.58  | 0.5469 | 0.5531 | 0.4469 | 0.4531 | 14956 | 24780 | 10264 | 15295 | 24718 | 9987  | 38.38  | 77.87  |
| 50000 | 0.95 | 0.55 | 0.45 | 14369 | 24750 | 10125 | 7.97   | 0.5469 | 0.5531 | 0.4469 | 0.4531 | 14956 | 24780 | 10264 | 15295 | 24718 | 9987  | 24.97  | 58.06  |
| 50000 | 0.96 | 0.55 | 0.45 | 14520 | 24750 | 10125 | 5.06   | 0.5469 | 0.5531 | 0.4469 | 0.4531 | 14956 | 24780 | 10264 | 15295 | 24718 | 9987  | 14.63  | 41.23  |
| 50000 | 0.97 | 0.55 | 0.45 | 14671 | 24750 | 10125 | 2.82   | 0.5469 | 0.5531 | 0.4469 | 0.4531 | 14956 | 24780 | 10264 | 15295 | 24718 | 9987  | 7.34   | 27.40  |
| 50000 | 0.98 | 0.55 | 0.45 | 14823 | 24750 | 10125 | 1.24   | 0.5469 | 0.5531 | 0.4469 | 0.4531 | 14956 | 24780 | 10264 | 15295 | 24718 | 9987  | 3.11   | 16.56  |
| 50000 | 0.99 | 0.55 | 0.45 | 14974 | 24750 | 10125 | 0.31   | 0.5469 | 0.5531 | 0.4469 | 0.4531 | 14956 | 24780 | 10264 | 15295 | 24718 | 9987  | 1.95   | 8.71   |
| 50000 | 1.00 | 0.55 | 0.45 | 15125 | 24750 | 10125 | 0.00   | 0.5469 | 0.5531 | 0.4469 | 0.4531 | 14956 | 24780 | 10264 | 15295 | 24718 | 9987  | 3.84   | 3.85   |
| 50000 | 1.01 | 0.55 | 0.45 | 15276 | 24750 | 10125 | 0.30   | 0.5469 | 0.5531 | 0.4469 | 0.4531 | 14956 | 24780 | 10264 | 15295 | 24718 | 9987  | 8.79   | 1.98   |
| 50000 | 1.02 | 0.55 | 0.45 | 15428 | 24750 | 10125 | 1.21   | 0.5469 | 0.5531 | 0.4469 | 0.4531 | 14956 | 24780 | 10264 | 15295 | 24718 | 9987  | 16.80  | 3.10   |
| 50000 | 1.03 | 0.55 | 0.45 | 15579 | 24750 | 10125 | 2.69   | 0.5469 | 0.5531 | 0.4469 | 0.4531 | 14956 | 24780 | 10264 | 15295 | 24718 | 9987  | 27.87  | 7.22   |
| 50000 | 1.04 | 0.55 | 0.45 | 15730 | 24750 | 10125 | 4.75   | 0.5469 | 0.5531 | 0.4469 | 0.4531 | 14956 | 24780 | 10264 | 15295 | 24718 | 9987  | 41.99  | 14.32  |
| 50000 | 1.05 | 0.55 | 0.45 | 15881 | 24750 | 10125 | 7.36   | 0.5469 | 0.5531 | 0.4469 | 0.4531 | 14956 | 24780 | 10264 | 15295 | 24718 | 9987  | 59.18  | 24.42  |
| 50000 | 1.06 | 0.55 | 0.45 | 16033 | 24750 | 10125 | 10.52  | 0.5469 | 0.5531 | 0.4469 | 0.4531 | 14956 | 24780 | 10264 | 15295 | 24718 | 9987  | 79.43  | 37.51  |

|       |      |      |      |       |       |       |        |        |        |        |        |       |       |       |       |       |      |        |        |
|-------|------|------|------|-------|-------|-------|--------|--------|--------|--------|--------|-------|-------|-------|-------|-------|------|--------|--------|
| 50000 | 1.07 | 0.55 | 0.45 | 16184 | 24750 | 10125 | 14.21  | 0.5469 | 0.5531 | 0.4469 | 0.4531 | 14956 | 24780 | 10264 | 15295 | 24718 | 9987 | 102.73 | 53.59  |
| 50000 | 1.08 | 0.55 | 0.45 | 16335 | 24750 | 10125 | 18.42  | 0.5469 | 0.5531 | 0.4469 | 0.4531 | 14956 | 24780 | 10264 | 15295 | 24718 | 9987 | 129.10 | 72.66  |
| 50000 | 1.09 | 0.55 | 0.45 | 16486 | 24750 | 10125 | 23.14  | 0.5469 | 0.5531 | 0.4469 | 0.4531 | 14956 | 24780 | 10264 | 15295 | 24718 | 9987 | 158.52 | 94.73  |
| 50000 | 1.10 | 0.55 | 0.45 | 16638 | 24750 | 10125 | 28.35  | 0.5469 | 0.5531 | 0.4469 | 0.4531 | 14956 | 24780 | 10264 | 15295 | 24718 | 9987 | 191.00 | 119.78 |
| 50000 | 1.11 | 0.55 | 0.45 | 16789 | 24750 | 10125 | 34.05  | 0.5469 | 0.5531 | 0.4469 | 0.4531 | 14956 | 24780 | 10264 | 15295 | 24718 | 9987 | 226.55 | 147.83 |
| 50000 | 1.12 | 0.55 | 0.45 | 16940 | 24750 | 10125 | 40.22  | 0.5469 | 0.5531 | 0.4469 | 0.4531 | 14956 | 24780 | 10264 | 15295 | 24718 | 9987 | 265.15 | 178.86 |
| 50000 | 1.13 | 0.55 | 0.45 | 17091 | 24750 | 10125 | 46.86  | 0.5469 | 0.5531 | 0.4469 | 0.4531 | 14956 | 24780 | 10264 | 15295 | 24718 | 9987 | 306.81 | 212.89 |
| 50000 | 1.14 | 0.55 | 0.45 | 17243 | 24750 | 10125 | 53.95  | 0.5469 | 0.5531 | 0.4469 | 0.4531 | 14956 | 24780 | 10264 | 15295 | 24718 | 9987 | 351.53 | 249.91 |
| 50000 | 1.15 | 0.55 | 0.45 | 17394 | 24750 | 10125 | 61.48  | 0.5469 | 0.5531 | 0.4469 | 0.4531 | 14956 | 24780 | 10264 | 15295 | 24718 | 9987 | 399.31 | 289.92 |
| 50000 | 1.16 | 0.55 | 0.45 | 17545 | 24750 | 10125 | 69.44  | 0.5469 | 0.5531 | 0.4469 | 0.4531 | 14956 | 24780 | 10264 | 15295 | 24718 | 9987 | 450.14 | 332.92 |
| 50000 | 1.17 | 0.55 | 0.45 | 17696 | 24750 | 10125 | 77.83  | 0.5469 | 0.5531 | 0.4469 | 0.4531 | 14956 | 24780 | 10264 | 15295 | 24718 | 9987 | 504.04 | 378.92 |
| 50000 | 1.18 | 0.55 | 0.45 | 17848 | 24750 | 10125 | 86.64  | 0.5469 | 0.5531 | 0.4469 | 0.4531 | 14956 | 24780 | 10264 | 15295 | 24718 | 9987 | 561.00 | 427.90 |
| 50000 | 1.19 | 0.55 | 0.45 | 17999 | 24750 | 10125 | 95.84  | 0.5469 | 0.5531 | 0.4469 | 0.4531 | 14956 | 24780 | 10264 | 15295 | 24718 | 9987 | 621.01 | 479.88 |
| 50000 | 1.20 | 0.55 | 0.45 | 18150 | 24750 | 10125 | 105.45 | 0.5469 | 0.5531 | 0.4469 | 0.4531 | 14956 | 24780 | 10264 | 15295 | 24718 | 9987 | 684.09 | 534.85 |
| 50000 | 0.80 | 0.6  | 0.4  | 14400 | 24000 | 8000  | 138.05 | 0.5970 | 0.6030 | 0.3970 | 0.4030 | 17818 | 24060 | 8122  | 18183 | 23938 | 7879 | 657.74 | 788.94 |
| 50000 | 0.81 | 0.6  | 0.4  | 14580 | 24000 | 8000  | 123.38 | 0.5970 | 0.6030 | 0.3970 | 0.4030 | 17818 | 24060 | 8122  | 18183 | 23938 | 7879 | 590.50 | 715.83 |
| 50000 | 0.82 | 0.6  | 0.4  | 14760 | 24000 | 8000  | 109.68 | 0.5970 | 0.6030 | 0.3970 | 0.4030 | 17818 | 24060 | 8122  | 18183 | 23938 | 7879 | 526.89 | 646.29 |
| 50000 | 0.83 | 0.6  | 0.4  | 14940 | 24000 | 8000  | 96.90  | 0.5970 | 0.6030 | 0.3970 | 0.4030 | 17818 | 24060 | 8122  | 18183 | 23938 | 7879 | 466.92 | 580.30 |
| 50000 | 0.84 | 0.6  | 0.4  | 15120 | 24000 | 8000  | 85.02  | 0.5970 | 0.6030 | 0.3970 | 0.4030 | 17818 | 24060 | 8122  | 18183 | 23938 | 7879 | 410.59 | 517.88 |
| 50000 | 0.85 | 0.6  | 0.4  | 15300 | 24000 | 8000  | 74.03  | 0.5970 | 0.6030 | 0.3970 | 0.4030 | 17818 | 24060 | 8122  | 18183 | 23938 | 7879 | 357.89 | 459.03 |
| 50000 | 0.86 | 0.6  | 0.4  | 15480 | 24000 | 8000  | 63.88  | 0.5970 | 0.6030 | 0.3970 | 0.4030 | 17818 | 24060 | 8122  | 18183 | 23938 | 7879 | 308.83 | 403.73 |
| 50000 | 0.87 | 0.6  | 0.4  | 15660 | 24000 | 8000  | 54.58  | 0.5970 | 0.6030 | 0.3970 | 0.4030 | 17818 | 24060 | 8122  | 18183 | 23938 | 7879 | 263.40 | 352.01 |
| 50000 | 0.88 | 0.6  | 0.4  | 15840 | 24000 | 8000  | 46.08  | 0.5970 | 0.6030 | 0.3970 | 0.4030 | 17818 | 24060 | 8122  | 18183 | 23938 | 7879 | 221.62 | 303.84 |
| 50000 | 0.89 | 0.6  | 0.4  | 16020 | 24000 | 8000  | 38.37  | 0.5970 | 0.6030 | 0.3970 | 0.4030 | 17818 | 24060 | 8122  | 18183 | 23938 | 7879 | 183.47 | 259.24 |
| 50000 | 0.90 | 0.6  | 0.4  | 16200 | 24000 | 8000  | 31.42  | 0.5970 | 0.6030 | 0.3970 | 0.4030 | 17818 | 24060 | 8122  | 18183 | 23938 | 7879 | 148.95 | 218.21 |
| 50000 | 0.91 | 0.6  | 0.4  | 16380 | 24000 | 8000  | 25.22  | 0.5970 | 0.6030 | 0.3970 | 0.4030 | 17818 | 24060 | 8122  | 18183 | 23938 | 7879 | 118.08 | 180.73 |
| 50000 | 0.92 | 0.6  | 0.4  | 16560 | 24000 | 8000  | 19.75  | 0.5970 | 0.6030 | 0.3970 | 0.4030 | 17818 | 24060 | 8122  | 18183 | 23938 | 7879 | 90.83  | 146.82 |
| 50000 | 0.93 | 0.6  | 0.4  | 16740 | 24000 | 8000  | 14.99  | 0.5970 | 0.6030 | 0.3970 | 0.4030 | 17818 | 24060 | 8122  | 18183 | 23938 | 7879 | 67.23  | 116.48 |
| 50000 | 0.94 | 0.6  | 0.4  | 16920 | 24000 | 8000  | 10.92  | 0.5970 | 0.6030 | 0.3970 | 0.4030 | 17818 | 24060 | 8122  | 18183 | 23938 | 7879 | 47.26  | 89.70  |
| 50000 | 0.95 | 0.6  | 0.4  | 17100 | 24000 | 8000  | 7.51   | 0.5970 | 0.6030 | 0.3970 | 0.4030 | 17818 | 24060 | 8122  | 18183 | 23938 | 7879 | 30.93  | 66.48  |
| 50000 | 0.96 | 0.6  | 0.4  | 17280 | 24000 | 8000  | 4.77   | 0.5970 | 0.6030 | 0.3970 | 0.4030 | 17818 | 24060 | 8122  | 18183 | 23938 | 7879 | 18.24  | 46.83  |
| 50000 | 0.97 | 0.6  | 0.4  | 17460 | 24000 | 8000  | 2.66   | 0.5970 | 0.6030 | 0.3970 | 0.4030 | 17818 | 24060 | 8122  | 18183 | 23938 | 7879 | 9.18   | 30.74  |
| 50000 | 0.98 | 0.6  | 0.4  | 17640 | 24000 | 8000  | 1.17   | 0.5970 | 0.6030 | 0.3970 | 0.4030 | 17818 | 24060 | 8122  | 18183 | 23938 | 7879 | 3.76   | 18.21  |
| 50000 | 0.99 | 0.6  | 0.4  | 17820 | 24000 | 8000  | 0.29   | 0.5970 | 0.6030 | 0.3970 | 0.4030 | 17818 | 24060 | 8122  | 18183 | 23938 | 7879 | 1.98   | 9.25   |
| 50000 | 1.00 | 0.6  | 0.4  | 18000 | 24000 | 8000  | 0.00   | 0.5970 | 0.6030 | 0.3970 | 0.4030 | 17818 | 24060 | 8122  | 18183 | 23938 | 7879 | 3.83   | 3.85   |

|       |      |      |      |       |       |      |        |        |        |        |        |       |       |      |       |       |      |        |        |
|-------|------|------|------|-------|-------|------|--------|--------|--------|--------|--------|-------|-------|------|-------|-------|------|--------|--------|
| 50000 | 1.01 | 0.6  | 0.4  | 18180 | 24000 | 8000 | 0.29   | 0.5970 | 0.6030 | 0.3970 | 0.4030 | 17818 | 24060 | 8122 | 18183 | 23938 | 7879 | 9.32   | 2.02   |
| 50000 | 1.02 | 0.6  | 0.4  | 18360 | 24000 | 8000 | 1.13   | 0.5970 | 0.6030 | 0.3970 | 0.4030 | 17818 | 24060 | 8122 | 18183 | 23938 | 7879 | 18.45  | 3.75   |
| 50000 | 1.03 | 0.6  | 0.4  | 18540 | 24000 | 8000 | 2.53   | 0.5970 | 0.6030 | 0.3970 | 0.4030 | 17818 | 24060 | 8122 | 18183 | 23938 | 7879 | 31.21  | 9.04   |
| 50000 | 1.04 | 0.6  | 0.4  | 18720 | 24000 | 8000 | 4.46   | 0.5970 | 0.6030 | 0.3970 | 0.4030 | 17818 | 24060 | 8122 | 18183 | 23938 | 7879 | 47.61  | 17.90  |
| 50000 | 1.05 | 0.6  | 0.4  | 18900 | 24000 | 8000 | 6.91   | 0.5970 | 0.6030 | 0.3970 | 0.4030 | 17818 | 24060 | 8122 | 18183 | 23938 | 7879 | 67.65  | 30.32  |
| 50000 | 1.06 | 0.6  | 0.4  | 19080 | 24000 | 8000 | 9.87   | 0.5970 | 0.6030 | 0.3970 | 0.4030 | 17818 | 24060 | 8122 | 18183 | 23938 | 7879 | 91.32  | 46.30  |
| 50000 | 1.07 | 0.6  | 0.4  | 19260 | 24000 | 8000 | 13.32  | 0.5970 | 0.6030 | 0.3970 | 0.4030 | 17818 | 24060 | 8122 | 18183 | 23938 | 7879 | 118.63 | 65.85  |
| 50000 | 1.08 | 0.6  | 0.4  | 19440 | 24000 | 8000 | 17.27  | 0.5970 | 0.6030 | 0.3970 | 0.4030 | 17818 | 24060 | 8122 | 18183 | 23938 | 7879 | 149.58 | 88.96  |
| 50000 | 1.09 | 0.6  | 0.4  | 19620 | 24000 | 8000 | 21.68  | 0.5970 | 0.6030 | 0.3970 | 0.4030 | 17818 | 24060 | 8122 | 18183 | 23938 | 7879 | 184.16 | 115.64 |
| 50000 | 1.10 | 0.6  | 0.4  | 19800 | 24000 | 8000 | 26.55  | 0.5970 | 0.6030 | 0.3970 | 0.4030 | 17818 | 24060 | 8122 | 18183 | 23938 | 7879 | 222.38 | 145.88 |
| 50000 | 1.11 | 0.6  | 0.4  | 19980 | 24000 | 8000 | 31.88  | 0.5970 | 0.6030 | 0.3970 | 0.4030 | 17818 | 24060 | 8122 | 18183 | 23938 | 7879 | 264.24 | 179.69 |
| 50000 | 1.12 | 0.6  | 0.4  | 20160 | 24000 | 8000 | 37.65  | 0.5970 | 0.6030 | 0.3970 | 0.4030 | 17818 | 24060 | 8122 | 18183 | 23938 | 7879 | 309.73 | 217.05 |
| 50000 | 1.13 | 0.6  | 0.4  | 20340 | 24000 | 8000 | 43.84  | 0.5970 | 0.6030 | 0.3970 | 0.4030 | 17818 | 24060 | 8122 | 18183 | 23938 | 7879 | 358.86 | 257.98 |
| 50000 | 1.14 | 0.6  | 0.4  | 20520 | 24000 | 8000 | 50.46  | 0.5970 | 0.6030 | 0.3970 | 0.4030 | 17818 | 24060 | 8122 | 18183 | 23938 | 7879 | 411.63 | 302.48 |
| 50000 | 1.15 | 0.6  | 0.4  | 20700 | 24000 | 8000 | 57.49  | 0.5970 | 0.6030 | 0.3970 | 0.4030 | 17818 | 24060 | 8122 | 18183 | 23938 | 7879 | 468.04 | 350.54 |
| 50000 | 1.16 | 0.6  | 0.4  | 20880 | 24000 | 8000 | 64.91  | 0.5970 | 0.6030 | 0.3970 | 0.4030 | 17818 | 24060 | 8122 | 18183 | 23938 | 7879 | 528.08 | 402.16 |
| 50000 | 1.17 | 0.6  | 0.4  | 21060 | 24000 | 8000 | 72.73  | 0.5970 | 0.6030 | 0.3970 | 0.4030 | 17818 | 24060 | 8122 | 18183 | 23938 | 7879 | 591.75 | 457.35 |
| 50000 | 1.18 | 0.6  | 0.4  | 21240 | 24000 | 8000 | 80.93  | 0.5970 | 0.6030 | 0.3970 | 0.4030 | 17818 | 24060 | 8122 | 18183 | 23938 | 7879 | 659.07 | 516.10 |
| 50000 | 1.19 | 0.6  | 0.4  | 21420 | 24000 | 8000 | 89.51  | 0.5970 | 0.6030 | 0.3970 | 0.4030 | 17818 | 24060 | 8122 | 18183 | 23938 | 7879 | 730.02 | 578.42 |
| 50000 | 1.20 | 0.6  | 0.4  | 21600 | 24000 | 8000 | 98.45  | 0.5970 | 0.6030 | 0.3970 | 0.4030 | 17818 | 24060 | 8122 | 18183 | 23938 | 7879 | 804.61 | 644.29 |
| 50000 | 0.80 | 0.65 | 0.35 | 16900 | 22750 | 6125 | 125.20 | 0.6470 | 0.6530 | 0.3470 | 0.3530 | 20933 | 22838 | 6229 | 21318 | 22660 | 6022 | 779.17 | 917.56 |
| 50000 | 0.81 | 0.65 | 0.35 | 17111 | 22750 | 6125 | 111.84 | 0.6470 | 0.6530 | 0.3470 | 0.3530 | 20933 | 22838 | 6229 | 21318 | 22660 | 6022 | 699.90 | 832.10 |
| 50000 | 0.82 | 0.65 | 0.35 | 17323 | 22750 | 6125 | 99.36  | 0.6470 | 0.6530 | 0.3470 | 0.3530 | 20933 | 22838 | 6229 | 21318 | 22660 | 6022 | 624.89 | 750.83 |
| 50000 | 0.83 | 0.65 | 0.35 | 17534 | 22750 | 6125 | 87.73  | 0.6470 | 0.6530 | 0.3470 | 0.3530 | 20933 | 22838 | 6229 | 21318 | 22660 | 6022 | 554.15 | 673.74 |
| 50000 | 0.84 | 0.65 | 0.35 | 17745 | 22750 | 6125 | 76.94  | 0.6470 | 0.6530 | 0.3470 | 0.3530 | 20933 | 22838 | 6229 | 21318 | 22660 | 6022 | 487.67 | 600.84 |
| 50000 | 0.85 | 0.65 | 0.35 | 17956 | 22750 | 6125 | 66.96  | 0.6470 | 0.6530 | 0.3470 | 0.3530 | 20933 | 22838 | 6229 | 21318 | 22660 | 6022 | 425.45 | 532.13 |
| 50000 | 0.86 | 0.65 | 0.35 | 18168 | 22750 | 6125 | 57.75  | 0.6470 | 0.6530 | 0.3470 | 0.3530 | 20933 | 22838 | 6229 | 21318 | 22660 | 6022 | 367.50 | 467.61 |
| 50000 | 0.87 | 0.65 | 0.35 | 18379 | 22750 | 6125 | 49.31  | 0.6470 | 0.6530 | 0.3470 | 0.3530 | 20933 | 22838 | 6229 | 21318 | 22660 | 6022 | 313.80 | 407.27 |
| 50000 | 0.88 | 0.65 | 0.35 | 18590 | 22750 | 6125 | 41.61  | 0.6470 | 0.6530 | 0.3470 | 0.3530 | 20933 | 22838 | 6229 | 21318 | 22660 | 6022 | 264.38 | 351.11 |
| 50000 | 0.89 | 0.65 | 0.35 | 18801 | 22750 | 6125 | 34.63  | 0.6470 | 0.6530 | 0.3470 | 0.3530 | 20933 | 22838 | 6229 | 21318 | 22660 | 6022 | 219.22 | 299.15 |
| 50000 | 0.90 | 0.65 | 0.35 | 19013 | 22750 | 6125 | 28.35  | 0.6470 | 0.6530 | 0.3470 | 0.3530 | 20933 | 22838 | 6229 | 21318 | 22660 | 6022 | 178.32 | 251.37 |
| 50000 | 0.91 | 0.65 | 0.35 | 19224 | 22750 | 6125 | 22.75  | 0.6470 | 0.6530 | 0.3470 | 0.3530 | 20933 | 22838 | 6229 | 21318 | 22660 | 6022 | 141.68 | 207.78 |
| 50000 | 0.92 | 0.65 | 0.35 | 19435 | 22750 | 6125 | 17.81  | 0.6470 | 0.6530 | 0.3470 | 0.3530 | 20933 | 22838 | 6229 | 21318 | 22660 | 6022 | 109.31 | 168.37 |
| 50000 | 0.93 | 0.65 | 0.35 | 19646 | 22750 | 6125 | 13.51  | 0.6470 | 0.6530 | 0.3470 | 0.3530 | 20933 | 22838 | 6229 | 21318 | 22660 | 6022 | 81.20  | 133.15 |
| 50000 | 0.94 | 0.65 | 0.35 | 19858 | 22750 | 6125 | 9.83   | 0.6470 | 0.6530 | 0.3470 | 0.3530 | 20933 | 22838 | 6229 | 21318 | 22660 | 6022 | 57.36  | 102.12 |

|       |      |      |      |       |       |      |        |        |        |        |        |       |       |      |       |       |      |        |         |
|-------|------|------|------|-------|-------|------|--------|--------|--------|--------|--------|-------|-------|------|-------|-------|------|--------|---------|
| 50000 | 0.95 | 0.65 | 0.35 | 20069 | 22750 | 6125 | 6.77   | 0.6470 | 0.6530 | 0.3470 | 0.3530 | 20933 | 22838 | 6229 | 21318 | 22660 | 6022 | 37.78  | 75.28   |
| 50000 | 0.96 | 0.65 | 0.35 | 20280 | 22750 | 6125 | 4.29   | 0.6470 | 0.6530 | 0.3470 | 0.3530 | 20933 | 22838 | 6229 | 21318 | 22660 | 6022 | 22.46  | 52.62   |
| 50000 | 0.97 | 0.65 | 0.35 | 20491 | 22750 | 6125 | 2.39   | 0.6470 | 0.6530 | 0.3470 | 0.3530 | 20933 | 22838 | 6229 | 21318 | 22660 | 6022 | 11.40  | 34.15   |
| 50000 | 0.98 | 0.65 | 0.35 | 20703 | 22750 | 6125 | 1.05   | 0.6470 | 0.6530 | 0.3470 | 0.3530 | 20933 | 22838 | 6229 | 21318 | 22660 | 6022 | 4.62   | 19.86   |
| 50000 | 0.99 | 0.65 | 0.35 | 20914 | 22750 | 6125 | 0.26   | 0.6470 | 0.6530 | 0.3470 | 0.3530 | 20933 | 22838 | 6229 | 21318 | 22660 | 6022 | 2.09   | 9.77    |
| 50000 | 1.00 | 0.65 | 0.35 | 21125 | 22750 | 6125 | 0.00   | 0.6470 | 0.6530 | 0.3470 | 0.3530 | 20933 | 22838 | 6229 | 21318 | 22660 | 6022 | 3.83   | 3.86    |
| 50000 | 1.01 | 0.65 | 0.35 | 21336 | 22750 | 6125 | 0.26   | 0.6470 | 0.6530 | 0.3470 | 0.3530 | 20933 | 22838 | 6229 | 21318 | 22660 | 6022 | 9.83   | 2.13    |
| 50000 | 1.02 | 0.65 | 0.35 | 21548 | 22750 | 6125 | 1.02   | 0.6470 | 0.6530 | 0.3470 | 0.3530 | 20933 | 22838 | 6229 | 21318 | 22660 | 6022 | 20.09  | 4.60    |
| 50000 | 1.03 | 0.65 | 0.35 | 21759 | 22750 | 6125 | 2.27   | 0.6470 | 0.6530 | 0.3470 | 0.3530 | 20933 | 22838 | 6229 | 21318 | 22660 | 6022 | 34.62  | 11.25   |
| 50000 | 1.04 | 0.65 | 0.35 | 21970 | 22750 | 6125 | 4.00   | 0.6470 | 0.6530 | 0.3470 | 0.3530 | 20933 | 22838 | 6229 | 21318 | 22660 | 6022 | 53.41  | 22.08   |
| 50000 | 1.05 | 0.65 | 0.35 | 22181 | 22750 | 6125 | 6.20   | 0.6470 | 0.6530 | 0.3470 | 0.3530 | 20933 | 22838 | 6229 | 21318 | 22660 | 6022 | 76.47  | 37.11   |
| 50000 | 1.06 | 0.65 | 0.35 | 22393 | 22750 | 6125 | 8.85   | 0.6470 | 0.6530 | 0.3470 | 0.3530 | 20933 | 22838 | 6229 | 21318 | 22660 | 6022 | 103.79 | 56.32   |
| 50000 | 1.07 | 0.65 | 0.35 | 22604 | 22750 | 6125 | 11.94  | 0.6470 | 0.6530 | 0.3470 | 0.3530 | 20933 | 22838 | 6229 | 21318 | 22660 | 6022 | 135.37 | 79.71   |
| 50000 | 1.08 | 0.65 | 0.35 | 22815 | 22750 | 6125 | 15.47  | 0.6470 | 0.6530 | 0.3470 | 0.3530 | 20933 | 22838 | 6229 | 21318 | 22660 | 6022 | 171.22 | 107.30  |
| 50000 | 1.09 | 0.65 | 0.35 | 23026 | 22750 | 6125 | 19.42  | 0.6470 | 0.6530 | 0.3470 | 0.3530 | 20933 | 22838 | 6229 | 21318 | 22660 | 6022 | 211.33 | 139.07  |
| 50000 | 1.10 | 0.65 | 0.35 | 23238 | 22750 | 6125 | 23.78  | 0.6470 | 0.6530 | 0.3470 | 0.3530 | 20933 | 22838 | 6229 | 21318 | 22660 | 6022 | 255.71 | 175.03  |
| 50000 | 1.11 | 0.65 | 0.35 | 23449 | 22750 | 6125 | 28.54  | 0.6470 | 0.6530 | 0.3470 | 0.3530 | 20933 | 22838 | 6229 | 21318 | 22660 | 6022 | 304.35 | 215.17  |
| 50000 | 1.12 | 0.65 | 0.35 | 23660 | 22750 | 6125 | 33.69  | 0.6470 | 0.6530 | 0.3470 | 0.3530 | 20933 | 22838 | 6229 | 21318 | 22660 | 6022 | 357.25 | 259.50  |
| 50000 | 1.13 | 0.65 | 0.35 | 23871 | 22750 | 6125 | 39.23  | 0.6470 | 0.6530 | 0.3470 | 0.3530 | 20933 | 22838 | 6229 | 21318 | 22660 | 6022 | 414.41 | 308.02  |
| 50000 | 1.14 | 0.65 | 0.35 | 24083 | 22750 | 6125 | 45.13  | 0.6470 | 0.6530 | 0.3470 | 0.3530 | 20933 | 22838 | 6229 | 21318 | 22660 | 6022 | 475.84 | 360.73  |
| 50000 | 1.15 | 0.65 | 0.35 | 24294 | 22750 | 6125 | 51.40  | 0.6470 | 0.6530 | 0.3470 | 0.3530 | 20933 | 22838 | 6229 | 21318 | 22660 | 6022 | 541.54 | 417.62  |
| 50000 | 1.16 | 0.65 | 0.35 | 24505 | 22750 | 6125 | 58.03  | 0.6470 | 0.6530 | 0.3470 | 0.3530 | 20933 | 22838 | 6229 | 21318 | 22660 | 6022 | 611.49 | 478.70  |
| 50000 | 1.17 | 0.65 | 0.35 | 24716 | 22750 | 6125 | 65.00  | 0.6470 | 0.6530 | 0.3470 | 0.3530 | 20933 | 22838 | 6229 | 21318 | 22660 | 6022 | 685.71 | 543.96  |
| 50000 | 1.18 | 0.65 | 0.35 | 24928 | 22750 | 6125 | 72.31  | 0.6470 | 0.6530 | 0.3470 | 0.3530 | 20933 | 22838 | 6229 | 21318 | 22660 | 6022 | 764.20 | 613.42  |
| 50000 | 1.19 | 0.65 | 0.35 | 25139 | 22750 | 6125 | 79.95  | 0.6470 | 0.6530 | 0.3470 | 0.3530 | 20933 | 22838 | 6229 | 21318 | 22660 | 6022 | 846.95 | 687.05  |
| 50000 | 1.20 | 0.65 | 0.35 | 25350 | 22750 | 6125 | 87.92  | 0.6470 | 0.6530 | 0.3470 | 0.3530 | 20933 | 22838 | 6229 | 21318 | 22660 | 6022 | 933.96 | 764.88  |
| 50000 | 0.80 | 0.7  | 0.3  | 19600 | 21000 | 4500 | 107.57 | 0.6972 | 0.7028 | 0.2972 | 0.3028 | 24302 | 21113 | 4586 | 24699 | 20886 | 4415 | 911.81 | 1055.01 |
| 50000 | 0.81 | 0.7  | 0.3  | 19845 | 21000 | 4500 | 96.04  | 0.6972 | 0.7028 | 0.2972 | 0.3028 | 24302 | 21113 | 4586 | 24699 | 20886 | 4415 | 819.48 | 956.27  |
| 50000 | 0.82 | 0.7  | 0.3  | 20090 | 21000 | 4500 | 85.28  | 0.6972 | 0.7028 | 0.2972 | 0.3028 | 24302 | 21113 | 4586 | 24699 | 20886 | 4415 | 732.09 | 862.40  |
| 50000 | 0.83 | 0.7  | 0.3  | 20335 | 21000 | 4500 | 75.26  | 0.6972 | 0.7028 | 0.2972 | 0.3028 | 24302 | 21113 | 4586 | 24699 | 20886 | 4415 | 649.64 | 773.39  |
| 50000 | 0.84 | 0.7  | 0.3  | 20580 | 21000 | 4500 | 65.97  | 0.6972 | 0.7028 | 0.2972 | 0.3028 | 24302 | 21113 | 4586 | 24699 | 20886 | 4415 | 572.13 | 689.24  |
| 50000 | 0.85 | 0.7  | 0.3  | 20825 | 21000 | 4500 | 57.38  | 0.6972 | 0.7028 | 0.2972 | 0.3028 | 24302 | 21113 | 4586 | 24699 | 20886 | 4415 | 499.56 | 609.95  |
| 50000 | 0.86 | 0.7  | 0.3  | 21070 | 21000 | 4500 | 49.48  | 0.6972 | 0.7028 | 0.2972 | 0.3028 | 24302 | 21113 | 4586 | 24699 | 20886 | 4415 | 431.93 | 535.52  |
| 50000 | 0.87 | 0.7  | 0.3  | 21315 | 21000 | 4500 | 42.23  | 0.6972 | 0.7028 | 0.2972 | 0.3028 | 24302 | 21113 | 4586 | 24699 | 20886 | 4415 | 369.24 | 465.95  |
| 50000 | 0.88 | 0.7  | 0.3  | 21560 | 21000 | 4500 | 35.62  | 0.6972 | 0.7028 | 0.2972 | 0.3028 | 24302 | 21113 | 4586 | 24699 | 20886 | 4415 | 311.49 | 401.25  |

|       |      |      |      |       |       |      |       |        |        |        |        |       |       |      |       |       |      |         |         |
|-------|------|------|------|-------|-------|------|-------|--------|--------|--------|--------|-------|-------|------|-------|-------|------|---------|---------|
| 50000 | 0.89 | 0.7  | 0.3  | 21805 | 21000 | 4500 | 29.63 | 0.6972 | 0.7028 | 0.2972 | 0.3028 | 24302 | 21113 | 4586 | 24699 | 20886 | 4415 | 258.68  | 341.40  |
| 50000 | 0.90 | 0.7  | 0.3  | 22050 | 21000 | 4500 | 24.25 | 0.6972 | 0.7028 | 0.2972 | 0.3028 | 24302 | 21113 | 4586 | 24699 | 20886 | 4415 | 210.81  | 286.41  |
| 50000 | 0.91 | 0.7  | 0.3  | 22295 | 21000 | 4500 | 19.45 | 0.6972 | 0.7028 | 0.2972 | 0.3028 | 24302 | 21113 | 4586 | 24699 | 20886 | 4415 | 167.88  | 236.28  |
| 50000 | 0.92 | 0.7  | 0.3  | 22540 | 21000 | 4500 | 15.22 | 0.6972 | 0.7028 | 0.2972 | 0.3028 | 24302 | 21113 | 4586 | 24699 | 20886 | 4415 | 129.90  | 191.02  |
| 50000 | 0.93 | 0.7  | 0.3  | 22785 | 21000 | 4500 | 11.54 | 0.6972 | 0.7028 | 0.2972 | 0.3028 | 24302 | 21113 | 4586 | 24699 | 20886 | 4415 | 96.85   | 150.61  |
| 50000 | 0.94 | 0.7  | 0.3  | 23030 | 21000 | 4500 | 8.39  | 0.6972 | 0.7028 | 0.2972 | 0.3028 | 24302 | 21113 | 4586 | 24699 | 20886 | 4415 | 68.74   | 115.07  |
| 50000 | 0.95 | 0.7  | 0.3  | 23275 | 21000 | 4500 | 5.77  | 0.6972 | 0.7028 | 0.2972 | 0.3028 | 24302 | 21113 | 4586 | 24699 | 20886 | 4415 | 45.57   | 84.38   |
| 50000 | 0.96 | 0.7  | 0.3  | 23520 | 21000 | 4500 | 3.66  | 0.6972 | 0.7028 | 0.2972 | 0.3028 | 24302 | 21113 | 4586 | 24699 | 20886 | 4415 | 27.34   | 58.56   |
| 50000 | 0.97 | 0.7  | 0.3  | 23765 | 21000 | 4500 | 2.04  | 0.6972 | 0.7028 | 0.2972 | 0.3028 | 24302 | 21113 | 4586 | 24699 | 20886 | 4415 | 14.05   | 37.59   |
| 50000 | 0.98 | 0.7  | 0.3  | 24010 | 21000 | 4500 | 0.90  | 0.6972 | 0.7028 | 0.2972 | 0.3028 | 24302 | 21113 | 4586 | 24699 | 20886 | 4415 | 5.70    | 21.49   |
| 50000 | 0.99 | 0.7  | 0.3  | 24255 | 21000 | 4500 | 0.22  | 0.6972 | 0.7028 | 0.2972 | 0.3028 | 24302 | 21113 | 4586 | 24699 | 20886 | 4415 | 2.29    | 10.25   |
| 50000 | 1.00 | 0.7  | 0.3  | 24500 | 21000 | 4500 | 0.00  | 0.6972 | 0.7028 | 0.2972 | 0.3028 | 24302 | 21113 | 4586 | 24699 | 20886 | 4415 | 3.82    | 3.86    |
| 50000 | 1.01 | 0.7  | 0.3  | 24745 | 21000 | 4500 | 0.22  | 0.6972 | 0.7028 | 0.2972 | 0.3028 | 24302 | 21113 | 4586 | 24699 | 20886 | 4415 | 10.29   | 2.34    |
| 50000 | 1.02 | 0.7  | 0.3  | 24990 | 21000 | 4500 | 0.87  | 0.6972 | 0.7028 | 0.2972 | 0.3028 | 24302 | 21113 | 4586 | 24699 | 20886 | 4415 | 21.70   | 5.68    |
| 50000 | 1.03 | 0.7  | 0.3  | 25235 | 21000 | 4500 | 1.93  | 0.6972 | 0.7028 | 0.2972 | 0.3028 | 24302 | 21113 | 4586 | 24699 | 20886 | 4415 | 38.05   | 13.88   |
| 50000 | 1.04 | 0.7  | 0.3  | 25480 | 21000 | 4500 | 3.40  | 0.6972 | 0.7028 | 0.2972 | 0.3028 | 24302 | 21113 | 4586 | 24699 | 20886 | 4415 | 59.34   | 26.94   |
| 50000 | 1.05 | 0.7  | 0.3  | 25725 | 21000 | 4500 | 5.27  | 0.6972 | 0.7028 | 0.2972 | 0.3028 | 24302 | 21113 | 4586 | 24699 | 20886 | 4415 | 85.58   | 44.86   |
| 50000 | 1.06 | 0.7  | 0.3  | 25970 | 21000 | 4500 | 7.53  | 0.6972 | 0.7028 | 0.2972 | 0.3028 | 24302 | 21113 | 4586 | 24699 | 20886 | 4415 | 116.75  | 67.64   |
| 50000 | 1.07 | 0.7  | 0.3  | 26215 | 21000 | 4500 | 10.16 | 0.6972 | 0.7028 | 0.2972 | 0.3028 | 24302 | 21113 | 4586 | 24699 | 20886 | 4415 | 152.86  | 95.28   |
| 50000 | 1.08 | 0.7  | 0.3  | 26460 | 21000 | 4500 | 13.15 | 0.6972 | 0.7028 | 0.2972 | 0.3028 | 24302 | 21113 | 4586 | 24699 | 20886 | 4415 | 193.91  | 127.78  |
| 50000 | 1.09 | 0.7  | 0.3  | 26705 | 21000 | 4500 | 16.50 | 0.6972 | 0.7028 | 0.2972 | 0.3028 | 24302 | 21113 | 4586 | 24699 | 20886 | 4415 | 239.90  | 165.14  |
| 50000 | 1.10 | 0.7  | 0.3  | 26950 | 21000 | 4500 | 20.20 | 0.6972 | 0.7028 | 0.2972 | 0.3028 | 24302 | 21113 | 4586 | 24699 | 20886 | 4415 | 290.83  | 207.36  |
| 50000 | 1.11 | 0.7  | 0.3  | 27195 | 21000 | 4500 | 24.24 | 0.6972 | 0.7028 | 0.2972 | 0.3028 | 24302 | 21113 | 4586 | 24699 | 20886 | 4415 | 346.70  | 254.45  |
| 50000 | 1.12 | 0.7  | 0.3  | 27440 | 21000 | 4500 | 28.61 | 0.6972 | 0.7028 | 0.2972 | 0.3028 | 24302 | 21113 | 4586 | 24699 | 20886 | 4415 | 407.51  | 306.39  |
| 50000 | 1.13 | 0.7  | 0.3  | 27685 | 21000 | 4500 | 33.30 | 0.6972 | 0.7028 | 0.2972 | 0.3028 | 24302 | 21113 | 4586 | 24699 | 20886 | 4415 | 473.26  | 363.19  |
| 50000 | 1.14 | 0.7  | 0.3  | 27930 | 21000 | 4500 | 38.31 | 0.6972 | 0.7028 | 0.2972 | 0.3028 | 24302 | 21113 | 4586 | 24699 | 20886 | 4415 | 543.95  | 424.86  |
| 50000 | 1.15 | 0.7  | 0.3  | 28175 | 21000 | 4500 | 43.62 | 0.6972 | 0.7028 | 0.2972 | 0.3028 | 24302 | 21113 | 4586 | 24699 | 20886 | 4415 | 619.58  | 491.38  |
| 50000 | 1.16 | 0.7  | 0.3  | 28420 | 21000 | 4500 | 49.23 | 0.6972 | 0.7028 | 0.2972 | 0.3028 | 24302 | 21113 | 4586 | 24699 | 20886 | 4415 | 700.15  | 562.77  |
| 50000 | 1.17 | 0.7  | 0.3  | 28665 | 21000 | 4500 | 55.13 | 0.6972 | 0.7028 | 0.2972 | 0.3028 | 24302 | 21113 | 4586 | 24699 | 20886 | 4415 | 785.67  | 639.01  |
| 50000 | 1.18 | 0.7  | 0.3  | 28910 | 21000 | 4500 | 61.32 | 0.6972 | 0.7028 | 0.2972 | 0.3028 | 24302 | 21113 | 4586 | 24699 | 20886 | 4415 | 876.12  | 720.12  |
| 50000 | 1.19 | 0.7  | 0.3  | 29155 | 21000 | 4500 | 67.78 | 0.6972 | 0.7028 | 0.2972 | 0.3028 | 24302 | 21113 | 4586 | 24699 | 20886 | 4415 | 971.51  | 806.08  |
| 50000 | 1.20 | 0.7  | 0.3  | 29400 | 21000 | 4500 | 74.52 | 0.6972 | 0.7028 | 0.2972 | 0.3028 | 24302 | 21113 | 4586 | 24699 | 20886 | 4415 | 1071.84 | 896.91  |
| 50000 | 0.80 | 0.75 | 0.25 | 22500 | 18750 | 3125 | 86.37 | 0.7473 | 0.7527 | 0.2473 | 0.2527 | 27924 | 18883 | 3192 | 28327 | 18615 | 3058 | 1055.96 | 1200.95 |
| 50000 | 0.81 | 0.75 | 0.25 | 22781 | 18750 | 3125 | 77.08 | 0.7473 | 0.7527 | 0.2473 | 0.2527 | 27924 | 18883 | 3192 | 28327 | 18615 | 3058 | 949.53  | 1088.04 |
| 50000 | 0.82 | 0.75 | 0.25 | 23063 | 18750 | 3125 | 68.41 | 0.7473 | 0.7527 | 0.2473 | 0.2527 | 27924 | 18883 | 3192 | 28327 | 18615 | 3058 | 848.77  | 980.71  |

|       |      |      |      |       |       |      |       |        |        |        |        |       |       |      |       |       |      |        |        |
|-------|------|------|------|-------|-------|------|-------|--------|--------|--------|--------|-------|-------|------|-------|-------|------|--------|--------|
| 50000 | 0.83 | 0.75 | 0.25 | 23344 | 18750 | 3125 | 60.35 | 0.7473 | 0.7527 | 0.2473 | 0.2527 | 27924 | 18883 | 3192 | 28327 | 18615 | 3058 | 753.67 | 878.97 |
| 50000 | 0.84 | 0.75 | 0.25 | 23625 | 18750 | 3125 | 52.88 | 0.7473 | 0.7527 | 0.2473 | 0.2527 | 27924 | 18883 | 3192 | 28327 | 18615 | 3058 | 664.24 | 782.81 |
| 50000 | 0.85 | 0.75 | 0.25 | 23906 | 18750 | 3125 | 45.98 | 0.7473 | 0.7527 | 0.2473 | 0.2527 | 27924 | 18883 | 3192 | 28327 | 18615 | 3058 | 580.47 | 692.24 |
| 50000 | 0.86 | 0.75 | 0.25 | 24188 | 18750 | 3125 | 39.62 | 0.7473 | 0.7527 | 0.2473 | 0.2527 | 27924 | 18883 | 3192 | 28327 | 18615 | 3058 | 502.37 | 607.25 |
| 50000 | 0.87 | 0.75 | 0.25 | 24469 | 18750 | 3125 | 33.81 | 0.7473 | 0.7527 | 0.2473 | 0.2527 | 27924 | 18883 | 3192 | 28327 | 18615 | 3058 | 429.93 | 527.85 |
| 50000 | 0.88 | 0.75 | 0.25 | 24750 | 18750 | 3125 | 28.50 | 0.7473 | 0.7527 | 0.2473 | 0.2527 | 27924 | 18883 | 3192 | 28327 | 18615 | 3058 | 363.16 | 454.04 |
| 50000 | 0.89 | 0.75 | 0.25 | 25031 | 18750 | 3125 | 23.70 | 0.7473 | 0.7527 | 0.2473 | 0.2527 | 27924 | 18883 | 3192 | 28327 | 18615 | 3058 | 302.05 | 385.81 |
| 50000 | 0.90 | 0.75 | 0.25 | 25313 | 18750 | 3125 | 19.39 | 0.7473 | 0.7527 | 0.2473 | 0.2527 | 27924 | 18883 | 3192 | 28327 | 18615 | 3058 | 246.61 | 323.16 |
| 50000 | 0.91 | 0.75 | 0.25 | 25594 | 18750 | 3125 | 15.55 | 0.7473 | 0.7527 | 0.2473 | 0.2527 | 27924 | 18883 | 3192 | 28327 | 18615 | 3058 | 196.84 | 266.10 |
| 50000 | 0.92 | 0.75 | 0.25 | 25875 | 18750 | 3125 | 12.16 | 0.7473 | 0.7527 | 0.2473 | 0.2527 | 27924 | 18883 | 3192 | 28327 | 18615 | 3058 | 152.73 | 214.62 |
| 50000 | 0.93 | 0.75 | 0.25 | 26156 | 18750 | 3125 | 9.22  | 0.7473 | 0.7527 | 0.2473 | 0.2527 | 27924 | 18883 | 3192 | 28327 | 18615 | 3058 | 114.29 | 168.73 |
| 50000 | 0.94 | 0.75 | 0.25 | 26438 | 18750 | 3125 | 6.70  | 0.7473 | 0.7527 | 0.2473 | 0.2527 | 27924 | 18883 | 3192 | 28327 | 18615 | 3058 | 81.51  | 128.42 |
| 50000 | 0.95 | 0.75 | 0.25 | 26719 | 18750 | 3125 | 4.61  | 0.7473 | 0.7527 | 0.2473 | 0.2527 | 27924 | 18883 | 3192 | 28327 | 18615 | 3058 | 54.40  | 93.70  |
| 50000 | 0.96 | 0.75 | 0.25 | 27000 | 18750 | 3125 | 2.92  | 0.7473 | 0.7527 | 0.2473 | 0.2527 | 27924 | 18883 | 3192 | 28327 | 18615 | 3058 | 32.95  | 64.57  |
| 50000 | 0.97 | 0.75 | 0.25 | 27281 | 18750 | 3125 | 1.63  | 0.7473 | 0.7527 | 0.2473 | 0.2527 | 27924 | 18883 | 3192 | 28327 | 18615 | 3058 | 17.17  | 41.01  |
| 50000 | 0.98 | 0.75 | 0.25 | 27563 | 18750 | 3125 | 0.72  | 0.7473 | 0.7527 | 0.2473 | 0.2527 | 27924 | 18883 | 3192 | 28327 | 18615 | 3058 | 7.05   | 23.05  |
| 50000 | 0.99 | 0.75 | 0.25 | 27844 | 18750 | 3125 | 0.18  | 0.7473 | 0.7527 | 0.2473 | 0.2527 | 27924 | 18883 | 3192 | 28327 | 18615 | 3058 | 2.60   | 10.67  |
| 50000 | 1.00 | 0.75 | 0.25 | 28125 | 18750 | 3125 | 0.00  | 0.7473 | 0.7527 | 0.2473 | 0.2527 | 27924 | 18883 | 3192 | 28327 | 18615 | 3058 | 3.81   | 3.87   |
| 50000 | 1.01 | 0.75 | 0.25 | 28406 | 18750 | 3125 | 0.17  | 0.7473 | 0.7527 | 0.2473 | 0.2527 | 27924 | 18883 | 3192 | 28327 | 18615 | 3058 | 10.69  | 2.66   |
| 50000 | 1.02 | 0.75 | 0.25 | 28688 | 18750 | 3125 | 0.69  | 0.7473 | 0.7527 | 0.2473 | 0.2527 | 27924 | 18883 | 3192 | 28327 | 18615 | 3058 | 23.24  | 7.03   |
| 50000 | 1.03 | 0.75 | 0.25 | 28969 | 18750 | 3125 | 1.54  | 0.7473 | 0.7527 | 0.2473 | 0.2527 | 27924 | 18883 | 3192 | 28327 | 18615 | 3058 | 41.45  | 16.99  |
| 50000 | 1.04 | 0.75 | 0.25 | 29250 | 18750 | 3125 | 2.71  | 0.7473 | 0.7527 | 0.2473 | 0.2527 | 27924 | 18883 | 3192 | 28327 | 18615 | 3058 | 65.33  | 32.53  |
| 50000 | 1.05 | 0.75 | 0.25 | 29531 | 18750 | 3125 | 4.20  | 0.7473 | 0.7527 | 0.2473 | 0.2527 | 27924 | 18883 | 3192 | 28327 | 18615 | 3058 | 94.87  | 53.66  |
| 50000 | 1.06 | 0.75 | 0.25 | 29813 | 18750 | 3125 | 5.99  | 0.7473 | 0.7527 | 0.2473 | 0.2527 | 27924 | 18883 | 3192 | 28327 | 18615 | 3058 | 130.08 | 80.37  |
| 50000 | 1.07 | 0.75 | 0.25 | 30094 | 18750 | 3125 | 8.08  | 0.7473 | 0.7527 | 0.2473 | 0.2527 | 27924 | 18883 | 3192 | 28327 | 18615 | 3058 | 170.95 | 112.67 |
| 50000 | 1.08 | 0.75 | 0.25 | 30375 | 18750 | 3125 | 10.46 | 0.7473 | 0.7527 | 0.2473 | 0.2527 | 27924 | 18883 | 3192 | 28327 | 18615 | 3058 | 217.49 | 150.55 |
| 50000 | 1.09 | 0.75 | 0.25 | 30656 | 18750 | 3125 | 13.13 | 0.7473 | 0.7527 | 0.2473 | 0.2527 | 27924 | 18883 | 3192 | 28327 | 18615 | 3058 | 269.69 | 194.02 |
| 50000 | 1.10 | 0.75 | 0.25 | 30938 | 18750 | 3125 | 16.07 | 0.7473 | 0.7527 | 0.2473 | 0.2527 | 27924 | 18883 | 3192 | 28327 | 18615 | 3058 | 327.56 | 243.07 |
| 50000 | 1.11 | 0.75 | 0.25 | 31219 | 18750 | 3125 | 19.27 | 0.7473 | 0.7527 | 0.2473 | 0.2527 | 27924 | 18883 | 3192 | 28327 | 18615 | 3058 | 391.10 | 297.71 |
| 50000 | 1.12 | 0.75 | 0.25 | 31500 | 18750 | 3125 | 22.74 | 0.7473 | 0.7527 | 0.2473 | 0.2527 | 27924 | 18883 | 3192 | 28327 | 18615 | 3058 | 460.30 | 357.94 |
| 50000 | 1.13 | 0.75 | 0.25 | 31781 | 18750 | 3125 | 26.47 | 0.7473 | 0.7527 | 0.2473 | 0.2527 | 27924 | 18883 | 3192 | 28327 | 18615 | 3058 | 535.16 | 423.74 |
| 50000 | 1.14 | 0.75 | 0.25 | 32063 | 18750 | 3125 | 30.44 | 0.7473 | 0.7527 | 0.2473 | 0.2527 | 27924 | 18883 | 3192 | 28327 | 18615 | 3058 | 615.70 | 495.14 |
| 50000 | 1.15 | 0.75 | 0.25 | 32344 | 18750 | 3125 | 34.65 | 0.7473 | 0.7527 | 0.2473 | 0.2527 | 27924 | 18883 | 3192 | 28327 | 18615 | 3058 | 701.89 | 572.11 |
| 50000 | 1.16 | 0.75 | 0.25 | 32625 | 18750 | 3125 | 39.10 | 0.7473 | 0.7527 | 0.2473 | 0.2527 | 27924 | 18883 | 3192 | 28327 | 18615 | 3058 | 793.75 | 654.68 |
| 50000 | 1.17 | 0.75 | 0.25 | 32906 | 18750 | 3125 | 43.78 | 0.7473 | 0.7527 | 0.2473 | 0.2527 | 27924 | 18883 | 3192 | 28327 | 18615 | 3058 | 891.28 | 742.82 |



|       |      |      |      |       |       |      |       |        |        |        |        |       |       |      |       |       |      |         |         |
|-------|------|------|------|-------|-------|------|-------|--------|--------|--------|--------|-------|-------|------|-------|-------|------|---------|---------|
| 50000 | 1.18 | 0.75 | 0.25 | 33188 | 18750 | 3125 | 48.69 | 0.7473 | 0.7527 | 0.2473 | 0.2527 | 27924 | 18883 | 3192 | 28327 | 18615 | 3058 | 994.48  | 836.56  |
| 50000 | 1.19 | 0.75 | 0.25 | 33469 | 18750 | 3125 | 53.81 | 0.7473 | 0.7527 | 0.2473 | 0.2527 | 27924 | 18883 | 3192 | 28327 | 18615 | 3058 | 1103.33 | 935.87  |
| 50000 | 1.20 | 0.75 | 0.25 | 33750 | 18750 | 3125 | 59.15 | 0.7473 | 0.7527 | 0.2473 | 0.2527 | 27924 | 18883 | 3192 | 28327 | 18615 | 3058 | 1217.86 | 1040.78 |
| 50000 | 0.80 | 0.8  | 0.2  | 25600 | 16000 | 2000 | 63.27 | 0.7975 | 0.8025 | 0.1975 | 0.2025 | 31802 | 16148 | 2050 | 32199 | 15851 | 1951 | 1212.07 | 1354.95 |
| 50000 | 0.81 | 0.8  | 0.2  | 25920 | 16000 | 2000 | 56.44 | 0.7975 | 0.8025 | 0.1975 | 0.2025 | 31802 | 16148 | 2050 | 32199 | 15851 | 1951 | 1090.48 | 1226.97 |
| 50000 | 0.82 | 0.8  | 0.2  | 26240 | 16000 | 2000 | 50.08 | 0.7975 | 0.8025 | 0.1975 | 0.2025 | 31802 | 16148 | 2050 | 32199 | 15851 | 1951 | 975.33  | 1105.35 |
| 50000 | 0.83 | 0.8  | 0.2  | 26560 | 16000 | 2000 | 44.16 | 0.7975 | 0.8025 | 0.1975 | 0.2025 | 31802 | 16148 | 2050 | 32199 | 15851 | 1951 | 866.62  | 990.10  |
| 50000 | 0.84 | 0.8  | 0.2  | 26880 | 16000 | 2000 | 38.68 | 0.7975 | 0.8025 | 0.1975 | 0.2025 | 31802 | 16148 | 2050 | 32199 | 15851 | 1951 | 764.34  | 881.20  |
| 50000 | 0.85 | 0.8  | 0.2  | 27200 | 16000 | 2000 | 33.62 | 0.7975 | 0.8025 | 0.1975 | 0.2025 | 31802 | 16148 | 2050 | 32199 | 15851 | 1951 | 668.51  | 778.66  |
| 50000 | 0.86 | 0.8  | 0.2  | 27520 | 16000 | 2000 | 28.96 | 0.7975 | 0.8025 | 0.1975 | 0.2025 | 31802 | 16148 | 2050 | 32199 | 15851 | 1951 | 579.12  | 682.49  |
| 50000 | 0.87 | 0.8  | 0.2  | 27840 | 16000 | 2000 | 24.70 | 0.7975 | 0.8025 | 0.1975 | 0.2025 | 31802 | 16148 | 2050 | 32199 | 15851 | 1951 | 496.17  | 592.67  |
| 50000 | 0.88 | 0.8  | 0.2  | 28160 | 16000 | 2000 | 20.82 | 0.7975 | 0.8025 | 0.1975 | 0.2025 | 31802 | 16148 | 2050 | 32199 | 15851 | 1951 | 419.65  | 509.22  |
| 50000 | 0.89 | 0.8  | 0.2  | 28480 | 16000 | 2000 | 17.31 | 0.7975 | 0.8025 | 0.1975 | 0.2025 | 31802 | 16148 | 2050 | 32199 | 15851 | 1951 | 349.58  | 432.12  |
| 50000 | 0.90 | 0.8  | 0.2  | 28800 | 16000 | 2000 | 14.16 | 0.7975 | 0.8025 | 0.1975 | 0.2025 | 31802 | 16148 | 2050 | 32199 | 15851 | 1951 | 285.95  | 361.39  |
| 50000 | 0.91 | 0.8  | 0.2  | 29120 | 16000 | 2000 | 11.35 | 0.7975 | 0.8025 | 0.1975 | 0.2025 | 31802 | 16148 | 2050 | 32199 | 15851 | 1951 | 228.75  | 297.01  |
| 50000 | 0.92 | 0.8  | 0.2  | 29440 | 16000 | 2000 | 8.87  | 0.7975 | 0.8025 | 0.1975 | 0.2025 | 31802 | 16148 | 2050 | 32199 | 15851 | 1951 | 178.00  | 239.00  |
| 50000 | 0.93 | 0.8  | 0.2  | 29760 | 16000 | 2000 | 6.72  | 0.7975 | 0.8025 | 0.1975 | 0.2025 | 31802 | 16148 | 2050 | 32199 | 15851 | 1951 | 133.69  | 187.35  |
| 50000 | 0.94 | 0.8  | 0.2  | 30080 | 16000 | 2000 | 4.89  | 0.7975 | 0.8025 | 0.1975 | 0.2025 | 31802 | 16148 | 2050 | 32199 | 15851 | 1951 | 95.81   | 142.06  |
| 50000 | 0.95 | 0.8  | 0.2  | 30400 | 16000 | 2000 | 3.36  | 0.7975 | 0.8025 | 0.1975 | 0.2025 | 31802 | 16148 | 2050 | 32199 | 15851 | 1951 | 64.38   | 103.13  |
| 50000 | 0.96 | 0.8  | 0.2  | 30720 | 16000 | 2000 | 2.13  | 0.7975 | 0.8025 | 0.1975 | 0.2025 | 31802 | 16148 | 2050 | 32199 | 15851 | 1951 | 39.38   | 70.56   |
| 50000 | 0.97 | 0.8  | 0.2  | 31040 | 16000 | 2000 | 1.19  | 0.7975 | 0.8025 | 0.1975 | 0.2025 | 31802 | 16148 | 2050 | 32199 | 15851 | 1951 | 20.83   | 44.35   |
| 50000 | 0.98 | 0.8  | 0.2  | 31360 | 16000 | 2000 | 0.52  | 0.7975 | 0.8025 | 0.1975 | 0.2025 | 31802 | 16148 | 2050 | 32199 | 15851 | 1951 | 8.72    | 24.50   |
| 50000 | 0.99 | 0.8  | 0.2  | 31680 | 16000 | 2000 | 0.13  | 0.7975 | 0.8025 | 0.1975 | 0.2025 | 31802 | 16148 | 2050 | 32199 | 15851 | 1951 | 3.04    | 11.01   |
| 50000 | 1.00 | 0.8  | 0.2  | 32000 | 16000 | 2000 | 0.00  | 0.7975 | 0.8025 | 0.1975 | 0.2025 | 31802 | 16148 | 2050 | 32199 | 15851 | 1951 | 3.81    | 3.88    |
| 50000 | 1.01 | 0.8  | 0.2  | 32320 | 16000 | 2000 | 0.13  | 0.7975 | 0.8025 | 0.1975 | 0.2025 | 31802 | 16148 | 2050 | 32199 | 15851 | 1951 | 11.01   | 3.11    |
| 50000 | 1.02 | 0.8  | 0.2  | 32640 | 16000 | 2000 | 0.50  | 0.7975 | 0.8025 | 0.1975 | 0.2025 | 31802 | 16148 | 2050 | 32199 | 15851 | 1951 | 24.66   | 8.70    |
| 50000 | 1.03 | 0.8  | 0.2  | 32960 | 16000 | 2000 | 1.12  | 0.7975 | 0.8025 | 0.1975 | 0.2025 | 31802 | 16148 | 2050 | 32199 | 15851 | 1951 | 44.74   | 20.66   |
| 50000 | 1.04 | 0.8  | 0.2  | 33280 | 16000 | 2000 | 1.97  | 0.7975 | 0.8025 | 0.1975 | 0.2025 | 31802 | 16148 | 2050 | 32199 | 15851 | 1951 | 71.27   | 38.97   |
| 50000 | 1.05 | 0.8  | 0.2  | 33600 | 16000 | 2000 | 3.05  | 0.7975 | 0.8025 | 0.1975 | 0.2025 | 31802 | 16148 | 2050 | 32199 | 15851 | 1951 | 104.23  | 63.64   |
| 50000 | 1.06 | 0.8  | 0.2  | 33920 | 16000 | 2000 | 4.36  | 0.7975 | 0.8025 | 0.1975 | 0.2025 | 31802 | 16148 | 2050 | 32199 | 15851 | 1951 | 143.64  | 94.68   |
| 50000 | 1.07 | 0.8  | 0.2  | 34240 | 16000 | 2000 | 5.88  | 0.7975 | 0.8025 | 0.1975 | 0.2025 | 31802 | 16148 | 2050 | 32199 | 15851 | 1951 | 189.48  | 132.07  |
| 50000 | 1.08 | 0.8  | 0.2  | 34560 | 16000 | 2000 | 7.61  | 0.7975 | 0.8025 | 0.1975 | 0.2025 | 31802 | 16148 | 2050 | 32199 | 15851 | 1951 | 241.76  | 175.83  |
| 50000 | 1.09 | 0.8  | 0.2  | 34880 | 16000 | 2000 | 9.54  | 0.7975 | 0.8025 | 0.1975 | 0.2025 | 31802 | 16148 | 2050 | 32199 | 15851 | 1951 | 300.49  | 225.94  |
| 50000 | 1.10 | 0.8  | 0.2  | 35200 | 16000 | 2000 | 11.68 | 0.7975 | 0.8025 | 0.1975 | 0.2025 | 31802 | 16148 | 2050 | 32199 | 15851 | 1951 | 365.65  | 282.42  |
| 50000 | 1.11 | 0.8  | 0.2  | 35520 | 16000 | 2000 | 14.01 | 0.7975 | 0.8025 | 0.1975 | 0.2025 | 31802 | 16148 | 2050 | 32199 | 15851 | 1951 | 437.26  | 345.26  |

|       |      |      |      |       |       |      |       |        |        |        |        |       |       |      |       |       |      |         |         |
|-------|------|------|------|-------|-------|------|-------|--------|--------|--------|--------|-------|-------|------|-------|-------|------|---------|---------|
| 50000 | 1.12 | 0.8  | 0.2  | 35840 | 16000 | 2000 | 16.52 | 0.7975 | 0.8025 | 0.1975 | 0.2025 | 31802 | 16148 | 2050 | 32199 | 15851 | 1951 | 515.30  | 414.45  |
| 50000 | 1.13 | 0.8  | 0.2  | 36160 | 16000 | 2000 | 19.23 | 0.7975 | 0.8025 | 0.1975 | 0.2025 | 31802 | 16148 | 2050 | 32199 | 15851 | 1951 | 599.78  | 490.01  |
| 50000 | 1.14 | 0.8  | 0.2  | 36480 | 16000 | 2000 | 22.11 | 0.7975 | 0.8025 | 0.1975 | 0.2025 | 31802 | 16148 | 2050 | 32199 | 15851 | 1951 | 690.71  | 571.93  |
| 50000 | 1.15 | 0.8  | 0.2  | 36800 | 16000 | 2000 | 25.16 | 0.7975 | 0.8025 | 0.1975 | 0.2025 | 31802 | 16148 | 2050 | 32199 | 15851 | 1951 | 788.07  | 660.21  |
| 50000 | 1.16 | 0.8  | 0.2  | 37120 | 16000 | 2000 | 28.39 | 0.7975 | 0.8025 | 0.1975 | 0.2025 | 31802 | 16148 | 2050 | 32199 | 15851 | 1951 | 891.87  | 754.85  |
| 50000 | 1.17 | 0.8  | 0.2  | 37440 | 16000 | 2000 | 31.78 | 0.7975 | 0.8025 | 0.1975 | 0.2025 | 31802 | 16148 | 2050 | 32199 | 15851 | 1951 | 1002.11 | 855.85  |
| 50000 | 1.18 | 0.8  | 0.2  | 37760 | 16000 | 2000 | 35.34 | 0.7975 | 0.8025 | 0.1975 | 0.2025 | 31802 | 16148 | 2050 | 32199 | 15851 | 1951 | 1118.80 | 963.21  |
| 50000 | 1.19 | 0.8  | 0.2  | 38080 | 16000 | 2000 | 39.05 | 0.7975 | 0.8025 | 0.1975 | 0.2025 | 31802 | 16148 | 2050 | 32199 | 15851 | 1951 | 1241.92 | 1076.93 |
| 50000 | 1.20 | 0.8  | 0.2  | 38400 | 16000 | 2000 | 42.92 | 0.7975 | 0.8025 | 0.1975 | 0.2025 | 31802 | 16148 | 2050 | 32199 | 15851 | 1951 | 1371.48 | 1197.01 |
| 50000 | 0.80 | 0.85 | 0.15 | 28900 | 12750 | 1125 | 40.38 | 0.8478 | 0.8522 | 0.1478 | 0.1522 | 35937 | 12904 | 1158 | 36313 | 12595 | 1092 | 1380.81 | 1516.35 |
| 50000 | 0.81 | 0.85 | 0.15 | 29261 | 12750 | 1125 | 36.01 | 0.8478 | 0.8522 | 0.1478 | 0.1522 | 35937 | 12904 | 1158 | 36313 | 12595 | 1092 | 1242.96 | 1372.44 |
| 50000 | 0.82 | 0.85 | 0.15 | 29623 | 12750 | 1125 | 31.93 | 0.8478 | 0.8522 | 0.1478 | 0.1522 | 35937 | 12904 | 1158 | 36313 | 12595 | 1092 | 1112.38 | 1235.73 |
| 50000 | 0.83 | 0.85 | 0.15 | 29984 | 12750 | 1125 | 28.15 | 0.8478 | 0.8522 | 0.1478 | 0.1522 | 35937 | 12904 | 1158 | 36313 | 12595 | 1092 | 989.06  | 1106.20 |
| 50000 | 0.84 | 0.85 | 0.15 | 30345 | 12750 | 1125 | 24.65 | 0.8478 | 0.8522 | 0.1478 | 0.1522 | 35937 | 12904 | 1158 | 36313 | 12595 | 1092 | 873.00  | 983.86  |
| 50000 | 0.85 | 0.85 | 0.15 | 30706 | 12750 | 1125 | 21.42 | 0.8478 | 0.8522 | 0.1478 | 0.1522 | 35937 | 12904 | 1158 | 36313 | 12595 | 1092 | 764.20  | 868.70  |
| 50000 | 0.86 | 0.85 | 0.15 | 31068 | 12750 | 1125 | 18.45 | 0.8478 | 0.8522 | 0.1478 | 0.1522 | 35937 | 12904 | 1158 | 36313 | 12595 | 1092 | 662.67  | 760.73  |
| 50000 | 0.87 | 0.85 | 0.15 | 31429 | 12750 | 1125 | 15.73 | 0.8478 | 0.8522 | 0.1478 | 0.1522 | 35937 | 12904 | 1158 | 36313 | 12595 | 1092 | 568.40  | 659.96  |
| 50000 | 0.88 | 0.85 | 0.15 | 31790 | 12750 | 1125 | 13.26 | 0.8478 | 0.8522 | 0.1478 | 0.1522 | 35937 | 12904 | 1158 | 36313 | 12595 | 1092 | 481.39  | 566.36  |
| 50000 | 0.89 | 0.85 | 0.15 | 32151 | 12750 | 1125 | 11.02 | 0.8478 | 0.8522 | 0.1478 | 0.1522 | 35937 | 12904 | 1158 | 36313 | 12595 | 1092 | 401.65  | 479.96  |
| 50000 | 0.90 | 0.85 | 0.15 | 32513 | 12750 | 1125 | 9.01  | 0.8478 | 0.8522 | 0.1478 | 0.1522 | 35937 | 12904 | 1158 | 36313 | 12595 | 1092 | 329.16  | 400.74  |
| 50000 | 0.91 | 0.85 | 0.15 | 32874 | 12750 | 1125 | 7.22  | 0.8478 | 0.8522 | 0.1478 | 0.1522 | 35937 | 12904 | 1158 | 36313 | 12595 | 1092 | 263.94  | 328.71  |
| 50000 | 0.92 | 0.85 | 0.15 | 33235 | 12750 | 1125 | 5.64  | 0.8478 | 0.8522 | 0.1478 | 0.1522 | 35937 | 12904 | 1158 | 36313 | 12595 | 1092 | 205.99  | 263.87  |
| 50000 | 0.93 | 0.85 | 0.15 | 33596 | 12750 | 1125 | 4.27  | 0.8478 | 0.8522 | 0.1478 | 0.1522 | 35937 | 12904 | 1158 | 36313 | 12595 | 1092 | 155.29  | 206.22  |
| 50000 | 0.94 | 0.85 | 0.15 | 33958 | 12750 | 1125 | 3.11  | 0.8478 | 0.8522 | 0.1478 | 0.1522 | 35937 | 12904 | 1158 | 36313 | 12595 | 1092 | 111.86  | 155.75  |
| 50000 | 0.95 | 0.85 | 0.15 | 34319 | 12750 | 1125 | 2.14  | 0.8478 | 0.8522 | 0.1478 | 0.1522 | 35937 | 12904 | 1158 | 36313 | 12595 | 1092 | 75.69   | 112.47  |
| 50000 | 0.96 | 0.85 | 0.15 | 34680 | 12750 | 1125 | 1.35  | 0.8478 | 0.8522 | 0.1478 | 0.1522 | 35937 | 12904 | 1158 | 36313 | 12595 | 1092 | 46.79   | 76.38   |
| 50000 | 0.97 | 0.85 | 0.15 | 35041 | 12750 | 1125 | 0.75  | 0.8478 | 0.8522 | 0.1478 | 0.1522 | 35937 | 12904 | 1158 | 36313 | 12595 | 1092 | 25.15   | 47.48   |
| 50000 | 0.98 | 0.85 | 0.15 | 35403 | 12750 | 1125 | 0.33  | 0.8478 | 0.8522 | 0.1478 | 0.1522 | 35937 | 12904 | 1158 | 36313 | 12595 | 1092 | 10.77   | 25.76   |
| 50000 | 0.99 | 0.85 | 0.15 | 35764 | 12750 | 1125 | 0.08  | 0.8478 | 0.8522 | 0.1478 | 0.1522 | 35937 | 12904 | 1158 | 36313 | 12595 | 1092 | 3.65    | 11.23   |
| 50000 | 1.00 | 0.85 | 0.15 | 36125 | 12750 | 1125 | 0.00  | 0.8478 | 0.8522 | 0.1478 | 0.1522 | 35937 | 12904 | 1158 | 36313 | 12595 | 1092 | 3.80    | 3.89    |
| 50000 | 1.01 | 0.85 | 0.15 | 36486 | 12750 | 1125 | 0.08  | 0.8478 | 0.8522 | 0.1478 | 0.1522 | 35937 | 12904 | 1158 | 36313 | 12595 | 1092 | 11.20   | 3.74    |
| 50000 | 1.02 | 0.85 | 0.15 | 36848 | 12750 | 1125 | 0.32  | 0.8478 | 0.8522 | 0.1478 | 0.1522 | 35937 | 12904 | 1158 | 36313 | 12595 | 1092 | 25.88   | 10.77   |
| 50000 | 1.03 | 0.85 | 0.15 | 37209 | 12750 | 1125 | 0.71  | 0.8478 | 0.8522 | 0.1478 | 0.1522 | 35937 | 12904 | 1158 | 36313 | 12595 | 1092 | 47.81   | 24.99   |
| 50000 | 1.04 | 0.85 | 0.15 | 37570 | 12750 | 1125 | 1.25  | 0.8478 | 0.8522 | 0.1478 | 0.1522 | 35937 | 12904 | 1158 | 36313 | 12595 | 1092 | 77.01   | 46.40   |
| 50000 | 1.05 | 0.85 | 0.15 | 37931 | 12750 | 1125 | 1.94  | 0.8478 | 0.8522 | 0.1478 | 0.1522 | 35937 | 12904 | 1158 | 36313 | 12595 | 1092 | 113.47  | 74.99   |

|       |      |      |      |       |       |      |       |        |        |        |        |       |       |      |       |       |      |         |         |
|-------|------|------|------|-------|-------|------|-------|--------|--------|--------|--------|-------|-------|------|-------|-------|------|---------|---------|
| 50000 | 1.06 | 0.85 | 0.15 | 38293 | 12750 | 1125 | 2.76  | 0.8478 | 0.8522 | 0.1478 | 0.1522 | 35937 | 12904 | 1158 | 36313 | 12595 | 1092 | 157.19  | 110.78  |
| 50000 | 1.07 | 0.85 | 0.15 | 38654 | 12750 | 1125 | 3.73  | 0.8478 | 0.8522 | 0.1478 | 0.1522 | 35937 | 12904 | 1158 | 36313 | 12595 | 1092 | 208.17  | 153.75  |
| 50000 | 1.08 | 0.85 | 0.15 | 39015 | 12750 | 1125 | 4.82  | 0.8478 | 0.8522 | 0.1478 | 0.1522 | 35937 | 12904 | 1158 | 36313 | 12595 | 1092 | 266.42  | 203.91  |
| 50000 | 1.09 | 0.85 | 0.15 | 39376 | 12750 | 1125 | 6.05  | 0.8478 | 0.8522 | 0.1478 | 0.1522 | 35937 | 12904 | 1158 | 36313 | 12595 | 1092 | 331.93  | 261.25  |
| 50000 | 1.10 | 0.85 | 0.15 | 39738 | 12750 | 1125 | 7.40  | 0.8478 | 0.8522 | 0.1478 | 0.1522 | 35937 | 12904 | 1158 | 36313 | 12595 | 1092 | 404.71  | 325.79  |
| 50000 | 1.11 | 0.85 | 0.15 | 40099 | 12750 | 1125 | 8.88  | 0.8478 | 0.8522 | 0.1478 | 0.1522 | 35937 | 12904 | 1158 | 36313 | 12595 | 1092 | 484.74  | 397.51  |
| 50000 | 1.12 | 0.85 | 0.15 | 40460 | 12750 | 1125 | 10.47 | 0.8478 | 0.8522 | 0.1478 | 0.1522 | 35937 | 12904 | 1158 | 36313 | 12595 | 1092 | 572.04  | 476.42  |
| 50000 | 1.13 | 0.85 | 0.15 | 40821 | 12750 | 1125 | 12.19 | 0.8478 | 0.8522 | 0.1478 | 0.1522 | 35937 | 12904 | 1158 | 36313 | 12595 | 1092 | 666.60  | 562.51  |
| 50000 | 1.14 | 0.85 | 0.15 | 41183 | 12750 | 1125 | 14.01 | 0.8478 | 0.8522 | 0.1478 | 0.1522 | 35937 | 12904 | 1158 | 36313 | 12595 | 1092 | 768.43  | 655.80  |
| 50000 | 1.15 | 0.85 | 0.15 | 41544 | 12750 | 1125 | 15.95 | 0.8478 | 0.8522 | 0.1478 | 0.1522 | 35937 | 12904 | 1158 | 36313 | 12595 | 1092 | 877.51  | 756.27  |
| 50000 | 1.16 | 0.85 | 0.15 | 41905 | 12750 | 1125 | 17.99 | 0.8478 | 0.8522 | 0.1478 | 0.1522 | 35937 | 12904 | 1158 | 36313 | 12595 | 1092 | 993.86  | 863.93  |
| 50000 | 1.17 | 0.85 | 0.15 | 42266 | 12750 | 1125 | 20.14 | 0.8478 | 0.8522 | 0.1478 | 0.1522 | 35937 | 12904 | 1158 | 36313 | 12595 | 1092 | 1117.48 | 978.77  |
| 50000 | 1.18 | 0.85 | 0.15 | 42628 | 12750 | 1125 | 22.39 | 0.8478 | 0.8522 | 0.1478 | 0.1522 | 35937 | 12904 | 1158 | 36313 | 12595 | 1092 | 1248.35 | 1100.81 |
| 50000 | 1.19 | 0.85 | 0.15 | 42989 | 12750 | 1125 | 24.74 | 0.8478 | 0.8522 | 0.1478 | 0.1522 | 35937 | 12904 | 1158 | 36313 | 12595 | 1092 | 1386.49 | 1230.03 |
| 50000 | 1.20 | 0.85 | 0.15 | 43350 | 12750 | 1125 | 27.18 | 0.8478 | 0.8522 | 0.1478 | 0.1522 | 35937 | 12904 | 1158 | 36313 | 12595 | 1092 | 1531.89 | 1366.44 |
| 50000 | 0.80 | 0.9  | 0.1  | 32400 | 9000  | 500  | 20.19 | 0.8981 | 0.9019 | 0.0981 | 0.1019 | 40333 | 9148  | 519  | 40668 | 8851  | 482  | 1563.35 | 1683.97 |
| 50000 | 0.81 | 0.9  | 0.1  | 32805 | 9000  | 500  | 18.00 | 0.8981 | 0.9019 | 0.0981 | 0.1019 | 40333 | 9148  | 519  | 40668 | 8851  | 482  | 1408.10 | 1523.33 |
| 50000 | 0.82 | 0.9  | 0.1  | 33210 | 9000  | 500  | 15.96 | 0.8981 | 0.9019 | 0.0981 | 0.1019 | 40333 | 9148  | 519  | 40668 | 8851  | 482  | 1260.99 | 1370.76 |
| 50000 | 0.83 | 0.9  | 0.1  | 33615 | 9000  | 500  | 14.07 | 0.8981 | 0.9019 | 0.0981 | 0.1019 | 40333 | 9148  | 519  | 40668 | 8851  | 482  | 1122.01 | 1226.26 |
| 50000 | 0.84 | 0.9  | 0.1  | 34020 | 9000  | 500  | 12.32 | 0.8981 | 0.9019 | 0.0981 | 0.1019 | 40333 | 9148  | 519  | 40668 | 8851  | 482  | 991.16  | 1089.82 |
| 50000 | 0.85 | 0.9  | 0.1  | 34425 | 9000  | 500  | 10.70 | 0.8981 | 0.9019 | 0.0981 | 0.1019 | 40333 | 9148  | 519  | 40668 | 8851  | 482  | 868.45  | 961.45  |
| 50000 | 0.86 | 0.9  | 0.1  | 34830 | 9000  | 500  | 9.21  | 0.8981 | 0.9019 | 0.0981 | 0.1019 | 40333 | 9148  | 519  | 40668 | 8851  | 482  | 753.87  | 841.15  |
| 50000 | 0.87 | 0.9  | 0.1  | 35235 | 9000  | 500  | 7.85  | 0.8981 | 0.9019 | 0.0981 | 0.1019 | 40333 | 9148  | 519  | 40668 | 8851  | 482  | 647.42  | 728.91  |
| 50000 | 0.88 | 0.9  | 0.1  | 35640 | 9000  | 500  | 6.62  | 0.8981 | 0.9019 | 0.0981 | 0.1019 | 40333 | 9148  | 519  | 40668 | 8851  | 482  | 549.11  | 624.74  |
| 50000 | 0.89 | 0.9  | 0.1  | 36045 | 9000  | 500  | 5.50  | 0.8981 | 0.9019 | 0.0981 | 0.1019 | 40333 | 9148  | 519  | 40668 | 8851  | 482  | 458.93  | 528.64  |
| 50000 | 0.90 | 0.9  | 0.1  | 36450 | 9000  | 500  | 4.49  | 0.8981 | 0.9019 | 0.0981 | 0.1019 | 40333 | 9148  | 519  | 40668 | 8851  | 482  | 376.88  | 440.60  |
| 50000 | 0.91 | 0.9  | 0.1  | 36855 | 9000  | 500  | 3.60  | 0.8981 | 0.9019 | 0.0981 | 0.1019 | 40333 | 9148  | 519  | 40668 | 8851  | 482  | 302.97  | 360.63  |
| 50000 | 0.92 | 0.9  | 0.1  | 37260 | 9000  | 500  | 2.81  | 0.8981 | 0.9019 | 0.0981 | 0.1019 | 40333 | 9148  | 519  | 40668 | 8851  | 482  | 237.19  | 288.73  |
| 50000 | 0.93 | 0.9  | 0.1  | 37665 | 9000  | 500  | 2.13  | 0.8981 | 0.9019 | 0.0981 | 0.1019 | 40333 | 9148  | 519  | 40668 | 8851  | 482  | 179.55  | 224.90  |
| 50000 | 0.94 | 0.9  | 0.1  | 38070 | 9000  | 500  | 1.55  | 0.8981 | 0.9019 | 0.0981 | 0.1019 | 40333 | 9148  | 519  | 40668 | 8851  | 482  | 130.04  | 169.13  |
| 50000 | 0.95 | 0.9  | 0.1  | 38475 | 9000  | 500  | 1.07  | 0.8981 | 0.9019 | 0.0981 | 0.1019 | 40333 | 9148  | 519  | 40668 | 8851  | 482  | 88.66   | 121.42  |
| 50000 | 0.96 | 0.9  | 0.1  | 38880 | 9000  | 500  | 0.67  | 0.8981 | 0.9019 | 0.0981 | 0.1019 | 40333 | 9148  | 519  | 40668 | 8851  | 482  | 55.42   | 81.79   |
| 50000 | 0.97 | 0.9  | 0.1  | 39285 | 9000  | 500  | 0.38  | 0.8981 | 0.9019 | 0.0981 | 0.1019 | 40333 | 9148  | 519  | 40668 | 8851  | 482  | 30.31   | 50.22   |
| 50000 | 0.98 | 0.9  | 0.1  | 39690 | 9000  | 500  | 0.17  | 0.8981 | 0.9019 | 0.0981 | 0.1019 | 40333 | 9148  | 519  | 40668 | 8851  | 482  | 13.33   | 26.71   |
| 50000 | 0.99 | 0.9  | 0.1  | 40095 | 9000  | 500  | 0.04  | 0.8981 | 0.9019 | 0.0981 | 0.1019 | 40333 | 9148  | 519  | 40668 | 8851  | 482  | 4.49    | 11.28   |

|       |      |      |      |       |      |     |       |        |        |        |        |       |      |     |       |      |     |         |         |
|-------|------|------|------|-------|------|-----|-------|--------|--------|--------|--------|-------|------|-----|-------|------|-----|---------|---------|
| 50000 | 1.00 | 0.9  | 0.1  | 40500 | 9000 | 500 | 0.00  | 0.8981 | 0.9019 | 0.0981 | 0.1019 | 40333 | 9148 | 519 | 40668 | 8851 | 482 | 3.78    | 3.91    |
| 50000 | 1.01 | 0.9  | 0.1  | 40905 | 9000 | 500 | 0.04  | 0.8981 | 0.9019 | 0.0981 | 0.1019 | 40333 | 9148 | 519 | 40668 | 8851 | 482 | 11.20   | 4.60    |
| 50000 | 1.02 | 0.9  | 0.1  | 41310 | 9000 | 500 | 0.16  | 0.8981 | 0.9019 | 0.0981 | 0.1019 | 40333 | 9148 | 519 | 40668 | 8851 | 482 | 26.76   | 13.37   |
| 50000 | 1.03 | 0.9  | 0.1  | 41715 | 9000 | 500 | 0.35  | 0.8981 | 0.9019 | 0.0981 | 0.1019 | 40333 | 9148 | 519 | 40668 | 8851 | 482 | 50.45   | 30.20   |
| 50000 | 1.04 | 0.9  | 0.1  | 42120 | 9000 | 500 | 0.62  | 0.8981 | 0.9019 | 0.0981 | 0.1019 | 40333 | 9148 | 519 | 40668 | 8851 | 482 | 82.28   | 55.09   |
| 50000 | 1.05 | 0.9  | 0.1  | 42525 | 9000 | 500 | 0.96  | 0.8981 | 0.9019 | 0.0981 | 0.1019 | 40333 | 9148 | 519 | 40668 | 8851 | 482 | 122.24  | 88.06   |
| 50000 | 1.06 | 0.9  | 0.1  | 42930 | 9000 | 500 | 1.38  | 0.8981 | 0.9019 | 0.0981 | 0.1019 | 40333 | 9148 | 519 | 40668 | 8851 | 482 | 170.33  | 129.09  |
| 50000 | 1.07 | 0.9  | 0.1  | 43335 | 9000 | 500 | 1.86  | 0.8981 | 0.9019 | 0.0981 | 0.1019 | 40333 | 9148 | 519 | 40668 | 8851 | 482 | 226.55  | 178.18  |
| 50000 | 1.08 | 0.9  | 0.1  | 43740 | 9000 | 500 | 2.40  | 0.8981 | 0.9019 | 0.0981 | 0.1019 | 40333 | 9148 | 519 | 40668 | 8851 | 482 | 290.91  | 235.35  |
| 50000 | 1.09 | 0.9  | 0.1  | 44145 | 9000 | 500 | 3.01  | 0.8981 | 0.9019 | 0.0981 | 0.1019 | 40333 | 9148 | 519 | 40668 | 8851 | 482 | 363.41  | 300.58  |
| 50000 | 1.10 | 0.9  | 0.1  | 44550 | 9000 | 500 | 3.68  | 0.8981 | 0.9019 | 0.0981 | 0.1019 | 40333 | 9148 | 519 | 40668 | 8851 | 482 | 444.03  | 373.87  |
| 50000 | 1.11 | 0.9  | 0.1  | 44955 | 9000 | 500 | 4.42  | 0.8981 | 0.9019 | 0.0981 | 0.1019 | 40333 | 9148 | 519 | 40668 | 8851 | 482 | 532.79  | 455.24  |
| 50000 | 1.12 | 0.9  | 0.1  | 45360 | 9000 | 500 | 5.21  | 0.8981 | 0.9019 | 0.0981 | 0.1019 | 40333 | 9148 | 519 | 40668 | 8851 | 482 | 629.68  | 544.66  |
| 50000 | 1.13 | 0.9  | 0.1  | 45765 | 9000 | 500 | 6.06  | 0.8981 | 0.9019 | 0.0981 | 0.1019 | 40333 | 9148 | 519 | 40668 | 8851 | 482 | 734.71  | 642.16  |
| 50000 | 1.14 | 0.9  | 0.1  | 46170 | 9000 | 500 | 6.97  | 0.8981 | 0.9019 | 0.0981 | 0.1019 | 40333 | 9148 | 519 | 40668 | 8851 | 482 | 847.87  | 747.72  |
| 50000 | 1.15 | 0.9  | 0.1  | 46575 | 9000 | 500 | 7.93  | 0.8981 | 0.9019 | 0.0981 | 0.1019 | 40333 | 9148 | 519 | 40668 | 8851 | 482 | 969.17  | 861.35  |
| 50000 | 1.16 | 0.9  | 0.1  | 46980 | 9000 | 500 | 8.95  | 0.8981 | 0.9019 | 0.0981 | 0.1019 | 40333 | 9148 | 519 | 40668 | 8851 | 482 | 1098.59 | 983.05  |
| 50000 | 1.17 | 0.9  | 0.1  | 47385 | 9000 | 500 | 10.02 | 0.8981 | 0.9019 | 0.0981 | 0.1019 | 40333 | 9148 | 519 | 40668 | 8851 | 482 | 1236.16 | 1112.81 |
| 50000 | 1.18 | 0.9  | 0.1  | 47790 | 9000 | 500 | 11.14 | 0.8981 | 0.9019 | 0.0981 | 0.1019 | 40333 | 9148 | 519 | 40668 | 8851 | 482 | 1381.85 | 1250.64 |
| 50000 | 1.19 | 0.9  | 0.1  | 48195 | 9000 | 500 | 12.30 | 0.8981 | 0.9019 | 0.0981 | 0.1019 | 40333 | 9148 | 519 | 40668 | 8851 | 482 | 1535.68 | 1396.54 |
| 50000 | 1.20 | 0.9  | 0.1  | 48600 | 9000 | 500 | 13.52 | 0.8981 | 0.9019 | 0.0981 | 0.1019 | 40333 | 9148 | 519 | 40668 | 8851 | 482 | 1697.64 | 1550.50 |
| 50000 | 0.80 | 0.95 | 0.05 | 36100 | 4750 | 125 | 5.64  | 0.9486 | 0.9514 | 0.0486 | 0.0514 | 44997 | 4871 | 132 | 45253 | 4628 | 118 | 1762.45 | 1855.04 |
| 50000 | 0.81 | 0.95 | 0.05 | 36551 | 4750 | 125 | 5.02  | 0.9486 | 0.9514 | 0.0486 | 0.0514 | 44997 | 4871 | 132 | 45253 | 4628 | 118 | 1588.53 | 1676.99 |
| 50000 | 0.82 | 0.95 | 0.05 | 37003 | 4750 | 125 | 4.45  | 0.9486 | 0.9514 | 0.0486 | 0.0514 | 44997 | 4871 | 132 | 45253 | 4628 | 118 | 1423.67 | 1507.94 |
| 50000 | 0.83 | 0.95 | 0.05 | 37454 | 4750 | 125 | 3.93  | 0.9486 | 0.9514 | 0.0486 | 0.0514 | 44997 | 4871 | 132 | 45253 | 4628 | 118 | 1267.85 | 1347.89 |
| 50000 | 0.84 | 0.95 | 0.05 | 37905 | 4750 | 125 | 3.44  | 0.9486 | 0.9514 | 0.0486 | 0.0514 | 44997 | 4871 | 132 | 45253 | 4628 | 118 | 1121.09 | 1196.84 |
| 50000 | 0.85 | 0.95 | 0.05 | 38356 | 4750 | 125 | 2.98  | 0.9486 | 0.9514 | 0.0486 | 0.0514 | 44997 | 4871 | 132 | 45253 | 4628 | 118 | 983.37  | 1054.79 |
| 50000 | 0.86 | 0.95 | 0.05 | 38808 | 4750 | 125 | 2.57  | 0.9486 | 0.9514 | 0.0486 | 0.0514 | 44997 | 4871 | 132 | 45253 | 4628 | 118 | 854.71  | 921.74  |
| 50000 | 0.87 | 0.95 | 0.05 | 39259 | 4750 | 125 | 2.19  | 0.9486 | 0.9514 | 0.0486 | 0.0514 | 44997 | 4871 | 132 | 45253 | 4628 | 118 | 735.09  | 797.69  |
| 50000 | 0.88 | 0.95 | 0.05 | 39710 | 4750 | 125 | 1.85  | 0.9486 | 0.9514 | 0.0486 | 0.0514 | 44997 | 4871 | 132 | 45253 | 4628 | 118 | 624.53  | 682.63  |
| 50000 | 0.89 | 0.95 | 0.05 | 40161 | 4750 | 125 | 1.53  | 0.9486 | 0.9514 | 0.0486 | 0.0514 | 44997 | 4871 | 132 | 45253 | 4628 | 118 | 523.02  | 576.58  |
| 50000 | 0.90 | 0.95 | 0.05 | 40613 | 4750 | 125 | 1.25  | 0.9486 | 0.9514 | 0.0486 | 0.0514 | 44997 | 4871 | 132 | 45253 | 4628 | 118 | 430.56  | 479.52  |
| 50000 | 0.91 | 0.95 | 0.05 | 41064 | 4750 | 125 | 1.00  | 0.9486 | 0.9514 | 0.0486 | 0.0514 | 44997 | 4871 | 132 | 45253 | 4628 | 118 | 347.15  | 391.47  |
| 50000 | 0.92 | 0.95 | 0.05 | 41515 | 4750 | 125 | 0.78  | 0.9486 | 0.9514 | 0.0486 | 0.0514 | 44997 | 4871 | 132 | 45253 | 4628 | 118 | 272.79  | 312.41  |
| 50000 | 0.93 | 0.95 | 0.05 | 41966 | 4750 | 125 | 0.59  | 0.9486 | 0.9514 | 0.0486 | 0.0514 | 44997 | 4871 | 132 | 45253 | 4628 | 118 | 207.48  | 242.36  |

|       |      |      |      |       |      |     |      |        |        |        |        |       |      |     |       |      |     |         |         |
|-------|------|------|------|-------|------|-----|------|--------|--------|--------|--------|-------|------|-----|-------|------|-----|---------|---------|
| 50000 | 0.94 | 0.95 | 0.05 | 42418 | 4750 | 125 | 0.43 | 0.9486 | 0.9514 | 0.0486 | 0.0514 | 44997 | 4871 | 132 | 45253 | 4628 | 118 | 151.23  | 181.30  |
| 50000 | 0.95 | 0.95 | 0.05 | 42869 | 4750 | 125 | 0.30 | 0.9486 | 0.9514 | 0.0486 | 0.0514 | 44997 | 4871 | 132 | 45253 | 4628 | 118 | 104.02  | 129.24  |
| 50000 | 0.96 | 0.95 | 0.05 | 43320 | 4750 | 125 | 0.19 | 0.9486 | 0.9514 | 0.0486 | 0.0514 | 44997 | 4871 | 132 | 45253 | 4628 | 118 | 65.86   | 86.18   |
| 50000 | 0.97 | 0.95 | 0.05 | 43771 | 4750 | 125 | 0.10 | 0.9486 | 0.9514 | 0.0486 | 0.0514 | 44997 | 4871 | 132 | 45253 | 4628 | 118 | 36.76   | 52.12   |
| 50000 | 0.98 | 0.95 | 0.05 | 44223 | 4750 | 125 | 0.05 | 0.9486 | 0.9514 | 0.0486 | 0.0514 | 44997 | 4871 | 132 | 45253 | 4628 | 118 | 16.70   | 27.06   |
| 50000 | 0.99 | 0.95 | 0.05 | 44674 | 4750 | 125 | 0.01 | 0.9486 | 0.9514 | 0.0486 | 0.0514 | 44997 | 4871 | 132 | 45253 | 4628 | 118 | 5.70    | 11.00   |
| 50000 | 1.00 | 0.95 | 0.05 | 45125 | 4750 | 125 | 0.00 | 0.9486 | 0.9514 | 0.0486 | 0.0514 | 44997 | 4871 | 132 | 45253 | 4628 | 118 | 3.75    | 3.94    |
| 50000 | 1.01 | 0.95 | 0.05 | 45576 | 4750 | 125 | 0.01 | 0.9486 | 0.9514 | 0.0486 | 0.0514 | 44997 | 4871 | 132 | 45253 | 4628 | 118 | 10.84   | 5.88    |
| 50000 | 1.02 | 0.95 | 0.05 | 46028 | 4750 | 125 | 0.04 | 0.9486 | 0.9514 | 0.0486 | 0.0514 | 44997 | 4871 | 132 | 45253 | 4628 | 118 | 26.99   | 16.82   |
| 50000 | 1.03 | 0.95 | 0.05 | 46479 | 4750 | 125 | 0.10 | 0.9486 | 0.9514 | 0.0486 | 0.0514 | 44997 | 4871 | 132 | 45253 | 4628 | 118 | 52.19   | 36.76   |
| 50000 | 1.04 | 0.95 | 0.05 | 46930 | 4750 | 125 | 0.17 | 0.9486 | 0.9514 | 0.0486 | 0.0514 | 44997 | 4871 | 132 | 45253 | 4628 | 118 | 86.44   | 65.69   |
| 50000 | 1.05 | 0.95 | 0.05 | 47381 | 4750 | 125 | 0.27 | 0.9486 | 0.9514 | 0.0486 | 0.0514 | 44997 | 4871 | 132 | 45253 | 4628 | 118 | 129.74  | 103.63  |
| 50000 | 1.06 | 0.95 | 0.05 | 47833 | 4750 | 125 | 0.38 | 0.9486 | 0.9514 | 0.0486 | 0.0514 | 44997 | 4871 | 132 | 45253 | 4628 | 118 | 182.09  | 150.56  |
| 50000 | 1.07 | 0.95 | 0.05 | 48284 | 4750 | 125 | 0.52 | 0.9486 | 0.9514 | 0.0486 | 0.0514 | 44997 | 4871 | 132 | 45253 | 4628 | 118 | 243.49  | 206.50  |
| 50000 | 1.08 | 0.95 | 0.05 | 48735 | 4750 | 125 | 0.67 | 0.9486 | 0.9514 | 0.0486 | 0.0514 | 44997 | 4871 | 132 | 45253 | 4628 | 118 | 313.95  | 271.43  |
| 50000 | 1.09 | 0.95 | 0.05 | 49186 | 4750 | 125 | 0.84 | 0.9486 | 0.9514 | 0.0486 | 0.0514 | 44997 | 4871 | 132 | 45253 | 4628 | 118 | 393.45  | 345.37  |
| 50000 | 1.10 | 0.95 | 0.05 | 49638 | 4750 | 125 | 1.03 | 0.9486 | 0.9514 | 0.0486 | 0.0514 | 44997 | 4871 | 132 | 45253 | 4628 | 118 | 482.00  | 428.30  |
| 50000 | 1.11 | 0.95 | 0.05 | 50089 | 4750 | 125 | 1.23 | 0.9486 | 0.9514 | 0.0486 | 0.0514 | 44997 | 4871 | 132 | 45253 | 4628 | 118 | 579.61  | 520.23  |
| 50000 | 1.12 | 0.95 | 0.05 | 50540 | 4750 | 125 | 1.45 | 0.9486 | 0.9514 | 0.0486 | 0.0514 | 44997 | 4871 | 132 | 45253 | 4628 | 118 | 686.26  | 621.17  |
| 50000 | 1.13 | 0.95 | 0.05 | 50991 | 4750 | 125 | 1.69 | 0.9486 | 0.9514 | 0.0486 | 0.0514 | 44997 | 4871 | 132 | 45253 | 4628 | 118 | 801.97  | 731.10  |
| 50000 | 1.14 | 0.95 | 0.05 | 51443 | 4750 | 125 | 1.94 | 0.9486 | 0.9514 | 0.0486 | 0.0514 | 44997 | 4871 | 132 | 45253 | 4628 | 118 | 926.73  | 850.03  |
| 50000 | 1.15 | 0.95 | 0.05 | 51894 | 4750 | 125 | 2.21 | 0.9486 | 0.9514 | 0.0486 | 0.0514 | 44997 | 4871 | 132 | 45253 | 4628 | 118 | 1060.53 | 977.96  |
| 50000 | 1.16 | 0.95 | 0.05 | 52345 | 4750 | 125 | 2.49 | 0.9486 | 0.9514 | 0.0486 | 0.0514 | 44997 | 4871 | 132 | 45253 | 4628 | 118 | 1203.39 | 1114.89 |
| 50000 | 1.17 | 0.95 | 0.05 | 52796 | 4750 | 125 | 2.79 | 0.9486 | 0.9514 | 0.0486 | 0.0514 | 44997 | 4871 | 132 | 45253 | 4628 | 118 | 1355.30 | 1260.82 |
| 50000 | 1.18 | 0.95 | 0.05 | 53248 | 4750 | 125 | 3.10 | 0.9486 | 0.9514 | 0.0486 | 0.0514 | 44997 | 4871 | 132 | 45253 | 4628 | 118 | 1516.26 | 1415.74 |
| 50000 | 1.19 | 0.95 | 0.05 | 53699 | 4750 | 125 | 3.42 | 0.9486 | 0.9514 | 0.0486 | 0.0514 | 44997 | 4871 | 132 | 45253 | 4628 | 118 | 1686.27 | 1579.67 |
| 50000 | 1.20 | 0.95 | 0.05 | 54150 | 4750 | 125 | 3.76 | 0.9486 | 0.9514 | 0.0486 | 0.0514 | 44997 | 4871 | 132 | 45253 | 4628 | 118 | 1865.33 | 1752.60 |
| 50000 | 0.80 | 1    | 0    | 40000 | 0    | 0   | 3.76 | 1.0000 | 1.0000 | 0.0000 | 0.0000 | 50000 | 0    | 0   | 50000 | 0    | 0   | .       | .       |
| 50000 | 0.81 | 1    | 0    | 40500 | 0    | 0   | 3.76 | 1.0000 | 1.0000 | 0.0000 | 0.0000 | 50000 | 0    | 0   | 50000 | 0    | 0   | .       | .       |
| 50000 | 0.82 | 1    | 0    | 41000 | 0    | 0   | 3.76 | 1.0000 | 1.0000 | 0.0000 | 0.0000 | 50000 | 0    | 0   | 50000 | 0    | 0   | .       | .       |
| 50000 | 0.83 | 1    | 0    | 41500 | 0    | 0   | 3.76 | 1.0000 | 1.0000 | 0.0000 | 0.0000 | 50000 | 0    | 0   | 50000 | 0    | 0   | .       | .       |
| 50000 | 0.84 | 1    | 0    | 42000 | 0    | 0   | 3.76 | 1.0000 | 1.0000 | 0.0000 | 0.0000 | 50000 | 0    | 0   | 50000 | 0    | 0   | .       | .       |
| 50000 | 0.85 | 1    | 0    | 42500 | 0    | 0   | 3.76 | 1.0000 | 1.0000 | 0.0000 | 0.0000 | 50000 | 0    | 0   | 50000 | 0    | 0   | .       | .       |
| 50000 | 0.86 | 1    | 0    | 43000 | 0    | 0   | 3.76 | 1.0000 | 1.0000 | 0.0000 | 0.0000 | 50000 | 0    | 0   | 50000 | 0    | 0   | .       | .       |
| 50000 | 0.87 | 1    | 0    | 43500 | 0    | 0   | 3.76 | 1.0000 | 1.0000 | 0.0000 | 0.0000 | 50000 | 0    | 0   | 50000 | 0    | 0   | .       | .       |

|        |      |      |      |       |      |       |      |        |        |        |        |       |      |       |       |      |       |       |       |
|--------|------|------|------|-------|------|-------|------|--------|--------|--------|--------|-------|------|-------|-------|------|-------|-------|-------|
| 50000  | 0.88 | 1    | 0    | 44000 | 0    | 0     | 3.76 | 1.0000 | 1.0000 | 0.0000 | 0.0000 | 50000 | 0    | 0     | 50000 | 0    | 0     | .     | .     |
| 50000  | 0.89 | 1    | 0    | 44500 | 0    | 0     | 3.76 | 1.0000 | 1.0000 | 0.0000 | 0.0000 | 50000 | 0    | 0     | 50000 | 0    | 0     | .     | .     |
| 50000  | 0.90 | 1    | 0    | 45000 | 0    | 0     | 3.76 | 1.0000 | 1.0000 | 0.0000 | 0.0000 | 50000 | 0    | 0     | 50000 | 0    | 0     | .     | .     |
| 50000  | 0.91 | 1    | 0    | 45500 | 0    | 0     | 3.76 | 1.0000 | 1.0000 | 0.0000 | 0.0000 | 50000 | 0    | 0     | 50000 | 0    | 0     | .     | .     |
| 50000  | 0.92 | 1    | 0    | 46000 | 0    | 0     | 3.76 | 1.0000 | 1.0000 | 0.0000 | 0.0000 | 50000 | 0    | 0     | 50000 | 0    | 0     | .     | .     |
| 50000  | 0.93 | 1    | 0    | 46500 | 0    | 0     | 3.76 | 1.0000 | 1.0000 | 0.0000 | 0.0000 | 50000 | 0    | 0     | 50000 | 0    | 0     | .     | .     |
| 50000  | 0.94 | 1    | 0    | 47000 | 0    | 0     | 3.76 | 1.0000 | 1.0000 | 0.0000 | 0.0000 | 50000 | 0    | 0     | 50000 | 0    | 0     | .     | .     |
| 50000  | 0.95 | 1    | 0    | 47500 | 0    | 0     | 3.76 | 1.0000 | 1.0000 | 0.0000 | 0.0000 | 50000 | 0    | 0     | 50000 | 0    | 0     | .     | .     |
| 50000  | 0.96 | 1    | 0    | 48000 | 0    | 0     | 3.76 | 1.0000 | 1.0000 | 0.0000 | 0.0000 | 50000 | 0    | 0     | 50000 | 0    | 0     | .     | .     |
| 50000  | 0.97 | 1    | 0    | 48500 | 0    | 0     | 3.76 | 1.0000 | 1.0000 | 0.0000 | 0.0000 | 50000 | 0    | 0     | 50000 | 0    | 0     | .     | .     |
| 50000  | 0.98 | 1    | 0    | 49000 | 0    | 0     | 3.76 | 1.0000 | 1.0000 | 0.0000 | 0.0000 | 50000 | 0    | 0     | 50000 | 0    | 0     | .     | .     |
| 50000  | 0.99 | 1    | 0    | 49500 | 0    | 0     | 3.76 | 1.0000 | 1.0000 | 0.0000 | 0.0000 | 50000 | 0    | 0     | 50000 | 0    | 0     | .     | .     |
| 50000  | 1.00 | 1    | 0    | 50000 | 0    | 0     | 3.76 | 1.0000 | 1.0000 | 0.0000 | 0.0000 | 50000 | 0    | 0     | 50000 | 0    | 0     | .     | .     |
| 50000  | 1.01 | 1    | 0    | 50500 | 0    | 0     | 3.76 | 1.0000 | 1.0000 | 0.0000 | 0.0000 | 50000 | 0    | 0     | 50000 | 0    | 0     | .     | .     |
| 50000  | 1.02 | 1    | 0    | 51000 | 0    | 0     | 3.76 | 1.0000 | 1.0000 | 0.0000 | 0.0000 | 50000 | 0    | 0     | 50000 | 0    | 0     | .     | .     |
| 50000  | 1.03 | 1    | 0    | 51500 | 0    | 0     | 3.76 | 1.0000 | 1.0000 | 0.0000 | 0.0000 | 50000 | 0    | 0     | 50000 | 0    | 0     | .     | .     |
| 50000  | 1.04 | 1    | 0    | 52000 | 0    | 0     | 3.76 | 1.0000 | 1.0000 | 0.0000 | 0.0000 | 50000 | 0    | 0     | 50000 | 0    | 0     | .     | .     |
| 50000  | 1.05 | 1    | 0    | 52500 | 0    | 0     | 3.76 | 1.0000 | 1.0000 | 0.0000 | 0.0000 | 50000 | 0    | 0     | 50000 | 0    | 0     | .     | .     |
| 50000  | 1.06 | 1    | 0    | 53000 | 0    | 0     | 3.76 | 1.0000 | 1.0000 | 0.0000 | 0.0000 | 50000 | 0    | 0     | 50000 | 0    | 0     | .     | .     |
| 50000  | 1.07 | 1    | 0    | 53500 | 0    | 0     | 3.76 | 1.0000 | 1.0000 | 0.0000 | 0.0000 | 50000 | 0    | 0     | 50000 | 0    | 0     | .     | .     |
| 50000  | 1.08 | 1    | 0    | 54000 | 0    | 0     | 3.76 | 1.0000 | 1.0000 | 0.0000 | 0.0000 | 50000 | 0    | 0     | 50000 | 0    | 0     | .     | .     |
| 50000  | 1.09 | 1    | 0    | 54500 | 0    | 0     | 3.76 | 1.0000 | 1.0000 | 0.0000 | 0.0000 | 50000 | 0    | 0     | 50000 | 0    | 0     | .     | .     |
| 50000  | 1.10 | 1    | 0    | 55000 | 0    | 0     | 3.76 | 1.0000 | 1.0000 | 0.0000 | 0.0000 | 50000 | 0    | 0     | 50000 | 0    | 0     | .     | .     |
| 50000  | 1.11 | 1    | 0    | 55500 | 0    | 0     | 3.76 | 1.0000 | 1.0000 | 0.0000 | 0.0000 | 50000 | 0    | 0     | 50000 | 0    | 0     | .     | .     |
| 50000  | 1.12 | 1    | 0    | 56000 | 0    | 0     | 3.76 | 1.0000 | 1.0000 | 0.0000 | 0.0000 | 50000 | 0    | 0     | 50000 | 0    | 0     | .     | .     |
| 50000  | 1.13 | 1    | 0    | 56500 | 0    | 0     | 3.76 | 1.0000 | 1.0000 | 0.0000 | 0.0000 | 50000 | 0    | 0     | 50000 | 0    | 0     | .     | .     |
| 50000  | 1.14 | 1    | 0    | 57000 | 0    | 0     | 3.76 | 1.0000 | 1.0000 | 0.0000 | 0.0000 | 50000 | 0    | 0     | 50000 | 0    | 0     | .     | .     |
| 50000  | 1.15 | 1    | 0    | 57500 | 0    | 0     | 3.76 | 1.0000 | 1.0000 | 0.0000 | 0.0000 | 50000 | 0    | 0     | 50000 | 0    | 0     | .     | .     |
| 50000  | 1.16 | 1    | 0    | 58000 | 0    | 0     | 3.76 | 1.0000 | 1.0000 | 0.0000 | 0.0000 | 50000 | 0    | 0     | 50000 | 0    | 0     | .     | .     |
| 50000  | 1.17 | 1    | 0    | 58500 | 0    | 0     | 3.76 | 1.0000 | 1.0000 | 0.0000 | 0.0000 | 50000 | 0    | 0     | 50000 | 0    | 0     | .     | .     |
| 50000  | 1.18 | 1    | 0    | 59000 | 0    | 0     | 3.76 | 1.0000 | 1.0000 | 0.0000 | 0.0000 | 50000 | 0    | 0     | 50000 | 0    | 0     | .     | .     |
| 50000  | 1.19 | 1    | 0    | 59500 | 0    | 0     | 3.76 | 1.0000 | 1.0000 | 0.0000 | 0.0000 | 50000 | 0    | 0     | 50000 | 0    | 0     | .     | .     |
| 50000  | 1.20 | 1    | 0    | 60000 | 0    | 0     | 3.76 | 1.0000 | 1.0000 | 0.0000 | 0.0000 | 50000 | 0    | 0     | 50000 | 0    | 0     | .     | .     |
| 100000 | 0.80 | 0.05 | 0.95 | 200   | 9500 | 90250 | 9.20 | 0.0490 | 0.0510 | 0.9490 | 0.9510 | 241   | 9328 | 90432 | 260   | 9672 | 90069 | 10.37 | 17.12 |
| 100000 | 0.81 | 0.05 | 0.95 | 203   | 9500 | 90250 | 8.30 | 0.0490 | 0.0510 | 0.9490 | 0.9510 | 241   | 9328 | 90432 | 260   | 9672 | 90069 | 9.56  | 15.99 |

|        |      |      |      |     |      |       |      |        |        |        |        |     |      |       |     |      |       |       |       |
|--------|------|------|------|-----|------|-------|------|--------|--------|--------|--------|-----|------|-------|-----|------|-------|-------|-------|
| 100000 | 0.82 | 0.05 | 0.95 | 205 | 9500 | 90250 | 7.44 | 0.0490 | 0.0510 | 0.9490 | 0.9510 | 241 | 9328 | 90432 | 260 | 9672 | 90069 | 8.79  | 14.92 |
| 100000 | 0.83 | 0.05 | 0.95 | 208 | 9500 | 90250 | 6.63 | 0.0490 | 0.0510 | 0.9490 | 0.9510 | 241 | 9328 | 90432 | 260 | 9672 | 90069 | 8.08  | 13.89 |
| 100000 | 0.84 | 0.05 | 0.95 | 210 | 9500 | 90250 | 5.87 | 0.0490 | 0.0510 | 0.9490 | 0.9510 | 241 | 9328 | 90432 | 260 | 9672 | 90069 | 7.42  | 12.91 |
| 100000 | 0.85 | 0.05 | 0.95 | 213 | 9500 | 90250 | 5.15 | 0.0490 | 0.0510 | 0.9490 | 0.9510 | 241 | 9328 | 90432 | 260 | 9672 | 90069 | 6.81  | 11.97 |
| 100000 | 0.86 | 0.05 | 0.95 | 215 | 9500 | 90250 | 4.48 | 0.0490 | 0.0510 | 0.9490 | 0.9510 | 241 | 9328 | 90432 | 260 | 9672 | 90069 | 6.25  | 11.09 |
| 100000 | 0.87 | 0.05 | 0.95 | 218 | 9500 | 90250 | 3.86 | 0.0490 | 0.0510 | 0.9490 | 0.9510 | 241 | 9328 | 90432 | 260 | 9672 | 90069 | 5.75  | 10.26 |
| 100000 | 0.88 | 0.05 | 0.95 | 220 | 9500 | 90250 | 3.29 | 0.0490 | 0.0510 | 0.9490 | 0.9510 | 241 | 9328 | 90432 | 260 | 9672 | 90069 | 5.29  | 9.47  |
| 100000 | 0.89 | 0.05 | 0.95 | 223 | 9500 | 90250 | 2.76 | 0.0490 | 0.0510 | 0.9490 | 0.9510 | 241 | 9328 | 90432 | 260 | 9672 | 90069 | 4.89  | 8.73  |
| 100000 | 0.90 | 0.05 | 0.95 | 225 | 9500 | 90250 | 2.28 | 0.0490 | 0.0510 | 0.9490 | 0.9510 | 241 | 9328 | 90432 | 260 | 9672 | 90069 | 4.54  | 8.04  |
| 100000 | 0.91 | 0.05 | 0.95 | 228 | 9500 | 90250 | 1.84 | 0.0490 | 0.0510 | 0.9490 | 0.9510 | 241 | 9328 | 90432 | 260 | 9672 | 90069 | 4.25  | 7.39  |
| 100000 | 0.92 | 0.05 | 0.95 | 230 | 9500 | 90250 | 1.46 | 0.0490 | 0.0510 | 0.9490 | 0.9510 | 241 | 9328 | 90432 | 260 | 9672 | 90069 | 4.00  | 6.80  |
| 100000 | 0.93 | 0.05 | 0.95 | 233 | 9500 | 90250 | 1.11 | 0.0490 | 0.0510 | 0.9490 | 0.9510 | 241 | 9328 | 90432 | 260 | 9672 | 90069 | 3.81  | 6.25  |
| 100000 | 0.94 | 0.05 | 0.95 | 235 | 9500 | 90250 | 0.82 | 0.0490 | 0.0510 | 0.9490 | 0.9510 | 241 | 9328 | 90432 | 260 | 9672 | 90069 | 3.67  | 5.75  |
| 100000 | 0.95 | 0.05 | 0.95 | 238 | 9500 | 90250 | 0.57 | 0.0490 | 0.0510 | 0.9490 | 0.9510 | 241 | 9328 | 90432 | 260 | 9672 | 90069 | 3.58  | 5.30  |
| 100000 | 0.96 | 0.05 | 0.95 | 240 | 9500 | 90250 | 0.36 | 0.0490 | 0.0510 | 0.9490 | 0.9510 | 241 | 9328 | 90432 | 260 | 9672 | 90069 | 3.54  | 4.90  |
| 100000 | 0.97 | 0.05 | 0.95 | 243 | 9500 | 90250 | 0.20 | 0.0490 | 0.0510 | 0.9490 | 0.9510 | 241 | 9328 | 90432 | 260 | 9672 | 90069 | 3.56  | 4.55  |
| 100000 | 0.98 | 0.05 | 0.95 | 245 | 9500 | 90250 | 0.09 | 0.0490 | 0.0510 | 0.9490 | 0.9510 | 241 | 9328 | 90432 | 260 | 9672 | 90069 | 3.62  | 4.24  |
| 100000 | 0.99 | 0.05 | 0.95 | 248 | 9500 | 90250 | 0.02 | 0.0490 | 0.0510 | 0.9490 | 0.9510 | 241 | 9328 | 90432 | 260 | 9672 | 90069 | 3.74  | 3.98  |
| 100000 | 1.00 | 0.05 | 0.95 | 250 | 9500 | 90250 | 0.00 | 0.0490 | 0.0510 | 0.9490 | 0.9510 | 241 | 9328 | 90432 | 260 | 9672 | 90069 | 3.91  | 3.77  |
| 100000 | 1.01 | 0.05 | 0.95 | 253 | 9500 | 90250 | 0.02 | 0.0490 | 0.0510 | 0.9490 | 0.9510 | 241 | 9328 | 90432 | 260 | 9672 | 90069 | 4.14  | 3.61  |
| 100000 | 1.02 | 0.05 | 0.95 | 255 | 9500 | 90250 | 0.09 | 0.0490 | 0.0510 | 0.9490 | 0.9510 | 241 | 9328 | 90432 | 260 | 9672 | 90069 | 4.41  | 3.50  |
| 100000 | 1.03 | 0.05 | 0.95 | 258 | 9500 | 90250 | 0.20 | 0.0490 | 0.0510 | 0.9490 | 0.9510 | 241 | 9328 | 90432 | 260 | 9672 | 90069 | 4.74  | 3.43  |
| 100000 | 1.04 | 0.05 | 0.95 | 260 | 9500 | 90250 | 0.36 | 0.0490 | 0.0510 | 0.9490 | 0.9510 | 241 | 9328 | 90432 | 260 | 9672 | 90069 | 5.11  | 3.42  |
| 100000 | 1.05 | 0.05 | 0.95 | 263 | 9500 | 90250 | 0.56 | 0.0490 | 0.0510 | 0.9490 | 0.9510 | 241 | 9328 | 90432 | 260 | 9672 | 90069 | 5.55  | 3.45  |
| 100000 | 1.06 | 0.05 | 0.95 | 265 | 9500 | 90250 | 0.81 | 0.0490 | 0.0510 | 0.9490 | 0.9510 | 241 | 9328 | 90432 | 260 | 9672 | 90069 | 6.03  | 3.53  |
| 100000 | 1.07 | 0.05 | 0.95 | 268 | 9500 | 90250 | 1.10 | 0.0490 | 0.0510 | 0.9490 | 0.9510 | 241 | 9328 | 90432 | 260 | 9672 | 90069 | 6.56  | 3.65  |
| 100000 | 1.08 | 0.05 | 0.95 | 270 | 9500 | 90250 | 1.43 | 0.0490 | 0.0510 | 0.9490 | 0.9510 | 241 | 9328 | 90432 | 260 | 9672 | 90069 | 7.15  | 3.83  |
| 100000 | 1.09 | 0.05 | 0.95 | 273 | 9500 | 90250 | 1.81 | 0.0490 | 0.0510 | 0.9490 | 0.9510 | 241 | 9328 | 90432 | 260 | 9672 | 90069 | 7.79  | 4.05  |
| 100000 | 1.10 | 0.05 | 0.95 | 275 | 9500 | 90250 | 2.23 | 0.0490 | 0.0510 | 0.9490 | 0.9510 | 241 | 9328 | 90432 | 260 | 9672 | 90069 | 8.48  | 4.32  |
| 100000 | 1.11 | 0.05 | 0.95 | 278 | 9500 | 90250 | 2.70 | 0.0490 | 0.0510 | 0.9490 | 0.9510 | 241 | 9328 | 90432 | 260 | 9672 | 90069 | 9.22  | 4.64  |
| 100000 | 1.12 | 0.05 | 0.95 | 280 | 9500 | 90250 | 3.21 | 0.0490 | 0.0510 | 0.9490 | 0.9510 | 241 | 9328 | 90432 | 260 | 9672 | 90069 | 10.01 | 5.01  |
| 100000 | 1.13 | 0.05 | 0.95 | 283 | 9500 | 90250 | 3.77 | 0.0490 | 0.0510 | 0.9490 | 0.9510 | 241 | 9328 | 90432 | 260 | 9672 | 90069 | 10.86 | 5.43  |
| 100000 | 1.14 | 0.05 | 0.95 | 285 | 9500 | 90250 | 4.36 | 0.0490 | 0.0510 | 0.9490 | 0.9510 | 241 | 9328 | 90432 | 260 | 9672 | 90069 | 11.76 | 5.89  |
| 100000 | 1.15 | 0.05 | 0.95 | 288 | 9500 | 90250 | 5.00 | 0.0490 | 0.0510 | 0.9490 | 0.9510 | 241 | 9328 | 90432 | 260 | 9672 | 90069 | 12.71 | 6.40  |
| 100000 | 1.16 | 0.05 | 0.95 | 290 | 9500 | 90250 | 5.69 | 0.0490 | 0.0510 | 0.9490 | 0.9510 | 241 | 9328 | 90432 | 260 | 9672 | 90069 | 13.71 | 6.96  |

|        |      |      |      |      |       |       |       |        |        |        |        |     |       |       |      |       |       |       |       |
|--------|------|------|------|------|-------|-------|-------|--------|--------|--------|--------|-----|-------|-------|------|-------|-------|-------|-------|
| 100000 | 1.17 | 0.05 | 0.95 | 293  | 9500  | 90250 | 6.41  | 0.0490 | 0.0510 | 0.9490 | 0.9510 | 241 | 9328  | 90432 | 260  | 9672  | 90069 | 14.76 | 7.57  |
| 100000 | 1.18 | 0.05 | 0.95 | 295  | 9500  | 90250 | 7.18  | 0.0490 | 0.0510 | 0.9490 | 0.9510 | 241 | 9328  | 90432 | 260  | 9672  | 90069 | 15.87 | 8.23  |
| 100000 | 1.19 | 0.05 | 0.95 | 298  | 9500  | 90250 | 8.00  | 0.0490 | 0.0510 | 0.9490 | 0.9510 | 241 | 9328  | 90432 | 260  | 9672  | 90069 | 17.03 | 8.93  |
| 100000 | 1.20 | 0.05 | 0.95 | 300  | 9500  | 90250 | 8.85  | 0.0490 | 0.0510 | 0.9490 | 0.9510 | 241 | 9328  | 90432 | 260  | 9672  | 90069 | 18.24 | 9.69  |
| 100000 | 0.80 | 0.1  | 0.9  | 800  | 18000 | 81000 | 33.67 | 0.0987 | 0.1013 | 0.8987 | 0.9013 | 974 | 17789 | 81237 | 1026 | 18210 | 80764 | 34.23 | 53.08 |
| 100000 | 0.81 | 0.1  | 0.9  | 810  | 18000 | 81000 | 30.33 | 0.0987 | 0.1013 | 0.8987 | 0.9013 | 974 | 17789 | 81237 | 1026 | 18210 | 80764 | 30.76 | 48.77 |
| 100000 | 0.82 | 0.1  | 0.9  | 820  | 18000 | 81000 | 27.17 | 0.0987 | 0.1013 | 0.8987 | 0.9013 | 974 | 17789 | 81237 | 1026 | 18210 | 80764 | 27.50 | 44.64 |
| 100000 | 0.83 | 0.1  | 0.9  | 830  | 18000 | 81000 | 24.18 | 0.0987 | 0.1013 | 0.8987 | 0.9013 | 974 | 17789 | 81237 | 1026 | 18210 | 80764 | 24.44 | 40.72 |
| 100000 | 0.84 | 0.1  | 0.9  | 840  | 18000 | 81000 | 21.38 | 0.0987 | 0.1013 | 0.8987 | 0.9013 | 974 | 17789 | 81237 | 1026 | 18210 | 80764 | 21.59 | 36.99 |
| 100000 | 0.85 | 0.1  | 0.9  | 850  | 18000 | 81000 | 18.76 | 0.0987 | 0.1013 | 0.8987 | 0.9013 | 974 | 17789 | 81237 | 1026 | 18210 | 80764 | 18.94 | 33.45 |
| 100000 | 0.86 | 0.1  | 0.9  | 860  | 18000 | 81000 | 16.31 | 0.0987 | 0.1013 | 0.8987 | 0.9013 | 974 | 17789 | 81237 | 1026 | 18210 | 80764 | 16.50 | 30.11 |
| 100000 | 0.87 | 0.1  | 0.9  | 870  | 18000 | 81000 | 14.03 | 0.0987 | 0.1013 | 0.8987 | 0.9013 | 974 | 17789 | 81237 | 1026 | 18210 | 80764 | 14.27 | 26.97 |
| 100000 | 0.88 | 0.1  | 0.9  | 880  | 18000 | 81000 | 11.93 | 0.0987 | 0.1013 | 0.8987 | 0.9013 | 974 | 17789 | 81237 | 1026 | 18210 | 80764 | 12.24 | 24.01 |
| 100000 | 0.89 | 0.1  | 0.9  | 890  | 18000 | 81000 | 10.01 | 0.0987 | 0.1013 | 0.8987 | 0.9013 | 974 | 17789 | 81237 | 1026 | 18210 | 80764 | 10.41 | 21.26 |
| 100000 | 0.90 | 0.1  | 0.9  | 900  | 18000 | 81000 | 8.26  | 0.0987 | 0.1013 | 0.8987 | 0.9013 | 974 | 17789 | 81237 | 1026 | 18210 | 80764 | 8.79  | 18.70 |
| 100000 | 0.91 | 0.1  | 0.9  | 910  | 18000 | 81000 | 6.67  | 0.0987 | 0.1013 | 0.8987 | 0.9013 | 974 | 17789 | 81237 | 1026 | 18210 | 80764 | 7.38  | 16.33 |
| 100000 | 0.92 | 0.1  | 0.9  | 920  | 18000 | 81000 | 5.26  | 0.0987 | 0.1013 | 0.8987 | 0.9013 | 974 | 17789 | 81237 | 1026 | 18210 | 80764 | 6.17  | 14.16 |
| 100000 | 0.93 | 0.1  | 0.9  | 930  | 18000 | 81000 | 4.02  | 0.0987 | 0.1013 | 0.8987 | 0.9013 | 974 | 17789 | 81237 | 1026 | 18210 | 80764 | 5.16  | 12.18 |
| 100000 | 0.94 | 0.1  | 0.9  | 940  | 18000 | 81000 | 2.95  | 0.0987 | 0.1013 | 0.8987 | 0.9013 | 974 | 17789 | 81237 | 1026 | 18210 | 80764 | 4.36  | 10.40 |
| 100000 | 0.95 | 0.1  | 0.9  | 950  | 18000 | 81000 | 2.04  | 0.0987 | 0.1013 | 0.8987 | 0.9013 | 974 | 17789 | 81237 | 1026 | 18210 | 80764 | 3.77  | 8.81  |
| 100000 | 0.96 | 0.1  | 0.9  | 960  | 18000 | 81000 | 1.31  | 0.0987 | 0.1013 | 0.8987 | 0.9013 | 974 | 17789 | 81237 | 1026 | 18210 | 80764 | 3.38  | 7.42  |
| 100000 | 0.97 | 0.1  | 0.9  | 970  | 18000 | 81000 | 0.73  | 0.0987 | 0.1013 | 0.8987 | 0.9013 | 974 | 17789 | 81237 | 1026 | 18210 | 80764 | 3.20  | 6.22  |
| 100000 | 0.98 | 0.1  | 0.9  | 980  | 18000 | 81000 | 0.33  | 0.0987 | 0.1013 | 0.8987 | 0.9013 | 974 | 17789 | 81237 | 1026 | 18210 | 80764 | 3.22  | 5.22  |
| 100000 | 0.99 | 0.1  | 0.9  | 990  | 18000 | 81000 | 0.08  | 0.0987 | 0.1013 | 0.8987 | 0.9013 | 974 | 17789 | 81237 | 1026 | 18210 | 80764 | 3.45  | 4.41  |
| 100000 | 1.00 | 0.1  | 0.9  | 1000 | 18000 | 81000 | 0.00  | 0.0987 | 0.1013 | 0.8987 | 0.9013 | 974 | 17789 | 81237 | 1026 | 18210 | 80764 | 3.89  | 3.80  |
| 100000 | 1.01 | 0.1  | 0.9  | 1010 | 18000 | 81000 | 0.08  | 0.0987 | 0.1013 | 0.8987 | 0.9013 | 974 | 17789 | 81237 | 1026 | 18210 | 80764 | 4.53  | 3.38  |
| 100000 | 1.02 | 0.1  | 0.9  | 1020 | 18000 | 81000 | 0.32  | 0.0987 | 0.1013 | 0.8987 | 0.9013 | 974 | 17789 | 81237 | 1026 | 18210 | 80764 | 5.37  | 3.16  |
| 100000 | 1.03 | 0.1  | 0.9  | 1030 | 18000 | 81000 | 0.72  | 0.0987 | 0.1013 | 0.8987 | 0.9013 | 974 | 17789 | 81237 | 1026 | 18210 | 80764 | 6.42  | 3.13  |
| 100000 | 1.04 | 0.1  | 0.9  | 1040 | 18000 | 81000 | 1.29  | 0.0987 | 0.1013 | 0.8987 | 0.9013 | 974 | 17789 | 81237 | 1026 | 18210 | 80764 | 7.68  | 3.29  |
| 100000 | 1.05 | 0.1  | 0.9  | 1050 | 18000 | 81000 | 2.01  | 0.0987 | 0.1013 | 0.8987 | 0.9013 | 974 | 17789 | 81237 | 1026 | 18210 | 80764 | 9.14  | 3.65  |
| 100000 | 1.06 | 0.1  | 0.9  | 1060 | 18000 | 81000 | 2.88  | 0.0987 | 0.1013 | 0.8987 | 0.9013 | 974 | 17789 | 81237 | 1026 | 18210 | 80764 | 10.80 | 4.21  |
| 100000 | 1.07 | 0.1  | 0.9  | 1070 | 18000 | 81000 | 3.92  | 0.0987 | 0.1013 | 0.8987 | 0.9013 | 974 | 17789 | 81237 | 1026 | 18210 | 80764 | 12.67 | 4.96  |
| 100000 | 1.08 | 0.1  | 0.9  | 1080 | 18000 | 81000 | 5.11  | 0.0987 | 0.1013 | 0.8987 | 0.9013 | 974 | 17789 | 81237 | 1026 | 18210 | 80764 | 14.75 | 5.91  |
| 100000 | 1.09 | 0.1  | 0.9  | 1090 | 18000 | 81000 | 6.45  | 0.0987 | 0.1013 | 0.8987 | 0.9013 | 974 | 17789 | 81237 | 1026 | 18210 | 80764 | 17.03 | 7.05  |
| 100000 | 1.10 | 0.1  | 0.9  | 1100 | 18000 | 81000 | 7.95  | 0.0987 | 0.1013 | 0.8987 | 0.9013 | 974 | 17789 | 81237 | 1026 | 18210 | 80764 | 19.52 | 8.38  |



|        |      |      |      |      |       |       |       |        |        |        |        |      |       |       |      |       |       |       |        |
|--------|------|------|------|------|-------|-------|-------|--------|--------|--------|--------|------|-------|-------|------|-------|-------|-------|--------|
| 100000 | 1.11 | 0.1  | 0.9  | 1110 | 18000 | 81000 | 9.60  | 0.0987 | 0.1013 | 0.8987 | 0.9013 | 974  | 17789 | 81237 | 1026 | 18210 | 80764 | 22.21 | 9.91   |
| 100000 | 1.12 | 0.1  | 0.9  | 1120 | 18000 | 81000 | 11.40 | 0.0987 | 0.1013 | 0.8987 | 0.9013 | 974  | 17789 | 81237 | 1026 | 18210 | 80764 | 25.11 | 11.64  |
| 100000 | 1.13 | 0.1  | 0.9  | 1130 | 18000 | 81000 | 13.36 | 0.0987 | 0.1013 | 0.8987 | 0.9013 | 974  | 17789 | 81237 | 1026 | 18210 | 80764 | 28.21 | 13.56  |
| 100000 | 1.14 | 0.1  | 0.9  | 1140 | 18000 | 81000 | 15.46 | 0.0987 | 0.1013 | 0.8987 | 0.9013 | 974  | 17789 | 81237 | 1026 | 18210 | 80764 | 31.52 | 15.67  |
| 100000 | 1.15 | 0.1  | 0.9  | 1150 | 18000 | 81000 | 17.72 | 0.0987 | 0.1013 | 0.8987 | 0.9013 | 974  | 17789 | 81237 | 1026 | 18210 | 80764 | 35.04 | 17.98  |
| 100000 | 1.16 | 0.1  | 0.9  | 1160 | 18000 | 81000 | 20.12 | 0.0987 | 0.1013 | 0.8987 | 0.9013 | 974  | 17789 | 81237 | 1026 | 18210 | 80764 | 38.76 | 20.49  |
| 100000 | 1.17 | 0.1  | 0.9  | 1170 | 18000 | 81000 | 22.67 | 0.0987 | 0.1013 | 0.8987 | 0.9013 | 974  | 17789 | 81237 | 1026 | 18210 | 80764 | 42.68 | 23.18  |
| 100000 | 1.18 | 0.1  | 0.9  | 1180 | 18000 | 81000 | 25.37 | 0.0987 | 0.1013 | 0.8987 | 0.9013 | 974  | 17789 | 81237 | 1026 | 18210 | 80764 | 46.81 | 26.08  |
| 100000 | 1.19 | 0.1  | 0.9  | 1190 | 18000 | 81000 | 28.21 | 0.0987 | 0.1013 | 0.8987 | 0.9013 | 974  | 17789 | 81237 | 1026 | 18210 | 80764 | 51.15 | 29.17  |
| 100000 | 1.20 | 0.1  | 0.9  | 1200 | 18000 | 81000 | 31.20 | 0.0987 | 0.1013 | 0.8987 | 0.9013 | 974  | 17789 | 81237 | 1026 | 18210 | 80764 | 55.69 | 32.45  |
| 100000 | 0.80 | 0.15 | 0.85 | 1800 | 25500 | 72250 | 68.80 | 0.1484 | 0.1516 | 0.8484 | 0.8516 | 2203 | 25280 | 72516 | 2297 | 25719 | 71984 | 76.71 | 110.45 |
| 100000 | 0.81 | 0.15 | 0.85 | 1823 | 25500 | 72250 | 61.91 | 0.1484 | 0.1516 | 0.8484 | 0.8516 | 2203 | 25280 | 72516 | 2297 | 25719 | 71984 | 68.70 | 100.93 |
| 100000 | 0.82 | 0.15 | 0.85 | 1845 | 25500 | 72250 | 55.41 | 0.1484 | 0.1516 | 0.8484 | 0.8516 | 2203 | 25280 | 72516 | 2297 | 25719 | 71984 | 61.15 | 91.85  |
| 100000 | 0.83 | 0.15 | 0.85 | 1868 | 25500 | 72250 | 49.28 | 0.1484 | 0.1516 | 0.8484 | 0.8516 | 2203 | 25280 | 72516 | 2297 | 25719 | 71984 | 54.06 | 83.21  |
| 100000 | 0.84 | 0.15 | 0.85 | 1890 | 25500 | 72250 | 43.53 | 0.1484 | 0.1516 | 0.8484 | 0.8516 | 2203 | 25280 | 72516 | 2297 | 25719 | 71984 | 47.43 | 75.02  |
| 100000 | 0.85 | 0.15 | 0.85 | 1913 | 25500 | 72250 | 38.15 | 0.1484 | 0.1516 | 0.8484 | 0.8516 | 2203 | 25280 | 72516 | 2297 | 25719 | 71984 | 41.27 | 67.26  |
| 100000 | 0.86 | 0.15 | 0.85 | 1935 | 25500 | 72250 | 33.14 | 0.1484 | 0.1516 | 0.8484 | 0.8516 | 2203 | 25280 | 72516 | 2297 | 25719 | 71984 | 35.56 | 59.95  |
| 100000 | 0.87 | 0.15 | 0.85 | 1958 | 25500 | 72250 | 28.49 | 0.1484 | 0.1516 | 0.8484 | 0.8516 | 2203 | 25280 | 72516 | 2297 | 25719 | 71984 | 30.31 | 53.07  |
| 100000 | 0.88 | 0.15 | 0.85 | 1980 | 25500 | 72250 | 24.21 | 0.1484 | 0.1516 | 0.8484 | 0.8516 | 2203 | 25280 | 72516 | 2297 | 25719 | 71984 | 25.52 | 46.64  |
| 100000 | 0.89 | 0.15 | 0.85 | 2003 | 25500 | 72250 | 20.29 | 0.1484 | 0.1516 | 0.8484 | 0.8516 | 2203 | 25280 | 72516 | 2297 | 25719 | 71984 | 21.18 | 40.64  |
| 100000 | 0.90 | 0.15 | 0.85 | 2025 | 25500 | 72250 | 16.72 | 0.1484 | 0.1516 | 0.8484 | 0.8516 | 2203 | 25280 | 72516 | 2297 | 25719 | 71984 | 17.31 | 35.09  |
| 100000 | 0.91 | 0.15 | 0.85 | 2048 | 25500 | 72250 | 13.50 | 0.1484 | 0.1516 | 0.8484 | 0.8516 | 2203 | 25280 | 72516 | 2297 | 25719 | 71984 | 13.90 | 29.98  |
| 100000 | 0.92 | 0.15 | 0.85 | 2070 | 25500 | 72250 | 10.64 | 0.1484 | 0.1516 | 0.8484 | 0.8516 | 2203 | 25280 | 72516 | 2297 | 25719 | 71984 | 10.95 | 25.31  |
| 100000 | 0.93 | 0.15 | 0.85 | 2093 | 25500 | 72250 | 8.12  | 0.1484 | 0.1516 | 0.8484 | 0.8516 | 2203 | 25280 | 72516 | 2297 | 25719 | 71984 | 8.46  | 21.08  |
| 100000 | 0.94 | 0.15 | 0.85 | 2115 | 25500 | 72250 | 5.95  | 0.1484 | 0.1516 | 0.8484 | 0.8516 | 2203 | 25280 | 72516 | 2297 | 25719 | 71984 | 6.42  | 17.29  |
| 100000 | 0.95 | 0.15 | 0.85 | 2138 | 25500 | 72250 | 4.12  | 0.1484 | 0.1516 | 0.8484 | 0.8516 | 2203 | 25280 | 72516 | 2297 | 25719 | 71984 | 4.85  | 13.94  |
| 100000 | 0.96 | 0.15 | 0.85 | 2160 | 25500 | 72250 | 2.63  | 0.1484 | 0.1516 | 0.8484 | 0.8516 | 2203 | 25280 | 72516 | 2297 | 25719 | 71984 | 3.74  | 11.03  |
| 100000 | 0.97 | 0.15 | 0.85 | 2183 | 25500 | 72250 | 1.48  | 0.1484 | 0.1516 | 0.8484 | 0.8516 | 2203 | 25280 | 72516 | 2297 | 25719 | 71984 | 3.08  | 8.57   |
| 100000 | 0.98 | 0.15 | 0.85 | 2205 | 25500 | 72250 | 0.65  | 0.1484 | 0.1516 | 0.8484 | 0.8516 | 2203 | 25280 | 72516 | 2297 | 25719 | 71984 | 2.89  | 6.54   |
| 100000 | 0.99 | 0.15 | 0.85 | 2228 | 25500 | 72250 | 0.16  | 0.1484 | 0.1516 | 0.8484 | 0.8516 | 2203 | 25280 | 72516 | 2297 | 25719 | 71984 | 3.15  | 4.95   |
| 100000 | 1.00 | 0.15 | 0.85 | 2250 | 25500 | 72250 | 0.00  | 0.1484 | 0.1516 | 0.8484 | 0.8516 | 2203 | 25280 | 72516 | 2297 | 25719 | 71984 | 3.88  | 3.81   |
| 100000 | 1.01 | 0.15 | 0.85 | 2273 | 25500 | 72250 | 0.16  | 0.1484 | 0.1516 | 0.8484 | 0.8516 | 2203 | 25280 | 72516 | 2297 | 25719 | 71984 | 5.06  | 3.10   |
| 100000 | 1.02 | 0.15 | 0.85 | 2295 | 25500 | 72250 | 0.65  | 0.1484 | 0.1516 | 0.8484 | 0.8516 | 2203 | 25280 | 72516 | 2297 | 25719 | 71984 | 6.70  | 2.84   |
| 100000 | 1.03 | 0.15 | 0.85 | 2318 | 25500 | 72250 | 1.45  | 0.1484 | 0.1516 | 0.8484 | 0.8516 | 2203 | 25280 | 72516 | 2297 | 25719 | 71984 | 8.80  | 3.02   |
| 100000 | 1.04 | 0.15 | 0.85 | 2340 | 25500 | 72250 | 2.57  | 0.1484 | 0.1516 | 0.8484 | 0.8516 | 2203 | 25280 | 72516 | 2297 | 25719 | 71984 | 11.37 | 3.64   |

|        |      |      |      |      |       |       |        |        |        |        |        |      |       |       |      |       |       |        |        |
|--------|------|------|------|------|-------|-------|--------|--------|--------|--------|--------|------|-------|-------|------|-------|-------|--------|--------|
| 100000 | 1.05 | 0.15 | 0.85 | 2363 | 25500 | 72250 | 4.01   | 0.1484 | 0.1516 | 0.8484 | 0.8516 | 2203 | 25280 | 72516 | 2297 | 25719 | 71984 | 14.39  | 4.70   |
| 100000 | 1.06 | 0.15 | 0.85 | 2385 | 25500 | 72250 | 5.76   | 0.1484 | 0.1516 | 0.8484 | 0.8516 | 2203 | 25280 | 72516 | 2297 | 25719 | 71984 | 17.87  | 6.20   |
| 100000 | 1.07 | 0.15 | 0.85 | 2408 | 25500 | 72250 | 7.81   | 0.1484 | 0.1516 | 0.8484 | 0.8516 | 2203 | 25280 | 72516 | 2297 | 25719 | 71984 | 21.81  | 8.14   |
| 100000 | 1.08 | 0.15 | 0.85 | 2430 | 25500 | 72250 | 10.18  | 0.1484 | 0.1516 | 0.8484 | 0.8516 | 2203 | 25280 | 72516 | 2297 | 25719 | 71984 | 26.21  | 10.52  |
| 100000 | 1.09 | 0.15 | 0.85 | 2453 | 25500 | 72250 | 12.85  | 0.1484 | 0.1516 | 0.8484 | 0.8516 | 2203 | 25280 | 72516 | 2297 | 25719 | 71984 | 31.07  | 13.34  |
| 100000 | 1.10 | 0.15 | 0.85 | 2475 | 25500 | 72250 | 15.81  | 0.1484 | 0.1516 | 0.8484 | 0.8516 | 2203 | 25280 | 72516 | 2297 | 25719 | 71984 | 36.39  | 16.60  |
| 100000 | 1.11 | 0.15 | 0.85 | 2498 | 25500 | 72250 | 19.08  | 0.1484 | 0.1516 | 0.8484 | 0.8516 | 2203 | 25280 | 72516 | 2297 | 25719 | 71984 | 42.17  | 20.31  |
| 100000 | 1.12 | 0.15 | 0.85 | 2520 | 25500 | 72250 | 22.65  | 0.1484 | 0.1516 | 0.8484 | 0.8516 | 2203 | 25280 | 72516 | 2297 | 25719 | 71984 | 48.41  | 24.45  |
| 100000 | 1.13 | 0.15 | 0.85 | 2543 | 25500 | 72250 | 26.51  | 0.1484 | 0.1516 | 0.8484 | 0.8516 | 2203 | 25280 | 72516 | 2297 | 25719 | 71984 | 55.11  | 29.03  |
| 100000 | 1.14 | 0.15 | 0.85 | 2565 | 25500 | 72250 | 30.66  | 0.1484 | 0.1516 | 0.8484 | 0.8516 | 2203 | 25280 | 72516 | 2297 | 25719 | 71984 | 62.26  | 34.06  |
| 100000 | 1.15 | 0.15 | 0.85 | 2588 | 25500 | 72250 | 35.10  | 0.1484 | 0.1516 | 0.8484 | 0.8516 | 2203 | 25280 | 72516 | 2297 | 25719 | 71984 | 69.88  | 39.53  |
| 100000 | 1.16 | 0.15 | 0.85 | 2610 | 25500 | 72250 | 39.83  | 0.1484 | 0.1516 | 0.8484 | 0.8516 | 2203 | 25280 | 72516 | 2297 | 25719 | 71984 | 77.96  | 45.43  |
| 100000 | 1.17 | 0.15 | 0.85 | 2633 | 25500 | 72250 | 44.84  | 0.1484 | 0.1516 | 0.8484 | 0.8516 | 2203 | 25280 | 72516 | 2297 | 25719 | 71984 | 86.49  | 51.78  |
| 100000 | 1.18 | 0.15 | 0.85 | 2655 | 25500 | 72250 | 50.14  | 0.1484 | 0.1516 | 0.8484 | 0.8516 | 2203 | 25280 | 72516 | 2297 | 25719 | 71984 | 95.49  | 58.57  |
| 100000 | 1.19 | 0.15 | 0.85 | 2678 | 25500 | 72250 | 55.71  | 0.1484 | 0.1516 | 0.8484 | 0.8516 | 2203 | 25280 | 72516 | 2297 | 25719 | 71984 | 104.95 | 65.80  |
| 100000 | 1.20 | 0.15 | 0.85 | 2700 | 25500 | 72250 | 61.57  | 0.1484 | 0.1516 | 0.8484 | 0.8516 | 2203 | 25280 | 72516 | 2297 | 25719 | 71984 | 114.86 | 73.47  |
| 100000 | 0.80 | 0.2  | 0.8  | 3200 | 32000 | 64000 | 110.22 | 0.1982 | 0.2018 | 0.7982 | 0.8018 | 3930 | 31789 | 64281 | 4070 | 32210 | 63720 | 138.29 | 188.73 |
| 100000 | 0.81 | 0.2  | 0.8  | 3240 | 32000 | 64000 | 99.10  | 0.1982 | 0.2018 | 0.7982 | 0.8018 | 3930 | 31789 | 64281 | 4070 | 32210 | 63720 | 123.83 | 172.02 |
| 100000 | 0.82 | 0.2  | 0.8  | 3280 | 32000 | 64000 | 88.61  | 0.1982 | 0.2018 | 0.7982 | 0.8018 | 3930 | 31789 | 64281 | 4070 | 32210 | 63720 | 110.19 | 156.09 |
| 100000 | 0.83 | 0.2  | 0.8  | 3320 | 32000 | 64000 | 78.74  | 0.1982 | 0.2018 | 0.7982 | 0.8018 | 3930 | 31789 | 64281 | 4070 | 32210 | 63720 | 97.36  | 140.95 |
| 100000 | 0.84 | 0.2  | 0.8  | 3360 | 32000 | 64000 | 69.49  | 0.1982 | 0.2018 | 0.7982 | 0.8018 | 3930 | 31789 | 64281 | 4070 | 32210 | 63720 | 85.35  | 126.59 |
| 100000 | 0.85 | 0.2  | 0.8  | 3400 | 32000 | 64000 | 60.85  | 0.1982 | 0.2018 | 0.7982 | 0.8018 | 3930 | 31789 | 64281 | 4070 | 32210 | 63720 | 74.15  | 113.02 |
| 100000 | 0.86 | 0.2  | 0.8  | 3440 | 32000 | 64000 | 52.81  | 0.1982 | 0.2018 | 0.7982 | 0.8018 | 3930 | 31789 | 64281 | 4070 | 32210 | 63720 | 63.76  | 100.24 |
| 100000 | 0.87 | 0.2  | 0.8  | 3480 | 32000 | 64000 | 45.37  | 0.1982 | 0.2018 | 0.7982 | 0.8018 | 3930 | 31789 | 64281 | 4070 | 32210 | 63720 | 54.19  | 88.24  |
| 100000 | 0.88 | 0.2  | 0.8  | 3520 | 32000 | 64000 | 38.51  | 0.1982 | 0.2018 | 0.7982 | 0.8018 | 3930 | 31789 | 64281 | 4070 | 32210 | 63720 | 45.44  | 77.03  |
| 100000 | 0.89 | 0.2  | 0.8  | 3560 | 32000 | 64000 | 32.24  | 0.1982 | 0.2018 | 0.7982 | 0.8018 | 3930 | 31789 | 64281 | 4070 | 32210 | 63720 | 37.49  | 66.61  |
| 100000 | 0.90 | 0.2  | 0.8  | 3600 | 32000 | 64000 | 26.55  | 0.1982 | 0.2018 | 0.7982 | 0.8018 | 3930 | 31789 | 64281 | 4070 | 32210 | 63720 | 30.37  | 56.97  |
| 100000 | 0.91 | 0.2  | 0.8  | 3640 | 32000 | 64000 | 21.43  | 0.1982 | 0.2018 | 0.7982 | 0.8018 | 3930 | 31789 | 64281 | 4070 | 32210 | 63720 | 24.05  | 48.11  |
| 100000 | 0.92 | 0.2  | 0.8  | 3680 | 32000 | 64000 | 16.87  | 0.1982 | 0.2018 | 0.7982 | 0.8018 | 3930 | 31789 | 64281 | 4070 | 32210 | 63720 | 18.55  | 40.05  |
| 100000 | 0.93 | 0.2  | 0.8  | 3720 | 32000 | 64000 | 12.87  | 0.1982 | 0.2018 | 0.7982 | 0.8018 | 3930 | 31789 | 64281 | 4070 | 32210 | 63720 | 13.87  | 32.77  |
| 100000 | 0.94 | 0.2  | 0.8  | 3760 | 32000 | 64000 | 9.42   | 0.1982 | 0.2018 | 0.7982 | 0.8018 | 3930 | 31789 | 64281 | 4070 | 32210 | 63720 | 10.00  | 26.27  |
| 100000 | 0.95 | 0.2  | 0.8  | 3800 | 32000 | 64000 | 6.52   | 0.1982 | 0.2018 | 0.7982 | 0.8018 | 3930 | 31789 | 64281 | 4070 | 32210 | 63720 | 6.94   | 20.56  |
| 100000 | 0.96 | 0.2  | 0.8  | 3840 | 32000 | 64000 | 4.16   | 0.1982 | 0.2018 | 0.7982 | 0.8018 | 3930 | 31789 | 64281 | 4070 | 32210 | 63720 | 4.70   | 15.64  |
| 100000 | 0.97 | 0.2  | 0.8  | 3880 | 32000 | 64000 | 2.33   | 0.1982 | 0.2018 | 0.7982 | 0.8018 | 3930 | 31789 | 64281 | 4070 | 32210 | 63720 | 3.27   | 11.51  |
| 100000 | 0.98 | 0.2  | 0.8  | 3920 | 32000 | 64000 | 1.03   | 0.1982 | 0.2018 | 0.7982 | 0.8018 | 3930 | 31789 | 64281 | 4070 | 32210 | 63720 | 2.65   | 8.16   |

|        |      |      |      |      |       |       |        |        |        |        |        |      |       |       |      |       |       |        |        |
|--------|------|------|------|------|-------|-------|--------|--------|--------|--------|--------|------|-------|-------|------|-------|-------|--------|--------|
| 100000 | 0.99 | 0.2  | 0.8  | 3960 | 32000 | 64000 | 0.26   | 0.1982 | 0.2018 | 0.7982 | 0.8018 | 3930 | 31789 | 64281 | 4070 | 32210 | 63720 | 2.85   | 5.59   |
| 100000 | 1.00 | 0.2  | 0.8  | 4000 | 32000 | 64000 | 0.00   | 0.1982 | 0.2018 | 0.7982 | 0.8018 | 3930 | 31789 | 64281 | 4070 | 32210 | 63720 | 3.87   | 3.82   |
| 100000 | 1.01 | 0.2  | 0.8  | 4040 | 32000 | 64000 | 0.26   | 0.1982 | 0.2018 | 0.7982 | 0.8018 | 3930 | 31789 | 64281 | 4070 | 32210 | 63720 | 5.70   | 2.83   |
| 100000 | 1.02 | 0.2  | 0.8  | 4080 | 32000 | 64000 | 1.02   | 0.1982 | 0.2018 | 0.7982 | 0.8018 | 3930 | 31789 | 64281 | 4070 | 32210 | 63720 | 8.34   | 2.62   |
| 100000 | 1.03 | 0.2  | 0.8  | 4120 | 32000 | 64000 | 2.28   | 0.1982 | 0.2018 | 0.7982 | 0.8018 | 3930 | 31789 | 64281 | 4070 | 32210 | 63720 | 11.79  | 3.20   |
| 100000 | 1.04 | 0.2  | 0.8  | 4160 | 32000 | 64000 | 4.04   | 0.1982 | 0.2018 | 0.7982 | 0.8018 | 3930 | 31789 | 64281 | 4070 | 32210 | 63720 | 16.07  | 4.57   |
| 100000 | 1.05 | 0.2  | 0.8  | 4200 | 32000 | 64000 | 6.29   | 0.1982 | 0.2018 | 0.7982 | 0.8018 | 3930 | 31789 | 64281 | 4070 | 32210 | 63720 | 21.15  | 6.72   |
| 100000 | 1.06 | 0.2  | 0.8  | 4240 | 32000 | 64000 | 9.02   | 0.1982 | 0.2018 | 0.7982 | 0.8018 | 3930 | 31789 | 64281 | 4070 | 32210 | 63720 | 27.05  | 9.66   |
| 100000 | 1.07 | 0.2  | 0.8  | 4280 | 32000 | 64000 | 12.23  | 0.1982 | 0.2018 | 0.7982 | 0.8018 | 3930 | 31789 | 64281 | 4070 | 32210 | 63720 | 33.76  | 13.39  |
| 100000 | 1.08 | 0.2  | 0.8  | 4320 | 32000 | 64000 | 15.92  | 0.1982 | 0.2018 | 0.7982 | 0.8018 | 3930 | 31789 | 64281 | 4070 | 32210 | 63720 | 41.29  | 17.90  |
| 100000 | 1.09 | 0.2  | 0.8  | 4360 | 32000 | 64000 | 20.08  | 0.1982 | 0.2018 | 0.7982 | 0.8018 | 3930 | 31789 | 64281 | 4070 | 32210 | 63720 | 49.63  | 23.20  |
| 100000 | 1.10 | 0.2  | 0.8  | 4400 | 32000 | 64000 | 24.70  | 0.1982 | 0.2018 | 0.7982 | 0.8018 | 3930 | 31789 | 64281 | 4070 | 32210 | 63720 | 58.79  | 29.28  |
| 100000 | 1.11 | 0.2  | 0.8  | 4440 | 32000 | 64000 | 29.79  | 0.1982 | 0.2018 | 0.7982 | 0.8018 | 3930 | 31789 | 64281 | 4070 | 32210 | 63720 | 68.76  | 36.15  |
| 100000 | 1.12 | 0.2  | 0.8  | 4480 | 32000 | 64000 | 35.33  | 0.1982 | 0.2018 | 0.7982 | 0.8018 | 3930 | 31789 | 64281 | 4070 | 32210 | 63720 | 79.54  | 43.81  |
| 100000 | 1.13 | 0.2  | 0.8  | 4520 | 32000 | 64000 | 41.31  | 0.1982 | 0.2018 | 0.7982 | 0.8018 | 3930 | 31789 | 64281 | 4070 | 32210 | 63720 | 91.14  | 52.25  |
| 100000 | 1.14 | 0.2  | 0.8  | 4560 | 32000 | 64000 | 47.75  | 0.1982 | 0.2018 | 0.7982 | 0.8018 | 3930 | 31789 | 64281 | 4070 | 32210 | 63720 | 103.56 | 61.48  |
| 100000 | 1.15 | 0.2  | 0.8  | 4600 | 32000 | 64000 | 54.62  | 0.1982 | 0.2018 | 0.7982 | 0.8018 | 3930 | 31789 | 64281 | 4070 | 32210 | 63720 | 116.78 | 71.50  |
| 100000 | 1.16 | 0.2  | 0.8  | 4640 | 32000 | 64000 | 61.93  | 0.1982 | 0.2018 | 0.7982 | 0.8018 | 3930 | 31789 | 64281 | 4070 | 32210 | 63720 | 130.82 | 82.30  |
| 100000 | 1.17 | 0.2  | 0.8  | 4680 | 32000 | 64000 | 69.67  | 0.1982 | 0.2018 | 0.7982 | 0.8018 | 3930 | 31789 | 64281 | 4070 | 32210 | 63720 | 145.68 | 93.88  |
| 100000 | 1.18 | 0.2  | 0.8  | 4720 | 32000 | 64000 | 77.84  | 0.1982 | 0.2018 | 0.7982 | 0.8018 | 3930 | 31789 | 64281 | 4070 | 32210 | 63720 | 161.35 | 106.26 |
| 100000 | 1.19 | 0.2  | 0.8  | 4760 | 32000 | 64000 | 86.43  | 0.1982 | 0.2018 | 0.7982 | 0.8018 | 3930 | 31789 | 64281 | 4070 | 32210 | 63720 | 177.83 | 119.42 |
| 100000 | 1.20 | 0.2  | 0.8  | 4800 | 32000 | 64000 | 95.43  | 0.1982 | 0.2018 | 0.7982 | 0.8018 | 3930 | 31789 | 64281 | 4070 | 32210 | 63720 | 195.13 | 133.36 |
| 100000 | 0.80 | 0.25 | 0.75 | 5000 | 37500 | 56250 | 153.87 | 0.2481 | 0.2519 | 0.7481 | 0.7519 | 6155 | 37310 | 56535 | 6345 | 37689 | 55966 | 219.31 | 287.60 |
| 100000 | 0.81 | 0.25 | 0.75 | 5063 | 37500 | 56250 | 138.23 | 0.2481 | 0.2519 | 0.7481 | 0.7519 | 6155 | 37310 | 56535 | 6345 | 37689 | 55966 | 196.48 | 261.71 |
| 100000 | 0.82 | 0.25 | 0.75 | 5125 | 37500 | 56250 | 123.49 | 0.2481 | 0.2519 | 0.7481 | 0.7519 | 6155 | 37310 | 56535 | 6345 | 37689 | 55966 | 174.92 | 237.06 |
| 100000 | 0.83 | 0.25 | 0.75 | 5188 | 37500 | 56250 | 109.64 | 0.2481 | 0.2519 | 0.7481 | 0.7519 | 6155 | 37310 | 56535 | 6345 | 37689 | 55966 | 154.63 | 213.63 |
| 100000 | 0.84 | 0.25 | 0.75 | 5250 | 37500 | 56250 | 96.68  | 0.2481 | 0.2519 | 0.7481 | 0.7519 | 6155 | 37310 | 56535 | 6345 | 37689 | 55966 | 135.60 | 191.44 |
| 100000 | 0.85 | 0.25 | 0.75 | 5313 | 37500 | 56250 | 84.58  | 0.2481 | 0.2519 | 0.7481 | 0.7519 | 6155 | 37310 | 56535 | 6345 | 37689 | 55966 | 117.85 | 170.48 |
| 100000 | 0.86 | 0.25 | 0.75 | 5375 | 37500 | 56250 | 73.35  | 0.2481 | 0.2519 | 0.7481 | 0.7519 | 6155 | 37310 | 56535 | 6345 | 37689 | 55966 | 101.37 | 150.75 |
| 100000 | 0.87 | 0.25 | 0.75 | 5438 | 37500 | 56250 | 62.96  | 0.2481 | 0.2519 | 0.7481 | 0.7519 | 6155 | 37310 | 56535 | 6345 | 37689 | 55966 | 86.15  | 132.25 |
| 100000 | 0.88 | 0.25 | 0.75 | 5500 | 37500 | 56250 | 53.40  | 0.2481 | 0.2519 | 0.7481 | 0.7519 | 6155 | 37310 | 56535 | 6345 | 37689 | 55966 | 72.21  | 114.99 |
| 100000 | 0.89 | 0.25 | 0.75 | 5563 | 37500 | 56250 | 44.67  | 0.2481 | 0.2519 | 0.7481 | 0.7519 | 6155 | 37310 | 56535 | 6345 | 37689 | 55966 | 59.53  | 98.95  |
| 100000 | 0.90 | 0.25 | 0.75 | 5625 | 37500 | 56250 | 36.75  | 0.2481 | 0.2519 | 0.7481 | 0.7519 | 6155 | 37310 | 56535 | 6345 | 37689 | 55966 | 48.13  | 84.15  |
| 100000 | 0.91 | 0.25 | 0.75 | 5688 | 37500 | 56250 | 29.63  | 0.2481 | 0.2519 | 0.7481 | 0.7519 | 6155 | 37310 | 56535 | 6345 | 37689 | 55966 | 37.99  | 70.57  |
| 100000 | 0.92 | 0.25 | 0.75 | 5750 | 37500 | 56250 | 23.31  | 0.2481 | 0.2519 | 0.7481 | 0.7519 | 6155 | 37310 | 56535 | 6345 | 37689 | 55966 | 29.12  | 58.23  |

|        |      |      |      |      |       |       |        |        |        |        |        |      |       |       |      |       |       |        |        |
|--------|------|------|------|------|-------|-------|--------|--------|--------|--------|--------|------|-------|-------|------|-------|-------|--------|--------|
| 100000 | 0.93 | 0.25 | 0.75 | 5813 | 37500 | 56250 | 17.77  | 0.2481 | 0.2519 | 0.7481 | 0.7519 | 6155 | 37310 | 56535 | 6345 | 37689 | 55966 | 21.52  | 47.12  |
| 100000 | 0.94 | 0.25 | 0.75 | 5875 | 37500 | 56250 | 13.00  | 0.2481 | 0.2519 | 0.7481 | 0.7519 | 6155 | 37310 | 56535 | 6345 | 37689 | 55966 | 15.19  | 37.24  |
| 100000 | 0.95 | 0.25 | 0.75 | 5938 | 37500 | 56250 | 8.98   | 0.2481 | 0.2519 | 0.7481 | 0.7519 | 6155 | 37310 | 56535 | 6345 | 37689 | 55966 | 10.13  | 28.59  |
| 100000 | 0.96 | 0.25 | 0.75 | 6000 | 37500 | 56250 | 5.72   | 0.2481 | 0.2519 | 0.7481 | 0.7519 | 6155 | 37310 | 56535 | 6345 | 37689 | 55966 | 6.34   | 21.18  |
| 100000 | 0.97 | 0.25 | 0.75 | 6063 | 37500 | 56250 | 3.21   | 0.2481 | 0.2519 | 0.7481 | 0.7519 | 6155 | 37310 | 56535 | 6345 | 37689 | 55966 | 3.81   | 14.99  |
| 100000 | 0.98 | 0.25 | 0.75 | 6125 | 37500 | 56250 | 1.42   | 0.2481 | 0.2519 | 0.7481 | 0.7519 | 6155 | 37310 | 56535 | 6345 | 37689 | 55966 | 2.56   | 10.04  |
| 100000 | 0.99 | 0.25 | 0.75 | 6188 | 37500 | 56250 | 0.35   | 0.2481 | 0.2519 | 0.7481 | 0.7519 | 6155 | 37310 | 56535 | 6345 | 37689 | 55966 | 2.58   | 6.31   |
| 100000 | 1.00 | 0.25 | 0.75 | 6250 | 37500 | 56250 | 0.00   | 0.2481 | 0.2519 | 0.7481 | 0.7519 | 6155 | 37310 | 56535 | 6345 | 37689 | 55966 | 3.86   | 3.82   |
| 100000 | 1.01 | 0.25 | 0.75 | 6313 | 37500 | 56250 | 0.35   | 0.2481 | 0.2519 | 0.7481 | 0.7519 | 6155 | 37310 | 56535 | 6345 | 37689 | 55966 | 6.42   | 2.56   |
| 100000 | 1.02 | 0.25 | 0.75 | 6375 | 37500 | 56250 | 1.39   | 0.2481 | 0.2519 | 0.7481 | 0.7519 | 6155 | 37310 | 56535 | 6345 | 37689 | 55966 | 10.24  | 2.53   |
| 100000 | 1.03 | 0.25 | 0.75 | 6438 | 37500 | 56250 | 3.12   | 0.2481 | 0.2519 | 0.7481 | 0.7519 | 6155 | 37310 | 56535 | 6345 | 37689 | 55966 | 15.33  | 3.73   |
| 100000 | 1.04 | 0.25 | 0.75 | 6500 | 37500 | 56250 | 5.53   | 0.2481 | 0.2519 | 0.7481 | 0.7519 | 6155 | 37310 | 56535 | 6345 | 37689 | 55966 | 21.69  | 6.17   |
| 100000 | 1.05 | 0.25 | 0.75 | 6563 | 37500 | 56250 | 8.60   | 0.2481 | 0.2519 | 0.7481 | 0.7519 | 6155 | 37310 | 56535 | 6345 | 37689 | 55966 | 29.32  | 9.83   |
| 100000 | 1.06 | 0.25 | 0.75 | 6625 | 37500 | 56250 | 12.33  | 0.2481 | 0.2519 | 0.7481 | 0.7519 | 6155 | 37310 | 56535 | 6345 | 37689 | 55966 | 38.22  | 14.73  |
| 100000 | 1.07 | 0.25 | 0.75 | 6688 | 37500 | 56250 | 16.71  | 0.2481 | 0.2519 | 0.7481 | 0.7519 | 6155 | 37310 | 56535 | 6345 | 37689 | 55966 | 48.39  | 20.85  |
| 100000 | 1.08 | 0.25 | 0.75 | 6750 | 37500 | 56250 | 21.73  | 0.2481 | 0.2519 | 0.7481 | 0.7519 | 6155 | 37310 | 56535 | 6345 | 37689 | 55966 | 59.83  | 28.21  |
| 100000 | 1.09 | 0.25 | 0.75 | 6813 | 37500 | 56250 | 27.39  | 0.2481 | 0.2519 | 0.7481 | 0.7519 | 6155 | 37310 | 56535 | 6345 | 37689 | 55966 | 72.54  | 36.80  |
| 100000 | 1.10 | 0.25 | 0.75 | 6875 | 37500 | 56250 | 33.67  | 0.2481 | 0.2519 | 0.7481 | 0.7519 | 6155 | 37310 | 56535 | 6345 | 37689 | 55966 | 86.52  | 46.62  |
| 100000 | 1.11 | 0.25 | 0.75 | 6938 | 37500 | 56250 | 40.57  | 0.2481 | 0.2519 | 0.7481 | 0.7519 | 6155 | 37310 | 56535 | 6345 | 37689 | 55966 | 101.76 | 57.67  |
| 100000 | 1.12 | 0.25 | 0.75 | 7000 | 37500 | 56250 | 48.08  | 0.2481 | 0.2519 | 0.7481 | 0.7519 | 6155 | 37310 | 56535 | 6345 | 37689 | 55966 | 118.28 | 69.95  |
| 100000 | 1.13 | 0.25 | 0.75 | 7063 | 37500 | 56250 | 56.19  | 0.2481 | 0.2519 | 0.7481 | 0.7519 | 6155 | 37310 | 56535 | 6345 | 37689 | 55966 | 136.06 | 83.47  |
| 100000 | 1.14 | 0.25 | 0.75 | 7125 | 37500 | 56250 | 64.89  | 0.2481 | 0.2519 | 0.7481 | 0.7519 | 6155 | 37310 | 56535 | 6345 | 37689 | 55966 | 155.12 | 98.21  |
| 100000 | 1.15 | 0.25 | 0.75 | 7188 | 37500 | 56250 | 74.18  | 0.2481 | 0.2519 | 0.7481 | 0.7519 | 6155 | 37310 | 56535 | 6345 | 37689 | 55966 | 175.44 | 114.19 |
| 100000 | 1.16 | 0.25 | 0.75 | 7250 | 37500 | 56250 | 84.04  | 0.2481 | 0.2519 | 0.7481 | 0.7519 | 6155 | 37310 | 56535 | 6345 | 37689 | 55966 | 197.03 | 131.40 |
| 100000 | 1.17 | 0.25 | 0.75 | 7313 | 37500 | 56250 | 94.48  | 0.2481 | 0.2519 | 0.7481 | 0.7519 | 6155 | 37310 | 56535 | 6345 | 37689 | 55966 | 219.89 | 149.84 |
| 100000 | 1.18 | 0.25 | 0.75 | 7375 | 37500 | 56250 | 105.48 | 0.2481 | 0.2519 | 0.7481 | 0.7519 | 6155 | 37310 | 56535 | 6345 | 37689 | 55966 | 244.02 | 169.51 |
| 100000 | 1.19 | 0.25 | 0.75 | 7438 | 37500 | 56250 | 117.04 | 0.2481 | 0.2519 | 0.7481 | 0.7519 | 6155 | 37310 | 56535 | 6345 | 37689 | 55966 | 269.42 | 190.41 |
| 100000 | 1.20 | 0.25 | 0.75 | 7500 | 37500 | 56250 | 129.15 | 0.2481 | 0.2519 | 0.7481 | 0.7519 | 6155 | 37310 | 56535 | 6345 | 37689 | 55966 | 296.09 | 212.54 |
| 100000 | 0.80 | 0.3  | 0.7  | 7200 | 42000 | 49000 | 196.04 | 0.2980 | 0.3020 | 0.6980 | 0.7020 | 8880 | 41839 | 49282 | 9121 | 42160 | 48719 | 320.04 | 406.78 |
| 100000 | 0.81 | 0.3  | 0.7  | 7290 | 42000 | 49000 | 175.97 | 0.2980 | 0.3020 | 0.6980 | 0.7020 | 8880 | 41839 | 49282 | 9121 | 42160 | 48719 | 286.90 | 369.76 |
| 100000 | 0.82 | 0.3  | 0.7  | 7380 | 42000 | 49000 | 157.08 | 0.2980 | 0.3020 | 0.6980 | 0.7020 | 8880 | 41839 | 49282 | 9121 | 42160 | 48719 | 255.58 | 334.51 |
| 100000 | 0.83 | 0.3  | 0.7  | 7470 | 42000 | 49000 | 139.35 | 0.2980 | 0.3020 | 0.6980 | 0.7020 | 8880 | 41839 | 49282 | 9121 | 42160 | 48719 | 226.09 | 301.04 |
| 100000 | 0.84 | 0.3  | 0.7  | 7560 | 42000 | 49000 | 122.77 | 0.2980 | 0.3020 | 0.6980 | 0.7020 | 8880 | 41839 | 49282 | 9121 | 42160 | 48719 | 198.42 | 269.35 |
| 100000 | 0.85 | 0.3  | 0.7  | 7650 | 42000 | 49000 | 107.33 | 0.2980 | 0.3020 | 0.6980 | 0.7020 | 8880 | 41839 | 49282 | 9121 | 42160 | 48719 | 172.58 | 239.43 |
| 100000 | 0.86 | 0.3  | 0.7  | 7740 | 42000 | 49000 | 92.99  | 0.2980 | 0.3020 | 0.6980 | 0.7020 | 8880 | 41839 | 49282 | 9121 | 42160 | 48719 | 148.56 | 211.29 |

|        |      |      |      |       |       |       |        |        |        |        |        |       |       |       |       |       |       |        |        |
|--------|------|------|------|-------|-------|-------|--------|--------|--------|--------|--------|-------|-------|-------|-------|-------|-------|--------|--------|
| 100000 | 0.87 | 0.3  | 0.7  | 7830  | 42000 | 49000 | 79.76  | 0.2980 | 0.3020 | 0.6980 | 0.7020 | 8880  | 41839 | 49282 | 9121  | 42160 | 48719 | 126.37 | 184.93 |
| 100000 | 0.88 | 0.3  | 0.7  | 7920  | 42000 | 49000 | 67.60  | 0.2980 | 0.3020 | 0.6980 | 0.7020 | 8880  | 41839 | 49282 | 9121  | 42160 | 48719 | 106.00 | 160.34 |
| 100000 | 0.89 | 0.3  | 0.7  | 8010  | 42000 | 49000 | 56.50  | 0.2980 | 0.3020 | 0.6980 | 0.7020 | 8880  | 41839 | 49282 | 9121  | 42160 | 48719 | 87.45  | 137.53 |
| 100000 | 0.90 | 0.3  | 0.7  | 8100  | 42000 | 49000 | 46.45  | 0.2980 | 0.3020 | 0.6980 | 0.7020 | 8880  | 41839 | 49282 | 9121  | 42160 | 48719 | 70.73  | 116.49 |
| 100000 | 0.91 | 0.3  | 0.7  | 8190  | 42000 | 49000 | 37.43  | 0.2980 | 0.3020 | 0.6980 | 0.7020 | 8880  | 41839 | 49282 | 9121  | 42160 | 48719 | 55.83  | 97.24  |
| 100000 | 0.92 | 0.3  | 0.7  | 8280  | 42000 | 49000 | 29.42  | 0.2980 | 0.3020 | 0.6980 | 0.7020 | 8880  | 41839 | 49282 | 9121  | 42160 | 48719 | 42.76  | 79.75  |
| 100000 | 0.93 | 0.3  | 0.7  | 8370  | 42000 | 49000 | 22.40  | 0.2980 | 0.3020 | 0.6980 | 0.7020 | 8880  | 41839 | 49282 | 9121  | 42160 | 48719 | 31.51  | 64.05  |
| 100000 | 0.94 | 0.3  | 0.7  | 8460  | 42000 | 49000 | 16.37  | 0.2980 | 0.3020 | 0.6980 | 0.7020 | 8880  | 41839 | 49282 | 9121  | 42160 | 48719 | 22.09  | 50.11  |
| 100000 | 0.95 | 0.3  | 0.7  | 8550  | 42000 | 49000 | 11.31  | 0.2980 | 0.3020 | 0.6980 | 0.7020 | 8880  | 41839 | 49282 | 9121  | 42160 | 48719 | 14.49  | 37.96  |
| 100000 | 0.96 | 0.3  | 0.7  | 8640  | 42000 | 49000 | 7.20   | 0.2980 | 0.3020 | 0.6980 | 0.7020 | 8880  | 41839 | 49282 | 9121  | 42160 | 48719 | 8.71   | 27.58  |
| 100000 | 0.97 | 0.3  | 0.7  | 8730  | 42000 | 49000 | 4.03   | 0.2980 | 0.3020 | 0.6980 | 0.7020 | 8880  | 41839 | 49282 | 9121  | 42160 | 48719 | 4.76   | 18.98  |
| 100000 | 0.98 | 0.3  | 0.7  | 8820  | 42000 | 49000 | 1.78   | 0.2980 | 0.3020 | 0.6980 | 0.7020 | 8880  | 41839 | 49282 | 9121  | 42160 | 48719 | 2.64   | 12.15  |
| 100000 | 0.99 | 0.3  | 0.7  | 8910  | 42000 | 49000 | 0.44   | 0.2980 | 0.3020 | 0.6980 | 0.7020 | 8880  | 41839 | 49282 | 9121  | 42160 | 48719 | 2.33   | 7.10   |
| 100000 | 1.00 | 0.3  | 0.7  | 9000  | 42000 | 49000 | 0.00   | 0.2980 | 0.3020 | 0.6980 | 0.7020 | 8880  | 41839 | 49282 | 9121  | 42160 | 48719 | 3.86   | 3.83   |
| 100000 | 1.01 | 0.3  | 0.7  | 9090  | 42000 | 49000 | 0.44   | 0.2980 | 0.3020 | 0.6980 | 0.7020 | 8880  | 41839 | 49282 | 9121  | 42160 | 48719 | 7.20   | 2.33   |
| 100000 | 1.02 | 0.3  | 0.7  | 9180  | 42000 | 49000 | 1.75   | 0.2980 | 0.3020 | 0.6980 | 0.7020 | 8880  | 41839 | 49282 | 9121  | 42160 | 48719 | 12.37  | 2.61   |
| 100000 | 1.03 | 0.3  | 0.7  | 9270  | 42000 | 49000 | 3.91   | 0.2980 | 0.3020 | 0.6980 | 0.7020 | 8880  | 41839 | 49282 | 9121  | 42160 | 48719 | 19.37  | 4.66   |
| 100000 | 1.04 | 0.3  | 0.7  | 9360  | 42000 | 49000 | 6.91   | 0.2980 | 0.3020 | 0.6980 | 0.7020 | 8880  | 41839 | 49282 | 9121  | 42160 | 48719 | 28.19  | 8.49   |
| 100000 | 1.05 | 0.3  | 0.7  | 9450  | 42000 | 49000 | 10.75  | 0.2980 | 0.3020 | 0.6980 | 0.7020 | 8880  | 41839 | 49282 | 9121  | 42160 | 48719 | 38.83  | 14.10  |
| 100000 | 1.06 | 0.3  | 0.7  | 9540  | 42000 | 49000 | 15.40  | 0.2980 | 0.3020 | 0.6980 | 0.7020 | 8880  | 41839 | 49282 | 9121  | 42160 | 48719 | 51.30  | 21.48  |
| 100000 | 1.07 | 0.3  | 0.7  | 9630  | 42000 | 49000 | 20.86  | 0.2980 | 0.3020 | 0.6980 | 0.7020 | 8880  | 41839 | 49282 | 9121  | 42160 | 48719 | 65.59  | 30.64  |
| 100000 | 1.08 | 0.3  | 0.7  | 9720  | 42000 | 49000 | 27.11  | 0.2980 | 0.3020 | 0.6980 | 0.7020 | 8880  | 41839 | 49282 | 9121  | 42160 | 48719 | 81.71  | 41.57  |
| 100000 | 1.09 | 0.3  | 0.7  | 9810  | 42000 | 49000 | 34.14  | 0.2980 | 0.3020 | 0.6980 | 0.7020 | 8880  | 41839 | 49282 | 9121  | 42160 | 48719 | 99.65  | 54.29  |
| 100000 | 1.10 | 0.3  | 0.7  | 9900  | 42000 | 49000 | 41.94  | 0.2980 | 0.3020 | 0.6980 | 0.7020 | 8880  | 41839 | 49282 | 9121  | 42160 | 48719 | 119.42 | 68.77  |
| 100000 | 1.11 | 0.3  | 0.7  | 9990  | 42000 | 49000 | 50.50  | 0.2980 | 0.3020 | 0.6980 | 0.7020 | 8880  | 41839 | 49282 | 9121  | 42160 | 48719 | 141.01 | 85.04  |
| 100000 | 1.12 | 0.3  | 0.7  | 10080 | 42000 | 49000 | 59.81  | 0.2980 | 0.3020 | 0.6980 | 0.7020 | 8880  | 41839 | 49282 | 9121  | 42160 | 48719 | 164.42 | 103.08 |
| 100000 | 1.13 | 0.3  | 0.7  | 10170 | 42000 | 49000 | 69.85  | 0.2980 | 0.3020 | 0.6980 | 0.7020 | 8880  | 41839 | 49282 | 9121  | 42160 | 48719 | 189.66 | 122.89 |
| 100000 | 1.14 | 0.3  | 0.7  | 10260 | 42000 | 49000 | 80.61  | 0.2980 | 0.3020 | 0.6980 | 0.7020 | 8880  | 41839 | 49282 | 9121  | 42160 | 48719 | 216.73 | 144.48 |
| 100000 | 1.15 | 0.3  | 0.7  | 10350 | 42000 | 49000 | 92.09  | 0.2980 | 0.3020 | 0.6980 | 0.7020 | 8880  | 41839 | 49282 | 9121  | 42160 | 48719 | 245.61 | 167.85 |
| 100000 | 1.16 | 0.3  | 0.7  | 10440 | 42000 | 49000 | 104.27 | 0.2980 | 0.3020 | 0.6980 | 0.7020 | 8880  | 41839 | 49282 | 9121  | 42160 | 48719 | 276.32 | 193.00 |
| 100000 | 1.17 | 0.3  | 0.7  | 10530 | 42000 | 49000 | 117.15 | 0.2980 | 0.3020 | 0.6980 | 0.7020 | 8880  | 41839 | 49282 | 9121  | 42160 | 48719 | 308.86 | 219.92 |
| 100000 | 1.18 | 0.3  | 0.7  | 10620 | 42000 | 49000 | 130.70 | 0.2980 | 0.3020 | 0.6980 | 0.7020 | 8880  | 41839 | 49282 | 9121  | 42160 | 48719 | 343.22 | 248.61 |
| 100000 | 1.19 | 0.3  | 0.7  | 10710 | 42000 | 49000 | 144.93 | 0.2980 | 0.3020 | 0.6980 | 0.7020 | 8880  | 41839 | 49282 | 9121  | 42160 | 48719 | 379.41 | 279.08 |
| 100000 | 1.20 | 0.3  | 0.7  | 10800 | 42000 | 49000 | 159.82 | 0.2980 | 0.3020 | 0.6980 | 0.7020 | 8880  | 41839 | 49282 | 9121  | 42160 | 48719 | 417.42 | 311.33 |
| 100000 | 0.80 | 0.35 | 0.65 | 9800  | 45500 | 42250 | 233.50 | 0.3479 | 0.3521 | 0.6479 | 0.6521 | 12104 | 45374 | 42522 | 12397 | 45625 | 41979 | 440.70 | 546.04 |

|        |      |      |      |       |       |       |        |        |        |        |        |       |       |       |       |       |       |        |        |
|--------|------|------|------|-------|-------|-------|--------|--------|--------|--------|--------|-------|-------|-------|-------|-------|-------|--------|--------|
| 100000 | 0.81 | 0.35 | 0.65 | 9923  | 45500 | 42250 | 209.42 | 0.3479 | 0.3521 | 0.6479 | 0.6521 | 12104 | 45374 | 42522 | 12397 | 45625 | 41979 | 395.30 | 495.93 |
| 100000 | 0.82 | 0.35 | 0.65 | 10045 | 45500 | 42250 | 186.79 | 0.3479 | 0.3521 | 0.6479 | 0.6521 | 12104 | 45374 | 42522 | 12397 | 45625 | 41979 | 352.38 | 448.24 |
| 100000 | 0.83 | 0.35 | 0.65 | 10168 | 45500 | 42250 | 165.58 | 0.3479 | 0.3521 | 0.6479 | 0.6521 | 12104 | 45374 | 42522 | 12397 | 45625 | 41979 | 311.94 | 402.97 |
| 100000 | 0.84 | 0.35 | 0.65 | 10290 | 45500 | 42250 | 145.77 | 0.3479 | 0.3521 | 0.6479 | 0.6521 | 12104 | 45374 | 42522 | 12397 | 45625 | 41979 | 273.98 | 360.13 |
| 100000 | 0.85 | 0.35 | 0.65 | 10413 | 45500 | 42250 | 127.33 | 0.3479 | 0.3521 | 0.6479 | 0.6521 | 12104 | 45374 | 42522 | 12397 | 45625 | 41979 | 238.50 | 319.70 |
| 100000 | 0.86 | 0.35 | 0.65 | 10535 | 45500 | 42250 | 110.24 | 0.3479 | 0.3521 | 0.6479 | 0.6521 | 12104 | 45374 | 42522 | 12397 | 45625 | 41979 | 205.50 | 281.70 |
| 100000 | 0.87 | 0.35 | 0.65 | 10658 | 45500 | 42250 | 94.48  | 0.3479 | 0.3521 | 0.6479 | 0.6521 | 12104 | 45374 | 42522 | 12397 | 45625 | 41979 | 174.98 | 246.11 |
| 100000 | 0.88 | 0.35 | 0.65 | 10780 | 45500 | 42250 | 80.01  | 0.3479 | 0.3521 | 0.6479 | 0.6521 | 12104 | 45374 | 42522 | 12397 | 45625 | 41979 | 146.94 | 212.95 |
| 100000 | 0.89 | 0.35 | 0.65 | 10903 | 45500 | 42250 | 66.83  | 0.3479 | 0.3521 | 0.6479 | 0.6521 | 12104 | 45374 | 42522 | 12397 | 45625 | 41979 | 121.38 | 182.21 |
| 100000 | 0.90 | 0.35 | 0.65 | 11025 | 45500 | 42250 | 54.90  | 0.3479 | 0.3521 | 0.6479 | 0.6521 | 12104 | 45374 | 42522 | 12397 | 45625 | 41979 | 98.30  | 153.89 |
| 100000 | 0.91 | 0.35 | 0.65 | 11148 | 45500 | 42250 | 44.20  | 0.3479 | 0.3521 | 0.6479 | 0.6521 | 12104 | 45374 | 42522 | 12397 | 45625 | 41979 | 77.70  | 127.99 |
| 100000 | 0.92 | 0.35 | 0.65 | 11270 | 45500 | 42250 | 34.72  | 0.3479 | 0.3521 | 0.6479 | 0.6521 | 12104 | 45374 | 42522 | 12397 | 45625 | 41979 | 59.57  | 104.51 |
| 100000 | 0.93 | 0.35 | 0.65 | 11393 | 45500 | 42250 | 26.42  | 0.3479 | 0.3521 | 0.6479 | 0.6521 | 12104 | 45374 | 42522 | 12397 | 45625 | 41979 | 43.93  | 83.45  |
| 100000 | 0.94 | 0.35 | 0.65 | 11515 | 45500 | 42250 | 19.30  | 0.3479 | 0.3521 | 0.6479 | 0.6521 | 12104 | 45374 | 42522 | 12397 | 45625 | 41979 | 30.77  | 64.81  |
| 100000 | 0.95 | 0.35 | 0.65 | 11638 | 45500 | 42250 | 13.32  | 0.3479 | 0.3521 | 0.6479 | 0.6521 | 12104 | 45374 | 42522 | 12397 | 45625 | 41979 | 20.08  | 48.60  |
| 100000 | 0.96 | 0.35 | 0.65 | 11760 | 45500 | 42250 | 8.48   | 0.3479 | 0.3521 | 0.6479 | 0.6521 | 12104 | 45374 | 42522 | 12397 | 45625 | 41979 | 11.88  | 34.80  |
| 100000 | 0.97 | 0.35 | 0.65 | 11883 | 45500 | 42250 | 4.74   | 0.3479 | 0.3521 | 0.6479 | 0.6521 | 12104 | 45374 | 42522 | 12397 | 45625 | 41979 | 6.15   | 23.43  |
| 100000 | 0.98 | 0.35 | 0.65 | 12005 | 45500 | 42250 | 2.09   | 0.3479 | 0.3521 | 0.6479 | 0.6521 | 12104 | 45374 | 42522 | 12397 | 45625 | 41979 | 2.91   | 14.47  |
| 100000 | 0.99 | 0.35 | 0.65 | 12128 | 45500 | 42250 | 0.52   | 0.3479 | 0.3521 | 0.6479 | 0.6521 | 12104 | 45374 | 42522 | 12397 | 45625 | 41979 | 2.14   | 7.94   |
| 100000 | 1.00 | 0.35 | 0.65 | 12250 | 45500 | 42250 | 0.00   | 0.3479 | 0.3521 | 0.6479 | 0.6521 | 12104 | 45374 | 42522 | 12397 | 45625 | 41979 | 3.85   | 3.83   |
| 100000 | 1.01 | 0.35 | 0.65 | 12373 | 45500 | 42250 | 0.51   | 0.3479 | 0.3521 | 0.6479 | 0.6521 | 12104 | 45374 | 42522 | 12397 | 45625 | 41979 | 8.05   | 2.14   |
| 100000 | 1.02 | 0.35 | 0.65 | 12495 | 45500 | 42250 | 2.05   | 0.3479 | 0.3521 | 0.6479 | 0.6521 | 12104 | 45374 | 42522 | 12397 | 45625 | 41979 | 14.72  | 2.87   |
| 100000 | 1.03 | 0.35 | 0.65 | 12618 | 45500 | 42250 | 4.58   | 0.3479 | 0.3521 | 0.6479 | 0.6521 | 12104 | 45374 | 42522 | 12397 | 45625 | 41979 | 23.87  | 6.02   |
| 100000 | 1.04 | 0.35 | 0.65 | 12740 | 45500 | 42250 | 8.09   | 0.3479 | 0.3521 | 0.6479 | 0.6521 | 12104 | 45374 | 42522 | 12397 | 45625 | 41979 | 35.50  | 11.60  |
| 100000 | 1.05 | 0.35 | 0.65 | 12863 | 45500 | 42250 | 12.57  | 0.3479 | 0.3521 | 0.6479 | 0.6521 | 12104 | 45374 | 42522 | 12397 | 45625 | 41979 | 49.61  | 19.59  |
| 100000 | 1.06 | 0.35 | 0.65 | 12985 | 45500 | 42250 | 18.01  | 0.3479 | 0.3521 | 0.6479 | 0.6521 | 12104 | 45374 | 42522 | 12397 | 45625 | 41979 | 66.20  | 30.01  |
| 100000 | 1.07 | 0.35 | 0.65 | 13108 | 45500 | 42250 | 24.37  | 0.3479 | 0.3521 | 0.6479 | 0.6521 | 12104 | 45374 | 42522 | 12397 | 45625 | 41979 | 85.27  | 42.84  |
| 100000 | 1.08 | 0.35 | 0.65 | 13230 | 45500 | 42250 | 31.65  | 0.3479 | 0.3521 | 0.6479 | 0.6521 | 12104 | 45374 | 42522 | 12397 | 45625 | 41979 | 106.82 | 58.10  |
| 100000 | 1.09 | 0.35 | 0.65 | 13353 | 45500 | 42250 | 39.84  | 0.3479 | 0.3521 | 0.6479 | 0.6521 | 12104 | 45374 | 42522 | 12397 | 45625 | 41979 | 130.85 | 75.78  |
| 100000 | 1.10 | 0.35 | 0.65 | 13475 | 45500 | 42250 | 48.91  | 0.3479 | 0.3521 | 0.6479 | 0.6521 | 12104 | 45374 | 42522 | 12397 | 45625 | 41979 | 157.36 | 95.88  |
| 100000 | 1.11 | 0.35 | 0.65 | 13598 | 45500 | 42250 | 58.85  | 0.3479 | 0.3521 | 0.6479 | 0.6521 | 12104 | 45374 | 42522 | 12397 | 45625 | 41979 | 186.35 | 118.40 |
| 100000 | 1.12 | 0.35 | 0.65 | 13720 | 45500 | 42250 | 69.65  | 0.3479 | 0.3521 | 0.6479 | 0.6521 | 12104 | 45374 | 42522 | 12397 | 45625 | 41979 | 217.81 | 143.34 |
| 100000 | 1.13 | 0.35 | 0.65 | 13843 | 45500 | 42250 | 81.29  | 0.3479 | 0.3521 | 0.6479 | 0.6521 | 12104 | 45374 | 42522 | 12397 | 45625 | 41979 | 251.76 | 170.70 |
| 100000 | 1.14 | 0.35 | 0.65 | 13965 | 45500 | 42250 | 93.77  | 0.3479 | 0.3521 | 0.6479 | 0.6521 | 12104 | 45374 | 42522 | 12397 | 45625 | 41979 | 288.19 | 200.48 |
| 100000 | 1.15 | 0.35 | 0.65 | 14088 | 45500 | 42250 | 107.06 | 0.3479 | 0.3521 | 0.6479 | 0.6521 | 12104 | 45374 | 42522 | 12397 | 45625 | 41979 | 327.09 | 232.68 |

|        |      |      |      |       |       |       |        |        |        |        |        |       |       |       |       |       |       |        |        |
|--------|------|------|------|-------|-------|-------|--------|--------|--------|--------|--------|-------|-------|-------|-------|-------|-------|--------|--------|
| 100000 | 1.16 | 0.35 | 0.65 | 14210 | 45500 | 42250 | 121.14 | 0.3479 | 0.3521 | 0.6479 | 0.6521 | 12104 | 45374 | 42522 | 12397 | 45625 | 41979 | 368.48 | 267.31 |
| 100000 | 1.17 | 0.35 | 0.65 | 14333 | 45500 | 42250 | 136.02 | 0.3479 | 0.3521 | 0.6479 | 0.6521 | 12104 | 45374 | 42522 | 12397 | 45625 | 41979 | 412.35 | 304.36 |
| 100000 | 1.18 | 0.35 | 0.65 | 14455 | 45500 | 42250 | 151.67 | 0.3479 | 0.3521 | 0.6479 | 0.6521 | 12104 | 45374 | 42522 | 12397 | 45625 | 41979 | 458.69 | 343.82 |
| 100000 | 1.19 | 0.35 | 0.65 | 14578 | 45500 | 42250 | 168.09 | 0.3479 | 0.3521 | 0.6479 | 0.6521 | 12104 | 45374 | 42522 | 12397 | 45625 | 41979 | 507.51 | 385.71 |
| 100000 | 1.20 | 0.35 | 0.65 | 14700 | 45500 | 42250 | 185.25 | 0.3479 | 0.3521 | 0.6479 | 0.6521 | 12104 | 45374 | 42522 | 12397 | 45625 | 41979 | 558.82 | 430.02 |
| 100000 | 0.80 | 0.4  | 0.6  | 12800 | 48000 | 36000 | 263.50 | 0.3979 | 0.4021 | 0.5979 | 0.6021 | 15829 | 47913 | 36258 | 16172 | 48085 | 35743 | 581.51 | 705.18 |
| 100000 | 0.81 | 0.4  | 0.6  | 12960 | 48000 | 36000 | 236.14 | 0.3979 | 0.4021 | 0.5979 | 0.6021 | 15829 | 47913 | 36258 | 16172 | 48085 | 35743 | 521.90 | 640.03 |
| 100000 | 0.82 | 0.4  | 0.6  | 13120 | 48000 | 36000 | 210.47 | 0.3979 | 0.4021 | 0.5979 | 0.6021 | 15829 | 47913 | 36258 | 16172 | 48085 | 35743 | 465.52 | 578.06 |
| 100000 | 0.83 | 0.4  | 0.6  | 13280 | 48000 | 36000 | 186.43 | 0.3979 | 0.4021 | 0.5979 | 0.6021 | 15829 | 47913 | 36258 | 16172 | 48085 | 35743 | 412.38 | 519.24 |
| 100000 | 0.84 | 0.4  | 0.6  | 13440 | 48000 | 36000 | 164.00 | 0.3979 | 0.4021 | 0.5979 | 0.6021 | 15829 | 47913 | 36258 | 16172 | 48085 | 35743 | 362.47 | 463.60 |
| 100000 | 0.85 | 0.4  | 0.6  | 13600 | 48000 | 36000 | 143.15 | 0.3979 | 0.4021 | 0.5979 | 0.6021 | 15829 | 47913 | 36258 | 16172 | 48085 | 35743 | 315.80 | 411.12 |
| 100000 | 0.86 | 0.4  | 0.6  | 13760 | 48000 | 36000 | 123.85 | 0.3979 | 0.4021 | 0.5979 | 0.6021 | 15829 | 47913 | 36258 | 16172 | 48085 | 35743 | 272.36 | 361.81 |
| 100000 | 0.87 | 0.4  | 0.6  | 13920 | 48000 | 36000 | 106.06 | 0.3979 | 0.4021 | 0.5979 | 0.6021 | 15829 | 47913 | 36258 | 16172 | 48085 | 35743 | 232.15 | 315.66 |
| 100000 | 0.88 | 0.4  | 0.6  | 14080 | 48000 | 36000 | 89.76  | 0.3979 | 0.4021 | 0.5979 | 0.6021 | 15829 | 47913 | 36258 | 16172 | 48085 | 35743 | 195.18 | 272.68 |
| 100000 | 0.89 | 0.4  | 0.6  | 14240 | 48000 | 36000 | 74.92  | 0.3979 | 0.4021 | 0.5979 | 0.6021 | 15829 | 47913 | 36258 | 16172 | 48085 | 35743 | 161.45 | 232.86 |
| 100000 | 0.90 | 0.4  | 0.6  | 14400 | 48000 | 36000 | 61.50  | 0.3979 | 0.4021 | 0.5979 | 0.6021 | 15829 | 47913 | 36258 | 16172 | 48085 | 35743 | 130.95 | 196.21 |
| 100000 | 0.91 | 0.4  | 0.6  | 14560 | 48000 | 36000 | 49.48  | 0.3979 | 0.4021 | 0.5979 | 0.6021 | 15829 | 47913 | 36258 | 16172 | 48085 | 35743 | 103.68 | 162.73 |
| 100000 | 0.92 | 0.4  | 0.6  | 14720 | 48000 | 36000 | 38.84  | 0.3979 | 0.4021 | 0.5979 | 0.6021 | 15829 | 47913 | 36258 | 16172 | 48085 | 35743 | 79.65  | 132.41 |
| 100000 | 0.93 | 0.4  | 0.6  | 14880 | 48000 | 36000 | 29.54  | 0.3979 | 0.4021 | 0.5979 | 0.6021 | 15829 | 47913 | 36258 | 16172 | 48085 | 35743 | 58.85  | 105.25 |
| 100000 | 0.94 | 0.4  | 0.6  | 15040 | 48000 | 36000 | 21.56  | 0.3979 | 0.4021 | 0.5979 | 0.6021 | 15829 | 47913 | 36258 | 16172 | 48085 | 35743 | 41.29  | 81.27  |
| 100000 | 0.95 | 0.4  | 0.6  | 15200 | 48000 | 36000 | 14.87  | 0.3979 | 0.4021 | 0.5979 | 0.6021 | 15829 | 47913 | 36258 | 16172 | 48085 | 35743 | 26.97  | 60.45  |
| 100000 | 0.96 | 0.4  | 0.6  | 15360 | 48000 | 36000 | 9.46   | 0.3979 | 0.4021 | 0.5979 | 0.6021 | 15829 | 47913 | 36258 | 16172 | 48085 | 35743 | 15.87  | 42.79  |
| 100000 | 0.97 | 0.4  | 0.6  | 15520 | 48000 | 36000 | 5.29   | 0.3979 | 0.4021 | 0.5979 | 0.6021 | 15829 | 47913 | 36258 | 16172 | 48085 | 35743 | 8.01   | 28.31  |
| 100000 | 0.98 | 0.4  | 0.6  | 15680 | 48000 | 36000 | 2.33   | 0.3979 | 0.4021 | 0.5979 | 0.6021 | 15829 | 47913 | 36258 | 16172 | 48085 | 35743 | 3.39   | 16.98  |
| 100000 | 0.99 | 0.4  | 0.6  | 15840 | 48000 | 36000 | 0.58   | 0.3979 | 0.4021 | 0.5979 | 0.6021 | 15829 | 47913 | 36258 | 16172 | 48085 | 35743 | 2.00   | 8.83   |
| 100000 | 1.00 | 0.4  | 0.6  | 16000 | 48000 | 36000 | 0.00   | 0.3979 | 0.4021 | 0.5979 | 0.6021 | 15829 | 47913 | 36258 | 16172 | 48085 | 35743 | 3.85   | 3.83   |
| 100000 | 1.01 | 0.4  | 0.6  | 16160 | 48000 | 36000 | 0.57   | 0.3979 | 0.4021 | 0.5979 | 0.6021 | 15829 | 47913 | 36258 | 16172 | 48085 | 35743 | 8.93   | 2.01   |
| 100000 | 1.02 | 0.4  | 0.6  | 16320 | 48000 | 36000 | 2.27   | 0.3979 | 0.4021 | 0.5979 | 0.6021 | 15829 | 47913 | 36258 | 16172 | 48085 | 35743 | 17.24  | 3.35   |
| 100000 | 1.03 | 0.4  | 0.6  | 16480 | 48000 | 36000 | 5.09   | 0.3979 | 0.4021 | 0.5979 | 0.6021 | 15829 | 47913 | 36258 | 16172 | 48085 | 35743 | 28.79  | 7.86   |
| 100000 | 1.04 | 0.4  | 0.6  | 16640 | 48000 | 36000 | 8.99   | 0.3979 | 0.4021 | 0.5979 | 0.6021 | 15829 | 47913 | 36258 | 16172 | 48085 | 35743 | 43.58  | 15.53  |
| 100000 | 1.05 | 0.4  | 0.6  | 16800 | 48000 | 36000 | 13.95  | 0.3979 | 0.4021 | 0.5979 | 0.6021 | 15829 | 47913 | 36258 | 16172 | 48085 | 35743 | 61.60  | 26.37  |
| 100000 | 1.06 | 0.4  | 0.6  | 16960 | 48000 | 36000 | 19.97  | 0.3979 | 0.4021 | 0.5979 | 0.6021 | 15829 | 47913 | 36258 | 16172 | 48085 | 35743 | 82.85  | 40.37  |
| 100000 | 1.07 | 0.4  | 0.6  | 17120 | 48000 | 36000 | 27.01  | 0.3979 | 0.4021 | 0.5979 | 0.6021 | 15829 | 47913 | 36258 | 16172 | 48085 | 35743 | 107.34 | 57.54  |
| 100000 | 1.08 | 0.4  | 0.6  | 17280 | 48000 | 36000 | 35.06  | 0.3979 | 0.4021 | 0.5979 | 0.6021 | 15829 | 47913 | 36258 | 16172 | 48085 | 35743 | 135.06 | 77.88  |
| 100000 | 1.09 | 0.4  | 0.6  | 17440 | 48000 | 36000 | 44.10  | 0.3979 | 0.4021 | 0.5979 | 0.6021 | 15829 | 47913 | 36258 | 16172 | 48085 | 35743 | 166.02 | 101.38 |

|        |      |      |      |       |       |       |        |        |        |        |        |       |       |       |       |       |       |        |        |
|--------|------|------|------|-------|-------|-------|--------|--------|--------|--------|--------|-------|-------|-------|-------|-------|-------|--------|--------|
| 100000 | 1.10 | 0.4  | 0.6  | 17600 | 48000 | 36000 | 54.11  | 0.3979 | 0.4021 | 0.5979 | 0.6021 | 15829 | 47913 | 36258 | 16172 | 48085 | 35743 | 200.21 | 128.05 |
| 100000 | 1.11 | 0.4  | 0.6  | 17760 | 48000 | 36000 | 65.07  | 0.3979 | 0.4021 | 0.5979 | 0.6021 | 15829 | 47913 | 36258 | 16172 | 48085 | 35743 | 237.64 | 157.89 |
| 100000 | 1.12 | 0.4  | 0.6  | 17920 | 48000 | 36000 | 76.97  | 0.3979 | 0.4021 | 0.5979 | 0.6021 | 15829 | 47913 | 36258 | 16172 | 48085 | 35743 | 278.30 | 190.89 |
| 100000 | 1.13 | 0.4  | 0.6  | 18080 | 48000 | 36000 | 89.79  | 0.3979 | 0.4021 | 0.5979 | 0.6021 | 15829 | 47913 | 36258 | 16172 | 48085 | 35743 | 322.20 | 227.05 |
| 100000 | 1.14 | 0.4  | 0.6  | 18240 | 48000 | 36000 | 103.51 | 0.3979 | 0.4021 | 0.5979 | 0.6021 | 15829 | 47913 | 36258 | 16172 | 48085 | 35743 | 369.33 | 266.39 |
| 100000 | 1.15 | 0.4  | 0.6  | 18400 | 48000 | 36000 | 118.11 | 0.3979 | 0.4021 | 0.5979 | 0.6021 | 15829 | 47913 | 36258 | 16172 | 48085 | 35743 | 419.69 | 308.88 |
| 100000 | 1.16 | 0.4  | 0.6  | 18560 | 48000 | 36000 | 133.58 | 0.3979 | 0.4021 | 0.5979 | 0.6021 | 15829 | 47913 | 36258 | 16172 | 48085 | 35743 | 473.29 | 354.55 |
| 100000 | 1.17 | 0.4  | 0.6  | 18720 | 48000 | 36000 | 149.91 | 0.3979 | 0.4021 | 0.5979 | 0.6021 | 15829 | 47913 | 36258 | 16172 | 48085 | 35743 | 530.13 | 403.38 |
| 100000 | 1.18 | 0.4  | 0.6  | 18880 | 48000 | 36000 | 167.07 | 0.3979 | 0.4021 | 0.5979 | 0.6021 | 15829 | 47913 | 36258 | 16172 | 48085 | 35743 | 590.20 | 455.37 |
| 100000 | 1.19 | 0.4  | 0.6  | 19040 | 48000 | 36000 | 185.06 | 0.3979 | 0.4021 | 0.5979 | 0.6021 | 15829 | 47913 | 36258 | 16172 | 48085 | 35743 | 653.50 | 510.53 |
| 100000 | 1.20 | 0.4  | 0.6  | 19200 | 48000 | 36000 | 203.85 | 0.3979 | 0.4021 | 0.5979 | 0.6021 | 15829 | 47913 | 36258 | 16172 | 48085 | 35743 | 720.04 | 568.86 |
| 100000 | 0.80 | 0.45 | 0.55 | 16200 | 49500 | 30250 | 283.90 | 0.4478 | 0.4522 | 0.5478 | 0.5522 | 20054 | 49455 | 30490 | 20447 | 49543 | 30011 | 742.68 | 883.97 |
| 100000 | 0.81 | 0.45 | 0.55 | 16403 | 49500 | 30250 | 254.24 | 0.4478 | 0.4522 | 0.5478 | 0.5522 | 20054 | 49455 | 30490 | 20447 | 49543 | 30011 | 666.89 | 801.86 |
| 100000 | 0.82 | 0.45 | 0.55 | 16605 | 49500 | 30250 | 226.43 | 0.4478 | 0.4522 | 0.5478 | 0.5522 | 20054 | 49455 | 30490 | 20447 | 49543 | 30011 | 595.19 | 723.76 |
| 100000 | 0.83 | 0.45 | 0.55 | 16808 | 49500 | 30250 | 200.43 | 0.4478 | 0.4522 | 0.5478 | 0.5522 | 20054 | 49455 | 30490 | 20447 | 49543 | 30011 | 527.58 | 649.67 |
| 100000 | 0.84 | 0.45 | 0.55 | 17010 | 49500 | 30250 | 176.19 | 0.4478 | 0.4522 | 0.5478 | 0.5522 | 20054 | 49455 | 30490 | 20447 | 49543 | 30011 | 464.05 | 579.59 |
| 100000 | 0.85 | 0.45 | 0.55 | 17213 | 49500 | 30250 | 153.69 | 0.4478 | 0.4522 | 0.5478 | 0.5522 | 20054 | 49455 | 30490 | 20447 | 49543 | 30011 | 404.62 | 513.52 |
| 100000 | 0.86 | 0.45 | 0.55 | 17415 | 49500 | 30250 | 132.87 | 0.4478 | 0.4522 | 0.5478 | 0.5522 | 20054 | 49455 | 30490 | 20447 | 49543 | 30011 | 349.27 | 451.47 |
| 100000 | 0.87 | 0.45 | 0.55 | 17618 | 49500 | 30250 | 113.71 | 0.4478 | 0.4522 | 0.5478 | 0.5522 | 20054 | 49455 | 30490 | 20447 | 49543 | 30011 | 298.02 | 393.42 |
| 100000 | 0.88 | 0.45 | 0.55 | 17820 | 49500 | 30250 | 96.17  | 0.4478 | 0.4522 | 0.5478 | 0.5522 | 20054 | 49455 | 30490 | 20447 | 49543 | 30011 | 250.85 | 339.39 |
| 100000 | 0.89 | 0.45 | 0.55 | 18023 | 49500 | 30250 | 80.21  | 0.4478 | 0.4522 | 0.5478 | 0.5522 | 20054 | 49455 | 30490 | 20447 | 49543 | 30011 | 207.77 | 289.37 |
| 100000 | 0.90 | 0.45 | 0.55 | 18225 | 49500 | 30250 | 65.81  | 0.4478 | 0.4522 | 0.5478 | 0.5522 | 20054 | 49455 | 30490 | 20447 | 49543 | 30011 | 168.79 | 243.35 |
| 100000 | 0.91 | 0.45 | 0.55 | 18428 | 49500 | 30250 | 52.91  | 0.4478 | 0.4522 | 0.5478 | 0.5522 | 20054 | 49455 | 30490 | 20447 | 49543 | 30011 | 133.89 | 201.35 |
| 100000 | 0.92 | 0.45 | 0.55 | 18630 | 49500 | 30250 | 41.50  | 0.4478 | 0.4522 | 0.5478 | 0.5522 | 20054 | 49455 | 30490 | 20447 | 49543 | 30011 | 103.08 | 163.36 |
| 100000 | 0.93 | 0.45 | 0.55 | 18833 | 49500 | 30250 | 31.55  | 0.4478 | 0.4522 | 0.5478 | 0.5522 | 20054 | 49455 | 30490 | 20447 | 49543 | 30011 | 76.37  | 129.38 |
| 100000 | 0.94 | 0.45 | 0.55 | 19035 | 49500 | 30250 | 23.01  | 0.4478 | 0.4522 | 0.5478 | 0.5522 | 20054 | 49455 | 30490 | 20447 | 49543 | 30011 | 53.74  | 99.41  |
| 100000 | 0.95 | 0.45 | 0.55 | 19238 | 49500 | 30250 | 15.86  | 0.4478 | 0.4522 | 0.5478 | 0.5522 | 20054 | 49455 | 30490 | 20447 | 49543 | 30011 | 35.20  | 73.46  |
| 100000 | 0.96 | 0.45 | 0.55 | 19440 | 49500 | 30250 | 10.08  | 0.4478 | 0.4522 | 0.5478 | 0.5522 | 20054 | 49455 | 30490 | 20447 | 49543 | 30011 | 20.75  | 51.51  |
| 100000 | 0.97 | 0.45 | 0.55 | 19643 | 49500 | 30250 | 5.63   | 0.4478 | 0.4522 | 0.5478 | 0.5522 | 20054 | 49455 | 30490 | 20447 | 49543 | 30011 | 10.39  | 33.58  |
| 100000 | 0.98 | 0.45 | 0.55 | 19845 | 49500 | 30250 | 2.48   | 0.4478 | 0.4522 | 0.5478 | 0.5522 | 20054 | 49455 | 30490 | 20447 | 49543 | 30011 | 4.12   | 19.65  |
| 100000 | 0.99 | 0.45 | 0.55 | 20048 | 49500 | 30250 | 0.62   | 0.4478 | 0.4522 | 0.5478 | 0.5522 | 20054 | 49455 | 30490 | 20447 | 49543 | 30011 | 1.94   | 9.74   |
| 100000 | 1.00 | 0.45 | 0.55 | 20250 | 49500 | 30250 | 0.00   | 0.4478 | 0.4522 | 0.5478 | 0.5522 | 20054 | 49455 | 30490 | 20447 | 49543 | 30011 | 3.85   | 3.84   |
| 100000 | 1.01 | 0.45 | 0.55 | 20453 | 49500 | 30250 | 0.61   | 0.4478 | 0.4522 | 0.5478 | 0.5522 | 20054 | 49455 | 30490 | 20447 | 49543 | 30011 | 9.84   | 1.95   |
| 100000 | 1.02 | 0.45 | 0.55 | 20655 | 49500 | 30250 | 2.42   | 0.4478 | 0.4522 | 0.5478 | 0.5522 | 20054 | 49455 | 30490 | 20447 | 49543 | 30011 | 19.93  | 4.07   |
| 100000 | 1.03 | 0.45 | 0.55 | 20858 | 49500 | 30250 | 5.40   | 0.4478 | 0.4522 | 0.5478 | 0.5522 | 20054 | 49455 | 30490 | 20447 | 49543 | 30011 | 34.11  | 10.20  |



|        |      |      |      |       |       |       |        |        |        |        |        |       |       |       |       |       |       |        |         |
|--------|------|------|------|-------|-------|-------|--------|--------|--------|--------|--------|-------|-------|-------|-------|-------|-------|--------|---------|
| 100000 | 1.04 | 0.45 | 0.55 | 21060 | 49500 | 30250 | 9.53   | 0.4478 | 0.4522 | 0.5478 | 0.5522 | 20054 | 49455 | 30490 | 20447 | 49543 | 30011 | 52.37  | 20.34   |
| 100000 | 1.05 | 0.45 | 0.55 | 21263 | 49500 | 30250 | 14.80  | 0.4478 | 0.4522 | 0.5478 | 0.5522 | 20054 | 49455 | 30490 | 20447 | 49543 | 30011 | 74.73  | 34.49   |
| 100000 | 1.06 | 0.45 | 0.55 | 21465 | 49500 | 30250 | 21.16  | 0.4478 | 0.4522 | 0.5478 | 0.5522 | 20054 | 49455 | 30490 | 20447 | 49543 | 30011 | 101.18 | 52.66   |
| 100000 | 1.07 | 0.45 | 0.55 | 21668 | 49500 | 30250 | 28.61  | 0.4478 | 0.4522 | 0.5478 | 0.5522 | 20054 | 49455 | 30490 | 20447 | 49543 | 30011 | 131.71 | 74.83   |
| 100000 | 1.08 | 0.45 | 0.55 | 21870 | 49500 | 30250 | 37.12  | 0.4478 | 0.4522 | 0.5478 | 0.5522 | 20054 | 49455 | 30490 | 20447 | 49543 | 30011 | 166.34 | 101.02  |
| 100000 | 1.09 | 0.45 | 0.55 | 22073 | 49500 | 30250 | 46.67  | 0.4478 | 0.4522 | 0.5478 | 0.5522 | 20054 | 49455 | 30490 | 20447 | 49543 | 30011 | 205.05 | 131.22  |
| 100000 | 1.10 | 0.45 | 0.55 | 22275 | 49500 | 30250 | 57.23  | 0.4478 | 0.4522 | 0.5478 | 0.5522 | 20054 | 49455 | 30490 | 20447 | 49543 | 30011 | 247.86 | 165.43  |
| 100000 | 1.11 | 0.45 | 0.55 | 22478 | 49500 | 30250 | 68.79  | 0.4478 | 0.4522 | 0.5478 | 0.5522 | 20054 | 49455 | 30490 | 20447 | 49543 | 30011 | 294.75 | 203.65  |
| 100000 | 1.12 | 0.45 | 0.55 | 22680 | 49500 | 30250 | 81.33  | 0.4478 | 0.4522 | 0.5478 | 0.5522 | 20054 | 49455 | 30490 | 20447 | 49543 | 30011 | 345.73 | 245.88  |
| 100000 | 1.13 | 0.45 | 0.55 | 22883 | 49500 | 30250 | 94.83  | 0.4478 | 0.4522 | 0.5478 | 0.5522 | 20054 | 49455 | 30490 | 20447 | 49543 | 30011 | 400.80 | 292.12  |
| 100000 | 1.14 | 0.45 | 0.55 | 23085 | 49500 | 30250 | 109.26 | 0.4478 | 0.4522 | 0.5478 | 0.5522 | 20054 | 49455 | 30490 | 20447 | 49543 | 30011 | 459.97 | 342.37  |
| 100000 | 1.15 | 0.45 | 0.55 | 23288 | 49500 | 30250 | 124.62 | 0.4478 | 0.4522 | 0.5478 | 0.5522 | 20054 | 49455 | 30490 | 20447 | 49543 | 30011 | 523.22 | 396.64  |
| 100000 | 1.16 | 0.45 | 0.55 | 23490 | 49500 | 30250 | 140.88 | 0.4478 | 0.4522 | 0.5478 | 0.5522 | 20054 | 49455 | 30490 | 20447 | 49543 | 30011 | 590.56 | 454.91  |
| 100000 | 1.17 | 0.45 | 0.55 | 23693 | 49500 | 30250 | 158.02 | 0.4478 | 0.4522 | 0.5478 | 0.5522 | 20054 | 49455 | 30490 | 20447 | 49543 | 30011 | 661.99 | 517.20  |
| 100000 | 1.18 | 0.45 | 0.55 | 23895 | 49500 | 30250 | 176.03 | 0.4478 | 0.4522 | 0.5478 | 0.5522 | 20054 | 49455 | 30490 | 20447 | 49543 | 30011 | 737.51 | 583.49  |
| 100000 | 1.19 | 0.45 | 0.55 | 24098 | 49500 | 30250 | 194.89 | 0.4478 | 0.4522 | 0.5478 | 0.5522 | 20054 | 49455 | 30490 | 20447 | 49543 | 30011 | 817.12 | 653.80  |
| 100000 | 1.20 | 0.45 | 0.55 | 24300 | 49500 | 30250 | 214.59 | 0.4478 | 0.4522 | 0.5478 | 0.5522 | 20054 | 49455 | 30490 | 20447 | 49543 | 30011 | 900.82 | 728.12  |
| 100000 | 0.80 | 0.5  | 0.5  | 20000 | 50000 | 25000 | 293.21 | 0.4978 | 0.5022 | 0.4978 | 0.5022 | 24781 | 49999 | 25220 | 25220 | 49999 | 24781 | 924.43 | 1082.21 |
| 100000 | 0.81 | 0.5  | 0.5  | 20250 | 50000 | 25000 | 262.39 | 0.4978 | 0.5022 | 0.4978 | 0.5022 | 24781 | 49999 | 25220 | 25220 | 49999 | 24781 | 830.48 | 981.21  |
| 100000 | 0.82 | 0.5  | 0.5  | 20500 | 50000 | 25000 | 233.53 | 0.4978 | 0.5022 | 0.4978 | 0.5022 | 24781 | 49999 | 25220 | 25220 | 49999 | 24781 | 741.58 | 885.16  |
| 100000 | 0.83 | 0.5  | 0.5  | 20750 | 50000 | 25000 | 206.57 | 0.4978 | 0.5022 | 0.4978 | 0.5022 | 24781 | 49999 | 25220 | 25220 | 49999 | 24781 | 657.72 | 794.07  |
| 100000 | 0.84 | 0.5  | 0.5  | 21000 | 50000 | 25000 | 181.47 | 0.4978 | 0.5022 | 0.4978 | 0.5022 | 24781 | 49999 | 25220 | 25220 | 49999 | 24781 | 578.90 | 707.93  |
| 100000 | 0.85 | 0.5  | 0.5  | 21250 | 50000 | 25000 | 158.19 | 0.4978 | 0.5022 | 0.4978 | 0.5022 | 24781 | 49999 | 25220 | 25220 | 49999 | 24781 | 505.13 | 626.75  |
| 100000 | 0.86 | 0.5  | 0.5  | 21500 | 50000 | 25000 | 136.68 | 0.4978 | 0.5022 | 0.4978 | 0.5022 | 24781 | 49999 | 25220 | 25220 | 49999 | 24781 | 436.40 | 550.53  |
| 100000 | 0.87 | 0.5  | 0.5  | 21750 | 50000 | 25000 | 116.89 | 0.4978 | 0.5022 | 0.4978 | 0.5022 | 24781 | 49999 | 25220 | 25220 | 49999 | 24781 | 372.72 | 479.27  |
| 100000 | 0.88 | 0.5  | 0.5  | 22000 | 50000 | 25000 | 98.80  | 0.4978 | 0.5022 | 0.4978 | 0.5022 | 24781 | 49999 | 25220 | 25220 | 49999 | 24781 | 314.08 | 412.96  |
| 100000 | 0.89 | 0.5  | 0.5  | 22250 | 50000 | 25000 | 82.36  | 0.4978 | 0.5022 | 0.4978 | 0.5022 | 24781 | 49999 | 25220 | 25220 | 49999 | 24781 | 260.48 | 351.60  |
| 100000 | 0.90 | 0.5  | 0.5  | 22500 | 50000 | 25000 | 67.52  | 0.4978 | 0.5022 | 0.4978 | 0.5022 | 24781 | 49999 | 25220 | 25220 | 49999 | 24781 | 211.93 | 295.21  |
| 100000 | 0.91 | 0.5  | 0.5  | 22750 | 50000 | 25000 | 54.26  | 0.4978 | 0.5022 | 0.4978 | 0.5022 | 24781 | 49999 | 25220 | 25220 | 49999 | 24781 | 168.42 | 243.76  |
| 100000 | 0.92 | 0.5  | 0.5  | 23000 | 50000 | 25000 | 42.53  | 0.4978 | 0.5022 | 0.4978 | 0.5022 | 24781 | 49999 | 25220 | 25220 | 49999 | 24781 | 129.96 | 197.28  |
| 100000 | 0.93 | 0.5  | 0.5  | 23250 | 50000 | 25000 | 32.31  | 0.4978 | 0.5022 | 0.4978 | 0.5022 | 24781 | 49999 | 25220 | 25220 | 49999 | 24781 | 96.54  | 155.75  |
| 100000 | 0.94 | 0.5  | 0.5  | 23500 | 50000 | 25000 | 23.55  | 0.4978 | 0.5022 | 0.4978 | 0.5022 | 24781 | 49999 | 25220 | 25220 | 49999 | 24781 | 68.17  | 119.18  |
| 100000 | 0.95 | 0.5  | 0.5  | 23750 | 50000 | 25000 | 16.23  | 0.4978 | 0.5022 | 0.4978 | 0.5022 | 24781 | 49999 | 25220 | 25220 | 49999 | 24781 | 44.83  | 87.57   |
| 100000 | 0.96 | 0.5  | 0.5  | 24000 | 50000 | 25000 | 10.31  | 0.4978 | 0.5022 | 0.4978 | 0.5022 | 24781 | 49999 | 25220 | 25220 | 49999 | 24781 | 26.55  | 60.91   |
| 100000 | 0.97 | 0.5  | 0.5  | 24250 | 50000 | 25000 | 5.75   | 0.4978 | 0.5022 | 0.4978 | 0.5022 | 24781 | 49999 | 25220 | 25220 | 49999 | 24781 | 13.31  | 39.21   |

|        |      |      |      |       |       |       |        |        |        |        |        |       |       |       |       |       |       |         |         |
|--------|------|------|------|-------|-------|-------|--------|--------|--------|--------|--------|-------|-------|-------|-------|-------|-------|---------|---------|
| 100000 | 0.98 | 0.5  | 0.5  | 24500 | 50000 | 25000 | 2.54   | 0.4978 | 0.5022 | 0.4978 | 0.5022 | 24781 | 49999 | 25220 | 25220 | 49999 | 24781 | 5.11    | 22.46   |
| 100000 | 0.99 | 0.5  | 0.5  | 24750 | 50000 | 25000 | 0.63   | 0.4978 | 0.5022 | 0.4978 | 0.5022 | 24781 | 49999 | 25220 | 25220 | 49999 | 24781 | 1.95    | 10.67   |
| 100000 | 1.00 | 0.5  | 0.5  | 25000 | 50000 | 25000 | 0.00   | 0.4978 | 0.5022 | 0.4978 | 0.5022 | 24781 | 49999 | 25220 | 25220 | 49999 | 24781 | 3.84    | 3.84    |
| 100000 | 1.01 | 0.5  | 0.5  | 25250 | 50000 | 25000 | 0.62   | 0.4978 | 0.5022 | 0.4978 | 0.5022 | 24781 | 49999 | 25220 | 25220 | 49999 | 24781 | 10.78   | 1.97    |
| 100000 | 1.02 | 0.5  | 0.5  | 25500 | 50000 | 25000 | 2.46   | 0.4978 | 0.5022 | 0.4978 | 0.5022 | 24781 | 49999 | 25220 | 25220 | 49999 | 24781 | 22.75   | 5.05    |
| 100000 | 1.03 | 0.5  | 0.5  | 25750 | 50000 | 25000 | 5.50   | 0.4978 | 0.5022 | 0.4978 | 0.5022 | 24781 | 49999 | 25220 | 25220 | 49999 | 24781 | 39.78   | 13.08   |
| 100000 | 1.04 | 0.5  | 0.5  | 26000 | 50000 | 25000 | 9.71   | 0.4978 | 0.5022 | 0.4978 | 0.5022 | 24781 | 49999 | 25220 | 25220 | 49999 | 24781 | 61.84   | 26.08   |
| 100000 | 1.05 | 0.5  | 0.5  | 26250 | 50000 | 25000 | 15.06  | 0.4978 | 0.5022 | 0.4978 | 0.5022 | 24781 | 49999 | 25220 | 25220 | 49999 | 24781 | 88.95   | 44.03   |
| 100000 | 1.06 | 0.5  | 0.5  | 26500 | 50000 | 25000 | 21.53  | 0.4978 | 0.5022 | 0.4978 | 0.5022 | 24781 | 49999 | 25220 | 25220 | 49999 | 24781 | 121.11  | 66.93   |
| 100000 | 1.07 | 0.5  | 0.5  | 26750 | 50000 | 25000 | 29.09  | 0.4978 | 0.5022 | 0.4978 | 0.5022 | 24781 | 49999 | 25220 | 25220 | 49999 | 24781 | 158.30  | 94.80   |
| 100000 | 1.08 | 0.5  | 0.5  | 27000 | 50000 | 25000 | 37.72  | 0.4978 | 0.5022 | 0.4978 | 0.5022 | 24781 | 49999 | 25220 | 25220 | 49999 | 24781 | 200.55  | 127.62  |
| 100000 | 1.09 | 0.5  | 0.5  | 27250 | 50000 | 25000 | 47.40  | 0.4978 | 0.5022 | 0.4978 | 0.5022 | 24781 | 49999 | 25220 | 25220 | 49999 | 24781 | 247.83  | 165.39  |
| 100000 | 1.10 | 0.5  | 0.5  | 27500 | 50000 | 25000 | 58.11  | 0.4978 | 0.5022 | 0.4978 | 0.5022 | 24781 | 49999 | 25220 | 25220 | 49999 | 24781 | 300.16  | 208.12  |
| 100000 | 1.11 | 0.5  | 0.5  | 27750 | 50000 | 25000 | 69.81  | 0.4978 | 0.5022 | 0.4978 | 0.5022 | 24781 | 49999 | 25220 | 25220 | 49999 | 24781 | 357.54  | 255.81  |
| 100000 | 1.12 | 0.5  | 0.5  | 28000 | 50000 | 25000 | 82.50  | 0.4978 | 0.5022 | 0.4978 | 0.5022 | 24781 | 49999 | 25220 | 25220 | 49999 | 24781 | 419.96  | 308.46  |
| 100000 | 1.13 | 0.5  | 0.5  | 28250 | 50000 | 25000 | 96.15  | 0.4978 | 0.5022 | 0.4978 | 0.5022 | 24781 | 49999 | 25220 | 25220 | 49999 | 24781 | 487.42  | 366.06  |
| 100000 | 1.14 | 0.5  | 0.5  | 28500 | 50000 | 25000 | 110.74 | 0.4978 | 0.5022 | 0.4978 | 0.5022 | 24781 | 49999 | 25220 | 25220 | 49999 | 24781 | 559.93  | 428.62  |
| 100000 | 1.15 | 0.5  | 0.5  | 28750 | 50000 | 25000 | 126.25 | 0.4978 | 0.5022 | 0.4978 | 0.5022 | 24781 | 49999 | 25220 | 25220 | 49999 | 24781 | 637.48  | 496.13  |
| 100000 | 1.16 | 0.5  | 0.5  | 29000 | 50000 | 25000 | 142.66 | 0.4978 | 0.5022 | 0.4978 | 0.5022 | 24781 | 49999 | 25220 | 25220 | 49999 | 24781 | 720.08  | 568.60  |
| 100000 | 1.17 | 0.5  | 0.5  | 29250 | 50000 | 25000 | 159.95 | 0.4978 | 0.5022 | 0.4978 | 0.5022 | 24781 | 49999 | 25220 | 25220 | 49999 | 24781 | 807.72  | 646.03  |
| 100000 | 1.18 | 0.5  | 0.5  | 29500 | 50000 | 25000 | 178.11 | 0.4978 | 0.5022 | 0.4978 | 0.5022 | 24781 | 49999 | 25220 | 25220 | 49999 | 24781 | 900.40  | 728.42  |
| 100000 | 1.19 | 0.5  | 0.5  | 29750 | 50000 | 25000 | 197.11 | 0.4978 | 0.5022 | 0.4978 | 0.5022 | 24781 | 49999 | 25220 | 25220 | 49999 | 24781 | 998.13  | 815.76  |
| 100000 | 1.20 | 0.5  | 0.5  | 30000 | 50000 | 25000 | 216.94 | 0.4978 | 0.5022 | 0.4978 | 0.5022 | 24781 | 49999 | 25220 | 25220 | 49999 | 24781 | 1100.90 | 908.05  |
| 100000 | 0.80 | 0.55 | 0.45 | 24200 | 49500 | 20250 | 290.62 | 0.5478 | 0.5522 | 0.4478 | 0.4522 | 30011 | 49543 | 20447 | 30490 | 49455 | 20054 | 1126.98 | 1299.68 |
| 100000 | 0.81 | 0.55 | 0.45 | 24503 | 49500 | 20250 | 259.91 | 0.5478 | 0.5522 | 0.4478 | 0.4522 | 30011 | 49543 | 20447 | 30490 | 49455 | 20054 | 1012.89 | 1177.86 |
| 100000 | 0.82 | 0.55 | 0.45 | 24805 | 49500 | 20250 | 231.17 | 0.5478 | 0.5522 | 0.4478 | 0.4522 | 30011 | 49543 | 20447 | 30490 | 49455 | 20054 | 904.90  | 1062.05 |
| 100000 | 0.83 | 0.55 | 0.45 | 25108 | 49500 | 20250 | 204.35 | 0.5478 | 0.5522 | 0.4478 | 0.4522 | 30011 | 49543 | 20447 | 30490 | 49455 | 20054 | 803.00  | 952.24  |
| 100000 | 0.84 | 0.55 | 0.45 | 25410 | 49500 | 20250 | 179.41 | 0.5478 | 0.5522 | 0.4478 | 0.4522 | 30011 | 49543 | 20447 | 30490 | 49455 | 20054 | 707.21  | 848.44  |
| 100000 | 0.85 | 0.55 | 0.45 | 25713 | 49500 | 20250 | 156.30 | 0.5478 | 0.5522 | 0.4478 | 0.4522 | 30011 | 49543 | 20447 | 30490 | 49455 | 20054 | 617.51  | 750.63  |
| 100000 | 0.86 | 0.55 | 0.45 | 26015 | 49500 | 20250 | 134.96 | 0.5478 | 0.5522 | 0.4478 | 0.4522 | 30011 | 49543 | 20447 | 30490 | 49455 | 20054 | 533.91  | 658.83  |
| 100000 | 0.87 | 0.55 | 0.45 | 26318 | 49500 | 20250 | 115.36 | 0.5478 | 0.5522 | 0.4478 | 0.4522 | 30011 | 49543 | 20447 | 30490 | 49455 | 20054 | 456.41  | 573.03  |
| 100000 | 0.88 | 0.55 | 0.45 | 26620 | 49500 | 20250 | 97.45  | 0.5478 | 0.5522 | 0.4478 | 0.4522 | 30011 | 49543 | 20447 | 30490 | 49455 | 20054 | 385.01  | 493.23  |
| 100000 | 0.89 | 0.55 | 0.45 | 26923 | 49500 | 20250 | 81.18  | 0.5478 | 0.5522 | 0.4478 | 0.4522 | 30011 | 49543 | 20447 | 30490 | 49455 | 20054 | 319.70  | 419.44  |
| 100000 | 0.90 | 0.55 | 0.45 | 27225 | 49500 | 20250 | 66.52  | 0.5478 | 0.5522 | 0.4478 | 0.4522 | 30011 | 49543 | 20447 | 30490 | 49455 | 20054 | 260.50  | 351.65  |
| 100000 | 0.91 | 0.55 | 0.45 | 27528 | 49500 | 20250 | 53.42  | 0.5478 | 0.5522 | 0.4478 | 0.4522 | 30011 | 49543 | 20447 | 30490 | 49455 | 20054 | 207.39  | 289.85  |

|        |      |      |      |       |       |       |        |        |        |        |        |       |       |       |       |       |       |         |         |
|--------|------|------|------|-------|-------|-------|--------|--------|--------|--------|--------|-------|-------|-------|-------|-------|-------|---------|---------|
| 100000 | 0.92 | 0.55 | 0.45 | 27830 | 49500 | 20250 | 41.86  | 0.5478 | 0.5522 | 0.4478 | 0.4522 | 30011 | 49543 | 20447 | 30490 | 49455 | 20054 | 160.38  | 234.07  |
| 100000 | 0.93 | 0.55 | 0.45 | 28133 | 49500 | 20250 | 31.78  | 0.5478 | 0.5522 | 0.4478 | 0.4522 | 30011 | 49543 | 20447 | 30490 | 49455 | 20054 | 119.47  | 184.28  |
| 100000 | 0.94 | 0.55 | 0.45 | 28435 | 49500 | 20250 | 23.16  | 0.5478 | 0.5522 | 0.4478 | 0.4522 | 30011 | 49543 | 20447 | 30490 | 49455 | 20054 | 84.65   | 140.50  |
| 100000 | 0.95 | 0.55 | 0.45 | 28738 | 49500 | 20250 | 15.95  | 0.5478 | 0.5522 | 0.4478 | 0.4522 | 30011 | 49543 | 20447 | 30490 | 49455 | 20054 | 55.94   | 102.72  |
| 100000 | 0.96 | 0.55 | 0.45 | 29040 | 49500 | 20250 | 10.12  | 0.5478 | 0.5522 | 0.4478 | 0.4522 | 30011 | 49543 | 20447 | 30490 | 49455 | 20054 | 33.32   | 70.94   |
| 100000 | 0.97 | 0.55 | 0.45 | 29343 | 49500 | 20250 | 5.65   | 0.5478 | 0.5522 | 0.4478 | 0.4522 | 30011 | 49543 | 20447 | 30490 | 49455 | 20054 | 16.80   | 45.16   |
| 100000 | 0.98 | 0.55 | 0.45 | 29645 | 49500 | 20250 | 2.49   | 0.5478 | 0.5522 | 0.4478 | 0.4522 | 30011 | 49543 | 20447 | 30490 | 49455 | 20054 | 6.38    | 25.39   |
| 100000 | 0.99 | 0.55 | 0.45 | 29948 | 49500 | 20250 | 0.62   | 0.5478 | 0.5522 | 0.4478 | 0.4522 | 30011 | 49543 | 20447 | 30490 | 49455 | 20054 | 2.06    | 11.61   |
| 100000 | 1.00 | 0.55 | 0.45 | 30250 | 49500 | 20250 | 0.00   | 0.5478 | 0.5522 | 0.4478 | 0.4522 | 30011 | 49543 | 20447 | 30490 | 49455 | 20054 | 3.84    | 3.85    |
| 100000 | 1.01 | 0.55 | 0.45 | 30553 | 49500 | 20250 | 0.61   | 0.5478 | 0.5522 | 0.4478 | 0.4522 | 30011 | 49543 | 20447 | 30490 | 49455 | 20054 | 11.71   | 2.08    |
| 100000 | 1.02 | 0.55 | 0.45 | 30855 | 49500 | 20250 | 2.41   | 0.5478 | 0.5522 | 0.4478 | 0.4522 | 30011 | 49543 | 20447 | 30490 | 49455 | 20054 | 25.69   | 6.31    |
| 100000 | 1.03 | 0.55 | 0.45 | 31158 | 49500 | 20250 | 5.38   | 0.5478 | 0.5522 | 0.4478 | 0.4522 | 30011 | 49543 | 20447 | 30490 | 49455 | 20054 | 45.76   | 16.55   |
| 100000 | 1.04 | 0.55 | 0.45 | 31460 | 49500 | 20250 | 9.50   | 0.5478 | 0.5522 | 0.4478 | 0.4522 | 30011 | 49543 | 20447 | 30490 | 49455 | 20054 | 71.93   | 32.79   |
| 100000 | 1.05 | 0.55 | 0.45 | 31763 | 49500 | 20250 | 14.72  | 0.5478 | 0.5522 | 0.4478 | 0.4522 | 30011 | 49543 | 20447 | 30490 | 49455 | 20054 | 104.19  | 55.03   |
| 100000 | 1.06 | 0.55 | 0.45 | 32065 | 49500 | 20250 | 21.04  | 0.5478 | 0.5522 | 0.4478 | 0.4522 | 30011 | 49543 | 20447 | 30490 | 49455 | 20054 | 142.56  | 83.28   |
| 100000 | 1.07 | 0.55 | 0.45 | 32368 | 49500 | 20250 | 28.42  | 0.5478 | 0.5522 | 0.4478 | 0.4522 | 30011 | 49543 | 20447 | 30490 | 49455 | 20054 | 187.02  | 117.52  |
| 100000 | 1.08 | 0.55 | 0.45 | 32670 | 49500 | 20250 | 36.84  | 0.5478 | 0.5522 | 0.4478 | 0.4522 | 30011 | 49543 | 20447 | 30490 | 49455 | 20054 | 237.59  | 157.77  |
| 100000 | 1.09 | 0.55 | 0.45 | 32973 | 49500 | 20250 | 46.27  | 0.5478 | 0.5522 | 0.4478 | 0.4522 | 30011 | 49543 | 20447 | 30490 | 49455 | 20054 | 294.25  | 204.02  |
| 100000 | 1.10 | 0.55 | 0.45 | 33275 | 49500 | 20250 | 56.70  | 0.5478 | 0.5522 | 0.4478 | 0.4522 | 30011 | 49543 | 20447 | 30490 | 49455 | 20054 | 357.01  | 256.28  |
| 100000 | 1.11 | 0.55 | 0.45 | 33578 | 49500 | 20250 | 68.10  | 0.5478 | 0.5522 | 0.4478 | 0.4522 | 30011 | 49543 | 20447 | 30490 | 49455 | 20054 | 425.86  | 314.53  |
| 100000 | 1.12 | 0.55 | 0.45 | 33880 | 49500 | 20250 | 80.44  | 0.5478 | 0.5522 | 0.4478 | 0.4522 | 30011 | 49543 | 20447 | 30490 | 49455 | 20054 | 500.82  | 378.79  |
| 100000 | 1.13 | 0.55 | 0.45 | 34183 | 49500 | 20250 | 93.71  | 0.5478 | 0.5522 | 0.4478 | 0.4522 | 30011 | 49543 | 20447 | 30490 | 49455 | 20054 | 581.87  | 449.05  |
| 100000 | 1.14 | 0.55 | 0.45 | 34485 | 49500 | 20250 | 107.89 | 0.5478 | 0.5522 | 0.4478 | 0.4522 | 30011 | 49543 | 20447 | 30490 | 49455 | 20054 | 669.02  | 525.31  |
| 100000 | 1.15 | 0.55 | 0.45 | 34788 | 49500 | 20250 | 122.96 | 0.5478 | 0.5522 | 0.4478 | 0.4522 | 30011 | 49543 | 20447 | 30490 | 49455 | 20054 | 762.27  | 607.58  |
| 100000 | 1.16 | 0.55 | 0.45 | 35090 | 49500 | 20250 | 138.89 | 0.5478 | 0.5522 | 0.4478 | 0.4522 | 30011 | 49543 | 20447 | 30490 | 49455 | 20054 | 861.62  | 695.85  |
| 100000 | 1.17 | 0.55 | 0.45 | 35393 | 49500 | 20250 | 155.66 | 0.5478 | 0.5522 | 0.4478 | 0.4522 | 30011 | 49543 | 20447 | 30490 | 49455 | 20054 | 967.07  | 790.12  |
| 100000 | 1.18 | 0.55 | 0.45 | 35695 | 49500 | 20250 | 173.27 | 0.5478 | 0.5522 | 0.4478 | 0.4522 | 30011 | 49543 | 20447 | 30490 | 49455 | 20054 | 1078.61 | 890.39  |
| 100000 | 1.19 | 0.55 | 0.45 | 35998 | 49500 | 20250 | 191.69 | 0.5478 | 0.5522 | 0.4478 | 0.4522 | 30011 | 49543 | 20447 | 30490 | 49455 | 20054 | 1196.26 | 996.66  |
| 100000 | 1.20 | 0.55 | 0.45 | 36300 | 49500 | 20250 | 210.90 | 0.5478 | 0.5522 | 0.4478 | 0.4522 | 30011 | 49543 | 20447 | 30490 | 49455 | 20054 | 1320.00 | 1108.94 |
| 100000 | 0.80 | 0.6  | 0.4  | 28800 | 48000 | 16000 | 276.10 | 0.5979 | 0.6021 | 0.3979 | 0.4021 | 35743 | 48085 | 16172 | 36258 | 47913 | 15829 | 1350.58 | 1536.11 |
| 100000 | 0.81 | 0.6  | 0.4  | 29160 | 48000 | 16000 | 246.77 | 0.5979 | 0.6021 | 0.3979 | 0.4021 | 35743 | 48085 | 16172 | 36258 | 47913 | 15829 | 1214.35 | 1391.58 |
| 100000 | 0.82 | 0.6  | 0.4  | 29520 | 48000 | 16000 | 219.35 | 0.5979 | 0.6021 | 0.3979 | 0.4021 | 35743 | 48085 | 16172 | 36258 | 47913 | 15829 | 1085.37 | 1254.20 |
| 100000 | 0.83 | 0.6  | 0.4  | 29880 | 48000 | 16000 | 193.79 | 0.5979 | 0.6021 | 0.3979 | 0.4021 | 35743 | 48085 | 16172 | 36258 | 47913 | 15829 | 963.65  | 1123.97 |
| 100000 | 0.84 | 0.6  | 0.4  | 30240 | 48000 | 16000 | 170.04 | 0.5979 | 0.6021 | 0.3979 | 0.4021 | 35743 | 48085 | 16172 | 36258 | 47913 | 15829 | 849.17  | 1000.90 |
| 100000 | 0.85 | 0.6  | 0.4  | 30600 | 48000 | 16000 | 148.05 | 0.5979 | 0.6021 | 0.3979 | 0.4021 | 35743 | 48085 | 16172 | 36258 | 47913 | 15829 | 741.95  | 884.96  |

|        |      |     |     |       |       |       |        |        |        |        |        |       |       |       |       |       |       |         |         |
|--------|------|-----|-----|-------|-------|-------|--------|--------|--------|--------|--------|-------|-------|-------|-------|-------|-------|---------|---------|
| 100000 | 0.86 | 0.6 | 0.4 | 30960 | 48000 | 16000 | 127.77 | 0.5979 | 0.6021 | 0.3979 | 0.4021 | 35743 | 48085 | 16172 | 36258 | 47913 | 15829 | 641.98  | 776.18  |
| 100000 | 0.87 | 0.6 | 0.4 | 31320 | 48000 | 16000 | 109.15 | 0.5979 | 0.6021 | 0.3979 | 0.4021 | 35743 | 48085 | 16172 | 36258 | 47913 | 15829 | 549.26  | 674.55  |
| 100000 | 0.88 | 0.6 | 0.4 | 31680 | 48000 | 16000 | 92.15  | 0.5979 | 0.6021 | 0.3979 | 0.4021 | 35743 | 48085 | 16172 | 36258 | 47913 | 15829 | 463.80  | 580.06  |
| 100000 | 0.89 | 0.6 | 0.4 | 32040 | 48000 | 16000 | 76.73  | 0.5979 | 0.6021 | 0.3979 | 0.4021 | 35743 | 48085 | 16172 | 36258 | 47913 | 15829 | 385.58  | 492.73  |
| 100000 | 0.90 | 0.6 | 0.4 | 32400 | 48000 | 16000 | 62.84  | 0.5979 | 0.6021 | 0.3979 | 0.4021 | 35743 | 48085 | 16172 | 36258 | 47913 | 15829 | 314.62  | 412.54  |
| 100000 | 0.91 | 0.6 | 0.4 | 32760 | 48000 | 16000 | 50.45  | 0.5979 | 0.6021 | 0.3979 | 0.4021 | 35743 | 48085 | 16172 | 36258 | 47913 | 15829 | 250.91  | 339.50  |
| 100000 | 0.92 | 0.6 | 0.4 | 33120 | 48000 | 16000 | 39.50  | 0.5979 | 0.6021 | 0.3979 | 0.4021 | 35743 | 48085 | 16172 | 36258 | 47913 | 15829 | 194.45  | 273.61  |
| 100000 | 0.93 | 0.6 | 0.4 | 33480 | 48000 | 16000 | 29.98  | 0.5979 | 0.6021 | 0.3979 | 0.4021 | 35743 | 48085 | 16172 | 36258 | 47913 | 15829 | 145.24  | 214.87  |
| 100000 | 0.94 | 0.6 | 0.4 | 33840 | 48000 | 16000 | 21.83  | 0.5979 | 0.6021 | 0.3979 | 0.4021 | 35743 | 48085 | 16172 | 36258 | 47913 | 15829 | 103.28  | 163.28  |
| 100000 | 0.95 | 0.6 | 0.4 | 34200 | 48000 | 16000 | 15.03  | 0.5979 | 0.6021 | 0.3979 | 0.4021 | 35743 | 48085 | 16172 | 36258 | 47913 | 15829 | 68.58   | 118.84  |
| 100000 | 0.96 | 0.6 | 0.4 | 34560 | 48000 | 16000 | 9.54   | 0.5979 | 0.6021 | 0.3979 | 0.4021 | 35743 | 48085 | 16172 | 36258 | 47913 | 15829 | 41.13   | 81.54   |
| 100000 | 0.97 | 0.6 | 0.4 | 34920 | 48000 | 16000 | 5.32   | 0.5979 | 0.6021 | 0.3979 | 0.4021 | 35743 | 48085 | 16172 | 36258 | 47913 | 15829 | 20.93   | 51.39   |
| 100000 | 0.98 | 0.6 | 0.4 | 35280 | 48000 | 16000 | 2.34   | 0.5979 | 0.6021 | 0.3979 | 0.4021 | 35743 | 48085 | 16172 | 36258 | 47913 | 15829 | 7.98    | 28.40   |
| 100000 | 0.99 | 0.6 | 0.4 | 35640 | 48000 | 16000 | 0.58   | 0.5979 | 0.6021 | 0.3979 | 0.4021 | 35743 | 48085 | 16172 | 36258 | 47913 | 15829 | 2.28    | 12.55   |
| 100000 | 1.00 | 0.6 | 0.4 | 36000 | 48000 | 16000 | 0.00   | 0.5979 | 0.6021 | 0.3979 | 0.4021 | 35743 | 48085 | 16172 | 36258 | 47913 | 15829 | 3.83    | 3.85    |
| 100000 | 1.01 | 0.6 | 0.4 | 36360 | 48000 | 16000 | 0.57   | 0.5979 | 0.6021 | 0.3979 | 0.4021 | 35743 | 48085 | 16172 | 36258 | 47913 | 15829 | 12.64   | 2.30    |
| 100000 | 1.02 | 0.6 | 0.4 | 36720 | 48000 | 16000 | 2.27   | 0.5979 | 0.6021 | 0.3979 | 0.4021 | 35743 | 48085 | 16172 | 36258 | 47913 | 15829 | 28.70   | 7.90    |
| 100000 | 1.03 | 0.6 | 0.4 | 37080 | 48000 | 16000 | 5.06   | 0.5979 | 0.6021 | 0.3979 | 0.4021 | 35743 | 48085 | 16172 | 36258 | 47913 | 15829 | 52.01   | 20.64   |
| 100000 | 1.04 | 0.6 | 0.4 | 37440 | 48000 | 16000 | 8.92   | 0.5979 | 0.6021 | 0.3979 | 0.4021 | 35743 | 48085 | 16172 | 36258 | 47913 | 15829 | 82.57   | 40.54   |
| 100000 | 1.05 | 0.6 | 0.4 | 37800 | 48000 | 16000 | 13.82  | 0.5979 | 0.6021 | 0.3979 | 0.4021 | 35743 | 48085 | 16172 | 36258 | 47913 | 15829 | 120.39  | 67.58   |
| 100000 | 1.06 | 0.6 | 0.4 | 38160 | 48000 | 16000 | 19.74  | 0.5979 | 0.6021 | 0.3979 | 0.4021 | 35743 | 48085 | 16172 | 36258 | 47913 | 15829 | 165.45  | 101.77  |
| 100000 | 1.07 | 0.6 | 0.4 | 38520 | 48000 | 16000 | 26.65  | 0.5979 | 0.6021 | 0.3979 | 0.4021 | 35743 | 48085 | 16172 | 36258 | 47913 | 15829 | 217.77  | 143.11  |
| 100000 | 1.08 | 0.6 | 0.4 | 38880 | 48000 | 16000 | 34.53  | 0.5979 | 0.6021 | 0.3979 | 0.4021 | 35743 | 48085 | 16172 | 36258 | 47913 | 15829 | 277.34  | 191.60  |
| 100000 | 1.09 | 0.6 | 0.4 | 39240 | 48000 | 16000 | 43.36  | 0.5979 | 0.6021 | 0.3979 | 0.4021 | 35743 | 48085 | 16172 | 36258 | 47913 | 15829 | 344.16  | 247.24  |
| 100000 | 1.10 | 0.6 | 0.4 | 39600 | 48000 | 16000 | 53.11  | 0.5979 | 0.6021 | 0.3979 | 0.4021 | 35743 | 48085 | 16172 | 36258 | 47913 | 15829 | 418.23  | 310.03  |
| 100000 | 1.11 | 0.6 | 0.4 | 39960 | 48000 | 16000 | 63.76  | 0.5979 | 0.6021 | 0.3979 | 0.4021 | 35743 | 48085 | 16172 | 36258 | 47913 | 15829 | 499.56  | 379.97  |
| 100000 | 1.12 | 0.6 | 0.4 | 40320 | 48000 | 16000 | 75.29  | 0.5979 | 0.6021 | 0.3979 | 0.4021 | 35743 | 48085 | 16172 | 36258 | 47913 | 15829 | 588.13  | 457.05  |
| 100000 | 1.13 | 0.6 | 0.4 | 40680 | 48000 | 16000 | 87.69  | 0.5979 | 0.6021 | 0.3979 | 0.4021 | 35743 | 48085 | 16172 | 36258 | 47913 | 15829 | 683.96  | 541.29  |
| 100000 | 1.14 | 0.6 | 0.4 | 41040 | 48000 | 16000 | 100.92 | 0.5979 | 0.6021 | 0.3979 | 0.4021 | 35743 | 48085 | 16172 | 36258 | 47913 | 15829 | 787.04  | 632.67  |
| 100000 | 1.15 | 0.6 | 0.4 | 41400 | 48000 | 16000 | 114.97 | 0.5979 | 0.6021 | 0.3979 | 0.4021 | 35743 | 48085 | 16172 | 36258 | 47913 | 15829 | 897.37  | 731.20  |
| 100000 | 1.16 | 0.6 | 0.4 | 41760 | 48000 | 16000 | 129.83 | 0.5979 | 0.6021 | 0.3979 | 0.4021 | 35743 | 48085 | 16172 | 36258 | 47913 | 15829 | 1014.96 | 836.88  |
| 100000 | 1.17 | 0.6 | 0.4 | 42120 | 48000 | 16000 | 145.46 | 0.5979 | 0.6021 | 0.3979 | 0.4021 | 35743 | 48085 | 16172 | 36258 | 47913 | 15829 | 1139.79 | 949.71  |
| 100000 | 1.18 | 0.6 | 0.4 | 42480 | 48000 | 16000 | 161.87 | 0.5979 | 0.6021 | 0.3979 | 0.4021 | 35743 | 48085 | 16172 | 36258 | 47913 | 15829 | 1271.88 | 1069.69 |
| 100000 | 1.19 | 0.6 | 0.4 | 42840 | 48000 | 16000 | 179.02 | 0.5979 | 0.6021 | 0.3979 | 0.4021 | 35743 | 48085 | 16172 | 36258 | 47913 | 15829 | 1411.22 | 1196.81 |
| 100000 | 1.20 | 0.6 | 0.4 | 43200 | 48000 | 16000 | 196.90 | 0.5979 | 0.6021 | 0.3979 | 0.4021 | 35743 | 48085 | 16172 | 36258 | 47913 | 15829 | 1557.81 | 1331.09 |

|        |      |      |      |       |       |       |        |        |        |        |        |       |       |       |       |       |       |         |         |
|--------|------|------|------|-------|-------|-------|--------|--------|--------|--------|--------|-------|-------|-------|-------|-------|-------|---------|---------|
| 100000 | 0.80 | 0.65 | 0.35 | 33800 | 45500 | 12250 | 250.40 | 0.6479 | 0.6521 | 0.3479 | 0.3521 | 41979 | 45625 | 12397 | 42522 | 45374 | 12104 | 1595.53 | 1791.21 |
| 100000 | 0.81 | 0.65 | 0.35 | 34223 | 45500 | 12250 | 223.68 | 0.6479 | 0.6521 | 0.3479 | 0.3521 | 41979 | 45625 | 12397 | 42522 | 45374 | 12104 | 1435.15 | 1622.08 |
| 100000 | 0.82 | 0.65 | 0.35 | 34645 | 45500 | 12250 | 198.72 | 0.6479 | 0.6521 | 0.3479 | 0.3521 | 41979 | 45625 | 12397 | 42522 | 45374 | 12104 | 1283.27 | 1461.35 |
| 100000 | 0.83 | 0.65 | 0.35 | 35068 | 45500 | 12250 | 175.47 | 0.6479 | 0.6521 | 0.3479 | 0.3521 | 41979 | 45625 | 12397 | 42522 | 45374 | 12104 | 1139.90 | 1309.01 |
| 100000 | 0.84 | 0.65 | 0.35 | 35490 | 45500 | 12250 | 153.88 | 0.6479 | 0.6521 | 0.3479 | 0.3521 | 41979 | 45625 | 12397 | 42522 | 45374 | 12104 | 1005.04 | 1165.07 |
| 100000 | 0.85 | 0.65 | 0.35 | 35913 | 45500 | 12250 | 133.91 | 0.6479 | 0.6521 | 0.3479 | 0.3521 | 41979 | 45625 | 12397 | 42522 | 45374 | 12104 | 878.68  | 1029.53 |
| 100000 | 0.86 | 0.65 | 0.35 | 36335 | 45500 | 12250 | 115.51 | 0.6479 | 0.6521 | 0.3479 | 0.3521 | 41979 | 45625 | 12397 | 42522 | 45374 | 12104 | 760.82  | 902.38  |
| 100000 | 0.87 | 0.65 | 0.35 | 36758 | 45500 | 12250 | 98.63  | 0.6479 | 0.6521 | 0.3479 | 0.3521 | 41979 | 45625 | 12397 | 42522 | 45374 | 12104 | 651.47  | 783.62  |
| 100000 | 0.88 | 0.65 | 0.35 | 37180 | 45500 | 12250 | 83.23  | 0.6479 | 0.6521 | 0.3479 | 0.3521 | 41979 | 45625 | 12397 | 42522 | 45374 | 12104 | 550.63  | 673.27  |
| 100000 | 0.89 | 0.65 | 0.35 | 37603 | 45500 | 12250 | 69.27  | 0.6479 | 0.6521 | 0.3479 | 0.3521 | 41979 | 45625 | 12397 | 42522 | 45374 | 12104 | 458.28  | 571.30  |
| 100000 | 0.90 | 0.65 | 0.35 | 38025 | 45500 | 12250 | 56.70  | 0.6479 | 0.6521 | 0.3479 | 0.3521 | 41979 | 45625 | 12397 | 42522 | 45374 | 12104 | 374.45  | 477.74  |
| 100000 | 0.91 | 0.65 | 0.35 | 38448 | 45500 | 12250 | 45.50  | 0.6479 | 0.6521 | 0.3479 | 0.3521 | 41979 | 45625 | 12397 | 42522 | 45374 | 12104 | 299.12  | 392.57  |
| 100000 | 0.92 | 0.65 | 0.35 | 38870 | 45500 | 12250 | 35.61  | 0.6479 | 0.6521 | 0.3479 | 0.3521 | 41979 | 45625 | 12397 | 42522 | 45374 | 12104 | 232.29  | 315.79  |
| 100000 | 0.93 | 0.65 | 0.35 | 39293 | 45500 | 12250 | 27.01  | 0.6479 | 0.6521 | 0.3479 | 0.3521 | 41979 | 45625 | 12397 | 42522 | 45374 | 12104 | 173.96  | 247.41  |
| 100000 | 0.94 | 0.65 | 0.35 | 39715 | 45500 | 12250 | 19.66  | 0.6479 | 0.6521 | 0.3479 | 0.3521 | 41979 | 45625 | 12397 | 42522 | 45374 | 12104 | 124.15  | 187.43  |
| 100000 | 0.95 | 0.65 | 0.35 | 40138 | 45500 | 12250 | 13.53  | 0.6479 | 0.6521 | 0.3479 | 0.3521 | 41979 | 45625 | 12397 | 42522 | 45374 | 12104 | 82.83   | 135.85  |
| 100000 | 0.96 | 0.65 | 0.35 | 40560 | 45500 | 12250 | 8.58   | 0.6479 | 0.6521 | 0.3479 | 0.3521 | 41979 | 45625 | 12397 | 42522 | 45374 | 12104 | 50.02   | 92.66   |
| 100000 | 0.97 | 0.65 | 0.35 | 40983 | 45500 | 12250 | 4.78   | 0.6479 | 0.6521 | 0.3479 | 0.3521 | 41979 | 45625 | 12397 | 42522 | 45374 | 12104 | 25.72   | 57.86   |
| 100000 | 0.98 | 0.65 | 0.35 | 41405 | 45500 | 12250 | 2.11   | 0.6479 | 0.6521 | 0.3479 | 0.3521 | 41979 | 45625 | 12397 | 42522 | 45374 | 12104 | 9.92    | 31.46   |
| 100000 | 0.99 | 0.65 | 0.35 | 41828 | 45500 | 12250 | 0.52   | 0.6479 | 0.6521 | 0.3479 | 0.3521 | 41979 | 45625 | 12397 | 42522 | 45374 | 12104 | 2.62    | 13.46   |
| 100000 | 1.00 | 0.65 | 0.35 | 42250 | 45500 | 12250 | 0.00   | 0.6479 | 0.6521 | 0.3479 | 0.3521 | 41979 | 45625 | 12397 | 42522 | 45374 | 12104 | 3.83    | 3.85    |
| 100000 | 1.01 | 0.65 | 0.35 | 42673 | 45500 | 12250 | 0.51   | 0.6479 | 0.6521 | 0.3479 | 0.3521 | 41979 | 45625 | 12397 | 42522 | 45374 | 12104 | 13.54   | 2.64    |
| 100000 | 1.02 | 0.65 | 0.35 | 43095 | 45500 | 12250 | 2.03   | 0.6479 | 0.6521 | 0.3479 | 0.3521 | 41979 | 45625 | 12397 | 42522 | 45374 | 12104 | 31.76   | 9.83    |
| 100000 | 1.03 | 0.65 | 0.35 | 43518 | 45500 | 12250 | 4.54   | 0.6479 | 0.6521 | 0.3479 | 0.3521 | 41979 | 45625 | 12397 | 42522 | 45374 | 12104 | 58.49   | 25.41   |
| 100000 | 1.04 | 0.65 | 0.35 | 43940 | 45500 | 12250 | 8.00   | 0.6479 | 0.6521 | 0.3479 | 0.3521 | 41979 | 45625 | 12397 | 42522 | 45374 | 12104 | 93.71   | 49.38   |
| 100000 | 1.05 | 0.65 | 0.35 | 44363 | 45500 | 12250 | 12.39  | 0.6479 | 0.6521 | 0.3479 | 0.3521 | 41979 | 45625 | 12397 | 42522 | 45374 | 12104 | 137.45  | 81.76   |
| 100000 | 1.06 | 0.65 | 0.35 | 44785 | 45500 | 12250 | 17.70  | 0.6479 | 0.6521 | 0.3479 | 0.3521 | 41979 | 45625 | 12397 | 42522 | 45374 | 12104 | 189.68  | 122.52  |
| 100000 | 1.07 | 0.65 | 0.35 | 45208 | 45500 | 12250 | 23.89  | 0.6479 | 0.6521 | 0.3479 | 0.3521 | 41979 | 45625 | 12397 | 42522 | 45374 | 12104 | 250.42  | 171.69  |
| 100000 | 1.08 | 0.65 | 0.35 | 45630 | 45500 | 12250 | 30.94  | 0.6479 | 0.6521 | 0.3479 | 0.3521 | 41979 | 45625 | 12397 | 42522 | 45374 | 12104 | 319.67  | 229.25  |
| 100000 | 1.09 | 0.65 | 0.35 | 46053 | 45500 | 12250 | 38.84  | 0.6479 | 0.6521 | 0.3479 | 0.3521 | 41979 | 45625 | 12397 | 42522 | 45374 | 12104 | 397.42  | 295.21  |
| 100000 | 1.10 | 0.65 | 0.35 | 46475 | 45500 | 12250 | 47.56  | 0.6479 | 0.6521 | 0.3479 | 0.3521 | 41979 | 45625 | 12397 | 42522 | 45374 | 12104 | 483.68  | 369.56  |
| 100000 | 1.11 | 0.65 | 0.35 | 46898 | 45500 | 12250 | 57.08  | 0.6479 | 0.6521 | 0.3479 | 0.3521 | 41979 | 45625 | 12397 | 42522 | 45374 | 12104 | 578.44  | 452.31  |
| 100000 | 1.12 | 0.65 | 0.35 | 47320 | 45500 | 12250 | 67.39  | 0.6479 | 0.6521 | 0.3479 | 0.3521 | 41979 | 45625 | 12397 | 42522 | 45374 | 12104 | 681.70  | 543.45  |
| 100000 | 1.13 | 0.65 | 0.35 | 47743 | 45500 | 12250 | 78.45  | 0.6479 | 0.6521 | 0.3479 | 0.3521 | 41979 | 45625 | 12397 | 42522 | 45374 | 12104 | 793.47  | 642.99  |
| 100000 | 1.14 | 0.65 | 0.35 | 48165 | 45500 | 12250 | 90.27  | 0.6479 | 0.6521 | 0.3479 | 0.3521 | 41979 | 45625 | 12397 | 42522 | 45374 | 12104 | 913.74  | 750.93  |

|        |      |      |      |       |       |       |        |        |        |        |        |       |       |       |       |       |       |         |         |
|--------|------|------|------|-------|-------|-------|--------|--------|--------|--------|--------|-------|-------|-------|-------|-------|-------|---------|---------|
| 100000 | 1.15 | 0.65 | 0.35 | 48588 | 45500 | 12250 | 102.81 | 0.6479 | 0.6521 | 0.3479 | 0.3521 | 41979 | 45625 | 12397 | 42522 | 45374 | 12104 | 1042.52 | 867.26  |
| 100000 | 1.16 | 0.65 | 0.35 | 49010 | 45500 | 12250 | 116.06 | 0.6479 | 0.6521 | 0.3479 | 0.3521 | 41979 | 45625 | 12397 | 42522 | 45374 | 12104 | 1179.80 | 991.99  |
| 100000 | 1.17 | 0.65 | 0.35 | 49433 | 45500 | 12250 | 130.00 | 0.6479 | 0.6521 | 0.3479 | 0.3521 | 41979 | 45625 | 12397 | 42522 | 45374 | 12104 | 1325.59 | 1125.11 |
| 100000 | 1.18 | 0.65 | 0.35 | 49855 | 45500 | 12250 | 144.62 | 0.6479 | 0.6521 | 0.3479 | 0.3521 | 41979 | 45625 | 12397 | 42522 | 45374 | 12104 | 1479.88 | 1266.63 |
| 100000 | 1.19 | 0.65 | 0.35 | 50278 | 45500 | 12250 | 159.90 | 0.6479 | 0.6521 | 0.3479 | 0.3521 | 41979 | 45625 | 12397 | 42522 | 45374 | 12104 | 1642.68 | 1416.54 |
| 100000 | 1.20 | 0.65 | 0.35 | 50700 | 45500 | 12250 | 175.83 | 0.6479 | 0.6521 | 0.3479 | 0.3521 | 41979 | 45625 | 12397 | 42522 | 45374 | 12104 | 1813.98 | 1574.86 |
| 100000 | 0.80 | 0.7  | 0.3  | 39200 | 42000 | 9000  | 215.13 | 0.6980 | 0.7020 | 0.2980 | 0.3020 | 48719 | 42160 | 9121  | 49282 | 41839 | 8880  | 1862.17 | 2064.65 |
| 100000 | 0.81 | 0.7  | 0.3  | 39690 | 42000 | 9000  | 192.07 | 0.6980 | 0.7020 | 0.2980 | 0.3020 | 48719 | 42160 | 9121  | 49282 | 41839 | 8880  | 1675.61 | 1869.04 |
| 100000 | 0.82 | 0.7  | 0.3  | 40180 | 42000 | 9000  | 170.55 | 0.6980 | 0.7020 | 0.2980 | 0.3020 | 48719 | 42160 | 9121  | 49282 | 41839 | 8880  | 1498.92 | 1683.17 |
| 100000 | 0.83 | 0.7  | 0.3  | 40670 | 42000 | 9000  | 150.53 | 0.6980 | 0.7020 | 0.2980 | 0.3020 | 48719 | 42160 | 9121  | 49282 | 41839 | 8880  | 1332.08 | 1507.06 |
| 100000 | 0.84 | 0.7  | 0.3  | 41160 | 42000 | 9000  | 131.95 | 0.6980 | 0.7020 | 0.2980 | 0.3020 | 48719 | 42160 | 9121  | 49282 | 41839 | 8880  | 1175.09 | 1340.68 |
| 100000 | 0.85 | 0.7  | 0.3  | 41650 | 42000 | 9000  | 114.77 | 0.6980 | 0.7020 | 0.2980 | 0.3020 | 48719 | 42160 | 9121  | 49282 | 41839 | 8880  | 1027.96 | 1184.05 |
| 100000 | 0.86 | 0.7  | 0.3  | 42140 | 42000 | 9000  | 98.95  | 0.6980 | 0.7020 | 0.2980 | 0.3020 | 48719 | 42160 | 9121  | 49282 | 41839 | 8880  | 890.69  | 1037.16 |
| 100000 | 0.87 | 0.7  | 0.3  | 42630 | 42000 | 9000  | 84.45  | 0.6980 | 0.7020 | 0.2980 | 0.3020 | 48719 | 42160 | 9121  | 49282 | 41839 | 8880  | 763.28  | 900.02  |
| 100000 | 0.88 | 0.7  | 0.3  | 43120 | 42000 | 9000  | 71.23  | 0.6980 | 0.7020 | 0.2980 | 0.3020 | 48719 | 42160 | 9121  | 49282 | 41839 | 8880  | 645.72  | 772.62  |
| 100000 | 0.89 | 0.7  | 0.3  | 43610 | 42000 | 9000  | 59.26  | 0.6980 | 0.7020 | 0.2980 | 0.3020 | 48719 | 42160 | 9121  | 49282 | 41839 | 8880  | 538.02  | 654.96  |
| 100000 | 0.90 | 0.7  | 0.3  | 44100 | 42000 | 9000  | 48.49  | 0.6980 | 0.7020 | 0.2980 | 0.3020 | 48719 | 42160 | 9121  | 49282 | 41839 | 8880  | 440.17  | 547.05  |
| 100000 | 0.91 | 0.7  | 0.3  | 44590 | 42000 | 9000  | 38.89  | 0.6980 | 0.7020 | 0.2980 | 0.3020 | 48719 | 42160 | 9121  | 49282 | 41839 | 8880  | 352.18  | 448.88  |
| 100000 | 0.92 | 0.7  | 0.3  | 45080 | 42000 | 9000  | 30.43  | 0.6980 | 0.7020 | 0.2980 | 0.3020 | 48719 | 42160 | 9121  | 49282 | 41839 | 8880  | 274.05  | 360.46  |
| 100000 | 0.93 | 0.7  | 0.3  | 45570 | 42000 | 9000  | 23.07  | 0.6980 | 0.7020 | 0.2980 | 0.3020 | 48719 | 42160 | 9121  | 49282 | 41839 | 8880  | 205.78  | 281.78  |
| 100000 | 0.94 | 0.7  | 0.3  | 46060 | 42000 | 9000  | 16.79  | 0.6980 | 0.7020 | 0.2980 | 0.3020 | 48719 | 42160 | 9121  | 49282 | 41839 | 8880  | 147.36  | 212.85  |
| 100000 | 0.95 | 0.7  | 0.3  | 46550 | 42000 | 9000  | 11.55  | 0.6980 | 0.7020 | 0.2980 | 0.3020 | 48719 | 42160 | 9121  | 49282 | 41839 | 8880  | 98.79   | 153.65  |
| 100000 | 0.96 | 0.7  | 0.3  | 47040 | 42000 | 9000  | 7.32   | 0.6980 | 0.7020 | 0.2980 | 0.3020 | 48719 | 42160 | 9121  | 49282 | 41839 | 8880  | 60.09   | 104.21  |
| 100000 | 0.97 | 0.7  | 0.3  | 47530 | 42000 | 9000  | 4.08   | 0.6980 | 0.7020 | 0.2980 | 0.3020 | 48719 | 42160 | 9121  | 49282 | 41839 | 8880  | 31.24   | 64.50   |
| 100000 | 0.98 | 0.7  | 0.3  | 48020 | 42000 | 9000  | 1.80   | 0.6980 | 0.7020 | 0.2980 | 0.3020 | 48719 | 42160 | 9121  | 49282 | 41839 | 8880  | 12.24   | 34.54   |
| 100000 | 0.99 | 0.7  | 0.3  | 48510 | 42000 | 9000  | 0.45   | 0.6980 | 0.7020 | 0.2980 | 0.3020 | 48719 | 42160 | 9121  | 49282 | 41839 | 8880  | 3.11    | 14.33   |
| 100000 | 1.00 | 0.7  | 0.3  | 49000 | 42000 | 9000  | 0.00   | 0.6980 | 0.7020 | 0.2980 | 0.3020 | 48719 | 42160 | 9121  | 49282 | 41839 | 8880  | 3.83    | 3.86    |
| 100000 | 1.01 | 0.7  | 0.3  | 49490 | 42000 | 9000  | 0.44   | 0.6980 | 0.7020 | 0.2980 | 0.3020 | 48719 | 42160 | 9121  | 49282 | 41839 | 8880  | 14.40   | 3.13    |
| 100000 | 1.02 | 0.7  | 0.3  | 49980 | 42000 | 9000  | 1.73   | 0.6980 | 0.7020 | 0.2980 | 0.3020 | 48719 | 42160 | 9121  | 49282 | 41839 | 8880  | 34.84   | 12.15   |
| 100000 | 1.03 | 0.7  | 0.3  | 50470 | 42000 | 9000  | 3.86   | 0.6980 | 0.7020 | 0.2980 | 0.3020 | 48719 | 42160 | 9121  | 49282 | 41839 | 8880  | 65.12   | 30.91   |
| 100000 | 1.04 | 0.7  | 0.3  | 50960 | 42000 | 9000  | 6.81   | 0.6980 | 0.7020 | 0.2980 | 0.3020 | 48719 | 42160 | 9121  | 49282 | 41839 | 8880  | 105.27  | 59.41   |
| 100000 | 1.05 | 0.7  | 0.3  | 51450 | 42000 | 9000  | 10.54  | 0.6980 | 0.7020 | 0.2980 | 0.3020 | 48719 | 42160 | 9121  | 49282 | 41839 | 8880  | 155.27  | 97.66   |
| 100000 | 1.06 | 0.7  | 0.3  | 51940 | 42000 | 9000  | 15.05  | 0.6980 | 0.7020 | 0.2980 | 0.3020 | 48719 | 42160 | 9121  | 49282 | 41839 | 8880  | 215.13  | 145.65  |
| 100000 | 1.07 | 0.7  | 0.3  | 52430 | 42000 | 9000  | 20.31  | 0.6980 | 0.7020 | 0.2980 | 0.3020 | 48719 | 42160 | 9121  | 49282 | 41839 | 8880  | 284.85  | 203.39  |
| 100000 | 1.08 | 0.7  | 0.3  | 52920 | 42000 | 9000  | 26.30  | 0.6980 | 0.7020 | 0.2980 | 0.3020 | 48719 | 42160 | 9121  | 49282 | 41839 | 8880  | 364.42  | 270.87  |

|        |      |      |      |       |       |      |        |        |        |        |        |       |       |      |       |       |      |         |         |
|--------|------|------|------|-------|-------|------|--------|--------|--------|--------|--------|-------|-------|------|-------|-------|------|---------|---------|
| 100000 | 1.09 | 0.7  | 0.3  | 53410 | 42000 | 9000 | 33.01  | 0.6980 | 0.7020 | 0.2980 | 0.3020 | 48719 | 42160 | 9121 | 49282 | 41839 | 8880 | 453.84  | 348.09  |
| 100000 | 1.10 | 0.7  | 0.3  | 53900 | 42000 | 9000 | 40.41  | 0.6980 | 0.7020 | 0.2980 | 0.3020 | 48719 | 42160 | 9121 | 49282 | 41839 | 8880 | 553.13  | 435.06  |
| 100000 | 1.11 | 0.7  | 0.3  | 54390 | 42000 | 9000 | 48.48  | 0.6980 | 0.7020 | 0.2980 | 0.3020 | 48719 | 42160 | 9121 | 49282 | 41839 | 8880 | 662.27  | 531.78  |
| 100000 | 1.12 | 0.7  | 0.3  | 54880 | 42000 | 9000 | 57.22  | 0.6980 | 0.7020 | 0.2980 | 0.3020 | 48719 | 42160 | 9121 | 49282 | 41839 | 8880 | 781.27  | 638.23  |
| 100000 | 1.13 | 0.7  | 0.3  | 55370 | 42000 | 9000 | 66.60  | 0.6980 | 0.7020 | 0.2980 | 0.3020 | 48719 | 42160 | 9121 | 49282 | 41839 | 8880 | 910.12  | 754.43  |
| 100000 | 1.14 | 0.7  | 0.3  | 55860 | 42000 | 9000 | 76.61  | 0.6980 | 0.7020 | 0.2980 | 0.3020 | 48719 | 42160 | 9121 | 49282 | 41839 | 8880 | 1048.83 | 880.38  |
| 100000 | 1.15 | 0.7  | 0.3  | 56350 | 42000 | 9000 | 87.24  | 0.6980 | 0.7020 | 0.2980 | 0.3020 | 48719 | 42160 | 9121 | 49282 | 41839 | 8880 | 1197.40 | 1016.07 |
| 100000 | 1.16 | 0.7  | 0.3  | 56840 | 42000 | 9000 | 98.46  | 0.6980 | 0.7020 | 0.2980 | 0.3020 | 48719 | 42160 | 9121 | 49282 | 41839 | 8880 | 1355.82 | 1161.50 |
| 100000 | 1.17 | 0.7  | 0.3  | 57330 | 42000 | 9000 | 110.26 | 0.6980 | 0.7020 | 0.2980 | 0.3020 | 48719 | 42160 | 9121 | 49282 | 41839 | 8880 | 1524.10 | 1316.68 |
| 100000 | 1.18 | 0.7  | 0.3  | 57820 | 42000 | 9000 | 122.64 | 0.6980 | 0.7020 | 0.2980 | 0.3020 | 48719 | 42160 | 9121 | 49282 | 41839 | 8880 | 1702.24 | 1481.60 |
| 100000 | 1.19 | 0.7  | 0.3  | 58310 | 42000 | 9000 | 135.56 | 0.6980 | 0.7020 | 0.2980 | 0.3020 | 48719 | 42160 | 9121 | 49282 | 41839 | 8880 | 1890.23 | 1656.26 |
| 100000 | 1.20 | 0.7  | 0.3  | 58800 | 42000 | 9000 | 149.04 | 0.6980 | 0.7020 | 0.2980 | 0.3020 | 48719 | 42160 | 9121 | 49282 | 41839 | 8880 | 2088.08 | 1840.67 |
| 100000 | 0.80 | 0.75 | 0.25 | 45000 | 37500 | 6250 | 172.74 | 0.7481 | 0.7519 | 0.2481 | 0.2519 | 55966 | 37689 | 6345 | 56535 | 37310 | 6155 | 2150.95 | 2355.95 |
| 100000 | 0.81 | 0.75 | 0.25 | 45563 | 37500 | 6250 | 154.15 | 0.7481 | 0.7519 | 0.2481 | 0.2519 | 55966 | 37689 | 6345 | 56535 | 37310 | 6155 | 1936.18 | 2132.01 |
| 100000 | 0.82 | 0.75 | 0.25 | 46125 | 37500 | 6250 | 136.82 | 0.7481 | 0.7519 | 0.2481 | 0.2519 | 55966 | 37689 | 6345 | 56535 | 37310 | 6155 | 1732.71 | 1919.26 |
| 100000 | 0.83 | 0.75 | 0.25 | 46688 | 37500 | 6250 | 120.70 | 0.7481 | 0.7519 | 0.2481 | 0.2519 | 55966 | 37689 | 6345 | 56535 | 37310 | 6155 | 1540.55 | 1717.71 |
| 100000 | 0.84 | 0.75 | 0.25 | 47250 | 37500 | 6250 | 105.76 | 0.7481 | 0.7519 | 0.2481 | 0.2519 | 55966 | 37689 | 6345 | 56535 | 37310 | 6155 | 1359.70 | 1527.35 |
| 100000 | 0.85 | 0.75 | 0.25 | 47813 | 37500 | 6250 | 91.95  | 0.7481 | 0.7519 | 0.2481 | 0.2519 | 55966 | 37689 | 6345 | 56535 | 37310 | 6155 | 1190.15 | 1348.18 |
| 100000 | 0.86 | 0.75 | 0.25 | 48375 | 37500 | 6250 | 79.25  | 0.7481 | 0.7519 | 0.2481 | 0.2519 | 55966 | 37689 | 6345 | 56535 | 37310 | 6155 | 1031.91 | 1180.21 |
| 100000 | 0.87 | 0.75 | 0.25 | 48938 | 37500 | 6250 | 67.61  | 0.7481 | 0.7519 | 0.2481 | 0.2519 | 55966 | 37689 | 6345 | 56535 | 37310 | 6155 | 884.98  | 1023.43 |
| 100000 | 0.88 | 0.75 | 0.25 | 49500 | 37500 | 6250 | 57.01  | 0.7481 | 0.7519 | 0.2481 | 0.2519 | 55966 | 37689 | 6345 | 56535 | 37310 | 6155 | 749.36  | 877.84  |
| 100000 | 0.89 | 0.75 | 0.25 | 50063 | 37500 | 6250 | 47.41  | 0.7481 | 0.7519 | 0.2481 | 0.2519 | 55966 | 37689 | 6345 | 56535 | 37310 | 6155 | 625.04  | 743.44  |
| 100000 | 0.90 | 0.75 | 0.25 | 50625 | 37500 | 6250 | 38.78  | 0.7481 | 0.7519 | 0.2481 | 0.2519 | 55966 | 37689 | 6345 | 56535 | 37310 | 6155 | 512.03  | 620.24  |
| 100000 | 0.91 | 0.75 | 0.25 | 51188 | 37500 | 6250 | 31.09  | 0.7481 | 0.7519 | 0.2481 | 0.2519 | 55966 | 37689 | 6345 | 56535 | 37310 | 6155 | 410.33  | 508.23  |
| 100000 | 0.92 | 0.75 | 0.25 | 51750 | 37500 | 6250 | 24.32  | 0.7481 | 0.7519 | 0.2481 | 0.2519 | 55966 | 37689 | 6345 | 56535 | 37310 | 6155 | 319.93  | 407.42  |
| 100000 | 0.93 | 0.75 | 0.25 | 52313 | 37500 | 6250 | 18.43  | 0.7481 | 0.7519 | 0.2481 | 0.2519 | 55966 | 37689 | 6345 | 56535 | 37310 | 6155 | 240.84  | 317.80  |
| 100000 | 0.94 | 0.75 | 0.25 | 52875 | 37500 | 6250 | 13.41  | 0.7481 | 0.7519 | 0.2481 | 0.2519 | 55966 | 37689 | 6345 | 56535 | 37310 | 6155 | 173.06  | 239.37  |
| 100000 | 0.95 | 0.75 | 0.25 | 53438 | 37500 | 6250 | 9.22   | 0.7481 | 0.7519 | 0.2481 | 0.2519 | 55966 | 37689 | 6345 | 56535 | 37310 | 6155 | 116.59  | 172.14  |
| 100000 | 0.96 | 0.75 | 0.25 | 54000 | 37500 | 6250 | 5.84   | 0.7481 | 0.7519 | 0.2481 | 0.2519 | 55966 | 37689 | 6345 | 56535 | 37310 | 6155 | 71.42   | 116.09  |
| 100000 | 0.97 | 0.75 | 0.25 | 54563 | 37500 | 6250 | 3.26   | 0.7481 | 0.7519 | 0.2481 | 0.2519 | 55966 | 37689 | 6345 | 56535 | 37310 | 6155 | 37.56   | 71.25   |
| 100000 | 0.98 | 0.75 | 0.25 | 55125 | 37500 | 6250 | 1.43   | 0.7481 | 0.7519 | 0.2481 | 0.2519 | 55966 | 37689 | 6345 | 56535 | 37310 | 6155 | 15.01   | 37.59   |
| 100000 | 0.99 | 0.75 | 0.25 | 55688 | 37500 | 6250 | 0.35   | 0.7481 | 0.7519 | 0.2481 | 0.2519 | 55966 | 37689 | 6345 | 56535 | 37310 | 6155 | 3.76    | 15.13   |
| 100000 | 1.00 | 0.75 | 0.25 | 56250 | 37500 | 6250 | 0.00   | 0.7481 | 0.7519 | 0.2481 | 0.2519 | 55966 | 37689 | 6345 | 56535 | 37310 | 6155 | 3.82    | 3.86    |
| 100000 | 1.01 | 0.75 | 0.25 | 56813 | 37500 | 6250 | 0.35   | 0.7481 | 0.7519 | 0.2481 | 0.2519 | 55966 | 37689 | 6345 | 56535 | 37310 | 6155 | 15.19   | 3.79    |
| 100000 | 1.02 | 0.75 | 0.25 | 57375 | 37500 | 6250 | 1.38   | 0.7481 | 0.7519 | 0.2481 | 0.2519 | 55966 | 37689 | 6345 | 56535 | 37310 | 6155 | 37.87   | 14.90   |

|        |      |      |      |       |       |      |        |        |        |        |        |       |       |      |       |       |      |         |         |
|--------|------|------|------|-------|-------|------|--------|--------|--------|--------|--------|-------|-------|------|-------|-------|------|---------|---------|
| 100000 | 1.03 | 0.75 | 0.25 | 57938 | 37500 | 6250 | 3.08   | 0.7481 | 0.7519 | 0.2481 | 0.2519 | 55966 | 37689 | 6345 | 56535 | 37310 | 6155 | 71.85   | 37.22   |
| 100000 | 1.04 | 0.75 | 0.25 | 58500 | 37500 | 6250 | 5.42   | 0.7481 | 0.7519 | 0.2481 | 0.2519 | 55966 | 37689 | 6345 | 56535 | 37310 | 6155 | 117.14  | 70.72   |
| 100000 | 1.05 | 0.75 | 0.25 | 59063 | 37500 | 6250 | 8.39   | 0.7481 | 0.7519 | 0.2481 | 0.2519 | 55966 | 37689 | 6345 | 56535 | 37310 | 6155 | 173.74  | 115.42  |
| 100000 | 1.06 | 0.75 | 0.25 | 59625 | 37500 | 6250 | 11.98  | 0.7481 | 0.7519 | 0.2481 | 0.2519 | 55966 | 37689 | 6345 | 56535 | 37310 | 6155 | 241.64  | 171.31  |
| 100000 | 1.07 | 0.75 | 0.25 | 60188 | 37500 | 6250 | 16.16  | 0.7481 | 0.7519 | 0.2481 | 0.2519 | 55966 | 37689 | 6345 | 56535 | 37310 | 6155 | 320.85  | 238.39  |
| 100000 | 1.08 | 0.75 | 0.25 | 60750 | 37500 | 6250 | 20.93  | 0.7481 | 0.7519 | 0.2481 | 0.2519 | 55966 | 37689 | 6345 | 56535 | 37310 | 6155 | 411.37  | 316.67  |
| 100000 | 1.09 | 0.75 | 0.25 | 61313 | 37500 | 6250 | 26.25  | 0.7481 | 0.7519 | 0.2481 | 0.2519 | 55966 | 37689 | 6345 | 56535 | 37310 | 6155 | 513.20  | 406.14  |
| 100000 | 1.10 | 0.75 | 0.25 | 61875 | 37500 | 6250 | 32.13  | 0.7481 | 0.7519 | 0.2481 | 0.2519 | 55966 | 37689 | 6345 | 56535 | 37310 | 6155 | 626.33  | 506.81  |
| 100000 | 1.11 | 0.75 | 0.25 | 62438 | 37500 | 6250 | 38.55  | 0.7481 | 0.7519 | 0.2481 | 0.2519 | 55966 | 37689 | 6345 | 56535 | 37310 | 6155 | 750.77  | 618.67  |
| 100000 | 1.12 | 0.75 | 0.25 | 63000 | 37500 | 6250 | 45.49  | 0.7481 | 0.7519 | 0.2481 | 0.2519 | 55966 | 37689 | 6345 | 56535 | 37310 | 6155 | 886.52  | 741.72  |
| 100000 | 1.13 | 0.75 | 0.25 | 63563 | 37500 | 6250 | 52.93  | 0.7481 | 0.7519 | 0.2481 | 0.2519 | 55966 | 37689 | 6345 | 56535 | 37310 | 6155 | 1033.57 | 875.96  |
| 100000 | 1.14 | 0.75 | 0.25 | 64125 | 37500 | 6250 | 60.88  | 0.7481 | 0.7519 | 0.2481 | 0.2519 | 55966 | 37689 | 6345 | 56535 | 37310 | 6155 | 1191.93 | 1021.40 |
| 100000 | 1.15 | 0.75 | 0.25 | 64688 | 37500 | 6250 | 69.30  | 0.7481 | 0.7519 | 0.2481 | 0.2519 | 55966 | 37689 | 6345 | 56535 | 37310 | 6155 | 1361.60 | 1178.03 |
| 100000 | 1.16 | 0.75 | 0.25 | 65250 | 37500 | 6250 | 78.20  | 0.7481 | 0.7519 | 0.2481 | 0.2519 | 55966 | 37689 | 6345 | 56535 | 37310 | 6155 | 1542.58 | 1345.85 |
| 100000 | 1.17 | 0.75 | 0.25 | 65813 | 37500 | 6250 | 87.56  | 0.7481 | 0.7519 | 0.2481 | 0.2519 | 55966 | 37689 | 6345 | 56535 | 37310 | 6155 | 1734.86 | 1524.87 |
| 100000 | 1.18 | 0.75 | 0.25 | 66375 | 37500 | 6250 | 97.37  | 0.7481 | 0.7519 | 0.2481 | 0.2519 | 55966 | 37689 | 6345 | 56535 | 37310 | 6155 | 1938.45 | 1715.08 |
| 100000 | 1.19 | 0.75 | 0.25 | 66938 | 37500 | 6250 | 107.62 | 0.7481 | 0.7519 | 0.2481 | 0.2519 | 55966 | 37689 | 6345 | 56535 | 37310 | 6155 | 2153.35 | 1916.49 |
| 100000 | 1.20 | 0.75 | 0.25 | 67500 | 37500 | 6250 | 118.30 | 0.7481 | 0.7519 | 0.2481 | 0.2519 | 55966 | 37689 | 6345 | 56535 | 37310 | 6155 | 2379.55 | 2129.08 |
| 100000 | 0.80 | 0.8  | 0.2  | 51200 | 32000 | 4000 | 126.55 | 0.7982 | 0.8018 | 0.1982 | 0.2018 | 63720 | 32210 | 4070 | 64281 | 31789 | 3930 | 2462.51 | 2664.51 |
| 100000 | 0.81 | 0.8  | 0.2  | 51840 | 32000 | 4000 | 112.89 | 0.7982 | 0.8018 | 0.1982 | 0.2018 | 63720 | 32210 | 4070 | 64281 | 31789 | 3930 | 2217.44 | 2410.41 |
| 100000 | 0.82 | 0.8  | 0.2  | 52480 | 32000 | 4000 | 100.16 | 0.7982 | 0.8018 | 0.1982 | 0.2018 | 63720 | 32210 | 4070 | 64281 | 31789 | 3930 | 1985.22 | 2169.06 |
| 100000 | 0.83 | 0.8  | 0.2  | 53120 | 32000 | 4000 | 88.33  | 0.7982 | 0.8018 | 0.1982 | 0.2018 | 63720 | 32210 | 4070 | 64281 | 31789 | 3930 | 1765.87 | 1940.44 |
| 100000 | 0.84 | 0.8  | 0.2  | 53760 | 32000 | 4000 | 77.36  | 0.7982 | 0.8018 | 0.1982 | 0.2018 | 63720 | 32210 | 4070 | 64281 | 31789 | 3930 | 1559.37 | 1724.57 |
| 100000 | 0.85 | 0.8  | 0.2  | 54400 | 32000 | 4000 | 67.24  | 0.7982 | 0.8018 | 0.1982 | 0.2018 | 63720 | 32210 | 4070 | 64281 | 31789 | 3930 | 1365.72 | 1521.45 |
| 100000 | 0.86 | 0.8  | 0.2  | 55040 | 32000 | 4000 | 57.93  | 0.7982 | 0.8018 | 0.1982 | 0.2018 | 63720 | 32210 | 4070 | 64281 | 31789 | 3930 | 1184.94 | 1331.07 |
| 100000 | 0.87 | 0.8  | 0.2  | 55680 | 32000 | 4000 | 49.41  | 0.7982 | 0.8018 | 0.1982 | 0.2018 | 63720 | 32210 | 4070 | 64281 | 31789 | 3930 | 1017.00 | 1153.43 |
| 100000 | 0.88 | 0.8  | 0.2  | 56320 | 32000 | 4000 | 41.64  | 0.7982 | 0.8018 | 0.1982 | 0.2018 | 63720 | 32210 | 4070 | 64281 | 31789 | 3930 | 861.93  | 988.54  |
| 100000 | 0.89 | 0.8  | 0.2  | 56960 | 32000 | 4000 | 34.62  | 0.7982 | 0.8018 | 0.1982 | 0.2018 | 63720 | 32210 | 4070 | 64281 | 31789 | 3930 | 719.71  | 836.39  |
| 100000 | 0.90 | 0.8  | 0.2  | 57600 | 32000 | 4000 | 28.31  | 0.7982 | 0.8018 | 0.1982 | 0.2018 | 63720 | 32210 | 4070 | 64281 | 31789 | 3930 | 590.35  | 696.99  |
| 100000 | 0.91 | 0.8  | 0.2  | 58240 | 32000 | 4000 | 22.69  | 0.7982 | 0.8018 | 0.1982 | 0.2018 | 63720 | 32210 | 4070 | 64281 | 31789 | 3930 | 473.84  | 570.33  |
| 100000 | 0.92 | 0.8  | 0.2  | 58880 | 32000 | 4000 | 17.74  | 0.7982 | 0.8018 | 0.1982 | 0.2018 | 63720 | 32210 | 4070 | 64281 | 31789 | 3930 | 370.19  | 456.41  |
| 100000 | 0.93 | 0.8  | 0.2  | 59520 | 32000 | 4000 | 13.45  | 0.7982 | 0.8018 | 0.1982 | 0.2018 | 63720 | 32210 | 4070 | 64281 | 31789 | 3930 | 279.40  | 355.24  |
| 100000 | 0.94 | 0.8  | 0.2  | 60160 | 32000 | 4000 | 9.78   | 0.7982 | 0.8018 | 0.1982 | 0.2018 | 63720 | 32210 | 4070 | 64281 | 31789 | 3930 | 201.46  | 266.81  |
| 100000 | 0.95 | 0.8  | 0.2  | 60800 | 32000 | 4000 | 6.72   | 0.7982 | 0.8018 | 0.1982 | 0.2018 | 63720 | 32210 | 4070 | 64281 | 31789 | 3930 | 136.38  | 191.13  |
| 100000 | 0.96 | 0.8  | 0.2  | 61440 | 32000 | 4000 | 4.26   | 0.7982 | 0.8018 | 0.1982 | 0.2018 | 63720 | 32210 | 4070 | 64281 | 31789 | 3930 | 84.15   | 128.19  |



|        |      |      |      |       |       |      |       |        |        |        |        |       |       |      |       |       |      |         |         |
|--------|------|------|------|-------|-------|------|-------|--------|--------|--------|--------|-------|-------|------|-------|-------|------|---------|---------|
| 100000 | 0.97 | 0.8  | 0.2  | 62080 | 32000 | 4000 | 2.37  | 0.7982 | 0.8018 | 0.1982 | 0.2018 | 63720 | 32210 | 4070 | 64281 | 31789 | 3930 | 44.78   | 77.99   |
| 100000 | 0.98 | 0.8  | 0.2  | 62720 | 32000 | 4000 | 1.04  | 0.7982 | 0.8018 | 0.1982 | 0.2018 | 63720 | 32210 | 4070 | 64281 | 31789 | 3930 | 18.27   | 40.54   |
| 100000 | 0.99 | 0.8  | 0.2  | 63360 | 32000 | 4000 | 0.26  | 0.7982 | 0.8018 | 0.1982 | 0.2018 | 63720 | 32210 | 4070 | 64281 | 31789 | 3930 | 4.62    | 15.83   |
| 100000 | 1.00 | 0.8  | 0.2  | 64000 | 32000 | 4000 | 0.00  | 0.7982 | 0.8018 | 0.1982 | 0.2018 | 63720 | 32210 | 4070 | 64281 | 31789 | 3930 | 3.82    | 3.87    |
| 100000 | 1.01 | 0.8  | 0.2  | 64640 | 32000 | 4000 | 0.25  | 0.7982 | 0.8018 | 0.1982 | 0.2018 | 63720 | 32210 | 4070 | 64281 | 31789 | 3930 | 15.87   | 4.65    |
| 100000 | 1.02 | 0.8  | 0.2  | 65280 | 32000 | 4000 | 1.00  | 0.7982 | 0.8018 | 0.1982 | 0.2018 | 63720 | 32210 | 4070 | 64281 | 31789 | 3930 | 40.79   | 18.17   |
| 100000 | 1.03 | 0.8  | 0.2  | 65920 | 32000 | 4000 | 2.24  | 0.7982 | 0.8018 | 0.1982 | 0.2018 | 63720 | 32210 | 4070 | 64281 | 31789 | 3930 | 78.55   | 44.44   |
| 100000 | 1.04 | 0.8  | 0.2  | 66560 | 32000 | 4000 | 3.94  | 0.7982 | 0.8018 | 0.1982 | 0.2018 | 63720 | 32210 | 4070 | 64281 | 31789 | 3930 | 129.18  | 83.45   |
| 100000 | 1.05 | 0.8  | 0.2  | 67200 | 32000 | 4000 | 6.11  | 0.7982 | 0.8018 | 0.1982 | 0.2018 | 63720 | 32210 | 4070 | 64281 | 31789 | 3930 | 192.66  | 135.21  |
| 100000 | 1.06 | 0.8  | 0.2  | 67840 | 32000 | 4000 | 8.71  | 0.7982 | 0.8018 | 0.1982 | 0.2018 | 63720 | 32210 | 4070 | 64281 | 31789 | 3930 | 269.00  | 199.71  |
| 100000 | 1.07 | 0.8  | 0.2  | 68480 | 32000 | 4000 | 11.75 | 0.7982 | 0.8018 | 0.1982 | 0.2018 | 63720 | 32210 | 4070 | 64281 | 31789 | 3930 | 358.19  | 276.96  |
| 100000 | 1.08 | 0.8  | 0.2  | 69120 | 32000 | 4000 | 15.21 | 0.7982 | 0.8018 | 0.1982 | 0.2018 | 63720 | 32210 | 4070 | 64281 | 31789 | 3930 | 460.24  | 366.95  |
| 100000 | 1.09 | 0.8  | 0.2  | 69760 | 32000 | 4000 | 19.08 | 0.7982 | 0.8018 | 0.1982 | 0.2018 | 63720 | 32210 | 4070 | 64281 | 31789 | 3930 | 575.15  | 469.68  |
| 100000 | 1.10 | 0.8  | 0.2  | 70400 | 32000 | 4000 | 23.35 | 0.7982 | 0.8018 | 0.1982 | 0.2018 | 63720 | 32210 | 4070 | 64281 | 31789 | 3930 | 702.91  | 585.16  |
| 100000 | 1.11 | 0.8  | 0.2  | 71040 | 32000 | 4000 | 28.01 | 0.7982 | 0.8018 | 0.1982 | 0.2018 | 63720 | 32210 | 4070 | 64281 | 31789 | 3930 | 843.53  | 713.38  |
| 100000 | 1.12 | 0.8  | 0.2  | 71680 | 32000 | 4000 | 33.05 | 0.7982 | 0.8018 | 0.1982 | 0.2018 | 63720 | 32210 | 4070 | 64281 | 31789 | 3930 | 997.01  | 854.34  |
| 100000 | 1.13 | 0.8  | 0.2  | 72320 | 32000 | 4000 | 38.45 | 0.7982 | 0.8018 | 0.1982 | 0.2018 | 63720 | 32210 | 4070 | 64281 | 31789 | 3930 | 1163.34 | 1008.05 |
| 100000 | 1.14 | 0.8  | 0.2  | 72960 | 32000 | 4000 | 44.21 | 0.7982 | 0.8018 | 0.1982 | 0.2018 | 63720 | 32210 | 4070 | 64281 | 31789 | 3930 | 1342.53 | 1174.51 |
| 100000 | 1.15 | 0.8  | 0.2  | 73600 | 32000 | 4000 | 50.33 | 0.7982 | 0.8018 | 0.1982 | 0.2018 | 63720 | 32210 | 4070 | 64281 | 31789 | 3930 | 1534.57 | 1353.70 |
| 100000 | 1.16 | 0.8  | 0.2  | 74240 | 32000 | 4000 | 56.78 | 0.7982 | 0.8018 | 0.1982 | 0.2018 | 63720 | 32210 | 4070 | 64281 | 31789 | 3930 | 1739.47 | 1545.65 |
| 100000 | 1.17 | 0.8  | 0.2  | 74880 | 32000 | 4000 | 63.57 | 0.7982 | 0.8018 | 0.1982 | 0.2018 | 63720 | 32210 | 4070 | 64281 | 31789 | 3930 | 1957.23 | 1750.33 |
| 100000 | 1.18 | 0.8  | 0.2  | 75520 | 32000 | 4000 | 70.68 | 0.7982 | 0.8018 | 0.1982 | 0.2018 | 63720 | 32210 | 4070 | 64281 | 31789 | 3930 | 2187.84 | 1967.76 |
| 100000 | 1.19 | 0.8  | 0.2  | 76160 | 32000 | 4000 | 78.11 | 0.7982 | 0.8018 | 0.1982 | 0.2018 | 63720 | 32210 | 4070 | 64281 | 31789 | 3930 | 2431.31 | 2197.94 |
| 100000 | 1.20 | 0.8  | 0.2  | 76800 | 32000 | 4000 | 85.84 | 0.7982 | 0.8018 | 0.1982 | 0.2018 | 63720 | 32210 | 4070 | 64281 | 31789 | 3930 | 2687.64 | 2440.85 |
| 100000 | 0.80 | 0.85 | 0.15 | 57800 | 25500 | 2250 | 80.75 | 0.8484 | 0.8516 | 0.1484 | 0.1516 | 71984 | 25719 | 2297 | 72516 | 25280 | 2203 | 2797.77 | 2989.39 |
| 100000 | 0.81 | 0.85 | 0.15 | 58523 | 25500 | 2250 | 72.01 | 0.8484 | 0.8516 | 0.1484 | 0.1516 | 71984 | 25719 | 2297 | 72516 | 25280 | 2203 | 2520.29 | 2703.34 |
| 100000 | 0.82 | 0.85 | 0.15 | 59245 | 25500 | 2250 | 63.87 | 0.8484 | 0.8516 | 0.1484 | 0.1516 | 71984 | 25719 | 2297 | 72516 | 25280 | 2203 | 2257.31 | 2431.69 |
| 100000 | 0.83 | 0.85 | 0.15 | 59968 | 25500 | 2250 | 56.31 | 0.8484 | 0.8516 | 0.1484 | 0.1516 | 71984 | 25719 | 2297 | 72516 | 25280 | 2203 | 2008.84 | 2174.44 |
| 100000 | 0.84 | 0.85 | 0.15 | 60690 | 25500 | 2250 | 49.30 | 0.8484 | 0.8516 | 0.1484 | 0.1516 | 71984 | 25719 | 2297 | 72516 | 25280 | 2203 | 1774.87 | 1931.58 |
| 100000 | 0.85 | 0.85 | 0.15 | 61413 | 25500 | 2250 | 42.84 | 0.8484 | 0.8516 | 0.1484 | 0.1516 | 71984 | 25719 | 2297 | 72516 | 25280 | 2203 | 1555.40 | 1703.12 |
| 100000 | 0.86 | 0.85 | 0.15 | 62135 | 25500 | 2250 | 36.90 | 0.8484 | 0.8516 | 0.1484 | 0.1516 | 71984 | 25719 | 2297 | 72516 | 25280 | 2203 | 1350.44 | 1489.06 |
| 100000 | 0.87 | 0.85 | 0.15 | 62858 | 25500 | 2250 | 31.46 | 0.8484 | 0.8516 | 0.1484 | 0.1516 | 71984 | 25719 | 2297 | 72516 | 25280 | 2203 | 1159.98 | 1289.40 |
| 100000 | 0.88 | 0.85 | 0.15 | 63580 | 25500 | 2250 | 26.51 | 0.8484 | 0.8516 | 0.1484 | 0.1516 | 71984 | 25719 | 2297 | 72516 | 25280 | 2203 | 984.02  | 1104.13 |
| 100000 | 0.89 | 0.85 | 0.15 | 64303 | 25500 | 2250 | 22.03 | 0.8484 | 0.8516 | 0.1484 | 0.1516 | 71984 | 25719 | 2297 | 72516 | 25280 | 2203 | 822.57  | 933.26  |
| 100000 | 0.90 | 0.85 | 0.15 | 65025 | 25500 | 2250 | 18.01 | 0.8484 | 0.8516 | 0.1484 | 0.1516 | 71984 | 25719 | 2297 | 72516 | 25280 | 2203 | 675.62  | 776.78  |

|        |      |      |      |       |       |      |       |        |        |        |        |       |       |      |       |       |      |         |         |
|--------|------|------|------|-------|-------|------|-------|--------|--------|--------|--------|-------|-------|------|-------|-------|------|---------|---------|
| 100000 | 0.91 | 0.85 | 0.15 | 65748 | 25500 | 2250 | 14.44 | 0.8484 | 0.8516 | 0.1484 | 0.1516 | 71984 | 25719 | 2297 | 72516 | 25280 | 2203 | 543.18  | 634.71  |
| 100000 | 0.92 | 0.85 | 0.15 | 66470 | 25500 | 2250 | 11.29 | 0.8484 | 0.8516 | 0.1484 | 0.1516 | 71984 | 25719 | 2297 | 72516 | 25280 | 2203 | 425.23  | 507.03  |
| 100000 | 0.93 | 0.85 | 0.15 | 67193 | 25500 | 2250 | 8.55  | 0.8484 | 0.8516 | 0.1484 | 0.1516 | 71984 | 25719 | 2297 | 72516 | 25280 | 2203 | 321.79  | 393.74  |
| 100000 | 0.94 | 0.85 | 0.15 | 67915 | 25500 | 2250 | 6.22  | 0.8484 | 0.8516 | 0.1484 | 0.1516 | 71984 | 25719 | 2297 | 72516 | 25280 | 2203 | 232.86  | 294.86  |
| 100000 | 0.95 | 0.85 | 0.15 | 68638 | 25500 | 2250 | 4.27  | 0.8484 | 0.8516 | 0.1484 | 0.1516 | 71984 | 25719 | 2297 | 72516 | 25280 | 2203 | 158.42  | 210.37  |
| 100000 | 0.96 | 0.85 | 0.15 | 69360 | 25500 | 2250 | 2.71  | 0.8484 | 0.8516 | 0.1484 | 0.1516 | 71984 | 25719 | 2297 | 72516 | 25280 | 2203 | 98.49   | 140.27  |
| 100000 | 0.97 | 0.85 | 0.15 | 70083 | 25500 | 2250 | 1.51  | 0.8484 | 0.8516 | 0.1484 | 0.1516 | 71984 | 25719 | 2297 | 72516 | 25280 | 2203 | 53.07   | 84.58   |
| 100000 | 0.98 | 0.85 | 0.15 | 70805 | 25500 | 2250 | 0.66  | 0.8484 | 0.8516 | 0.1484 | 0.1516 | 71984 | 25719 | 2297 | 72516 | 25280 | 2203 | 22.14   | 43.28   |
| 100000 | 0.99 | 0.85 | 0.15 | 71528 | 25500 | 2250 | 0.16  | 0.8484 | 0.8516 | 0.1484 | 0.1516 | 71984 | 25719 | 2297 | 72516 | 25280 | 2203 | 5.73    | 16.38   |
| 100000 | 1.00 | 0.85 | 0.15 | 72250 | 25500 | 2250 | 0.00  | 0.8484 | 0.8516 | 0.1484 | 0.1516 | 71984 | 25719 | 2297 | 72516 | 25280 | 2203 | 3.81    | 3.88    |
| 100000 | 1.01 | 0.85 | 0.15 | 72973 | 25500 | 2250 | 0.16  | 0.8484 | 0.8516 | 0.1484 | 0.1516 | 71984 | 25719 | 2297 | 72516 | 25280 | 2203 | 16.40   | 5.77    |
| 100000 | 1.02 | 0.85 | 0.15 | 73695 | 25500 | 2250 | 0.64  | 0.8484 | 0.8516 | 0.1484 | 0.1516 | 71984 | 25719 | 2297 | 72516 | 25280 | 2203 | 43.49   | 22.06   |
| 100000 | 1.03 | 0.85 | 0.15 | 74418 | 25500 | 2250 | 1.42  | 0.8484 | 0.8516 | 0.1484 | 0.1516 | 71984 | 25719 | 2297 | 72516 | 25280 | 2203 | 85.08   | 52.74   |
| 100000 | 1.04 | 0.85 | 0.15 | 75140 | 25500 | 2250 | 2.50  | 0.8484 | 0.8516 | 0.1484 | 0.1516 | 71984 | 25719 | 2297 | 72516 | 25280 | 2203 | 141.18  | 97.83   |
| 100000 | 1.05 | 0.85 | 0.15 | 75863 | 25500 | 2250 | 3.87  | 0.8484 | 0.8516 | 0.1484 | 0.1516 | 71984 | 25719 | 2297 | 72516 | 25280 | 2203 | 211.78  | 157.31  |
| 100000 | 1.06 | 0.85 | 0.15 | 76585 | 25500 | 2250 | 5.53  | 0.8484 | 0.8516 | 0.1484 | 0.1516 | 71984 | 25719 | 2297 | 72516 | 25280 | 2203 | 296.88  | 231.18  |
| 100000 | 1.07 | 0.85 | 0.15 | 77308 | 25500 | 2250 | 7.45  | 0.8484 | 0.8516 | 0.1484 | 0.1516 | 71984 | 25719 | 2297 | 72516 | 25280 | 2203 | 396.49  | 319.46  |
| 100000 | 1.08 | 0.85 | 0.15 | 78030 | 25500 | 2250 | 9.65  | 0.8484 | 0.8516 | 0.1484 | 0.1516 | 71984 | 25719 | 2297 | 72516 | 25280 | 2203 | 510.60  | 422.13  |
| 100000 | 1.09 | 0.85 | 0.15 | 78753 | 25500 | 2250 | 12.10 | 0.8484 | 0.8516 | 0.1484 | 0.1516 | 71984 | 25719 | 2297 | 72516 | 25280 | 2203 | 639.21  | 539.20  |
| 100000 | 1.10 | 0.85 | 0.15 | 79475 | 25500 | 2250 | 14.81 | 0.8484 | 0.8516 | 0.1484 | 0.1516 | 71984 | 25719 | 2297 | 72516 | 25280 | 2203 | 782.33  | 670.66  |
| 100000 | 1.11 | 0.85 | 0.15 | 80198 | 25500 | 2250 | 17.76 | 0.8484 | 0.8516 | 0.1484 | 0.1516 | 71984 | 25719 | 2297 | 72516 | 25280 | 2203 | 939.95  | 816.52  |
| 100000 | 1.12 | 0.85 | 0.15 | 80920 | 25500 | 2250 | 20.95 | 0.8484 | 0.8516 | 0.1484 | 0.1516 | 71984 | 25719 | 2297 | 72516 | 25280 | 2203 | 1112.08 | 976.78  |
| 100000 | 1.13 | 0.85 | 0.15 | 81643 | 25500 | 2250 | 24.37 | 0.8484 | 0.8516 | 0.1484 | 0.1516 | 71984 | 25719 | 2297 | 72516 | 25280 | 2203 | 1298.70 | 1151.44 |
| 100000 | 1.14 | 0.85 | 0.15 | 82365 | 25500 | 2250 | 28.02 | 0.8484 | 0.8516 | 0.1484 | 0.1516 | 71984 | 25719 | 2297 | 72516 | 25280 | 2203 | 1499.83 | 1340.49 |
| 100000 | 1.15 | 0.85 | 0.15 | 83088 | 25500 | 2250 | 31.89 | 0.8484 | 0.8516 | 0.1484 | 0.1516 | 71984 | 25719 | 2297 | 72516 | 25280 | 2203 | 1715.47 | 1543.94 |
| 100000 | 1.16 | 0.85 | 0.15 | 83810 | 25500 | 2250 | 35.98 | 0.8484 | 0.8516 | 0.1484 | 0.1516 | 71984 | 25719 | 2297 | 72516 | 25280 | 2203 | 1945.61 | 1761.79 |
| 100000 | 1.17 | 0.85 | 0.15 | 84533 | 25500 | 2250 | 40.27 | 0.8484 | 0.8516 | 0.1484 | 0.1516 | 71984 | 25719 | 2297 | 72516 | 25280 | 2203 | 2190.25 | 1994.03 |
| 100000 | 1.18 | 0.85 | 0.15 | 85255 | 25500 | 2250 | 44.77 | 0.8484 | 0.8516 | 0.1484 | 0.1516 | 71984 | 25719 | 2297 | 72516 | 25280 | 2203 | 2449.39 | 2240.67 |
| 100000 | 1.19 | 0.85 | 0.15 | 85978 | 25500 | 2250 | 49.47 | 0.8484 | 0.8516 | 0.1484 | 0.1516 | 71984 | 25719 | 2297 | 72516 | 25280 | 2203 | 2723.04 | 2501.71 |
| 100000 | 1.20 | 0.85 | 0.15 | 86700 | 25500 | 2250 | 54.37 | 0.8484 | 0.8516 | 0.1484 | 0.1516 | 71984 | 25719 | 2297 | 72516 | 25280 | 2203 | 3011.19 | 2777.14 |
| 100000 | 0.80 | 0.9  | 0.1  | 64800 | 18000 | 1000 | 40.38 | 0.8987 | 0.9013 | 0.0987 | 0.1013 | 80764 | 18210 | 1026 | 81237 | 17789 | 974  | 3158.41 | 3328.90 |
| 100000 | 0.81 | 0.9  | 0.1  | 65610 | 18000 | 1000 | 36.00 | 0.8987 | 0.9013 | 0.0987 | 0.1013 | 80764 | 18210 | 1026 | 81237 | 17789 | 974  | 2846.33 | 3009.20 |
| 100000 | 0.82 | 0.9  | 0.1  | 66420 | 18000 | 1000 | 31.92 | 0.8987 | 0.9013 | 0.0987 | 0.1013 | 80764 | 18210 | 1026 | 81237 | 17789 | 974  | 2550.50 | 2705.65 |
| 100000 | 0.83 | 0.9  | 0.1  | 67230 | 18000 | 1000 | 28.14 | 0.8987 | 0.9013 | 0.0987 | 0.1013 | 80764 | 18210 | 1026 | 81237 | 17789 | 974  | 2270.91 | 2418.25 |
| 100000 | 0.84 | 0.9  | 0.1  | 68040 | 18000 | 1000 | 24.63 | 0.8987 | 0.9013 | 0.0987 | 0.1013 | 80764 | 18210 | 1026 | 81237 | 17789 | 974  | 2007.57 | 2147.01 |

|        |      |     |     |       |       |      |       |        |        |        |        |       |       |      |       |       |     |         |         |
|--------|------|-----|-----|-------|-------|------|-------|--------|--------|--------|--------|-------|-------|------|-------|-------|-----|---------|---------|
| 100000 | 0.85 | 0.9 | 0.1 | 68850 | 18000 | 1000 | 21.40 | 0.8987 | 0.9013 | 0.0987 | 0.1013 | 80764 | 18210 | 1026 | 81237 | 17789 | 974 | 1760.48 | 1891.92 |
| 100000 | 0.86 | 0.9 | 0.1 | 69660 | 18000 | 1000 | 18.43 | 0.8987 | 0.9013 | 0.0987 | 0.1013 | 80764 | 18210 | 1026 | 81237 | 17789 | 974 | 1529.63 | 1652.98 |
| 100000 | 0.87 | 0.9 | 0.1 | 70470 | 18000 | 1000 | 15.71 | 0.8987 | 0.9013 | 0.0987 | 0.1013 | 80764 | 18210 | 1026 | 81237 | 17789 | 974 | 1315.04 | 1430.19 |
| 100000 | 0.88 | 0.9 | 0.1 | 71280 | 18000 | 1000 | 13.23 | 0.8987 | 0.9013 | 0.0987 | 0.1013 | 80764 | 18210 | 1026 | 81237 | 17789 | 974 | 1116.69 | 1223.56 |
| 100000 | 0.89 | 0.9 | 0.1 | 72090 | 18000 | 1000 | 11.00 | 0.8987 | 0.9013 | 0.0987 | 0.1013 | 80764 | 18210 | 1026 | 81237 | 17789 | 974 | 934.59  | 1033.08 |
| 100000 | 0.90 | 0.9 | 0.1 | 72900 | 18000 | 1000 | 8.99  | 0.8987 | 0.9013 | 0.0987 | 0.1013 | 80764 | 18210 | 1026 | 81237 | 17789 | 974 | 768.73  | 858.76  |
| 100000 | 0.91 | 0.9 | 0.1 | 73710 | 18000 | 1000 | 7.20  | 0.8987 | 0.9013 | 0.0987 | 0.1013 | 80764 | 18210 | 1026 | 81237 | 17789 | 974 | 619.13  | 700.58  |
| 100000 | 0.92 | 0.9 | 0.1 | 74520 | 18000 | 1000 | 5.63  | 0.8987 | 0.9013 | 0.0987 | 0.1013 | 80764 | 18210 | 1026 | 81237 | 17789 | 974 | 485.77  | 558.56  |
| 100000 | 0.93 | 0.9 | 0.1 | 75330 | 18000 | 1000 | 4.26  | 0.8987 | 0.9013 | 0.0987 | 0.1013 | 80764 | 18210 | 1026 | 81237 | 17789 | 974 | 368.65  | 432.69  |
| 100000 | 0.94 | 0.9 | 0.1 | 76140 | 18000 | 1000 | 3.10  | 0.8987 | 0.9013 | 0.0987 | 0.1013 | 80764 | 18210 | 1026 | 81237 | 17789 | 974 | 267.79  | 322.97  |
| 100000 | 0.95 | 0.9 | 0.1 | 76950 | 18000 | 1000 | 2.13  | 0.8987 | 0.9013 | 0.0987 | 0.1013 | 80764 | 18210 | 1026 | 81237 | 17789 | 974 | 183.17  | 229.41  |
| 100000 | 0.96 | 0.9 | 0.1 | 77760 | 18000 | 1000 | 1.35  | 0.8987 | 0.9013 | 0.0987 | 0.1013 | 80764 | 18210 | 1026 | 81237 | 17789 | 974 | 114.80  | 152.00  |
| 100000 | 0.97 | 0.9 | 0.1 | 78570 | 18000 | 1000 | 0.75  | 0.8987 | 0.9013 | 0.0987 | 0.1013 | 80764 | 18210 | 1026 | 81237 | 17789 | 974 | 62.68   | 90.74   |
| 100000 | 0.98 | 0.9 | 0.1 | 79380 | 18000 | 1000 | 0.33  | 0.8987 | 0.9013 | 0.0987 | 0.1013 | 80764 | 18210 | 1026 | 81237 | 17789 | 974 | 26.80   | 45.64   |
| 100000 | 0.99 | 0.9 | 0.1 | 80190 | 18000 | 1000 | 0.08  | 0.8987 | 0.9013 | 0.0987 | 0.1013 | 80764 | 18210 | 1026 | 81237 | 17789 | 974 | 7.18    | 16.69   |
| 100000 | 1.00 | 0.9 | 0.1 | 81000 | 18000 | 1000 | 0.00  | 0.8987 | 0.9013 | 0.0987 | 0.1013 | 80764 | 18210 | 1026 | 81237 | 17789 | 974 | 3.80    | 3.89    |
| 100000 | 1.01 | 0.9 | 0.1 | 81810 | 18000 | 1000 | 0.08  | 0.8987 | 0.9013 | 0.0987 | 0.1013 | 80764 | 18210 | 1026 | 81237 | 17789 | 974 | 16.66   | 7.24    |
| 100000 | 1.02 | 0.9 | 0.1 | 82620 | 18000 | 1000 | 0.32  | 0.8987 | 0.9013 | 0.0987 | 0.1013 | 80764 | 18210 | 1026 | 81237 | 17789 | 974 | 45.78   | 26.75   |
| 100000 | 1.03 | 0.9 | 0.1 | 83430 | 18000 | 1000 | 0.71  | 0.8987 | 0.9013 | 0.0987 | 0.1013 | 80764 | 18210 | 1026 | 81237 | 17789 | 974 | 91.14   | 62.41   |
| 100000 | 1.04 | 0.9 | 0.1 | 84240 | 18000 | 1000 | 1.25  | 0.8987 | 0.9013 | 0.0987 | 0.1013 | 80764 | 18210 | 1026 | 81237 | 17789 | 974 | 152.75  | 114.22  |
| 100000 | 1.05 | 0.9 | 0.1 | 85050 | 18000 | 1000 | 1.93  | 0.8987 | 0.9013 | 0.0987 | 0.1013 | 80764 | 18210 | 1026 | 81237 | 17789 | 974 | 230.61  | 182.18  |
| 100000 | 1.06 | 0.9 | 0.1 | 85860 | 18000 | 1000 | 2.75  | 0.8987 | 0.9013 | 0.0987 | 0.1013 | 80764 | 18210 | 1026 | 81237 | 17789 | 974 | 324.71  | 266.30  |
| 100000 | 1.07 | 0.9 | 0.1 | 86670 | 18000 | 1000 | 3.71  | 0.8987 | 0.9013 | 0.0987 | 0.1013 | 80764 | 18210 | 1026 | 81237 | 17789 | 974 | 435.07  | 366.57  |
| 100000 | 1.08 | 0.9 | 0.1 | 87480 | 18000 | 1000 | 4.80  | 0.8987 | 0.9013 | 0.0987 | 0.1013 | 80764 | 18210 | 1026 | 81237 | 17789 | 974 | 561.66  | 482.99  |
| 100000 | 1.09 | 0.9 | 0.1 | 88290 | 18000 | 1000 | 6.02  | 0.8987 | 0.9013 | 0.0987 | 0.1013 | 80764 | 18210 | 1026 | 81237 | 17789 | 974 | 704.51  | 615.57  |
| 100000 | 1.10 | 0.9 | 0.1 | 89100 | 18000 | 1000 | 7.37  | 0.8987 | 0.9013 | 0.0987 | 0.1013 | 80764 | 18210 | 1026 | 81237 | 17789 | 974 | 863.61  | 764.30  |
| 100000 | 1.11 | 0.9 | 0.1 | 89910 | 18000 | 1000 | 8.84  | 0.8987 | 0.9013 | 0.0987 | 0.1013 | 80764 | 18210 | 1026 | 81237 | 17789 | 974 | 1038.95 | 929.18  |
| 100000 | 1.12 | 0.9 | 0.1 | 90720 | 18000 | 1000 | 10.42 | 0.8987 | 0.9013 | 0.0987 | 0.1013 | 80764 | 18210 | 1026 | 81237 | 17789 | 974 | 1230.54 | 1110.21 |
| 100000 | 1.13 | 0.9 | 0.1 | 91530 | 18000 | 1000 | 12.13 | 0.8987 | 0.9013 | 0.0987 | 0.1013 | 80764 | 18210 | 1026 | 81237 | 17789 | 974 | 1438.37 | 1307.40 |
| 100000 | 1.14 | 0.9 | 0.1 | 92340 | 18000 | 1000 | 13.94 | 0.8987 | 0.9013 | 0.0987 | 0.1013 | 80764 | 18210 | 1026 | 81237 | 17789 | 974 | 1662.46 | 1520.74 |
| 100000 | 1.15 | 0.9 | 0.1 | 93150 | 18000 | 1000 | 15.87 | 0.8987 | 0.9013 | 0.0987 | 0.1013 | 80764 | 18210 | 1026 | 81237 | 17789 | 974 | 1902.79 | 1750.23 |
| 100000 | 1.16 | 0.9 | 0.1 | 93960 | 18000 | 1000 | 17.90 | 0.8987 | 0.9013 | 0.0987 | 0.1013 | 80764 | 18210 | 1026 | 81237 | 17789 | 974 | 2159.37 | 1995.87 |
| 100000 | 1.17 | 0.9 | 0.1 | 94770 | 18000 | 1000 | 20.03 | 0.8987 | 0.9013 | 0.0987 | 0.1013 | 80764 | 18210 | 1026 | 81237 | 17789 | 974 | 2432.19 | 2257.67 |
| 100000 | 1.18 | 0.9 | 0.1 | 95580 | 18000 | 1000 | 22.27 | 0.8987 | 0.9013 | 0.0987 | 0.1013 | 80764 | 18210 | 1026 | 81237 | 17789 | 974 | 2721.27 | 2535.62 |
| 100000 | 1.19 | 0.9 | 0.1 | 96390 | 18000 | 1000 | 24.61 | 0.8987 | 0.9013 | 0.0987 | 0.1013 | 80764 | 18210 | 1026 | 81237 | 17789 | 974 | 3026.59 | 2829.73 |

|        |      |      |      |        |       |      |       |        |        |        |        |       |       |      |       |       |     |         |         |
|--------|------|------|------|--------|-------|------|-------|--------|--------|--------|--------|-------|-------|------|-------|-------|-----|---------|---------|
| 100000 | 1.20 | 0.9  | 0.1  | 97200  | 18000 | 1000 | 27.04 | 0.8987 | 0.9013 | 0.0987 | 0.1013 | 80764 | 18210 | 1026 | 81237 | 17789 | 974 | 3348.16 | 3139.98 |
| 100000 | 0.80 | 0.95 | 0.05 | 72200  | 9500  | 250  | 11.27 | 0.9490 | 0.9510 | 0.0490 | 0.0510 | 90069 | 9672  | 260  | 90432 | 9328  | 241 | 3548.34 | 3679.15 |
| 100000 | 0.81 | 0.95 | 0.05 | 73103  | 9500  | 250  | 10.05 | 0.9490 | 0.9510 | 0.0490 | 0.0510 | 90069 | 9672  | 260  | 90432 | 9328  | 241 | 3199.29 | 3324.26 |
| 100000 | 0.82 | 0.95 | 0.05 | 74005  | 9500  | 250  | 8.91  | 0.9490 | 0.9510 | 0.0490 | 0.0510 | 90069 | 9672  | 260  | 90432 | 9328  | 241 | 2868.33 | 2987.38 |
| 100000 | 0.83 | 0.95 | 0.05 | 74908  | 9500  | 250  | 7.85  | 0.9490 | 0.9510 | 0.0490 | 0.0510 | 90069 | 9672  | 260  | 90432 | 9328  | 241 | 2555.45 | 2668.51 |
| 100000 | 0.84 | 0.95 | 0.05 | 75810  | 9500  | 250  | 6.87  | 0.9490 | 0.9510 | 0.0490 | 0.0510 | 90069 | 9672  | 260  | 90432 | 9328  | 241 | 2260.66 | 2367.66 |
| 100000 | 0.85 | 0.95 | 0.05 | 76713  | 9500  | 250  | 5.97  | 0.9490 | 0.9510 | 0.0490 | 0.0510 | 90069 | 9672  | 260  | 90432 | 9328  | 241 | 1983.96 | 2084.82 |
| 100000 | 0.86 | 0.95 | 0.05 | 77615  | 9500  | 250  | 5.14  | 0.9490 | 0.9510 | 0.0490 | 0.0510 | 90069 | 9672  | 260  | 90432 | 9328  | 241 | 1725.34 | 1820.00 |
| 100000 | 0.87 | 0.95 | 0.05 | 78518  | 9500  | 250  | 4.38  | 0.9490 | 0.9510 | 0.0490 | 0.0510 | 90069 | 9672  | 260  | 90432 | 9328  | 241 | 1484.81 | 1573.19 |
| 100000 | 0.88 | 0.95 | 0.05 | 79420  | 9500  | 250  | 3.69  | 0.9490 | 0.9510 | 0.0490 | 0.0510 | 90069 | 9672  | 260  | 90432 | 9328  | 241 | 1262.37 | 1344.39 |
| 100000 | 0.89 | 0.95 | 0.05 | 80323  | 9500  | 250  | 3.07  | 0.9490 | 0.9510 | 0.0490 | 0.0510 | 90069 | 9672  | 260  | 90432 | 9328  | 241 | 1058.01 | 1133.61 |
| 100000 | 0.90 | 0.95 | 0.05 | 81225  | 9500  | 250  | 2.51  | 0.9490 | 0.9510 | 0.0490 | 0.0510 | 90069 | 9672  | 260  | 90432 | 9328  | 241 | 871.74  | 940.84  |
| 100000 | 0.91 | 0.95 | 0.05 | 82128  | 9500  | 250  | 2.01  | 0.9490 | 0.9510 | 0.0490 | 0.0510 | 90069 | 9672  | 260  | 90432 | 9328  | 241 | 703.55  | 766.09  |
| 100000 | 0.92 | 0.95 | 0.05 | 83030  | 9500  | 250  | 1.57  | 0.9490 | 0.9510 | 0.0490 | 0.0510 | 90069 | 9672  | 260  | 90432 | 9328  | 241 | 553.46  | 609.35  |
| 100000 | 0.93 | 0.95 | 0.05 | 83933  | 9500  | 250  | 1.19  | 0.9490 | 0.9510 | 0.0490 | 0.0510 | 90069 | 9672  | 260  | 90432 | 9328  | 241 | 421.44  | 470.62  |
| 100000 | 0.94 | 0.95 | 0.05 | 84835  | 9500  | 250  | 0.86  | 0.9490 | 0.9510 | 0.0490 | 0.0510 | 90069 | 9672  | 260  | 90432 | 9328  | 241 | 307.52  | 349.91  |
| 100000 | 0.95 | 0.95 | 0.05 | 85738  | 9500  | 250  | 0.59  | 0.9490 | 0.9510 | 0.0490 | 0.0510 | 90069 | 9672  | 260  | 90432 | 9328  | 241 | 211.68  | 247.21  |
| 100000 | 0.96 | 0.95 | 0.05 | 86640  | 9500  | 250  | 0.38  | 0.9490 | 0.9510 | 0.0490 | 0.0510 | 90069 | 9672  | 260  | 90432 | 9328  | 241 | 133.92  | 162.52  |
| 100000 | 0.97 | 0.95 | 0.05 | 87543  | 9500  | 250  | 0.21  | 0.9490 | 0.9510 | 0.0490 | 0.0510 | 90069 | 9672  | 260  | 90432 | 9328  | 241 | 74.26   | 95.85   |
| 100000 | 0.98 | 0.95 | 0.05 | 88445  | 9500  | 250  | 0.09  | 0.9490 | 0.9510 | 0.0490 | 0.0510 | 90069 | 9672  | 260  | 90432 | 9328  | 241 | 32.68   | 47.19   |
| 100000 | 0.99 | 0.95 | 0.05 | 89348  | 9500  | 250  | 0.02  | 0.9490 | 0.9510 | 0.0490 | 0.0510 | 90069 | 9672  | 260  | 90432 | 9328  | 241 | 9.18    | 16.54   |
| 100000 | 1.00 | 0.95 | 0.05 | 90250  | 9500  | 250  | 0.00  | 0.9490 | 0.9510 | 0.0490 | 0.0510 | 90069 | 9672  | 260  | 90432 | 9328  | 241 | 3.77    | 3.91    |
| 100000 | 1.01 | 0.95 | 0.05 | 91153  | 9500  | 250  | 0.02  | 0.9490 | 0.9510 | 0.0490 | 0.0510 | 90069 | 9672  | 260  | 90432 | 9328  | 241 | 16.45   | 9.30    |
| 100000 | 1.02 | 0.95 | 0.05 | 92055  | 9500  | 250  | 0.09  | 0.9490 | 0.9510 | 0.0490 | 0.0510 | 90069 | 9672  | 260  | 90432 | 9328  | 241 | 47.22   | 32.69   |
| 100000 | 1.03 | 0.95 | 0.05 | 92958  | 9500  | 250  | 0.20  | 0.9490 | 0.9510 | 0.0490 | 0.0510 | 90069 | 9672  | 260  | 90432 | 9328  | 241 | 96.07   | 74.10   |
| 100000 | 1.04 | 0.95 | 0.05 | 93860  | 9500  | 250  | 0.35  | 0.9490 | 0.9510 | 0.0490 | 0.0510 | 90069 | 9672  | 260  | 90432 | 9328  | 241 | 163.00  | 133.53  |
| 100000 | 1.05 | 0.95 | 0.05 | 94763  | 9500  | 250  | 0.54  | 0.9490 | 0.9510 | 0.0490 | 0.0510 | 90069 | 9672  | 260  | 90432 | 9328  | 241 | 248.03  | 210.96  |
| 100000 | 1.06 | 0.95 | 0.05 | 95665  | 9500  | 250  | 0.77  | 0.9490 | 0.9510 | 0.0490 | 0.0510 | 90069 | 9672  | 260  | 90432 | 9328  | 241 | 351.14  | 306.41  |
| 100000 | 1.07 | 0.95 | 0.05 | 96568  | 9500  | 250  | 1.03  | 0.9490 | 0.9510 | 0.0490 | 0.0510 | 90069 | 9672  | 260  | 90432 | 9328  | 241 | 472.34  | 419.88  |
| 100000 | 1.08 | 0.95 | 0.05 | 97470  | 9500  | 250  | 1.34  | 0.9490 | 0.9510 | 0.0490 | 0.0510 | 90069 | 9672  | 260  | 90432 | 9328  | 241 | 611.62  | 551.36  |
| 100000 | 1.09 | 0.95 | 0.05 | 98373  | 9500  | 250  | 1.68  | 0.9490 | 0.9510 | 0.0490 | 0.0510 | 90069 | 9672  | 260  | 90432 | 9328  | 241 | 768.99  | 700.85  |
| 100000 | 1.10 | 0.95 | 0.05 | 99275  | 9500  | 250  | 2.05  | 0.9490 | 0.9510 | 0.0490 | 0.0510 | 90069 | 9672  | 260  | 90432 | 9328  | 241 | 944.44  | 868.36  |
| 100000 | 1.11 | 0.95 | 0.05 | 100178 | 9500  | 250  | 2.46  | 0.9490 | 0.9510 | 0.0490 | 0.0510 | 90069 | 9672  | 260  | 90432 | 9328  | 241 | 1137.98 | 1053.88 |
| 100000 | 1.12 | 0.95 | 0.05 | 101080 | 9500  | 250  | 2.90  | 0.9490 | 0.9510 | 0.0490 | 0.0510 | 90069 | 9672  | 260  | 90432 | 9328  | 241 | 1349.61 | 1257.41 |
| 100000 | 1.13 | 0.95 | 0.05 | 101983 | 9500  | 250  | 3.38  | 0.9490 | 0.9510 | 0.0490 | 0.0510 | 90069 | 9672  | 260  | 90432 | 9328  | 241 | 1579.33 | 1478.96 |

|        |      |      |      |        |      |     |      |        |        |        |        |        |      |     |        |      |     |         |         |
|--------|------|------|------|--------|------|-----|------|--------|--------|--------|--------|--------|------|-----|--------|------|-----|---------|---------|
| 100000 | 1.14 | 0.95 | 0.05 | 102885 | 9500 | 250 | 3.88 | 0.9490 | 0.9510 | 0.0490 | 0.0510 | 90069  | 9672 | 260 | 90432  | 9328 | 241 | 1827.13 | 1718.52 |
| 100000 | 1.15 | 0.95 | 0.05 | 103788 | 9500 | 250 | 4.42 | 0.9490 | 0.9510 | 0.0490 | 0.0510 | 90069  | 9672 | 260 | 90432  | 9328 | 241 | 2093.02 | 1976.10 |
| 100000 | 1.16 | 0.95 | 0.05 | 104690 | 9500 | 250 | 4.98 | 0.9490 | 0.9510 | 0.0490 | 0.0510 | 90069  | 9672 | 260 | 90432  | 9328 | 241 | 2376.99 | 2251.69 |
| 100000 | 1.17 | 0.95 | 0.05 | 105593 | 9500 | 250 | 5.57 | 0.9490 | 0.9510 | 0.0490 | 0.0510 | 90069  | 9672 | 260 | 90432  | 9328 | 241 | 2679.05 | 2545.29 |
| 100000 | 1.18 | 0.95 | 0.05 | 106495 | 9500 | 250 | 6.20 | 0.9490 | 0.9510 | 0.0490 | 0.0510 | 90069  | 9672 | 260 | 90432  | 9328 | 241 | 2999.20 | 2856.90 |
| 100000 | 1.19 | 0.95 | 0.05 | 107398 | 9500 | 250 | 6.85 | 0.9490 | 0.9510 | 0.0490 | 0.0510 | 90069  | 9672 | 260 | 90432  | 9328 | 241 | 3337.43 | 3186.54 |
| 100000 | 1.20 | 0.95 | 0.05 | 108300 | 9500 | 250 | 7.52 | 0.9490 | 0.9510 | 0.0490 | 0.0510 | 90069  | 9672 | 260 | 90432  | 9328 | 241 | 3693.75 | 3534.18 |
| 100000 | 0.80 | 1    | 0    | 80000  | 0    | 0   | 7.52 | 1.0000 | 1.0000 | 0.0000 | 0.0000 | 100000 | 0    | 0   | 100000 | 0    | 0   | .       | .       |
| 100000 | 0.81 | 1    | 0    | 81000  | 0    | 0   | 7.52 | 1.0000 | 1.0000 | 0.0000 | 0.0000 | 100000 | 0    | 0   | 100000 | 0    | 0   | .       | .       |
| 100000 | 0.82 | 1    | 0    | 82000  | 0    | 0   | 7.52 | 1.0000 | 1.0000 | 0.0000 | 0.0000 | 100000 | 0    | 0   | 100000 | 0    | 0   | .       | .       |
| 100000 | 0.83 | 1    | 0    | 83000  | 0    | 0   | 7.52 | 1.0000 | 1.0000 | 0.0000 | 0.0000 | 100000 | 0    | 0   | 100000 | 0    | 0   | .       | .       |
| 100000 | 0.84 | 1    | 0    | 84000  | 0    | 0   | 7.52 | 1.0000 | 1.0000 | 0.0000 | 0.0000 | 100000 | 0    | 0   | 100000 | 0    | 0   | .       | .       |
| 100000 | 0.85 | 1    | 0    | 85000  | 0    | 0   | 7.52 | 1.0000 | 1.0000 | 0.0000 | 0.0000 | 100000 | 0    | 0   | 100000 | 0    | 0   | .       | .       |
| 100000 | 0.86 | 1    | 0    | 86000  | 0    | 0   | 7.52 | 1.0000 | 1.0000 | 0.0000 | 0.0000 | 100000 | 0    | 0   | 100000 | 0    | 0   | .       | .       |
| 100000 | 0.87 | 1    | 0    | 87000  | 0    | 0   | 7.52 | 1.0000 | 1.0000 | 0.0000 | 0.0000 | 100000 | 0    | 0   | 100000 | 0    | 0   | .       | .       |
| 100000 | 0.88 | 1    | 0    | 88000  | 0    | 0   | 7.52 | 1.0000 | 1.0000 | 0.0000 | 0.0000 | 100000 | 0    | 0   | 100000 | 0    | 0   | .       | .       |
| 100000 | 0.89 | 1    | 0    | 89000  | 0    | 0   | 7.52 | 1.0000 | 1.0000 | 0.0000 | 0.0000 | 100000 | 0    | 0   | 100000 | 0    | 0   | .       | .       |
| 100000 | 0.90 | 1    | 0    | 90000  | 0    | 0   | 7.52 | 1.0000 | 1.0000 | 0.0000 | 0.0000 | 100000 | 0    | 0   | 100000 | 0    | 0   | .       | .       |
| 100000 | 0.91 | 1    | 0    | 91000  | 0    | 0   | 7.52 | 1.0000 | 1.0000 | 0.0000 | 0.0000 | 100000 | 0    | 0   | 100000 | 0    | 0   | .       | .       |
| 100000 | 0.92 | 1    | 0    | 92000  | 0    | 0   | 7.52 | 1.0000 | 1.0000 | 0.0000 | 0.0000 | 100000 | 0    | 0   | 100000 | 0    | 0   | .       | .       |
| 100000 | 0.93 | 1    | 0    | 93000  | 0    | 0   | 7.52 | 1.0000 | 1.0000 | 0.0000 | 0.0000 | 100000 | 0    | 0   | 100000 | 0    | 0   | .       | .       |
| 100000 | 0.94 | 1    | 0    | 94000  | 0    | 0   | 7.52 | 1.0000 | 1.0000 | 0.0000 | 0.0000 | 100000 | 0    | 0   | 100000 | 0    | 0   | .       | .       |
| 100000 | 0.95 | 1    | 0    | 95000  | 0    | 0   | 7.52 | 1.0000 | 1.0000 | 0.0000 | 0.0000 | 100000 | 0    | 0   | 100000 | 0    | 0   | .       | .       |
| 100000 | 0.96 | 1    | 0    | 96000  | 0    | 0   | 7.52 | 1.0000 | 1.0000 | 0.0000 | 0.0000 | 100000 | 0    | 0   | 100000 | 0    | 0   | .       | .       |
| 100000 | 0.97 | 1    | 0    | 97000  | 0    | 0   | 7.52 | 1.0000 | 1.0000 | 0.0000 | 0.0000 | 100000 | 0    | 0   | 100000 | 0    | 0   | .       | .       |
| 100000 | 0.98 | 1    | 0    | 98000  | 0    | 0   | 7.52 | 1.0000 | 1.0000 | 0.0000 | 0.0000 | 100000 | 0    | 0   | 100000 | 0    | 0   | .       | .       |
| 100000 | 0.99 | 1    | 0    | 99000  | 0    | 0   | 7.52 | 1.0000 | 1.0000 | 0.0000 | 0.0000 | 100000 | 0    | 0   | 100000 | 0    | 0   | .       | .       |
| 100000 | 1.00 | 1    | 0    | 100000 | 0    | 0   | 7.52 | 1.0000 | 1.0000 | 0.0000 | 0.0000 | 100000 | 0    | 0   | 100000 | 0    | 0   | .       | .       |
| 100000 | 1.01 | 1    | 0    | 101000 | 0    | 0   | 7.52 | 1.0000 | 1.0000 | 0.0000 | 0.0000 | 100000 | 0    | 0   | 100000 | 0    | 0   | .       | .       |
| 100000 | 1.02 | 1    | 0    | 102000 | 0    | 0   | 7.52 | 1.0000 | 1.0000 | 0.0000 | 0.0000 | 100000 | 0    | 0   | 100000 | 0    | 0   | .       | .       |
| 100000 | 1.03 | 1    | 0    | 103000 | 0    | 0   | 7.52 | 1.0000 | 1.0000 | 0.0000 | 0.0000 | 100000 | 0    | 0   | 100000 | 0    | 0   | .       | .       |
| 100000 | 1.04 | 1    | 0    | 104000 | 0    | 0   | 7.52 | 1.0000 | 1.0000 | 0.0000 | 0.0000 | 100000 | 0    | 0   | 100000 | 0    | 0   | .       | .       |
| 100000 | 1.05 | 1    | 0    | 105000 | 0    | 0   | 7.52 | 1.0000 | 1.0000 | 0.0000 | 0.0000 | 100000 | 0    | 0   | 100000 | 0    | 0   | .       | .       |
| 100000 | 1.06 | 1    | 0    | 106000 | 0    | 0   | 7.52 | 1.0000 | 1.0000 | 0.0000 | 0.0000 | 100000 | 0    | 0   | 100000 | 0    | 0   | .       | .       |
| 100000 | 1.07 | 1    | 0    | 107000 | 0    | 0   | 7.52 | 1.0000 | 1.0000 | 0.0000 | 0.0000 | 100000 | 0    | 0   | 100000 | 0    | 0   | .       | .       |

|        |      |   |   |        |   |   |      |        |        |        |        |        |   |   |        |   |   |   |   |
|--------|------|---|---|--------|---|---|------|--------|--------|--------|--------|--------|---|---|--------|---|---|---|---|
| 100000 | 1.08 | 1 | 0 | 108000 | 0 | 0 | 7.52 | 1.0000 | 1.0000 | 0.0000 | 0.0000 | 100000 | 0 | 0 | 100000 | 0 | 0 | . | . |
| 100000 | 1.09 | 1 | 0 | 109000 | 0 | 0 | 7.52 | 1.0000 | 1.0000 | 0.0000 | 0.0000 | 100000 | 0 | 0 | 100000 | 0 | 0 | . | . |
| 100000 | 1.10 | 1 | 0 | 110000 | 0 | 0 | 7.52 | 1.0000 | 1.0000 | 0.0000 | 0.0000 | 100000 | 0 | 0 | 100000 | 0 | 0 | . | . |
| 100000 | 1.11 | 1 | 0 | 111000 | 0 | 0 | 7.52 | 1.0000 | 1.0000 | 0.0000 | 0.0000 | 100000 | 0 | 0 | 100000 | 0 | 0 | . | . |
| 100000 | 1.12 | 1 | 0 | 112000 | 0 | 0 | 7.52 | 1.0000 | 1.0000 | 0.0000 | 0.0000 | 100000 | 0 | 0 | 100000 | 0 | 0 | . | . |
| 100000 | 1.13 | 1 | 0 | 113000 | 0 | 0 | 7.52 | 1.0000 | 1.0000 | 0.0000 | 0.0000 | 100000 | 0 | 0 | 100000 | 0 | 0 | . | . |
| 100000 | 1.14 | 1 | 0 | 114000 | 0 | 0 | 7.52 | 1.0000 | 1.0000 | 0.0000 | 0.0000 | 100000 | 0 | 0 | 100000 | 0 | 0 | . | . |
| 100000 | 1.15 | 1 | 0 | 115000 | 0 | 0 | 7.52 | 1.0000 | 1.0000 | 0.0000 | 0.0000 | 100000 | 0 | 0 | 100000 | 0 | 0 | . | . |
| 100000 | 1.16 | 1 | 0 | 116000 | 0 | 0 | 7.52 | 1.0000 | 1.0000 | 0.0000 | 0.0000 | 100000 | 0 | 0 | 100000 | 0 | 0 | . | . |
| 100000 | 1.17 | 1 | 0 | 117000 | 0 | 0 | 7.52 | 1.0000 | 1.0000 | 0.0000 | 0.0000 | 100000 | 0 | 0 | 100000 | 0 | 0 | . | . |
| 100000 | 1.18 | 1 | 0 | 118000 | 0 | 0 | 7.52 | 1.0000 | 1.0000 | 0.0000 | 0.0000 | 100000 | 0 | 0 | 100000 | 0 | 0 | . | . |
| 100000 | 1.19 | 1 | 0 | 119000 | 0 | 0 | 7.52 | 1.0000 | 1.0000 | 0.0000 | 0.0000 | 100000 | 0 | 0 | 100000 | 0 | 0 | . | . |
| 100000 | 1.20 | 1 | 0 | 120000 | 0 | 0 | 7.52 | 1.0000 | 1.0000 | 0.0000 | 0.0000 | 100000 | 0 | 0 | 100000 | 0 | 0 | . | . |
